# Supplementary material for: Lack of Association betweenSLC30A8Variants and Type 2 Diabetes in Mexican American Families
Source: Hindawi journal article supplement (doi:10.1155/2016/6463214), 2016-01-01
Supplement: f1 [file 6463214.f1.pdf]

**Supplementary Figure 1. Linkage disequilibrium among the studied SNPs (those in green are exonic SNPs)**

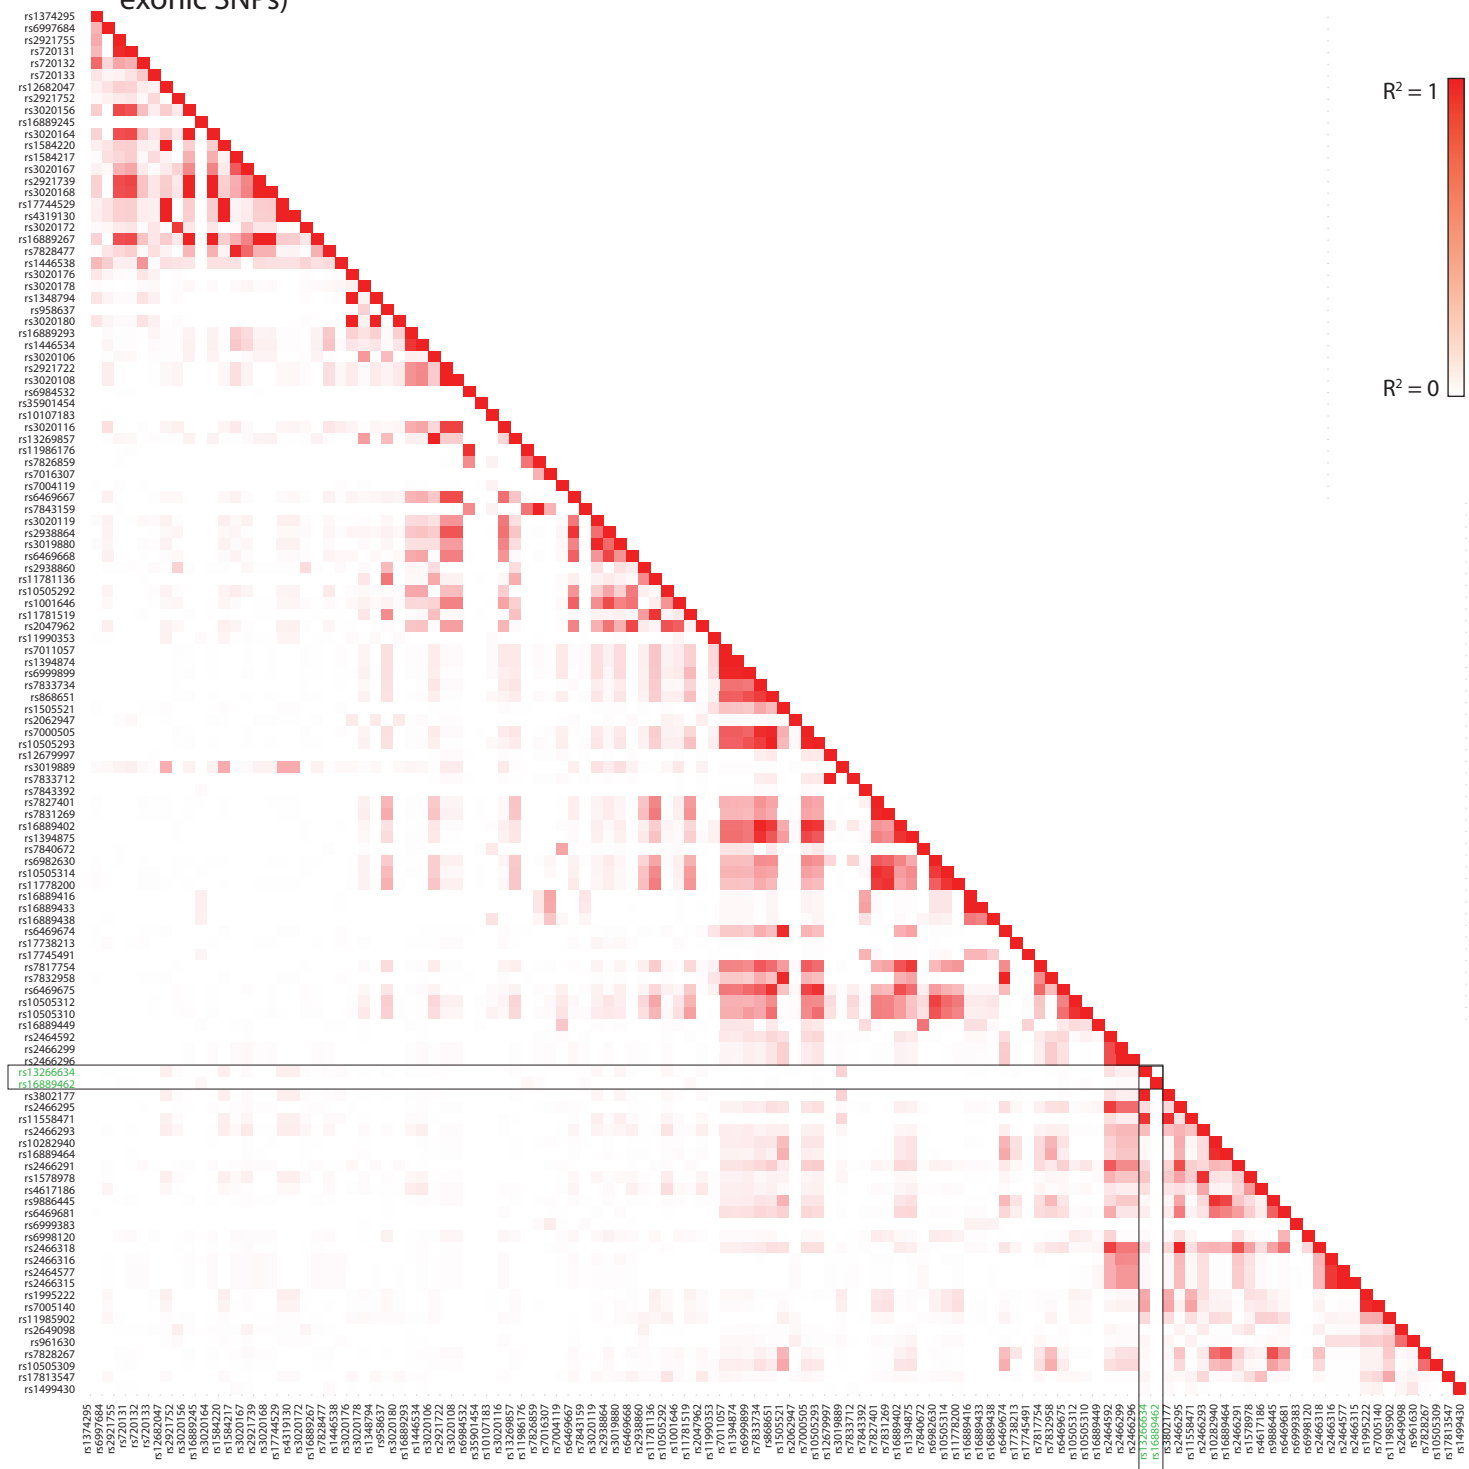

SUPPLEMENTARY TABLE 1

| SNP        | Basepair  | Major allele | Minor allele | MAF    | HWE-ChiSq | HWE-P  | Ever T2D |          |
|------------|-----------|--------------|--------------|--------|-----------|--------|----------|----------|
|            |           |              |              |        |           |        | chi      | p(SNP)   |
|            |           |              |              |        |           |        |          |          |
| rs1374295  | 116901727 | G            | T            | 0.2531 | 2.27      | 0.1322 | 0.115312 | 0.734176 |
| rs6997684  | 116901861 | C            | A            | 0.4818 | 0.62      | 0.4294 | 0.761496 | 0.382861 |
| rs2921755  | 116903318 | T            | C            | 0.4906 | 0.41      | 0.5228 | 1.36626  | 0.242455 |
| rs720131   | 116903776 | G            | A            | 0.4594 | 0.16      | 0.6883 | 1.31373  | 0.25172  |
| rs720132   | 116903996 | C            | T            | 0.2726 | 0.11      | 0.7376 | 0.06157  | 0.804032 |
| rs720133   | 116904042 | T            | C            | 0.3390 | 0.08      | 0.7757 | 0.890836 | 0.345251 |
| rs12682047 | 116905388 | T            | C            | 0.1468 | 0.12      | 0.7283 | 0.38205  | 0.536508 |
| rs2921752  | 116907274 | T            | G            | 0.0706 | 2.01      | 0.1563 | 0.237182 | 0.626249 |
| rs3020156  | 116909116 | G            | A            | 0.4840 | 0.00      | 0.9699 | 0.404392 | 0.52483  |
| rs16889245 | 116911977 | A            | G            | 0.0007 | 0.00      | 1.0000 | 0.999922 | 0.317329 |
| rs3020164  | 116914536 | T            | G            | 0.4725 | 0.00      | 0.9801 | 0.514232 | 0.473313 |
| rs1584220  | 116915698 | T            | G            | 0.1435 | 0.38      | 0.5387 | 0.41667  | 0.518603 |
| rs1584217  | 116915860 | G            | T            | 0.2240 | 1.99      | 0.1587 | 0.011594 | 0.914253 |
| rs3020167  | 116916586 | C            | T            | 0.3106 | 2.14      | 0.1438 | 0.313302 | 0.575661 |
| rs2921739  | 116917219 | C            | T            | 0.4800 | 0.00      | 0.9693 | 0.763798 | 0.382143 |
| rs3020168  | 116918578 | C            | T            | 0.4720 | 0.00      | 0.9475 | 0.264814 | 0.606832 |
| rs17744529 | 116918615 | G            | A            | 0.1436 | 0.35      | 0.5533 | 0.377944 | 0.538706 |
| rs4319130  | 116920945 | A            | C            | 0.1436 | 0.36      | 0.5483 | 0.41667  | 0.518603 |
| rs3020172  | 116921726 | A            | G            | 0.0825 | 3.53      | 0.0604 | 1.356566 | 0.244134 |
| rs16889267 | 116925656 | C            | T            | 0.4725 | 0.00      | 0.9801 | 0.514232 | 0.473313 |
| rs7828477  | 116932347 | A            | G            | 0.2278 | 1.43      | 0.2312 | 0.008334 | 0.927262 |
| rs1446538  | 116932401 | A            | G            | 0.3553 | 0.10      | 0.7548 | 0.447052 | 0.503738 |
| rs3020176  | 116935146 | A            | C            | 0.1934 | 0.06      | 0.8027 | 0.663408 | 0.415359 |
| rs3020178  | 116935759 | G            | A            | 0.1988 | 1.25      | 0.2630 | 1.776648 | 0.182561 |
| rs1348794  | 116936602 | A            | G            | 0.1916 | 0.07      | 0.7932 | 0.629134 | 0.427673 |
| rs958637   | 116936747 | A            | G            | 0.0498 | 0.27      | 0.6001 | 3.555474 | 0.059349 |
| rs3020180  | 116937517 | A            | G            | 0.1895 | 0.26      | 0.6099 | 0.856088 | 0.354836 |
| rs16889293 | 116939903 | C            | T            | 0.2960 | 0.78      | 0.3760 | 0.00034  | 0.985289 |
| rs1446534  | 116944800 | G            | A            | 0.2750 | 0.23      | 0.6340 | 0.01488  | 0.902912 |
| rs3020106  | 116946316 | G            | A            | 0.1429 | 0.06      | 0.8013 | 4.294566 | 0.038234 |
| rs2921722  | 116947908 | G            | T            | 0.4505 | 0.87      | 0.3507 | 1.064782 | 0.302127 |
| rs3020108  | 116948147 | G            | A            | 0.4504 | 0.77      | 0.3812 | 1.064782 | 0.302127 |
| rs6984532  | 116948907 | C            | T            | 0.0055 | 0.05      | 0.8178 | 6.554688 | 0.010461 |
| rs35901454 | 116959825 | G            | A            | 0.0007 | 0.00      | 1.0000 | 0.239834 | 0.624326 |
| rs10107183 | 116961569 | G            | T            | 0.0047 | 0.01      | 0.9425 | 0.100024 | 0.751801 |
| rs3020116  | 116962914 | T            | G            | 0.4912 | 0.46      | 0.4978 | 0.248778 | 0.617937 |
| rs13269857 | 116965328 | G            | A            | 0.1464 | 0.00      | 0.9931 | 4.412568 | 0.035675 |
| rs11986176 | 116967932 | T            | C            | 0.0065 | 0.10      | 0.7574 | 6.138516 | 0.013227 |
| rs7826859  | 116979371 | A            | G            | 0.0120 | 0.12      | 0.7294 | 2.985152 | 0.084031 |
| rs7016307  | 116988330 | A            | G            | 0.0036 | 0.50      | 0.4782 | 2.280554 | 0.131005 |
| rs7004119  | 116989423 | G            | T            | 0.0211 | 0.20      | 0.6511 | 0.83145  | 0.361854 |
| rs6469667  | 116990568 | A            | G            | 0.4189 | 0.03      | 0.8690 | 3.572436 | 0.058746 |
| rs7843159  | 116992908 | G            | A            | 0.0123 | 0.06      | 0.8087 | 2.985152 | 0.084031 |

|            |           |   |   |        |      |        |          |          |
|------------|-----------|---|---|--------|------|--------|----------|----------|
| rs3020119  | 116994332 | C | T | 0.4149 | 0.17 | 0.6797 | 1.049402 | 0.305645 |
| rs2938864  | 117000026 | A | G | 0.4490 | 1.08 | 0.2996 | 3.117238 | 0.077468 |
| rs3019880  | 117006635 | C | T | 0.4095 | 0.20 | 0.6544 | 0.806318 | 0.369211 |
| rs6469668  | 117010246 | A | G | 0.3810 | 0.81 | 0.3695 | 1.59258  | 0.206958 |
| rs2938860  | 117012309 | A | G | 0.1339 | 0.58 | 0.4477 | 0.32859  | 0.566491 |
| rs11781136 | 117016058 | A | G | 0.0651 | 0.32 | 0.5710 | 1.97553  | 0.159862 |
| rs10505292 | 117021088 | A | G | 0.2959 | 2.75 | 0.0971 | 1.504668 | 0.219954 |
| rs1001646  | 117021881 | C | T | 0.4841 | 1.57 | 0.2104 | 4.553068 | 0.03286  |
| rs11781519 | 117025077 | T | C | 0.0777 | 0.50 | 0.4800 | 1.85079  | 0.173691 |
| rs2047962  | 117027832 | C | T | 0.3771 | 1.97 | 0.1606 | 4.046906 | 0.044252 |
| rs11990353 | 117032043 | C | A | 0.0308 | 1.01 | 0.3141 | 2.749648 | 0.097276 |
| rs7011057  | 117040166 | G | A | 0.1940 | 0.33 | 0.5653 | 0.64431  | 0.422154 |
| rs1394874  | 117041250 | A | G | 0.1942 | 0.38 | 0.5366 | 0.49476  | 0.481812 |
| rs6999899  | 117045338 | A | C | 0.2012 | 0.17 | 0.6814 | 0.534376 | 0.464773 |
| rs7833734  | 117058576 | G | T | 0.1720 | 3.73 | 0.0535 | 0.080776 | 0.776249 |
| rs868651   | 117062487 | A | G | 0.2095 | 2.92 | 0.0872 | 0.167506 | 0.682338 |
| rs1505521  | 117063876 | C | T | 0.0698 | 0.11 | 0.7369 | 1.72059  | 0.189617 |
| rs2062947  | 117066457 | C | T | 0.1049 | 1.01 | 0.3140 | 1.287642 | 0.256483 |
| rs7000505  | 117066559 | T | G | 0.1916 | 6.40 | 0.0114 | 0.229728 | 0.631726 |
| rs10505293 | 117072712 | G | A | 0.2080 | 3.15 | 0.0761 | 0.449146 | 0.502741 |
| rs12679997 | 117075816 | G | A | 0.0207 | 0.45 | 0.5044 | 0.02669  | 0.870227 |
| rs3019889  | 117081316 | T | C | 0.0742 | 3.63 | 0.0568 | 0.207184 | 0.648984 |
| rs7833712  | 117086368 | C | A | 0.0199 | 0.39 | 0.5318 | 0.091036 | 0.762864 |
| rs7843392  | 117088354 | C | T | 0.0076 | 0.13 | 0.7230 | 0        | 1        |
| rs7827401  | 117088480 | T | C | 0.0860 | 2.58 | 0.1086 | 4.392018 | 0.036108 |
| rs7831269  | 117090660 | C | A | 0.0778 | 1.64 | 0.2004 | 3.1225   | 0.077218 |
| rs16889402 | 117101065 | G | A | 0.1794 | 4.23 | 0.0396 | 2.285242 | 0.13061  |
| rs1394875  | 117102069 | A | G | 0.1587 | 4.93 | 0.0264 | 0.329814 | 0.565769 |
| rs7840672  | 117105515 | G | A | 0.0151 | 0.07 | 0.7965 | 0.404302 | 0.524876 |
| rs6982630  | 117106584 | A | G | 0.1092 | 0.19 | 0.6671 | 2.306414 | 0.128841 |
| rs10505314 | 117106933 | T | C | 0.0889 | 3.02 | 0.0824 | 2.230188 | 0.135337 |
| rs11778200 | 117108093 | A | G | 0.0825 | 1.58 | 0.2092 | 1.019508 | 0.312636 |
| rs16889416 | 117114869 | T | C | 0.0105 | 0.16 | 0.6905 | 0.19396  | 0.659641 |
| rs16889433 | 117123300 | A | C | 0.0108 | 0.16 | 0.6917 | 0.229734 | 0.631721 |
| rs16889438 | 117131057 | C | T | 0.0117 | 0.12 | 0.7254 | 0.08945  | 0.764877 |
| rs6469674  | 117131504 | A | G | 0.0742 | 0.04 | 0.8470 | 6.806068 | 0.009085 |
| rs17738213 | 117133715 | A | G | 0.0276 | 0.65 | 0.4199 | 0.038212 | 0.845018 |
| rs17745491 | 117134070 | G | T | 0.0036 | 0.03 | 0.8726 | 0.054922 | 0.81471  |
| rs7817754  | 117142742 | A | G | 0.1530 | 3.80 | 0.0511 | 4.35309  | 0.036942 |
| rs7832958  | 117146091 | A | G | 0.0728 | 0.04 | 0.8436 | 6.907926 | 0.008581 |
| rs6469675  | 117152910 | A | G | 0.2246 | 2.48 | 0.1150 | 2.663478 | 0.102676 |
| rs10505312 | 117158022 | A | G | 0.1226 | 0.64 | 0.4225 | 0.541064 | 0.461992 |
| rs10505310 | 117162396 | C | T | 0.1448 | 0.03 | 0.8655 | 0.305202 | 0.580639 |
| rs16889449 | 117162479 | C | A | 0.0167 | 0.14 | 0.7095 | 0.479714 | 0.488552 |
| rs2464592  | 117171312 | T | C | 0.2617 | 0.58 | 0.4446 | 0.006012 | 0.938196 |
| rs2466299  | 117171348 | C | T | 0.2009 | 0.10 | 0.7509 | 0        | 1        |
| rs2466296  | 117171888 | C | T | 0.2008 | 0.14 | 0.7056 | 0        | 1        |

|            |           |   |   |        |      |        |          |          |
|------------|-----------|---|---|--------|------|--------|----------|----------|
| rs13266634 | 117172544 | C | T | 0.2270 | 0.01 | 0.9324 | 1.46155  | 0.226684 |
| rs16889462 | 117172545 | G | A | 0.0044 | 0.01 | 0.9084 | 0.332392 | 0.564254 |
| rs3802177  | 117172786 | C | T | 0.2278 | 0.07 | 0.7884 | 0.484076 | 0.486582 |
| rs2466295  | 117172802 | A | G | 0.3038 | 0.06 | 0.8131 | 0.328908 | 0.566303 |
| rs11558471 | 117173494 | A | G | 0.2540 | 0.00 | 0.9948 | 0.463516 | 0.495985 |
| rs2466293  | 117173699 | T | C | 0.4989 | 5.12 | 0.0236 | 0.00028  | 0.986649 |
| rs10282940 | 117175587 | G | A | 0.1168 | 0.69 | 0.4077 | 0.677082 | 0.410593 |
| rs16889464 | 117177164 | T | C | 0.1070 | 0.02 | 0.8971 | 0.965496 | 0.325806 |
| rs2466291  | 117178154 | C | T | 0.3531 | 0.05 | 0.8149 | 1.93311  | 0.164419 |
| rs1578978  | 117184564 | T | C | 0.4700 | 2.93 | 0.0872 | 0.025366 | 0.873459 |
| rs4617186  | 117188190 | A | G | 0.2679 | 0.61 | 0.4363 | 0.000358 | 0.984904 |
| rs9886445  | 117188334 | G | A | 0.1238 | 0.70 | 0.4012 | 0.99381  | 0.318813 |
| rs6469681  | 117191195 | A | G | 0.1842 | 0.10 | 0.7462 | 1.628242 | 0.201946 |
| rs6999383  | 117197827 | A | G | 0.0018 | 0.03 | 0.8594 | 2.294108 | 0.129866 |
| rs6998120  | 117203062 | A | G | 0.0586 | 0.69 | 0.4071 | 0.113756 | 0.735908 |
| rs2466318  | 117205068 | G | A | 0.2990 | 0.02 | 0.8997 | 0.594184 | 0.440806 |
| rs2466316  | 117205358 | T | C | 0.1090 | 6.20 | 0.0128 | 0.109264 | 0.740984 |
| rs2464577  | 117206282 | C | T | 0.1034 | 0.58 | 0.4445 | 0.48847  | 0.484611 |
| rs2466315  | 117207144 | T | C | 0.1034 | 0.58 | 0.4445 | 0.48847  | 0.484611 |
| rs1995222  | 117217523 | G | A | 0.3397 | 0.97 | 0.3255 | 0.000356 | 0.984946 |
| rs7005140  | 117221908 | A | G | 0.3449 | 0.44 | 0.5088 | 0.402472 | 0.525815 |
| rs11985902 | 117222649 | G | A | 0.3737 | 0.03 | 0.8657 | 1.42585  | 0.232443 |
| rs2649098  | 117223033 | G | A | 0.1734 | 2.26 | 0.1328 | 0.757648 | 0.384066 |
| rs961630   | 117223771 | G | A | 0.2679 | 0.51 | 0.4739 | 0.700146 | 0.402735 |
| rs7828267  | 117223802 | T | C | 0.1211 | 0.19 | 0.6655 | 2.082562 | 0.14899  |
| rs10505309 | 117224767 | T | C | 0.0941 | 0.00 | 0.9648 | 2.46172  | 0.116651 |
| rs17813547 | 117225125 | T | C | 0.2272 | 0.28 | 0.5960 | 0.026366 | 0.87101  |
| rs1499430  | 117225878 | C | A | 0.1482 | 1.85 | 0.1739 | 1.881334 | 0.170183 |



| Association with T2D-related traits |              |          |          |                 |          |          |                 |          |          |
|-------------------------------------|--------------|----------|----------|-----------------|----------|----------|-----------------|----------|----------|
|                                     | Incident T2D |          |          | Fasting glucose |          |          | Fasting insulin |          |          |
| bSNP                                | chi          | p(SNP)   | bSNP     | chi             | p(SNP)   | bSNP     | chi             | p(SNP)   | bSNP     |
| 0.023246                            | 3.097598     | 0.078408 | 0.162622 | 0.642838        | 0.422685 | 0.031531 | 0.038138        | 0.845166 | 0.009722 |
| 0.053584                            | 0.053094     | 0.817764 | -0.01938 | 0.055432        | 0.813867 | -0.00814 | 0.002854        | 0.957395 | 0.002314 |
| 0.070863                            | 7.855828     | 0.005066 | 0.222101 | 0.87135         | 0.350582 | 0.032133 | 0.20746         | 0.648766 | -0.01985 |
| -0.06993                            | 6.662194     | 0.009848 | -0.20552 | 0.907328        | 0.340824 | -0.03331 | 0.03028         | 0.861856 | 0.007696 |
| -0.01668                            | 1.536598     | 0.215125 | 0.111521 | 0.08419         | 0.771698 | 0.01126  | 0.223448        | 0.636425 | 0.023366 |
| 0.061873                            | 0.617822     | 0.431858 | 0.066743 | 1.254812        | 0.262635 | 0.041115 | 2.061792        | 0.151032 | -0.0664  |
| -0.05166                            | 1.249138     | 0.263717 | -0.12561 | 0.165024        | 0.684573 | -0.01926 | 0.027404        | 0.868518 | 0.009909 |
| -0.05885                            | 0.813672     | 0.367037 | -0.13979 | 0.050422        | 0.822331 | 0.015495 | 1.824838        | 0.176738 | -0.11683 |
| -0.03814                            | 2.72701      | 0.098664 | -0.13082 | 0.29448         | 0.587364 | -0.01869 | 0.619578        | 0.431204 | 0.034215 |
| -0.9911                             | 0.117724     | 0.731516 | 1.250011 | 0.001644        | 0.967658 | 0.000907 | 0.316454        | 0.573747 | 0.533889 |
| -0.04302                            | 2.986888     | 0.083941 | -0.137   | 0.235264        | 0.627648 | -0.01682 | 0.231452        | 0.630449 | 0.02105  |
| -0.05446                            | 1.217474     | 0.269857 | -0.12465 | 0.244518        | 0.620962 | -0.02366 | 0.012388        | 0.911377 | -0.00672 |
| 0.007718                            | 0.240338     | 0.623962 | -0.04591 | 0.211084        | 0.645919 | -0.01863 | 0.367416        | 0.544416 | 0.030917 |
| -0.03664                            | 1.266614     | 0.260403 | -0.09565 | 0.356366        | 0.550531 | -0.0222  | 0.009006        | 0.924394 | 0.004437 |
| -0.05243                            | 2.972754     | 0.084678 | -0.13634 | 0.065682        | 0.797731 | -0.00887 | 0.271174        | 0.602545 | 0.022744 |
| -0.03088                            | 2.466732     | 0.116279 | -0.12431 | 0.222922        | 0.636822 | -0.01636 | 0.276586        | 0.598948 | 0.022998 |
| -0.05162                            | 1.402048     | 0.236381 | -0.13258 | 0.18627         | 0.666039 | -0.02056 | 0.000622        | 0.980103 | -0.0015  |
| -0.05446                            | 1.217474     | 0.269857 | -0.12465 | 0.244518        | 0.620962 | -0.02366 | 0.012388        | 0.911377 | -0.00672 |
| -0.12846                            | 1.388312     | 0.23869  | -0.16655 | 0.011332        | 0.915224 | -0.00682 | 0.405736        | 0.524142 | -0.05128 |
| -0.04304                            | 2.986888     | 0.083941 | -0.137   | 0.235264        | 0.627648 | -0.01682 | 0.231452        | 0.630449 | 0.02105  |
| 0.006415                            | 0.182178     | 0.669508 | -0.03919 | 0.133278        | 0.715057 | -0.01467 | 0.315788        | 0.57415  | 0.028394 |
| -0.04125                            | 0.128052     | 0.72046  | 0.029057 | 0.01621         | 0.898688 | -0.00452 | 0.004608        | 0.945879 | -0.00304 |
| -0.06268                            | 0.052422     | 0.818901 | -0.02325 | 1.185166        | 0.276307 | 0.046994 | 0.047056        | 0.828268 | 0.011877 |
| 0.099992                            | 0.09292      | 0.760497 | 0.02952  | 4.09776         | 0.04294  | -0.08662 | 0.363482        | 0.546579 | -0.03257 |
| -0.06103                            | 0.108086     | 0.742334 | -0.03337 | 0.89074         | 0.345277 | 0.040866 | 0.135588        | 0.712707 | 0.020218 |
| 0.268325                            | 0.692684     | 0.405253 | 0.144013 | 4.0396          | 0.044444 | -0.1557  | 0.132554        | 0.715799 | -0.03567 |
| -0.07192                            | 0.208248     | 0.648144 | -0.04643 | 1.099658        | 0.294341 | 0.045684 | 0.188982        | 0.663765 | 0.024029 |
| 0.001476                            | 0.0854       | 0.770109 | -0.02458 | 1.881796        | 0.17013  | -0.05119 | 0.141568        | 0.706727 | -0.01766 |
| -0.00793                            | 0.317968     | 0.572831 | -0.04776 | 0.395756        | 0.529289 | -0.0239  | 0.063282        | 0.801382 | -0.012   |
| 0.182984                            | 2.679232     | 0.101665 | 0.189266 | 4.22631         | 0.039802 | -0.10228 | 4.888618        | 0.027034 | -0.13811 |
| 0.061728                            | 0.11932      | 0.729773 | 0.026784 | 6.60973         | 0.010142 | -0.08806 | 4.136038        | 0.041979 | -0.08763 |
| 0.061728                            | 0.11932      | 0.729773 | 0.026784 | 6.60973         | 0.010142 | -0.08806 | 4.136038        | 0.041979 | -0.08763 |
| -0.8742                             | 0.62151      | 0.430487 | -0.39212 | 1.24441         | 0.264623 | 0.276971 | 0.103192        | 0.748032 | -0.09967 |
| -0.44936                            | 0.374916     | 0.540337 | 3.289441 | 0.000416        | 0.983727 | -0.00031 | 0.403304        | 0.525388 | 0.593905 |
| -0.11451                            | 0.028214     | 0.866607 | -0.07765 | 1.030228        | 0.310105 | 0.213705 | 1.232446        | 0.266932 | -0.29216 |
| -0.02945                            | 0.059062     | 0.807985 | -0.01851 | 2.72449         | 0.09882  | 0.055871 | 2.313648        | 0.128243 | 0.064853 |
| 0.184195                            | 3.087868     | 0.078878 | 0.201818 | 3.351376        | 0.067149 | -0.08991 | 4.976302        | 0.025697 | -0.1375  |
| -0.76364                            | 0.082436     | 0.774023 | -0.13064 | 0.51805         | 0.471675 | 0.162467 | 0.364048        | 0.546267 | -0.17024 |
| -0.44381                            | 0.06265      | 0.802355 | 0.089617 | 0.592644        | 0.441399 | 0.124669 | 0.287334        | 0.591934 | -0.10865 |
| 3.711865                            | 1.606894     | 0.204929 | 3.720952 | 0.003378        | 0.953653 | 0.001536 | 0.02738         | 0.868575 | 0.05798  |
| 0.20081                             | 0.000132     | 0.990833 | 0.003368 | 0.713434        | 0.398306 | -0.09779 | 3.102686        | 0.078163 | -0.2544  |
| 0.115135                            | 1.652262     | 0.198651 | 0.100628 | 7.258496        | 0.007057 | -0.09339 | 3.867472        | 0.049231 | -0.08571 |
| -0.44383                            | 0.06265      | 0.802355 | 0.089617 | 0.592644        | 0.441399 | 0.124694 | 0.287334        | 0.591934 | -0.10865 |

|           |          |          |          |          |          |          |          |          |          |
|-----------|----------|----------|----------|----------|----------|----------|----------|----------|----------|
| -0.06189  | 0.326446 | 0.567759 | -0.04517 | 3.33694  | 0.06774  | 0.062938 | 3.202338 | 0.073533 | 0.077685 |
| 0.106724  | 1.64902  | 0.199092 | 0.099768 | 7.182448 | 0.007362 | -0.09184 | 5.995886 | 0.014339 | -0.10549 |
| -0.05493  | 0.10252  | 0.748826 | -0.02581 | 2.856774 | 0.09099  | 0.058855 | 1.616228 | 0.203619 | 0.055728 |
| 0.078032  | 1.121644 | 0.289565 | 0.082629 | 4.615468 | 0.031685 | -0.0743  | 4.928528 | 0.026417 | -0.09637 |
| 0.051722  | 0.104156 | 0.746898 | -0.03692 | 0.441956 | 0.50618  | -0.03408 | 0.003454 | 0.953135 | 0.00378  |
| 0.177687  | 0.061274 | 0.804493 | 0.040488 | 1.780814 | 0.182049 | -0.09387 | 0.508982 | 0.47558  | -0.06294 |
| 0.081805  | 1.518584 | 0.217834 | 0.103422 | 3.786564 | 0.051666 | -0.07316 | 0.391364 | 0.531583 | -0.02937 |
| 0.128505  | 3.102496 | 0.078172 | 0.137223 | 6.348338 | 0.011749 | -0.08561 | 3.783032 | 0.051775 | -0.08308 |
| 0.158244  | 0.28594  | 0.592834 | 0.078814 | 1.632854 | 0.201309 | -0.08249 | 0.390968 | 0.531791 | -0.05082 |
| 0.125105  | 4.467682 | 0.034542 | 0.167439 | 3.772464 | 0.052103 | -0.06713 | 3.87326  | 0.049061 | -0.0853  |
| -0.28363  | 3.076322 | 0.07944  | -0.37618 | 0.070896 | 0.790037 | 0.02611  | 0.923272 | 0.336617 | 0.119099 |
| 0.06157   | 0.004104 | 0.94892  | 0.006331 | 3.010644 | 0.082719 | -0.07446 | 0.96572  | 0.32575  | -0.05292 |
| 0.053887  | 0.004104 | 0.94892  | 0.006331 | 3.010646 | 0.082719 | -0.07446 | 0.965722 | 0.325749 | -0.05292 |
| 0.055361  | 0.022248 | 0.881429 | 0.014664 | 2.352644 | 0.125071 | -0.06448 | 0.544788 | 0.460455 | -0.03901 |
| 0.022965  | 0.00242  | 0.960765 | -0.00523 | 0.01643  | 0.898007 | -0.00597 | 0.049552 | 0.823845 | -0.01302 |
| 0.030422  | 0.053446 | 0.817172 | 0.022609 | 0.141708 | 0.706589 | -0.01588 | 0.375556 | 0.539991 | -0.03251 |
| -0.14878  | 2.058036 | 0.151405 | -0.21578 | 0.307736 | 0.579073 | 0.036294 | 0.152808 | 0.695866 | 0.032032 |
| 0.11706   | 1.888964 | 0.169319 | 0.175361 | 0.962558 | 0.326543 | 0.055432 | 2.069062 | 0.150314 | -0.10269 |
| 0.036942  | 0.00161  | 0.967994 | -0.0041  | 0.020156 | 0.887102 | -0.00621 | 0.359988 | 0.548513 | -0.03302 |
| -0.15919  | 0.472356 | 0.491905 | 0.203159 | 0.00018  | 0.989296 | 0.001834 | 0.32997  | 0.565677 | -0.09889 |
| -0.03673  | 2.708234 | 0.099832 | 0.5884   | 0.006114 | 0.937675 | -0.01006 | 3.005604 | 0.082977 | -0.27773 |
| -0.04937  | 0.131548 | 0.716832 | -0.05438 | 1.449462 | 0.228614 | 0.07619  | 0.583574 | 0.444915 | 0.061237 |
| -0.0687   | 2.214576 | 0.136713 | 0.541    | 0.063206 | 0.801499 | -0.033   | 2.469678 | 0.116062 | -0.25708 |
| -3.7E-05  | 3.61533  | 0.057249 | 3.994874 | 2.626102 | 0.10512  | 0.341013 | 0.447738 | 0.503411 | 0.17606  |
| 0.288768  | 1.15936  | 0.281598 | 0.194101 | 0.419954 | 0.51696  | -0.04869 | 0.374098 | 0.540779 | 0.057702 |
| 0.252397  | 0.248774 | 0.61794  | 0.091412 | 0.671144 | 0.412653 | -0.06405 | 0.020372 | 0.886503 | 0.014029 |
| -0.32865  | 0.229932 | 0.631574 | -0.14237 | 0.05547  | 0.813805 | 0.028084 | 0.18865  | 0.664043 | 0.06562  |
| -0.09516  | 3.36444  | 0.066618 | -0.45051 | 0.000504 | 0.982089 | -0.00203 | 5.010104 | 0.0252   | 0.256594 |
| 0.167979  | 0.379102 | 0.538084 | 0.262515 | 4.284666 | 0.038458 | -0.30709 | 2.81197  | 0.093563 | -0.31025 |
| 0.197828  | 1.444686 | 0.229382 | 0.212767 | 0.762464 | 0.382559 | -0.06427 | 0.001824 | 0.965934 | 0.003963 |
| 0.198309  | 0.113224 | 0.736503 | 0.058934 | 0.572844 | 0.449131 | -0.05596 | 0.965206 | 0.325879 | 0.091634 |
| 0.131786  | 0.15425  | 0.694507 | -0.06589 | 2.160714 | 0.141579 | -0.10724 | 0.100306 | 0.751463 | 0.029156 |
| 0.135364  | 1.157376 | 0.28201  | 0.505039 | 1.678518 | 0.195122 | 0.219808 | 0.85218  | 0.355936 | 0.195906 |
| 0.146761  | 1.333922 | 0.248109 | 0.537991 | 2.506524 | 0.113376 | 0.265396 | 1.025992 | 0.311102 | 0.212645 |
| 0.079778  | 0.749768 | 0.38655  | 0.408877 | 0.215986 | 0.642116 | 0.071636 | 0.017644 | 0.894327 | -0.02558 |
| -0.33963  | 5.296246 | 0.021371 | -0.39592 | 2.613914 | 0.10593  | 0.122017 | 0.349046 | 0.554654 | 0.055871 |
| -0.03706  | 0.351852 | 0.553067 | 0.137191 | 1.807726 | 0.178781 | -0.14215 | 3.128474 | 0.076936 | 0.235737 |
| -0.12015  | 1.939556 | 0.163717 | 3.747398 | 1.646222 | 0.199474 | 0.373945 | 0.018654 | 0.891363 | -0.04975 |
| -0.2928   | 11.02586 | 0.000898 | -0.66644 | 0.839328 | 0.359589 | 0.072698 | 2.268414 | 0.132035 | 0.150896 |
| -0.34171  | 5.43025  | 0.019791 | -0.3997  | 2.578878 | 0.108298 | 0.120861 | 0.48496  | 0.486184 | 0.065665 |
| -0.24048  | 1.731828 | 0.188178 | -0.24544 | 2.14256  | 0.143263 | 0.119802 | 0.627474 | 0.428283 | 0.081964 |
| 0.089977  | 0.829286 | 0.362479 | 0.144911 | 0.9418   | 0.331815 | -0.06741 | 1.428306 | 0.232041 | -0.10393 |
| 0.062908  | 0.769946 | 0.380234 | 0.128037 | 1.181984 | 0.276952 | -0.07008 | 1.040842 | 0.307626 | -0.08249 |
| 0.17908   | 1.068082 | 0.301379 | 0.420554 | 1.311334 | 0.252153 | -0.16557 | 0.564612 | 0.452408 | -0.13555 |
| -0.00584  | 0.092604 | 0.760892 | -0.02979 | 0.425188 | 0.51436  | 0.027224 | 0.10079  | 0.750884 | -0.01673 |
| -2.85E-07 | 0.026308 | 0.87115  | -0.01686 | 0.730712 | 0.392653 | 0.037778 | 0.25889  | 0.610884 | -0.02834 |
| -2.85E-07 | 0.026308 | 0.87115  | -0.01686 | 0.730712 | 0.392653 | 0.037778 | 0.25889  | 0.610884 | -0.02834 |

|          |          |          |          |          |          |          |          |          |          |
|----------|----------|----------|----------|----------|----------|----------|----------|----------|----------|
| 0.086513 | 0.47662  | 0.489957 | 0.064914 | 0.35506  | 0.551263 | -0.02374 | 0.00868  | 0.925771 | 0.004674 |
| 0.322492 | 3.115162 | 0.077567 | 3.804443 | 0.05722  | 0.810945 | 0.06526  | 0.162398 | 0.686958 | -0.14159 |
| 0.049739 | 0.171516 | 0.678768 | 0.038999 | 0.07562  | 0.783323 | -0.01095 | 0.158734 | 0.690325 | 0.01996  |
| -0.03964 | 0.186628 | 0.665738 | -0.03887 | 0.506806 | 0.476525 | 0.027629 | 0.043904 | 0.834032 | 0.010283 |
| 0.047016 | 0.230824 | 0.630914 | 0.043698 | 0.018144 | 0.892849 | 0.005175 | 0.266934 | 0.605396 | 0.024972 |
| -0.00077 | 0.07024  | 0.790988 | 0.021336 | 0.137186 | 0.711095 | -0.01288 | 0.69448  | 0.404645 | -0.03664 |
| -0.07878 | 0.859534 | 0.353869 | -0.11206 | 0.042438 | 0.836787 | -0.01122 | 0.19396  | 0.659641 | 0.0301   |
| -0.09601 | 0.658828 | 0.416974 | -0.10127 | 0.089656 | 0.764615 | -0.01675 | 0.000864 | 0.97655  | -0.00207 |
| -0.09714 | 1.783752 | 0.181689 | -0.12243 | 1.47865  | 0.223986 | 0.047895 | 1.253348 | 0.262914 | 0.055602 |
| -0.00991 | 0.000012 | 0.997236 | 0.000186 | 0.088002 | 0.766733 | -0.01035 | 0.558246 | 0.454968 | -0.03303 |
| -0.00118 | 0.0061   | 0.937747 | 0.007327 | 0.000056 | 0.994029 | 0.000359 | 0.224436 | 0.63568  | -0.02397 |
| -0.0941  | 0.673672 | 0.411774 | -0.09851 | 0.001822 | 0.965953 | 0.002292 | 0.223998 | 0.63601  | 0.032157 |
| -0.10706 | 1.881526 | 0.170161 | -0.14766 | 0.041822 | 0.837959 | 0.009716 | 0.804832 | 0.369653 | 0.053926 |
| 4.289455 | 0.432194 | 0.510914 | 3.183938 | 1.626918 | 0.20213  | 0.442978 | 0.233618 | 0.628854 | 0.209789 |
| -0.04522 | 0.435348 | 0.509376 | -0.11459 | 0.009606 | 0.921924 | 0.007433 | 0.35498  | 0.551307 | 0.056573 |
| -0.05431 | 0.781044 | 0.376822 | -0.08098 | 0.41421  | 0.51984  | 0.02539  | 0.462452 | 0.49648  | 0.033912 |
| 0.032509 | 0.063324 | 0.801317 | 0.032803 | 0.3111   | 0.577006 | 0.030575 | 0.030178 | 0.862087 | -0.01199 |
| 0.070356 | 0.36493  | 0.545781 | 0.082522 | 0.063852 | 0.800508 | 0.014059 | 0.064708 | 0.799204 | -0.01781 |
| 0.070356 | 0.36493  | 0.545781 | 0.082522 | 0.063852 | 0.800508 | 0.014059 | 0.064708 | 0.799204 | -0.01781 |
| -0.00114 | 0.066858 | 0.795968 | -0.02131 | 0.198176 | 0.656197 | 0.01588  | 0.833522 | 0.361256 | 0.041106 |
| 0.040379 | 0.011806 | 0.913476 | -0.00892 | 0.155388 | 0.693439 | 0.013925 | 1.880794 | 0.170244 | 0.060996 |
| -0.07471 | 0.5506   | 0.458073 | -0.06141 | 0.009822 | 0.921054 | -0.00357 | 0.54731  | 0.459419 | 0.033633 |
| 0.071084 | 0.587214 | 0.443499 | 0.080805 | 0.785292 | 0.375528 | -0.04053 | 3.77572  | 0.052001 | -0.11193 |
| 0.058425 | 0.71436  | 0.398    | 0.076387 | 0.094424 | 0.758626 | -0.01193 | 5.83057  | 0.01575  | -0.11874 |
| -0.13443 | 1.003696 | 0.316418 | -0.12177 | 0.008838 | 0.925101 | -0.00506 | 0.011312 | 0.915298 | 0.007708 |
| -0.16809 | 2.836454 | 0.092147 | -0.23797 | 0.278758 | 0.597516 | 0.032364 | 0.039158 | 0.843136 | -0.01529 |
| -0.01153 | 0.004666 | 0.94554  | 0.00639  | 0.017526 | 0.894679 | -0.00547 | 0.31906  | 0.572173 | 0.029514 |
| 0.116389 | 0.000152 | 0.990163 | 0.001499 | 0.558696 | 0.454786 | 0.03516  | 1.171274 | 0.27914  | 0.064204 |

using measured genotype approach

| 2-hour glucose |          |          | 2-hour insulin |          |          | HOMA-IR  |          |          |          |
|----------------|----------|----------|----------------|----------|----------|----------|----------|----------|----------|
| chi            | p(SNP)   | bSNP     | chi            | p(SNP)   | bSNP     | chi      | p(SNP)   | bSNP     | chi      |
| 2.066696       | 0.150547 | 0.057671 | 2.300466       | 0.129335 | 0.075747 | 0.506582 | 0.476622 | 0.033848 | 0.002    |
| 0.40846        | 0.522752 | -0.02246 | 2.595034       | 0.107199 | -0.07004 | 0.00266  | 0.958867 | 0.00217  | 0.150922 |
| 0.631124       | 0.426943 | 0.027825 | 0.002728       | 0.958345 | 0.002268 | 0.09742  | 0.754948 | 0.013112 | 0.123126 |
| 0.46813        | 0.493849 | -0.02431 | 0.035484       | 0.850585 | -0.0083  | 0.106152 | 0.744568 | -0.01388 | 0.004122 |
| 5.306144       | 0.02125  | 0.090868 | 1.542486       | 0.214248 | 0.061202 | 0.112498 | 0.737318 | 0.015827 | 0.022112 |
| 0.280886       | 0.596121 | -0.01988 | 0.508142       | 0.475944 | -0.03297 | 0.557108 | 0.455428 | -0.03322 | 0.04821  |
| 0.93805        | 0.33278  | -0.04642 | 0.06045        | 0.805786 | 0.014635 | 0.000058 | 0.993924 | -0.00044 | 0.092538 |
| 1.370628       | 0.241704 | 0.082775 | 0.173266       | 0.677225 | 0.036316 | 1.332586 | 0.248346 | -0.0955  | 0.022042 |
| 0.224482       | 0.635646 | -0.01664 | 0.364564       | 0.545982 | 0.026207 | 0.099454 | 0.752486 | 0.01317  | 0.006988 |
| 0.373232       | 0.541248 | 0.465982 | 0.003792       | 0.950898 | -0.0578  | 0.993422 | 0.318907 | -0.50281 | 0.421142 |
| 0.768314       | 0.380739 | -0.03098 | 0.061532       | 0.804091 | 0.010832 | 0.017408 | 0.895032 | 0.005545 | 0.035314 |
| 0.659554       | 0.416717 | -0.03929 | 0.086276       | 0.768966 | 0.017645 | 0.008982 | 0.924495 | -0.00553 | 0.059194 |
| 1.133486       | 0.287033 | -0.04404 | 0.158166       | 0.690851 | -0.02035 | 0.054558 | 0.815314 | 0.01156  | 0.053242 |
| 0.000042       | 0.994829 | 0.000399 | 0.049972       | 0.823112 | 0.01048  | 0.0213   | 0.883965 | 0.006587 | 0.376316 |
| 0.467936       | 0.493938 | -0.02415 | 0.051266       | 0.820875 | 0.00987  | 0.002608 | 0.959271 | 0.00214  | 0.169738 |
| 0.68338        | 0.408425 | -0.0292  | 0.055456       | 0.813828 | 0.010274 | 0.003014 | 0.956218 | 0.002307 | 0.038836 |
| 0.473672       | 0.491303 | -0.03317 | 0.18519        | 0.666951 | 0.025747 | 0.001568 | 0.968414 | -0.0023  | 0.095862 |
| 0.659554       | 0.416717 | -0.03929 | 0.086276       | 0.768966 | 0.017645 | 0.008982 | 0.924495 | -0.00553 | 0.059194 |
| 3.889778       | 0.048581 | 0.129602 | 2.185092       | 0.139353 | 0.119973 | 0.004494 | 0.946552 | 0.005131 | 0.171876 |
| 0.768314       | 0.380739 | -0.03098 | 0.061532       | 0.804091 | 0.010832 | 0.017408 | 0.895032 | 0.005545 | 0.035314 |
| 1.266138       | 0.260492 | -0.04611 | 0.189188       | 0.663593 | -0.02206 | 0.000846 | 0.976796 | 0.001421 | 0.022502 |
| 8.535374       | 0.003483 | 0.105421 | 2.227088       | 0.135609 | 0.067144 | 0.297262 | 0.585604 | 0.023387 | 0.561518 |
| 0.015114       | 0.902155 | -0.00543 | 0.021816       | 0.882578 | -0.00814 | 0.316558 | 0.573684 | -0.02958 | 0.400246 |
| 3.946028       | 0.046982 | -0.08647 | 3.571152       | 0.058791 | -0.10211 | 1.21847  | 0.269661 | -0.05713 | 0.759386 |
| 0.036124       | 0.84926  | -0.00842 | 0.001084       | 0.973735 | -0.00182 | 0.205832 | 0.650054 | -0.02395 | 0.253558 |
| 8.976902       | 0.002734 | -0.23516 | 5.370954       | 0.020475 | -0.22586 | 2.21452  | 0.136718 | -0.14324 | 0.078846 |
| 0.001454       | 0.969583 | -0.0017  | 0.01226        | 0.911834 | 0.00616  | 0.091776 | 0.761931 | -0.01611 | 0.358844 |
| 1.460522       | 0.226847 | 0.046083 | 2.219286       | 0.136296 | 0.070448 | 0.248782 | 0.617934 | -0.02265 | 1.368852 |
| 1.74637        | 0.186334 | 0.051085 | 1.57235        | 0.209866 | 0.060077 | 0.049134 | 0.824577 | -0.01022 | 1.29442  |
| 3.681072       | 0.055033 | -0.09711 | 3.714312       | 0.053948 | -0.12036 | 6.768908 | 0.009276 | -0.15592 | 0.830872 |
| 1.10059        | 0.294137 | -0.03656 | 0.355226       | 0.55117  | -0.02573 | 5.122332 | 0.02362  | -0.09356 | 6.26129  |
| 1.10059        | 0.294137 | -0.03656 | 0.355226       | 0.55117  | -0.02573 | 5.122332 | 0.02362  | -0.09356 | 6.26129  |
| 2.970714       | 0.084784 | 0.431575 | 0.000626       | 0.980039 | 0.007731 | 0.025016 | 0.874327 | 0.041864 | 0.865984 |
| 1.634076       | 0.20114  | -0.96338 | 0.015466       | 0.901028 | 0.115534 | 0.531784 | 0.465858 | 0.50343  | 0.228798 |
| 0.699624       | 0.40291  | 0.177316 | 0.037474       | 0.846503 | 0.050472 | 0.730326 | 0.392778 | -0.22692 | 0.546516 |
| 0.764496       | 0.381925 | 0.030082 | 0.089962       | 0.764226 | 0.012828 | 2.279494 | 0.131095 | 0.061957 | 4.00768  |
| 3.948558       | 0.046912 | -0.09923 | 4.2064         | 0.040272 | -0.1264  | 6.804564 | 0.009092 | -0.15449 | 0.534546 |
| 0.334956       | 0.562755 | 0.131772 | 0.639868       | 0.423759 | -0.22545 | 0.03105  | 0.860129 | 0.042447 | 0.34241  |
| 0.695546       | 0.404284 | -0.13632 | 2.385782       | 0.122444 | -0.30807 | 0.079428 | 0.778074 | -0.05287 | 0.206038 |
| 3.108246       | 0.077897 | -0.49381 | 1.507556       | 0.219512 | -0.41839 | 0.085744 | 0.769659 | -0.10536 | 0.01371  |
| 4.68795        | 0.030375 | -0.25099 | 7.33305        | 0.00677  | -0.38737 | 5.06581  | 0.024402 | -0.31289 | 2.32777  |
| 0.955806       | 0.328246 | -0.03452 | 1.106706       | 0.292799 | -0.04599 | 5.287264 | 0.021482 | -0.09592 | 5.48095  |
| 0.695546       | 0.404284 | -0.13632 | 2.385782       | 0.122444 | -0.30805 | 0.079428 | 0.778074 | -0.05287 | 0.206038 |

|          |          |          |          |          |          |          |          |          |          |
|----------|----------|----------|----------|----------|----------|----------|----------|----------|----------|
| 0.598874 | 0.439008 | 0.027148 | 0.672606 | 0.412145 | 0.035536 | 6.300528 | 0.01207  | 0.104565 | 5.746654 |
| 2.744982 | 0.09756  | -0.05772 | 3.87673  | 0.04896  | -0.08491 | 9.656734 | 0.001887 | -0.12815 | 6.487098 |
| 0.222412 | 0.637208 | 0.016725 | 0.09895  | 0.753093 | 0.013781 | 4.688066 | 0.030373 | 0.091003 | 4.280536 |
| 0.094986 | 0.757932 | -0.01084 | 1.20327  | 0.272669 | -0.04781 | 6.417694 | 0.011299 | -0.1066  | 8.313448 |
| 1.11681  | 0.290606 | -0.05533 | 0.172702 | 0.677721 | -0.02666 | 0.914254 | 0.338988 | -0.05906 | 0.00268  |
| 7.605184 | 0.00582  | -0.19562 | 4.185222 | 0.040778 | -0.17897 | 3.558896 | 0.059227 | -0.16097 | 0.075574 |
| 1.974256 | 0.159997 | 0.053295 | 0.28209  | 0.595335 | 0.024921 | 0.563254 | 0.452952 | -0.03415 | 3.516204 |
| 1.586312 | 0.207854 | -0.04348 | 3.894288 | 0.048451 | -0.08407 | 8.927476 | 0.002809 | -0.12238 | 3.396316 |
| 6.338866 | 0.011812 | -0.16427 | 3.86821  | 0.049209 | -0.15902 | 3.88216  | 0.048802 | -0.15543 | 0.020944 |
| 0.018232 | 0.892591 | 0.004734 | 1.077558 | 0.299245 | -0.04508 | 4.115214 | 0.042499 | -0.08554 | 4.49998  |
| 0.039916 | 0.841645 | -0.0197  | 0.053046 | 0.817845 | 0.028198 | 0.001622 | 0.967875 | 0.004859 | 0.258882 |
| 9.764144 | 0.00178  | -0.1352  | 4.698756 | 0.030184 | -0.11633 | 3.029296 | 0.081773 | -0.09087 | 1.76711  |
| 9.764144 | 0.00178  | -0.13519 | 4.698756 | 0.030184 | -0.11633 | 2.778838 | 0.095517 | -0.08701 | 1.76711  |
| 8.143652 | 0.004321 | -0.12105 | 3.482192 | 0.062032 | -0.09816 | 2.660854 | 0.102846 | -0.08373 | 1.289348 |
| 1.992388 | 0.158091 | -0.06662 | 1.293474 | 0.255409 | -0.0666  | 0.035946 | 0.849627 | -0.01057 | 0.401558 |
| 4.385196 | 0.036252 | -0.08935 | 3.505    | 0.061184 | -0.09894 | 0.892412 | 0.344824 | -0.04816 | 0.091806 |
| 0.13477  | 0.713537 | 0.024272 | 0.736438 | 0.390804 | 0.070707 | 0.892664 | 0.344756 | 0.074855 | 0.017074 |
| 0.399724 | 0.527232 | -0.03624 | 1.398996 | 0.236892 | -0.08391 | 2.988648 | 0.08385  | -0.11861 | 0.760534 |
| 5.145892 | 0.023301 | -0.10059 | 4.529016 | 0.033325 | -0.11695 | 0.621882 | 0.430349 | -0.0417  | 0.187824 |
| 0.000166 | 0.98972  | -0.00176 | 0.021648 | 0.883027 | -0.02508 | 0.63241  | 0.426473 | -0.13254 | 0.09753  |
| 0.44777  | 0.503396 | -0.08692 | 1.959052 | 0.161615 | -0.22673 | 0.00125  | 0.971796 | -0.00527 | 0.08011  |
| 0.272852 | 0.601425 | -0.03336 | 0.233228 | 0.629141 | -0.03836 | 0.243716 | 0.621535 | 0.037771 | 1.696728 |
| 0.765894 | 0.38149  | -0.1162  | 2.709184 | 0.099772 | -0.27285 | 0.027112 | 0.869214 | 0.024923 | 0.17501  |
| 1.13084  | 0.287596 | 0.224909 | 0.4829   | 0.487112 | 0.181298 | 0.519026 | 0.471257 | 0.15345  | 1.567602 |
| 0.01205  | 0.91259  | -0.00831 | 0.000042 | 0.994829 | 0.000603 | 1.122076 | 0.289472 | -0.09777 | 0.837114 |
| 0.36922  | 0.54343  | -0.04789 | 0.36034  | 0.548318 | -0.05857 | 1.630716 | 0.201604 | -0.12264 | 0.261302 |
| 4.31882  | 0.037693 | 0.247938 | 3.023982 | 0.082042 | 0.259192 | 1.818468 | 0.177496 | 0.197109 | 0.009728 |
| 5.60261  | 0.017934 | 0.216653 | 9.928672 | 0.001627 | 0.360544 | 1.617252 | 0.203475 | 0.140431 | 0.301848 |
| 3.572642 | 0.058739 | -0.28055 | 6.142102 | 0.0132   | -0.45473 | 2.983998 | 0.084091 | -0.30248 | 2.704452 |
| 0.643886 | 0.422307 | -0.05947 | 0.70029  | 0.402686 | -0.07728 | 0.386264 | 0.53427  | -0.05564 | 0.324468 |
| 0.416172 | 0.518853 | -0.04809 | 0.010364 | 0.918913 | -0.00945 | 0.2974   | 0.585517 | -0.04953 | 0.65618  |
| 0.56464  | 0.452397 | -0.05532 | 0.000478 | 0.982557 | 0.002002 | 0.650474 | 0.419943 | -0.07245 | 0.03386  |
| 0.018526 | 0.891734 | 0.023194 | 0.06301  | 0.8018   | 0.052582 | 0.047944 | 0.82668  | 0.043677 | 0.965214 |
| 0.046592 | 0.829103 | 0.036387 | 0.002772 | 0.958011 | 0.010902 | 0.09997  | 0.751866 | 0.062439 | 1.437318 |
| 0.00008  | 0.992864 | 0.001451 | 0.198646 | 0.655816 | -0.08511 | 0.113658 | 0.736017 | -0.05985 | 0.064528 |
| 2.567928 | 0.10905  | 0.122026 | 5.705462 | 0.016912 | 0.224315 | 3.520718 | 0.060606 | 0.169925 | 0.079292 |
| 0.193104 | 0.660346 | 0.046487 | 0.424824 | 0.51454  | 0.085443 | 1.97502  | 0.159916 | 0.180755 | 0.151322 |
| 1.88157  | 0.170156 | 0.401554 | 0.811264 | 0.367747 | 0.325267 | 0.075504 | 0.783485 | -0.08718 | 1.307244 |
| 0.317518 | 0.573103 | 0.045123 | 5.9801   | 0.014468 | 0.243656 | 2.643404 | 0.103981 | 0.154704 | 0.701036 |
| 2.328434 | 0.12703  | 0.115863 | 5.677192 | 0.017187 | 0.223127 | 3.924058 | 0.0476   | 0.17898  | 0.081258 |
| 0.129462 | 0.71899  | 0.029565 | 1.129956 | 0.287785 | 0.109157 | 0.439942 | 0.50715  | 0.066881 | 3.026808 |
| 1.314822 | 0.251524 | -0.08048 | 3.046946 | 0.080889 | -0.15106 | 1.994552 | 0.157866 | -0.11877 | 0.06201  |
| 1.599144 | 0.206025 | -0.08212 | 3.949622 | 0.046882 | -0.15974 | 2.99295  | 0.083628 | -0.13559 | 0.055182 |
| 1.89059  | 0.169135 | -0.19877 | 2.861036 | 0.090749 | -0.30215 | 1.330396 | 0.248735 | -0.1946  | 0.6383   |
| 1.403184 | 0.236191 | 0.049928 | 0.036604 | 0.848274 | 0.009989 | 0.26264  | 0.608312 | 0.025909 | 0.37035  |
| 0.002038 | 0.963992 | -0.00202 | 0.419244 | 0.517315 | -0.03577 | 0.05677  | 0.811676 | 0.012849 | 0.05634  |
| 0.002038 | 0.963992 | -0.00202 | 0.419244 | 0.517315 | -0.03577 | 0.05677  | 0.811676 | 0.012849 | 0.05634  |

|          |          |          |          |          |          |          |          |          |          |
|----------|----------|----------|----------|----------|----------|----------|----------|----------|----------|
| 2.0459   | 0.152617 | -0.05782 | 0.2961   | 0.586338 | -0.0273  | 0.109132 | 0.741135 | -0.01604 | 0.405368 |
| 0.105564 | 0.745252 | -0.08786 | 0.094346 | 0.758723 | -0.10677 | 0.433502 | 0.510276 | -0.20405 | 0.013588 |
| 1.718228 | 0.189921 | -0.05289 | 0.199534 | 0.655097 | -0.02238 | 0.015444 | 0.901098 | 0.00603  | 0.056998 |
| 0.879414 | 0.348362 | 0.036834 | 0.008598 | 0.926122 | 0.004512 | 0.79023  | 0.374031 | 0.041893 | 0.62213  |
| 3.68732  | 0.054828 | -0.07477 | 0.699824 | 0.402843 | -0.04047 | 0.108442 | 0.741925 | 0.015444 | 0.014638 |
| 0.599104 | 0.43892  | 0.027467 | 0.03162  | 0.858864 | 0.007842 | 1.446746 | 0.229051 | -0.05068 | 0.33919  |
| 0.333068 | 0.563858 | 0.031848 | 0.357036 | 0.550157 | 0.040738 | 1.020932 | 0.312298 | 0.067042 | 0.561166 |
| 0.384466 | 0.535223 | 0.03517  | 0.20937  | 0.647262 | 0.032076 | 1.033508 | 0.309336 | 0.069034 | 0.544484 |
| 2.66141  | 0.10281  | 0.064826 | 0.388586 | 0.533044 | 0.030743 | 1.749532 | 0.185936 | 0.06296  | 2.283488 |
| 0.000212 | 0.988383 | -0.00056 | 0.0195   | 0.888942 | 0.006176 | 0.938376 | 0.332696 | -0.04079 | 0.255884 |
| 0.152696 | 0.695972 | 0.01573  | 0.628872 | 0.427769 | 0.039887 | 0.044118 | 0.833634 | 0.010116 | 0.12705  |
| 0.047852 | 0.826844 | 0.011923 | 0.021874 | 0.882423 | 0.009998 | 1.412804 | 0.234592 | 0.078272 | 0.447616 |
| 2.420776 | 0.119736 | 0.07523  | 1.219254 | 0.269507 | 0.066188 | 2.17007  | 0.14072  | 0.084867 | 0.070028 |
| 1.081464 | 0.29837  | -0.36159 | 1.431628 | 0.231499 | -0.51196 | 0.051706 | 0.820121 | 0.102026 | 1.262504 |
| 4.383454 | 0.036289 | 0.160486 | 2.806514 | 0.093882 | 0.15794  | 0.371618 | 0.542124 | 0.055275 | 1.512956 |
| 1.31785  | 0.250978 | 0.045936 | 0.000346 | 0.985159 | 0.000921 | 1.595296 | 0.206571 | 0.060712 | 0.619154 |
| 0.04729  | 0.827848 | -0.01203 | 0.980756 | 0.322012 | -0.06799 | 0.015314 | 0.901513 | 0.008246 | 0.063266 |
| 0.078438 | 0.779425 | 0.015722 | 0.637984 | 0.424442 | -0.05557 | 0.002572 | 0.959553 | -0.00343 | 0.201152 |
| 0.07844  | 0.779423 | 0.01572  | 0.637982 | 0.424443 | -0.05556 | 0.002572 | 0.959553 | -0.00343 | 0.201152 |
| 0.722654 | 0.395275 | -0.03064 | 0.007426 | 0.931328 | -0.00386 | 0.401448 | 0.526342 | 0.027566 | 1.2717   |
| 0.272    | 0.601993 | -0.01861 | 0.07965  | 0.777772 | 0.012514 | 0.62045  | 0.43088  | 0.033959 | 0.89137  |
| 3.36987  | 0.066399 | 0.066879 | 1.530532 | 0.216033 | 0.055944 | 2.05885  | 0.151324 | 0.06222  | 0.009356 |
| 2.189906 | 0.138918 | -0.06872 | 0.960304 | 0.32711  | -0.0564  | 4.147426 | 0.041698 | -0.11256 | 3.113698 |
| 1.391326 | 0.238181 | -0.04646 | 1.958728 | 0.161649 | -0.06871 | 5.761672 | 0.01638  | -0.11301 | 1.30004  |
| 0.04948  | 0.823971 | 0.012065 | 0.00574  | 0.939608 | 0.005107 | 2.03405  | 0.15381  | 0.092655 | 0.203352 |
| 0.01282  | 0.909852 | -0.00698 | 0.784314 | 0.375825 | 0.068047 | 0.474606 | 0.490876 | 0.051103 | 0.161502 |
| 5.373602 | 0.020444 | 0.096971 | 0.909622 | 0.340215 | 0.049278 | 0.089576 | 0.764717 | 0.014748 | 0.35338  |
| 0.055138 | 0.814353 | -0.01116 | 0.488066 | 0.484791 | 0.041232 | 0.02315  | 0.879068 | 0.008745 | 0.075178 |

| HOMA-β   |          |
|----------|----------|
| p(SNP)   | bSNP     |
| 0.964329 | -0.00187 |
| 0.697656 | -0.01422 |
| 0.725669 | -0.01289 |
| 0.948809 | 0.002389 |
| 0.88179  | 0.006176 |
| 0.826208 | -0.00855 |
| 0.760975 | -0.01535 |
| 0.881975 | 0.010833 |
| 0.933379 | -0.00307 |
| 0.516368 | -0.5241  |
| 0.850939 | -0.00693 |
| 0.807774 | -0.01238 |
| 0.817515 | 0.00992  |
| 0.539582 | 0.024177 |
| 0.680345 | -0.01518 |
| 0.843774 | -0.00727 |
| 0.756853 | -0.0157  |
| 0.807774 | -0.01238 |
| 0.67845  | 0.02825  |
| 0.850939 | -0.00693 |
| 0.880759 | 0.006392 |
| 0.453649 | 0.028344 |
| 0.526962 | -0.02932 |
| 0.383521 | 0.039826 |
| 0.614581 | -0.0234  |
| 0.778867 | 0.023182 |
| 0.549149 | -0.02801 |
| 0.242009 | 0.046437 |
| 0.255235 | 0.045856 |
| 0.362021 | 0.047999 |
| 0.01234  | 0.090873 |
| 0.01234  | 0.090876 |
| 0.352069 | -0.24882 |
| 0.632417 | 0.383864 |
| 0.459745 | -0.16514 |
| 0.045293 | -0.07202 |
| 0.464702 | 0.038032 |
| 0.558441 | -0.14222 |
| 0.649891 | -0.0774  |
| 0.906789 | -0.03386 |
| 0.127084 | 0.185959 |
| 0.019225 | 0.085972 |
| 0.649891 | -0.0774  |

|          |          |
|----------|----------|
| 0.01652  | -0.08781 |
| 0.010866 | 0.092421 |
| 0.038551 | -0.07661 |
| 0.003935 | 0.105426 |
| 0.958713 | -0.00278 |
| 0.783388 | -0.02032 |
| 0.060771 | 0.07454  |
| 0.065342 | 0.066323 |
| 0.884932 | -0.00985 |
| 0.033895 | 0.077627 |
| 0.610889 | -0.05324 |
| 0.18374  | 0.060332 |
| 0.18374  | 0.060331 |
| 0.256168 | 0.050617 |
| 0.526286 | -0.03138 |
| 0.761894 | -0.01358 |
| 0.896038 | 0.009106 |
| 0.383161 | -0.05273 |
| 0.664734 | -0.02018 |
| 0.754814 | 0.0452   |
| 0.777148 | 0.038602 |
| 0.192716 | -0.08825 |
| 0.675697 | 0.058296 |
| 0.210556 | -0.28196 |
| 0.360223 | -0.07273 |
| 0.609227 | -0.0423  |
| 0.921432 | -0.01262 |
| 0.582726 | -0.05315 |
| 0.100069 | 0.259967 |
| 0.568935 | -0.0446  |
| 0.417912 | -0.06379 |
| 0.854005 | -0.01429 |
| 0.325877 | -0.17667 |
| 0.230574 | -0.21262 |
| 0.799477 | -0.04176 |
| 0.778259 | -0.02255 |
| 0.697275 | 0.043581 |
| 0.252894 | -0.3567  |
| 0.402436 | -0.07082 |
| 0.7756   | -0.02278 |
| 0.081899 | -0.1516  |
| 0.803347 | -0.0183  |
| 0.81428  | 0.01603  |
| 0.424327 | 0.122755 |
| 0.542813 | -0.02701 |
| 0.812377 | 0.011146 |
| 0.812377 | 0.011146 |



|          |          |
|----------|----------|
| 0.52433  | 0.02701  |
| 0.907203 | -0.03379 |
| 0.811305 | 0.010137 |
| 0.430257 | -0.03263 |
| 0.903701 | -0.00495 |
| 0.560297 | 0.021668 |
| 0.453791 | 0.043448 |
| 0.46058  | 0.043937 |
| 0.130757 | -0.06341 |
| 0.612962 | 0.018885 |
| 0.721511 | -0.01523 |
| 0.503469 | 0.038763 |
| 0.791296 | -0.01348 |
| 0.261178 | -0.41501 |
| 0.218689 | -0.09807 |
| 0.431362 | -0.03307 |
| 0.801406 | -0.01475 |
| 0.653793 | -0.02662 |
| 0.653793 | -0.02662 |
| 0.259448 | -0.04306 |
| 0.345106 | -0.03565 |
| 0.922944 | 0.003706 |
| 0.077636 | 0.085422 |
| 0.254206 | 0.047118 |
| 0.652029 | 0.025968 |
| 0.687777 | 0.026355 |
| 0.552206 | 0.025862 |
| 0.783942 | -0.01376 |

SUPPLEMENTARY TABLE 2

| No | SNP       | Ever T2D |        |         |        | Incident T2D |        |         |        |
|----|-----------|----------|--------|---------|--------|--------------|--------|---------|--------|
|    |           | age_b    | age_p  | sex_b   | sex_p  | age_b        | age_p  | sex_b   | sex_p  |
| 1  | rs1001646 | -0.1196  | 0.2453 | -0.0929 | 0.3929 | -0.1712      | 0.2530 | 0.0777  | 0.5603 |
| 2  | rs1010718 | 4.7076   | 0.0645 | 4.3590  | 0.5855 | -0.9347      | 1.0000 | 4.1068  | 0.1199 |
| 3  | rs1028294 | -0.1668  | 0.3076 | 0.2525  | 0.1105 | -0.2591      | 0.2760 | 0.4134  | 0.0383 |
| 4  | rs1050529 | -0.1086  | 0.3391 | -0.0377 | 0.7306 | -0.2251      | 0.1617 | -0.0746 | 0.6106 |
| 5  | rs1050529 | -0.0444  | 0.7294 | 0.0414  | 0.7518 | 0.0465       | 0.8163 | 0.3306  | 0.0595 |
| 6  | rs1050530 | -0.2415  | 0.1711 | -0.0488 | 0.6957 | -0.7281      | 0.0103 | 0.0096  | 0.9293 |
| 7  | rs1050531 | 0.0770   | 0.6052 | 0.0912  | 0.5388 | 0.2544       | 0.2590 | 0.4764  | 0.0199 |
| 8  | rs1050531 | 0.0374   | 0.8121 | 0.0439  | 0.7739 | 0.2148       | 0.3709 | 0.3648  | 0.0960 |
| 9  | rs1050531 | -0.1209  | 0.5229 | 0.1792  | 0.3597 | 0.0886       | 0.7558 | 0.5027  | 0.0477 |
| 10 | rs1155847 | 0.0219   | 0.8516 | -0.1052 | 0.3912 | 0.2145       | 0.2278 | -0.4132 | 0.0127 |
| 11 | rs1177820 | -0.1799  | 0.3531 | 0.2213  | 0.2779 | 0.1352       | 0.6330 | 0.5458  | 0.0297 |
| 12 | rs1178113 | -0.1541  | 0.4757 | 0.1187  | 0.6245 | 0.1563       | 0.6144 | 0.4560  | 0.0982 |
| 13 | rs1178151 | -0.0326  | 0.8708 | 0.1378  | 0.4990 | 0.1684       | 0.5597 | 0.5983  | 0.0219 |
| 14 | rs1198590 | -0.2545  | 0.0180 | 0.1110  | 0.3525 | -0.5061      | 0.0015 | 0.0685  | 0.7126 |
| 15 | rs1198617 | 0.1527   | 0.8331 | 0.5926  | 0.3778 | -0.3390      | 1.0000 | 4.4948  | 0.0510 |
| 16 | rs1199035 | -0.6386  | 0.0388 | -0.1995 | 0.5063 | -0.7403      | 0.1444 | -0.1265 | 0.8459 |
| 17 | rs1267999 | 0.3819   | 0.3403 | -0.6330 | 0.1921 | 4.7360       | 0.0106 | -4.9665 | 0.1062 |
| 18 | rs1268204 | -0.0237  | 0.8683 | -0.1177 | 0.4117 | -0.0924      | 0.6712 | -0.1678 | 0.4050 |
| 19 | rs1326663 | 0.1172   | 0.3492 | -0.0363 | 0.7957 | 0.3481       | 0.0552 | -0.2696 | 0.1225 |
| 20 | rs1326985 | -0.0191  | 0.8988 | -0.1551 | 0.3258 | 0.2331       | 0.2836 | 0.0327  | 0.8683 |
| 21 | rs1348794 | 0.0314   | 0.8162 | -0.2577 | 0.0535 | 0.2380       | 0.2320 | -0.0545 | 0.7600 |
| 22 | rs1374295 | 0.0428   | 0.7207 | 0.0777  | 0.5135 | 0.2568       | 0.1558 | 0.0188  | 0.9794 |
| 23 | rs1394874 | -0.1631  | 0.2092 | 0.0150  | 0.8841 | -0.0864      | 0.6662 | 0.2151  | 0.2089 |
| 24 | rs1394875 | -0.2091  | 0.1467 | 0.0685  | 0.6806 | -0.0871      | 0.6973 | 0.2806  | 0.1453 |
| 25 | rs1446534 | -0.0337  | 0.7670 | 0.0095  | 0.9450 | -0.0270      | 0.8694 | -0.0328 | 0.8282 |
| 26 | rs1446538 | 0.0619   | 0.5743 | 0.2440  | 0.0230 | 0.0541       | 0.7475 | 0.2273  | 0.1261 |
| 27 | rs1499430 | 0.1240   | 0.4132 | -0.1941 | 0.2111 | 0.5130       | 0.0154 | -0.0013 | 0.9011 |
| 28 | rs1505521 | -0.3458  | 0.0855 | -0.0437 | 0.7557 | -0.5846      | 0.0786 | -0.0884 | 0.9197 |
| 29 | rs1578978 | -0.1032  | 0.3313 | 0.0798  | 0.4786 | -0.0384      | 0.8069 | 0.1001  | 0.4780 |
| 30 | rs1584217 | -0.0110  | 0.9304 | -0.1803 | 0.1528 | -0.2290      | 0.2328 | -0.0723 | 0.6485 |
| 31 | rs1584220 | -0.0518  | 0.7202 | -0.1307 | 0.3576 | -0.0874      | 0.6889 | -0.2102 | 0.3033 |
| 32 | rs1688924 | 5.9225   | 0.1630 | -1.7808 | 1.0000 | 0.8845       | 0.9594 | 0.9521  | 0.8452 |
| 33 | rs1688926 | 0.0238   | 0.8197 | -0.1448 | 0.1700 | -0.2553      | 0.1047 | -0.1288 | 0.3570 |
| 34 | rs1688929 | 0.0132   | 0.9083 | -0.0285 | 0.8066 | -0.0636      | 0.7036 | -0.0505 | 0.7500 |
| 35 | rs1688940 | -0.1297  | 0.3396 | 0.0047  | 0.9872 | -0.0050      | 0.9844 | 0.1991  | 0.2833 |
| 36 | rs1688941 | 0.6074   | 0.3148 | 0.0901  | 0.9235 | -1.1188      | 0.5444 | 3.4637  | 0.2848 |
| 37 | rs1688943 | 0.6075   | 0.3137 | 0.0804  | 0.9112 | -1.0820      | 0.5645 | 3.3236  | 0.2948 |
| 38 | rs1688943 | 0.3989   | 0.4707 | -0.0413 | 0.7009 | -0.9670      | 0.9956 | 3.4762  | 0.2237 |
| 39 | rs1688944 | 0.6619   | 0.1636 | -0.5763 | 0.3283 | 0.3142       | 0.7011 | -0.3034 | 0.7976 |
| 40 | rs1688946 | -4.2561  | 0.2913 | -3.4605 | 0.4135 | 1.0925       | 0.9975 | 1.3100  | 0.9968 |
| 41 | rs1688946 | -0.2156  | 0.2009 | 0.0780  | 0.6410 | -0.5132      | 0.0484 | 0.1068  | 0.4967 |
| 42 | rs1773821 | -0.1651  | 0.6123 | 0.4878  | 0.1290 | -0.7534      | 0.1625 | 0.8446  | 0.0517 |
| 43 | rs1774452 | -0.0343  | 0.8131 | -0.1472 | 0.3078 | -0.0116      | 0.9493 | -0.2614 | 0.2082 |
| 44 | rs1774549 | 0.3925   | 0.7149 | -1.7838 | 0.3268 | 1.4329       | 0.9647 | 1.6131  | 0.9316 |

|    |           |         |        |         |        |         |        |         |        |
|----|-----------|---------|--------|---------|--------|---------|--------|---------|--------|
| 45 | rs1781354 | -0.1703 | 0.1393 | -0.0282 | 0.7561 | -0.2572 | 0.1190 | -0.1475 | 0.3278 |
| 46 | rs1995222 | 0.1516  | 0.1757 | 0.0545  | 0.6092 | 0.3569  | 0.0298 | 0.0201  | 0.8747 |
| 47 | rs2047962 | -0.0316 | 0.7663 | -0.0892 | 0.4070 | -0.1321 | 0.3760 | -0.0641 | 0.6446 |
| 48 | rs2062947 | 0.1349  | 0.4627 | -0.5588 | 0.0038 | 0.0667  | 0.7936 | -0.3564 | 0.1413 |
| 49 | rs2464577 | 0.1009  | 0.5724 | 0.0406  | 0.8307 | 0.0085  | 0.9733 | 0.1717  | 0.4927 |
| 50 | rs2464592 | 0.0293  | 0.8049 | -0.1066 | 0.3754 | -0.1385 | 0.4401 | 0.0859  | 0.6125 |
| 51 | rs2466291 | -0.0014 | 0.9893 | -0.0162 | 0.8840 | -0.0513 | 0.7624 | 0.2054  | 0.1815 |
| 52 | rs2466293 | -0.0548 | 0.5996 | 0.0108  | 0.9412 | 0.0031  | 0.9825 | 0.0080  | 0.9531 |
| 53 | rs2466295 | 0.0374  | 0.7447 | 0.0036  | 0.9732 | -0.2136 | 0.2090 | 0.1504  | 0.3518 |
| 54 | rs2466296 | -0.0417 | 0.7522 | 0.0184  | 0.8945 | -0.1631 | 0.4037 | 0.1287  | 0.4695 |
| 55 | rs2466299 | -0.0307 | 0.8164 | 0.0106  | 0.9403 | -0.1538 | 0.4318 | 0.1157  | 0.5160 |
| 56 | rs2466315 | 0.1009  | 0.5724 | 0.0406  | 0.8307 | 0.0085  | 0.9733 | 0.1717  | 0.4927 |
| 57 | rs2466316 | 0.1436  | 0.4111 | -0.0058 | 0.9764 | 0.0921  | 0.7153 | 0.0756  | 0.7455 |
| 58 | rs2466318 | -0.0033 | 0.9772 | -0.0128 | 0.9093 | -0.2735 | 0.1146 | 0.1383  | 0.3663 |
| 59 | rs2649098 | 0.0856  | 0.5351 | -0.0709 | 0.6108 | 0.1829  | 0.3732 | -0.0160 | 0.9367 |
| 60 | rs2921722 | -0.0448 | 0.6583 | -0.0362 | 0.7129 | 0.0608  | 0.6846 | 0.0690  | 0.6091 |
| 61 | rs2921739 | 0.0474  | 0.6531 | -0.1419 | 0.1851 | -0.2291 | 0.1453 | -0.1073 | 0.4267 |
| 62 | rs2921752 | 0.1911  | 0.3510 | 0.2353  | 0.3169 | -0.0880 | 0.7800 | -0.1267 | 0.6830 |
| 63 | rs2921755 | 0.0052  | 0.9599 | -0.0525 | 0.6226 | -0.2266 | 0.1511 | -0.0107 | 0.9170 |
| 64 | rs2938860 | 0.0472  | 0.7480 | 0.1380  | 0.3479 | 0.1818  | 0.3997 | 0.2821  | 0.1583 |
| 65 | rs2938864 | -0.0770 | 0.4463 | -0.0399 | 0.7150 | -0.0177 | 0.9043 | 0.0684  | 0.6189 |
| 66 | rs3019880 | 0.0674  | 0.5197 | -0.0281 | 0.7865 | 0.0779  | 0.6174 | -0.1525 | 0.2849 |
| 67 | rs3019889 | -0.1249 | 0.4998 | 0.0565  | 0.7951 | -0.2124 | 0.4767 | -0.4031 | 0.1422 |
| 68 | rs3020106 | -0.0362 | 0.8103 | -0.1533 | 0.3343 | 0.2397  | 0.2711 | 0.0523  | 0.7929 |
| 69 | rs3020108 | -0.0450 | 0.6572 | -0.0364 | 0.7118 | 0.0608  | 0.6846 | 0.0690  | 0.6091 |
| 70 | rs3020116 | 0.1297  | 0.2013 | 0.0153  | 0.8295 | -0.0201 | 0.8897 | -0.1570 | 0.2501 |
| 71 | rs3020119 | 0.0292  | 0.7776 | -0.0339 | 0.7463 | 0.0238  | 0.8757 | -0.1975 | 0.1635 |
| 72 | rs3020156 | 0.0579  | 0.5853 | -0.1769 | 0.1004 | -0.2590 | 0.1048 | -0.1415 | 0.3239 |
| 73 | rs3020164 | 0.0243  | 0.8164 | -0.1461 | 0.1671 | -0.2542 | 0.1068 | -0.1282 | 0.3594 |
| 74 | rs3020167 | 0.0430  | 0.7049 | -0.0784 | 0.4837 | -0.2533 | 0.1390 | -0.0371 | 0.8595 |
| 75 | rs3020168 | 0.0400  | 0.7022 | -0.1497 | 0.1579 | -0.2397 | 0.1280 | -0.1546 | 0.2800 |
| 76 | rs3020172 | 0.1754  | 0.3552 | 0.2561  | 0.2140 | -0.1564 | 0.5862 | 0.0872  | 0.6791 |
| 77 | rs3020176 | 0.0055  | 0.9676 | -0.2314 | 0.0813 | 0.2485  | 0.2126 | -0.0473 | 0.7914 |
| 78 | rs3020178 | 0.0464  | 0.7159 | -0.0801 | 0.5358 | 0.2346  | 0.2036 | 0.0002  | 0.9254 |
| 79 | rs3020180 | 0.0227  | 0.8665 | -0.2580 | 0.0552 | 0.2367  | 0.2374 | -0.0600 | 0.7341 |
| 80 | rs3590145 | 0.0000  | 1.0000 | -0.1843 | 1.0000 | 0.0000  | 1.0000 | 1.2503  | 0.8824 |
| 81 | rs3802177 | 0.0817  | 0.5147 | -0.0834 | 0.5213 | 0.3217  | 0.0813 | -0.3710 | 0.0317 |
| 82 | rs4319130 | -0.0501 | 0.7293 | -0.1294 | 0.3636 | -0.0874 | 0.6889 | -0.2102 | 0.3033 |
| 83 | rs4617186 | -0.2209 | 0.0700 | -0.0891 | 0.4292 | -0.3181 | 0.0891 | -0.0860 | 0.5895 |
| 84 | rs6469667 | -0.1080 | 0.2960 | -0.0531 | 0.6175 | -0.0531 | 0.7213 | -0.0045 | 0.9707 |
| 85 | rs6469668 | -0.0667 | 0.5232 | -0.0571 | 0.5976 | -0.0664 | 0.6490 | -0.0743 | 0.5909 |
| 86 | rs6469674 | -0.2354 | 0.2237 | -0.0010 | 0.9352 | -0.2729 | 0.3717 | 0.1193  | 0.6039 |
| 87 | rs6469675 | -0.0506 | 0.6870 | 0.0479  | 0.7058 | 0.0381  | 0.8437 | 0.3659  | 0.0279 |
| 88 | rs6469681 | -0.1375 | 0.3076 | 0.0182  | 0.9035 | -0.3751 | 0.0642 | 0.1742  | 0.2970 |
| 89 | rs6982630 | -0.0070 | 0.9677 | 0.0597  | 0.7296 | 0.2796  | 0.2926 | 0.3770  | 0.1209 |
| 90 | rs6984532 | 0.1462  | 0.8612 | 0.5744  | 0.4354 | -0.2619 | 1.0000 | 4.3951  | 0.1017 |
| 91 | rs6997684 | -0.1358 | 0.2050 | 0.0078  | 0.9632 | -0.1095 | 0.4881 | 0.0747  | 0.6111 |

|     |           |         |        |         |        |         |        |         |        |
|-----|-----------|---------|--------|---------|--------|---------|--------|---------|--------|
| 92  | rs6998120 | 0.1439  | 0.5136 | -0.2744 | 0.2352 | 0.0701  | 0.8396 | 0.1105  | 0.6915 |
| 93  | rs6999383 | 1.1650  | 0.9094 | 1.6044  | 1.0000 | 1.4726  | 0.9404 | 0.4056  | 0.9782 |
| 94  | rs6999899 | -0.1037 | 0.4230 | 0.0231  | 0.8468 | -0.0795 | 0.6876 | 0.2476  | 0.1467 |
| 95  | rs7000505 | -0.0876 | 0.5085 | 0.0137  | 0.9312 | 0.0556  | 0.7900 | 0.2447  | 0.1842 |
| 96  | rs7004119 | 0.2229  | 0.5588 | 0.0565  | 0.9190 | 0.2749  | 0.6393 | 0.4384  | 0.4097 |
| 97  | rs7005140 | 0.1042  | 0.3505 | 0.0283  | 0.7901 | 0.3428  | 0.0348 | -0.0585 | 0.7258 |
| 98  | rs7011057 | -0.1551 | 0.2328 | 0.0359  | 0.7617 | -0.0938 | 0.6373 | 0.2247  | 0.1904 |
| 99  | rs7016307 | 0.8845  | 1.0000 | 0.4158  | 0.9984 | 1.6675  | 0.9066 | 0.3543  | 0.9657 |
| 100 | rs720131  | -0.0210 | 0.8419 | -0.0189 | 0.8505 | -0.1840 | 0.2435 | -0.0030 | 0.9630 |
| 101 | rs720132  | -0.0294 | 0.8048 | 0.1038  | 0.3692 | 0.0258  | 0.8853 | 0.0354  | 0.8326 |
| 102 | rs720133  | 0.1158  | 0.2976 | 0.0270  | 0.8492 | 0.1710  | 0.2920 | -0.0074 | 0.9445 |
| 103 | rs7817754 | -0.2461 | 0.0879 | 0.1433  | 0.3751 | -0.0981 | 0.6499 | 0.3527  | 0.0610 |
| 104 | rs7826859 | 0.6489  | 0.3764 | 0.2931  | 0.7828 | -0.1639 | 1.0000 | 4.1928  | 0.0461 |
| 105 | rs7827401 | 0.0108  | 0.9547 | 0.2479  | 0.1979 | 0.2820  | 0.3219 | 0.6060  | 0.0220 |
| 106 | rs7828267 | -0.1954 | 0.2189 | 0.1211  | 0.4270 | -0.5927 | 0.0157 | 0.0231  | 0.6657 |
| 107 | rs7828477 | -0.0568 | 0.6550 | -0.1250 | 0.3300 | -0.2611 | 0.1813 | -0.0387 | 0.8330 |
| 108 | rs7831269 | -0.0672 | 0.7389 | 0.3486  | 0.0862 | 0.2645  | 0.3596 | 0.6560  | 0.0147 |
| 109 | rs7832958 | -0.2689 | 0.1662 | -0.0304 | 0.8169 | -0.2878 | 0.3463 | 0.1004  | 0.6530 |
| 110 | rs7833712 | 0.3987  | 0.3213 | -0.5836 | 0.2315 | 4.7176  | 0.0113 | -4.8235 | 0.1214 |
| 111 | rs7833734 | -0.1663 | 0.2305 | -0.0213 | 0.8558 | 0.0080  | 0.9689 | 0.2057  | 0.2815 |
| 112 | rs7840672 | 0.3928  | 0.4012 | -0.1904 | 0.6521 | 0.1889  | 0.8122 | -0.2350 | 0.8013 |
| 113 | rs7843159 | 0.7255  | 0.3177 | 0.3323  | 0.7319 | -0.1518 | 1.0000 | 4.0757  | 0.0420 |
| 114 | rs7843392 | 9.6567  | 0.0017 | -9.2169 | 0.2440 | 1.1060  | 0.9980 | 0.6444  | 0.9980 |
| 115 | rs868651  | -0.0649 | 0.6128 | 0.0365  | 0.7815 | 0.0391  | 0.8418 | 0.3326  | 0.0581 |
| 116 | rs958637  | 0.0229  | 0.9270 | 0.2865  | 0.2537 | -0.1087 | 0.7626 | 0.3691  | 0.2539 |
| 117 | rs961630  | 0.1274  | 0.2911 | -0.1497 | 0.2273 | 0.2111  | 0.2304 | -0.0537 | 0.7651 |
| 118 | rs9886445 | -0.2138 | 0.1811 | 0.1774  | 0.2315 | -0.5187 | 0.0340 | 0.1965  | 0.2302 |

| Fasting glucose |        |         |        | Fasting insulin |        |         |        | 2-hour  |        |
|-----------------|--------|---------|--------|-----------------|--------|---------|--------|---------|--------|
| age_b           | age_p  | sex_b   | sex_p  | age_b           | age_p  | sex_b   | sex_p  | age_b   | age_p  |
| 0.0381          | 0.5748 | 0.0882  | 0.1488 | 0.0695          | 0.4047 | -0.0100 | 0.8997 | 0.1063  | 0.1313 |
| -0.0511         | 0.9465 | -0.4980 | 0.2630 | 0.2519          | 0.7864 | 0.5983  | 0.2966 | 0.0177  | 0.9819 |
| -0.0448         | 0.6784 | -0.0713 | 0.4624 | -0.0075         | 0.9552 | -0.1372 | 0.2440 | -0.1764 | 0.1186 |
| -0.0031         | 0.9667 | 0.1274  | 0.0616 | 0.0262          | 0.7727 | -0.0845 | 0.3237 | 0.1183  | 0.1228 |
| 0.0471          | 0.5823 | -0.0442 | 0.5630 | 0.0790          | 0.4524 | 0.0820  | 0.3723 | 0.0459  | 0.6051 |
| -0.0318         | 0.7981 | 0.0611  | 0.5766 | 0.1406          | 0.3607 | 0.1193  | 0.3385 | -0.0347 | 0.7873 |
| 0.1110          | 0.2579 | -0.0641 | 0.4675 | -0.0205         | 0.8649 | -0.0191 | 0.8539 | 0.1491  | 0.1454 |
| 0.1456          | 0.1591 | -0.0818 | 0.4087 | -0.0236         | 0.8526 | 0.0425  | 0.7138 | 0.2035  | 0.0601 |
| 0.2936          | 0.0165 | 0.0050  | 0.7766 | -0.0329         | 0.8266 | -0.0822 | 0.5255 | 0.0972  | 0.4485 |
| 0.0104          | 0.8925 | -0.0103 | 0.8880 | -0.1103         | 0.2471 | 0.0482  | 0.6015 | -0.0186 | 0.8159 |
| 0.2395          | 0.0549 | -0.0048 | 0.8450 | -0.0838         | 0.5837 | -0.0924 | 0.4593 | 0.0740  | 0.5717 |
| 0.2185          | 0.1180 | 0.0506  | 0.5529 | -0.0658         | 0.7005 | -0.0218 | 0.8500 | 0.1040  | 0.4728 |
| 0.1430          | 0.2697 | 0.0924  | 0.3584 | -0.1148         | 0.4707 | -0.0238 | 0.8129 | 0.1050  | 0.4340 |
| 0.0436          | 0.5344 | -0.0540 | 0.4240 | 0.0958          | 0.2667 | -0.0352 | 0.7091 | 0.1005  | 0.1678 |
| -0.5846         | 0.4884 | 0.1694  | 0.5621 | 0.3970          | 0.7033 | 0.8560  | 0.1636 | -0.7747 | 0.3651 |
| 0.0549          | 0.7957 | 0.0934  | 0.6082 | 0.3600          | 0.1653 | 0.0120  | 0.9726 | -0.0243 | 0.9111 |
| 0.1309          | 0.6009 | -0.3419 | 0.1451 | 0.0490          | 0.8732 | 0.0335  | 0.9095 | 0.2974  | 0.2608 |
| -0.1508         | 0.1099 | 0.0354  | 0.7925 | 0.0982          | 0.3971 | 0.0179  | 0.8087 | -0.2404 | 0.0130 |
| 0.0388          | 0.6311 | -0.0128 | 0.8806 | -0.0860         | 0.3872 | -0.0136 | 0.8563 | -0.1099 | 0.1872 |
| 0.1004          | 0.2917 | -0.0128 | 0.8955 | 0.0566          | 0.6277 | 0.0999  | 0.3570 | -0.0199 | 0.8415 |
| -0.1047         | 0.2405 | 0.0752  | 0.3446 | 0.0089          | 0.9355 | -0.0553 | 0.5686 | -0.0338 | 0.7172 |
| 0.1649          | 0.0375 | -0.0175 | 0.7737 | -0.1261         | 0.1996 | -0.0066 | 0.9713 | -0.0087 | 0.9158 |
| 0.0948          | 0.2717 | -0.0757 | 0.3176 | 0.1274          | 0.2294 | 0.0194  | 0.8296 | -0.0487 | 0.5866 |
| 0.1544          | 0.1085 | -0.0035 | 0.9870 | 0.0782          | 0.5076 | 0.0276  | 0.7756 | -0.0197 | 0.8434 |
| -0.0316         | 0.6740 | 0.0764  | 0.2860 | -0.0440         | 0.6345 | -0.0418 | 0.5965 | 0.1247  | 0.1160 |
| 0.0191          | 0.7955 | -0.0621 | 0.3569 | -0.0142         | 0.8746 | -0.1307 | 0.1085 | 0.0646  | 0.3959 |
| -0.1536         | 0.1133 | 0.0472  | 0.6395 | 0.0656          | 0.5839 | 0.1114  | 0.2863 | 0.0724  | 0.4694 |
| -0.0792         | 0.5702 | -0.0146 | 0.9284 | 0.2306          | 0.1765 | 0.2559  | 0.1031 | -0.1246 | 0.3832 |
| 0.1134          | 0.1089 | -0.0433 | 0.5207 | 0.0545          | 0.5310 | 0.0153  | 0.8353 | 0.1378  | 0.0623 |
| 0.0554          | 0.5169 | 0.1039  | 0.1508 | -0.0922         | 0.3826 | 0.0570  | 0.5637 | 0.0539  | 0.5487 |
| -0.1568         | 0.0972 | 0.0388  | 0.7637 | 0.0817          | 0.4824 | 0.0170  | 0.8282 | -0.2323 | 0.0168 |
| -0.0643         | 1.0000 | 0.2115  | 1.0000 | -0.0710         | 1.0000 | 0.2685  | 1.0000 | 0.1624  | 1.0000 |
| -0.0101         | 0.8853 | 0.0913  | 0.1533 | 0.0568          | 0.5134 | 0.0200  | 0.7413 | 0.0122  | 0.8670 |
| -0.0363         | 0.6304 | 0.0764  | 0.2790 | 0.0030          | 0.9743 | -0.0542 | 0.5275 | 0.0770  | 0.3334 |
| 0.1231          | 0.1777 | -0.0528 | 0.5213 | 0.1042          | 0.3531 | 0.0676  | 0.5062 | 0.0479  | 0.6137 |
| 0.2920          | 0.5412 | 0.1959  | 0.6071 | 0.4827          | 0.4133 | 0.1663  | 0.7757 | -0.0179 | 0.9706 |
| 0.3537          | 0.4560 | 0.1495  | 0.7391 | 0.5038          | 0.3880 | 0.1585  | 0.8058 | 0.0054  | 0.9911 |
| 0.3646          | 0.3830 | 0.2432  | 0.5477 | 0.2271          | 0.6573 | 0.3836  | 0.3623 | 0.5731  | 0.1746 |
| -0.2185         | 0.4257 | 0.1039  | 0.7597 | -0.1709         | 0.6120 | 0.6487  | 0.0309 | 0.1035  | 0.7114 |
| -0.0056         | 0.9911 | 0.5968  | 0.2123 | -0.6897         | 0.2805 | 1.0419  | 0.0571 | 0.1509  | 0.7682 |
| 0.0095          | 0.9331 | -0.0617 | 0.5412 | -0.0773         | 0.5820 | -0.0324 | 0.8026 | -0.1149 | 0.3348 |
| -0.1149         | 0.5889 | -0.4034 | 0.0426 | -0.2332         | 0.3716 | -0.4761 | 0.0545 | -0.3073 | 0.1584 |
| -0.1567         | 0.0978 | 0.0489  | 0.6829 | 0.0712          | 0.5409 | 0.0170  | 0.8337 | -0.2419 | 0.0128 |
| 0.3045          | 0.7228 | 0.4120  | 0.5636 | -0.0267         | 0.9798 | 1.0117  | 0.1799 | 0.1785  | 0.8378 |

|         |        |         |        |         |        |         |        |         |        |
|---------|--------|---------|--------|---------|--------|---------|--------|---------|--------|
| -0.0159 | 0.8320 | -0.0004 | 0.9856 | -0.0409 | 0.6550 | 0.0724  | 0.4254 | 0.2330  | 0.0024 |
| -0.0361 | 0.6152 | -0.0043 | 0.9331 | -0.0936 | 0.2867 | 0.0359  | 0.6851 | -0.0588 | 0.4250 |
| -0.0145 | 0.8322 | 0.0481  | 0.4507 | 0.0572  | 0.4958 | 0.0001  | 0.9694 | 0.0844  | 0.2342 |
| -0.0718 | 0.5337 | 0.3121  | 0.0031 | 0.1828  | 0.2015 | 0.1204  | 0.2804 | -0.0440 | 0.7123 |
| -0.2051 | 0.0752 | 0.0712  | 0.5457 | 0.0141  | 0.9206 | -0.0314 | 0.8092 | -0.0888 | 0.4577 |
| -0.1657 | 0.0376 | 0.0552  | 0.4838 | 0.0663  | 0.4986 | 0.0117  | 0.8745 | -0.0703 | 0.3978 |
| -0.1022 | 0.1745 | 0.0477  | 0.4779 | 0.0474  | 0.6091 | -0.0623 | 0.4498 | -0.0760 | 0.3305 |
| 0.1150  | 0.0963 | 0.0229  | 0.6860 | 0.1130  | 0.1843 | 0.0503  | 0.4951 | 0.1550  | 0.0313 |
| -0.1712 | 0.0264 | 0.0230  | 0.7800 | 0.0338  | 0.7225 | -0.0121 | 0.8940 | -0.0621 | 0.4397 |
| -0.1703 | 0.0516 | -0.0113 | 0.8158 | 0.0054  | 0.9603 | -0.0459 | 0.6291 | -0.1455 | 0.1108 |
| -0.1593 | 0.0691 | -0.0238 | 0.6941 | 0.0049  | 0.9637 | -0.0397 | 0.6775 | -0.1414 | 0.1222 |
| -0.2051 | 0.0752 | 0.0712  | 0.5457 | 0.0141  | 0.9206 | -0.0314 | 0.8092 | -0.0888 | 0.4577 |
| -0.2100 | 0.0645 | -0.0433 | 0.5978 | 0.0116  | 0.9335 | -0.0972 | 0.4421 | -0.1083 | 0.3578 |
| -0.1433 | 0.0646 | 0.0355  | 0.6155 | 0.0792  | 0.4058 | -0.0366 | 0.6735 | -0.0664 | 0.4103 |
| 0.0715  | 0.4301 | 0.0320  | 0.6690 | -0.0154 | 0.8894 | 0.1113  | 0.2679 | -0.0445 | 0.6369 |
| -0.0025 | 0.9703 | 0.0276  | 0.6601 | -0.0135 | 0.8712 | 0.0344  | 0.6668 | 0.0522  | 0.4598 |
| -0.0115 | 0.8704 | 0.0875  | 0.1736 | 0.0733  | 0.4025 | 0.0100  | 0.8176 | 0.0066  | 0.9288 |
| -0.0293 | 0.8316 | 0.0346  | 0.7585 | 0.1731  | 0.3023 | 0.0987  | 0.6159 | 0.1632  | 0.2549 |
| -0.0855 | 0.2232 | 0.1082  | 0.1119 | 0.0523  | 0.5476 | -0.0531 | 0.5353 | -0.0354 | 0.6274 |
| 0.0870  | 0.3822 | 0.0843  | 0.3281 | 0.0100  | 0.9344 | 0.0622  | 0.5655 | 0.0618  | 0.5518 |
| 0.0229  | 0.7322 | 0.0467  | 0.4391 | -0.0071 | 0.9315 | 0.0651  | 0.3925 | 0.0547  | 0.4339 |
| -0.0210 | 0.7613 | -0.0277 | 0.6529 | -0.0723 | 0.3929 | -0.1713 | 0.0256 | -0.1058 | 0.1425 |
| -0.0630 | 0.6080 | 0.0485  | 0.6825 | 0.0060  | 0.9687 | 0.0279  | 0.8510 | -0.0875 | 0.4916 |
| 0.0774  | 0.4190 | 0.0005  | 0.9803 | 0.0507  | 0.6664 | 0.0912  | 0.4022 | -0.0130 | 0.8963 |
| -0.0025 | 0.9703 | 0.0275  | 0.6618 | -0.0135 | 0.8709 | 0.0344  | 0.6675 | 0.0522  | 0.4602 |
| 0.0084  | 0.8998 | 0.0360  | 0.5531 | -0.0323 | 0.6956 | -0.0776 | 0.2943 | -0.0426 | 0.5445 |
| -0.0073 | 0.9159 | -0.0165 | 0.7893 | -0.0346 | 0.6831 | -0.1216 | 0.1136 | -0.0909 | 0.2080 |
| -0.0194 | 0.7851 | 0.0979  | 0.1299 | 0.0502  | 0.5681 | -0.0229 | 0.8147 | -0.0086 | 0.9077 |
| -0.0099 | 0.8876 | 0.0913  | 0.1531 | 0.0567  | 0.5136 | 0.0200  | 0.7413 | 0.0124  | 0.8645 |
| 0.0597  | 0.4412 | 0.0987  | 0.1401 | -0.0060 | 0.9502 | 0.0240  | 0.7748 | 0.1136  | 0.1615 |
| -0.0061 | 0.9307 | 0.0895  | 0.1597 | 0.0605  | 0.4875 | 0.0157  | 0.7808 | 0.0149  | 0.8380 |
| 0.0382  | 0.7673 | 0.0483  | 0.7067 | 0.2129  | 0.1781 | -0.0592 | 0.5779 | 0.2430  | 0.0704 |
| -0.1089 | 0.2216 | 0.0779  | 0.3222 | 0.0018  | 0.9868 | -0.0372 | 0.7004 | -0.0435 | 0.6399 |
| 0.0811  | 0.3347 | 0.0465  | 0.5973 | 0.0419  | 0.6855 | 0.0633  | 0.5330 | 0.0609  | 0.4867 |
| -0.0987 | 0.2715 | 0.0726  | 0.3621 | 0.0007  | 0.9951 | -0.0704 | 0.4733 | -0.0388 | 0.6795 |
| 0.0000  | 1.0000 | -0.2608 | 1.0000 | 0.0000  | 1.0000 | 0.2580  | 1.0000 | 0.0000  | 1.0000 |
| 0.0061  | 0.9405 | 0.0045  | 0.9511 | -0.1371 | 0.1716 | 0.0310  | 0.7679 | -0.0999 | 0.2349 |
| -0.1573 | 0.0966 | 0.0389  | 0.7631 | 0.0830  | 0.4758 | 0.0184  | 0.8181 | -0.2335 | 0.0163 |
| 0.0148  | 0.8563 | -0.0320 | 0.6651 | 0.0432  | 0.6676 | -0.0275 | 0.7635 | 0.1685  | 0.0462 |
| 0.0182  | 0.7907 | 0.0811  | 0.1922 | -0.0245 | 0.7722 | 0.0075  | 0.9341 | 0.0813  | 0.2582 |
| -0.0137 | 0.8389 | 0.0219  | 0.7301 | 0.0375  | 0.6510 | 0.0696  | 0.3504 | 0.0318  | 0.6508 |
| -0.1160 | 0.3955 | -0.1070 | 0.3718 | 0.2081  | 0.2147 | 0.2432  | 0.0978 | -0.1926 | 0.1680 |
| 0.0647  | 0.4426 | -0.0858 | 0.2541 | 0.0785  | 0.4502 | 0.0874  | 0.3291 | 0.1095  | 0.2107 |
| -0.0595 | 0.5124 | 0.0594  | 0.4739 | 0.1080  | 0.3333 | -0.0340 | 0.7578 | -0.0304 | 0.7499 |
| 0.2828  | 0.0129 | -0.0489 | 0.7190 | -0.0167 | 0.9044 | -0.0637 | 0.6027 | 0.1446  | 0.2243 |
| -0.3440 | 0.6985 | 0.4021  | 0.3382 | 0.8352  | 0.4469 | 1.2790  | 0.0867 | -0.0118 | 0.9895 |
| -0.0402 | 0.5619 | -0.0122 | 0.8416 | 0.0313  | 0.7130 | -0.0164 | 0.8353 | 0.1048  | 0.1460 |

|         |        |         |        |         |        |         |        |         |        |
|---------|--------|---------|--------|---------|--------|---------|--------|---------|--------|
| -0.1016 | 0.5064 | 0.2119  | 0.1429 | 0.2874  | 0.1272 | 0.0497  | 0.6013 | 0.1497  | 0.3623 |
| -0.1650 | 0.8606 | 0.7005  | 0.2961 | 1.3111  | 0.2597 | 1.3205  | 0.3239 | -0.4619 | 0.6274 |
| 0.0430  | 0.6165 | -0.0326 | 0.6653 | 0.1039  | 0.3244 | 0.0169  | 0.8446 | -0.0080 | 0.9284 |
| 0.0595  | 0.4979 | -0.0538 | 0.5073 | 0.1051  | 0.3289 | 0.0726  | 0.4338 | 0.0328  | 0.7183 |
| -0.1603 | 0.4773 | -0.2116 | 0.3048 | -0.0939 | 0.7331 | 0.1185  | 0.6010 | -0.1135 | 0.6236 |
| 0.0047  | 0.9475 | -0.0190 | 0.7714 | -0.0502 | 0.5645 | -0.0524 | 0.5000 | -0.0061 | 0.9336 |
| 0.0906  | 0.2945 | -0.0685 | 0.3665 | 0.1294  | 0.2238 | 0.0264  | 0.7724 | -0.0474 | 0.5977 |
| -0.2586 | 1.0000 | -0.1563 | 0.7826 | 0.0547  | 1.0000 | 0.1378  | 0.8420 | -0.2012 | 1.0000 |
| -0.0715 | 0.3109 | 0.0936  | 0.1694 | 0.0573  | 0.5127 | -0.0211 | 0.8395 | -0.0061 | 0.9343 |
| 0.1090  | 0.1758 | -0.0759 | 0.2914 | -0.0955 | 0.3393 | -0.0302 | 0.7319 | 0.0051  | 0.9511 |
| -0.0318 | 0.6618 | -0.0217 | 0.7435 | 0.0812  | 0.3605 | 0.0214  | 0.7972 | 0.0528  | 0.4849 |
| 0.0186  | 0.8467 | -0.0572 | 0.5127 | 0.0885  | 0.4539 | 0.0731  | 0.4653 | -0.0951 | 0.3402 |
| -0.6568 | 0.4186 | 0.0160  | 0.8021 | 0.3173  | 0.7522 | 0.3780  | 0.3570 | -0.9365 | 0.2551 |
| 0.2698  | 0.0272 | -0.0204 | 0.9786 | 0.0136  | 0.9276 | -0.1601 | 0.2354 | 0.1015  | 0.4286 |
| 0.0259  | 0.8122 | 0.0052  | 0.9686 | 0.0097  | 0.9425 | 0.0351  | 0.7742 | -0.0513 | 0.6484 |
| 0.0550  | 0.5225 | 0.1257  | 0.0892 | -0.0657 | 0.5364 | 0.0393  | 0.6848 | 0.0252  | 0.7800 |
| 0.1620  | 0.1963 | -0.0293 | 0.9115 | 0.0278  | 0.8569 | -0.1564 | 0.2745 | 0.1295  | 0.3275 |
| -0.1223 | 0.3721 | -0.1167 | 0.3353 | 0.2203  | 0.1903 | 0.2501  | 0.0917 | -0.1978 | 0.1588 |
| 0.1401  | 0.5913 | -0.3389 | 0.1505 | 0.1383  | 0.6648 | 0.1255  | 0.7003 | 0.2652  | 0.3399 |
| 0.1516  | 0.1033 | -0.0367 | 0.6718 | 0.0989  | 0.3857 | 0.0350  | 0.7315 | 0.0108  | 0.9109 |
| -0.2966 | 0.2776 | -0.0205 | 0.8355 | -0.2028 | 0.5478 | 0.8168  | 0.0075 | -0.0297 | 0.9158 |
| -0.6961 | 0.3893 | 0.0113  | 0.8163 | 0.1960  | 0.8446 | 0.2542  | 0.5150 | -1.0042 | 0.2196 |
| 1.3242  | 0.0817 | -0.0996 | 0.9470 | 0.7097  | 0.4447 | -0.0866 | 0.9669 | 0.1961  | 0.8016 |
| 0.0748  | 0.3811 | -0.0339 | 0.6591 | 0.0566  | 0.5893 | 0.0787  | 0.3936 | 0.0257  | 0.7712 |
| 0.1149  | 0.4782 | 0.1766  | 0.1867 | -0.2119 | 0.2891 | 0.1979  | 0.3044 | 0.2800  | 0.1019 |
| -0.0466 | 0.5522 | 0.0676  | 0.3472 | -0.0334 | 0.7274 | 0.0305  | 0.7341 | -0.1177 | 0.1469 |
| -0.0562 | 0.6006 | -0.0195 | 0.8589 | -0.0096 | 0.9422 | -0.0873 | 0.4578 | -0.1214 | 0.2798 |

| glucose |        | 2-hour insulin |        |         |        | HOMA-IR |        |         |        |
|---------|--------|----------------|--------|---------|--------|---------|--------|---------|--------|
| sex_b   | sex_p  | age_b          | age_p  | sex_b   | sex_p  | age_b   | age_p  | sex_b   | sex_p  |
| 0.0473  | 0.4467 | 0.1063         | 0.2207 | 0.0364  | 0.6301 | 0.0746  | 0.3383 | 0.0102  | 0.8804 |
| 0.5210  | 0.2473 | 0.1637         | 0.8654 | 0.0835  | 0.9145 | 0.2372  | 0.7854 | 0.4629  | 0.3947 |
| 0.0379  | 0.6408 | 0.1315         | 0.3467 | 0.0169  | 0.9252 | -0.0284 | 0.8192 | -0.1330 | 0.2278 |
| 0.0120  | 0.7828 | 0.1418         | 0.1349 | -0.0047 | 0.9548 | 0.0276  | 0.7452 | -0.0559 | 0.4897 |
| 0.0150  | 0.8432 | 0.1457         | 0.1829 | 0.0498  | 0.5922 | 0.0769  | 0.4339 | 0.0755  | 0.3792 |
| 0.0920  | 0.4118 | 0.1740         | 0.2734 | 0.2311  | 0.0810 | 0.1140  | 0.4276 | 0.1119  | 0.3406 |
| -0.0179 | 0.8563 | 0.0938         | 0.4577 | -0.1400 | 0.2035 | 0.0097  | 0.9318 | -0.0140 | 0.8881 |
| 0.0235  | 0.7493 | 0.1557         | 0.2418 | -0.0831 | 0.5061 | 0.0144  | 0.9032 | 0.0397  | 0.7033 |
| -0.0365 | 0.8016 | 0.0559         | 0.7237 | -0.1089 | 0.4526 | 0.0239  | 0.8646 | -0.0499 | 0.7036 |
| -0.0403 | 0.5878 | -0.0692        | 0.4844 | 0.0638  | 0.4955 | -0.1031 | 0.2467 | 0.0373  | 0.6676 |
| -0.0605 | 0.6509 | 0.0275         | 0.8650 | -0.1241 | 0.3978 | -0.0305 | 0.8310 | -0.0570 | 0.6387 |
| 0.0434  | 0.6619 | -0.0488        | 0.7848 | -0.0134 | 0.9049 | -0.0202 | 0.8997 | 0.0121  | 0.9436 |
| -0.0258 | 0.8863 | -0.0626        | 0.7072 | -0.1042 | 0.4443 | -0.0777 | 0.6016 | 0.0133  | 0.9566 |
| 0.0828  | 0.1853 | 0.1423         | 0.1156 | 0.0389  | 0.5746 | 0.0953  | 0.2374 | -0.0479 | 0.5686 |
| 0.0600  | 0.6852 | 0.2872         | 0.7829 | 0.4870  | 0.4434 | 0.1775  | 0.8548 | 0.8441  | 0.1234 |
| 0.1150  | 0.5180 | -0.0116        | 0.9653 | -0.1946 | 0.3850 | 0.3156  | 0.1933 | 0.0268  | 0.9608 |
| 0.1138  | 0.6946 | 0.2188         | 0.5017 | -0.1631 | 0.5575 | 0.0763  | 0.7905 | -0.0576 | 0.8289 |
| -0.0487 | 0.4452 | -0.1524        | 0.2025 | -0.1881 | 0.0703 | 0.0497  | 0.6465 | 0.0168  | 0.8356 |
| -0.0704 | 0.3403 | -0.1006        | 0.3297 | 0.0424  | 0.6820 | -0.0754 | 0.4168 | -0.0155 | 0.8321 |
| 0.0003  | 0.9975 | 0.0302         | 0.8048 | 0.0957  | 0.3976 | 0.0799  | 0.4636 | 0.0965  | 0.3388 |
| 0.0306  | 0.7050 | 0.1102         | 0.3402 | 0.0029  | 0.9751 | -0.0200 | 0.8451 | -0.0401 | 0.6553 |
| 0.0527  | 0.4784 | -0.0838        | 0.4153 | 0.0511  | 0.5488 | -0.0860 | 0.3490 | -0.0010 | 0.9869 |
| 0.0545  | 0.4823 | 0.0837         | 0.4485 | 0.0885  | 0.3525 | 0.1238  | 0.2119 | 0.0173  | 0.8373 |
| 0.0062  | 0.9496 | 0.1143         | 0.3520 | 0.0658  | 0.5223 | 0.0903  | 0.4129 | 0.0405  | 0.6602 |
| 0.0195  | 0.7102 | 0.0738         | 0.4530 | -0.0250 | 0.8244 | -0.0400 | 0.6436 | -0.0268 | 0.7076 |
| -0.0936 | 0.1861 | 0.0603         | 0.5240 | -0.1473 | 0.0888 | -0.0192 | 0.8196 | -0.1275 | 0.0932 |
| 0.0440  | 0.5987 | 0.1272         | 0.3061 | 0.0443  | 0.6463 | 0.0260  | 0.8165 | 0.1144  | 0.2502 |
| 0.0625  | 0.5914 | 0.2362         | 0.1791 | 0.3382  | 0.0343 | 0.1742  | 0.2750 | 0.2263  | 0.1205 |
| -0.0140 | 0.8594 | 0.1005         | 0.2722 | -0.0762 | 0.3653 | 0.0782  | 0.3360 | 0.0076  | 0.9003 |
| 0.0092  | 0.8908 | -0.1247        | 0.2617 | 0.0229  | 0.8389 | -0.0619 | 0.5304 | 0.0716  | 0.4210 |
| -0.0682 | 0.3382 | -0.1472        | 0.2194 | -0.2195 | 0.0386 | 0.0338  | 0.7561 | 0.0165  | 0.8501 |
| 0.0621  | 1.0000 | -0.0393        | 1.0000 | -0.0485 | 1.0000 | 0.2524  | 1.0000 | 0.1207  | 1.0000 |
| -0.0455 | 0.4975 | -0.0543        | 0.5467 | -0.1227 | 0.1145 | 0.0506  | 0.5325 | 0.0358  | 0.5746 |
| 0.0332  | 0.6251 | 0.0531         | 0.5918 | -0.0025 | 0.9937 | -0.0003 | 0.9964 | -0.0381 | 0.6332 |
| 0.0217  | 0.7987 | 0.1615         | 0.1665 | 0.0278  | 0.7900 | 0.1105  | 0.2920 | 0.0628  | 0.5082 |
| 0.1213  | 0.7032 | 0.6074         | 0.3061 | 0.1779  | 0.7889 | 0.4549  | 0.4083 | 0.1775  | 0.7306 |
| 0.0936  | 0.7722 | 0.5549         | 0.3463 | 0.2172  | 0.7100 | 0.4888  | 0.3692 | 0.1600  | 0.7853 |
| 0.9270  | 0.0078 | 0.3752         | 0.4701 | 0.5394  | 0.2127 | 0.2432  | 0.6111 | 0.3764  | 0.3426 |
| 0.0045  | 0.9378 | 0.0335         | 0.9220 | 0.3393  | 0.2472 | -0.1675 | 0.5945 | 0.5920  | 0.0358 |
| -0.9159 | 0.0560 | -0.5668        | 0.4373 | -0.4088 | 0.5312 | -0.5993 | 0.3152 | 1.0188  | 0.0491 |
| 0.0334  | 0.7153 | 0.1817         | 0.2179 | 0.0677  | 0.6370 | -0.0751 | 0.5669 | -0.0404 | 0.7368 |
| -0.3473 | 0.0998 | -0.0830        | 0.7606 | -0.4453 | 0.0737 | -0.2198 | 0.3675 | -0.4836 | 0.0363 |
| -0.0607 | 0.3747 | -0.1612        | 0.1792 | -0.2115 | 0.0449 | 0.0251  | 0.8175 | 0.0182  | 0.8430 |
| -0.7383 | 0.2210 | 0.5185         | 0.6241 | -0.4820 | 0.4515 | -0.0069 | 0.9945 | 0.9588  | 0.1752 |



|         |        |         |        |         |        |         |        |         |        |
|---------|--------|---------|--------|---------|--------|---------|--------|---------|--------|
| 0.0477  | 0.4172 | 0.0638  | 0.5058 | 0.0252  | 0.7522 | -0.0335 | 0.6959 | 0.0521  | 0.5408 |
| -0.1502 | 0.0246 | -0.1268 | 0.1646 | -0.0925 | 0.2510 | -0.0932 | 0.2570 | 0.0414  | 0.6121 |
| 0.0335  | 0.5622 | 0.1221  | 0.1630 | 0.0878  | 0.2394 | 0.0559  | 0.4761 | 0.0058  | 0.9053 |
| 0.0836  | 0.4529 | 0.1150  | 0.4408 | 0.1082  | 0.3679 | 0.1485  | 0.2669 | 0.1607  | 0.1428 |
| 0.0268  | 0.8283 | -0.1350 | 0.3591 | 0.0011  | 0.9734 | -0.0218 | 0.8691 | -0.0189 | 0.8686 |
| 0.0411  | 0.5860 | -0.0596 | 0.5618 | 0.0877  | 0.3403 | 0.0234  | 0.7980 | 0.0195  | 0.8039 |
| 0.0777  | 0.2536 | 0.0304  | 0.7530 | 0.0874  | 0.3032 | 0.0202  | 0.8158 | -0.0417 | 0.5871 |
| 0.0288  | 0.6278 | 0.1222  | 0.1733 | -0.0179 | 0.8530 | 0.1324  | 0.0960 | 0.0505  | 0.4589 |
| 0.0733  | 0.3011 | 0.0011  | 0.9912 | 0.0871  | 0.3168 | -0.0056 | 0.9499 | -0.0100 | 0.8972 |
| 0.0368  | 0.6764 | -0.0535 | 0.6352 | 0.0717  | 0.4724 | -0.0364 | 0.7173 | -0.0461 | 0.5915 |
| 0.0307  | 0.7339 | -0.0454 | 0.6881 | 0.0783  | 0.4312 | -0.0342 | 0.7347 | -0.0433 | 0.6154 |
| 0.0268  | 0.8283 | -0.1350 | 0.3591 | 0.0011  | 0.9734 | -0.0218 | 0.8691 | -0.0189 | 0.8686 |
| 0.0736  | 0.5164 | -0.1341 | 0.3555 | 0.0317  | 0.8451 | -0.0290 | 0.8241 | -0.0985 | 0.3951 |
| 0.0932  | 0.1856 | 0.0013  | 0.9898 | 0.0742  | 0.3956 | 0.0407  | 0.6478 | -0.0267 | 0.7398 |
| 0.1286  | 0.1323 | 0.0179  | 0.8789 | 0.0951  | 0.3543 | -0.0059 | 0.9545 | 0.1006  | 0.2817 |
| 0.0619  | 0.3109 | 0.0812  | 0.3526 | 0.0764  | 0.3012 | -0.0038 | 0.9609 | 0.0391  | 0.5908 |
| -0.0350 | 0.6020 | -0.0456 | 0.6152 | -0.1212 | 0.1215 | 0.0630  | 0.4404 | 0.0281  | 0.6325 |
| 0.0824  | 0.6283 | 0.2414  | 0.1829 | 0.0882  | 0.6917 | 0.1472  | 0.3485 | 0.0933  | 0.6010 |
| -0.0971 | 0.1272 | -0.0822 | 0.3657 | -0.1426 | 0.0651 | 0.0295  | 0.7162 | -0.0261 | 0.7479 |
| 0.1247  | 0.1655 | 0.0156  | 0.9035 | -0.0054 | 0.9663 | 0.0255  | 0.8226 | 0.0781  | 0.4380 |
| 0.0805  | 0.1943 | 0.0529  | 0.5396 | 0.1025  | 0.1814 | 0.0047  | 0.9508 | 0.0711  | 0.3136 |
| -0.1028 | 0.1033 | -0.1799 | 0.0426 | -0.1499 | 0.0515 | -0.0738 | 0.3510 | -0.1595 | 0.0257 |
| -0.1558 | 0.2029 | -0.1979 | 0.2066 | -0.1240 | 0.4092 | -0.0122 | 0.9314 | 0.0377  | 0.7859 |
| -0.0024 | 0.9783 | 0.0334  | 0.7865 | 0.0574  | 0.6144 | 0.0703  | 0.5216 | 0.0907  | 0.3700 |
| 0.0620  | 0.3107 | 0.0812  | 0.3528 | 0.0763  | 0.3020 | -0.0038 | 0.9607 | 0.0390  | 0.5918 |
| -0.0651 | 0.2864 | -0.1099 | 0.2063 | -0.1498 | 0.0452 | -0.0346 | 0.6531 | -0.0697 | 0.3100 |
| -0.0866 | 0.1691 | -0.1265 | 0.1537 | -0.1337 | 0.0854 | -0.0376 | 0.6356 | -0.1156 | 0.1067 |
| -0.0624 | 0.3397 | -0.0599 | 0.5116 | -0.1554 | 0.0494 | 0.0420  | 0.6093 | -0.0013 | 0.9733 |
| -0.0456 | 0.4975 | -0.0543 | 0.5467 | -0.1227 | 0.1144 | 0.0506  | 0.5324 | 0.0358  | 0.5744 |
| 0.0095  | 0.8903 | -0.0141 | 0.8894 | -0.0134 | 0.8762 | 0.0150  | 0.8671 | 0.0427  | 0.5815 |
| -0.0473 | 0.4831 | -0.0530 | 0.5567 | -0.1206 | 0.1213 | 0.0546  | 0.5018 | 0.0318  | 0.6104 |
| 0.0117  | 0.9403 | 0.2994  | 0.0768 | -0.0971 | 0.4253 | 0.1988  | 0.1789 | -0.0414 | 0.6515 |
| 0.0336  | 0.6742 | 0.1069  | 0.3541 | 0.0241  | 0.8141 | -0.0281 | 0.7837 | -0.0233 | 0.7940 |
| -0.0027 | 0.9263 | 0.0529  | 0.6251 | 0.0154  | 0.9116 | 0.0563  | 0.5602 | 0.0669  | 0.4862 |
| 0.0425  | 0.6008 | 0.1008  | 0.3865 | 0.0158  | 0.8806 | -0.0270 | 0.7947 | -0.0552 | 0.5458 |
| -0.5611 | 1.0000 | 0.0000  | 1.0000 | -0.0434 | 1.0000 | 0.0000  | 1.0000 | 0.2068  | 1.0000 |
| -0.0391 | 0.5960 | -0.1490 | 0.1524 | 0.0799  | 0.4277 | -0.1286 | 0.1699 | 0.0261  | 0.7937 |
| -0.0691 | 0.3341 | -0.1466 | 0.2220 | -0.2172 | 0.0410 | 0.0350  | 0.7478 | 0.0177  | 0.8406 |
| -0.0592 | 0.4370 | -0.0192 | 0.8550 | -0.1680 | 0.0736 | 0.0472  | 0.6160 | -0.0316 | 0.7123 |
| 0.0399  | 0.5134 | 0.0587  | 0.5089 | 0.0589  | 0.4484 | -0.0113 | 0.8865 | 0.0237  | 0.7496 |
| 0.0446  | 0.4756 | 0.0700  | 0.4202 | 0.1091  | 0.1575 | 0.0368  | 0.6339 | 0.0649  | 0.3507 |
| 0.0807  | 0.4933 | 0.1297  | 0.4521 | 0.2907  | 0.0522 | 0.1434  | 0.3608 | 0.1972  | 0.1498 |
| 0.0136  | 0.8383 | 0.1965  | 0.0683 | -0.0019 | 0.9798 | 0.0769  | 0.4283 | 0.0737  | 0.3771 |
| 0.0761  | 0.3685 | 0.1013  | 0.3896 | 0.0847  | 0.4141 | 0.0814  | 0.4352 | -0.0158 | 0.8845 |
| -0.0395 | 0.7440 | 0.0861  | 0.5573 | -0.1724 | 0.1873 | 0.0400  | 0.7590 | -0.0505 | 0.6745 |
| 0.8069  | 0.1169 | 1.0813  | 0.3241 | 1.2656  | 0.1135 | 0.5799  | 0.5706 | 1.2321  | 0.0623 |
| -0.0105 | 0.8786 | 0.0791  | 0.3749 | 0.0032  | 0.9711 | 0.0304  | 0.7019 | -0.0185 | 0.8017 |

|         |        |         |        |         |        |         |        |         |        |
|---------|--------|---------|--------|---------|--------|---------|--------|---------|--------|
| 0.0569  | 0.5888 | -0.0133 | 0.9474 | 0.1057  | 0.5481 | 0.2441  | 0.1656 | 0.0941  | 0.4193 |
| 0.4352  | 0.4204 | 0.5707  | 0.6221 | 1.1450  | 0.2830 | 1.0372  | 0.3384 | 1.2289  | 0.2897 |
| 0.0334  | 0.6630 | 0.1066  | 0.3320 | 0.0594  | 0.5211 | 0.0932  | 0.3444 | 0.0200  | 0.8070 |
| 0.0256  | 0.7434 | 0.1569  | 0.1612 | 0.0833  | 0.3789 | 0.1027  | 0.3077 | 0.0666  | 0.4411 |
| 0.1429  | 0.4514 | 0.0000  | 1.0000 | 0.1711  | 0.4847 | -0.1048 | 0.6844 | 0.0915  | 0.6588 |
| -0.1475 | 0.0275 | -0.0534 | 0.5551 | -0.1086 | 0.1844 | -0.0465 | 0.5687 | -0.0379 | 0.5983 |
| 0.0612  | 0.4304 | 0.0842  | 0.4467 | 0.0924  | 0.3322 | 0.1246  | 0.2104 | 0.0250  | 0.7687 |
| -0.4548 | 0.4340 | -0.1499 | 1.0000 | 0.2077  | 0.7701 | 0.1299  | 1.0000 | 0.0968  | 0.8810 |
| -0.0662 | 0.3109 | -0.0668 | 0.4649 | -0.1309 | 0.0933 | 0.0363  | 0.6570 | -0.0006 | 0.9705 |
| 0.0679  | 0.3541 | -0.0208 | 0.8411 | -0.0182 | 0.8448 | -0.0690 | 0.4588 | -0.0339 | 0.6812 |
| 0.0287  | 0.6760 | 0.1737  | 0.0612 | 0.1512  | 0.0736 | 0.0678  | 0.4150 | 0.0089  | 0.9110 |
| 0.0103  | 0.9476 | 0.0738  | 0.5478 | 0.0905  | 0.3867 | 0.0725  | 0.5111 | 0.0700  | 0.4575 |
| 0.1392  | 0.4711 | 0.2311  | 0.8175 | 0.3803  | 0.3516 | 0.0968  | 0.9176 | 0.3489  | 0.3362 |
| -0.0688 | 0.5943 | 0.0676  | 0.6683 | -0.1805 | 0.2068 | 0.0587  | 0.6749 | -0.1194 | 0.3608 |
| 0.0867  | 0.3749 | 0.1652  | 0.2358 | 0.1786  | 0.1713 | 0.0098  | 0.9378 | 0.0283  | 0.8054 |
| 0.0127  | 0.8678 | -0.1585 | 0.1558 | 0.0292  | 0.7729 | -0.0384 | 0.6986 | 0.0629  | 0.4739 |
| -0.0599 | 0.6967 | 0.0906  | 0.5774 | -0.1727 | 0.2606 | 0.0526  | 0.7155 | -0.1162 | 0.3987 |
| 0.0639  | 0.5802 | 0.1233  | 0.4753 | 0.2780  | 0.0650 | 0.1539  | 0.3282 | 0.2032  | 0.1414 |
| 0.0726  | 0.8819 | 0.0988  | 0.7727 | -0.2906 | 0.3297 | 0.1593  | 0.5936 | 0.0266  | 0.9591 |
| 0.0005  | 0.9950 | 0.1183  | 0.3189 | 0.0051  | 0.9559 | 0.1111  | 0.2972 | 0.0391  | 0.6814 |
| 0.2676  | 0.2899 | -0.1354 | 0.6941 | 0.5029  | 0.1110 | -0.2112 | 0.5029 | 0.7359  | 0.0103 |
| 0.0931  | 0.5597 | 0.1194  | 0.9046 | 0.2713  | 0.4830 | -0.0221 | 0.9811 | 0.2348  | 0.4886 |
| -0.1594 | 0.7352 | 0.6920  | 0.4699 | -0.1506 | 0.8726 | 0.8732  | 0.3150 | -0.1115 | 0.9500 |
| 0.0145  | 0.8498 | 0.1184  | 0.2776 | 0.0506  | 0.5901 | 0.0616  | 0.5299 | 0.0751  | 0.3828 |
| 0.1201  | 0.2999 | -0.1568 | 0.4571 | 0.0815  | 0.7173 | -0.1509 | 0.4190 | 0.2207  | 0.2042 |
| 0.0979  | 0.1990 | -0.0819 | 0.4143 | 0.0787  | 0.3989 | -0.0373 | 0.6771 | 0.0342  | 0.6836 |
| 0.0747  | 0.3949 | 0.1493  | 0.2838 | 0.0720  | 0.6036 | -0.0278 | 0.8219 | -0.0838 | 0.4490 |

| HOMA-β  |        |         |        |
|---------|--------|---------|--------|
| age_b   | age_p  | sex_b   | sex_p  |
| -0.0040 | 0.9567 | -0.0341 | 0.6088 |
| 0.0526  | 0.9503 | 0.5123  | 0.2913 |
| -0.0071 | 0.9519 | 0.0643  | 0.5351 |
| 0.0391  | 0.6253 | -0.1287 | 0.0875 |
| 0.0253  | 0.7868 | 0.1314  | 0.1086 |
| -0.0679 | 0.6166 | -0.1163 | 0.3081 |
| -0.0068 | 0.9495 | 0.1440  | 0.1223 |
| -0.0443 | 0.6942 | 0.1740  | 0.0840 |
| -0.0560 | 0.6728 | 0.2069  | 0.0869 |
| 0.1364  | 0.1045 | 0.0736  | 0.3345 |
| -0.0085 | 0.9500 | 0.2376  | 0.0518 |
| -0.0550 | 0.7165 | 0.1410  | 0.3082 |
| 0.0111  | 0.9374 | 0.0639  | 0.5988 |
| -0.1256 | 0.0999 | -0.0070 | 0.8430 |
| 0.4527  | 0.6129 | -0.2941 | 0.4516 |
| -0.1075 | 0.6421 | 0.0666  | 0.7098 |
| -0.1496 | 0.5837 | 0.2698  | 0.2870 |
| -0.0015 | 0.9884 | -0.0618 | 0.5178 |
| 0.0729  | 0.4056 | 0.0694  | 0.3773 |
| 0.0394  | 0.7039 | 0.0895  | 0.3502 |
| 0.1554  | 0.1109 | -0.0879 | 0.3186 |
| -0.1086 | 0.2094 | 0.0519  | 0.4858 |
| -0.0680 | 0.4696 | 0.1633  | 0.0466 |
| -0.0015 | 0.9884 | 0.1731  | 0.0633 |
| 0.0303  | 0.7117 | -0.0677 | 0.3871 |
| 0.0196  | 0.8055 | 0.0123  | 0.8574 |
| 0.0853  | 0.4197 | -0.1236 | 0.2116 |
| 0.0703  | 0.6428 | 0.0636  | 0.6497 |
| -0.1203 | 0.1187 | 0.0064  | 0.9587 |
| -0.0520 | 0.5748 | -0.0548 | 0.4761 |
| 0.0030  | 0.9766 | -0.0661 | 0.4945 |
| -0.1026 | 1.0000 | -0.1374 | 1.0000 |
| -0.0700 | 0.3593 | -0.0707 | 0.2586 |
| 0.0259  | 0.7539 | -0.0827 | 0.2792 |
| -0.0157 | 0.8745 | 0.1732  | 0.0530 |
| -0.3515 | 0.4915 | -0.2553 | 0.5298 |
| -0.3985 | 0.4336 | -0.2090 | 0.6401 |
| -0.4005 | 0.3755 | -0.2872 | 0.5042 |
| -0.0462 | 0.8762 | -0.1913 | 0.4442 |
| 0.0604  | 0.9144 | -0.6777 | 0.1942 |
| -0.0701 | 0.5695 | 0.0554  | 0.6055 |
| -0.0118 | 0.9596 | 0.2647  | 0.2130 |
| 0.0034  | 0.9739 | -0.0760 | 0.4341 |
| -0.3900 | 0.6688 | -0.5763 | 0.4525 |

|         |        |         |        |
|---------|--------|---------|--------|
| 0.0188  | 0.8176 | -0.0526 | 0.5082 |
| 0.1306  | 0.0933 | 0.1181  | 0.0874 |
| 0.0215  | 0.7726 | -0.0682 | 0.3267 |
| 0.1325  | 0.2975 | -0.3130 | 0.0078 |
| 0.0958  | 0.4459 | -0.1562 | 0.1763 |
| 0.0835  | 0.3375 | -0.0339 | 0.6846 |
| 0.0433  | 0.5989 | -0.0387 | 0.5937 |
| -0.1285 | 0.0887 | -0.0640 | 0.3231 |
| 0.0778  | 0.3563 | -0.0285 | 0.7193 |
| 0.1121  | 0.2418 | -0.0262 | 0.7868 |
| 0.1008  | 0.2932 | -0.0140 | 0.8989 |
| 0.0958  | 0.4459 | -0.1562 | 0.1763 |
| 0.1366  | 0.2705 | -0.0496 | 0.6936 |
| 0.0512  | 0.5452 | -0.0393 | 0.6021 |
| -0.1135 | 0.2510 | -0.0784 | 0.3430 |
| 0.0605  | 0.4097 | 0.0073  | 0.8607 |
| -0.0700 | 0.3616 | -0.0671 | 0.2790 |
| -0.0902 | 0.5493 | -0.1572 | 0.2820 |
| 0.0665  | 0.3855 | -0.1006 | 0.1712 |
| -0.0428 | 0.6917 | 0.0077  | 0.9433 |
| 0.0453  | 0.5349 | -0.0110 | 0.8890 |
| -0.0056 | 0.9407 | 0.0085  | 0.9039 |
| -0.0411 | 0.7597 | 0.0216  | 0.8711 |
| 0.0626  | 0.5489 | 0.0785  | 0.4123 |
| 0.0606  | 0.4096 | 0.0074  | 0.8591 |
| -0.0516 | 0.4805 | -0.0605 | 0.3362 |
| -0.0312 | 0.6786 | 0.0000  | 0.9878 |
| -0.0599 | 0.4371 | -0.0803 | 0.2164 |
| -0.0701 | 0.3582 | -0.0707 | 0.2584 |
| -0.0928 | 0.2708 | -0.0848 | 0.2347 |
| -0.0731 | 0.3380 | -0.0699 | 0.2623 |
| -0.1438 | 0.3093 | -0.1334 | 0.3505 |
| 0.1585  | 0.1034 | -0.0918 | 0.2900 |
| -0.0291 | 0.7517 | -0.0214 | 0.8212 |
| 0.1513  | 0.1235 | -0.0828 | 0.3477 |
| 0.0000  | 1.0000 | 0.2678  | 1.0000 |
| 0.1079  | 0.2218 | 0.0491  | 0.5288 |
| 0.0033  | 0.9743 | -0.0668 | 0.4905 |
| -0.0753 | 0.4010 | 0.0112  | 0.8930 |
| 0.0580  | 0.4379 | -0.0315 | 0.6677 |
| 0.0439  | 0.5492 | -0.0435 | 0.5356 |
| 0.0944  | 0.5249 | 0.1477  | 0.2510 |
| 0.0534  | 0.5599 | 0.1925  | 0.0158 |
| 0.0036  | 0.9707 | -0.0018 | 0.9845 |
| -0.0663 | 0.5911 | 0.2223  | 0.0443 |
| 0.1759  | 0.8519 | -0.5610 | 0.2653 |
| 0.0946  | 0.2081 | 0.0304  | 0.6525 |

|         |        |         |        |
|---------|--------|---------|--------|
| 0.0107  | 0.9486 | -0.0091 | 0.9581 |
| 0.0431  | 0.9655 | -0.7589 | 0.3107 |
| -0.0065 | 0.9448 | 0.1124  | 0.1654 |
| 0.0091  | 0.9246 | 0.1508  | 0.0767 |
| 0.1200  | 0.6277 | 0.1773  | 0.4283 |
| 0.1415  | 0.0669 | 0.1525  | 0.0268 |
| -0.0637 | 0.4987 | 0.1561  | 0.0574 |
| 0.0759  | 1.0000 | 0.1923  | 0.7562 |
| 0.0449  | 0.5602 | -0.0843 | 0.2482 |
| -0.0556 | 0.5268 | 0.0958  | 0.2195 |
| -0.0038 | 0.9615 | -0.0180 | 0.8026 |
| 0.0908  | 0.3846 | 0.1915  | 0.0352 |
| 0.5713  | 0.5069 | -0.0749 | 0.6946 |
| -0.0326 | 0.8058 | 0.2266  | 0.0580 |
| -0.1173 | 0.3217 | -0.0848 | 0.4640 |
| -0.0565 | 0.5448 | -0.0792 | 0.3192 |
| 0.0202  | 0.8825 | 0.2145  | 0.0800 |
| 0.0969  | 0.5153 | 0.1545  | 0.2337 |
| -0.1645 | 0.5629 | 0.2623  | 0.2956 |
| -0.0097 | 0.9240 | 0.1917  | 0.0359 |
| 0.0021  | 0.9942 | 0.0072  | 0.9778 |
| 0.6121  | 0.4749 | -0.0574 | 0.7307 |
| -1.3739 | 0.1000 | -0.0201 | 0.7053 |
| 0.0276  | 0.7672 | 0.1486  | 0.0692 |
| 0.0463  | 0.7938 | 0.0366  | 0.7927 |
| -0.0125 | 0.8834 | -0.1404 | 0.0637 |
| 0.0068  | 0.9532 | -0.0076 | 0.9388 |

SUPPLEMENTARY TABLE 3

| Model    | BIC     | Loglike  | H2r       | SE | bsnp_rs2938864 | SE | bsnp_rs1001646 |
|----------|---------|----------|-----------|----|----------------|----|----------------|
| cov0     | 0       | -644.099 | 0.6506335 | 0  | 0              | 0  | 0              |
| cov9     | 2.799   | -641.893 | 0.6568594 | 0  | 0              | 0  | 0              |
| cov10    | 2.8645  | -641.926 | 0.6577182 | 0  | 0              | 0  | 0              |
| cov2     | 3.1002  | -642.044 | 0.6513084 | 0  | 0              | 0  | 0.12280941     |
| cov4     | 3.4645  | -642.226 | 0.6508513 | 0  | 0              | 0  | 0              |
| cov6     | 3.7831  | -642.386 | 0.6563746 | 0  | 0              | 0  | 0              |
| cov7     | 3.8745  | -642.431 | 0.6505738 | 0  | 0              | 0  | 0              |
| cov8     | 3.9674  | -642.478 | 0.6505308 | 0  | 0              | 0  | 0              |
| cov1     | 4.1665  | -642.577 | 0.6566502 | 0  | 0.10614582     | 0  | 0              |
| cov5     | 5.6132  | -643.301 | 0.6523843 | 0  | 0              | 0  | 0              |
| cov11    | 5.9333  | -643.461 | 0.6503208 | 0  | 0              | 0  | 0              |
| cov3     | 6.5832  | -643.786 | 0.6481542 | 0  | 0              | 0  | 0              |
| cov2_7   | 7.2906  | -640.535 | 0.6523882 | 0  | 0              | 0  | 0.11822043     |
| cov7_9   | 7.3647  | -640.572 | 0.6556852 | 0  | 0              | 0  | 0              |
| cov2_8   | 7.3781  | -640.578 | 0.652335  | 0  | 0              | 0  | 0.11830478     |
| cov7_10  | 7.4187  | -640.599 | 0.6565204 | 0  | 0              | 0  | 0              |
| cov8_9   | 7.4528  | -640.616 | 0.6556638 | 0  | 0              | 0  | 0              |
| cov4_10  | 7.4547  | -640.617 | 0.656739  | 0  | 0              | 0  | 0              |
| cov4_9   | 7.4648  | -640.622 | 0.6558806 | 0  | 0              | 0  | 0              |
| cov8_10  | 7.5069  | -640.643 | 0.6564999 | 0  | 0              | 0  | 0              |
| cov6_7   | 8.1268  | -640.953 | 0.6570066 | 0  | 0              | 0  | 0              |
| cov4_7   | 8.1455  | -640.962 | 0.6515395 | 0  | 0              | 0  | 0              |
| cov4_8   | 8.2228  | -641.001 | 0.6514937 | 0  | 0              | 0  | 0              |
| cov6_8   | 8.2241  | -641.001 | 0.6569483 | 0  | 0              | 0  | 0              |
| cov3_9   | 8.3134  | -641.046 | 0.6522408 | 0  | 0              | 0  | 0              |
| cov2_9   | 8.3315  | -641.055 | 0.6559333 | 0  | 0              | 0  | 0.085569186    |
| cov2_10  | 8.3452  | -641.062 | 0.6566445 | 0  | 0              | 0  | 0.08655581     |
| cov3_10  | 8.352   | -641.065 | 0.6531891 | 0  | 0              | 0  | 0              |
| cov1_7   | 8.4513  | -641.115 | 0.6573758 | 0  | 0.099163941    | 0  | 0              |
| cov1_8   | 8.5369  | -641.158 | 0.657328  | 0  | 0.099297468    | 0  | 0              |
| cov6_9   | 9.0191  | -641.399 | 0.658846  | 0  | 0              | 0  | 0              |
| cov6_10  | 9.0289  | -641.404 | 0.6596066 | 0  | 0              | 0  | 0              |
| cov2_3   | 9.0953  | -641.437 | 0.6489997 | 0  | 0              | 0  | 0.13285509     |
| cov5_9   | 9.1302  | -641.454 | 0.6576566 | 0  | 0              | 0  | 0              |
| cov5_10  | 9.1367  | -641.458 | 0.6585357 | 0  | 0              | 0  | 0              |
| cov1_9   | 9.157   | -641.468 | 0.6592813 | 0  | 0.062341699    | 0  | 0              |
| cov1_10  | 9.1696  | -641.474 | 0.6600707 | 0  | 0.063869964    | 0  | 0              |
| cov7_11  | 9.2196  | -641.499 | 0.6510568 | 0  | 0              | 0  | 0              |
| cov8_11  | 9.3238  | -641.551 | 0.6509964 | 0  | 0              | 0  | 0              |
| cov5_7   | 9.6189  | -641.699 | 0.6533035 | 0  | 0              | 0  | 0              |
| cov5_8   | 9.7076  | -641.743 | 0.6532504 | 0  | 0              | 0  | 0              |
| cov9_11  | 9.7588  | -641.769 | 0.6565377 | 0  | 0              | 0  | 0              |
| cov10_11 | 9.7987  | -641.789 | 0.65733   | 0  | 0              | 0  | 0              |
| cov3_6   | 9.8729  | -641.826 | 0.6542969 | 0  | 0              | 0  | 0              |
| cov9_10  | 10.0012 | -641.89  | 0.6571005 | 0  | 0              | 0  | 0              |

|           |         |          |           |   |             |   |             |
|-----------|---------|----------|-----------|---|-------------|---|-------------|
| cov2_4    | 10.0489 | -641.914 | 0.6511971 | 0 | 0           | 0 | 0.080670476 |
| cov4_5    | 10.0752 | -641.927 | 0.6486932 | 0 | 0           | 0 | 0           |
| cov2_6    | 10.1454 | -641.962 | 0.6530938 | 0 | 0           | 0 | 0.091047655 |
| cov4_6    | 10.1675 | -641.973 | 0.6538662 | 0 | 0           | 0 | 0           |
| cov2_5    | 10.1946 | -641.987 | 0.6507369 | 0 | 0           | 0 | 0.14519078  |
| cov2_11   | 10.2173 | -641.998 | 0.651682  | 0 | 0           | 0 | 0.1393044   |
| cov1_3    | 10.29   | -642.034 | 0.6545964 | 0 | 0.11512543  | 0 | 0           |
| cov1_2    | 10.3046 | -642.042 | 0.651728  | 0 | 0.007887272 | 0 | 0.11620718  |
| cov3_4    | 10.4074 | -642.093 | 0.6495112 | 0 | 0           | 0 | 0           |
| cov1_4    | 10.4451 | -642.112 | 0.653267  | 0 | 0.042810572 | 0 | 0           |
| cov4_11   | 10.6714 | -642.225 | 0.6508087 | 0 | 0           | 0 | 0           |
| cov3_7    | 10.6906 | -642.235 | 0.653323  | 0 | 0           | 0 | 0           |
| cov3_8    | 10.8207 | -642.3   | 0.6530821 | 0 | 0           | 0 | 0           |
| cov5_6    | 10.9013 | -642.34  | 0.6569116 | 0 | 0           | 0 | 0           |
| cov6_11   | 10.9084 | -642.343 | 0.6574478 | 0 | 0           | 0 | 0           |
| cov7_8    | 10.9565 | -642.368 | 0.6506712 | 0 | 0           | 0 | 0           |
| cov1_6    | 10.9744 | -642.376 | 0.6565346 | 0 | 0.019969378 | 0 | 0           |
| cov1_5    | 11.1285 | -642.454 | 0.6582076 | 0 | 0.15904414  | 0 | 0           |
| cov1_11   | 11.2829 | -642.531 | 0.6580728 | 0 | 0.1278485   | 0 | 0           |
| cov3_11   | 11.9688 | -642.874 | 0.6469306 | 0 | 0           | 0 | 0           |
| cov3_5    | 12.3522 | -643.065 | 0.6504844 | 0 | 0           | 0 | 0           |
| cov4_7_10 | 12.5577 | -639.563 | 0.6564469 | 0 | 0           | 0 | 0           |
| cov4_7_9  | 12.5651 | -639.567 | 0.6556015 | 0 | 0           | 0 | 0           |
| cov4_8_10 | 12.6329 | -639.601 | 0.6564169 | 0 | 0           | 0 | 0           |
| cov4_8_9  | 12.6404 | -639.605 | 0.6555715 | 0 | 0           | 0 | 0           |
| cov5_11   | 12.6742 | -643.226 | 0.6516813 | 0 | 0           | 0 | 0           |
| cov2_7_9  | 12.9178 | -639.744 | 0.6557239 | 0 | 0           | 0 | 0.085102598 |
| cov2_7_10 | 12.9265 | -639.748 | 0.6564093 | 0 | 0           | 0 | 0.085946385 |
| cov2_8_9  | 13.0034 | -639.786 | 0.6556802 | 0 | 0           | 0 | 0.085164049 |
| cov2_8_10 | 13.0122 | -639.791 | 0.6563698 | 0 | 0           | 0 | 0.086008003 |
| cov2_3_10 | 13.5992 | -640.084 | 0.6532595 | 0 | 0           | 0 | 0.092468118 |
| cov3_4_10 | 13.6056 | -640.087 | 0.6538453 | 0 | 0           | 0 | 0           |
| cov2_3_9  | 13.6146 | -640.092 | 0.6523969 | 0 | 0           | 0 | 0.091531155 |
| cov3_4_9  | 13.6327 | -640.101 | 0.6528844 | 0 | 0           | 0 | 0           |
| cov6_7_9  | 13.6867 | -640.128 | 0.658391  | 0 | 0           | 0 | 0           |
| cov6_7_10 | 13.6934 | -640.131 | 0.6591368 | 0 | 0           | 0 | 0           |
| cov5_7_9  | 13.7384 | -640.154 | 0.6572537 | 0 | 0           | 0 | 0           |
| cov5_7_10 | 13.7401 | -640.155 | 0.6581338 | 0 | 0           | 0 | 0           |
| cov6_8_9  | 13.7783 | -640.174 | 0.6583523 | 0 | 0           | 0 | 0           |
| cov6_8_10 | 13.7851 | -640.177 | 0.6590986 | 0 | 0           | 0 | 0           |
| cov1_7_9  | 13.8058 | -640.188 | 0.6587953 | 0 | 0.059346555 | 0 | 0           |
| cov1_7_10 | 13.8146 | -640.192 | 0.6595753 | 0 | 0.060715052 | 0 | 0           |
| cov5_8_9  | 13.8238 | -640.197 | 0.6572228 | 0 | 0           | 0 | 0           |
| cov5_8_10 | 13.8255 | -640.197 | 0.6581009 | 0 | 0           | 0 | 0           |
| cov1_8_9  | 13.8906 | -640.23  | 0.6587627 | 0 | 0.059468245 | 0 | 0           |
| cov1_8_10 | 13.8993 | -640.234 | 0.659546  | 0 | 0.06084196  | 0 | 0           |
| cov7_9_11 | 13.9705 | -640.27  | 0.6555767 | 0 | 0           | 0 | 0           |

|            |         |          |           |   |              |   |              |
|------------|---------|----------|-----------|---|--------------|---|--------------|
| cov7_10_11 | 13.9891 | -640.279 | 0.656349  | 0 | 0            | 0 | 0            |
| cov4_5_9   | 14.0113 | -640.29  | 0.653505  | 0 | 0            | 0 | 0            |
| cov4_5_10  | 14.0301 | -640.3   | 0.6544266 | 0 | 0            | 0 | 0            |
| cov8_9_11  | 14.0663 | -640.318 | 0.6555457 | 0 | 0            | 0 | 0            |
| cov8_10_11 | 14.0851 | -640.327 | 0.6563057 | 0 | 0            | 0 | 0            |
| cov2_7_8   | 14.371  | -640.47  | 0.6524691 | 0 | 0            | 0 | 0.11833126   |
| cov2_5_7   | 14.3906 | -640.48  | 0.6515545 | 0 | 0            | 0 | 0.14014519   |
| cov3_6_10  | 14.4072 | -640.488 | 0.6560712 | 0 | 0            | 0 | 0            |
| cov2_6_7   | 14.4124 | -640.491 | 0.6537545 | 0 | 0            | 0 | 0.095065444  |
| cov3_6_9   | 14.4265 | -640.498 | 0.6551801 | 0 | 0            | 0 | 0            |
| cov7_8_9   | 14.4305 | -640.5   | 0.6558043 | 0 | 0            | 0 | 0            |
| cov2_4_7   | 14.4424 | -640.506 | 0.6523244 | 0 | 0            | 0 | 0.09821861   |
| cov2_3_7   | 14.4734 | -640.521 | 0.6529621 | 0 | 0            | 0 | 0.11575049   |
| cov2_5_8   | 14.4788 | -640.524 | 0.6515073 | 0 | 0            | 0 | 0.14016513   |
| cov4_10_11 | 14.4792 | -640.524 | 0.6571087 | 0 | 0            | 0 | 0            |
| cov4_9_11  | 14.4816 | -640.525 | 0.6562087 | 0 | 0            | 0 | 0            |
| cov7_8_10  | 14.4848 | -640.527 | 0.6566415 | 0 | 0            | 0 | 0            |
| cov2_7_11  | 14.4962 | -640.533 | 0.6523367 | 0 | 0            | 0 | 0.11482475   |
| cov1_2_7   | 14.4991 | -640.534 | 0.6522021 | 0 | -0.003255185 | 0 | 0.12093802   |
| cov2_6_8   | 14.5022 | -640.536 | 0.6536932 | 0 | 0            | 0 | 0.095446783  |
| cov1_4_10  | 14.5166 | -640.543 | 0.6549183 | 0 | -0.038743626 | 0 | 0            |
| cov1_4_9   | 14.5181 | -640.544 | 0.6539167 | 0 | -0.039995678 | 0 | 0            |
| cov2_4_8   | 14.5271 | -640.548 | 0.6522599 | 0 | 0            | 0 | 0.097812768  |
| cov1_3_10  | 14.5401 | -640.555 | 0.6564821 | 0 | 0.068039611  | 0 | 0            |
| cov3_7_9   | 14.5472 | -640.558 | 0.6549779 | 0 | 0            | 0 | 0            |
| cov1_3_9   | 14.5579 | -640.564 | 0.6555639 | 0 | 0.066518594  | 0 | 0            |
| cov7_9_10  | 14.5676 | -640.568 | 0.6559231 | 0 | 0            | 0 | 0            |
| cov2_3_8   | 14.5698 | -640.57  | 0.6528034 | 0 | 0            | 0 | 0.11629666   |
| cov2_8_11  | 14.5845 | -640.577 | 0.6523028 | 0 | 0            | 0 | 0.11528643   |
| cov1_2_8   | 14.5867 | -640.578 | 0.6521645 | 0 | -0.003036446 | 0 | 0.12084072   |
| cov3_7_10  | 14.5984 | -640.584 | 0.6558048 | 0 | 0            | 0 | 0            |
| cov3_8_9   | 14.6234 | -640.596 | 0.6548074 | 0 | 0            | 0 | 0            |
| cov4_6_10  | 14.6377 | -640.603 | 0.6561783 | 0 | 0            | 0 | 0            |
| cov4_6_9   | 14.6443 | -640.607 | 0.6552463 | 0 | 0            | 0 | 0            |
| cov4_9_10  | 14.6453 | -640.607 | 0.6564019 | 0 | 0            | 0 | 0            |
| cov8_9_10  | 14.6557 | -640.613 | 0.6559014 | 0 | 0            | 0 | 0            |
| cov2_4_10  | 14.6638 | -640.617 | 0.6567463 | 0 | 0            | 0 | -0.001978858 |
| cov2_4_9   | 14.674  | -640.622 | 0.6558921 | 0 | 0            | 0 | -0.001500367 |
| cov3_8_10  | 14.6741 | -640.622 | 0.655652  | 0 | 0            | 0 | 0            |
| cov3_4_7   | 14.7724 | -640.671 | 0.6545926 | 0 | 0            | 0 | 0            |
| cov4_6_7   | 14.8018 | -640.686 | 0.6549906 | 0 | 0            | 0 | 0            |
| cov4_6_8   | 14.8875 | -640.728 | 0.6549109 | 0 | 0            | 0 | 0            |
| cov3_4_8   | 14.8923 | -640.731 | 0.6544092 | 0 | 0            | 0 | 0            |
| cov3_5_10  | 14.893  | -640.731 | 0.6547228 | 0 | 0            | 0 | 0            |
| cov3_5_9   | 14.9068 | -640.738 | 0.6537234 | 0 | 0            | 0 | 0            |
| cov3_10_11 | 14.9725 | -640.771 | 0.6525391 | 0 | 0            | 0 | 0            |
| cov3_9_11  | 14.9752 | -640.772 | 0.6516554 | 0 | 0            | 0 | 0            |



|            |         |          |           |   |              |   |             |
|------------|---------|----------|-----------|---|--------------|---|-------------|
| cov1_4_7   | 15.0644 | -640.817 | 0.6545168 | 0 | 0.048360034  | 0 | 0           |
| cov4_5_7   | 15.0791 | -640.824 | 0.6496623 | 0 | 0            | 0 | 0           |
| cov1_4_8   | 15.1435 | -640.856 | 0.6544919 | 0 | 0.048215983  | 0 | 0           |
| cov4_5_8   | 15.1518 | -640.861 | 0.6495985 | 0 | 0            | 0 | 0           |
| cov4_7_11  | 15.1584 | -640.864 | 0.6513952 | 0 | 0            | 0 | 0           |
| cov6_7_8   | 15.1846 | -640.877 | 0.6571304 | 0 | 0            | 0 | 0           |
| cov4_7_8   | 15.2277 | -640.898 | 0.6516279 | 0 | 0            | 0 | 0           |
| cov4_8_11  | 15.2428 | -640.906 | 0.6513434 | 0 | 0            | 0 | 0           |
| cov5_6_7   | 15.286  | -640.928 | 0.6572995 | 0 | 0            | 0 | 0           |
| cov3_6_7   | 15.3004 | -640.935 | 0.6575984 | 0 | 0            | 0 | 0           |
| cov6_7_11  | 15.3143 | -640.942 | 0.6564859 | 0 | 0            | 0 | 0           |
| cov1_6_7   | 15.3192 | -640.944 | 0.6572135 | 0 | 0.01945279   | 0 | 0           |
| cov2_9_11  | 15.3844 | -640.977 | 0.6562724 | 0 | 0            | 0 | 0.10641295  |
| cov5_6_8   | 15.3852 | -640.977 | 0.6572342 | 0 | 0            | 0 | 0           |
| cov2_10_11 | 15.4066 | -640.988 | 0.6569854 | 0 | 0            | 0 | 0.10689009  |
| cov3_6_8   | 15.4091 | -640.989 | 0.6574286 | 0 | 0            | 0 | 0           |
| cov6_8_11  | 15.4131 | -640.991 | 0.6564332 | 0 | 0            | 0 | 0           |
| cov1_6_8   | 15.4141 | -640.992 | 0.6571643 | 0 | 0.020718019  | 0 | 0           |
| cov1_4_5   | 15.4336 | -641.001 | 0.6544879 | 0 | 0.16655369   | 0 | 0           |
| cov1_2_9   | 15.4949 | -641.032 | 0.6547607 | 0 | -0.024728958 | 0 | 0.10514368  |
| cov3_9_10  | 15.4992 | -641.034 | 0.6526402 | 0 | 0            | 0 | 0           |
| cov1_5_7   | 15.5048 | -641.037 | 0.6584445 | 0 | 0.14139671   | 0 | 0           |
| cov1_2_10  | 15.5155 | -641.042 | 0.6555812 | 0 | -0.022724001 | 0 | 0.10461517  |
| cov2_9_10  | 15.53   | -641.05  | 0.6563055 | 0 | 0            | 0 | 0.08564349  |
| cov1_7_8   | 15.5317 | -641.05  | 0.6574655 | 0 | 0.099258812  | 0 | 0           |
| cov2_6_9   | 15.539  | -641.054 | 0.6560846 | 0 | 0            | 0 | 0.082396545 |
| cov2_5_9   | 15.5392 | -641.054 | 0.6558408 | 0 | 0            | 0 | 0.088514774 |
| cov2_6_10  | 15.5511 | -641.06  | 0.6568605 | 0 | 0            | 0 | 0.082224814 |
| cov2_5_10  | 15.5541 | -641.062 | 0.6565903 | 0 | 0            | 0 | 0.088156376 |
| cov1_5_8   | 15.59   | -641.08  | 0.6584015 | 0 | 0.14158846   | 0 | 0           |
| cov1_3_7   | 15.6086 | -641.089 | 0.6581024 | 0 | 0.095533751  | 0 | 0           |
| cov4_5_6   | 15.6164 | -641.093 | 0.6533606 | 0 | 0            | 0 | 0           |
| cov1_7_11  | 15.6327 | -641.101 | 0.6565965 | 0 | 0.086602437  | 0 | 0           |
| cov1_3_8   | 15.7071 | -641.138 | 0.6579463 | 0 | 0.096164886  | 0 | 0           |
| cov1_8_11  | 15.7213 | -641.145 | 0.6565899 | 0 | 0.087419345  | 0 | 0           |
| cov2_3_5   | 15.838  | -641.204 | 0.6471079 | 0 | 0            | 0 | 0.18185228  |
| cov2_3_6   | 16.1045 | -641.337 | 0.6509455 | 0 | 0            | 0 | 0.097953999 |
| cov6_9_11  | 16.1687 | -641.369 | 0.6595732 | 0 | 0            | 0 | 0           |
| cov5_6_9   | 16.1796 | -641.374 | 0.6585597 | 0 | 0            | 0 | 0           |
| cov6_10_11 | 16.1806 | -641.375 | 0.6603239 | 0 | 0            | 0 | 0           |
| cov5_6_10  | 16.1841 | -641.377 | 0.6593393 | 0 | 0            | 0 | 0           |
| cov6_9_10  | 16.2152 | -641.392 | 0.6592024 | 0 | 0            | 0 | 0           |
| cov1_6_9   | 16.2222 | -641.396 | 0.6589937 | 0 | 0.011765181  | 0 | 0           |
| cov1_6_10  | 16.2312 | -641.4   | 0.6597437 | 0 | 0.012583697  | 0 | 0           |
| cov5_7_11  | 16.2767 | -641.423 | 0.6520296 | 0 | 0            | 0 | 0           |
| cov3_5_7   | 16.2824 | -641.426 | 0.6565352 | 0 | 0            | 0 | 0           |
| cov2_3_11  | 16.2942 | -641.432 | 0.6491945 | 0 | 0            | 0 | 0.13831401  |

|            |         |          |           |   |              |   |             |
|------------|---------|----------|-----------|---|--------------|---|-------------|
| cov1_2_3   | 16.2947 | -641.432 | 0.6495809 | 0 | 0.011271883  | 0 | 0.12344063  |
| cov3_7_11  | 16.3    | -641.435 | 0.6526626 | 0 | 0            | 0 | 0           |
| cov1_9_11  | 16.3012 | -641.435 | 0.6602929 | 0 | 0.080728338  | 0 | 0           |
| cov7_8_11  | 16.3035 | -641.436 | 0.651143  | 0 | 0            | 0 | 0           |
| cov2_3_4   | 16.3042 | -641.437 | 0.6490119 | 0 | 0            | 0 | 0.13091973  |
| cov1_5_9   | 16.3056 | -641.437 | 0.6584523 | 0 | 0.028306774  | 0 | 0           |
| cov1_5_10  | 16.3125 | -641.441 | 0.6592769 | 0 | 0.028187473  | 0 | 0           |
| cov5_9_11  | 16.315  | -641.442 | 0.6579571 | 0 | 0            | 0 | 0           |
| cov1_10_11 | 16.3153 | -641.442 | 0.6615921 | 0 | 0.082150344  | 0 | 0           |
| cov5_9_10  | 16.3162 | -641.443 | 0.6580989 | 0 | 0            | 0 | 0           |
| cov5_10_11 | 16.3222 | -641.446 | 0.6588312 | 0 | 0            | 0 | 0           |
| cov1_9_10  | 16.3528 | -641.461 | 0.6596397 | 0 | 0.062615163  | 0 | 0           |
| cov5_8_11  | 16.3759 | -641.473 | 0.6519854 | 0 | 0            | 0 | 0           |
| cov3_5_8   | 16.4144 | -641.492 | 0.6563283 | 0 | 0            | 0 | 0           |
| cov3_8_11  | 16.4253 | -641.497 | 0.652457  | 0 | 0            | 0 | 0           |
| cov2_4_5   | 16.4471 | -641.508 | 0.6486326 | 0 | 0            | 0 | 0.094448278 |
| cov1_3_5   | 16.4774 | -641.523 | 0.6568751 | 0 | 0.23640577   | 0 | 0           |
| cov3_5_6   | 16.6439 | -641.607 | 0.655074  | 0 | 0            | 0 | 0           |
| cov5_7_8   | 16.7031 | -641.636 | 0.6533888 | 0 | 0            | 0 | 0           |
| cov3_4_6   | 16.7352 | -641.652 | 0.6530235 | 0 | 0            | 0 | 0           |
| cov9_10_11 | 16.9578 | -641.764 | 0.6568305 | 0 | 0            | 0 | 0           |
| cov2_5_6   | 16.9756 | -641.772 | 0.6532942 | 0 | 0            | 0 | 0.11079334  |
| cov1_3_6   | 17.0549 | -641.812 | 0.6544924 | 0 | 0.024618583  | 0 | 0           |
| cov3_4_5   | 17.0741 | -641.822 | 0.647504  | 0 | 0            | 0 | 0           |
| cov3_6_11  | 17.0747 | -641.822 | 0.6546791 | 0 | 0            | 0 | 0           |
| cov2_6_11  | 17.0836 | -641.826 | 0.6547824 | 0 | 0            | 0 | 0.1034043   |
| cov4_5_11  | 17.1038 | -641.837 | 0.6478049 | 0 | 0            | 0 | 0           |
| cov1_3_4   | 17.1044 | -641.837 | 0.6527503 | 0 | 0.068760086  | 0 | 0           |
| cov2_4_6   | 17.1475 | -641.858 | 0.6526945 | 0 | 0            | 0 | 0.058434181 |
| cov2_4_11  | 17.1479 | -641.859 | 0.6516269 | 0 | 0            | 0 | 0.097234304 |
| cov4_6_11  | 17.2063 | -641.888 | 0.6554173 | 0 | 0            | 0 | 0           |
| cov1_2_6   | 17.2311 | -641.9   | 0.6517482 | 0 | -0.059807725 | 0 | 0.11014996  |
| cov1_2_5   | 17.2391 | -641.904 | 0.6532314 | 0 | 0.062394167  | 0 | 0.11772179  |
| cov1_2_4   | 17.2579 | -641.914 | 0.6510791 | 0 | -0.002211702 | 0 | 0.082241806 |
| cov1_4_6   | 17.3384 | -641.954 | 0.6533978 | 0 | -0.031180728 | 0 | 0           |
| cov1_2_11  | 17.3632 | -641.966 | 0.6535689 | 0 | 0.032708663  | 0 | 0.11961718  |
| cov2_5_11  | 17.3645 | -641.967 | 0.651039  | 0 | 0            | 0 | 0.1518973   |
| cov1_3_11  | 17.4894 | -642.029 | 0.6551315 | 0 | 0.12218512   | 0 | 0           |
| cov3_4_11  | 17.5441 | -642.057 | 0.6489695 | 0 | 0            | 0 | 0           |
| cov1_4_11  | 17.5558 | -642.063 | 0.6548282 | 0 | 0.064943179  | 0 | 0           |
| cov3_7_8   | 17.7842 | -642.177 | 0.6533157 | 0 | 0            | 0 | 0           |
| cov1_5_6   | 17.9565 | -642.263 | 0.6579947 | 0 | 0.072836755  | 0 | 0           |
| cov1_6_11  | 18.0503 | -642.31  | 0.6581696 | 0 | 0.041483413  | 0 | 0           |
| cov5_6_11  | 18.0607 | -642.315 | 0.6576567 | 0 | 0            | 0 | 0           |
| cov1_5_11  | 18.252  | -642.411 | 0.6594473 | 0 | 0.179108     | 0 | 0           |
| cov3_5_11  | 19.0589 | -642.814 | 0.6481383 | 0 | 0            | 0 | 0           |
| cov4_5_7_9 | 19.4321 | -639.396 | 0.6535251 | 0 | 0            | 0 | 0           |

|              |         |          |           |   |              |   |             |
|--------------|---------|----------|-----------|---|--------------|---|-------------|
| cov4_5_7_10  | 19.4441 | -639.402 | 0.6544426 | 0 | 0            | 0 | 0           |
| cov4_5_8_9   | 19.502  | -639.431 | 0.6534875 | 0 | 0            | 0 | 0           |
| cov4_5_8_10  | 19.5141 | -639.437 | 0.6544053 | 0 | 0            | 0 | 0           |
| cov4_7_8_10  | 19.626  | -639.493 | 0.6565584 | 0 | 0            | 0 | 0           |
| cov4_7_8_9   | 19.6333 | -639.497 | 0.6557099 | 0 | 0            | 0 | 0           |
| cov1_4_7_10  | 19.6991 | -639.53  | 0.6550617 | 0 | -0.026431191 | 0 | 0           |
| cov1_4_7_9   | 19.701  | -639.53  | 0.6540853 | 0 | -0.027550568 | 0 | 0           |
| cov2_4_7_10  | 19.7224 | -639.541 | 0.6564593 | 0 | 0            | 0 | 0.024483386 |
| cov2_4_7_9   | 19.7282 | -639.544 | 0.6556686 | 0 | 0            | 0 | 0.024908117 |
| cov4_7_9_10  | 19.7501 | -639.555 | 0.6561062 | 0 | 0            | 0 | 0           |
| cov4_6_7_10  | 19.7629 | -639.561 | 0.6562218 | 0 | 0            | 0 | 0           |
| cov3_4_7_10  | 19.7651 | -639.563 | 0.6566158 | 0 | 0            | 0 | 0           |
| cov4_7_10_11 | 19.7657 | -639.563 | 0.6564721 | 0 | 0            | 0 | 0           |
| cov4_6_7_9   | 19.769  | -639.564 | 0.6552998 | 0 | 0            | 0 | 0           |
| cov3_4_7_9   | 19.7714 | -639.566 | 0.6558202 | 0 | 0            | 0 | 0           |
| cov4_7_9_11  | 19.7725 | -639.566 | 0.6556217 | 0 | 0            | 0 | 0           |
| cov1_4_8_10  | 19.7731 | -639.567 | 0.655197  | 0 | -0.026682315 | 0 | 0           |
| cov1_4_8_9   | 19.7751 | -639.568 | 0.6540454 | 0 | -0.027782885 | 0 | 0           |
| cov2_4_8_10  | 19.7996 | -639.58  | 0.6564243 | 0 | 0            | 0 | 0.023923518 |
| cov2_4_8_9   | 19.8055 | -639.583 | 0.6556245 | 0 | 0            | 0 | 0.024352405 |
| cov4_8_9_10  | 19.8253 | -639.593 | 0.6560696 | 0 | 0            | 0 | 0           |
| cov4_6_8_10  | 19.8372 | -639.599 | 0.6561369 | 0 | 0            | 0 | 0           |
| cov4_8_10_11 | 19.8402 | -639.6   | 0.656443  | 0 | 0            | 0 | 0           |
| cov3_4_8_10  | 19.8421 | -639.601 | 0.6564658 | 0 | 0            | 0 | 0           |
| cov4_6_8_9   | 19.8433 | -639.602 | 0.6553658 | 0 | 0            | 0 | 0           |
| cov4_8_9_11  | 19.8469 | -639.603 | 0.6555963 | 0 | 0            | 0 | 0           |
| cov3_4_8_9   | 19.8492 | -639.605 | 0.6556639 | 0 | 0            | 0 | 0           |
| cov2_7_8_9   | 19.9872 | -639.674 | 0.655825  | 0 | 0            | 0 | 0.085015704 |
| cov2_7_8_10  | 19.9961 | -639.678 | 0.6565117 | 0 | 0            | 0 | 0.08594506  |
| cov2_3_7_9   | 20.0422 | -639.701 | 0.6546944 | 0 | 0            | 0 | 0.087011184 |
| cov2_3_7_10  | 20.0444 | -639.702 | 0.6554053 | 0 | 0            | 0 | 0.087930635 |
| cov1_2_7_9   | 20.0483 | -639.704 | 0.6540327 | 0 | -0.03241545  | 0 | 0.11070754  |
| cov1_2_7_10  | 20.0653 | -639.713 | 0.6548473 | 0 | -0.030586393 | 0 | 0.11020272  |
| cov2_3_8_9   | 20.108  | -639.734 | 0.6545635 | 0 | 0            | 0 | 0.087260586 |
| cov2_3_8_10  | 20.1095 | -639.735 | 0.6552721 | 0 | 0            | 0 | 0.088188006 |
| cov2_7_9_10  | 20.1175 | -639.739 | 0.6560377 | 0 | 0            | 0 | 0.085185673 |
| cov2_5_7_9   | 20.1229 | -639.741 | 0.6555357 | 0 | 0            | 0 | 0.089892034 |
| cov2_7_9_11  | 20.1249 | -639.742 | 0.6557474 | 0 | 0            | 0 | 0.087629171 |
| cov2_6_7_9   | 20.1264 | -639.743 | 0.6556144 | 0 | 0            | 0 | 0.087043423 |
| cov2_5_7_10  | 20.1335 | -639.747 | 0.6562707 | 0 | 0            | 0 | 0.089526444 |
| cov2_7_10_11 | 20.1345 | -639.747 | 0.656432  | 0 | 0            | 0 | 0.08793152  |
| cov1_2_8_9   | 20.1351 | -639.748 | 0.6540213 | 0 | -0.032189982 | 0 | 0.1105968   |
| cov2_6_7_10  | 20.1357 | -639.748 | 0.6562757 | 0 | 0            | 0 | 0.086871121 |
| cov1_2_8_10  | 20.152  | -639.756 | 0.6548213 | 0 | -0.030368669 | 0 | 0.11009618  |
| cov2_8_9_10  | 20.2032 | -639.782 | 0.656002  | 0 | 0            | 0 | 0.08524958  |
| cov2_5_8_9   | 20.2087 | -639.784 | 0.6555132 | 0 | 0            | 0 | 0.089866808 |
| cov2_8_9_11  | 20.2099 | -639.785 | 0.6557169 | 0 | 0            | 0 | 0.0880701   |

|              |         |          |           |   |              |   |             |
|--------------|---------|----------|-----------|---|--------------|---|-------------|
| cov2_6_8_9   | 20.2119 | -639.786 | 0.6555762 | 0 | 0            | 0 | 0.087393165 |
| cov2_5_8_10  | 20.2193 | -639.79  | 0.6562663 | 0 | 0            | 0 | 0.089496544 |
| cov2_8_10_11 | 20.2196 | -639.79  | 0.6564011 | 0 | 0            | 0 | 0.08837422  |
| cov2_6_8_10  | 20.2212 | -639.791 | 0.6563038 | 0 | 0            | 0 | 0.087226901 |
| cov3_4_5_9   | 20.2952 | -639.828 | 0.6506874 | 0 | 0            | 0 | 0           |
| cov3_4_5_10  | 20.2986 | -639.829 | 0.6517267 | 0 | 0            | 0 | 0           |
| cov2_3_4_10  | 20.6489 | -640.004 | 0.6536044 | 0 | 0            | 0 | 0.050504652 |
| cov2_3_5_9   | 20.6601 | -640.01  | 0.651209  | 0 | 0            | 0 | 0.12284169  |
| cov2_3_5_10  | 20.6612 | -640.011 | 0.6521001 | 0 | 0            | 0 | 0.12228665  |
| cov2_3_4_9   | 20.6735 | -640.017 | 0.6526641 | 0 | 0            | 0 | 0.050858936 |
| cov6_7_8_9   | 20.7412 | -640.051 | 0.658523  | 0 | 0            | 0 | 0           |
| cov6_7_8_10  | 20.7478 | -640.054 | 0.6592725 | 0 | 0            | 0 | 0           |
| cov1_2_3_10  | 20.7633 | -640.062 | 0.6520818 | 0 | -0.024508689 | 0 | 0.11193794  |
| cov1_2_3_9   | 20.7709 | -640.065 | 0.6510981 | 0 | -0.026596521 | 0 | 0.11257656  |
| cov2_3_10_11 | 20.7891 | -640.075 | 0.6534751 | 0 | 0            | 0 | 0.09983303  |
| cov2_3_9_10  | 20.7919 | -640.076 | 0.6529295 | 0 | 0            | 0 | 0.091736193 |
| cov1_4_5_7   | 20.7929 | -640.076 | 0.6548463 | 0 | 0.15062763   | 0 | 0           |
| cov3_4_9_10  | 20.796  | -640.078 | 0.653502  | 0 | 0            | 0 | 0           |
| cov2_3_9_11  | 20.8003 | -640.08  | 0.6526344 | 0 | 0            | 0 | 0.0996256   |
| cov1_3_4_10  | 20.8052 | -640.083 | 0.6533889 | 0 | -0.01039904  | 0 | 0           |
| cov3_4_6_10  | 20.8065 | -640.083 | 0.6541615 | 0 | 0            | 0 | 0           |
| cov2_3_6_10  | 20.8068 | -640.083 | 0.6534129 | 0 | 0            | 0 | 0.08931636  |
| cov3_4_10_11 | 20.8074 | -640.084 | 0.6539951 | 0 | 0            | 0 | 0           |
| cov5_7_8_9   | 20.8075 | -640.084 | 0.6573609 | 0 | 0            | 0 | 0           |
| cov5_7_8_10  | 20.8094 | -640.085 | 0.6582418 | 0 | 0            | 0 | 0           |
| cov2_3_6_9   | 20.8232 | -640.092 | 0.6524737 | 0 | 0            | 0 | 0.089520883 |
| cov1_3_4_9   | 20.8295 | -640.095 | 0.6523467 | 0 | -0.011796257 | 0 | 0           |
| cov5_6_7_9   | 20.8312 | -640.096 | 0.6581159 | 0 | 0            | 0 | 0           |
| cov5_6_7_10  | 20.8319 | -640.096 | 0.6589056 | 0 | 0            | 0 | 0           |
| cov3_4_9_11  | 20.8321 | -640.096 | 0.653048  | 0 | 0            | 0 | 0           |
| cov3_6_7_9   | 20.8324 | -640.096 | 0.6574754 | 0 | 0            | 0 | 0           |
| cov3_6_7_10  | 20.8328 | -640.096 | 0.658227  | 0 | 0            | 0 | 0           |
| cov3_4_6_9   | 20.8356 | -640.098 | 0.653174  | 0 | 0            | 0 | 0           |
| cov1_4_5_8   | 20.8609 | -640.11  | 0.6548032 | 0 | 0.150868     | 0 | 0           |
| cov6_7_9_11  | 20.868  | -640.114 | 0.6578734 | 0 | 0            | 0 | 0           |
| cov6_7_10_11 | 20.8732 | -640.117 | 0.6586085 | 0 | 0            | 0 | 0           |
| cov1_7_8_9   | 20.8742 | -640.117 | 0.6589006 | 0 | 0.059318646  | 0 | 0           |
| cov4_5_6_7   | 20.8778 | -640.119 | 0.6538592 | 0 | 0            | 0 | 0           |
| cov1_7_8_10  | 20.8832 | -640.122 | 0.6596829 | 0 | 0.060694012  | 0 | 0           |
| cov6_7_9_10  | 20.8844 | -640.122 | 0.65874   | 0 | 0            | 0 | 0           |
| cov1_6_7_9   | 20.8896 | -640.125 | 0.6585484 | 0 | 0.012026928  | 0 | 0           |
| cov1_6_7_10  | 20.8954 | -640.128 | 0.659302  | 0 | 0.012774401  | 0 | 0           |
| cov5_7_9_11  | 20.8986 | -640.129 | 0.6568395 | 0 | 0            | 0 | 0           |
| cov5_7_10_11 | 20.8993 | -640.13  | 0.6576841 | 0 | 0            | 0 | 0           |
| cov3_6_8_10  | 20.905  | -640.132 | 0.6580787 | 0 | 0            | 0 | 0           |
| cov3_6_8_9   | 20.9053 | -640.133 | 0.6573211 | 0 | 0            | 0 | 0           |
| cov5_6_8_9   | 20.9201 | -640.14  | 0.6580697 | 0 | 0            | 0 | 0           |

|              |         |          |           |   |             |   |             |
|--------------|---------|----------|-----------|---|-------------|---|-------------|
| cov5_6_8_10  | 20.9208 | -640.14  | 0.65887   | 0 | 0           | 0 | 0           |
| cov5_7_9_10  | 20.9263 | -640.143 | 0.6577391 | 0 | 0           | 0 | 0           |
| cov1_5_7_9   | 20.9318 | -640.146 | 0.6578464 | 0 | 0.019443082 | 0 | 0           |
| cov1_5_7_10  | 20.934  | -640.147 | 0.6586753 | 0 | 0.019151521 | 0 | 0           |
| cov3_5_7_9   | 20.9476 | -640.154 | 0.6571971 | 0 | 0           | 0 | 0           |
| cov3_5_7_10  | 20.949  | -640.154 | 0.6580369 | 0 | 0           | 0 | 0           |
| cov1_3_7_9   | 20.9536 | -640.157 | 0.6578984 | 0 | 0.060948635 | 0 | 0           |
| cov1_3_7_10  | 20.9561 | -640.158 | 0.6586703 | 0 | 0.062425898 | 0 | 0           |
| cov4_5_6_8   | 20.9588 | -640.159 | 0.6537942 | 0 | 0           | 0 | 0           |
| cov6_8_9_11  | 20.9614 | -640.161 | 0.6578495 | 0 | 0           | 0 | 0           |
| cov6_8_10_11 | 20.9667 | -640.163 | 0.6585845 | 0 | 0           | 0 | 0           |
| cov6_8_9_10  | 20.976  | -640.168 | 0.6587066 | 0 | 0           | 0 | 0           |
| cov1_6_8_9   | 20.9799 | -640.17  | 0.6585246 | 0 | 0.013220479 | 0 | 0           |
| cov1_7_9_11  | 20.9806 | -640.17  | 0.6580058 | 0 | 0.045319269 | 0 | 0           |
| cov1_6_8_10  | 20.9857 | -640.173 | 0.6592913 | 0 | 0.013966585 | 0 | 0           |
| cov5_8_9_11  | 20.9874 | -640.174 | 0.6568208 | 0 | 0           | 0 | 0           |
| cov5_8_10_11 | 20.9881 | -640.174 | 0.657666  | 0 | 0           | 0 | 0           |
| cov1_7_10_11 | 20.9882 | -640.174 | 0.6587754 | 0 | 0.046443455 | 0 | 0           |
| cov1_7_9_10  | 21.003  | -640.181 | 0.6591488 | 0 | 0.059602993 | 0 | 0           |
| cov5_8_9_10  | 21.0116 | -640.186 | 0.657687  | 0 | 0           | 0 | 0           |
| cov1_5_8_9   | 21.0168 | -640.188 | 0.6578196 | 0 | 0.019635825 | 0 | 0           |
| cov1_5_8_10  | 21.0191 | -640.19  | 0.6586533 | 0 | 0.019354723 | 0 | 0           |
| cov1_3_8_9   | 21.0213 | -640.191 | 0.6577512 | 0 | 0.061269586 | 0 | 0           |
| cov1_3_8_10  | 21.0229 | -640.191 | 0.6585376 | 0 | 0.062743495 | 0 | 0           |
| cov3_5_8_9   | 21.0309 | -640.195 | 0.6570131 | 0 | 0           | 0 | 0           |
| cov3_5_8_10  | 21.0318 | -640.196 | 0.6578637 | 0 | 0           | 0 | 0           |
| cov7_8_9_11  | 21.0398 | -640.2   | 0.6557021 | 0 | 0           | 0 | 0           |
| cov7_8_10_11 | 21.0586 | -640.209 | 0.6564511 | 0 | 0           | 0 | 0           |
| cov1_8_9_11  | 21.0688 | -640.214 | 0.658017  | 0 | 0.046162292 | 0 | 0           |
| cov1_8_10_11 | 21.0764 | -640.218 | 0.6587855 | 0 | 0.047286762 | 0 | 0           |
| cov1_8_9_10  | 21.0878 | -640.224 | 0.6591221 | 0 | 0.059728429 | 0 | 0           |
| cov4_5_6_9   | 21.0884 | -640.224 | 0.6544863 | 0 | 0           | 0 | 0           |
| cov4_5_6_10  | 21.1037 | -640.232 | 0.6553162 | 0 | 0           | 0 | 0           |
| cov1_4_5_9   | 21.1092 | -640.235 | 0.6548497 | 0 | 0.051557969 | 0 | 0           |
| cov1_4_5_10  | 21.1272 | -640.244 | 0.6556594 | 0 | 0.051813663 | 0 | 0           |
| cov3_7_9_11  | 21.1278 | -640.244 | 0.6546056 | 0 | 0           | 0 | 0           |
| cov3_7_10_11 | 21.1407 | -640.25  | 0.6553597 | 0 | 0           | 0 | 0           |
| cov7_9_10_11 | 21.1685 | -640.264 | 0.6559044 | 0 | 0           | 0 | 0           |
| cov4_5_9_10  | 21.2049 | -640.282 | 0.653919  | 0 | 0           | 0 | 0           |
| cov2_4_5_9   | 21.2071 | -640.284 | 0.6534313 | 0 | 0           | 0 | 0.013460527 |
| cov3_8_9_11  | 21.2074 | -640.284 | 0.6544416 | 0 | 0           | 0 | 0           |
| cov4_5_9_11  | 21.213  | -640.286 | 0.6536977 | 0 | 0           | 0 | 0           |
| cov2_4_5_7   | 21.2162 | -640.288 | 0.6498926 | 0 | 0           | 0 | 0.10747953  |
| cov3_8_10_11 | 21.2198 | -640.29  | 0.6551972 | 0 | 0           | 0 | 0           |
| cov2_4_5_10  | 21.2267 | -640.293 | 0.6543414 | 0 | 0           | 0 | 0.013069592 |
| cov4_5_10_11 | 21.2323 | -640.296 | 0.6546326 | 0 | 0           | 0 | 0           |
| cov8_9_10_11 | 21.2643 | -640.312 | 0.6558697 | 0 | 0           | 0 | 0           |

|              |         |          |           |   |              |   |             |
|--------------|---------|----------|-----------|---|--------------|---|-------------|
| cov2_4_5_8   | 21.2955 | -640.328 | 0.6498346 | 0 | 0            | 0 | 0.10713311  |
| cov2_5_6_7   | 21.3228 | -640.341 | 0.6536614 | 0 | 0            | 0 | 0.11257845  |
| cov1_3_4_5   | 21.3429 | -640.351 | 0.6535673 | 0 | 0.23124028   | 0 | 0           |
| cov2_5_6_8   | 21.4161 | -640.388 | 0.6535681 | 0 | 0            | 0 | 0.11286569  |
| cov2_5_7_8   | 21.4698 | -640.415 | 0.6516319 | 0 | 0            | 0 | 0.1403414   |
| cov1_2_6_7   | 21.4791 | -640.42  | 0.6521798 | 0 | -0.064448476 | 0 | 0.11555328  |
| cov2_6_7_8   | 21.4865 | -640.423 | 0.6538895 | 0 | 0            | 0 | 0.094351487 |
| cov2_4_7_8   | 21.5231 | -640.442 | 0.652396  | 0 | 0            | 0 | 0.098381073 |
| cov1_2_5_7   | 21.5293 | -640.445 | 0.653243  | 0 | 0.040992615  | 0 | 0.1222036   |
| cov2_3_4_7   | 21.5531 | -640.457 | 0.653554  | 0 | 0            | 0 | 0.078689749 |
| cov2_3_7_8   | 21.5566 | -640.458 | 0.6530071 | 0 | 0            | 0 | 0.11602741  |
| cov2_5_7_11  | 21.5637 | -640.462 | 0.6512157 | 0 | 0            | 0 | 0.13354972  |
| cov1_2_6_8   | 21.5745 | -640.467 | 0.6521379 | 0 | -0.063148971 | 0 | 0.11553752  |
| cov2_7_8_11  | 21.5768 | -640.468 | 0.6524182 | 0 | 0            | 0 | 0.11500865  |
| cov1_2_7_8   | 21.5795 | -640.47  | 0.6522879 | 0 | -0.003184977 | 0 | 0.12098531  |
| cov2_4_6_7   | 21.5818 | -640.471 | 0.6535748 | 0 | 0            | 0 | 0.080472821 |
| cov2_3_5_7   | 21.5989 | -640.479 | 0.6517105 | 0 | 0            | 0 | 0.13868308  |
| cov3_6_9_10  | 21.6007 | -640.48  | 0.6557238 | 0 | 0            | 0 | 0           |
| cov3_5_6_10  | 21.6014 | -640.481 | 0.6561602 | 0 | 0            | 0 | 0           |
| cov1_3_6_10  | 21.6034 | -640.482 | 0.6562795 | 0 | 0.0170919    | 0 | 0           |
| cov2_3_6_7   | 21.6051 | -640.483 | 0.6541515 | 0 | 0            | 0 | 0.094271117 |
| cov3_7_8_9   | 21.6091 | -640.485 | 0.6550492 | 0 | 0            | 0 | 0           |
| cov3_6_10_11 | 21.6151 | -640.488 | 0.6559268 | 0 | 0            | 0 | 0           |
| cov2_6_7_11  | 21.6156 | -640.488 | 0.6540054 | 0 | 0            | 0 | 0.096924786 |
| cov1_2_5_8   | 21.6166 | -640.488 | 0.6532069 | 0 | 0.041261803  | 0 | 0.12210451  |
| cov3_5_6_9   | 21.6172 | -640.489 | 0.6552995 | 0 | 0            | 0 | 0           |
| cov1_3_6_9   | 21.6242 | -640.492 | 0.6553799 | 0 | 0.016145675  | 0 | 0           |
| cov7_8_9_10  | 21.6334 | -640.497 | 0.6560429 | 0 | 0            | 0 | 0           |
| cov3_6_9_11  | 21.635  | -640.497 | 0.6550651 | 0 | 0            | 0 | 0           |
| cov1_2_4_7   | 21.6468 | -640.503 | 0.6518563 | 0 | -0.008071102 | 0 | 0.10395374  |
| cov2_4_7_11  | 21.6503 | -640.505 | 0.6522677 | 0 | 0            | 0 | 0.096347168 |
| cov2_5_8_11  | 21.6547 | -640.507 | 0.6511822 | 0 | 0            | 0 | 0.13383545  |
| cov2_3_4_8   | 21.6562 | -640.508 | 0.6533766 | 0 | 0            | 0 | 0.080212431 |
| cov3_7_8_10  | 21.6603 | -640.51  | 0.6558801 | 0 | 0            | 0 | 0           |
| cov1_4_9_11  | 21.6611 | -640.51  | 0.6551046 | 0 | -0.021454915 | 0 | 0           |
| cov1_4_10_11 | 21.6613 | -640.511 | 0.6560238 | 0 | -0.020437108 | 0 | 0           |
| cov4_9_10_11 | 21.663  | -640.511 | 0.6567161 | 0 | 0            | 0 | 0           |
| cov2_4_10_11 | 21.6648 | -640.512 | 0.6571431 | 0 | 0            | 0 | 0.018988536 |
| cov2_4_9_11  | 21.6649 | -640.512 | 0.6562843 | 0 | 0            | 0 | 0.019859473 |
| cov2_4_6_8   | 21.6689 | -640.514 | 0.6534978 | 0 | 0            | 0 | 0.080363973 |
| cov1_2_4_9   | 21.6755 | -640.518 | 0.6532207 | 0 | -0.054218476 | 0 | 0.030584533 |
| cov1_4_6_10  | 21.6783 | -640.519 | 0.654908  | 0 | -0.066112846 | 0 | 0           |
| cov1_2_4_10  | 21.6792 | -640.52  | 0.6542375 | 0 | -0.052220085 | 0 | 0.029077353 |
| cov2_3_7_11  | 21.6801 | -640.52  | 0.6529126 | 0 | 0            | 0 | 0.11288198  |
| cov1_2_3_7   | 21.6809 | -640.52  | 0.6526949 | 0 | -0.004981495 | 0 | 0.11984975  |
| cov1_4_6_9   | 21.6817 | -640.521 | 0.6539219 | 0 | -0.066761361 | 0 | 0           |
| cov4_6_10_11 | 21.6846 | -640.522 | 0.6573913 | 0 | 0            | 0 | 0           |

|              |         |          |           |   |              |   |              |
|--------------|---------|----------|-----------|---|--------------|---|--------------|
| cov1_3_5_10  | 21.6853 | -640.523 | 0.6571202 | 0 | 0.10595528   | 0 | 0            |
| cov4_6_9_11  | 21.688  | -640.524 | 0.6562215 | 0 | 0            | 0 | 0            |
| cov2_3_5_8   | 21.6881 | -640.524 | 0.6515053 | 0 | 0            | 0 | 0.14018205   |
| cov1_3_5_9   | 21.6965 | -640.528 | 0.6562889 | 0 | 0.10626331   | 0 | 0            |
| cov1_4_9_10  | 21.6976 | -640.529 | 0.6544288 | 0 | -0.040124499 | 0 | 0            |
| cov1_2_7_11  | 21.7006 | -640.53  | 0.6517755 | 0 | -0.009311133 | 0 | 0.1202208    |
| cov2_3_6_8   | 21.7018 | -640.531 | 0.6539809 | 0 | 0            | 0 | 0.094870216  |
| cov2_6_8_11  | 21.7043 | -640.532 | 0.6539564 | 0 | 0            | 0 | 0.097440597  |
| cov1_3_9_10  | 21.7313 | -640.546 | 0.6561132 | 0 | 0.066993969  | 0 | 0            |
| cov1_2_4_8   | 21.7316 | -640.546 | 0.6518085 | 0 | -0.007964039 | 0 | 0.10347244   |
| cov2_4_8_11  | 21.7354 | -640.548 | 0.6522324 | 0 | 0            | 0 | 0.096286592  |
| cov3_4_5_7   | 21.7413 | -640.551 | 0.6527012 | 0 | 0            | 0 | 0            |
| cov3_7_9_10  | 21.7479 | -640.554 | 0.6552208 | 0 | 0            | 0 | 0            |
| cov1_3_10_11 | 21.7483 | -640.554 | 0.6563147 | 0 | 0.06553091   | 0 | 0            |
| cov4_5_7_11  | 21.7662 | -640.563 | 0.6482598 | 0 | 0            | 0 | 0            |
| cov1_3_9_11  | 21.7665 | -640.563 | 0.6554274 | 0 | 0.064494377  | 0 | 0            |
| cov3_4_6_7   | 21.7724 | -640.566 | 0.6560541 | 0 | 0            | 0 | 0            |
| cov2_3_8_11  | 21.777  | -640.568 | 0.6527531 | 0 | 0            | 0 | 0.11372251   |
| cov1_2_3_8   | 21.7776 | -640.569 | 0.6525609 | 0 | -0.004436239 | 0 | 0.11994945   |
| cov1_2_8_11  | 21.7898 | -640.575 | 0.6517787 | 0 | -0.008466707 | 0 | 0.12019502   |
| cov3_8_9_10  | 21.8236 | -640.592 | 0.6550703 | 0 | 0            | 0 | 0            |
| cov4_6_9_10  | 21.8242 | -640.592 | 0.6557619 | 0 | 0            | 0 | 0            |
| cov2_4_6_10  | 21.8438 | -640.602 | 0.6560751 | 0 | 0            | 0 | 0.007172698  |
| cov4_5_8_11  | 21.8485 | -640.604 | 0.6482285 | 0 | 0            | 0 | 0            |
| cov2_4_6_9   | 21.8492 | -640.605 | 0.6551332 | 0 | 0            | 0 | 0.00834411   |
| cov2_4_9_10  | 21.8542 | -640.607 | 0.656407  | 0 | 0            | 0 | -0.002484504 |
| cov3_4_5_8   | 21.855  | -640.607 | 0.6525069 | 0 | 0            | 0 | 0            |
| cov3_4_7_8   | 21.8676 | -640.614 | 0.6546289 | 0 | 0            | 0 | 0            |
| cov4_6_7_8   | 21.8697 | -640.615 | 0.6551259 | 0 | 0            | 0 | 0            |
| cov3_4_6_8   | 21.8867 | -640.623 | 0.6558913 | 0 | 0            | 0 | 0            |
| cov3_4_5_6   | 21.9021 | -640.631 | 0.6522385 | 0 | 0            | 0 | 0            |
| cov3_4_7_11  | 21.934  | -640.647 | 0.6542696 | 0 | 0            | 0 | 0            |
| cov1_3_4_7   | 21.9355 | -640.648 | 0.6555095 | 0 | 0.021687295  | 0 | 0            |
| cov1_4_6_7   | 21.9926 | -640.676 | 0.654615  | 0 | -0.021712339 | 0 | 0            |
| cov4_6_7_11  | 22.0103 | -640.685 | 0.654892  | 0 | 0            | 0 | 0            |
| cov3_5_10_11 | 22.0268 | -640.693 | 0.6538647 | 0 | 0            | 0 | 0            |
| cov3_5_9_11  | 22.0432 | -640.702 | 0.6529042 | 0 | 0            | 0 | 0            |
| cov1_3_4_8   | 22.0496 | -640.705 | 0.6553834 | 0 | 0.022999273  | 0 | 0            |
| cov3_4_8_11  | 22.0538 | -640.707 | 0.6540611 | 0 | 0            | 0 | 0            |
| cov3_5_9_10  | 22.0736 | -640.717 | 0.6543266 | 0 | 0            | 0 | 0            |
| cov1_4_6_8   | 22.0798 | -640.72  | 0.6545594 | 0 | -0.020789054 | 0 | 0            |
| cov4_6_8_11  | 22.0964 | -640.728 | 0.6548351 | 0 | 0            | 0 | 0            |
| cov1_4_7_8   | 22.1458 | -640.753 | 0.6546351 | 0 | 0.048442529  | 0 | 0            |
| cov3_9_10_11 | 22.1497 | -640.755 | 0.6521445 | 0 | 0            | 0 | 0            |
| cov4_5_7_8   | 22.1595 | -640.76  | 0.6497396 | 0 | 0            | 0 | 0            |
| cov2_3_5_6   | 22.1652 | -640.763 | 0.6504393 | 0 | 0            | 0 | 0.13721139   |
| cov4_7_8_11  | 22.2413 | -640.801 | 0.6514895 | 0 | 0            | 0 | 0            |

|              |         |          |           |   |              |   |              |
|--------------|---------|----------|-----------|---|--------------|---|--------------|
| cov1_4_7_11  | 22.2557 | -640.808 | 0.6538939 | 0 | 0.03863441   | 0 | 0            |
| cov1_4_8_11  | 22.3371 | -640.849 | 0.6538662 | 0 | 0.039135689  | 0 | 0            |
| cov5_6_7_8   | 22.3386 | -640.849 | 0.6574387 | 0 | 0            | 0 | 0            |
| cov1_2_3_5   | 22.3523 | -640.856 | 0.6517534 | 0 | 0.13467206   | 0 | 0.1301741    |
| cov3_6_7_8   | 22.3628 | -640.861 | 0.657672  | 0 | 0            | 0 | 0            |
| cov6_7_8_11  | 22.3747 | -640.867 | 0.6566297 | 0 | 0            | 0 | 0            |
| cov1_6_7_8   | 22.3807 | -640.87  | 0.6573082 | 0 | 0.017294335  | 0 | 0            |
| cov1_5_6_7   | 22.3866 | -640.873 | 0.6582232 | 0 | 0.06139671   | 0 | 0            |
| cov5_6_7_11  | 22.4526 | -640.906 | 0.6566239 | 0 | 0            | 0 | 0            |
| cov1_5_6_8   | 22.4808 | -640.92  | 0.6581807 | 0 | 0.062752624  | 0 | 0            |
| cov1_4_5_6   | 22.482  | -640.921 | 0.6546098 | 0 | 0.10977141   | 0 | 0            |
| cov3_5_6_7   | 22.4869 | -640.923 | 0.6575586 | 0 | 0            | 0 | 0            |
| cov3_6_7_11  | 22.4889 | -640.924 | 0.6570809 | 0 | 0            | 0 | 0            |
| cov1_3_6_7   | 22.4946 | -640.927 | 0.6577804 | 0 | 0.01839509   | 0 | 0            |
| cov1_6_7_11  | 22.5172 | -640.939 | 0.6567352 | 0 | 0.012928447  | 0 | 0            |
| cov2_6_9_11  | 22.5419 | -640.951 | 0.6572221 | 0 | 0            | 0 | 0.093333733  |
| cov5_6_8_11  | 22.5545 | -640.957 | 0.6565684 | 0 | 0            | 0 | 0            |
| cov2_6_10_11 | 22.5581 | -640.959 | 0.6579574 | 0 | 0            | 0 | 0.093060541  |
| cov1_4_5_11  | 22.565  | -640.962 | 0.655779  | 0 | 0.18562995   | 0 | 0            |
| cov2_5_9_11  | 22.5805 | -640.97  | 0.6565977 | 0 | 0            | 0 | 0.0997003    |
| cov1_5_7_8   | 22.5829 | -640.971 | 0.6585449 | 0 | 0.14176195   | 0 | 0            |
| cov2_9_10_11 | 22.5855 | -640.973 | 0.6565565 | 0 | 0            | 0 | 0.10632834   |
| cov3_5_6_8   | 22.5914 | -640.976 | 0.6573896 | 0 | 0            | 0 | 0            |
| cov1_2_9_11  | 22.5932 | -640.977 | 0.6562837 | 0 | -0.003149218 | 0 | 0.1081948    |
| cov2_5_10_11 | 22.5988 | -640.979 | 0.6573827 | 0 | 0            | 0 | 0.09921365   |
| cov3_6_8_11  | 22.5989 | -640.979 | 0.656924  | 0 | 0            | 0 | 0            |
| cov1_3_6_8   | 22.6006 | -640.98  | 0.6576448 | 0 | 0.019976734  | 0 | 0            |
| cov1_6_8_11  | 22.614  | -640.987 | 0.6567306 | 0 | 0.014787322  | 0 | 0            |
| cov1_2_10_11 | 22.6158 | -640.988 | 0.656851  | 0 | -0.00135754  | 0 | 0.10766458   |
| cov1_2_6_9   | 22.6161 | -640.988 | 0.6545811 | 0 | -0.06195864  | 0 | 0.10212507   |
| cov1_2_6_10  | 22.6334 | -640.997 | 0.6553852 | 0 | -0.060747857 | 0 | 0.10156225   |
| cov1_2_4_5   | 22.6351 | -640.998 | 0.6548819 | 0 | 0.17762234   | 0 | -0.013051614 |
| cov1_2_5_9   | 22.67   | -641.015 | 0.6542703 | 0 | -0.049154664 | 0 | 0.10371612   |
| cov1_5_7_11  | 22.685  | -641.022 | 0.6576338 | 0 | 0.12874454   | 0 | 0            |
| cov1_2_5_10  | 22.6871 | -641.024 | 0.6550903 | 0 | -0.048481618 | 0 | 0.10310538   |
| cov1_3_7_8   | 22.6929 | -641.026 | 0.6581515 | 0 | 0.095755004  | 0 | 0            |
| cov1_2_9_10  | 22.695  | -641.027 | 0.6550881 | 0 | -0.024289547 | 0 | 0.1048801    |
| cov1_3_5_7   | 22.7133 | -641.037 | 0.6583915 | 0 | 0.14447653   | 0 | 0            |
| cov1_7_8_11  | 22.7136 | -641.037 | 0.6567067 | 0 | 0.086755338  | 0 | 0            |
| cov2_3_4_5   | 22.7234 | -641.042 | 0.6462912 | 0 | 0            | 0 | 0.14388076   |
| cov2_6_9_10  | 22.7372 | -641.049 | 0.6564251 | 0 | 0            | 0 | 0.082262202  |
| cov2_5_9_10  | 22.7384 | -641.049 | 0.6561789 | 0 | 0            | 0 | 0.087912284  |
| cov2_5_6_9   | 22.742  | -641.051 | 0.6560589 | 0 | 0            | 0 | 0.08539563   |
| cov2_5_6_10  | 22.7558 | -641.058 | 0.6568174 | 0 | 0            | 0 | 0.084819386  |
| cov2_4_5_6   | 22.768  | -641.064 | 0.6526338 | 0 | 0            | 0 | 0.029790269  |
| cov1_5_8_11  | 22.7733 | -641.067 | 0.65768   | 0 | 0.12961155   | 0 | 0            |
| cov1_3_7_11  | 22.7909 | -641.075 | 0.6573359 | 0 | 0.083204441  | 0 | 0            |



|              |         |          |           |   |              |   |             |
|--------------|---------|----------|-----------|---|--------------|---|-------------|
| cov1_3_5_8   | 22.7948 | -641.077 | 0.6582782 | 0 | 0.14883952   | 0 | 0           |
| cov4_5_6_11  | 22.8065 | -641.083 | 0.6538757 | 0 | 0            | 0 | 0           |
| cov1_3_8_11  | 22.8923 | -641.126 | 0.6572241 | 0 | 0.0845225    | 0 | 0           |
| cov2_3_5_11  | 23.0043 | -641.182 | 0.6464284 | 0 | 0            | 0 | 0.17657493  |
| cov1_2_3_6   | 23.1886 | -641.274 | 0.6496153 | 0 | -0.060209449 | 0 | 0.117226    |
| cov2_3_6_11  | 23.212  | -641.286 | 0.6522101 | 0 | 0            | 0 | 0.10525279  |
| cov3_5_7_11  | 23.2295 | -641.295 | 0.6548092 | 0 | 0            | 0 | 0           |
| cov1_3_5_6   | 23.2711 | -641.316 | 0.6567174 | 0 | 0.14723879   | 0 | 0           |
| cov5_6_9_11  | 23.294  | -641.327 | 0.6594117 | 0 | 0            | 0 | 0           |
| cov5_6_10_11 | 23.2993 | -641.33  | 0.6602076 | 0 | 0            | 0 | 0           |
| cov2_3_4_6   | 23.3097 | -641.335 | 0.6509444 | 0 | 0            | 0 | 0.10330981  |
| cov1_6_9_11  | 23.3449 | -641.352 | 0.6601131 | 0 | 0.029208859  | 0 | 0           |
| cov1_6_10_11 | 23.3552 | -641.358 | 0.660857  | 0 | 0.029888329  | 0 | 0           |
| cov3_5_8_11  | 23.358  | -641.359 | 0.6545663 | 0 | 0            | 0 | 0           |
| cov5_7_8_11  | 23.361  | -641.36  | 0.6521125 | 0 | 0            | 0 | 0           |
| cov6_9_10_11 | 23.3659 | -641.363 | 0.6599066 | 0 | 0            | 0 | 0           |
| cov5_6_9_10  | 23.3711 | -641.366 | 0.6589471 | 0 | 0            | 0 | 0           |
| cov3_5_7_8   | 23.3802 | -641.37  | 0.6565635 | 0 | 0            | 0 | 0           |
| cov1_5_6_9   | 23.3811 | -641.371 | 0.6582435 | 0 | -0.017501115 | 0 | 0           |
| cov1_5_6_10  | 23.385  | -641.372 | 0.6590473 | 0 | -0.018192252 | 0 | 0           |
| cov3_7_8_11  | 23.3906 | -641.375 | 0.652695  | 0 | 0            | 0 | 0           |
| cov1_6_9_10  | 23.4181 | -641.389 | 0.659007  | 0 | 0.012103285  | 0 | 0           |
| cov1_5_9_11  | 23.4486 | -641.404 | 0.6594923 | 0 | 0.046553445  | 0 | 0           |
| cov1_5_10_11 | 23.457  | -641.408 | 0.6603033 | 0 | 0.046241127  | 0 | 0           |
| cov1_2_3_11  | 23.4735 | -641.417 | 0.6505545 | 0 | 0.022579608  | 0 | 0.12474885  |
| cov1_5_9_10  | 23.4952 | -641.428 | 0.658849  | 0 | 0.026796201  | 0 | 0           |
| cov1_9_10_11 | 23.4978 | -641.429 | 0.6606346 | 0 | 0.080880605  | 0 | 0           |
| cov5_9_10_11 | 23.5001 | -641.43  | 0.6584196 | 0 | 0            | 0 | 0           |
| cov2_3_4_11  | 23.5022 | -641.431 | 0.6492295 | 0 | 0            | 0 | 0.1350511   |
| cov1_2_3_4   | 23.504  | -641.432 | 0.6495864 | 0 | 0.011294763  | 0 | 0.12349209  |
| cov2_4_5_11  | 23.6546 | -641.507 | 0.6485315 | 0 | 0            | 0 | 0.092378905 |
| cov1_3_5_11  | 23.6864 | -641.523 | 0.6568003 | 0 | 0.23525632   | 0 | 0           |
| cov3_5_6_11  | 23.835  | -641.597 | 0.6545279 | 0 | 0            | 0 | 0           |
| cov3_4_5_11  | 23.8515 | -641.606 | 0.6452312 | 0 | 0            | 0 | 0           |
| cov3_4_6_11  | 23.8975 | -641.629 | 0.6539423 | 0 | 0            | 0 | 0           |
| cov1_3_4_6   | 23.9404 | -641.65  | 0.6528754 | 0 | -0.010417303 | 0 | 0           |
| cov2_5_6_11  | 24.0119 | -641.686 | 0.6545465 | 0 | 0            | 0 | 0.11841341  |
| cov2_4_6_11  | 24.0896 | -641.725 | 0.6544999 | 0 | 0            | 0 | 0.070997257 |
| cov1_2_5_6   | 24.1844 | -641.772 | 0.6531792 | 0 | -0.004933752 | 0 | 0.11187145  |
| cov1_2_4_6   | 24.1993 | -641.78  | 0.6512198 | 0 | -0.06784019  | 0 | 0.077330932 |
| cov1_3_6_11  | 24.2387 | -641.799 | 0.6553228 | 0 | 0.03406156   | 0 | 0           |
| cov1_2_6_11  | 24.2508 | -641.805 | 0.6537588 | 0 | -0.03659019  | 0 | 0.11359075  |
| cov1_3_4_11  | 24.2892 | -641.825 | 0.6535853 | 0 | 0.078855395  | 0 | 0           |
| cov1_2_5_11  | 24.3064 | -641.833 | 0.6548993 | 0 | 0.085600985  | 0 | 0.12103341  |
| cov1_2_4_11  | 24.3301 | -641.845 | 0.6528937 | 0 | 0.02171127   | 0 | 0.086431021 |
| cov1_4_6_11  | 24.4124 | -641.886 | 0.6551943 | 0 | -0.009593802 | 0 | 0           |
| cov1_5_6_11  | 25.0419 | -642.201 | 0.6594502 | 0 | 0.09250265   | 0 | 0           |

|                |         |          |           |   |              |   |             |
|----------------|---------|----------|-----------|---|--------------|---|-------------|
| cov4_5_7_8_9   | 26.498  | -639.324 | 0.6536318 | 0 | 0            | 0 | 0           |
| cov4_5_7_8_10  | 26.5102 | -639.33  | 0.6545519 | 0 | 0            | 0 | 0           |
| cov4_5_6_7_9   | 26.5377 | -639.344 | 0.6544491 | 0 | 0            | 0 | 0           |
| cov4_5_6_7_10  | 26.5474 | -639.349 | 0.6552771 | 0 | 0            | 0 | 0           |
| cov2_4_5_7_9   | 26.5532 | -639.352 | 0.6534289 | 0 | 0            | 0 | 0.034723173 |
| cov2_4_5_7_10  | 26.5672 | -639.359 | 0.6542825 | 0 | 0            | 0 | 0.034376582 |
| cov1_4_5_7_9   | 26.5747 | -639.363 | 0.6546387 | 0 | 0.040004645  | 0 | 0           |
| cov1_4_5_7_10  | 26.5868 | -639.369 | 0.6554592 | 0 | 0.040047589  | 0 | 0           |
| cov4_5_7_9_11  | 26.5923 | -639.371 | 0.6530597 | 0 | 0            | 0 | 0           |
| cov4_5_7_10_11 | 26.603  | -639.377 | 0.6539537 | 0 | 0            | 0 | 0           |
| cov4_5_6_8_9   | 26.6103 | -639.38  | 0.6544081 | 0 | 0            | 0 | 0           |
| cov4_5_6_8_10  | 26.6202 | -639.385 | 0.6552283 | 0 | 0            | 0 | 0           |
| cov2_4_5_8_9   | 26.6255 | -639.388 | 0.653391  | 0 | 0            | 0 | 0.034237585 |
| cov4_5_7_9_10  | 26.626  | -639.388 | 0.6539536 | 0 | 0            | 0 | 0           |
| cov2_4_5_8_10  | 26.6395 | -639.395 | 0.6542444 | 0 | 0            | 0 | 0.033891306 |
| cov3_4_5_7_9   | 26.6412 | -639.396 | 0.6535938 | 0 | 0            | 0 | 0           |
| cov1_4_5_8_9   | 26.6437 | -639.397 | 0.6546058 | 0 | 0.04028251   | 0 | 0           |
| cov3_4_5_7_10  | 26.6534 | -639.402 | 0.6544802 | 0 | 0            | 0 | 0           |
| cov1_4_5_8_10  | 26.6558 | -639.403 | 0.6554263 | 0 | 0.040321096  | 0 | 0           |
| cov4_5_8_9_11  | 26.6655 | -639.408 | 0.6530377 | 0 | 0            | 0 | 0           |
| cov4_5_8_10_11 | 26.6762 | -639.413 | 0.6537801 | 0 | 0            | 0 | 0           |
| cov4_5_8_9_10  | 26.6959 | -639.423 | 0.6539174 | 0 | 0            | 0 | 0           |
| cov3_4_5_8_9   | 26.7112 | -639.431 | 0.6534273 | 0 | 0            | 0 | 0           |
| cov3_4_5_8_10  | 26.7229 | -639.437 | 0.6543231 | 0 | 0            | 0 | 0           |
| cov1_2_4_7_9   | 26.7378 | -639.444 | 0.6528354 | 0 | -0.053183903 | 0 | 0.056249647 |
| cov1_2_4_7_10  | 26.7443 | -639.447 | 0.6538051 | 0 | -0.051355542 | 0 | 0.054905529 |
| cov1_4_7_8_10  | 26.7667 | -639.459 | 0.6551549 | 0 | -0.026517639 | 0 | 0           |
| cov1_4_7_8_9   | 26.7685 | -639.46  | 0.6541839 | 0 | -0.027643881 | 0 | 0           |
| cov2_4_7_8_10  | 26.7913 | -639.471 | 0.6565685 | 0 | 0            | 0 | 0.024392195 |
| cov2_4_7_8_9   | 26.7969 | -639.474 | 0.6557646 | 0 | 0            | 0 | 0.024815644 |
| cov1_2_4_8_9   | 26.8154 | -639.483 | 0.6528083 | 0 | -0.05315481  | 0 | 0.055675872 |
| cov4_7_8_9_10  | 26.8183 | -639.484 | 0.656208  | 0 | 0            | 0 | 0           |
| cov1_2_4_8_10  | 26.8218 | -639.486 | 0.6537724 | 0 | -0.051341143 | 0 | 0.054341214 |
| cov4_6_7_8_10  | 26.8323 | -639.491 | 0.6563418 | 0 | 0            | 0 | 0           |
| cov4_7_8_10_11 | 26.8339 | -639.492 | 0.6565798 | 0 | 0            | 0 | 0           |
| cov3_4_7_8_10  | 26.8342 | -639.492 | 0.656682  | 0 | 0            | 0 | 0           |
| cov4_6_7_8_9   | 26.8385 | -639.495 | 0.6554481 | 0 | 0            | 0 | 0           |
| cov4_7_8_9_11  | 26.8405 | -639.496 | 0.6557314 | 0 | 0            | 0 | 0           |
| cov3_4_7_8_9   | 26.8407 | -639.496 | 0.6558818 | 0 | 0            | 0 | 0           |
| cov1_4_6_7_10  | 26.8594 | -639.505 | 0.6550582 | 0 | -0.054249455 | 0 | 0           |
| cov1_4_6_7_9   | 26.8631 | -639.507 | 0.6540989 | 0 | -0.054852507 | 0 | 0           |
| cov1_4_7_9_10  | 26.8854 | -639.518 | 0.6545757 | 0 | -0.027684649 | 0 | 0           |
| cov1_3_4_7_9   | 26.8883 | -639.519 | 0.654439  | 0 | -0.032624416 | 0 | 0           |
| cov1_4_7_10_11 | 26.8883 | -639.519 | 0.6544063 | 0 | -0.036714618 | 0 | 0           |
| cov1_3_4_7_10  | 26.8904 | -639.52  | 0.6553565 | 0 | -0.030993766 | 0 | 0           |
| cov1_4_7_9_11  | 26.8913 | -639.521 | 0.6534523 | 0 | -0.037572258 | 0 | 0           |
| cov2_4_6_7_10  | 26.9036 | -639.527 | 0.6557528 | 0 | 0            | 0 | 0.033429598 |

|                |         |          |           |   |              |   |             |
|----------------|---------|----------|-----------|---|--------------|---|-------------|
| cov2_4_6_7_9   | 26.9052 | -639.528 | 0.6548788 | 0 | 0            | 0 | 0.034464176 |
| cov2_4_7_9_10  | 26.9165 | -639.534 | 0.6561248 | 0 | 0            | 0 | 0.024018411 |
| cov2_4_7_10_11 | 26.9182 | -639.534 | 0.6565417 | 0 | 0            | 0 | 0.029451782 |
| cov2_4_7_9_11  | 26.9216 | -639.536 | 0.6557423 | 0 | 0            | 0 | 0.030247998 |
| cov2_3_4_7_10  | 26.9299 | -639.54  | 0.6562896 | 0 | 0            | 0 | 0.02663153  |
| cov2_3_4_7_9   | 26.9364 | -639.543 | 0.6555194 | 0 | 0            | 0 | 0.02661118  |
| cov1_4_6_8_10  | 26.9367 | -639.544 | 0.6550095 | 0 | -0.05354937  | 0 | 0           |
| cov1_4_6_8_9   | 26.9404 | -639.545 | 0.6540671 | 0 | -0.054132632 | 0 | 0           |
| cov4_6_7_9_10  | 26.9538 | -639.552 | 0.6557802 | 0 | 0            | 0 | 0           |
| cov4_7_9_10_11 | 26.9575 | -639.554 | 0.6561171 | 0 | 0            | 0 | 0           |
| cov3_4_7_9_10  | 26.9576 | -639.554 | 0.6562643 | 0 | 0            | 0 | 0           |
| cov1_4_8_9_10  | 26.9594 | -639.555 | 0.6545384 | 0 | -0.027914731 | 0 | 0           |
| cov1_4_8_10_11 | 26.9648 | -639.558 | 0.6544076 | 0 | -0.03627909  | 0 | 0           |
| cov1_4_8_9_11  | 26.9678 | -639.559 | 0.6534547 | 0 | -0.037136082 | 0 | 0           |
| cov3_4_6_7_10  | 26.968  | -639.559 | 0.6563736 | 0 | 0            | 0 | 0           |
| cov1_3_4_8_9   | 26.971  | -639.561 | 0.6543141 | 0 | -0.031739734 | 0 | 0           |
| cov1_3_4_8_10  | 26.9721 | -639.561 | 0.6552403 | 0 | -0.030110239 | 0 | 0           |
| cov3_4_6_7_9   | 26.9721 | -639.561 | 0.6555218 | 0 | 0            | 0 | 0           |
| cov3_4_7_10_11 | 26.9722 | -639.561 | 0.6566817 | 0 | 0            | 0 | 0           |
| cov4_6_7_10_11 | 26.9722 | -639.561 | 0.6562073 | 0 | 0            | 0 | 0           |
| cov3_4_7_9_11  | 26.9775 | -639.564 | 0.6558956 | 0 | 0            | 0 | 0           |
| cov4_6_7_9_11  | 26.9783 | -639.564 | 0.655313  | 0 | 0            | 0 | 0           |
| cov2_4_6_8_10  | 26.9791 | -639.565 | 0.6557012 | 0 | 0            | 0 | 0.033143416 |
| cov2_4_6_8_9   | 26.9807 | -639.566 | 0.6548172 | 0 | 0            | 0 | 0.034181921 |
| cov2_4_8_10_11 | 26.9936 | -639.572 | 0.6565636 | 0 | 0            | 0 | 0.02921931  |
| cov2_4_8_9_10  | 26.9937 | -639.572 | 0.6560975 | 0 | 0            | 0 | 0.0234615   |
| cov2_4_8_9_11  | 26.997  | -639.574 | 0.6557152 | 0 | 0            | 0 | 0.030021071 |
| cov2_3_4_8_10  | 27.0033 | -639.577 | 0.6561327 | 0 | 0            | 0 | 0.027682033 |
| cov1_3_4_5_9   | 27.0049 | -639.578 | 0.6533068 | 0 | 0.11615227   | 0 | 0           |
| cov1_3_4_5_10  | 27.0078 | -639.579 | 0.6541307 | 0 | 0.11622948   | 0 | 0           |
| cov2_3_4_8_9   | 27.0105 | -639.581 | 0.6553574 | 0 | 0            | 0 | 0.027670958 |
| cov4_6_8_9_10  | 27.028  | -639.589 | 0.6557332 | 0 | 0            | 0 | 0           |
| cov4_8_9_10_11 | 27.0319 | -639.591 | 0.6560922 | 0 | 0            | 0 | 0           |
| cov3_4_8_9_10  | 27.0345 | -639.593 | 0.6561162 | 0 | 0            | 0 | 0           |
| cov3_4_6_8_10  | 27.0454 | -639.598 | 0.6562377 | 0 | 0            | 0 | 0           |
| cov4_6_8_10_11 | 27.0465 | -639.599 | 0.6561669 | 0 | 0            | 0 | 0           |
| cov3_4_8_10_11 | 27.049  | -639.6   | 0.6565352 | 0 | 0            | 0 | 0           |
| cov3_4_6_8_9   | 27.0503 | -639.6   | 0.6553729 | 0 | 0            | 0 | 0           |
| cov4_6_8_9_11  | 27.0524 | -639.602 | 0.6552841 | 0 | 0            | 0 | 0           |
| cov3_4_8_9_11  | 27.055  | -639.603 | 0.6557486 | 0 | 0            | 0 | 0           |
| cov2_3_7_8_9   | 27.1051 | -639.628 | 0.654763  | 0 | 0            | 0 | 0.087075126 |
| cov2_3_7_8_10  | 27.1072 | -639.629 | 0.6554896 | 0 | 0            | 0 | 0.087891129 |
| cov3_4_5_6_10  | 27.1168 | -639.634 | 0.6531951 | 0 | 0            | 0 | 0           |
| cov1_2_7_8_9   | 27.1174 | -639.634 | 0.654131  | 0 | -0.032413435 | 0 | 0.1107586   |
| cov3_4_5_6_9   | 27.1184 | -639.635 | 0.6523031 | 0 | 0            | 0 | 0           |
| cov1_2_7_8_10  | 27.1346 | -639.643 | 0.6549493 | 0 | -0.030644819 | 0 | 0.11016818  |
| cov1_2_3_7_9   | 27.1769 | -639.664 | 0.6530953 | 0 | -0.031573038 | 0 | 0.11190771  |

|                |         |          |           |   |              |   |             |
|----------------|---------|----------|-----------|---|--------------|---|-------------|
| cov1_2_6_7_9   | 27.186  | -639.668 | 0.6538955 | 0 | -0.06613916  | 0 | 0.10801936  |
| cov2_7_8_9_10  | 27.1869 | -639.669 | 0.6561426 | 0 | 0            | 0 | 0.085121489 |
| cov1_2_3_7_10  | 27.1876 | -639.669 | 0.6539334 | 0 | -0.029637608 | 0 | 0.11139001  |
| cov2_5_7_8_9   | 27.1922 | -639.671 | 0.6556369 | 0 | 0            | 0 | 0.089930966 |
| cov2_7_8_9_11  | 27.1942 | -639.672 | 0.655852  | 0 | 0            | 0 | 0.087720802 |
| cov2_6_7_8_9   | 27.1963 | -639.673 | 0.6557551 | 0 | 0            | 0 | 0.086288424 |
| cov1_2_6_7_10  | 27.2003 | -639.675 | 0.6546846 | 0 | -0.065010787 | 0 | 0.10748305  |
| cov2_5_7_8_10  | 27.203  | -639.677 | 0.6563689 | 0 | 0            | 0 | 0.089565167 |
| cov2_7_8_10_11 | 27.2039 | -639.677 | 0.6565392 | 0 | 0            | 0 | 0.088021673 |
| cov2_6_7_8_10  | 27.2054 | -639.678 | 0.6565037 | 0 | 0            | 0 | 0.086079355 |
| cov1_2_5_7_9   | 27.208  | -639.679 | 0.653418  | 0 | -0.061931543 | 0 | 0.10901045  |
| cov2_3_5_7_9   | 27.2188 | -639.685 | 0.6539423 | 0 | 0            | 0 | 0.10173514  |
| cov1_2_5_7_10  | 27.2209 | -639.686 | 0.6542814 | 0 | -0.061330729 | 0 | 0.10836436  |
| cov2_3_5_7_10  | 27.2264 | -639.688 | 0.6547122 | 0 | 0            | 0 | 0.10143349  |
| cov2_3_4_5_9   | 27.2359 | -639.693 | 0.6501132 | 0 | 0            | 0 | 0.064795813 |
| cov2_3_7_9_10  | 27.2365 | -639.694 | 0.6550561 | 0 | 0            | 0 | 0.087195232 |
| cov2_3_4_5_10  | 27.2425 | -639.697 | 0.6510762 | 0 | 0            | 0 | 0.064464583 |
| cov1_2_3_8_9   | 27.2441 | -639.697 | 0.6529873 | 0 | -0.03128109  | 0 | 0.11193467  |
| cov1_2_7_9_11  | 27.245  | -639.698 | 0.653529  | 0 | -0.040171341 | 0 | 0.10976323  |
| cov2_3_7_9_11  | 27.2499 | -639.7   | 0.6547282 | 0 | 0            | 0 | 0.089127994 |
| cov1_2_7_9_10  | 27.2502 | -639.7   | 0.6543409 | 0 | -0.032007478 | 0 | 0.11045702  |
| cov2_3_6_7_9   | 27.2512 | -639.701 | 0.6546268 | 0 | 0            | 0 | 0.088293861 |
| cov2_3_7_10_11 | 27.2529 | -639.702 | 0.6554393 | 0 | 0            | 0 | 0.089457356 |
| cov2_3_6_7_10  | 27.2537 | -639.702 | 0.6553947 | 0 | 0            | 0 | 0.088141382 |
| cov1_2_3_8_10  | 27.2541 | -639.702 | 0.6538197 | 0 | -0.029338559 | 0 | 0.1114124   |
| cov1_2_7_10_11 | 27.2612 | -639.706 | 0.6543402 | 0 | -0.038569122 | 0 | 0.10923351  |
| cov1_2_6_8_9   | 27.2769 | -639.714 | 0.653878  | 0 | -0.064899092 | 0 | 0.10798566  |
| cov2_3_5_8_9   | 27.2807 | -639.716 | 0.6537663 | 0 | 0            | 0 | 0.10286651  |
| cov2_3_5_8_10  | 27.2879 | -639.719 | 0.6545416 | 0 | 0            | 0 | 0.10255574  |
| cov1_2_6_8_10  | 27.2912 | -639.721 | 0.6546653 | 0 | -0.063771995 | 0 | 0.10745087  |
| cov1_2_5_8_9   | 27.2949 | -639.723 | 0.6533972 | 0 | -0.061662104 | 0 | 0.10890619  |
| cov2_3_8_9_10  | 27.3018 | -639.726 | 0.6549253 | 0 | 0            | 0 | 0.087444988 |
| cov1_2_5_8_10  | 27.3077 | -639.729 | 0.6542592 | 0 | -0.061063169 | 0 | 0.10826078  |
| cov2_3_8_9_11  | 27.3153 | -639.733 | 0.6546077 | 0 | 0            | 0 | 0.089691761 |
| cov2_3_6_8_9   | 27.317  | -639.734 | 0.6544897 | 0 | 0            | 0 | 0.08867512  |
| cov2_3_8_10_11 | 27.3177 | -639.734 | 0.655305  | 0 | 0            | 0 | 0.090018745 |
| cov2_3_6_8_10  | 27.3188 | -639.735 | 0.6552562 | 0 | 0            | 0 | 0.088521327 |
| cov2_5_7_9_10  | 27.3237 | -639.737 | 0.6558703 | 0 | 0            | 0 | 0.089324291 |
| cov2_7_9_10_11 | 27.3249 | -639.738 | 0.6560613 | 0 | 0            | 0 | 0.087536621 |
| cov2_6_7_9_10  | 27.3263 | -639.738 | 0.6554884 | 0 | 0            | 0 | 0.086977621 |
| cov2_5_7_9_11  | 27.3317 | -639.741 | 0.6555803 | 0 | 0            | 0 | 0.090549898 |
| cov2_5_6_7_9   | 27.332  | -639.741 | 0.6555755 | 0 | 0            | 0 | 0.089353235 |
| cov1_2_8_9_11  | 27.3338 | -639.742 | 0.65356   | 0 | -0.039313076 | 0 | 0.10972604  |
| cov2_6_7_9_11  | 27.3342 | -639.742 | 0.6557175 | 0 | 0            | 0 | 0.08798453  |
| cov1_2_8_9_10  | 27.3369 | -639.744 | 0.6543203 | 0 | -0.031788057 | 0 | 0.11034878  |
| cov2_5_6_7_10  | 27.3424 | -639.747 | 0.6563165 | 0 | 0            | 0 | 0.088788662 |
| cov2_5_7_10_11 | 27.3424 | -639.747 | 0.6562876 | 0 | 0            | 0 | 0.090073289 |

|                |         |          |           |   |              |   |             |
|----------------|---------|----------|-----------|---|--------------|---|-------------|
| cov2_6_7_10_11 | 27.3438 | -639.747 | 0.6564508 | 0 | 0            | 0 | 0.087703681 |
| cov1_2_8_10_11 | 27.35   | -639.75  | 0.6543566 | 0 | -0.037687071 | 0 | 0.10919949  |
| cov2_5_8_9_10  | 27.4095 | -639.78  | 0.6558331 | 0 | 0            | 0 | 0.089305587 |
| cov2_8_9_10_11 | 27.4099 | -639.78  | 0.6560468 | 0 | 0            | 0 | 0.087984785 |
| cov2_6_8_9_10  | 27.4118 | -639.781 | 0.6555814 | 0 | 0            | 0 | 0.087329454 |
| cov2_5_8_9_11  | 27.417  | -639.784 | 0.6555637 | 0 | 0            | 0 | 0.090751193 |
| cov2_5_6_8_9   | 27.418  | -639.784 | 0.6555373 | 0 | 0            | 0 | 0.089538699 |
| cov2_6_8_9_11  | 27.4192 | -639.785 | 0.6556832 | 0 | 0            | 0 | 0.088469998 |
| cov2_5_8_10_11 | 27.4278 | -639.789 | 0.6562881 | 0 | 0            | 0 | 0.090270693 |
| cov2_5_6_8_10  | 27.4284 | -639.79  | 0.6562655 | 0 | 0            | 0 | 0.088975002 |
| cov2_6_8_10_11 | 27.4289 | -639.79  | 0.656423  | 0 | 0            | 0 | 0.088180881 |
| cov3_4_5_9_11  | 27.4391 | -639.795 | 0.6498694 | 0 | 0            | 0 | 0           |
| cov3_4_5_10_11 | 27.4397 | -639.795 | 0.6508559 | 0 | 0            | 0 | 0           |
| cov3_4_5_9_10  | 27.4749 | -639.813 | 0.6512232 | 0 | 0            | 0 | 0           |
| cov1_2_3_4_10  | 27.7498 | -639.95  | 0.6517407 | 0 | -0.039295185 | 0 | 0.07226026  |
| cov2_3_5_6_10  | 27.7557 | -639.953 | 0.6528897 | 0 | 0            | 0 | 0.11054635  |
| cov2_3_5_6_9   | 27.7579 | -639.954 | 0.6520796 | 0 | 0            | 0 | 0.11121735  |
| cov1_2_3_4_9   | 27.7639 | -639.957 | 0.6506886 | 0 | -0.041287837 | 0 | 0.073598915 |
| cov2_3_4_10_11 | 27.8146 | -639.983 | 0.6539304 | 0 | 0            | 0 | 0.057975644 |
| cov2_3_4_9_11  | 27.8336 | -639.992 | 0.6530379 | 0 | 0            | 0 | 0.058750634 |
| cov1_4_5_6_7   | 27.8398 | -639.995 | 0.6549487 | 0 | 0.093447739  | 0 | 0           |
| cov2_3_4_9_10  | 27.8429 | -639.997 | 0.6532754 | 0 | 0            | 0 | 0.049952567 |
| cov2_3_5_9_10  | 27.8482 | -639.999 | 0.651689  | 0 | 0            | 0 | 0.12205735  |
| cov1_2_3_5_9   | 27.852  | -640.001 | 0.6519076 | 0 | 0.024163526  | 0 | 0.11626096  |
| cov1_2_3_5_10  | 27.8523 | -640.001 | 0.6527728 | 0 | 0.024665108  | 0 | 0.11559388  |
| cov2_3_4_6_10  | 27.8544 | -640.002 | 0.6533411 | 0 | 0            | 0 | 0.053522433 |
| cov1_4_5_7_8   | 27.8666 | -640.009 | 0.6549464 | 0 | 0.15099452   | 0 | 0           |
| cov2_3_5_9_11  | 27.8688 | -640.01  | 0.6511401 | 0 | 0            | 0 | 0.12230434  |
| cov2_3_5_10_11 | 27.8695 | -640.01  | 0.6520005 | 0 | 0            | 0 | 0.12162356  |
| cov2_3_4_6_9   | 27.8772 | -640.014 | 0.6523684 | 0 | 0            | 0 | 0.05451907  |
| cov3_6_7_8_10  | 27.88   | -640.015 | 0.6583212 | 0 | 0            | 0 | 0           |
| cov3_6_7_8_9   | 27.8801 | -640.015 | 0.6575661 | 0 | 0            | 0 | 0           |
| cov1_2_3_6_10  | 27.8853 | -640.018 | 0.6519588 | 0 | -0.061667412 | 0 | 0.10898515  |
| cov2_4_5_6_7   | 27.8881 | -640.019 | 0.6527051 | 0 | 0            | 0 | 0.055951478 |
| cov5_6_7_8_9   | 27.8915 | -640.021 | 0.6582568 | 0 | 0            | 0 | 0           |
| cov5_6_7_8_10  | 27.8924 | -640.021 | 0.6590452 | 0 | 0            | 0 | 0           |
| cov1_2_3_6_9   | 27.8957 | -640.023 | 0.6509993 | 0 | -0.063086035 | 0 | 0.1096514   |
| cov1_4_5_6_8   | 27.9135 | -640.032 | 0.654902  | 0 | 0.094734315  | 0 | 0           |
| cov6_7_8_9_11  | 27.9255 | -640.038 | 0.658032  | 0 | 0            | 0 | 0           |
| cov4_5_6_7_8   | 27.9273 | -640.039 | 0.6540109 | 0 | 0            | 0 | 0           |
| cov6_7_8_10_11 | 27.9306 | -640.041 | 0.6587776 | 0 | 0            | 0 | 0           |
| cov6_7_8_9_10  | 27.9388 | -640.045 | 0.6588738 | 0 | 0            | 0 | 0           |
| cov1_6_7_8_9   | 27.9464 | -640.048 | 0.6586484 | 0 | 0.009784249  | 0 | 0           |
| cov1_3_4_6_10  | 27.9474 | -640.049 | 0.6533966 | 0 | -0.042560511 | 0 | 0           |
| cov1_2_3_9_10  | 27.9513 | -640.051 | 0.6516472 | 0 | -0.025829117 | 0 | 0.11216346  |
| cov1_6_7_8_10  | 27.9522 | -640.051 | 0.6594041 | 0 | 0.010531697  | 0 | 0           |
| cov1_2_4_5_7   | 27.9579 | -640.054 | 0.6539461 | 0 | 0.12309856   | 0 | 0.03188168  |

|                |         |          |           |   |              |   |             |
|----------------|---------|----------|-----------|---|--------------|---|-------------|
| cov5_7_8_9_11  | 27.9683 | -640.059 | 0.6569475 | 0 | 0            | 0 | 0           |
| cov5_7_8_10_11 | 27.9692 | -640.06  | 0.6577946 | 0 | 0            | 0 | 0           |
| cov2_4_5_6_8   | 27.9707 | -640.061 | 0.6526397 | 0 | 0            | 0 | 0.05572323  |
| cov1_2_3_10_11 | 27.9712 | -640.061 | 0.652274  | 0 | -0.021978394 | 0 | 0.11224064  |
| cov1_3_4_6_9   | 27.9738 | -640.062 | 0.6523674 | 0 | -0.043405217 | 0 | 0           |
| cov1_2_3_9_11  | 27.9782 | -640.064 | 0.6513352 | 0 | -0.023617304 | 0 | 0.11293312  |
| cov2_3_9_10_11 | 27.9799 | -640.065 | 0.6531312 | 0 | 0            | 0 | 0.099429399 |
| cov2_3_6_10_11 | 27.9858 | -640.068 | 0.6540138 | 0 | 0            | 0 | 0.093387262 |
| cov1_4_5_7_11  | 27.9921 | -640.071 | 0.6543933 | 0 | 0.14311227   | 0 | 0           |
| cov1_3_4_9_10  | 27.9931 | -640.072 | 0.6529656 | 0 | -0.011688036 | 0 | 0           |
| cov1_3_4_5_7   | 27.9933 | -640.072 | 0.6546843 | 0 | 0.16089187   | 0 | 0           |
| cov3_4_6_10_11 | 27.9945 | -640.073 | 0.6547171 | 0 | 0            | 0 | 0           |
| cov5_7_8_9_10  | 27.9954 | -640.073 | 0.6578279 | 0 | 0            | 0 | 0           |
| cov3_4_9_10_11 | 27.9963 | -640.073 | 0.6536508 | 0 | 0            | 0 | 0           |
| cov3_4_6_9_10  | 27.9988 | -640.075 | 0.653789  | 0 | 0            | 0 | 0           |
| cov2_3_6_9_11  | 27.9992 | -640.075 | 0.6531482 | 0 | 0            | 0 | 0.093787277 |
| cov2_3_6_9_10  | 28.0002 | -640.075 | 0.6530552 | 0 | 0            | 0 | 0.089338306 |
| cov1_5_7_8_9   | 28.0008 | -640.076 | 0.6579553 | 0 | 0.019499102  | 0 | 0           |
| cov1_5_7_8_10  | 28.0032 | -640.077 | 0.6587852 | 0 | 0.019232173  | 0 | 0           |
| cov3_6_7_10_11 | 28.0102 | -640.08  | 0.6576456 | 0 | 0            | 0 | 0           |
| cov3_6_7_9_11  | 28.0115 | -640.081 | 0.6569097 | 0 | 0            | 0 | 0           |
| cov3_5_6_7_10  | 28.0121 | -640.081 | 0.658314  | 0 | 0            | 0 | 0           |
| cov1_3_4_10_11 | 28.0129 | -640.082 | 0.6537355 | 0 | -0.007432121 | 0 | 0           |
| cov3_5_6_7_9   | 28.0143 | -640.082 | 0.6575434 | 0 | 0            | 0 | 0           |
| cov3_5_7_8_9   | 28.0161 | -640.083 | 0.6572451 | 0 | 0            | 0 | 0           |
| cov1_3_7_8_9   | 28.0165 | -640.084 | 0.6579579 | 0 | 0.060992887  | 0 | 0           |
| cov3_5_7_8_10  | 28.0175 | -640.084 | 0.6580932 | 0 | 0            | 0 | 0           |
| cov1_3_7_8_10  | 28.0188 | -640.085 | 0.6587437 | 0 | 0.062470322  | 0 | 0           |
| cov3_4_6_9_11  | 28.0212 | -640.086 | 0.6537459 | 0 | 0            | 0 | 0           |
| cov5_6_7_9_10  | 28.0237 | -640.087 | 0.6585216 | 0 | 0            | 0 | 0           |
| cov3_6_7_9_10  | 28.025  | -640.088 | 0.657851  | 0 | 0            | 0 | 0           |
| cov1_5_6_7_10  | 28.027  | -640.089 | 0.6584874 | 0 | -0.023717487 | 0 | 0           |
| cov1_5_6_7_9   | 28.0271 | -640.089 | 0.6576862 | 0 | -0.022952781 | 0 | 0           |
| cov1_2_4_5_8   | 28.0287 | -640.09  | 0.6539351 | 0 | 0.12419764   | 0 | 0.030884689 |
| cov5_6_7_9_11  | 28.0288 | -640.09  | 0.6578114 | 0 | 0            | 0 | 0           |
| cov5_6_7_10_11 | 28.0292 | -640.09  | 0.6585374 | 0 | 0            | 0 | 0           |
| cov1_3_6_7_10  | 28.0335 | -640.092 | 0.6583951 | 0 | 0.013916593  | 0 | 0           |
| cov1_3_6_7_9   | 28.0341 | -640.092 | 0.6576366 | 0 | 0.013075987  | 0 | 0           |
| cov1_3_4_9_11  | 28.0366 | -640.094 | 0.6525826 | 0 | -0.008633386 | 0 | 0           |
| cov4_5_6_7_11  | 28.0423 | -640.096 | 0.6530745 | 0 | 0            | 0 | 0           |
| cov1_7_8_9_11  | 28.0497 | -640.1   | 0.6581175 | 0 | 0.045421108  | 0 | 0           |
| cov1_3_4_5_8   | 28.0531 | -640.102 | 0.6545852 | 0 | 0.16508655   | 0 | 0           |
| cov1_7_8_10_11 | 28.0575 | -640.104 | 0.6588896 | 0 | 0.046552228  | 0 | 0           |
| cov1_4_5_8_11  | 28.0618 | -640.106 | 0.654386  | 0 | 0.14401347   | 0 | 0           |
| cov6_7_9_10_11 | 28.0649 | -640.108 | 0.6582176 | 0 | 0            | 0 | 0           |
| cov3_4_5_6_7   | 28.0714 | -640.111 | 0.6541511 | 0 | 0            | 0 | 0           |
| cov1_7_8_9_10  | 28.0715 | -640.111 | 0.659255  | 0 | 0.059576373  | 0 | 0           |

|                |         |          |           |   |              |   |   |
|----------------|---------|----------|-----------|---|--------------|---|---|
| cov1_6_7_9_11  | 28.077  | -640.114 | 0.6579345 | 0 | 0.002910942  | 0 | 0 |
| cov1_6_7_10_11 | 28.082  | -640.116 | 0.6586802 | 0 | 0.003501277  | 0 | 0 |
| cov3_6_8_10_11 | 28.084  | -640.117 | 0.6575106 | 0 | 0            | 0 | 0 |
| cov3_6_8_9_11  | 28.0861 | -640.118 | 0.6567757 | 0 | 0            | 0 | 0 |
| cov1_6_7_9_10  | 28.087  | -640.119 | 0.6589374 | 0 | 0.012259589  | 0 | 0 |
| cov5_7_9_10_11 | 28.0877 | -640.119 | 0.6573008 | 0 | 0            | 0 | 0 |
| cov3_5_6_8_10  | 28.0878 | -640.119 | 0.6581568 | 0 | 0            | 0 | 0 |
| cov3_5_6_8_9   | 28.0907 | -640.121 | 0.6573758 | 0 | 0            | 0 | 0 |
| cov3_6_8_9_10  | 28.0972 | -640.124 | 0.6577046 | 0 | 0            | 0 | 0 |
| cov3_5_7_10_11 | 28.1016 | -640.126 | 0.6572648 | 0 | 0            | 0 | 0 |
| cov3_5_7_9_11  | 28.1023 | -640.126 | 0.6564541 | 0 | 0            | 0 | 0 |
| cov1_3_6_8_10  | 28.1042 | -640.127 | 0.6582621 | 0 | 0.014994981  | 0 | 0 |
| cov1_3_6_8_9   | 28.1057 | -640.128 | 0.657497  | 0 | 0.014158653  | 0 | 0 |
| cov1_5_7_9_11  | 28.1069 | -640.129 | 0.6570875 | 0 | 0.005537966  | 0 | 0 |
| cov1_5_7_10_11 | 28.1078 | -640.129 | 0.6580284 | 0 | 0.005048467  | 0 | 0 |
| cov5_6_8_9_10  | 28.1125 | -640.132 | 0.6584753 | 0 | 0            | 0 | 0 |
| cov1_5_6_8_10  | 28.1173 | -640.134 | 0.6584627 | 0 | -0.022514439 | 0 | 0 |
| cov1_5_6_8_9   | 28.1174 | -640.134 | 0.6576624 | 0 | -0.021751264 | 0 | 0 |
| cov5_6_8_9_11  | 28.1191 | -640.135 | 0.6577695 | 0 | 0            | 0 | 0 |
| cov5_6_8_10_11 | 28.1196 | -640.135 | 0.6585505 | 0 | 0            | 0 | 0 |
| cov1_5_7_9_10  | 28.1221 | -640.136 | 0.6582845 | 0 | 0.018011873  | 0 | 0 |
| cov4_5_6_8_11  | 28.126  | -640.138 | 0.6530418 | 0 | 0            | 0 | 0 |
| cov1_3_7_9_11  | 28.1268 | -640.139 | 0.6570567 | 0 | 0.046626378  | 0 | 0 |
| cov1_3_7_10_11 | 28.1279 | -640.139 | 0.6578248 | 0 | 0.04781943   | 0 | 0 |
| cov1_3_5_7_9   | 28.1307 | -640.141 | 0.6576207 | 0 | 0.0299953    | 0 | 0 |
| cov1_3_5_7_10  | 28.1312 | -640.141 | 0.6584319 | 0 | 0.030514488  | 0 | 0 |
| cov3_5_7_9_10  | 28.1351 | -640.143 | 0.6576173 | 0 | 0            | 0 | 0 |
| cov1_3_7_9_10  | 28.1458 | -640.148 | 0.6582673 | 0 | 0.061332394  | 0 | 0 |
| cov6_8_9_10_11 | 28.1583 | -640.154 | 0.6582106 | 0 | 0            | 0 | 0 |
| cov3_4_5_6_8   | 28.1598 | -640.155 | 0.6540032 | 0 | 0            | 0 | 0 |
| cov1_6_8_9_11  | 28.1699 | -640.16  | 0.657948  | 0 | 0.004701276  | 0 | 0 |
| cov1_6_8_10_11 | 28.175  | -640.163 | 0.658694  | 0 | 0.005292422  | 0 | 0 |
| cov5_8_9_10_11 | 28.1764 | -640.164 | 0.6572822 | 0 | 0            | 0 | 0 |
| cov1_6_8_9_10  | 28.1772 | -640.164 | 0.6588939 | 0 | 0.013538137  | 0 | 0 |
| cov1_7_9_10_11 | 28.1773 | -640.164 | 0.6583623 | 0 | 0.045464988  | 0 | 0 |
| cov3_5_8_10_11 | 28.184  | -640.167 | 0.6570892 | 0 | 0            | 0 | 0 |
| cov3_5_8_9_11  | 28.1853 | -640.168 | 0.6562726 | 0 | 0            | 0 | 0 |
| cov3_7_8_9_11  | 28.1917 | -640.171 | 0.6546834 | 0 | 0            | 0 | 0 |
| cov1_5_8_9_11  | 28.1953 | -640.173 | 0.6570636 | 0 | 0.006435598  | 0 | 0 |
| cov1_5_8_10_11 | 28.1963 | -640.173 | 0.65791   | 0 | 0.005843469  | 0 | 0 |
| cov1_3_8_9_11  | 28.1976 | -640.174 | 0.6569517 | 0 | 0.047574833  | 0 | 0 |
| cov1_3_8_10_11 | 28.1979 | -640.174 | 0.6577243 | 0 | 0.048766179  | 0 | 0 |
| cov3_7_8_10_11 | 28.2045 | -640.178 | 0.6554258 | 0 | 0            | 0 | 0 |
| cov1_3_5_8_10  | 28.2059 | -640.178 | 0.6583217 | 0 | 0.034759603  | 0 | 0 |
| cov1_3_5_8_9   | 28.206  | -640.178 | 0.6575264 | 0 | 0.034215617  | 0 | 0 |
| cov1_5_8_9_10  | 28.2072 | -640.179 | 0.6582202 | 0 | 0.018134157  | 0 | 0 |
| cov1_3_8_9_10  | 28.2127 | -640.182 | 0.6581378 | 0 | 0.061655347  | 0 | 0 |

|                |         |          |           |   |              |   |              |
|----------------|---------|----------|-----------|---|--------------|---|--------------|
| cov3_5_8_9_10  | 28.2177 | -640.184 | 0.6574438 | 0 | 0            | 0 | 0            |
| cov7_8_9_10_11 | 28.2377 | -640.194 | 0.6560174 | 0 | 0            | 0 | 0            |
| cov4_5_6_9_11  | 28.2481 | -640.199 | 0.6552056 | 0 | 0            | 0 | 0            |
| cov1_4_5_9_11  | 28.2563 | -640.203 | 0.6558963 | 0 | 0.069188132  | 0 | 0            |
| cov4_5_6_10_11 | 28.264  | -640.207 | 0.6560466 | 0 | 0            | 0 | 0            |
| cov1_8_9_10_11 | 28.2655 | -640.208 | 0.6583801 | 0 | 0.046305093  | 0 | 0            |
| cov1_4_5_10_11 | 28.2755 | -640.213 | 0.6567028 | 0 | 0.069313638  | 0 | 0            |
| cov1_4_5_6_9   | 28.2802 | -640.215 | 0.6548631 | 0 | 0.026530377  | 0 | 0            |
| cov4_5_6_9_10  | 28.2862 | -640.218 | 0.6548329 | 0 | 0            | 0 | 0            |
| cov2_4_5_7_8   | 28.2944 | -640.222 | 0.6499746 | 0 | 0            | 0 | 0.10762558   |
| cov1_4_5_6_10  | 28.2962 | -640.223 | 0.6556657 | 0 | 0.026087701  | 0 | 0            |
| cov2_4_5_6_9   | 28.2964 | -640.224 | 0.6545677 | 0 | 0            | 0 | -0.004601991 |
| cov1_2_4_5_9   | 28.3044 | -640.228 | 0.6553482 | 0 | 0.066258582  | 0 | -0.017606362 |
| cov1_4_5_9_10  | 28.3083 | -640.229 | 0.6551596 | 0 | 0.050398808  | 0 | 0            |
| cov2_4_5_6_10  | 28.3113 | -640.231 | 0.6554144 | 0 | 0            | 0 | -0.005298712 |
| cov2_4_5_7_11  | 28.3197 | -640.235 | 0.6491226 | 0 | 0            | 0 | 0.092297566  |
| cov3_7_9_10_11 | 28.3212 | -640.236 | 0.6549451 | 0 | 0            | 0 | 0            |
| cov1_2_4_5_10  | 28.3213 | -640.236 | 0.6561758 | 0 | 0.067042146  | 0 | -0.018291313 |
| cov1_3_4_5_6   | 28.3516 | -640.251 | 0.6537252 | 0 | 0.16889726   | 0 | 0            |
| cov2_3_4_5_7   | 28.3742 | -640.262 | 0.6508903 | 0 | 0            | 0 | 0.092841067  |
| cov2_5_6_7_8   | 28.3876 | -640.269 | 0.6537826 | 0 | 0            | 0 | 0.11205662   |
| cov2_4_5_9_11  | 28.3981 | -640.274 | 0.653757  | 0 | 0            | 0 | 0.019137651  |
| cov3_8_9_10_11 | 28.4002 | -640.275 | 0.6547873 | 0 | 0            | 0 | 0            |
| cov2_4_5_9_10  | 28.4024 | -640.277 | 0.6538415 | 0 | 0            | 0 | 0.012612034  |
| cov2_4_5_8_11  | 28.4029 | -640.277 | 0.6490752 | 0 | 0            | 0 | 0.09222871   |
| cov4_5_9_10_11 | 28.4072 | -640.279 | 0.6537012 | 0 | 0            | 0 | 0            |
| cov2_4_5_10_11 | 28.4189 | -640.285 | 0.6546246 | 0 | 0            | 0 | 0.018567869  |
| cov2_3_4_5_8   | 28.4666 | -640.309 | 0.6506939 | 0 | 0            | 0 | 0.094513716  |
| cov2_3_5_6_7   | 28.4959 | -640.323 | 0.6529638 | 0 | 0            | 0 | 0.11780728   |
| cov1_2_5_6_7   | 28.5223 | -640.336 | 0.6531674 | 0 | -0.020087687 | 0 | 0.11694667   |
| cov1_2_3_4_5   | 28.5233 | -640.337 | 0.6528394 | 0 | 0.21155619   | 0 | 0.025808876  |
| cov2_5_6_7_11  | 28.5318 | -640.341 | 0.6535995 | 0 | 0            | 0 | 0.11225051   |
| cov1_2_6_7_8   | 28.5441 | -640.347 | 0.6522725 | 0 | -0.066507578 | 0 | 0.11536142   |
| cov1_3_4_5_11  | 28.552  | -640.351 | 0.6536387 | 0 | 0.23214684   | 0 | 0            |
| cov2_3_5_6_8   | 28.5746 | -640.363 | 0.6527845 | 0 | 0            | 0 | 0.1189955    |
| cov1_2_5_7_8   | 28.6074 | -640.379 | 0.6533359 | 0 | 0.041327506  | 0 | 0.12222      |
| cov1_2_5_6_8   | 28.6169 | -640.384 | 0.6531329 | 0 | -0.01870886  | 0 | 0.11692865   |
| cov2_5_6_8_11  | 28.6254 | -640.388 | 0.6535574 | 0 | 0            | 0 | 0.11265758   |
| cov1_2_4_6_7   | 28.6324 | -640.391 | 0.6518857 | 0 | -0.068284223 | 0 | 0.099368281  |
| cov2_3_4_7_8   | 28.6402 | -640.395 | 0.6535806 | 0 | 0            | 0 | 0.079539588  |
| cov2_5_7_8_11  | 28.6431 | -640.397 | 0.6512943 | 0 | 0            | 0 | 0.13374737   |
| cov2_4_6_7_8   | 28.6568 | -640.404 | 0.6537113 | 0 | 0            | 0 | 0.079878217  |
| cov1_2_3_6_7   | 28.671  | -640.411 | 0.6525633 | 0 | -0.06463787  | 0 | 0.11478736   |
| cov2_3_5_7_8   | 28.6786 | -640.415 | 0.6517366 | 0 | 0            | 0 | 0.13932912   |
| cov2_3_6_7_8   | 28.6818 | -640.416 | 0.6542508 | 0 | 0            | 0 | 0.093545033  |
| cov1_2_6_7_11  | 28.6868 | -640.419 | 0.6520007 | 0 | -0.066794418 | 0 | 0.11528567   |
| cov2_6_7_8_11  | 28.6886 | -640.42  | 0.6541613 | 0 | 0            | 0 | 0.096286348  |



|                |         |          |           |   |              |             |
|----------------|---------|----------|-----------|---|--------------|-------------|
| cov3_4_5_7_11  | 28.7108 | -640.431 | 0.6509716 | 0 | 0            | 0           |
| cov1_2_3_5_7   | 28.7208 | -640.436 | 0.653005  | 0 | 0.054286283  | 0.12366365  |
| cov2_3_4_6_7   | 28.7214 | -640.436 | 0.6543788 | 0 | 0            | 0.067495756 |
| cov1_2_4_6_8   | 28.7246 | -640.438 | 0.6518423 | 0 | -0.067155631 | 0.098946313 |
| cov1_2_4_7_8   | 28.7276 | -640.439 | 0.6519601 | 0 | -0.007984386 | 0.10404778  |
| cov1_2_5_7_11  | 28.7304 | -640.44  | 0.6528196 | 0 | 0.034808623  | 0.12146516  |
| cov2_4_7_8_11  | 28.7311 | -640.441 | 0.6523643 | 0 | 0            | 0.096529138 |
| cov1_3_5_6_10  | 28.7353 | -640.443 | 0.6569413 | 0 | 0.056456328  | 0           |
| cov1_2_3_4_7   | 28.7442 | -640.447 | 0.6527434 | 0 | -0.015824075 | 0.088229254 |
| cov1_3_5_6_9   | 28.749  | -640.45  | 0.6561439 | 0 | 0.057221721  | 0           |
| cov2_3_4_7_11  | 28.7625 | -640.457 | 0.6535437 | 0 | 0            | 0.078535758 |
| cov2_3_7_8_11  | 28.7633 | -640.457 | 0.6529579 | 0 | 0            | 0.1132113   |
| cov1_2_3_7_8   | 28.7641 | -640.457 | 0.6527458 | 0 | -0.004762459 | 0.12001631  |
| cov2_3_4_5_6   | 28.7703 | -640.46  | 0.6503035 | 0 | 0            | 0.076560757 |
| cov2_3_5_7_11  | 28.7729 | -640.462 | 0.6511485 | 0 | 0            | 0.13403157  |
| cov1_2_3_6_8   | 28.7738 | -640.462 | 0.6524195 | 0 | -0.06321186  | 0.11496418  |
| cov1_2_7_8_11  | 28.7813 | -640.466 | 0.6518661 | 0 | -0.009123799 | 0.12028012  |
| cov1_2_6_8_11  | 28.7828 | -640.467 | 0.6519884 | 0 | -0.064956907 | 0.11531141  |
| cov2_4_6_7_11  | 28.7839 | -640.467 | 0.6539044 | 0 | 0            | 0.082293817 |
| cov3_5_6_9_10  | 28.7948 | -640.473 | 0.6558084 | 0 | 0            | 0           |
| cov1_2_3_5_8   | 28.7962 | -640.473 | 0.6529063 | 0 | 0.058352409  | 0.12398626  |
| cov1_3_6_9_10  | 28.7976 | -640.474 | 0.6559285 | 0 | 0.01664051   | 0           |
| cov3_5_6_10_11 | 28.8042 | -640.477 | 0.6558566 | 0 | 0            | 0           |
| cov1_2_4_9_11  | 28.8058 | -640.478 | 0.6544077 | 0 | -0.035604114 | 0.034289096 |
| cov2_3_6_7_11  | 28.8081 | -640.479 | 0.6543866 | 0 | 0            | 0.096147621 |
| cov3_6_9_10_11 | 28.8088 | -640.48  | 0.6555921 | 0 | 0            | 0           |
| cov3_7_8_9_10  | 28.8096 | -640.48  | 0.6553028 | 0 | 0            | 0           |
| cov1_4_6_10_11 | 28.8105 | -640.481 | 0.6561266 | 0 | -0.049520861 | 0           |
| cov1_2_4_10_11 | 28.8119 | -640.481 | 0.6554048 | 0 | -0.033884859 | 0.03274771  |
| cov1_4_6_9_11  | 28.8123 | -640.481 | 0.6551604 | 0 | -0.050002618 | 0           |
| cov1_3_6_10_11 | 28.8127 | -640.482 | 0.6562894 | 0 | 0.017396946  | 0           |
| cov1_2_5_8_11  | 28.8192 | -640.485 | 0.6528257 | 0 | 0.035698631  | 0.12143966  |
| cov3_5_6_9_11  | 28.8206 | -640.486 | 0.6550123 | 0 | 0            | 0           |
| cov3_4_5_8_11  | 28.8213 | -640.486 | 0.6507632 | 0 | 0            | 0           |
| cov2_3_4_6_8   | 28.8239 | -640.487 | 0.654199  | 0 | 0            | 0.068963124 |
| cov1_3_6_9_11  | 28.8334 | -640.492 | 0.6554207 | 0 | 0.016822946  | 0           |
| cov3_4_5_7_8   | 28.8342 | -640.492 | 0.6527413 | 0 | 0            | 0           |
| cov1_4_9_10_11 | 28.8417 | -640.496 | 0.6555304 | 0 | -0.021732129 | 0           |
| cov1_2_4_6_9   | 28.8418 | -640.496 | 0.6532183 | 0 | -0.079834312 | 0.029815059 |
| cov1_2_4_6_10  | 28.8434 | -640.497 | 0.6542233 | 0 | -0.078514459 | 0.028303922 |
| cov4_5_7_8_11  | 28.8464 | -640.499 | 0.6483511 | 0 | 0            | 0           |
| cov1_2_4_7_11  | 28.8486 | -640.5   | 0.6514636 | 0 | -0.014006981 | 0.10328007  |
| cov1_2_3_4_8   | 28.8492 | -640.5   | 0.6526025 | 0 | -0.014959454 | 0.089232054 |
| cov2_4_9_10_11 | 28.8492 | -640.5   | 0.6567384 | 0 | 0            | 0.018740866 |
| cov3_4_6_7_8   | 28.8546 | -640.503 | 0.6561514 | 0 | 0            | 0           |
| cov1_2_4_9_10  | 28.8591 | -640.505 | 0.6537404 | 0 | -0.053779652 | 0.029389034 |
| cov1_4_6_9_10  | 28.8616 | -640.506 | 0.6544408 | 0 | -0.066772403 | 0           |

|                |         |          |           |   |              |   |              |
|----------------|---------|----------|-----------|---|--------------|---|--------------|
| cov2_3_5_8_11  | 28.8621 | -640.506 | 0.6509483 | 0 | 0            | 0 | 0.13549981   |
| cov2_3_4_8_11  | 28.8655 | -640.508 | 0.6533627 | 0 | 0            | 0 | 0.080226052  |
| cov4_6_9_10_11 | 28.8696 | -640.51  | 0.656938  | 0 | 0            | 0 | 0            |
| cov2_4_6_8_11  | 28.8698 | -640.51  | 0.653797  | 0 | 0            | 0 | 0.082308791  |
| cov2_4_6_10_11 | 28.8738 | -640.512 | 0.6572314 | 0 | 0            | 0 | 0.01828856   |
| cov2_4_6_9_11  | 28.8741 | -640.512 | 0.6563085 | 0 | 0            | 0 | 0.019564103  |
| cov1_3_5_9_10  | 28.8773 | -640.514 | 0.6567448 | 0 | 0.10466124   | 0 | 0            |
| cov1_2_3_7_11  | 28.8826 | -640.517 | 0.6522753 | 0 | -0.010936153 | 0 | 0.11914571   |
| cov1_3_5_10_11 | 28.8912 | -640.521 | 0.6568383 | 0 | 0.10248426   | 0 | 0            |
| cov1_3_5_9_11  | 28.903  | -640.527 | 0.6561521 | 0 | 0.10303565   | 0 | 0            |
| cov2_3_6_8_11  | 28.9039 | -640.527 | 0.6542588 | 0 | 0            | 0 | 0.096866086  |
| cov1_3_4_6_7   | 28.9274 | -640.539 | 0.6554637 | 0 | -0.037958152 | 0 | 0            |
| cov1_2_4_8_11  | 28.9349 | -640.543 | 0.6514395 | 0 | -0.013288661 | 0 | 0.10285948   |
| cov1_3_9_10_11 | 28.9396 | -640.545 | 0.6559631 | 0 | 0.064607225  | 0 | 0            |
| cov1_2_3_8_11  | 28.9809 | -640.566 | 0.6521838 | 0 | -0.009764412 | 0 | 0.11931932   |
| cov3_4_6_7_11  | 28.9815 | -640.566 | 0.6561014 | 0 | 0            | 0 | 0            |
| cov1_3_4_7_8   | 29.0283 | -640.589 | 0.6555713 | 0 | 0.022342195  | 0 | 0            |
| cov3_4_7_8_11  | 29.0284 | -640.59  | 0.6543025 | 0 | 0            | 0 | 0            |
| cov2_4_6_9_10  | 29.0303 | -640.59  | 0.6554694 | 0 | 0            | 0 | 0.007293181  |
| cov1_3_4_6_8   | 29.0479 | -640.599 | 0.6553322 | 0 | -0.03565342  | 0 | 0            |
| cov1_4_6_7_8   | 29.0568 | -640.604 | 0.6547176 | 0 | -0.02378409  | 0 | 0            |
| cov4_6_7_8_11  | 29.0787 | -640.615 | 0.655055  | 0 | 0            | 0 | 0            |
| cov3_4_5_6_11  | 29.0911 | -640.621 | 0.651607  | 0 | 0            | 0 | 0            |
| cov3_4_6_8_11  | 29.0957 | -640.623 | 0.6559513 | 0 | 0            | 0 | 0            |
| cov1_3_4_7_11  | 29.1314 | -640.641 | 0.6549537 | 0 | 0.013470079  | 0 | 0            |
| cov1_4_6_7_11  | 29.1955 | -640.673 | 0.6542312 | 0 | -0.026470824 | 0 | 0            |
| cov3_5_9_10_11 | 29.2104 | -640.68  | 0.6534091 | 0 | 0            | 0 | 0            |
| cov1_3_4_8_11  | 29.2475 | -640.699 | 0.6548695 | 0 | 0.015426328  | 0 | 0            |
| cov1_2_3_5_6   | 29.2762 | -640.713 | 0.6517207 | 0 | 0.065037765  | 0 | 0.12428834   |
| cov1_4_6_8_11  | 29.2841 | -640.717 | 0.6542166 | 0 | -0.025005285 | 0 | 0            |
| cov1_4_7_8_11  | 29.3375 | -640.744 | 0.6539887 | 0 | 0.038819977  | 0 | 0            |
| cov2_3_5_6_11  | 29.3734 | -640.762 | 0.6505748 | 0 | 0            | 0 | 0.13768135   |
| cov1_5_6_7_8   | 29.4461 | -640.798 | 0.658327  | 0 | 0.059470051  | 0 | 0            |
| cov5_6_7_8_11  | 29.508  | -640.829 | 0.6567868 | 0 | 0            | 0 | 0            |
| cov3_5_6_7_8   | 29.5428 | -640.847 | 0.657634  | 0 | 0            | 0 | 0            |
| cov3_6_7_8_11  | 29.5538 | -640.852 | 0.6571896 | 0 | 0            | 0 | 0            |
| cov1_2_3_5_11  | 29.5591 | -640.855 | 0.6520007 | 0 | 0.13728256   | 0 | 0.13051599   |
| cov1_3_6_7_8   | 29.5602 | -640.855 | 0.6578334 | 0 | 0.016397449  | 0 | 0            |
| cov1_6_7_8_11  | 29.5795 | -640.865 | 0.6568425 | 0 | 0.011015968  | 0 | 0            |
| cov1_5_6_7_11  | 29.5836 | -640.867 | 0.6577462 | 0 | 0.054746228  | 0 | 0            |
| cov1_4_5_6_11  | 29.5895 | -640.87  | 0.6560088 | 0 | 0.12738328   | 0 | 0            |
| cov1_3_5_6_7   | 29.591  | -640.871 | 0.6580975 | 0 | 0.068301394  | 0 | 0            |
| cov3_5_6_7_11  | 29.6582 | -640.904 | 0.6568223 | 0 | 0            | 0 | 0            |
| cov1_3_5_6_8   | 29.6775 | -640.914 | 0.6579836 | 0 | 0.073672864  | 0 | 0            |
| cov1_5_6_8_11  | 29.6798 | -640.915 | 0.6577463 | 0 | 0.056677247  | 0 | 0            |
| cov1_2_4_5_6   | 29.6819 | -640.916 | 0.6550669 | 0 | 0.12163757   | 0 | -0.014384769 |
| cov1_3_6_7_11  | 29.6928 | -640.922 | 0.6573076 | 0 | 0.011921187  | 0 | 0            |

|                  |         |          |           |   |              |   |              |
|------------------|---------|----------|-----------|---|--------------|---|--------------|
| cov1_2_6_9_11    | 29.6942 | -640.922 | 0.6560182 | 0 | -0.042626799 | 0 | 0.10513494   |
| cov1_2_6_10_11   | 29.7132 | -640.932 | 0.6568181 | 0 | -0.04154413  | 0 | 0.10455886   |
| cov2_6_9_10_11   | 29.7422 | -640.946 | 0.6575378 | 0 | 0            | 0 | 0.09316385   |
| cov2_5_6_9_11    | 29.7513 | -640.951 | 0.65725   | 0 | 0            | 0 | 0.093316639  |
| cov3_5_6_8_11    | 29.7632 | -640.957 | 0.6566558 | 0 | 0            | 0 | 0            |
| cov1_5_7_8_11    | 29.7637 | -640.957 | 0.6577962 | 0 | 0.12923295   | 0 | 0            |
| cov2_5_6_10_11   | 29.7673 | -640.959 | 0.6579328 | 0 | 0            | 0 | 0.092696944  |
| cov1_2_5_9_11    | 29.7678 | -640.959 | 0.6556052 | 0 | -0.027754603 | 0 | 0.10681789   |
| cov1_2_4_5_11    | 29.771  | -640.961 | 0.6558234 | 0 | 0.19245586   | 0 | -0.008536698 |
| cov2_5_9_10_11   | 29.7796 | -640.965 | 0.6569463 | 0 | 0            | 0 | 0.099084946  |
| cov1_2_5_10_11   | 29.787  | -640.969 | 0.6564317 | 0 | -0.02716631  | 0 | 0.10614148   |
| cov1_3_5_7_8     | 29.7905 | -640.971 | 0.6584728 | 0 | 0.14626554   | 0 | 0            |
| cov1_2_9_10_11   | 29.7943 | -640.972 | 0.6564122 | 0 | -0.002842447 | 0 | 0.10794441   |
| cov1_2_5_6_9     | 29.7969 | -640.974 | 0.6541157 | 0 | -0.083185684 | 0 | 0.10094275   |
| cov1_3_6_8_11    | 29.8006 | -640.976 | 0.6571947 | 0 | 0.014091479  | 0 | 0            |
| cov1_2_5_6_10    | 29.811  | -640.981 | 0.654946  | 0 | -0.083139534 | 0 | 0.10026052   |
| cov1_2_6_9_10    | 29.8162 | -640.983 | 0.6549102 | 0 | -0.06154677  | 0 | 0.10186456   |
| cov2_3_4_5_11    | 29.8451 | -640.998 | 0.6452559 | 0 | 0            | 0 | 0.13323289   |
| cov1_2_5_9_10    | 29.8663 | -641.008 | 0.6545868 | 0 | -0.050135784 | 0 | 0.10336044   |
| cov1_3_7_8_11    | 29.8757 | -641.013 | 0.6573977 | 0 | 0.083611715  | 0 | 0            |
| cov1_3_5_7_11    | 29.8933 | -641.022 | 0.6576261 | 0 | 0.13217283   | 0 | 0            |
| cov2_4_5_6_11    | 29.9358 | -641.043 | 0.6532781 | 0 | 0            | 0 | 0.036172997  |
| cov2_5_6_9_10    | 29.9416 | -641.046 | 0.6563827 | 0 | 0            | 0 | 0.084919647  |
| cov1_3_5_8_11    | 29.9775 | -641.064 | 0.6575474 | 0 | 0.1371569    | 0 | 0            |
| cov3_5_7_8_11    | 30.3239 | -641.237 | 0.6548027 | 0 | 0            | 0 | 0            |
| cov1_2_3_6_11    | 30.3487 | -641.25  | 0.6508128 | 0 | -0.048117149 | 0 | 0.11869965   |
| cov1_2_3_4_6     | 30.3973 | -641.274 | 0.6496359 | 0 | -0.059732323 | 0 | 0.1192942    |
| cov2_3_4_6_11    | 30.42   | -641.285 | 0.6521917 | 0 | 0            | 0 | 0.10818312   |
| cov1_3_5_6_11    | 30.4789 | -641.315 | 0.6568919 | 0 | 0.14898243   | 0 | 0            |
| cov5_6_9_10_11   | 30.4854 | -641.318 | 0.6598061 | 0 | 0            | 0 | 0            |
| cov1_5_6_9_11    | 30.5033 | -641.327 | 0.6594001 | 0 | -0.000160502 | 0 | 0            |
| cov1_5_6_10_11   | 30.5087 | -641.33  | 0.6601863 | 0 | -0.000969223 | 0 | 0            |
| cov1_6_9_10_11   | 30.5417 | -641.346 | 0.660451  | 0 | 0.02938663   | 0 | 0            |
| cov1_5_6_9_10    | 30.5714 | -641.361 | 0.6586271 | 0 | -0.018880499 | 0 | 0            |
| cov1_5_9_10_11   | 30.6391 | -641.395 | 0.6598863 | 0 | 0.044963555  | 0 | 0            |
| cov1_2_3_4_11    | 30.6827 | -641.417 | 0.6505514 | 0 | 0.022372685  | 0 | 0.12393715   |
| cov1_3_4_6_11    | 31.1068 | -641.629 | 0.6539604 | 0 | 0.000813382  | 0 | 0            |
| cov1_2_5_6_11    | 31.215  | -641.683 | 0.6549913 | 0 | 0.016441566  | 0 | 0.11516885   |
| cov1_2_4_6_11    | 31.2348 | -641.693 | 0.6532163 | 0 | -0.045372624 | 0 | 0.081717638  |
| cov4_5_6_7_8_9   | 33.595  | -639.268 | 0.654596  | 0 | 0            | 0 | 0            |
| cov4_5_6_7_8_10  | 33.6049 | -639.273 | 0.6554227 | 0 | 0            | 0 | 0            |
| cov2_4_5_7_8_9   | 33.6196 | -639.28  | 0.6535436 | 0 | 0            | 0 | 0.034638512  |
| cov2_4_5_7_8_10  | 33.6338 | -639.288 | 0.6543884 | 0 | 0            | 0 | 0.034312543  |
| cov1_4_5_7_8_9   | 33.6404 | -639.291 | 0.6547417 | 0 | 0.040075775  | 0 | 0            |
| cov1_4_5_7_8_10  | 33.6527 | -639.297 | 0.6555675 | 0 | 0.040118703  | 0 | 0            |
| cov4_5_7_8_9_11  | 33.6587 | -639.3   | 0.6531685 | 0 | 0            | 0 | 0            |
| cov4_5_7_8_10_11 | 33.6696 | -639.305 | 0.6540483 | 0 | 0            | 0 | 0            |

|                  |         |          |           |   |              |   |             |
|------------------|---------|----------|-----------|---|--------------|---|-------------|
| cov4_5_7_8_9_10  | 33.6918 | -639.317 | 0.6540609 | 0 | 0            | 0 | 0           |
| cov3_4_5_7_8_9   | 33.7073 | -639.324 | 0.653652  | 0 | 0            | 0 | 0           |
| cov2_4_5_6_7_9   | 33.715  | -639.328 | 0.654111  | 0 | 0            | 0 | 0.023007238 |
| cov3_4_5_7_8_10  | 33.7196 | -639.33  | 0.6545548 | 0 | 0            | 0 | 0           |
| cov2_4_5_6_7_10  | 33.7265 | -639.334 | 0.6549287 | 0 | 0            | 0 | 0.022388268 |
| cov3_4_5_6_7_9   | 33.7324 | -639.337 | 0.6540424 | 0 | 0            | 0 | 0           |
| cov4_5_6_7_9_11  | 33.7337 | -639.337 | 0.6540663 | 0 | 0            | 0 | 0           |
| cov4_5_6_7_9_10  | 33.7352 | -639.338 | 0.6548089 | 0 | 0            | 0 | 0           |
| cov3_4_5_6_7_10  | 33.7401 | -639.341 | 0.6548793 | 0 | 0            | 0 | 0           |
| cov1_4_5_6_7_9   | 33.7423 | -639.342 | 0.654658  | 0 | 0.013796291  | 0 | 0           |
| cov4_5_6_7_10_11 | 33.7431 | -639.342 | 0.6548951 | 0 | 0            | 0 | 0           |
| cov2_4_5_7_9_11  | 33.7446 | -639.343 | 0.6531299 | 0 | 0            | 0 | 0.029452016 |
| cov2_3_4_5_7_9   | 33.749  | -639.345 | 0.6529041 | 0 | 0            | 0 | 0.040869577 |
| cov2_4_5_7_9_10  | 33.7512 | -639.346 | 0.6538052 | 0 | 0            | 0 | 0.033947208 |
| cov1_4_5_6_7_10  | 33.7525 | -639.347 | 0.6554619 | 0 | 0.013220708  | 0 | 0           |
| cov1_2_4_5_7_9   | 33.7545 | -639.348 | 0.653945  | 0 | 0.017955821  | 0 | 0.026072477 |
| cov2_4_5_7_10_11 | 33.7574 | -639.349 | 0.6539693 | 0 | 0            | 0 | 0.028936193 |
| cov1_3_4_5_7_9   | 33.7601 | -639.351 | 0.6543192 | 0 | 0.056200194  | 0 | 0           |
| cov2_3_4_5_7_10  | 33.7617 | -639.352 | 0.6537519 | 0 | 0            | 0 | 0.040767487 |
| cov1_2_4_5_7_10  | 33.768  | -639.355 | 0.6547899 | 0 | 0.018569646  | 0 | 0.025447602 |
| cov1_4_5_7_9_11  | 33.7697 | -639.355 | 0.6541034 | 0 | 0.03086713   | 0 | 0           |
| cov1_3_4_5_7_10  | 33.7698 | -639.356 | 0.655129  | 0 | 0.056918256  | 0 | 0           |
| cov1_4_5_7_9_10  | 33.7729 | -639.357 | 0.6549729 | 0 | 0.038791549  | 0 | 0           |
| cov1_4_5_7_10_11 | 33.7809 | -639.361 | 0.6549111 | 0 | 0.030623534  | 0 | 0           |
| cov4_5_7_9_10_11 | 33.7872 | -639.364 | 0.6534766 | 0 | 0            | 0 | 0           |
| cov2_4_5_6_8_9   | 33.7886 | -639.365 | 0.6540652 | 0 | 0            | 0 | 0.0226632   |
| cov3_4_5_6_8_9   | 33.7958 | -639.369 | 0.653936  | 0 | 0            | 0 | 0           |
| cov3_4_5_7_9_11  | 33.7998 | -639.371 | 0.6528464 | 0 | 0            | 0 | 0           |
| cov2_4_5_6_8_10  | 33.8002 | -639.371 | 0.6548845 | 0 | 0            | 0 | 0.022042287 |
| cov3_4_5_6_8_10  | 33.803  | -639.372 | 0.6547491 | 0 | 0            | 0 | 0           |
| cov1_2_4_7_8_9   | 33.8058 | -639.374 | 0.6529369 | 0 | -0.053239406 | 0 | 0.056207541 |
| cov4_5_6_8_9_10  | 33.8078 | -639.375 | 0.6547823 | 0 | 0            | 0 | 0           |
| cov4_5_6_8_9_11  | 33.8078 | -639.375 | 0.6540277 | 0 | 0            | 0 | 0           |
| cov3_4_5_7_10_11 | 33.8097 | -639.375 | 0.6536785 | 0 | 0            | 0 | 0           |
| cov1_2_4_7_8_10  | 33.8125 | -639.377 | 0.653904  | 0 | -0.051418706 | 0 | 0.054872762 |
| cov2_3_4_5_8_9   | 33.8127 | -639.377 | 0.652728  | 0 | 0            | 0 | 0.042083592 |
| cov1_4_5_6_8_9   | 33.8141 | -639.378 | 0.654627  | 0 | 0.015008765  | 0 | 0           |
| cov1_3_4_5_8_9   | 33.8158 | -639.379 | 0.6542202 | 0 | 0.060365378  | 0 | 0           |
| cov4_5_6_8_10_11 | 33.8173 | -639.379 | 0.654855  | 0 | 0            | 0 | 0           |
| cov2_4_5_8_9_11  | 33.8187 | -639.38  | 0.6531221 | 0 | 0            | 0 | 0.029227405 |
| cov2_4_5_8_9_10  | 33.8235 | -639.382 | 0.6537683 | 0 | 0            | 0 | 0.033459227 |
| cov1_4_5_6_8_10  | 33.8244 | -639.383 | 0.6554304 | 0 | 0.014436246  | 0 | 0           |
| cov1_3_4_5_8_10  | 33.825  | -639.383 | 0.655033  | 0 | 0.061080561  | 0 | 0           |
| cov2_3_4_5_8_10  | 33.8252 | -639.383 | 0.6535807 | 0 | 0            | 0 | 0.041973195 |
| cov1_2_4_5_8_9   | 33.8258 | -639.384 | 0.6539395 | 0 | 0.01912819   | 0 | 0.025023023 |
| cov2_4_5_8_10_11 | 33.8315 | -639.386 | 0.6539291 | 0 | 0            | 0 | 0.028699638 |
| cov3_4_5_7_9_10  | 33.8353 | -639.388 | 0.6539841 | 0 | 0            | 0 | 0           |

|                  |         |          |           |   |              |   |             |
|------------------|---------|----------|-----------|---|--------------|---|-------------|
| cov1_2_4_5_8_10  | 33.8392 | -639.39  | 0.6547812 | 0 | 0.019746074  | 0 | 0.024401003 |
| cov1_4_5_8_9_11  | 33.8407 | -639.391 | 0.6541638 | 0 | 0.031850796  | 0 | 0           |
| cov1_4_5_8_9_10  | 33.8419 | -639.392 | 0.6549597 | 0 | 0.039068679  | 0 | 0           |
| cov1_4_5_8_10_11 | 33.8521 | -639.397 | 0.6549201 | 0 | 0.031613089  | 0 | 0           |
| cov4_5_8_9_10_11 | 33.8603 | -639.401 | 0.6534587 | 0 | 0            | 0 | 0           |
| cov3_4_5_8_9_11  | 33.8693 | -639.405 | 0.6526768 | 0 | 0            | 0 | 0           |
| cov3_4_5_8_10_11 | 33.8788 | -639.41  | 0.6535408 | 0 | 0            | 0 | 0           |
| cov1_2_4_6_7_9   | 33.9046 | -639.423 | 0.6528291 | 0 | -0.078756152 | 0 | 0.055502662 |
| cov3_4_5_8_9_10  | 33.9046 | -639.423 | 0.6538237 | 0 | 0            | 0 | 0           |
| cov1_2_4_6_7_10  | 33.9092 | -639.425 | 0.6537742 | 0 | -0.077554125 | 0 | 0.054176647 |
| cov1_4_6_7_8_10  | 33.9196 | -639.43  | 0.6551593 | 0 | -0.056436219 | 0 | 0           |
| cov1_4_6_7_8_9   | 33.9232 | -639.432 | 0.6542084 | 0 | -0.057024484 | 0 | 0           |
| cov1_2_4_7_9_10  | 33.9291 | -639.435 | 0.6532968 | 0 | -0.052798853 | 0 | 0.055190342 |
| cov1_2_4_7_9_11  | 33.9345 | -639.438 | 0.6523432 | 0 | -0.060900542 | 0 | 0.055286041 |
| cov1_2_4_7_10_11 | 33.9402 | -639.441 | 0.653295  | 0 | -0.059370569 | 0 | 0.053923012 |
| cov1_2_3_4_7_9   | 33.9463 | -639.444 | 0.6529295 | 0 | -0.053694944 | 0 | 0.055022831 |
| cov1_4_7_8_9_10  | 33.9528 | -639.447 | 0.6546788 | 0 | -0.027752469 | 0 | 0           |
| cov1_2_3_4_7_10  | 33.9533 | -639.447 | 0.6538571 | 0 | -0.051697106 | 0 | 0.054141636 |
| cov1_4_7_8_10_11 | 33.9564 | -639.449 | 0.6545177 | 0 | -0.036693345 | 0 | 0           |
| cov1_3_4_7_8_9   | 33.959  | -639.45  | 0.6545099 | 0 | -0.032271255 | 0 | 0           |
| cov1_4_7_8_9_11  | 33.9592 | -639.45  | 0.6535619 | 0 | -0.037555348 | 0 | 0           |
| cov1_3_4_7_8_10  | 33.961  | -639.451 | 0.6554316 | 0 | -0.030637115 | 0 | 0           |
| cov2_4_6_7_8_10  | 33.9758 | -639.459 | 0.6559048 | 0 | 0            | 0 | 0.032784363 |
| cov2_4_6_7_8_9   | 33.9775 | -639.459 | 0.6550215 | 0 | 0            | 0 | 0.033822303 |
| cov2_4_7_8_9_10  | 33.9852 | -639.463 | 0.6562324 | 0 | 0            | 0 | 0.023924489 |
| cov1_2_4_6_8_9   | 33.9853 | -639.463 | 0.6528009 | 0 | -0.077721072 | 0 | 0.054908798 |
| cov2_4_7_8_10_11 | 33.9867 | -639.464 | 0.6566545 | 0 | 0            | 0 | 0.029423661 |
| cov1_2_4_6_8_10  | 33.9898 | -639.466 | 0.6537483 | 0 | -0.076559548 | 0 | 0.053605454 |
| cov2_4_7_8_9_11  | 33.9899 | -639.466 | 0.6558508 | 0 | 0            | 0 | 0.030227685 |
| cov2_3_4_7_8_10  | 33.9976 | -639.469 | 0.6563566 | 0 | 0            | 0 | 0.027081256 |
| cov2_3_4_7_8_9   | 34.0041 | -639.473 | 0.6555777 | 0 | 0            | 0 | 0.027156421 |
| cov1_2_4_8_9_10  | 34.0065 | -639.474 | 0.6532671 | 0 | -0.052772844 | 0 | 0.054609307 |
| cov1_2_4_8_9_11  | 34.0141 | -639.478 | 0.6523548 | 0 | -0.060252859 | 0 | 0.054800147 |
| cov1_2_4_8_10_11 | 34.0196 | -639.48  | 0.6532841 | 0 | -0.058717006 | 0 | 0.053420201 |
| cov4_6_7_8_9_10  | 34.0232 | -639.482 | 0.655928  | 0 | 0            | 0 | 0           |
| cov1_2_3_4_8_9   | 34.0247 | -639.483 | 0.6527997 | 0 | -0.053108269 | 0 | 0.055788792 |
| cov4_7_8_9_10_11 | 34.0255 | -639.483 | 0.6562284 | 0 | 0            | 0 | 0           |
| cov3_4_7_8_9_10  | 34.0265 | -639.484 | 0.6563288 | 0 | 0            | 0 | 0           |
| cov1_2_3_4_8_10  | 34.0309 | -639.486 | 0.6537315 | 0 | -0.051109325 | 0 | 0.054894159 |
| cov3_4_6_7_8_10  | 34.039  | -639.49  | 0.6564773 | 0 | 0            | 0 | 0           |
| cov3_4_7_8_10_11 | 34.0414 | -639.491 | 0.6567472 | 0 | 0            | 0 | 0           |
| cov4_6_7_8_10_11 | 34.0415 | -639.491 | 0.6563759 | 0 | 0            | 0 | 0           |
| cov3_4_6_7_8_9   | 34.0435 | -639.492 | 0.6556223 | 0 | 0            | 0 | 0           |
| cov3_4_7_8_9_11  | 34.0468 | -639.494 | 0.6559565 | 0 | 0            | 0 | 0           |
| cov4_6_7_8_9_11  | 34.0475 | -639.494 | 0.6554968 | 0 | 0            | 0 | 0           |
| cov1_4_6_7_9_10  | 34.0478 | -639.495 | 0.6545946 | 0 | -0.054866281 | 0 | 0           |
| cov1_3_4_6_7_10  | 34.0542 | -639.498 | 0.6553208 | 0 | -0.05741166  | 0 | 0           |

|                  |         |          |           |   |              |   |             |
|------------------|---------|----------|-----------|---|--------------|---|-------------|
| cov1_3_4_6_7_9   | 34.0542 | -639.498 | 0.6544206 | 0 | -0.058382364 | 0 | 0           |
| cov1_4_6_7_10_11 | 34.0545 | -639.498 | 0.6545104 | 0 | -0.061382501 | 0 | 0           |
| cov1_4_6_7_9_11  | 34.0589 | -639.5   | 0.6535718 | 0 | -0.061785441 | 0 | 0           |
| cov1_4_7_9_10_11 | 34.0751 | -639.508 | 0.6538723 | 0 | -0.037775081 | 0 | 0           |
| cov1_3_4_7_9_10  | 34.0759 | -639.509 | 0.6548795 | 0 | -0.032374291 | 0 | 0           |
| cov1_3_4_7_9_11  | 34.0798 | -639.511 | 0.653825  | 0 | -0.042137486 | 0 | 0           |
| cov1_3_4_7_10_11 | 34.0809 | -639.511 | 0.6547255 | 0 | -0.040791996 | 0 | 0           |
| cov2_4_6_7_9_10  | 34.0943 | -639.518 | 0.6553405 | 0 | 0            | 0 | 0.033471484 |
| cov2_4_6_7_10_11 | 34.1105 | -639.526 | 0.6558755 | 0 | 0            | 0 | 0.034522775 |
| cov2_4_7_9_10_11 | 34.1109 | -639.526 | 0.6561966 | 0 | 0            | 0 | 0.029226662 |
| cov2_4_6_7_9_11  | 34.1115 | -639.526 | 0.6550599 | 0 | 0            | 0 | 0.035657153 |
| cov2_3_4_6_7_10  | 34.1126 | -639.527 | 0.6556921 | 0 | 0            | 0 | 0.034235173 |
| cov2_3_4_6_7_9   | 34.1144 | -639.528 | 0.6548445 | 0 | 0            | 0 | 0.034805467 |
| cov2_3_4_7_9_10  | 34.1241 | -639.533 | 0.655956  | 0 | 0            | 0 | 0.026118645 |
| cov1_4_6_8_9_10  | 34.125  | -639.533 | 0.6545546 | 0 | -0.054157502 | 0 | 0           |
| cov2_3_4_7_10_11 | 34.1265 | -639.534 | 0.656412  | 0 | 0            | 0 | 0.030983168 |
| cov2_3_4_7_9_11  | 34.1304 | -639.536 | 0.6556623 | 0 | 0            | 0 | 0.031329625 |
| cov1_4_6_8_10_11 | 34.1338 | -639.538 | 0.6545091 | 0 | -0.060124772 | 0 | 0           |
| cov1_4_6_8_9_11  | 34.1382 | -639.54  | 0.6535814 | 0 | -0.060525063 | 0 | 0           |
| cov1_3_4_6_8_10  | 34.1384 | -639.54  | 0.6552059 | 0 | -0.055756192 | 0 | 0           |
| cov1_3_4_6_8_9   | 34.1394 | -639.54  | 0.6542968 | 0 | -0.056717631 | 0 | 0           |
| cov1_4_8_9_10_11 | 34.1515 | -639.546 | 0.65395   | 0 | -0.037402934 | 0 | 0           |
| cov1_3_4_5_6_9   | 34.1556 | -639.548 | 0.6533632 | 0 | 0.085766014  | 0 | 0           |
| cov1_3_4_5_6_10  | 34.1563 | -639.549 | 0.6541591 | 0 | 0.085229582  | 0 | 0           |
| cov1_3_4_8_9_10  | 34.1577 | -639.55  | 0.6547663 | 0 | -0.031483601 | 0 | 0           |
| cov3_4_6_7_9_10  | 34.1585 | -639.55  | 0.6559666 | 0 | 0            | 0 | 0           |
| cov4_6_7_9_10_11 | 34.1631 | -639.552 | 0.6558125 | 0 | 0            | 0 | 0           |
| cov3_4_7_9_10_11 | 34.164  | -639.553 | 0.6563321 | 0 | 0            | 0 | 0           |
| cov1_3_4_8_9_11  | 34.1647 | -639.553 | 0.6537411 | 0 | -0.040648533 | 0 | 0           |
| cov1_3_4_8_10_11 | 34.1648 | -639.553 | 0.6546451 | 0 | -0.039310512 | 0 | 0           |
| cov2_4_6_8_9_10  | 34.1696 | -639.555 | 0.655285  | 0 | 0            | 0 | 0.03319655  |
| cov3_4_6_7_10_11 | 34.1772 | -639.559 | 0.6564047 | 0 | 0            | 0 | 0           |
| cov3_4_6_7_9_11  | 34.1812 | -639.561 | 0.6555681 | 0 | 0            | 0 | 0           |
| cov2_4_6_8_10_11 | 34.1853 | -639.563 | 0.6558924 | 0 | 0            | 0 | 0.03437072  |
| cov2_3_4_6_8_10  | 34.1859 | -639.564 | 0.6555368 | 0 | 0            | 0 | 0.035278536 |
| cov2_4_8_9_10_11 | 34.1862 | -639.564 | 0.6562059 | 0 | 0            | 0 | 0.02897639  |
| cov2_4_6_8_9_11  | 34.1863 | -639.564 | 0.654999  | 0 | 0            | 0 | 0.035520345 |
| cov2_3_4_6_8_9   | 34.1885 | -639.565 | 0.6546839 | 0 | 0            | 0 | 0.035860744 |
| cov1_2_3_4_5_9   | 34.1946 | -639.568 | 0.6527581 | 0 | 0.1002006    | 0 | 0.021279046 |
| cov1_3_4_5_9_10  | 34.1974 | -639.569 | 0.6537013 | 0 | 0.11485964   | 0 | 0           |
| cov2_3_4_8_9_10  | 34.1976 | -639.569 | 0.6558026 | 0 | 0            | 0 | 0.027178417 |
| cov1_2_3_4_5_10  | 34.1984 | -639.57  | 0.653577  | 0 | 0.10068588   | 0 | 0.020786348 |
| cov2_3_4_8_10_11 | 34.1988 | -639.57  | 0.6562631 | 0 | 0            | 0 | 0.032212433 |
| cov2_3_4_8_9_11  | 34.2033 | -639.572 | 0.6554982 | 0 | 0            | 0 | 0.032577213 |
| cov1_3_4_5_9_11  | 34.2139 | -639.578 | 0.6532313 | 0 | 0.11516849   | 0 | 0           |
| cov1_3_4_5_10_11 | 34.2167 | -639.579 | 0.6540301 | 0 | 0.11496932   | 0 | 0           |
| cov2_3_4_5_6_9   | 34.2256 | -639.583 | 0.6514988 | 0 | 0            | 0 | 0.042701541 |

|                  |         |          |           |   |              |   |             |
|------------------|---------|----------|-----------|---|--------------|---|-------------|
| cov2_3_4_5_6_10  | 34.2268 | -639.584 | 0.6523822 | 0 | 0            | 0 | 0.042122903 |
| cov3_4_6_8_9_10  | 34.2359 | -639.589 | 0.6558256 | 0 | 0            | 0 | 0           |
| cov4_6_8_9_10_11 | 34.2372 | -639.589 | 0.6557617 | 0 | 0            | 0 | 0           |
| cov1_2_3_7_8_9   | 34.2396 | -639.59  | 0.6531614 | 0 | -0.031544053 | 0 | 0.11201063  |
| cov3_4_8_9_10_11 | 34.2407 | -639.591 | 0.6561862 | 0 | 0            | 0 | 0           |
| cov1_2_6_7_8_9   | 34.2463 | -639.594 | 0.6539925 | 0 | -0.068247179 | 0 | 0.10784299  |
| cov1_2_3_7_8_10  | 34.2502 | -639.596 | 0.6540044 | 0 | -0.029602429 | 0 | 0.11148801  |
| cov3_4_6_8_10_11 | 34.2545 | -639.598 | 0.6562937 | 0 | 0            | 0 | 0           |
| cov3_4_6_8_9_11  | 34.2593 | -639.6   | 0.6554327 | 0 | 0            | 0 | 0           |
| cov1_2_6_7_8_10  | 34.2605 | -639.601 | 0.6547831 | 0 | -0.067098203 | 0 | 0.10732849  |
| cov1_2_5_7_8_9   | 34.2775 | -639.609 | 0.6535198 | 0 | -0.061839962 | 0 | 0.10902651  |
| cov2_3_5_7_8_9   | 34.2798 | -639.611 | 0.653993  | 0 | 0            | 0 | 0.10221778  |
| cov2_3_5_7_8_10  | 34.2875 | -639.614 | 0.6547805 | 0 | 0            | 0 | 0.10182253  |
| cov1_2_5_7_8_10  | 34.2906 | -639.616 | 0.6543857 | 0 | -0.061232227 | 0 | 0.10837884  |
| cov2_3_7_8_9_10  | 34.2992 | -639.62  | 0.6551289 | 0 | 0            | 0 | 0.087255124 |
| cov3_4_5_6_9_10  | 34.3058 | -639.624 | 0.6527669 | 0 | 0            | 0 | 0           |
| cov1_2_3_6_7_9   | 34.3121 | -639.627 | 0.6529595 | 0 | -0.065863819 | 0 | 0.1091933   |
| cov2_3_7_8_9_11  | 34.3128 | -639.627 | 0.6547988 | 0 | 0            | 0 | 0.089256834 |
| cov2_3_6_7_8_9   | 34.3144 | -639.628 | 0.6547383 | 0 | 0            | 0 | 0.087545993 |
| cov1_2_7_8_9_11  | 34.3145 | -639.628 | 0.653641  | 0 | -0.04004363  | 0 | 0.10983456  |
| cov2_3_7_8_10_11 | 34.3156 | -639.628 | 0.6555064 | 0 | 0            | 0 | 0.089584284 |
| cov2_3_6_7_8_10  | 34.3164 | -639.629 | 0.6555098 | 0 | 0            | 0 | 0.087389975 |
| cov3_4_5_6_10_11 | 34.3179 | -639.63  | 0.652835  | 0 | 0            | 0 | 0           |
| cov1_2_7_8_9_10  | 34.3192 | -639.63  | 0.6544409 | 0 | -0.032032132 | 0 | 0.11047214  |
| cov1_2_3_6_7_10  | 34.32   | -639.631 | 0.6537727 | 0 | -0.064606896 | 0 | 0.10864459  |
| cov3_4_5_6_9_11  | 34.3201 | -639.631 | 0.6519625 | 0 | 0            | 0 | 0           |
| cov1_2_7_8_10_11 | 34.3309 | -639.636 | 0.6544444 | 0 | -0.038467073 | 0 | 0.10926351  |
| cov1_2_5_6_7_9   | 34.3519 | -639.647 | 0.6533351 | 0 | -0.092322746 | 0 | 0.10653542  |
| cov1_2_5_6_7_10  | 34.3624 | -639.652 | 0.6541914 | 0 | -0.092305437 | 0 | 0.1058473   |
| cov1_2_3_7_9_11  | 34.3726 | -639.657 | 0.6525643 | 0 | -0.03960814  | 0 | 0.11094002  |
| cov1_2_3_7_9_10  | 34.3739 | -639.658 | 0.6534594 | 0 | -0.031024073 | 0 | 0.11162717  |
| cov1_2_3_5_7_9   | 34.3808 | -639.661 | 0.6530123 | 0 | -0.043569188 | 0 | 0.11100889  |
| cov1_2_3_6_8_9   | 34.3823 | -639.662 | 0.6528347 | 0 | -0.064827288 | 0 | 0.10928068  |
| cov1_2_3_7_10_11 | 34.3824 | -639.662 | 0.653392  | 0 | -0.037936466 | 0 | 0.11039167  |
| cov1_2_6_7_9_10  | 34.3878 | -639.665 | 0.6542081 | 0 | -0.065734885 | 0 | 0.10776331  |
| cov1_2_6_7_9_11  | 34.388  | -639.665 | 0.6535259 | 0 | -0.07095463  | 0 | 0.10739004  |
| cov1_2_3_6_8_10  | 34.3895 | -639.665 | 0.6536642 | 0 | -0.06360462  | 0 | 0.1087155   |
| cov1_2_3_5_7_10  | 34.3909 | -639.666 | 0.6538639 | 0 | -0.042353285 | 0 | 0.11042457  |
| cov2_5_7_8_9_10  | 34.393  | -639.667 | 0.6559659 | 0 | 0            | 0 | 0.089395424 |
| cov2_7_8_9_10_11 | 34.3942 | -639.668 | 0.6561672 | 0 | 0            | 0 | 0.087625193 |
| cov2_6_7_8_9_10  | 34.3961 | -639.669 | 0.6560894 | 0 | 0            | 0 | 0.086092147 |
| cov2_5_6_7_8_9   | 34.4008 | -639.671 | 0.6557168 | 0 | 0            | 0 | 0.088872082 |
| cov2_5_7_8_9_11  | 34.4009 | -639.671 | 0.6556843 | 0 | 0            | 0 | 0.090626046 |
| cov1_2_6_7_10_11 | 34.4018 | -639.672 | 0.6542895 | 0 | -0.069979937 | 0 | 0.10683442  |
| cov2_6_7_8_9_11  | 34.4035 | -639.672 | 0.6558894 | 0 | 0            | 0 | 0.087340916 |
| cov1_2_5_7_9_11  | 34.4045 | -639.673 | 0.6529024 | 0 | -0.069745762 | 0 | 0.10806627  |
| cov1_2_5_7_9_10  | 34.4054 | -639.673 | 0.6537735 | 0 | -0.062687246 | 0 | 0.10845477  |

|                  |         |          |           |   |              |   |             |
|------------------|---------|----------|-----------|---|--------------|---|-------------|
| cov2_5_6_7_8_10  | 34.4113 | -639.676 | 0.6564559 | 0 | 0            | 0 | 0.088278876 |
| cov2_5_7_8_10_11 | 34.4119 | -639.677 | 0.6564115 | 0 | 0            | 0 | 0.090110602 |
| cov2_3_5_6_7_9   | 34.4125 | -639.677 | 0.654105  | 0 | 0            | 0 | 0.097999628 |
| cov2_6_7_8_10_11 | 34.413  | -639.677 | 0.6566149 | 0 | 0            | 0 | 0.087068797 |
| cov2_3_5_7_9_10  | 34.416  | -639.679 | 0.6543036 | 0 | 0            | 0 | 0.10126536  |
| cov1_2_5_7_10_11 | 34.4166 | -639.679 | 0.6537558 | 0 | -0.069423957 | 0 | 0.10738522  |
| cov2_3_5_6_7_10  | 34.4183 | -639.68  | 0.6548999 | 0 | 0            | 0 | 0.097638293 |
| cov2_3_4_5_9_10  | 34.4233 | -639.682 | 0.6506002 | 0 | 0            | 0 | 0.063940337 |
| cov2_3_5_7_9_11  | 34.4265 | -639.684 | 0.6538248 | 0 | 0            | 0 | 0.10086863  |
| cov2_3_4_5_9_11  | 34.4273 | -639.684 | 0.6496764 | 0 | 0            | 0 | 0.060610576 |
| cov2_3_4_5_10_11 | 34.4322 | -639.687 | 0.6506168 | 0 | 0            | 0 | 0.060083494 |
| cov2_3_5_7_10_11 | 34.4336 | -639.687 | 0.6545764 | 0 | 0            | 0 | 0.10045536  |
| cov1_2_3_8_9_10  | 34.4405 | -639.691 | 0.6533427 | 0 | -0.030720073 | 0 | 0.11165079  |
| cov1_2_3_8_9_11  | 34.4417 | -639.691 | 0.6524805 | 0 | -0.038742031 | 0 | 0.11104127  |
| cov1_2_5_6_8_9   | 34.4428 | -639.692 | 0.6533129 | 0 | -0.091090933 | 0 | 0.10650498  |
| cov2_3_7_9_10_11 | 34.4446 | -639.693 | 0.6550832 | 0 | 0            | 0 | 0.089065688 |
| cov2_3_6_7_9_10  | 34.4457 | -639.693 | 0.6550032 | 0 | 0            | 0 | 0.088170509 |
| cov1_2_7_9_10_11 | 34.4465 | -639.694 | 0.6538457 | 0 | -0.039841239 | 0 | 0.10949988  |
| cov1_2_3_8_10_11 | 34.4508 | -639.696 | 0.6533052 | 0 | -0.037068876 | 0 | 0.1104858   |
| cov1_2_3_5_8_9   | 34.4509 | -639.696 | 0.6529155 | 0 | -0.039576274 | 0 | 0.11131791  |
| cov1_2_5_6_8_10  | 34.4533 | -639.697 | 0.6541507 | 0 | -0.091089734 | 0 | 0.1058371   |
| cov2_3_6_7_9_11  | 34.4593 | -639.7   | 0.6547275 | 0 | 0            | 0 | 0.089135615 |
| cov1_2_3_5_8_10  | 34.4603 | -639.701 | 0.6537731 | 0 | -0.038393005 | 0 | 0.11072427  |
| cov2_3_6_7_10_11 | 34.4621 | -639.702 | 0.6554803 | 0 | 0            | 0 | 0.088858473 |
| cov2_3_5_6_8_9   | 34.4725 | -639.707 | 0.6539818 | 0 | 0            | 0 | 0.099055237 |
| cov2_3_5_8_9_10  | 34.4775 | -639.709 | 0.6541333 | 0 | 0            | 0 | 0.10238587  |
| cov2_3_5_6_8_10  | 34.4779 | -639.71  | 0.6547403 | 0 | 0            | 0 | 0.098568391 |
| cov1_2_6_8_9_10  | 34.4787 | -639.71  | 0.6541736 | 0 | -0.064508455 | 0 | 0.10772893  |
| cov1_2_6_8_9_11  | 34.4804 | -639.711 | 0.6535461 | 0 | -0.069186536 | 0 | 0.10742418  |
| cov2_3_5_8_9_11  | 34.4885 | -639.715 | 0.6536519 | 0 | 0            | 0 | 0.10202784  |
| cov1_2_5_8_9_10  | 34.4923 | -639.717 | 0.6537852 | 0 | -0.062579746 | 0 | 0.1085109   |
| cov1_2_5_8_9_11  | 34.4935 | -639.717 | 0.6529292 | 0 | -0.068821613 | 0 | 0.10803844  |
| cov1_2_6_8_10_11 | 34.4943 | -639.718 | 0.6543249 | 0 | -0.068207429 | 0 | 0.10686686  |
| cov2_3_5_8_10_11 | 34.4952 | -639.718 | 0.6544097 | 0 | 0            | 0 | 0.10160567  |
| cov1_2_5_8_10_11 | 34.5056 | -639.723 | 0.6537755 | 0 | -0.068499085 | 0 | 0.10735979  |
| cov2_3_8_9_10_11 | 34.5095 | -639.725 | 0.6548763 | 0 | 0            | 0 | 0.089631945 |
| cov2_3_6_8_9_10  | 34.5109 | -639.726 | 0.6548661 | 0 | 0            | 0 | 0.0885509   |
| cov2_3_6_8_9_11  | 34.5247 | -639.733 | 0.6546076 | 0 | 0            | 0 | 0.089652531 |
| cov2_3_6_8_10_11 | 34.5269 | -639.734 | 0.6553582 | 0 | 0            | 0 | 0.089367608 |
| cov2_5_7_9_10_11 | 34.5325 | -639.737 | 0.6559102 | 0 | 0            | 0 | 0.089989982 |
| cov2_5_6_7_9_10  | 34.5329 | -639.737 | 0.6558945 | 0 | 0            | 0 | 0.088895562 |
| cov2_6_7_9_10_11 | 34.5343 | -639.738 | 0.6560396 | 0 | 0            | 0 | 0.087797923 |
| cov1_2_8_9_10_11 | 34.5353 | -639.738 | 0.6538628 | 0 | -0.038972222 | 0 | 0.10947227  |
| cov2_5_6_7_9_11  | 34.5405 | -639.741 | 0.6556887 | 0 | 0            | 0 | 0.089855266 |
| cov2_5_6_7_10_11 | 34.5511 | -639.746 | 0.6563347 | 0 | 0            | 0 | 0.089283797 |
| cov2_5_8_9_10_11 | 34.6178 | -639.78  | 0.6558965 | 0 | 0            | 0 | 0.090195235 |
| cov2_5_6_8_9_10  | 34.6188 | -639.78  | 0.6557982 | 0 | 0            | 0 | 0.089072269 |



|                  |         |          |           |   |              |   |             |
|------------------|---------|----------|-----------|---|--------------|---|-------------|
| cov3_4_5_9_10_11 | 34.6191 | -639.78  | 0.6503995 | 0 | 0            | 0 | 0           |
| cov2_6_8_9_10_11 | 34.6192 | -639.78  | 0.6560045 | 0 | 0            | 0 | 0.088283752 |
| cov2_5_6_8_9_11  | 34.626  | -639.784 | 0.6556439 | 0 | 0            | 0 | 0.090163775 |
| cov2_5_6_8_10_11 | 34.6367 | -639.789 | 0.6563884 | 0 | 0            | 0 | 0.089546693 |
| cov1_2_3_4_6_10  | 34.8958 | -639.919 | 0.6517078 | 0 | -0.070328007 | 0 | 0.071763086 |
| cov1_4_5_6_7_8   | 34.9    | -639.921 | 0.6550637 | 0 | 0.091422995  | 0 | 0           |
| cov1_2_3_4_6_9   | 34.9121 | -639.927 | 0.6506584 | 0 | -0.071720287 | 0 | 0.073087686 |
| cov1_2_3_4_9_10  | 34.9367 | -639.939 | 0.6512906 | 0 | -0.040692517 | 0 | 0.072402137 |
| cov2_4_5_6_7_8   | 34.9444 | -639.943 | 0.6528562 | 0 | 0            | 0 | 0.055027878 |
| cov2_3_5_6_9_10  | 34.9483 | -639.945 | 0.6525289 | 0 | 0            | 0 | 0.11059831  |
| cov1_2_3_4_10_11 | 34.9558 | -639.949 | 0.6520667 | 0 | -0.035504112 | 0 | 0.072538565 |
| cov1_2_3_5_6_10  | 34.9617 | -639.951 | 0.6526651 | 0 | -0.012592272 | 0 | 0.112657    |
| cov2_3_5_6_10_11 | 34.9628 | -639.952 | 0.6530846 | 0 | 0            | 0 | 0.11117684  |
| cov1_2_3_5_6_9   | 34.964  | -639.953 | 0.6518237 | 0 | -0.012545442 | 0 | 0.11334232  |
| cov2_3_5_6_9_11  | 34.9646 | -639.953 | 0.6523145 | 0 | 0            | 0 | 0.11190537  |
| cov1_2_3_4_9_11  | 34.969  | -639.955 | 0.6510173 | 0 | -0.037059221 | 0 | 0.073894866 |
| cov2_3_4_9_10_11 | 35.0059 | -639.974 | 0.6536082 | 0 | 0            | 0 | 0.057642774 |
| cov1_2_4_5_6_7   | 35.0086 | -639.975 | 0.6540446 | 0 | 0.067751659  | 0 | 0.030514422 |
| cov2_3_4_6_10_11 | 35.0234 | -639.982 | 0.6540342 | 0 | 0            | 0 | 0.057067185 |
| cov1_2_4_5_7_8   | 35.0322 | -639.987 | 0.6540505 | 0 | 0.12363138   | 0 | 0.031721829 |
| cov1_3_4_5_6_7   | 35.0342 | -639.988 | 0.6547507 | 0 | 0.10558826   | 0 | 0           |
| cov1_2_3_5_9_10  | 35.0416 | -639.991 | 0.6523393 | 0 | 0.023109501  | 0 | 0.11579051  |
| cov2_3_4_6_9_11  | 35.0427 | -639.992 | 0.6531577 | 0 | 0            | 0 | 0.058135584 |
| cov1_4_5_6_7_11  | 35.0454 | -639.993 | 0.6546762 | 0 | 0.089747203  | 0 | 0           |
| cov2_3_4_6_9_10  | 35.047  | -639.994 | 0.6529744 | 0 | 0            | 0 | 0.053471993 |
| cov2_3_5_9_10_11 | 35.0568 | -639.999 | 0.651606  | 0 | 0            | 0 | 0.12149143  |
| cov3_6_7_8_10_11 | 35.0606 | -640.001 | 0.657767  | 0 | 0            | 0 | 0           |
| cov1_2_3_5_9_11  | 35.0612 | -640.001 | 0.651964  | 0 | 0.024806795  | 0 | 0.11635459  |
| cov1_2_3_5_10_11 | 35.0616 | -640.001 | 0.6528402 | 0 | 0.025076591  | 0 | 0.11564648  |
| cov3_6_7_8_9_11  | 35.0623 | -640.002 | 0.6570274 | 0 | 0            | 0 | 0           |
| cov1_3_4_5_7_8   | 35.0645 | -640.003 | 0.6547762 | 0 | 0.16258374   | 0 | 0           |
| cov3_5_6_7_8_10  | 35.0656 | -640.003 | 0.6583938 | 0 | 0            | 0 | 0           |
| cov1_4_5_7_8_11  | 35.0661 | -640.004 | 0.6544971 | 0 | 0.14358612   | 0 | 0           |
| cov3_5_6_7_8_9   | 35.068  | -640.005 | 0.6576172 | 0 | 0            | 0 | 0           |
| cov3_6_7_8_9_10  | 35.0723 | -640.007 | 0.6579465 | 0 | 0            | 0 | 0           |
| cov1_2_3_6_9_10  | 35.076  | -640.009 | 0.6515444 | 0 | -0.062358323 | 0 | 0.10924158  |
| cov2_4_5_6_7_11  | 35.0833 | -640.012 | 0.6523127 | 0 | 0            | 0 | 0.052688651 |
| cov1_3_6_7_8_10  | 35.0835 | -640.012 | 0.6584595 | 0 | 0.011615094  | 0 | 0           |
| cov5_6_7_8_9_10  | 35.0841 | -640.013 | 0.6586605 | 0 | 0            | 0 | 0           |
| cov1_3_6_7_8_9   | 35.0844 | -640.013 | 0.6576967 | 0 | 0.010774508  | 0 | 0           |
| cov1_5_6_7_8_10  | 35.0849 | -640.013 | 0.6585947 | 0 | -0.025716954 | 0 | 0           |
| cov1_5_6_7_8_9   | 35.0849 | -640.013 | 0.6577924 | 0 | -0.024954384 | 0 | 0           |
| cov1_2_4_5_6_8   | 35.0851 | -640.013 | 0.6540292 | 0 | 0.069974793  | 0 | 0.029452829 |
| cov1_2_3_6_10_11 | 35.0901 | -640.016 | 0.6522881 | 0 | -0.058012783 | 0 | 0.10947148  |
| cov5_6_7_8_9_11  | 35.0905 | -640.016 | 0.6579565 | 0 | 0            | 0 | 0           |
| cov5_6_7_8_10_11 | 35.091  | -640.016 | 0.6587346 | 0 | 0            | 0 | 0           |
| cov4_5_6_7_8_11  | 35.0946 | -640.018 | 0.6532444 | 0 | 0            | 0 | 0           |

|                  |         |          |           |   |              |   |             |
|------------------|---------|----------|-----------|---|--------------|---|-------------|
| cov1_3_4_5_6_8   | 35.0969 | -640.019 | 0.6546487 | 0 | 0.11057472   | 0 | 0           |
| cov2_3_4_5_6_7   | 35.0969 | -640.019 | 0.6526308 | 0 | 0            | 0 | 0.056889125 |
| cov1_2_3_6_9_11  | 35.0997 | -640.02  | 0.651389  | 0 | -0.059052878 | 0 | 0.11018667  |
| cov1_4_5_6_8_11  | 35.1202 | -640.031 | 0.6546696 | 0 | 0.091593292  | 0 | 0           |
| cov6_7_8_9_10_11 | 35.1223 | -640.032 | 0.658386  | 0 | 0            | 0 | 0           |
| cov3_4_5_6_7_8   | 35.1254 | -640.033 | 0.6542454 | 0 | 0            | 0 | 0           |
| cov1_6_7_8_9_11  | 35.1348 | -640.038 | 0.6580491 | 0 | 0.000910047  | 0 | 0           |
| cov1_3_4_6_9_10  | 35.1377 | -640.039 | 0.6530012 | 0 | -0.043209526 | 0 | 0           |
| cov1_6_7_8_10_11 | 35.1399 | -640.041 | 0.6587972 | 0 | 0.001501029  | 0 | 0           |
| cov1_6_7_8_9_10  | 35.1437 | -640.042 | 0.6590058 | 0 | 0.010053691  | 0 | 0           |
| cov1_3_4_6_10_11 | 35.1525 | -640.047 | 0.65372   | 0 | -0.038932694 | 0 | 0           |
| cov1_2_3_4_5_7   | 35.1545 | -640.048 | 0.6537149 | 0 | 0.1341194    | 0 | 0.033400617 |
| cov5_7_8_9_10_11 | 35.1573 | -640.049 | 0.657409  | 0 | 0            | 0 | 0           |
| cov1_2_3_9_10_11 | 35.1591 | -640.05  | 0.6518223 | 0 | -0.0231496   | 0 | 0.11246673  |
| cov1_2_4_5_7_11  | 35.1593 | -640.05  | 0.6535516 | 0 | 0.11703301   | 0 | 0.031158073 |
| cov2_4_5_6_8_11  | 35.1674 | -640.054 | 0.6522685 | 0 | 0            | 0 | 0.052635578 |
| cov3_5_7_8_10_11 | 35.1693 | -640.055 | 0.6573155 | 0 | 0            | 0 | 0           |
| cov3_5_7_8_9_11  | 35.17   | -640.056 | 0.6565004 | 0 | 0            | 0 | 0           |
| cov1_5_7_8_9_11  | 35.1765 | -640.059 | 0.6571524 | 0 | 0.00573604   | 0 | 0           |
| cov2_3_4_5_6_8   | 35.1769 | -640.059 | 0.6524557 | 0 | 0            | 0 | 0.058155594 |
| cov1_5_7_8_10_11 | 35.1777 | -640.059 | 0.6579726 | 0 | 0.005140237  | 0 | 0           |
| cov1_3_4_6_9_11  | 35.178  | -640.06  | 0.6527242 | 0 | -0.039424395 | 0 | 0           |
| cov2_3_6_9_10_11 | 35.1784 | -640.06  | 0.6536512 | 0 | 0            | 0 | 0.093469562 |
| cov3_4_6_9_10_11 | 35.1861 | -640.064 | 0.6543369 | 0 | 0            | 0 | 0           |
| cov1_3_7_8_9_11  | 35.1901 | -640.066 | 0.6571289 | 0 | 0.046760303  | 0 | 0           |
| cov1_3_7_8_10_11 | 35.1911 | -640.066 | 0.6579012 | 0 | 0.047957399  | 0 | 0           |
| cov1_5_7_8_9_10  | 35.1911 | -640.066 | 0.6583524 | 0 | 0.018020918  | 0 | 0           |
| cov1_3_4_5_7_11  | 35.1921 | -640.067 | 0.6542178 | 0 | 0.15345507   | 0 | 0           |
| cov1_3_5_7_8_9   | 35.1966 | -640.069 | 0.6576977 | 0 | 0.031553116  | 0 | 0           |
| cov1_3_5_7_8_10  | 35.1971 | -640.069 | 0.6585129 | 0 | 0.032023885  | 0 | 0           |
| cov1_3_4_9_10_11 | 35.2006 | -640.071 | 0.6531781 | 0 | -0.008868237 | 0 | 0           |
| cov3_5_6_7_10_11 | 35.2031 | -640.072 | 0.6578371 | 0 | 0            | 0 | 0           |
| cov3_6_7_9_10_11 | 35.2031 | -640.072 | 0.6572863 | 0 | 0            | 0 | 0           |
| cov3_5_7_8_9_10  | 35.2033 | -640.072 | 0.6576716 | 0 | 0            | 0 | 0           |
| cov3_5_6_7_9_10  | 35.2045 | -640.073 | 0.6579419 | 0 | 0            | 0 | 0           |
| cov3_5_6_7_9_11  | 35.2061 | -640.074 | 0.6570722 | 0 | 0            | 0 | 0           |
| cov1_3_7_8_9_10  | 35.2084 | -640.075 | 0.6583395 | 0 | 0.061373741  | 0 | 0           |
| cov1_5_6_7_10_11 | 35.2132 | -640.077 | 0.6578381 | 0 | -0.033176566 | 0 | 0           |
| cov1_5_6_7_9_11  | 35.2142 | -640.078 | 0.6570471 | 0 | -0.03220483  | 0 | 0           |
| cov1_2_3_4_5_8   | 35.2157 | -640.078 | 0.6536403 | 0 | 0.13875176   | 0 | 0.032881956 |
| cov1_5_6_7_9_10  | 35.2181 | -640.08  | 0.6580781 | 0 | -0.024306617 | 0 | 0           |
| cov1_3_6_7_10_11 | 35.2188 | -640.08  | 0.6577352 | 0 | 0.004383689  | 0 | 0           |
| cov1_3_5_6_7_10  | 35.2189 | -640.08  | 0.6582044 | 0 | -0.011116515 | 0 | 0           |
| cov1_3_6_7_9_11  | 35.2203 | -640.081 | 0.6569864 | 0 | 0.003729457  | 0 | 0           |
| cov1_3_5_6_7_9   | 35.2211 | -640.081 | 0.6574177 | 0 | -0.011089913 | 0 | 0           |
| cov5_6_7_9_10_11 | 35.2214 | -640.081 | 0.6581971 | 0 | 0            | 0 | 0           |
| cov1_3_6_7_9_10  | 35.2262 | -640.084 | 0.6580212 | 0 | 0.013446792  | 0 | 0           |

|                  |         |          |           |   |              |   |              |
|------------------|---------|----------|-----------|---|--------------|---|--------------|
| cov1_2_4_5_8_11  | 35.2315 | -640.086 | 0.6535796 | 0 | 0.11872808   | 0 | 0.030207429  |
| cov3_4_5_6_7_11  | 35.243  | -640.092 | 0.6533569 | 0 | 0            | 0 | 0            |
| cov1_7_8_9_10_11 | 35.2463 | -640.094 | 0.6584745 | 0 | 0.04556682   | 0 | 0            |
| cov1_3_4_5_8_11  | 35.2534 | -640.097 | 0.6541516 | 0 | 0.15823675   | 0 | 0            |
| cov1_6_7_9_10_11 | 35.2739 | -640.108 | 0.6582923 | 0 | 0.003091592  | 0 | 0            |
| cov3_6_8_9_10_11 | 35.277  | -640.109 | 0.6571529 | 0 | 0            | 0 | 0            |
| cov3_5_6_8_10_11 | 35.2793 | -640.11  | 0.6576809 | 0 | 0            | 0 | 0            |
| cov3_5_6_8_9_10  | 35.2802 | -640.111 | 0.6577856 | 0 | 0            | 0 | 0            |
| cov3_5_6_8_9_11  | 35.283  | -640.112 | 0.6569154 | 0 | 0            | 0 | 0            |
| cov3_5_7_9_10_11 | 35.2899 | -640.116 | 0.656881  | 0 | 0            | 0 | 0            |
| cov1_3_6_8_10_11 | 35.292  | -640.117 | 0.6576448 | 0 | 0.006000412  | 0 | 0            |
| cov1_3_6_8_9_11  | 35.2944 | -640.118 | 0.6568797 | 0 | 0.005349743  | 0 | 0            |
| cov1_3_5_6_8_10  | 35.2964 | -640.119 | 0.6580928 | 0 | -0.006132633 | 0 | 0            |
| cov1_5_7_9_10_11 | 35.2965 | -640.119 | 0.6574329 | 0 | 0.003871796  | 0 | 0            |
| cov1_3_6_8_9_10  | 35.2971 | -640.119 | 0.6578898 | 0 | 0.014528007  | 0 | 0            |
| cov1_3_5_6_8_9   | 35.2993 | -640.12  | 0.6573085 | 0 | -0.006086148 | 0 | 0            |
| cov1_3_5_7_10_11 | 35.3041 | -640.123 | 0.6575881 | 0 | 0.016555786  | 0 | 0            |
| cov1_3_5_7_9_11  | 35.305  | -640.123 | 0.6567917 | 0 | 0.016338396  | 0 | 0            |
| cov1_5_6_8_10_11 | 35.3062 | -640.124 | 0.6578517 | 0 | -0.031375402 | 0 | 0            |
| cov1_5_6_8_9_11  | 35.3071 | -640.124 | 0.6570615 | 0 | -0.030405903 | 0 | 0            |
| cov1_5_6_8_9_10  | 35.3083 | -640.125 | 0.6580585 | 0 | -0.023108263 | 0 | 0            |
| cov5_6_8_9_10_11 | 35.3116 | -640.126 | 0.6581857 | 0 | 0            | 0 | 0            |
| cov1_3_7_9_10_11 | 35.3182 | -640.13  | 0.6574351 | 0 | 0.046860354  | 0 | 0            |
| cov1_3_5_7_9_10  | 35.32   | -640.131 | 0.6580182 | 0 | 0.028981409  | 0 | 0            |
| cov3_4_5_6_8_11  | 35.3318 | -640.137 | 0.6532098 | 0 | 0            | 0 | 0            |
| cov1_6_8_9_10_11 | 35.3668 | -640.154 | 0.6583021 | 0 | 0.004882237  | 0 | 0            |
| cov3_5_8_9_10_11 | 35.3722 | -640.157 | 0.6567029 | 0 | 0            | 0 | 0            |
| cov1_3_5_8_10_11 | 35.3817 | -640.161 | 0.6575122 | 0 | 0.021441349  | 0 | 0            |
| cov1_3_5_8_9_11  | 35.3833 | -640.162 | 0.6567159 | 0 | 0.021251934  | 0 | 0            |
| cov3_7_8_9_10_11 | 35.3849 | -640.163 | 0.6550204 | 0 | 0            | 0 | 0            |
| cov1_5_8_9_10_11 | 35.385  | -640.163 | 0.6574477 | 0 | 0.004778247  | 0 | 0            |
| cov1_3_8_9_10_11 | 35.3883 | -640.165 | 0.657337  | 0 | 0.047811082  | 0 | 0            |
| cov1_3_5_8_9_10  | 35.3949 | -640.168 | 0.6579097 | 0 | 0.033242641  | 0 | 0            |
| cov2_4_5_7_8_11  | 35.3981 | -640.17  | 0.6492014 | 0 | 0            | 0 | 0.092465639  |
| cov1_4_5_6_9_11  | 35.4164 | -640.179 | 0.6559956 | 0 | 0.042261272  | 0 | 0            |
| cov1_4_5_6_10_11 | 35.4334 | -640.187 | 0.6567775 | 0 | 0.04174641   | 0 | 0            |
| cov4_5_6_9_10_11 | 35.4457 | -640.194 | 0.6555602 | 0 | 0            | 0 | 0            |
| cov1_4_5_9_10_11 | 35.4561 | -640.199 | 0.6561926 | 0 | 0.067975852  | 0 | 0            |
| cov2_3_4_5_7_8   | 35.457  | -640.199 | 0.6509232 | 0 | 0            | 0 | 0.093637458  |
| cov2_4_5_6_9_11  | 35.4572 | -640.199 | 0.6551859 | 0 | 0            | 0 | 0.002207431  |
| cov1_2_4_5_9_11  | 35.4574 | -640.199 | 0.6562258 | 0 | 0.079801395  | 0 | -0.013588886 |
| cov2_4_5_6_10_11 | 35.4732 | -640.207 | 0.6560301 | 0 | 0            | 0 | 0.001436133  |
| cov1_2_4_5_6_9   | 35.4746 | -640.208 | 0.6554833 | 0 | 0.041306853  | 0 | -0.018140284 |
| cov1_2_4_5_10_11 | 35.4757 | -640.208 | 0.6570405 | 0 | 0.080459206  | 0 | -0.014320573 |
| cov1_4_5_6_9_10  | 35.4795 | -640.21  | 0.6551731 | 0 | 0.025416874  | 0 | 0            |
| cov1_2_4_5_6_10  | 35.4894 | -640.215 | 0.6562036 | 0 | 0.041476608  | 0 | -0.018849727 |
| cov2_4_5_6_9_10  | 35.4938 | -640.218 | 0.6549304 | 0 | 0            | 0 | -0.005230567 |

|                  |         |          |           |   |              |   |              |
|------------------|---------|----------|-----------|---|--------------|---|--------------|
| cov2_3_4_5_7_11  | 35.5    | -640.221 | 0.6499784 | 0 | 0            | 0 | 0.082582427  |
| cov1_2_4_5_9_10  | 35.5031 | -640.222 | 0.655681  | 0 | 0.065326242  | 0 | -0.017914235 |
| cov1_2_3_4_5_6   | 35.534  | -640.238 | 0.6529856 | 0 | 0.15017851   | 0 | 0.024943159  |
| cov2_3_5_6_7_8   | 35.5533 | -640.247 | 0.6530453 | 0 | 0            | 0 | 0.11781145   |
| cov1_3_4_5_6_11  | 35.5578 | -640.25  | 0.6539857 | 0 | 0.17142078   | 0 | 0            |
| cov1_2_5_6_7_8   | 35.5852 | -640.263 | 0.653266  | 0 | -0.021862424 | 0 | 0.11680602   |
| cov2_3_4_5_8_11  | 35.5928 | -640.267 | 0.6497749 | 0 | 0            | 0 | 0.084284009  |
| cov2_4_5_9_10_11 | 35.5935 | -640.267 | 0.6541178 | 0 | 0            | 0 | 0.018288596  |
| cov2_5_6_7_8_11  | 35.5967 | -640.269 | 0.6537454 | 0 | 0            | 0 | 0.11183411   |
| cov1_2_4_6_7_8   | 35.6979 | -640.32  | 0.6519967 | 0 | -0.070334275 | 0 | 0.099297929  |
| cov2_3_5_6_7_11  | 35.7036 | -640.322 | 0.6528212 | 0 | 0            | 0 | 0.11719221   |
| cov1_2_3_5_6_7   | 35.7047 | -640.323 | 0.6528824 | 0 | -0.005104958 | 0 | 0.11863331   |
| cov1_2_5_6_7_11  | 35.7296 | -640.335 | 0.6529654 | 0 | -0.022622892 | 0 | 0.11663289   |
| cov1_2_3_4_5_11  | 35.732  | -640.337 | 0.6531023 | 0 | 0.21291869   | 0 | 0.026052657  |
| cov1_2_3_6_7_8   | 35.7388 | -640.34  | 0.6526166 | 0 | -0.066592035 | 0 | 0.11472036   |
| cov1_2_6_7_8_11  | 35.752  | -640.347 | 0.6520903 | 0 | -0.068587134 | 0 | 0.11514733   |
| cov1_2_3_4_6_7   | 35.7574 | -640.349 | 0.652677  | 0 | -0.07153952  | 0 | 0.085949424  |
| cov2_3_5_6_8_11  | 35.7826 | -640.362 | 0.6526483 | 0 | 0            | 0 | 0.11842509   |
| cov1_2_3_5_6_8   | 35.784  | -640.363 | 0.6527817 | 0 | -0.000188157 | 0 | 0.1190268    |
| cov1_2_3_5_7_8   | 35.7951 | -640.368 | 0.6530749 | 0 | 0.055997338  | 0 | 0.1239058    |
| cov3_4_5_7_8_11  | 35.8006 | -640.371 | 0.6509974 | 0 | 0            | 0 | 0            |
| cov2_3_4_6_7_8   | 35.8032 | -640.372 | 0.6544649 | 0 | 0            | 0 | 0.067648883  |
| cov1_2_5_7_8_11  | 35.8087 | -640.375 | 0.6529205 | 0 | 0.03528193   | 0 | 0.12152543   |
| cov1_2_5_6_8_11  | 35.825  | -640.383 | 0.6529681 | 0 | -0.020710689 | 0 | 0.11667344   |
| cov1_2_3_4_7_8   | 35.832  | -640.387 | 0.6527908 | 0 | -0.015428053 | 0 | 0.088895354  |
| cov1_2_4_6_7_11  | 35.8401 | -640.391 | 0.6517005 | 0 | -0.070582353 | 0 | 0.0991156    |
| cov2_3_4_7_8_11  | 35.8496 | -640.395 | 0.6535898 | 0 | 0            | 0 | 0.079297374  |
| cov2_3_5_7_8_11  | 35.8519 | -640.397 | 0.6511655 | 0 | 0            | 0 | 0.13466874   |
| cov2_4_6_7_8_11  | 35.8577 | -640.399 | 0.6540064 | 0 | 0            | 0 | 0.081826477  |
| cov1_2_3_4_6_8   | 35.868  | -640.405 | 0.652525  | 0 | -0.069799151 | 0 | 0.087060504  |
| cov1_2_3_6_7_11  | 35.8786 | -640.41  | 0.6523688 | 0 | -0.066956627 | 0 | 0.11449651   |
| cov2_3_6_7_8_11  | 35.8837 | -640.412 | 0.6545143 | 0 | 0            | 0 | 0.095677451  |
| cov1_2_3_5_7_11  | 35.9215 | -640.431 | 0.6525687 | 0 | 0.048101466  | 0 | 0.12292541   |
| cov2_3_4_6_7_11  | 35.9224 | -640.432 | 0.6546677 | 0 | 0            | 0 | 0.069333279  |
| cov1_2_4_7_8_11  | 35.9296 | -640.435 | 0.6515221 | 0 | -0.013817604 | 0 | 0.10338315   |
| cov1_3_5_6_9_10  | 35.9306 | -640.436 | 0.656605  | 0 | 0.055762882  | 0 | 0            |
| cov1_2_4_6_8_11  | 35.933  | -640.437 | 0.6516904 | 0 | -0.068912781 | 0 | 0.098731184  |
| cov1_3_5_6_10_11 | 35.9443 | -640.443 | 0.6568547 | 0 | 0.055528526  | 0 | 0            |
| cov1_2_3_4_7_11  | 35.9467 | -640.444 | 0.6523447 | 0 | -0.021437102 | 0 | 0.087633567  |
| cov1_3_5_6_9_11  | 35.9581 | -640.45  | 0.6560796 | 0 | 0.056521853  | 0 | 0            |
| cov1_2_4_6_9_11  | 35.9592 | -640.45  | 0.654492  | 0 | -0.063366927 | 0 | 0.033707586  |
| cov1_2_4_6_10_11 | 35.9631 | -640.452 | 0.6554722 | 0 | -0.062248518 | 0 | 0.032184211  |
| cov1_2_3_7_8_11  | 35.9662 | -640.454 | 0.6523317 | 0 | -0.010606807 | 0 | 0.11931607   |
| cov2_3_4_5_6_11  | 35.9775 | -640.459 | 0.6500998 | 0 | 0            | 0 | 0.075542524  |
| cov1_2_3_6_8_11  | 35.9821 | -640.462 | 0.6522739 | 0 | -0.065008304 | 0 | 0.11473869   |
| cov1_2_4_9_10_11 | 35.991  | -640.466 | 0.6548963 | 0 | -0.035370293 | 0 | 0.03308409   |
| cov1_4_6_9_10_11 | 35.9936 | -640.467 | 0.655648  | 0 | -0.050135177 | 0 | 0            |

|                    |         |          |           |   |              |              |
|--------------------|---------|----------|-----------|---|--------------|--------------|
| cov3_5_6_9_10_11   | 35.9979 | -640.47  | 0.6555203 | 0 | 0            | 0            |
| cov1_2_3_5_8_11    | 35.9983 | -640.47  | 0.652508  | 0 | 0.052723725  | 0.12331132   |
| cov1_3_4_6_7_8     | 36.0052 | -640.473 | 0.6555306 | 0 | -0.039340817 | 0            |
| cov1_3_6_9_10_11   | 36.0069 | -640.474 | 0.6559509 | 0 | 0.017017377  | 0            |
| cov2_3_4_6_8_11    | 36.0239 | -640.483 | 0.6545024 | 0 | 0            | 0.0709099    |
| cov1_2_4_6_9_10    | 36.0257 | -640.483 | 0.6537327 | 0 | -0.079335619 | 0.028616783  |
| cov1_2_3_4_8_11    | 36.0531 | -640.497 | 0.652247  | 0 | -0.019943549 | 0.088705794  |
| cov2_4_6_9_10_11   | 36.0585 | -640.5   | 0.6567931 | 0 | 0            | 0.018426874  |
| cov3_4_6_7_8_11    | 36.0635 | -640.502 | 0.6562107 | 0 | 0            | 0            |
| cov1_3_5_9_10_11   | 36.0835 | -640.512 | 0.6564894 | 0 | 0.10131036   | 0            |
| cov1_3_4_6_7_11    | 36.1318 | -640.537 | 0.6551413 | 0 | -0.04202781  | 0            |
| cov1_3_4_7_8_11    | 36.2246 | -640.583 | 0.6550226 | 0 | 0.014250365  | 0            |
| cov1_3_4_6_8_11    | 36.2536 | -640.597 | 0.6550462 | 0 | -0.039194292 | 0            |
| cov1_4_6_7_8_11    | 36.2602 | -640.601 | 0.6543503 | 0 | -0.028329377 | 0            |
| cov1_2_3_5_6_11    | 36.4762 | -640.709 | 0.6521731 | 0 | 0.06899689   | 0.1248521    |
| cov1_5_6_7_8_11    | 36.6439 | -640.793 | 0.657866  | 0 | 0.053053263  | 0            |
| cov1_3_5_6_7_8     | 36.6479 | -640.795 | 0.6581731 | 0 | 0.067960899  | 0            |
| cov3_5_6_7_8_11    | 36.7156 | -640.828 | 0.6569111 | 0 | 0            | 0            |
| cov1_3_6_7_8_11    | 36.7592 | -640.85  | 0.6573763 | 0 | 0.010168381  | 0            |
| cov1_3_5_6_7_11    | 36.7878 | -640.865 | 0.6576248 | 0 | 0.061750717  | 0            |
| cov1_2_4_5_6_11    | 36.795  | -640.868 | 0.6562247 | 0 | 0.13466571   | -0.009264955 |
| cov1_2_5_6_9_11    | 36.875  | -640.908 | 0.6555754 | 0 | -0.063823083 | 0.1039522    |
| cov1_3_5_6_8_11    | 36.8761 | -640.909 | 0.6575337 | 0 | 0.067644314  | 0            |
| cov1_2_5_6_10_11   | 36.891  | -640.916 | 0.6563897 | 0 | -0.063864725 | 0.1032598    |
| cov1_2_6_9_10_11   | 36.8954 | -640.918 | 0.6563234 | 0 | -0.042304072 | 0.10487754   |
| cov2_5_6_9_10_11   | 36.9515 | -640.946 | 0.6575457 | 0 | 0            | 0.092840215  |
| cov1_2_5_9_10_11   | 36.9652 | -640.953 | 0.6559434 | 0 | -0.028779844 | 0.10642423   |
| cov1_3_5_7_8_11    | 36.9709 | -640.956 | 0.6577049 | 0 | 0.13414326   | 0            |
| cov1_2_5_6_9_10    | 36.9934 | -640.967 | 0.6544669 | 0 | -0.084078512 | 0.10055635   |
| cov1_2_3_4_6_11    | 37.558  | -641.25  | 0.6508712 | 0 | -0.047949178 | 0.11977487   |
| cov1_5_6_9_10_11   | 37.6947 | -641.318 | 0.6597816 | 0 | -0.001622268 | 0            |
| cov2_4_5_6_7_8_9   | 40.7749 | -639.253 | 0.654266  | 0 | 0            | 0.022139807  |
| cov3_4_5_6_7_8_9   | 40.7849 | -639.258 | 0.6541662 | 0 | 0            | 0            |
| cov2_4_5_6_7_8_10  | 40.7865 | -639.259 | 0.6550851 | 0 | 0            | 0.021488912  |
| cov3_4_5_6_7_8_10  | 40.7925 | -639.262 | 0.6549846 | 0 | 0            | 0            |
| cov4_5_6_7_8_9_11  | 40.7925 | -639.262 | 0.6542326 | 0 | 0            | 0            |
| cov4_5_6_7_8_9_10  | 40.7927 | -639.262 | 0.6549592 | 0 | 0            | 0            |
| cov1_4_5_6_7_8_9   | 40.801  | -639.266 | 0.6547728 | 0 | 0.011711678  | 0            |
| cov4_5_6_7_8_10_11 | 40.802  | -639.267 | 0.6550477 | 0 | 0            | 0            |
| cov1_4_5_6_7_8_10  | 40.8112 | -639.272 | 0.6555782 | 0 | 0.011144747  | 0            |
| cov2_4_5_7_8_9_11  | 40.8113 | -639.272 | 0.6532376 | 0 | 0            | 0.029407465  |
| cov2_3_4_5_7_8_9   | 40.8125 | -639.272 | 0.6529572 | 0 | 0            | 0.041465769  |
| cov2_4_5_7_8_9_10  | 40.8176 | -639.275 | 0.6539101 | 0 | 0            | 0.033878611  |
| cov1_2_4_5_7_8_9   | 40.8208 | -639.276 | 0.6540555 | 0 | 0.018206116  | 0.025873568  |
| cov1_3_4_5_7_8_9   | 40.8216 | -639.277 | 0.6544115 | 0 | 0.057579038  | 0            |
| cov2_4_5_7_8_10_11 | 40.8243 | -639.278 | 0.6540718 | 0 | 0            | 0.02890478   |
| cov2_3_4_5_7_8_10  | 40.8254 | -639.279 | 0.6538111 | 0 | 0            | 0.041282923  |

|                    |         |          |           |   |              |   |             |
|--------------------|---------|----------|-----------|---|--------------|---|-------------|
| cov1_3_4_5_7_8_10  | 40.8313 | -639.282 | 0.6552159 | 0 | 0.058357491  | 0 | 0           |
| cov1_2_4_5_7_8_10  | 40.8344 | -639.283 | 0.6548997 | 0 | 0.01883253   | 0 | 0.025248403 |
| cov1_4_5_7_8_9_11  | 40.8357 | -639.284 | 0.6542162 | 0 | 0.031056089  | 0 | 0           |
| cov1_4_5_7_8_9_10  | 40.8386 | -639.285 | 0.6550823 | 0 | 0.038851012  | 0 | 0           |
| cov1_4_5_7_8_10_11 | 40.8472 | -639.29  | 0.6550273 | 0 | 0.030818826  | 0 | 0           |
| cov4_5_7_8_9_10_11 | 40.8536 | -639.293 | 0.6535997 | 0 | 0            | 0 | 0           |
| cov3_4_5_7_8_9_11  | 40.865  | -639.298 | 0.6528987 | 0 | 0            | 0 | 0           |
| cov3_4_5_7_8_10_11 | 40.875  | -639.303 | 0.6537516 | 0 | 0            | 0 | 0           |
| cov2_3_4_5_6_7_9   | 40.8912 | -639.312 | 0.6534238 | 0 | 0            | 0 | 0.030235744 |
| cov2_3_4_5_6_7_10  | 40.9003 | -639.316 | 0.6542111 | 0 | 0            | 0 | 0.029826416 |
| cov3_4_5_7_8_9_10  | 40.9011 | -639.317 | 0.6540484 | 0 | 0            | 0 | 0           |
| cov2_4_5_6_7_9_10  | 40.9142 | -639.323 | 0.6545214 | 0 | 0            | 0 | 0.022529908 |
| cov2_4_5_6_7_9_11  | 40.9178 | -639.325 | 0.6538649 | 0 | 0            | 0 | 0.020863153 |
| cov1_2_4_5_6_7_9   | 40.9234 | -639.328 | 0.6539616 | 0 | -0.007381048 | 0 | 0.025517419 |
| cov1_3_4_5_6_7_9   | 40.9236 | -639.328 | 0.654325  | 0 | 0.030062541  | 0 | 0           |
| cov3_4_5_6_7_9_11  | 40.9237 | -639.328 | 0.6535769 | 0 | 0            | 0 | 0           |
| cov3_4_5_6_7_9_10  | 40.9284 | -639.33  | 0.6544652 | 0 | 0            | 0 | 0           |
| cov2_4_5_6_7_10_11 | 40.9289 | -639.33  | 0.6546817 | 0 | 0            | 0 | 0.020168807 |
| cov3_4_5_6_7_10_11 | 40.9307 | -639.331 | 0.6543609 | 0 | 0            | 0 | 0           |
| cov1_3_4_5_6_7_10  | 40.9312 | -639.332 | 0.6551138 | 0 | 0.030128557  | 0 | 0           |
| cov4_5_6_7_9_10_11 | 40.9313 | -639.332 | 0.6544304 | 0 | 0            | 0 | 0           |
| cov2_3_4_5_7_9_11  | 40.9348 | -639.333 | 0.6524631 | 0 | 0            | 0 | 0.03600828  |
| cov1_2_3_4_5_7_9   | 40.9349 | -639.333 | 0.6535528 | 0 | 0.033935134  | 0 | 0.028281218 |
| cov1_2_4_5_6_7_10  | 40.9349 | -639.333 | 0.6547934 | 0 | -0.007371028 | 0 | 0.024882296 |
| cov1_4_5_6_7_9_10  | 40.9406 | -639.336 | 0.6549938 | 0 | 0.012633994  | 0 | 0           |
| cov1_4_5_6_7_9_11  | 40.9418 | -639.337 | 0.6542216 | 0 | 0.007517269  | 0 | 0           |
| cov2_4_5_7_9_10_11 | 40.9427 | -639.337 | 0.6535089 | 0 | 0            | 0 | 0.0286782   |
| cov2_3_4_5_7_9_10  | 40.9457 | -639.339 | 0.6532713 | 0 | 0            | 0 | 0.040345295 |
| cov1_2_3_4_5_7_10  | 40.946  | -639.339 | 0.654393  | 0 | 0.035050986  | 0 | 0.02775287  |
| cov2_3_4_5_7_10_11 | 40.946  | -639.339 | 0.6532684 | 0 | 0            | 0 | 0.035730087 |
| cov1_4_5_6_7_10_11 | 40.9514 | -639.342 | 0.6550114 | 0 | 0.006746454  | 0 | 0           |
| cov2_3_4_5_6_8_9   | 40.9514 | -639.342 | 0.6532647 | 0 | 0            | 0 | 0.031198953 |
| cov1_2_4_5_7_9_11  | 40.9516 | -639.342 | 0.6534656 | 0 | 0.010285449  | 0 | 0.025157675 |
| cov1_2_4_5_7_9_10  | 40.9534 | -639.343 | 0.6542802 | 0 | 0.017031576  | 0 | 0.025769427 |
| cov1_3_4_5_7_9_11  | 40.9542 | -639.343 | 0.6537657 | 0 | 0.047083102  | 0 | 0           |
| cov1_3_4_5_7_9_10  | 40.9571 | -639.344 | 0.6546667 | 0 | 0.055326826  | 0 | 0           |
| cov2_3_4_5_6_8_10  | 40.96   | -639.346 | 0.6540819 | 0 | 0            | 0 | 0.030800174 |
| cov1_3_4_5_7_10_11 | 40.9631 | -639.348 | 0.6545613 | 0 | 0.047516365  | 0 | 0           |
| cov1_2_4_5_7_10_11 | 40.9643 | -639.348 | 0.6542939 | 0 | 0.010634742  | 0 | 0.024503751 |
| cov1_2_4_6_7_8_9   | 40.9656 | -639.349 | 0.6529338 | 0 | -0.080856313 | 0 | 0.055392562 |
| cov1_4_5_7_9_10_11 | 40.9675 | -639.35  | 0.654432  | 0 | 0.029509747  | 0 | 0           |
| cov1_2_4_6_7_8_10  | 40.9703 | -639.351 | 0.6538812 | 0 | -0.079651475 | 0 | 0.054065029 |
| cov1_3_4_5_6_8_9   | 40.9807 | -639.356 | 0.6542246 | 0 | 0.034787566  | 0 | 0           |
| cov3_4_5_6_8_9_11  | 40.9877 | -639.36  | 0.653421  | 0 | 0            | 0 | 0           |
| cov1_3_4_5_6_8_10  | 40.9878 | -639.36  | 0.6550168 | 0 | 0.034840861  | 0 | 0           |
| cov2_4_5_6_8_9_10  | 40.9878 | -639.36  | 0.6544166 | 0 | 0            | 0 | 0.022069065 |
| cov3_4_5_6_8_9_10  | 40.9913 | -639.362 | 0.6543281 | 0 | 0            | 0 | 0           |

|                    |         |          |           |   |              |   |             |
|--------------------|---------|----------|-----------|---|--------------|---|-------------|
| cov1_2_3_4_5_8_9   | 40.9919 | -639.362 | 0.6533833 | 0 | 0.03887017   | 0 | 0.027781974 |
| cov2_4_5_6_8_9_11  | 40.9924 | -639.362 | 0.6538368 | 0 | 0            | 0 | 0.020683909 |
| cov3_4_5_7_9_10_11 | 40.9939 | -639.363 | 0.6532373 | 0 | 0            | 0 | 0           |
| cov3_4_5_6_8_10_11 | 40.9941 | -639.363 | 0.6542284 | 0 | 0            | 0 | 0           |
| cov1_2_4_7_8_9_10  | 40.9971 | -639.364 | 0.6533946 | 0 | -0.05286404  | 0 | 0.055131428 |
| cov1_2_4_5_6_8_9   | 40.9975 | -639.365 | 0.6539588 | 0 | -0.005252493 | 0 | 0.024448101 |
| cov2_3_4_5_8_9_11  | 40.9991 | -639.365 | 0.6522763 | 0 | 0            | 0 | 0.037264424 |
| cov1_2_3_4_5_8_10  | 41.0024 | -639.367 | 0.6543003 | 0 | 0.039693593  | 0 | 0.027225154 |
| cov1_2_4_7_8_9_11  | 41.0029 | -639.367 | 0.6524368 | 0 | -0.060858109 | 0 | 0.055266781 |
| cov2_4_5_6_8_10_11 | 41.0035 | -639.368 | 0.6546449 | 0 | 0            | 0 | 0.019986434 |
| cov4_5_6_8_9_10_11 | 41.0054 | -639.369 | 0.6544021 | 0 | 0            | 0 | 0           |
| cov1_2_4_7_8_10_11 | 41.0087 | -639.37  | 0.653393  | 0 | -0.059355845 | 0 | 0.053844228 |
| cov1_2_4_5_6_8_10  | 41.009  | -639.37  | 0.6547817 | 0 | -0.005271764 | 0 | 0.023829511 |
| cov2_3_4_5_8_9_10  | 41.0091 | -639.371 | 0.6531047 | 0 | 0            | 0 | 0.041547215 |
| cov2_3_4_5_8_10_11 | 41.0099 | -639.371 | 0.6530997 | 0 | 0            | 0 | 0.03698376  |
| cov1_3_4_5_8_9_11  | 41.0118 | -639.372 | 0.6536966 | 0 | 0.05186543   | 0 | 0           |
| cov1_4_5_6_8_9_10  | 41.0124 | -639.372 | 0.6549622 | 0 | 0.013849682  | 0 | 0           |
| cov1_3_4_5_8_9_10  | 41.0125 | -639.372 | 0.6545676 | 0 | 0.059487978  | 0 | 0           |
| cov1_2_3_4_7_8_9   | 41.0148 | -639.373 | 0.6529916 | 0 | -0.05350736  | 0 | 0.055516921 |
| cov1_4_5_6_8_9_11  | 41.0152 | -639.374 | 0.6542254 | 0 | 0.009304763  | 0 | 0           |
| cov2_4_5_8_9_10_11 | 41.0166 | -639.374 | 0.6534822 | 0 | 0            | 0 | 0.028436045 |
| cov1_3_4_5_8_10_11 | 41.0203 | -639.376 | 0.6544967 | 0 | 0.052275485  | 0 | 0           |
| cov1_2_3_4_7_8_10  | 41.0218 | -639.377 | 0.6539238 | 0 | -0.051501603 | 0 | 0.054629885 |
| cov1_2_4_5_8_9_10  | 41.0247 | -639.378 | 0.6542804 | 0 | 0.018185073  | 0 | 0.024729492 |
| cov1_2_4_5_8_9_11  | 41.0248 | -639.378 | 0.6535006 | 0 | 0.012083609  | 0 | 0.024173746 |
| cov1_4_5_6_8_10_11 | 41.025  | -639.378 | 0.6550175 | 0 | 0.008542284  | 0 | 0           |
| cov1_2_4_5_8_10_11 | 41.0375 | -639.385 | 0.6543275 | 0 | 0.012433104  | 0 | 0.023520855 |
| cov1_4_5_8_9_10_11 | 41.0386 | -639.385 | 0.654447  | 0 | 0.030498683  | 0 | 0           |
| cov3_4_5_8_9_10_11 | 41.0629 | -639.397 | 0.6530737 | 0 | 0            | 0 | 0           |
| cov1_2_4_6_7_9_10  | 41.0961 | -639.414 | 0.6532867 | 0 | -0.078311894 | 0 | 0.054450381 |
| cov1_2_4_6_7_9_11  | 41.1055 | -639.419 | 0.6524184 | 0 | -0.083915614 | 0 | 0.054758017 |
| cov1_4_6_7_8_9_10  | 41.1079 | -639.42  | 0.6547037 | 0 | -0.057043872 | 0 | 0           |
| cov1_2_4_6_7_10_11 | 41.1096 | -639.421 | 0.6533641 | 0 | -0.082889515 | 0 | 0.053391611 |
| cov1_2_3_4_6_7_9   | 41.1136 | -639.423 | 0.6528851 | 0 | -0.078931473 | 0 | 0.054776374 |
| cov1_4_6_7_8_10_11 | 41.1155 | -639.424 | 0.6546353 | 0 | -0.063348768 | 0 | 0           |
| cov1_3_4_6_7_8_10  | 41.1174 | -639.425 | 0.6553969 | 0 | -0.059148654 | 0 | 0           |
| cov1_3_4_6_7_8_9   | 41.1177 | -639.425 | 0.6544926 | 0 | -0.06011478  | 0 | 0           |
| cov1_2_3_4_6_7_10  | 41.1185 | -639.425 | 0.6537967 | 0 | -0.077621212 | 0 | 0.053900179 |
| cov1_4_6_7_8_9_11  | 41.1198 | -639.426 | 0.6536966 | 0 | -0.06375357  | 0 | 0           |
| cov1_2_4_7_9_10_11 | 41.1253 | -639.429 | 0.6527833 | 0 | -0.060664054 | 0 | 0.054205209 |
| cov1_2_3_4_7_9_10  | 41.138  | -639.435 | 0.653357  | 0 | -0.053180634 | 0 | 0.05429994  |
| cov1_4_7_8_9_10_11 | 41.1429 | -639.437 | 0.6540554 | 0 | -0.037841946 | 0 | 0           |
| cov1_2_3_4_7_9_11  | 41.1431 | -639.438 | 0.652421  | 0 | -0.061355357 | 0 | 0.054151696 |
| cov1_3_4_7_8_9_10  | 41.1463 | -639.439 | 0.6549536 | 0 | -0.032020955 | 0 | 0           |
| cov1_2_3_4_7_10_11 | 41.1492 | -639.441 | 0.6533306 | 0 | -0.059643826 | 0 | 0.053230803 |
| cov1_3_4_7_8_9_11  | 41.1509 | -639.441 | 0.6539003 | 0 | -0.041692415 | 0 | 0           |
| cov1_3_4_7_8_10_11 | 41.1518 | -639.442 | 0.6548048 | 0 | -0.040344416 | 0 | 0           |

|                    |         |          |           |   |              |   |             |
|--------------------|---------|----------|-----------|---|--------------|---|-------------|
| cov2_4_6_7_8_9_10  | 41.1665 | -639.449 | 0.6554891 | 0 | 0            | 0 | 0.032838119 |
| cov1_2_4_6_8_9_10  | 41.1766 | -639.454 | 0.6532598 | 0 | -0.077321876 | 0 | 0.053878842 |
| cov2_4_7_8_9_10_11 | 41.1791 | -639.456 | 0.6563056 | 0 | 0            | 0 | 0.029202696 |
| cov2_4_6_7_8_10_11 | 41.182  | -639.457 | 0.6560633 | 0 | 0            | 0 | 0.034025022 |
| cov2_4_6_7_8_9_11  | 41.1831 | -639.457 | 0.655195  | 0 | 0            | 0 | 0.0351731   |
| cov2_3_4_6_7_8_10  | 41.1841 | -639.458 | 0.655796  | 0 | 0            | 0 | 0.034198668 |
| cov2_3_4_6_7_8_9   | 41.1864 | -639.459 | 0.6549473 | 0 | 0            | 0 | 0.034787512 |
| cov1_2_4_6_8_9_11  | 41.1877 | -639.46  | 0.6524212 | 0 | -0.082396655 | 0 | 0.054245257 |
| cov2_3_4_7_8_9_10  | 41.1916 | -639.462 | 0.6560169 | 0 | 0            | 0 | 0.026650329 |
| cov1_2_4_6_8_10_11 | 41.1917 | -639.462 | 0.6533627 | 0 | -0.081406371 | 0 | 0.052891744 |
| cov2_3_4_7_8_10_11 | 41.194  | -639.463 | 0.6564757 | 0 | 0            | 0 | 0.031546011 |
| cov1_2_3_4_6_8_9   | 41.1944 | -639.463 | 0.6527525 | 0 | -0.077623322 | 0 | 0.055575697 |
| cov2_3_4_7_8_9_11  | 41.1981 | -639.465 | 0.655708  | 0 | 0            | 0 | 0.031902541 |
| cov1_2_3_4_6_8_10  | 41.1985 | -639.465 | 0.6536675 | 0 | -0.076316481 | 0 | 0.05468691  |
| cov1_2_4_8_9_10_11 | 41.2048 | -639.468 | 0.6527972 | 0 | -0.060010217 | 0 | 0.053700182 |
| cov1_2_3_4_8_9_10  | 41.2158 | -639.474 | 0.6532347 | 0 | -0.052585319 | 0 | 0.055050895 |
| cov1_2_3_4_8_9_11  | 41.2234 | -639.478 | 0.6523148 | 0 | -0.060200005 | 0 | 0.055036652 |
| cov1_2_3_4_8_10_11 | 41.2287 | -639.48  | 0.6532341 | 0 | -0.058478913 | 0 | 0.054040876 |
| cov3_4_6_7_8_9_10  | 41.2296 | -639.481 | 0.6560683 | 0 | 0            | 0 | 0           |
| cov4_6_7_8_9_10_11 | 41.2324 | -639.482 | 0.6559695 | 0 | 0            | 0 | 0           |
| cov3_4_7_8_9_10_11 | 41.233  | -639.482 | 0.6563963 | 0 | 0            | 0 | 0           |
| cov1_3_4_6_7_9_10  | 41.2419 | -639.487 | 0.6548637 | 0 | -0.058114118 | 0 | 0           |
| cov1_4_6_7_9_10_11 | 41.2432 | -639.488 | 0.6540581 | 0 | -0.061911661 | 0 | 0           |
| cov3_4_6_7_8_10_11 | 41.2482 | -639.49  | 0.6565388 | 0 | 0            | 0 | 0           |
| cov1_3_4_6_7_10_11 | 41.2501 | -639.491 | 0.6547924 | 0 | -0.06425046  | 0 | 0           |
| cov1_3_4_6_7_9_11  | 41.2509 | -639.491 | 0.6539056 | 0 | -0.065022678 | 0 | 0           |
| cov3_4_6_7_8_9_11  | 41.2524 | -639.492 | 0.65569   | 0 | 0            | 0 | 0           |
| cov1_3_4_7_9_10_11 | 41.2668 | -639.499 | 0.6542636 | 0 | -0.042033134 | 0 | 0           |
| cov2_4_6_7_9_10_11 | 41.3009 | -639.516 | 0.6554803 | 0 | 0            | 0 | 0.034629803 |
| cov2_3_4_6_7_9_10  | 41.3033 | -639.518 | 0.6552802 | 0 | 0            | 0 | 0.034184636 |
| cov2_3_4_7_9_10_11 | 41.3192 | -639.526 | 0.6560711 | 0 | 0            | 0 | 0.030699358 |
| cov2_3_4_6_7_10_11 | 41.3195 | -639.526 | 0.655833  | 0 | 0            | 0 | 0.035263837 |
| cov2_3_4_6_7_9_11  | 41.3208 | -639.526 | 0.654958  | 0 | 0            | 0 | 0.035929715 |
| cov1_4_6_8_9_10_11 | 41.3224 | -639.527 | 0.6540647 | 0 | -0.060662588 | 0 | 0           |
| cov1_3_4_6_8_9_10  | 41.3262 | -639.529 | 0.6547488 | 0 | -0.056452964 | 0 | 0           |
| cov1_3_4_6_8_10_11 | 41.3361 | -639.534 | 0.65471   | 0 | -0.062103326 | 0 | 0           |
| cov1_3_4_6_8_9_11  | 41.3378 | -639.535 | 0.6538257 | 0 | -0.062856249 | 0 | 0           |
| cov1_2_3_4_5_6_9   | 41.346  | -639.539 | 0.6527814 | 0 | 0.07023956   | 0 | 0.020930906 |
| cov1_2_3_4_5_6_10  | 41.3476 | -639.54  | 0.6535999 | 0 | 0.070119606  | 0 | 0.020435523 |
| cov1_3_4_5_6_9_10  | 41.3483 | -639.54  | 0.6537505 | 0 | 0.084502939  | 0 | 0           |
| cov1_3_4_8_9_10_11 | 41.3509 | -639.541 | 0.6541839 | 0 | -0.040545971 | 0 | 0           |
| cov1_3_4_5_6_9_11  | 41.3649 | -639.548 | 0.6534003 | 0 | 0.086062278  | 0 | 0           |
| cov1_2_3_6_7_8_9   | 41.3652 | -639.549 | 0.6530166 | 0 | -0.068000787 | 0 | 0.10912563  |
| cov1_3_4_5_6_10_11 | 41.3657 | -639.549 | 0.6541703 | 0 | 0.085341226  | 0 | 0           |
| cov3_4_6_7_9_10_11 | 41.3677 | -639.55  | 0.6560265 | 0 | 0            | 0 | 0           |
| cov1_2_3_6_7_8_10  | 41.3728 | -639.552 | 0.6538378 | 0 | -0.066772904 | 0 | 0.10857245  |
| cov2_4_6_8_9_10_11 | 41.3756 | -639.554 | 0.6554446 | 0 | 0            | 0 | 0.03447675  |



|                    |         |          |           |   |              |   |             |
|--------------------|---------|----------|-----------|---|--------------|---|-------------|
| cov2_3_4_6_8_9_10  | 41.3768 | -639.554 | 0.6551423 | 0 | 0            | 0 | 0.035113945 |
| cov1_2_3_4_5_9_10  | 41.3877 | -639.56  | 0.6531482 | 0 | 0.099128116  | 0 | 0.021005379 |
| cov2_3_4_8_9_10_11 | 41.3915 | -639.562 | 0.6559242 | 0 | 0            | 0 | 0.031927959 |
| cov2_3_4_6_8_10_11 | 41.3923 | -639.562 | 0.6556954 | 0 | 0            | 0 | 0.036412455 |
| cov2_3_4_6_8_9_11  | 41.3942 | -639.563 | 0.6548655 | 0 | 0            | 0 | 0.037110971 |
| cov1_2_3_4_5_9_11  | 41.4039 | -639.568 | 0.6527099 | 0 | 0.099792431  | 0 | 0.021206042 |
| cov1_3_4_5_9_10_11 | 41.4064 | -639.569 | 0.6536123 | 0 | 0.11371894   | 0 | 0           |
| cov1_2_3_4_5_10_11 | 41.4076 | -639.57  | 0.6535269 | 0 | 0.10002408   | 0 | 0.020667977 |
| cov1_2_5_6_7_8_9   | 41.4129 | -639.572 | 0.6534343 | 0 | -0.094184244 | 0 | 0.10638956  |
| cov2_3_4_5_6_9_10  | 41.4161 | -639.574 | 0.651949  | 0 | 0            | 0 | 0.04205998  |
| cov1_2_5_6_7_8_10  | 41.4235 | -639.578 | 0.6542724 | 0 | -0.094177162 | 0 | 0.10572253  |
| cov2_3_4_5_6_9_11  | 41.4336 | -639.583 | 0.6513627 | 0 | 0            | 0 | 0.041911519 |
| cov2_3_4_5_6_10_11 | 41.4345 | -639.583 | 0.6522296 | 0 | 0            | 0 | 0.041237648 |
| cov1_2_3_7_8_9_11  | 41.4355 | -639.584 | 0.6526334 | 0 | -0.03949596  | 0 | 0.11105713  |
| cov1_2_3_7_8_9_10  | 41.4364 | -639.584 | 0.6535248 | 0 | -0.030984588 | 0 | 0.11173397  |
| cov1_2_3_5_7_8_9   | 41.4447 | -639.588 | 0.6530869 | 0 | -0.042137981 | 0 | 0.1112151   |
| cov3_4_6_8_9_10_11 | 41.445  | -639.588 | 0.6558761 | 0 | 0            | 0 | 0           |
| cov1_2_3_7_8_10_11 | 41.4453 | -639.589 | 0.6534604 | 0 | -0.037820337 | 0 | 0.11050289  |
| cov1_2_6_7_8_9_10  | 41.448  | -639.59  | 0.6542965 | 0 | -0.067857817 | 0 | 0.10757534  |
| cov1_2_6_7_8_9_11  | 41.4489 | -639.59  | 0.6536373 | 0 | -0.072838449 | 0 | 0.10726226  |
| cov1_2_3_5_7_8_10  | 41.4548 | -639.593 | 0.6539414 | 0 | -0.040916274 | 0 | 0.11062732  |
| cov1_2_6_7_8_10_11 | 41.4627 | -639.597 | 0.6544186 | 0 | -0.071857459 | 0 | 0.10670408  |
| cov2_3_5_6_7_8_9   | 41.4684 | -639.6   | 0.6542429 | 0 | 0            | 0 | 0.097975342 |
| cov2_3_5_6_7_8_10  | 41.4741 | -639.603 | 0.654985  | 0 | 0            | 0 | 0.097570242 |
| cov1_2_5_7_8_9_11  | 41.4744 | -639.603 | 0.6530168 | 0 | -0.069536517 | 0 | 0.10809512  |
| cov1_2_5_7_8_9_10  | 41.4749 | -639.603 | 0.6538769 | 0 | -0.062746706 | 0 | 0.10863107  |
| cov2_3_5_7_8_9_10  | 41.4769 | -639.604 | 0.6543665 | 0 | 0            | 0 | 0.1016676   |
| cov1_2_5_7_8_10_11 | 41.4867 | -639.609 | 0.6538672 | 0 | -0.069207237 | 0 | 0.10741369  |
| cov2_3_5_7_8_9_11  | 41.4874 | -639.61  | 0.6538718 | 0 | 0            | 0 | 0.10132632  |
| cov2_3_5_7_8_10_11 | 41.4946 | -639.613 | 0.6546278 | 0 | 0            | 0 | 0.10090893  |
| cov2_3_7_8_9_10_11 | 41.5072 | -639.62  | 0.6551571 | 0 | 0            | 0 | 0.089196004 |
| cov3_4_5_6_9_10_11 | 41.5073 | -639.62  | 0.652407  | 0 | 0            | 0 | 0           |
| cov2_3_6_7_8_9_10  | 41.5085 | -639.62  | 0.6551196 | 0 | 0            | 0 | 0.087419768 |
| cov1_2_3_6_7_9_10  | 41.509  | -639.62  | 0.6533209 | 0 | -0.065317058 | 0 | 0.10891062  |
| cov1_2_3_6_7_9_11  | 41.5134 | -639.623 | 0.652565  | 0 | -0.070868464 | 0 | 0.10854238  |
| cov1_2_7_8_9_10_11 | 41.516  | -639.624 | 0.6539508 | 0 | -0.039722419 | 0 | 0.10956685  |
| cov1_2_3_5_6_7_9   | 41.5187 | -639.625 | 0.6528988 | 0 | -0.073891029 | 0 | 0.10859079  |
| cov1_2_3_6_7_10_11 | 41.5208 | -639.626 | 0.6533605 | 0 | -0.069820019 | 0 | 0.10796957  |
| cov2_3_6_7_8_9_11  | 41.522  | -639.627 | 0.6548585 | 0 | 0            | 0 | 0.088544463 |
| cov2_3_6_7_8_10_11 | 41.5244 | -639.628 | 0.6556147 | 0 | 0            | 0 | 0.088263294 |
| cov1_2_3_5_6_7_10  | 41.5262 | -639.629 | 0.6537259 | 0 | -0.073299795 | 0 | 0.10798283  |
| cov1_2_5_6_7_9_10  | 41.5496 | -639.641 | 0.6536876 | 0 | -0.093171517 | 0 | 0.10615054  |
| cov1_2_5_6_7_9_11  | 41.5536 | -639.643 | 0.6529578 | 0 | -0.097311985 | 0 | 0.10588963  |
| cov1_2_5_6_7_10_11 | 41.5636 | -639.648 | 0.6537925 | 0 | -0.09749799  | 0 | 0.10519285  |
| cov1_2_3_7_9_10_11 | 41.5692 | -639.651 | 0.6529196 | 0 | -0.039182999 | 0 | 0.11064245  |
| cov1_2_3_5_7_9_11  | 41.5767 | -639.654 | 0.6524882 | 0 | -0.051414874 | 0 | 0.11005323  |
| cov1_2_3_5_7_9_10  | 41.5768 | -639.654 | 0.6533794 | 0 | -0.044155971 | 0 | 0.1106322   |

|                    |         |          |           |   |              |   |             |
|--------------------|---------|----------|-----------|---|--------------|---|-------------|
| cov1_2_3_6_8_9_10  | 41.5786 | -639.655 | 0.6532083 | 0 | -0.064305486 | 0 | 0.10899048  |
| cov1_2_3_6_8_9_11  | 41.5851 | -639.658 | 0.6524711 | 0 | -0.069382855 | 0 | 0.10868846  |
| cov1_2_3_5_7_10_11 | 41.5858 | -639.659 | 0.6533149 | 0 | -0.050497066 | 0 | 0.10942206  |
| cov1_2_6_7_9_10_11 | 41.5896 | -639.661 | 0.6538339 | 0 | -0.07063949  | 0 | 0.10711171  |
| cov1_2_3_5_6_8_9   | 41.5908 | -639.661 | 0.652802  | 0 | -0.069272667 | 0 | 0.10894798  |
| cov1_2_3_6_8_10_11 | 41.5917 | -639.662 | 0.6532797 | 0 | -0.068336225 | 0 | 0.10811011  |
| cov1_2_3_5_6_8_10  | 41.5977 | -639.665 | 0.6536278 | 0 | -0.068705381 | 0 | 0.10833691  |
| cov1_2_5_7_9_10_11 | 41.6016 | -639.667 | 0.6532612 | 0 | -0.070789142 | 0 | 0.10765001  |
| cov2_5_6_7_8_9_10  | 41.6017 | -639.667 | 0.6560349 | 0 | 0            | 0 | 0.088445499 |
| cov2_5_7_8_9_10_11 | 41.6017 | -639.667 | 0.6560147 | 0 | 0            | 0 | 0.090065811 |
| cov2_6_7_8_9_10_11 | 41.6035 | -639.668 | 0.6562038 | 0 | 0            | 0 | 0.087165633 |
| cov2_5_6_7_8_9_11  | 41.6089 | -639.67  | 0.6558139 | 0 | 0            | 0 | 0.089469885 |
| cov2_3_5_6_7_9_10  | 41.61   | -639.671 | 0.6545283 | 0 | 0            | 0 | 0.097676637 |
| cov2_3_4_5_9_10_11 | 41.6142 | -639.673 | 0.6501615 | 0 | 0            | 0 | 0.059699243 |
| cov2_5_6_7_8_10_11 | 41.6196 | -639.676 | 0.656546  | 0 | 0            | 0 | 0.088845312 |
| cov2_3_5_6_7_9_11  | 41.6217 | -639.677 | 0.654114  | 0 | 0            | 0 | 0.09796352  |
| cov2_3_5_7_9_10_11 | 41.6237 | -639.678 | 0.6541845 | 0 | 0            | 0 | 0.10037731  |
| cov2_3_5_6_7_10_11 | 41.6275 | -639.68  | 0.6548522 | 0 | 0            | 0 | 0.097429697 |
| cov1_2_3_8_9_10_11 | 41.6377 | -639.685 | 0.6528582 | 0 | -0.038270602 | 0 | 0.11068843  |
| cov1_2_5_6_8_9_10  | 41.6404 | -639.686 | 0.6536685 | 0 | -0.091936691 | 0 | 0.10611841  |
| cov1_2_5_6_8_9_11  | 41.646  | -639.689 | 0.6529756 | 0 | -0.095541007 | 0 | 0.10592416  |
| cov1_2_3_5_8_9_10  | 41.6465 | -639.689 | 0.6532863 | 0 | -0.040164156 | 0 | 0.11093629  |
| cov1_2_3_5_8_9_11  | 41.6485 | -639.69  | 0.6524205 | 0 | -0.046850168 | 0 | 0.11043753  |
| cov2_3_6_7_9_10_11 | 41.654  | -639.693 | 0.6550913 | 0 | 0            | 0 | 0.08894748  |
| cov1_2_5_6_8_10_11 | 41.6561 | -639.694 | 0.6537914 | 0 | -0.095736608 | 0 | 0.10523303  |
| cov1_2_3_5_8_10_11 | 41.6572 | -639.695 | 0.6532552 | 0 | -0.045934974 | 0 | 0.10981528  |
| cov2_3_5_6_8_9_10  | 41.6697 | -639.701 | 0.6543401 | 0 | 0            | 0 | 0.098629462 |
| cov2_3_5_6_8_9_11  | 41.6818 | -639.707 | 0.6539569 | 0 | 0            | 0 | 0.098944997 |
| cov1_2_6_8_9_10_11 | 41.6819 | -639.707 | 0.6538589 | 0 | -0.068857644 | 0 | 0.10715923  |
| cov2_3_5_8_9_10_11 | 41.6852 | -639.709 | 0.6540177 | 0 | 0            | 0 | 0.10152758  |
| cov2_3_5_6_8_10_11 | 41.6872 | -639.71  | 0.6547029 | 0 | 0            | 0 | 0.09840574  |
| cov1_2_5_8_9_10_11 | 41.6905 | -639.711 | 0.6532825 | 0 | -0.069862369 | 0 | 0.10762328  |
| cov2_3_6_8_9_10_11 | 41.7188 | -639.725 | 0.6549723 | 0 | 0            | 0 | 0.089452704 |
| cov2_5_6_7_9_10_11 | 41.7414 | -639.737 | 0.65598   | 0 | 0            | 0 | 0.089388864 |
| cov2_5_6_8_9_10_11 | 41.8269 | -639.779 | 0.6559475 | 0 | 0            | 0 | 0.08969494  |
| cov1_2_4_5_6_7_8   | 42.0695 | -639.901 | 0.6541612 | 0 | 0.065997202  | 0 | 0.030274193 |
| cov1_2_3_4_6_9_10  | 42.0852 | -639.909 | 0.6512714 | 0 | -0.071061968 | 0 | 0.071901131 |
| cov1_3_4_5_6_7_8   | 42.0906 | -639.911 | 0.654842  | 0 | 0.1050301    | 0 | 0           |
| cov1_2_3_4_6_10_11 | 42.0985 | -639.915 | 0.6521088 | 0 | -0.065907369 | 0 | 0.072129485 |
| cov1_4_5_6_7_8_11  | 42.106  | -639.919 | 0.654804  | 0 | 0.087960446  | 0 | 0           |
| cov1_2_3_4_6_9_11  | 42.1136 | -639.923 | 0.6511183 | 0 | -0.06694308  | 0 | 0.073432547 |
| cov2_4_5_6_7_8_11  | 42.1409 | -639.936 | 0.6524846 | 0 | 0            | 0 | 0.051879707 |
| cov1_2_3_4_9_10_11 | 42.1424 | -639.937 | 0.6515891 | 0 | -0.036790566 | 0 | 0.07268446  |
| cov2_3_4_5_6_7_8   | 42.1522 | -639.942 | 0.6527269 | 0 | 0            | 0 | 0.056712504 |
| cov1_2_3_5_6_9_10  | 42.1538 | -639.943 | 0.6522592 | 0 | -0.013506161 | 0 | 0.11287686  |
| cov2_3_5_6_9_10_11 | 42.1552 | -639.944 | 0.6527133 | 0 | 0            | 0 | 0.11126004  |
| cov1_2_3_5_6_10_11 | 42.1697 | -639.951 | 0.652848  | 0 | -0.010956436 | 0 | 0.11288048  |

|                    |         |          |           |   |              |   |             |
|--------------------|---------|----------|-----------|---|--------------|---|-------------|
| cov1_2_3_5_6_9_11  | 42.1716 | -639.952 | 0.6520161 | 0 | -0.010746697 | 0 | 0.11360134  |
| cov1_2_3_4_5_6_7   | 42.1984 | -639.965 | 0.6537763 | 0 | 0.08015424   | 0 | 0.032346168 |
| cov2_3_4_6_9_10_11 | 42.215  | -639.973 | 0.6536748 | 0 | 0            | 0 | 0.057059843 |
| cov1_2_4_5_6_7_11  | 42.2154 | -639.974 | 0.6538248 | 0 | 0.065000938  | 0 | 0.030125315 |
| cov1_2_3_4_5_7_8   | 42.2258 | -639.979 | 0.6538059 | 0 | 0.13584688   | 0 | 0.033371318 |
| cov1_2_4_5_7_8_11  | 42.2338 | -639.983 | 0.6536622 | 0 | 0.11766393   | 0 | 0.031006171 |
| cov1_3_4_5_6_7_11  | 42.2397 | -639.986 | 0.654469  | 0 | 0.10186916   | 0 | 0           |
| cov1_2_3_5_9_10_11 | 42.2508 | -639.991 | 0.6523811 | 0 | 0.023618989  | 0 | 0.11585782  |
| cov3_6_7_8_9_10_11 | 42.2535 | -639.993 | 0.6574086 | 0 | 0            | 0 | 0           |
| cov3_5_6_7_8_10_11 | 42.2576 | -639.995 | 0.6579259 | 0 | 0            | 0 | 0           |
| cov3_5_6_7_8_9_10  | 42.258  | -639.995 | 0.6580224 | 0 | 0            | 0 | 0           |
| cov3_5_6_7_8_9_11  | 42.2608 | -639.996 | 0.6571739 | 0 | 0            | 0 | 0           |
| cov1_2_3_4_5_6_8   | 42.2625 | -639.997 | 0.6536916 | 0 | 0.085582386  | 0 | 0.031825662 |
| cov1_3_4_5_7_8_11  | 42.2636 | -639.998 | 0.6543021 | 0 | 0.15527494   | 0 | 0           |
| cov1_3_6_7_8_10_11 | 42.2697 | -640.001 | 0.6578119 | 0 | 0.002295057  | 0 | 0           |
| cov1_3_6_7_8_9_11  | 42.2716 | -640.002 | 0.6570593 | 0 | 0.001640763  | 0 | 0           |
| cov1_3_5_6_7_8_10  | 42.2722 | -640.002 | 0.6582759 | 0 | -0.011596793 | 0 | 0           |
| cov1_5_6_7_8_10_11 | 42.2722 | -640.002 | 0.6579723 | 0 | -0.034959805 | 0 | 0           |
| cov1_5_6_7_8_9_11  | 42.2731 | -640.003 | 0.6571689 | 0 | -0.03396444  | 0 | 0           |
| cov1_3_5_6_7_8_9   | 42.2746 | -640.003 | 0.6574901 | 0 | -0.011563964 | 0 | 0           |
| cov1_5_6_7_8_9_10  | 42.2759 | -640.004 | 0.6581898 | 0 | -0.026343591 | 0 | 0           |
| cov1_3_6_7_8_9_10  | 42.2762 | -640.004 | 0.6580852 | 0 | 0.011144011  | 0 | 0           |
| cov1_2_3_6_9_10_11 | 42.2806 | -640.006 | 0.6518862 | 0 | -0.058618466 | 0 | 0.10973052  |
| cov5_6_7_8_9_10_11 | 42.2832 | -640.008 | 0.658369  | 0 | 0            | 0 | 0           |
| cov2_3_4_5_6_7_11  | 42.2916 | -640.012 | 0.652191  | 0 | 0            | 0 | 0.054037453 |
| cov1_2_4_5_6_8_11  | 42.2927 | -640.012 | 0.6538467 | 0 | 0.067706669  | 0 | 0.029123415 |
| cov3_4_5_6_7_8_11  | 42.2984 | -640.015 | 0.6534642 | 0 | 0            | 0 | 0           |
| cov1_3_4_5_6_8_11  | 42.3033 | -640.018 | 0.6544027 | 0 | 0.10737409   | 0 | 0           |
| cov1_6_7_8_9_10_11 | 42.3317 | -640.032 | 0.6584087 | 0 | 0.001028109  | 0 | 0           |
| cov1_3_4_6_9_10_11 | 42.3427 | -640.037 | 0.6533164 | 0 | -0.039514943 | 0 | 0           |
| cov1_2_3_4_5_7_11  | 42.3555 | -640.044 | 0.6534315 | 0 | 0.12810072   | 0 | 0.032649854 |
| cov3_5_7_8_9_10_11 | 42.3574 | -640.045 | 0.6569338 | 0 | 0            | 0 | 0           |
| cov1_5_7_8_9_10_11 | 42.3661 | -640.049 | 0.6575477 | 0 | 0.00406218   | 0 | 0           |
| cov1_3_5_7_8_10_11 | 42.3703 | -640.051 | 0.6576719 | 0 | 0.018217798  | 0 | 0           |
| cov1_3_5_7_8_9_11  | 42.3713 | -640.052 | 0.6568743 | 0 | 0.017958901  | 0 | 0           |
| cov2_3_4_5_6_8_11  | 42.3722 | -640.052 | 0.6520247 | 0 | 0            | 0 | 0.055372257 |
| cov1_3_7_8_9_10_11 | 42.3813 | -640.057 | 0.6575105 | 0 | 0.046905694  | 0 | 0           |
| cov1_3_5_7_8_9_10  | 42.3857 | -640.059 | 0.6580924 | 0 | 0.030532115  | 0 | 0           |
| cov3_5_6_7_9_10_11 | 42.396  | -640.064 | 0.6574746 | 0 | 0            | 0 | 0           |
| cov1_3_5_6_7_10_11 | 42.4045 | -640.068 | 0.6575504 | 0 | -0.020475765 | 0 | 0           |
| cov1_5_6_7_9_10_11 | 42.4046 | -640.068 | 0.6574424 | 0 | -0.033703378 | 0 | 0           |
| cov1_3_5_6_7_9_11  | 42.4076 | -640.07  | 0.6567645 | 0 | -0.020242025 | 0 | 0           |
| cov1_3_5_6_7_9_10  | 42.4109 | -640.071 | 0.657821  | 0 | -0.012020515 | 0 | 0           |
| cov1_3_6_7_9_10_11 | 42.4118 | -640.072 | 0.6573724 | 0 | 0.003977046  | 0 | 0           |
| cov1_2_3_4_5_8_11  | 42.4181 | -640.075 | 0.6532676 | 0 | 0.13323845   | 0 | 0.032213572 |
| cov3_5_6_8_9_10_11 | 42.4723 | -640.102 | 0.6573002 | 0 | 0            | 0 | 0           |
| cov1_3_5_6_8_10_11 | 42.4844 | -640.108 | 0.6574624 | 0 | -0.014952337 | 0 | 0           |

|                      |         |          |           |   |              |   |              |
|----------------------|---------|----------|-----------|---|--------------|---|--------------|
| cov1_3_6_8_9_10_11   | 42.4851 | -640.109 | 0.6572692 | 0 | 0.005596293  | 0 | 0            |
| cov1_3_5_6_8_9_11    | 42.4881 | -640.11  | 0.656694  | 0 | -0.014702903 | 0 | 0            |
| cov1_3_5_6_8_9_10    | 42.4885 | -640.11  | 0.6577101 | 0 | -0.007026737 | 0 | 0            |
| cov1_3_5_7_9_10_11   | 42.4935 | -640.113 | 0.6571856 | 0 | 0.01516277   | 0 | 0            |
| cov1_5_6_8_9_10_11   | 42.4975 | -640.115 | 0.6574585 | 0 | -0.031915884 | 0 | 0            |
| cov1_3_5_8_9_10_11   | 42.5714 | -640.152 | 0.6571133 | 0 | 0.020059934  | 0 | 0            |
| cov2_3_4_5_7_8_11    | 42.582  | -640.157 | 0.6500023 | 0 | 0            | 0 | 0.083349913  |
| cov1_4_5_6_9_10_11   | 42.6164 | -640.174 | 0.6562902 | 0 | 0.041109732  | 0 | 0            |
| cov1_2_4_5_6_9_11    | 42.6171 | -640.175 | 0.6563424 | 0 | 0.052984136  | 0 | -0.013849548 |
| cov1_2_4_5_6_10_11   | 42.6332 | -640.183 | 0.6571426 | 0 | 0.052987299  | 0 | -0.014561527 |
| cov2_4_5_6_9_10_11   | 42.6549 | -640.193 | 0.6555412 | 0 | 0            | 0 | 0.001560903  |
| cov1_2_4_5_9_10_11   | 42.6567 | -640.194 | 0.6565437 | 0 | 0.078805759  | 0 | -0.013900145 |
| cov1_2_4_5_6_9_10    | 42.6733 | -640.203 | 0.6557162 | 0 | 0.040501211  | 0 | -0.018466098 |
| cov1_2_3_4_5_6_11    | 42.7389 | -640.235 | 0.6532847 | 0 | 0.15268841   | 0 | 0.02555701   |
| cov2_3_5_6_7_8_11    | 42.7613 | -640.247 | 0.6529159 | 0 | 0            | 0 | 0.11719362   |
| cov1_2_3_5_6_7_8     | 42.762  | -640.247 | 0.6529565 | 0 | -0.005503618 | 0 | 0.11866541   |
| cov1_2_5_6_7_8_11    | 42.7928 | -640.262 | 0.6530777 | 0 | -0.024172942 | 0 | 0.11651086   |
| cov1_2_3_4_6_7_8     | 42.8306 | -640.281 | 0.6527226 | 0 | -0.073257114 | 0 | 0.086536231  |
| cov1_2_4_6_7_8_11    | 42.9059 | -640.319 | 0.6518161 | 0 | -0.072410798 | 0 | 0.099027523  |
| cov1_2_3_5_6_7_11    | 42.9119 | -640.322 | 0.6526682 | 0 | -0.007666179 | 0 | 0.11830783   |
| cov1_2_3_6_7_8_11    | 42.9467 | -640.339 | 0.6524385 | 0 | -0.068650915 | 0 | 0.11451736   |
| cov1_2_3_4_6_7_11    | 42.9652 | -640.349 | 0.6524975 | 0 | -0.073755569 | 0 | 0.085676031  |
| cov1_2_3_5_6_8_11    | 42.9918 | -640.362 | 0.652605  | 0 | -0.002280608 | 0 | 0.11875967   |
| cov1_2_3_5_7_8_11    | 42.9959 | -640.364 | 0.6526438 | 0 | 0.049905444  | 0 | 0.12317403   |
| cov2_3_4_6_7_8_11    | 43.003  | -640.367 | 0.6547754 | 0 | 0            | 0 | 0.069617595  |
| cov1_2_3_4_7_8_11    | 43.0348 | -640.383 | 0.6524001 | 0 | -0.020919135 | 0 | 0.088312748  |
| cov1_2_3_4_6_8_11    | 43.0765 | -640.404 | 0.6523825 | 0 | -0.071483945 | 0 | 0.086859245  |
| cov1_3_5_6_9_10_11   | 43.1396 | -640.436 | 0.6565307 | 0 | 0.054905451  | 0 | 0            |
| cov1_2_4_6_9_10_11   | 43.1449 | -640.438 | 0.6549799 | 0 | -0.063029914 | 0 | 0.0325151    |
| cov1_3_4_6_7_8_11    | 43.2102 | -640.471 | 0.6552187 | 0 | -0.043201179 | 0 | 0            |
| cov1_3_5_6_7_8_11    | 43.8455 | -640.789 | 0.6577087 | 0 | 0.0615865    | 0 | 0            |
| cov1_2_5_6_9_10_11   | 44.0729 | -640.902 | 0.6559131 | 0 | -0.064780174 | 0 | 0.10357744   |
| cov2_3_4_5_6_7_8_9   | 47.9447 | -639.234 | 0.6535231 | 0 | 0            | 0 | 0.030070758  |
| cov2_3_4_5_6_7_8_10  | 47.9535 | -639.238 | 0.6543342 | 0 | 0            | 0 | 0.029675843  |
| cov2_4_5_6_7_8_9_10  | 47.9741 | -639.248 | 0.6546154 | 0 | 0            | 0 | 0.021550108  |
| cov1_3_4_5_6_7_8_9   | 47.977  | -639.25  | 0.6544133 | 0 | 0.029356235  | 0 | 0            |
| cov3_4_5_6_7_8_9_11  | 47.9773 | -639.25  | 0.6536673 | 0 | 0            | 0 | 0            |
| cov2_4_5_6_7_8_9_11  | 47.9785 | -639.251 | 0.6540346 | 0 | 0            | 0 | 0.020128106  |
| cov3_4_5_6_7_8_9_10  | 47.9809 | -639.252 | 0.6545362 | 0 | 0            | 0 | 0            |
| cov1_2_4_5_6_7_8_9   | 47.9827 | -639.253 | 0.6540794 | 0 | -0.009203976 | 0 | 0.025271551  |
| cov3_4_5_6_7_8_10_11 | 47.9841 | -639.253 | 0.6544696 | 0 | 0            | 0 | 0            |
| cov1_3_4_5_6_7_8_10  | 47.9845 | -639.254 | 0.6552081 | 0 | 0.0293803    | 0 | 0            |
| cov2_4_5_6_7_8_10_11 | 47.9896 | -639.256 | 0.6548409 | 0 | 0            | 0 | 0.019434522  |
| cov4_5_6_7_8_9_10_11 | 47.9902 | -639.256 | 0.6545955 | 0 | 0            | 0 | 0            |
| cov1_2_4_5_6_7_8_10  | 47.9943 | -639.258 | 0.6549157 | 0 | -0.009228816 | 0 | 0.024629448  |
| cov1_2_3_4_5_7_8_9   | 47.9965 | -639.26  | 0.6536379 | 0 | 0.035382756  | 0 | 0.028297053  |
| cov2_3_4_5_7_8_9_11  | 47.9981 | -639.26  | 0.6524944 | 0 | 0            | 0 | 0.036499483  |

|                      |         |          |           |   |              |   |             |
|----------------------|---------|----------|-----------|---|--------------|---|-------------|
| cov1_4_5_6_7_8_9_10  | 47.9993 | -639.261 | 0.6551056 | 0 | 0.010580902  | 0 | 0           |
| cov1_4_5_6_7_8_9_11  | 48.0011 | -639.262 | 0.6543459 | 0 | 0.005670302  | 0 | 0           |
| cov1_2_3_4_5_7_8_10  | 48.0076 | -639.265 | 0.6544707 | 0 | 0.036574638  | 0 | 0.027755824 |
| cov2_3_4_5_7_8_9_10  | 48.0092 | -639.266 | 0.6533333 | 0 | 0            | 0 | 0.040854424 |
| cov2_3_4_5_7_8_10_11 | 48.0093 | -639.266 | 0.6533223 | 0 | 0            | 0 | 0.036295386 |
| cov2_4_5_7_8_9_10_11 | 48.0093 | -639.266 | 0.6536152 | 0 | 0            | 0 | 0.028647955 |
| cov1_4_5_6_7_8_10_11 | 48.0108 | -639.267 | 0.6551404 | 0 | 0.00490426   | 0 | 0           |
| cov1_3_4_5_7_8_9_11  | 48.016  | -639.269 | 0.6538532 | 0 | 0.048612544  | 0 | 0           |
| cov1_2_4_5_7_8_9_11  | 48.0181 | -639.27  | 0.6535835 | 0 | 0.010650615  | 0 | 0.024982291 |
| cov1_3_4_5_7_8_9_10  | 48.0184 | -639.271 | 0.6547516 | 0 | 0.056706346  | 0 | 0           |
| cov1_2_4_5_7_8_9_10  | 48.0196 | -639.271 | 0.6543921 | 0 | 0.017291401  | 0 | 0.025585516 |
| cov1_3_4_5_7_8_10_11 | 48.0248 | -639.274 | 0.6546515 | 0 | 0.049043204  | 0 | 0           |
| cov1_2_4_5_7_8_10_11 | 48.031  | -639.277 | 0.6544149 | 0 | 0.01100598   | 0 | 0.024325661 |
| cov1_4_5_7_8_9_10_11 | 48.0335 | -639.278 | 0.6545662 | 0 | 0.029690642  | 0 | 0           |
| cov3_4_5_7_8_9_10_11 | 48.059  | -639.291 | 0.6532957 | 0 | 0            | 0 | 0           |
| cov2_3_4_5_6_7_9_10  | 48.0888 | -639.306 | 0.6537848 | 0 | 0            | 0 | 0.029801149 |
| cov2_3_4_5_6_7_9_11  | 48.0911 | -639.307 | 0.6530901 | 0 | 0            | 0 | 0.02799893  |
| cov1_2_3_4_5_6_7_9   | 48.0994 | -639.311 | 0.6535496 | 0 | 0.008421691  | 0 | 0.027866542 |
| cov2_3_4_5_6_7_10_11 | 48.0994 | -639.311 | 0.6538976 | 0 | 0            | 0 | 0.027530293 |
| cov1_2_3_4_5_6_7_10  | 48.1084 | -639.315 | 0.6543605 | 0 | 0.008947732  | 0 | 0.027331941 |
| cov2_4_5_6_7_9_10_11 | 48.1169 | -639.32  | 0.6542182 | 0 | 0            | 0 | 0.020254098 |
| cov3_4_5_6_7_9_10_11 | 48.1196 | -639.321 | 0.653925  | 0 | 0            | 0 | 0           |
| cov1_3_4_5_6_7_9_10  | 48.1206 | -639.322 | 0.6546708 | 0 | 0.029215543  | 0 | 0           |
| cov1_2_4_5_6_7_9_10  | 48.1224 | -639.322 | 0.6543155 | 0 | -0.008261763 | 0 | 0.025216869 |
| cov1_3_4_5_6_7_9_11  | 48.1226 | -639.323 | 0.6538994 | 0 | 0.02380367   | 0 | 0           |
| cov1_2_4_5_6_7_9_11  | 48.1245 | -639.324 | 0.6535723 | 0 | -0.012512177 | 0 | 0.024791638 |
| cov1_3_4_5_6_7_10_11 | 48.1296 | -639.326 | 0.6546491 | 0 | 0.023640967  | 0 | 0           |
| cov2_3_4_5_7_9_10_11 | 48.1313 | -639.327 | 0.6528191 | 0 | 0            | 0 | 0.035449963 |
| cov1_2_3_4_5_7_9_11  | 48.1314 | -639.327 | 0.6530566 | 0 | 0.026241946  | 0 | 0.02736948  |
| cov1_2_3_4_5_7_9_10  | 48.1326 | -639.328 | 0.6539    | 0 | 0.033307317  | 0 | 0.028003464 |
| cov1_2_4_5_6_7_10_11 | 48.1355 | -639.329 | 0.6543841 | 0 | -0.012714003 | 0 | 0.024145762 |
| cov1_4_5_6_7_9_10_11 | 48.1398 | -639.331 | 0.6545405 | 0 | 0.006233979  | 0 | 0           |
| cov1_2_3_4_5_7_10_11 | 48.1416 | -639.332 | 0.6538709 | 0 | 0.027158707  | 0 | 0.026800235 |
| cov2_3_4_5_6_8_9_10  | 48.1485 | -639.336 | 0.6536347 | 0 | 0            | 0 | 0.030721887 |
| cov1_2_4_5_7_9_10_11 | 48.1501 | -639.336 | 0.6538263 | 0 | 0.009158907  | 0 | 0.024888295 |
| cov1_3_4_5_7_9_10_11 | 48.1508 | -639.337 | 0.6541077 | 0 | 0.046070204  | 0 | 0           |
| cov2_3_4_5_6_8_9_11  | 48.1518 | -639.337 | 0.6529385 | 0 | 0            | 0 | 0.029022149 |
| cov1_2_4_6_7_8_9_10  | 48.1571 | -639.34  | 0.653393  | 0 | -0.080409991 | 0 | 0.054337385 |
| cov1_2_3_4_5_6_8_9   | 48.1578 | -639.34  | 0.6534665 | 0 | 0.01358733   | 0 | 0.027340611 |
| cov2_3_4_5_6_8_10_11 | 48.1598 | -639.341 | 0.6537387 | 0 | 0            | 0 | 0.028540235 |
| cov1_2_3_4_5_6_8_10  | 48.1662 | -639.344 | 0.6542788 | 0 | 0.014069235  | 0 | 0.026822893 |
| cov1_2_4_6_7_8_9_11  | 48.1672 | -639.345 | 0.6525382 | 0 | -0.085819177 | 0 | 0.054673023 |
| cov1_2_4_6_7_8_10_11 | 48.1713 | -639.347 | 0.6534841 | 0 | -0.084817084 | 0 | 0.05329193  |
| cov1_2_3_4_6_7_8_9   | 48.175  | -639.349 | 0.652947  | 0 | -0.080899107 | 0 | 0.055214354 |
| cov1_3_4_5_6_8_9_10  | 48.1774 | -639.35  | 0.6545815 | 0 | 0.033927309  | 0 | 0           |
| cov1_2_3_4_6_7_8_10  | 48.1796 | -639.351 | 0.6538586 | 0 | -0.07954945  | 0 | 0.054385203 |
| cov1_3_4_5_6_8_9_11  | 48.1812 | -639.352 | 0.6538037 | 0 | 0.029016362  | 0 | 0           |

|                      |         |          |           |   |              |             |
|----------------------|---------|----------|-----------|---|--------------|-------------|
| cov3_4_5_6_8_9_10_11 | 48.183  | -639.353 | 0.65379   | 0 | 0            | 0           |
| cov1_3_4_5_6_8_10_11 | 48.1878 | -639.355 | 0.6545916 | 0 | 0.02886868   | 0           |
| cov1_2_3_4_5_8_9_10  | 48.1893 | -639.356 | 0.6538224 | 0 | 0.037859991  | 0.027501698 |
| cov1_2_3_4_5_8_9_11  | 48.1901 | -639.356 | 0.6530018 | 0 | 0.031388698  | 0.026914059 |
| cov2_4_5_6_8_9_10_11 | 48.1914 | -639.357 | 0.6541877 | 0 | 0            | 0.02006696  |
| cov1_2_4_7_8_9_10_11 | 48.1936 | -639.358 | 0.6528921 | 0 | -0.060615828 | 0.054171111 |
| cov2_3_4_5_8_9_10_11 | 48.1951 | -639.359 | 0.6526598 | 0 | 0            | 0.036697948 |
| cov1_2_4_5_6_8_9_10  | 48.1964 | -639.36  | 0.6542955 | 0 | -0.006133775 | 0.024149483 |
| cov1_2_3_4_5_8_10_11 | 48.1998 | -639.361 | 0.6538211 | 0 | 0.032282228  | 0.026342533 |
| cov1_2_4_5_6_8_9_11  | 48.2001 | -639.361 | 0.6536055 | 0 | -0.009882043 | 0.023787062 |
| cov1_2_3_4_7_8_9_10  | 48.2063 | -639.364 | 0.653423  | 0 | -0.052987986 | 0.05478975  |
| cov1_3_4_5_8_9_10_11 | 48.2081 | -639.365 | 0.654046  | 0 | 0.05084116   | 0           |
| cov1_2_4_5_6_8_10_11 | 48.2112 | -639.367 | 0.6544194 | 0 | -0.010034872 | 0.023114464 |
| cov1_2_3_4_7_8_9_11  | 48.2119 | -639.367 | 0.6524871 | 0 | -0.061072523 | 0.054658436 |
| cov1_4_5_6_8_9_10_11 | 48.2133 | -639.368 | 0.6545471 | 0 | 0.008023639  | 0           |
| cov1_2_3_4_7_8_10_11 | 48.218  | -639.37  | 0.6534015 | 0 | -0.059355676 | 0.053733555 |
| cov1_2_4_5_8_9_10_11 | 48.2233 | -639.373 | 0.6538364 | 0 | 0.011030705  | 0.023855323 |
| cov1_2_4_6_7_9_10_11 | 48.2967 | -639.41  | 0.6528719 | 0 | -0.08358551  | 0.053675725 |
| cov1_4_6_7_8_9_10_11 | 48.3041 | -639.413 | 0.6541874 | 0 | -0.063887155 | 0           |
| cov1_3_4_6_7_8_9_10  | 48.305  | -639.414 | 0.6549356 | 0 | -0.059883003 | 0           |
| cov1_2_3_4_6_7_9_10  | 48.3054 | -639.414 | 0.6533148 | 0 | -0.078409565 | 0.054054378 |
| cov1_3_4_6_7_8_10_11 | 48.314  | -639.418 | 0.6548962 | 0 | -0.065847583 | 0           |
| cov1_2_3_4_6_7_9_11  | 48.3146 | -639.419 | 0.6524727 | 0 | -0.084070715 | 0.054071648 |
| cov1_3_4_6_7_8_9_11  | 48.3151 | -639.419 | 0.6539939 | 0 | -0.066555156 | 0           |
| cov1_2_3_4_6_7_10_11 | 48.3189 | -639.421 | 0.6533876 | 0 | -0.082954246 | 0.053166771 |
| cov1_2_3_4_7_9_10_11 | 48.3343 | -639.428 | 0.6528445 | 0 | -0.060984255 | 0.053400408 |
| cov1_3_4_7_8_9_10_11 | 48.3376 | -639.43  | 0.65434   | 0 | -0.041588409 | 0           |
| cov2_4_6_7_8_9_10_11 | 48.3724 | -639.447 | 0.65565   | 0 | 0            | 0.034174269 |
| cov2_3_4_6_7_8_9_10  | 48.375  | -639.449 | 0.6553944 | 0 | 0            | 0.03405718  |
| cov1_2_4_6_8_9_10_11 | 48.3787 | -639.451 | 0.6528928 | 0 | -0.082091015 | 0.053156696 |
| cov1_2_3_4_6_8_9_10  | 48.3854 | -639.454 | 0.6531887 | 0 | -0.077104692 | 0.054843844 |
| cov2_3_4_7_8_9_10_11 | 48.3866 | -639.455 | 0.6561343 | 0 | 0            | 0.031263045 |
| cov2_3_4_6_7_8_10_11 | 48.3904 | -639.456 | 0.6559579 | 0 | 0            | 0.035358232 |
| cov2_3_4_6_7_8_9_11  | 48.392  | -639.457 | 0.6551251 | 0 | 0            | 0.036048676 |
| cov1_2_3_4_6_8_9_11  | 48.3968 | -639.46  | 0.6523758 | 0 | -0.082280961 | 0.054936842 |
| cov1_2_3_4_6_8_10_11 | 48.4003 | -639.461 | 0.6532763 | 0 | -0.081173913 | 0.05401497  |
| cov1_2_3_4_8_9_10_11 | 48.414  | -639.468 | 0.6528675 | 0 | -0.059554993 | 0.054080911 |
| cov1_3_4_6_7_9_10_11 | 48.438  | -639.48  | 0.6543432 | 0 | -0.064878536 | 0           |
| cov3_4_6_7_8_9_10_11 | 48.4387 | -639.481 | 0.6561273 | 0 | 0            | 0           |
| cov2_3_4_6_7_9_10_11 | 48.51   | -639.516 | 0.6554379 | 0 | 0            | 0.035246756 |
| cov1_3_4_6_8_9_10_11 | 48.5241 | -639.523 | 0.6542629 | 0 | -0.062728006 | 0           |
| cov1_2_3_4_5_6_9_10  | 48.5392 | -639.531 | 0.6532143 | 0 | 0.069099633  | 0.020701791 |
| cov1_2_3_4_5_6_9_11  | 48.5551 | -639.539 | 0.6528482 | 0 | 0.070848358  | 0.021072013 |
| cov1_2_3_4_5_6_10_11 | 48.5568 | -639.54  | 0.65365   | 0 | 0.07054138   | 0.02054541  |
| cov1_3_4_5_6_9_10_11 | 48.5576 | -639.54  | 0.6537677 | 0 | 0.084681912  | 0           |
| cov1_2_3_6_7_8_9_10  | 48.5618 | -639.542 | 0.6533884 | 0 | -0.067542601 | 0.10876216  |
| cov1_2_3_6_7_8_9_11  | 48.5671 | -639.545 | 0.6526302 | 0 | -0.072852334 | 0.10849753  |

|                      |         |          |           |   |              |   |             |
|----------------------|---------|----------|-----------|---|--------------|---|-------------|
| cov1_2_3_5_6_7_8_9   | 48.5728 | -639.548 | 0.6529713 | 0 | -0.074441124 | 0 | 0.10860634  |
| cov1_2_3_6_7_8_10_11 | 48.5742 | -639.548 | 0.6534388 | 0 | -0.071802949 | 0 | 0.10791997  |
| cov1_2_3_5_6_7_8_10  | 48.5801 | -639.551 | 0.6537977 | 0 | -0.07383421  | 0 | 0.10803     |
| cov2_3_4_6_8_9_10_11 | 48.5828 | -639.553 | 0.6552923 | 0 | 0            | 0 | 0.036411172 |
| cov1_2_3_4_5_9_10_11 | 48.5969 | -639.56  | 0.6531126 | 0 | 0.098589325  | 0 | 0.020908784 |
| cov1_2_5_6_7_8_9_10  | 48.6106 | -639.567 | 0.6537889 | 0 | -0.095025582 | 0 | 0.10600515  |
| cov1_2_5_6_7_8_9_11  | 48.6152 | -639.569 | 0.6530614 | 0 | -0.09896414  | 0 | 0.10577114  |
| cov2_3_4_5_6_9_10_11 | 48.624  | -639.573 | 0.6518079 | 0 | 0            | 0 | 0.041224597 |
| cov1_2_5_6_7_8_10_11 | 48.6253 | -639.574 | 0.6538889 | 0 | -0.099150545 | 0 | 0.10507727  |
| cov1_2_3_7_8_9_10_11 | 48.6319 | -639.577 | 0.6529943 | 0 | -0.039067258 | 0 | 0.11075285  |
| cov1_2_3_5_7_8_9_10  | 48.6406 | -639.582 | 0.6534578 | 0 | -0.042785162 | 0 | 0.11074985  |
| cov1_2_3_5_7_8_9_11  | 48.6408 | -639.582 | 0.6525621 | 0 | -0.049951301 | 0 | 0.11020885  |
| cov1_2_3_5_7_8_10_11 | 48.65   | -639.586 | 0.6533981 | 0 | -0.048959622 | 0 | 0.10965549  |
| cov1_2_6_7_8_9_10_11 | 48.6504 | -639.586 | 0.6539484 | 0 | -0.072514819 | 0 | 0.10699614  |
| cov2_3_5_6_7_8_9_10  | 48.6659 | -639.594 | 0.6545876 | 0 | 0            | 0 | 0.097575544 |
| cov1_2_5_7_8_9_10_11 | 48.6714 | -639.597 | 0.6533713 | 0 | -0.070578579 | 0 | 0.10767902  |
| cov2_3_5_6_7_8_9_11  | 48.6777 | -639.6   | 0.6542064 | 0 | 0            | 0 | 0.097948189 |
| cov2_3_5_6_7_8_10_11 | 48.6833 | -639.603 | 0.6549495 | 0 | 0            | 0 | 0.097413874 |
| cov2_3_5_7_8_9_10_11 | 48.6844 | -639.604 | 0.6542339 | 0 | 0            | 0 | 0.10082652  |
| cov1_2_3_6_7_9_10_11 | 48.71   | -639.616 | 0.6529173 | 0 | -0.070453737 | 0 | 0.10824271  |
| cov1_2_3_5_6_7_9_10  | 48.7148 | -639.619 | 0.6532669 | 0 | -0.07443944  | 0 | 0.10821933  |
| cov2_3_6_7_8_9_10_11 | 48.7163 | -639.619 | 0.6552286 | 0 | 0            | 0 | 0.088347239 |
| cov1_2_3_5_6_7_9_11  | 48.7201 | -639.621 | 0.6524976 | 0 | -0.078930352 | 0 | 0.10794039  |
| cov1_2_3_5_6_7_10_11 | 48.7269 | -639.625 | 0.6533106 | 0 | -0.078536378 | 0 | 0.10730552  |
| cov1_2_5_6_7_9_10_11 | 48.751  | -639.637 | 0.653297  | 0 | -0.098279453 | 0 | 0.10548725  |
| cov1_2_3_5_7_9_10_11 | 48.7722 | -639.647 | 0.6528453 | 0 | -0.052149841 | 0 | 0.10966158  |
| cov1_2_3_6_8_9_10_11 | 48.781  | -639.652 | 0.6528382 | 0 | -0.068965804 | 0 | 0.10838252  |
| cov1_2_3_5_6_8_9_10  | 48.7866 | -639.655 | 0.6531742 | 0 | -0.069833394 | 0 | 0.10857169  |
| cov1_2_3_5_6_8_9_11  | 48.7936 | -639.658 | 0.6524364 | 0 | -0.073823506 | 0 | 0.10835917  |
| cov1_2_3_5_6_8_10_11 | 48.7999 | -639.661 | 0.6532496 | 0 | -0.073450213 | 0 | 0.10772116  |
| cov2_5_6_7_8_9_10_11 | 48.81   | -639.666 | 0.6561327 | 0 | 0            | 0 | 0.088961187 |
| cov2_3_5_6_7_9_10_11 | 48.8192 | -639.671 | 0.6544638 | 0 | 0            | 0 | 0.097521413 |
| cov1_2_5_6_8_9_10_11 | 48.8434 | -639.683 | 0.6533188 | 0 | -0.096505523 | 0 | 0.10552255  |
| cov1_2_3_5_8_9_10_11 | 48.8438 | -639.683 | 0.6527875 | 0 | -0.047576354 | 0 | 0.11003453  |
| cov2_3_5_6_8_9_10_11 | 48.879  | -639.701 | 0.6542957 | 0 | 0            | 0 | 0.098481966 |
| cov1_2_3_4_5_6_7_8   | 49.2549 | -639.889 | 0.6538677 | 0 | 0.079631891  | 0 | 0.03232588  |
| cov1_2_4_5_6_7_8_11  | 49.2767 | -639.9   | 0.653956  | 0 | 0.063438502  | 0 | 0.029905097 |
| cov1_2_3_4_6_9_10_11 | 49.2876 | -639.905 | 0.6516829 | 0 | -0.066564884 | 0 | 0.072278663 |
| cov1_3_4_5_6_7_8_11  | 49.2964 | -639.91  | 0.6545854 | 0 | 0.10147017   | 0 | 0           |
| cov2_3_4_5_6_7_8_11  | 49.3477 | -639.935 | 0.6523007 | 0 | 0            | 0 | 0.053929471 |
| cov1_2_3_5_6_9_10_11 | 49.3617 | -639.942 | 0.6524362 | 0 | -0.011829877 | 0 | 0.11311901  |
| cov1_2_3_4_5_6_7_11  | 49.4051 | -639.964 | 0.6535496 | 0 | 0.077381381  | 0 | 0.031950458 |
| cov1_2_3_4_5_7_8_11  | 49.427  | -639.975 | 0.6534029 | 0 | 0.12990203   | 0 | 0.032690473 |
| cov3_5_6_7_8_9_10_11 | 49.4506 | -639.987 | 0.6575682 | 0 | 0            | 0 | 0           |
| cov1_3_5_6_7_8_10_11 | 49.4586 | -639.991 | 0.6576215 | 0 | -0.020762464 | 0 | 0           |
| cov1_3_5_6_7_8_9_11  | 49.462  | -639.992 | 0.6568503 | 0 | -0.020491674 | 0 | 0           |
| cov1_3_6_7_8_9_10_11 | 49.4628 | -639.993 | 0.657446  | 0 | 0.001890165  | 0 | 0           |

|                        |         |          |           |   |              |   |              |
|------------------------|---------|----------|-----------|---|--------------|---|--------------|
| cov1_5_6_7_8_9_10_11   | 49.4635 | -639.993 | 0.6575632 | 0 | -0.035490604 | 0 | 0            |
| cov1_3_5_6_7_8_9_10    | 49.4642 | -639.993 | 0.6578929 | 0 | -0.012557744 | 0 | 0            |
| cov1_2_3_4_5_6_8_11    | 49.4699 | -639.996 | 0.6534996 | 0 | 0.083250411  | 0 | 0.03148757   |
| cov1_3_5_7_8_9_10_11   | 49.5597 | -640.041 | 0.6572823 | 0 | 0.016747654  | 0 | 0            |
| cov1_3_5_6_7_9_10_11   | 49.5967 | -640.06  | 0.6571596 | 0 | -0.021305973 | 0 | 0            |
| cov1_3_5_6_8_9_10_11   | 49.6768 | -640.1   | 0.6570876 | 0 | -0.015775887 | 0 | 0            |
| cov1_2_4_5_6_9_10_11   | 49.8167 | -640.17  | 0.6566461 | 0 | 0.052080462  | 0 | -0.014168694 |
| cov1_2_3_5_6_7_8_11    | 49.9694 | -640.246 | 0.652757  | 0 | -0.00788036  | 0 | 0.11836264   |
| cov1_2_3_4_6_7_8_11    | 50.0387 | -640.281 | 0.6525529 | 0 | -0.075215204 | 0 | 0.086351049  |
| cov2_3_4_5_6_7_8_9_10  | 55.1421 | -639.228 | 0.6538836 | 0 | 0            | 0 | 0.029620163  |
| cov2_3_4_5_6_7_8_9_11  | 55.1452 | -639.229 | 0.653197  | 0 | 0            | 0 | 0.027876577  |
| cov1_2_3_4_5_6_7_8_9   | 55.1531 | -639.233 | 0.6536379 | 0 | 0.007707505  | 0 | 0.027815254  |
| cov2_3_4_5_6_7_8_10_11 | 55.1534 | -639.233 | 0.653993  | 0 | 0            | 0 | 0.027396171  |
| cov1_2_3_4_5_6_7_8_10  | 55.1618 | -639.238 | 0.6544507 | 0 | 0.008268523  | 0 | 0.027308635  |
| cov3_4_5_6_7_8_9_10_11 | 55.173  | -639.243 | 0.6540339 | 0 | 0            | 0 | 0            |
| cov1_3_4_5_6_7_8_9_10  | 55.1739 | -639.244 | 0.6547618 | 0 | 0.028457861  | 0 | 0            |
| cov1_3_4_5_6_7_8_9_11  | 55.1766 | -639.245 | 0.6539703 | 0 | 0.023256311  | 0 | 0            |
| cov2_4_5_6_7_8_9_10_11 | 55.1776 | -639.245 | 0.6543826 | 0 | 0            | 0 | 0.019520748  |
| cov1_2_4_5_6_7_8_9_10  | 55.1817 | -639.247 | 0.6544165 | 0 | -0.010083081 | 0 | 0.024971388  |
| cov1_3_4_5_6_7_8_10_11 | 55.1835 | -639.248 | 0.6547552 | 0 | 0.023088689  | 0 | 0            |
| cov1_2_4_5_6_7_8_9_11  | 55.1844 | -639.249 | 0.6537123 | 0 | -0.01413546  | 0 | 0.024564539  |
| cov1_2_3_4_5_7_8_9_11  | 55.1932 | -639.253 | 0.6531455 | 0 | 0.027770373  | 0 | 0.027394074  |
| cov1_2_3_4_5_7_8_9_10  | 55.194  | -639.254 | 0.6539852 | 0 | 0.034746648  | 0 | 0.028025211  |
| cov2_3_4_5_7_8_9_10_11 | 55.1945 | -639.254 | 0.6528749 | 0 | 0            | 0 | 0.035940679  |
| cov1_2_4_5_6_7_8_10_11 | 55.1955 | -639.254 | 0.6545181 | 0 | -0.014336888 | 0 | 0.023922952  |
| cov1_4_5_6_7_8_9_10_11 | 55.1991 | -639.256 | 0.6546795 | 0 | 0.004389477  | 0 | 0            |
| cov1_2_3_4_5_7_8_10_11 | 55.2034 | -639.258 | 0.6539633 | 0 | 0.028684648  | 0 | 0.026820688  |
| cov1_3_4_5_7_8_9_10_11 | 55.2124 | -639.263 | 0.6541967 | 0 | 0.0475953    | 0 | 0            |
| cov1_2_4_5_7_8_9_10_11 | 55.2166 | -639.265 | 0.6539194 | 0 | 0.009594735  | 0 | 0.024660559  |
| cov2_3_4_5_6_7_9_10_11 | 55.2884 | -639.301 | 0.6534479 | 0 | 0            | 0 | 0.027518089  |
| cov1_2_3_4_5_6_7_9_10  | 55.2971 | -639.305 | 0.6538969 | 0 | 0.007807121  | 0 | 0.027595962  |
| cov1_2_3_4_5_6_7_9_11  | 55.3003 | -639.307 | 0.6531537 | 0 | 0.003249593  | 0 | 0.027150012  |
| cov1_2_3_4_5_6_7_10_11 | 55.3086 | -639.311 | 0.6539545 | 0 | 0.003602616  | 0 | 0.026583311  |
| cov1_3_4_5_6_7_9_10_11 | 55.3192 | -639.316 | 0.6542117 | 0 | 0.022797927  | 0 | 0            |
| cov1_2_4_5_6_7_9_10_11 | 55.3232 | -639.318 | 0.6539065 | 0 | -0.013499253 | 0 | 0.024473567  |
| cov1_2_3_4_5_7_9_10_11 | 55.3286 | -639.321 | 0.6534124 | 0 | 0.025489524  | 0 | 0.027072046  |
| cov2_3_4_5_6_8_9_10_11 | 55.3487 | -639.331 | 0.6533047 | 0 | 0            | 0 | 0.028530351  |
| cov1_2_3_4_5_6_8_9_10  | 55.3552 | -639.334 | 0.6538174 | 0 | 0.012959868  | 0 | 0.027067582  |
| cov1_2_4_6_7_8_9_10_11 | 55.3583 | -639.336 | 0.6529927 | 0 | -0.085489261 | 0 | 0.053589884  |
| cov1_2_3_4_5_6_8_9_11  | 55.36   | -639.337 | 0.6530975 | 0 | 0.008891662  | 0 | 0.02667272   |
| cov1_2_3_4_6_7_8_9_10  | 55.3664 | -639.34  | 0.6533811 | 0 | -0.080378232 | 0 | 0.054483855  |
| cov1_2_3_4_5_6_8_10_11 | 55.3679 | -639.341 | 0.6538967 | 0 | 0.009207913  | 0 | 0.02611209   |
| cov1_2_3_4_6_7_8_9_11  | 55.3765 | -639.345 | 0.6525465 | 0 | -0.085806639 | 0 | 0.054590475  |
| cov1_3_4_5_6_8_9_10_11 | 55.3776 | -639.345 | 0.6541482 | 0 | 0.028034021  | 0 | 0            |
| cov1_2_3_4_6_7_8_10_11 | 55.3805 | -639.347 | 0.6534458 | 0 | -0.084696043 | 0 | 0.053676817  |
| cov1_2_3_4_5_8_9_10_11 | 55.387  | -639.35  | 0.6533534 | 0 | 0.030613538  | 0 | 0.026620149  |
| cov1_2_4_5_6_8_9_10_11 | 55.3988 | -639.356 | 0.6539524 | 0 | -0.010845745 | 0 | 0.023447219  |



|                            |         |          |           |   |              |   |             |
|----------------------------|---------|----------|-----------|---|--------------|---|-------------|
| cov1_2_3_4_7_8_9_10_11     | 55.4029 | -639.358 | 0.6529143 | 0 | -0.060696799 | 0 | 0.053906729 |
| cov1_3_4_6_7_8_9_10_11     | 55.5019 | -639.408 | 0.6544316 | 0 | -0.066433946 | 0 | 0           |
| cov1_2_3_4_6_7_9_10_11     | 55.5059 | -639.41  | 0.6528979 | 0 | -0.083668098 | 0 | 0.053325242 |
| cov2_3_4_6_7_8_9_10_11     | 55.581  | -639.447 | 0.6555556 | 0 | 0            | 0 | 0.035356377 |
| cov1_2_3_4_6_8_9_10_11     | 55.5874 | -639.45  | 0.6528074 | 0 | -0.081882498 | 0 | 0.054175965 |
| cov1_2_3_4_5_6_9_10_11     | 55.7484 | -639.531 | 0.6532357 | 0 | 0.069710018  | 0 | 0.020774657 |
| cov1_2_3_6_7_8_9_10_11     | 55.7634 | -639.538 | 0.6529982 | 0 | -0.072490138 | 0 | 0.10812263  |
| cov1_2_3_5_6_7_8_9_10      | 55.7688 | -639.541 | 0.6533419 | 0 | -0.074994302 | 0 | 0.1082322   |
| cov1_2_3_5_6_7_8_9_11      | 55.7747 | -639.544 | 0.6525827 | 0 | -0.079262535 | 0 | 0.10801444  |
| cov1_2_3_5_6_7_8_10_11     | 55.7814 | -639.547 | 0.6533973 | 0 | -0.078876339 | 0 | 0.10737785  |
| cov1_2_5_6_7_8_9_10_11     | 55.8126 | -639.563 | 0.653414  | 0 | -0.099921219 | 0 | 0.10536692  |
| cov1_2_3_5_7_8_9_10_11     | 55.8362 | -639.575 | 0.6529311 | 0 | -0.050680674 | 0 | 0.10980446  |
| cov2_3_5_6_7_8_9_10_11     | 55.8752 | -639.594 | 0.6545584 | 0 | 0            | 0 | 0.097508408 |
| cov1_2_3_5_6_7_9_10_11     | 55.9158 | -639.615 | 0.6528619 | 0 | -0.079595669 | 0 | 0.10754938  |
| cov1_2_3_5_6_8_9_10_11     | 55.989  | -639.651 | 0.6528045 | 0 | -0.074501399 | 0 | 0.1079637   |
| cov1_2_3_4_5_6_7_8_11      | 56.4619 | -639.888 | 0.6536539 | 0 | 0.077028441  | 0 | 0.031951998 |
| cov1_3_5_6_7_8_9_10_11     | 56.651  | -639.982 | 0.6572502 | 0 | -0.021629003 | 0 | 0           |
| cov2_3_4_5_6_7_8_9_10_11   | 62.3424 | -639.223 | 0.6535583 | 0 | 0            | 0 | 0.027415742 |
| cov1_2_3_4_5_6_7_8_9_10    | 62.3507 | -639.227 | 0.6539867 | 0 | 0.007117086  | 0 | 0.027557411 |
| cov1_2_3_4_5_6_7_8_9_11    | 62.3544 | -639.229 | 0.6532489 | 0 | 0.002770557  | 0 | 0.027139178 |
| cov1_2_3_4_5_6_7_8_10_11   | 62.3626 | -639.233 | 0.6540495 | 0 | 0.003100234  | 0 | 0.026578123 |
| cov1_3_4_5_6_7_8_9_10_11   | 62.3732 | -639.239 | 0.6543142 | 0 | 0.022283795  | 0 | 0           |
| cov1_2_4_5_6_7_8_9_10_11   | 62.3831 | -639.243 | 0.6540385 | 0 | -0.015125285 | 0 | 0.024251345 |
| cov1_2_3_4_5_7_8_9_10_11   | 62.3903 | -639.247 | 0.6534905 | 0 | 0.027000199  | 0 | 0.027101847 |
| cov1_2_3_4_5_6_7_9_10_11   | 62.4976 | -639.301 | 0.6534915 | 0 | 0.002536186  | 0 | 0.026851956 |
| cov1_2_3_4_5_6_8_9_10_11   | 62.5571 | -639.33  | 0.6534451 | 0 | 0.008151133  | 0 | 0.026382467 |
| cov1_2_3_4_6_7_8_9_10_11   | 62.5676 | -639.336 | 0.6529755 | 0 | -0.085404609 | 0 | 0.053838447 |
| cov1_2_3_5_6_7_8_9_10_11   | 62.9703 | -639.537 | 0.6529501 | 0 | -0.079959183 | 0 | 0.10758604  |
| cov1_2_3_4_5_6_7_8_9_10_11 | 69.5517 | -639.223 | 0.6535942 | 0 | 0.002027582  | 0 | 0.026834886 |

[illegible]

[illegible]

|   |              |   |             |   |              |   |              |             |
|---|--------------|---|-------------|---|--------------|---|--------------|-------------|
| 0 | 0            | 0 | 0           | 0 | 0            | 0 | 0            | -0.19287183 |
| 0 | 0            | 0 | 0.1868977   | 0 | -0.099101883 | 0 | 0            | 0           |
| 0 | 0            | 0 | 0.18631057  | 0 | -0.096840845 | 0 | 0            | 0           |
| 0 | 0            | 0 | 0           | 0 | 0            | 0 | 0            | 0           |
| 0 | 0            | 0 | 0           | 0 | 0            | 0 | 0            | 0           |
| 0 | 0            | 0 | 0           | 0 | 0            | 0 | 0            | -0.62644739 |
| 0 | 0            | 0 | 0           | 0 | -0.030675119 | 0 | 0            | -0.18939468 |
| 0 | -0.11569845  | 0 | 0           | 0 | 0            | 0 | 0.073875539  | 0           |
| 0 | 0            | 0 | 0           | 0 | 0            | 0 | 0.029744557  | -0.18749585 |
| 0 | -0.11463199  | 0 | 0           | 0 | 0            | 0 | 0.072441872  | 0           |
| 0 | 0            | 0 | 0           | 0 | 0            | 0 | 0            | -0.6264962  |
| 0 | 0            | 0 | 0.025838758 | 0 | 0            | 0 | 0            | -0.18536087 |
| 0 | 0.019213306  | 0 | 0           | 0 | 0            | 0 | 0            | -0.20708414 |
| 0 | 0            | 0 | 0           | 0 | -0.030583762 | 0 | 0            | 0           |
| 0 | 0            | 0 | 0.12085799  | 0 | 0            | 0 | 0            | 0           |
| 0 | 0            | 0 | 0.11987571  | 0 | 0            | 0 | 0            | 0           |
| 0 | 0            | 0 | 0           | 0 | 0            | 0 | 0            | -0.62651018 |
| 0 | 0            | 0 | 0           | 0 | 0            | 0 | 0            | -0.19093406 |
| 0 | 0            | 0 | 0           | 0 | 0            | 0 | 0            | -0.18970475 |
| 0 | 0            | 0 | 0           | 0 | 0            | 0 | 0.029365556  | 0           |
| 0 | 0            | 0 | 0.13037632  | 0 | 0            | 0 | 0            | 0           |
| 0 | 0            | 0 | 0.12982482  | 0 | 0            | 0 | 0            | 0           |
| 0 | 0            | 0 | 0.026470461 | 0 | 0            | 0 | 0            | 0           |
| 0 | -0.11591656  | 0 | 0           | 0 | 0            | 0 | 0            | 0           |
| 0 | -0.020554159 | 0 | 0           | 0 | 0            | 0 | 0            | -0.15883585 |
| 0 | -0.11481324  | 0 | 0           | 0 | 0            | 0 | 0            | 0           |
| 0 | 0            | 0 | 0           | 0 | 0            | 0 | 0            | -0.17815669 |
| 0 | 0.015622632  | 0 | 0           | 0 | 0            | 0 | 0            | 0           |
| 0 | 0            | 0 | 0           | 0 | 0            | 0 | 0            | 0           |
| 0 | 0            | 0 | 0           | 0 | 0            | 0 | 0            | 0           |
| 0 | -0.021681982 | 0 | 0           | 0 | 0            | 0 | 0            | -0.1581028  |
| 0 | -0.024602119 | 0 | 0           | 0 | 0            | 0 | 0            | 0           |
| 0 | 0            | 0 | 0.11326692  | 0 | 0            | 0 | -0.015696938 | 0           |
| 0 | 0            | 0 | 0.11261578  | 0 | 0            | 0 | -0.016766993 | 0           |
| 0 | 0            | 0 | 0.10233803  | 0 | 0            | 0 | 0            | 0           |
| 0 | 0            | 0 | 0           | 0 | 0            | 0 | 0            | 0           |
| 0 | 0            | 0 | 0.10460852  | 0 | 0            | 0 | 0            | 0           |
| 0 | 0            | 0 | 0.10294938  | 0 | 0            | 0 | 0            | 0           |
| 0 | -0.02576805  | 0 | 0           | 0 | 0            | 0 | 0            | 0           |
| 0 | 0.087435654  | 0 | 0.11233106  | 0 | 0            | 0 | 0            | -0.25283145 |
| 0 | 0            | 0 | 0.063881802 | 0 | 0            | 0 | 0.063142532  | -0.17645527 |
| 0 | 0            | 0 | 0.064534722 | 0 | 0            | 0 | 0.062644204  | 0           |
| 0 | 0.083946026  | 0 | 0.11251071  | 0 | 0            | 0 | 0            | 0           |
| 0 | -0.10369479  | 0 | 0           | 0 | 0.052073852  | 0 | 0            | 0           |
| 0 | -0.10286966  | 0 | 0           | 0 | 0.05013721   | 0 | 0            | 0           |
| 0 | -0.12382076  | 0 | 0           | 0 | 0            | 0 | 0            | 0           |
| 0 | -0.12235193  | 0 | 0           | 0 | 0            | 0 | 0            | 0           |

|   |              |   |             |   |              |            |             |             |
|---|--------------|---|-------------|---|--------------|------------|-------------|-------------|
| 0 | 0            | 0 | 0.071881595 | 0 | 0            | 0          | 0           | -0.17691928 |
| 0 | 0            | 0 | 0.16498703  | 0 | -0.064763326 | 0          | 0           | -0.16555821 |
| 0 | 0            | 0 | 0.072270446 | 0 | 0            | 0          | 0           | 0           |
| 0 | 0            | 0 | 0.16570219  | 0 | -0.065276528 | 0          | 0           | 0           |
| 0 | 0            | 0 | 0.088234167 | 0 | 0            | 0          | 0           | -0.18680191 |
| 0 | 0            | 0 | 0           | 0 | 0            | 0.10641833 | 0           | -0.62665368 |
| 0 | 0            | 0 | 0.10854584  | 0 | 0            | 0          | 0           | -0.62633652 |
| 0 | 0            | 0 | 0.088891343 | 0 | 0            | 0          | 0           | 0           |
| 0 | 0            | 0 | 0           | 0 | -0.022623882 | 0          | 0.12335693  | -0.18398835 |
| 0 | 0.022400751  | 0 | 0           | 0 | 0            | 0          | 0.10275452  | -0.20570762 |
| 0 | 0            | 0 | 0           | 0 | 0            | 0          | 0.0960246   | -0.18934013 |
| 0 | 0            | 0 | 0           | 0 | 0            | 0          | 0.088008574 | -0.18498045 |
| 0 | 0            | 0 | 0           | 0 | 0            | 0          | 0           | 0           |
| 0 | 0            | 0 | 0           | 0 | -0.022174645 | 0          | 0.12294102  | 0           |
| 0 | 0            | 0 | 0           | 0 | 0            | 0          | 0           | 0           |
| 0 | 0.018419526  | 0 | 0           | 0 | 0            | 0          | 0.10322048  | 0           |
| 0 | 0            | 0 | 0           | 0 | 0            | 0          | 0.096299141 | 0           |
| 0 | 0            | 0 | 0           | 0 | 0            | 0          | 0.086773742 | 0           |
| 0 | 0            | 0 | 0.20824525  | 0 | -0.24703768  | 0          | 0           | 0           |
| 0 | 0            | 0 | 0           | 0 | 0            | 0          | 0           | 0           |
| 0 | -0.11175102  | 0 | 0           | 0 | 0            | 0          | 0           | 0           |
| 0 | 0            | 0 | 0           | 0 | -0.049827487 | 0          | 0           | -0.18397633 |
| 0 | 0            | 0 | 0           | 0 | 0            | 0          | 0           | 0           |
| 0 | 0            | 0 | 0           | 0 | 0            | 0          | 0           | 0           |
| 0 | 0            | 0 | 0           | 0 | 0            | 0          | 0           | -0.62642278 |
| 0 | 0            | 0 | 0           | 0 | 0            | 0          | 0.004445999 | 0           |
| 0 | 0            | 0 | 0           | 0 | -0.003795614 | 0          | 0           | 0           |
| 0 | 0            | 0 | 0           | 0 | 0            | 0          | 0.006031885 | 0           |
| 0 | 0            | 0 | 0           | 0 | -0.002057527 | 0          | 0           | 0           |
| 0 | 0            | 0 | 0           | 0 | -0.049895504 | 0          | 0           | 0           |
| 0 | 0.026992318  | 0 | 0           | 0 | 0            | 0          | 0           | -0.21144036 |
| 0 | 0            | 0 | 0.19327846  | 0 | -0.18813411  | 0          | 0.12777021  | 0           |
| 0 | 0            | 0 | 0           | 0 | 0            | 0          | 0           | -0.1917913  |
| 0 | 0.023335466  | 0 | 0           | 0 | 0            | 0          | 0           | 0           |
| 0 | 0            | 0 | 0           | 0 | 0            | 0          | 0           | 0           |
| 0 | -0.10947488  | 0 | 0           | 0 | -0.066013412 | 0          | 0           | 0           |
| 0 | -0.093779384 | 0 | 0           | 0 | 0            | 0          | 0.044925504 | 0           |
| 0 | 0            | 0 | 0           | 0 | 0            | 0          | 0.084385302 | 0           |
| 0 | 0            | 0 | 0           | 0 | 0.024009638  | 0          | 0.047427364 | 0           |
| 0 | 0            | 0 | 0           | 0 | 0            | 0          | 0.085604271 | 0           |
| 0 | 0            | 0 | 0           | 0 | 0.025377566  | 0          | 0.047701788 | 0           |
| 0 | 0            | 0 | 0           | 0 | 0            | 0          | 0.068931798 | 0           |
| 0 | 0            | 0 | 0           | 0 | 0            | 0          | 0.057965187 | 0           |
| 0 | 0            | 0 | 0           | 0 | 0            | 0          | 0.05867645  | 0           |
| 0 | 0            | 0 | 0           | 0 | 0.033162511  | 0          | 0           | -0.21096968 |
| 0 | 0.084730994  | 0 | 0           | 0 | 0.079855733  | 0          | 0           | -0.27131406 |
| 0 | -0.090711478 | 0 | 0           | 0 | 0            | 0          | 0           | 0           |

|   |              |   |             |   |              |   |             |             |
|---|--------------|---|-------------|---|--------------|---|-------------|-------------|
| 0 | -0.092546631 | 0 | 0           | 0 | 0            | 0 | 0           | 0           |
| 0 | 0.041978885  | 0 | 0           | 0 | 0            | 0 | 0           | -0.25449292 |
| 0 | 0            | 0 | 0           | 0 | 0            | 0 | 0           | 0           |
| 0 | 0            | 0 | 0           | 0 | 0            | 0 | 0           | -0.62615937 |
| 0 | -0.091484517 | 0 | 0.002372151 | 0 | 0            | 0 | 0           | 0           |
| 0 | 0            | 0 | 0           | 0 | 0.035530949  | 0 | 0           | 0           |
| 0 | 0            | 0 | 0           | 0 | 0.037323564  | 0 | 0           | 0           |
| 0 | 0            | 0 | 0           | 0 | 0.068034068  | 0 | 0           | 0           |
| 0 | 0            | 0 | 0           | 0 | 0            | 0 | 0           | 0           |
| 0 | 0            | 0 | 0           | 0 | 0.060095279  | 0 | 0           | 0           |
| 0 | 0            | 0 | 0           | 0 | 0.069771651  | 0 | 0           | 0           |
| 0 | 0            | 0 | 0           | 0 | 0            | 0 | 0           | 0           |
| 0 | 0            | 0 | 0           | 0 | 0.03369093   | 0 | 0           | 0           |
| 0 | 0.081072758  | 0 | 0           | 0 | 0.079810053  | 0 | 0           | 0           |
| 0 | 0.038280153  | 0 | 0           | 0 | 0            | 0 | 0           | 0           |
| 0 | 0            | 0 | 0.13833673  | 0 | -0.11097845  | 0 | 0           | 0           |
| 0 | -0.1249678   | 0 | 0           | 0 | -0.13901403  | 0 | 0           | 0           |
| 0 | -0.10668932  | 0 | 0           | 0 | -0.069935715 | 0 | 0.1783342   | 0           |
| 0 | 0            | 0 | 0           | 0 | 0.075705318  | 0 | 0           | -0.6264222  |
| 0 | -0.071140849 | 0 | 0.054167671 | 0 | 0            | 0 | 0.084411092 | 0           |
| 0 | 0            | 0 | 0           | 0 | 0            | 0 | 0           | 0           |
| 0 | 0            | 0 | 0           | 0 | -0.065388636 | 0 | 0.075281504 | 0           |
| 0 | -0.088973579 | 0 | 0           | 0 | 0            | 0 | 0.10013555  | 0           |
| 0 | -0.038524762 | 0 | 0.1946081   | 0 | -0.089919419 | 0 | 0           | 0           |
| 0 | -0.087141533 | 0 | 0           | 0 | 0            | 0 | 0.12817381  | 0           |
| 0 | 0            | 0 | 0           | 0 | 0            | 0 | 0.064657175 | 0           |
| 0 | 0            | 0 | 0.20367393  | 0 | -0.11888356  | 0 | 0           | 0           |
| 0 | -0.066622281 | 0 | 0.062253405 | 0 | 0            | 0 | 0           | 0           |
| 0 | 0            | 0 | 0.048842601 | 0 | 0            | 0 | 0.033773572 | 0           |
| 0 | 0            | 0 | 0.05609242  | 0 | 0            | 0 | 0           | 0           |
| 0 | 0            | 0 | 0.083524183 | 0 | 0            | 0 | 0.083522234 | 0           |
| 0 | 0            | 0 | 0           | 0 | 0            | 0 | 0.080371236 | 0           |
| 0 | 0            | 0 | 0           | 0 | -0.06597733  | 0 | 0           | 0           |
| 0 | 0            | 0 | 0.054522169 | 0 | 0            | 0 | 0           | 0           |
| 0 | 0            | 0 | 0.085139946 | 0 | 0            | 0 | 0.084739615 | 0           |
| 0 | 0            | 0 | 0           | 0 | 0            | 0 | 0           | 0           |
| 0 | 0            | 0 | 0           | 0 | -0.024595922 | 0 | 0           | 0           |
| 0 | -0.085458351 | 0 | 0           | 0 | 0            | 0 | 0           | 0           |
| 0 | -0.052602798 | 0 | 0.10320845  | 0 | 0            | 0 | 0           | 0           |
| 0 | 0            | 0 | 0.089328699 | 0 | 0            | 0 | 0           | 0           |
| 0 | 0.071033455  | 0 | 0           | 0 | 0            | 0 | 0           | -0.627443   |
| 0 | 0            | 0 | 0           | 0 | -0.059957302 | 0 | 0.092756848 | 0           |
| 0 | 0            | 0 | 0           | 0 | 0            | 0 | 0.1002115   | 0           |
| 0 | 0            | 0 | 0           | 0 | -0.024745313 | 0 | 0.14712899  | 0           |
| 0 | 0            | 0 | 0           | 0 | -0.061626876 | 0 | 0           | 0           |
| 0 | -0.081928177 | 0 | 0           | 0 | 0.030675477  | 0 | 0           | 0           |
| 0 | 0            | 0 | 0.15385749  | 0 | -0.072207161 | 0 | 0           | -0.14968722 |

[illegible]

|   |              |   |             |   |              |   |              |   |             |
|---|--------------|---|-------------|---|--------------|---|--------------|---|-------------|
| 0 | 0            | 0 | 0           | 0 | 0            | 0 | -0.003117674 | 0 | 0           |
| 0 | 0            | 0 | 0           | 0 | -0.004497789 | 0 | 0            | 0 | 0           |
| 0 | 0            | 0 | 0           | 0 | 0            | 0 | 0            | 0 | 0           |
| 0 | 0            | 0 | 0           | 0 | 0            | 0 | -0.001686907 | 0 | 0           |
| 0 | -0.083891295 | 0 | 0.16764675  | 0 | -0.090355356 | 0 | 0            | 0 | 0           |
| 0 | -0.0846827   | 0 | 0.16676832  | 0 | -0.087741998 | 0 | 0            | 0 | 0           |
| 0 | -0.10415585  | 0 | 0.048699411 | 0 | 0            | 0 | 0            | 0 | 0           |
| 0 | -0.12771971  | 0 | 0           | 0 | -0.039787212 | 0 | 0            | 0 | 0           |
| 0 | -0.12819117  | 0 | 0           | 0 | -0.037804442 | 0 | 0            | 0 | 0           |
| 0 | -0.10350288  | 0 | 0.047208815 | 0 | 0            | 0 | 0            | 0 | 0           |
| 0 | 0            | 0 | 0           | 0 | 0            | 0 | 0.065669952  | 0 | -0.6266241  |
| 0 | 0            | 0 | 0           | 0 | 0            | 0 | 0.066941161  | 0 | -0.62643226 |
| 0 | -0.11989694  | 0 | 0           | 0 | 0            | 0 | 0            | 0 | 0           |
| 0 | -0.11888927  | 0 | 0           | 0 | 0            | 0 | 0            | 0 | 0           |
| 0 | -0.11753753  | 0 | 0           | 0 | 0            | 0 | 0            | 0 | 0           |
| 0 | -0.11947178  | 0 | 0           | 0 | 0            | 0 | 0            | 0 | 0           |
| 0 | 0            | 0 | 0.17313163  | 0 | -0.20534792  | 0 | 0            | 0 | -0.1522379  |
| 0 | -0.089501738 | 0 | 0.089957071 | 0 | 0            | 0 | 0            | 0 | 0           |
| 0 | -0.11629904  | 0 | 0           | 0 | 0            | 0 | 0            | 0 | 0           |
| 0 | -0.086984499 | 0 | 0.098345056 | 0 | 0            | 0 | 0            | 0 | 0           |
| 0 | -0.091504394 | 0 | 0.084424962 | 0 | 0            | 0 | 0.009161509  | 0 | 0           |
| 0 | -0.11965398  | 0 | 0           | 0 | 0            | 0 | 0.004399632  | 0 | 0           |
| 0 | -0.086771841 | 0 | 0.094873666 | 0 | 0            | 0 | 0            | 0 | 0           |
| 0 | 0            | 0 | 0           | 0 | 0.05798216   | 0 | 0            | 0 | -0.62649246 |
| 0 | 0            | 0 | 0           | 0 | 0.059628879  | 0 | 0            | 0 | -0.62649371 |
| 0 | -0.1186025   | 0 | 0           | 0 | 0            | 0 | 0.002817841  | 0 | 0           |
| 0 | -0.085846822 | 0 | 0.098022914 | 0 | 0            | 0 | 0            | 0 | 0           |
| 0 | 0            | 0 | 0           | 0 | 0.027757257  | 0 | 0.040585641  | 0 | -0.17533195 |
| 0 | 0            | 0 | 0           | 0 | 0.029085124  | 0 | 0.040738155  | 0 | -0.17542435 |
| 0 | -0.08558062  | 0 | 0.094158946 | 0 | 0            | 0 | 0            | 0 | 0           |
| 0 | -0.031825184 | 0 | 0           | 0 | 0            | 0 | 0.066806435  | 0 | -0.1447451  |
| 0 | -0.033464218 | 0 | 0           | 0 | 0            | 0 | 0.068209329  | 0 | -0.14325894 |
| 0 | -0.090455827 | 0 | 0.083919357 | 0 | 0            | 0 | 0.008026952  | 0 | 0           |
| 0 | 0            | 0 | 0.17388631  | 0 | -0.20611407  | 0 | 0            | 0 | 0           |
| 0 | 0            | 0 | 0           | 0 | 0            | 0 | 0.053909642  | 0 | -0.1796278  |
| 0 | 0            | 0 | 0           | 0 | 0            | 0 | 0.054914877  | 0 | -0.17982819 |
| 0 | 0            | 0 | 0           | 0 | 0            | 0 | 0            | 0 | -0.62648236 |
| 0 | 0            | 0 | 0.15879532  | 0 | -0.1534897   | 0 | 0.11802221   | 0 | -0.15612624 |
| 0 | 0            | 0 | 0           | 0 | 0            | 0 | 0            | 0 | -0.62647906 |
| 0 | 0            | 0 | 0           | 0 | 0            | 0 | 0.06539774   | 0 | -0.17473132 |
| 0 | 0            | 0 | 0           | 0 | 0            | 0 | 0.054214009  | 0 | -0.17476585 |
| 0 | 0            | 0 | 0           | 0 | 0            | 0 | 0.054828522  | 0 | -0.1748415  |
| 0 | 0            | 0 | 0           | 0 | 0.045344758  | 0 | 0            | 0 | -0.18241181 |
| 0 | 0            | 0 | 0           | 0 | 0.046799495  | 0 | 0            | 0 | -0.18257856 |
| 0 | -0.037744976 | 0 | 0           | 0 | 0            | 0 | 0.06834629   | 0 | 0           |
| 0 | -0.036080574 | 0 | 0           | 0 | 0            | 0 | 0.066936095  | 0 | 0           |
| 0 | 0            | 0 | 0           | 0 | 0.028320706  | 0 | 0.039959204  | 0 | 0           |



[illegible]

|   |              |   |             |   |              |   |             |   |
|---|--------------|---|-------------|---|--------------|---|-------------|---|
| 0 | 0            | 0 | 0.090808886 | 0 | -0.082786169 | 0 | 0           | 0 |
| 0 | 0            | 0 | 0           | 0 | -0.058284599 | 0 | 0.060786977 | 0 |
| 0 | -0.10565141  | 0 | 0.18903489  | 0 | -0.29468816  | 0 | 0           | 0 |
| 0 | 0            | 0 | 0           | 0 | -0.057944834 | 0 | 0.060214789 | 0 |
| 0 | 0            | 0 | 0           | 0 | -0.030801957 | 0 | 0           | 0 |
| 0 | 0            | 0 | 0           | 0 | 0            | 0 | 0.072580042 | 0 |
| 0 | 0            | 0 | 0           | 0 | 0            | 0 | 0.030883011 | 0 |
| 0 | 0            | 0 | 0.02579525  | 0 | 0            | 0 | 0           | 0 |
| 0 | 0            | 0 | 0           | 0 | -0.05346614  | 0 | 0           | 0 |
| 0 | 0.042098919  | 0 | 0.044068508 | 0 | 0            | 0 | 0           | 0 |
| 0 | 0.0184934    | 0 | 0           | 0 | 0            | 0 | 0           | 0 |
| 0 | 0            | 0 | 0           | 0 | -0.037397631 | 0 | 0           | 0 |
| 0 | 0            | 0 | 0           | 0 | 0            | 0 | 0.071324363 | 0 |
| 0 | 0            | 0 | 0           | 0 | 0            | 0 | 0           | 0 |
| 0 | 0            | 0 | 0           | 0 | 0            | 0 | 0           | 0 |
| 0 | 0            | 0 | 0.021750679 | 0 | 0            | 0 | 0.026860693 | 0 |
| 0 | 0.004115706  | 0 | 0           | 0 | -0.029369156 | 0 | 0           | 0 |
| 0 | -0.11549514  | 0 | 0           | 0 | 0            | 0 | 0.072861281 | 0 |
| 0 | -0.11852976  | 0 | 0           | 0 | -0.013870667 | 0 | 0.086226924 | 0 |
| 0 | -0.11590161  | 0 | 0           | 0 | 0            | 0 | 0.058299032 | 0 |
| 0 | 0.015365886  | 0 | 0           | 0 | 0            | 0 | 0.028224428 | 0 |
| 0 | -0.021636196 | 0 | 0           | 0 | 0            | 0 | 0           | 0 |
| 0 | -0.11637917  | 0 | 0           | 0 | 0            | 0 | 0.071400656 | 0 |
| 0 | 0            | 0 | 0           | 0 | 0            | 0 | 0.033665498 | 0 |
| 0 | 0            | 0 | 0           | 0 | -0.053523792 | 0 | 0           | 0 |
| 0 | -0.11781179  | 0 | 0           | 0 | -0.015366765 | 0 | 0.086139167 | 0 |
| 0 | -0.11481333  | 0 | 0           | 0 | 0            | 0 | 0.057745016 | 0 |
| 0 | 0            | 0 | 0           | 0 | 0            | 0 | 0           | 0 |
| 0 | -0.11516548  | 0 | 0           | 0 | 0            | 0 | 0.070492873 | 0 |
| 0 | 0            | 0 | 0.027136622 | 0 | 0            | 0 | 0           | 0 |
| 0 | 0            | 0 | 0.025454288 | 0 | 0            | 0 | 0           | 0 |
| 0 | 0            | 0 | 0           | 0 | -0.037027702 | 0 | 0           | 0 |
| 0 | 0.037873113  | 0 | 0.042918513 | 0 | 0            | 0 | 0           | 0 |
| 0 | -0.022771253 | 0 | 0           | 0 | 0            | 0 | 0           | 0 |
| 0 | 0            | 0 | 0.12986499  | 0 | 0            | 0 | 0           | 0 |
| 0 | 0            | 0 | 0.13040594  | 0 | 0            | 0 | 0           | 0 |
| 0 | 0            | 0 | 0.12038341  | 0 | 0            | 0 | 0           | 0 |
| 0 | 0            | 0 | 0.10841124  | 0 | 0            | 0 | 0           | 0 |
| 0 | 0            | 0 | 0.10689914  | 0 | 0            | 0 | 0           | 0 |
| 0 | 0            | 0 | 0.022470301 | 0 | 0            | 0 | 0.026396488 | 0 |
| 0 | 0            | 0 | 0.11571336  | 0 | 0            | 0 | 0           | 0 |
| 0 | 0            | 0 | 0.12779422  | 0 | 0            | 0 | 0.033627911 | 0 |
| 0 | 0            | 0 | 0.1169025   | 0 | 0            | 0 | 0           | 0 |
| 0 | 0.018882366  | 0 | 0           | 0 | 0            | 0 | 0           | 0 |
| 0 | 0.019688816  | 0 | 0           | 0 | 0            | 0 | 0           | 0 |
| 0 | 0            | 0 | 0.12729099  | 0 | 0            | 0 | 0.032957024 | 0 |
| 0 | 0            | 0 | 0.1177854   | 0 | 0            | 0 | 0.007042477 | 0 |

|   |              |   |             |   |              |   |              |             |
|---|--------------|---|-------------|---|--------------|---|--------------|-------------|
| 0 | -0.1243571   | 0 | 0           | 0 | -0.03935538  | 0 | 0            | 0           |
| 0 | 0            | 0 | 0.11731389  | 0 | 0            | 0 | 0.006443576  | 0           |
| 0 | -4.74E-05    | 0 | 0           | 0 | -0.030598955 | 0 | 0            | 0           |
| 0 | -0.12373526  | 0 | 0           | 0 | -0.041173942 | 0 | 0            | 0           |
| 0 | 0            | 0 | 0.13049362  | 0 | 0            | 0 | 0            | 0           |
| 0 | 0            | 0 | 0           | 0 | 0            | 0 | 0            | -0.19245468 |
| 0 | 0.011689845  | 0 | 0           | 0 | 0            | 0 | 0.028175009  | 0           |
| 0 | 0            | 0 | 0           | 0 | 0            | 0 | 0.033586737  | 0           |
| 0 | -0.11568954  | 0 | 0           | 0 | 0            | 0 | 0            | 0           |
| 0 | 0            | 0 | 0.027750638 | 0 | 0            | 0 | 0            | 0           |
| 0 | 0            | 0 | 0.026157321 | 0 | 0            | 0 | 0            | 0           |
| 0 | 0.084839464  | 0 | 0.16493063  | 0 | -0.060488277 | 0 | 0            | -0.24185925 |
| 0 | -0.021487087 | 0 | 0           | 0 | 0            | 0 | 0            | -0.15791891 |
| 0 | -0.11655187  | 0 | 0           | 0 | 0            | 0 | 0            | 0           |
| 0 | 0            | 0 | 0.16358862  | 0 | -0.10494935  | 0 | 0            | -0.18132426 |
| 0 | -0.11532275  | 0 | 0           | 0 | 0            | 0 | 0            | 0           |
| 0 | 0.062164104  | 0 | 0.080657679 | 0 | 0            | 0 | 0.043168357  | -0.23142378 |
| 0 | 0.015317111  | 0 | 0           | 0 | 0            | 0 | 0            | 0           |
| 0 | 0.016039867  | 0 | 0           | 0 | 0            | 0 | 0            | 0           |
| 0 | 0            | 0 | 0           | 0 | 0            | 0 | 0            | 0           |
| 0 | -0.025576547 | 0 | 0           | 0 | 0            | 0 | 0            | 0           |
| 0 | 0            | 0 | 0.11328446  | 0 | 0            | 0 | -0.016919555 | 0           |
| 0 | 0            | 0 | 0.10926888  | 0 | 0            | 0 | -0.018264156 | 0           |
| 0 | 0            | 0 | 0.16437525  | 0 | -0.10512476  | 0 | 0            | 0           |
| 0 | 0            | 0 | 0.10798188  | 0 | 0            | 0 | -0.019762287 | 0           |
| 0 | 0            | 0 | 0.10429887  | 0 | 0            | 0 | 0            | 0           |
| 0 | 0.081372831  | 0 | 0.16577713  | 0 | -0.061259551 | 0 | 0            | 0           |
| 0 | 0.086808493  | 0 | 0.1123484   | 0 | 0            | 0 | 0            | -0.62720964 |
| 0 | 0            | 0 | 0.063310106 | 0 | 0            | 0 | 0.064044716  | -0.6264955  |
| 0 | 0.058235984  | 0 | 0.080387273 | 0 | 0            | 0 | 0.043783261  | 0           |
| 0 | -0.086026724 | 0 | 0.1735034   | 0 | -0.2040494   | 0 | 0.1622495    | 0           |
| 0 | 0.079356546  | 0 | 0.10144373  | 0 | 0            | 0 | 0            | -0.25185536 |
| 0 | 0.074873174  | 0 | 0.095327348 | 0 | 0            | 0 | 0            | -0.24258992 |
| 0 | 0            | 0 | 0.068347819 | 0 | 0            | 0 | 0.080116546  | -0.17595266 |
| 0 | 0            | 0 | 0.063480615 | 0 | 0            | 0 | 0.061522191  | -0.17732261 |
| 0 | -0.11231339  | 0 | 0           | 0 | 0.035041037  | 0 | 0            | 0           |
| 0 | -0.11133831  | 0 | 0           | 0 | 0.033443539  | 0 | 0            | 0           |
| 0 | 0.07067058   | 0 | 0.09447409  | 0 | 0            | 0 | 0            | 0           |
| 0 | 0.075820249  | 0 | 0.10160061  | 0 | 0            | 0 | 0            | 0           |
| 0 | -0.10365887  | 0 | 0           | 0 | 0.051010138  | 0 | 0            | 0           |
| 0 | 0            | 0 | 0.068817499 | 0 | 0            | 0 | 0.078889893  | 0           |
| 0 | 0            | 0 | 0.064221491 | 0 | 0            | 0 | 0.061395749  | 0           |
| 0 | 0            | 0 | 0.071819679 | 0 | 0            | 0 | 0            | -0.62608784 |
| 0 | -0.1233359   | 0 | 0           | 0 | 0            | 0 | 0            | 0           |
| 0 | 0            | 0 | 0.1651496   | 0 | -0.064917236 | 0 | 0            | -0.62617792 |
| 0 | -0.12727445  | 0 | 0           | 0 | -0.12126463  | 0 | 0.11031692   | 0           |
| 0 | 0            | 0 | 0.088280454 | 0 | 0            | 0 | 0            | -0.62618844 |

|   |              |   |             |   |              |   |             |             |
|---|--------------|---|-------------|---|--------------|---|-------------|-------------|
| 0 | 0            | 0 | 0.071349695 | 0 | 0            | 0 | 0           | -0.18117414 |
| 0 | 0            | 0 | 0.071783986 | 0 | 0            | 0 | 0           | 0           |
| 0 | 0            | 0 | 0           | 0 | -0.023691512 | 0 | 0.12479342  | -0.62673065 |
| 0 | -0.13312647  | 0 | 0           | 0 | -0.14793546  | 0 | 0           | 0           |
| 0 | 0.021417749  | 0 | 0           | 0 | 0            | 0 | 0.10350505  | -0.62759588 |
| 0 | 0            | 0 | 0           | 0 | 0            | 0 | 0.097112428 | -0.62642153 |
| 0 | 0            | 0 | 0           | 0 | 0            | 0 | 0.090580833 | -0.62663109 |
| 0 | 0            | 0 | 0           | 0 | -0.047571147 | 0 | 0.086211533 | -0.18250913 |
| 0 | 0            | 0 | 0           | 0 | -0.027741098 | 0 | 0.11311204  | -0.1898922  |
| 0 | 0            | 0 | 0           | 0 | -0.047686107 | 0 | 0.084986211 | 0           |
| 0 | 0            | 0 | 0.20189618  | 0 | -0.23968939  | 0 | 0.060798413 | 0           |
| 0 | 0.012490036  | 0 | 0           | 0 | -0.017484216 | 0 | 0.11764361  | -0.19573987 |
| 0 | 0.022093851  | 0 | 0           | 0 | 0            | 0 | 0.093158153 | -0.20959967 |
| 0 | 0.021840887  | 0 | 0           | 0 | 0            | 0 | 0.085923181 | -0.2051119  |
| 0 | 0            | 0 | 0           | 0 | 0            | 0 | 0.086341099 | -0.1883339  |
| 0 | 0            | 0 | 0           | 0 | 0            | 0 | 0.025991135 | 0           |
| 0 | 0            | 0 | 0           | 0 | -0.027110218 | 0 | 0.11301057  | 0           |
| 0 | 0            | 0 | 0           | 0 | 0            | 0 | 0.027397707 | 0           |
| 0 | 0            | 0 | 0.20795242  | 0 | -0.24586932  | 0 | 0           | 0           |
| 0 | 0            | 0 | 0           | 0 | 0.011760359  | 0 | 0           | 0           |
| 0 | 0            | 0 | 0           | 0 | -0.050135412 | 0 | 0           | -0.62629858 |
| 0 | 0            | 0 | 0           | 0 | 0            | 0 | 0           | 0           |
| 0 | 0.00761215   | 0 | 0           | 0 | -0.01901882  | 0 | 0.11943259  | 0           |
| 0 | 0            | 0 | 0           | 0 | 0            | 0 | 0           | 0           |
| 0 | 0            | 0 | 0           | 0 | 0.013409854  | 0 | 0           | 0           |
| 0 | 0.018134975  | 0 | 0           | 0 | 0            | 0 | 0.093920454 | 0           |
| 0 | 0.017893757  | 0 | 0           | 0 | 0            | 0 | 0.084928884 | 0           |
| 0 | 0            | 0 | 0           | 0 | 0            | 0 | 0.085230037 | 0           |
| 0 | 0            | 0 | 0           | 0 | 0            | 0 | 0           | 0           |
| 0 | 0            | 0 | 0           | 0 | 0            | 0 | 0.045530843 | 0           |
| 0 | 0            | 0 | 0           | 0 | 0            | 0 | 0.046384919 | 0           |
| 0 | 0            | 0 | 0.21748197  | 0 | -0.25485338  | 0 | 0           | 0           |
| 0 | 0            | 0 | 0           | 0 | 0.026726863  | 0 | 0           | 0           |
| 0 | 0            | 0 | 0           | 0 | -0.050008831 | 0 | 0           | -0.18926013 |
| 0 | 0            | 0 | 0           | 0 | 0.028232229  | 0 | 0           | 0           |
| 0 | 0.026103832  | 0 | 0           | 0 | 0            | 0 | 0           | -0.62659036 |
| 0 | 0            | 0 | 0           | 0 | 0            | 0 | 0           | 0           |
| 0 | -0.004358879 | 0 | 0           | 0 | -0.052769972 | 0 | 0           | -0.17980893 |
| 0 | 0            | 0 | 0           | 0 | 0            | 0 | 0           | -0.62609291 |
| 0 | -0.090527107 | 0 | 0.086290059 | 0 | -0.10974023  | 0 | 0           | 0           |
| 0 | 0            | 0 | 0           | 0 | 0            | 0 | 0.004772114 | 0           |
| 0 | 0            | 0 | 0           | 0 | -0.002896954 | 0 | 0           | 0           |
| 0 | 0            | 0 | 0           | 0 | -0.009265186 | 0 | 0.010319012 | 0           |
| 0 | 0            | 0 | 0           | 0 | -0.007994788 | 0 | 0.01109554  | 0           |
| 0 | 0            | 0 | 0.17418956  | 0 | -0.18195046  | 0 | 0.11207529  | 0           |
| 0 | 0            | 0 | 0           | 0 | -0.05006766  | 0 | 0           | 0           |
| 0 | 0.026766508  | 0 | 0           | 0 | 0            | 0 | 0           | -0.21633843 |

|   |              |   |              |   |              |   |             |   |             |
|---|--------------|---|--------------|---|--------------|---|-------------|---|-------------|
| 0 | -0.010256404 | 0 | 0            | 0 | -0.056826155 | 0 | 0           | 0 | 0           |
| 0 | 0            | 0 | 0.19237266   | 0 | -0.18389963  | 0 | 0.13418432  | 0 | 0           |
| 0 | 0.023085834  | 0 | 0            | 0 | 0            | 0 | 0           | 0 | 0           |
| 0 | -0.11552763  | 0 | 0            | 0 | -0.07541661  | 0 | 0           | 0 | 0           |
| 0 | -0.093870016 | 0 | 0            | 0 | 0            | 0 | 0.08486439  | 0 | 0           |
| 0 | -0.088735365 | 0 | 0            | 0 | 0            | 0 | 0.059703554 | 0 | 0           |
| 0 | 0.062249754  | 0 | 0            | 0 | 0.047334274  | 0 | 0           | 0 | -0.26285083 |
| 0 | -0.12624559  | 0 | 0            | 0 | -0.13707981  | 0 | 0.096781057 | 0 | 0           |
| 0 | 0            | 0 | 0            | 0 | 0.032480924  | 0 | 0.060356928 | 0 | 0           |
| 0 | 0            | 0 | 0            | 0 | 0.033819211  | 0 | 0.060587184 | 0 | 0           |
| 0 | -0.096539119 | 0 | -0.007710943 | 0 | 0            | 0 | 0.046131615 | 0 | 0           |
| 0 | 0            | 0 | 0            | 0 | 0            | 0 | 0.062426726 | 0 | 0           |
| 0 | 0            | 0 | 0            | 0 | 0            | 0 | 0.063105602 | 0 | 0           |
| 0 | 0.058468754  | 0 | 0            | 0 | 0.047061891  | 0 | 0           | 0 | 0           |
| 0 | 0            | 0 | 0            | 0 | 0.033199145  | 0 | 0           | 0 | -0.62652407 |
| 0 | 0            | 0 | 0            | 0 | 0            | 0 | 0.084481707 | 0 | 0           |
| 0 | 0            | 0 | 0            | 0 | 0.025210611  | 0 | 0.046647857 | 0 | 0           |
| 0 | 0.083774924  | 0 | 0            | 0 | 0.079805237  | 0 | 0           | 0 | -0.62677224 |
| 0 | 0            | 0 | 0            | 0 | 0.032389597  | 0 | 0.055957163 | 0 | 0           |
| 0 | 0            | 0 | 0            | 0 | 0.034122107  | 0 | 0.056560424 | 0 | 0           |
| 0 | 0.041325089  | 0 | 0            | 0 | 0            | 0 | 0           | 0 | -0.627371   |
| 0 | 0            | 0 | 0            | 0 | 0            | 0 | 0.057928174 | 0 | 0           |
| 0 | 0            | 0 | 0            | 0 | 0.035859449  | 0 | 0           | 0 | 0           |
| 0 | 0            | 0 | 0            | 0 | 0.037635479  | 0 | 0           | 0 | 0           |
| 0 | -0.089604766 | 0 | 0            | 0 | 0            | 0 | 0           | 0 | 0           |
| 0 | 0            | 0 | 0            | 0 | 0.037452766  | 0 | 0           | 0 | 0           |
| 0 | 0            | 0 | 0            | 0 | 0            | 0 | 0           | 0 | 0           |
| 0 | 0            | 0 | 0            | 0 | 0.068911445  | 0 | 0           | 0 | 0           |
| 0 | -0.089076307 | 0 | 0.004379903  | 0 | 0            | 0 | 0           | 0 | 0           |
| 0 | -0.092577881 | 0 | -8.62E-05    | 0 | 0            | 0 | 0           | 0 | 0           |
| 0 | 0            | 0 | 0.13988226   | 0 | -0.11339095  | 0 | 0           | 0 | 0           |
| 0 | -0.12540281  | 0 | 0            | 0 | -0.13934481  | 0 | 0           | 0 | 0           |
| 0 | -0.11031325  | 0 | 0            | 0 | -0.074841658 | 0 | 0.1732898   | 0 | 0           |
| 0 | -0.062041924 | 0 | 0.19194519   | 0 | -0.12896464  | 0 | 0           | 0 | 0           |
| 0 | -0.066087456 | 0 | 0.058485543  | 0 | 0            | 0 | 0.095288676 | 0 | 0           |
| 0 | -0.070181467 | 0 | 0.056623911  | 0 | 0            | 0 | 0.092232522 | 0 | 0           |
| 0 | 0            | 0 | 0            | 0 | -0.057212054 | 0 | 0.090396791 | 0 | 0           |
| 0 | 0            | 0 | 0.048393644  | 0 | 0            | 0 | 0.057675352 | 0 | 0           |
| 0 | 0            | 0 | 0            | 0 | -0.063727778 | 0 | 0.077672844 | 0 | 0           |
| 0 | 0            | 0 | 0.052951348  | 0 | 0            | 0 | 0.078254294 | 0 | 0           |
| 0 | -0.086290985 | 0 | 0            | 0 | 0            | 0 | 0.10225009  | 0 | 0           |
| 0 | 0            | 0 | 0            | 0 | 0            | 0 | 0.085972907 | 0 | 0           |
| 0 | -0.063489089 | 0 | 0.063647353  | 0 | 0            | 0 | 0           | 0 | 0           |
| 0 | 0            | 0 | 0            | 0 | -0.064933389 | 0 | 0           | 0 | 0           |
| 0 | 0            | 0 | 0.053079668  | 0 | 0            | 0 | 0           | 0 | 0           |
| 0 | 0            | 0 | 0.085237407  | 0 | 0            | 0 | 0.089853809 | 0 | 0           |
| 0 | 0            | 0 | 0            | 0 | -0.058718554 | 0 | 0.097660633 | 0 | 0           |

|   |              |   |             |   |              |   |              |   |             |
|---|--------------|---|-------------|---|--------------|---|--------------|---|-------------|
| 0 | 0            | 0 | 0.15402666  | 0 | -0.072379207 | 0 | 0            | 0 | -0.62638585 |
| 0 | 0            | 0 | 0.15341036  | 0 | -0.070264284 | 0 | 0            | 0 | -0.62624505 |
| 0 | 0            | 0 | 0.15321901  | 0 | -0.10019736  | 0 | 0.038283881  | 0 | -0.14859464 |
| 0 | 0            | 0 | 0.15268502  | 0 | -0.098603411 | 0 | 0.038672312  | 0 | -0.14879181 |
| 0 | 0            | 0 | 0.13054777  | 0 | -0.077270733 | 0 | 0            | 0 | -0.15412705 |
| 0 | 0            | 0 | 0.1302146   | 0 | -0.075240851 | 0 | 0            | 0 | -0.15430806 |
| 0 | 0            | 0 | 0.1573025   | 0 | -0.10877991  | 0 | 0            | 0 | -0.14799994 |
| 0 | 0            | 0 | 0.1567666   | 0 | -0.10691286  | 0 | 0            | 0 | -0.14822415 |
| 0 | 0            | 0 | 0.15384984  | 0 | -0.084870491 | 0 | 0            | 0 | -0.15547202 |
| 0 | 0            | 0 | 0.15326405  | 0 | -0.082978164 | 0 | 0            | 0 | -0.15577706 |
| 0 | 0            | 0 | 0.15402658  | 0 | -0.10042232  | 0 | 0.037773969  | 0 | 0           |
| 0 | 0            | 0 | 0.15348991  | 0 | -0.098814007 | 0 | 0.038156807  | 0 | 0           |
| 0 | 0            | 0 | 0.13164717  | 0 | -0.077771687 | 0 | 0            | 0 | 0           |
| 0 | 0            | 0 | 0.15353836  | 0 | -0.071364357 | 0 | 0            | 0 | -0.14966567 |
| 0 | 0            | 0 | 0.13131243  | 0 | -0.075737215 | 0 | 0            | 0 | 0           |
| 0 | 0.002078891  | 0 | 0.15390561  | 0 | -0.072074398 | 0 | 0            | 0 | -0.15163027 |
| 0 | 0            | 0 | 0.1580766   | 0 | -0.10958595  | 0 | 0            | 0 | 0           |
| 0 | 0.001195607  | 0 | 0.15328244  | 0 | -0.069999967 | 0 | 0            | 0 | -0.15104456 |
| 0 | 0            | 0 | 0.15754163  | 0 | -0.10771292  | 0 | 0            | 0 | 0           |
| 0 | 0            | 0 | 0.15462541  | 0 | -0.085016007 | 0 | 0            | 0 | 0           |
| 0 | 0            | 0 | 0.15385673  | 0 | -0.082787518 | 0 | 0            | 0 | 0           |
| 0 | 0            | 0 | 0.1543037   | 0 | -0.071931949 | 0 | 0            | 0 | 0           |
| 0 | -0.001895897 | 0 | 0.1545779   | 0 | -0.072896415 | 0 | 0            | 0 | 0           |
| 0 | -0.00278809  | 0 | 0.15394366  | 0 | -0.070802852 | 0 | 0            | 0 | 0           |
| 0 | 0            | 0 | 0.083892075 | 0 | 0            | 0 | 0            | 0 | -0.16371858 |
| 0 | 0            | 0 | 0.084915808 | 0 | 0            | 0 | 0            | 0 | -0.16360018 |
| 0 | 0            | 0 | 0.11120378  | 0 | 0            | 0 | 0            | 0 | -0.62626469 |
| 0 | 0            | 0 | 0.11069517  | 0 | 0            | 0 | 0            | 0 | -0.62626364 |
| 0 | 0            | 0 | 0.072811259 | 0 | 0            | 0 | 0            | 0 | -0.6262919  |
| 0 | 0            | 0 | 0.071349497 | 0 | 0            | 0 | 0            | 0 | -0.62628944 |
| 0 | 0            | 0 | 0.084613083 | 0 | 0            | 0 | 0            | 0 | 0           |
| 0 | 0            | 0 | 0.091658857 | 0 | 0            | 0 | 0            | 0 | -0.62638116 |
| 0 | 0            | 0 | 0.085635383 | 0 | 0            | 0 | 0            | 0 | 0           |
| 0 | 0            | 0 | 0.095807807 | 0 | 0            | 0 | -0.005346203 | 0 | -0.62605358 |
| 0 | 0            | 0 | 0.094048599 | 0 | 0            | 0 | 0            | 0 | -0.62638482 |
| 0 | 0.004545789  | 0 | 0.092659951 | 0 | 0            | 0 | 0            | 0 | -0.62674683 |
| 0 | 0            | 0 | 0.095200122 | 0 | 0            | 0 | -0.006287381 | 0 | -0.62607479 |
| 0 | 0            | 0 | 0.093196734 | 0 | 0            | 0 | 0            | 0 | -0.62626426 |
| 0 | 0.005847131  | 0 | 0.091574721 | 0 | 0            | 0 | 0            | 0 | -0.62675549 |
| 0 | 0            | 0 | 0.10855527  | 0 | 0            | 0 | 0.03413963   | 0 | -0.15781208 |
| 0 | 0            | 0 | 0.10809258  | 0 | 0            | 0 | 0.033568925  | 0 | -0.15782564 |
| 0 | 0            | 0 | 0.11127383  | 0 | 0            | 0 | 0            | 0 | -0.15751317 |
| 0 | 0.019930177  | 0 | 0.11581051  | 0 | 0            | 0 | 0            | 0 | -0.17569257 |
| 0 | 0            | 0 | 0.11059234  | 0 | 0            | 0 | 0            | 0 | -0.1621884  |
| 0 | 0.018049857  | 0 | 0.115788    | 0 | 0            | 0 | 0            | 0 | -0.17400137 |
| 0 | 0            | 0 | 0.11009623  | 0 | 0            | 0 | 0            | 0 | -0.16209298 |
| 0 | 0            | 0 | 0.07731268  | 0 | 0            | 0 | -0.017901933 | 0 | -0.16369161 |



|   |              |   |            |   |              |              |             |             |
|---|--------------|---|------------|---|--------------|--------------|-------------|-------------|
| 0 | 0            | 0 | 0          | 0 | 0            | 0.04117954   | 0           | -0.17829424 |
| 0 | 0            | 0 | 0          | 0 | 0            | 0            | 0           | -0.62625659 |
| 0 | -0.037403256 | 0 | 0          | 0 | 0            | 0            | 0           | -0.14349098 |
| 0 | 0            | 0 | 0          | 0 | -0.006237159 | 0            | 0           | -0.62636811 |
| 0 | 0            | 0 | 0          | 0 | 0            | 0            | 0           | -0.62649035 |
| 0 | 0            | 0 | 0          | 0 | 0            | -0.001612726 | 0           | -0.62650171 |
| 0 | 0            | 0 | 0          | 0 | 0            | 0.041935909  | 0           | -0.17836496 |
| 0 | 0            | 0 | 0          | 0 | -0.00465896  | 0            | 0           | -0.62636705 |
| 0 | 0            | 0 | 0          | 0 | 0            | 0            | 0           | -0.62649769 |
| 0 | 0            | 0 | 0          | 0 | 0            | -0.000198661 | 0           | -0.62635678 |
| 0 | 0            | 0 | 0          | 0 | 0.032269567  | 0            | 0           | -0.17931126 |
| 0 | -0.045527608 | 0 | 0          | 0 | -0.01841317  | 0            | 0           | -0.13482899 |
| 0 | 0            | 0 | 0          | 0 | 0.033731681  | 0            | 0           | -0.17941357 |
| 0 | -0.046200962 | 0 | 0          | 0 | -0.016846952 | 0            | 0           | -0.13429127 |
| 0 | -0.10228176  | 0 | 0.12179398 | 0 | -0.099367755 | 0            | 0           | 0           |
| 0 | -0.038087464 | 0 | 0          | 0 | 0            | 0            | 0           | -0.14143641 |
| 0 | -0.10288059  | 0 | 0.12121021 | 0 | -0.096934583 | 0            | 0           | 0           |
| 0 | -0.039880886 | 0 | 0          | 0 | 0            | 0            | 0           | 0           |
| 0 | 0            | 0 | 0          | 0 | 0            | 0            | 0           | -0.18218031 |
| 0 | -0.036684003 | 0 | 0          | 0 | 0            | 0            | 0           | -0.14186431 |
| 0 | 0            | 0 | 0          | 0 | 0            | 0            | 0           | -0.17865682 |
| 0 | -0.036747506 | 0 | 0          | 0 | 0            | -0.001805905 | 0           | -0.14283707 |
| 0 | -0.038220171 | 0 | 0          | 0 | 0            | 0            | 0           | -0.14079884 |
| 0 | -0.038315093 | 0 | 0          | 0 | 0            | -0.000295214 | 0           | -0.14140461 |
| 0 | -0.04140035  | 0 | 0          | 0 | 0            | 0            | 0           | 0           |
| 0 | 0            | 0 | 0          | 0 | 0            | 0            | 0           | -0.1823826  |
| 0 | 0            | 0 | 0          | 0 | 0            | 0.039944551  | 0           | 0           |
| 0 | -0.049946237 | 0 | 0          | 0 | -0.019512455 | 0            | 0           | 0           |
| 0 | -0.050627061 | 0 | 0          | 0 | -0.017930293 | 0            | 0           | 0           |
| 0 | 0            | 0 | 0          | 0 | 0            | 0.040702581  | 0           | 0           |
| 0 | 0            | 0 | 0          | 0 | 0.032213676  | 0            | 0           | 0           |
| 0 | -0.042050522 | 0 | 0          | 0 | 0            | 0            | 0           | 0           |
| 0 | 0            | 0 | 0          | 0 | 0.033676778  | 0            | 0           | 0           |
| 0 | -0.040594185 | 0 | 0          | 0 | 0            | 0            | 0           | 0           |
| 0 | -0.040670616 | 0 | 0          | 0 | 0            | -0.001990201 | 0           | 0           |
| 0 | -0.042155146 | 0 | 0          | 0 | 0            | 0            | 0           | 0           |
| 0 | -0.042262436 | 0 | 0          | 0 | 0            | -0.000467017 | 0           | 0           |
| 0 | 0            | 0 | 0          | 0 | -0.005346922 | 0            | 0           | -0.17744464 |
| 0 | 0            | 0 | 0          | 0 | 0            | 0            | 0           | -0.17629025 |
| 0 | 0            | 0 | 0          | 0 | 0            | -0.002483326 | 0           | -0.17745857 |
| 0 | 0            | 0 | 0          | 0 | -0.00523962  | 0            | 0           | -0.17686977 |
| 0 | 0            | 0 | 0          | 0 | -0.007144863 | 0            | 0.001805    | -0.17744322 |
| 0 | 0            | 0 | 0          | 0 | 0            | 0            | 0           | 0           |
| 0 | 0            | 0 | 0          | 0 | 0            | -0.000731473 | 0           | -0.1763655  |
| 0 | 0            | 0 | 0          | 0 | 0            | 0            | 0           | 0           |
| 0 | 0            | 0 | 0          | 0 | -0.005929871 | 0            | 0.002462651 | -0.17753357 |
| 0 | 0            | 0 | 0          | 0 | -0.00382981  | 0            | 0           | -0.17708766 |



|   |              |   |             |   |              |              |              |              |             |             |
|---|--------------|---|-------------|---|--------------|--------------|--------------|--------------|-------------|-------------|
| 0 | 0            | 0 | 0           | 0 | 0            | 0            | 0            | 0.000476171  | 0           | -0.17657891 |
| 0 | 0            | 0 | 0           | 0 | 0            | 0            | 0            | 0            | 0           | 0           |
| 0 | 0            | 0 | 0           | 0 | 0            | -0.005239554 | 0            | 0            | 0           | 0           |
| 0 | 0            | 0 | 0           | 0 | 0            | 0            | 0            | 0            | 0           | 0           |
| 0 | 0            | 0 | 0           | 0 | 0            | 0            | 0            | -0.002926215 | 0           | 0           |
| 0 | 0            | 0 | 0           | 0 | 0            | -0.004808107 | 0            | 0            | 0           | 0           |
| 0 | 0            | 0 | 0           | 0 | 0            | -0.006658188 | 0            | 0.001098868  | 0           | 0           |
| 0 | 0            | 0 | 0           | 0 | 0            | 0            | 0            | -0.00082354  | 0           | 0           |
| 0 | 0            | 0 | 0           | 0 | 0            | -0.003391098 | 0            | 0            | 0           | 0           |
| 0 | 0            | 0 | 0           | 0 | 0            | -0.005430529 | 0            | 0.00175522   | 0           | 0           |
| 0 | 0            | 0 | 0           | 0 | 0            | 0            | 0            | 0.000392308  | 0           | 0           |
| 0 | -0.091986683 | 0 | 0.16731644  | 0 | -0.10589753  | 0            | 0            | 0            | 0           | 0           |
| 0 | -0.092942717 | 0 | 0.16644272  | 0 | -0.10366829  | 0            | 0            | 0            | 0           | 0           |
| 0 | -0.08461515  | 0 | 0.16704098  | 0 | -0.089116663 | 0            | 0            | 0            | 0           | 0           |
| 0 | -0.10098028  | 0 | 0.059657185 | 0 | 0            | 0            | 0            | 0            | 0           | 0           |
| 0 | -0.13340443  | 0 | 0           | 0 | -0.062625049 | 0            | 0.043695883  | 0            | 0           | 0           |
| 0 | -0.13287918  | 0 | 0           | 0 | -0.064101095 | 0            | 0.043142707  | 0            | 0           | 0           |
| 0 | -0.10017184  | 0 | 0.058723487 | 0 | 0            | 0            | 0            | 0            | 0           | 0           |
| 0 | -0.099504817 | 0 | 0.053006559 | 0 | 0            | 0            | 0            | 0            | 0           | 0           |
| 0 | -0.09857396  | 0 | 0.051803807 | 0 | 0            | 0            | 0            | 0            | 0           | 0           |
| 0 | 0            | 0 | 0.16682905  | 0 | -0.19805619  | 0            | 0.061217001  | 0            | -0.15240364 | 0           |
| 0 | -0.10398874  | 0 | 0.048523149 | 0 | 0            | 0            | 0            | 0            | 0           | 0           |
| 0 | -0.12811783  | 0 | 0           | 0 | -0.03858715  | 0            | 0            | 0            | 0           | 0           |
| 0 | -0.1311288   | 0 | 0           | 0 | -0.055727652 | 0            | 0            | 0            | 0           | 0           |
| 0 | -0.13163829  | 0 | 0           | 0 | -0.054157046 | 0            | 0            | 0            | 0           | 0           |
| 0 | -0.1035535   | 0 | 0.050722685 | 0 | 0            | 0            | -0.006649947 | 0            | 0           | 0           |
| 0 | 0            | 0 | 0.17332146  | 0 | -0.20583441  | 0            | 0            | 0            | -0.62617614 | 0           |
| 0 | -0.12843379  | 0 | 0           | 0 | -0.041014223 | 0            | 0            | 0            | 0           | 0           |
| 0 | -0.12907279  | 0 | 0           | 0 | -0.039316269 | 0            | 0            | 0            | 0           | 0           |
| 0 | -0.10277976  | 0 | 0.049655743 | 0 | 0            | 0            | -0.008093355 | 0            | 0           | 0           |
| 0 | -0.034724087 | 0 | 0           | 0 | 0            | 0            | 0.068816456  | 0            | -0.62687549 | 0           |
| 0 | -0.033070241 | 0 | 0           | 0 | 0            | 0            | 0.067410574  | 0            | -0.62688295 | 0           |
| 0 | -0.11980456  | 0 | 0           | 0 | 0            | 0            | 0.045311438  | 0            | 0           | 0           |
| 0 | 0            | 0 | 0.12123021  | 0 | -0.14023434  | 0            | 0.08815111   | 0            | -0.16332697 | 0           |
| 0 | 0            | 0 | 0           | 0 | 0.026582249  | 0            | 0.042178687  | 0            | -0.62658854 | 0           |
| 0 | 0            | 0 | 0           | 0 | 0.027906637  | 0            | 0.042335602  | 0            | -0.62658491 | 0           |
| 0 | -0.11880979  | 0 | 0           | 0 | 0            | 0            | 0.04460543   | 0            | 0           | 0           |
| 0 | 0            | 0 | 0.16775841  | 0 | -0.19901552  | 0            | 0.060115192  | 0            | 0           | 0           |
| 0 | 0            | 0 | 0           | 0 | 0            | 0            | 0.055022543  | 0            | -0.62662852 | 0           |
| 0 | 0            | 0 | 0.15892494  | 0 | -0.15479524  | 0            | 0.11941091   | 0            | -0.62631977 | 0           |
| 0 | 0            | 0 | 0           | 0 | 0            | 0            | 0.055958933  | 0            | -0.6263118  | 0           |
| 0 | 0            | 0 | 0           | 0 | 0            | 0            | 0.065900858  | 0            | -0.62661261 | 0           |
| 0 | 0            | 0 | 0           | 0 | 0            | 0            | 0.056817363  | 0            | -0.62661832 | 0           |
| 0 | -0.087989189 | 0 | 0.094932613 | 0 | 0            | 0            | 0.039907749  | 0            | 0           | 0           |
| 0 | -0.1196639   | 0 | 0           | 0 | 0            | 0            | 0            | 0            | 0           | 0           |
| 0 | 0            | 0 | 0           | 0 | 0            | 0            | 0.057431326  | 0            | -0.62662782 | 0           |
| 0 | 0            | 0 | 0.14933684  | 0 | -0.18486431  | 0            | 0            | 0            | -0.15742847 | 0           |

[illegible]

|   |              |   |            |   |             |   |             |   |             |
|---|--------------|---|------------|---|-------------|---|-------------|---|-------------|
| 0 | 0            | 0 | 0          | 0 | 0           | 0 | 0.051754067 | 0 | -0.17940897 |
| 0 | 0            | 0 | 0          | 0 | 0           | 0 | 0.052319896 | 0 | -0.17956414 |
| 0 | -0.038299512 | 0 | 0          | 0 | 0           | 0 | 0.056660823 | 0 | 0           |
| 0 | -0.036583124 | 0 | 0          | 0 | 0           | 0 | 0.055600517 | 0 | 0           |
| 0 | 0            | 0 | 0          | 0 | 0           | 0 | 0.054287526 | 0 | -0.17468647 |
| 0 | 0            | 0 | 0          | 0 | 0.046155476 | 0 | 0           | 0 | -0.18226629 |
| 0 | -0.028494777 | 0 | 0          | 0 | 0.01949118  | 0 | 0.050611808 | 0 | 0           |
| 0 | -0.027206798 | 0 | 0          | 0 | 0.018530103 | 0 | 0.050060943 | 0 | 0           |
| 0 | -0.037466719 | 0 | 0          | 0 | 0           | 0 | 0.067287489 | 0 | 0           |
| 0 | -0.011097234 | 0 | 0          | 0 | 0.044605157 | 0 | 0           | 0 | -0.17274086 |
| 0 | -0.009847729 | 0 | 0          | 0 | 0.04336925  | 0 | 0           | 0 | -0.17368683 |
| 0 | -0.038042653 | 0 | 0          | 0 | 0           | 0 | 0.054687293 | 0 | 0           |
| 0 | -0.036349072 | 0 | 0          | 0 | 0           | 0 | 0.054053326 | 0 | 0           |
| 0 | 0            | 0 | 0          | 0 | 0.041586289 | 0 | 0           | 0 | -0.18184322 |
| 0 | 0            | 0 | 0          | 0 | 0.04332685  | 0 | 0           | 0 | -0.18215031 |
| 0 | 0            | 0 | 0          | 0 | 0.029493888 | 0 | 0.039192422 | 0 | 0           |
| 0 | 0            | 0 | 0          | 0 | 0.040474742 | 0 | 0.051071093 | 0 | 0           |
| 0 | 0            | 0 | 0          | 0 | 0.038722862 | 0 | 0.050564707 | 0 | 0           |
| 0 | 0            | 0 | 0          | 0 | 0.025524866 | 0 | 0.035405914 | 0 | 0           |
| 0 | 0            | 0 | 0          | 0 | 0.026806887 | 0 | 0.035476869 | 0 | 0           |
| 0 | 0            | 0 | 0          | 0 | 0.04346015  | 0 | 0           | 0 | -0.17605741 |
| 0 | 0            | 0 | 0.15975952 | 0 | -0.15898572 | 0 | 0.10749266  | 0 | 0           |
| 0 | -0.031715822 | 0 | 0          | 0 | 0           | 0 | 0           | 0 | -0.15119215 |
| 0 | -0.03343659  | 0 | 0          | 0 | 0           | 0 | 0           | 0 | -0.14975181 |
| 0 | -0.015638863 | 0 | 0          | 0 | 0.031477027 | 0 | 0           | 0 | -0.16113994 |
| 0 | -0.016927958 | 0 | 0          | 0 | 0.032497223 | 0 | 0           | 0 | -0.16002026 |
| 0 | -0.003069167 | 0 | 0          | 0 | 0.058445385 | 0 | 0           | 0 | -0.17367778 |
| 0 | -0.032696744 | 0 | 0          | 0 | 0           | 0 | 0           | 0 | -0.14430275 |
| 0 | 0            | 0 | 0          | 0 | 0           | 0 | 0.054227617 | 0 | 0           |
| 0 | 0.012350809  | 0 | 0.15996176 | 0 | -0.14896461 | 0 | 0.11197038  | 0 | 0           |
| 0 | 0            | 0 | 0          | 0 | 0           | 0 | 0.050654922 | 0 | 0           |
| 0 | 0            | 0 | 0          | 0 | 0           | 0 | 0.051222231 | 0 | 0           |
| 0 | 0            | 0 | 0          | 0 | 0.046706613 | 0 | 0           | 0 | 0           |
| 0 | 0            | 0 | 0          | 0 | 0           | 0 | 0.053001326 | 0 | 0           |
| 0 | 0            | 0 | 0          | 0 | 0           | 0 | 0           | 0 | -0.1809967  |
| 0 | -0.015320501 | 0 | 0          | 0 | 0.044305229 | 0 | 0           | 0 | 0           |
| 0 | -0.014058189 | 0 | 0          | 0 | 0.043058477 | 0 | 0           | 0 | 0           |
| 0 | -0.030166983 | 0 | 0          | 0 | 0           | 0 | 0           | 0 | -0.6261548  |
| 0 | 0            | 0 | 0          | 0 | 0.041529398 | 0 | 0           | 0 | 0           |
| 0 | 0            | 0 | 0          | 0 | 0.043371066 | 0 | 0           | 0 | 0           |
| 0 | -0.035716636 | 0 | 0          | 0 | 0           | 0 | 0           | 0 | 0           |
| 0 | -0.037453578 | 0 | 0          | 0 | 0           | 0 | 0           | 0 | 0           |
| 0 | -0.031459677 | 0 | 0          | 0 | 0           | 0 | 0           | 0 | -0.62683987 |
| 0 | -0.022972023 | 0 | 0          | 0 | 0.028507696 | 0 | 0           | 0 | 0           |
| 0 | -0.021665431 | 0 | 0          | 0 | 0.027499892 | 0 | 0           | 0 | 0           |
| 0 | 0            | 0 | 0          | 0 | 0.043490426 | 0 | 0           | 0 | 0           |
| 0 | -0.036692    | 0 | 0          | 0 | 0           | 0 | 0           | 0 | 0           |

|   |              |   |             |   |              |   |             |   |             |
|---|--------------|---|-------------|---|--------------|---|-------------|---|-------------|
| 0 | -0.00725558  | 0 | 0           | 0 | 0.058199871  | 0 | 0           | 0 | 0           |
| 0 | 0            | 0 | 0           | 0 | 0            | 0 | 0           | 0 | -0.62655734 |
| 0 | 0            | 0 | 0.18431678  | 0 | -0.12293105  | 0 | 0.052542484 | 0 | 0           |
| 0 | 0            | 0 | 0.19070749  | 0 | -0.14535375  | 0 | 0           | 0 | 0           |
| 0 | 0            | 0 | 0.18378416  | 0 | -0.12137531  | 0 | 0.053030959 | 0 | 0           |
| 0 | 0            | 0 | 0           | 0 | 0            | 0 | 0           | 0 | 0           |
| 0 | 0            | 0 | 0.1902204   | 0 | -0.14366784  | 0 | 0           | 0 | 0           |
| 0 | 0            | 0 | 0.18819894  | 0 | -0.14497985  | 0 | 0.030131958 | 0 | 0           |
| 0 | 0            | 0 | 0.18557     | 0 | -0.12913589  | 0 | 0.042490018 | 0 | 0           |
| 0 | 0            | 0 | 0.089916244 | 0 | -0.082482312 | 0 | 0           | 0 | -0.62624696 |
| 0 | 0            | 0 | 0.18764743  | 0 | -0.14324581  | 0 | 0.030931179 | 0 | 0           |
| 0 | 0            | 0 | 0.18874744  | 0 | -0.13095316  | 0 | 0.045055796 | 0 | 0           |
| 0 | 0            | 0 | 0.20329221  | 0 | -0.15619476  | 0 | 0           | 0 | 0           |
| 0 | 0            | 0 | 0.19049979  | 0 | -0.14409636  | 0 | 0           | 0 | 0           |
| 0 | 0            | 0 | 0.18865605  | 0 | -0.12944792  | 0 | 0.045879566 | 0 | 0           |
| 0 | 0            | 0 | 0.099729726 | 0 | -0.099686981 | 0 | 0           | 0 | -0.18123473 |
| 0 | -0.030082606 | 0 | 0           | 0 | 0            | 0 | 0           | 0 | -0.16435882 |
| 0 | 0            | 0 | 0.20328135  | 0 | -0.1548254   | 0 | 0           | 0 | 0           |
| 0 | -0.10738216  | 0 | 0.18173879  | 0 | -0.28735459  | 0 | 0.06789795  | 0 | 0           |
| 0 | 0.030647743  | 0 | 0.10000863  | 0 | -0.078383149 | 0 | 0           | 0 | -0.20101696 |
| 0 | 0            | 0 | 0           | 0 | -0.059164505 | 0 | 0.062435106 | 0 | -0.62645832 |
| 0 | 0            | 0 | 0.17381552  | 0 | -0.093691927 | 0 | 0           | 0 | 0           |
| 0 | -0.034179746 | 0 | 0           | 0 | 0            | 0 | 0           | 0 | 0           |
| 0 | 0            | 0 | 0.17847296  | 0 | -0.1004091   | 0 | 0           | 0 | 0           |
| 0 | 0            | 0 | 0.10057362  | 0 | -0.099864982 | 0 | 0           | 0 | 0           |
| 0 | 0            | 0 | 0.186006    | 0 | -0.092619909 | 0 | 0           | 0 | 0           |
| 0 | 0            | 0 | 0.17361957  | 0 | -0.091640688 | 0 | 0           | 0 | 0           |
| 0 | 0.02638018   | 0 | 0.099640965 | 0 | -0.079439733 | 0 | 0           | 0 | 0           |
| 0 | -0.026689898 | 0 | 0           | 0 | -0.070967721 | 0 | 0.070129845 | 0 | -0.16010479 |
| 0 | 0            | 0 | 0           | 0 | -0.051527959 | 0 | 0.0705188   | 0 | -0.18569629 |
| 0 | -0.10923709  | 0 | 0.17009445  | 0 | -0.28083452  | 0 | 0           | 0 | 0           |
| 0 | 0            | 0 | 0           | 0 | -0.058635418 | 0 | 0.060071177 | 0 | -0.18569406 |
| 0 | 0            | 0 | 0           | 0 | 0            | 0 | 0.075065517 | 0 | -0.62623154 |
| 0 | -0.10529203  | 0 | 0.18908595  | 0 | -0.29446018  | 0 | 0           | 0 | 0           |
| 0 | -0.031574304 | 0 | 0           | 0 | -0.073010885 | 0 | 0.071401204 | 0 | 0           |
| 0 | 0            | 0 | 0           | 0 | -0.053806543 | 0 | 0           | 0 | -0.62616468 |
| 0 | 0            | 0 | 0           | 0 | -0.051631371 | 0 | 0.069273789 | 0 | 0           |
| 0 | 0            | 0 | 0           | 0 | -0.058145259 | 0 | 0.059776647 | 0 | 0           |
| 0 | 0            | 0 | 0.025944911 | 0 | 0            | 0 | 0.071690792 | 0 | -0.18440228 |
| 0 | 0.041011067  | 0 | 0.043438382 | 0 | 0            | 0 | 0           | 0 | -0.62695722 |
| 0 | 0            | 0 | 0           | 0 | -0.037516619 | 0 | 0           | 0 | -0.62624681 |
| 0 | 0            | 0 | 0.021525546 | 0 | 0            | 0 | 0.027991293 | 0 | -0.6263318  |
| 0 | 0.015713386  | 0 | 0           | 0 | 0            | 0 | 0.071166201 | 0 | -0.20275551 |
| 0 | 0.002806111  | 0 | 0           | 0 | -0.029957772 | 0 | 0           | 0 | -0.62626548 |
| 0 | 0.014079836  | 0 | 0           | 0 | 0            | 0 | 0.029412823 | 0 | -0.62606864 |
| 0 | 0            | 0 | 0           | 0 | 0            | 0 | 0.071980967 | 0 | -0.18960758 |
| 0 | 0            | 0 | 0           | 0 | 0            | 0 | 0.035092988 | 0 | -0.62621742 |

|   |              |   |             |   |              |   |             |             |
|---|--------------|---|-------------|---|--------------|---|-------------|-------------|
| 0 | 0.06329288   | 0 | 0.16391095  | 0 | -0.090751577 | 0 | 0           | -0.23395557 |
| 0 | -0.020518891 | 0 | 0           | 0 | -0.067353105 | 0 | 0           | -0.16739765 |
| 0 | 0.036227072  | 0 | 0.038319153 | 0 | 0            | 0 | 0.02106688  | -0.21499951 |
| 0 | 0            | 0 | 0.026595497 | 0 | 0            | 0 | 0.070484118 | 0           |
| 0 | 0            | 0 | 0.027076066 | 0 | 0            | 0 | 0           | -0.62618995 |
| 0 | 0            | 0 | 0           | 0 | -0.053545913 | 0 | 0           | -0.18980876 |
| 0 | 0            | 0 | 0.025409413 | 0 | 0            | 0 | 0           | -0.62628125 |
| 0 | -0.12520639  | 0 | 0           | 0 | -0.043296979 | 0 | 0.060988756 | 0           |
| 0 | 0.045746166  | 0 | 0.048210298 | 0 | 0            | 0 | 0           | -0.2244508  |
| 0 | -0.12462584  | 0 | 0           | 0 | -0.045092673 | 0 | 0.06055724  | 0           |
| 0 | 0.042041936  | 0 | 0.044017029 | 0 | 0            | 0 | 0           | -0.22092087 |
| 0 | 0.018165155  | 0 | 0           | 0 | 0            | 0 | 0           | -0.62691625 |
| 0 | 0.018953605  | 0 | 0           | 0 | 0            | 0 | 0           | -0.62692179 |
| 0 | -0.10395157  | 0 | 0.12022486  | 0 | -0.19150579  | 0 | 0.12921618  | 0           |
| 0 | -0.001650374 | 0 | 0           | 0 | -0.038025864 | 0 | 0           | -0.19267597 |
| 0 | 0.011833744  | 0 | 0           | 0 | 0            | 0 | 0.070170001 | 0           |
| 0 | 0            | 0 | 0           | 0 | 0            | 0 | 0           | -0.62631647 |
| 0 | 0            | 0 | 0           | 0 | 0            | 0 | 0.070838192 | 0           |
| 0 | 0            | 0 | 0.022060554 | 0 | 0            | 0 | 0.031074967 | -0.1816229  |
| 0 | -0.11833842  | 0 | 0           | 0 | -0.013953187 | 0 | 0.085281102 | 0           |
| 0 | -0.02636748  | 0 | 0           | 0 | -0.071389257 | 0 | 0           | 0           |
| 0 | -0.11569623  | 0 | 0           | 0 | 0            | 0 | 0.057725532 | 0           |
| 0 | -0.12068401  | 0 | 0           | 0 | -0.016921732 | 0 | 0.083376153 | 0           |
| 0 | 0            | 0 | 0.11406001  | 0 | 0            | 0 | 0           | 0           |
| 0 | 0.015393973  | 0 | 0           | 0 | 0            | 0 | 0.032173162 | -0.199318   |
| 0 | -0.11613605  | 0 | 0           | 0 | 0            | 0 | 0.070535405 | 0           |
| 0 | -0.022806499 | 0 | 0           | 0 | 0            | 0 | 0           | -0.62640952 |
| 0 | 0            | 0 | 0.12749674  | 0 | 0            | 0 | 0.037940382 | 0           |
| 0 | 0            | 0 | 0.11523523  | 0 | 0            | 0 | 0           | 0           |
| 0 | 0            | 0 | 0.12700867  | 0 | 0            | 0 | 0.037316774 | 0           |
| 0 | -0.11580961  | 0 | 0           | 0 | 0            | 0 | 0.058380185 | 0           |
| 0 | 0            | 0 | 0           | 0 | -0.053596445 | 0 | 0           | 0           |
| 0 | -0.11986483  | 0 | 0           | 0 | -0.018279583 | 0 | 0.083431036 | 0           |
| 0 | 0.059681877  | 0 | 0.16474939  | 0 | -0.091727805 | 0 | 0           | 0           |
| 0 | 0.031890538  | 0 | 0.037112114 | 0 | 0            | 0 | 0.021210518 | 0           |
| 0 | -0.11461567  | 0 | 0           | 0 | 0            | 0 | 0.057915177 | 0           |
| 0 | 0.083774897  | 0 | 0.16515127  | 0 | -0.060774726 | 0 | 0           | -0.62624484 |
| 0 | 0            | 0 | 0.13052294  | 0 | 0            | 0 | 0           | 0           |
| 0 | 0            | 0 | 0.11361362  | 0 | 0            | 0 | 0.03198293  | 0           |
| 0 | 0            | 0 | 0.11474446  | 0 | 0            | 0 | 0.032748895 | 0           |
| 0 | 0            | 0 | 0.16378717  | 0 | -0.10512124  | 0 | 0           | -0.62626093 |
| 0 | 0            | 0 | 0.0270786   | 0 | 0            | 0 | 0           | -0.18832273 |
| 0 | 0.041292645  | 0 | 0.04683415  | 0 | 0            | 0 | 0           | 0           |
| 0 | 0            | 0 | 0.10809863  | 0 | 0            | 0 | 0           | 0           |
| 0 | 0.060297927  | 0 | 0.079618884 | 0 | 0            | 0 | 0.044552942 | -0.62644407 |
| 0 | 0            | 0 | 0.11687567  | 0 | 0            | 0 | 0           | 0           |
| 0 | 0            | 0 | 0.12796083  | 0 | 0            | 0 | 0.032812028 | 0           |

|   |              |   |             |   |              |   |             |             |
|---|--------------|---|-------------|---|--------------|---|-------------|-------------|
| 0 | -0.005753279 | 0 | 0           | 0 | -0.039265203 | 0 | 0           | 0           |
| 0 | 0.037871399  | 0 | 0.042940253 | 0 | 0            | 0 | 0           | 0           |
| 0 | 0            | 0 | 0.11782072  | 0 | 0            | 0 | 0.005883436 | 0           |
| 0 | 0            | 0 | 0.022790246 | 0 | 0            | 0 | 0.030918413 | 0           |
| 0 | 0            | 0 | 0.10792479  | 0 | 0            | 0 | 0.002171048 | 0           |
| 0 | 0            | 0 | 0.10668816  | 0 | 0            | 0 | 0.000925104 | 0           |
| 0 | -0.12407929  | 0 | 0           | 0 | -0.039074593 | 0 | 0           | 0           |
| 0 | 0.01960575   | 0 | 0           | 0 | 0            | 0 | 0           | -0.21043191 |
| 0 | -0.12562723  | 0 | 0           | 0 | -0.040202942 | 0 | 0           | 0           |
| 0 | -0.1248814   | 0 | 0           | 0 | -0.041885924 | 0 | 0           | 0           |
| 0 | 0.011724522  | 0 | 0           | 0 | 0            | 0 | 0.032411525 | 0           |
| 0 | 0.067864302  | 0 | 0.089986446 | 0 | 0            | 0 | 0.071030107 | -0.23556639 |
| 0 | 0            | 0 | 0.027703549 | 0 | 0            | 0 | 0           | 0           |
| 0 | -0.11629316  | 0 | 0           | 0 | 0            | 0 | 0           | 0           |
| 0 | 0.01594767   | 0 | 0           | 0 | 0            | 0 | 0           | 0           |
| 0 | 0.062306102  | 0 | 0.080889444 | 0 | 0            | 0 | 0.043897775 | -0.23113088 |
| 0 | 0.073870256  | 0 | 0.09489944  | 0 | 0            | 0 | 0           | -0.62703388 |
| 0 | 0.078637144  | 0 | 0.10137334  | 0 | 0            | 0 | 0           | -0.62716698 |
| 0 | 0            | 0 | 0.10925194  | 0 | 0            | 0 | -0.0195595  | 0           |
| 0 | 0.063451769  | 0 | 0.08914323  | 0 | 0            | 0 | 0.069971683 | 0           |
| 0 | 0            | 0 | 0.068186897 | 0 | 0            | 0 | 0.082661855 | -0.62640638 |
| 0 | 0            | 0 | 0.06301808  | 0 | 0            | 0 | 0.062871999 | -0.62650314 |
| 0 | -0.089859566 | 0 | 0.17359645  | 0 | -0.20932055  | 0 | 0.15690105  | 0           |
| 0 | 0.058413914  | 0 | 0.080679597 | 0 | 0            | 0 | 0.044707439 | 0           |
| 0 | 0.074398384  | 0 | 0.094714622 | 0 | 0            | 0 | 0           | -0.24583925 |
| 0 | 0            | 0 | 0.068081794 | 0 | 0            | 0 | 0.078876744 | -0.17851825 |
| 0 | -0.11213183  | 0 | 0           | 0 | 0.034339111  | 0 | 0           | 0           |
| 0 | 0.070210589  | 0 | 0.09390585  | 0 | 0            | 0 | 0           | 0           |
| 0 | -0.13391336  | 0 | 0           | 0 | -0.14604587  | 0 | 0.080684248 | 0           |
| 0 | 0            | 0 | 0.068586108 | 0 | 0            | 0 | 0.07778681  | 0           |
| 0 | 0            | 0 | 0.071295546 | 0 | 0            | 0 | 0           | -0.62609729 |
| 0 | -0.12641157  | 0 | 0           | 0 | -0.12018184  | 0 | 0.11137869  | 0           |
| 0 | 0            | 0 | 0           | 0 | -0.047848816 | 0 | 0.088766855 | -0.62649265 |
| 0 | 0            | 0 | 0           | 0 | -0.028707225 | 0 | 0.11481076  | -0.62630079 |
| 0 | 0.010073825  | 0 | 0           | 0 | -0.019677698 | 0 | 0.12037202  | -0.62722879 |
| 0 | 0.020627208  | 0 | 0           | 0 | 0            | 0 | 0.094404875 | -0.62639348 |
| 0 | -0.13204437  | 0 | 0           | 0 | -0.14711496  | 0 | 0           | 0           |
| 0 | 0.020837579  | 0 | 0           | 0 | 0            | 0 | 0.088578357 | -0.6271552  |
| 0 | 0            | 0 | 0           | 0 | 0            | 0 | 0.088953462 | -0.62664932 |
| 0 | 0            | 0 | 0           | 0 | -0.047743929 | 0 | 0.084463363 | -0.18599363 |
| 0 | 0            | 0 | 0.20110964  | 0 | -0.23786858  | 0 | 0.06544886  | 0           |
| 0 | -0.010751727 | 0 | 0           | 0 | -0.054806516 | 0 | 0.086959234 | -0.17222214 |
| 0 | 0.008314972  | 0 | 0           | 0 | -0.024079681 | 0 | 0.10978306  | -0.1974374  |
| 0 | -0.017175071 | 0 | 0           | 0 | -0.059253892 | 0 | 0.086307544 | 0           |
| 0 | 0            | 0 | 0           | 0 | -0.047844239 | 0 | 0.083350937 | 0           |
| 0 | 0            | 0 | 0.21205064  | 0 | -0.24827007  | 0 | 0.061156329 | 0           |
| 0 | 0.021796401  | 0 | 0           | 0 | 0            | 0 | 0.084263217 | -0.208398   |

|   |              |   |              |   |              |   |             |   |             |
|---|--------------|---|--------------|---|--------------|---|-------------|---|-------------|
| 0 | 0            | 0 | 0            | 0 | 0            | 0 | 0.05069899  | 0 | 0           |
| 0 | 0            | 0 | 0            | 0 | 0            | 0 | 0.051519386 | 0 | 0           |
| 0 | 0            | 0 | 0            | 0 | 0            | 0 | 0.026182311 | 0 | 0           |
| 0 | 0            | 0 | 0            | 0 | 5.88E-05     | 0 | 0.025957177 | 0 | 0           |
| 0 | 0.0034782    | 0 | 0            | 0 | -0.025566188 | 0 | 0.11160403  | 0 | 0           |
| 0 | 0            | 0 | 0            | 0 | -0.050316693 | 0 | 0           | 0 | -0.62632205 |
| 0 | 0            | 0 | 0            | 0 | 0.001273629  | 0 | 0.026680288 | 0 | 0           |
| 0 | 0            | 0 | 0            | 0 | 0.026925615  | 0 | 0           | 0 | 0           |
| 0 | 0            | 0 | 0.21400112   | 0 | -0.25103983  | 0 | 0           | 0 | 0           |
| 0 | 0            | 0 | 0            | 0 | 0.012678243  | 0 | 0           | 0 | 0           |
| 0 | 0            | 0 | 0            | 0 | 0.028351305  | 0 | 0           | 0 | 0           |
| 0 | -0.006370328 | 0 | 0            | 0 | -0.054502973 | 0 | 0           | 0 | -0.62619738 |
| 0 | 0            | 0 | 0            | 0 | 0            | 0 | 0           | 0 | 0           |
| 0 | 0            | 0 | 0            | 0 | 0.024451094  | 0 | 0.044131871 | 0 | 0           |
| 0 | 0.017840805  | 0 | 0            | 0 | 0            | 0 | 0.083397346 | 0 | 0           |
| 0 | 0            | 0 | 0            | 0 | 0.025894603  | 0 | 0.044903873 | 0 | 0           |
| 0 | 0            | 0 | 0            | 0 | 0            | 0 | 0.045560463 | 0 | 0           |
| 0 | -0.097769511 | 0 | 0.093087324  | 0 | -0.12674177  | 0 | 0           | 0 | 0           |
| 0 | 0            | 0 | 0            | 0 | 0.028338732  | 0 | 0           | 0 | 0           |
| 0 | 0.026022222  | 0 | 0            | 0 | 0            | 0 | 0           | 0 | -0.62694457 |
| 0 | -0.004925962 | 0 | 0            | 0 | -0.053338124 | 0 | 0           | 0 | -0.18456929 |
| 0 | 0            | 0 | 0.16871904   | 0 | -0.17421204  | 0 | 0.11843174  | 0 | 0           |
| 0 | 0            | 0 | 0            | 0 | -0.008187632 | 0 | 0.009942748 | 0 | 0           |
| 0 | -0.010852061 | 0 | 0            | 0 | -0.05740214  | 0 | 0           | 0 | 0           |
| 0 | 0.061411576  | 0 | 0            | 0 | 0.047145884  | 0 | 0           | 0 | -0.62725308 |
| 0 | -0.090167067 | 0 | 0            | 0 | 0            | 0 | 0.087627697 | 0 | 0           |
| 0 | -0.095011748 | 0 | -0.003198973 | 0 | 0            | 0 | 0.08504465  | 0 | 0           |
| 0 | -0.090333714 | 0 | -0.00432856  | 0 | 0            | 0 | 0.060233729 | 0 | 0           |
| 0 | -0.12540294  | 0 | 0            | 0 | -0.13642131  | 0 | 0.097316452 | 0 | 0           |
| 0 | 0            | 0 | 0            | 0 | 0.033689621  | 0 | 0.059580597 | 0 | 0           |
| 0 | 0            | 0 | 0            | 0 | 0.032551732  | 0 | 0.060427143 | 0 | 0           |
| 0 | 0            | 0 | 0            | 0 | 0.034249588  | 0 | 0.0609983   | 0 | 0           |
| 0 | 0            | 0 | 0            | 0 | 0            | 0 | 0.062389128 | 0 | 0           |
| 0 | 0            | 0 | 0            | 0 | 0.03429113   | 0 | 0.055822818 | 0 | 0           |
| 0 | 0            | 0 | 0            | 0 | 0.037722433  | 0 | 0           | 0 | 0           |
| 0 | -0.089146526 | 0 | 0.001256247  | 0 | 0            | 0 | 0           | 0 | 0           |
| 0 | -0.066124763 | 0 | 0.058324977  | 0 | 0            | 0 | 0.094758923 | 0 | 0           |
| 0 | 0            | 0 | 0            | 0 | -0.062355545 | 0 | 0.083156499 | 0 | 0           |
| 0 | 0            | 0 | 0.051223206  | 0 | 0            | 0 | 0.083723423 | 0 | 0           |
| 0 | 0            | 0 | 0.15336199   | 0 | -0.10155346  | 0 | 0.039881218 | 0 | -0.6263276  |
| 0 | 0            | 0 | 0.15282878   | 0 | -0.099965003 | 0 | 0.040272662 | 0 | -0.62632824 |
| 0 | 0            | 0 | 0.13077681   | 0 | -0.077479633 | 0 | 0           | 0 | -0.62622123 |
| 0 | 0            | 0 | 0.13044557   | 0 | -0.075422812 | 0 | 0           | 0 | -0.62626161 |
| 0 | 0            | 0 | 0.15744548   | 0 | -0.10900316  | 0 | 0           | 0 | -0.62625262 |
| 0 | 0            | 0 | 0.15691103   | 0 | -0.10712754  | 0 | 0           | 0 | -0.62623521 |
| 0 | 0            | 0 | 0.15401385   | 0 | -0.08500203  | 0 | 0           | 0 | -0.62627532 |
| 0 | 0            | 0 | 0.15342919   | 0 | -0.083112705 | 0 | 0           | 0 | -0.6262748  |

|   |              |   |             |   |              |   |             |             |
|---|--------------|---|-------------|---|--------------|---|-------------|-------------|
| 0 | 0            | 0 | 0.15369672  | 0 | -0.071562917 | 0 | 0           | -0.62624821 |
| 0 | 0.000971015  | 0 | 0.15404646  | 0 | -0.072320684 | 0 | 0           | -0.62672036 |
| 0 | 0            | 0 | 0.1379381   | 0 | -0.096419959 | 0 | 0.0285226   | -0.15182136 |
| 0 | -0.000179866 | 0 | 0.15341606  | 0 | -0.070276565 | 0 | 0           | -0.62610328 |
| 0 | 0            | 0 | 0.13782225  | 0 | -0.095004972 | 0 | 0.029224197 | -0.15193194 |
| 0 | -0.016800242 | 0 | 0.15272524  | 0 | -0.10577076  | 0 | 0.044458358 | -0.13267577 |
| 0 | 0            | 0 | 0.15330114  | 0 | -0.10346369  | 0 | 0.033121331 | -0.151954   |
| 0 | 0            | 0 | 0.15294987  | 0 | -0.098991911 | 0 | 0.037637975 | -0.14859346 |
| 0 | -0.017941995 | 0 | 0.1521583   | 0 | -0.10451158  | 0 | 0.045220826 | -0.13182219 |
| 0 | 0            | 0 | 0.15451525  | 0 | -0.10787208  | 0 | 0.031534513 | -0.14820625 |
| 0 | 0            | 0 | 0.15276851  | 0 | -0.10192262  | 0 | 0.033420215 | -0.1522037  |
| 0 | 0            | 0 | 0.13408151  | 0 | -0.084568251 | 0 | 0           | -0.15714064 |
| 0 | -0.016273583 | 0 | 0.12605195  | 0 | -0.079213385 | 0 | 0           | -0.13969036 |
| 0 | 0            | 0 | 0.13078581  | 0 | -0.076427243 | 0 | 0           | -0.15401016 |
| 0 | 0            | 0 | 0.15393599  | 0 | -0.10599966  | 0 | 0.032217729 | -0.14841796 |
| 0 | 0            | 0 | 0.1378959   | 0 | -0.092418428 | 0 | 0           | -0.15227145 |
| 0 | 0            | 0 | 0.13387054  | 0 | -0.082798036 | 0 | 0           | -0.15742381 |
| 0 | -0.023822433 | 0 | 0.15814151  | 0 | -0.1251009   | 0 | 0           | -0.12504131 |
| 0 | -0.017026852 | 0 | 0.12551945  | 0 | -0.077222942 | 0 | 0           | -0.13919969 |
| 0 | 0            | 0 | 0.13782837  | 0 | -0.09098398  | 0 | 0           | -0.1523935  |
| 0 | 0            | 0 | 0.15650086  | 0 | -0.10804813  | 0 | 0           | -0.15187653 |
| 0 | -0.024957284 | 0 | 0.1576308   | 0 | -0.12391179  | 0 | 0           | -0.12416037 |
| 0 | 0            | 0 | 0.15689887  | 0 | -0.10692987  | 0 | 0           | -0.14803605 |
| 0 | 0            | 0 | 0.15593906  | 0 | -0.10612432  | 0 | 0           | -0.15220044 |
| 0 | 0            | 0 | 0.15355673  | 0 | -0.083942721 | 0 | 0           | -0.15539286 |
| 0 | 0            | 0 | 0.13897028  | 0 | -0.09667886  | 0 | 0.0281402   | 0           |
| 0 | -0.021368421 | 0 | 0.15337531  | 0 | -0.10757574  | 0 | 0.045718922 | 0           |
| 0 | -0.005739617 | 0 | 0.15371901  | 0 | -0.085916587 | 0 | 0           | -0.15041377 |
| 0 | 0            | 0 | 0.13885435  | 0 | -0.095259009 | 0 | 0.028842722 | 0           |
| 0 | -0.02255018  | 0 | 0.15281474  | 0 | -0.1063128   | 0 | 0.046482521 | 0           |
| 0 | 0            | 0 | 0.083982266 | 0 | 0            | 0 | 0           | -0.62629895 |
| 0 | 0            | 0 | 0.15375275  | 0 | -0.099204769 | 0 | 0.037124508 | 0           |
| 0 | 0            | 0 | 0.15410527  | 0 | -0.10348578  | 0 | 0.032896334 | 0           |
| 0 | -0.006790138 | 0 | 0.15306906  | 0 | -0.084189176 | 0 | 0           | -0.1497868  |
| 0 | 0            | 0 | 0.085002593 | 0 | 0            | 0 | 0           | -0.62629348 |
| 0 | -0.02072865  | 0 | 0.12588395  | 0 | -0.080234275 | 0 | 0           | 0           |
| 0 | 0            | 0 | 0.155427    | 0 | -0.10875879  | 0 | 0.030430537 | 0           |
| 0 | -0.029547527 | 0 | 0.15909393  | 0 | -0.12982138  | 0 | 0           | 0           |
| 0 | 0            | 0 | 0.15357144  | 0 | -0.10193914  | 0 | 0.033186986 | 0           |
| 0 | 0            | 0 | 0.13500843  | 0 | -0.084709093 | 0 | 0           | 0           |
| 0 | 0            | 0 | 0.13188591  | 0 | -0.076925889 | 0 | 0           | 0           |
| 0 | 0            | 0 | 0.15484865  | 0 | -0.1068881   | 0 | 0.031113059 | 0           |
| 0 | -0.030712287 | 0 | 0.15857905  | 0 | -0.12862862  | 0 | 0           | 0           |
| 0 | -0.021489858 | 0 | 0.12534955  | 0 | -0.07822762  | 0 | 0           | 0           |
| 0 | 0            | 0 | 0.1394707   | 0 | -0.093906281 | 0 | 0           | 0           |
| 0 | 0            | 0 | 0.13480691  | 0 | -0.082946105 | 0 | 0           | 0           |
| 0 | 0.000973477  | 0 | 0.15356182  | 0 | -0.071305435 | 0 | 0           | -0.15057611 |



|   |              |   |             |   |              |              |   |             |
|---|--------------|---|-------------|---|--------------|--------------|---|-------------|
| 0 | 0            | 0 | 0.13939663  | 0 | -0.092465873 | 0            | 0 | 0           |
| 0 | 0            | 0 | 0.15733528  | 0 | -0.10891957  | 0            | 0 | 0           |
| 0 | 0            | 0 | 0.15768811  | 0 | -0.10775069  | 0            | 0 | 0           |
| 0 | 0            | 0 | 0.15679394  | 0 | -0.10701456  | 0            | 0 | 0           |
| 0 | 0            | 0 | 0.15431358  | 0 | -0.084061845 | 0            | 0 | 0           |
| 0 | -0.009752158 | 0 | 0.15439264  | 0 | -0.086795295 | 0            | 0 | 0           |
| 0 | -0.010794994 | 0 | 0.15377762  | 0 | -0.085067718 | 0            | 0 | 0           |
| 0 | 0            | 0 | 0.081816496 | 0 | 0            | 0.031866418  | 0 | -0.16376318 |
| 0 | -0.003015747 | 0 | 0.15422752  | 0 | -0.072113432 | 0            | 0 | 0           |
| 0 | 0            | 0 | 0.082789003 | 0 | 0            | 0.032540356  | 0 | -0.16363307 |
| 0 | 0            | 0 | 0.10841506  | 0 | 0            | 0.036739282  | 0 | -0.62635273 |
| 0 | 0            | 0 | 0.10794764  | 0 | 0            | 0.036156014  | 0 | -0.62634075 |
| 0 | 0            | 0 | 0.084911693 | 0 | 0            | 0            | 0 | -0.16343856 |
| 0 | 0            | 0 | 0.083897452 | 0 | 0            | 0            | 0 | -0.16718743 |
| 0 | 0            | 0 | 0.084924708 | 0 | 0            | 0            | 0 | -0.16719055 |
| 0 | 0.004204481  | 0 | 0.085564256 | 0 | 0            | 0            | 0 | -0.16738312 |
| 0 | 0            | 0 | 0.11132912  | 0 | 0            | 0            | 0 | -0.62641305 |
| 0 | 0.002686737  | 0 | 0.085971072 | 0 | 0            | 0            | 0 | -0.16594014 |
| 0 | 0            | 0 | 0.11065233  | 0 | 0            | 0            | 0 | -0.62628662 |
| 0 | 0.018700586  | 0 | 0.11547948  | 0 | 0            | 0            | 0 | -0.62682645 |
| 0 | 0            | 0 | 0.11015154  | 0 | 0            | 0            | 0 | -0.62629066 |
| 0 | 0.01681275   | 0 | 0.1154573   | 0 | 0            | 0            | 0 | -0.62681544 |
| 0 | 0            | 0 | 0.077106333 | 0 | 0            | -0.016771521 | 0 | -0.62624877 |
| 0 | 0            | 0 | 0.075978814 | 0 | 0            | -0.018114781 | 0 | -0.62625018 |
| 0 | 0            | 0 | 0.072550842 | 0 | 0            | 0            | 0 | -0.62629092 |
| 0 | 0            | 0 | 0.082646134 | 0 | 0            | 0.030639111  | 0 | 0           |
| 0 | 0            | 0 | 0.074453313 | 0 | 0            | 0            | 0 | -0.62627927 |
| 0 | 0            | 0 | 0.083616769 | 0 | 0            | 0.031344846  | 0 | 0           |
| 0 | 0            | 0 | 0.073138762 | 0 | 0            | 0            | 0 | -0.62627787 |
| 0 | -0.007553493 | 0 | 0.070027318 | 0 | 0            | 0            | 0 | -0.6261119  |
| 0 | -0.005983504 | 0 | 0.069039826 | 0 | 0            | 0            | 0 | -0.62676239 |
| 0 | 0            | 0 | 0.085643833 | 0 | 0            | 0            | 0 | 0           |
| 0 | 0            | 0 | 0.0846194   | 0 | 0            | 0            | 0 | 0           |
| 0 | 0            | 0 | 0.085654906 | 0 | 0            | 0            | 0 | 0           |
| 0 | 0            | 0 | 0.095845591 | 0 | 0            | -0.006412176 | 0 | -0.62625959 |
| 0 | -0.00038431  | 0 | 0.084459612 | 0 | 0            | 0            | 0 | 0           |
| 0 | 0            | 0 | 0.093691522 | 0 | 0            | 0            | 0 | -0.62625213 |
| 0 | 0.004429131  | 0 | 0.091982572 | 0 | 0            | 0            | 0 | -0.62674919 |
| 0 | -0.001908628 | 0 | 0.084879926 | 0 | 0            | 0            | 0 | 0           |
| 0 | 0.007128606  | 0 | 0.097341123 | 0 | 0            | -0.006761984 | 0 | -0.62675117 |
| 0 | 0.00582092   | 0 | 0.094891947 | 0 | 0            | 0            | 0 | -0.626751   |
| 0 | 0            | 0 | 0.095981169 | 0 | 0            | -0.004668142 | 0 | -0.62611619 |
| 0 | 0.008926905  | 0 | 0.097153142 | 0 | 0            | -0.008118549 | 0 | -0.6267627  |
| 0 | 0.007400675  | 0 | 0.094305286 | 0 | 0            | 0            | 0 | -0.62675961 |
| 0 | 0            | 0 | 0.095450764 | 0 | 0            | -0.00536597  | 0 | -0.62625324 |
| 0 | 0            | 0 | 0.1087249   | 0 | 0            | 0.033425213  | 0 | -0.157636   |
| 0 | 0.016226054  | 0 | 0.11281252  | 0 | 0            | 0.032978981  | 0 | -0.17246395 |

|   |              |   |             |   |             |              |   |             |
|---|--------------|---|-------------|---|-------------|--------------|---|-------------|
| 0 | 0.018124757  | 0 | 0.11288849  | 0 | 0           | 0.032235351  | 0 | -0.17417908 |
| 0 | 0            | 0 | 0.1082339   | 0 | 0           | 0.032213996  | 0 | -0.16160476 |
| 0 | 0            | 0 | 0.10776898  | 0 | 0           | 0.031685614  | 0 | -0.16152881 |
| 0 | 0            | 0 | 0.11085346  | 0 | 0           | 0            | 0 | -0.16210549 |
| 0 | 0.018464679  | 0 | 0.11601455  | 0 | 0           | 0            | 0 | -0.17419046 |
| 0 | 0.019327841  | 0 | 0.11512055  | 0 | 0           | 0            | 0 | -0.17938253 |
| 0 | 0.017415768  | 0 | 0.11508259  | 0 | 0           | 0            | 0 | -0.17778253 |
| 0 | 0            | 0 | 0.07732026  | 0 | 0           | -0.019026989 | 0 | -0.16355434 |
| 0 | 0            | 0 | 0.077447394 | 0 | 0           | -0.015402716 | 0 | -0.1622138  |
| 0 | 0            | 0 | 0.074174496 | 0 | 0           | 0            | 0 | -0.16031859 |
| 0 | 0            | 0 | 0.076353293 | 0 | 0           | -0.016467557 | 0 | -0.16220673 |
| 0 | -0.002655301 | 0 | 0.076273077 | 0 | 0           | -0.017605498 | 0 | -0.16136721 |
| 0 | -0.001121829 | 0 | 0.07574881  | 0 | 0           | -0.019117732 | 0 | -0.16286315 |
| 0 | -0.005824368 | 0 | 0.070354573 | 0 | 0           | 0            | 0 | -0.15852686 |
| 0 | 0            | 0 | 0.10927103  | 0 | 0           | 0.03226014   | 0 | 0           |
| 0 | -0.004600438 | 0 | 0.072639429 | 0 | 0           | 0            | 0 | -0.1566708  |
| 0 | -0.003211973 | 0 | 0.071837993 | 0 | 0           | 0            | 0 | -0.15776385 |
| 0 | 0            | 0 | 0.10880908  | 0 | 0           | 0.031163097  | 0 | 0           |
| 0 | 0            | 0 | 0.10833868  | 0 | 0           | 0.030631193  | 0 | 0           |
| 0 | 0.011695878  | 0 | 0.11218727  | 0 | 0           | 0.03205719   | 0 | 0           |
| 0 | 0.013612228  | 0 | 0.11225867  | 0 | 0           | 0.031303815  | 0 | 0           |
| 0 | 0            | 0 | 0.11120458  | 0 | 0           | 0            | 0 | 0           |
| 0 | -0.10727195  | 0 | 0.16803065  | 0 | -0.19272165 | 0.037287107  | 0 | 0           |
| 0 | -0.1078725   | 0 | 0.1673131   | 0 | -0.19076578 | 0.037938814  | 0 | 0           |
| 0 | 0.01403657   | 0 | 0.11533098  | 0 | 0           | 0            | 0 | 0           |
| 0 | 0.009035475  | 0 | 0.098440314 | 0 | 0           | -0.009292364 | 0 | -0.16768557 |
| 0 | 0            | 0 | 0.096553007 | 0 | 0           | -0.006945296 | 0 | -0.15926016 |
| 0 | 0.007033465  | 0 | 0.094711926 | 0 | 0           | 0            | 0 | -0.16482708 |
| 0 | 0.014923992  | 0 | 0.11447119  | 0 | 0           | 0            | 0 | 0           |
| 0 | 0.012999451  | 0 | 0.11443853  | 0 | 0           | 0            | 0 | 0           |
| 0 | 0            | 0 | 0.0781697   | 0 | 0           | -0.019563991 | 0 | 0           |
| 0 | 0.008815814  | 0 | 0.098510176 | 0 | 0           | -0.007584111 | 0 | -0.16732635 |
| 0 | 0.010656019  | 0 | 0.098411003 | 0 | 0           | -0.008665744 | 0 | -0.16887743 |
| 0 | 0            | 0 | 0.0783108   | 0 | 0           | -0.015629573 | 0 | 0           |
| 0 | -0.00701564  | 0 | 0.075391414 | 0 | 0           | -0.017629936 | 0 | 0           |
| 0 | 0            | 0 | 0.074978925 | 0 | 0           | 0            | 0 | 0           |
| 0 | 0            | 0 | 0.077204511 | 0 | 0           | -0.016714935 | 0 | 0           |
| 0 | -0.005466843 | 0 | 0.074858188 | 0 | 0           | -0.019150401 | 0 | 0           |
| 0 | -0.10930053  | 0 | 0.15587388  | 0 | -0.18214784 | 0            | 0 | 0           |
| 0 | -0.10663779  | 0 | 0.17092949  | 0 | -0.19122492 | 0            | 0 | 0           |
| 0 | -0.010284204 | 0 | 0.069436095 | 0 | 0           | 0            | 0 | 0           |
| 0 | -0.10983525  | 0 | 0.15554544  | 0 | -0.18048156 | 0            | 0 | 0           |
| 0 | -0.008960947 | 0 | 0.071823309 | 0 | 0           | 0            | 0 | 0           |
| 0 | -0.007569463 | 0 | 0.071002909 | 0 | 0           | 0            | 0 | 0           |
| 0 | -0.10670954  | 0 | 0.17138803  | 0 | -0.19351769 | 0            | 0 | 0           |
| 0 | -0.1074166   | 0 | 0.1706945   | 0 | -0.19162246 | 0            | 0 | 0           |
| 0 | -0.10719201  | 0 | 0.13345734  | 0 | -0.13958128 | 0.061291286  | 0 | 0           |

|   |              |   |             |   |              |   |              |   |             |
|---|--------------|---|-------------|---|--------------|---|--------------|---|-------------|
| 0 | -0.10777059  | 0 | 0.1331114   | 0 | -0.13787584  | 0 | 0.06193756   | 0 | 0           |
| 0 | 0.00495077   | 0 | 0.098238332 | 0 | 0            | 0 | -0.009035765 | 0 | 0           |
| 0 | 0            | 0 | 0.09733238  | 0 | 0            | 0 | -0.007211941 | 0 | 0           |
| 0 | -0.036941017 | 0 | 0           | 0 | 0            | 0 | 0            | 0 | -0.62671718 |
| 0 | 0.003082344  | 0 | 0.094788519 | 0 | 0            | 0 | 0            | 0 | 0           |
| 0 | 0            | 0 | 0           | 0 | 0            | 0 | 0.043718584  | 0 | -0.62636957 |
| 0 | -0.038442961 | 0 | 0           | 0 | 0            | 0 | 0            | 0 | -0.62671194 |
| 0 | 0.004783959  | 0 | 0.098363699 | 0 | 0            | 0 | -0.007110972 | 0 | 0           |
| 0 | 0.006629343  | 0 | 0.098272099 | 0 | 0            | 0 | -0.008202951 | 0 | 0           |
| 0 | 0            | 0 | 0           | 0 | 0            | 0 | 0.044491876  | 0 | -0.62646722 |
| 0 | 0            | 0 | 0           | 0 | 0.03217726   | 0 | 0            | 0 | -0.6263638  |
| 0 | -0.046789025 | 0 | 0           | 0 | -0.018861631 | 0 | 0            | 0 | -0.62667637 |
| 0 | -0.047743977 | 0 | 0           | 0 | -0.017365541 | 0 | 0            | 0 | -0.62607745 |
| 0 | 0            | 0 | 0           | 0 | 0.033639604  | 0 | 0            | 0 | -0.62635813 |
| 0 | -0.039122277 | 0 | 0           | 0 | 0            | 0 | 0            | 0 | -0.62667784 |
| 0 | -0.098238997 | 0 | 0.1622313   | 0 | -0.14242389  | 0 | 0.075276639  | 0 | 0           |
| 0 | -0.03645273  | 0 | 0           | 0 | 0            | 0 | 0.041883348  | 0 | -0.14389869 |
| 0 | -0.037700471 | 0 | 0           | 0 | 0            | 0 | 0            | 0 | -0.62669407 |
| 0 | -0.037811164 | 0 | 0           | 0 | 0            | 0 | -0.000599963 | 0 | -0.62669717 |
| 0 | 0            | 0 | 0           | 0 | 0            | 0 | 0            | 0 | -0.62654275 |
| 0 | -0.039251928 | 0 | 0           | 0 | 0            | 0 | 0            | 0 | -0.62668946 |
| 0 | -0.039393143 | 0 | 0           | 0 | 0            | 0 | 0.000915071  | 0 | -0.62669159 |
| 0 | -0.10089663  | 0 | 0.16204239  | 0 | -0.14561998  | 0 | 0.073170251  | 0 | 0           |
| 0 | 0            | 0 | 0           | 0 | 0            | 0 | 0            | 0 | -0.62637515 |
| 0 | -0.037932254 | 0 | 0           | 0 | 0            | 0 | 0.042621985  | 0 | -0.14255101 |
| 0 | -0.10006077  | 0 | 0.16279351  | 0 | -0.14734909  | 0 | 0.07291058   | 0 | 0           |
| 0 | 0            | 0 | 0           | 0 | 0            | 0 | 0            | 0 | -0.62639026 |
| 0 | 0            | 0 | 0           | 0 | 0.030211622  | 0 | 0.039417896  | 0 | -0.1788686  |
| 0 | 0            | 0 | 0           | 0 | 0.031603632  | 0 | 0.040119099  | 0 | -0.17895187 |
| 0 | -0.036128415 | 0 | 0           | 0 | 0            | 0 | 0            | 0 | -0.14824539 |
| 0 | -0.037085439 | 0 | 0           | 0 | 0            | 0 | 0            | 0 | -0.14364483 |
| 0 | -0.029442405 | 0 | 0           | 0 | 0.01295      | 0 | 0            | 0 | -0.15117253 |
| 0 | -0.040593916 | 0 | 0           | 0 | 0            | 0 | 0.040999711  | 0 | 0           |
| 0 | -0.037641448 | 0 | 0           | 0 | 0            | 0 | 0            | 0 | -0.14700322 |
| 0 | 0            | 0 | 0           | 0 | 0            | 0 | 0.041208064  | 0 | -0.17822691 |
| 0 | 0            | 0 | 0           | 0 | 0            | 0 | 0.039830054  | 0 | -0.18097229 |
| 0 | -0.042101399 | 0 | 0           | 0 | 0            | 0 | 0.041782447  | 0 | 0           |
| 0 | -0.030573706 | 0 | 0           | 0 | 0.013759408  | 0 | 0            | 0 | -0.1501881  |
| 0 | 0            | 0 | 0           | 0 | -0.005377896 | 0 | 0            | 0 | -0.62652078 |
| 0 | 0            | 0 | 0           | 0 | 0            | 0 | 0            | 0 | -0.62649416 |
| 0 | 0            | 0 | 0           | 0 | 0            | 0 | -0.001346482 | 0 | -0.62625353 |
| 0 | 0            | 0 | 0           | 0 | -0.008102928 | 0 | 0.003535471  | 0 | -0.62636062 |
| 0 | 0            | 0 | 0           | 0 | -0.005238904 | 0 | 0            | 0 | -0.62636674 |
| 0 | 0            | 0 | 0           | 0 | 0            | 0 | 0.040540202  | 0 | -0.18113389 |
| 0 | 0            | 0 | 0           | 0 | 0            | 0 | 0.000709166  | 0 | -0.62626001 |
| 0 | 0            | 0 | 0           | 0 | 0.032305252  | 0 | 0            | 0 | -0.18281667 |
| 0 | 0            | 0 | 0           | 0 | 0.033798044  | 0 | 0            | 0 | -0.17918943 |

|   |              |   |            |   |              |   |              |   |             |
|---|--------------|---|------------|---|--------------|---|--------------|---|-------------|
| 0 | 0            | 0 | 0          | 0 | -0.00691886  | 0 | 0.004166529  | 0 | -0.62611743 |
| 0 | 0            | 0 | 0          | 0 | -0.003849412 | 0 | 0            | 0 | -0.62625239 |
| 0 | -0.051133371 | 0 | 0          | 0 | -0.028628874 | 0 | 0.016935253  | 0 | -0.12877797 |
| 0 | 0            | 0 | 0          | 0 | 0            | 0 | 0.001916216  | 0 | -0.62636295 |
| 0 | -0.046310036 | 0 | 0          | 0 | -0.017632546 | 0 | 0            | 0 | -0.13402102 |
| 0 | 0            | 0 | 0          | 0 | 0.033794466  | 0 | 0            | 0 | -0.18302736 |
| 0 | -0.052022171 | 0 | 0          | 0 | -0.027856036 | 0 | 0.017677639  | 0 | -0.12822738 |
| 0 | -0.10267141  | 0 | 0.12185383 | 0 | -0.098159552 | 0 | 0            | 0 | 0           |
| 0 | -0.046583859 | 0 | 0          | 0 | -0.02033377  | 0 | 0            | 0 | -0.13495147 |
| 0 | -0.10546911  | 0 | 0.12458039 | 0 | -0.10718497  | 0 | 0            | 0 | 0           |
| 0 | -0.10621737  | 0 | 0.12413046 | 0 | -0.10512232  | 0 | 0            | 0 | 0           |
| 0 | -0.047395931 | 0 | 0          | 0 | -0.01901809  | 0 | 0            | 0 | -0.13442338 |
| 0 | -0.041081311 | 0 | 0          | 0 | 0            | 0 | 0            | 0 | 0           |
| 0 | -0.040112759 | 0 | 0          | 0 | 0            | 0 | 0            | 0 | 0           |
| 0 | 0            | 0 | 0          | 0 | 0.030220443  | 0 | 0.038180498  | 0 | 0           |
| 0 | -0.037962802 | 0 | 0          | 0 | 0            | 0 | 0            | 0 | -0.14070116 |
| 0 | -0.038034524 | 0 | 0          | 0 | 0            | 0 | -0.001388523 | 0 | -0.14154212 |
| 0 | 0            | 0 | 0          | 0 | 0            | 0 | 0            | 0 | -0.18218668 |
| 0 | -0.041649246 | 0 | 0          | 0 | 0            | 0 | 0            | 0 | 0           |
| 0 | -0.035432028 | 0 | 0          | 0 | 0.008954897  | 0 | 0            | 0 | 0           |
| 0 | 0            | 0 | 0          | 0 | 0.031635256  | 0 | 0.038865356  | 0 | 0           |
| 0 | -0.036683199 | 0 | 0          | 0 | 0            | 0 | -1.57E-05    | 0 | -0.14186698 |
| 0 | -0.03656172  | 0 | 0          | 0 | 0.009795249  | 0 | 0            | 0 | 0           |
| 0 | -0.038254131 | 0 | 0          | 0 | 0            | 0 | 0.001230488  | 0 | -0.14058561 |
| 0 | -0.055859682 | 0 | 0          | 0 | -0.030545307 | 0 | 0.01779039   | 0 | 0           |
| 0 | -0.050739312 | 0 | 0          | 0 | -0.018714899 | 0 | 0            | 0 | 0           |
| 0 | -0.056819094 | 0 | 0          | 0 | -0.029550706 | 0 | 0.018635531  | 0 | 0           |
| 0 | 0            | 0 | 0          | 0 | 0            | 0 | 0.039977628  | 0 | 0           |
| 0 | 0            | 0 | 0          | 0 | 0            | 0 | 0.038718914  | 0 | 0           |
| 0 | -0.050972646 | 0 | 0          | 0 | -0.021373582 | 0 | 0            | 0 | 0           |
| 0 | 0            | 0 | 0          | 0 | 0.033790171  | 0 | 0            | 0 | 0           |
| 0 | 0            | 0 | 0          | 0 | 0.032248257  | 0 | 0            | 0 | 0           |
| 0 | 0            | 0 | 0          | 0 | 0            | 0 | 0.039430047  | 0 | 0           |
| 0 | -0.051793152 | 0 | 0          | 0 | -0.0200435   | 0 | 0            | 0 | 0           |
| 0 | 0            | 0 | 0          | 0 | 0.0337357    | 0 | 0            | 0 | 0           |
| 0 | -0.041880194 | 0 | 0          | 0 | 0            | 0 | 0            | 0 | 0           |
| 0 | -0.041981375 | 0 | 0          | 0 | 0            | 0 | -0.001559049 | 0 | 0           |
| 0 | -0.040606095 | 0 | 0          | 0 | 0            | 0 | 9.15E-05     | 0 | 0           |
| 0 | -0.042190942 | 0 | 0          | 0 | 0            | 0 | 0.001340088  | 0 | 0           |
| 0 | 0            | 0 | 0          | 0 | -0.004398492 | 0 | 0            | 0 | -0.17680099 |
| 0 | 0            | 0 | 0          | 0 | -0.006129529 | 0 | 0.001450111  | 0 | -0.17739832 |
| 0 | 0            | 0 | 0          | 0 | 0            | 0 | -0.000539953 | 0 | -0.17636795 |
| 0 | 0            | 0 | 0          | 0 | 0            | 0 | 0            | 0 | 0           |
| 0 | 0            | 0 | 0          | 0 | -0.006530429 | 0 | 0.002911897  | 0 | -0.17659994 |
| 0 | 0            | 0 | 0          | 0 | -0.005463393 | 0 | 0.003526846  | 0 | -0.17677461 |
| 0 | 0            | 0 | 0          | 0 | -0.003963994 | 0 | 0            | 0 | 0           |
| 0 | 0            | 0 | 0          | 0 | -0.005625811 | 0 | 0.000740847  | 0 | 0           |

|   |              |   |             |   |              |   |              |             |
|---|--------------|---|-------------|---|--------------|---|--------------|-------------|
| 0 | -0.092700902 | 0 | 0.16670796  | 0 | -0.10463429  | 0 | 0            | 0           |
| 0 | 0            | 0 | 0           | 0 | 0            | 0 | -0.000632299 | 0           |
| 0 | 0            | 0 | 0           | 0 | -0.005902227 | 0 | 0.002471321  | 0           |
| 0 | 0            | 0 | 0           | 0 | -0.004718445 | 0 | 0.003001769  | 0           |
| 0 | -0.10187441  | 0 | 0.056602166 | 0 | 0            | 0 | 0.038768538  | 0           |
| 0 | 0            | 0 | 0.16676893  | 0 | -0.19831397  | 0 | 0.06378541   | -0.62614382 |
| 0 | -0.10106558  | 0 | 0.055713172 | 0 | 0            | 0 | 0.038118778  | 0           |
| 0 | -0.10069469  | 0 | 0.059805354 | 0 | 0            | 0 | 0            | 0           |
| 0 | 0            | 0 | 0.12202366  | 0 | -0.14168024  | 0 | 0.090045963  | -0.62641264 |
| 0 | -0.13320192  | 0 | 0           | 0 | -0.062723345 | 0 | 0.042706571  | 0           |
| 0 | -0.099842208 | 0 | 0.05994241  | 0 | 0            | 0 | 0            | 0           |
| 0 | -0.13219093  | 0 | 0           | 0 | -0.057003317 | 0 | 0.048531053  | 0           |
| 0 | -0.13220469  | 0 | 0           | 0 | -0.061114048 | 0 | 0.045157834  | 0           |
| 0 | -0.13168115  | 0 | 0           | 0 | -0.058522437 | 0 | 0.047932633  | 0           |
| 0 | -0.13156965  | 0 | 0           | 0 | -0.062432209 | 0 | 0.044714054  | 0           |
| 0 | -0.098876998 | 0 | 0.059073886 | 0 | 0            | 0 | 0            | 0           |
| 0 | -0.099201713 | 0 | 0.052921392 | 0 | 0            | 0 | 0            | 0           |
| 0 | 0            | 0 | 0.14412429  | 0 | -0.17855409  | 0 | 0.060540454  | -0.15737378 |
| 0 | -0.099516988 | 0 | 0.052370973 | 0 | 0            | 0 | 0.002826375  | 0           |
| 0 | 0            | 0 | 0.14967514  | 0 | -0.18548259  | 0 | 0            | -0.62618444 |
| 0 | -0.018724167 | 0 | 0.16745029  | 0 | -0.21123958  | 0 | 0.062449684  | -0.1343811  |
| 0 | -0.13136525  | 0 | 0           | 0 | -0.053874747 | 0 | 0            | 0           |
| 0 | -0.098475887 | 0 | 0.051472826 | 0 | 0            | 0 | 0.001766129  | 0           |
| 0 | 0            | 0 | 0.16653776  | 0 | -0.19788612  | 0 | 0.060300041  | -0.15437039 |
| 0 | -0.10330873  | 0 | 0.050844653 | 0 | 0            | 0 | -0.007744097 | 0           |
| 0 | -0.12887104  | 0 | 0           | 0 | -0.039873833 | 0 | 0            | 0           |
| 0 | -0.035272888 | 0 | 0           | 0 | 0            | 0 | 0.057416957  | -0.62687259 |
| 0 | -0.13086119  | 0 | 0           | 0 | -0.055536092 | 0 | 0            | 0           |
| 0 | -0.13150237  | 0 | 0           | 0 | -0.054078289 | 0 | 0            | 0           |
| 0 | -0.033573682 | 0 | 0           | 0 | 0            | 0 | 0.056356918  | -0.62688475 |
| 0 | -0.016227188 | 0 | 0.17396434  | 0 | -0.21746068  | 0 | 0            | -0.62627498 |
| 0 | -0.025972731 | 0 | 0           | 0 | 0.018568694  | 0 | 0.052001021  | -0.62689185 |
| 0 | 0            | 0 | 0.17269405  | 0 | -0.2053761   | 0 | 0            | -0.62619836 |
| 0 | -0.024694132 | 0 | 0           | 0 | 0.017616802  | 0 | 0.051447464  | -0.62689742 |
| 0 | -0.034445874 | 0 | 0           | 0 | 0            | 0 | 0.067758373  | -0.62687505 |
| 0 | -0.11959194  | 0 | 0           | 0 | 0            | 0 | 0.044635479  | 0           |
| 0 | 0            | 0 | 0.1234727   | 0 | -0.14404501  | 0 | 0.083867883  | -0.16637484 |
| 0 | -0.034987557 | 0 | 0           | 0 | 0            | 0 | 0.058304753  | -0.6268576  |
| 0 | 0            | 0 | 0           | 0 | 0.027747333  | 0 | 0.041414878  | -0.62658757 |
| 0 | -0.033304533 | 0 | 0           | 0 | 0            | 0 | 0.057672874  | -0.62686438 |
| 0 | 0            | 0 | 0           | 0 | 0.040234167  | 0 | 0.054869342  | -0.62647216 |
| 0 | 0            | 0 | 0           | 0 | 0.038483609  | 0 | 0.054360347  | -0.62647459 |
| 0 | 0            | 0 | 0.14585618  | 0 | -0.18019832  | 0 | 0.059413496  | 0           |
| 0 | -0.11856817  | 0 | 0           | 0 | 0            | 0 | 0.046320001  | 0           |
| 0 | 0            | 0 | 0           | 0 | 0.023774698  | 0 | 0.037611193  | -0.62660158 |
| 0 | 0            | 0 | 0           | 0 | 0.025050975  | 0 | 0.03768767   | -0.62659578 |
| 0 | 0            | 0 | 0.1590472   | 0 | -0.1598345   | 0 | 0.10930138   | -0.6266059  |

|   |              |   |             |   |             |   |             |   |             |
|---|--------------|---|-------------|---|-------------|---|-------------|---|-------------|
| 0 | -0.024659285 | 0 | 0.16852443  | 0 | -0.21634596 | 0 | 0.061911554 | 0 | 0           |
| 0 | -0.003104603 | 0 | 0.12052862  | 0 | -0.14123407 | 0 | 0.08907638  | 0 | -0.16053967 |
| 0 | -0.1174444   | 0 | 0           | 0 | 0           | 0 | 0.045661187 | 0 | 0           |
| 0 | 0            | 0 | 0.16750922  | 0 | -0.19887146 | 0 | 0.059308779 | 0 | 0           |
| 0 | 0            | 0 | 0           | 0 | 0           | 0 | 0.055109101 | 0 | -0.62663234 |
| 0 | 0.014670464  | 0 | 0.15929743  | 0 | -0.14903512 | 0 | 0.11290096  | 0 | -0.62704656 |
| 0 | 0            | 0 | 0           | 0 | 0           | 0 | 0.054400941 | 0 | -0.62664403 |
| 0 | -0.087695563 | 0 | 0.09517096  | 0 | 0           | 0 | 0.039210831 | 0 | 0           |
| 0 | 0            | 0 | 0           | 0 | 0           | 0 | 0.054968337 | 0 | -0.62664461 |
| 0 | 0            | 0 | 0           | 0 | 0           | 0 | 0.056799564 | 0 | -0.62661995 |
| 0 | -0.086656467 | 0 | 0.09535233  | 0 | 0           | 0 | 0.040846052 | 0 | 0           |
| 0 | -0.017377894 | 0 | 0.1489048   | 0 | -0.19627038 | 0 | 0           | 0 | -0.14094735 |
| 0 | 0            | 0 | 0           | 0 | 0.046205536 | 0 | 0           | 0 | -0.62652403 |
| 0 | -0.11893657  | 0 | 0           | 0 | 0           | 0 | 0           | 0 | 0           |
| 0 | 0            | 0 | 0.14930999  | 0 | -0.18491627 | 0 | 0           | 0 | -0.16020458 |
| 0 | 0            | 0 | 0.12436667  | 0 | -0.14422467 | 0 | 0.083834611 | 0 | 0           |
| 0 | -0.012335007 | 0 | 0           | 0 | 0.044352026 | 0 | 0           | 0 | -0.62686199 |
| 0 | -0.01107783  | 0 | 0           | 0 | 0.043116414 | 0 | 0           | 0 | -0.62686039 |
| 0 | 0            | 0 | 0           | 0 | 0.041499772 | 0 | 0           | 0 | -0.62638475 |
| 0 | -0.008071591 | 0 | 0.12041435  | 0 | -0.14324054 | 0 | 0.090341726 | 0 | 0           |
| 0 | 0            | 0 | 0           | 0 | 0.043333712 | 0 | 0           | 0 | -0.62639201 |
| 0 | -0.085396736 | 0 | 0.095120234 | 0 | 0           | 0 | 0.040351859 | 0 | 0           |
| 0 | -0.11635624  | 0 | 0           | 0 | 0           | 0 | 0.011964502 | 0 | 0           |
| 0 | -0.087726857 | 0 | 0.087356569 | 0 | 0           | 0 | 0.015740235 | 0 | 0           |
| 0 | -0.032757908 | 0 | 0           | 0 | 0           | 0 | 0           | 0 | -0.62674425 |
| 0 | -0.034487628 | 0 | 0           | 0 | 0           | 0 | 0           | 0 | -0.62673336 |
| 0 | 0            | 0 | 0           | 0 | 0.043460236 | 0 | 0           | 0 | -0.6263503  |
| 0 | -0.014771373 | 0 | 0.17307617  | 0 | -0.21539583 | 0 | 0           | 0 | -0.14132173 |
| 0 | -0.017458509 | 0 | 0           | 0 | 0.030028929 | 0 | 0           | 0 | -0.6267931  |
| 0 | -0.018914729 | 0 | 0           | 0 | 0.031006385 | 0 | 0           | 0 | -0.62643525 |
| 0 | -0.085809568 | 0 | 0.098860038 | 0 | 0           | 0 | 0           | 0 | 0           |
| 0 | -0.026375889 | 0 | 0           | 0 | 0.015962893 | 0 | 0.044216872 | 0 | -0.15431957 |
| 0 | -0.033777478 | 0 | 0           | 0 | 0           | 0 | 0.055316585 | 0 | -0.14792438 |
| 0 | -0.004239685 | 0 | 0           | 0 | 0.058305346 | 0 | 0           | 0 | -0.62685373 |
| 0 | -0.023427012 | 0 | 0           | 0 | 0.020658408 | 0 | 0.048370642 | 0 | -0.15299692 |
| 0 | -0.02504291  | 0 | 0           | 0 | 0.015119413 | 0 | 0.043787287 | 0 | -0.15542736 |
| 0 | -0.033735934 | 0 | 0           | 0 | 0           | 0 | 0           | 0 | -0.62669387 |
| 0 | 0            | 0 | 0           | 0 | 0.040595018 | 0 | 0.049745689 | 0 | -0.18046464 |
| 0 | 0            | 0 | 0           | 0 | 0.038815503 | 0 | 0.049294936 | 0 | -0.18026971 |
| 0 | -0.022933489 | 0 | 0.15024175  | 0 | -0.20130612 | 0 | 0           | 0 | 0           |
| 0 | 0            | 0 | 0           | 0 | 0.040585492 | 0 | 0.051654334 | 0 | -0.1755636  |
| 0 | -0.034126555 | 0 | 0           | 0 | 0           | 0 | 0.052965074 | 0 | -0.14745659 |
| 0 | -0.020310276 | 0 | 0           | 0 | 0.027256286 | 0 | 0.053549179 | 0 | -0.15622554 |
| 0 | -0.032425488 | 0 | 0           | 0 | 0           | 0 | 0.052395571 | 0 | -0.14891226 |
| 0 | -0.019029933 | 0 | 0           | 0 | 0.026278439 | 0 | 0.052979916 | 0 | -0.15735869 |
| 0 | 0            | 0 | 0           | 0 | 0.025944143 | 0 | 0.034974531 | 0 | -0.17843087 |
| 0 | -0.033524261 | 0 | 0           | 0 | 0           | 0 | 0.054920566 | 0 | -0.14303619 |

|   |              |   |             |   |              |   |             |             |
|---|--------------|---|-------------|---|--------------|---|-------------|-------------|
| 0 | 0            | 0 | 0.15083649  | 0 | -0.18632868  | 0 | 0           | 0           |
| 0 | 0.012824193  | 0 | 0.15917447  | 0 | -0.15337443  | 0 | 0.10237711  | 0           |
| 0 | 0            | 0 | 0           | 0 | 0            | 0 | 0           | -0.62651559 |
| 0 | -0.020340994 | 0 | 0.17407835  | 0 | -0.22015456  | 0 | 0           | 0           |
| 0 | 0            | 0 | 0           | 0 | 0            | 0 | 0.051709952 | 0           |
| 0 | -0.038019855 | 0 | 0           | 0 | 0            | 0 | 0.055767361 | 0           |
| 0 | -0.03116138  | 0 | 0           | 0 | 0.014802695  | 0 | 0.045524817 | 0           |
| 0 | -0.028252349 | 0 | 0           | 0 | 0.019422882  | 0 | 0.049620925 | 0           |
| 0 | -0.029809661 | 0 | 0           | 0 | 0.013944171  | 0 | 0.045102238 | 0           |
| 0 | -0.01113456  | 0 | 0           | 0 | 0.043953022  | 0 | 0           | -0.17239345 |
| 0 | -0.038350686 | 0 | 0           | 0 | 0            | 0 | 0.052211459 | 0           |
| 0 | -0.036646544 | 0 | 0           | 0 | 0            | 0 | 0.051641163 | 0           |
| 0 | -0.026663086 | 0 | 0           | 0 | 0.023093765  | 0 | 0.052919713 | 0           |
| 0 | 0            | 0 | 0           | 0 | 0.043519115  | 0 | 0           | -0.18187621 |
| 0 | -0.037760448 | 0 | 0           | 0 | 0            | 0 | 0.054072961 | 0           |
| 0 | -0.025383389 | 0 | 0           | 0 | 0.022098165  | 0 | 0.052349779 | 0           |
| 0 | -0.017593198 | 0 | 0           | 0 | 0.032032818  | 0 | 0           | -0.16530288 |
| 0 | -0.016282222 | 0 | 0           | 0 | 0.030994801  | 0 | 0           | -0.1663316  |
| 0 | 0            | 0 | 0           | 0 | 0.040585306  | 0 | 0.048643719 | 0           |
| 0 | 0            | 0 | 0           | 0 | 0.038806224  | 0 | 0.048193003 | 0           |
| 0 | 0            | 0 | 0           | 0 | 0.040595005  | 0 | 0.050425662 | 0           |
| 0 | 0            | 0 | 0           | 0 | 0.026698907  | 0 | 0.03464989  | 0           |
| 0 | -0.033136735 | 0 | 0           | 0 | 0            | 0 | 0           | -0.14983886 |
| 0 | -0.016412979 | 0 | 0           | 0 | 0.032924178  | 0 | 0           | -0.16036236 |
| 0 | 0.00819823   | 0 | 0.15994975  | 0 | -0.15550004  | 0 | 0.10417373  | 0           |
| 0 | 0            | 0 | 0           | 0 | 0            | 0 | 0.05061099  | 0           |
| 0 | -0.015360193 | 0 | 0           | 0 | 0.043649648  | 0 | 0           | 0           |
| 0 | -0.023672242 | 0 | 0           | 0 | 0.028022903  | 0 | 0           | 0           |
| 0 | -0.022366682 | 0 | 0           | 0 | 0.026962918  | 0 | 0           | 0           |
| 0 | -0.031494756 | 0 | 0           | 0 | 0            | 0 | 0           | -0.62617297 |
| 0 | 0            | 0 | 0           | 0 | 0.043452799  | 0 | 0           | 0           |
| 0 | -0.037158403 | 0 | 0           | 0 | 0            | 0 | 0           | 0           |
| 0 | -0.022469372 | 0 | 0           | 0 | 0.028924006  | 0 | 0           | 0           |
| 0 | 0            | 0 | 0.099843796 | 0 | -0.099860191 | 0 | 0           | -0.62627933 |
| 0 | 0            | 0 | 0.18765694  | 0 | -0.14432075  | 0 | 0.034339416 | 0           |
| 0 | 0            | 0 | 0.18712078  | 0 | -0.1426374   | 0 | 0.035098342 | 0           |
| 0 | 0            | 0 | 0.18403318  | 0 | -0.12171467  | 0 | 0.051910783 | 0           |
| 0 | 0            | 0 | 0.19035431  | 0 | -0.14365824  | 0 | 0           | 0           |
| 0 | 0.02918352   | 0 | 0.099652874 | 0 | -0.078809122 | 0 | 0           | -0.62609783 |
| 0 | 0            | 0 | 0.18288369  | 0 | -0.12249353  | 0 | 0.051781793 | 0           |
| 0 | 0            | 0 | 0.20030685  | 0 | -0.15336241  | 0 | 0           | 0           |
| 0 | 0            | 0 | 0.18285815  | 0 | -0.12109697  | 0 | 0.05254423  | 0           |
| 0 | 0            | 0 | 0.20097444  | 0 | -0.15555467  | 0 | 0.030453052 | 0           |
| 0 | 0            | 0 | 0.20033996  | 0 | -0.15207977  | 0 | 0           | 0           |
| 0 | 0            | 0 | 0.18784389  | 0 | -0.14324387  | 0 | 0.030086054 | 0           |
| 0 | 0            | 0 | 0.20092322  | 0 | -0.15426321  | 0 | 0.031275383 | 0           |
| 0 | 0            | 0 | 0.18886995  | 0 | -0.12982304  | 0 | 0.04467787  | 0           |

|   |              |   |             |   |              |   |             |             |
|---|--------------|---|-------------|---|--------------|---|-------------|-------------|
| 0 | 0.023437672  | 0 | 0.10657308  | 0 | -0.095015742 | 0 | 0           | -0.20075215 |
| 0 | 0            | 0 | 0.20314578  | 0 | -0.15458512  | 0 | 0           | 0           |
| 0 | -0.11084518  | 0 | 0.16346966  | 0 | -0.27402152  | 0 | 0.067585592 | 0           |
| 0 | -0.028911956 | 0 | 0           | 0 | -0.073058831 | 0 | 0.072789757 | -0.6269071  |
| 0 | -0.10615778  | 0 | 0.18182172  | 0 | -0.28647743  | 0 | 0.068655062 | 0           |
| 0 | 0            | 0 | 0           | 0 | -0.051802116 | 0 | 0.073051894 | -0.62645881 |
| 0 | 0.019148367  | 0 | 0.10618202  | 0 | -0.096044037 | 0 | 0           | 0           |
| 0 | 0            | 0 | 0.17404717  | 0 | -0.092737406 | 0 | 0           | 0           |
| 0 | 0            | 0 | 0           | 0 | -0.059397476 | 0 | 0.061946661 | -0.62645192 |
| 0 | 0            | 0 | 0.025792234 | 0 | 0            | 0 | 0.074226689 | -0.62630113 |
| 0 | -0.027358077 | 0 | 0           | 0 | -0.072065707 | 0 | 0.06873565  | -0.16065141 |
| 0 | -0.025238333 | 0 | 0           | 0 | -0.068559472 | 0 | 0.072093712 | -0.16160084 |
| 0 | 0            | 0 | 0           | 0 | -0.051594342 | 0 | 0.069856903 | -0.18712743 |
| 0 | -0.10867826  | 0 | 0.16997904  | 0 | -0.28033454  | 0 | 0           | 0           |
| 0 | 0.0145514    | 0 | 0           | 0 | 0            | 0 | 0.073763774 | -0.62672098 |
| 0 | 0            | 0 | 0           | 0 | 0            | 0 | 0.074536013 | -0.62647642 |
| 0 | 0.039861609  | 0 | 0.044346214 | 0 | 0            | 0 | 0.067509979 | -0.21829929 |
| 0 | -0.032189275 | 0 | 0           | 0 | -0.074026901 | 0 | 0.070101385 | 0           |
| 0 | -0.031521659 | 0 | 0           | 0 | -0.072923186 | 0 | 0.071473797 | 0           |
| 0 | -0.022233491 | 0 | 0           | 0 | -0.069003988 | 0 | 0           | -0.62674382 |
| 0 | 0.06212316   | 0 | 0.16412632  | 0 | -0.091225949 | 0 | 0           | -0.62633994 |
| 0 | 0.034738493  | 0 | 0.037288189 | 0 | 0            | 0 | 0.0224866   | -0.62700112 |
| 0 | 0            | 0 | 0           | 0 | -0.053858045 | 0 | 0           | -0.62631692 |
| 0 | 0            | 0 | 0           | 0 | -0.051679588 | 0 | 0.068722989 | 0           |
| 0 | 0.044584036  | 0 | 0.047482199 | 0 | 0            | 0 | 0           | -0.62698698 |
| 0 | 0            | 0 | 0.025892555 | 0 | 0            | 0 | 0.071120263 | -0.18566948 |
| 0 | 0.040614497  | 0 | 0.043353826 | 0 | 0            | 0 | 0           | -0.62624948 |
| 0 | -0.002896949 | 0 | 0           | 0 | -0.038668447 | 0 | 0           | -0.6264951  |
| 0 | 0            | 0 | 0.021853976 | 0 | 0            | 0 | 0.032542477 | -0.62632726 |
| 0 | 0.035168152  | 0 | 0.042915578 | 0 | 0            | 0 | 0.066533571 | 0           |
| 0 | 0.015709825  | 0 | 0           | 0 | 0            | 0 | 0.070553235 | -0.20405074 |
| 0 | 0.014481754  | 0 | 0           | 0 | 0            | 0 | 0.033762903 | -0.62696995 |
| 0 | -0.020745574 | 0 | 0           | 0 | -0.067587956 | 0 | 0           | -0.1700804  |
| 0 | 0.036502911  | 0 | 0.038774416 | 0 | 0            | 0 | 0.025532101 | -0.21250673 |
| 0 | 0            | 0 | 0.02701671  | 0 | 0            | 0 | 0           | -0.62628226 |
| 0 | -0.12494574  | 0 | 0           | 0 | -0.043009224 | 0 | 0.060406392 | 0           |
| 0 | 0            | 0 | 0.026583615 | 0 | 0            | 0 | 0.070008974 | 0           |
| 0 | -0.12562777  | 0 | 0           | 0 | -0.04356527  | 0 | 0.060698927 | 0           |
| 0 | 0.045602904  | 0 | 0.048089987 | 0 | 0            | 0 | 0           | -0.22690082 |
| 0 | -0.12495279  | 0 | 0           | 0 | -0.045310521 | 0 | 0.060334249 | 0           |
| 0 | 0            | 0 | 0.11151498  | 0 | 0            | 0 | 0.036606086 | 0           |
| 0 | 0            | 0 | 0.11263482  | 0 | 0            | 0 | 0.037303725 | 0           |
| 0 | 0.018923437  | 0 | 0           | 0 | 0            | 0 | 0           | -0.62698138 |
| 0 | -0.10496453  | 0 | 0.12096466  | 0 | -0.19339769  | 0 | 0.12789525  | 0           |
| 0 | 0.011825982  | 0 | 0           | 0 | 0            | 0 | 0.069689078 | 0           |
| 0 | 0            | 0 | 0.11520187  | 0 | 0            | 0 | 0           | 0           |
| 0 | 0            | 0 | 0.12767367  | 0 | 0            | 0 | 0.037149555 | 0           |



|   |              |   |             |   |              |   |             |   |             |
|---|--------------|---|-------------|---|--------------|---|-------------|---|-------------|
| 0 | -0.12044039  | 0 | 0           | 0 | -0.016922126 | 0 | 0.082511027 | 0 | 0           |
| 0 | -0.026601641 | 0 | 0           | 0 | -0.07161856  | 0 | 0           | 0 | 0           |
| 0 | 0.066494769  | 0 | 0.089318813 | 0 | 0            | 0 | 0.073630545 | 0 | -0.6272351  |
| 0 | -0.11558391  | 0 | 0           | 0 | 0            | 0 | 0.057812042 | 0 | 0           |
| 0 | 0.032172601  | 0 | 0.037588428 | 0 | 0            | 0 | 0.025940716 | 0 | 0           |
| 0 | 0            | 0 | 0.11478321  | 0 | 0            | 0 | 0.031908139 | 0 | 0           |
| 0 | 0.041147447  | 0 | 0.046725592 | 0 | 0            | 0 | 0           | 0 | 0           |
| 0 | 0            | 0 | 0.10789189  | 0 | 0            | 0 | 0.000969019 | 0 | 0           |
| 0 | 0.060844563  | 0 | 0.079995264 | 0 | 0            | 0 | 0.04570455  | 0 | -0.62711494 |
| 0 | -0.12531029  | 0 | 0           | 0 | -0.039904211 | 0 | 0           | 0 | 0           |
| 0 | 0.067679346  | 0 | 0.089689112 | 0 | 0            | 0 | 0.069964938 | 0 | -0.23763937 |
| 0 | 0.073394352  | 0 | 0.094292856 | 0 | 0            | 0 | 0           | 0 | -0.6270644  |
| 0 | 0.063284635  | 0 | 0.088889248 | 0 | 0            | 0 | 0.069039294 | 0 | 0           |
| 0 | 0            | 0 | 0.067934948 | 0 | 0            | 0 | 0.081467299 | 0 | -0.62641083 |
| 0 | -0.13184374  | 0 | 0           | 0 | -0.14444777  | 0 | 0.081934004 | 0 | 0           |
| 0 | 0            | 0 | 0           | 0 | -0.04801452  | 0 | 0.087064484 | 0 | -0.62650877 |
| 0 | -0.013105967 | 0 | 0           | 0 | -0.056803627 | 0 | 0.089737825 | 0 | -0.62663814 |
| 0 | 0.005992828  | 0 | 0           | 0 | -0.0261321   | 0 | 0.11265142  | 0 | -0.62722755 |
| 0 | 0.020790453  | 0 | 0           | 0 | 0            | 0 | 0.08696606  | 0 | -0.62717833 |
| 0 | -0.010994492 | 0 | 0           | 0 | -0.055167339 | 0 | 0.085218269 | 0 | -0.17549975 |
| 0 | 0            | 0 | 0.20767032  | 0 | -0.24343616  | 0 | 0.06555106  | 0 | 0           |
| 0 | 0            | 0 | 0           | 0 | 0.024409576  | 0 | 0.049300123 | 0 | 0           |
| 0 | -0.017428222 | 0 | 0           | 0 | -0.05958159  | 0 | 0.084670056 | 0 | 0           |
| 0 | 0            | 0 | 0           | 0 | 0.0257804    | 0 | 0.05004425  | 0 | 0           |
| 0 | 0            | 0 | 0           | 0 | 0            | 0 | 0.050692776 | 0 | 0           |
| 0 | 0            | 0 | 0           | 0 | 0.001093633  | 0 | 0.025569057 | 0 | 0           |
| 0 | 0            | 0 | 0           | 0 | 0.028471725  | 0 | 0           | 0 | 0           |
| 0 | -0.006669738 | 0 | 0           | 0 | -0.055004383 | 0 | 0           | 0 | -0.62682069 |
| 0 | 0            | 0 | 0           | 0 | 0.026053988  | 0 | 0.044063781 | 0 | 0           |
| 0 | -0.09069274  | 0 | -0.00153861 | 0 | 0            | 0 | 0.087678584 | 0 | 0           |
| 0 | 0            | 0 | 0           | 0 | 0.034402266  | 0 | 0.060276813 | 0 | 0           |
| 0 | 0            | 0 | 0.13868122  | 0 | -0.097915284 | 0 | 0.030481187 | 0 | -0.62632467 |
| 0 | -0.019008274 | 0 | 0.15280809  | 0 | -0.10797629  | 0 | 0.04707139  | 0 | -0.62675513 |
| 0 | 0            | 0 | 0.13855187  | 0 | -0.09653027  | 0 | 0.031156103 | 0 | -0.62613819 |
| 0 | -0.020175144 | 0 | 0.1522246   | 0 | -0.10669976  | 0 | 0.047833306 | 0 | -0.62674854 |
| 0 | 0            | 0 | 0.15344049  | 0 | -0.10463188  | 0 | 0.034986113 | 0 | -0.62633098 |
| 0 | 0            | 0 | 0.15308421  | 0 | -0.10037718  | 0 | 0.039217859 | 0 | -0.62620757 |
| 0 | 0            | 0 | 0.15445052  | 0 | -0.10807965  | 0 | 0.034128816 | 0 | -0.62620341 |
| 0 | 0            | 0 | 0.15291043  | 0 | -0.10310037  | 0 | 0.035291079 | 0 | -0.62632952 |
| 0 | 0            | 0 | 0.15387036  | 0 | -0.10620228  | 0 | 0.034815761 | 0 | -0.62622544 |
| 0 | 0            | 0 | 0.13428435  | 0 | -0.084718574 | 0 | 0           | 0 | -0.62619572 |
| 0 | -0.017586441 | 0 | 0.1258413   | 0 | -0.0795458   | 0 | 0           | 0 | -0.62668199 |
| 0 | 0            | 0 | 0.13102073  | 0 | -0.076615789 | 0 | 0           | 0 | -0.62625492 |
| 0 | 0            | 0 | 0.13821538  | 0 | -0.09281934  | 0 | 0           | 0 | -0.62617389 |
| 0 | -0.025766774 | 0 | 0.15833855  | 0 | -0.12671062  | 0 | 0           | 0 | -0.62604167 |
| 0 | 0            | 0 | 0.1340823   | 0 | -0.082932548 | 0 | 0           | 0 | -0.62627457 |
| 0 | -0.018593797 | 0 | 0.12528142  | 0 | -0.077612838 | 0 | 0           | 0 | -0.62617561 |

|   |              |   |             |   |              |   |             |             |
|---|--------------|---|-------------|---|--------------|---|-------------|-------------|
| 0 | -0.026650073 | 0 | 0.1578507   | 0 | -0.12544011  | 0 | 0           | -0.62658974 |
| 0 | 0            | 0 | 0.13814345  | 0 | -0.091380118 | 0 | 0           | -0.62617466 |
| 0 | 0            | 0 | 0.15667068  | 0 | -0.10830035  | 0 | 0           | -0.62625531 |
| 0 | 0            | 0 | 0.15706599  | 0 | -0.10718179  | 0 | 0           | -0.62616049 |
| 0 | 0            | 0 | 0.15610869  | 0 | -0.10637698  | 0 | 0           | -0.62625277 |
| 0 | 0            | 0 | 0.15368664  | 0 | -0.084080054 | 0 | 0           | -0.62614295 |
| 0 | -0.006911612 | 0 | 0.15386235  | 0 | -0.08627217  | 0 | 0           | -0.6267257  |
| 0 | -0.007979584 | 0 | 0.1532433   | 0 | -0.084544118 | 0 | 0           | -0.62671863 |
| 0 | -0.026413445 | 0 | 0.13237022  | 0 | -0.1040383   | 0 | 0.035191208 | -0.12785427 |
| 0 | -0.027380989 | 0 | 0.13213342  | 0 | -0.10289206  | 0 | 0.036114606 | -0.1270477  |
| 0 | -0.000393585 | 0 | 0.1536757   | 0 | -0.0716175   | 0 | 0           | -0.62622398 |
| 0 | 0            | 0 | 0.13804695  | 0 | -0.095221582 | 0 | 0.027942869 | -0.15152893 |
| 0 | 0            | 0 | 0.1394205   | 0 | -0.099105135 | 0 | 0.025735119 | -0.1539287  |
| 0 | 0            | 0 | 0.13557756  | 0 | -0.091903395 | 0 | 0.031069232 | -0.15237961 |
| 0 | -0.025807177 | 0 | 0.15530167  | 0 | -0.12552662  | 0 | 0.033082458 | -0.1233442  |
| 0 | -0.019469029 | 0 | 0.152771    | 0 | -0.11052908  | 0 | 0.039397926 | -0.13414367 |
| 0 | -0.017629571 | 0 | 0.15237958  | 0 | -0.10472227  | 0 | 0.044070428 | -0.1319341  |
| 0 | 0            | 0 | 0.13935425  | 0 | -0.097782304 | 0 | 0.026331102 | -0.15411105 |
| 0 | -0.020699425 | 0 | 0.15217651  | 0 | -0.10935034  | 0 | 0.040023327 | -0.13325035 |
| 0 | -0.026964886 | 0 | 0.15473123  | 0 | -0.12432801  | 0 | 0.03380556  | -0.12243872 |
| 0 | 0            | 0 | 0.15302998  | 0 | -0.10224841  | 0 | 0.032485249 | -0.15195193 |
| 0 | -0.019556077 | 0 | 0.12923055  | 0 | -0.088058499 | 0 | 0           | -0.14027254 |
| 0 | -0.026251334 | 0 | 0.1371886   | 0 | -0.10902959  | 0 | 0           | -0.12732876 |
| 0 | 0            | 0 | 0.13545698  | 0 | -0.090482415 | 0 | 0.031778265 | -0.1524939  |
| 0 | 0            | 0 | 0.15414331  | 0 | -0.10605308  | 0 | 0.031479616 | -0.14823897 |
| 0 | 0            | 0 | 0.15399887  | 0 | -0.10732423  | 0 | 0.029943324 | -0.15141939 |
| 0 | 0            | 0 | 0.13431947  | 0 | -0.083725378 | 0 | 0           | -0.15702755 |
| 0 | -0.017043943 | 0 | 0.12608662  | 0 | -0.078413108 | 0 | 0           | -0.13888329 |
| 0 | -0.027307371 | 0 | 0.13706494  | 0 | -0.10812008  | 0 | 0           | -0.12644414 |
| 0 | -0.020441743 | 0 | 0.12882551  | 0 | -0.08639833  | 0 | 0           | -0.1397782  |
| 0 | 0            | 0 | 0.15340158  | 0 | -0.10541224  | 0 | 0.03058024  | -0.15172155 |
| 0 | -0.031261801 | 0 | 0.13236709  | 0 | -0.10577444  | 0 | 0.036156916 | 0           |
| 0 | 0            | 0 | 0.13784701  | 0 | -0.092332597 | 0 | 0           | -0.1557041  |
| 0 | 0            | 0 | 0.13774658  | 0 | -0.090824438 | 0 | 0           | -0.15225301 |
| 0 | -0.024211264 | 0 | 0.15734521  | 0 | -0.12463297  | 0 | 0           | -0.12864383 |
| 0 | -0.024423841 | 0 | 0.15775958  | 0 | -0.12358369  | 0 | 0           | -0.12450147 |
| 0 | -0.032269809 | 0 | 0.13205299  | 0 | -0.10455723  | 0 | 0.03706339  | 0           |
| 0 | -0.025364906 | 0 | 0.15680751  | 0 | -0.12340669  | 0 | 0           | -0.12785738 |
| 0 | 0            | 0 | 0.13777002  | 0 | -0.090864814 | 0 | 0           | -0.1559294  |
| 0 | 0            | 0 | 0.081747749 | 0 | 0            | 0 | 0.034439619 | -0.62637041 |
| 0 | 0            | 0 | 0.15610176  | 0 | -0.10617308  | 0 | 0           | -0.15196175 |
| 0 | 0            | 0 | 0.082719877 | 0 | 0            | 0 | 0.035115737 | -0.62636641 |
| 0 | -0.031707363 | 0 | 0.15633189  | 0 | -0.13040962  | 0 | 0.032563977 | 0           |
| 0 | -0.024032311 | 0 | 0.15340629  | 0 | -0.11225497  | 0 | 0.040715925 | 0           |
| 0 | -0.03286764  | 0 | 0.15576543  | 0 | -0.1292098   | 0 | 0.033298052 | 0           |
| 0 | 0            | 0 | 0.13910742  | 0 | -0.095644988 | 0 | 0.027791361 | 0           |
| 0 | -0.022281248 | 0 | 0.15306603  | 0 | -0.10659699  | 0 | 0.045390148 | 0           |

|   |              |   |             |   |              |   |             |             |
|---|--------------|---|-------------|---|--------------|---|-------------|-------------|
| 0 | -0.03217044  | 0 | 0.13856625  | 0 | -0.11438029  | 0 | 0           | 0           |
| 0 | 0            | 0 | 0.14034029  | 0 | -0.099154919 | 0 | 0.025554208 | 0           |
| 0 | -0.006839543 | 0 | 0.15337479  | 0 | -0.085138987 | 0 | 0           | -0.14936134 |
| 0 | -0.025276551 | 0 | 0.15281576  | 0 | -0.11106504  | 0 | 0.041355139 | 0           |
| 0 | 0            | 0 | 0.085006787 | 0 | 0            | 0 | 0           | -0.62629438 |
| 0 | 0            | 0 | 0.13729317  | 0 | -0.093463788 | 0 | 0.029950385 | 0           |
| 0 | -0.023999869 | 0 | 0.12903858  | 0 | -0.089007195 | 0 | 0           | 0           |
| 0 | -0.03303677  | 0 | 0.13840974  | 0 | -0.11319378  | 0 | 0           | 0           |
| 0 | 0            | 0 | 0.083987511 | 0 | 0            | 0 | 0           | -0.62631263 |
| 0 | 0            | 0 | 0.14027726  | 0 | -0.097826403 | 0 | 0.026150252 | 0           |
| 0 | 0            | 0 | 0.15383376  | 0 | -0.10226483  | 0 | 0.032247728 | 0           |
| 0 | 0            | 0 | 0.08500024  | 0 | 0            | 0 | 0           | -0.62613817 |
| 0 | 0            | 0 | 0.13717075  | 0 | -0.09202211  | 0 | 0.030660252 | 0           |
| 0 | -0.021511562 | 0 | 0.12591981  | 0 | -0.079419971 | 0 | 0           | 0           |
| 0 | -0.024888284 | 0 | 0.12862671  | 0 | -0.087324507 | 0 | 0           | 0           |
| 0 | -0.029952525 | 0 | 0.15835274  | 0 | -0.12941983  | 0 | 0           | 0           |
| 0 | 0            | 0 | 0.15505705  | 0 | -0.10694286  | 0 | 0.030373575 | 0           |
| 0 | -0.030153057 | 0 | 0.15871058  | 0 | -0.12828975  | 0 | 0           | 0           |
| 0 | 0.00287471   | 0 | 0.085011775 | 0 | 0            | 0 | 0           | -0.62681479 |
| 0 | 0            | 0 | 0.15496409  | 0 | -0.10826346  | 0 | 0.028957246 | 0           |
| 0 | 0            | 0 | 0.13527091  | 0 | -0.083889363 | 0 | 0           | 0           |
| 0 | -0.031101027 | 0 | 0.15781281  | 0 | -0.12816781  | 0 | 0           | 0           |
| 0 | 0.001350569  | 0 | 0.085423064 | 0 | 0            | 0 | 0           | -0.62680045 |
| 0 | 0            | 0 | 0.13935525  | 0 | -0.092387535 | 0 | 0           | 0           |
| 0 | 0            | 0 | 0.13943762  | 0 | -0.093838358 | 0 | 0           | 0           |
| 0 | 0            | 0 | 0.15436588  | 0 | -0.1063553   | 0 | 0.029590695 | 0           |
| 0 | 0            | 0 | 0.13935949  | 0 | -0.09237087  | 0 | 0           | 0           |
| 0 | 0            | 0 | 0.15695662  | 0 | -0.1070642   | 0 | 0           | 0           |
| 0 | -0.010866227 | 0 | 0.15404079  | 0 | -0.08600245  | 0 | 0           | 0           |
| 0 | 0            | 0 | 0.0828424   | 0 | 0            | 0 | 0.031781972 | -0.16348623 |
| 0 | 0            | 0 | 0.081913161 | 0 | 0            | 0 | 0.030406592 | -0.16660982 |
| 0 | 0            | 0 | 0.10858103  | 0 | 0            | 0 | 0.03601747  | -0.62633576 |
| 0 | 0            | 0 | 0.082897216 | 0 | 0            | 0 | 0.03101668  | -0.16657281 |
| 0 | 0.002502545  | 0 | 0.082822821 | 0 | 0            | 0 | 0.031705031 | -0.16594381 |
| 0 | 0            | 0 | 0.10810109  | 0 | 0            | 0 | 0.034847703 | -0.62635809 |
| 0 | 0.014773647  | 0 | 0.11222422  | 0 | 0            | 0 | 0.035690815 | -0.6269113  |
| 0 | 0.016680689  | 0 | 0.11229776  | 0 | 0            | 0 | 0.034940383 | -0.62692426 |
| 0 | 0.000962373  | 0 | 0.083171456 | 0 | 0            | 0 | 0.032480154 | -0.16447388 |
| 0 | 0            | 0 | 0.10763574  | 0 | 0            | 0 | 0.034317996 | -0.62636379 |
| 0 | 0            | 0 | 0.084933757 | 0 | 0            | 0 | 0           | -0.16697946 |
| 0 | 0.003074821  | 0 | 0.086131164 | 0 | 0            | 0 | 0           | -0.16611873 |
| 0 | 0            | 0 | 0.11076554  | 0 | 0            | 0 | 0           | -0.62618699 |
| 0 | 0.003943072  | 0 | 0.085463135 | 0 | 0            | 0 | 0           | -0.17061562 |
| 0 | 0.017226882  | 0 | 0.11568485  | 0 | 0            | 0 | 0           | -0.62682076 |
| 0 | 0.002405321  | 0 | 0.085874117 | 0 | 0            | 0 | 0           | -0.1692803  |
| 0 | 0.018092847  | 0 | 0.11479329  | 0 | 0            | 0 | 0           | -0.62685627 |
| 0 | 0.016172274  | 0 | 0.1147552   | 0 | 0            | 0 | 0           | -0.62684578 |

|   |              |   |             |   |             |   |              |   |             |
|---|--------------|---|-------------|---|-------------|---|--------------|---|-------------|
| 0 | 0            | 0 | 0.077107101 | 0 | 0           | 0 | -0.017904435 | 0 | -0.62626245 |
| 0 | 0            | 0 | 0.083673587 | 0 | 0           | 0 | 0.030586955  | 0 | 0           |
| 0 | 0            | 0 | 0.074266244 | 0 | 0           | 0 | 0            | 0 | -0.62627849 |
| 0 | 0            | 0 | 0.077249079 | 0 | 0           | 0 | -0.013940571 | 0 | -0.62625126 |
| 0 | 0            | 0 | 0.07614467  | 0 | 0           | 0 | -0.015023493 | 0 | -0.62624508 |
| 0 | -0.004168596 | 0 | 0.075352547 | 0 | 0           | 0 | -0.016234508 | 0 | -0.62672399 |
| 0 | -0.002620304 | 0 | 0.074833814 | 0 | 0           | 0 | -0.017737586 | 0 | -0.62675237 |
| 0 | 0            | 0 | 0.082730419 | 0 | 0           | 0 | 0.029326279  | 0 | 0           |
| 0 | -0.007105994 | 0 | 0.069817343 | 0 | 0           | 0 | 0            | 0 | -0.62678682 |
| 0 | 0            | 0 | 0.083722725 | 0 | 0           | 0 | 0.02994172   | 0 | 0           |
| 0 | -0.005883029 | 0 | 0.072147694 | 0 | 0           | 0 | 0            | 0 | -0.62674106 |
| 0 | -0.002197823 | 0 | 0.081754556 | 0 | 0           | 0 | 0.030824979  | 0 | 0           |
| 0 | -0.004514835 | 0 | 0.071334306 | 0 | 0           | 0 | 0            | 0 | -0.6267441  |
| 0 | -0.003751128 | 0 | 0.08211425  | 0 | 0           | 0 | 0.031609211  | 0 | 0           |
| 0 | 0            | 0 | 0.085663235 | 0 | 0           | 0 | 0            | 0 | 0           |
| 0 | -0.001526219 | 0 | 0.085039641 | 0 | 0           | 0 | 0            | 0 | 0           |
| 0 | -0.000703471 | 0 | 0.08431264  | 0 | 0           | 0 | 0            | 0 | 0           |
| 0 | -0.002198266 | 0 | 0.084803073 | 0 | 0           | 0 | 0            | 0 | 0           |
| 0 | 0.007541018  | 0 | 0.097428818 | 0 | 0           | 0 | -0.007943821 | 0 | -0.62686651 |
| 0 | 0            | 0 | 0.096053944 | 0 | 0           | 0 | -0.005616877 | 0 | -0.62625957 |
| 0 | 0.00590669   | 0 | 0.094559547 | 0 | 0           | 0 | 0            | 0 | -0.6267522  |
| 0 | 0.016663464  | 0 | 0.11309601  | 0 | 0           | 0 | 0.032211415  | 0 | -0.17268059 |
| 0 | 0            | 0 | 0.10839409  | 0 | 0           | 0 | 0.031490471  | 0 | -0.1613723  |
| 0 | 0.006976357  | 0 | 0.09757423  | 0 | 0           | 0 | -0.005965135 | 0 | -0.6259875  |
| 0 | 0.015789588  | 0 | 0.11237981  | 0 | 0           | 0 | 0.031129893  | 0 | -0.17575976 |
| 0 | 0.017715139  | 0 | 0.11246515  | 0 | 0           | 0 | 0.030442007  | 0 | -0.17739601 |
| 0 | 0.009147161  | 0 | 0.097517274 | 0 | 0           | 0 | -0.006969317 | 0 | -0.62676515 |
| 0 | 0.017835618  | 0 | 0.11531596  | 0 | 0           | 0 | 0            | 0 | -0.1779217  |
| 0 | 0            | 0 | 0.077454963 | 0 | 0           | 0 | -0.016425925 | 0 | -0.16200721 |
| 0 | -0.002337552 | 0 | 0.076408402 | 0 | 0           | 0 | -0.018774981 | 0 | -0.16150397 |
| 0 | -0.004406127 | 0 | 0.072526    | 0 | 0           | 0 | 0            | 0 | -0.15654731 |
| 0 | -0.00246292  | 0 | 0.076476613 | 0 | 0           | 0 | -0.015154111 | 0 | -0.16007846 |
| 0 | -0.001017644 | 0 | 0.075955687 | 0 | 0           | 0 | -0.016347494 | 0 | -0.16132772 |
| 0 | 0            | 0 | 0.10897517  | 0 | 0           | 0 | 0.030461439  | 0 | 0           |
| 0 | 0.012126115  | 0 | 0.11246833  | 0 | 0           | 0 | 0.031288377  | 0 | 0           |
| 0 | 0.011272123  | 0 | 0.11178442  | 0 | 0           | 0 | 0.030311953  | 0 | 0           |
| 0 | 0.013212158  | 0 | 0.11186605  | 0 | 0           | 0 | 0.029597954  | 0 | 0           |
| 0 | -0.11017575  | 0 | 0.15272964  | 0 | -0.18173041 | 0 | 0.037089624  | 0 | 0           |
| 0 | -0.11070715  | 0 | 0.15237355  | 0 | -0.18008148 | 0 | 0.037749943  | 0 | 0           |
| 0 | -0.10756515  | 0 | 0.16752461  | 0 | -0.19062659 | 0 | 0.037247572  | 0 | 0           |
| 0 | 0.013412781  | 0 | 0.11467169  | 0 | 0           | 0 | 0            | 0 | 0           |
| 0 | -0.10712949  | 0 | 0.16803834  | 0 | -0.19263249 | 0 | 0.037382377  | 0 | 0           |
| 0 | -0.037582779 | 0 | 0           | 0 | 0           | 0 | 0.044607407  | 0 | -0.62683862 |
| 0 | -0.10782136  | 0 | 0.16731756  | 0 | -0.19073765 | 0 | 0.037973228  | 0 | 0           |
| 0 | 0.009172156  | 0 | 0.098650377 | 0 | 0           | 0 | -0.0086432   | 0 | -0.1674276  |
| 0 | -0.039083485 | 0 | 0           | 0 | 0           | 0 | 0.045374407  | 0 | -0.62683045 |
| 0 | 0            | 0 | 0.07831759  | 0 | 0           | 0 | -0.016656343 | 0 | 0           |

|   |              |   |             |   |              |              |             |             |
|---|--------------|---|-------------|---|--------------|--------------|-------------|-------------|
| 0 | -0.006614731 | 0 | 0.075666441 | 0 | 0            | -0.018796948 | 0           | 0           |
| 0 | -0.10955045  | 0 | 0.15555755  | 0 | -0.18021577  | 0            | 0           | 0           |
| 0 | -0.008771526 | 0 | 0.071710346 | 0 | 0            | 0            | 0           | 0           |
| 0 | -0.006804237 | 0 | 0.0756134   | 0 | 0            | -0.014921036 | 0           | 0           |
| 0 | -0.005241461 | 0 | 0.075107137 | 0 | 0            | -0.016166129 | 0           | 0           |
| 0 | -0.10946053  | 0 | 0.15589581  | 0 | -0.18227405  | 0            | 0           | 0           |
| 0 | -0.10706387  | 0 | 0.17086489  | 0 | -0.19144934  | 0            | 0           | 0           |
| 0 | -0.11009854  | 0 | 0.15559212  | 0 | -0.18069377  | 0            | 0           | 0           |
| 0 | 0            | 0 | 0           | 0 | 0.029984236  | 0            | 0.041977734 | -0.62641736 |
| 0 | -0.10751288  | 0 | 0.13343596  | 0 | -0.13818174  | 0            | 0.060864396 | 0           |
| 0 | 0            | 0 | 0           | 0 | 0.031397164  | 0            | 0.042659552 | -0.62644167 |
| 0 | -0.10799212  | 0 | 0.13403399  | 0 | -0.14107654  | 0            | 0.060273422 | 0           |
| 0 | -0.10866665  | 0 | 0.1337569   | 0 | -0.13954432  | 0            | 0.060792041 | 0           |
| 0 | -0.037167198 | 0 | 0           | 0 | 0            | 0            | 0           | -0.62674909 |
| 0 | -0.038121506 | 0 | 0           | 0 | 0            | 0            | 0           | -0.62670908 |
| 0 | -0.031239707 | 0 | 0           | 0 | 0.011511196  | 0            | 0           | -0.62675191 |
| 0 | 0.005119238  | 0 | 0.098513241 | 0 | 0            | -0.008168445 | 0           | 0           |
| 0 | -0.038693748 | 0 | 0           | 0 | 0            | 0            | 0           | -0.62673832 |
| 0 | 0            | 0 | 0           | 0 | 0            | 0.043717185  | 0           | -0.6261885  |
| 0 | 0            | 0 | 0           | 0 | 0            | 0.042430028  | 0           | -0.62647231 |
| 0 | -0.032376146 | 0 | 0           | 0 | 0.012322618  | 0            | 0           | -0.62675103 |
| 0 | 0            | 0 | 0           | 0 | 0            | 0.043141681  | 0           | -0.62647404 |
| 0 | -0.053471445 | 0 | 0           | 0 | -0.030961143 | 0            | 0.019403816 | -0.62606383 |
| 0 | -0.054155573 | 0 | 0           | 0 | -0.029901385 | 0            | 0.020295201 | -0.62669234 |
| 0 | 0            | 0 | 0           | 0 | 0.032214719  | 0            | 0           | -0.6263802  |
| 0 | 0            | 0 | 0           | 0 | 0.033728506  | 0            | 0           | -0.62636579 |
| 0 | -0.047781175 | 0 | 0           | 0 | -0.018140857 | 0            | 0           | -0.62623924 |
| 0 | 0            | 0 | 0           | 0 | 0.033702095  | 0            | 0           | -0.62638    |
| 0 | -0.047874959 | 0 | 0           | 0 | -0.020835922 | 0            | 0           | -0.62668398 |
| 0 | -0.048691381 | 0 | 0           | 0 | -0.019512292 | 0            | 0           | -0.62667851 |
| 0 | -0.038988161 | 0 | 0           | 0 | 0            | 0            | 0           | -0.6266797  |
| 0 | -0.10059614  | 0 | 0.16231092  | 0 | -0.14582494  | 0            | 0.072168285 | 0           |
| 0 | -0.039114412 | 0 | 0           | 0 | 0            | -0.000175833 | 0           | -0.62669007 |
| 0 | -0.037625394 | 0 | 0           | 0 | 0            | 0.041901007  | 0           | -0.14271333 |
| 0 | -0.036592642 | 0 | 0           | 0 | 0            | 0.040454341  | 0           | -0.14656346 |
| 0 | 0            | 0 | 0           | 0 | 0            | 0            | 0           | -0.62654271 |
| 0 | -0.031812354 | 0 | 0           | 0 | 0.00924772   | 0            | 0.041235891 | -0.14845619 |
| 0 | -0.038103518 | 0 | 0           | 0 | 0            | 0.041161808  | 0           | -0.14528629 |
| 0 | -0.037736329 | 0 | 0           | 0 | 0            | 0.001531433  | 0           | -0.6266994  |
| 0 | -0.039319627 | 0 | 0           | 0 | 0            | 0.002781507  | 0           | -0.62669569 |
| 0 | -0.0329615   | 0 | 0           | 0 | 0.010001944  | 0            | 0.041952877 | -0.14743171 |
| 0 | 0            | 0 | 0           | 0 | 0.031754284  | 0            | 0.039349436 | -0.1788181  |
| 0 | 0            | 0 | 0           | 0 | 0.030305751  | 0            | 0.038035939 | -0.18159197 |
| 0 | 0            | 0 | 0           | 0 | 0.031735911  | 0            | 0.038673116 | -0.18177874 |
| 0 | -0.03733024  | 0 | 0           | 0 | 0            | 0            | 0           | -0.14709256 |
| 0 | -0.029736524 | 0 | 0           | 0 | 0.012785399  | 0            | 0           | -0.15449361 |
| 0 | -0.030036852 | 0 | 0           | 0 | 0.014200272  | 0            | 0           | -0.15055639 |

|   |              |   |             |   |              |             |             |             |
|---|--------------|---|-------------|---|--------------|-------------|-------------|-------------|
| 0 | -0.041800823 | 0 | 0           | 0 | 0            | 0.041052128 | 0           | 0           |
| 0 | -0.04074591  | 0 | 0           | 0 | 0            | 0.039712794 | 0           | 0           |
| 0 | -0.030894696 | 0 | 0           | 0 | 0.013623947  | 0           | 0           | -0.15359393 |
| 0 | 0            | 0 | 0           | 0 | 0            | 0.039835268 | 0           | -0.18096674 |
| 0 | -0.038041494 | 0 | 0           | 0 | 0.005123222  | 0           | 0.040634656 | 0           |
| 0 | -0.042276693 | 0 | 0           | 0 | 0            | 0.04042001  | 0           | 0           |
| 0 | -0.039189257 | 0 | 0           | 0 | 0.005897388  | 0           | 0.041357205 | 0           |
| 0 | 0            | 0 | 0           | 0 | 0.033881891  | 0           | 0           | -0.18281878 |
| 0 | 0            | 0 | 0           | 0 | -0.00706468  | 0           | 0.003200474 | 0           |
| 0 | 0            | 0 | 0           | 0 | -0.004396638 | 0           | 0           | -0.62636581 |
| 0 | 0            | 0 | 0           | 0 | 0            | 0.000902428 | 0           | -0.62636201 |
| 0 | 0            | 0 | 0           | 0 | -0.007375841 | 0           | 0.004847918 | 0           |
| 0 | -0.051729346 | 0 | 0           | 0 | -0.027888903 | 0           | 0.016598033 | 0           |
| 0 | -0.10590286  | 0 | 0.12467077  | 0 | -0.1060511   | 0           | 0           | 0           |
| 0 | 0            | 0 | 0           | 0 | -0.006239651 | 0           | 0.005392817 | 0           |
| 0 | -0.051237349 | 0 | 0           | 0 | -0.029133783 | 0           | 0.016480729 | 0           |
| 0 | -0.047393348 | 0 | 0           | 0 | -0.019589273 | 0           | 0           | -0.13413857 |
| 0 | -0.052245264 | 0 | 0           | 0 | -0.028249964 | 0           | 0.017205223 | 0           |
| 0 | -0.04131663  | 0 | 0           | 0 | 0            | 0           | 0           | 0           |
| 0 | 0            | 0 | 0           | 0 | 0.031760761  | 0           | 0.038112775 | 0           |
| 0 | 0            | 0 | 0           | 0 | 0.030304785  | 0           | 0.036921858 | 0           |
| 0 | -0.036040322 | 0 | 0           | 0 | 0.010213965  | 0           | 0           | 0           |
| 0 | -0.035746098 | 0 | 0           | 0 | 0.008785903  | 0           | 0           | 0           |
| 0 | -0.037966709 | 0 | 0           | 0 | 0            | 0.000252051 | 0           | -0.14065998 |
| 0 | 0            | 0 | 0           | 0 | 0.03174774   | 0           | 0.037551835 | 0           |
| 0 | -0.036896165 | 0 | 0           | 0 | 0.009627213  | 0           | 0           | 0           |
| 0 | -0.056573786 | 0 | 0           | 0 | -0.029635489 | 0           | 0.017584841 | 0           |
| 0 | -0.055976865 | 0 | 0           | 0 | -0.030753816 | 0           | 0.017540869 | 0           |
| 0 | 0            | 0 | 0           | 0 | 0            | 0.038705228 | 0           | 0           |
| 0 | -0.051791968 | 0 | 0           | 0 | -0.020616386 | 0           | 0           | 0           |
| 0 | -0.056993182 | 0 | 0           | 0 | -0.029858284 | 0           | 0.018265226 | 0           |
| 0 | 0            | 0 | 0           | 0 | 0.03382293   | 0           | 0           | 0           |
| 0 | -0.041903947 | 0 | 0           | 0 | 0            | 0.000359448 | 0           | 0           |
| 0 | 0            | 0 | 0           | 0 | -0.005526068 | 0           | 0.002532593 | 0           |
| 0 | 0            | 0 | 0           | 0 | -0.004895149 | 0           | 0.002089855 | 0           |
| 0 | 0            | 0 | 0.14428938  | 0 | -0.1789705   | 0           | 0.063118517 | 0           |
| 0 | -0.10158463  | 0 | 0.05680053  | 0 | 0            | 0.038031839 | 0           | 0           |
| 0 | -0.020685452 | 0 | 0.16746898  | 0 | -0.21300174  | 0           | 0.065302268 | 0           |
| 0 | -0.10025146  | 0 | 0.056944925 | 0 | 0            | 0.039948614 | 0           | 0           |
| 0 | 0            | 0 | 0.16650465  | 0 | -0.19812405  | 0           | 0.062935077 | 0           |
| 0 | -0.0992398   | 0 | 0.056150088 | 0 | 0            | 0.0393819   | 0           | 0           |
| 0 | 0            | 0 | 0.12416448  | 0 | -0.14534836  | 0           | 0.085922203 | 0           |
| 0 | -0.099493233 | 0 | 0.060120881 | 0 | 0            | 0           | 0           | 0           |
| 0 | -0.005605794 | 0 | 0.12073953  | 0 | -0.14353781  | 0           | 0.091733515 | 0           |
| 0 | -0.13191751  | 0 | 0           | 0 | -0.056698104 | 0           | 0.047855965 | 0           |
| 0 | -0.13195259  | 0 | 0           | 0 | -0.061136965 | 0           | 0.04422451  | 0           |
| 0 | -0.13141029  | 0 | 0           | 0 | -0.056548306 | 0           | 0.04906025  | 0           |

|   |              |   |             |   |              |   |             |   |             |
|---|--------------|---|-------------|---|--------------|---|-------------|---|-------------|
| 0 | -0.13079804  | 0 | 0           | 0 | -0.057970403 | 0 | 0.048517138 | 0 | 0           |
| 0 | -0.021530486 | 0 | 0.14347895  | 0 | -0.19253659  | 0 | 0.061923754 | 0 | -0.13694767 |
| 0 | -0.099216221 | 0 | 0.052515099 | 0 | 0            | 0 | 0.001816397 | 0 | 0           |
| 0 | 0            | 0 | 0.14417659  | 0 | -0.17866254  | 0 | 0.059786333 | 0 | -0.15894497 |
| 0 | -0.019218045 | 0 | 0.14918262  | 0 | -0.19813365  | 0 | 0           | 0 | -0.62613458 |
| 0 | 0            | 0 | 0.1496535   | 0 | -0.1855368   | 0 | 0           | 0 | -0.62620047 |
| 0 | -0.018850975 | 0 | 0.1671552   | 0 | -0.21115314  | 0 | 0.061517551 | 0 | -0.13627861 |
| 0 | -0.13116454  | 0 | 0           | 0 | -0.05374498  | 0 | 0           | 0 | 0           |
| 0 | -0.03499565  | 0 | 0           | 0 | 0            | 0 | 0.056522316 | 0 | -0.62687827 |
| 0 | -0.028603233 | 0 | 0           | 0 | 0.013949779  | 0 | 0.04698802  | 0 | -0.62689357 |
| 0 | -0.025724044 | 0 | 0           | 0 | 0.018503167  | 0 | 0.051012112 | 0 | -0.62689251 |
| 0 | -0.027578536 | 0 | 0           | 0 | 0.013016245  | 0 | 0.046510877 | 0 | -0.62621467 |
| 0 | -0.027446219 | 0 | 0.14494591  | 0 | -0.19796505  | 0 | 0.061377054 | 0 | 0           |
| 0 | -0.016377729 | 0 | 0.17335108  | 0 | -0.21717872  | 0 | 0           | 0 | -0.62658862 |
| 0 | -0.035306149 | 0 | 0           | 0 | 0            | 0 | 0.055771398 | 0 | -0.6268857  |
| 0 | -0.033595628 | 0 | 0           | 0 | 0            | 0 | 0.055192606 | 0 | -0.62689653 |
| 0 | -0.02246273  | 0 | 0           | 0 | 0.025415476  | 0 | 0.056402141 | 0 | -0.62692662 |
| 0 | 0            | 0 | 0           | 0 | 0.040302877  | 0 | 0.052326941 | 0 | -0.62625483 |
| 0 | 0            | 0 | 0           | 0 | 0.038570021  | 0 | 0.051918439 | 0 | -0.62649234 |
| 0 | -0.021182081 | 0 | 0           | 0 | 0.024432783  | 0 | 0.055832064 | 0 | -0.62693297 |
| 0 | 0            | 0 | 0           | 0 | 0.040316208  | 0 | 0.054195535 | 0 | -0.62625954 |
| 0 | -0.034703413 | 0 | 0           | 0 | 0            | 0 | 0.057689022 | 0 | -0.62685603 |
| 0 | -0.11833009  | 0 | 0           | 0 | 0            | 0 | 0.045662074 | 0 | 0           |
| 0 | 0            | 0 | 0           | 0 | 0.024865518  | 0 | 0.036797812 | 0 | -0.62622947 |
| 0 | -0.004741092 | 0 | 0.12246126  | 0 | -0.14567539  | 0 | 0.085169964 | 0 | -0.16219878 |
| 0 | 0            | 0 | 0.14590298  | 0 | -0.18029376  | 0 | 0.058776859 | 0 | 0           |
| 0 | 0.010411793  | 0 | 0.15926526  | 0 | -0.15553281  | 0 | 0.105157    | 0 | -0.62670836 |
| 0 | -0.024783595 | 0 | 0.16827554  | 0 | -0.21629502  | 0 | 0.061085136 | 0 | 0           |
| 0 | 0            | 0 | 0           | 0 | 0            | 0 | 0.054303441 | 0 | -0.62635996 |
| 0 | -0.086322292 | 0 | 0.095613869 | 0 | 0            | 0 | 0.040161806 | 0 | 0           |
| 0 | -0.01762321  | 0 | 0.14888838  | 0 | -0.19647465  | 0 | 0           | 0 | -0.14353988 |
| 0 | -0.012686799 | 0 | 0           | 0 | 0.043612261  | 0 | 0           | 0 | -0.62617925 |
| 0 | 0            | 0 | 0           | 0 | 0.043420848  | 0 | 0           | 0 | -0.62637049 |
| 0 | -0.019434514 | 0 | 0           | 0 | 0.030571735  | 0 | 0           | 0 | -0.62681983 |
| 0 | -0.01828273  | 0 | 0           | 0 | 0.029481384  | 0 | 0           | 0 | -0.62648618 |
| 0 | -0.009664581 | 0 | 0.12230175  | 0 | -0.14756836  | 0 | 0.086525415 | 0 | 0           |
| 0 | -0.034455748 | 0 | 0           | 0 | 0            | 0 | 0           | 0 | -0.62606056 |
| 0 | -0.018169681 | 0 | 0           | 0 | 0.031482024  | 0 | 0           | 0 | -0.62684992 |
| 0 | -0.026102722 | 0 | 0           | 0 | 0.015974362  | 0 | 0.04331492  | 0 | -0.15439222 |
| 0 | -0.020676996 | 0 | 0           | 0 | 0.027108759  | 0 | 0.050999928 | 0 | -0.16071482 |
| 0 | 0            | 0 | 0           | 0 | 0.040718126  | 0 | 0.049121752 | 0 | -0.18029694 |
| 0 | -0.019394068 | 0 | 0           | 0 | 0.026128253  | 0 | 0.050485518 | 0 | -0.16174964 |
| 0 | -0.019789959 | 0 | 0           | 0 | 0.027720443  | 0 | 0.052880866 | 0 | -0.15658794 |
| 0 | -0.033843023 | 0 | 0           | 0 | 0            | 0 | 0.052373724 | 0 | -0.14756432 |
| 0 | -0.023154302 | 0 | 0.15022212  | 0 | -0.20150739  | 0 | 0           | 0 | 0           |
| 0 | -0.030893962 | 0 | 0           | 0 | 0.014799756  | 0 | 0.04463651  | 0 | 0           |
| 0 | -0.027059214 | 0 | 0           | 0 | 0.022950359  | 0 | 0.050473127 | 0 | 0           |

|   |              |   |             |   |              |             |             |             |
|---|--------------|---|-------------|---|--------------|-------------|-------------|-------------|
| 0 | -0.038086743 | 0 | 0           | 0 | 0            | 0.051628802 | 0           | 0           |
| 0 | -0.025759638 | 0 | 0           | 0 | 0.021944971  | 0           | 0.049952932 | 0           |
| 0 | -0.026152198 | 0 | 0           | 0 | 0.023549531  | 0           | 0.052259406 | 0           |
| 0 | -0.017081414 | 0 | 0           | 0 | 0.032455978  | 0           | 0           | -0.16559238 |
| 0 | 0            | 0 | 0           | 0 | 0.040709881  | 0           | 0.048047833 | 0           |
| 0 | -0.023168738 | 0 | 0           | 0 | 0.028441759  | 0           | 0           | 0           |
| 0 | 0.021975779  | 0 | 0.10624328  | 0 | -0.095511024 | 0           | 0           | -0.62628718 |
| 0 | 0            | 0 | 0.18731697  | 0 | -0.14264657  | 0           | 0.034274128 | 0           |
| 0 | 0            | 0 | 0.19743254  | 0 | -0.15247379  | 0           | 0.034448933 | 0           |
| 0 | 0            | 0 | 0.19739884  | 0 | -0.15117955  | 0           | 0.03520802  | 0           |
| 0 | 0            | 0 | 0.18302824  | 0 | -0.12141332  | 0           | 0.051380983 | 0           |
| 0 | 0            | 0 | 0.2001766   | 0 | -0.15181998  | 0           | 0           | 0           |
| 0 | 0            | 0 | 0.20084221  | 0 | -0.15404208  | 0           | 0.030448744 | 0           |
| 0 | -0.10947688  | 0 | 0.16311679  | 0 | -0.27264777  | 0           | 0.068481978 | 0           |
| 0 | -0.02969285  | 0 | 0           | 0 | -0.074103889 | 0           | 0.071475274 | -0.62654247 |
| 0 | -0.027480603 | 0 | 0           | 0 | -0.070484125 | 0           | 0.074892174 | -0.62664142 |
| 0 | 0            | 0 | 0           | 0 | -0.051858512 | 0           | 0.072421794 | -0.62646046 |
| 0 | 0.038196104  | 0 | 0.043375502 | 0 | 0            | 0           | 0.070115551 | -0.62687851 |
| 0 | 0            | 0 | 0.02576719  | 0 | 0            | 0           | 0.073656021 | -0.62625954 |
| 0 | -0.025308155 | 0 | 0           | 0 | -0.068668761 | 0           | 0.07139733  | -0.16301608 |
| 0 | 0.014734383  | 0 | 0           | 0 | 0            | 0           | 0.073243881 | -0.62712684 |
| 0 | 0.039847727  | 0 | 0.044320435 | 0 | 0            | 0           | 0.066931114 | -0.2195269  |
| 0 | -0.031588477 | 0 | 0           | 0 | -0.073018129 | 0           | 0.070892923 | 0           |
| 0 | -0.022470135 | 0 | 0           | 0 | -0.069248768 | 0           | 0           | -0.62676656 |
| 0 | 0.035027123  | 0 | 0.037775675 | 0 | 0            | 0           | 0.027275606 | -0.6269911  |
| 0 | 0.0444359    | 0 | 0.047359031 | 0 | 0            | 0           | 0           | -0.62701012 |
| 0 | 0.035148144  | 0 | 0.04289624  | 0 | 0            | 0           | 0.066077151 | 0           |
| 0 | -0.12534056  | 0 | 0           | 0 | -0.043267767 | 0           | 0.060133616 | 0           |
| 0 | 0            | 0 | 0.11266037  | 0 | 0            | 0           | 0.036467017 | 0           |
| 0 | 0.066320399  | 0 | 0.089046277 | 0 | 0            | 0           | 0.072628467 | -0.62724967 |
| 0 | -0.013489899 | 0 | 0           | 0 | -0.057185412 | 0           | 0.088015452 | -0.62630225 |
| 0 | 0            | 0 | 0           | 0 | 0.025954728  | 0           | 0.049207696 | 0           |
| 0 | -0.028536117 | 0 | 0.13261347  | 0 | -0.10623476  | 0           | 0.037858593 | -0.62672425 |
| 0 | -0.029539258 | 0 | 0.13229623  | 0 | -0.10503162  | 0           | 0.038762009 | -0.62671234 |
| 0 | 0            | 0 | 0.13881995  | 0 | -0.096887565 | 0           | 0.030135597 | -0.6263066  |
| 0 | -0.027764844 | 0 | 0.15529616  | 0 | -0.12718889  | 0           | 0.035962821 | -0.62667689 |
| 0 | -0.021622355 | 0 | 0.15282895  | 0 | -0.11257351  | 0           | 0.042133913 | -0.62675175 |
| 0 | 0            | 0 | 0.14007384  | 0 | -0.10043289  | 0           | 0.027856339 | -0.62631558 |
| 0 | -0.020143823 | 0 | 0.15247082  | 0 | -0.10705464  | 0           | 0.046656455 | -0.62628162 |
| 0 | 0            | 0 | 0.13573096  | 0 | -0.092273954 | 0           | 0.033668825 | -0.62631312 |
| 0 | -0.022853636 | 0 | 0.15224837  | 0 | -0.11139901  | 0           | 0.042771048 | -0.62675288 |
| 0 | -0.029069696 | 0 | 0.15471799  | 0 | -0.12604352  | 0           | 0.03665625  | -0.62636061 |
| 0 | 0            | 0 | 0.14001112  | 0 | -0.099111953 | 0           | 0.028451377 | -0.62631522 |
| 0 | 0            | 0 | 0.1531718   | 0 | -0.10342264  | 0           | 0.034356168 | -0.62632825 |
| 0 | 0            | 0 | 0.13560706  | 0 | -0.090855863 | 0           | 0.034363791 | -0.62617124 |
| 0 | -0.028064068 | 0 | 0.13742823  | 0 | -0.11063017  | 0           | 0           | -0.62638544 |
| 0 | -0.021068433 | 0 | 0.12900828  | 0 | -0.08851071  | 0           | 0           | -0.62630624 |



|   |              |   |             |   |              |   |             |   |             |
|---|--------------|---|-------------|---|--------------|---|-------------|---|-------------|
| 0 | 0            | 0 | 0.15407731  | 0 | -0.10621513  | 0 | 0.034100445 | 0 | -0.62643495 |
| 0 | 0            | 0 | 0.15395971  | 0 | -0.10753021  | 0 | 0.032596626 | 0 | -0.62631714 |
| 0 | -0.029148225 | 0 | 0.1373114   | 0 | -0.10977715  | 0 | 0           | 0 | -0.6263818  |
| 0 | -0.018641566 | 0 | 0.12585583  | 0 | -0.07881136  | 0 | 0           | 0 | -0.6260857  |
| 0 | -0.02178305  | 0 | 0.12863011  | 0 | -0.086776233 | 0 | 0           | 0 | -0.62669251 |
| 0 | 0            | 0 | 0.13452877  | 0 | -0.083860883 | 0 | 0           | 0 | -0.62627579 |
| 0 | 0            | 0 | 0.15336222  | 0 | -0.10562025  | 0 | 0.033231215 | 0 | -0.62631655 |
| 0 | -0.025915425 | 0 | 0.15757906  | 0 | -0.12618922  | 0 | 0           | 0 | -0.62662064 |
| 0 | 0            | 0 | 0.13817868  | 0 | -0.092727249 | 0 | 0           | 0 | -0.62625704 |
| 0 | -0.02637214  | 0 | 0.15796028  | 0 | -0.12518255  | 0 | 0           | 0 | -0.62604702 |
| 0 | 0            | 0 | 0.13806981  | 0 | -0.091211573 | 0 | 0           | 0 | -0.62624999 |
| 0 | -0.02707076  | 0 | 0.15703799  | 0 | -0.12495372  | 0 | 0           | 0 | -0.62661529 |
| 0 | 0            | 0 | 0.13810119  | 0 | -0.091260229 | 0 | 0           | 0 | -0.62625377 |
| 0 | 0            | 0 | 0.15626481  | 0 | -0.10647309  | 0 | 0           | 0 | -0.62611891 |
| 0 | -0.008271015 | 0 | 0.15348856  | 0 | -0.085564051 | 0 | 0           | 0 | -0.62623648 |
| 0 | -0.027112696 | 0 | 0.13236907  | 0 | -0.10312818  | 0 | 0.034983556 | 0 | -0.12713203 |
| 0 | -0.027684228 | 0 | 0.1338985   | 0 | -0.10766108  | 0 | 0.032132219 | 0 | -0.12925566 |
| 0 | -0.028186193 | 0 | 0.13469131  | 0 | -0.1097071   | 0 | 0.03272624  | 0 | -0.1256112  |
| 0 | -0.028728338 | 0 | 0.13363492  | 0 | -0.10657676  | 0 | 0.032914809 | 0 | -0.12849482 |
| 0 | -0.02928947  | 0 | 0.1345237   | 0 | -0.10886602  | 0 | 0.033472911 | 0 | -0.12466704 |
| 0 | 0            | 0 | 0.13956739  | 0 | -0.098094501 | 0 | 0.025359129 | 0 | -0.15386937 |
| 0 | -0.020375158 | 0 | 0.15244154  | 0 | -0.10955153  | 0 | 0.038999665 | 0 | -0.13329902 |
| 0 | -0.026406362 | 0 | 0.15492766  | 0 | -0.12401801  | 0 | 0.033060032 | 0 | -0.12280086 |
| 0 | 0            | 0 | 0.13541551  | 0 | -0.090314271 | 0 | 0.031023561 | 0 | -0.15235074 |
| 0 | -0.02601258  | 0 | 0.15476997  | 0 | -0.12512063  | 0 | 0.031471479 | 0 | -0.12642275 |
| 0 | 0            | 0 | 0.13564536  | 0 | -0.091857278 | 0 | 0.029630625 | 0 | -0.15519574 |
| 0 | -0.027196923 | 0 | 0.15420155  | 0 | -0.12390548  | 0 | 0.032144483 | 0 | -0.12559671 |
| 0 | -0.020366443 | 0 | 0.12929046  | 0 | -0.087305526 | 0 | 0           | 0 | -0.13945217 |
| 0 | -0.026535492 | 0 | 0.13713138  | 0 | -0.10912206  | 0 | 0           | 0 | -0.13057925 |
| 0 | -0.026811162 | 0 | 0.13701993  | 0 | -0.10771161  | 0 | 0           | 0 | -0.12676939 |
| 0 | 0            | 0 | 0.13552432  | 0 | -0.090393648 | 0 | 0.030287054 | 0 | -0.15539885 |
| 0 | 0            | 0 | 0.15361024  | 0 | -0.10546338  | 0 | 0.029853611 | 0 | -0.15150811 |
| 0 | -0.027636016 | 0 | 0.13701093  | 0 | -0.10825578  | 0 | 0           | 0 | -0.12975826 |
| 0 | -0.031970306 | 0 | 0.13236052  | 0 | -0.10484496  | 0 | 0.03596665  | 0 | 0           |
| 0 | 0            | 0 | 0.13763357  | 0 | -0.090639333 | 0 | 0           | 0 | -0.1557232  |
| 0 | -0.024829503 | 0 | 0.15694763  | 0 | -0.12308571  | 0 | 0           | 0 | -0.1281407  |
| 0 | -0.032486198 | 0 | 0.13384857  | 0 | -0.10927554  | 0 | 0.033198035 | 0 | 0           |
| 0 | 0            | 0 | 0.082777054 | 0 | 0            | 0 | 0.034355031 | 0 | -0.6263621  |
| 0 | -0.034070834 | 0 | 0.13611754  | 0 | -0.11491195  | 0 | 0.032200602 | 0 | 0           |
| 0 | -0.033546706 | 0 | 0.13359078  | 0 | -0.10818453  | 0 | 0.03398237  | 0 | 0           |
| 0 | -0.035184466 | 0 | 0.13591501  | 0 | -0.11399833  | 0 | 0.032947795 | 0 | 0           |
| 0 | 0            | 0 | 0.081844297 | 0 | 0            | 0 | 0.03302267  | 0 | -0.62637447 |
| 0 | 0            | 0 | 0.082832329 | 0 | 0            | 0 | 0.033633661 | 0 | -0.62620127 |
| 0 | 0.000775183  | 0 | 0.081993053 | 0 | 0            | 0 | 0.034397683 | 0 | -0.62652139 |
| 0 | -0.032320141 | 0 | 0.15594411  | 0 | -0.12888963  | 0 | 0.032552383 | 0 | 0           |
| 0 | -0.000590687 | 0 | 0.082360221 | 0 | 0            | 0 | 0.035212257 | 0 | -0.62689238 |
| 0 | -0.031946201 | 0 | 0.15585789  | 0 | -0.13006004  | 0 | 0.03105683  | 0 | 0           |

|   |              |   |             |   |              |   |              |   |             |
|---|--------------|---|-------------|---|--------------|---|--------------|---|-------------|
| 0 | -0.024950856 | 0 | 0.15308575  | 0 | -0.11126743  | 0 | 0.040324873  | 0 | 0           |
| 0 | -0.033115111 | 0 | 0.15527027  | 0 | -0.12882955  | 0 | 0.031740216  | 0 | 0           |
| 0 | -0.032518565 | 0 | 0.13833501  | 0 | -0.11269787  | 0 | 0            | 0 | 0           |
| 0 | -0.032260354 | 0 | 0.13848512  | 0 | -0.1141879   | 0 | 0            | 0 | 0           |
| 0 | 0            | 0 | 0.1404907   | 0 | -0.098139254 | 0 | 0.025178114  | 0 | 0           |
| 0 | 0            | 0 | 0.085028875 | 0 | 0            | 0 | 0            | 0 | -0.62630357 |
| 0 | -0.024819286 | 0 | 0.12910059  | 0 | -0.088228085 | 0 | 0            | 0 | 0           |
| 0 | 0            | 0 | 0.13714938  | 0 | -0.091880752 | 0 | 0.029901988  | 0 | 0           |
| 0 | -0.033354604 | 0 | 0.13835942  | 0 | -0.11329169  | 0 | 0            | 0 | 0           |
| 0 | 0            | 0 | 0.13736278  | 0 | -0.093428408 | 0 | 0.028626544  | 0 | 0           |
| 0 | 0.0017394    | 0 | 0.085585842 | 0 | 0            | 0 | 0            | 0 | -0.62680351 |
| 0 | -0.030574773 | 0 | 0.15795443  | 0 | -0.12785423  | 0 | 0            | 0 | 0           |
| 0 | 0            | 0 | 0.13725235  | 0 | -0.091995723 | 0 | 0.029284879  | 0 | 0           |
| 0 | 0.002609593  | 0 | 0.084909359 | 0 | 0            | 0 | 0            | 0 | -0.62684118 |
| 0 | 0            | 0 | 0.1545761   | 0 | -0.10640663  | 0 | 0.02886778   | 0 | 0           |
| 0 | 0.001063633  | 0 | 0.085324889 | 0 | 0            | 0 | 0            | 0 | -0.62683074 |
| 0 | 0            | 0 | 0.13928553  | 0 | -0.092222833 | 0 | 0            | 0 | 0           |
| 0 | 0            | 0 | 0.0829534   | 0 | 0            | 0 | 0.030285581  | 0 | -0.16639608 |
| 0 | 0            | 0 | 0.10826982  | 0 | 0            | 0 | 0.034148992  | 0 | -0.62635995 |
| 0 | 0.015259531  | 0 | 0.11247389  | 0 | 0            | 0 | 0.034887186  | 0 | -0.62694841 |
| 0 | 0.001377369  | 0 | 0.083392688 | 0 | 0            | 0 | 0.031692133  | 0 | -0.16468692 |
| 0 | 0.014093668  | 0 | 0.1117843   | 0 | 0            | 0 | 0.03383751   | 0 | -0.62645423 |
| 0 | 0.002367734  | 0 | 0.082865121 | 0 | 0            | 0 | 0.030256101  | 0 | -0.16866762 |
| 0 | 0.016341872  | 0 | 0.11188757  | 0 | 0            | 0 | 0.033189884  | 0 | -0.62710713 |
| 0 | 0.000816075  | 0 | 0.083225273 | 0 | 0            | 0 | 0.030971637  | 0 | -0.16728907 |
| 0 | 0.002796155  | 0 | 0.086036365 | 0 | 0            | 0 | 0            | 0 | -0.1694068  |
| 0 | 0.016590826  | 0 | 0.1149903   | 0 | 0            | 0 | 0            | 0 | -0.6268484  |
| 0 | 0            | 0 | 0.077272089 | 0 | 0            | 0 | -0.01493274  | 0 | -0.62639018 |
| 0 | -0.004116641 | 0 | 0.075465458 | 0 | 0            | 0 | -0.017461713 | 0 | -0.62608833 |
| 0 | 0            | 0 | 0.083773316 | 0 | 0            | 0 | 0.029237314  | 0 | 0           |
| 0 | -0.00333278  | 0 | 0.082337058 | 0 | 0            | 0 | 0.030821793  | 0 | 0           |
| 0 | -0.005689464 | 0 | 0.072036366 | 0 | 0            | 0 | 0            | 0 | -0.62673674 |
| 0 | -0.003955528 | 0 | 0.075579808 | 0 | 0            | 0 | -0.01346735  | 0 | -0.62672713 |
| 0 | -0.00240131  | 0 | 0.075080758 | 0 | 0            | 0 | -0.014706092 | 0 | -0.62672771 |
| 0 | -0.00233554  | 0 | 0.081791699 | 0 | 0            | 0 | 0.029488247  | 0 | 0           |
| 0 | -0.003905269 | 0 | 0.082158908 | 0 | 0            | 0 | 0.030211455  | 0 | 0           |
| 0 | -0.001653935 | 0 | 0.085026312 | 0 | 0            | 0 | 0            | 0 | 0           |
| 0 | 0.016228753  | 0 | 0.1126667   | 0 | 0            | 0 | 0.030385873  | 0 | -0.17594048 |
| 0 | 0.00744255   | 0 | 0.097728619 | 0 | 0            | 0 | -0.006995664 | 0 | -0.62633015 |
| 0 | -0.002098206 | 0 | 0.07664951  | 0 | 0            | 0 | -0.016266553 | 0 | -0.16020297 |
| 0 | 0.011706531  | 0 | 0.11207098  | 0 | 0            | 0 | 0.029568033  | 0 | 0           |
| 0 | -0.11042447  | 0 | 0.15231671  | 0 | -0.1796367   | 0 | 0.037053083  | 0 | 0           |
| 0 | -0.10986758  | 0 | 0.15265595  | 0 | -0.18147177  | 0 | 0.037306342  | 0 | 0           |
| 0 | -0.11048865  | 0 | 0.15231163  | 0 | -0.17988385  | 0 | 0.037908944  | 0 | 0           |
| 0 | -0.10748303  | 0 | 0.16753363  | 0 | -0.1905827   | 0 | 0.037300956  | 0 | 0           |
| 0 | -0.039046855 | 0 | 0           | 0 | 0            | 0 | 0.044604379  | 0 | -0.62632393 |
| 0 | -0.037733813 | 0 | 0           | 0 | 0            | 0 | 0.043240053  | 0 | -0.6268554  |

|   |              |   |             |   |              |   |              |   |             |
|---|--------------|---|-------------|---|--------------|---|--------------|---|-------------|
| 0 | -0.034028555 | 0 | 0           | 0 | 0.007422482  | 0 | 0.044067256  | 0 | -0.62660335 |
| 0 | -0.039252919 | 0 | 0           | 0 | 0            | 0 | 0.043953625  | 0 | -0.62685233 |
| 0 | -0.035047431 | 0 | 0           | 0 | 0.008214529  | 0 | 0.044809134  | 0 | -0.62684977 |
| 0 | -0.006449142 | 0 | 0.075761745 | 0 | 0            | 0 | -0.015978603 | 0 | 0           |
| 0 | -0.10977604  | 0 | 0.15559157  | 0 | -0.18039791  | 0 | 0            | 0 | 0           |
| 0 | 0            | 0 | 0           | 0 | 0.031524073  | 0 | 0.041907207  | 0 | -0.62645213 |
| 0 | 0            | 0 | 0           | 0 | 0.030081714  | 0 | 0.040639086  | 0 | -0.62645392 |
| 0 | -0.10835918  | 0 | 0.13404615  | 0 | -0.13975815  | 0 | 0.05978718   | 0 | 0           |
| 0 | 0            | 0 | 0           | 0 | 0.03151689   | 0 | 0.041268584  | 0 | -0.62645486 |
| 0 | -0.038377162 | 0 | 0           | 0 | 0            | 0 | 0            | 0 | -0.6267407  |
| 0 | -0.032129473 | 0 | 0           | 0 | 0.012683836  | 0 | 0            | 0 | -0.62614902 |
| 0 | -0.031749983 | 0 | 0           | 0 | 0.01128577   | 0 | 0            | 0 | -0.62637173 |
| 0 | -0.032702519 | 0 | 0           | 0 | 0.012172395  | 0 | 0            | 0 | -0.626775   |
| 0 | 0            | 0 | 0           | 0 | 0            | 0 | 0.042424623  | 0 | -0.62647691 |
| 0 | -0.054103077 | 0 | 0           | 0 | -0.030033184 | 0 | 0.01920951   | 0 | -0.62631209 |
| 0 | 0            | 0 | 0           | 0 | 0.0337907    | 0 | 0            | 0 | -0.62637758 |
| 0 | -0.053311766 | 0 | 0           | 0 | -0.031079358 | 0 | 0.01921769   | 0 | -0.62670224 |
| 0 | -0.054322075 | 0 | 0           | 0 | -0.03019539  | 0 | 0.019941217  | 0 | -0.62669515 |
| 0 | -0.048689753 | 0 | 0           | 0 | -0.020090388 | 0 | 0            | 0 | -0.62668582 |
| 0 | -0.03779602  | 0 | 0           | 0 | 0            | 0 | 0.040466368  | 0 | -0.14540873 |
| 0 | -0.032411381 | 0 | 0           | 0 | 0.010488039  | 0 | 0.041196413  | 0 | -0.14782921 |
| 0 | -0.039034223 | 0 | 0           | 0 | 0            | 0 | 0.00180084   | 0 | -0.62669514 |
| 0 | -0.031962816 | 0 | 0           | 0 | 0.009252362  | 0 | 0.039827876  | 0 | -0.15111183 |
| 0 | -0.033120665 | 0 | 0           | 0 | 0.010025101  | 0 | 0.04049      | 0 | -0.15018025 |
| 0 | 0            | 0 | 0           | 0 | 0.031876563  | 0 | 0.037936766  | 0 | -0.18160521 |
| 0 | -0.030350347 | 0 | 0           | 0 | 0.014060103  | 0 | 0            | 0 | -0.15391826 |
| 0 | -0.041971132 | 0 | 0           | 0 | 0            | 0 | 0.039724203  | 0 | 0           |
| 0 | -0.038645061 | 0 | 0           | 0 | 0.006379601  | 0 | 0.040600361  | 0 | 0           |
| 0 | -0.038197858 | 0 | 0           | 0 | 0.005114769  | 0 | 0.039339517  | 0 | 0           |
| 0 | -0.03935663  | 0 | 0           | 0 | 0.005904715  | 0 | 0.040004051  | 0 | 0           |
| 0 | 0            | 0 | 0           | 0 | -0.006414488 | 0 | 0.004441623  | 0 | -0.62615277 |
| 0 | -0.051968132 | 0 | 0           | 0 | -0.02827707  | 0 | 0.016236686  | 0 | -0.12849717 |
| 0 | 0            | 0 | 0           | 0 | 0.031871734  | 0 | 0.03682239   | 0 | 0           |
| 0 | -0.03637151  | 0 | 0           | 0 | 0.010059039  | 0 | 0            | 0 | 0           |
| 0 | -0.056685102 | 0 | 0           | 0 | -0.029848671 | 0 | 0.017287534  | 0 | 0           |
| 0 | -0.023640857 | 0 | 0.14353952  | 0 | -0.19439219  | 0 | 0.064743013  | 0 | -0.62646624 |
| 0 | 0            | 0 | 0.14433919  | 0 | -0.17907588  | 0 | 0.062408277  | 0 | -0.62632805 |
| 0 | -0.099934514 | 0 | 0.057148295 | 0 | 0            | 0 | 0.039231654  | 0 | 0           |
| 0 | -0.021016375 | 0 | 0.16718002  | 0 | -0.21297467  | 0 | 0.064377936  | 0 | -0.62641763 |
| 0 | -0.007231523 | 0 | 0.1226139   | 0 | -0.14785884  | 0 | 0.087925556  | 0 | -0.62621062 |
| 0 | -0.1310979   | 0 | 0           | 0 | -0.056198415 | 0 | 0.04839643   | 0 | 0           |
| 0 | -0.021602434 | 0 | 0.14352824  | 0 | -0.19269591  | 0 | 0.061156987  | 0 | -0.13849067 |
| 0 | -0.019337711 | 0 | 0.14916031  | 0 | -0.19831208  | 0 | 0            | 0 | -0.62634698 |
| 0 | -0.028322732 | 0 | 0           | 0 | 0.013953848  | 0 | 0.046085696  | 0 | -0.62689424 |
| 0 | -0.022886189 | 0 | 0           | 0 | 0.025250555  | 0 | 0.053866674  | 0 | -0.62686334 |
| 0 | -0.021551073 | 0 | 0           | 0 | 0.024276626  | 0 | 0.053379212  | 0 | -0.62696025 |
| 0 | -0.035022387 | 0 | 0           | 0 | 0            | 0 | 0.055176088  | 0 | -0.62688973 |

|   |              |   |             |   |              |   |             |   |             |
|---|--------------|---|-------------|---|--------------|---|-------------|---|-------------|
| 0 | 0            | 0 | 0           | 0 | 0.040448241  | 0 | 0.051718477 | 0 | -0.62637681 |
| 0 | -0.022238801 | 0 | 0           | 0 | 0.025801017  | 0 | 0.055685736 | 0 | -0.62638439 |
| 0 | -0.027518242 | 0 | 0.14499308  | 0 | -0.19811055  | 0 | 0.060717611 | 0 | 0           |
| 0 | -0.019248842 | 0 | 0           | 0 | 0.030905247  | 0 | 0           | 0 | -0.62607902 |
| 0 | -0.020176844 | 0 | 0           | 0 | 0.027580841  | 0 | 0.050354668 | 0 | -0.16102872 |
| 0 | -0.026549118 | 0 | 0           | 0 | 0.023404749  | 0 | 0.049834438 | 0 | 0           |
| 0 | 0            | 0 | 0.19732114  | 0 | -0.1509847   | 0 | 0.034382897 | 0 | 0           |
| 0 | -0.027552282 | 0 | 0           | 0 | -0.070589853 | 0 | 0.074239544 | 0 | -0.6266462  |
| 0 | 0.038323638  | 0 | 0.043370851 | 0 | 0            | 0 | 0.069621637 | 0 | -0.62716988 |
| 0 | -0.029233374 | 0 | 0.1326134   | 0 | -0.10531889  | 0 | 0.037659476 | 0 | -0.62672007 |
| 0 | -0.029712965 | 0 | 0.13406161  | 0 | -0.10974379  | 0 | 0.034885823 | 0 | -0.62678426 |
| 0 | -0.030376329 | 0 | 0.13470718  | 0 | -0.11146609  | 0 | 0.03554888  | 0 | -0.62623939 |
| 0 | -0.030888537 | 0 | 0.13379705  | 0 | -0.10869224  | 0 | 0.035673346 | 0 | -0.62665272 |
| 0 | -0.031376364 | 0 | 0.1345572   | 0 | -0.11060809  | 0 | 0.036323869 | 0 | -0.62644711 |
| 0 | -0.022528923 | 0 | 0.15251348  | 0 | -0.11159786  | 0 | 0.041748333 | 0 | -0.62674501 |
| 0 | -0.028530114 | 0 | 0.15489988  | 0 | -0.12572006  | 0 | 0.035902926 | 0 | -0.62633916 |
| 0 | -0.027993626 | 0 | 0.15479107  | 0 | -0.12680517  | 0 | 0.034384722 | 0 | -0.62669538 |
| 0 | 0            | 0 | 0.14022735  | 0 | -0.099421173 | 0 | 0.027486065 | 0 | -0.62632196 |
| 0 | 0            | 0 | 0.13558844  | 0 | -0.09069229  | 0 | 0.033620297 | 0 | -0.62631421 |
| 0 | -0.029288828 | 0 | 0.15419359  | 0 | -0.12562328  | 0 | 0.035030499 | 0 | -0.62643237 |
| 0 | 0            | 0 | 0.13579861  | 0 | -0.092242008 | 0 | 0.032268614 | 0 | -0.62634357 |
| 0 | -0.028357208 | 0 | 0.13737379  | 0 | -0.11073461  | 0 | 0           | 0 | -0.62641272 |
| 0 | -0.028626924 | 0 | 0.13725239  | 0 | -0.10929661  | 0 | 0           | 0 | -0.62638973 |
| 0 | -0.021946621 | 0 | 0.12907814  | 0 | -0.087754241 | 0 | 0           | 0 | -0.62623225 |
| 0 | 0            | 0 | 0.1356805   | 0 | -0.090772183 | 0 | 0.032928261 | 0 | -0.62632491 |
| 0 | 0            | 0 | 0.15357529  | 0 | -0.10567846  | 0 | 0.032515052 | 0 | -0.62630686 |
| 0 | -0.029461494 | 0 | 0.13725051  | 0 | -0.10986262  | 0 | 0           | 0 | -0.6264033  |
| 0 | -0.026536433 | 0 | 0.15717965  | 0 | -0.12463538  | 0 | 0           | 0 | -0.62661196 |
| 0 | 0            | 0 | 0.13802655  | 0 | -0.091105288 | 0 | 0           | 0 | -0.62624845 |
| 0 | -0.028404199 | 0 | 0.13391792  | 0 | -0.10678622  | 0 | 0.031891945 | 0 | -0.12854373 |
| 0 | -0.028748639 | 0 | 0.13452194  | 0 | -0.10838663  | 0 | 0.032707748 | 0 | -0.12505696 |
| 0 | -0.0283294   | 0 | 0.13474535  | 0 | -0.10973637  | 0 | 0.03126179  | 0 | -0.12835478 |
| 0 | -0.029445223 | 0 | 0.13458288  | 0 | -0.10889069  | 0 | 0.031961206 | 0 | -0.12749384 |
| 0 | -0.026647564 | 0 | 0.15439103  | 0 | -0.12358317  | 0 | 0.031418179 | 0 | -0.12591811 |
| 0 | 0            | 0 | 0.13550215  | 0 | -0.090252768 | 0 | 0.029554248 | 0 | -0.15523038 |
| 0 | -0.02711386  | 0 | 0.13696227  | 0 | -0.10778676  | 0 | 0           | 0 | -0.13006553 |
| 0 | -0.033210608 | 0 | 0.13387157  | 0 | -0.10839084  | 0 | 0.032957204 | 0 | 0           |
| 0 | -0.034638204 | 0 | 0.13594399  | 0 | -0.11357341  | 0 | 0.032186301 | 0 | 0           |
| 0 | 0            | 0 | 0.082885626 | 0 | 0            | 0 | 0.032902611 | 0 | -0.62637441 |
| 0 | -0.034224936 | 0 | 0.13618337  | 0 | -0.11497179  | 0 | 0.030846598 | 0 | 0           |
| 0 | -0.000350531 | 0 | 0.082565113 | 0 | 0            | 0 | 0.034386561 | 0 | -0.62652842 |
| 0 | -0.035340615 | 0 | 0.13600968  | 0 | -0.11409327  | 0 | 0.031542616 | 0 | 0           |
| 0 | 0.000821491  | 0 | 0.082049259 | 0 | 0            | 0 | 0.033027366 | 0 | -0.62691532 |
| 0 | -0.032566133 | 0 | 0.15546327  | 0 | -0.12850645  | 0 | 0.031009967 | 0 | 0           |
| 0 | -0.000741109 | 0 | 0.082410042 | 0 | 0            | 0 | 0.033747867 | 0 | -0.62690786 |
| 0 | -0.032842159 | 0 | 0.13830427  | 0 | -0.11281967  | 0 | 0           | 0 | 0           |
| 0 | 0            | 0 | 0.13723329  | 0 | -0.091819325 | 0 | 0.028562515 | 0 | 0           |

|   |              |   |             |              |              |              |   |             |
|---|--------------|---|-------------|--------------|--------------|--------------|---|-------------|
| 0 | 0.001450171  | 0 | 0.08549018  | 0            | 0            | 0            | 0 | -0.62681706 |
| 0 | 0.014778953  | 0 | 0.11208184  | 0            | 0            | 0.033126477  | 0 | -0.62693674 |
| 0 | 0.001227486  | 0 | 0.083442721 | 0            | 0            | 0.030206522  | 0 | -0.16746467 |
| 0 | -0.00359893  | 0 | 0.075728083 | 0            | 0            | -0.014523465 | 0 | -0.62672589 |
| 0 | -0.003492301 | 0 | 0.082379311 | 0            | 0            | 0.029449893  | 0 | 0           |
| 0 | -0.11017505  | 0 | 0.15236723  | 0            | -0.17960976  | 0.037227975  | 0 | 0           |
| 0 | -0.039198846 | 0 | 0           | 0            | 0            | 0.043210947  | 0 | -0.62636133 |
| 0 | -0.034638419 | 0 | 0           | 0.008669357  | 0            | 0.044030884  | 0 | -0.62658309 |
| 0 | -0.034051454 | 0 | 0           | 0.007451763  | 0            | 0.042723562  | 0 | -0.62687438 |
| 0 | -0.035210532 | 0 | 0           | 0.008230288  | 0            | 0.043387937  | 0 | -0.62687027 |
| 0 | 0            | 0 | 0           | 0.031641411  | 0            | 0.040540461  | 0 | -0.62645325 |
| 0 | -0.032421567 | 0 | 0           | 0.012552789  | 0            | 0            | 0 | -0.6262373  |
| 0 | -0.054041341 | 0 | 0           | -0.030214833 | 0            | 0.018970367  | 0 | -0.62669996 |
| 0 | -0.032572127 | 0 | 0           | 0.010508208  | 0            | 0.039757127  | 0 | -0.15053771 |
| 0 | -0.038812359 | 0 | 0           | 0.006385597  | 0            | 0.039272362  | 0 | 0           |
| 0 | -0.023706781 | 0 | 0.14358675  | 0            | -0.19454793  | 0.06401552   | 0 | -0.62648374 |
| 0 | -0.022631065 | 0 | 0           | 0.025662141  | 0            | 0.053195516  | 0 | -0.62639983 |
| 0 | -0.030478045 | 0 | 0.13410619  | 0            | -0.10884823  | 0.034666965  | 0 | -0.62672219 |
| 0 | -0.03087587  | 0 | 0.13455031  | 0            | -0.11014014  | 0.035547658  | 0 | -0.62635475 |
| 0 | -0.030424052 | 0 | 0.13479248  | 0            | -0.1115104   | 0.03415425   | 0 | -0.62646138 |
| 0 | -0.031539735 | 0 | 0.13462225  | 0            | -0.1106447   | 0.034849642  | 0 | -0.62645832 |
| 0 | -0.0286087   | 0 | 0.15440166  | 0            | -0.12526067  | 0.034338024  | 0 | -0.62669797 |
| 0 | 0            | 0 | 0.13565837  | 0            | -0.090630312 | 0.03219528   | 0 | -0.62632402 |
| 0 | -0.028943382 | 0 | 0.13719512  | 0            | -0.10938306  | 0            | 0 | -0.62640177 |
| 0 | -0.028907009 | 0 | 0.13458355  | 0            | -0.1084146   | 0.031220701  | 0 | -0.12783862 |
| 0 | -0.034803442 | 0 | 0.13600773  | 0            | -0.11361665  | 0.030803164  | 0 | 0           |
| 0 | -0.000327299 | 0 | 0.082630695 | 0            | 0            | 0.032984248  | 0 | -0.62691039 |
| 0 | -0.034798806 | 0 | 0           | 0.008681827  | 0            | 0.042631979  | 0 | -0.62659977 |
| 0 | -0.031042359 | 0 | 0.13461586  | 0            | -0.11017907  | 0.034098862  | 0 | -0.62636464 |

| SE | bsnp_rs6469674 | SE | bsnp_rs13269857 | SE | bsnp_rs3020106 | SE | bsnp_rs3020119 | SE |
|----|----------------|----|-----------------|----|----------------|----|----------------|----|
| 0  | 0              | 0  | 0               | 0  | 0              | 0  | 0              | 0  |
| 0  | 0              | 0  | 0.18543255      | 0  | 0              | 0  | 0              | 0  |
| 0  | 0              | 0  | 0               | 0  | 0.18527184     | 0  | 0              | 0  |
| 0  | 0              | 0  | 0               | 0  | 0              | 0  | 0              | 0  |
| 0  | 0              | 0  | 0               | 0  | 0              | 0  | 0              | 0  |
| 0  | 0              | 0  | 0               | 0  | 0              | 0  | 0              | 0  |
| 0  | 0              | 0  | 0               | 0  | 0              | 0  | 0              | 0  |
| 0  | -0.19611356    | 0  | 0               | 0  | 0              | 0  | 0              | 0  |
| 0  | 0              | 0  | 0               | 0  | 0              | 0  | 0              | 0  |
| 0  | 0              | 0  | 0               | 0  | 0              | 0  | 0              | 0  |
| 0  | 0              | 0  | 0               | 0  | 0              | 0  | -0.068743798   | 0  |
| 0  | 0              | 0  | 0               | 0  | 0              | 0  | 0              | 0  |
| 0  | 0              | 0  | 0               | 0  | 0              | 0  | 0              | 0  |
| 0  | 0              | 0  | 0.17132422      | 0  | 0              | 0  | 0              | 0  |
| 0  | -0.18654683    | 0  | 0               | 0  | 0              | 0  | 0              | 0  |
| 0  | 0              | 0  | 0               | 0  | 0.1712007      | 0  | 0              | 0  |
| 0  | -0.17500733    | 0  | 0.17144609      | 0  | 0              | 0  | 0              | 0  |
| 0  | 0              | 0  | 0               | 0  | 0.16187236     | 0  | 0              | 0  |
| 0  | 0              | 0  | 0.16087938      | 0  | 0              | 0  | 0              | 0  |
| 0  | -0.1753491     | 0  | 0               | 0  | 0.171321       | 0  | 0              | 0  |
| 0  | 0              | 0  | 0               | 0  | 0              | 0  | 0              | 0  |
| 0  | 0              | 0  | 0               | 0  | 0              | 0  | 0              | 0  |
| 0  | -0.17192507    | 0  | 0               | 0  | 0              | 0  | 0              | 0  |
| 0  | -0.18171557    | 0  | 0               | 0  | 0              | 0  | 0              | 0  |
| 0  | 0              | 0  | 0.21238449      | 0  | 0              | 0  | 0              | 0  |
| 0  | 0              | 0  | 0.13571864      | 0  | 0              | 0  | 0              | 0  |
| 0  | 0              | 0  | 0               | 0  | 0.13564761     | 0  | 0              | 0  |
| 0  | 0              | 0  | 0               | 0  | 0.21332082     | 0  | 0              | 0  |
| 0  | 0              | 0  | 0               | 0  | 0              | 0  | 0              | 0  |
| 0  | -0.18364505    | 0  | 0               | 0  | 0              | 0  | 0              | 0  |
| 0  | 0              | 0  | 0.14000914      | 0  | 0              | 0  | 0              | 0  |
| 0  | 0              | 0  | 0               | 0  | 0.13968765     | 0  | 0              | 0  |
| 0  | 0              | 0  | 0               | 0  | 0              | 0  | 0              | 0  |
| 0  | 0              | 0  | 0.17202934      | 0  | 0              | 0  | 0              | 0  |
| 0  | 0              | 0  | 0               | 0  | 0.17260481     | 0  | 0              | 0  |
| 0  | 0              | 0  | 0.14626076      | 0  | 0              | 0  | 0              | 0  |
| 0  | 0              | 0  | 0               | 0  | 0.14592393     | 0  | 0              | 0  |
| 0  | 0              | 0  | 0               | 0  | 0              | 0  | -0.083873198   | 0  |
| 0  | -0.21441195    | 0  | 0               | 0  | 0              | 0  | -0.083615869   | 0  |
| 0  | 0              | 0  | 0               | 0  | 0              | 0  | 0              | 0  |
| 0  | -0.19213182    | 0  | 0               | 0  | 0              | 0  | 0              | 0  |
| 0  | 0              | 0  | 0.17107339      | 0  | 0              | 0  | -0.031980927   | 0  |
| 0  | 0              | 0  | 0               | 0  | 0.17061748     | 0  | -0.033474938   | 0  |
| 0  | 0              | 0  | 0               | 0  | 0              | 0  | 0              | 0  |
| 0  | 0              | 0  | 0.14133624      | 0  | 0.045018179    | 0  | 0              | 0  |

|   |             |   |            |   |            |              |   |
|---|-------------|---|------------|---|------------|--------------|---|
| 0 | 0           | 0 | 0          | 0 | 0          | 0            | 0 |
| 0 | 0           | 0 | 0          | 0 | 0          | 0            | 0 |
| 0 | 0           | 0 | 0          | 0 | 0          | 0            | 0 |
| 0 | 0           | 0 | 0          | 0 | 0          | 0            | 0 |
| 0 | 0           | 0 | 0          | 0 | 0          | 0            | 0 |
| 0 | 0           | 0 | 0          | 0 | 0          | 0.024838021  | 0 |
| 0 | 0           | 0 | 0          | 0 | 0          | 0            | 0 |
| 0 | 0           | 0 | 0          | 0 | 0          | 0            | 0 |
| 0 | 0           | 0 | 0          | 0 | 0          | 0            | 0 |
| 0 | 0           | 0 | 0          | 0 | 0          | 0            | 0 |
| 0 | 0           | 0 | 0          | 0 | 0          | 0            | 0 |
| 0 | 0           | 0 | 0          | 0 | 0          | -0.003662686 | 0 |
| 0 | 0           | 0 | 0          | 0 | 0          | 0            | 0 |
| 0 | -0.25721841 | 0 | 0          | 0 | 0          | 0            | 0 |
| 0 | 0           | 0 | 0          | 0 | 0          | 0            | 0 |
| 0 | 0           | 0 | 0          | 0 | 0          | 0.025329696  | 0 |
| 0 | 0.42756158  | 0 | 0          | 0 | 0          | 0            | 0 |
| 0 | 0           | 0 | 0          | 0 | 0          | 0            | 0 |
| 0 | 0           | 0 | 0          | 0 | 0          | 0            | 0 |
| 0 | 0           | 0 | 0          | 0 | 0          | 0.028515315  | 0 |
| 0 | 0           | 0 | 0          | 0 | 0          | -0.084600756 | 0 |
| 0 | 0           | 0 | 0          | 0 | 0          | 0            | 0 |
| 0 | 0           | 0 | 0          | 0 | 0.15153413 | 0            | 0 |
| 0 | 0           | 0 | 0.15062916 | 0 | 0          | 0            | 0 |
| 0 | -0.15702657 | 0 | 0          | 0 | 0.15160042 | 0            | 0 |
| 0 | -0.15714527 | 0 | 0.15069299 | 0 | 0          | 0            | 0 |
| 0 | 0           | 0 | 0          | 0 | 0          | -0.031422343 | 0 |
| 0 | 0           | 0 | 0.12194672 | 0 | 0          | 0            | 0 |
| 0 | 0           | 0 | 0          | 0 | 0.12198914 | 0            | 0 |
| 0 | -0.17428736 | 0 | 0.12204602 | 0 | 0          | 0            | 0 |
| 0 | -0.17442235 | 0 | 0          | 0 | 0.1220755  | 0            | 0 |
| 0 | 0           | 0 | 0          | 0 | 0.16232476 | 0            | 0 |
| 0 | 0           | 0 | 0          | 0 | 0.18738491 | 0            | 0 |
| 0 | 0           | 0 | 0.16118121 | 0 | 0          | 0            | 0 |
| 0 | 0           | 0 | 0.18571735 | 0 | 0          | 0            | 0 |
| 0 | 0           | 0 | 0.12848585 | 0 | 0          | 0            | 0 |
| 0 | 0           | 0 | 0          | 0 | 0.12825901 | 0            | 0 |
| 0 | 0           | 0 | 0.15829086 | 0 | 0          | 0            | 0 |
| 0 | 0           | 0 | 0          | 0 | 0.15891299 | 0            | 0 |
| 0 | -0.17143219 | 0 | 0.12870441 | 0 | 0          | 0            | 0 |
| 0 | -0.17151074 | 0 | 0          | 0 | 0.12847327 | 0            | 0 |
| 0 | 0           | 0 | 0.13426461 | 0 | 0          | 0            | 0 |
| 0 | 0           | 0 | 0          | 0 | 0.13402757 | 0            | 0 |
| 0 | -0.17353396 | 0 | 0.15838969 | 0 | 0          | 0            | 0 |
| 0 | -0.17365587 | 0 | 0          | 0 | 0.15901226 | 0            | 0 |
| 0 | -0.17215561 | 0 | 0.13431364 | 0 | 0          | 0            | 0 |
| 0 | -0.17223925 | 0 | 0          | 0 | 0.13406735 | 0            | 0 |
| 0 | 0           | 0 | 0.14758056 | 0 | 0          | -0.050487314 | 0 |

|   |             |   |             |   |             |   |              |   |
|---|-------------|---|-------------|---|-------------|---|--------------|---|
| 0 | 0           | 0 | 0           | 0 | 0.1474413   | 0 | -0.051763555 | 0 |
| 0 | 0           | 0 | 0.16257116  | 0 | 0           | 0 | 0            | 0 |
| 0 | 0           | 0 | 0           | 0 | 0.16284754  | 0 | 0            | 0 |
| 0 | -0.18899182 | 0 | 0.14784561  | 0 | 0           | 0 | -0.050162629 | 0 |
| 0 | -0.18956431 | 0 | 0           | 0 | 0.14770102  | 0 | -0.051442601 | 0 |
| 0 | 0.4371302   | 0 | 0           | 0 | 0           | 0 | 0            | 0 |
| 0 | 0           | 0 | 0           | 0 | 0           | 0 | 0            | 0 |
| 0 | 0           | 0 | 0           | 0 | 0.16628027  | 0 | 0            | 0 |
| 0 | 0           | 0 | 0           | 0 | 0           | 0 | 0            | 0 |
| 0 | 0           | 0 | 0.16542816  | 0 | 0           | 0 | 0            | 0 |
| 0 | 0.44862464  | 0 | 0.17170315  | 0 | 0           | 0 | 0            | 0 |
| 0 | 0           | 0 | 0           | 0 | 0           | 0 | 0            | 0 |
| 0 | 0           | 0 | 0           | 0 | 0           | 0 | 0            | 0 |
| 0 | -0.1863948  | 0 | 0           | 0 | 0           | 0 | 0            | 0 |
| 0 | 0           | 0 | 0           | 0 | 0.17221706  | 0 | 0.032765348  | 0 |
| 0 | 0           | 0 | 0.17159291  | 0 | 0           | 0 | 0.033486565  | 0 |
| 0 | 0.44828356  | 0 | 0           | 0 | 0.17157748  | 0 | 0            | 0 |
| 0 | 0           | 0 | 0           | 0 | 0           | 0 | -0.005076673 | 0 |
| 0 | 0           | 0 | 0           | 0 | 0           | 0 | 0            | 0 |
| 0 | -0.1844422  | 0 | 0           | 0 | 0           | 0 | 0            | 0 |
| 0 | 0           | 0 | 0           | 0 | 0.17965582  | 0 | 0            | 0 |
| 0 | 0           | 0 | 0.17936928  | 0 | 0           | 0 | 0            | 0 |
| 0 | -0.18231967 | 0 | 0           | 0 | 0           | 0 | 0            | 0 |
| 0 | 0           | 0 | 0           | 0 | 0.17241425  | 0 | 0            | 0 |
| 0 | 0           | 0 | 0.1777689   | 0 | 0           | 0 | 0            | 0 |
| 0 | 0           | 0 | 0.17157181  | 0 | 0           | 0 | 0            | 0 |
| 0 | 0           | 0 | 0.12952658  | 0 | 0.042671538 | 0 | 0            | 0 |
| 0 | -0.2007674  | 0 | 0           | 0 | 0           | 0 | 0            | 0 |
| 0 | -0.18780396 | 0 | 0           | 0 | 0           | 0 | -0.004512628 | 0 |
| 0 | -0.18671928 | 0 | 0           | 0 | 0           | 0 | 0            | 0 |
| 0 | 0           | 0 | 0           | 0 | 0.17815442  | 0 | 0            | 0 |
| 0 | -0.1519241  | 0 | 0.17918462  | 0 | 0           | 0 | 0            | 0 |
| 0 | 0           | 0 | 0           | 0 | 0.16979529  | 0 | 0            | 0 |
| 0 | 0           | 0 | 0.16939942  | 0 | 0           | 0 | 0            | 0 |
| 0 | 0           | 0 | 0.072074097 | 0 | 0.090516442 | 0 | 0            | 0 |
| 0 | -0.17497424 | 0 | 0.12963156  | 0 | 0.042688299 | 0 | 0            | 0 |
| 0 | 0           | 0 | 0           | 0 | 0.1626553   | 0 | 0            | 0 |
| 0 | 0           | 0 | 0.16147088  | 0 | 0           | 0 | 0            | 0 |
| 0 | -0.15116437 | 0 | 0           | 0 | 0.17960228  | 0 | 0            | 0 |
| 0 | 0           | 0 | 0           | 0 | 0           | 0 | 0            | 0 |
| 0 | 0           | 0 | 0           | 0 | 0           | 0 | 0            | 0 |
| 0 | -0.17326612 | 0 | 0           | 0 | 0           | 0 | 0            | 0 |
| 0 | -0.24650208 | 0 | 0           | 0 | 0           | 0 | 0            | 0 |
| 0 | 0           | 0 | 0           | 0 | 0.20067557  | 0 | 0            | 0 |
| 0 | 0           | 0 | 0.19933639  | 0 | 0           | 0 | 0            | 0 |
| 0 | 0           | 0 | 0           | 0 | 0.19453084  | 0 | -0.049820292 | 0 |
| 0 | 0           | 0 | 0.19356488  | 0 | 0           | 0 | -0.048206696 | 0 |





|   |             |   |             |   |             |              |              |
|---|-------------|---|-------------|---|-------------|--------------|--------------|
| 0 | 0           | 0 | 0           | 0 | 0           | 0            | 0            |
| 0 | 0           | 0 | 0           | 0 | 0           | -0.079308021 | 0            |
| 0 | 0           | 0 | 0.14541072  | 0 | 0           | 0.02386756   | 0            |
| 0 | 0.40894037  | 0 | 0           | 0 | 0           | -0.083817132 | 0            |
| 0 | 0           | 0 | 0           | 0 | 0           | 0            | 0            |
| 0 | 0           | 0 | 0.15959162  | 0 | 0           | 0            | 0            |
| 0 | 0           | 0 | 0           | 0 | 0.16014385  | 0            | 0            |
| 0 | 0           | 0 | 0.17606798  | 0 | 0           | 0.013320034  | 0            |
| 0 | 0           | 0 | 0           | 0 | 0.14484629  | 0            | 0.023609654  |
| 0 | 0           | 0 | 0.089559819 | 0 | 0.083966414 | 0            | 0            |
| 0 | 0           | 0 | 0           | 0 | 0.17655448  | 0            | 0.013116311  |
| 0 | 0           | 0 | 0.085447906 | 0 | 0.061910119 | 0            | 0            |
| 0 | -0.20776361 | 0 | 0           | 0 | 0           | -0.061248918 | 0            |
| 0 | -0.26478055 | 0 | 0           | 0 | 0           | 0            | 0            |
| 0 | -0.24792751 | 0 | 0           | 0 | 0           | -0.079430821 | 0            |
| 0 | 0           | 0 | 0           | 0 | 0           | 0            | 0            |
| 0 | 0           | 0 | 0           | 0 | 0           | 0            | 0            |
| 0 | 0           | 0 | 0           | 0 | 0           | 0            | 0            |
| 0 | 0.43156018  | 0 | 0           | 0 | 0           | 0            | 0            |
| 0 | 0           | 0 | 0           | 0 | 0           | 0            | 0            |
| 0 | 0           | 0 | 0.11793785  | 0 | 0.054143528 | 0            | -0.032205471 |
| 0 | 0           | 0 | 0           | 0 | 0           | 0            | 0            |
| 0 | 0           | 0 | 0           | 0 | 0           | 0            | 0            |
| 0 | 0           | 0 | 0           | 0 | 0           | 0            | 0            |
| 0 | 0           | 0 | 0           | 0 | 0           | 0.007748549  | 0            |
| 0 | 0           | 0 | 0           | 0 | 0           | 0.046828501  | 0            |
| 0 | 0           | 0 | 0           | 0 | 0           | -0.034755878 | 0            |
| 0 | 0           | 0 | 0           | 0 | 0           | 0            | 0            |
| 0 | 0           | 0 | 0           | 0 | 0           | 0            | 0            |
| 0 | 0           | 0 | 0           | 0 | 0           | 0.027209898  | 0            |
| 0 | 0           | 0 | 0           | 0 | 0           | 0.036434941  | 0            |
| 0 | 0           | 0 | 0           | 0 | 0           | 0            | 0            |
| 0 | 0           | 0 | 0           | 0 | 0           | 0            | 0            |
| 0 | 0           | 0 | 0           | 0 | 0           | 0            | 0            |
| 0 | 0           | 0 | 0           | 0 | 0           | 0.036463777  | 0            |
| 0 | 0           | 0 | 0           | 0 | 0           | 0.017310652  | 0            |
| 0 | 0           | 0 | 0           | 0 | 0           | 0.009518523  | 0            |
| 0 | 0           | 0 | 0           | 0 | 0           | -0.021482461 | 0            |
| 0 | 0           | 0 | 0           | 0 | 0           | 0.029387395  | 0            |
| 0 | 0.36425604  | 0 | 0           | 0 | 0           | 0            | 0            |
| 0 | 0           | 0 | 0           | 0 | 0           | 0            | 0            |
| 0 | 0           | 0 | 0           | 0 | 0           | 0.034319965  | 0            |
| 0 | 0           | 0 | 0           | 0 | 0           | 0.0201263    | 0            |
| 0 | 0           | 0 | 0           | 0 | 0           | 0.027403036  | 0            |
| 0 | 0           | 0 | 0           | 0 | 0           | -0.062868231 | 0            |
| 0 | 0           | 0 | 0.15253768  | 0 | 0           | 0            | 0            |

|   |             |   |             |   |             |   |             |   |
|---|-------------|---|-------------|---|-------------|---|-------------|---|
| 0 | 0           | 0 | 0           | 0 | 0.1529016   | 0 | 0           | 0 |
| 0 | -0.14656001 | 0 | 0.15262698  | 0 | 0           | 0 | 0           | 0 |
| 0 | -0.14680598 | 0 | 0           | 0 | 0.15298689  | 0 | 0           | 0 |
| 0 | 0.46644318  | 0 | 0           | 0 | 0.15191617  | 0 | 0           | 0 |
| 0 | 0.46646697  | 0 | 0.15101448  | 0 | 0           | 0 | 0           | 0 |
| 0 | 0           | 0 | 0           | 0 | 0.16378446  | 0 | 0           | 0 |
| 0 | 0           | 0 | 0.16348233  | 0 | 0           | 0 | 0           | 0 |
| 0 | 0           | 0 | 0           | 0 | 0.14164161  | 0 | 0           | 0 |
| 0 | 0           | 0 | 0.14064032  | 0 | 0           | 0 | 0           | 0 |
| 0 | 0           | 0 | 0.068901527 | 0 | 0.083314031 | 0 | 0           | 0 |
| 0 | 0           | 0 | 0           | 0 | 0.15469428  | 0 | 0           | 0 |
| 0 | 0           | 0 | 0           | 0 | 0.1496023   | 0 | 0           | 0 |
| 0 | 0           | 0 | 0           | 0 | 0.15250612  | 0 | 0.00287036  | 0 |
| 0 | 0           | 0 | 0.15430584  | 0 | 0           | 0 | 0           | 0 |
| 0 | 0           | 0 | 0.14829338  | 0 | 0           | 0 | 0           | 0 |
| 0 | 0           | 0 | 0.15185     | 0 | 0           | 0 | 0.003531335 | 0 |
| 0 | -0.15461242 | 0 | 0           | 0 | 0.16394101  | 0 | 0           | 0 |
| 0 | -0.1546166  | 0 | 0.1636655   | 0 | 0           | 0 | 0           | 0 |
| 0 | -0.16057796 | 0 | 0           | 0 | 0.14193489  | 0 | 0           | 0 |
| 0 | -0.16075024 | 0 | 0.14092704  | 0 | 0           | 0 | 0           | 0 |
| 0 | -0.15696759 | 0 | 0.068745593 | 0 | 0.083535155 | 0 | 0           | 0 |
| 0 | -0.15653229 | 0 | 0           | 0 | 0.15507177  | 0 | 0           | 0 |
| 0 | -0.15563391 | 0 | 0           | 0 | 0.15281162  | 0 | 0.003563859 | 0 |
| 0 | -0.15854718 | 0 | 0           | 0 | 0.15103876  | 0 | 0           | 0 |
| 0 | -0.15659169 | 0 | 0.15465101  | 0 | 0           | 0 | 0           | 0 |
| 0 | -0.15549817 | 0 | 0.15214011  | 0 | 0           | 0 | 0.004211782 | 0 |
| 0 | -0.15987319 | 0 | 0.14969829  | 0 | 0           | 0 | 0           | 0 |
| 0 | 0.44921715  | 0 | 0.12238952  | 0 | 0           | 0 | 0           | 0 |
| 0 | 0.44923523  | 0 | 0           | 0 | 0.12241811  | 0 | 0           | 0 |
| 0 | 0           | 0 | 0.13245035  | 0 | 0           | 0 | 0           | 0 |
| 0 | 0           | 0 | 0           | 0 | 0.13320434  | 0 | 0           | 0 |
| 0 | 0           | 0 | 0.12737426  | 0 | 0           | 0 | 0           | 0 |
| 0 | 0           | 0 | 0           | 0 | 0.12684074  | 0 | 0           | 0 |
| 0 | -0.13602669 | 0 | 0.13369655  | 0 | 0           | 0 | 0           | 0 |
| 0 | -0.13469049 | 0 | 0           | 0 | 0.13447524  | 0 | 0           | 0 |
| 0 | 0           | 0 | 0.071072833 | 0 | 0.051923034 | 0 | 0           | 0 |
| 0 | 0           | 0 | 0.12059049  | 0 | 0           | 0 | 0           | 0 |
| 0 | 0           | 0 | 0.12235111  | 0 | 0           | 0 | 0.003938399 | 0 |
| 0 | 0           | 0 | 0.12263535  | 0 | 0           | 0 | 0           | 0 |
| 0 | 0           | 0 | 0           | 0 | 0.12090367  | 0 | 0           | 0 |
| 0 | 0           | 0 | 0           | 0 | 0.12227156  | 0 | 0.003082871 | 0 |
| 0 | -0.17557788 | 0 | 0.12741684  | 0 | 0           | 0 | 0           | 0 |
| 0 | 0           | 0 | 0           | 0 | 0.12229115  | 0 | 0           | 0 |
| 0 | -0.17567766 | 0 | 0           | 0 | 0.12688505  | 0 | 0           | 0 |
| 0 | -0.17423768 | 0 | 0.071115079 | 0 | 0.051961294 | 0 | 0           | 0 |
| 0 | -0.17440008 | 0 | 0.12070158  | 0 | 0           | 0 | 0           | 0 |
| 0 | -0.17298934 | 0 | 0.12249005  | 0 | 0           | 0 | 0.004526678 | 0 |

|   |             |   |             |   |             |   |              |
|---|-------------|---|-------------|---|-------------|---|--------------|
| 0 | -0.17445986 | 0 | 0.12277846  | 0 | 0           | 0 | 0            |
| 0 | -0.1745054  | 0 | 0           | 0 | 0.12103861  | 0 | 0            |
| 0 | -0.17337322 | 0 | 0           | 0 | 0.1224046   | 0 | 0.003670104  |
| 0 | -0.17451605 | 0 | 0           | 0 | 0.12245519  | 0 | 0            |
| 0 | 0           | 0 | 0.18582226  | 0 | 0           | 0 | 0            |
| 0 | 0           | 0 | 0           | 0 | 0.18680953  | 0 | 0            |
| 0 | 0           | 0 | 0           | 0 | 0.17148997  | 0 | 0            |
| 0 | 0           | 0 | 0.15411575  | 0 | 0           | 0 | 0            |
| 0 | 0           | 0 | 0           | 0 | 0.15511963  | 0 | 0            |
| 0 | 0           | 0 | 0.16980813  | 0 | 0           | 0 | 0            |
| 0 | 0.45216219  | 0 | 0.12860833  | 0 | 0           | 0 | 0            |
| 0 | 0.45196978  | 0 | 0           | 0 | 0.12838698  | 0 | 0            |
| 0 | 0           | 0 | 0           | 0 | 0.16632004  | 0 | 0            |
| 0 | 0           | 0 | 0.16573577  | 0 | 0           | 0 | 0            |
| 0 | 0           | 0 | 0           | 0 | 0.16262086  | 0 | 0.011598918  |
| 0 | 0           | 0 | 0.067948996 | 0 | 0.095263233 | 0 | 0            |
| 0 | 0           | 0 | 0           | 0 | 0           | 0 | 0            |
| 0 | 0           | 0 | 0.072923723 | 0 | 0.11517369  | 0 | 0            |
| 0 | 0           | 0 | 0.16163455  | 0 | 0           | 0 | 0.012799408  |
| 0 | 0           | 0 | 0           | 0 | 0.19145481  | 0 | 0            |
| 0 | 0           | 0 | 0           | 0 | 0.18332282  | 0 | 0            |
| 0 | 0           | 0 | 0           | 0 | 0.16125947  | 0 | 0            |
| 0 | 0           | 0 | 0           | 0 | 0.18884005  | 0 | 0.007055325  |
| 0 | 0.45011726  | 0 | 0.15868608  | 0 | 0           | 0 | 0            |
| 0 | 0.44999598  | 0 | 0           | 0 | 0.15930399  | 0 | 0            |
| 0 | 0           | 0 | 0.16047895  | 0 | 0           | 0 | 0            |
| 0 | 0           | 0 | 0.1903859   | 0 | 0           | 0 | 0            |
| 0 | 0           | 0 | 0.13837498  | 0 | 0           | 0 | 0            |
| 0 | 0           | 0 | 0           | 0 | 0.13885901  | 0 | 0            |
| 0 | 0           | 0 | 0.18743764  | 0 | 0           | 0 | 0.008089844  |
| 0 | 0           | 0 | 0.13742278  | 0 | 0           | 0 | 0            |
| 0 | 0           | 0 | 0           | 0 | 0.13790801  | 0 | 0            |
| 0 | 0           | 0 | 0.18212405  | 0 | 0           | 0 | 0            |
| 0 | -0.14923509 | 0 | 0           | 0 | 0           | 0 | 0            |
| 0 | 0           | 0 | 0.12875082  | 0 | 0           | 0 | -0.015183683 |
| 0 | 0           | 0 | 0           | 0 | 0.12858645  | 0 | -0.015573263 |
| 0 | 0.45150455  | 0 | 0.13470101  | 0 | 0           | 0 | 0            |
| 0 | 0           | 0 | 0           | 0 | 0           | 0 | 0            |
| 0 | 0.4514076   | 0 | 0           | 0 | 0.13445825  | 0 | 0            |
| 0 | 0           | 0 | 0.07183515  | 0 | 0.05768604  | 0 | 0            |
| 0 | 0           | 0 | 0.12817405  | 0 | 0           | 0 | 0            |
| 0 | 0           | 0 | 0           | 0 | 0.12795979  | 0 | 0            |
| 0 | 0           | 0 | 0.15199958  | 0 | 0           | 0 | -0.019391628 |
| 0 | 0           | 0 | 0           | 0 | 0.1525568   | 0 | -0.019578976 |
| 0 | -0.13598054 | 0 | 0           | 0 | 0.13935599  | 0 | 0            |
| 0 | -0.1374893  | 0 | 0.1388349   | 0 | 0           | 0 | 0            |
| 0 | -0.17209381 | 0 | 0.13878833  | 0 | 0           | 0 | 0            |

|   |             |   |             |   |             |   |              |   |
|---|-------------|---|-------------|---|-------------|---|--------------|---|
| 0 | -0.17218915 | 0 | 0           | 0 | 0.13927409  | 0 | 0            | 0 |
| 0 | 0           | 0 | 0.080943733 | 0 | 0.078789465 | 0 | 0            | 0 |
| 0 | 0           | 0 | 0.14979903  | 0 | 0           | 0 | 0            | 0 |
| 0 | 0           | 0 | 0           | 0 | 0.15049661  | 0 | 0            | 0 |
| 0 | 0           | 0 | 0.15887568  | 0 | 0           | 0 | 0            | 0 |
| 0 | 0           | 0 | 0           | 0 | 0.15988577  | 0 | 0            | 0 |
| 0 | 0           | 0 | 0.14311694  | 0 | 0           | 0 | 0            | 0 |
| 0 | 0           | 0 | 0           | 0 | 0.14359111  | 0 | 0            | 0 |
| 0 | -0.15268934 | 0 | 0           | 0 | 0           | 0 | 0            | 0 |
| 0 | -0.1761345  | 0 | 0.12895918  | 0 | 0           | 0 | -0.014697476 | 0 |
| 0 | -0.17633399 | 0 | 0           | 0 | 0.12878869  | 0 | -0.015086975 | 0 |
| 0 | -0.17141346 | 0 | 0.07423834  | 0 | 0.055489309 | 0 | 0            | 0 |
| 0 | -0.17145658 | 0 | 0.1283584   | 0 | 0           | 0 | 0            | 0 |
| 0 | 0           | 0 | 0.13452536  | 0 | 0           | 0 | -0.018080344 | 0 |
| 0 | -0.17153511 | 0 | 0           | 0 | 0.12815146  | 0 | 0            | 0 |
| 0 | -0.17906753 | 0 | 0.15231969  | 0 | 0           | 0 | -0.018697545 | 0 |
| 0 | -0.17923829 | 0 | 0           | 0 | 0.15287721  | 0 | -0.018885181 | 0 |
| 0 | 0           | 0 | 0           | 0 | 0.1343332   | 0 | -0.018383614 | 0 |
| 0 | 0           | 0 | 0.076629328 | 0 | 0.058677378 | 0 | 0            | 0 |
| 0 | -0.17345451 | 0 | 0.080905022 | 0 | 0.078927669 | 0 | 0            | 0 |
| 0 | -0.17300807 | 0 | 0.14981355  | 0 | 0           | 0 | 0            | 0 |
| 0 | -0.17311847 | 0 | 0           | 0 | 0.1505162   | 0 | 0            | 0 |
| 0 | -0.13894318 | 0 | 0.14430093  | 0 | 0           | 0 | 0            | 0 |
| 0 | -0.13741695 | 0 | 0           | 0 | 0.14482197  | 0 | 0            | 0 |
| 0 | -0.16796311 | 0 | 0.16038714  | 0 | 0           | 0 | 0            | 0 |
| 0 | -0.1670568  | 0 | 0           | 0 | 0.16141245  | 0 | 0            | 0 |
| 0 | 0.43447717  | 0 | 0.14802899  | 0 | 0           | 0 | -0.050295994 | 0 |
| 0 | 0.43401394  | 0 | 0           | 0 | 0.14788073  | 0 | -0.051588566 | 0 |
| 0 | -0.17757578 | 0 | 0.13454811  | 0 | 0           | 0 | -0.017161007 | 0 |
| 0 | -0.17776813 | 0 | 0           | 0 | 0.13435431  | 0 | -0.017464296 | 0 |
| 0 | -0.17207701 | 0 | 0.076662266 | 0 | 0.058685398 | 0 | 0            | 0 |
| 0 | 0           | 0 | 0.14129313  | 0 | 0           | 0 | 0            | 0 |
| 0 | 0           | 0 | 0           | 0 | 0.14122909  | 0 | 0            | 0 |
| 0 | 0           | 0 | 0.13970178  | 0 | 0           | 0 | 0            | 0 |
| 0 | 0           | 0 | 0           | 0 | 0.13970455  | 0 | 0            | 0 |
| 0 | 0           | 0 | 0.15603584  | 0 | 0           | 0 | -0.051714706 | 0 |
| 0 | 0           | 0 | 0           | 0 | 0.15658677  | 0 | -0.053082357 | 0 |
| 0 | 0           | 0 | 0.091460983 | 0 | 0.057162515 | 0 | -0.050727429 | 0 |
| 0 | 0           | 0 | 0.097344763 | 0 | 0.066492404 | 0 | 0            | 0 |
| 0 | 0           | 0 | 0.15732405  | 0 | 0           | 0 | 0            | 0 |
| 0 | -0.15857638 | 0 | 0.15751458  | 0 | 0           | 0 | -0.051576054 | 0 |
| 0 | 0           | 0 | 0.16486204  | 0 | 0           | 0 | 0.007462415  | 0 |
| 0 | 0           | 0 | 0           | 0 | 0           | 0 | 0            | 0 |
| 0 | -0.15762518 | 0 | 0           | 0 | 0.15810038  | 0 | -0.052954596 | 0 |
| 0 | 0           | 0 | 0           | 0 | 0.15769331  | 0 | 0            | 0 |
| 0 | 0           | 0 | 0           | 0 | 0.16505982  | 0 | 0.007203787  | 0 |
| 0 | -0.18901805 | 0 | 0.091839136 | 0 | 0.05705855  | 0 | -0.050405355 | 0 |

|   |             |   |             |   |             |              |              |
|---|-------------|---|-------------|---|-------------|--------------|--------------|
| 0 | -0.17157103 | 0 | 0           | 0 | 0           | 0            | 0            |
| 0 | 0           | 0 | 0           | 0 | 0           | 0            | 0            |
| 0 | 0           | 0 | 0           | 0 | 0           | 0            | 0            |
| 0 | -0.18198008 | 0 | 0           | 0 | 0           | 0            | 0            |
| 0 | 0.43718695  | 0 | 0           | 0 | 0           | 0            | 0            |
| 0 | 0           | 0 | 0           | 0 | 0           | 0            | 0            |
| 0 | 0.43929753  | 0 | 0           | 0 | 0           | 0            | 0            |
| 0 | 0.44125457  | 0 | 0           | 0 | 0           | 0            | 0            |
| 0 | 0           | 0 | 0           | 0 | 0           | 0            | 0            |
| 0 | 0           | 0 | 0           | 0 | 0           | 0            | 0            |
| 0 | 0.42061846  | 0 | 0           | 0 | 0           | 0            | 0            |
| 0 | 0           | 0 | 0           | 0 | 0           | -0.017043326 | 0            |
| 0 | -0.18504425 | 0 | 0           | 0 | 0           | 0            | 0            |
| 0 | 0.4357538   | 0 | 0           | 0 | 0           | -0.004937183 | 0            |
| 0 | 0.43686008  | 0 | 0           | 0 | 0           | 0            | 0            |
| 0 | 0           | 0 | 0           | 0 | 0           | 0            | 0            |
| 0 | 0           | 0 | 0           | 0 | 0           | 0            | 0            |
| 0 | 0           | 0 | 0.066902601 | 0 | 0.10049134  | 0            | 0            |
| 0 | 0           | 0 | 0           | 0 | 0.16181103  | 0            | 0            |
| 0 | 0           | 0 | 0           | 0 | 0.16591598  | 0            | 0            |
| 0 | 0           | 0 | 0           | 0 | 0           | 0            | 0            |
| 0 | 0.46925417  | 0 | 0.1785957   | 0 | 0           | 0            | 0            |
| 0 | 0           | 0 | 0           | 0 | 0.16657658  | 0            | -0.003396652 |
| 0 | 0           | 0 | 0           | 0 | 0           | 0.00734338   | 0            |
| 0 | -0.18395354 | 0 | 0           | 0 | 0           | 0            | 0            |
| 0 | 0           | 0 | 0.16058511  | 0 | 0           | 0            | 0            |
| 0 | 0           | 0 | 0.16504632  | 0 | 0           | 0            | 0            |
| 0 | 0.44865706  | 0 | 0.1297999   | 0 | 0.042781437 | 0            | 0            |
| 0 | 0           | 0 | 0.16564854  | 0 | 0           | 0            | -0.002677236 |
| 0 | 0           | 0 | 0           | 0 | 0           | 0            | 0            |
| 0 | 0           | 0 | 0           | 0 | 0           | 0            | -0.003244255 |
| 0 | -0.19089006 | 0 | 0           | 0 | 0           | 0            | -0.016349759 |
| 0 | -0.21414677 | 0 | 0           | 0 | 0           | 0            | 0            |
| 0 | 0.46999017  | 0 | 0           | 0 | 0.17899265  | 0            | 0            |
| 0 | 0           | 0 | 0.1785279   | 0 | 0           | 0            | 0.024130296  |
| 0 | 0           | 0 | 0           | 0 | 0.17877911  | 0            | 0.023811179  |
| 0 | 0           | 0 | 0.084224438 | 0 | 0.089026459 | 0            | 0.033402392  |
| 0 | 0           | 0 | 0           | 0 | 0.16616301  | 0            | 0.037480848  |
| 0 | 0           | 0 | 0.16534226  | 0 | 0           | 0            | 0.038411582  |
| 0 | -0.18106385 | 0 | 0           | 0 | 0           | 0            | 0            |
| 0 | 0           | 0 | 0.17387184  | 0 | 0           | 0            | 0            |
| 0 | 0           | 0 | 0           | 0 | 0.17524007  | 0            | 0            |
| 0 | 0           | 0 | 0           | 0 | 0.17428038  | 0            | 0            |
| 0 | 0           | 0 | 0           | 0 | 0           | 0            | -0.004352135 |
| 0 | 0           | 0 | 0           | 0 | 0           | 0            | 0            |
| 0 | 0           | 0 | 0.1749916   | 0 | 0           | 0            | 0            |
| 0 | 0           | 0 | 0           | 0 | 0.16953643  | 0            | 0.035555354  |

|   |             |   |             |   |             |   |              |   |
|---|-------------|---|-------------|---|-------------|---|--------------|---|
| 0 | 0           | 0 | 0           | 0 | 0.15926825  | 0 | 0            | 0 |
| 0 | 0           | 0 | 0.16902679  | 0 | 0           | 0 | 0.036210648  | 0 |
| 0 | -0.18635155 | 0 | 0           | 0 | 0           | 0 | 0            | 0 |
| 0 | 0           | 0 | 0.15800468  | 0 | 0           | 0 | 0            | 0 |
| 0 | 0           | 0 | 0.089065945 | 0 | 0.092100983 | 0 | 0            | 0 |
| 0 | 0           | 0 | 0           | 0 | 0           | 0 | -0.008634964 | 0 |
| 0 | -0.1951662  | 0 | 0           | 0 | 0           | 0 | 0            | 0 |
| 0 | -0.18196041 | 0 | 0           | 0 | 0           | 0 | 0.007895877  | 0 |
| 0 | 0           | 0 | 0.071697609 | 0 | 0.10184445  | 0 | 0            | 0 |
| 0 | -0.18256735 | 0 | 0           | 0 | 0           | 0 | 0            | 0 |
| 0 | -0.18310017 | 0 | 0           | 0 | 0           | 0 | -0.002644272 | 0 |
| 0 | 0           | 0 | 0           | 0 | 0           | 0 | 0            | 0 |
| 0 | 0           | 0 | 0.12907575  | 0 | 0.050008169 | 0 | 0            | 0 |
| 0 | 0           | 0 | 0           | 0 | 0.17268516  | 0 | -0.003286749 | 0 |
| 0 | 0           | 0 | 0           | 0 | 0           | 0 | -0.060254465 | 0 |
| 0 | 0           | 0 | 0.17178052  | 0 | 0           | 0 | -0.00265289  | 0 |
| 0 | 0           | 0 | 0           | 0 | 0           | 0 | 0            | 0 |
| 0 | -0.20157142 | 0 | 0           | 0 | 0           | 0 | -0.003909015 | 0 |
| 0 | -0.20139894 | 0 | 0           | 0 | 0           | 0 | 0            | 0 |
| 0 | -0.18916972 | 0 | 0           | 0 | 0           | 0 | -0.007746087 | 0 |
| 0 | -0.15097265 | 0 | 0.12910734  | 0 | 0.051424992 | 0 | 0            | 0 |
| 0 | 0           | 0 | 0.079802822 | 0 | 0.091402168 | 0 | 0            | 0 |
| 0 | 0           | 0 | 0           | 0 | 0.16824335  | 0 | 0            | 0 |
| 0 | -0.17810706 | 0 | 0           | 0 | 0           | 0 | -0.059679556 | 0 |
| 0 | 0           | 0 | 0.16763351  | 0 | 0           | 0 | 0            | 0 |
| 0 | 0           | 0 | 0.072491324 | 0 | 0.091087753 | 0 | 0            | 0 |
| 0 | -0.23547443 | 0 | 0           | 0 | 0           | 0 | 0            | 0 |
| 0 | 0.37502733  | 0 | 0           | 0 | 0           | 0 | 0            | 0 |
| 0 | 0.45025302  | 0 | 0           | 0 | 0           | 0 | 0            | 0 |
| 0 | -0.2246156  | 0 | 0           | 0 | 0           | 0 | 0            | 0 |
| 0 | 0           | 0 | 0           | 0 | 0           | 0 | 0            | 0 |
| 0 | 0           | 0 | 0           | 0 | 0           | 0 | -0.017425381 | 0 |
| 0 | 0           | 0 | 0           | 0 | 0           | 0 | 0            | 0 |
| 0 | 0           | 0 | 0           | 0 | 0           | 0 | 0            | 0 |
| 0 | 0           | 0 | 0           | 0 | 0           | 0 | -0.00256414  | 0 |
| 0 | 0           | 0 | 0           | 0 | 0.19542188  | 0 | -0.024893858 | 0 |
| 0 | 0           | 0 | 0.19411777  | 0 | 0           | 0 | -0.024467266 | 0 |
| 0 | -0.23571825 | 0 | 0           | 0 | 0           | 0 | 0            | 0 |
| 0 | -0.24550356 | 0 | 0           | 0 | 0           | 0 | -0.017450624 | 0 |
| 0 | 0           | 0 | 0.090616724 | 0 | 0.11095035  | 0 | 0            | 0 |
| 0 | -0.17272404 | 0 | 0           | 0 | 0           | 0 | 0            | 0 |
| 0 | -0.17393237 | 0 | 0           | 0 | 0           | 0 | -0.001983339 | 0 |
| 0 | 0.44947381  | 0 | 0           | 0 | 0           | 0 | 0            | 0 |
| 0 | 0           | 0 | 0.095240304 | 0 | 0.10035653  | 0 | -0.048741921 | 0 |
| 0 | 0.46091451  | 0 | 0           | 0 | 0           | 0 | 0            | 0 |
| 0 | 0           | 0 | 0           | 0 | 0           | 0 | 0            | 0 |
| 0 | 0.43970658  | 0 | 0           | 0 | 0           | 0 | -0.033535509 | 0 |







|   |             |   |             |   |             |              |   |
|---|-------------|---|-------------|---|-------------|--------------|---|
| 0 | 0.47700407  | 0 | 0.15293358  | 0 | 0           | 0            | 0 |
| 0 | 0.47669112  | 0 | 0           | 0 | 0.15329273  | 0            | 0 |
| 0 | 0           | 0 | 0.13374061  | 0 | 0           | 0            | 0 |
| 0 | 0           | 0 | 0           | 0 | 0.13384887  | 0            | 0 |
| 0 | 0           | 0 | 0.13877551  | 0 | 0           | 0            | 0 |
| 0 | 0           | 0 | 0           | 0 | 0.13912323  | 0            | 0 |
| 0 | 0           | 0 | 0.13492726  | 0 | 0           | 0            | 0 |
| 0 | 0           | 0 | 0           | 0 | 0.13515901  | 0            | 0 |
| 0 | 0           | 0 | 0.14622545  | 0 | 0           | -0.019408436 | 0 |
| 0 | 0           | 0 | 0           | 0 | 0.14649921  | -0.019660076 | 0 |
| 0 | -0.14533999 | 0 | 0.13408919  | 0 | 0           | 0            | 0 |
| 0 | -0.14553949 | 0 | 0           | 0 | 0.13419434  | 0            | 0 |
| 0 | -0.15092041 | 0 | 0.13904996  | 0 | 0           | 0            | 0 |
| 0 | 0           | 0 | 0.087397918 | 0 | 0.066397834 | 0            | 0 |
| 0 | -0.15110984 | 0 | 0           | 0 | 0.13940157  | 0            | 0 |
| 0 | 0           | 0 | 0.15183846  | 0 | 0           | 0            | 0 |
| 0 | -0.14487778 | 0 | 0.13489078  | 0 | 0           | 0            | 0 |
| 0 | 0           | 0 | 0           | 0 | 0.15249268  | 0            | 0 |
| 0 | -0.14509961 | 0 | 0           | 0 | 0.13511191  | 0            | 0 |
| 0 | -0.15212159 | 0 | 0.14652125  | 0 | 0           | -0.018753094 | 0 |
| 0 | -0.15235905 | 0 | 0           | 0 | 0.14683614  | -0.018695618 | 0 |
| 0 | -0.14654057 | 0 | 0.087477491 | 0 | 0.066405332 | 0            | 0 |
| 0 | -0.1447949  | 0 | 0.15326524  | 0 | 0           | 0            | 0 |
| 0 | -0.14421516 | 0 | 0           | 0 | 0.15394138  | 0            | 0 |
| 0 | 0           | 0 | 0.15285856  | 0 | 0           | 0            | 0 |
| 0 | 0           | 0 | 0           | 0 | 0.15310542  | 0            | 0 |
| 0 | 0.46891692  | 0 | 0           | 0 | 0.16422933  | 0            | 0 |
| 0 | 0.46890762  | 0 | 0.16393712  | 0 | 0           | 0            | 0 |
| 0 | 0.46290038  | 0 | 0           | 0 | 0.14208049  | 0            | 0 |
| 0 | 0.46272295  | 0 | 0.14108494  | 0 | 0           | 0            | 0 |
| 0 | -0.16053787 | 0 | 0.15313647  | 0 | 0           | 0            | 0 |
| 0 | 0.46664546  | 0 | 0.069130796 | 0 | 0.083472943 | 0            | 0 |
| 0 | -0.16041909 | 0 | 0           | 0 | 0.15339168  | 0            | 0 |
| 0 | 0.4668346   | 0 | 0           | 0 | 0.15463435  | 0            | 0 |
| 0 | 0.46776968  | 0 | 0           | 0 | 0.15294353  | 0.003053289  | 0 |
| 0 | 0.46268783  | 0 | 0           | 0 | 0.15047296  | 0            | 0 |
| 0 | 0.46675835  | 0 | 0.15423383  | 0 | 0           | 0            | 0 |
| 0 | 0.46783586  | 0 | 0.15227524  | 0 | 0           | 0.003691552  | 0 |
| 0 | 0.46137171  | 0 | 0.14915644  | 0 | 0           | 0            | 0 |
| 0 | 0           | 0 | 0           | 0 | 0.15930662  | 0            | 0 |
| 0 | 0           | 0 | 0.15903869  | 0 | 0           | 0            | 0 |
| 0 | 0           | 0 | 0.08050911  | 0 | 0.084651138 | 0            | 0 |
| 0 | 0           | 0 | 0.15915868  | 0 | 0           | 0            | 0 |
| 0 | 0           | 0 | 0           | 0 | 0.16385802  | -0.013816267 | 0 |
| 0 | 0           | 0 | 0           | 0 | 0.15973511  | 0            | 0 |
| 0 | 0           | 0 | 0.16352985  | 0 | 0           | -0.013483313 | 0 |
| 0 | 0           | 0 | 0           | 0 | 0.14712465  | 0            | 0 |

|   |             |   |             |   |             |   |              |
|---|-------------|---|-------------|---|-------------|---|--------------|
| 0 | 0           | 0 | 0.14665842  | 0 | 0           | 0 | 0            |
| 0 | 0           | 0 | 0.065143116 | 0 | 0.077333878 | 0 | 0            |
| 0 | 0           | 0 | 0           | 0 | 0.14295484  | 0 | 0.009826513  |
| 0 | 0           | 0 | 0.14215524  | 0 | 0           | 0 | 0.010650084  |
| 0 | 0           | 0 | 0           | 0 | 0.14280517  | 0 | 0            |
| 0 | 0           | 0 | 0.14153451  | 0 | 0           | 0 | 0            |
| 0 | -0.15459316 | 0 | 0           | 0 | 0.15964853  | 0 | 0            |
| 0 | -0.15461333 | 0 | 0.15937332  | 0 | 0           | 0 | 0            |
| 0 | 0           | 0 | 0.072151281 | 0 | 0.083818674 | 0 | 0            |
| 0 | 0           | 0 | 0.070113453 | 0 | 0.083286977 | 0 | 0.003460873  |
| 0 | 0           | 0 | 0.068646614 | 0 | 0.081673881 | 0 | 0            |
| 0 | -0.15442677 | 0 | 0.080543234 | 0 | 0.084793792 | 0 | 0            |
| 0 | -0.15879291 | 0 | 0           | 0 | 0.16402735  | 0 | -0.01292425  |
| 0 | -0.15869258 | 0 | 0.16369939  | 0 | 0           | 0 | -0.012585853 |
| 0 | 0           | 0 | 0           | 0 | 0.15268705  | 0 | 0            |
| 0 | -0.16857171 | 0 | 0.16028384  | 0 | 0           | 0 | 0            |
| 0 | -0.16687955 | 0 | 0           | 0 | 0.16089594  | 0 | 0            |
| 0 | 0           | 0 | 0.15194953  | 0 | 0           | 0 | 0            |
| 0 | 0           | 0 | 0           | 0 | 0.15044725  | 0 | 0.003784764  |
| 0 | 0           | 0 | 0           | 0 | 0.15470603  | 0 | 0.000400398  |
| 0 | 0           | 0 | 0.14936182  | 0 | 0           | 0 | 0.004638113  |
| 0 | 0           | 0 | 0.15431916  | 0 | 0           | 0 | 0.00076151   |
| 0 | -0.16059131 | 0 | 0           | 0 | 0.1475676   | 0 | 0            |
| 0 | -0.160757   | 0 | 0.14708838  | 0 | 0           | 0 | 0            |
| 0 | -0.15719839 | 0 | 0           | 0 | 0.14335209  | 0 | 0.010482937  |
| 0 | -0.16045153 | 0 | 0.065144395 | 0 | 0.077621551 | 0 | 0            |
| 0 | -0.15716683 | 0 | 0.14252814  | 0 | 0           | 0 | 0.011291868  |
| 0 | -0.15153289 | 0 | 0           | 0 | 0.14396406  | 0 | 0            |
| 0 | 0           | 0 | 0.14037072  | 0 | 0           | 0 | 0            |
| 0 | 0           | 0 | 0           | 0 | 0.14106532  | 0 | 0            |
| 0 | -0.15282651 | 0 | 0.14266103  | 0 | 0           | 0 | 0            |
| 0 | -0.15638075 | 0 | 0.07260058  | 0 | 0.083751885 | 0 | 0            |
| 0 | -0.15534271 | 0 | 0.070296147 | 0 | 0.083409626 | 0 | 0.004153189  |
| 0 | -0.15838073 | 0 | 0.068670616 | 0 | 0.083088124 | 0 | 0            |
| 0 | -0.16072241 | 0 | 0           | 0 | 0.15401825  | 0 | 0            |
| 0 | -0.15618979 | 0 | 0           | 0 | 0.15510325  | 0 | 0.000977345  |
| 0 | -0.15824615 | 0 | 0           | 0 | 0.15192084  | 0 | 0.003960157  |
| 0 | -0.16240396 | 0 | 0.15324565  | 0 | 0           | 0 | 0            |
| 0 | -0.15609298 | 0 | 0.1547273   | 0 | 0           | 0 | 0.001356233  |
| 0 | -0.15949861 | 0 | 0.15081341  | 0 | 0           | 0 | 0.004834443  |
| 0 | 0.48520829  | 0 | 0.13326369  | 0 | 0           | 0 | 0            |
| 0 | 0.48640801  | 0 | 0           | 0 | 0.13402235  | 0 | 0            |
| 0 | 0           | 0 | 0           | 0 | 0.15279335  | 0 | 0            |
| 0 | 0.4480544   | 0 | 0.12781106  | 0 | 0           | 0 | 0            |
| 0 | 0           | 0 | 0.15204428  | 0 | 0           | 0 | 0            |
| 0 | 0.44776205  | 0 | 0           | 0 | 0.12727383  | 0 | 0            |
| 0 | 0           | 0 | 0.13745784  | 0 | 0           | 0 | 0            |

|   |             |   |             |   |             |              |              |
|---|-------------|---|-------------|---|-------------|--------------|--------------|
| 0 | 0           | 0 | 0.12292391  | 0 | 0           | 0            | 0            |
| 0 | 0.44929311  | 0 | 0.071381868 | 0 | 0.05204123  | 0            | 0            |
| 0 | 0           | 0 | 0           | 0 | 0.13762782  | 0            | 0            |
| 0 | 0.44917417  | 0 | 0.1209932   | 0 | 0           | 0            | 0            |
| 0 | 0.45054146  | 0 | 0.12279191  | 0 | 0           | 0.00411477   | 0            |
| 0 | 0.44929183  | 0 | 0.12279966  | 0 | 0           | 0            | 0            |
| 0 | 0           | 0 | 0           | 0 | 0.12238817  | 0            | 0            |
| 0 | 0.44906398  | 0 | 0           | 0 | 0.12130232  | 0            | 0            |
| 0 | 0.45015717  | 0 | 0           | 0 | 0.12270661  | 0            | 0.003253116  |
| 0 | 0.44914306  | 0 | 0           | 0 | 0.12247488  | 0            | 0            |
| 0 | 0           | 0 | 0.13952672  | 0 | 0           | 0            | 0            |
| 0 | 0           | 0 | 0.13081248  | 0 | 0           | 0            | 0            |
| 0 | 0           | 0 | 0           | 0 | 0.1397604   | 0            | 0            |
| 0 | 0           | 0 | 0           | 0 | 0.13149403  | 0            | 0            |
| 0 | 0           | 0 | 0.16561658  | 0 | 0           | 0            | 0            |
| 0 | 0           | 0 | 0.068622089 | 0 | 0.065478129 | 0            | 0            |
| 0 | 0           | 0 | 0           | 0 | 0.16651143  | 0            | 0            |
| 0 | -0.13809499 | 0 | 0.1386551   | 0 | 0           | 0            | 0            |
| 0 | 0           | 0 | 0.12759677  | 0 | 0           | -0.010988604 | 0            |
| 0 | 0           | 0 | 0.13273735  | 0 | 0           | 0.003307744  | 0            |
| 0 | 0           | 0 | 0.082309489 | 0 | 0.045913399 | 0            | 0            |
| 0 | 0           | 0 | 0.13287361  | 0 | 0           | 0            | 0            |
| 0 | 0           | 0 | 0           | 0 | 0.13338909  | 0            | 0.002379953  |
| 0 | 0           | 0 | 0           | 0 | 0.13327084  | 0            | 0            |
| 0 | -0.13672958 | 0 | 0           | 0 | 0.13886473  | 0            | 0            |
| 0 | 0           | 0 | 0           | 0 | 0.12709326  | 0            | -0.011310505 |
| 0 | -0.17501817 | 0 | 0.1231092   | 0 | 0           | 0            | 0            |
| 0 | -0.12773701 | 0 | 0.13194219  | 0 | 0           | 0            | 0            |
| 0 | -0.12719673 | 0 | 0           | 0 | 0.13264783  | 0            | 0            |
| 0 | -0.17508885 | 0 | 0           | 0 | 0.1225699   | 0            | 0            |
| 0 | -0.17617932 | 0 | 0.13954849  | 0 | 0           | 0            | 0            |
| 0 | -0.1347305  | 0 | 0.06882096  | 0 | 0.066550424 | 0            | 0            |
| 0 | -0.17628602 | 0 | 0           | 0 | 0.13978353  | 0            | 0            |
| 0 | -0.13507643 | 0 | 0.13401341  | 0 | 0           | 0.003793174  | 0            |
| 0 | -0.13619533 | 0 | 0.13415615  | 0 | 0           | 0            | 0            |
| 0 | -0.13399481 | 0 | 0           | 0 | 0.13469338  | 0            | 0.002850149  |
| 0 | -0.1347319  | 0 | 0           | 0 | 0.13457925  | 0            | 0            |
| 0 | 0           | 0 | 0.072739409 | 0 | 0.049012798 | 0            | 0            |
| 0 | 0           | 0 | 0.072218354 | 0 | 0.051120927 | 0            | 0.003663955  |
| 0 | 0           | 0 | 0.070571519 | 0 | 0.052978662 | 0            | 0            |
| 0 | 0           | 0 | 0.12101184  | 0 | 0           | 0.00216353   | 0            |
| 0 | 0           | 0 | 0.11992963  | 0 | 0           | 0            | 0            |
| 0 | -0.17875396 | 0 | 0.12763813  | 0 | 0           | -0.010068223 | 0            |
| 0 | 0           | 0 | 0.122505    | 0 | 0           | 0.003680401  | 0            |
| 0 | -0.17552347 | 0 | 0.082282468 | 0 | 0.045984822 | 0            | 0            |
| 0 | 0           | 0 | 0           | 0 | 0.12000871  | 0            | 0            |
| 0 | 0           | 0 | 0           | 0 | 0.12125201  | 0            | 0.001794505  |



|   |             |   |             |   |             |              |   |
|---|-------------|---|-------------|---|-------------|--------------|---|
| 0 | 0.44440915  | 0 | 0.15243546  | 0 | 0           | -0.019234918 | 0 |
| 0 | 0.44423895  | 0 | 0           | 0 | 0.15298804  | -0.019424722 | 0 |
| 0 | -0.1599391  | 0 | 0           | 0 | 0           | 0            | 0 |
| 0 | 0           | 0 | 0           | 0 | 0.16600656  | 0.003646863  | 0 |
| 0 | 0           | 0 | 0.18529176  | 0 | 0           | 0            | 0 |
| 0 | 0           | 0 | 0.16537891  | 0 | 0           | 0.004295994  | 0 |
| 0 | 0           | 0 | 0.071738982 | 0 | 0.091835695 | 0.012176295  | 0 |
| 0 | 0           | 0 | 0           | 0 | 0.15961408  | 0.016024651  | 0 |
| 0 | 0           | 0 | 0           | 0 | 0           | -0.009815449 | 0 |
| 0 | 0           | 0 | 0.077815949 | 0 | 0.11490285  | 0            | 0 |
| 0 | 0           | 0 | 0           | 0 | 0           | 0            | 0 |
| 0 | 0           | 0 | 0           | 0 | 0.18270951  | 0.013347599  | 0 |
| 0 | 0.45019947  | 0 | 0.081337442 | 0 | 0.078798462 | 0            | 0 |
| 0 | 0           | 0 | 0.07569948  | 0 | 0.11401199  | 0.007696879  | 0 |
| 0 | 0           | 0 | 0.069274322 | 0 | 0.11521835  | 0            | 0 |
| 0 | 0           | 0 | 0.15884531  | 0 | 0           | 0.01678461   | 0 |
| 0 | 0           | 0 | 0.066558812 | 0 | 0.095822456 | 0            | 0 |
| 0 | 0.45050206  | 0 | 0.15018204  | 0 | 0           | 0            | 0 |
| 0 | 0.45043944  | 0 | 0           | 0 | 0.15087204  | 0            | 0 |
| 0 | 0           | 0 | 0           | 0 | 0.13841643  | -0.016202111 | 0 |
| 0 | 0           | 0 | 0.13784762  | 0 | 0           | -0.015751513 | 0 |
| 0 | 0           | 0 | 0           | 0 | 0.14264535  | 0            | 0 |
| 0 | 0           | 0 | 0           | 0 | 0.19103662  | 0.004025166  | 0 |
| 0 | 0           | 0 | 0.14181997  | 0 | 0           | 0            | 0 |
| 0 | 0.45319901  | 0 | 0.15978507  | 0 | 0           | 0            | 0 |
| 0 | 0.48224126  | 0 | 0.14393038  | 0 | 0           | 0            | 0 |
| 0 | 0.45409929  | 0 | 0           | 0 | 0.16079106  | 0            | 0 |
| 0 | 0.48375883  | 0 | 0           | 0 | 0.14442226  | 0            | 0 |
| 0 | 0           | 0 | 0.1815452   | 0 | 0           | 0.014054974  | 0 |
| 0 | 0           | 0 | 0.070388894 | 0 | 0.069645417 | 0            | 0 |
| 0 | 0           | 0 | 0.069631556 | 0 | 0.069416367 | 0            | 0 |
| 0 | 0           | 0 | 0           | 0 | 0.14358091  | 0            | 0 |
| 0 | 0           | 0 | 0.14289158  | 0 | 0           | 0            | 0 |
| 0 | -0.15423533 | 0 | 0           | 0 | 0           | 0            | 0 |
| 0 | 0           | 0 | 0.13752729  | 0 | 0           | -0.010054204 | 0 |
| 0 | 0           | 0 | 0           | 0 | 0.13798094  | -0.010231191 | 0 |
| 0 | 0           | 0 | 0           | 0 | 0.13768055  | 0            | 0 |
| 0 | 0           | 0 | 0.13717001  | 0 | 0           | 0            | 0 |
| 0 | 0           | 0 | 0.19010074  | 0 | 0           | 0.004534858  | 0 |
| 0 | 0           | 0 | 0           | 0 | 0           | -0.019753263 | 0 |
| 0 | 0.44582366  | 0 | 0.1349586   | 0 | 0           | -0.017884509 | 0 |
| 0 | -0.13002441 | 0 | 0           | 0 | 0           | 0            | 0 |
| 0 | 0.4456326   | 0 | 0           | 0 | 0.13476101  | -0.018187736 | 0 |
| 0 | -0.15218126 | 0 | 0           | 0 | 0           | -0.008951504 | 0 |
| 0 | 0           | 0 | 0.070466292 | 0 | 0.059333123 | -0.015372199 | 0 |
| 0 | 0           | 0 | 0           | 0 | 0           | 0            | 0 |
| 0 | 0.45156546  | 0 | 0.077005028 | 0 | 0.058741427 | 0            | 0 |

|   |             |   |             |   |             |   |              |   |
|---|-------------|---|-------------|---|-------------|---|--------------|---|
| 0 | 0           | 0 | 0.12866439  | 0 | 0           | 0 | -0.014513801 | 0 |
| 0 | 0           | 0 | 0           | 0 | 0.12848797  | 0 | -0.014766934 | 0 |
| 0 | -0.14049801 | 0 | 0           | 0 | 0.13984226  | 0 | -0.015771067 | 0 |
| 0 | -0.14191621 | 0 | 0.13923901  | 0 | 0           | 0 | -0.015313976 | 0 |
| 0 | 0           | 0 | 0.066414373 | 0 | 0.062775889 | 0 | 0            | 0 |
| 0 | 0           | 0 | 0.077040031 | 0 | 0.076440116 | 0 | -0.019156797 | 0 |
| 0 | -0.14512946 | 0 | 0           | 0 | 0.14379561  | 0 | 0            | 0 |
| 0 | -0.14626718 | 0 | 0.1429497   | 0 | 0           | 0 | 0            | 0 |
| 0 | -0.1361085  | 0 | 0.069534575 | 0 | 0.070957522 | 0 | 0            | 0 |
| 0 | 0           | 0 | 0           | 0 | 0.15567808  | 0 | -0.021567386 | 0 |
| 0 | 0           | 0 | 0.15471881  | 0 | 0           | 0 | -0.021163811 | 0 |
| 0 | -0.13572181 | 0 | 0           | 0 | 0.13908764  | 0 | 0            | 0 |
| 0 | -0.13725825 | 0 | 0.13853837  | 0 | 0           | 0 | 0            | 0 |
| 0 | 0           | 0 | 0.15004859  | 0 | 0           | 0 | -0.018009219 | 0 |
| 0 | 0           | 0 | 0           | 0 | 0.15068676  | 0 | -0.018358253 | 0 |
| 0 | -0.17204883 | 0 | 0.070666777 | 0 | 0.069785036 | 0 | 0            | 0 |
| 0 | -0.17239934 | 0 | 0           | 0 | 0.14376144  | 0 | 0            | 0 |
| 0 | -0.17229535 | 0 | 0.14307284  | 0 | 0           | 0 | 0            | 0 |
| 0 | -0.17506011 | 0 | 0.13795617  | 0 | 0           | 0 | -0.009471209 | 0 |
| 0 | -0.17520386 | 0 | 0           | 0 | 0.13843726  | 0 | -0.009625965 | 0 |
| 0 | 0           | 0 | 0.077327765 | 0 | 0.074443656 | 0 | 0            | 0 |
| 0 | -0.15853642 | 0 | 0           | 0 | 0           | 0 | -0.019139533 | 0 |
| 0 | 0           | 0 | 0.14348603  | 0 | 0           | 0 | -0.018495395 | 0 |
| 0 | 0           | 0 | 0           | 0 | 0.14403017  | 0 | -0.018844895 | 0 |
| 0 | 0           | 0 | 0.15042528  | 0 | 0           | 0 | 0            | 0 |
| 0 | 0           | 0 | 0           | 0 | 0.15125354  | 0 | 0            | 0 |
| 0 | 0           | 0 | 0.081120627 | 0 | 0.079659326 | 0 | 0            | 0 |
| 0 | 0           | 0 | 0.074435755 | 0 | 0.070307028 | 0 | 0            | 0 |
| 0 | -0.17613315 | 0 | 0.070666357 | 0 | 0.059361185 | 0 | -0.014888189 | 0 |
| 0 | -0.16422798 | 0 | 0           | 0 | 0           | 0 | 0            | 0 |
| 0 | -0.17579832 | 0 | 0.12881807  | 0 | 0           | 0 | -0.013617791 | 0 |
| 0 | -0.17595422 | 0 | 0           | 0 | 0.12863846  | 0 | -0.013870824 | 0 |
| 0 | -0.1789207  | 0 | 0.077198388 | 0 | 0.076604774 | 0 | -0.018462277 | 0 |
| 0 | -0.17138423 | 0 | 0.067945871 | 0 | 0.061427223 | 0 | 0            | 0 |
| 0 | 0           | 0 | 0.075562499 | 0 | 0.0600311   | 0 | -0.018231123 | 0 |
| 0 | -0.16570837 | 0 | 0           | 0 | 0.1571913   | 0 | -0.021647968 | 0 |
| 0 | -0.16665968 | 0 | 0.1562061   | 0 | 0           | 0 | -0.021243383 | 0 |
| 0 | 0.46237001  | 0 | 0.1568994   | 0 | 0           | 0 | -0.051622882 | 0 |
| 0 | -0.17841493 | 0 | 0.15003984  | 0 | 0           | 0 | -0.017089715 | 0 |
| 0 | -0.17863046 | 0 | 0           | 0 | 0.1508009   | 0 | -0.017420861 | 0 |
| 0 | -0.14413844 | 0 | 0.14467254  | 0 | 0           | 0 | -0.017684701 | 0 |
| 0 | -0.14269118 | 0 | 0           | 0 | 0.14525119  | 0 | -0.018040118 | 0 |
| 0 | 0.46351059  | 0 | 0           | 0 | 0.15746433  | 0 | -0.052974438 | 0 |
| 0 | -0.15120135 | 0 | 0           | 0 | 0.1515564   | 0 | 0            | 0 |
| 0 | -0.15234025 | 0 | 0.15071884  | 0 | 0           | 0 | 0            | 0 |
| 0 | -0.17297568 | 0 | 0.077250496 | 0 | 0.074590325 | 0 | 0            | 0 |
| 0 | -0.13754324 | 0 | 0.07417246  | 0 | 0.071798268 | 0 | 0            | 0 |

|   |             |   |             |   |             |   |              |   |
|---|-------------|---|-------------|---|-------------|---|--------------|---|
| 0 | -0.16665923 | 0 | 0.081292653 | 0 | 0.081017181 | 0 | 0            | 0 |
| 0 | 0.43456442  | 0 | 0.091995191 | 0 | 0.057086948 | 0 | -0.050543906 | 0 |
| 0 | 0           | 0 | 0.14280954  | 0 | 0           | 0 | 0.020161425  | 0 |
| 0 | 0           | 0 | 0.13902073  | 0 | 0           | 0 | 0.023359708  | 0 |
| 0 | 0           | 0 | 0           | 0 | 0.14272864  | 0 | 0.020042878  | 0 |
| 0 | -0.1775816  | 0 | 0.075703521 | 0 | 0.059912005 | 0 | -0.017330022 | 0 |
| 0 | 0           | 0 | 0           | 0 | 0.13897034  | 0 | 0.023128202  | 0 |
| 0 | 0           | 0 | 0.13594408  | 0 | 0           | 0 | 0            | 0 |
| 0 | 0           | 0 | 0.085823699 | 0 | 0.056871255 | 0 | 0            | 0 |
| 0 | 0.45188204  | 0 | 0           | 0 | 0           | 0 | 0            | 0 |
| 0 | 0           | 0 | 0           | 0 | 0.13589024  | 0 | 0            | 0 |
| 0 | 0           | 0 | 0.14212835  | 0 | 0           | 0 | 0            | 0 |
| 0 | 0           | 0 | 0.14003223  | 0 | 0           | 0 | 0            | 0 |
| 0 | 0           | 0 | 0.087804639 | 0 | 0.053436442 | 0 | 0            | 0 |
| 0 | 0           | 0 | 0           | 0 | 0.14221704  | 0 | 0            | 0 |
| 0 | 0           | 0 | 0           | 0 | 0           | 0 | -0.029769012 | 0 |
| 0 | 0           | 0 | 0.090024049 | 0 | 0.067645618 | 0 | -0.052056412 | 0 |
| 0 | 0           | 0 | 0           | 0 | 0.14010145  | 0 | 0            | 0 |
| 0 | 0           | 0 | 0           | 0 | 0           | 0 | 0            | 0 |
| 0 | 0           | 0 | 0           | 0 | 0           | 0 | 0            | 0 |
| 0 | 0.4416738   | 0 | 0           | 0 | 0           | 0 | 0            | 0 |
| 0 | 0           | 0 | 0.15886909  | 0 | 0           | 0 | 0.012275538  | 0 |
| 0 | -0.15736099 | 0 | 0.090141222 | 0 | 0.069038997 | 0 | -0.051925296 | 0 |
| 0 | 0           | 0 | 0.095971965 | 0 | 0.062879208 | 0 | 0            | 0 |
| 0 | -0.17798322 | 0 | 0           | 0 | 0           | 0 | -0.029209264 | 0 |
| 0 | 0           | 0 | 0.082249444 | 0 | 0.083929516 | 0 | 0.00761868   | 0 |
| 0 | 0           | 0 | 0           | 0 | 0.15917206  | 0 | 0.011867479  | 0 |
| 0 | -0.1941763  | 0 | 0           | 0 | 0           | 0 | 0            | 0 |
| 0 | 0           | 0 | 0           | 0 | 0           | 0 | 0            | 0 |
| 0 | 0           | 0 | 0           | 0 | 0           | 0 | 0            | 0 |
| 0 | 0           | 0 | 0           | 0 | 0           | 0 | 0            | 0 |
| 0 | 0           | 0 | 0           | 0 | 0           | 0 | -0.001689635 | 0 |
| 0 | 0.43838445  | 0 | 0           | 0 | 0           | 0 | 0            | 0 |
| 0 | 0           | 0 | 0           | 0 | 0           | 0 | 0.001551717  | 0 |
| 0 | -0.15237638 | 0 | 0           | 0 | 0           | 0 | 0            | 0 |
| 0 | 0.4395395   | 0 | 0           | 0 | 0           | 0 | 0            | 0 |
| 0 | -0.18242457 | 0 | 0           | 0 | 0           | 0 | 0            | 0 |
| 0 | -0.18229378 | 0 | 0           | 0 | 0           | 0 | -0.001035566 | 0 |
| 0 | 0           | 0 | 0           | 0 | 0           | 0 | 0            | 0 |
| 0 | 0.4070893   | 0 | 0           | 0 | 0           | 0 | 0            | 0 |
| 0 | 0.43246145  | 0 | 0           | 0 | 0           | 0 | -0.016971277 | 0 |
| 0 | 0.44245595  | 0 | 0           | 0 | 0           | 0 | 0            | 0 |
| 0 | 0           | 0 | 0           | 0 | 0           | 0 | 0            | 0 |
| 0 | 0.43459545  | 0 | 0           | 0 | 0           | 0 | 0            | 0 |
| 0 | 0.42614658  | 0 | 0           | 0 | 0           | 0 | 0            | 0 |
| 0 | 0           | 0 | 0           | 0 | 0           | 0 | -0.004048986 | 0 |
| 0 | 0.44163154  | 0 | 0           | 0 | 0           | 0 | 0.007982472  | 0 |



|   |             |   |             |   |             |   |              |   |
|---|-------------|---|-------------|---|-------------|---|--------------|---|
| 0 | 0           | 0 | 0           | 0 | 0           | 0 | -0.043734817 | 0 |
| 0 | 0           | 0 | 0           | 0 | 0           | 0 | 0            | 0 |
| 0 | 0           | 0 | 0           | 0 | 0           | 0 | 0            | 0 |
| 0 | -0.18108673 | 0 | 0           | 0 | 0           | 0 | 0            | 0 |
| 0 | 0.44084746  | 0 | 0           | 0 | 0           | 0 | 0            | 0 |
| 0 | 0           | 0 | 0           | 0 | 0           | 0 | -0.008910319 | 0 |
| 0 | 0.44023898  | 0 | 0           | 0 | 0           | 0 | -0.003131268 | 0 |
| 0 | 0           | 0 | 0           | 0 | 0.15115903  | 0 | 0            | 0 |
| 0 | 0           | 0 | 0           | 0 | 0           | 0 | 0            | 0 |
| 0 | 0           | 0 | 0.14987752  | 0 | 0           | 0 | 0            | 0 |
| 0 | 0           | 0 | 0           | 0 | 0           | 0 | -0.000303724 | 0 |
| 0 | 0.41973469  | 0 | 0           | 0 | 0           | 0 | -0.004240698 | 0 |
| 0 | 0.41992426  | 0 | 0           | 0 | 0           | 0 | 0            | 0 |
| 0 | 0           | 0 | 0           | 0 | 0           | 0 | 0            | 0 |
| 0 | 0           | 0 | 0           | 0 | 0           | 0 | -0.017311831 | 0 |
| 0 | -0.19589538 | 0 | 0           | 0 | 0           | 0 | 0            | 0 |
| 0 | 0.43417392  | 0 | 0           | 0 | 0           | 0 | -0.008452656 | 0 |
| 0 | -0.18605641 | 0 | 0           | 0 | 0           | 0 | -0.003160226 | 0 |
| 0 | 0           | 0 | 0           | 0 | 0           | 0 | 0.007974499  | 0 |
| 0 | 0           | 0 | 0.067209588 | 0 | 0.095692814 | 0 | 0            | 0 |
| 0 | -0.1588897  | 0 | 0           | 0 | 0           | 0 | 0            | 0 |
| 0 | 0           | 0 | 0.065383647 | 0 | 0.10163028  | 0 | 0            | 0 |
| 0 | 0           | 0 | 0           | 0 | 0.16149722  | 0 | -0.007640688 | 0 |
| 0 | 0           | 0 | 0.1722937   | 0 | 0           | 0 | 0.026475101  | 0 |
| 0 | 0           | 0 | 0           | 0 | 0           | 0 | 0.007388979  | 0 |
| 0 | 0           | 0 | 0.066516472 | 0 | 0.10114974  | 0 | -0.003202833 | 0 |
| 0 | 0.4700831   | 0 | 0.12932689  | 0 | 0.050606908 | 0 | 0            | 0 |
| 0 | 0           | 0 | 0           | 0 | 0.1736993   | 0 | 0.026145648  | 0 |
| 0 | 0           | 0 | 0           | 0 | 0.17264103  | 0 | 0.026060908  | 0 |
| 0 | 0           | 0 | 0.17348428  | 0 | 0           | 0 | 0.026422327  | 0 |
| 0 | 0           | 0 | 0           | 0 | 0.16586704  | 0 | 0.000490775  | 0 |
| 0 | -0.18649321 | 0 | 0           | 0 | 0           | 0 | -0.008018318 | 0 |
| 0 | 0           | 0 | 0.1602668   | 0 | 0           | 0 | -0.007286545 | 0 |
| 0 | -0.22751362 | 0 | 0           | 0 | 0           | 0 | -0.044032276 | 0 |
| 0 | -0.20810121 | 0 | 0           | 0 | 0           | 0 | 0            | 0 |
| 0 | 0           | 0 | 0.16493836  | 0 | 0           | 0 | 0.00108027   | 0 |
| 0 | 0.38568125  | 0 | 0           | 0 | 0           | 0 | 0            | 0 |
| 0 | 0           | 0 | 0.086874063 | 0 | 0.093425582 | 0 | 0.023903076  | 0 |
| 0 | 0           | 0 | 0.16977127  | 0 | 0           | 0 | 0            | 0 |
| 0 | 0           | 0 | 0           | 0 | 0.17012598  | 0 | 0            | 0 |
| 0 | 0.44523871  | 0 | 0           | 0 | 0           | 0 | -0.0602341   | 0 |
| 0 | 0           | 0 | 0           | 0 | 0           | 0 | -0.008484866 | 0 |
| 0 | -0.21748176 | 0 | 0           | 0 | 0           | 0 | 0            | 0 |
| 0 | 0           | 0 | 0.084402848 | 0 | 0.082855156 | 0 | 0.038056319  | 0 |
| 0 | 0.3969358   | 0 | 0           | 0 | 0           | 0 | 0            | 0 |
| 0 | 0           | 0 | 0.090468499 | 0 | 0.085303447 | 0 | 0            | 0 |
| 0 | 0           | 0 | 0.085322961 | 0 | 0.091478453 | 0 | 0            | 0 |



|   |             |   |             |   |             |              |   |
|---|-------------|---|-------------|---|-------------|--------------|---|
| 0 | 0           | 0 | 0.13295152  | 0 | 0           | 0.034195472  | 0 |
| 0 | 0           | 0 | 0           | 0 | 0.13229376  | 0.033972773  | 0 |
| 0 | 0           | 0 | 0.083146766 | 0 | 0.050145744 | 0.040702998  | 0 |
| 0 | 0           | 0 | 0.13237462  | 0 | 0           | 0.040908066  | 0 |
| 0 | -0.18943281 | 0 | 0           | 0 | 0           | -0.018279665 | 0 |
| 0 | 0.43739756  | 0 | 0           | 0 | 0           | -0.016413781 | 0 |
| 0 | 0           | 0 | 0           | 0 | 0.13229084  | 0.040681528  | 0 |
| 0 | 0           | 0 | 0.14879229  | 0 | 0           | 0.03137453   | 0 |
| 0 | 0           | 0 | 0           | 0 | 0           | 0.025535943  | 0 |
| 0 | 0           | 0 | 0.088595355 | 0 | 0.053731746 | 0.036170344  | 0 |
| 0 | 0           | 0 | 0           | 0 | 0.14884697  | 0.031074853  | 0 |
| 0 | 0.44864463  | 0 | 0           | 0 | 0           | 0            | 0 |
| 0 | 0           | 0 | 0.091789135 | 0 | 0.047696858 | 0.031162805  | 0 |
| 0 | 0           | 0 | 0.14434643  | 0 | 0           | 0            | 0 |
| 0 | -0.20110666 | 0 | 0           | 0 | 0           | -0.009433746 | 0 |
| 0 | 0           | 0 | 0           | 0 | 0.14445899  | 0            | 0 |
| 0 | 0           | 0 | 0.085158097 | 0 | 0.050706692 | 0            | 0 |
| 0 | 0           | 0 | 0           | 0 | 0           | -0.027570037 | 0 |
| 0 | 0           | 0 | 0.091068235 | 0 | 0.060665447 | 0            | 0 |
| 0 | 0.4114862   | 0 | 0           | 0 | 0           | -0.015806828 | 0 |
| 0 | 0           | 0 | 0           | 0 | 0           | -0.016659427 | 0 |
| 0 | 0           | 0 | 0           | 0 | 0           | 0.01899745   | 0 |
| 0 | 0           | 0 | 0.080357364 | 0 | 0.052113401 | 0            | 0 |
| 0 | -0.17567714 | 0 | 0           | 0 | 0           | -0.01587048  | 0 |
| 0 | 0.36514458  | 0 | 0           | 0 | 0           | -0.045917812 | 0 |
| 0 | 0           | 0 | 0           | 0 | 0           | 0.021358341  | 0 |
| 0 | 0           | 0 | 0           | 0 | 0           | 0            | 0 |
| 0 | 0           | 0 | 0           | 0 | 0           | 0.028941613  | 0 |
| 0 | 0           | 0 | 0           | 0 | 0           | 0.003780456  | 0 |
| 0 | 0           | 0 | 0.080733164 | 0 | 0.07158241  | 0.027803414  | 0 |
| 0 | 0           | 0 | 0.15063279  | 0 | 0           | 0.027767325  | 0 |
| 0 | 0           | 0 | 0           | 0 | 0.15114112  | 0.027538708  | 0 |
| 0 | 0           | 0 | 0.079748914 | 0 | 0.059522348 | 0.02753308   | 0 |
| 0 | 0           | 0 | 0.08020525  | 0 | 0.073908993 | 0            | 0 |
| 0 | 0           | 0 | 0.087345328 | 0 | 0.073506217 | 0.023937016  | 0 |
| 0 | 0           | 0 | 0           | 0 | 0           | 0.01680225   | 0 |
| 0 | 0           | 0 | 0           | 0 | 0           | 0.019938305  | 0 |
| 0 | 0           | 0 | 0           | 0 | 0           | 0.039860834  | 0 |
| 0 | 0           | 0 | 0           | 0 | 0           | 0.03935642   | 0 |
| 0 | 0.47816353  | 0 | 0.13338807  | 0 | 0           | 0            | 0 |
| 0 | 0.47796635  | 0 | 0           | 0 | 0.13348813  | 0            | 0 |
| 0 | 0.47246108  | 0 | 0.13921515  | 0 | 0           | 0            | 0 |
| 0 | 0.47232618  | 0 | 0           | 0 | 0.13955877  | 0            | 0 |
| 0 | 0.47861843  | 0 | 0.13530335  | 0 | 0           | 0            | 0 |
| 0 | 0.47838431  | 0 | 0           | 0 | 0.13552171  | 0            | 0 |
| 0 | 0.47120221  | 0 | 0.14665459  | 0 | 0           | -0.019285496 | 0 |
| 0 | 0.47089268  | 0 | 0           | 0 | 0.14692221  | -0.019544484 | 0 |

|   |             |   |             |   |             |   |              |   |
|---|-------------|---|-------------|---|-------------|---|--------------|---|
| 0 | 0.47695553  | 0 | 0.087773942 | 0 | 0.066418451 | 0 | 0            | 0 |
| 0 | 0.47638755  | 0 | 0.15270642  | 0 | 0           | 0 | 0            | 0 |
| 0 | 0           | 0 | 0.12942703  | 0 | 0           | 0 | 0            | 0 |
| 0 | 0.47681492  | 0 | 0           | 0 | 0.15337342  | 0 | 0            | 0 |
| 0 | 0           | 0 | 0           | 0 | 0.12954585  | 0 | 0            | 0 |
| 0 | 0           | 0 | 0.13634485  | 0 | 0           | 0 | 0            | 0 |
| 0 | 0           | 0 | 0.1327733   | 0 | 0           | 0 | -0.010788002 | 0 |
| 0 | 0           | 0 | 0.077467323 | 0 | 0.057690327 | 0 | 0            | 0 |
| 0 | 0           | 0 | 0           | 0 | 0.13674973  | 0 | 0            | 0 |
| 0 | 0           | 0 | 0.13098558  | 0 | 0           | 0 | 0            | 0 |
| 0 | 0           | 0 | 0           | 0 | 0.13288188  | 0 | -0.010951689 | 0 |
| 0 | 0           | 0 | 0.13685552  | 0 | 0           | 0 | -0.012359392 | 0 |
| 0 | 0           | 0 | 0.14181248  | 0 | 0           | 0 | 0            | 0 |
| 0 | 0           | 0 | 0.083617016 | 0 | 0.056544174 | 0 | 0            | 0 |
| 0 | 0           | 0 | 0           | 0 | 0.13117258  | 0 | 0            | 0 |
| 0 | 0           | 0 | 0.13430362  | 0 | 0           | 0 | 0            | 0 |
| 0 | 0           | 0 | 0           | 0 | 0.13715924  | 0 | -0.012758501 | 0 |
| 0 | 0           | 0 | 0.1358115   | 0 | 0           | 0 | 0            | 0 |
| 0 | 0           | 0 | 0           | 0 | 0.1423793   | 0 | 0            | 0 |
| 0 | 0           | 0 | 0           | 0 | 0.13447454  | 0 | 0            | 0 |
| 0 | 0           | 0 | 0.13515143  | 0 | 0           | 0 | -0.01169805  | 0 |
| 0 | 0           | 0 | 0           | 0 | 0.13619581  | 0 | 0            | 0 |
| 0 | 0           | 0 | 0.080258927 | 0 | 0.056267404 | 0 | 0            | 0 |
| 0 | 0           | 0 | 0           | 0 | 0.13541962  | 0 | -0.012018524 | 0 |
| 0 | 0           | 0 | 0.083444552 | 0 | 0.064054067 | 0 | -0.019213213 | 0 |
| 0 | -0.14854246 | 0 | 0.12983906  | 0 | 0           | 0 | 0            | 0 |
| 0 | -0.12519145 | 0 | 0.13738822  | 0 | 0           | 0 | 0            | 0 |
| 0 | 0           | 0 | 0.14781891  | 0 | 0           | 0 | -0.020445316 | 0 |
| 0 | -0.14865425 | 0 | 0           | 0 | 0.12995839  | 0 | 0            | 0 |
| 0 | -0.12425397 | 0 | 0           | 0 | 0.13781757  | 0 | 0            | 0 |
| 0 | 0.46292523  | 0 | 0.15332151  | 0 | 0           | 0 | 0            | 0 |
| 0 | -0.14533405 | 0 | 0.077627891 | 0 | 0.057879928 | 0 | 0            | 0 |
| 0 | -0.14853165 | 0 | 0.13315392  | 0 | 0           | 0 | -0.010183129 | 0 |
| 0 | 0           | 0 | 0           | 0 | 0.14841905  | 0 | -0.020917882 | 0 |
| 0 | 0.46304388  | 0 | 0           | 0 | 0.15356599  | 0 | 0            | 0 |
| 0 | -0.13259945 | 0 | 0.14292487  | 0 | 0           | 0 | 0            | 0 |
| 0 | -0.14494904 | 0 | 0.13108635  | 0 | 0           | 0 | 0            | 0 |
| 0 | -0.11650144 | 0 | 0.13601232  | 0 | 0           | 0 | 0            | 0 |
| 0 | -0.1487636  | 0 | 0           | 0 | 0.13328319  | 0 | -0.01033782  | 0 |
| 0 | -0.15377913 | 0 | 0.13721883  | 0 | 0           | 0 | -0.01175438  | 0 |
| 0 | -0.15080406 | 0 | 0.083740157 | 0 | 0.056699963 | 0 | 0            | 0 |
| 0 | -0.14516225 | 0 | 0           | 0 | 0.13126883  | 0 | 0            | 0 |
| 0 | -0.11558789 | 0 | 0           | 0 | 0.13643126  | 0 | 0            | 0 |
| 0 | -0.13210652 | 0 | 0           | 0 | 0.14351622  | 0 | 0            | 0 |
| 0 | -0.14895279 | 0 | 0.13428702  | 0 | 0           | 0 | 0            | 0 |
| 0 | -0.15405257 | 0 | 0           | 0 | 0.13752985  | 0 | -0.012153319 | 0 |
| 0 | 0           | 0 | 0.087363838 | 0 | 0.066098716 | 0 | 0            | 0 |

|   |             |   |             |            |             |              |              |
|---|-------------|---|-------------|------------|-------------|--------------|--------------|
| 0 | -0.14907438 | 0 | 0           | 0.1344562  | 0           | 0            | 0            |
| 0 | -0.14848853 | 0 | 0.13506089  | 0          | 0           | -0.010813302 | 0            |
| 0 | -0.14490497 | 0 | 0.080230892 | 0          | 0.056254137 | 0            | 0            |
| 0 | -0.14876148 | 0 | 0           | 0.13535513 | 0           | -0.011123202 | 0            |
| 0 | -0.15204124 | 0 | 0.083690723 | 0          | 0.064113937 | 0            | -0.018546285 |
| 0 | -0.14355994 | 0 | 0.14923221  | 0          | 0           | 0            | -0.020525691 |
| 0 | -0.14292836 | 0 | 0           | 0.14987691 | 0           | -0.020968338 | 0            |
| 0 | 0           | 0 | 0.14877982  | 0          | 0           | 0            | 0            |
| 0 | -0.14373062 | 0 | 0.087621359 | 0          | 0.067295713 | 0            | 0            |
| 0 | 0           | 0 | 0           | 0.14899205 | 0           | 0            | 0            |
| 0 | 0.46888568  | 0 | 0           | 0.15943537 | 0           | 0            | 0            |
| 0 | 0.46886253  | 0 | 0.15916657  | 0          | 0           | 0            | 0            |
| 0 | 0           | 0 | 0.082899021 | 0          | 0.071581044 | 0            | 0            |
| 0 | 0           | 0 | 0.15306824  | 0          | 0           | 0            | -0.010979557 |
| 0 | 0           | 0 | 0           | 0.15335996 | 0           | -0.011362561 | 0            |
| 0 | 0           | 0 | 0.15217772  | 0          | 0           | 0            | 0            |
| 0 | 0.46917358  | 0 | 0.080885236 | 0          | 0.084722307 | 0            | 0            |
| 0 | 0           | 0 | 0           | 0.15265558 | 0           | 0            | 0            |
| 0 | 0.46448549  | 0 | 0           | 0.16429864 | 0           | -0.013659847 | 0            |
| 0 | 0.45246501  | 0 | 0.15993936  | 0          | 0           | 0            | 0            |
| 0 | 0.46458615  | 0 | 0.16397673  | 0          | 0           | 0            | -0.013320597 |
| 0 | 0.45415398  | 0 | 0           | 0.16052278 | 0           | 0            | 0            |
| 0 | 0.46290136  | 0 | 0           | 0.1472176  | 0           | 0            | 0            |
| 0 | 0.46274401  | 0 | 0.14674481  | 0          | 0           | 0            | 0            |
| 0 | 0.46302241  | 0 | 0.065467922 | 0          | 0.077453063 | 0            | 0            |
| 0 | -0.16044151 | 0 | 0.14922429  | 0          | 0           | 0            | 0            |
| 0 | 0.46605487  | 0 | 0           | 0.14342094 | 0           | 0.009978835  | 0            |
| 0 | -0.160329   | 0 | 0           | 0.1494392  | 0           | 0            | 0            |
| 0 | 0.46615053  | 0 | 0.14261389  | 0          | 0           | 0.010805978  | 0            |
| 0 | 0.46939209  | 0 | 0           | 0.143562   | 0           | 0            | 0            |
| 0 | 0.46827859  | 0 | 0.14227978  | 0          | 0           | 0            | 0            |
| 0 | -0.16025902 | 0 | 0.082799712 | 0          | 0.071969059 | 0            | 0            |
| 0 | -0.16371023 | 0 | 0.15332797  | 0          | 0           | 0            | -0.010085617 |
| 0 | -0.16371287 | 0 | 0           | 0.15362324 | 0           | -0.010476233 | 0            |
| 0 | 0.46705674  | 0 | 0.072061065 | 0          | 0.083845193 | 0            | 0            |
| 0 | -0.16020375 | 0 | 0.15319862  | 0          | 0           | 0            | 0            |
| 0 | 0.46798606  | 0 | 0.070478517 | 0          | 0.083363462 | 0            | 0.003633012  |
| 0 | 0.46285409  | 0 | 0.068995959 | 0          | 0.082198955 | 0            | 0            |
| 0 | -0.1587596  | 0 | 0           | 0.15371317 | 0           | 0            | 0            |
| 0 | 0.46081121  | 0 | 0           | 0.1530645  | 0           | 0            | 0            |
| 0 | 0.46297591  | 0 | 0           | 0.15130809 | 0           | 0.00378025   | 0            |
| 0 | 0.4672039   | 0 | 0           | 0.15466085 | 0           | 0.001088051  | 0            |
| 0 | 0.45914111  | 0 | 0.15231083  | 0          | 0           | 0            | 0            |
| 0 | 0.4617409   | 0 | 0.15021507  | 0          | 0           | 0.004637864  | 0            |
| 0 | 0.4673481   | 0 | 0.15427685  | 0          | 0           | 0.001471596  | 0            |
| 0 | 0           | 0 | 0.076774978 | 0          | 0.08394068  | 0            | 0            |
| 0 | 0           | 0 | 0           | 0.15582206 | 0           | 0            | 0            |

|   |             |   |             |   |             |   |              |
|---|-------------|---|-------------|---|-------------|---|--------------|
| 0 | 0           | 0 | 0.15527854  | 0 | 0           | 0 | 0            |
| 0 | 0           | 0 | 0           | 0 | 0.15962536  | 0 | -0.011687648 |
| 0 | 0           | 0 | 0.15932445  | 0 | 0           | 0 | -0.011392818 |
| 0 | 0           | 0 | 0.079479706 | 0 | 0.085438928 | 0 | -0.013720789 |
| 0 | 0           | 0 | 0.081917621 | 0 | 0.079123408 | 0 | 0            |
| 0 | 0           | 0 | 0.15932861  | 0 | 0           | 0 | -0.013009735 |
| 0 | 0           | 0 | 0           | 0 | 0.15994556  | 0 | -0.013386036 |
| 0 | 0           | 0 | 0.072396313 | 0 | 0.076000783 | 0 | 0            |
| 0 | 0           | 0 | 0           | 0 | 0.1469824   | 0 | 0.004645549  |
| 0 | 0           | 0 | 0.068227328 | 0 | 0.075681068 | 0 | 0.01035245   |
| 0 | 0           | 0 | 0.14650631  | 0 | 0           | 0 | 0.005133935  |
| 0 | 0           | 0 | 0           | 0 | 0.14755268  | 0 | 0            |
| 0 | 0           | 0 | 0.14683043  | 0 | 0           | 0 | 0            |
| 0 | 0           | 0 | 0.064820258 | 0 | 0.07879169  | 0 | 0            |
| 0 | -0.15441755 | 0 | 0.076944803 | 0 | 0.08411168  | 0 | 0            |
| 0 | 0           | 0 | 0           | 0 | 0.14383043  | 0 | 0.009586832  |
| 0 | 0           | 0 | 0.14274233  | 0 | 0           | 0 | 0.010485211  |
| 0 | -0.15809578 | 0 | 0           | 0 | 0.15994176  | 0 | -0.010827808 |
| 0 | -0.15801644 | 0 | 0.15964074  | 0 | 0           | 0 | -0.010527552 |
| 0 | -0.16511863 | 0 | 0           | 0 | 0.15713741  | 0 | 0            |
| 0 | -0.16684631 | 0 | 0.15655605  | 0 | 0           | 0 | 0            |
| 0 | -0.1585415  | 0 | 0.080079075 | 0 | 0.085307043 | 0 | -0.012755611 |
| 0 | 0           | 0 | 0.13571574  | 0 | 0           | 0 | 0            |
| 0 | 0           | 0 | 0           | 0 | 0.13639631  | 0 | 0            |
| 0 | -0.16705806 | 0 | 0.08160104  | 0 | 0.080596581 | 0 | 0            |
| 0 | 0           | 0 | 0.072764578 | 0 | 0.081131615 | 0 | 0            |
| 0 | 0           | 0 | 0.07201289  | 0 | 0.083973236 | 0 | 0.000600055  |
| 0 | 0           | 0 | 0.07023633  | 0 | 0.081079007 | 0 | 0.004384565  |
| 0 | -0.17198545 | 0 | 0.16044612  | 0 | 0           | 0 | -0.012197375 |
| 0 | -0.17038199 | 0 | 0           | 0 | 0.16109944  | 0 | -0.012580057 |
| 0 | -0.16045511 | 0 | 0.072567192 | 0 | 0.076276367 | 0 | 0            |
| 0 | 0           | 0 | 0           | 0 | 0.1526842   | 0 | 0.000886194  |
| 0 | 0           | 0 | 0.15195095  | 0 | 0           | 0 | 0.001347957  |
| 0 | -0.15894005 | 0 | 0           | 0 | 0.14741663  | 0 | 0.005201889  |
| 0 | -0.15448663 | 0 | 0           | 0 | 0.1486964   | 0 | 0            |
| 0 | -0.15692251 | 0 | 0.068284502 | 0 | 0.07601668  | 0 | 0.010965331  |
| 0 | -0.15894048 | 0 | 0.14695263  | 0 | 0           | 0 | 0.005697264  |
| 0 | -0.15599771 | 0 | 0.14794323  | 0 | 0           | 0 | 0            |
| 0 | 0           | 0 | 0.13999027  | 0 | 0           | 0 | 0            |
| 0 | 0           | 0 | 0.073591166 | 0 | 0.068747426 | 0 | 0            |
| 0 | -0.15150655 | 0 | 0.064898932 | 0 | 0.079875481 | 0 | 0            |
| 0 | 0           | 0 | 0           | 0 | 0.14065141  | 0 | 0            |
| 0 | -0.14961899 | 0 | 0           | 0 | 0.14502917  | 0 | 0.009989315  |
| 0 | -0.15071949 | 0 | 0.14391279  | 0 | 0           | 0 | 0.010894626  |
| 0 | 0           | 0 | 0.14042206  | 0 | 0           | 0 | -0.001599542 |
| 0 | 0           | 0 | 0           | 0 | 0.14113952  | 0 | -0.002035057 |
| 0 | 0           | 0 | 0.14529712  | 0 | 0           | 0 | 0            |

|   |             |   |             |   |             |   |              |   |
|---|-------------|---|-------------|---|-------------|---|--------------|---|
| 0 | 0           | 0 | 0           | 0 | 0.14599604  | 0 | 0            | 0 |
| 0 | -0.16087382 | 0 | 0.072704581 | 0 | 0.082517222 | 0 | 0            | 0 |
| 0 | -0.15597652 | 0 | 0.072481439 | 0 | 0.083903388 | 0 | 0.001178097  | 0 |
| 0 | 0.48309311  | 0 | 0.13828203  | 0 | 0           | 0 | 0            | 0 |
| 0 | -0.15802823 | 0 | 0.070341834 | 0 | 0.08244926  | 0 | 0.004561701  | 0 |
| 0 | 0.44848791  | 0 | 0.12311001  | 0 | 0           | 0 | 0            | 0 |
| 0 | 0.4844377   | 0 | 0           | 0 | 0.13845913  | 0 | 0            | 0 |
| 0 | -0.16043586 | 0 | 0           | 0 | 0.15398577  | 0 | 0.001242268  | 0 |
| 0 | -0.1619915  | 0 | 0.1532471   | 0 | 0           | 0 | 0.00170399   | 0 |
| 0 | 0.44846143  | 0 | 0           | 0 | 0.12257416  | 0 | 0            | 0 |
| 0 | 0.44737423  | 0 | 0.13991158  | 0 | 0           | 0 | 0            | 0 |
| 0 | 0.49326526  | 0 | 0.13157587  | 0 | 0           | 0 | 0            | 0 |
| 0 | 0.4936445   | 0 | 0           | 0 | 0.13226422  | 0 | 0            | 0 |
| 0 | 0.44726682  | 0 | 0           | 0 | 0.14013967  | 0 | 0            | 0 |
| 0 | 0.48648128  | 0 | 0.069207356 | 0 | 0.065722496 | 0 | 0            | 0 |
| 0 | 0           | 0 | 0.075131138 | 0 | 0.078893971 | 0 | 0            | 0 |
| 0 | 0           | 0 | 0.13309584  | 0 | 0           | 0 | 0            | 0 |
| 0 | 0.48605882  | 0 | 0.13355866  | 0 | 0           | 0 | 0.003440071  | 0 |
| 0 | 0.48515375  | 0 | 0.13341822  | 0 | 0           | 0 | 0            | 0 |
| 0 | 0.44463493  | 0 | 0.12802163  | 0 | 0           | 0 | -0.010796835 | 0 |
| 0 | 0.487131    | 0 | 0           | 0 | 0.13421692  | 0 | 0.002500078  | 0 |
| 0 | 0.48659757  | 0 | 0           | 0 | 0.13383623  | 0 | 0            | 0 |
| 0 | 0           | 0 | 0           | 0 | 0.15243021  | 0 | -0.00858168  | 0 |
| 0 | 0.44803731  | 0 | 0.082656739 | 0 | 0.046005059 | 0 | 0            | 0 |
| 0 | 0           | 0 | 0           | 0 | 0.13325395  | 0 | 0            | 0 |
| 0 | 0           | 0 | 0.15167824  | 0 | 0           | 0 | -0.00824318  | 0 |
| 0 | 0.44436255  | 0 | 0           | 0 | 0.1275187   | 0 | -0.011131662 | 0 |
| 0 | 0           | 0 | 0.13449392  | 0 | 0           | 0 | 0            | 0 |
| 0 | 0           | 0 | 0           | 0 | 0.13468848  | 0 | 0            | 0 |
| 0 | 0           | 0 | 0.13773887  | 0 | 0           | 0 | -0.011407474 | 0 |
| 0 | 0           | 0 | 0.079897984 | 0 | 0.058975627 | 0 | 0            | 0 |
| 0 | 0           | 0 | 0.14052164  | 0 | 0           | 0 | 0            | 0 |
| 0 | -0.13685403 | 0 | 0.13442684  | 0 | 0           | 0 | 0            | 0 |
| 0 | 0           | 0 | 0           | 0 | 0.13794063  | 0 | -0.011773406 | 0 |
| 0 | 0           | 0 | 0.077406149 | 0 | 0.046349488 | 0 | 0            | 0 |
| 0 | 0           | 0 | 0.12323247  | 0 | 0           | 0 | -0.008399923 | 0 |
| 0 | -0.1354779  | 0 | 0           | 0 | 0.13463335  | 0 | 0            | 0 |
| 0 | 0           | 0 | 0           | 0 | 0.14093221  | 0 | 0            | 0 |
| 0 | 0.4493146   | 0 | 0.073024838 | 0 | 0.049127224 | 0 | 0            | 0 |
| 0 | 0.45051132  | 0 | 0.072583278 | 0 | 0.051198494 | 0 | 0.003837145  | 0 |
| 0 | 0.44922715  | 0 | 0.071937176 | 0 | 0.051814472 | 0 | 0            | 0 |
| 0 | 0.44929254  | 0 | 0.11972394  | 0 | 0           | 0 | 0            | 0 |
| 0 | 0.4498494   | 0 | 0.12143934  | 0 | 0           | 0 | 0.002309268  | 0 |
| 0 | 0           | 0 | 0           | 0 | 0.12272715  | 0 | -0.008666925 | 0 |
| 0 | 0.45049244  | 0 | 0.12265866  | 0 | 0           | 0 | 0.004356914  | 0 |
| 0 | 0           | 0 | 0.13975534  | 0 | 0           | 0 | -0.011043266 | 0 |
| 0 | 0           | 0 | 0.083239323 | 0 | 0.057930418 | 0 | 0            | 0 |

|   |             |   |             |            |             |              |              |
|---|-------------|---|-------------|------------|-------------|--------------|--------------|
| 0 | 0.44912202  | 0 | 0           | 0.11979746 | 0           | 0            | 0            |
| 0 | 0.44956408  | 0 | 0           | 0.12167006 | 0           | 0.001916404  | 0            |
| 0 | 0           | 0 | 0.12581532  | 0          | 0           | 0            | 0            |
| 0 | 0.45035896  | 0 | 0           | 0.12232249 | 0           | 0.003906726  | 0            |
| 0 | 0           | 0 | 0.073757006 | 0          | 0.058619793 | 0            | 0            |
| 0 | 0           | 0 | 0           | 0.14003466 | 0           | -0.011397345 | 0            |
| 0 | 0           | 0 | 0           | 0.12640247 | 0           | 0            | 0            |
| 0 | 0           | 0 | 0.088654761 | 0          | 0.078900033 | 0            | 0            |
| 0 | 0           | 0 | 0.13031654  | 0          | 0           | -0.003753437 | 0            |
| 0 | 0           | 0 | 0.16428392  | 0          | 0           | -0.012539827 | 0            |
| 0 | 0           | 0 | 0           | 0.16515672 | 0           | -0.013100228 | 0            |
| 0 | 0           | 0 | 0           | 0.13094806 | 0           | -0.00423034  | 0            |
| 0 | -0.13688316 | 0 | 0.079641109 | 0          | 0.06046087  | 0            | 0            |
| 0 | -0.14121798 | 0 | 0.13891944  | 0          | 0           | -0.010591777 | 0            |
| 0 | -0.17559917 | 0 | 0.13467843  | 0          | 0           | 0            | 0            |
| 0 | 0           | 0 | 0.069863775 | 0          | 0.064477481 | 0            | 0.002940527  |
| 0 | 0           | 0 | 0.069505537 | 0          | 0.06491611  | 0            | 0            |
| 0 | 0           | 0 | 0.081581373 | 0          | 0.046877389 | 0            | -0.011130029 |
| 0 | -0.13995517 | 0 | 0           | 0.13917099 | 0           | -0.01097026  | 0            |
| 0 | -0.14244271 | 0 | 0.14077361  | 0          | 0           | 0            | 0            |
| 0 | -0.17568625 | 0 | 0           | 0.13488097 | 0           | 0            | 0            |
| 0 | 0           | 0 | 0.13274012  | 0          | 0           | 0.003302504  | 0            |
| 0 | -0.14146058 | 0 | 0           | 0.14124319 | 0           | 0            | 0            |
| 0 | 0           | 0 | 0           | 0.13314425 | 0           | 0.002811383  | 0            |
| 0 | -0.12154806 | 0 | 0.12681724  | 0          | 0           | 0            | 0            |
| 0 | -0.1269177  | 0 | 0.07390094  | 0          | 0.059631388 | 0            | 0            |
| 0 | -0.12070559 | 0 | 0           | 0.1273013  | 0           | 0            | 0            |
| 0 | -0.17494927 | 0 | 0.077663667 | 0          | 0.046289863 | 0            | 0            |
| 0 | -0.17740139 | 0 | 0.12338456  | 0          | 0           | -0.007508782 | 0            |
| 0 | -0.12785082 | 0 | 0.13146239  | 0          | 0           | -0.003636018 | 0            |
| 0 | -0.17616492 | 0 | 0.079785073 | 0          | 0.06142548  | 0            | 0            |
| 0 | -0.17937125 | 0 | 0.13975556  | 0          | 0           | -0.010119103 | 0            |
| 0 | -0.17755586 | 0 | 0           | 0.12287601 | 0           | -0.007773666 | 0            |
| 0 | -0.12732025 | 0 | 0           | 0.13211669 | 0           | -0.004115626 | 0            |
| 0 | -0.17958856 | 0 | 0           | 0.14003354 | 0           | -0.01047395  | 0            |
| 0 | -0.13395578 | 0 | 0.06816075  | 0          | 0.067454197 | 0            | 0.003402911  |
| 0 | -0.13487023 | 0 | 0.069411795 | 0          | 0.066315973 | 0            | 0            |
| 0 | -0.13504113 | 0 | 0.13398443  | 0          | 0           | 0.003833106  | 0            |
| 0 | -0.13376044 | 0 | 0           | 0.1344301  | 0           | 0.003325416  | 0            |
| 0 | 0           | 0 | 0.073069493 | 0          | 0.04910794  | 0            | 0.002182433  |
| 0 | 0           | 0 | 0.07258003  | 0          | 0.048640507 | 0            | 0            |
| 0 | 0           | 0 | 0.072373412 | 0          | 0.051078483 | 0            | 0.003472062  |
| 0 | -0.17874039 | 0 | 0.081677318 | 0          | 0.046803103 | 0            | -0.010206031 |
| 0 | 0           | 0 | 0.12006545  | 0          | 0           | 0.002752623  | 0            |
| 0 | 0           | 0 | 0           | 0.11992811 | 0           | 0.002456862  | 0            |
| 0 | -0.1734981  | 0 | 0.072911968 | 0          | 0.049515883 | 0            | 0.002923685  |
| 0 | -0.17429359 | 0 | 0.070991507 | 0          | 0.050616239 | 0            | 0            |



|   |             |   |             |   |             |   |              |   |
|---|-------------|---|-------------|---|-------------|---|--------------|---|
| 0 | 0           | 0 | 0.091097002 | 0 | 0.091758282 | 0 | -0.023175216 | 0 |
| 0 | -0.17311324 | 0 | 0.07263461  | 0 | 0.050973548 | 0 | 0.004028428  | 0 |
| 0 | -0.1733003  | 0 | 0.12045397  | 0 | 0           | 0 | 0.003400272  | 0 |
| 0 | -0.17345631 | 0 | 0           | 0 | 0.12057434  | 0 | 0.003144916  | 0 |
| 0 | 0           | 0 | 0           | 0 | 0.1751172   | 0 | 0            | 0 |
| 0 | 0.47418132  | 0 | 0           | 0 | 0           | 0 | 0            | 0 |
| 0 | 0           | 0 | 0.17414689  | 0 | 0           | 0 | 0            | 0 |
| 0 | 0           | 0 | 0.079168569 | 0 | 0.10210624  | 0 | 0            | 0 |
| 0 | 0.46365289  | 0 | 0           | 0 | 0           | 0 | 0            | 0 |
| 0 | 0           | 0 | 0.067910013 | 0 | 0.073098704 | 0 | 0            | 0 |
| 0 | 0           | 0 | 0           | 0 | 0.17956799  | 0 | 0.005564917  | 0 |
| 0 | 0           | 0 | 0           | 0 | 0.14183527  | 0 | 0            | 0 |
| 0 | 0           | 0 | 0           | 0 | 0.13992819  | 0 | 0.004509322  | 0 |
| 0 | 0           | 0 | 0.14100839  | 0 | 0           | 0 | 0            | 0 |
| 0 | 0           | 0 | 0.13916067  | 0 | 0           | 0 | 0.004939035  | 0 |
| 0 | 0           | 0 | 0.1785579   | 0 | 0           | 0 | 0.006233587  | 0 |
| 0 | 0           | 0 | 0.070792337 | 0 | 0.10288975  | 0 | 0.018174168  | 0 |
| 0 | 0           | 0 | 0           | 0 | 0           | 0 | 0            | 0 |
| 0 | 0           | 0 | 0           | 0 | 0.17198195  | 0 | 0.018515223  | 0 |
| 0 | 0.46913197  | 0 | 0           | 0 | 0           | 0 | 0            | 0 |
| 0 | 0           | 0 | 0           | 0 | 0           | 0 | 0            | 0 |
| 0 | 0           | 0 | 0.074563464 | 0 | 0.074738545 | 0 | 0            | 0 |
| 0 | 0           | 0 | 0.17082297  | 0 | 0           | 0 | 0.01931341   | 0 |
| 0 | 0           | 0 | 0           | 0 | 0           | 0 | -0.005952974 | 0 |
| 0 | 0           | 0 | 0.068372922 | 0 | 0.10629123  | 0 | 0            | 0 |
| 0 | 0           | 0 | 0.078004689 | 0 | 0.077685649 | 0 | -0.002496287 | 0 |
| 0 | 0.48072488  | 0 | 0           | 0 | 0.13897083  | 0 | -0.015347723 | 0 |
| 0 | 0           | 0 | 0.14713914  | 0 | 0           | 0 | 0.001191625  | 0 |
| 0 | 0           | 0 | 0           | 0 | 0.14795998  | 0 | 0.000701573  | 0 |
| 0 | 0.47932357  | 0 | 0.13838451  | 0 | 0           | 0 | -0.014896669 | 0 |
| 0 | 0.4899404   | 0 | 0           | 0 | 0           | 0 | 0            | 0 |
| 0 | 0.47647805  | 0 | 0           | 0 | 0.14270496  | 0 | 0            | 0 |
| 0 | 0.4710971   | 0 | 0           | 0 | 0           | 0 | -0.009661092 | 0 |
| 0 | 0.47535068  | 0 | 0.14187993  | 0 | 0           | 0 | 0            | 0 |
| 0 | 0.48498322  | 0 | 0.069399712 | 0 | 0.070227783 | 0 | 0            | 0 |
| 0 | 0           | 0 | 0.072002806 | 0 | 0.090666118 | 0 | 0            | 0 |
| 0 | 0           | 0 | 0           | 0 | 0           | 0 | -0.011328272 | 0 |
| 0 | 0.4853537   | 0 | 0           | 0 | 0.13829162  | 0 | 0            | 0 |
| 0 | 0.45162416  | 0 | 0.070433236 | 0 | 0.06925968  | 0 | 0            | 0 |
| 0 | 0.48382661  | 0 | 0.13776822  | 0 | 0           | 0 | 0            | 0 |
| 0 | 0.45114577  | 0 | 0           | 0 | 0.14364362  | 0 | 0            | 0 |
| 0 | 0.45125092  | 0 | 0.14295649  | 0 | 0           | 0 | 0            | 0 |
| 0 | -0.15392504 | 0 | 0           | 0 | 0           | 0 | 0            | 0 |
| 0 | 0           | 0 | 0           | 0 | 0.16077441  | 0 | 0.006477636  | 0 |
| 0 | 0.44860455  | 0 | 0.13720636  | 0 | 0           | 0 | -0.009470587 | 0 |
| 0 | 0.44846416  | 0 | 0           | 0 | 0.13767966  | 0 | -0.009622458 | 0 |
| 0 | 0.46502753  | 0 | 0           | 0 | 0           | 0 | -0.019081674 | 0 |

|   |             |   |             |   |             |              |              |
|---|-------------|---|-------------|---|-------------|--------------|--------------|
| 0 | -0.12550059 | 0 | 0           | 0 | 0           | 0            | 0            |
| 0 | 0           | 0 | 0           | 0 | 0           | 0            | 0            |
| 0 | 0           | 0 | 0.16015739  | 0 | 0           | 0.007081821  | 0            |
| 0 | -0.15082726 | 0 | 0           | 0 | 0           | -0.005091636 | 0            |
| 0 | 0.44758087  | 0 | 0.070370113 | 0 | 0.05955795  | 0            | -0.014509268 |
| 0 | 0.45751513  | 0 | 0           | 0 | 0           | 0            | 0            |
| 0 | 0.44764265  | 0 | 0.1288304   | 0 | 0           | -0.014121418 | 0            |
| 0 | 0           | 0 | 0.07331719  | 0 | 0.11431731  | 0            | 0            |
| 0 | 0.44748737  | 0 | 0           | 0 | 0.12865256  | 0            | -0.014375113 |
| 0 | 0.45221873  | 0 | 0.070905887 | 0 | 0.058488048 | 0            | 0            |
| 0 | 0           | 0 | 0           | 0 | 0.18581307  | 0            | 0.006275999  |
| 0 | 0           | 0 | 0           | 0 | 0           | 0            | 0            |
| 0 | 0.44455528  | 0 | 0.07742967  | 0 | 0.07648752  | 0            | -0.019002307 |
| 0 | 0           | 0 | 0.07684898  | 0 | 0.090373046 | 0            | 0.003835198  |
| 0 | 0           | 0 | 0           | 0 | 0           | -0.00873896  | 0            |
| 0 | -0.16282797 | 0 | 0           | 0 | 0           | -0.010736638 | 0            |
| 0 | 0.45544458  | 0 | 0           | 0 | 0.15655128  | 0            | -0.021707145 |
| 0 | 0.45450304  | 0 | 0.15558992  | 0 | 0           | -0.021292882 | 0            |
| 0 | 0.4449022   | 0 | 0.15041126  | 0 | 0           | -0.017828957 | 0            |
| 0 | -0.15271074 | 0 | 0           | 0 | 0           | 0            | 0            |
| 0 | 0.44464556  | 0 | 0           | 0 | 0.15116276  | 0            | -0.018155724 |
| 0 | 0           | 0 | 0.18472254  | 0 | 0           | 0.00689721   | 0            |
| 0 | 0           | 0 | 0.068266454 | 0 | 0.092476779 | 0            | 0.01624111   |
| 0 | 0           | 0 | 0.070712158 | 0 | 0.11318306  | 0            | 0.013570439  |
| 0 | 0.47681383  | 0 | 0.14431315  | 0 | 0           | -0.018344606 | 0            |
| 0 | 0.47825387  | 0 | 0           | 0 | 0.14486464  | 0            | -0.018697441 |
| 0 | 0.45059613  | 0 | 0.077941011 | 0 | 0.074259226 | 0            | 0            |
| 0 | 0           | 0 | 0           | 0 | 0           | -0.009998903 | 0            |
| 0 | 0.46762609  | 0 | 0.15089657  | 0 | 0           | 0            | 0            |
| 0 | 0.46864733  | 0 | 0           | 0 | 0.15172928  | 0            | 0            |
| 0 | 0           | 0 | 0.07834078  | 0 | 0.11410332  | 0            | 0.0040352    |
| 0 | 0           | 0 | 0           | 0 | 0.14195217  | 0            | -0.012790593 |
| 0 | 0           | 0 | 0.068026393 | 0 | 0.071497285 | 0            | -0.016008805 |
| 0 | 0.45449606  | 0 | 0.081551609 | 0 | 0.080135854 | 0            | 0            |
| 0 | 0           | 0 | 0.069301001 | 0 | 0.074460162 | 0            | 0            |
| 0 | 0           | 0 | 0.14112759  | 0 | 0           | -0.012512913 | 0            |
| 0 | 0.4836281   | 0 | 0.074712244 | 0 | 0.070866421 | 0            | 0            |
| 0 | 0           | 0 | 0           | 0 | 0.14415646  | 0            | -0.014906024 |
| 0 | 0           | 0 | 0.14341663  | 0 | 0           | -0.014615458 | 0            |
| 0 | -0.13256117 | 0 | 0           | 0 | 0           | 0            | 0            |
| 0 | 0           | 0 | 0.072189592 | 0 | 0.07270017  | 0            | 0            |
| 0 | 0           | 0 | 0           | 0 | 0.13831321  | 0            | -0.015192524 |
| 0 | 0           | 0 | 0           | 0 | 0.1443236   | 0            | 0            |
| 0 | 0           | 0 | 0.13775258  | 0 | 0           | -0.014892676 | 0            |
| 0 | 0           | 0 | 0.1434927   | 0 | 0           | 0            | 0            |
| 0 | 0           | 0 | 0.069606965 | 0 | 0.069558731 | 0            | -0.010089991 |
| 0 | 0           | 0 | 0.068472276 | 0 | 0.070336181 | 0            | 0            |

|   |             |   |             |   |             |              |              |
|---|-------------|---|-------------|---|-------------|--------------|--------------|
| 0 | -0.15674276 | 0 | 0           | 0 | 0           | -0.007900107 | 0            |
| 0 | 0           | 0 | 0           | 0 | 0           | -0.018363893 | 0            |
| 0 | 0.44583693  | 0 | 0.07591897  | 0 | 0.060109571 | 0            | -0.018035896 |
| 0 | -0.13275993 | 0 | 0           | 0 | 0           | -0.009239455 | 0            |
| 0 | 0           | 0 | 0.070191767 | 0 | 0.059537733 | 0            | -0.014666793 |
| 0 | -0.14056887 | 0 | 0.068024474 | 0 | 0.072924775 | 0            | -0.015578112 |
| 0 | -0.14654865 | 0 | 0           | 0 | 0.14311738  | 0            | -0.01262021  |
| 0 | -0.14522434 | 0 | 0.069240166 | 0 | 0.075670581 | 0            | 0            |
| 0 | -0.14765978 | 0 | 0.1422578   | 0 | 0           | -0.012340214 | 0            |
| 0 | 0           | 0 | 0.077149045 | 0 | 0.079463468 | 0            | -0.021151548 |
| 0 | -0.14001574 | 0 | 0           | 0 | 0.13969719  | 0            | -0.014400008 |
| 0 | -0.1414699  | 0 | 0.13909522  | 0 | 0           | -0.014087809 | 0            |
| 0 | -0.14692813 | 0 | 0           | 0 | 0.14472926  | 0            | 0            |
| 0 | 0           | 0 | 0.076475849 | 0 | 0.075610711 | 0            | -0.018194593 |
| 0 | -0.13585406 | 0 | 0.068292183 | 0 | 0.071918584 | 0            | 0            |
| 0 | -0.14805553 | 0 | 0.14387075  | 0 | 0           | 0            | 0            |
| 0 | 0           | 0 | 0           | 0 | 0.15157703  | 0            | -0.018599074 |
| 0 | 0           | 0 | 0.15068834  | 0 | 0           | -0.018242778 | 0            |
| 0 | -0.176869   | 0 | 0           | 0 | 0.14430303  | 0            | -0.014013384 |
| 0 | -0.17667268 | 0 | 0.14356695  | 0 | 0           | -0.013722498 | 0            |
| 0 | -0.17226014 | 0 | 0.072095005 | 0 | 0.072987921 | 0            | 0            |
| 0 | -0.17501311 | 0 | 0.069861237 | 0 | 0.069758129 | 0            | -0.00945328  |
| 0 | 0           | 0 | 0.073292801 | 0 | 0.071869025 | 0            | -0.018693174 |
| 0 | 0           | 0 | 0.076197092 | 0 | 0.076331473 | 0            | 0            |
| 0 | -0.16592257 | 0 | 0           | 0 | 0           | -0.018251161 | 0            |
| 0 | -0.17578523 | 0 | 0.070347692 | 0 | 0.059535532 | 0            | -0.013769689 |
| 0 | -0.16535462 | 0 | 0.077497602 | 0 | 0.080630485 | 0            | -0.021231954 |
| 0 | -0.15617027 | 0 | 0           | 0 | 0.15186506  | 0            | -0.017805193 |
| 0 | -0.15718779 | 0 | 0.15094886  | 0 | 0           | -0.017445198 | 0            |
| 0 | 0.46359143  | 0 | 0.090320098 | 0 | 0.068231037 | 0            | -0.051973618 |
| 0 | -0.17844238 | 0 | 0.076549877 | 0 | 0.075534926 | 0            | -0.017274083 |
| 0 | -0.14277037 | 0 | 0.073082126 | 0 | 0.073297986 | 0            | -0.017888181 |
| 0 | -0.15152637 | 0 | 0.075770965 | 0 | 0.077053838 | 0            | 0            |
| 0 | 0.44533967  | 0 | 0           | 0 | 0           | -0.029711496 | 0            |
| 0 | 0           | 0 | 0.13467018  | 0 | 0           | 0.025470559  | 0            |
| 0 | 0           | 0 | 0           | 0 | 0.13457485  | 0            | 0.02529013   |
| 0 | 0           | 0 | 0.086976249 | 0 | 0.05724305  | 0            | 0.020183879  |
| 0 | 0           | 0 | 0.08873849  | 0 | 0.051775797 | 0            | 0.023241782  |
| 0 | 0.42671723  | 0 | 0           | 0 | 0           | 0            | 0            |
| 0 | 0           | 0 | 0.1424331   | 0 | 0           | 0.020528495  | 0            |
| 0 | 0           | 0 | 0.13930055  | 0 | 0           | 0.022386206  | 0            |
| 0 | 0           | 0 | 0           | 0 | 0.14247853  | 0            | 0.020284703  |
| 0 | 0           | 0 | 0.13635498  | 0 | 0           | 0            | 0            |
| 0 | 0           | 0 | 0           | 0 | 0.13931253  | 0            | 0.022100672  |
| 0 | 0           | 0 | 0.084372638 | 0 | 0.053107162 | 0            | 0            |
| 0 | 0           | 0 | 0           | 0 | 0.1362642   | 0            | 0            |
| 0 | 0           | 0 | 0.085794088 | 0 | 0.057873886 | 0            | 0            |

|   |             |   |             |   |             |   |              |   |
|---|-------------|---|-------------|---|-------------|---|--------------|---|
| 0 | 0           | 0 | 0           | 0 | 0           | 0 | -0.026881364 | 0 |
| 0 | 0           | 0 | 0.086967771 | 0 | 0.054650466 | 0 | 0            | 0 |
| 0 | 0           | 0 | 0           | 0 | 0           | 0 | 0            | 0 |
| 0 | 0.46919115  | 0 | 0           | 0 | 0           | 0 | 0            | 0 |
| 0 | 0           | 0 | 0           | 0 | 0           | 0 | 0.005444472  | 0 |
| 0 | 0.44112149  | 0 | 0           | 0 | 0           | 0 | 0            | 0 |
| 0 | -0.19386341 | 0 | 0           | 0 | 0           | 0 | -0.026834644 | 0 |
| 0 | 0           | 0 | 0.097652536 | 0 | 0.062744931 | 0 | 0.012255098  | 0 |
| 0 | 0.44131637  | 0 | 0           | 0 | 0           | 0 | -0.001130718 | 0 |
| 0 | 0.44227704  | 0 | 0           | 0 | 0           | 0 | 0            | 0 |
| 0 | 0           | 0 | 0           | 0 | 0           | 0 | -0.003842144 | 0 |
| 0 | 0           | 0 | 0           | 0 | 0           | 0 | 0            | 0 |
| 0 | 0           | 0 | 0           | 0 | 0           | 0 | -0.004461577 | 0 |
| 0 | 0           | 0 | 0           | 0 | 0           | 0 | 0.002574262  | 0 |
| 0 | 0.42533926  | 0 | 0           | 0 | 0           | 0 | 0            | 0 |
| 0 | 0.4373248   | 0 | 0           | 0 | 0           | 0 | -0.00368837  | 0 |
| 0 | 0           | 0 | 0           | 0 | 0           | 0 | 0            | 0 |
| 0 | -0.15289472 | 0 | 0           | 0 | 0           | 0 | -0.003568239 | 0 |
| 0 | -0.152431   | 0 | 0           | 0 | 0           | 0 | 0            | 0 |
| 0 | 0.4611647   | 0 | 0           | 0 | 0           | 0 | 0            | 0 |
| 0 | 0.39368999  | 0 | 0           | 0 | 0           | 0 | -0.04401833  | 0 |
| 0 | 0.41340513  | 0 | 0           | 0 | 0           | 0 | 0            | 0 |
| 0 | 0.43684848  | 0 | 0           | 0 | 0           | 0 | -0.008731892 | 0 |
| 0 | -0.18356579 | 0 | 0           | 0 | 0           | 0 | -0.003573429 | 0 |
| 0 | 0.40360521  | 0 | 0           | 0 | 0           | 0 | 0            | 0 |
| 0 | 0           | 0 | 0           | 0 | 0           | 0 | -0.003961585 | 0 |
| 0 | 0.40682068  | 0 | 0           | 0 | 0           | 0 | -0.000258795 | 0 |
| 0 | 0.4351631   | 0 | 0           | 0 | 0           | 0 | -0.017459184 | 0 |
| 0 | 0.44520238  | 0 | 0           | 0 | 0           | 0 | 0.008609389  | 0 |
| 0 | -0.21088975 | 0 | 0           | 0 | 0           | 0 | 0            | 0 |
| 0 | 0           | 0 | 0           | 0 | 0           | 0 | -0.004042659 | 0 |
| 0 | 0.42886921  | 0 | 0           | 0 | 0           | 0 | 0.008043843  | 0 |
| 0 | 0           | 0 | 0           | 0 | 0           | 0 | -0.009121082 | 0 |
| 0 | 0           | 0 | 0           | 0 | 0           | 0 | 0.008524698  | 0 |
| 0 | 0.43826632  | 0 | 0           | 0 | 0           | 0 | -0.0083112   | 0 |
| 0 | 0           | 0 | 0.062974254 | 0 | 0.089345746 | 0 | 0            | 0 |
| 0 | -0.18207398 | 0 | 0           | 0 | 0           | 0 | -0.003081701 | 0 |
| 0 | 0           | 0 | 0           | 0 | 0.15125807  | 0 | -0.001885046 | 0 |
| 0 | 0           | 0 | 0           | 0 | 0           | 0 | -0.00806356  | 0 |
| 0 | 0           | 0 | 0.14995271  | 0 | 0           | 0 | -0.001441264 | 0 |
| 0 | 0           | 0 | 0.16745278  | 0 | 0           | 0 | 0.028676874  | 0 |
| 0 | 0           | 0 | 0           | 0 | 0.16776183  | 0 | 0.028314907  | 0 |
| 0 | 0.41737659  | 0 | 0           | 0 | 0           | 0 | -0.008320768 | 0 |
| 0 | 0           | 0 | 0           | 0 | 0           | 0 | -0.004419429 | 0 |
| 0 | -0.19689294 | 0 | 0           | 0 | 0           | 0 | -0.003141211 | 0 |
| 0 | 0           | 0 | 0.091517754 | 0 | 0.082623061 | 0 | 0.026194168  | 0 |
| 0 | 0           | 0 | 0.081605271 | 0 | 0.093653848 | 0 | 0.026189944  | 0 |

|   |             |   |             |   |             |   |              |   |
|---|-------------|---|-------------|---|-------------|---|--------------|---|
| 0 | 0           | 0 | 0.066448852 | 0 | 0.096139538 | 0 | -0.007445305 | 0 |
| 0 | -0.16129849 | 0 | 0           | 0 | 0           | 0 | -0.008329257 | 0 |
| 0 | 0.39301093  | 0 | 0           | 0 | 0           | 0 | 0            | 0 |
| 0 | 0           | 0 | 0.06548176  | 0 | 0.10147405  | 0 | 0.000595267  | 0 |
| 0 | -0.20545183 | 0 | 0           | 0 | 0           | 0 | 0.0090207    | 0 |
| 0 | 0           | 0 | 0.086655054 | 0 | 0.085009061 | 0 | 0            | 0 |
| 0 | -0.21963397 | 0 | 0           | 0 | 0           | 0 | -0.007169108 | 0 |
| 0 | 0           | 0 | 0.082765365 | 0 | 0.084227497 | 0 | 0.038355306  | 0 |
| 0 | 0.39757547  | 0 | 0           | 0 | 0           | 0 | 0.00184049   | 0 |
| 0 | 0           | 0 | 0.069340253 | 0 | 0.091291146 | 0 | -0.005445064 | 0 |
| 0 | 0           | 0 | 0           | 0 | 0           | 0 | -0.006823191 | 0 |
| 0 | 0.38225304  | 0 | 0           | 0 | 0           | 0 | -0.011091806 | 0 |
| 0 | -0.23004759 | 0 | 0           | 0 | 0           | 0 | -0.005944657 | 0 |
| 0 | 0.44831852  | 0 | 0           | 0 | 0           | 0 | -0.007503235 | 0 |
| 0 | 0           | 0 | 0           | 0 | 0           | 0 | 0.009388026  | 0 |
| 0 | 0.44098248  | 0 | 0           | 0 | 0           | 0 | -0.010471188 | 0 |
| 0 | 0.4570226   | 0 | 0           | 0 | 0           | 0 | 0            | 0 |
| 0 | 0.43235065  | 0 | 0           | 0 | 0           | 0 | -0.017990869 | 0 |
| 0 | 0.42001993  | 0 | 0           | 0 | 0           | 0 | -0.00993054  | 0 |
| 0 | 0           | 0 | 0           | 0 | 0           | 0 | -0.010933694 | 0 |
| 0 | 0           | 0 | 0           | 0 | 0           | 0 | 0.029371168  | 0 |
| 0 | 0           | 0 | 0.14234718  | 0 | 0           | 0 | 0.034185272  | 0 |
| 0 | -0.16582507 | 0 | 0           | 0 | 0           | 0 | -0.010134768 | 0 |
| 0 | 0           | 0 | 0           | 0 | 0.14237748  | 0 | 0.03393797   | 0 |
| 0 | 0           | 0 | 0.086026577 | 0 | 0.047809923 | 0 | 0.03405938   | 0 |
| 0 | 0           | 0 | 0.083124225 | 0 | 0.05057569  | 0 | 0.040850718  | 0 |
| 0 | 0           | 0 | 0.092541854 | 0 | 0.057904855 | 0 | 0.031216051  | 0 |
| 0 | 0.44413073  | 0 | 0           | 0 | 0           | 0 | -0.016504353 | 0 |
| 0 | 0           | 0 | 0.086032128 | 0 | 0.060028056 | 0 | 0            | 0 |
| 0 | 0           | 0 | 0           | 0 | 0           | 0 | 0.021309952  | 0 |
| 0 | 0           | 0 | 0.080872625 | 0 | 0.071757541 | 0 | 0.027594303  | 0 |
| 0 | 0.47504751  | 0 | 0.12924849  | 0 | 0           | 0 | 0            | 0 |
| 0 | 0.49646415  | 0 | 0.13637573  | 0 | 0           | 0 | 0            | 0 |
| 0 | 0.4748477   | 0 | 0           | 0 | 0.12936452  | 0 | 0            | 0 |
| 0 | 0.4973741   | 0 | 0           | 0 | 0.13678009  | 0 | 0            | 0 |
| 0 | 0.47498241  | 0 | 0.13248069  | 0 | 0           | 0 | -0.010182226 | 0 |
| 0 | 0.4780965   | 0 | 0.077362229 | 0 | 0.057436598 | 0 | 0            | 0 |
| 0 | 0.47841116  | 0 | 0.13105461  | 0 | 0           | 0 | 0            | 0 |
| 0 | 0.47473437  | 0 | 0           | 0 | 0.13257471  | 0 | -0.010347775 | 0 |
| 0 | 0.4782239   | 0 | 0           | 0 | 0.13123633  | 0 | 0            | 0 |
| 0 | 0.4695008   | 0 | 0.13730258  | 0 | 0           | 0 | -0.012263688 | 0 |
| 0 | 0.48841222  | 0 | 0.14254942  | 0 | 0           | 0 | 0            | 0 |
| 0 | 0.4726287   | 0 | 0.083994845 | 0 | 0.0566065   | 0 | 0            | 0 |
| 0 | 0.47435087  | 0 | 0.13468274  | 0 | 0           | 0 | 0            | 0 |
| 0 | 0.50332591  | 0 | 0.13626989  | 0 | 0           | 0 | 0            | 0 |
| 0 | 0.46924972  | 0 | 0           | 0 | 0.13760922  | 0 | -0.012653287 | 0 |
| 0 | 0.48877355  | 0 | 0           | 0 | 0.14312312  | 0 | 0            | 0 |

|   |             |   |             |   |             |   |              |   |
|---|-------------|---|-------------|---|-------------|---|--------------|---|
| 0 | 0.50434073  | 0 | 0           | 0 | 0.13665584  | 0 | 0            | 0 |
| 0 | 0.47423266  | 0 | 0           | 0 | 0.13484696  | 0 | 0            | 0 |
| 0 | 0.47479437  | 0 | 0.1355238   | 0 | 0           | 0 | -0.011540817 | 0 |
| 0 | 0.47853474  | 0 | 0.080575877 | 0 | 0.056343533 | 0 | 0            | 0 |
| 0 | 0.47446648  | 0 | 0           | 0 | 0.13578444  | 0 | -0.011862587 | 0 |
| 0 | 0.47121833  | 0 | 0.083867887 | 0 | 0.06406638  | 0 | -0.019092573 | 0 |
| 0 | 0.47762073  | 0 | 0.14865854  | 0 | 0           | 0 | -0.02057854  | 0 |
| 0 | 0.47825156  | 0 | 0           | 0 | 0.14926743  | 0 | -0.021023006 | 0 |
| 0 | 0           | 0 | 0.13217271  | 0 | 0           | 0 | 0            | 0 |
| 0 | 0           | 0 | 0           | 0 | 0.13250791  | 0 | 0            | 0 |
| 0 | 0.4773138   | 0 | 0.087792754 | 0 | 0.066553383 | 0 | 0            | 0 |
| 0 | 0           | 0 | 0.077695553 | 0 | 0.0531045   | 0 | 0            | 0 |
| 0 | 0           | 0 | 0.12914222  | 0 | 0           | 0 | -0.007716961 | 0 |
| 0 | 0           | 0 | 0.13042961  | 0 | 0           | 0 | 0            | 0 |
| 0 | 0           | 0 | 0.13174744  | 0 | 0           | 0 | 0            | 0 |
| 0 | 0           | 0 | 0.13563481  | 0 | 0           | 0 | -0.012674077 | 0 |
| 0 | 0           | 0 | 0.076120244 | 0 | 0.061863668 | 0 | 0            | 0 |
| 0 | 0           | 0 | 0           | 0 | 0.12926826  | 0 | -0.007983404 | 0 |
| 0 | 0           | 0 | 0           | 0 | 0.136045    | 0 | -0.012950935 | 0 |
| 0 | 0           | 0 | 0           | 0 | 0.13211416  | 0 | 0            | 0 |
| 0 | 0           | 0 | 0.076559114 | 0 | 0.057632788 | 0 | -0.010768726 | 0 |
| 0 | 0           | 0 | 0.14019015  | 0 | 0           | 0 | -0.014316509 | 0 |
| 0 | 0           | 0 | 0.13522329  | 0 | 0           | 0 | 0            | 0 |
| 0 | 0           | 0 | 0           | 0 | 0.13055317  | 0 | 0            | 0 |
| 0 | 0           | 0 | 0.076672262 | 0 | 0.055916828 | 0 | 0            | 0 |
| 0 | 0           | 0 | 0.13137148  | 0 | 0           | 0 | -0.009736866 | 0 |
| 0 | 0           | 0 | 0.081687371 | 0 | 0.056551481 | 0 | -0.012360435 | 0 |
| 0 | 0           | 0 | 0.083677326 | 0 | 0.059739049 | 0 | 0            | 0 |
| 0 | 0           | 0 | 0           | 0 | 0.13558096  | 0 | 0            | 0 |
| 0 | 0           | 0 | 0           | 0 | 0.14075013  | 0 | -0.014807802 | 0 |
| 0 | 0           | 0 | 0           | 0 | 0.13159905  | 0 | -0.010007541 | 0 |
| 0 | -0.12024557 | 0 | 0.13305595  | 0 | 0           | 0 | 0            | 0 |
| 0 | 0           | 0 | 0.13453103  | 0 | 0           | 0 | -0.010816869 | 0 |
| 0 | 0           | 0 | 0.081374374 | 0 | 0.054495277 | 0 | 0            | 0 |
| 0 | 0           | 0 | 0.13605486  | 0 | 0           | 0 | -0.01201466  | 0 |
| 0 | 0           | 0 | 0.078301852 | 0 | 0.059227233 | 0 | 0            | 0 |
| 0 | -0.11943009 | 0 | 0           | 0 | 0.13344449  | 0 | 0            | 0 |
| 0 | 0           | 0 | 0           | 0 | 0.13648686  | 0 | -0.012355995 | 0 |
| 0 | 0           | 0 | 0           | 0 | 0.13474509  | 0 | -0.011159278 | 0 |
| 0 | 0.46296193  | 0 | 0.14893612  | 0 | 0           | 0 | 0            | 0 |
| 0 | 0           | 0 | 0.079565622 | 0 | 0.057222947 | 0 | -0.011852139 | 0 |
| 0 | 0.46308855  | 0 | 0           | 0 | 0.14914731  | 0 | 0            | 0 |
| 0 | -0.11451396 | 0 | 0.13202171  | 0 | 0           | 0 | 0            | 0 |
| 0 | -0.12656145 | 0 | 0.1366803   | 0 | 0           | 0 | -0.012495952 | 0 |
| 0 | -0.11360465 | 0 | 0           | 0 | 0.13240219  | 0 | 0            | 0 |
| 0 | -0.14846105 | 0 | 0.077622149 | 0 | 0.053648248 | 0 | 0            | 0 |
| 0 | -0.12431364 | 0 | 0.076439224 | 0 | 0.062587294 | 0 | 0            | 0 |

|   |             |   |             |   |             |              |              |
|---|-------------|---|-------------|---|-------------|--------------|--------------|
| 0 | -0.11842746 | 0 | 0.13533554  | 0 | 0           | 0            | 0            |
| 0 | -0.15049042 | 0 | 0.12957767  | 0 | 0           | -0.007133584 | 0            |
| 0 | 0           | 0 | 0.083540613 | 0 | 0.065902227 | 0            | -0.020431948 |
| 0 | -0.12566583 | 0 | 0           | 0 | 0.13711466  | 0            | -0.012773804 |
| 0 | 0.46320161  | 0 | 0.083080456 | 0 | 0.071863833 | 0            | 0            |
| 0 | -0.14893016 | 0 | 0.13055446  | 0 | 0           | 0            | 0            |
| 0 | -0.13314746 | 0 | 0.14132211  | 0 | 0           | -0.014185543 | 0            |
| 0 | -0.11780136 | 0 | 0           | 0 | 0.13579146  | 0            | 0            |
| 0 | 0.45950675  | 0 | 0.15353196  | 0 | 0           | -0.010813722 | 0            |
| 0 | -0.15067577 | 0 | 0           | 0 | 0.12970294  | 0            | -0.007404568 |
| 0 | -0.14850984 | 0 | 0.076861689 | 0 | 0.057738726 | 0            | -0.010153931 |
| 0 | 0.45941291  | 0 | 0           | 0 | 0.15381626  | 0            | -0.011178113 |
| 0 | -0.14904357 | 0 | 0           | 0 | 0.1306829   | 0            | 0            |
| 0 | -0.13178112 | 0 | 0.083828354 | 0 | 0.060730085 | 0            | 0            |
| 0 | -0.1326587  | 0 | 0           | 0 | 0.14190447  | 0            | -0.014676343 |
| 0 | -0.11981132 | 0 | 0.13623728  | 0 | 0           | -0.011243474 | 0            |
| 0 | -0.14498273 | 0 | 0.076849126 | 0 | 0.055838906 | 0            | 0            |
| 0 | -0.11595496 | 0 | 0.07786788  | 0 | 0.059875672 | 0            | 0            |
| 0 | 0.46079643  | 0 | 0.15290565  | 0 | 0           | 0            | 0            |
| 0 | -0.14786828 | 0 | 0.13143889  | 0 | 0           | -0.008874959 | 0            |
| 0 | -0.15365499 | 0 | 0.082076799 | 0 | 0.05652883  | 0            | -0.011761377 |
| 0 | -0.11903948 | 0 | 0           | 0 | 0.13669342  | 0            | -0.011586201 |
| 0 | 0.46223726  | 0 | 0           | 0 | 0.15339013  | 0            | 0            |
| 0 | -0.14897733 | 0 | 0.081844076 | 0 | 0.054021443 | 0            | 0            |
| 0 | -0.15209108 | 0 | 0.13449322  | 0 | 0           | -0.009947638 | 0            |
| 0 | -0.14816912 | 0 | 0           | 0 | 0.13165824  | 0            | -0.009146282 |
| 0 | -0.15232021 | 0 | 0           | 0 | 0.13470474  | 0            | -0.010290194 |
| 0 | -0.14852026 | 0 | 0.079601823 | 0 | 0.057123018 | 0            | -0.010958007 |
| 0 | -0.14249839 | 0 | 0.083795799 | 0 | 0.067087984 | 0            | -0.020512139 |
| 0 | 0           | 0 | 0.079204775 | 0 | 0.071202108 | 0            | 0            |
| 0 | 0           | 0 | 0.14914192  | 0 | 0           | -0.00899696  | 0            |
| 0 | 0.46905296  | 0 | 0.076881636 | 0 | 0.083962383 | 0            | 0            |
| 0 | 0           | 0 | 0           | 0 | 0.14938781  | 0            | -0.009322416 |
| 0 | 0           | 0 | 0.14839505  | 0 | 0           | 0            | 0            |
| 0 | 0.46520296  | 0 | 0           | 0 | 0.15974293  | 0            | -0.011343365 |
| 0 | 0.45597849  | 0 | 0           | 0 | 0.15633482  | 0            | 0            |
| 0 | 0.45426173  | 0 | 0.15577816  | 0 | 0           | 0            | 0            |
| 0 | 0           | 0 | 0           | 0 | 0.14883668  | 0            | 0            |
| 0 | 0.46528251  | 0 | 0.159444    | 0 | 0           | -0.011047308 | 0            |
| 0 | 0           | 0 | 0.082091138 | 0 | 0.072631531 | 0            | -0.011183091 |
| 0 | 0           | 0 | 0.083012187 | 0 | 0.070958183 | 0            | 0            |
| 0 | 0.46467315  | 0 | 0.080087305 | 0 | 0.085575734 | 0            | -0.013511787 |
| 0 | 0           | 0 | 0.1524326   | 0 | 0           | -0.010932938 | 0            |
| 0 | 0.45396957  | 0 | 0.082154277 | 0 | 0.079677784 | 0            | 0            |
| 0 | 0           | 0 | 0           | 0 | 0.15295414  | 0            | -0.011334004 |
| 0 | 0.44884046  | 0 | 0.16011113  | 0 | 0           | -0.012856021 | 0            |
| 0 | 0.45043855  | 0 | 0           | 0 | 0.16073554  | 0            | -0.013236654 |

|   |             |   |             |   |             |   |              |   |
|---|-------------|---|-------------|---|-------------|---|--------------|---|
| 0 | 0.4630444   | 0 | 0.072280001 | 0 | 0.076207198 | 0 | 0            | 0 |
| 0 | -0.16018124 | 0 | 0.079323437 | 0 | 0.071534533 | 0 | 0            | 0 |
| 0 | 0.46634992  | 0 | 0.068593539 | 0 | 0.075777633 | 0 | 0.01050723   | 0 |
| 0 | 0.46456722  | 0 | 0           | 0 | 0.14706004  | 0 | 0.00527466   | 0 |
| 0 | 0.46456656  | 0 | 0.14659701  | 0 | 0           | 0 | 0.005771401  | 0 |
| 0 | 0.46688492  | 0 | 0           | 0 | 0.14793557  | 0 | 0            | 0 |
| 0 | 0.46538165  | 0 | 0.14719907  | 0 | 0           | 0 | 0            | 0 |
| 0 | -0.16303132 | 0 | 0.14954459  | 0 | 0           | 0 | -0.008145482 | 0 |
| 0 | 0.4696031   | 0 | 0.065289002 | 0 | 0.079061065 | 0 | 0            | 0 |
| 0 | -0.16300196 | 0 | 0           | 0 | 0.14980512  | 0 | -0.008485973 | 0 |
| 0 | 0.47142366  | 0 | 0           | 0 | 0.14458556  | 0 | 0.00966678   | 0 |
| 0 | -0.1585478  | 0 | 0.1495594   | 0 | 0           | 0 | 0            | 0 |
| 0 | 0.47034077  | 0 | 0.14349076  | 0 | 0           | 0 | 0.010571707  | 0 |
| 0 | -0.15706758 | 0 | 0           | 0 | 0.15003768  | 0 | 0            | 0 |
| 0 | -0.16349879 | 0 | 0.082146829 | 0 | 0.072839649 | 0 | -0.010295919 | 0 |
| 0 | -0.15893169 | 0 | 0.082692009 | 0 | 0.072331816 | 0 | 0            | 0 |
| 0 | -0.16307742 | 0 | 0.15341219  | 0 | 0           | 0 | -0.010098946 | 0 |
| 0 | -0.16182741 | 0 | 0           | 0 | 0.15398776  | 0 | -0.010524465 | 0 |
| 0 | 0.4606867   | 0 | 0.07259627  | 0 | 0.081658021 | 0 | 0            | 0 |
| 0 | 0.46749855  | 0 | 0.072179086 | 0 | 0.083759884 | 0 | 0.001301491  | 0 |
| 0 | 0.46319264  | 0 | 0.070574382 | 0 | 0.081606727 | 0 | 0.004383721  | 0 |
| 0 | 0           | 0 | 0.078181391 | 0 | 0.078979712 | 0 | 0            | 0 |
| 0 | 0           | 0 | 0.076325281 | 0 | 0.084698459 | 0 | -0.011581775 | 0 |
| 0 | 0.46096306  | 0 | 0           | 0 | 0.15306088  | 0 | 0.001457157  | 0 |
| 0 | 0           | 0 | 0           | 0 | 0.15622243  | 0 | -0.011365582 | 0 |
| 0 | 0           | 0 | 0.15564039  | 0 | 0           | 0 | -0.011040227 | 0 |
| 0 | 0.45960889  | 0 | 0.15231311  | 0 | 0           | 0 | 0.001965024  | 0 |
| 0 | 0           | 0 | 0.081075982 | 0 | 0.080159001 | 0 | -0.013214928 | 0 |
| 0 | 0           | 0 | 0.072837491 | 0 | 0.075421905 | 0 | 0.004863819  | 0 |
| 0 | 0           | 0 | 0.072231016 | 0 | 0.076546204 | 0 | 0            | 0 |
| 0 | 0           | 0 | 0.068045964 | 0 | 0.076688509 | 0 | 0.010120085  | 0 |
| 0 | 0           | 0 | 0           | 0 | 0.14738374  | 0 | 0.004600522  | 0 |
| 0 | 0           | 0 | 0.14670948  | 0 | 0           | 0 | 0.005117708  | 0 |
| 0 | -0.15788457 | 0 | 0.07648884  | 0 | 0.084849505 | 0 | -0.010719085 | 0 |
| 0 | -0.16532914 | 0 | 0.078023188 | 0 | 0.080450325 | 0 | 0            | 0 |
| 0 | -0.16816067 | 0 | 0           | 0 | 0.15751445  | 0 | -0.010586706 | 0 |
| 0 | -0.16980922 | 0 | 0.15688197  | 0 | 0           | 0 | -0.010257566 | 0 |
| 0 | 0           | 0 | 0.13536813  | 0 | 0           | 0 | 0            | 0 |
| 0 | 0           | 0 | 0           | 0 | 0.13601447  | 0 | 0            | 0 |
| 0 | 0           | 0 | 0.069269382 | 0 | 0.068413061 | 0 | 0            | 0 |
| 0 | -0.17051085 | 0 | 0.080801894 | 0 | 0.081585146 | 0 | -0.012407548 | 0 |
| 0 | 0           | 0 | 0.13568602  | 0 | 0           | 0 | 0.000616856  | 0 |
| 0 | 0.48427527  | 0 | 0.13367548  | 0 | 0           | 0 | 0            | 0 |
| 0 | 0           | 0 | 0           | 0 | 0.13638403  | 0 | 0.000225595  | 0 |
| 0 | 0           | 0 | 0.072866434 | 0 | 0.081042852 | 0 | 0.00110926   | 0 |
| 0 | 0.48563972  | 0 | 0           | 0 | 0.13386087  | 0 | 0            | 0 |
| 0 | -0.15873676 | 0 | 0.073115204 | 0 | 0.075575094 | 0 | 0.005417764  | 0 |



|   |             |   |             |   |             |   |              |   |
|---|-------------|---|-------------|---|-------------|---|--------------|---|
| 0 | -0.15482545 | 0 | 0.071125134 | 0 | 0.078727103 | 0 | 0            | 0 |
| 0 | 0           | 0 | 0.074270722 | 0 | 0.067662934 | 0 | 0            | 0 |
| 0 | -0.14948615 | 0 | 0.068066639 | 0 | 0.077870328 | 0 | 0.010523257  | 0 |
| 0 | -0.15306322 | 0 | 0           | 0 | 0.14851071  | 0 | 0.00507608   | 0 |
| 0 | -0.15441175 | 0 | 0.14776529  | 0 | 0           | 0 | 0.005607999  | 0 |
| 0 | 0           | 0 | 0.14001655  | 0 | 0           | 0 | -0.000754845 | 0 |
| 0 | 0           | 0 | 0.07344758  | 0 | 0.068954712 | 0 | -0.001848454 | 0 |
| 0 | 0           | 0 | 0           | 0 | 0.14069917  | 0 | -0.001209813 | 0 |
| 0 | 0.44793156  | 0 | 0.13457778  | 0 | 0           | 0 | 0            | 0 |
| 0 | 0           | 0 | 0.074399565 | 0 | 0.07283718  | 0 | 0            | 0 |
| 0 | 0.44785957  | 0 | 0           | 0 | 0.13477642  | 0 | 0            | 0 |
| 0 | 0           | 0 | 0.14526845  | 0 | 0           | 0 | -0.003468076 | 0 |
| 0 | 0           | 0 | 0           | 0 | 0.14597696  | 0 | -0.003880401 | 0 |
| 0 | 0.47974422  | 0 | 0.13856559  | 0 | 0           | 0 | -0.011257163 | 0 |
| 0 | 0.48428804  | 0 | 0.08017273  | 0 | 0.059537771 | 0 | 0            | 0 |
| 0 | 0.47752215  | 0 | 0.14098663  | 0 | 0           | 0 | 0            | 0 |
| 0 | -0.16052163 | 0 | 0.072842589 | 0 | 0.082378314 | 0 | 0.001461191  | 0 |
| 0 | 0.48099693  | 0 | 0           | 0 | 0.13878893  | 0 | -0.011631632 | 0 |
| 0 | 0.44850625  | 0 | 0.077818571 | 0 | 0.046154391 | 0 | 0            | 0 |
| 0 | 0.44597008  | 0 | 0.12340924  | 0 | 0           | 0 | -0.008034673 | 0 |
| 0 | 0.47851272  | 0 | 0           | 0 | 0.14140057  | 0 | 0            | 0 |
| 0 | 0.44581539  | 0 | 0           | 0 | 0.12290248  | 0 | -0.008300656 | 0 |
| 0 | 0.49984521  | 0 | 0.12599108  | 0 | 0           | 0 | 0            | 0 |
| 0 | 0.50079517  | 0 | 0           | 0 | 0.12645047  | 0 | 0            | 0 |
| 0 | 0.44393668  | 0 | 0.14013645  | 0 | 0           | 0 | -0.010859719 | 0 |
| 0 | 0.44742474  | 0 | 0.083347051 | 0 | 0.058218136 | 0 | 0            | 0 |
| 0 | 0.49397557  | 0 | 0.074188067 | 0 | 0.058954802 | 0 | 0            | 0 |
| 0 | 0.4437207   | 0 | 0           | 0 | 0.14040908  | 0 | -0.011216113 | 0 |
| 0 | 0.49314233  | 0 | 0.13106644  | 0 | 0           | 0 | -0.003825333 | 0 |
| 0 | 0.49366884  | 0 | 0           | 0 | 0.13170205  | 0 | -0.004305779 | 0 |
| 0 | 0.48722617  | 0 | 0.070157882 | 0 | 0.065017558 | 0 | 0.003071982  | 0 |
| 0 | 0           | 0 | 0.074375903 | 0 | 0.079288377 | 0 | -0.00836028  | 0 |
| 0 | 0.48646016  | 0 | 0.069298452 | 0 | 0.065682509 | 0 | 0            | 0 |
| 0 | 0           | 0 | 0.075176514 | 0 | 0.059326055 | 0 | 0            | 0 |
| 0 | 0           | 0 | 0.13344752  | 0 | 0           | 0 | -0.008771614 | 0 |
| 0 | 0.44465465  | 0 | 0.081945048 | 0 | 0.046945406 | 0 | -0.01093335  | 0 |
| 0 | 0           | 0 | 0.13533522  | 0 | 0           | 0 | 0            | 0 |
| 0 | 0           | 0 | 0           | 0 | 0.13366029  | 0 | -0.009093214 | 0 |
| 0 | 0.48630856  | 0 | 0.13326067  | 0 | 0           | 0 | 0.00395777   | 0 |
| 0 | 0.4875992   | 0 | 0           | 0 | 0.13368192  | 0 | 0.003465008  | 0 |
| 0 | 0           | 0 | 0           | 0 | 0.13572525  | 0 | 0            | 0 |
| 0 | 0           | 0 | 0.078545485 | 0 | 0.057594619 | 0 | 0            | 0 |
| 0 | 0           | 0 | 0.13484956  | 0 | 0           | 0 | -0.008552601 | 0 |
| 0 | 0           | 0 | 0           | 0 | 0.13508706  | 0 | -0.008859863 | 0 |
| 0 | 0           | 0 | 0.079125134 | 0 | 0.060061165 | 0 | -0.011597199 | 0 |
| 0 | 0           | 0 | 0.14076244  | 0 | 0           | 0 | -0.011351416 | 0 |
| 0 | 0           | 0 | 0.080644919 | 0 | 0.061649162 | 0 | 0            | 0 |

|   |             |   |             |   |             |   |              |   |
|---|-------------|---|-------------|---|-------------|---|--------------|---|
| 0 | -0.13563593 | 0 | 0.07500779  | 0 | 0.06087475  | 0 | 0            | 0 |
| 0 | -0.13923751 | 0 | 0.13475932  | 0 | 0           | 0 | -0.007966981 | 0 |
| 0 | 0           | 0 | 0           | 0 | 0.1412402   | 0 | -0.011737982 | 0 |
| 0 | 0           | 0 | 0.07716497  | 0 | 0.046938629 | 0 | -0.008542995 | 0 |
| 0 | -0.13935282 | 0 | 0.13567954  | 0 | 0           | 0 | 0            | 0 |
| 0 | -0.13795089 | 0 | 0           | 0 | 0.13501154  | 0 | -0.008296902 | 0 |
| 0 | -0.13833233 | 0 | 0           | 0 | 0.13609819  | 0 | 0            | 0 |
| 0 | 0           | 0 | 0.082317174 | 0 | 0.059122169 | 0 | -0.011214085 | 0 |
| 0 | 0.44942987  | 0 | 0.072265665 | 0 | 0.048730541 | 0 | 0            | 0 |
| 0 | 0.44991767  | 0 | 0.073443147 | 0 | 0.049163344 | 0 | 0.002328863  | 0 |
| 0 | 0.45056049  | 0 | 0.072333401 | 0 | 0.051266114 | 0 | 0.004127641  | 0 |
| 0 | 0.45030528  | 0 | 0.11988423  | 0 | 0           | 0 | 0.003284479  | 0 |
| 0 | 0           | 0 | 0.069715635 | 0 | 0.05784711  | 0 | 0            | 0 |
| 0 | 0           | 0 | 0.086687456 | 0 | 0.079534193 | 0 | -0.012679893 | 0 |
| 0 | 0.45010198  | 0 | 0           | 0 | 0.11993372  | 0 | 0.003016484  | 0 |
| 0 | 0           | 0 | 0.12591301  | 0 | 0           | 0 | -0.001001841 | 0 |
| 0 | 0           | 0 | 0.073071044 | 0 | 0.058803073 | 0 | -0.003834028 | 0 |
| 0 | 0           | 0 | 0           | 0 | 0.12636586  | 0 | -0.001340196 | 0 |
| 0 | -0.14009297 | 0 | 0.079446929 | 0 | 0.060921051 | 0 | -0.010802991 | 0 |
| 0 | -0.17555155 | 0 | 0.078672755 | 0 | 0.057652679 | 0 | 0            | 0 |
| 0 | -0.17803316 | 0 | 0.13499664  | 0 | 0           | 0 | -0.007667369 | 0 |
| 0 | -0.14180702 | 0 | 0.08022593  | 0 | 0.062339594 | 0 | 0            | 0 |
| 0 | -0.14547361 | 0 | 0.14100063  | 0 | 0           | 0 | -0.010552285 | 0 |
| 0 | 0           | 0 | 0.06984514  | 0 | 0.0644427   | 0 | 0.003030618  | 0 |
| 0 | -0.17822067 | 0 | 0           | 0 | 0.13523826  | 0 | -0.007975269 | 0 |
| 0 | -0.14458967 | 0 | 0           | 0 | 0.14148646  | 0 | -0.010929235 | 0 |
| 0 | -0.12080967 | 0 | 0.069814593 | 0 | 0.058625191 | 0 | 0            | 0 |
| 0 | -0.12165677 | 0 | 0.12679557  | 0 | 0           | 0 | -0.000709273 | 0 |
| 0 | -0.17738911 | 0 | 0.077431994 | 0 | 0.046817255 | 0 | -0.007647889 | 0 |
| 0 | -0.12703062 | 0 | 0.07324096  | 0 | 0.059805385 | 0 | -0.003718275 | 0 |
| 0 | -0.12086598 | 0 | 0           | 0 | 0.12727263  | 0 | -0.001048411 | 0 |
| 0 | -0.17937697 | 0 | 0.082310276 | 0 | 0.059128032 | 0 | -0.010290538 | 0 |
| 0 | -0.13383655 | 0 | 0.069765293 | 0 | 0.065809295 | 0 | 0.00354112   | 0 |
| 0 | 0           | 0 | 0.072591361 | 0 | 0.048758273 | 0 | 0.002695011  | 0 |
| 0 | -0.17327039 | 0 | 0.072806114 | 0 | 0.048940602 | 0 | 0.003343369  | 0 |
| 0 | 0.46935327  | 0 | 0           | 0 | 0           | 0 | 0            | 0 |
| 0 | 0           | 0 | 0.07475284  | 0 | 0.10167459  | 0 | 0            | 0 |
| 0 | 0.49449521  | 0 | 0           | 0 | 0           | 0 | 0            | 0 |
| 0 | 0           | 0 | 0           | 0 | 0.17437986  | 0 | 0.007912639  | 0 |
| 0 | 0.4724169   | 0 | 0           | 0 | 0           | 0 | -0.005612553 | 0 |
| 0 | 0           | 0 | 0.17341075  | 0 | 0           | 0 | 0.008553274  | 0 |
| 0 | 0.46067899  | 0 | 0           | 0 | 0           | 0 | -0.010831541 | 0 |
| 0 | 0           | 0 | 0.079587065 | 0 | 0.10126306  | 0 | 0.005759648  | 0 |
| 0 | 0.4686789   | 0 | 0           | 0 | 0           | 0 | 0            | 0 |
| 0 | 0           | 0 | 0.068930426 | 0 | 0.074187151 | 0 | 0            | 0 |
| 0 | 0           | 0 | 0.068476902 | 0 | 0.072592215 | 0 | 0.004745897  | 0 |
| 0 | 0           | 0 | 0           | 0 | 0.14162496  | 0 | 0.003576496  | 0 |

|   |             |   |             |   |             |   |              |   |
|---|-------------|---|-------------|---|-------------|---|--------------|---|
| 0 | 0           | 0 | 0.1407944   | 0 | 0           | 0 | 0.004005536  | 0 |
| 0 | 0           | 0 | 0           | 0 | 0           | 0 | 0            | 0 |
| 0 | 0           | 0 | 0.070322373 | 0 | 0.10284998  | 0 | 0.0187419    | 0 |
| 0 | 0           | 0 | 0           | 0 | 0           | 0 | -0.0049465   | 0 |
| 0 | 0.48732837  | 0 | 0           | 0 | 0           | 0 | 0            | 0 |
| 0 | 0.46641092  | 0 | 0           | 0 | 0           | 0 | -0.00858886  | 0 |
| 0 | 0           | 0 | 0           | 0 | 0           | 0 | -0.006112654 | 0 |
| 0 | 0           | 0 | 0.074561881 | 0 | 0.074703612 | 0 | 0.000902328  | 0 |
| 0 | 0.48065434  | 0 | 0.067926385 | 0 | 0.072148836 | 0 | -0.015155593 | 0 |
| 0 | 0.47508751  | 0 | 0           | 0 | 0.14203768  | 0 | -0.012400361 | 0 |
| 0 | 0.47638295  | 0 | 0.06912174  | 0 | 0.074694967 | 0 | 0            | 0 |
| 0 | 0.47382338  | 0 | 0.141205    | 0 | 0           | 0 | -0.012143585 | 0 |
| 0 | -0.12798786 | 0 | 0           | 0 | 0           | 0 | 0            | 0 |
| 0 | 0.48709305  | 0 | 0           | 0 | 0           | 0 | -0.009867148 | 0 |
| 0 | 0.4809157   | 0 | 0           | 0 | 0.13891481  | 0 | -0.014840835 | 0 |
| 0 | 0.47945623  | 0 | 0.1383405   | 0 | 0           | 0 | -0.014542576 | 0 |
| 0 | 0.47303235  | 0 | 0           | 0 | 0.1444698   | 0 | 0            | 0 |
| 0 | 0.44637994  | 0 | 0           | 0 | 0.14421073  | 0 | -0.014541539 | 0 |
| 0 | 0.44669757  | 0 | 0.14346973  | 0 | 0           | 0 | -0.014238338 | 0 |
| 0 | 0.47190533  | 0 | 0.14363154  | 0 | 0           | 0 | 0            | 0 |
| 0 | 0.45117307  | 0 | 0.072241949 | 0 | 0.072730903 | 0 | 0            | 0 |
| 0 | 0.48521743  | 0 | 0.06844915  | 0 | 0.070968323 | 0 | 0            | 0 |
| 0 | 0           | 0 | 0.072215522 | 0 | 0.089769564 | 0 | 0.006613339  | 0 |
| 0 | 0.44845755  | 0 | 0.069659089 | 0 | 0.069201156 | 0 | -0.0094827   | 0 |
| 0 | 0           | 0 | 0           | 0 | 0           | 0 | -0.011624268 | 0 |
| 0 | -0.15522628 | 0 | 0           | 0 | 0           | 0 | -0.004111077 | 0 |
| 0 | 0.45575987  | 0 | 0           | 0 | 0           | 0 | -0.018003147 | 0 |
| 0 | -0.12712822 | 0 | 0           | 0 | 0           | 0 | -0.005324245 | 0 |
| 0 | 0.44751     | 0 | 0.070218445 | 0 | 0.059676025 | 0 | -0.014300344 | 0 |
| 0 | 0           | 0 | 0.073706305 | 0 | 0.11337713  | 0 | 0.006398534  | 0 |
| 0 | 0           | 0 | 0           | 0 | 0           | 0 | -0.008912582 | 0 |
| 0 | 0.45560858  | 0 | 0.077575753 | 0 | 0.079920478 | 0 | -0.021312315 | 0 |
| 0 | 0.44488037  | 0 | 0.076900624 | 0 | 0.075558431 | 0 | -0.018026757 | 0 |
| 0 | 0.46354327  | 0 | 0           | 0 | 0.15204961  | 0 | -0.01845531  | 0 |
| 0 | 0.46242827  | 0 | 0.15115714  | 0 | 0           | 0 | -0.018116603 | 0 |
| 0 | -0.1543339  | 0 | 0           | 0 | 0           | 0 | -0.011340401 | 0 |
| 0 | 0.47802152  | 0 | 0.074253657 | 0 | 0.071740708 | 0 | -0.018578341 | 0 |
| 0 | 0.46841536  | 0 | 0.076451686 | 0 | 0.076540365 | 0 | 0            | 0 |
| 0 | 0           | 0 | 0.068134401 | 0 | 0.074935197 | 0 | -0.012597151 | 0 |
| 0 | 0           | 0 | 0           | 0 | 0.14490445  | 0 | -0.015128505 | 0 |
| 0 | 0           | 0 | 0.071344646 | 0 | 0.074113394 | 0 | -0.014807636 | 0 |
| 0 | 0           | 0 | 0.14403601  | 0 | 0           | 0 | -0.014809872 | 0 |
| 0 | 0           | 0 | 0.070275799 | 0 | 0.075311488 | 0 | 0            | 0 |
| 0 | 0           | 0 | 0.067777148 | 0 | 0.071650763 | 0 | -0.015095314 | 0 |
| 0 | -0.13492818 | 0 | 0           | 0 | 0           | 0 | -0.008161394 | 0 |
| 0 | -0.14661927 | 0 | 0.068600378 | 0 | 0.075613245 | 0 | -0.012429197 | 0 |
| 0 | -0.15111733 | 0 | 0           | 0 | 0.14529787  | 0 | -0.014319605 | 0 |

|   |             |   |             |   |             |   |              |   |
|---|-------------|---|-------------|---|-------------|---|--------------|---|
| 0 | -0.14010269 | 0 | 0.067648655 | 0 | 0.073154051 | 0 | -0.014291408 | 0 |
| 0 | -0.15215949 | 0 | 0.14438902  | 0 | 0           | 0 | -0.014012072 | 0 |
| 0 | -0.14728408 | 0 | 0.069778159 | 0 | 0.076209711 | 0 | 0            | 0 |
| 0 | 0           | 0 | 0.075110658 | 0 | 0.077722009 | 0 | -0.018442517 | 0 |
| 0 | -0.17669028 | 0 | 0.071522209 | 0 | 0.074073308 | 0 | -0.013895767 | 0 |
| 0 | -0.15644799 | 0 | 0.074656137 | 0 | 0.078458066 | 0 | -0.017647958 | 0 |
| 0 | 0.42706387  | 0 | 0           | 0 | 0           | 0 | -0.027012261 | 0 |
| 0 | 0           | 0 | 0.084927605 | 0 | 0.051232173 | 0 | 0.025349031  | 0 |
| 0 | 0           | 0 | 0.13494538  | 0 | 0           | 0 | 0.024484539  | 0 |
| 0 | 0           | 0 | 0           | 0 | 0.13490324  | 0 | 0.024251746  | 0 |
| 0 | 0           | 0 | 0.087003135 | 0 | 0.056945317 | 0 | 0.02044665   | 0 |
| 0 | 0           | 0 | 0.087978603 | 0 | 0.052858367 | 0 | 0.022246615  | 0 |
| 0 | 0           | 0 | 0.083378671 | 0 | 0.054438492 | 0 | 0            | 0 |
| 0 | 0           | 0 | 0           | 0 | 0           | 0 | 0.006441411  | 0 |
| 0 | 0.46859344  | 0 | 0           | 0 | 0           | 0 | -0.003485082 | 0 |
| 0 | 0.46750907  | 0 | 0           | 0 | 0           | 0 | 0            | 0 |
| 0 | 0.43980184  | 0 | 0           | 0 | 0           | 0 | -0.004101277 | 0 |
| 0 | 0.41019775  | 0 | 0           | 0 | 0           | 0 | 0            | 0 |
| 0 | 0.44110085  | 0 | 0           | 0 | 0           | 0 | -0.003605498 | 0 |
| 0 | 0           | 0 | 0           | 0 | 0           | 0 | -0.004624768 | 0 |
| 0 | 0.42427675  | 0 | 0           | 0 | 0           | 0 | -0.003647538 | 0 |
| 0 | 0           | 0 | 0           | 0 | 0           | 0 | -0.003866889 | 0 |
| 0 | -0.15358096 | 0 | 0           | 0 | 0           | 0 | -0.003802019 | 0 |
| 0 | 0.45854493  | 0 | 0           | 0 | 0           | 0 | -0.008967169 | 0 |
| 0 | 0.41607547  | 0 | 0           | 0 | 0           | 0 | 0.009152944  | 0 |
| 0 | 0.40122907  | 0 | 0           | 0 | 0           | 0 | -0.0078602   | 0 |
| 0 | -0.21182014 | 0 | 0           | 0 | 0           | 0 | -0.002961479 | 0 |
| 0 | 0           | 0 | 0.063002292 | 0 | 0.089406369 | 0 | -0.001761321 | 0 |
| 0 | 0           | 0 | 0.087454419 | 0 | 0.081852367 | 0 | 0.028392559  | 0 |
| 0 | 0.39105869  | 0 | 0           | 0 | 0           | 0 | -0.00643135  | 0 |
| 0 | 0.45380681  | 0 | 0           | 0 | 0           | 0 | -0.010610631 | 0 |
| 0 | 0           | 0 | 0.086855026 | 0 | 0.057138982 | 0 | 0.03402178   | 0 |
| 0 | 0.50122756  | 0 | 0.13222435  | 0 | 0           | 0 | 0            | 0 |
| 0 | 0.50203715  | 0 | 0           | 0 | 0.13259316  | 0 | 0            | 0 |
| 0 | 0.47512007  | 0 | 0.077359159 | 0 | 0.053311973 | 0 | 0            | 0 |
| 0 | 0.50549629  | 0 | 0.13187852  | 0 | 0           | 0 | 0            | 0 |
| 0 | 0.49509122  | 0 | 0.13568054  | 0 | 0           | 0 | -0.012282903 | 0 |
| 0 | 0.47306167  | 0 | 0.12898317  | 0 | 0           | 0 | -0.007231975 | 0 |
| 0 | 0.49718672  | 0 | 0.076300266 | 0 | 0.061729078 | 0 | 0            | 0 |
| 0 | 0.47434902  | 0 | 0.13050308  | 0 | 0           | 0 | 0            | 0 |
| 0 | 0.49597647  | 0 | 0           | 0 | 0.13609731  | 0 | -0.012564387 | 0 |
| 0 | 0.50632474  | 0 | 0           | 0 | 0.1322419   | 0 | 0            | 0 |
| 0 | 0.47287827  | 0 | 0           | 0 | 0.12910362  | 0 | -0.00750226  | 0 |
| 0 | 0.47498464  | 0 | 0.076564936 | 0 | 0.057323423 | 0 | -0.010163036 | 0 |
| 0 | 0.47415666  | 0 | 0           | 0 | 0.13063722  | 0 | 0            | 0 |
| 0 | 0.50114693  | 0 | 0.13568211  | 0 | 0           | 0 | 0            | 0 |
| 0 | 0.48776437  | 0 | 0.14091643  | 0 | 0           | 0 | -0.014423433 | 0 |

|   |             |   |             |   |             |   |              |   |
|---|-------------|---|-------------|---|-------------|---|--------------|---|
| 0 | 0.47852242  | 0 | 0.076736084 | 0 | 0.055903285 | 0 | 0            | 0 |
| 0 | 0.47537186  | 0 | 0.13142578  | 0 | 0           | 0 | -0.00939739  | 0 |
| 0 | 0.50206235  | 0 | 0           | 0 | 0.13601606  | 0 | 0            | 0 |
| 0 | 0.48907301  | 0 | 0.084067181 | 0 | 0.060113612 | 0 | 0            | 0 |
| 0 | 0.48833017  | 0 | 0           | 0 | 0.14148408  | 0 | -0.01486525  | 0 |
| 0 | 0.46964752  | 0 | 0.0820567   | 0 | 0.056633219 | 0 | -0.012256605 | 0 |
| 0 | 0.47506996  | 0 | 0           | 0 | 0.13164948  | 0 | -0.009669161 | 0 |
| 0 | 0.49992629  | 0 | 0.13651037  | 0 | 0           | 0 | -0.011889748 | 0 |
| 0 | 0.47100287  | 0 | 0.13490722  | 0 | 0           | 0 | -0.010663872 | 0 |
| 0 | 0.50387406  | 0 | 0.07848732  | 0 | 0.059506768 | 0 | 0            | 0 |
| 0 | 0.47440194  | 0 | 0.08172504  | 0 | 0.054523832 | 0 | 0            | 0 |
| 0 | 0.50070751  | 0 | 0           | 0 | 0.13694545  | 0 | -0.012233347 | 0 |
| 0 | 0.47077419  | 0 | 0           | 0 | 0.13511462  | 0 | -0.011007546 | 0 |
| 0 | 0.47461895  | 0 | 0.079894805 | 0 | 0.057278261 | 0 | -0.011697674 | 0 |
| 0 | 0.47854536  | 0 | 0.083949264 | 0 | 0.066346127 | 0 | -0.020590575 | 0 |
| 0 | 0           | 0 | 0.075982183 | 0 | 0.057801535 | 0 | 0            | 0 |
| 0 | 0           | 0 | 0.13195473  | 0 | 0           | 0 | -0.009341459 | 0 |
| 0 | 0           | 0 | 0.13120998  | 0 | 0           | 0 | 0            | 0 |
| 0 | 0           | 0 | 0           | 0 | 0.13233309  | 0 | -0.00966698  | 0 |
| 0 | 0           | 0 | 0           | 0 | 0.13150933  | 0 | 0            | 0 |
| 0 | 0           | 0 | 0.076817064 | 0 | 0.053754628 | 0 | -0.007789377 | 0 |
| 0 | 0           | 0 | 0.075336366 | 0 | 0.061949913 | 0 | -0.012738331 | 0 |
| 0 | 0           | 0 | 0.074399725 | 0 | 0.059059863 | 0 | 0            | 0 |
| 0 | 0           | 0 | 0.07805126  | 0 | 0.053936323 | 0 | 0            | 0 |
| 0 | 0           | 0 | 0.13214936  | 0 | 0           | 0 | -0.009943284 | 0 |
| 0 | 0           | 0 | 0.13079771  | 0 | 0           | 0 | -0.008888564 | 0 |
| 0 | 0           | 0 | 0           | 0 | 0.13254526  | 0 | -0.010268767 | 0 |
| 0 | 0           | 0 | 0.08142033  | 0 | 0.060388272 | 0 | -0.014405186 | 0 |
| 0 | 0           | 0 | 0.13546647  | 0 | 0           | 0 | -0.011090115 | 0 |
| 0 | 0           | 0 | 0.079401692 | 0 | 0.05748857  | 0 | 0            | 0 |
| 0 | 0           | 0 | 0           | 0 | 0.13096956  | 0 | -0.009179934 | 0 |
| 0 | 0           | 0 | 0.076254904 | 0 | 0.056751762 | 0 | -0.009903179 | 0 |
| 0 | 0           | 0 | 0           | 0 | 0.13584602  | 0 | -0.011449435 | 0 |
| 0 | -0.1195071  | 0 | 0.075848838 | 0 | 0.058839444 | 0 | 0            | 0 |
| 0 | 0           | 0 | 0.080055246 | 0 | 0.056091869 | 0 | -0.010941633 | 0 |
| 0 | 0           | 0 | 0.077514884 | 0 | 0.060285378 | 0 | -0.012187365 | 0 |
| 0 | -0.12160642 | 0 | 0.13284731  | 0 | 0           | 0 | -0.009043167 | 0 |
| 0 | 0.46323613  | 0 | 0.079300014 | 0 | 0.071264113 | 0 | 0            | 0 |
| 0 | -0.11669667 | 0 | 0.13149562  | 0 | 0           | 0 | 0            | 0 |
| 0 | -0.12083325 | 0 | 0           | 0 | 0.13325558  | 0 | -0.009380178 | 0 |
| 0 | -0.11575931 | 0 | 0           | 0 | 0.13182823  | 0 | 0            | 0 |
| 0 | 0.46022205  | 0 | 0.14928714  | 0 | 0           | 0 | -0.008653239 | 0 |
| 0 | 0.46014795  | 0 | 0           | 0 | 0.14954363  | 0 | -0.008993815 | 0 |
| 0 | 0.46241876  | 0 | 0.14884073  | 0 | 0           | 0 | 0            | 0 |
| 0 | -0.11395903 | 0 | 0.074060717 | 0 | 0.05968847  | 0 | 0            | 0 |
| 0 | 0.46398619  | 0 | 0           | 0 | 0.14929081  | 0 | 0            | 0 |
| 0 | -0.11730923 | 0 | 0.13239379  | 0 | 0           | 0 | -0.009205848 | 0 |

|   |             |   |             |   |             |   |              |   |
|---|-------------|---|-------------|---|-------------|---|--------------|---|
| 0 | -0.12571796 | 0 | 0.075336122 | 0 | 0.063024004 | 0 | -0.012564108 | 0 |
| 0 | -0.11647907 | 0 | 0           | 0 | 0.13281185  | 0 | -0.009493099 | 0 |
| 0 | -0.11816419 | 0 | 0.07879639  | 0 | 0.05833272  | 0 | 0            | 0 |
| 0 | -0.12168444 | 0 | 0.13566112  | 0 | 0           | 0 | -0.01032645  | 0 |
| 0 | -0.15042943 | 0 | 0.077030451 | 0 | 0.053981777 | 0 | -0.007206567 | 0 |
| 0 | 0.45972113  | 0 | 0.082465401 | 0 | 0.072718937 | 0 | -0.011017909 | 0 |
| 0 | -0.13231681 | 0 | 0.081494713 | 0 | 0.061464104 | 0 | -0.014270467 | 0 |
| 0 | -0.14891324 | 0 | 0.077972358 | 0 | 0.054146065 | 0 | 0            | 0 |
| 0 | -0.12087453 | 0 | 0           | 0 | 0.13606257  | 0 | -0.010691337 | 0 |
| 0 | -0.15147249 | 0 | 0.13088769  | 0 | 0           | 0 | -0.008055769 | 0 |
| 0 | 0.46205916  | 0 | 0.083254666 | 0 | 0.071452572 | 0 | 0            | 0 |
| 0 | -0.11930989 | 0 | 0.077138726 | 0 | 0.060862296 | 0 | -0.011417182 | 0 |
| 0 | -0.15166099 | 0 | 0           | 0 | 0.13105098  | 0 | -0.008336192 | 0 |
| 0 | 0.45762509  | 0 | 0.15315917  | 0 | 0           | 0 | -0.010770792 | 0 |
| 0 | -0.14795497 | 0 | 0.076449492 | 0 | 0.056620171 | 0 | -0.00904102  | 0 |
| 0 | 0.45896146  | 0 | 0           | 0 | 0.15368853  | 0 | -0.011175079 | 0 |
| 0 | -0.15212587 | 0 | 0.080792998 | 0 | 0.05529515  | 0 | -0.010107759 | 0 |
| 0 | 0           | 0 | 0.078805194 | 0 | 0.071989243 | 0 | -0.009208187 | 0 |
| 0 | 0.46541061  | 0 | 0.076420542 | 0 | 0.084719938 | 0 | -0.011236786 | 0 |
| 0 | 0.45577865  | 0 | 0.07807023  | 0 | 0.07957147  | 0 | 0            | 0 |
| 0 | 0           | 0 | 0.079320994 | 0 | 0.070867203 | 0 | 0            | 0 |
| 0 | 0.45268069  | 0 | 0           | 0 | 0.15673302  | 0 | -0.011048471 | 0 |
| 0 | 0           | 0 | 0.14877806  | 0 | 0           | 0 | -0.008979334 | 0 |
| 0 | 0.45116109  | 0 | 0.15612953  | 0 | 0           | 0 | -0.010713182 | 0 |
| 0 | 0           | 0 | 0           | 0 | 0.14926744  | 0 | -0.009304244 | 0 |
| 0 | 0           | 0 | 0.082283305 | 0 | 0.071970148 | 0 | -0.01114899  | 0 |
| 0 | 0.45030516  | 0 | 0.081335911 | 0 | 0.080693997 | 0 | -0.013062714 | 0 |
| 0 | 0.46485598  | 0 | 0.072775976 | 0 | 0.075558451 | 0 | 0.005510399  | 0 |
| 0 | 0.46654257  | 0 | 0.071966141 | 0 | 0.077186366 | 0 | 0            | 0 |
| 0 | -0.16279838 | 0 | 0.079002303 | 0 | 0.072200797 | 0 | -0.008359857 | 0 |
| 0 | -0.15728583 | 0 | 0.079132612 | 0 | 0.07225254  | 0 | 0            | 0 |
| 0 | 0.47155308  | 0 | 0.068351723 | 0 | 0.077142957 | 0 | 0.010205527  | 0 |
| 0 | 0.46833953  | 0 | 0           | 0 | 0.14774634  | 0 | 0.005213588  | 0 |
| 0 | 0.46699626  | 0 | 0.1470151   | 0 | 0           | 0 | 0.005740755  | 0 |
| 0 | -0.16100371 | 0 | 0.14991134  | 0 | 0           | 0 | -0.008168749 | 0 |
| 0 | -0.15961759 | 0 | 0           | 0 | 0.15042972  | 0 | -0.008520932 | 0 |
| 0 | -0.16184672 | 0 | 0.079582094 | 0 | 0.07559868  | 0 | -0.010198259 | 0 |
| 0 | 0           | 0 | 0.077688683 | 0 | 0.079861111 | 0 | -0.011248669 | 0 |
| 0 | 0.46094544  | 0 | 0.072930897 | 0 | 0.081334447 | 0 | 0.001692676  | 0 |
| 0 | 0           | 0 | 0.072917662 | 0 | 0.07570494  | 0 | 0.004810605  | 0 |
| 0 | -0.16833751 | 0 | 0.077505707 | 0 | 0.081333843 | 0 | -0.010469876 | 0 |
| 0 | 0           | 0 | 0.067445478 | 0 | 0.069951967 | 0 | 0            | 0 |
| 0 | 0           | 0 | 0.13529339  | 0 | 0           | 0 | 0.001449325  | 0 |
| 0 | 0           | 0 | 0           | 0 | 0.13595425  | 0 | 0.001040834  | 0 |
| 0 | 0           | 0 | 0.069261178 | 0 | 0.068402861 | 0 | 0.000361493  | 0 |
| 0 | 0.4853534   | 0 | 0.075169018 | 0 | 0.05994766  | 0 | 0            | 0 |
| 0 | 0.48172783  | 0 | 0.13403131  | 0 | 0           | 0 | -0.00843822  | 0 |

|   |             |   |             |   |             |   |              |
|---|-------------|---|-------------|---|-------------|---|--------------|
| 0 | 0.48060698  | 0 | 0.13547631  | 0 | 0           | 0 | 0            |
| 0 | 0.4830107   | 0 | 0           | 0 | 0.1342556   | 0 | -0.008755949 |
| 0 | 0.48169102  | 0 | 0           | 0 | 0.13587198  | 0 | 0            |
| 0 | -0.15316341 | 0 | 0.072644572 | 0 | 0.077079236 | 0 | 0.005299669  |
| 0 | 0           | 0 | 0.074200283 | 0 | 0.067771031 | 0 | -0.001010815 |
| 0 | 0.44799904  | 0 | 0.07863968  | 0 | 0.057578764 | 0 | 0            |
| 0 | 0.4453323   | 0 | 0.13491641  | 0 | 0           | 0 | -0.008197441 |
| 0 | 0           | 0 | 0.074069651 | 0 | 0.073145307 | 0 | -0.003663544 |
| 0 | 0.44515094  | 0 | 0           | 0 | 0.13515757  | 0 | -0.008501236 |
| 0 | 0.48090286  | 0 | 0.079409481 | 0 | 0.060611626 | 0 | -0.011447956 |
| 0 | 0.47799143  | 0 | 0.080853129 | 0 | 0.061921261 | 0 | 0            |
| 0 | 0.47416158  | 0 | 0.14122983  | 0 | 0           | 0 | -0.011238144 |
| 0 | 0.47516043  | 0 | 0           | 0 | 0.14169248  | 0 | -0.011582417 |
| 0 | 0.44599189  | 0 | 0.077406315 | 0 | 0.046870179 | 0 | -0.008172977 |
| 0 | 0.50059706  | 0 | 0.069702181 | 0 | 0.057891901 | 0 | 0            |
| 0 | 0.44392988  | 0 | 0.082636791 | 0 | 0.059183407 | 0 | -0.011031286 |
| 0 | 0.4998583   | 0 | 0.12596503  | 0 | 0           | 0 | -0.00063146  |
| 0 | 0.50064307  | 0 | 0           | 0 | 0.12642294  | 0 | -0.000969106 |
| 0 | 0.49395539  | 0 | 0.073459265 | 0 | 0.059169178 | 0 | -0.003910865 |
| 0 | 0           | 0 | 0.074753031 | 0 | 0.060143061 | 0 | -0.008966405 |
| 0 | 0           | 0 | 0.075828779 | 0 | 0.061274293 | 0 | 0            |
| 0 | 0.48752376  | 0 | 0.06965381  | 0 | 0.06516837  | 0 | 0.003679895  |
| 0 | 0           | 0 | 0.13570419  | 0 | 0           | 0 | -0.008780453 |
| 0 | 0           | 0 | 0           | 0 | 0.1361377   | 0 | -0.00910031  |
| 0 | 0           | 0 | 0.078161363 | 0 | 0.058362993 | 0 | -0.008737484 |
| 0 | 0           | 0 | 0.079898624 | 0 | 0.062672992 | 0 | -0.011545077 |
| 0 | -0.13806981 | 0 | 0.074633542 | 0 | 0.061611798 | 0 | -0.008170052 |
| 0 | -0.13872439 | 0 | 0.075392464 | 0 | 0.062076142 | 0 | 0            |
| 0 | -0.14173948 | 0 | 0.1360143   | 0 | 0           | 0 | -0.007976186 |
| 0 | -0.14081059 | 0 | 0           | 0 | 0.13647477  | 0 | -0.008298729 |
| 0 | 0.45023006  | 0 | 0.072576337 | 0 | 0.048581606 | 0 | 0.003218776  |
| 0 | 0           | 0 | 0.069842903 | 0 | 0.057666624 | 0 | -0.001124794 |
| 0 | -0.17804763 | 0 | 0.078347703 | 0 | 0.058322004 | 0 | -0.007847409 |
| 0 | -0.14488295 | 0 | 0.079460461 | 0 | 0.063364555 | 0 | -0.010743678 |
| 0 | -0.12095769 | 0 | 0.070534753 | 0 | 0.057891965 | 0 | -0.000811989 |
| 0 | 0.49188897  | 0 | 0           | 0 | 0           | 0 | 0            |
| 0 | 0.46788976  | 0 | 0           | 0 | 0           | 0 | -0.004611235 |
| 0 | 0           | 0 | 0.075195914 | 0 | 0.1004839   | 0 | 0.00805146   |
| 0 | 0.49263431  | 0 | 0           | 0 | 0           | 0 | -0.005791689 |
| 0 | 0.46702297  | 0 | 0           | 0 | 0           | 0 | -0.011282041 |
| 0 | 0           | 0 | 0.069171913 | 0 | 0.073735177 | 0 | 0.003712333  |
| 0 | 0           | 0 | 0           | 0 | 0           | 0 | -0.005070445 |
| 0 | 0.48481202  | 0 | 0           | 0 | 0           | 0 | -0.008789488 |
| 0 | 0.47501476  | 0 | 0.068011106 | 0 | 0.075129158 | 0 | -0.012210642 |
| 0 | 0.46869135  | 0 | 0           | 0 | 0.1450477   | 0 | -0.014790232 |
| 0 | 0.46763956  | 0 | 0.14416441  | 0 | 0           | 0 | -0.0144545   |
| 0 | 0.4808099   | 0 | 0.06780577  | 0 | 0.072218455 | 0 | -0.014743177 |

|   |             |   |             |   |             |   |              |   |
|---|-------------|---|-------------|---|-------------|---|--------------|---|
| 0 | 0.44664845  | 0 | 0.071436309 | 0 | 0.07406299  | 0 | -0.014462152 | 0 |
| 0 | 0.4725366   | 0 | 0.07008767  | 0 | 0.075654537 | 0 | 0            | 0 |
| 0 | -0.12927966 | 0 | 0           | 0 | 0           | 0 | -0.004297455 | 0 |
| 0 | 0.46305453  | 0 | 0.07515153  | 0 | 0.078161227 | 0 | -0.018321814 | 0 |
| 0 | 0           | 0 | 0.069567138 | 0 | 0.076603262 | 0 | -0.015016891 | 0 |
| 0 | -0.15144068 | 0 | 0.069161596 | 0 | 0.077380181 | 0 | -0.014218101 | 0 |
| 0 | 0           | 0 | 0.084202678 | 0 | 0.052247025 | 0 | 0.024335236  | 0 |
| 0 | 0.46619916  | 0 | 0           | 0 | 0           | 0 | -0.004285562 | 0 |
| 0 | 0.40918914  | 0 | 0           | 0 | 0           | 0 | -0.003467387 | 0 |
| 0 | 0.5019494   | 0 | 0.075806445 | 0 | 0.058032455 | 0 | 0            | 0 |
| 0 | 0.49988991  | 0 | 0.13200497  | 0 | 0           | 0 | -0.009009261 | 0 |
| 0 | 0.50313849  | 0 | 0.13134502  | 0 | 0           | 0 | 0            | 0 |
| 0 | 0.5007034   | 0 | 0           | 0 | 0.13240499  | 0 | -0.009368765 | 0 |
| 0 | 0.50414074  | 0 | 0           | 0 | 0.13165086  | 0 | 0            | 0 |
| 0 | 0.49592715  | 0 | 0.075205788 | 0 | 0.062130194 | 0 | -0.012350028 | 0 |
| 0 | 0.50596412  | 0 | 0.074270641 | 0 | 0.059324048 | 0 | 0            | 0 |
| 0 | 0.50253146  | 0 | 0.13226836  | 0 | 0           | 0 | -0.009658979 | 0 |
| 0 | 0.47312957  | 0 | 0.076818409 | 0 | 0.053592488 | 0 | -0.007301419 | 0 |
| 0 | 0.4743677   | 0 | 0.077921936 | 0 | 0.054142673 | 0 | 0            | 0 |
| 0 | 0.50329179  | 0 | 0           | 0 | 0.13267395  | 0 | -0.009976781 | 0 |
| 0 | 0.47165405  | 0 | 0.13085316  | 0 | 0           | 0 | -0.008555114 | 0 |
| 0 | 0.49795543  | 0 | 0.13592295  | 0 | 0           | 0 | -0.010976731 | 0 |
| 0 | 0.50170392  | 0 | 0.07953161  | 0 | 0.057830392 | 0 | 0            | 0 |
| 0 | 0.48853831  | 0 | 0.081797675 | 0 | 0.060758551 | 0 | -0.014485261 | 0 |
| 0 | 0.47143827  | 0 | 0           | 0 | 0.13102586  | 0 | -0.008848012 | 0 |
| 0 | 0.47528106  | 0 | 0.076374252 | 0 | 0.056683833 | 0 | -0.009556263 | 0 |
| 0 | 0.49877499  | 0 | 0           | 0 | 0.13630491  | 0 | -0.011338818 | 0 |
| 0 | 0.50043051  | 0 | 0.077727241 | 0 | 0.060534662 | 0 | -0.012062624 | 0 |
| 0 | 0.47096454  | 0 | 0.081033323 | 0 | 0.055471072 | 0 | -0.010826501 | 0 |
| 0 | 0           | 0 | 0.075171575 | 0 | 0.058409696 | 0 | -0.009462846 | 0 |
| 0 | 0           | 0 | 0.075459142 | 0 | 0.057423908 | 0 | 0            | 0 |
| 0 | 0           | 0 | 0.13159327  | 0 | 0           | 0 | -0.009075516 | 0 |
| 0 | 0           | 0 | 0           | 0 | 0.13193244  | 0 | -0.009377815 | 0 |
| 0 | 0           | 0 | 0.073942891 | 0 | 0.059949247 | 0 | -0.010153042 | 0 |
| 0 | 0           | 0 | 0.077433521 | 0 | 0.054956136 | 0 | -0.009055186 | 0 |
| 0 | 0           | 0 | 0.078534779 | 0 | 0.058636898 | 0 | -0.011267013 | 0 |
| 0 | -0.12089122 | 0 | 0.075184829 | 0 | 0.059311918 | 0 | -0.009165233 | 0 |
| 0 | -0.11613942 | 0 | 0.075063551 | 0 | 0.058125109 | 0 | 0            | 0 |
| 0 | 0.46043536  | 0 | 0.07889768  | 0 | 0.072042122 | 0 | -0.008865181 | 0 |
| 0 | -0.11917532 | 0 | 0.13184366  | 0 | 0           | 0 | -0.008314316 | 0 |
| 0 | 0.46368281  | 0 | 0.079254662 | 0 | 0.071384356 | 0 | 0            | 0 |
| 0 | -0.11832011 | 0 | 0           | 0 | 0.13221109  | 0 | -0.008623178 | 0 |
| 0 | 0.4599025   | 0 | 0.14920938  | 0 | 0           | 0 | -0.008632621 | 0 |
| 0 | -0.11680632 | 0 | 0.073570128 | 0 | 0.060584608 | 0 | -0.00938381  | 0 |
| 0 | 0.46128055  | 0 | 0           | 0 | 0.14970485  | 0 | -0.008981777 | 0 |
| 0 | -0.12117075 | 0 | 0.07818255  | 0 | 0.059201211 | 0 | -0.010509742 | 0 |
| 0 | -0.1514734  | 0 | 0.077591403 | 0 | 0.054876352 | 0 | -0.008191466 | 0 |



|   |             |   |             |   |             |   |              |   |
|---|-------------|---|-------------|---|-------------|---|--------------|---|
| 0 | 0.45884173  | 0 | 0.082517115 | 0 | 0.072474432 | 0 | -0.010982646 | 0 |
| 0 | 0.45260737  | 0 | 0.077647414 | 0 | 0.080397476 | 0 | -0.010921918 | 0 |
| 0 | 0           | 0 | 0.078911286 | 0 | 0.071688786 | 0 | -0.009198987 | 0 |
| 0 | 0.4682362   | 0 | 0.072525635 | 0 | 0.076429212 | 0 | 0.005436553  | 0 |
| 0 | -0.15978645 | 0 | 0.078728427 | 0 | 0.073036608 | 0 | -0.008393481 | 0 |
| 0 | 0           | 0 | 0.070015417 | 0 | 0.067228836 | 0 | 0.001188375  | 0 |
| 0 | 0.4827638   | 0 | 0.074750986 | 0 | 0.060748186 | 0 | -0.00865279  | 0 |
| 0 | 0.48122603  | 0 | 0.075687062 | 0 | 0.061564023 | 0 | 0            | 0 |
| 0 | 0.47812562  | 0 | 0.1358287   | 0 | 0           | 0 | -0.008437262 | 0 |
| 0 | 0.47905447  | 0 | 0           | 0 | 0.13627082  | 0 | -0.008758879 | 0 |
| 0 | 0.44532394  | 0 | 0.078252014 | 0 | 0.058336775 | 0 | -0.008374121 | 0 |
| 0 | 0.47471444  | 0 | 0.080047296 | 0 | 0.063002482 | 0 | -0.011418484 | 0 |
| 0 | 0.50057196  | 0 | 0.06962386  | 0 | 0.057939222 | 0 | -0.0007537   | 0 |
| 0 | 0           | 0 | 0.075392796 | 0 | 0.06210947  | 0 | -0.008973578 | 0 |
| 0 | -0.1411626  | 0 | 0.075003421 | 0 | 0.06282971  | 0 | -0.008172102 | 0 |
| 0 | 0.49044916  | 0 | 0           | 0 | 0           | 0 | -0.004758241 | 0 |
| 0 | 0.46821755  | 0 | 0.06945184  | 0 | 0.076860666 | 0 | -0.01469012  | 0 |
| 0 | 0.50058442  | 0 | 0.075027587 | 0 | 0.058615741 | 0 | -0.009102386 | 0 |
| 0 | 0.50372991  | 0 | 0.075353104 | 0 | 0.057668081 | 0 | 0            | 0 |
| 0 | 0.50056551  | 0 | 0.13171037  | 0 | 0           | 0 | -0.00876944  | 0 |
| 0 | 0.50142207  | 0 | 0           | 0 | 0.13206163  | 0 | -0.009077449 | 0 |
| 0 | 0.50303174  | 0 | 0.073835542 | 0 | 0.060179349 | 0 | -0.009835272 | 0 |
| 0 | 0.4716068   | 0 | 0.077522881 | 0 | 0.054924626 | 0 | -0.008722561 | 0 |
| 0 | 0.49846774  | 0 | 0.078787318 | 0 | 0.058848383 | 0 | -0.011155965 | 0 |
| 0 | 0           | 0 | 0.075019452 | 0 | 0.05827353  | 0 | -0.0092548   | 0 |
| 0 | -0.11866522 | 0 | 0.074646653 | 0 | 0.058919777 | 0 | -0.008497721 | 0 |
| 0 | 0.46111079  | 0 | 0.078844834 | 0 | 0.07219193  | 0 | -0.008853759 | 0 |
| 0 | 0.47863075  | 0 | 0.07527804  | 0 | 0.062357644 | 0 | -0.008645588 | 0 |
| 0 | 0.50105588  | 0 | 0.074897681 | 0 | 0.058520619 | 0 | -0.008961249 | 0 |

SUPPLEMENTARY TABLE 4

| Model   | BIC    | Loglike  | H2r       | SE | bsnp_rs2938864 | SE | bsnp_rs1001646 |
|---------|--------|----------|-----------|----|----------------|----|----------------|
| cov0    | 0      | -361.944 | 0.6608045 | 0  | 0              | 0  | 0              |
| cov4    | 2.7186 | -359.906 | 0.6654512 | 0  | 0              | 0  | 0              |
| cov7    | 3.1998 | -360.146 | 0.6433935 | 0  | 0              | 0  | 0              |
| cov3    | 3.2282 | -360.161 | 0.6423395 | 0  | 0              | 0  | 0              |
| cov8    | 3.3258 | -360.209 | 0.6437329 | 0  | 0              | 0  | 0              |
| cov9    | 3.7979 | -360.445 | 0.663795  | 0  | 0              | 0  | 0              |
| cov2    | 4.085  | -360.589 | 0.6625308 | 0  | 0              | 0  | 0.12871133     |
| cov10   | 4.1421 | -360.617 | 0.6645435 | 0  | 0              | 0  | 0              |
| cov3_9  | 4.5877 | -357.443 | 0.6350964 | 0  | 0              | 0  | 0              |
| cov3_10 | 4.997  | -357.648 | 0.6363289 | 0  | 0              | 0  | 0              |
| cov6    | 5.4115 | -361.252 | 0.6659444 | 0  | 0              | 0  | 0              |
| cov1    | 5.4437 | -361.268 | 0.6663568 | 0  | 0.090644777    | 0  | 0              |
| cov5    | 5.8512 | -361.472 | 0.6655897 | 0  | 0              | 0  | 0              |
| cov2_3  | 6.1647 | -358.232 | 0.6451598 | 0  | 0              | 0  | 0.15616198     |
| cov11   | 6.4733 | -361.783 | 0.6607402 | 0  | 0              | 0  | 0              |
| cov4_7  | 6.6297 | -358.464 | 0.65184   | 0  | 0              | 0  | 0              |
| cov4_8  | 6.7366 | -358.517 | 0.6521338 | 0  | 0              | 0  | 0              |
| cov4_5  | 6.8464 | -358.572 | 0.6555898 | 0  | 0              | 0  | 0              |
| cov3_4  | 6.9971 | -358.648 | 0.6521941 | 0  | 0              | 0  | 0              |
| cov7_9  | 7.311  | -358.805 | 0.6459777 | 0  | 0              | 0  | 0              |
| cov8_9  | 7.4392 | -358.869 | 0.6463696 | 0  | 0              | 0  | 0              |
| cov2_7  | 7.4503 | -358.874 | 0.6474389 | 0  | 0              | 0  | 0.12509183     |
| cov4_9  | 7.522  | -358.91  | 0.6670117 | 0  | 0              | 0  | 0              |
| cov2_8  | 7.5727 | -358.936 | 0.647753  | 0  | 0              | 0  | 0.1251831      |
| cov7_10 | 7.63   | -358.964 | 0.6466505 | 0  | 0              | 0  | 0              |
| cov4_10 | 7.7318 | -359.015 | 0.6678278 | 0  | 0              | 0  | 0              |
| cov8_10 | 7.7583 | -359.028 | 0.6470393 | 0  | 0              | 0  | 0              |
| cov1_3  | 7.8074 | -359.053 | 0.6488819 | 0  | 0.11821102     | 0  | 0              |
| cov3_6  | 7.8784 | -359.088 | 0.6490949 | 0  | 0              | 0  | 0              |
| cov1_7  | 8.7685 | -359.533 | 0.6503342 | 0  | 0.086733157    | 0  | 0              |
| cov6_7  | 8.7934 | -359.546 | 0.650083  | 0  | 0              | 0  | 0              |
| cov3_11 | 8.8529 | -359.576 | 0.6401217 | 0  | 0              | 0  | 0              |
| cov1_8  | 8.891  | -359.595 | 0.6506594 | 0  | 0.086856981    | 0  | 0              |
| cov6_8  | 8.9293 | -359.614 | 0.6504077 | 0  | 0              | 0  | 0              |
| cov5_7  | 9.03   | -359.664 | 0.6497425 | 0  | 0              | 0  | 0              |
| cov4_11 | 9.0633 | -359.681 | 0.667757  | 0  | 0              | 0  | 0              |
| cov5_8  | 9.1539 | -359.726 | 0.6500576 | 0  | 0              | 0  | 0              |
| cov1_4  | 9.2655 | -359.782 | 0.6634852 | 0  | -0.057746464   | 0  | 0              |
| cov7_11 | 9.266  | -359.782 | 0.6429829 | 0  | 0              | 0  | 0              |
| cov3_7  | 9.3096 | -359.804 | 0.6393079 | 0  | 0              | 0  | 0              |
| cov3_8  | 9.3762 | -359.837 | 0.6394425 | 0  | 0              | 0  | 0              |
| cov3_5  | 9.379  | -359.839 | 0.6485275 | 0  | 0              | 0  | 0              |
| cov4_6  | 9.3866 | -359.842 | 0.6644448 | 0  | 0              | 0  | 0              |
| cov8_11 | 9.4035 | -359.851 | 0.6433228 | 0  | 0              | 0  | 0              |
| cov2_4  | 9.5112 | -359.905 | 0.6653684 | 0  | 0              | 0  | 0.00574008     |

|            |         |          |           |   |              |   |             |
|------------|---------|----------|-----------|---|--------------|---|-------------|
| cov2_9     | 9.5746  | -359.936 | 0.6645454 | 0 | 0            | 0 | 0.08697783  |
| cov3_4_9   | 9.7708  | -356.637 | 0.6440412 | 0 | 0            | 0 | 0           |
| cov2_10    | 9.7888  | -360.044 | 0.6651264 | 0 | 0            | 0 | 0.091829699 |
| cov7_8     | 9.884   | -360.091 | 0.6435538 | 0 | 0            | 0 | 0           |
| cov3_4_10  | 10.057  | -356.78  | 0.645534  | 0 | 0            | 0 | 0           |
| cov5_9     | 10.1098 | -360.204 | 0.6669494 | 0 | 0            | 0 | 0           |
| cov2_3_9   | 10.1263 | -356.815 | 0.6395299 | 0 | 0            | 0 | 0.097296784 |
| cov2_11    | 10.3526 | -360.325 | 0.6641696 | 0 | 0            | 0 | 0.17993027  |
| cov9_10    | 10.3597 | -360.329 | 0.6614119 | 0 | 0            | 0 | 0           |
| cov6_9     | 10.3902 | -360.344 | 0.6656709 | 0 | 0            | 0 | 0           |
| cov2_3_10  | 10.3904 | -356.947 | 0.6408311 | 0 | 0            | 0 | 0.1021785   |
| cov5_10    | 10.3924 | -360.345 | 0.667869  | 0 | 0            | 0 | 0           |
| cov1_9     | 10.3997 | -360.349 | 0.6659986 | 0 | 0.038189026  | 0 | 0           |
| cov9_11    | 10.5925 | -360.445 | 0.6637949 | 0 | 0            | 0 | 0           |
| cov1_2     | 10.6625 | -360.48  | 0.6590576 | 0 | -0.070179301 | 0 | 0.1887273   |
| cov6_10    | 10.6666 | -360.482 | 0.6666027 | 0 | 0            | 0 | 0           |
| cov1_10    | 10.6755 | -360.487 | 0.6669452 | 0 | 0.044125235  | 0 | 0           |
| cov2_5     | 10.7276 | -360.513 | 0.6600312 | 0 | 0            | 0 | 0.16326696  |
| cov2_6     | 10.8042 | -360.551 | 0.6610154 | 0 | 0            | 0 | 0.15870794  |
| cov10_11   | 10.9334 | -360.616 | 0.6645281 | 0 | 0            | 0 | 0           |
| cov1_3_9   | 11.0771 | -357.29  | 0.6391884 | 0 | 0.048445861  | 0 | 0           |
| cov3_6_9   | 11.1219 | -357.313 | 0.6388512 | 0 | 0            | 0 | 0           |
| cov3_9_11  | 11.1785 | -357.341 | 0.6347731 | 0 | 0            | 0 | 0           |
| cov3_5_9   | 11.2434 | -357.374 | 0.6383981 | 0 | 0            | 0 | 0           |
| cov3_9_10  | 11.2613 | -357.383 | 0.6337963 | 0 | 0            | 0 | 0           |
| cov3_7_9   | 11.3786 | -357.441 | 0.6349873 | 0 | 0            | 0 | 0           |
| cov3_8_9   | 11.3819 | -357.443 | 0.6350545 | 0 | 0            | 0 | 0           |
| cov1_3_10  | 11.4005 | -357.452 | 0.6408126 | 0 | 0.05445291   | 0 | 0           |
| cov3_6_10  | 11.4545 | -357.479 | 0.6404908 | 0 | 0            | 0 | 0           |
| cov4_5_9   | 11.4942 | -357.499 | 0.6568549 | 0 | 0            | 0 | 0           |
| cov3_10_11 | 11.5327 | -357.518 | 0.6359961 | 0 | 0            | 0 | 0           |
| cov3_4_5   | 11.5917 | -357.548 | 0.6443221 | 0 | 0            | 0 | 0           |
| cov4_7_9   | 11.5943 | -357.549 | 0.652698  | 0 | 0            | 0 | 0           |
| cov3_5_10  | 11.6112 | -357.557 | 0.6400567 | 0 | 0            | 0 | 0           |
| cov4_5_7   | 11.6702 | -357.587 | 0.645406  | 0 | 0            | 0 | 0           |
| cov4_8_9   | 11.7047 | -357.604 | 0.653026  | 0 | 0            | 0 | 0           |
| cov2_3_5   | 11.7193 | -357.612 | 0.6333588 | 0 | 0            | 0 | 0.26408561  |
| cov4_5_10  | 11.7506 | -357.627 | 0.6578409 | 0 | 0            | 0 | 0           |
| cov4_5_8   | 11.7581 | -357.631 | 0.6456594 | 0 | 0            | 0 | 0           |
| cov3_7_10  | 11.7851 | -357.644 | 0.6361828 | 0 | 0            | 0 | 0           |
| cov3_8_10  | 11.7901 | -357.647 | 0.6362559 | 0 | 0            | 0 | 0           |
| cov4_7_10  | 11.7974 | -357.651 | 0.6535151 | 0 | 0            | 0 | 0           |
| cov4_8_10  | 11.9075 | -357.706 | 0.6538514 | 0 | 0            | 0 | 0           |
| cov1_11    | 11.9813 | -361.14  | 0.6696195 | 0 | 0.13763      | 0 | 0           |
| cov6_11    | 12.0104 | -361.154 | 0.6683656 | 0 | 0            | 0 | 0           |
| cov1_6     | 12.1688 | -361.234 | 0.6663019 | 0 | 0.039968784  | 0 | 0           |
| cov5_6     | 12.2047 | -361.252 | 0.6660238 | 0 | 0            | 0 | 0           |

|            |         |          |           |   |              |   |             |
|------------|---------|----------|-----------|---|--------------|---|-------------|
| cov1_5     | 12.2337 | -361.266 | 0.666264  | 0 | 0.099775998  | 0 | 0           |
| cov1_4_9   | 12.4347 | -357.969 | 0.6594409 | 0 | -0.18439968  | 0 | 0           |
| cov5_11    | 12.6333 | -361.466 | 0.6661846 | 0 | 0            | 0 | 0           |
| cov2_3_7   | 12.7264 | -358.115 | 0.6434028 | 0 | 0            | 0 | 0.14868216  |
| cov2_3_8   | 12.7623 | -358.133 | 0.6435449 | 0 | 0            | 0 | 0.14933282  |
| cov1_4_10  | 12.795  | -358.149 | 0.6611078 | 0 | -0.17620886  | 0 | 0           |
| cov1_2_3   | 12.8419 | -358.173 | 0.6430154 | 0 | -0.051957903 | 0 | 0.20031182  |
| cov2_3_11  | 12.8827 | -358.193 | 0.646491  | 0 | 0            | 0 | 0.17523411  |
| cov2_3_6   | 12.9188 | -358.211 | 0.6440418 | 0 | 0            | 0 | 0.17806173  |
| cov4_6_9   | 12.9239 | -358.214 | 0.6632591 | 0 | 0            | 0 | 0           |
| cov2_3_4   | 12.9376 | -358.221 | 0.6463181 | 0 | 0            | 0 | 0.1375102   |
| cov4_9_11  | 13.0428 | -358.273 | 0.6704138 | 0 | 0            | 0 | 0           |
| cov3_4_7   | 13.0578 | -358.281 | 0.6493184 | 0 | 0            | 0 | 0           |
| cov1_4_5   | 13.0683 | -358.286 | 0.6555772 | 0 | 0.11831559   | 0 | 0           |
| cov2_7_9   | 13.1115 | -358.308 | 0.6483819 | 0 | 0            | 0 | 0.086175722 |
| cov3_4_8   | 13.1236 | -358.314 | 0.6494505 | 0 | 0            | 0 | 0           |
| cov2_8_9   | 13.2366 | -358.37  | 0.6487445 | 0 | 0            | 0 | 0.086313965 |
| cov4_5_6   | 13.2453 | -358.375 | 0.6549853 | 0 | 0            | 0 | 0           |
| cov4_6_10  | 13.25   | -358.377 | 0.6646031 | 0 | 0            | 0 | 0           |
| cov1_4_7   | 13.2767 | -358.39  | 0.6504514 | 0 | -0.044946829 | 0 | 0           |
| cov1_3_5   | 13.2768 | -358.39  | 0.6394846 | 0 | 0.29945226   | 0 | 0           |
| cov2_7_10  | 13.3069 | -358.405 | 0.6489982 | 0 | 0            | 0 | 0.090856249 |
| cov4_7_8   | 13.3133 | -358.409 | 0.6519565 | 0 | 0            | 0 | 0           |
| cov4_10_11 | 13.3262 | -358.415 | 0.6712971 | 0 | 0            | 0 | 0           |
| cov4_6_7   | 13.341  | -358.422 | 0.6509918 | 0 | 0            | 0 | 0           |
| cov4_7_11  | 13.3576 | -358.431 | 0.6531929 | 0 | 0            | 0 | 0           |
| cov1_4_8   | 13.381  | -358.442 | 0.6507273 | 0 | -0.045315544 | 0 | 0           |
| cov2_4_7   | 13.3846 | -358.444 | 0.6513603 | 0 | 0            | 0 | 0.026183146 |
| cov2_8_10  | 13.4319 | -358.468 | 0.6493515 | 0 | 0            | 0 | 0.090994195 |
| cov4_6_8   | 13.442  | -358.473 | 0.6512438 | 0 | 0            | 0 | 0           |
| cov4_8_11  | 13.4586 | -358.481 | 0.653539  | 0 | 0            | 0 | 0           |
| cov2_4_8   | 13.4934 | -358.499 | 0.6516697 | 0 | 0            | 0 | 0.025523354 |
| cov2_4_5   | 13.5519 | -358.528 | 0.6544388 | 0 | 0            | 0 | 0.039329989 |
| cov5_7_9   | 13.5875 | -358.546 | 0.6503611 | 0 | 0            | 0 | 0           |
| cov4_5_11  | 13.6378 | -358.571 | 0.6552185 | 0 | 0            | 0 | 0           |
| cov5_8_9   | 13.714  | -358.609 | 0.6507292 | 0 | 0            | 0 | 0           |
| cov3_4_6   | 13.7265 | -358.615 | 0.6521701 | 0 | 0            | 0 | 0           |
| cov2_4_9   | 13.7425 | -358.623 | 0.6681173 | 0 | 0            | 0 | -0.1140194  |
| cov1_3_4   | 13.752  | -358.628 | 0.6521471 | 0 | 0.02552868   | 0 | 0           |
| cov3_4_11  | 13.7917 | -358.648 | 0.6522107 | 0 | 0            | 0 | 0           |
| cov5_7_10  | 13.8462 | -358.675 | 0.6512559 | 0 | 0            | 0 | 0           |
| cov7_9_10  | 13.867  | -358.685 | 0.6435869 | 0 | 0            | 0 | 0           |
| cov1_7_9   | 13.9246 | -358.714 | 0.6488373 | 0 | 0.037141288  | 0 | 0           |
| cov6_7_9   | 13.9379 | -358.721 | 0.6485096 | 0 | 0            | 0 | 0           |
| cov5_8_10  | 13.9727 | -358.738 | 0.6516207 | 0 | 0            | 0 | 0           |
| cov7_8_9   | 13.9827 | -358.743 | 0.6461075 | 0 | 0            | 0 | 0           |
| cov8_9_10  | 13.9948 | -358.749 | 0.643973  | 0 | 0            | 0 | 0           |

|             |         |          |           |   |              |             |
|-------------|---------|----------|-----------|---|--------------|-------------|
| cov7_9_11   | 14.0031 | -358.753 | 0.6457358 | 0 | 0            | 0           |
| cov1_2_7    | 14.0105 | -358.757 | 0.6436398 | 0 | -0.073061636 | 0.18741934  |
| cov2_4_10   | 14.0187 | -358.761 | 0.6691042 | 0 | 0            | -0.10715373 |
| cov1_8_9    | 14.0511 | -358.777 | 0.6492259 | 0 | 0.037326167  | 0           |
| cov6_8_9    | 14.0699 | -358.787 | 0.6488709 | 0 | 0            | 0           |
| cov2_6_7    | 14.1311 | -358.817 | 0.6452756 | 0 | 0            | 0.16192796  |
| cov2_7_8    | 14.1325 | -358.818 | 0.6475621 | 0 | 0            | 0.1252708   |
| cov1_2_8    | 14.134  | -358.819 | 0.6439683 | 0 | -0.072892176 | 0.18737063  |
| cov8_9_11   | 14.1359 | -358.82  | 0.6461288 | 0 | 0            | 0           |
| cov2_5_7    | 14.1426 | -358.823 | 0.6451827 | 0 | 0            | 0.15360933  |
| cov3_5_6    | 14.1456 | -358.825 | 0.6446287 | 0 | 0            | 0           |
| cov2_7_11   | 14.1479 | -358.826 | 0.6486674 | 0 | 0            | 0.1475998   |
| cov1_7_10   | 14.18   | -358.842 | 0.6498542 | 0 | 0.042874193  | 0           |
| cov4_9_10   | 14.1936 | -358.849 | 0.6651826 | 0 | 0            | 0           |
| cov6_7_10   | 14.1972 | -358.85  | 0.6494945 | 0 | 0            | 0           |
| cov2_6_8    | 14.2474 | -358.876 | 0.6455195 | 0 | 0            | 0.16297711  |
| cov2_8_11   | 14.264  | -358.884 | 0.6490193 | 0 | 0            | 0.1484157   |
| cov2_5_8    | 14.2653 | -358.885 | 0.6455084 | 0 | 0            | 0.15367024  |
| cov7_10_11  | 14.2839 | -358.894 | 0.6463455 | 0 | 0            | 0           |
| cov1_3_7    | 14.2862 | -358.895 | 0.6466685 | 0 | 0.10917605   | 0           |
| cov7_8_10   | 14.3024 | -358.903 | 0.6467829 | 0 | 0            | 0           |
| cov1_8_10   | 14.3063 | -358.905 | 0.6502273 | 0 | 0.0430583    | 0           |
| cov1_3_8    | 14.3285 | -358.916 | 0.6468247 | 0 | 0.1098749    | 0           |
| cov6_8_10   | 14.3299 | -358.917 | 0.6498566 | 0 | 0            | 0           |
| cov3_6_7    | 14.3512 | -358.927 | 0.6467268 | 0 | 0            | 0           |
| cov3_4_5_9  | 14.379  | -355.544 | 0.6364391 | 0 | 0            | 0           |
| cov3_6_8    | 14.4006 | -358.952 | 0.6469065 | 0 | 0            | 0           |
| cov8_10_11  | 14.4177 | -358.961 | 0.6467253 | 0 | 0            | 0           |
| cov1_3_6    | 14.5481 | -359.026 | 0.6492006 | 0 | 0.073439398  | 0           |
| cov1_3_11   | 14.5964 | -359.05  | 0.6495255 | 0 | 0.12504503   | 0           |
| cov3_6_11   | 14.6726 | -359.088 | 0.6489385 | 0 | 0            | 0           |
| cov3_4_5_10 | 14.7115 | -355.71  | 0.6381465 | 0 | 0            | 0           |
| cov3_7_11   | 15.0006 | -359.252 | 0.6376574 | 0 | 0            | 0           |
| cov3_8_11   | 15.0641 | -359.284 | 0.6377728 | 0 | 0            | 0           |
| cov3_5_7    | 15.3256 | -359.415 | 0.6460317 | 0 | 0            | 0           |
| cov3_5_8    | 15.3985 | -359.451 | 0.6461349 | 0 | 0            | 0           |
| cov1_7_8    | 15.452  | -359.478 | 0.6504755 | 0 | 0.0868697    | 0           |
| cov6_7_8    | 15.4607 | -359.482 | 0.650263  | 0 | 0            | 0           |
| cov1_6_7    | 15.5287 | -359.516 | 0.6504652 | 0 | 0.050769968  | 0           |
| cov1_5_7    | 15.5609 | -359.532 | 0.6504226 | 0 | 0.080389059  | 0           |
| cov5_6_7    | 15.5617 | -359.533 | 0.6504668 | 0 | 0            | 0           |
| cov1_7_11   | 15.5629 | -359.533 | 0.6504629 | 0 | 0.088139689  | 0           |
| cov6_7_11   | 15.5859 | -359.545 | 0.6497161 | 0 | 0            | 0           |
| cov3_5_11   | 15.6459 | -359.575 | 0.6406394 | 0 | 0            | 0           |
| cov1_6_8    | 15.6567 | -359.58  | 0.6507938 | 0 | 0.053966155  | 0           |
| cov1_5_8    | 15.6835 | -359.594 | 0.6507458 | 0 | 0.080596358  | 0           |
| cov1_8_11   | 15.6848 | -359.594 | 0.6508984 | 0 | 0.08946542   | 0           |

|              |         |          |           |   |              |   |             |
|--------------|---------|----------|-----------|---|--------------|---|-------------|
| cov5_6_8     | 15.6949 | -359.599 | 0.6507999 | 0 | 0            | 0 | 0           |
| cov2_4_11    | 15.7048 | -359.604 | 0.6676366 | 0 | 0            | 0 | 0.056984309 |
| cov5_7_8     | 15.7165 | -359.61  | 0.6498727 | 0 | 0            | 0 | 0           |
| cov6_8_11    | 15.7222 | -359.613 | 0.6500866 | 0 | 0            | 0 | 0           |
| cov2_9_11    | 15.7286 | -359.616 | 0.666074  | 0 | 0            | 0 | 0.14159855  |
| cov1_3_4_5   | 15.7299 | -356.22  | 0.6355794 | 0 | 0.28834588   | 0 | 0           |
| cov5_7_11    | 15.7578 | -359.631 | 0.6479272 | 0 | 0            | 0 | 0           |
| cov1_2_4     | 15.8274 | -359.666 | 0.6605709 | 0 | -0.10581839  | 0 | 0.082470422 |
| cov1_4_11    | 15.8491 | -359.676 | 0.6670228 | 0 | -0.014086462 | 0 | 0           |
| cov4_6_11    | 15.856  | -359.68  | 0.6680054 | 0 | 0            | 0 | 0           |
| cov5_8_11    | 15.8867 | -359.695 | 0.648317  | 0 | 0            | 0 | 0           |
| cov1_2_9     | 15.91   | -359.707 | 0.6594194 | 0 | -0.10350811  | 0 | 0.17104288  |
| cov7_8_11    | 15.9525 | -359.728 | 0.6430969 | 0 | 0            | 0 | 0           |
| cov2_10_11   | 15.9661 | -359.735 | 0.6666601 | 0 | 0            | 0 | 0.14568113  |
| cov3_7_8     | 15.9766 | -359.74  | 0.6394032 | 0 | 0            | 0 | 0           |
| cov1_3_4_9   | 16.0426 | -356.376 | 0.6420091 | 0 | -0.10295052  | 0 | 0           |
| cov1_4_6     | 16.0438 | -359.774 | 0.6633452 | 0 | -0.081564894 | 0 | 0           |
| cov2_4_6     | 16.0852 | -359.794 | 0.6631046 | 0 | 0            | 0 | 0.049573566 |
| cov2_6_9     | 16.1099 | -359.807 | 0.6619416 | 0 | 0            | 0 | 0.13994839  |
| cov3_4_6_9   | 16.1486 | -356.429 | 0.6426741 | 0 | 0            | 0 | 0           |
| cov1_2_10    | 16.1623 | -359.833 | 0.6603482 | 0 | -0.098940942 | 0 | 0.17252537  |
| cov2_9_10    | 16.1777 | -359.841 | 0.6622966 | 0 | 0            | 0 | 0.085308192 |
| cov2_3_5_9   | 16.3134 | -356.511 | 0.6321854 | 0 | 0            | 0 | 0.18029988  |
| cov2_6_10    | 16.3514 | -359.928 | 0.6627307 | 0 | 0            | 0 | 0.14207287  |
| cov2_5_9     | 16.3568 | -359.93  | 0.6638305 | 0 | 0            | 0 | 0.098194915 |
| cov1_3_4_10  | 16.401  | -356.555 | 0.6438797 | 0 | -0.095206387 | 0 | 0           |
| cov3_4_9_11  | 16.4149 | -356.562 | 0.6467228 | 0 | 0            | 0 | 0           |
| cov4_5_7_9   | 16.4876 | -356.598 | 0.646147  | 0 | 0            | 0 | 0           |
| cov3_4_6_10  | 16.4918 | -356.6   | 0.6444235 | 0 | 0            | 0 | 0           |
| cov3_4_9_10  | 16.4958 | -356.602 | 0.6428815 | 0 | 0            | 0 | 0           |
| cov1_2_3_9   | 16.5166 | -356.613 | 0.6349837 | 0 | -0.097711389 | 0 | 0.17645865  |
| cov5_9_11    | 16.5257 | -360.015 | 0.6700498 | 0 | 0            | 0 | 0           |
| cov3_4_7_9   | 16.5397 | -356.624 | 0.6438634 | 0 | 0            | 0 | 0           |
| cov3_4_8_9   | 16.5512 | -356.63  | 0.6439146 | 0 | 0            | 0 | 0           |
| cov2_3_4_9   | 16.5593 | -356.634 | 0.6437213 | 0 | 0            | 0 | 0.012826685 |
| cov2_5_10    | 16.5682 | -360.036 | 0.6643122 | 0 | 0            | 0 | 0.10434344  |
| cov2_3_5_10  | 16.5731 | -356.641 | 0.6333907 | 0 | 0            | 0 | 0.18567272  |
| cov4_5_8_9   | 16.5771 | -356.643 | 0.6464461 | 0 | 0            | 0 | 0           |
| cov2_3_6_9   | 16.6279 | -356.669 | 0.6361894 | 0 | 0            | 0 | 0.1535394   |
| cov1_5_9     | 16.7229 | -360.113 | 0.6659154 | 0 | -0.084775757 | 0 | 0           |
| cov5_9_10    | 16.7235 | -360.114 | 0.6646909 | 0 | 0            | 0 | 0           |
| cov3_4_10_11 | 16.7237 | -356.716 | 0.6480368 | 0 | 0            | 0 | 0           |
| cov4_5_7_10  | 16.7279 | -356.719 | 0.6471064 | 0 | 0            | 0 | 0           |
| cov3_4_5_6   | 16.7951 | -356.752 | 0.639485  | 0 | 0            | 0 | 0           |
| cov4_5_8_10  | 16.8175 | -356.763 | 0.6474019 | 0 | 0            | 0 | 0           |
| cov1_2_3_10  | 16.8177 | -356.763 | 0.6366262 | 0 | -0.092938456 | 0 | 0.17777168  |
| cov3_4_7_10  | 16.8194 | -356.764 | 0.6453096 | 0 | 0            | 0 | 0           |

|              |         |          |           |   |              |   |             |
|--------------|---------|----------|-----------|---|--------------|---|-------------|
| cov2_3_9_11  | 16.827  | -356.768 | 0.6409357 | 0 | 0            | 0 | 0.118155    |
| cov3_4_8_10  | 16.8325 | -356.771 | 0.6453597 | 0 | 0            | 0 | 0           |
| cov2_3_9_10  | 16.8359 | -356.773 | 0.6383193 | 0 | 0            | 0 | 0.096031353 |
| cov2_3_4_10  | 16.8377 | -356.773 | 0.6450152 | 0 | 0            | 0 | 0.0193469   |
| cov5_6_9     | 16.8469 | -360.175 | 0.6667988 | 0 | 0            | 0 | 0           |
| cov5_10_11   | 16.8478 | -360.176 | 0.6708813 | 0 | 0            | 0 | 0           |
| cov2_3_8_9   | 16.9182 | -356.814 | 0.6396364 | 0 | 0            | 0 | 0.0975839   |
| cov1_4_7_9   | 16.919  | -356.814 | 0.6464092 | 0 | -0.16439888  | 0 | 0           |
| cov2_3_6_10  | 16.9208 | -356.815 | 0.6377382 | 0 | 0            | 0 | 0.15571751  |
| cov2_3_7_9   | 16.9208 | -356.815 | 0.6395491 | 0 | 0            | 0 | 0.097363384 |
| cov1_9_11    | 16.9693 | -360.237 | 0.6688929 | 0 | 0.082606816  | 0 | 0           |
| cov6_9_10    | 16.9709 | -360.237 | 0.6632901 | 0 | 0            | 0 | 0           |
| cov1_9_10    | 16.9833 | -360.244 | 0.6635973 | 0 | 0.036023386  | 0 | 0           |
| cov6_9_11    | 16.993  | -360.248 | 0.6677557 | 0 | 0            | 0 | 0           |
| cov1_4_8_9   | 17.0212 | -356.865 | 0.6467407 | 0 | -0.16484957  | 0 | 0           |
| cov1_5_10    | 17.0615 | -360.283 | 0.6672011 | 0 | -0.070396501 | 0 | 0           |
| cov2_3_10_11 | 17.101  | -356.905 | 0.6421341 | 0 | 0            | 0 | 0.12199069  |
| cov2_5_11    | 17.1238 | -360.314 | 0.6629355 | 0 | 0            | 0 | 0.19045403  |
| cov1_2_11    | 17.1329 | -360.318 | 0.6629955 | 0 | -0.020775663 | 0 | 0.19288884  |
| cov2_6_11    | 17.1446 | -360.324 | 0.6645419 | 0 | 0            | 0 | 0.17555802  |
| cov9_10_11   | 17.1536 | -360.329 | 0.6614113 | 0 | 0            | 0 | 0           |
| cov5_6_10    | 17.1539 | -360.329 | 0.6678242 | 0 | 0            | 0 | 0           |
| cov2_3_4_5   | 17.1608 | -356.935 | 0.6351586 | 0 | 0            | 0 | 0.16580706  |
| cov1_6_9     | 17.1795 | -360.342 | 0.665885  | 0 | 0.015127275  | 0 | 0           |
| cov2_3_8_10  | 17.1835 | -356.946 | 0.6409187 | 0 | 0            | 0 | 0.10240417  |
| cov2_3_7_10  | 17.185  | -356.947 | 0.6408337 | 0 | 0            | 0 | 0.10217122  |
| cov4_6_7_9   | 17.2421 | -356.976 | 0.6490324 | 0 | 0            | 0 | 0           |
| cov1_10_11   | 17.2468 | -360.375 | 0.6698507 | 0 | 0.08841336   | 0 | 0           |
| cov1_4_7_10  | 17.2526 | -356.981 | 0.6479994 | 0 | -0.15635136  | 0 | 0           |
| cov6_10_11   | 17.2756 | -360.39  | 0.6686524 | 0 | 0            | 0 | 0           |
| cov4_6_8_9   | 17.3299 | -357.02  | 0.6492965 | 0 | 0            | 0 | 0           |
| cov1_4_8_10  | 17.355  | -357.032 | 0.6483293 | 0 | -0.15679685  | 0 | 0           |
| cov1_2_6     | 17.4404 | -360.472 | 0.6590195 | 0 | -0.093345738 | 0 | 0.18660172  |
| cov1_2_5     | 17.4449 | -360.474 | 0.6588188 | 0 | -0.055671676 | 0 | 0.18929867  |
| cov1_6_10    | 17.4527 | -360.478 | 0.6668548 | 0 | 0.019120451  | 0 | 0           |
| cov2_5_6     | 17.5151 | -360.509 | 0.6598017 | 0 | 0            | 0 | 0.16950438  |
| cov4_6_7_10  | 17.5489 | -357.129 | 0.6503551 | 0 | 0            | 0 | 0           |
| cov4_6_8_10  | 17.6376 | -357.173 | 0.6506274 | 0 | 0            | 0 | 0           |
| cov1_3_5_9   | 17.7653 | -357.237 | 0.6374451 | 0 | 0.11296235   | 0 | 0           |
| cov1_3_9_10  | 17.7717 | -357.24  | 0.6378739 | 0 | 0.046827216  | 0 | 0           |
| cov3_6_9_10  | 17.8119 | -357.261 | 0.6375177 | 0 | 0            | 0 | 0           |
| cov3_4_5_11  | 17.8479 | -357.279 | 0.6360347 | 0 | 0            | 0 | 0           |
| cov1_3_9_11  | 17.8673 | -357.288 | 0.6385851 | 0 | 0.042148696  | 0 | 0           |
| cov1_3_7_9   | 17.8711 | -357.29  | 0.63914   | 0 | 0.048304468  | 0 | 0           |
| cov1_3_6_9   | 17.8712 | -357.29  | 0.63925   | 0 | 0.0445903    | 0 | 0           |
| cov1_3_8_9   | 17.8714 | -357.29  | 0.6392219 | 0 | 0.048543785  | 0 | 0           |
| cov3_9_10_11 | 17.8727 | -357.291 | 0.6336377 | 0 | 0            | 0 | 0           |

|              |         |          |           |   |              |   |              |
|--------------|---------|----------|-----------|---|--------------|---|--------------|
| cov4_7_9_11  | 17.8925 | -357.301 | 0.6563118 | 0 | 0            | 0 | 0            |
| cov3_6_9_11  | 17.8995 | -357.304 | 0.6377772 | 0 | 0            | 0 | 0            |
| cov3_5_6_9   | 17.9042 | -357.307 | 0.6383197 | 0 | 0            | 0 | 0            |
| cov3_6_7_9   | 17.9157 | -357.312 | 0.6387905 | 0 | 0            | 0 | 0            |
| cov3_6_8_9   | 17.9163 | -357.313 | 0.6388713 | 0 | 0            | 0 | 0            |
| cov3_5_9_10  | 17.9357 | -357.322 | 0.636986  | 0 | 0            | 0 | 0            |
| cov3_7_9_11  | 17.9652 | -357.337 | 0.6346814 | 0 | 0            | 0 | 0            |
| cov3_5_9_11  | 17.9671 | -357.338 | 0.635819  | 0 | 0            | 0 | 0            |
| cov3_8_9_11  | 17.9709 | -357.34  | 0.6347462 | 0 | 0            | 0 | 0            |
| cov4_8_9_11  | 17.9862 | -357.348 | 0.6567046 | 0 | 0            | 0 | 0            |
| cov3_7_8_9   | 18.01   | -357.36  | 0.6350418 | 0 | 0            | 0 | 0            |
| cov3_4_5_7   | 18.0196 | -357.364 | 0.6426186 | 0 | 0            | 0 | 0            |
| cov3_5_7_9   | 18.0234 | -357.366 | 0.6383863 | 0 | 0            | 0 | 0            |
| cov3_5_8_9   | 18.0318 | -357.37  | 0.6383782 | 0 | 0            | 0 | 0            |
| cov2_4_5_9   | 18.0442 | -357.377 | 0.658675  | 0 | 0            | 0 | -0.075434382 |
| cov3_7_9_10  | 18.049  | -357.379 | 0.6336344 | 0 | 0            | 0 | 0            |
| cov1_4_5_7   | 18.0503 | -357.38  | 0.6457318 | 0 | 0.10130254   | 0 | 0            |
| cov3_8_9_10  | 18.0542 | -357.382 | 0.633715  | 0 | 0            | 0 | 0            |
| cov1_3_5_10  | 18.0618 | -357.385 | 0.6387364 | 0 | 0.12657239   | 0 | 0            |
| cov3_4_5_8   | 18.0648 | -357.387 | 0.6427243 | 0 | 0            | 0 | 0            |
| cov2_4_7_9   | 18.0846 | -357.397 | 0.6538857 | 0 | 0            | 0 | -0.084041451 |
| cov4_5_9_10  | 18.1117 | -357.41  | 0.6543772 | 0 | 0            | 0 | 0            |
| cov4_5_9_11  | 18.1207 | -357.415 | 0.6594801 | 0 | 0            | 0 | 0            |
| cov1_2_3_5   | 18.1312 | -357.42  | 0.632506  | 0 | 0.13298277   | 0 | 0.21089966   |
| cov1_4_5_8   | 18.1356 | -357.422 | 0.6459896 | 0 | 0.10162193   | 0 | 0            |
| cov4_7_10_11 | 18.1416 | -357.425 | 0.6570613 | 0 | 0            | 0 | 0            |
| cov2_4_8_9   | 18.189  | -357.449 | 0.6542355 | 0 | 0            | 0 | -0.084841729 |
| cov1_3_10_11 | 18.1903 | -357.45  | 0.640188  | 0 | 0.047826261  | 0 | 0            |
| cov1_3_7_10  | 18.1937 | -357.451 | 0.6407292 | 0 | 0.054224004  | 0 | 0            |
| cov4_5_6_7   | 18.194  | -357.452 | 0.6453445 | 0 | 0            | 0 | 0            |
| cov1_3_6_10  | 18.1943 | -357.452 | 0.6408551 | 0 | 0.049027947  | 0 | 0            |
| cov1_3_8_10  | 18.1951 | -357.452 | 0.6408279 | 0 | 0.054475365  | 0 | 0            |
| cov3_6_10_11 | 18.2296 | -357.469 | 0.6393448 | 0 | 0            | 0 | 0            |
| cov3_5_6_10  | 18.2329 | -357.471 | 0.6398654 | 0 | 0            | 0 | 0            |
| cov4_8_10_11 | 18.236  | -357.473 | 0.6574527 | 0 | 0            | 0 | 0            |
| cov3_6_7_10  | 18.2472 | -357.478 | 0.6403945 | 0 | 0            | 0 | 0            |
| cov4_5_6_9   | 18.2488 | -357.479 | 0.6571076 | 0 | 0            | 0 | 0            |
| cov3_6_8_10  | 18.2491 | -357.479 | 0.6404921 | 0 | 0            | 0 | 0            |
| cov1_4_5_9   | 18.2523 | -357.481 | 0.6566797 | 0 | -0.038295198 | 0 | 0            |
| cov4_7_9_10  | 18.2536 | -357.481 | 0.6507318 | 0 | 0            | 0 | 0            |
| cov4_7_8_9   | 18.2675 | -357.488 | 0.6528259 | 0 | 0            | 0 | 0            |
| cov2_3_5_6   | 18.2741 | -357.492 | 0.6335438 | 0 | 0            | 0 | 0.23137207   |
| cov4_5_6_8   | 18.2881 | -357.499 | 0.6456211 | 0 | 0            | 0 | 0            |
| cov2_4_5_7   | 18.3148 | -357.512 | 0.6438085 | 0 | 0            | 0 | 0.051402571  |
| cov3_7_10_11 | 18.3151 | -357.512 | 0.6358129 | 0 | 0            | 0 | 0            |
| cov3_5_10_11 | 18.3187 | -357.514 | 0.6371849 | 0 | 0            | 0 | 0            |
| cov3_8_10_11 | 18.3226 | -357.516 | 0.6358829 | 0 | 0            | 0 | 0            |



|              |         |          |           |   |              |   |              |
|--------------|---------|----------|-----------|---|--------------|---|--------------|
| cov2_4_7_10  | 18.3359 | -357.523 | 0.6547803 | 0 | 0            | 0 | -0.077041073 |
| cov2_4_5_10  | 18.347  | -357.528 | 0.6596538 | 0 | 0            | 0 | -0.06792108  |
| cov4_5_7_8   | 18.347  | -357.528 | 0.6455119 | 0 | 0            | 0 | 0            |
| cov4_5_7_11  | 18.3617 | -357.535 | 0.6428935 | 0 | 0            | 0 | 0            |
| cov4_8_9_10  | 18.3639 | -357.537 | 0.6510667 | 0 | 0            | 0 | 0            |
| cov3_5_7_10  | 18.3842 | -357.547 | 0.6400056 | 0 | 0            | 0 | 0            |
| cov3_5_8_10  | 18.3948 | -357.552 | 0.6400198 | 0 | 0            | 0 | 0            |
| cov4_5_10_11 | 18.4025 | -357.556 | 0.6602617 | 0 | 0            | 0 | 0            |
| cov2_4_5_8   | 18.4055 | -357.557 | 0.6440813 | 0 | 0            | 0 | 0.050910843  |
| cov3_7_8_10  | 18.4174 | -357.563 | 0.6362434 | 0 | 0            | 0 | 0            |
| cov2_4_8_10  | 18.4406 | -357.575 | 0.6551277 | 0 | 0            | 0 | -0.077838854 |
| cov4_5_8_11  | 18.4549 | -357.582 | 0.6432174 | 0 | 0            | 0 | 0            |
| cov2_3_5_11  | 18.4609 | -357.585 | 0.6310698 | 0 | 0            | 0 | 0.25719495   |
| cov4_7_8_10  | 18.4711 | -357.59  | 0.6536455 | 0 | 0            | 0 | 0            |
| cov2_3_5_7   | 18.5088 | -357.609 | 0.6333766 | 0 | 0            | 0 | 0.26007187   |
| cov2_3_5_8   | 18.5129 | -357.611 | 0.6333687 | 0 | 0            | 0 | 0.26232631   |
| cov4_5_6_10  | 18.5249 | -357.617 | 0.6580773 | 0 | 0            | 0 | 0            |
| cov1_4_5_10  | 18.531  | -357.62  | 0.6578084 | 0 | -0.023903594 | 0 | 0            |
| cov1_6_11    | 18.6741 | -361.089 | 0.6698006 | 0 | 0.079161466  | 0 | 0            |
| cov1_5_11    | 18.7725 | -361.138 | 0.6695167 | 0 | 0.14548078   | 0 | 0            |
| cov5_6_11    | 18.7896 | -361.147 | 0.6688023 | 0 | 0            | 0 | 0            |
| cov1_5_6     | 18.9576 | -361.231 | 0.6662076 | 0 | 0.049785277  | 0 | 0            |
| cov1_4_9_11  | 19.0655 | -357.887 | 0.66253   | 0 | -0.14530577  | 0 | 0            |
| cov1_4_9_10  | 19.1102 | -357.91  | 0.6576325 | 0 | -0.18423374  | 0 | 0            |
| cov1_4_6_9   | 19.2119 | -357.961 | 0.6597018 | 0 | -0.16062604  | 0 | 0            |
| cov1_2_4_9   | 19.2276 | -357.968 | 0.6596457 | 0 | -0.18094206  | 0 | -0.007303271 |
| cov4_6_9_11  | 19.3594 | -358.034 | 0.6665063 | 0 | 0            | 0 | 0            |
| cov1_2_3_7   | 19.3782 | -358.044 | 0.6408237 | 0 | -0.057423327 | 0 | 0.19704132   |
| cov2_3_7_8   | 19.3844 | -358.047 | 0.6434712 | 0 | 0            | 0 | 0.14893057   |
| cov1_2_3_8   | 19.4166 | -358.063 | 0.6410005 | 0 | -0.056933287 | 0 | 0.19728999   |
| cov2_3_4_7   | 19.4208 | -358.065 | 0.6456797 | 0 | 0            | 0 | 0.1048485    |
| cov1_4_10_11 | 19.4284 | -358.069 | 0.6641373 | 0 | -0.13736673  | 0 | 0            |
| cov1_2_7_9   | 19.4415 | -358.075 | 0.6428857 | 0 | -0.10431676  | 0 | 0.17070083   |
| cov2_3_6_7   | 19.4634 | -358.086 | 0.6419614 | 0 | 0            | 0 | 0.17459848   |
| cov2_3_4_8   | 19.4651 | -358.087 | 0.6457192 | 0 | 0            | 0 | 0.10736995   |
| cov2_3_7_11  | 19.4722 | -358.091 | 0.6445125 | 0 | 0            | 0 | 0.16439756   |
| cov2_3_6_8   | 19.4994 | -358.104 | 0.642103  | 0 | 0            | 0 | 0.17522268   |
| cov2_3_8_11  | 19.5059 | -358.108 | 0.6446864 | 0 | 0            | 0 | 0.16540589   |
| cov1_2_8_9   | 19.5685 | -358.139 | 0.6432696 | 0 | -0.10411234  | 0 | 0.1706753    |
| cov1_4_6_10  | 19.5749 | -358.142 | 0.6613521 | 0 | -0.15441533  | 0 | 0            |
| cov1_2_3_4   | 19.5814 | -358.145 | 0.6445574 | 0 | -0.060573118 | 0 | 0.17698157   |
| cov1_2_4_10  | 19.5891 | -358.149 | 0.6612072 | 0 | -0.17449851  | 0 | -0.0036174   |
| cov2_6_7_9   | 19.5978 | -358.153 | 0.6449634 | 0 | 0            | 0 | 0.1439215    |
| cov4_6_9_10  | 19.605  | -358.157 | 0.66151   | 0 | 0            | 0 | 0            |
| cov1_2_3_11  | 19.6218 | -358.165 | 0.6441296 | 0 | -0.041294061 | 0 | 0.20092962   |
| cov1_2_3_6   | 19.6273 | -358.168 | 0.6431276 | 0 | -0.069247116 | 0 | 0.19879412   |
| cov2_3_4_11  | 19.6387 | -358.174 | 0.6482324 | 0 | 0            | 0 | 0.15228534   |

|              |         |          |           |   |              |   |              |
|--------------|---------|----------|-----------|---|--------------|---|--------------|
| cov2_4_6_9   | 19.6512 | -358.18  | 0.6640296 | 0 | 0            | 0 | -0.04369494  |
| cov2_3_6_11  | 19.6698 | -358.189 | 0.6457463 | 0 | 0            | 0 | 0.18281682   |
| cov1_2_7_10  | 19.6733 | -358.191 | 0.643847  | 0 | -0.099958075 | 0 | 0.17218592   |
| cov2_3_4_6   | 19.6769 | -358.193 | 0.6453868 | 0 | 0            | 0 | 0.15756198   |
| cov4_6_10_11 | 19.6972 | -358.203 | 0.6677915 | 0 | 0            | 0 | 0            |
| cov4_9_10_11 | 19.6993 | -358.204 | 0.6685365 | 0 | 0            | 0 | 0            |
| cov2_4_9_11  | 19.7003 | -358.205 | 0.6704445 | 0 | 0            | 0 | -0.059877409 |
| cov2_7_9_10  | 19.7094 | -358.209 | 0.6460899 | 0 | 0            | 0 | 0.084454323  |
| cov2_6_8_9   | 19.7131 | -358.211 | 0.6452479 | 0 | 0            | 0 | 0.14494621   |
| cov1_4_5_11  | 19.7221 | -358.216 | 0.6582248 | 0 | 0.15220973   | 0 | 0            |
| cov1_2_4_5   | 19.7251 | -358.217 | 0.6577763 | 0 | 0.17981816   | 0 | -0.071386715 |
| cov3_4_7_8   | 19.7297 | -358.219 | 0.6493871 | 0 | 0            | 0 | 0            |
| cov1_2_4_7   | 19.7315 | -358.22  | 0.6466758 | 0 | -0.10262882  | 0 | 0.10003775   |
| cov2_7_9_11  | 19.7517 | -358.23  | 0.6498563 | 0 | 0            | 0 | 0.11353334   |
| cov2_7_8_9   | 19.7853 | -358.247 | 0.6484873 | 0 | 0            | 0 | 0.086496122  |
| cov1_2_8_10  | 19.8001 | -358.255 | 0.6442226 | 0 | -0.099750175 | 0 | 0.17216327   |
| cov2_6_7_10  | 19.8215 | -358.265 | 0.6458098 | 0 | 0            | 0 | 0.14603026   |
| cov2_8_9_10  | 19.8341 | -358.272 | 0.6464445 | 0 | 0            | 0 | 0.084589373  |
| cov1_2_4_8   | 19.8401 | -358.275 | 0.6469877 | 0 | -0.10265904  | 0 | 0.099412106  |
| cov1_3_4_7   | 19.8446 | -358.277 | 0.6491938 | 0 | -0.011946897 | 0 | 0            |
| cov3_4_7_11  | 19.8501 | -358.28  | 0.6496755 | 0 | 0            | 0 | 0            |
| cov3_4_6_7   | 19.8523 | -358.281 | 0.6493125 | 0 | 0            | 0 | 0            |
| cov1_4_5_6   | 19.8581 | -358.284 | 0.6554711 | 0 | 0.1050896    | 0 | 0            |
| cov2_8_9_11  | 19.8685 | -358.289 | 0.6502532 | 0 | 0            | 0 | 0.11438499   |
| cov2_5_7_9   | 19.9025 | -358.306 | 0.6479731 | 0 | 0            | 0 | 0.092241022  |
| cov1_3_4_8   | 19.9129 | -358.311 | 0.6493502 | 0 | -0.00986364  | 0 | 0            |
| cov3_4_8_11  | 19.916  | -358.313 | 0.6497967 | 0 | 0            | 0 | 0            |
| cov3_4_6_8   | 19.9181 | -358.314 | 0.6494504 | 0 | 0            | 0 | 0            |
| cov2_4_6_7   | 19.9344 | -358.322 | 0.6486872 | 0 | 0            | 0 | 0.072195559  |
| cov2_6_8_10  | 19.9372 | -358.323 | 0.6460917 | 0 | 0            | 0 | 0.14706058   |
| cov2_7_10_11 | 19.9588 | -358.334 | 0.650432  | 0 | 0            | 0 | 0.11727961   |
| cov1_4_7_8   | 19.9605 | -358.335 | 0.6505693 | 0 | -0.044792272 | 0 | 0            |
| cov4_5_6_11  | 19.9753 | -358.342 | 0.6566743 | 0 | 0            | 0 | 0            |
| cov2_7_8_10  | 19.9815 | -358.345 | 0.649108  | 0 | 0            | 0 | 0.091175611  |
| cov2_4_6_10  | 19.9905 | -358.35  | 0.6653401 | 0 | 0            | 0 | -0.039174623 |
| cov1_3_5_6   | 20.0014 | -358.355 | 0.6399869 | 0 | 0.24951508   | 0 | 0            |
| cov2_4_10_11 | 20.0106 | -358.36  | 0.6714253 | 0 | 0            | 0 | -0.05371427  |
| cov2_5_8_9   | 20.0276 | -358.368 | 0.6483328 | 0 | 0            | 0 | 0.092376764  |
| cov4_6_7_8   | 20.0303 | -358.37  | 0.6511358 | 0 | 0            | 0 | 0            |
| cov2_4_5_6   | 20.0304 | -358.37  | 0.6554061 | 0 | 0            | 0 | -0.016088046 |
| cov2_4_7_11  | 20.0307 | -358.37  | 0.6531528 | 0 | 0            | 0 | 0.050908162  |
| cov1_3_5_8   | 20.0336 | -358.371 | 0.6391851 | 0 | 0.32579051   | 0 | 0            |
| cov2_4_6_8   | 20.0342 | -358.372 | 0.6489273 | 0 | 0            | 0 | 0.072410703  |
| cov4_7_8_11  | 20.0403 | -358.375 | 0.6533144 | 0 | 0            | 0 | 0            |
| cov1_3_5_7   | 20.0487 | -358.379 | 0.6392494 | 0 | 0.32002076   | 0 | 0            |
| cov1_3_5_11  | 20.0655 | -358.387 | 0.6387863 | 0 | 0.29391154   | 0 | 0            |
| cov1_4_6_7   | 20.0661 | -358.388 | 0.6504274 | 0 | -0.058497546 | 0 | 0            |

|              |         |          |           |   |              |   |             |
|--------------|---------|----------|-----------|---|--------------|---|-------------|
| cov2_4_7_8   | 20.0678 | -358.388 | 0.6514731 | 0 | 0            | 0 | 0.026418896 |
| cov1_4_7_11  | 20.071  | -358.39  | 0.6506233 | 0 | -0.043238782 | 0 | 0           |
| cov2_8_10_11 | 20.0758 | -358.393 | 0.6508225 | 0 | 0            | 0 | 0.11813491  |
| cov2_5_7_10  | 20.0962 | -358.403 | 0.6484853 | 0 | 0            | 0 | 0.098251086 |
| cov1_5_7_9   | 20.121  | -358.415 | 0.6487311 | 0 | -0.10229977  | 0 | 0           |
| cov4_6_7_11  | 20.1238 | -358.416 | 0.6519366 | 0 | 0            | 0 | 0           |
| cov2_4_8_11  | 20.1318 | -358.42  | 0.6535046 | 0 | 0            | 0 | 0.050912767 |
| cov1_4_6_8   | 20.1722 | -358.441 | 0.6507152 | 0 | -0.05625425  | 0 | 0           |
| cov1_4_8_11  | 20.1747 | -358.442 | 0.6510174 | 0 | -0.04249447  | 0 | 0           |
| cov5_7_9_10  | 20.1977 | -358.453 | 0.6480633 | 0 | 0            | 0 | 0           |
| cov2_5_8_10  | 20.2213 | -358.465 | 0.6488401 | 0 | 0            | 0 | 0.098391142 |
| cov4_6_8_11  | 20.2234 | -358.466 | 0.652243  | 0 | 0            | 0 | 0           |
| cov1_5_8_9   | 20.25   | -358.48  | 0.6491157 | 0 | -0.10179969  | 0 | 0           |
| cov5_6_7_9   | 20.2559 | -358.483 | 0.6496881 | 0 | 0            | 0 | 0           |
| cov5_7_8_9   | 20.262  | -358.486 | 0.6504679 | 0 | 0            | 0 | 0           |
| cov5_8_9_10  | 20.3239 | -358.517 | 0.6484147 | 0 | 0            | 0 | 0           |
| cov5_7_9_11  | 20.3346 | -358.522 | 0.6518862 | 0 | 0            | 0 | 0           |
| cov2_4_5_11  | 20.3399 | -358.525 | 0.6548847 | 0 | 0            | 0 | 0.044513253 |
| cov5_6_8_9   | 20.3752 | -358.542 | 0.6500166 | 0 | 0            | 0 | 0           |
| cov2_4_9_10  | 20.4298 | -358.569 | 0.6664375 | 0 | 0            | 0 | -0.11255691 |
| cov1_5_7_10  | 20.446  | -358.578 | 0.6500971 | 0 | -0.0882734   | 0 | 0           |
| cov5_8_9_11  | 20.4564 | -358.583 | 0.6523165 | 0 | 0            | 0 | 0           |
| cov3_4_6_11  | 20.4977 | -358.603 | 0.6535648 | 0 | 0            | 0 | 0           |
| cov1_7_9_10  | 20.502  | -358.606 | 0.646382  | 0 | 0.034936733  | 0 | 0           |
| cov6_7_9_10  | 20.5113 | -358.61  | 0.6460654 | 0 | 0            | 0 | 0           |
| cov1_3_4_6   | 20.5207 | -358.615 | 0.6521746 | 0 | -0.004381822 | 0 | 0           |
| cov5_7_8_10  | 20.5213 | -358.615 | 0.651363  | 0 | 0            | 0 | 0           |
| cov1_3_4_11  | 20.5283 | -358.619 | 0.6534183 | 0 | 0.03709382   | 0 | 0           |
| cov7_8_9_10  | 20.5396 | -358.624 | 0.6437211 | 0 | 0            | 0 | 0           |
| cov5_6_7_10  | 20.5512 | -358.63  | 0.6507969 | 0 | 0            | 0 | 0           |
| cov1_5_8_10  | 20.5747 | -358.642 | 0.6504743 | 0 | -0.087767945 | 0 | 0           |
| cov7_9_10_11 | 20.5758 | -358.643 | 0.6434271 | 0 | 0            | 0 | 0           |
| cov1_7_8_9   | 20.5977 | -358.653 | 0.6489564 | 0 | 0.037379508  | 0 | 0           |
| cov6_7_8_9   | 20.6039 | -358.657 | 0.6486846 | 0 | 0            | 0 | 0           |
| cov5_7_10_11 | 20.6067 | -358.658 | 0.6525739 | 0 | 0            | 0 | 0           |
| cov1_8_9_10  | 20.628  | -358.669 | 0.6467651 | 0 | 0.035119333  | 0 | 0           |
| cov6_8_9_10  | 20.6426 | -358.676 | 0.6464215 | 0 | 0            | 0 | 0           |
| cov5_6_8_10  | 20.6717 | -358.69  | 0.6511286 | 0 | 0            | 0 | 0           |
| cov7_8_9_11  | 20.6766 | -358.693 | 0.6458646 | 0 | 0            | 0 | 0           |
| cov1_2_7_8   | 20.6923 | -358.701 | 0.6437599 | 0 | -0.072987289 | 0 | 0.18764433  |
| cov8_9_10_11 | 20.7078 | -358.708 | 0.6438128 | 0 | 0            | 0 | 0           |
| cov1_6_7_9   | 20.7163 | -358.713 | 0.6488486 | 0 | 0.026731484  | 0 | 0           |
| cov1_7_9_11  | 20.7192 | -358.714 | 0.6487982 | 0 | 0.036694891  | 0 | 0           |
| cov5_8_10_11 | 20.7293 | -358.719 | 0.6530115 | 0 | 0            | 0 | 0           |
| cov6_7_9_11  | 20.7308 | -358.72  | 0.6482068 | 0 | 0            | 0 | 0           |
| cov1_2_7_11  | 20.8001 | -358.755 | 0.6443038 | 0 | -0.066608266 | 0 | 0.18788322  |
| cov1_2_6_7   | 20.802  | -358.756 | 0.6436716 | 0 | -0.083123801 | 0 | 0.18653111  |

|                |         |          |           |   |              |   |             |
|----------------|---------|----------|-----------|---|--------------|---|-------------|
| cov1_2_5_7     | 20.8051 | -358.757 | 0.643638  | 0 | -0.072970527 | 0 | 0.18742316  |
| cov2_6_7_8     | 20.8208 | -358.765 | 0.6454627 | 0 | 0            | 0 | 0.16088285  |
| cov2_5_7_8     | 20.8232 | -358.766 | 0.6452911 | 0 | 0            | 0 | 0.15399965  |
| cov1_3_4_5_9   | 20.8264 | -355.37  | 0.6349733 | 0 | 0.12787477   | 0 | 0           |
| cov2_7_8_11    | 20.8286 | -358.769 | 0.6487978 | 0 | 0            | 0 | 0.14794712  |
| cov1_6_8_9     | 20.8441 | -358.777 | 0.6492337 | 0 | 0.029895753  | 0 | 0           |
| cov1_8_9_11    | 20.8456 | -358.777 | 0.6493021 | 0 | 0.038161807  | 0 | 0           |
| cov1_7_8_10    | 20.8539 | -358.782 | 0.6499658 | 0 | 0.043117957  | 0 | 0           |
| cov6_7_8_10    | 20.863  | -358.786 | 0.6496494 | 0 | 0            | 0 | 0           |
| cov6_8_9_11    | 20.8633 | -358.786 | 0.6486138 | 0 | 0            | 0 | 0           |
| cov3_5_6_7     | 20.8678 | -358.788 | 0.6441571 | 0 | 0            | 0 | 0           |
| cov3_5_6_11    | 20.8818 | -358.795 | 0.6421859 | 0 | 0            | 0 | 0           |
| cov2_5_7_11    | 20.8911 | -358.8   | 0.6466094 | 0 | 0            | 0 | 0.16314954  |
| cov3_5_6_8     | 20.8941 | -358.802 | 0.6442522 | 0 | 0            | 0 | 0           |
| cov2_6_7_11    | 20.8953 | -358.802 | 0.6466495 | 0 | 0            | 0 | 0.16615716  |
| cov2_5_6_7     | 20.8975 | -358.803 | 0.6445355 | 0 | 0            | 0 | 0.16820816  |
| cov1_2_8_11    | 20.9217 | -358.815 | 0.6447503 | 0 | -0.065281738 | 0 | 0.18792126  |
| cov1_2_6_8     | 20.927  | -358.818 | 0.643994  | 0 | -0.080108909 | 0 | 0.18673351  |
| cov1_2_5_8     | 20.9286 | -358.819 | 0.6439652 | 0 | -0.072730962 | 0 | 0.18737777  |
| cov1_3_7_8     | 20.9475 | -358.828 | 0.646754  | 0 | 0.10940445   | 0 | 0           |
| cov7_8_10_11   | 20.9585 | -358.834 | 0.6464731 | 0 | 0            | 0 | 0           |
| cov1_6_7_10    | 20.9705 | -358.84  | 0.6498597 | 0 | 0.030605918  | 0 | 0           |
| cov1_7_10_11   | 20.9746 | -358.842 | 0.6497808 | 0 | 0.042146646  | 0 | 0           |
| cov3_6_7_8     | 20.9877 | -358.848 | 0.6468797 | 0 | 0            | 0 | 0           |
| cov6_7_10_11   | 20.9895 | -358.849 | 0.6491335 | 0 | 0            | 0 | 0           |
| cov2_5_8_11    | 21.0089 | -358.859 | 0.6470029 | 0 | 0            | 0 | 0.16370123  |
| cov2_6_8_11    | 21.0093 | -358.859 | 0.6469484 | 0 | 0            | 0 | 0.16734176  |
| cov2_5_6_8     | 21.0158 | -358.862 | 0.6448135 | 0 | 0            | 0 | 0.16904606  |
| cov1_3_6_7     | 21.037  | -358.873 | 0.6469591 | 0 | 0.068779281  | 0 | 0           |
| cov3_4_5_9_10  | 21.0661 | -355.49  | 0.6347972 | 0 | 0            | 0 | 0           |
| cov3_4_5_9_11  | 21.072  | -355.493 | 0.6331808 | 0 | 0            | 0 | 0           |
| cov3_4_5_6_9   | 21.0738 | -355.494 | 0.6358628 | 0 | 0            | 0 | 0           |
| cov1_3_4_5_10  | 21.0799 | -355.497 | 0.6361936 | 0 | 0.14136039   | 0 | 0           |
| cov1_3_7_11    | 21.0802 | -358.895 | 0.646438  | 0 | 0.10680396   | 0 | 0           |
| cov1_3_6_8     | 21.0811 | -358.895 | 0.647123  | 0 | 0.070350536  | 0 | 0           |
| cov2_3_4_5_9   | 21.0974 | -355.506 | 0.6347055 | 0 | 0            | 0 | 0.045798003 |
| cov1_6_8_10    | 21.0985 | -358.904 | 0.6502382 | 0 | 0.03377689   | 0 | 0           |
| cov1_8_10_11   | 21.1008 | -358.905 | 0.650277  | 0 | 0.043610692  | 0 | 0           |
| cov6_8_10_11   | 21.1227 | -358.916 | 0.6495386 | 0 | 0            | 0 | 0           |
| cov1_3_8_11    | 21.1229 | -358.916 | 0.6466677 | 0 | 0.10827305   | 0 | 0           |
| cov3_6_7_11    | 21.1338 | -358.921 | 0.6457689 | 0 | 0            | 0 | 0           |
| cov3_4_5_8_9   | 21.1501 | -355.532 | 0.636526  | 0 | 0            | 0 | 0           |
| cov3_4_5_7_9   | 21.1608 | -355.538 | 0.6365075 | 0 | 0            | 0 | 0           |
| cov3_6_8_11    | 21.1843 | -358.947 | 0.6459912 | 0 | 0            | 0 | 0           |
| cov1_3_6_11    | 21.3325 | -359.021 | 0.6500957 | 0 | 0.080595936  | 0 | 0           |
| cov3_4_5_6_10  | 21.3726 | -355.644 | 0.6373663 | 0 | 0            | 0 | 0           |
| cov3_4_5_10_11 | 21.3862 | -355.65  | 0.63458   | 0 | 0            | 0 | 0           |

|               |         |          |           |   |              |   |             |
|---------------|---------|----------|-----------|---|--------------|---|-------------|
| cov2_3_4_5_10 | 21.4048 | -355.66  | 0.6360674 | 0 | 0            | 0 | 0.052804972 |
| cov3_4_5_8_10 | 21.49   | -355.702 | 0.638248  | 0 | 0            | 0 | 0           |
| cov3_4_5_7_10 | 21.4986 | -355.707 | 0.6382154 | 0 | 0            | 0 | 0           |
| cov3_7_8_11   | 21.6653 | -359.187 | 0.6377434 | 0 | 0            | 0 | 0           |
| cov3_5_7_11   | 21.7635 | -359.236 | 0.6398479 | 0 | 0            | 0 | 0           |
| cov3_5_8_11   | 21.8293 | -359.269 | 0.6398812 | 0 | 0            | 0 | 0           |
| cov3_5_7_8    | 21.9971 | -359.353 | 0.6460981 | 0 | 0            | 0 | 0           |
| cov1_6_7_8    | 22.2047 | -359.457 | 0.6506053 | 0 | 0.047323794  | 0 | 0           |
| cov1_3_4_5_8  | 22.2295 | -356.072 | 0.6346523 | 0 | 0.36308191   | 0 | 0           |
| cov5_6_7_8    | 22.2331 | -359.471 | 0.6505934 | 0 | 0            | 0 | 0           |
| cov1_5_7_8    | 22.2447 | -359.477 | 0.6505555 | 0 | 0.0809217    | 0 | 0           |
| cov1_7_8_11   | 22.2463 | -359.478 | 0.6506249 | 0 | 0.08852691   | 0 | 0           |
| cov6_7_8_11   | 22.2541 | -359.482 | 0.6499698 | 0 | 0            | 0 | 0           |
| cov1_3_4_5_7  | 22.2722 | -356.093 | 0.6347101 | 0 | 0.35798725   | 0 | 0           |
| cov2_9_10_11  | 22.3043 | -359.507 | 0.6637162 | 0 | 0            | 0 | 0.14102988  |
| cov1_5_6_7    | 22.3217 | -359.515 | 0.6505381 | 0 | 0.045639056  | 0 | 0           |
| cov1_6_7_11   | 22.3218 | -359.515 | 0.6508052 | 0 | 0.053545539  | 0 | 0           |
| cov1_5_7_11   | 22.3553 | -359.532 | 0.6505524 | 0 | 0.081799419  | 0 | 0           |
| cov5_6_7_11   | 22.356  | -359.533 | 0.6502875 | 0 | 0            | 0 | 0           |
| cov1_2_5_9    | 22.3621 | -359.536 | 0.6600849 | 0 | -0.20215148  | 0 | 0.16288494  |
| cov1_2_4_11   | 22.3754 | -359.542 | 0.6642655 | 0 | -0.062123053 | 0 | 0.088734592 |
| cov1_2_9_11   | 22.419  | -359.564 | 0.6629095 | 0 | -0.056797337 | 0 | 0.17523538  |
| cov5_7_8_11   | 22.4447 | -359.577 | 0.6480664 | 0 | 0            | 0 | 0           |
| cov1_6_8_11   | 22.4489 | -359.579 | 0.6512355 | 0 | 0.057528943  | 0 | 0           |
| cov1_5_6_8    | 22.4497 | -359.579 | 0.6508654 | 0 | 0.04884654   | 0 | 0           |
| cov1_5_8_11   | 22.4773 | -359.593 | 0.6509848 | 0 | 0.083202693  | 0 | 0           |
| cov2_4_6_11   | 22.4787 | -359.594 | 0.6666721 | 0 | 0            | 0 | 0.067302175 |
| cov2_5_9_11   | 22.4829 | -359.596 | 0.6676978 | 0 | 0            | 0 | 0.12512103  |
| cov5_6_8_11   | 22.4893 | -359.599 | 0.6507059 | 0 | 0            | 0 | 0           |
| cov2_6_9_11   | 22.4918 | -359.601 | 0.6648936 | 0 | 0            | 0 | 0.15622588  |
| cov1_2_9_10   | 22.4933 | -359.601 | 0.6568922 | 0 | -0.1058536   | 0 | 0.17125801  |
| cov1_3_4_5_11 | 22.5104 | -356.212 | 0.6344396 | 0 | 0.27977137   | 0 | 0           |
| cov1_3_4_5_6  | 22.5135 | -356.214 | 0.6356094 | 0 | 0.26847932   | 0 | 0           |
| cov1_2_3_4_5  | 22.5221 | -356.218 | 0.6352506 | 0 | 0.28090845   | 0 | 0.009643579 |
| cov1_4_6_11   | 22.6116 | -359.66  | 0.6669844 | 0 | -0.045805974 | 0 | 0           |
| cov1_2_4_6    | 22.6142 | -359.662 | 0.6605028 | 0 | -0.12165167  | 0 | 0.081229936 |
| cov1_2_3_4_9  | 22.6231 | -356.269 | 0.6390828 | 0 | -0.13742025  | 0 | 0.08599352  |
| cov1_2_5_10   | 22.6699 | -359.69  | 0.6612383 | 0 | -0.18919608  | 0 | 0.16495372  |
| cov1_2_10_11  | 22.6721 | -359.691 | 0.6638012 | 0 | -0.05226501  | 0 | 0.17672612  |
| cov1_2_6_9    | 22.7044 | -359.707 | 0.6594191 | 0 | -0.10523289  | 0 | 0.17091043  |
| cov2_6_9_10   | 22.7046 | -359.707 | 0.6595742 | 0 | 0            | 0 | 0.13917331  |
| cov2_5_10_11  | 22.7278 | -359.718 | 0.6681843 | 0 | 0            | 0 | 0.13076476  |
| cov1_3_4_7_9  | 22.7364 | -356.325 | 0.6414145 | 0 | -0.11253884  | 0 | 0           |
| cov2_6_10_11  | 22.7373 | -359.723 | 0.6656646 | 0 | 0            | 0 | 0.15832751  |
| cov1_3_4_8_9  | 22.7621 | -356.338 | 0.6414993 | 0 | -0.11114842  | 0 | 0           |
| cov1_3_4_9_10 | 22.7637 | -356.339 | 0.6407884 | 0 | -0.10334692  | 0 | 0           |
| cov2_3_4_6_9  | 22.8197 | -356.367 | 0.6407239 | 0 | 0            | 0 | 0.062632158 |

|                |         |          |           |   |              |   |              |
|----------------|---------|----------|-----------|---|--------------|---|--------------|
| cov1_3_4_6_9   | 22.8214 | -356.368 | 0.6420348 | 0 | -0.080333675 | 0 | 0            |
| cov1_3_4_9_11  | 22.8371 | -356.376 | 0.6420674 | 0 | -0.10241663  | 0 | 0            |
| cov2_5_6_9     | 22.8425 | -359.776 | 0.6630044 | 0 | 0            | 0 | 0.12799704   |
| cov3_4_6_7_9   | 22.8632 | -356.389 | 0.6422842 | 0 | 0            | 0 | 0            |
| cov3_4_6_9_10  | 22.8738 | -356.394 | 0.6415088 | 0 | 0            | 0 | 0            |
| cov3_4_6_8_9   | 22.8832 | -356.399 | 0.6423332 | 0 | 0            | 0 | 0            |
| cov3_4_6_9_11  | 22.9349 | -356.425 | 0.6435019 | 0 | 0            | 0 | 0            |
| cov2_5_9_10    | 22.951  | -359.83  | 0.6612742 | 0 | 0            | 0 | 0.10008743   |
| cov1_2_6_10    | 22.9565 | -359.833 | 0.6603303 | 0 | -0.10232298  | 0 | 0.17223864   |
| cov1_2_3_4_10  | 22.9626 | -356.439 | 0.6406732 | 0 | -0.13123506  | 0 | 0.089700273  |
| cov2_3_5_9_10  | 22.9911 | -356.453 | 0.6304837 | 0 | 0            | 0 | 0.18121591   |
| cov2_3_5_8_9   | 23.0034 | -356.459 | 0.6319637 | 0 | 0            | 0 | 0.19416596   |
| cov2_3_5_7_9   | 23.0285 | -356.472 | 0.6319875 | 0 | 0            | 0 | 0.19247676   |
| cov1_3_4_7_10  | 23.0888 | -356.502 | 0.643236  | 0 | -0.10511184  | 0 | 0            |
| cov2_5_6_10    | 23.1005 | -359.905 | 0.6637236 | 0 | 0            | 0 | 0.13179685   |
| cov2_3_5_6_9   | 23.1029 | -356.509 | 0.6321443 | 0 | 0            | 0 | 0.18375387   |
| cov4_5_7_9_10  | 23.1043 | -356.509 | 0.643658  | 0 | 0            | 0 | 0            |
| cov1_2_3_5_9   | 23.1049 | -356.51  | 0.6322013 | 0 | -0.013425304 | 0 | 0.18402288   |
| cov2_3_5_9_11  | 23.1054 | -356.51  | 0.6317005 | 0 | 0            | 0 | 0.17915751   |
| cov1_3_4_8_10  | 23.1153 | -356.515 | 0.643325  | 0 | -0.10371486  | 0 | 0            |
| cov3_4_9_10_11 | 23.132  | -356.523 | 0.6455717 | 0 | 0            | 0 | 0            |
| cov5_9_10_11   | 23.1385 | -359.924 | 0.6678444 | 0 | 0            | 0 | 0            |
| cov2_3_4_6_10  | 23.1444 | -356.529 | 0.6422857 | 0 | 0            | 0 | 0.067167     |
| cov2_4_5_7_9   | 23.1503 | -356.532 | 0.64761   | 0 | 0            | 0 | -0.055856265 |
| cov4_5_7_8_9   | 23.1527 | -356.534 | 0.6462634 | 0 | 0            | 0 | 0            |
| cov2_3_4_9_11  | 23.1759 | -356.545 | 0.6462718 | 0 | 0            | 0 | 0.031153291  |
| cov3_4_7_8_9   | 23.1799 | -356.547 | 0.6438882 | 0 | 0            | 0 | 0            |
| cov1_3_4_6_10  | 23.182  | -356.548 | 0.6439026 | 0 | -0.074248987 | 0 | 0            |
| cov3_4_7_9_11  | 23.1862 | -356.55  | 0.6465244 | 0 | 0            | 0 | 0            |
| cov4_5_8_9_10  | 23.1935 | -356.554 | 0.643954  | 0 | 0            | 0 | 0            |
| cov1_3_4_10_11 | 23.1956 | -356.555 | 0.6438866 | 0 | -0.095144052 | 0 | 0            |
| cov3_4_8_9_11  | 23.197  | -356.556 | 0.6465748 | 0 | 0            | 0 | 0            |
| cov4_5_6_7_9   | 23.1982 | -356.556 | 0.6461295 | 0 | 0            | 0 | 0            |
| cov1_4_5_7_9   | 23.2    | -356.557 | 0.6455897 | 0 | -0.057860346 | 0 | 0            |
| cov3_4_6_7_10  | 23.2    | -356.557 | 0.643977  | 0 | 0            | 0 | 0            |
| cov1_2_3_9_10  | 23.2139 | -356.564 | 0.6335847 | 0 | -0.099267654 | 0 | 0.17640037   |
| cov3_4_6_8_10  | 23.221  | -356.568 | 0.6440317 | 0 | 0            | 0 | 0            |
| cov2_4_5_8_9   | 23.2368 | -356.576 | 0.647925  | 0 | 0            | 0 | -0.056480288 |
| cov3_4_7_9_10  | 23.2593 | -356.587 | 0.642634  | 0 | 0            | 0 | 0            |
| cov4_5_7_9_11  | 23.2653 | -356.59  | 0.6471665 | 0 | 0            | 0 | 0            |
| cov3_4_8_9_10  | 23.2721 | -356.593 | 0.6426929 | 0 | 0            | 0 | 0            |
| cov2_3_5_8_10  | 23.2725 | -356.594 | 0.6332411 | 0 | 0            | 0 | 0.19887877   |
| cov3_4_6_10_11 | 23.2801 | -356.597 | 0.6451349 | 0 | 0            | 0 | 0            |
| cov2_3_4_9_10  | 23.2838 | -356.599 | 0.6425347 | 0 | 0            | 0 | 0.013362967  |
| cov4_5_6_8_9   | 23.2838 | -356.599 | 0.6464164 | 0 | 0            | 0 | 0            |
| cov1_5_9_11    | 23.2857 | -359.997 | 0.6691359 | 0 | -0.040693165 | 0 | 0            |
| cov1_4_5_8_9   | 23.2913 | -356.603 | 0.6459009 | 0 | -0.057212129 | 0 | 0            |

|                |         |          |           |   |              |   |              |
|----------------|---------|----------|-----------|---|--------------|---|--------------|
| cov2_3_5_7_10  | 23.2964 | -356.605 | 0.6332555 | 0 | 0            | 0 | 0.19718575   |
| cov1_2_3_6_9   | 23.3034 | -356.609 | 0.6348852 | 0 | -0.081860871 | 0 | 0.17771682   |
| cov2_3_4_5_6   | 23.3082 | -356.611 | 0.6355561 | 0 | 0            | 0 | 0.092854469  |
| cov1_2_3_8_9   | 23.3097 | -356.612 | 0.6350796 | 0 | -0.097584586 | 0 | 0.17656826   |
| cov1_2_3_9_11  | 23.3108 | -356.613 | 0.6348115 | 0 | -0.099343669 | 0 | 0.17634847   |
| cov1_2_3_7_9   | 23.3111 | -356.613 | 0.6349745 | 0 | -0.097724063 | 0 | 0.17644836   |
| cov5_6_9_11    | 23.3195 | -360.014 | 0.6699762 | 0 | 0            | 0 | 0            |
| cov2_3_6_9_10  | 23.3319 | -356.623 | 0.6348874 | 0 | 0            | 0 | 0.15281553   |
| cov2_3_4_7_9   | 23.3327 | -356.624 | 0.6437081 | 0 | 0            | 0 | 0.00668204   |
| cov2_3_4_8_9   | 23.3433 | -356.629 | 0.6437095 | 0 | 0            | 0 | 0.008497065  |
| cov4_5_8_9_11  | 23.3523 | -356.633 | 0.6475362 | 0 | 0            | 0 | 0            |
| cov1_5_9_10    | 23.3537 | -360.031 | 0.6638478 | 0 | -0.080791064 | 0 | 0            |
| cov2_3_5_10_11 | 23.3628 | -356.639 | 0.6327152 | 0 | 0            | 0 | 0.18406939   |
| cov2_3_5_6_10  | 23.3665 | -356.641 | 0.6333803 | 0 | 0            | 0 | 0.18730561   |
| cov1_2_3_5_10  | 23.3676 | -356.641 | 0.6333948 | 0 | -0.001315273 | 0 | 0.18603896   |
| cov4_5_7_8_10  | 23.3938 | -356.654 | 0.647226  | 0 | 0            | 0 | 0            |
| cov2_3_6_9_11  | 23.4178 | -356.666 | 0.636764  | 0 | 0            | 0 | 0.15517285   |
| cov2_3_6_8_9   | 23.4211 | -356.668 | 0.6362772 | 0 | 0            | 0 | 0.15364403   |
| cov2_3_6_7_9   | 23.4225 | -356.669 | 0.6361905 | 0 | 0            | 0 | 0.15354132   |
| cov2_4_5_7_10  | 23.4239 | -356.669 | 0.6484916 | 0 | 0            | 0 | -0.048309048 |
| cov3_4_7_8_10  | 23.4607 | -356.688 | 0.645335  | 0 | 0            | 0 | 0            |
| cov4_5_6_7_10  | 23.4677 | -356.691 | 0.6471941 | 0 | 0            | 0 | 0            |
| cov5_6_9_10    | 23.4694 | -360.089 | 0.6646242 | 0 | 0            | 0 | 0            |
| cov2_3_4_10_11 | 23.471  | -356.693 | 0.6474594 | 0 | 0            | 0 | 0.036993302  |
| cov1_4_5_7_10  | 23.4754 | -356.695 | 0.6468325 | 0 | -0.043751046 | 0 | 0            |
| cov3_4_7_10_11 | 23.4883 | -356.701 | 0.6477841 | 0 | 0            | 0 | 0            |
| cov3_4_5_6_11  | 23.4927 | -356.704 | 0.6363028 | 0 | 0            | 0 | 0            |
| cov3_4_8_10_11 | 23.5008 | -356.708 | 0.6478452 | 0 | 0            | 0 | 0            |
| cov2_4_5_8_10  | 23.5109 | -356.713 | 0.648806  | 0 | 0            | 0 | -0.04892684  |
| cov4_5_7_10_11 | 23.5131 | -356.714 | 0.6478849 | 0 | 0            | 0 | 0            |
| cov1_5_6_9     | 23.5147 | -360.112 | 0.665862  | 0 | -0.093817356 | 0 | 0            |
| cov2_3_9_10_11 | 23.5271 | -356.721 | 0.6397265 | 0 | 0            | 0 | 0.11788331   |
| cov1_9_10_11   | 23.5414 | -360.125 | 0.6665491 | 0 | 0.081526805  | 0 | 0            |
| cov4_5_6_8_10  | 23.5542 | -356.734 | 0.6474811 | 0 | 0            | 0 | 0            |
| cov2_3_7_8_9   | 23.5547 | -356.735 | 0.6395673 | 0 | 0            | 0 | 0.097107014  |
| cov6_9_10_11   | 23.5586 | -360.134 | 0.6653984 | 0 | 0            | 0 | 0            |
| cov1_4_5_8_10  | 23.5664 | -356.74  | 0.6471269 | 0 | -0.043106551 | 0 | 0            |
| cov1_4_7_9_10  | 23.5832 | -356.749 | 0.6444627 | 0 | -0.1641419   | 0 | 0            |
| cov3_4_5_6_8   | 23.5874 | -356.751 | 0.6395395 | 0 | 0            | 0 | 0            |
| cov1_4_7_8_9   | 23.5877 | -356.751 | 0.6465307 | 0 | -0.16450622  | 0 | 0            |
| cov3_4_5_6_7   | 23.5897 | -356.752 | 0.6394783 | 0 | 0            | 0 | 0            |
| cov4_5_8_10_11 | 23.6008 | -356.758 | 0.6482506 | 0 | 0            | 0 | 0            |
| cov1_2_3_6_10  | 23.6058 | -356.76  | 0.6365024 | 0 | -0.078453298 | 0 | 0.1789276    |
| cov2_3_4_7_10  | 23.6083 | -356.761 | 0.6449838 | 0 | 0            | 0 | 0.012803242  |
| cov1_2_3_8_10  | 23.6117 | -356.763 | 0.6366921 | 0 | -0.092849685 | 0 | 0.17784085   |
| cov1_2_3_10_11 | 23.6119 | -356.763 | 0.6364414 | 0 | -0.094788743 | 0 | 0.17764335   |
| cov1_2_3_7_10  | 23.612  | -356.763 | 0.6365799 | 0 | -0.093002967 | 0 | 0.17772357   |

|                |         |          |           |   |              |   |              |
|----------------|---------|----------|-----------|---|--------------|---|--------------|
| cov2_3_8_9_11  | 23.6131 | -356.764 | 0.6411965 | 0 | 0            | 0 | 0.1195033    |
| cov2_3_7_9_11  | 23.6189 | -356.767 | 0.6410824 | 0 | 0            | 0 | 0.11892394   |
| cov2_3_4_8_10  | 23.6197 | -356.767 | 0.6449916 | 0 | 0            | 0 | 0.01462279   |
| cov1_5_10_11   | 23.6279 | -360.169 | 0.6703561 | 0 | -0.026425589 | 0 | 0            |
| cov2_3_8_9_10  | 23.6295 | -356.772 | 0.6384034 | 0 | 0            | 0 | 0.0962163    |
| cov2_3_7_9_10  | 23.6304 | -356.772 | 0.6382975 | 0 | 0            | 0 | 0.095978345  |
| cov5_6_10_11   | 23.6419 | -360.176 | 0.6709346 | 0 | 0            | 0 | 0            |
| cov1_4_8_9_10  | 23.6854 | -356.8   | 0.6447948 | 0 | -0.16459219  | 0 | 0            |
| cov1_4_6_7_9   | 23.6866 | -356.801 | 0.6466123 | 0 | -0.13459639  | 0 | 0            |
| cov1_2_4_7_9   | 23.7056 | -356.81  | 0.6459101 | 0 | -0.17182573  | 0 | 0.015995678  |
| cov2_3_6_10_11 | 23.7113 | -356.813 | 0.6382662 | 0 | 0            | 0 | 0.15723215   |
| cov1_4_7_9_11  | 23.7136 | -356.814 | 0.6464052 | 0 | -0.16439579  | 0 | 0            |
| cov2_3_6_8_10  | 23.7147 | -356.815 | 0.6378006 | 0 | 0            | 0 | 0.15578845   |
| cov2_3_6_7_10  | 23.7152 | -356.815 | 0.6377073 | 0 | 0            | 0 | 0.15567144   |
| cov1_6_9_11    | 23.7336 | -360.221 | 0.6688805 | 0 | 0.05120408   | 0 | 0            |
| cov1_6_9_10    | 23.762  | -360.236 | 0.6634684 | 0 | 0.012152713  | 0 | 0            |
| cov2_3_4_5_11  | 23.7715 | -356.843 | 0.6310271 | 0 | 0            | 0 | 0.14641532   |
| cov1_4_6_8_9   | 23.7843 | -356.849 | 0.6469482 | 0 | -0.13266591  | 0 | 0            |
| cov1_2_4_8_9   | 23.8084 | -356.862 | 0.6462664 | 0 | -0.1719447   | 0 | 0.015273996  |
| cov1_4_8_9_11  | 23.8156 | -356.865 | 0.6468662 | 0 | -0.16366646  | 0 | 0            |
| cov2_3_7_8_10  | 23.8194 | -356.867 | 0.6408443 | 0 | 0            | 0 | 0.1018851    |
| cov1_5_6_10    | 23.8516 | -360.28  | 0.6671264 | 0 | -0.081875864 | 0 | 0            |
| cov2_3_8_10_11 | 23.8898 | -356.902 | 0.6423937 | 0 | 0            | 0 | 0.12311222   |
| cov1_2_6_11    | 23.8919 | -360.301 | 0.663084  | 0 | -0.053081109 | 0 | 0.18992662   |
| cov2_3_7_10_11 | 23.8943 | -356.904 | 0.6420236 | 0 | 0            | 0 | 0.12241857   |
| cov2_5_6_11    | 23.9016 | -360.305 | 0.6634755 | 0 | 0            | 0 | 0.1822083    |
| cov4_6_7_9_10  | 23.9113 | -356.913 | 0.6471376 | 0 | 0            | 0 | 0            |
| cov1_2_5_11    | 23.9172 | -360.313 | 0.6627149 | 0 | -0.00762556  | 0 | 0.19339568   |
| cov2_3_4_5_7   | 23.9206 | -356.918 | 0.6352521 | 0 | 0            | 0 | 0.15384183   |
| cov1_4_7_8_10  | 23.9222 | -356.918 | 0.648126  | 0 | -0.15645468  | 0 | 0            |
| cov2_3_4_5_8   | 23.934  | -356.924 | 0.6352289 | 0 | 0            | 0 | 0.15646461   |
| cov4_6_7_8_9   | 23.9362 | -356.925 | 0.6491757 | 0 | 0            | 0 | 0            |
| cov4_6_8_9_10  | 23.9992 | -356.957 | 0.6474024 | 0 | 0            | 0 | 0            |
| cov1_6_10_11   | 24.0074 | -360.358 | 0.6698036 | 0 | 0.055186648  | 0 | 0            |
| cov4_6_7_9_11  | 24.0098 | -356.962 | 0.6503773 | 0 | 0            | 0 | 0            |
| cov1_4_6_7_10  | 24.0236 | -356.969 | 0.6481894 | 0 | -0.12846254  | 0 | 0            |
| cov2_4_6_7_9   | 24.0281 | -356.971 | 0.6493907 | 0 | 0            | 0 | -0.015692212 |
| cov1_2_4_7_10  | 24.0347 | -356.975 | 0.6473622 | 0 | -0.16562179  | 0 | 0.019977269  |
| cov1_4_7_10_11 | 24.0472 | -356.981 | 0.6479492 | 0 | -0.15684209  | 0 | 0            |
| cov4_6_8_9_11  | 24.0957 | -357.005 | 0.6506942 | 0 | 0            | 0 | 0            |
| cov2_4_6_8_9   | 24.1159 | -357.015 | 0.649658  | 0 | 0            | 0 | -0.015733368 |
| cov1_4_6_8_10  | 24.1218 | -357.018 | 0.6485229 | 0 | -0.12651683  | 0 | 0            |
| cov1_2_4_8_10  | 24.138  | -357.026 | 0.647716  | 0 | -0.16573509  | 0 | 0.019255112  |
| cov1_4_8_10_11 | 24.1496 | -357.032 | 0.6484013 | 0 | -0.15610374  | 0 | 0            |
| cov1_2_5_6     | 24.222  | -360.466 | 0.6587831 | 0 | -0.078920575 | 0 | 0.18713636   |
| cov4_6_7_8_10  | 24.2426 | -357.079 | 0.6505023 | 0 | 0            | 0 | 0            |
| cov4_6_7_10_11 | 24.3202 | -357.117 | 0.6516099 | 0 | 0            | 0 | 0            |



|                |         |          |           |   |             |   |              |
|----------------|---------|----------|-----------|---|-------------|---|--------------|
| cov2_4_6_7_10  | 24.3393 | -357.127 | 0.6506248 | 0 | 0           | 0 | -0.010931578 |
| cov3_4_5_7_11  | 24.39   | -357.152 | 0.6355776 | 0 | 0           | 0 | 0            |
| cov4_6_8_10_11 | 24.407  | -357.161 | 0.651933  | 0 | 0           | 0 | 0            |
| cov3_4_5_8_11  | 24.4277 | -357.171 | 0.6356095 | 0 | 0           | 0 | 0            |
| cov2_4_6_8_10  | 24.428  | -357.171 | 0.6508929 | 0 | 0           | 0 | -0.010970212 |
| cov1_3_5_9_10  | 24.4466 | -357.181 | 0.6359135 | 0 | 0.11528512  | 0 | 0            |
| cov1_3_7_8_9   | 24.5042 | -357.209 | 0.6391804 | 0 | 0.048203373 | 0 | 0            |
| cov1_3_5_8_9   | 24.5085 | -357.212 | 0.6372023 | 0 | 0.14295158  | 0 | 0            |
| cov1_3_5_7_9   | 24.5275 | -357.221 | 0.6372496 | 0 | 0.13701875  | 0 | 0            |
| cov3_6_7_8_9   | 24.5367 | -357.226 | 0.6389136 | 0 | 0           | 0 | 0            |
| cov4_7_9_10_11 | 24.5433 | -357.229 | 0.6543401 | 0 | 0           | 0 | 0            |
| cov1_3_5_9_11  | 24.5492 | -357.232 | 0.6364633 | 0 | 0.10536728  | 0 | 0            |
| cov1_3_5_6_9   | 24.5572 | -357.236 | 0.6375045 | 0 | 0.10403704  | 0 | 0            |
| cov4_7_8_9_11  | 24.5617 | -357.238 | 0.6564475 | 0 | 0           | 0 | 0            |
| cov1_3_9_10_11 | 24.5634 | -357.239 | 0.6373864 | 0 | 0.04174076  | 0 | 0            |
| cov1_3_7_9_10  | 24.5642 | -357.239 | 0.637755  | 0 | 0.046539702 | 0 | 0            |
| cov1_3_6_9_10  | 24.5657 | -357.24  | 0.6378993 | 0 | 0.042356314 | 0 | 0            |
| cov1_3_8_9_10  | 24.5663 | -357.24  | 0.6378551 | 0 | 0.046795842 | 0 | 0            |
| cov2_4_7_9_11  | 24.5777 | -357.246 | 0.6563939 | 0 | 0           | 0 | -0.053599878 |
| cov3_5_6_9_10  | 24.5886 | -357.252 | 0.6368313 | 0 | 0           | 0 | 0            |
| cov3_6_9_10_11 | 24.5934 | -357.254 | 0.6365972 | 0 | 0           | 0 | 0            |
| cov3_7_8_9_11  | 24.5976 | -357.256 | 0.634733  | 0 | 0           | 0 | 0            |
| cov3_6_7_9_10  | 24.6038 | -357.259 | 0.6373928 | 0 | 0           | 0 | 0            |
| cov3_6_8_9_10  | 24.6064 | -357.26  | 0.6374982 | 0 | 0           | 0 | 0            |
| cov4_8_9_10_11 | 24.6369 | -357.276 | 0.6547312 | 0 | 0           | 0 | 0            |
| cov3_7_9_10_11 | 24.6555 | -357.285 | 0.6334354 | 0 | 0           | 0 | 0            |
| cov3_5_7_8_9   | 24.6582 | -357.286 | 0.6383934 | 0 | 0           | 0 | 0            |
| cov1_3_7_9_11  | 24.6606 | -357.288 | 0.63846   | 0 | 0.041380596 | 0 | 0            |
| cov1_3_6_9_11  | 24.6617 | -357.288 | 0.6386165 | 0 | 0.039948049 | 0 | 0            |
| cov1_3_8_9_11  | 24.6618 | -357.288 | 0.6386077 | 0 | 0.042284936 | 0 | 0            |
| cov3_8_9_10_11 | 24.6628 | -357.289 | 0.6335131 | 0 | 0           | 0 | 0            |
| cov3_5_9_10_11 | 24.663  | -357.289 | 0.6344863 | 0 | 0           | 0 | 0            |
| cov1_3_6_7_9   | 24.6653 | -357.29  | 0.6391684 | 0 | 0.044481581 | 0 | 0            |
| cov1_3_6_8_9   | 24.6655 | -357.29  | 0.6392526 | 0 | 0.044655966 | 0 | 0            |
| cov3_5_6_9_11  | 24.6701 | -357.292 | 0.6366318 | 0 | 0           | 0 | 0            |
| cov2_4_8_9_11  | 24.6706 | -357.293 | 0.6567852 | 0 | 0           | 0 | -0.053792242 |
| cov2_4_5_9_10  | 24.6784 | -357.296 | 0.6563196 | 0 | 0           | 0 | -0.072921875 |
| cov3_7_8_9_10  | 24.6817 | -357.298 | 0.6336968 | 0 | 0           | 0 | 0            |
| cov3_4_5_7_8   | 24.6848 | -357.3   | 0.6426846 | 0 | 0           | 0 | 0            |
| cov3_6_7_9_11  | 24.6917 | -357.303 | 0.6376164 | 0 | 0           | 0 | 0            |
| cov3_6_8_9_11  | 24.694  | -357.304 | 0.6377587 | 0 | 0           | 0 | 0            |
| cov3_5_6_8_9   | 24.6947 | -357.305 | 0.6383376 | 0 | 0           | 0 | 0            |
| cov3_5_6_7_9   | 24.6985 | -357.307 | 0.6383238 | 0 | 0           | 0 | 0            |
| cov3_5_7_9_10  | 24.7113 | -357.313 | 0.63692   | 0 | 0           | 0 | 0            |
| cov3_5_8_9_10  | 24.7212 | -357.318 | 0.6369396 | 0 | 0           | 0 | 0            |
| cov1_4_5_7_8   | 24.7235 | -357.319 | 0.6458419 | 0 | 0.10178468  | 0 | 0            |
| cov4_5_9_10_11 | 24.7388 | -357.327 | 0.6569893 | 0 | 0           | 0 | 0            |

|                |         |          |           |   |              |   |              |
|----------------|---------|----------|-----------|---|--------------|---|--------------|
| cov3_5_7_9_11  | 24.7512 | -357.333 | 0.6358721 | 0 | 0            | 0 | 0            |
| cov2_4_7_9_10  | 24.7562 | -357.335 | 0.6520096 | 0 | 0            | 0 | -0.082370949 |
| cov2_4_7_8_9   | 24.7565 | -357.336 | 0.6540199 | 0 | 0            | 0 | -0.084074292 |
| cov3_5_8_9_11  | 24.7581 | -357.336 | 0.6358495 | 0 | 0            | 0 | 0            |
| cov2_4_5_9_11  | 24.7716 | -357.343 | 0.6599883 | 0 | 0            | 0 | -0.061352707 |
| cov1_3_5_8_10  | 24.8013 | -357.358 | 0.6384701 | 0 | 0.15754036   | 0 | 0            |
| cov4_7_8_10_11 | 24.8116 | -357.363 | 0.657201  | 0 | 0            | 0 | 0            |
| cov1_2_4_5_9   | 24.8181 | -357.366 | 0.6593303 | 0 | 0.036487106  | 0 | -0.09245174  |
| cov1_3_5_7_10  | 24.821  | -357.368 | 0.6385199 | 0 | 0.15165966   | 0 | 0            |
| cov1_2_3_5_8   | 24.823  | -357.369 | 0.6320513 | 0 | 0.17295151   | 0 | 0.21541628   |
| cov1_3_7_8_10  | 24.8278 | -357.371 | 0.6407715 | 0 | 0.054171432  | 0 | 0            |
| cov1_2_4_5_7   | 24.8285 | -357.372 | 0.646615  | 0 | 0.12305728   | 0 | -0.025017284 |
| cov2_4_5_6_9   | 24.8382 | -357.376 | 0.6587039 | 0 | 0            | 0 | -0.077164675 |
| cov1_4_5_6_7   | 24.8435 | -357.379 | 0.6457025 | 0 | 0.094256526  | 0 | 0            |
| cov1_3_5_10_11 | 24.8444 | -357.379 | 0.6376986 | 0 | 0.11841132   | 0 | 0            |
| cov1_4_5_7_11  | 24.8444 | -357.379 | 0.6459355 | 0 | 0.10343544   | 0 | 0            |
| cov1_2_3_5_7   | 24.8491 | -357.382 | 0.6321099 | 0 | 0.16779741   | 0 | 0.21481997   |
| cov2_4_7_10_11 | 24.8505 | -357.383 | 0.6572204 | 0 | 0            | 0 | -0.047458845 |
| cov1_3_5_6_10  | 24.8523 | -357.383 | 0.6388084 | 0 | 0.11550611   | 0 | 0            |
| cov4_5_6_7_8   | 24.8543 | -357.384 | 0.6454619 | 0 | 0            | 0 | 0            |
| cov2_4_8_9_10  | 24.8608 | -357.388 | 0.6523676 | 0 | 0            | 0 | -0.083177508 |
| cov3_6_7_8_10  | 24.8678 | -357.391 | 0.6405207 | 0 | 0            | 0 | 0            |
| cov4_5_6_9_10  | 24.8738 | -357.394 | 0.6546661 | 0 | 0            | 0 | 0            |
| cov1_4_5_9_10  | 24.8777 | -357.396 | 0.6542942 | 0 | -0.033995774 | 0 | 0            |
| cov1_2_3_5_6   | 24.9101 | -357.412 | 0.632725  | 0 | 0.11079029   | 0 | 0.20896125   |
| cov4_5_6_9_11  | 24.9116 | -357.413 | 0.6593609 | 0 | 0            | 0 | 0            |
| cov1_2_4_5_8   | 24.9118 | -357.413 | 0.6469252 | 0 | 0.12466388   | 0 | -0.026493956 |
| cov1_4_5_9_11  | 24.9147 | -357.415 | 0.6593355 | 0 | -0.005269438 | 0 | 0            |
| cov1_2_3_5_11  | 24.924  | -357.419 | 0.6320949 | 0 | 0.13006051   | 0 | 0.21075462   |
| cov4_7_8_9_10  | 24.9273 | -357.421 | 0.6508589 | 0 | 0            | 0 | 0            |
| cov1_4_5_8_11  | 24.9291 | -357.422 | 0.6462971 | 0 | 0.10483042   | 0 | 0            |
| cov1_4_5_6_8   | 24.9295 | -357.422 | 0.6459713 | 0 | 0.096761561  | 0 | 0            |
| cov2_4_8_10_11 | 24.9442 | -357.429 | 0.6576096 | 0 | 0            | 0 | -0.047647387 |
| cov3_7_8_10_11 | 24.9484 | -357.432 | 0.6358699 | 0 | 0            | 0 | 0            |
| cov2_4_5_6_7   | 24.9802 | -357.447 | 0.6448637 | 0 | 0            | 0 | 0.01530502   |
| cov4_5_6_7_11  | 24.9815 | -357.448 | 0.6446108 | 0 | 0            | 0 | 0            |
| cov1_3_7_10_11 | 24.9824 | -357.449 | 0.6400049 | 0 | 0.046762019  | 0 | 0            |
| cov1_3_6_10_11 | 24.9844 | -357.45  | 0.6402386 | 0 | 0.044196927  | 0 | 0            |
| cov1_3_8_10_11 | 24.9848 | -357.45  | 0.6401593 | 0 | 0.047669515  | 0 | 0            |
| cov1_3_6_7_10  | 24.9875 | -357.451 | 0.6407742 | 0 | 0.048818005  | 0 | 0            |
| cov1_3_6_8_10  | 24.9889 | -357.452 | 0.6408628 | 0 | 0.049039487  | 0 | 0            |
| cov2_4_5_7_8   | 24.9905 | -357.453 | 0.6439097 | 0 | 0            | 0 | 0.051649242  |
| cov3_5_6_10_11 | 24.9937 | -357.454 | 0.6380386 | 0 | 0            | 0 | 0            |
| cov2_4_7_8_10  | 25.0084 | -357.462 | 0.654917  | 0 | 0            | 0 | -0.077074722 |
| cov3_6_7_10_11 | 25.02   | -357.467 | 0.6391258 | 0 | 0            | 0 | 0            |
| cov3_5_7_8_10  | 25.0202 | -357.467 | 0.6400226 | 0 | 0            | 0 | 0            |
| cov3_6_8_10_11 | 25.0238 | -357.469 | 0.6392739 | 0 | 0            | 0 | 0            |

|                |         |          |           |   |              |   |              |
|----------------|---------|----------|-----------|---|--------------|---|--------------|
| cov3_5_6_8_10  | 25.0244 | -357.469 | 0.6398886 | 0 | 0            | 0 | 0            |
| cov3_5_6_7_10  | 25.0274 | -357.471 | 0.639868  | 0 | 0            | 0 | 0            |
| cov1_4_5_6_9   | 25.0372 | -357.476 | 0.6569142 | 0 | -0.020990838 | 0 | 0            |
| cov4_5_7_8_11  | 25.0386 | -357.477 | 0.6430077 | 0 | 0            | 0 | 0            |
| cov2_3_5_6_8   | 25.044  | -357.479 | 0.6335575 | 0 | 0            | 0 | 0.23660328   |
| cov2_3_5_6_7   | 25.0566 | -357.486 | 0.6335478 | 0 | 0            | 0 | 0.23511604   |
| cov2_3_5_6_11  | 25.0588 | -357.487 | 0.6325277 | 0 | 0            | 0 | 0.23018461   |
| cov2_4_5_6_8   | 25.0743 | -357.494 | 0.6451429 | 0 | 0            | 0 | 0.015247094  |
| cov4_5_6_8_11  | 25.0767 | -357.496 | 0.6449531 | 0 | 0            | 0 | 0            |
| cov2_4_5_7_11  | 25.0795 | -357.497 | 0.6426297 | 0 | 0            | 0 | 0.040652963  |
| cov2_4_5_10_11 | 25.0831 | -357.499 | 0.6608967 | 0 | 0            | 0 | -0.054717779 |
| cov3_5_7_10_11 | 25.0973 | -357.506 | 0.6372302 | 0 | 0            | 0 | 0            |
| cov1_2_4_5_10  | 25.1032 | -357.509 | 0.6604503 | 0 | 0.049660168  | 0 | -0.09110394  |
| cov3_5_8_10_11 | 25.1063 | -357.51  | 0.6372174 | 0 | 0            | 0 | 0            |
| cov2_4_5_6_10  | 25.1377 | -357.526 | 0.659689  | 0 | 0            | 0 | -0.072621094 |
| cov2_3_5_7_8   | 25.1531 | -357.534 | 0.633378  | 0 | 0            | 0 | 0.26094749   |
| cov2_4_5_8_11  | 25.1728 | -357.544 | 0.6429574 | 0 | 0            | 0 | 0.040633866  |
| cov1_4_5_10_11 | 25.1954 | -357.555 | 0.6604129 | 0 | 0.00901597   | 0 | 0            |
| cov4_5_6_10_11 | 25.197  | -357.556 | 0.6602733 | 0 | 0            | 0 | 0            |
| cov2_3_5_7_11  | 25.2518 | -357.583 | 0.6311155 | 0 | 0            | 0 | 0.25390661   |
| cov2_3_5_8_11  | 25.2551 | -357.585 | 0.6310849 | 0 | 0            | 0 | 0.25610622   |
| cov1_4_5_6_10  | 25.3183 | -357.616 | 0.6580143 | 0 | -0.009001349 | 0 | 0            |
| cov1_5_6_11    | 25.464  | -361.087 | 0.6696572 | 0 | 0.087896485  | 0 | 0            |
| cov1_4_9_10_11 | 25.7338 | -357.824 | 0.6607564 | 0 | -0.14425517  | 0 | 0            |
| cov1_2_5_7_9   | 25.7902 | -357.852 | 0.6436098 | 0 | -0.21729871  | 0 | 0.16090659   |
| cov1_4_6_9_11  | 25.8526 | -357.884 | 0.6626294 | 0 | -0.13055216  | 0 | 0            |
| cov1_2_4_9_11  | 25.8601 | -357.887 | 0.6625615 | 0 | -0.14485267  | 0 | -0.001101043 |
| cov1_4_6_9_10  | 25.8886 | -357.902 | 0.6579021 | 0 | -0.16137167  | 0 | 0            |
| cov1_2_4_9_10  | 25.9039 | -357.909 | 0.6577852 | 0 | -0.18180266  | 0 | -0.005136172 |
| cov1_2_5_8_9   | 25.9193 | -357.917 | 0.6439952 | 0 | -0.21682116  | 0 | 0.16091632   |
| cov1_2_3_4_7   | 25.9816 | -357.948 | 0.6431895 | 0 | -0.076335445 | 0 | 0.14982399   |
| cov1_2_4_6_9   | 26.0052 | -357.96  | 0.659895  | 0 | -0.15797219  | 0 | -0.006244835 |
| cov1_2_7_9_10  | 26.0198 | -357.967 | 0.6402944 | 0 | -0.10661261  | 0 | 0.17081573   |
| cov4_6_9_10_11 | 26.0287 | -357.972 | 0.6647499 | 0 | 0            | 0 | 0            |
| cov1_2_3_4_8   | 26.0331 | -357.974 | 0.6432873 | 0 | -0.075143679 | 0 | 0.15173058   |
| cov1_2_3_7_8   | 26.0362 | -357.975 | 0.6408972 | 0 | -0.05737109  | 0 | 0.19725973   |
| cov2_3_4_7_8   | 26.0831 | -357.999 | 0.6456986 | 0 | 0            | 0 | 0.10602033   |
| cov1_2_5_7_10  | 26.0843 | -357.999 | 0.6448491 | 0 | -0.20474212  | 0 | 0.16301379   |
| cov2_3_4_6_7   | 26.1094 | -358.012 | 0.6442962 | 0 | 0            | 0 | 0.12982728   |
| cov1_2_7_8_9   | 26.1137 | -358.014 | 0.6429905 | 0 | -0.10427609  | 0 | 0.17097487   |
| cov2_3_6_7_8   | 26.1283 | -358.021 | 0.6421189 | 0 | 0            | 0 | 0.17323177   |
| cov2_4_6_9_11  | 26.1291 | -358.022 | 0.6668094 | 0 | 0            | 0 | -0.026918258 |
| cov2_3_7_8_11  | 26.13   | -358.022 | 0.6445842 | 0 | 0            | 0 | 0.16468871   |
| cov2_3_4_7_11  | 26.1439 | -358.029 | 0.6472621 | 0 | 0            | 0 | 0.118812     |
| cov1_2_8_9_10  | 26.1464 | -358.03  | 0.6406738 | 0 | -0.10640994  | 0 | 0.17079347   |
| cov2_3_4_6_8   | 26.1554 | -358.035 | 0.6443503 | 0 | 0            | 0 | 0.13206898   |
| cov1_2_3_6_7   | 26.1668 | -358.041 | 0.6409172 | 0 | -0.07138132  | 0 | 0.19583667   |

|                |         |          |           |   |              |   |              |
|----------------|---------|----------|-----------|---|--------------|---|--------------|
| cov1_2_3_7_11  | 26.1719 | -358.043 | 0.6411247 | 0 | -0.054660416 | 0 | 0.19722798   |
| cov2_3_4_8_11  | 26.1863 | -358.05  | 0.6473765 | 0 | 0            | 0 | 0.1215343    |
| cov2_6_7_9_10  | 26.1866 | -358.051 | 0.6425316 | 0 | 0            | 0 | 0.14308157   |
| cov1_2_3_6_8   | 26.2058 | -358.06  | 0.6410926 | 0 | -0.07018253  | 0 | 0.19615048   |
| cov1_2_3_8_11  | 26.2097 | -358.062 | 0.6413834 | 0 | -0.053433439 | 0 | 0.19752524   |
| cov1_2_5_8_10  | 26.2131 | -358.064 | 0.6452496 | 0 | -0.20426673  | 0 | 0.16303991   |
| cov1_4_6_10_11 | 26.2172 | -358.066 | 0.6641969 | 0 | -0.12449632  | 0 | 0            |
| cov1_2_4_10_11 | 26.2227 | -358.069 | 0.6640727 | 0 | -0.138492    | 0 | 0.002644213  |
| cov1_2_6_7_9   | 26.2331 | -358.074 | 0.6428867 | 0 | -0.09458377  | 0 | 0.17149369   |
| cov1_2_7_9_11  | 26.2337 | -358.074 | 0.6433397 | 0 | -0.099817044 | 0 | 0.1710435    |
| cov2_3_6_7_11  | 26.2426 | -358.079 | 0.6430546 | 0 | 0            | 0 | 0.17758562   |
| cov2_5_6_7_9   | 26.2679 | -358.091 | 0.6463549 | 0 | 0            | 0 | 0.1268662    |
| cov2_3_6_8_11  | 26.2771 | -358.096 | 0.6432508 | 0 | 0            | 0 | 0.17833624   |
| cov2_6_7_8_9   | 26.2841 | -358.099 | 0.6451592 | 0 | 0            | 0 | 0.14282694   |
| cov2_6_8_9_10  | 26.3014 | -358.108 | 0.6428109 | 0 | 0            | 0 | 0.14410612   |
| cov2_7_9_10_11 | 26.3363 | -358.125 | 0.6475631 | 0 | 0            | 0 | 0.11294497   |
| cov2_4_6_9_10  | 26.3373 | -358.126 | 0.6623088 | 0 | 0            | 0 | -0.042088375 |
| cov1_2_7_8_10  | 26.3464 | -358.13  | 0.6439414 | 0 | -0.099870902 | 0 | 0.17251563   |
| cov1_2_3_4_11  | 26.3576 | -358.136 | 0.6458698 | 0 | -0.048943852 | 0 | 0.17688419   |
| cov1_2_6_8_9   | 26.3582 | -358.136 | 0.6432647 | 0 | -0.091592038 | 0 | 0.17169776   |
| cov1_2_8_9_11  | 26.3592 | -358.137 | 0.6438578 | 0 | -0.098383673 | 0 | 0.17111188   |
| cov2_4_9_10_11 | 26.3676 | -358.141 | 0.6686604 | 0 | 0            | 0 | -0.057554747 |
| cov1_2_3_4_6   | 26.3681 | -358.141 | 0.6446287 | 0 | -0.076575026 | 0 | 0.17581341   |
| cov2_6_7_9_11  | 26.3686 | -358.142 | 0.6461195 | 0 | 0            | 0 | 0.14770298   |
| cov1_2_4_6_10  | 26.3693 | -358.142 | 0.6614263 | 0 | -0.15327789  | 0 | -0.002657965 |
| cov2_5_6_8_9   | 26.3786 | -358.147 | 0.6466667 | 0 | 0            | 0 | 0.1275632    |
| cov2_7_8_9_10  | 26.3839 | -358.149 | 0.6461989 | 0 | 0            | 0 | 0.084784725  |
| cov1_2_3_6_11  | 26.4044 | -358.159 | 0.6443695 | 0 | -0.060167053 | 0 | 0.19924229   |
| cov1_2_4_5_11  | 26.407  | -358.161 | 0.6598901 | 0 | 0.20401795   | 0 | -0.064053167 |
| cov1_2_4_7_8   | 26.4143 | -358.164 | 0.6467901 | 0 | -0.10260411  | 0 | 0.10025206   |
| cov2_3_4_6_11  | 26.4199 | -358.167 | 0.6473907 | 0 | 0            | 0 | 0.16056094   |
| cov2_7_8_9_11  | 26.4234 | -358.169 | 0.6500067 | 0 | 0            | 0 | 0.11376577   |
| cov2_8_9_10_11 | 26.4524 | -358.183 | 0.6479523 | 0 | 0            | 0 | 0.11379394   |
| cov1_2_7_10_11 | 26.4657 | -358.19  | 0.644275  | 0 | -0.095643861 | 0 | 0.17252099   |
| cov1_2_6_7_10  | 26.4658 | -358.19  | 0.6438427 | 0 | -0.091821857 | 0 | 0.17285276   |
| cov2_4_6_10_11 | 26.4746 | -358.195 | 0.6680668 | 0 | 0            | 0 | -0.022395555 |
| cov2_6_8_9_11  | 26.4818 | -358.198 | 0.6464589 | 0 | 0            | 0 | 0.14887288   |
| cov2_5_7_9_10  | 26.4951 | -358.205 | 0.6453902 | 0 | 0            | 0 | 0.094068308  |
| cov1_4_5_6_11  | 26.5041 | -358.209 | 0.6581844 | 0 | 0.13188568   | 0 | 0            |
| cov2_6_7_8_10  | 26.508  | -358.211 | 0.6460074 | 0 | 0            | 0 | 0.14493851   |
| cov1_2_4_5_6   | 26.51   | -358.212 | 0.6576875 | 0 | 0.16224136   | 0 | -0.072873043 |
| cov2_5_6_7_10  | 26.5152 | -358.215 | 0.6471833 | 0 | 0            | 0 | 0.13063019   |
| cov1_3_4_7_8   | 26.5175 | -358.216 | 0.6492724 | 0 | -0.011045414 | 0 | 0            |
| cov3_4_7_8_11  | 26.5222 | -358.218 | 0.6497261 | 0 | 0            | 0 | 0            |
| cov1_2_4_7_11  | 26.5238 | -358.219 | 0.6471519 | 0 | -0.098145308 | 0 | 0.10047529   |
| cov3_4_6_7_8   | 26.5242 | -358.219 | 0.649397  | 0 | 0            | 0 | 0            |
| cov1_2_4_6_7   | 26.5255 | -358.22  | 0.646677  | 0 | -0.10722961  | 0 | 0.099687818  |

|                |         |          |           |   |              |   |              |
|----------------|---------|----------|-----------|---|--------------|---|--------------|
| cov2_5_7_9_11  | 26.5371 | -358.226 | 0.6507297 | 0 | 0            | 0 | 0.10571749   |
| cov2_5_7_8_9   | 26.5762 | -358.245 | 0.6480774 | 0 | 0            | 0 | 0.092536525  |
| cov1_2_6_8_10  | 26.591  | -358.253 | 0.6442148 | 0 | -0.088824557 | 0 | 0.17305594   |
| cov1_2_8_10_11 | 26.5911 | -358.253 | 0.6447728 | 0 | -0.094217405 | 0 | 0.17259312   |
| cov2_6_7_10_11 | 26.5935 | -358.254 | 0.6469342 | 0 | 0            | 0 | 0.14972666   |
| cov2_5_8_9_10  | 26.6198 | -358.267 | 0.6457456 | 0 | 0            | 0 | 0.094206696  |
| cov2_5_6_8_10  | 26.6268 | -358.271 | 0.6474785 | 0 | 0            | 0 | 0.13132682   |
| cov1_3_4_6_7   | 26.6283 | -358.271 | 0.6491913 | 0 | -0.031151774 | 0 | 0            |
| cov2_4_6_7_8   | 26.6288 | -358.272 | 0.6488534 | 0 | 0            | 0 | 0.071334749  |
| cov1_2_4_8_11  | 26.631  | -358.273 | 0.6475764 | 0 | -0.097104256 | 0 | 0.099960321  |
| cov2_7_8_10_11 | 26.6313 | -358.273 | 0.6505823 | 0 | 0            | 0 | 0.11751363   |
| cov1_2_4_6_8   | 26.6345 | -358.275 | 0.6469887 | 0 | -0.10471398  | 0 | 0.099253576  |
| cov1_3_4_7_11  | 26.6392 | -358.277 | 0.6491717 | 0 | -0.012159523 | 0 | 0            |
| cov3_4_6_7_11  | 26.6443 | -358.279 | 0.649786  | 0 | 0            | 0 | 0            |
| cov2_5_8_9_11  | 26.6531 | -358.284 | 0.6511601 | 0 | 0            | 0 | 0.10623253   |
| cov1_3_5_7_8   | 26.6939 | -358.304 | 0.6392844 | 0 | 0.31987365   | 0 | 0            |
| cov2_4_6_7_11  | 26.6974 | -358.306 | 0.6501332 | 0 | 0            | 0 | 0.0764853    |
| cov1_3_4_6_8   | 26.6979 | -358.306 | 0.6493549 | 0 | -0.027813471 | 0 | 0            |
| cov2_6_8_10_11 | 26.7072 | -358.311 | 0.6472742 | 0 | 0            | 0 | 0.15090156   |
| cov1_3_4_8_11  | 26.7074 | -358.311 | 0.6494132 | 0 | -0.00927003  | 0 | 0            |
| cov3_4_6_8_11  | 26.7098 | -358.312 | 0.64996   | 0 | 0            | 0 | 0            |
| cov2_4_7_8_11  | 26.7123 | -358.313 | 0.6532707 | 0 | 0            | 0 | 0.051282621  |
| cov1_4_6_7_8   | 26.7468 | -358.331 | 0.6505472 | 0 | -0.062011142 | 0 | 0            |
| cov2_5_7_10_11 | 26.7476 | -358.331 | 0.6511391 | 0 | 0            | 0 | 0.11108746   |
| cov1_3_5_6_8   | 26.7494 | -358.332 | 0.6397393 | 0 | 0.27559042   | 0 | 0            |
| cov1_5_7_9_10  | 26.7518 | -358.333 | 0.6466514 | 0 | -0.098324369 | 0 | 0            |
| cov1_4_7_8_11  | 26.7547 | -358.335 | 0.6507645 | 0 | -0.042870188 | 0 | 0            |
| cov1_3_5_6_7   | 26.7676 | -358.341 | 0.6397909 | 0 | 0.27041943   | 0 | 0            |
| cov2_4_5_6_11  | 26.7683 | -358.341 | 0.6568067 | 0 | 0            | 0 | -0.006803386 |
| cov2_5_7_8_10  | 26.7706 | -358.343 | 0.6485815 | 0 | 0            | 0 | 0.098605927  |
| cov1_3_5_6_11  | 26.7936 | -358.354 | 0.6395412 | 0 | 0.24701355   | 0 | 0            |
| cov2_4_6_8_11  | 26.795  | -358.355 | 0.6504256 | 0 | 0            | 0 | 0.076836133  |
| cov1_5_7_8_9   | 26.7959 | -358.355 | 0.6488876 | 0 | -0.10202698  | 0 | 0            |
| cov4_6_7_8_11  | 26.811  | -358.363 | 0.6521567 | 0 | 0            | 0 | 0            |
| cov1_3_5_8_11  | 26.8253 | -358.37  | 0.6387061 | 0 | 0.32100605   | 0 | 0            |
| cov1_3_5_7_11  | 26.8398 | -358.377 | 0.6387241 | 0 | 0.31476019   | 0 | 0            |
| cov1_4_6_7_11  | 26.86   | -358.387 | 0.6506924 | 0 | -0.056513322 | 0 | 0            |
| cov2_5_8_10_11 | 26.8641 | -358.389 | 0.6515667 | 0 | 0            | 0 | 0.11160871   |
| cov5_7_8_9_10  | 26.8728 | -358.394 | 0.648163  | 0 | 0            | 0 | 0            |
| cov5_6_7_9_10  | 26.8793 | -358.397 | 0.6475185 | 0 | 0            | 0 | 0            |
| cov1_5_8_9_10  | 26.8804 | -358.397 | 0.6470316 | 0 | -0.097820449 | 0 | 0            |
| cov1_5_6_7_9   | 26.9148 | -358.415 | 0.6487339 | 0 | -0.097565692 | 0 | 0            |
| cov1_5_7_9_11  | 26.9155 | -358.415 | 0.6486645 | 0 | -0.10299284  | 0 | 0            |
| cov5_6_7_8_9   | 26.9406 | -358.428 | 0.6498501 | 0 | 0            | 0 | 0            |
| cov5_7_9_10_11 | 26.9447 | -358.43  | 0.6496005 | 0 | 0            | 0 | 0            |
| cov1_4_6_8_11  | 26.9654 | -358.44  | 0.6510796 | 0 | -0.053543416 | 0 | 0            |
| cov5_6_8_9_10  | 26.9987 | -358.457 | 0.6478479 | 0 | 0            | 0 | 0            |

|                 |         |          |           |   |              |   |            |
|-----------------|---------|----------|-----------|---|--------------|---|------------|
| cov5_7_8_9_11   | 27.0081 | -358.461 | 0.6520077 | 0 | 0            | 0 | 0          |
| cov5_6_7_9_11   | 27.042  | -358.478 | 0.650454  | 0 | 0            | 0 | 0          |
| cov1_5_6_8_9    | 27.0427 | -358.479 | 0.6491155 | 0 | -0.094358668 | 0 | 0          |
| cov1_5_8_9_11   | 27.0446 | -358.48  | 0.6491718 | 0 | -0.101215    | 0 | 0          |
| cov5_8_9_10_11  | 27.0661 | -358.49  | 0.6500352 | 0 | 0            | 0 | 0          |
| cov1_5_7_8_10   | 27.1215 | -358.518 | 0.6502065 | 0 | -0.087973059 | 0 | 0          |
| cov5_6_8_9_11   | 27.16   | -358.537 | 0.6508429 | 0 | 0            | 0 | 0          |
| cov1_7_8_9_10   | 27.1757 | -358.545 | 0.6465012 | 0 | 0.035182617  | 0 | 0          |
| cov6_7_8_9_10   | 27.1785 | -358.547 | 0.6463067 | 0 | 0            | 0 | 0          |
| cov5_6_7_8_10   | 27.2351 | -358.575 | 0.6509577 | 0 | 0            | 0 | 0          |
| cov1_5_6_7_10   | 27.2404 | -358.577 | 0.6500905 | 0 | -0.085907506 | 0 | 0          |
| cov1_5_7_10_11  | 27.2404 | -358.578 | 0.6499831 | 0 | -0.089404921 | 0 | 0          |
| cov7_8_9_10_11  | 27.2501 | -358.582 | 0.6435632 | 0 | 0            | 0 | 0          |
| cov5_7_8_10_11  | 27.2811 | -358.598 | 0.6526969 | 0 | 0            | 0 | 0          |
| cov1_3_4_6_11   | 27.2917 | -358.603 | 0.6536246 | 0 | 0.005727736  | 0 | 0          |
| cov1_6_7_9_10   | 27.2932 | -358.604 | 0.6463834 | 0 | 0.023720378  | 0 | 0          |
| cov1_7_9_10_11  | 27.2965 | -358.606 | 0.6464438 | 0 | 0.035625092  | 0 | 0          |
| cov6_7_9_10_11  | 27.3053 | -358.61  | 0.6458881 | 0 | 0            | 0 | 0          |
| cov1_3_4_5_8_9  | 27.3193 | -355.22  | 0.6343252 | 0 | 0.20285009   | 0 | 0          |
| cov5_6_7_10_11  | 27.3397 | -358.627 | 0.651446  | 0 | 0            | 0 | 0          |
| cov1_3_4_5_7_9  | 27.3651 | -355.243 | 0.6343686 | 0 | 0.19759302   | 0 | 0          |
| cov1_5_6_8_10   | 27.3685 | -358.642 | 0.6504682 | 0 | -0.082694872 | 0 | 0          |
| cov1_5_8_10_11  | 27.3693 | -358.642 | 0.650484  | 0 | -0.087596053 | 0 | 0          |
| cov1_6_7_8_9    | 27.3868 | -358.651 | 0.648969  | 0 | 0.023045214  | 0 | 0          |
| cov1_7_8_9_11   | 27.3923 | -358.653 | 0.648938  | 0 | 0.037207334  | 0 | 0          |
| cov6_7_8_9_11   | 27.3976 | -358.656 | 0.6484661 | 0 | 0            | 0 | 0          |
| cov1_6_8_9_10   | 27.4208 | -358.668 | 0.6467701 | 0 | 0.026885605  | 0 | 0          |
| cov1_8_9_10_11  | 27.4222 | -358.668 | 0.6469418 | 0 | 0.037084054  | 0 | 0          |
| cov6_8_9_10_11  | 27.4368 | -358.676 | 0.646288  | 0 | 0            | 0 | 0          |
| cov5_6_8_10_11  | 27.459  | -358.687 | 0.6518361 | 0 | 0            | 0 | 0          |
| cov3_5_6_7_8    | 27.4734 | -358.694 | 0.6441849 | 0 | 0            | 0 | 0          |
| cov1_2_6_7_8    | 27.4813 | -358.698 | 0.6438112 | 0 | -0.086549958 | 0 | 0.18638768 |
| cov1_2_7_8_11   | 27.4815 | -358.698 | 0.6444505 | 0 | -0.066280068 | 0 | 0.18813584 |
| cov1_2_5_7_8    | 27.4868 | -358.701 | 0.6437683 | 0 | -0.072513914 | 0 | 0.18766981 |
| cov1_3_4_5_9_10 | 27.5001 | -355.31  | 0.6331588 | 0 | 0.1304133    | 0 | 0          |
| cov1_6_7_9_11   | 27.5109 | -358.713 | 0.6488637 | 0 | 0.02689269   | 0 | 0          |
| cov1_3_4_5_8_10 | 27.5635 | -355.342 | 0.6355081 | 0 | 0.21720211   | 0 | 0          |
| cov2_5_7_8_11   | 27.5709 | -358.743 | 0.6467269 | 0 | 0            | 0 | 0.16362089 |
| cov2_6_7_8_11   | 27.5819 | -358.748 | 0.6469055 | 0 | 0            | 0 | 0.16529033 |
| cov2_5_6_7_8    | 27.5839 | -358.749 | 0.6446924 | 0 | 0            | 0 | 0.16743858 |
| cov1_2_6_7_11   | 27.5906 | -358.753 | 0.6444139 | 0 | -0.077658201 | 0 | 0.18689684 |
| cov1_2_5_7_11   | 27.5947 | -358.755 | 0.6443023 | 0 | -0.066522    | 0 | 0.18788741 |
| cov1_2_5_6_7    | 27.5966 | -358.756 | 0.6436647 | 0 | -0.082808834 | 0 | 0.18654421 |
| cov3_5_6_7_11   | 27.6003 | -358.757 | 0.6416384 | 0 | 0            | 0 | 0          |
| cov1_3_4_5_9_11 | 27.6022 | -355.361 | 0.633619  | 0 | 0.11782356   | 0 | 0          |
| cov1_3_4_5_7_10 | 27.6098 | -355.365 | 0.6355509 | 0 | 0.21200536   | 0 | 0          |
| cov1_3_4_5_6_9  | 27.6165 | -355.368 | 0.6350049 | 0 | 0.1396272    | 0 | 0          |

|                  |         |          |           |   |              |   |              |
|------------------|---------|----------|-----------|---|--------------|---|--------------|
| cov1_2_3_4_5_9   | 27.6175 | -355.369 | 0.6353515 | 0 | 0.13637326   | 0 | -0.011782488 |
| cov3_5_6_8_11    | 27.6271 | -358.771 | 0.6417394 | 0 | 0            | 0 | 0            |
| cov1_6_8_9_11    | 27.6385 | -358.777 | 0.6493547 | 0 | 0.030901029  | 0 | 0            |
| cov1_6_7_8_10    | 27.6415 | -358.778 | 0.6499829 | 0 | 0.026939217  | 0 | 0            |
| cov1_7_8_10_11   | 27.6485 | -358.782 | 0.6499225 | 0 | 0.042658468  | 0 | 0            |
| cov6_7_8_10_11   | 27.6562 | -358.785 | 0.6493934 | 0 | 0            | 0 | 0            |
| cov2_5_6_7_11    | 27.6685 | -358.792 | 0.645832  | 0 | 0            | 0 | 0.17122122   |
| cov1_3_6_7_8     | 27.6877 | -358.801 | 0.6470854 | 0 | 0.064340538  | 0 | 0            |
| cov1_2_6_8_11    | 27.7137 | -358.814 | 0.6448417 | 0 | -0.073917032 | 0 | 0.18715004   |
| cov1_2_5_8_11    | 27.7163 | -358.815 | 0.6447452 | 0 | -0.065119412 | 0 | 0.18792612   |
| cov1_2_5_6_8     | 27.7216 | -358.818 | 0.6439875 | 0 | -0.079789104 | 0 | 0.18674645   |
| cov1_3_7_8_11    | 27.7415 | -358.828 | 0.6465301 | 0 | 0.10710263   | 0 | 0            |
| cov3_4_5_6_9_10  | 27.7538 | -355.437 | 0.6341248 | 0 | 0            | 0 | 0            |
| cov3_4_5_9_10_11 | 27.763  | -355.442 | 0.6316153 | 0 | 0            | 0 | 0            |
| cov1_6_7_10_11   | 27.7651 | -358.84  | 0.6498595 | 0 | 0.030646161  | 0 | 0            |
| cov3_6_7_8_11    | 27.7727 | -358.844 | 0.6460355 | 0 | 0            | 0 | 0            |
| cov2_3_4_5_9_10  | 27.7806 | -355.45  | 0.632962  | 0 | 0            | 0 | 0.047006082  |
| cov3_4_5_6_8_9   | 27.7823 | -355.451 | 0.6358723 | 0 | 0            | 0 | 0            |
| cov2_5_6_8_11    | 27.7844 | -358.849 | 0.6461748 | 0 | 0            | 0 | 0.17219098   |
| cov3_4_5_7_8_9   | 27.7969 | -355.458 | 0.6365208 | 0 | 0            | 0 | 0            |
| cov3_4_5_6_7_9   | 27.8074 | -355.464 | 0.635871  | 0 | 0            | 0 | 0            |
| cov3_4_5_6_9_11  | 27.8113 | -355.466 | 0.633457  | 0 | 0            | 0 | 0            |
| cov2_3_4_5_9_11  | 27.8224 | -355.471 | 0.6322854 | 0 | 0            | 0 | 0.035804354  |
| cov1_3_6_7_11    | 27.8316 | -358.873 | 0.6469702 | 0 | 0.068850298  | 0 | 0            |
| cov2_3_4_5_8_9   | 27.835  | -355.477 | 0.6344458 | 0 | 0            | 0 | 0.057254438  |
| cov3_4_5_8_9_11  | 27.8354 | -355.478 | 0.6331414 | 0 | 0            | 0 | 0            |
| cov2_3_4_5_6_9   | 27.8405 | -355.48  | 0.6348362 | 0 | 0            | 0 | 0.030052807  |
| cov3_4_5_8_9_10  | 27.8422 | -355.481 | 0.6349214 | 0 | 0            | 0 | 0            |
| cov3_4_5_7_9_11  | 27.848  | -355.484 | 0.6331511 | 0 | 0            | 0 | 0            |
| cov3_4_5_7_9_10  | 27.8516 | -355.486 | 0.6348841 | 0 | 0            | 0 | 0            |
| cov2_3_4_5_7_9   | 27.853  | -355.486 | 0.634487  | 0 | 0            | 0 | 0.055325634  |
| cov1_3_4_5_10_11 | 27.8542 | -355.487 | 0.6348017 | 0 | 0.13081878   | 0 | 0            |
| cov1_3_4_5_6_10  | 27.8714 | -355.496 | 0.636219  | 0 | 0.15101195   | 0 | 0            |
| cov1_2_3_4_5_10  | 27.8719 | -355.496 | 0.6365194 | 0 | 0.14869905   | 0 | -0.010175664 |
| cov1_3_6_8_11    | 27.8756 | -358.895 | 0.6472089 | 0 | 0.070999495  | 0 | 0            |
| cov1_6_8_10_11   | 27.893  | -358.904 | 0.6503454 | 0 | 0.034654213  | 0 | 0            |
| cov3_4_5_6_8_10  | 28.0859 | -355.603 | 0.6374221 | 0 | 0            | 0 | 0            |
| cov3_4_5_6_10_11 | 28.1035 | -355.612 | 0.6348338 | 0 | 0            | 0 | 0            |
| cov3_4_5_6_7_10  | 28.1104 | -355.615 | 0.6374113 | 0 | 0            | 0 | 0            |
| cov2_3_4_5_10_11 | 28.1199 | -355.62  | 0.6334731 | 0 | 0            | 0 | 0.042038587  |
| cov2_3_4_5_6_10  | 28.1302 | -355.625 | 0.6361091 | 0 | 0            | 0 | 0.034514224  |
| cov3_4_5_7_8_10  | 28.1353 | -355.628 | 0.6382411 | 0 | 0            | 0 | 0            |
| cov2_3_4_5_8_10  | 28.1493 | -355.635 | 0.635866  | 0 | 0            | 0 | 0.063548593  |
| cov3_4_5_8_10_11 | 28.1574 | -355.639 | 0.6345616 | 0 | 0            | 0 | 0            |
| cov2_3_4_5_7_10  | 28.1661 | -355.643 | 0.6359002 | 0 | 0            | 0 | 0.061612929  |
| cov3_4_5_7_10_11 | 28.1682 | -355.644 | 0.6345797 | 0 | 0            | 0 | 0            |
| cov3_5_7_8_11    | 28.4299 | -359.172 | 0.6398711 | 0 | 0            | 0 | 0            |

|                  |         |          |           |   |              |   |             |
|------------------|---------|----------|-----------|---|--------------|---|-------------|
| cov1_2_5_9_11    | 28.8674 | -359.391 | 0.6638464 | 0 | -0.15579254  | 0 | 0.16707047  |
| cov1_3_4_5_7_8   | 28.9218 | -356.021 | 0.6347422 | 0 | 0.35785188   | 0 | 0           |
| cov1_2_5_9_10    | 28.9868 | -359.451 | 0.6578178 | 0 | -0.19842982  | 0 | 0.16349339  |
| cov1_2_9_10_11   | 28.9898 | -359.452 | 0.6604212 | 0 | -0.058140888 | 0 | 0.17550664  |
| cov1_6_7_8_11    | 28.9974 | -359.456 | 0.6509822 | 0 | 0.050444658  | 0 | 0           |
| cov1_5_6_7_8     | 28.9979 | -359.456 | 0.6506605 | 0 | 0.042533406  | 0 | 0           |
| cov1_3_4_5_6_8   | 29.0041 | -356.062 | 0.6347337 | 0 | 0.33743733   | 0 | 0           |
| cov1_3_4_5_8_11  | 29.0212 | -356.071 | 0.6341478 | 0 | 0.35826395   | 0 | 0           |
| cov1_2_3_4_5_8   | 29.0229 | -356.071 | 0.6344233 | 0 | 0.35760206   | 0 | 0.006928715 |
| cov5_6_7_8_11    | 29.0277 | -359.471 | 0.6505161 | 0 | 0            | 0 | 0           |
| cov1_5_7_8_11    | 29.039  | -359.477 | 0.6507081 | 0 | 0.082571207  | 0 | 0           |
| cov1_3_4_5_6_7   | 29.0493 | -356.085 | 0.6347855 | 0 | 0.33381847   | 0 | 0           |
| cov1_3_4_5_7_11  | 29.0635 | -356.092 | 0.6341679 | 0 | 0.35279158   | 0 | 0           |
| cov1_2_3_4_5_7   | 29.0656 | -356.093 | 0.6344781 | 0 | 0.35242315   | 0 | 0.007030336 |
| cov2_6_9_10_11   | 29.0672 | -359.491 | 0.6625206 | 0 | 0            | 0 | 0.15577617  |
| cov2_5_9_10_11   | 29.0706 | -359.493 | 0.665173  | 0 | 0            | 0 | 0.12718383  |
| cov1_5_6_7_11    | 29.1149 | -359.515 | 0.6508782 | 0 | 0.04842009   | 0 | 0           |
| cov1_2_4_6_11    | 29.1501 | -359.532 | 0.6642722 | 0 | -0.086205992 | 0 | 0.086942489 |
| cov1_2_5_6_9     | 29.1547 | -359.535 | 0.6601375 | 0 | -0.19489189  | 0 | 0.16349768  |
| cov2_5_6_9_11    | 29.1653 | -359.54  | 0.6667754 | 0 | 0            | 0 | 0.14054683  |
| cov1_2_5_10_11   | 29.1776 | -359.546 | 0.6649372 | 0 | -0.14281608  | 0 | 0.16916685  |
| cov1_2_6_9_11    | 29.2092 | -359.562 | 0.6628948 | 0 | -0.068010475 | 0 | 0.17429129  |
| cov1_5_6_8_11    | 29.242  | -359.578 | 0.6513051 | 0 | 0.0524211    | 0 | 0           |
| cov1_2_6_9_10    | 29.2877 | -359.601 | 0.656878  | 0 | -0.10830699  | 0 | 0.17104943  |
| cov1_3_4_5_6_11  | 29.2965 | -356.208 | 0.6345723 | 0 | 0.26294143   | 0 | 0           |
| cov1_2_3_4_5_11  | 29.3032 | -356.212 | 0.6341797 | 0 | 0.27349057   | 0 | 0.008363634 |
| cov1_2_3_4_5_6   | 29.3064 | -356.213 | 0.6353298 | 0 | 0.26271551   | 0 | 0.008204964 |
| cov1_2_3_4_9_10  | 29.3389 | -356.229 | 0.6377534 | 0 | -0.13831465  | 0 | 0.087115735 |
| cov1_2_3_4_7_9   | 29.3603 | -356.24  | 0.6388325 | 0 | -0.14157903  | 0 | 0.077953786 |
| cov1_2_3_4_8_9   | 29.3794 | -356.25  | 0.6388795 | 0 | -0.14077259  | 0 | 0.079453479 |
| cov1_3_4_7_8_9   | 29.38   | -356.25  | 0.6414467 | 0 | -0.11209689  | 0 | 0           |
| cov1_2_3_4_6_9   | 29.397  | -356.258 | 0.639073  | 0 | -0.11191931  | 0 | 0.087039329 |
| cov1_2_3_4_9_11  | 29.4175 | -356.269 | 0.6392184 | 0 | -0.13621597  | 0 | 0.086031142 |
| cov2_5_6_10_11   | 29.4356 | -359.675 | 0.6674513 | 0 | 0            | 0 | 0.14429448  |
| cov1_3_4_7_9_10  | 29.4462 | -356.283 | 0.640041  | 0 | -0.113481    | 0 | 0           |
| cov2_5_6_9_10    | 29.4545 | -359.685 | 0.6606028 | 0 | 0            | 0 | 0.12898992  |
| cov1_2_6_10_11   | 29.461  | -359.688 | 0.6638037 | 0 | -0.065093635 | 0 | 0.1756441   |
| cov1_2_5_6_10    | 29.4635 | -359.689 | 0.6612775 | 0 | -0.18412145  | 0 | 0.16538226  |
| cov1_3_4_8_9_10  | 29.4735 | -356.297 | 0.6401424 | 0 | -0.11208062  | 0 | 0           |
| cov1_3_4_6_7_9   | 29.5127 | -356.316 | 0.6414586 | 0 | -0.088267892 | 0 | 0           |
| cov3_4_6_7_8_9   | 29.5267 | -356.323 | 0.6423418 | 0 | 0            | 0 | 0           |
| cov1_3_4_7_9_11  | 29.529  | -356.325 | 0.6409556 | 0 | -0.11676109  | 0 | 0           |
| cov1_3_4_6_8_9   | 29.5379 | -356.329 | 0.6415392 | 0 | -0.086550532 | 0 | 0           |
| cov2_3_4_6_9_10  | 29.5422 | -356.331 | 0.6394978 | 0 | 0            | 0 | 0.06332985  |
| cov1_3_4_6_9_10  | 29.5434 | -356.332 | 0.6408244 | 0 | -0.08139198  | 0 | 0           |
| cov1_3_4_8_9_11  | 29.5553 | -356.338 | 0.6411171 | 0 | -0.11464779  | 0 | 0           |
| cov1_3_4_9_10_11 | 29.558  | -356.339 | 0.6409452 | 0 | -0.10192248  | 0 | 0           |



|                  |         |          |           |   |              |   |              |
|------------------|---------|----------|-----------|---|--------------|---|--------------|
| cov2_3_4_6_7_9   | 29.5669 | -356.343 | 0.6406289 | 0 | 0            | 0 | 0.054792569  |
| cov3_4_6_7_9_10  | 29.579  | -356.349 | 0.6409935 | 0 | 0            | 0 | 0            |
| cov2_3_4_6_8_9   | 29.5818 | -356.351 | 0.640639  | 0 | 0            | 0 | 0.05625827   |
| cov2_3_4_6_9_11  | 29.5992 | -356.36  | 0.6418059 | 0 | 0            | 0 | 0.064595109  |
| cov3_4_6_8_9_10  | 29.6002 | -356.36  | 0.6410557 | 0 | 0            | 0 | 0            |
| cov1_3_4_6_9_11  | 29.6159 | -356.368 | 0.6419482 | 0 | -0.08092527  | 0 | 0            |
| cov3_4_6_7_9_11  | 29.6547 | -356.387 | 0.6428022 | 0 | 0            | 0 | 0            |
| cov3_4_6_9_10_11 | 29.658  | -356.389 | 0.6424209 | 0 | 0            | 0 | 0            |
| cov2_3_5_7_8_9   | 29.6608 | -356.39  | 0.6319916 | 0 | 0            | 0 | 0.19231805   |
| cov3_4_6_8_9_11  | 29.6742 | -356.397 | 0.6428926 | 0 | 0            | 0 | 0            |
| cov2_3_5_8_9_10  | 29.6923 | -356.406 | 0.6303697 | 0 | 0            | 0 | 0.19428499   |
| cov1_2_3_4_7_10  | 29.6967 | -356.408 | 0.6405098 | 0 | -0.13550701  | 0 | 0.081500981  |
| cov2_3_5_7_9_10  | 29.7159 | -356.418 | 0.630382  | 0 | 0            | 0 | 0.19259302   |
| cov1_2_3_4_8_10  | 29.7164 | -356.418 | 0.6405618 | 0 | -0.13469335  | 0 | 0.082995617  |
| cov1_3_4_7_8_10  | 29.7333 | -356.427 | 0.6432743 | 0 | -0.10466074  | 0 | 0            |
| cov1_2_3_4_6_10  | 29.7389 | -356.429 | 0.6407844 | 0 | -0.10724585  | 0 | 0.090690875  |
| cov1_2_3_4_10_11 | 29.7571 | -356.439 | 0.6408848 | 0 | -0.1303928   | 0 | 0.089748047  |
| cov4_5_7_8_9_10  | 29.77   | -356.445 | 0.6437778 | 0 | 0            | 0 | 0            |
| cov2_4_5_7_9_10  | 29.779  | -356.449 | 0.6451831 | 0 | 0            | 0 | -0.053329607 |
| cov2_3_5_6_9_10  | 29.7819 | -356.451 | 0.6304576 | 0 | 0            | 0 | 0.18420682   |
| cov1_2_3_5_9_10  | 29.7836 | -356.452 | 0.6305039 | 0 | -0.011244837 | 0 | 0.18433362   |
| cov2_3_5_9_10_11 | 29.784  | -356.452 | 0.6300849 | 0 | 0            | 0 | 0.18026346   |
| cov1_2_3_5_8_9   | 29.7875 | -356.454 | 0.6318777 | 0 | 0.027762373  | 0 | 0.18869455   |
| cov2_3_5_8_9_11  | 29.7948 | -356.457 | 0.6314131 | 0 | 0            | 0 | 0.19292265   |
| cov2_3_5_6_8_9   | 29.7971 | -356.459 | 0.6319776 | 0 | 0            | 0 | 0.19308798   |
| cov2_4_5_7_8_9   | 29.8149 | -356.467 | 0.647737  | 0 | 0            | 0 | -0.05587194  |
| cov1_2_3_5_7_9   | 29.8162 | -356.468 | 0.6319206 | 0 | 0.022443121  | 0 | 0.18808      |
| cov2_3_5_7_9_11  | 29.8199 | -356.47  | 0.6314482 | 0 | 0            | 0 | 0.1912536    |
| cov2_3_5_6_7_9   | 29.8229 | -356.471 | 0.6319953 | 0 | 0            | 0 | 0.19197611   |
| cov4_5_6_7_9_10  | 29.8257 | -356.473 | 0.6437396 | 0 | 0            | 0 | 0            |
| cov3_4_7_8_9_11  | 29.8273 | -356.474 | 0.6465349 | 0 | 0            | 0 | 0            |
| cov1_4_5_7_9_10  | 29.8285 | -356.474 | 0.6432524 | 0 | -0.053648757 | 0 | 0            |
| cov3_4_6_7_8_10  | 29.8629 | -356.491 | 0.6440382 | 0 | 0            | 0 | 0            |
| cov1_4_5_7_8_9   | 29.8654 | -356.493 | 0.6457133 | 0 | -0.057693542 | 0 | 0            |
| cov2_4_5_8_9_10  | 29.8654 | -356.493 | 0.645498  | 0 | 0            | 0 | -0.053949103 |
| cov1_3_4_6_7_10  | 29.8675 | -356.494 | 0.6432763 | 0 | -0.082479169 | 0 | 0            |
| cov4_5_6_7_8_9   | 29.8723 | -356.496 | 0.6462481 | 0 | 0            | 0 | 0            |
| cov1_3_4_7_10_11 | 29.8808 | -356.5   | 0.6427176 | 0 | -0.10992717  | 0 | 0            |
| cov4_5_7_9_10_11 | 29.8821 | -356.501 | 0.6446863 | 0 | 0            | 0 | 0            |
| cov2_3_4_6_7_10  | 29.8887 | -356.504 | 0.6421568 | 0 | 0            | 0 | 0.05910468   |
| cov2_3_4_9_10_11 | 29.8906 | -356.505 | 0.6450806 | 0 | 0            | 0 | 0.03227512   |
| cov2_3_5_6_9_11  | 29.8925 | -356.506 | 0.6314341 | 0 | 0            | 0 | 0.18297233   |
| cov1_3_4_6_8_10  | 29.8934 | -356.507 | 0.6433607 | 0 | -0.080732205 | 0 | 0            |
| cov1_2_3_5_9_11  | 29.8947 | -356.507 | 0.6315151 | 0 | -0.018277077 | 0 | 0.18374326   |
| cov1_2_3_5_6_9   | 29.8971 | -356.509 | 0.632158  | 0 | -0.005429653 | 0 | 0.18464819   |
| cov3_4_7_9_10_11 | 29.898  | -356.509 | 0.6452975 | 0 | 0            | 0 | 0            |
| cov3_4_7_8_9_10  | 29.9005 | -356.51  | 0.6426614 | 0 | 0            | 0 | 0            |

|                  |         |          |           |   |              |              |
|------------------|---------|----------|-----------|---|--------------|--------------|
| cov2_3_4_6_8_10  | 29.9041 | -356.512 | 0.6421723 | 0 | 0            | 0.060582473  |
| cov1_5_9_10_11   | 29.9067 | -359.911 | 0.6671    | 0 | -0.035617844 | 0            |
| cov1_3_4_8_10_11 | 29.908  | -356.514 | 0.6428835 | 0 | -0.10781363  | 0            |
| cov3_4_8_9_10_11 | 29.9101 | -356.515 | 0.6453653 | 0 | 0            | 0            |
| cov4_5_6_8_9_10  | 29.9114 | -356.516 | 0.6440268 | 0 | 0            | 0            |
| cov1_4_5_8_9_10  | 29.9194 | -356.52  | 0.6435585 | 0 | -0.052996386 | 0            |
| cov2_4_5_6_7_9   | 29.9249 | -356.522 | 0.6472796 | 0 | 0            | -0.044894949 |
| cov2_3_4_6_10_11 | 29.9258 | -356.523 | 0.6432833 | 0 | 0            | 0.069027612  |
| cov2_3_5_7_8_10  | 29.9293 | -356.525 | 0.6332622 | 0 | 0            | 0.1970274    |
| cov4_5_7_8_9_11  | 29.93   | -356.525 | 0.6472942 | 0 | 0            | 0            |
| cov5_6_9_10_11   | 29.9331 | -359.924 | 0.667831  | 0 | 0            | 0            |
| cov1_2_4_5_7_9   | 29.9389 | -356.529 | 0.6471484 | 0 | -0.019912797 | -0.046412879 |
| cov1_2_3_7_8_9   | 29.9427 | -356.531 | 0.6349771 | 0 | -0.09807009  | 0.17639714   |
| cov2_4_5_7_9_11  | 29.9446 | -356.532 | 0.6477233 | 0 | 0            | -0.05505667  |
| cov2_3_4_7_9_11  | 29.9588 | -356.539 | 0.6461888 | 0 | 0            | 0.026128835  |
| cov2_3_4_8_9_11  | 29.9661 | -356.543 | 0.646221  | 0 | 0            | 0.028099518  |
| cov4_5_8_9_10_11 | 29.969  | -356.544 | 0.6450538 | 0 | 0            | 0            |
| cov2_3_4_7_8_9   | 29.9726 | -356.546 | 0.6437131 | 0 | 0            | 0.007442389  |
| cov1_3_4_6_10_11 | 29.9764 | -356.548 | 0.6437738 | 0 | -0.075139248 | 0            |
| cov1_4_5_6_7_9   | 29.9765 | -356.548 | 0.645797  | 0 | -0.034199553 | 0            |
| cov4_5_6_7_9_11  | 29.9922 | -356.556 | 0.6463303 | 0 | 0            | 0            |
| cov3_4_6_7_10_11 | 29.9926 | -356.556 | 0.6443817 | 0 | 0            | 0            |
| cov1_4_5_7_9_11  | 29.9945 | -356.557 | 0.6456397 | 0 | -0.057361109 | 0            |
| cov1_2_3_6_9_10  | 30.0013 | -356.561 | 0.6334872 | 0 | -0.084001888 | 0.17761529   |
| cov1_2_3_7_9_10  | 30.0078 | -356.564 | 0.6334999 | 0 | -0.099365802 | 0.17632858   |
| cov1_2_3_8_9_10  | 30.0082 | -356.564 | 0.6336219 | 0 | -0.09920835  | 0.17644836   |
| cov1_2_3_9_10_11 | 30.0084 | -356.564 | 0.6335232 | 0 | -0.099775476 | 0.17636868   |
| cov2_4_5_6_8_9   | 30.01   | -356.565 | 0.6475772 | 0 | 0            | -0.045107229 |
| cov3_4_6_8_10_11 | 30.0133 | -356.567 | 0.6444757 | 0 | 0            | 0            |
| cov1_2_4_5_8_9   | 30.0265 | -356.573 | 0.6475098 | 0 | -0.018025084 | -0.047932562 |
| cov2_4_5_8_9_11  | 30.0308 | -356.575 | 0.648084  | 0 | 0            | -0.055257881 |
| cov1_2_3_5_8_10  | 30.0444 | -356.582 | 0.633047  | 0 | 0.040780407  | 0.19079342   |
| cov2_3_4_5_6_11  | 30.0448 | -356.582 | 0.6332495 | 0 | 0            | 0.087081832  |
| cov2_3_4_7_9_10  | 30.0524 | -356.586 | 0.6424745 | 0 | 0            | 0.006575711  |
| cov2_3_5_8_10_11 | 30.0613 | -356.591 | 0.6324928 | 0 | 0            | 0.19718708   |
| cov2_3_5_6_8_10  | 30.0631 | -356.592 | 0.6332547 | 0 | 0            | 0.19651221   |
| cov2_3_4_8_9_10  | 30.0643 | -356.592 | 0.6424896 | 0 | 0            | 0.008389205  |
| cov1_4_5_6_8_9   | 30.0645 | -356.592 | 0.6461161 | 0 | -0.031559138 | 0            |
| cov1_5_6_9_11    | 30.0693 | -359.992 | 0.6690965 | 0 | -0.057794743 | 0            |
| cov2_3_6_7_8_9   | 30.0728 | -356.596 | 0.6362947 | 0 | 0            | 0.151771     |
| cov1_2_3_5_7_10  | 30.0738 | -356.597 | 0.6330931 | 0 | 0.035515929  | 0.19018692   |
| cov4_5_6_8_9_11  | 30.0775 | -356.599 | 0.6466658 | 0 | 0            | 0            |
| cov2_3_4_5_6_8   | 30.0809 | -356.6   | 0.6355195 | 0 | 0            | 0.097771744  |
| cov2_3_5_7_10_11 | 30.0853 | -356.603 | 0.632521  | 0 | 0            | 0.19551602   |
| cov1_4_5_8_9_11  | 30.0856 | -356.603 | 0.6460658 | 0 | -0.055549974 | 0            |
| cov2_3_5_6_7_10  | 30.0887 | -356.604 | 0.6332676 | 0 | 0            | 0.19539263   |
| cov2_4_5_7_8_10  | 30.0894 | -356.605 | 0.648622  | 0 | 0            | -0.048334656 |

|                  |         |          |           |   |              |   |              |
|------------------|---------|----------|-----------|---|--------------|---|--------------|
| cov2_3_4_5_6_7   | 30.0931 | -356.607 | 0.6355265 | 0 | 0            | 0 | 0.09621966   |
| cov1_2_3_6_8_9   | 30.0967 | -356.608 | 0.6349781 | 0 | -0.081828326 | 0 | 0.17781361   |
| cov1_2_3_6_9_11  | 30.0971 | -356.609 | 0.6346049 | 0 | -0.083858287 | 0 | 0.1775902    |
| cov1_2_3_6_7_9   | 30.098  | -356.609 | 0.6348756 | 0 | -0.081872242 | 0 | 0.17770501   |
| cov1_2_3_8_9_11  | 30.1042 | -356.612 | 0.6349569 | 0 | -0.098693048 | 0 | 0.17648905   |
| cov1_2_3_7_9_11  | 30.1054 | -356.613 | 0.6347833 | 0 | -0.09946993  | 0 | 0.17632217   |
| cov2_3_6_9_10_11 | 30.1196 | -356.62  | 0.6355775 | 0 | 0            | 0 | 0.15478175   |
| cov2_3_6_7_9_10  | 30.1261 | -356.623 | 0.634834  | 0 | 0            | 0 | 0.15273994   |
| cov2_3_6_8_9_10  | 30.1262 | -356.623 | 0.6349353 | 0 | 0            | 0 | 0.15286299   |
| cov3_4_7_8_10_11 | 30.1304 | -356.625 | 0.6478008 | 0 | 0            | 0 | 0            |
| cov4_5_6_7_8_10  | 30.1408 | -356.63  | 0.6473094 | 0 | 0            | 0 | 0            |
| cov1_4_5_7_8_10  | 30.1415 | -356.631 | 0.6469488 | 0 | -0.043596325 | 0 | 0            |
| cov1_5_6_9_10    | 30.1448 | -360.03  | 0.6637745 | 0 | -0.091039282 | 0 | 0            |
| cov2_3_5_6_10_11 | 30.1546 | -356.637 | 0.632566  | 0 | 0            | 0 | 0.18639039   |
| cov1_2_3_5_10_11 | 30.1567 | -356.638 | 0.6326594 | 0 | -0.006605472 | 0 | 0.18572918   |
| cov1_2_3_5_6_10  | 30.1608 | -356.64  | 0.6333623 | 0 | 0.004786387  | 0 | 0.18651475   |
| cov4_5_7_8_10_11 | 30.1787 | -356.649 | 0.6480158 | 0 | 0            | 0 | 0            |
| cov3_4_5_6_7_8   | 30.1908 | -356.655 | 0.6394549 | 0 | 0            | 0 | 0            |
| cov2_3_7_8_9_10  | 30.2038 | -356.662 | 0.6383233 | 0 | 0            | 0 | 0.095721205  |
| cov2_4_5_6_7_10  | 30.2077 | -356.664 | 0.6482801 | 0 | 0            | 0 | -0.040263169 |
| cov2_3_6_8_9_11  | 30.2099 | -356.665 | 0.6369496 | 0 | 0            | 0 | 0.15550269   |
| cov2_3_6_7_9_11  | 30.2122 | -356.666 | 0.6368071 | 0 | 0            | 0 | 0.15525909   |
| cov1_2_4_5_7_10  | 30.2177 | -356.669 | 0.6483419 | 0 | -0.007049826 | 0 | -0.044962642 |
| cov2_4_5_7_10_11 | 30.2184 | -356.669 | 0.6484691 | 0 | 0            | 0 | -0.048480448 |
| cov1_2_3_7_8_10  | 30.2444 | -356.682 | 0.6366054 | 0 | -0.093093696 | 0 | 0.17792416   |
| cov2_3_4_7_8_10  | 30.2489 | -356.684 | 0.6449946 | 0 | 0            | 0 | 0.013566222  |
| cov2_3_4_7_10_11 | 30.251  | -356.686 | 0.6473509 | 0 | 0            | 0 | 0.031414532  |
| cov1_4_7_8_9_10  | 30.2525 | -356.686 | 0.6445888 | 0 | -0.16424997  | 0 | 0            |
| cov2_3_7_8_9_11  | 30.2536 | -356.687 | 0.6410881 | 0 | 0            | 0 | 0.11858799   |
| cov1_4_5_6_7_10  | 30.2552 | -356.688 | 0.6470136 | 0 | -0.022435665 | 0 | 0            |
| cov2_3_4_8_10_11 | 30.2594 | -356.69  | 0.647389  | 0 | 0            | 0 | 0.03338886   |
| cov4_5_6_7_10_11 | 30.2622 | -356.691 | 0.6472783 | 0 | 0            | 0 | 0            |
| cov1_4_5_7_10_11 | 30.27   | -356.695 | 0.6468433 | 0 | -0.043577094 | 0 | 0            |
| cov3_4_5_6_8_11  | 30.2857 | -356.703 | 0.6363563 | 0 | 0            | 0 | 0            |
| cov3_4_5_6_7_11  | 30.2871 | -356.704 | 0.6362881 | 0 | 0            | 0 | 0            |
| cov2_4_5_6_8_10  | 30.2936 | -356.707 | 0.6485787 | 0 | 0            | 0 | -0.040473195 |
| cov1_6_9_10_11   | 30.3037 | -360.109 | 0.6664954 | 0 | 0.049098061  | 0 | 0            |
| cov1_2_4_5_8_10  | 30.3051 | -356.713 | 0.6486966 | 0 | -0.005163123 | 0 | -0.046476655 |
| cov2_4_5_8_10_11 | 30.3055 | -356.713 | 0.6488365 | 0 | 0            | 0 | -0.048674126 |
| cov2_3_8_9_10_11 | 30.3164 | -356.718 | 0.6399576 | 0 | 0            | 0 | 0.11895443   |
| cov2_3_7_9_10_11 | 30.3206 | -356.72  | 0.63983   | 0 | 0            | 0 | 0.11836731   |
| cov1_4_5_6_8_10  | 30.3433 | -356.732 | 0.6473274 | 0 | -0.019791949 | 0 | 0            |
| cov4_5_6_8_10_11 | 30.3485 | -356.734 | 0.6476226 | 0 | 0            | 0 | 0            |
| cov1_4_6_7_9_10  | 30.3525 | -356.736 | 0.6446747 | 0 | -0.13527902  | 0 | 0            |
| cov1_4_5_8_10_11 | 30.3608 | -356.74  | 0.6472565 | 0 | -0.041769249 | 0 | 0            |
| cov1_4_6_7_8_9   | 30.3616 | -356.741 | 0.6467101 | 0 | -0.13835234  | 0 | 0            |
| cov2_3_6_7_8_10  | 30.3652 | -356.743 | 0.637827  | 0 | 0            | 0 | 0.15409255   |

|                  |         |          |           |   |              |   |              |
|------------------|---------|----------|-----------|---|--------------|---|--------------|
| cov1_2_4_7_9_10  | 30.3673 | -356.744 | 0.6438638 | 0 | -0.17264918  | 0 | 0.018313472  |
| cov1_2_4_7_8_9   | 30.3743 | -356.747 | 0.646033  | 0 | -0.17191479  | 0 | 0.016086988  |
| cov1_4_7_9_10_11 | 30.3777 | -356.749 | 0.6445447 | 0 | -0.163345    | 0 | 0            |
| cov1_4_7_8_9_11  | 30.3823 | -356.751 | 0.6465528 | 0 | -0.16429104  | 0 | 0            |
| cov1_2_3_6_10_11 | 30.3995 | -356.76  | 0.6362423 | 0 | -0.080544379 | 0 | 0.17878452   |
| cov1_2_3_6_8_10  | 30.3998 | -356.76  | 0.6365987 | 0 | -0.078409701 | 0 | 0.17898252   |
| cov1_2_3_6_7_10  | 30.4001 | -356.76  | 0.6364899 | 0 | -0.078497542 | 0 | 0.17887271   |
| cov1_2_3_7_10_11 | 30.406  | -356.763 | 0.6363431 | 0 | -0.095182013 | 0 | 0.17756496   |
| cov1_2_3_8_10_11 | 30.406  | -356.763 | 0.6365285 | 0 | -0.094394258 | 0 | 0.17772545   |
| cov1_5_6_10_11   | 30.4083 | -360.161 | 0.6703055 | 0 | -0.045810103 | 0 | 0            |
| cov1_4_6_8_9_10  | 30.4503 | -356.785 | 0.6450112 | 0 | -0.13334268  | 0 | 0            |
| cov1_2_4_8_9_10  | 30.4703 | -356.795 | 0.6442204 | 0 | -0.17276791  | 0 | 0.01759302   |
| cov1_2_4_6_7_9   | 30.4718 | -356.796 | 0.6460818 | 0 | -0.1418701   | 0 | 0.017326168  |
| cov1_4_8_9_10_11 | 30.4795 | -356.8   | 0.6449982 | 0 | -0.162611    | 0 | 0            |
| cov1_4_6_7_9_11  | 30.4808 | -356.8   | 0.6464143 | 0 | -0.13614532  | 0 | 0            |
| cov1_2_4_7_9_11  | 30.5001 | -356.81  | 0.6459576 | 0 | -0.17133532  | 0 | 0.016053646  |
| cov2_3_6_8_10_11 | 30.5047 | -356.812 | 0.6384018 | 0 | 0            | 0 | 0.15746443   |
| cov2_3_6_7_10_11 | 30.5059 | -356.813 | 0.6382544 | 0 | 0            | 0 | 0.15720797   |
| cov2_3_7_8_10_11 | 30.5294 | -356.825 | 0.6422819 | 0 | 0            | 0 | 0.12220028   |
| cov2_3_4_5_7_11  | 30.5366 | -356.828 | 0.631213  | 0 | 0            | 0 | 0.13570179   |
| cov2_3_4_5_8_11  | 30.5488 | -356.834 | 0.6311685 | 0 | 0            | 0 | 0.13826823   |
| cov1_2_4_6_8_9   | 30.5701 | -356.845 | 0.6464364 | 0 | -0.13968013  | 0 | 0.016739458  |
| cov2_3_4_5_7_8   | 30.5719 | -356.846 | 0.6352534 | 0 | 0            | 0 | 0.15500665   |
| cov1_4_6_8_9_11  | 30.5788 | -356.849 | 0.6468426 | 0 | -0.13345195  | 0 | 0            |
| cov1_2_4_8_9_11  | 30.6027 | -356.861 | 0.6464446 | 0 | -0.17033823  | 0 | 0.015456678  |
| cov4_6_7_8_9_10  | 30.6059 | -356.863 | 0.6472812 | 0 | 0            | 0 | 0            |
| cov1_2_5_6_11    | 30.6752 | -360.295 | 0.6627931 | 0 | -0.039754999 | 0 | 0.19041327   |
| cov4_6_7_9_10_11 | 30.676  | -356.898 | 0.6485451 | 0 | 0            | 0 | 0            |
| cov1_4_6_7_8_10  | 30.699  | -356.909 | 0.6482874 | 0 | -0.13216756  | 0 | 0            |
| cov2_4_6_7_9_10  | 30.6992 | -356.91  | 0.6474761 | 0 | 0            | 0 | -0.013917163 |
| cov4_6_7_8_9_11  | 30.7011 | -356.911 | 0.6505886 | 0 | 0            | 0 | 0            |
| cov1_2_4_7_8_10  | 30.7044 | -356.912 | 0.647494  | 0 | -0.16575519  | 0 | 0.020007322  |
| cov1_4_7_8_10_11 | 30.7168 | -356.918 | 0.6480978 | 0 | -0.15673176  | 0 | 0            |
| cov2_4_6_7_8_9   | 30.7212 | -356.921 | 0.6495593 | 0 | 0            | 0 | -0.016562068 |
| cov4_6_8_9_10_11 | 30.7617 | -356.941 | 0.6488621 | 0 | 0            | 0 | 0            |
| cov2_4_6_8_9_10  | 30.787  | -356.953 | 0.6477426 | 0 | 0            | 0 | -0.013955323 |
| cov2_4_6_7_9_11  | 30.7996 | -356.96  | 0.6505627 | 0 | 0            | 0 | -0.011908814 |
| cov1_2_4_6_7_10  | 30.8041 | -356.962 | 0.6475234 | 0 | -0.1373774   | 0 | 0.021207994  |
| cov1_4_6_7_10_11 | 30.8176 | -356.969 | 0.6479474 | 0 | -0.13030238  | 0 | 0            |
| cov1_2_4_7_10_11 | 30.8293 | -356.975 | 0.6473788 | 0 | -0.16546004  | 0 | 0.019992678  |
| cov2_4_6_8_9_11  | 30.8855 | -357.003 | 0.6508793 | 0 | 0            | 0 | -0.01180984  |
| cov1_2_4_6_8_10  | 30.9031 | -357.012 | 0.647877  | 0 | -0.13516518  | 0 | 0.020617954  |
| cov1_4_6_8_10_11 | 30.9161 | -357.018 | 0.6483809 | 0 | -0.12758931  | 0 | 0            |
| cov1_2_4_8_10_11 | 30.9324 | -357.026 | 0.6478485 | 0 | -0.16446242  | 0 | 0.019404872  |
| cov4_6_7_8_10_11 | 31.0112 | -357.066 | 0.6518249 | 0 | 0            | 0 | 0            |
| cov2_4_6_7_8_10  | 31.0323 | -357.076 | 0.6507951 | 0 | 0            | 0 | -0.01180427  |
| cov3_4_5_7_8_11  | 31.0499 | -357.085 | 0.6355997 | 0 | 0            | 0 | 0            |

|                  |         |          |           |   |             |   |              |
|------------------|---------|----------|-----------|---|-------------|---|--------------|
| cov2_4_6_7_10_11 | 31.113  | -357.116 | 0.6517345 | 0 | 0           | 0 | -0.007284774 |
| cov1_3_5_7_8_9   | 31.1609 | -357.14  | 0.6372765 | 0 | 0.13653103  | 0 | 0            |
| cov1_3_5_8_9_10  | 31.1965 | -357.158 | 0.6357435 | 0 | 0.14316916  | 0 | 0            |
| cov1_3_7_8_9_10  | 31.1984 | -357.159 | 0.6378061 | 0 | 0.04646123  | 0 | 0            |
| cov2_4_6_8_10_11 | 31.1998 | -357.16  | 0.652052  | 0 | 0           | 0 | -0.007181398 |
| cov4_7_8_9_10_11 | 31.2131 | -357.167 | 0.6544787 | 0 | 0           | 0 | 0            |
| cov1_3_5_7_9_10  | 31.214  | -357.167 | 0.6357786 | 0 | 0.13724116  | 0 | 0            |
| cov3_6_7_8_9_10  | 31.2266 | -357.173 | 0.6375275 | 0 | 0           | 0 | 0            |
| cov1_3_5_9_10_11 | 31.2328 | -357.176 | 0.6350515 | 0 | 0.10849894  | 0 | 0            |
| cov1_3_5_6_9_10  | 31.2379 | -357.179 | 0.6359734 | 0 | 0.10541212  | 0 | 0            |
| cov2_4_7_9_10_11 | 31.2381 | -357.179 | 0.6545014 | 0 | 0           | 0 | -0.051257776 |
| cov2_4_7_8_9_11  | 31.2468 | -357.183 | 0.6565319 | 0 | 0           | 0 | -0.053490657 |
| cov3_7_8_9_10_11 | 31.2891 | -357.205 | 0.6334949 | 0 | 0           | 0 | 0            |
| cov1_3_7_8_9_11  | 31.2937 | -357.207 | 0.6384987 | 0 | 0.041263039 | 0 | 0            |
| cov1_3_6_7_8_9   | 31.2966 | -357.208 | 0.6392478 | 0 | 0.039224118 | 0 | 0            |
| cov1_3_5_8_9_11  | 31.2973 | -357.209 | 0.6364856 | 0 | 0.13607225  | 0 | 0            |
| cov1_3_5_6_8_9   | 31.2983 | -357.209 | 0.6372908 | 0 | 0.13163409  | 0 | 0            |
| cov3_5_6_7_8_9   | 31.314  | -357.217 | 0.6383442 | 0 | 0           | 0 | 0            |
| cov1_3_5_7_9_11  | 31.3154 | -357.218 | 0.636483  | 0 | 0.12961471  | 0 | 0            |
| cov3_6_7_8_9_11  | 31.3158 | -357.218 | 0.6378455 | 0 | 0           | 0 | 0            |
| cov1_3_5_6_7_9   | 31.318  | -357.219 | 0.6373278 | 0 | 0.12659738  | 0 | 0            |
| cov2_4_8_9_10_11 | 31.3309 | -357.225 | 0.654892  | 0 | 0           | 0 | -0.051447227 |
| cov1_3_5_6_9_11  | 31.3422 | -357.231 | 0.6365543 | 0 | 0.098678804 | 0 | 0            |
| cov3_5_7_8_9_10  | 31.3471 | -357.234 | 0.6369477 | 0 | 0           | 0 | 0            |
| cov1_3_7_9_10_11 | 31.3549 | -357.237 | 0.637171  | 0 | 0.040526965 | 0 | 0            |
| cov1_3_6_9_10_11 | 31.3577 | -357.239 | 0.6374284 | 0 | 0.038666563 | 0 | 0            |
| cov1_3_8_9_10_11 | 31.3578 | -357.239 | 0.6373333 | 0 | 0.041444823 | 0 | 0            |
| cov3_5_6_9_10_11 | 31.358  | -357.239 | 0.6352656 | 0 | 0           | 0 | 0            |
| cov1_3_6_7_9_10  | 31.3582 | -357.239 | 0.6377886 | 0 | 0.042093485 | 0 | 0            |
| cov1_3_6_8_9_10  | 31.3603 | -357.24  | 0.6378877 | 0 | 0.042341176 | 0 | 0            |
| cov3_5_6_8_9_10  | 31.3808 | -357.25  | 0.6368579 | 0 | 0           | 0 | 0            |
| cov3_5_6_7_9_10  | 31.3832 | -357.252 | 0.6368314 | 0 | 0           | 0 | 0            |
| cov3_6_7_9_10_11 | 31.3833 | -357.252 | 0.6363502 | 0 | 0           | 0 | 0            |
| cov3_5_7_8_9_11  | 31.3845 | -357.252 | 0.6358607 | 0 | 0           | 0 | 0            |
| cov3_6_8_9_10_11 | 31.3874 | -357.254 | 0.6365063 | 0 | 0           | 0 | 0            |
| cov2_4_5_9_10_11 | 31.4031 | -357.262 | 0.6576555 | 0 | 0           | 0 | -0.058530596 |
| cov2_4_7_8_9_10  | 31.4287 | -357.274 | 0.6521569 | 0 | 0           | 0 | -0.082418548 |
| cov3_5_7_9_10_11 | 31.4432 | -357.282 | 0.6345107 | 0 | 0           | 0 | 0            |
| cov1_2_4_5_9_10  | 31.4483 | -357.284 | 0.6569975 | 0 | 0.039915934 | 0 | -0.091507378 |
| cov3_5_8_9_10_11 | 31.4516 | -357.286 | 0.6345018 | 0 | 0           | 0 | 0            |
| cov1_3_5_7_8_10  | 31.4551 | -357.288 | 0.6385468 | 0 | 0.15110334  | 0 | 0            |
| cov1_3_6_7_9_11  | 31.4551 | -357.288 | 0.6384899 | 0 | 0.039336027 | 0 | 0            |
| cov1_3_6_8_9_11  | 31.4562 | -357.288 | 0.6386411 | 0 | 0.040050145 | 0 | 0            |
| cov3_5_6_8_9_11  | 31.4614 | -357.291 | 0.6366704 | 0 | 0           | 0 | 0            |
| cov3_5_6_7_9_11  | 31.4646 | -357.292 | 0.6366373 | 0 | 0           | 0 | 0            |
| cov2_4_5_6_9_10  | 31.4717 | -357.296 | 0.6563449 | 0 | 0           | 0 | -0.075598367 |
| cov1_2_3_5_7_8   | 31.4921 | -357.306 | 0.6321199 | 0 | 0.16764049  | 0 | 0.21485075   |

|                  |         |          |           |   |              |   |              |
|------------------|---------|----------|-----------|---|--------------|---|--------------|
| cov1_2_4_5_7_8   | 31.5015 | -357.311 | 0.6467326 | 0 | 0.12366492   | 0 | -0.025124161 |
| cov1_4_5_6_7_8   | 31.5147 | -357.317 | 0.6457971 | 0 | 0.090774228  | 0 | 0            |
| cov1_2_4_5_9_11  | 31.5159 | -357.318 | 0.6613286 | 0 | 0.059301155  | 0 | -0.085500947 |
| cov1_4_5_7_8_11  | 31.5175 | -357.319 | 0.6460613 | 0 | 0.10414452   | 0 | 0            |
| cov2_4_7_8_10_11 | 31.5204 | -357.32  | 0.6573655 | 0 | 0            | 0 | -0.047380531 |
| cov4_5_6_9_10_11 | 31.5318 | -357.326 | 0.6569605 | 0 | 0            | 0 | 0            |
| cov1_4_5_9_10_11 | 31.5334 | -357.327 | 0.6569884 | 0 | -3.98E-05    | 0 | 0            |
| cov2_4_5_6_9_11  | 31.5588 | -357.339 | 0.6601623 | 0 | 0            | 0 | -0.066933834 |
| cov1_3_5_6_8_10  | 31.5892 | -357.355 | 0.6385756 | 0 | 0.14411064   | 0 | 0            |
| cov1_3_5_8_10_11 | 31.5892 | -357.355 | 0.6377062 | 0 | 0.1500755    | 0 | 0            |
| cov1_2_3_5_6_8   | 31.5958 | -357.358 | 0.6323371 | 0 | 0.14795598   | 0 | 0.21326258   |
| cov1_3_5_7_10_11 | 31.6079 | -357.364 | 0.637705  | 0 | 0.14367732   | 0 | 0            |
| cov1_2_4_5_6_9   | 31.6083 | -357.364 | 0.6594612 | 0 | 0.047472959  | 0 | -0.091578985 |
| cov1_3_5_6_7_10  | 31.6098 | -357.365 | 0.6386148 | 0 | 0.1391211    | 0 | 0            |
| cov1_3_7_8_10_11 | 31.6165 | -357.368 | 0.6400487 | 0 | 0.046705682  | 0 | 0            |
| cov1_2_3_5_8_11  | 31.6176 | -357.369 | 0.6320307 | 0 | 0.17276826   | 0 | 0.2154049    |
| cov1_3_6_7_8_10  | 31.6194 | -357.37  | 0.6408602 | 0 | 0.043591036  | 0 | 0            |
| cov1_2_4_5_6_7   | 31.6209 | -357.37  | 0.6466021 | 0 | 0.11463699   | 0 | -0.025773959 |
| cov1_2_4_5_7_11  | 31.6229 | -357.371 | 0.6467391 | 0 | 0.12428094   | 0 | -0.024845805 |
| cov1_2_3_5_6_7   | 31.6238 | -357.372 | 0.6323786 | 0 | 0.14375339   | 0 | 0.21274244   |
| cov1_3_5_6_10_11 | 31.6362 | -357.378 | 0.6378161 | 0 | 0.10979874   | 0 | 0            |
| cov1_4_5_6_7_11  | 31.6374 | -357.379 | 0.6459715 | 0 | 0.096250351  | 0 | 0            |
| cov3_5_6_7_8_10  | 31.6414 | -357.381 | 0.6398822 | 0 | 0            | 0 | 0            |
| cov2_4_5_6_7_8   | 31.6423 | -357.381 | 0.6450347 | 0 | 0            | 0 | 0.013655413  |
| cov4_5_6_7_8_11  | 31.6432 | -357.382 | 0.6448061 | 0 | 0            | 0 | 0            |
| cov1_2_3_5_7_11  | 31.6436 | -357.382 | 0.6320423 | 0 | 0.16719119   | 0 | 0.21478236   |
| cov3_6_7_8_10_11 | 31.644  | -357.382 | 0.6393584 | 0 | 0            | 0 | 0            |
| cov1_4_5_6_9_10  | 31.6639 | -357.392 | 0.6545248 | 0 | -0.017910119 | 0 | 0            |
| cov2_3_5_6_7_8   | 31.6767 | -357.398 | 0.6335674 | 0 | 0            | 0 | 0.23395013   |
| cov1_2_3_5_6_11  | 31.7039 | -357.412 | 0.6324385 | 0 | 0.10934254   | 0 | 0.20891024   |
| cov1_2_4_5_6_8   | 31.705  | -357.413 | 0.6469198 | 0 | 0.11813583   | 0 | -0.027095063 |
| cov1_2_4_5_8_11  | 31.7058 | -357.413 | 0.6471411 | 0 | 0.12679526   | 0 | -0.02619042  |
| cov1_4_5_6_9_11  | 31.7059 | -357.413 | 0.6594242 | 0 | 0.004374324  | 0 | 0            |
| cov1_4_5_6_8_11  | 31.7227 | -357.421 | 0.64631   | 0 | 0.09945089   | 0 | 0            |
| cov3_5_7_8_10_11 | 31.7317 | -357.426 | 0.6372254 | 0 | 0            | 0 | 0            |
| cov2_4_5_7_8_11  | 31.7554 | -357.438 | 0.6427398 | 0 | 0            | 0 | 0.040960113  |
| cov2_4_5_6_7_11  | 31.7702 | -357.445 | 0.644334  | 0 | 0            | 0 | 0.013049828  |
| cov1_3_6_7_10_11 | 31.7767 | -357.448 | 0.6400669 | 0 | 0.043346562  | 0 | 0            |
| cov1_3_6_8_10_11 | 31.779  | -357.449 | 0.6402132 | 0 | 0.044094304  | 0 | 0            |
| cov3_5_6_8_10_11 | 31.7859 | -357.453 | 0.6380761 | 0 | 0            | 0 | 0            |
| cov3_5_6_7_10_11 | 31.7882 | -357.454 | 0.638038  | 0 | 0            | 0 | 0            |
| cov1_2_4_5_10_11 | 31.8025 | -357.461 | 0.6624047 | 0 | 0.072434313  | 0 | -0.084189623 |
| cov2_3_5_6_8_11  | 31.8303 | -357.475 | 0.6326206 | 0 | 0            | 0 | 0.23534344   |
| cov2_3_5_6_7_11  | 31.8424 | -357.481 | 0.632588  | 0 | 0            | 0 | 0.23382164   |
| cov2_4_5_6_10_11 | 31.8625 | -357.491 | 0.6611118 | 0 | 0            | 0 | -0.062645504 |
| cov2_4_5_6_8_11  | 31.8652 | -357.493 | 0.6446658 | 0 | 0            | 0 | 0.013232868  |
| cov2_3_5_7_8_11  | 31.8949 | -357.507 | 0.6310904 | 0 | 0            | 0 | 0.25471128   |

|                  |         |          |           |   |              |   |              |
|------------------|---------|----------|-----------|---|--------------|---|--------------|
| cov1_2_4_5_6_10  | 31.895  | -357.507 | 0.6605558 | 0 | 0.05849377   | 0 | -0.090407952 |
| cov1_4_5_6_10_11 | 31.9881 | -357.554 | 0.6605168 | 0 | 0.016393737  | 0 | 0            |
| cov1_2_5_7_9_10  | 32.4157 | -357.768 | 0.6413362 | 0 | -0.2135534   | 0 | 0.16144827   |
| cov1_2_5_7_8_9   | 32.464  | -357.792 | 0.6437056 | 0 | -0.2171301   | 0 | 0.16113088   |
| cov1_4_6_9_10_11 | 32.522  | -357.821 | 0.660855  | 0 | -0.13057274  | 0 | 0            |
| cov1_2_4_9_10_11 | 32.5284 | -357.824 | 0.6607242 | 0 | -0.14479844  | 0 | 0.001275279  |
| cov1_2_5_8_9_10  | 32.5443 | -357.832 | 0.6417105 | 0 | -0.21307375  | 0 | 0.16145755   |
| cov1_2_5_6_7_9   | 32.5707 | -357.845 | 0.6436497 | 0 | -0.19775232  | 0 | 0.16247656   |
| cov1_2_5_7_9_11  | 32.5828 | -357.851 | 0.6440425 | 0 | -0.2131761   | 0 | 0.16122656   |
| cov1_2_3_4_7_8   | 32.6459 | -357.883 | 0.6432229 | 0 | -0.075909085 | 0 | 0.15088155   |
| cov1_2_4_6_9_11  | 32.6472 | -357.884 | 0.66264   | 0 | -0.13033548  | 0 | -0.000550581 |
| cov1_2_4_6_9_10  | 32.6827 | -357.901 | 0.6580209 | 0 | -0.15960518  | 0 | -0.00412856  |
| cov1_2_7_8_9_10  | 32.6928 | -357.906 | 0.6404014 | 0 | -0.10654827  | 0 | 0.17111321   |
| cov1_2_5_6_8_9   | 32.6958 | -357.908 | 0.6440225 | 0 | -0.19473335  | 0 | 0.16268945   |
| cov1_2_5_8_9_11  | 32.7105 | -357.915 | 0.6445498 | 0 | -0.21146863  | 0 | 0.16133357   |
| cov1_2_5_7_8_10  | 32.7588 | -357.939 | 0.6449467 | 0 | -0.20457912  | 0 | 0.16323281   |
| cov1_2_3_4_6_7   | 32.773  | -357.946 | 0.6432208 | 0 | -0.086562402 | 0 | 0.14921095   |
| cov1_2_3_4_7_11  | 32.7754 | -357.948 | 0.6434855 | 0 | -0.073647937 | 0 | 0.15002241   |
| cov2_3_4_6_7_8   | 32.7821 | -357.951 | 0.6443865 | 0 | 0            | 0 | 0.12972491   |
| cov2_4_6_9_10_11 | 32.8022 | -357.961 | 0.6650649 | 0 | 0            | 0 | -0.024858709 |
| cov2_3_4_7_8_11  | 32.8063 | -357.963 | 0.6473244 | 0 | 0            | 0 | 0.12003202   |
| cov1_2_7_9_10_11 | 32.8108 | -357.965 | 0.6408506 | 0 | -0.10107609  | 0 | 0.17123548   |
| cov1_2_6_7_9_10  | 32.8119 | -357.966 | 0.6402986 | 0 | -0.097629823 | 0 | 0.17154814   |
| cov1_2_3_6_7_8   | 32.8206 | -357.97  | 0.6410227 | 0 | -0.075662371 | 0 | 0.19568204   |
| cov1_2_3_4_6_8   | 32.8249 | -357.972 | 0.6433188 | 0 | -0.084481638 | 0 | 0.15119638   |
| cov1_2_3_4_8_11  | 32.8262 | -357.973 | 0.6436692 | 0 | -0.071682157 | 0 | 0.15198145   |
| cov1_2_3_7_8_11  | 32.8298 | -357.975 | 0.6412066 | 0 | -0.054537047 | 0 | 0.19745079   |
| cov1_2_5_6_7_10  | 32.8676 | -357.994 | 0.6448897 | 0 | -0.18731865  | 0 | 0.16441315   |
| cov2_6_7_8_9_10  | 32.8738 | -357.997 | 0.6427331 | 0 | 0            | 0 | 0.14200105   |
| cov1_2_5_7_10_11 | 32.8772 | -357.999 | 0.6452477 | 0 | -0.20089274  | 0 | 0.16331582   |
| cov2_5_6_7_9_10  | 32.8817 | -358.001 | 0.6439629 | 0 | 0            | 0 | 0.12778956   |
| cov2_3_4_6_7_11  | 32.8853 | -358.003 | 0.645522  | 0 | 0            | 0 | 0.13261      |
| cov2_3_6_7_8_11  | 32.9054 | -358.013 | 0.6432869 | 0 | 0            | 0 | 0.17639961   |
| cov1_2_7_8_9_11  | 32.9057 | -358.013 | 0.64347   | 0 | -0.099526528 | 0 | 0.17133128   |
| cov1_2_6_7_8_9   | 32.9071 | -358.014 | 0.6429874 | 0 | -0.098093633 | 0 | 0.17143605   |
| cov2_3_4_6_8_11  | 32.9299 | -358.025 | 0.6456254 | 0 | 0            | 0 | 0.13495431   |
| cov1_2_8_9_10_11 | 32.9356 | -358.028 | 0.641351  | 0 | -0.099654146 | 0 | 0.17130849   |
| cov1_2_6_8_9_10  | 32.9367 | -358.028 | 0.6406736 | 0 | -0.094642061 | 0 | 0.17175296   |
| cov2_6_7_9_10_11 | 32.9527 | -358.036 | 0.6437833 | 0 | 0            | 0 | 0.14720956   |
| cov1_2_3_6_7_11  | 32.9598 | -358.04  | 0.6413229 | 0 | -0.068582006 | 0 | 0.19600851   |
| cov2_5_6_7_8_9   | 32.9612 | -358.041 | 0.6465074 | 0 | 0            | 0 | 0.12624152   |
| cov2_5_6_8_9_10  | 32.9924 | -358.056 | 0.6442565 | 0 | 0            | 0 | 0.12848258   |
| cov1_2_5_6_8_10  | 32.9929 | -358.056 | 0.6452556 | 0 | -0.18428196  | 0 | 0.16462201   |
| cov1_2_3_6_8_11  | 32.9981 | -358.059 | 0.6415801 | 0 | -0.066851276 | 0 | 0.19635641   |
| cov1_2_5_8_10_11 | 33.0048 | -358.062 | 0.6457478 | 0 | -0.19915909  | 0 | 0.16342148   |
| cov2_7_8_9_10_11 | 33.0086 | -358.064 | 0.6477138 | 0 | 0            | 0 | 0.11317369   |
| cov1_2_4_6_10_11 | 33.0115 | -358.066 | 0.6641489 | 0 | -0.12567183  | 0 | 0.003119379  |

|                  |         |          |           |   |              |   |              |
|------------------|---------|----------|-----------|---|--------------|---|--------------|
| cov2_5_6_7_9_11  | 33.0208 | -358.07  | 0.6480904 | 0 | 0            | 0 | 0.13052321   |
| cov1_2_6_7_9_11  | 33.0259 | -358.073 | 0.6432856 | 0 | -0.091570761 | 0 | 0.17171794   |
| cov2_6_7_8_9_11  | 33.0522 | -358.086 | 0.6463829 | 0 | 0            | 0 | 0.14679538   |
| cov2_6_8_9_10_11 | 33.0652 | -358.093 | 0.6441186 | 0 | 0            | 0 | 0.14837202   |
| cov2_5_7_9_10_11 | 33.1268 | -358.123 | 0.6481817 | 0 | 0            | 0 | 0.10768775   |
| cov2_5_6_8_9_11  | 33.1285 | -358.124 | 0.6484124 | 0 | 0            | 0 | 0.1313404    |
| cov1_2_7_8_10_11 | 33.1385 | -358.129 | 0.6444071 | 0 | -0.095351943 | 0 | 0.17280647   |
| cov1_2_6_7_8_10  | 33.1403 | -358.13  | 0.6439682 | 0 | -0.095335606 | 0 | 0.17276276   |
| cov1_2_3_4_6_11  | 33.1413 | -358.131 | 0.6460595 | 0 | -0.066838444 | 0 | 0.17550695   |
| cov1_2_6_8_9_11  | 33.1499 | -358.135 | 0.6437723 | 0 | -0.087809002 | 0 | 0.17198188   |
| cov2_5_7_8_9_10  | 33.1693 | -358.145 | 0.6454976 | 0 | 0            | 0 | 0.094376643  |
| cov1_2_4_5_6_11  | 33.1836 | -358.152 | 0.6599106 | 0 | 0.18098581   | 0 | -0.065762012 |
| cov1_2_4_7_8_11  | 33.2062 | -358.163 | 0.6472884 | 0 | -0.097903446 | 0 | 0.10071168   |
| cov1_2_4_6_7_8   | 33.2069 | -358.163 | 0.6467939 | 0 | -0.11065836  | 0 | 0.099629256  |
| cov2_5_6_7_8_10  | 33.208  | -358.164 | 0.6473342 | 0 | 0            | 0 | 0.13000216   |
| cov2_5_7_8_9_11  | 33.2089 | -358.164 | 0.6508742 | 0 | 0            | 0 | 0.10601277   |
| cov2_5_8_9_10_11 | 33.2423 | -358.181 | 0.6486078 | 0 | 0            | 0 | 0.10820495   |
| cov1_2_6_7_10_11 | 33.2587 | -358.189 | 0.6442298 | 0 | -0.088875331 | 0 | 0.1730736    |
| cov2_5_6_7_10_11 | 33.2719 | -358.196 | 0.6488045 | 0 | 0            | 0 | 0.13415918   |
| cov2_6_7_8_10_11 | 33.2773 | -358.199 | 0.6471974 | 0 | 0            | 0 | 0.14882108   |
| cov1_3_4_6_7_8   | 33.2961 | -358.208 | 0.649272  | 0 | -0.034344773 | 0 | 0            |
| cov1_3_4_7_8_11  | 33.3121 | -358.216 | 0.6492721 | 0 | -0.011144253 | 0 | 0            |
| cov3_4_6_7_8_11  | 33.3153 | -358.218 | 0.6499488 | 0 | 0            | 0 | 0            |
| cov1_2_4_6_7_11  | 33.3173 | -358.219 | 0.6471904 | 0 | -0.10354341  | 0 | 0.10007178   |
| cov2_5_6_8_10_11 | 33.3806 | -358.25  | 0.649163  | 0 | 0            | 0 | 0.13497149   |
| cov1_2_6_8_10_11 | 33.3828 | -358.251 | 0.6447067 | 0 | -0.085107462 | 0 | 0.17333667   |
| cov2_4_6_7_8_11  | 33.3889 | -358.254 | 0.6503653 | 0 | 0            | 0 | 0.075801723  |
| cov1_3_5_6_7_8   | 33.3976 | -358.259 | 0.6398752 | 0 | 0.26540897   | 0 | 0            |
| cov2_5_7_8_10_11 | 33.4203 | -358.27  | 0.6512822 | 0 | 0            | 0 | 0.11136819   |
| cov1_3_4_6_7_11  | 33.4228 | -358.271 | 0.6492972 | 0 | -0.030390206 | 0 | 0            |
| cov1_2_4_6_8_11  | 33.4252 | -358.273 | 0.6476014 | 0 | -0.10034707  | 0 | 0.099715471  |
| cov1_5_7_8_9_10  | 33.4272 | -358.274 | 0.6467687 | 0 | -0.0980255   | 0 | 0            |
| cov1_3_5_7_8_11  | 33.4848 | -358.302 | 0.6387406 | 0 | 0.31445595   | 0 | 0            |
| cov1_3_4_6_8_11  | 33.4921 | -358.306 | 0.649542  | 0 | -0.02647771  | 0 | 0            |
| cov1_4_6_7_8_11  | 33.5404 | -358.33  | 0.650855  | 0 | -0.059647802 | 0 | 0            |
| cov1_3_5_6_8_11  | 33.5435 | -358.332 | 0.6395549 | 0 | 0.27422227   | 0 | 0            |
| cov1_5_6_7_9_10  | 33.546  | -358.333 | 0.6466563 | 0 | -0.094817202 | 0 | 0            |
| cov1_5_7_9_10_11 | 33.5464 | -358.333 | 0.6466766 | 0 | -0.098031943 | 0 | 0            |
| cov1_3_5_6_7_11  | 33.5615 | -358.341 | 0.6395447 | 0 | 0.26863688   | 0 | 0            |
| cov5_6_7_8_9_10  | 33.5641 | -358.342 | 0.6476791 | 0 | 0            | 0 | 0            |
| cov1_5_6_7_8_9   | 33.5904 | -358.355 | 0.6488359 | 0 | -0.10068546  | 0 | 0            |
| cov1_5_7_8_9_11  | 33.5904 | -358.355 | 0.6488057 | 0 | -0.1024254   | 0 | 0            |
| cov5_7_8_9_10_11 | 33.6189 | -358.369 | 0.6497561 | 0 | 0            | 0 | 0            |
| cov5_6_7_9_10_11 | 33.664  | -358.392 | 0.6483471 | 0 | 0            | 0 | 0            |
| cov1_5_6_8_9_10  | 33.6737 | -358.397 | 0.6470385 | 0 | -0.091613046 | 0 | 0            |
| cov1_5_8_9_10_11 | 33.6747 | -358.397 | 0.6471828 | 0 | -0.096232102 | 0 | 0            |
| cov1_5_6_7_9_11  | 33.7093 | -358.415 | 0.6486329 | 0 | -0.098379414 | 0 | 0            |



|                    |         |          |           |   |              |              |
|--------------------|---------|----------|-----------|---|--------------|--------------|
| cov5_6_7_8_9_11    | 33.7252 | -358.423 | 0.6506816 | 0 | 0            | 0            |
| cov5_6_8_9_10_11   | 33.7819 | -358.451 | 0.6487358 | 0 | 0            | 0            |
| cov1_5_6_8_9_11    | 33.8373 | -358.479 | 0.6491224 | 0 | -0.094310761 | 0            |
| cov1_5_7_8_10_11   | 33.916  | -358.518 | 0.6501258 | 0 | -0.088840367 | 0            |
| cov1_5_6_7_8_10    | 33.9161 | -358.518 | 0.6502054 | 0 | -0.089036529 | 0            |
| cov1_6_7_8_9_10    | 33.9642 | -358.542 | 0.6465129 | 0 | 0.020068027  | 0            |
| cov1_7_8_9_10_11   | 33.9702 | -358.545 | 0.6465846 | 0 | 0.036147289  | 0            |
| cov6_7_8_9_10_11   | 33.9729 | -358.546 | 0.6461501 | 0 | 0            | 0            |
| cov1_3_4_5_7_8_9   | 34.0043 | -355.165 | 0.634393  | 0 | 0.19698415   | 0            |
| cov1_3_4_5_8_9_10  | 34.0091 | -355.167 | 0.632674  | 0 | 0.20309434   | 0            |
| cov5_6_7_8_10_11   | 34.0223 | -358.571 | 0.6516733 | 0 | 0            | 0            |
| cov1_5_6_7_10_11   | 34.0348 | -358.577 | 0.6499665 | 0 | -0.086934647 | 0            |
| cov1_3_4_5_7_9_10  | 34.0536 | -355.189 | 0.6327053 | 0 | 0.19783839   | 0            |
| cov1_6_7_9_10_11   | 34.0875 | -358.604 | 0.6465173 | 0 | 0.024808333  | 0            |
| cov1_2_3_4_5_8_9   | 34.1085 | -355.217 | 0.6347757 | 0 | 0.21367406   | -0.014606555 |
| cov1_3_4_5_8_9_11  | 34.1089 | -355.217 | 0.6336366 | 0 | 0.19643166   | 0            |
| cov1_3_4_5_6_8_9   | 34.113  | -355.219 | 0.6343296 | 0 | 0.20780288   | 0            |
| cov1_3_4_5_7_9_11  | 34.154  | -355.24  | 0.6336374 | 0 | 0.19075707   | 0            |
| cov1_2_3_4_5_7_9   | 34.1544 | -355.24  | 0.6348158 | 0 | 0.20833023   | -0.014477278 |
| cov1_3_4_5_6_7_9   | 34.1581 | -355.242 | 0.6343744 | 0 | 0.20413887   | 0            |
| cov1_5_6_8_10_11   | 34.163  | -358.642 | 0.6504488 | 0 | -0.082852921 | 0            |
| cov1_6_7_8_9_11    | 34.1815 | -358.651 | 0.6490872 | 0 | 0.023405     | 0            |
| cov3_5_6_7_8_11    | 34.2088 | -358.664 | 0.6417259 | 0 | 0            | 0            |
| cov1_6_8_9_10_11   | 34.2147 | -358.667 | 0.6469991 | 0 | 0.028790422  | 0            |
| cov1_3_4_5_7_8_10  | 34.2498 | -355.288 | 0.6355809 | 0 | 0.21140248   | 0            |
| cov1_2_6_7_8_11    | 34.269  | -358.695 | 0.6446017 | 0 | -0.080747868 | 0.18677739   |
| cov1_2_5_6_7_8     | 34.2758 | -358.698 | 0.6437964 | 0 | -0.085801335 | 0.1864067    |
| cov1_2_5_7_8_11    | 34.2761 | -358.698 | 0.6444452 | 0 | -0.065888085 | 0.18807892   |
| cov1_3_4_5_9_10_11 | 34.2788 | -355.302 | 0.631934  | 0 | 0.12112855   | 0            |
| cov1_3_4_5_6_9_10  | 34.2908 | -355.308 | 0.6331929 | 0 | 0.14116679   | 0            |
| cov1_2_3_4_5_9_10  | 34.2913 | -355.308 | 0.6335473 | 0 | 0.13869483   | -0.011518722 |
| cov1_3_4_5_8_10_11 | 34.3524 | -355.339 | 0.6347779 | 0 | 0.2103056    | 0            |
| cov2_5_6_7_8_11    | 34.3525 | -358.736 | 0.6460507 | 0 | 0            | 0.17058229   |
| cov1_2_3_4_5_8_10  | 34.3538 | -355.34  | 0.6359133 | 0 | 0.22688641   | -0.013068206 |
| cov1_3_4_5_6_8_10  | 34.3578 | -355.342 | 0.6355109 | 0 | 0.22013139   | 0            |
| cov1_2_5_6_7_11    | 34.3851 | -358.753 | 0.6444067 | 0 | -0.077309891 | 0.1869113    |
| cov1_3_4_5_6_9_11  | 34.3898 | -355.358 | 0.6335667 | 0 | 0.13178092   | 0            |
| cov1_2_3_4_5_9_11  | 34.3923 | -355.359 | 0.634019  | 0 | 0.12720681   | -0.013408079 |
| cov1_3_4_5_7_10_11 | 34.398  | -355.362 | 0.6347816 | 0 | 0.2046902    | 0            |
| cov1_2_3_4_5_7_10  | 34.4002 | -355.363 | 0.6359531 | 0 | 0.22160016   | -0.012939263 |
| cov1_3_4_5_6_7_10  | 34.4037 | -355.365 | 0.635556  | 0 | 0.21651738   | 0            |
| cov1_2_3_4_5_6_9   | 34.408  | -355.367 | 0.6353544 | 0 | 0.14697939   | -0.011005737 |
| cov3_4_5_6_7_8_9   | 34.4262 | -355.376 | 0.635853  | 0 | 0            | 0            |
| cov1_6_7_8_10_11   | 34.4361 | -358.778 | 0.6500335 | 0 | 0.027404909  | 0            |
| cov3_4_5_6_8_9_10  | 34.4707 | -355.398 | 0.6342137 | 0 | 0            | 0            |
| cov1_3_6_7_8_11    | 34.4823 | -358.801 | 0.6471411 | 0 | 0.064653992  | 0            |
| cov3_4_5_7_8_9_11  | 34.4831 | -355.404 | 0.6331546 | 0 | 0            | 0            |

|                    |         |          |           |   |              |   |              |
|--------------------|---------|----------|-----------|---|--------------|---|--------------|
| cov3_4_5_7_8_9_10  | 34.4882 | -355.407 | 0.6349061 | 0 | 0            | 0 | 0            |
| cov2_3_4_5_7_8_9   | 34.4889 | -355.407 | 0.6344991 | 0 | 0            | 0 | 0.055324561  |
| cov3_4_5_6_7_9_10  | 34.4944 | -355.41  | 0.6341992 | 0 | 0            | 0 | 0            |
| cov3_4_5_6_9_10_11 | 34.496  | -355.411 | 0.6318464 | 0 | 0            | 0 | 0            |
| cov1_2_5_6_8_11    | 34.5083 | -358.814 | 0.64484   | 0 | -0.073557848 | 0 | 0.18716569   |
| cov2_3_4_5_9_10_11 | 34.5098 | -355.418 | 0.6306407 | 0 | 0            | 0 | 0.037284262  |
| cov2_3_4_5_6_9_10  | 34.5194 | -355.422 | 0.6330565 | 0 | 0            | 0 | 0.030633664  |
| cov3_4_5_6_8_9_11  | 34.5249 | -355.425 | 0.633565  | 0 | 0            | 0 | 0            |
| cov2_3_4_5_8_9_10  | 34.5256 | -355.426 | 0.6327913 | 0 | 0            | 0 | 0.057631228  |
| cov2_3_4_5_6_8_9   | 34.5308 | -355.428 | 0.6345501 | 0 | 0            | 0 | 0.039105155  |
| cov3_4_5_8_9_10_11 | 34.5323 | -355.429 | 0.6316387 | 0 | 0            | 0 | 0            |
| cov2_3_4_5_7_9_10  | 34.5423 | -355.434 | 0.6328192 | 0 | 0            | 0 | 0.055706476  |
| cov3_4_5_7_9_10_11 | 34.5435 | -355.434 | 0.6316388 | 0 | 0            | 0 | 0            |
| cov3_4_5_6_7_9_11  | 34.5489 | -355.437 | 0.6335421 | 0 | 0            | 0 | 0            |
| cov2_3_4_5_6_7_9   | 34.5584 | -355.442 | 0.6345731 | 0 | 0            | 0 | 0.03801224   |
| cov2_3_4_5_8_9_11  | 34.5586 | -355.442 | 0.6319779 | 0 | 0            | 0 | 0.047279274  |
| cov2_3_4_5_7_9_11  | 34.5769 | -355.451 | 0.6320277 | 0 | 0            | 0 | 0.045367934  |
| cov2_3_4_5_6_9_11  | 34.5869 | -355.456 | 0.6327666 | 0 | 0            | 0 | 0.024951197  |
| cov1_3_4_5_6_10_11 | 34.6436 | -355.484 | 0.6347516 | 0 | 0.14286125   | 0 | 0            |
| cov1_2_3_4_5_10_11 | 34.6452 | -355.485 | 0.6351529 | 0 | 0.13911955   | 0 | -0.011867115 |
| cov1_2_3_4_5_6_10  | 34.6637 | -355.495 | 0.6365238 | 0 | 0.15738573   | 0 | -0.009542866 |
| cov3_4_5_6_7_8_10  | 34.7279 | -355.527 | 0.6373955 | 0 | 0            | 0 | 0            |
| cov2_3_4_5_7_8_10  | 34.8025 | -355.564 | 0.6359244 | 0 | 0            | 0 | 0.061667061  |
| cov3_4_5_7_8_10_11 | 34.8037 | -355.565 | 0.6345877 | 0 | 0            | 0 | 0            |
| cov3_4_5_6_8_10_11 | 34.8219 | -355.574 | 0.6349724 | 0 | 0            | 0 | 0            |
| cov2_3_4_5_6_8_10  | 34.8235 | -355.574 | 0.6359128 | 0 | 0            | 0 | 0.043470466  |
| cov3_4_5_6_7_10_11 | 34.8453 | -355.585 | 0.6349454 | 0 | 0            | 0 | 0            |
| cov2_3_4_5_6_7_10  | 34.8508 | -355.588 | 0.635941  | 0 | 0            | 0 | 0.042397204  |
| cov2_3_4_5_8_10_11 | 34.8629 | -355.594 | 0.6332205 | 0 | 0            | 0 | 0.052821541  |
| cov2_3_4_5_6_10_11 | 34.8723 | -355.599 | 0.6339976 | 0 | 0            | 0 | 0.029160694  |
| cov2_3_4_5_7_10_11 | 34.88   | -355.603 | 0.6332641 | 0 | 0            | 0 | 0.050905866  |
| cov1_2_5_9_10_11   | 35.481  | -359.301 | 0.6616051 | 0 | -0.15101714  | 0 | 0.16775427   |
| cov1_2_5_6_9_11    | 35.6618 | -359.391 | 0.6638402 | 0 | -0.15763457  | 0 | 0.16691611   |
| cov1_3_4_5_6_7_8   | 35.6914 | -356.008 | 0.6348328 | 0 | 0.32894856   | 0 | 0            |
| cov1_3_4_5_7_8_11  | 35.7128 | -356.019 | 0.6341869 | 0 | 0.35241993   | 0 | 0            |
| cov1_2_3_4_5_7_8   | 35.715  | -356.02  | 0.6344976 | 0 | 0.35200889   | 0 | 0.007352521  |
| cov2_5_6_9_10_11   | 35.7653 | -359.443 | 0.6643798 | 0 | 0            | 0 | 0.14171631   |
| cov1_2_6_9_10_11   | 35.7793 | -359.45  | 0.6603966 | 0 | -0.070320708 | 0 | 0.17447845   |
| cov1_2_5_6_9_10    | 35.7799 | -359.45  | 0.6578675 | 0 | -0.19231004  | 0 | 0.16401188   |
| cov1_5_6_7_8_11    | 35.7907 | -359.455 | 0.6510487 | 0 | 0.045681886  | 0 | 0            |
| cov1_3_4_5_6_8_11  | 35.7973 | -356.061 | 0.6343818 | 0 | 0.33490638   | 0 | 0            |
| cov1_2_3_4_5_6_8   | 35.7981 | -356.062 | 0.634572  | 0 | 0.3339088    | 0 | 0.004881692  |
| cov1_2_3_4_5_8_11  | 35.8148 | -356.07  | 0.6339526 | 0 | 0.35337758   | 0 | 0.006374982  |
| cov1_3_4_5_6_7_11  | 35.8421 | -356.084 | 0.6343837 | 0 | 0.33090875   | 0 | 0            |
| cov1_2_3_4_5_6_7   | 35.8432 | -356.084 | 0.6346155 | 0 | 0.33011062   | 0 | 0.005126193  |
| cov1_2_3_4_5_7_11  | 35.857  | -356.091 | 0.6339714 | 0 | 0.34785335   | 0 | 0.006436923  |
| cov1_2_5_6_10_11   | 35.9715 | -359.546 | 0.6649234 | 0 | -0.14673345  | 0 | 0.16883939   |

|                    |         |          |           |   |              |   |              |
|--------------------|---------|----------|-----------|---|--------------|---|--------------|
| cov1_2_3_4_7_8_9   | 36.0008 | -356.163 | 0.6388434 | 0 | -0.14144996  | 0 | 0.078708962  |
| cov1_2_3_4_7_9_10  | 36.0675 | -356.196 | 0.6373911 | 0 | -0.14281841  | 0 | 0.078571264  |
| cov1_2_3_4_8_9_10  | 36.0881 | -356.207 | 0.6374548 | 0 | -0.14199897  | 0 | 0.080062294  |
| cov1_2_3_4_5_6_11  | 36.0897 | -356.208 | 0.6343407 | 0 | 0.25798202   | 0 | 0.007194648  |
| cov1_3_4_7_8_9_10  | 36.0908 | -356.208 | 0.6400827 | 0 | -0.11303267  | 0 | 0            |
| cov1_2_3_4_6_9_10  | 36.1138 | -356.22  | 0.6377558 | 0 | -0.11344897  | 0 | 0.088130723  |
| cov1_2_3_4_6_7_9   | 36.1325 | -356.229 | 0.6388406 | 0 | -0.11510775  | 0 | 0.078920414  |
| cov1_2_3_4_9_10_11 | 36.1329 | -356.229 | 0.6379908 | 0 | -0.13618764  | 0 | 0.08718661   |
| cov1_2_3_4_6_8_9   | 36.1512 | -356.238 | 0.6388823 | 0 | -0.11408026  | 0 | 0.080367819  |
| cov1_2_3_4_7_9_11  | 36.1542 | -356.24  | 0.6385697 | 0 | -0.14394724  | 0 | 0.077739749  |
| cov1_3_4_6_7_8_9   | 36.1625 | -356.244 | 0.6414869 | 0 | -0.092342766 | 0 | 0            |
| cov1_3_4_7_8_9_11  | 36.1727 | -356.249 | 0.6409905 | 0 | -0.11629402  | 0 | 0            |
| cov1_2_3_4_8_9_11  | 36.1737 | -356.25  | 0.6386947 | 0 | -0.14242961  | 0 | 0.079305202  |
| cov1_2_3_4_6_9_11  | 36.1916 | -356.258 | 0.6390432 | 0 | -0.11212819  | 0 | 0.087035337  |
| cov1_3_4_6_7_9_10  | 36.2234 | -356.274 | 0.6400968 | 0 | -0.089818224 | 0 | 0            |
| cov2_3_4_6_7_8_9   | 36.2316 | -356.278 | 0.6406987 | 0 | 0            | 0 | 0.054424079  |
| cov1_3_4_7_9_10_11 | 36.2394 | -356.282 | 0.6396666 | 0 | -0.11695589  | 0 | 0            |
| cov3_4_6_7_8_9_10  | 36.2433 | -356.284 | 0.6410574 | 0 | 0            | 0 | 0            |
| cov1_3_4_6_8_9_10  | 36.2501 | -356.288 | 0.6401915 | 0 | -0.088051835 | 0 | 0            |
| cov1_3_4_8_9_10_11 | 36.2672 | -356.296 | 0.6398514 | 0 | -0.11484128  | 0 | 0            |
| cov2_3_4_6_7_9_10  | 36.2821 | -356.304 | 0.6393154 | 0 | 0            | 0 | 0.054957909  |
| cov2_3_4_6_8_9_10  | 36.2982 | -356.312 | 0.6393379 | 0 | 0            | 0 | 0.056426751  |
| cov1_3_4_6_7_9_11  | 36.3035 | -356.314 | 0.6408222 | 0 | -0.092779562 | 0 | 0            |
| cov3_4_6_7_8_9_11  | 36.3172 | -356.321 | 0.6429348 | 0 | 0            | 0 | 0            |
| cov2_3_4_6_9_10_11 | 36.3187 | -356.322 | 0.6406542 | 0 | 0            | 0 | 0.065503547  |
| cov1_3_4_6_8_9_11  | 36.3295 | -356.327 | 0.6409737 | 0 | -0.090524399 | 0 | 0            |
| cov1_2_3_4_7_8_10  | 36.338  | -356.332 | 0.640527  | 0 | -0.13537083  | 0 | 0.082251416  |
| cov1_3_4_6_9_10_11 | 36.338  | -356.332 | 0.6408415 | 0 | -0.081273032 | 0 | 0            |
| cov2_3_5_7_8_9_10  | 36.3488 | -356.337 | 0.6303889 | 0 | 0            | 0 | 0.1924366    |
| cov2_3_4_6_7_9_11  | 36.353  | -356.339 | 0.6414416 | 0 | 0            | 0 | 0.0567634    |
| cov2_3_4_6_8_9_11  | 36.3669 | -356.346 | 0.6415006 | 0 | 0            | 0 | 0.058340159  |
| cov3_4_6_7_9_10_11 | 36.3693 | -356.347 | 0.6415926 | 0 | 0            | 0 | 0            |
| cov3_4_6_8_9_10_11 | 36.3899 | -356.358 | 0.6416938 | 0 | 0            | 0 | 0            |
| cov2_4_5_7_8_9_10  | 36.4442 | -356.385 | 0.6453141 | 0 | 0            | 0 | -0.053353968 |
| cov1_2_3_5_7_8_9   | 36.4489 | -356.387 | 0.6319252 | 0 | 0.02188578   | 0 | 0.18803552   |
| cov2_3_5_7_8_9_11  | 36.4521 | -356.389 | 0.6314347 | 0 | 0            | 0 | 0.19106071   |
| cov2_3_5_6_7_8_9   | 36.4542 | -356.39  | 0.632009  | 0 | 0            | 0 | 0.19099983   |
| cov1_2_3_4_6_7_10  | 36.4715 | -356.398 | 0.6405159 | 0 | -0.11057261  | 0 | 0.0823994    |
| cov1_2_3_5_8_9_10  | 36.4763 | -356.401 | 0.6302866 | 0 | 0.027887819  | 0 | 0.18877271   |
| cov2_3_5_8_9_10_11 | 36.4846 | -356.405 | 0.6299087 | 0 | 0            | 0 | 0.19322928   |
| cov2_3_5_6_8_9_10  | 36.4858 | -356.406 | 0.6303839 | 0 | 0            | 0 | 0.19306117   |
| cov1_2_3_4_7_10_11 | 36.4904 | -356.408 | 0.6402064 | 0 | -0.13835009  | 0 | 0.081243433  |
| cov1_2_3_4_6_8_10  | 36.4907 | -356.408 | 0.6405624 | 0 | -0.10951841  | 0 | 0.083846057  |
| cov1_4_5_7_8_9_10  | 36.4944 | -356.41  | 0.6433792 | 0 | -0.053466878 | 0 | 0            |
| cov4_5_6_7_8_9_10  | 36.4998 | -356.413 | 0.6438551 | 0 | 0            | 0 | 0            |
| cov1_2_3_5_7_9_10  | 36.5036 | -356.414 | 0.6303153 | 0 | 0.022570319  | 0 | 0.18816018   |
| cov2_3_5_7_9_10_11 | 36.5083 | -356.417 | 0.6299311 | 0 | 0            | 0 | 0.19155911   |

|                    |         |          |           |   |              |   |              |
|--------------------|---------|----------|-----------|---|--------------|---|--------------|
| cov2_3_5_6_7_9_10  | 36.5102 | -356.418 | 0.6303894 | 0 | 0            | 0 | 0.19194088   |
| cov1_2_3_4_8_10_11 | 36.5104 | -356.418 | 0.640327  | 0 | -0.13682632  | 0 | 0.082802726  |
| cov1_3_4_6_7_8_10  | 36.5177 | -356.422 | 0.6433097 | 0 | -0.086534232 | 0 | 0            |
| cov1_3_4_7_8_10_11 | 36.5253 | -356.425 | 0.6427716 | 0 | -0.10951767  | 0 | 0            |
| cov1_2_3_4_6_10_11 | 36.5334 | -356.429 | 0.6407196 | 0 | -0.10769029  | 0 | 0.090676175  |
| cov3_4_7_8_9_10_11 | 36.5401 | -356.433 | 0.6453184 | 0 | 0            | 0 | 0            |
| cov4_5_7_8_9_10_11 | 36.5474 | -356.436 | 0.6448171 | 0 | 0            | 0 | 0            |
| cov2_3_4_6_7_8_10  | 36.553  | -356.439 | 0.6422291 | 0 | 0            | 0 | 0.058736285  |
| cov2_4_5_6_7_9_10  | 36.5571 | -356.441 | 0.6449118 | 0 | 0            | 0 | -0.043380399 |
| cov1_2_4_5_7_9_10  | 36.5695 | -356.447 | 0.6448167 | 0 | -0.016465233 | 0 | -0.045534715 |
| cov2_3_5_6_9_10_11 | 36.573  | -356.449 | 0.6298691 | 0 | 0            | 0 | 0.18354711   |
| cov2_4_5_7_9_10_11 | 36.5731 | -356.449 | 0.6453191 | 0 | 0            | 0 | -0.052274848 |
| cov1_2_3_5_9_10_11 | 36.5749 | -356.45  | 0.6299422 | 0 | -0.015303253 | 0 | 0.18409971   |
| cov1_2_3_5_6_9_10  | 36.5763 | -356.451 | 0.6304691 | 0 | -0.004149159 | 0 | 0.18489054   |
| cov1_2_3_5_6_8_9   | 36.5814 | -356.453 | 0.6318505 | 0 | 0.031733599  | 0 | 0.18899767   |
| cov1_2_3_5_8_9_11  | 36.5814 | -356.453 | 0.6316133 | 0 | 0.025442588  | 0 | 0.18853535   |
| cov2_3_5_6_8_9_11  | 36.5891 | -356.457 | 0.6314601 | 0 | 0            | 0 | 0.19242303   |
| cov2_4_5_6_7_8_9   | 36.5945 | -356.46  | 0.6474468 | 0 | 0            | 0 | -0.04634114  |
| cov2_3_4_7_8_9_11  | 36.5987 | -356.462 | 0.6461944 | 0 | 0            | 0 | 0.026868383  |
| cov1_2_4_5_7_8_9   | 36.6037 | -356.465 | 0.6472828 | 0 | -0.019577083 | 0 | -0.046583392 |
| cov1_4_5_6_7_9_10  | 36.6068 | -356.466 | 0.6434641 | 0 | -0.031221314 | 0 | 0            |
| cov2_4_5_7_8_9_11  | 36.6092 | -356.467 | 0.6478497 | 0 | 0            | 0 | -0.055007887 |
| cov1_2_3_5_6_7_9   | 36.6098 | -356.468 | 0.6318867 | 0 | 0.027539179  | 0 | 0.18847101   |
| cov1_2_3_5_7_9_11  | 36.6098 | -356.468 | 0.6316037 | 0 | 0.019656002  | 0 | 0.18789047   |
| cov2_3_5_6_7_9_11  | 36.6145 | -356.47  | 0.6314471 | 0 | 0            | 0 | 0.19127235   |
| cov4_5_6_7_9_10_11 | 36.6194 | -356.472 | 0.6439978 | 0 | 0            | 0 | 0            |
| cov1_4_5_7_9_10_11 | 36.6228 | -356.474 | 0.6433918 | 0 | -0.052218276 | 0 | 0            |
| cov1_2_3_7_8_9_10  | 36.6405 | -356.483 | 0.6335395 | 0 | -0.099525027 | 0 | 0.17645679   |
| cov2_4_5_6_8_9_10  | 36.6422 | -356.484 | 0.6452094 | 0 | 0            | 0 | -0.043589928 |
| cov1_4_5_6_7_8_9   | 36.6471 | -356.486 | 0.6458858 | 0 | -0.037687004 | 0 | 0            |
| cov3_4_6_7_8_10_11 | 36.6548 | -356.49  | 0.6445166 | 0 | 0            | 0 | 0            |
| cov1_2_4_5_8_9_10  | 36.6568 | -356.491 | 0.6451746 | 0 | -0.014581712 | 0 | -0.047046962 |
| cov1_3_4_6_7_10_11 | 36.6576 | -356.492 | 0.6425913 | 0 | -0.087379056 | 0 | 0            |
| cov2_4_5_8_9_10_11 | 36.6592 | -356.492 | 0.6456881 | 0 | 0            | 0 | -0.052473034 |
| cov1_4_5_7_8_9_11  | 36.6599 | -356.493 | 0.6457917 | 0 | -0.056935463 | 0 | 0            |
| cov4_5_6_7_8_9_11  | 36.6659 | -356.496 | 0.646516  | 0 | 0            | 0 | 0            |
| cov2_3_4_7_9_10_11 | 36.6699 | -356.498 | 0.6449477 | 0 | 0            | 0 | 0.026557575  |
| cov1_2_3_7_8_9_11  | 36.6742 | -356.5   | 0.6347432 | 0 | -0.10023946  | 0 | 0.17635366   |
| cov2_3_4_6_7_10_11 | 36.6763 | -356.501 | 0.642887  | 0 | 0            | 0 | 0.06090091   |
| cov2_3_4_8_9_10_11 | 36.6785 | -356.502 | 0.644993  | 0 | 0            | 0 | 0.028523677  |
| cov1_3_4_6_8_10_11 | 36.6845 | -356.505 | 0.6427463 | 0 | -0.085091545 | 0 | 0            |
| cov1_2_3_5_6_9_11  | 36.6861 | -356.506 | 0.6314007 | 0 | -0.009358815 | 0 | 0.18444971   |
| cov1_5_6_9_10_11   | 36.6885 | -359.904 | 0.6670533 | 0 | -0.054104392 | 0 | 0            |
| cov2_3_4_6_8_10_11 | 36.691  | -356.508 | 0.6429507 | 0 | 0            | 0 | 0.062488491  |
| cov2_3_4_7_8_9_10  | 36.6932 | -356.509 | 0.642488  | 0 | 0            | 0 | 0.007336069  |
| cov1_4_5_6_8_9_10  | 36.6946 | -356.51  | 0.6437803 | 0 | -0.028580618 | 0 | 0            |
| cov2_3_4_5_6_7_8   | 36.7034 | -356.514 | 0.635557  | 0 | 0            | 0 | 0.094643789  |

|                    |         |          |           |   |              |              |
|--------------------|---------|----------|-----------|---|--------------|--------------|
| cov4_5_6_8_9_10_11 | 36.7046 | -356.515 | 0.6443426 | 0 | 0            | 0            |
| cov1_2_3_5_7_8_10  | 36.7072 | -356.516 | 0.6331028 | 0 | 0.034963783  | 0.19014246   |
| cov1_4_5_8_9_10_11 | 36.7133 | -356.519 | 0.6438097 | 0 | -0.050403429 | 0            |
| cov2_3_5_7_8_10_11 | 36.7179 | -356.522 | 0.6325103 | 0 | 0            | 0.19532316   |
| cov2_3_5_6_7_8_10  | 36.7189 | -356.522 | 0.6332801 | 0 | 0            | 0.19440724   |
| cov2_4_5_6_7_9_11  | 36.7189 | -356.522 | 0.6470994 | 0 | 0            | -0.045642113 |
| cov1_2_4_5_6_7_9   | 36.7195 | -356.522 | 0.6472722 | 0 | -0.000413123 | -0.044766133 |
| cov1_2_4_5_7_9_11  | 36.7334 | -356.529 | 0.6470571 | 0 | -0.020791604 | -0.046539626 |
| cov1_2_3_6_7_8_9   | 36.7335 | -356.529 | 0.6349093 | 0 | -0.086954651 | 0.17729785   |
| cov1_4_5_6_7_9_11  | 36.7709 | -356.548 | 0.645683  | 0 | -0.035112928 | 0            |
| cov2_3_6_7_8_9_10  | 36.7773 | -356.551 | 0.6349743 | 0 | 0            | 0.15113228   |
| cov1_2_3_6_7_9_10  | 36.7952 | -356.56  | 0.6334115 | 0 | -0.084093407 | 0.17754148   |
| cov1_2_3_6_8_9_10  | 36.7956 | -356.561 | 0.6335295 | 0 | -0.083983338 | 0.17765276   |
| cov1_2_3_6_9_10_11 | 36.7956 | -356.561 | 0.6333344 | 0 | -0.085102531 | 0.1775455    |
| cov1_2_3_7_9_10_11 | 36.8023 | -356.564 | 0.6333998 | 0 | -0.10028683  | 0.17626227   |
| cov1_2_3_8_9_10_11 | 36.8028 | -356.564 | 0.6335907 | 0 | -0.099495387 | 0.17642764   |
| cov2_4_5_6_8_9_11  | 36.8043 | -356.565 | 0.6474488 | 0 | 0            | -0.045636118 |
| cov1_2_4_5_6_8_9   | 36.8045 | -356.565 | 0.6476441 | 0 | 0.00315165   | -0.046090836 |
| cov1_2_4_5_8_9_11  | 36.8211 | -356.573 | 0.647521  | 0 | -0.01792144  | -0.047916736 |
| cov2_3_4_5_6_8_11  | 36.8211 | -356.573 | 0.6332767 | 0 | 0            | 0.091737509  |
| cov2_3_4_5_6_7_11  | 36.832  | -356.579 | 0.633263  | 0 | 0            | 0.090117775  |
| cov1_2_3_5_8_10_11 | 36.838  | -356.582 | 0.6327401 | 0 | 0.038029582  | 0.19060344   |
| cov1_2_3_5_6_8_10  | 36.8388 | -356.582 | 0.6330351 | 0 | 0.042899634  | 0.19095404   |
| cov2_3_5_6_8_10_11 | 36.8538 | -356.59  | 0.6326234 | 0 | 0            | 0.19569033   |
| cov1_4_5_6_8_9_11  | 36.8591 | -356.592 | 0.6460986 | 0 | -0.03169816  | 0            |
| cov2_3_6_7_8_9_11  | 36.8615 | -356.593 | 0.6369679 | 0 | 0            | 0.15366139   |
| cov1_2_3_5_7_10_11 | 36.8671 | -356.596 | 0.632733  | 0 | 0.032299263  | 0.18996556   |
| cov1_2_3_5_6_7_10  | 36.868  | -356.597 | 0.6330715 | 0 | 0.038755227  | 0.19043529   |
| cov2_4_5_6_7_8_10  | 36.8767 | -356.601 | 0.648446  | 0 | 0            | -0.041711576 |
| cov2_3_5_6_7_10_11 | 36.879  | -356.602 | 0.6326061 | 0 | 0            | 0.19453177   |
| cov1_2_4_5_7_8_10  | 36.8833 | -356.604 | 0.6484789 | 0 | -0.006717362 | -0.045133268 |
| cov2_4_5_7_8_10_11 | 36.8839 | -356.605 | 0.6486089 | 0 | 0            | -0.048434211 |
| cov1_2_3_6_8_9_11  | 36.8907 | -356.608 | 0.6347459 | 0 | -0.083459994 | 0.17769842   |
| cov3_4_5_6_7_8_11  | 36.8915 | -356.608 | 0.636326  | 0 | 0            | 0            |
| cov1_2_3_6_7_9_11  | 36.8917 | -356.609 | 0.6345679 | 0 | -0.083988995 | 0.17755797   |
| cov2_3_4_7_8_10_11 | 36.8917 | -356.609 | 0.6473609 | 0 | 0            | 0.032158359  |
| cov2_3_6_8_9_10_11 | 36.9133 | -356.619 | 0.6356917 | 0 | 0            | 0.15498656   |
| cov2_3_6_7_9_10_11 | 36.9141 | -356.62  | 0.6355378 | 0 | 0            | 0.15472555   |
| cov1_4_5_6_7_8_10  | 36.926  | -356.626 | 0.6471052 | 0 | -0.025911995 | 0            |
| cov4_5_6_7_8_10_11 | 36.9351 | -356.63  | 0.647461  | 0 | 0            | 0            |
| cov1_4_5_7_8_10_11 | 36.9361 | -356.631 | 0.6469848 | 0 | -0.043224339 | 0            |
| cov1_2_3_5_6_10_11 | 36.9492 | -356.637 | 0.6325671 | 0 | 0.000588031  | 0.18629729   |
| cov2_3_7_8_9_10_11 | 36.9559 | -356.641 | 0.6398395 | 0 | 0            | 0.11804308   |
| cov1_2_4_5_6_7_10  | 37.0011 | -356.663 | 0.648456  | 0 | 0.010360563  | -0.043498748 |
| cov2_4_5_6_7_10_11 | 37.0012 | -356.663 | 0.6480294 | 0 | 0            | -0.041307797 |
| cov1_2_4_5_7_10_11 | 37.0121 | -356.669 | 0.6482251 | 0 | -0.008193499 | -0.045127388 |
| cov1_4_6_7_8_9_10  | 37.0278 | -356.677 | 0.6447747 | 0 | -0.13902623  | 0            |

|                    |         |          |           |   |              |   |              |
|--------------------|---------|----------|-----------|---|--------------|---|--------------|
| cov1_2_3_6_7_8_10  | 37.0361 | -356.681 | 0.6365439 | 0 | -0.083342559 | 0 | 0.17869701   |
| cov1_2_4_7_8_9_10  | 37.0367 | -356.681 | 0.6439957 | 0 | -0.17278816  | 0 | 0.01834477   |
| cov1_2_3_7_8_10_11 | 37.0385 | -356.682 | 0.6363788 | 0 | -0.095353355 | 0 | 0.17768916   |
| cov1_4_7_8_9_10_11 | 37.047  | -356.686 | 0.6446929 | 0 | -0.16323776  | 0 | 0            |
| cov1_4_5_6_7_10_11 | 37.0496 | -356.688 | 0.6468864 | 0 | -0.023496117 | 0 | 0            |
| cov1_2_4_5_6_8_10  | 37.0862 | -356.706 | 0.648813  | 0 | 0.013925366  | 0 | -0.044821792 |
| cov2_4_5_6_8_10_11 | 37.0876 | -356.706 | 0.6483804 | 0 | 0            | 0 | -0.041297185 |
| cov1_2_4_5_8_10_11 | 37.0997 | -356.713 | 0.6486857 | 0 | -0.005318414 | 0 | -0.046497805 |
| cov1_2_4_6_7_9_10  | 37.1351 | -356.73  | 0.6440436 | 0 | -0.1435187   | 0 | 0.019592449  |
| cov1_4_5_6_8_10_11 | 37.1379 | -356.732 | 0.6472934 | 0 | -0.0200673   | 0 | 0            |
| cov1_2_4_6_7_8_9   | 37.147  | -356.736 | 0.6461852 | 0 | -0.14554961  | 0 | 0.017198795  |
| cov1_4_6_7_9_10_11 | 37.147  | -356.736 | 0.6445572 | 0 | -0.13616755  | 0 | 0            |
| cov2_3_6_7_8_10_11 | 37.1549 | -356.74  | 0.6384171 | 0 | 0            | 0 | 0.15559189   |
| cov1_4_6_7_8_9_11  | 37.1559 | -356.741 | 0.6465502 | 0 | -0.13955309  | 0 | 0            |
| cov1_2_4_7_9_10_11 | 37.1617 | -356.744 | 0.6440031 | 0 | -0.1713185   | 0 | 0.018468683  |
| cov1_2_4_7_8_9_11  | 37.1689 | -356.747 | 0.6461121 | 0 | -0.17126623  | 0 | 0.016112836  |
| cov2_3_4_5_7_8_11  | 37.1861 | -356.756 | 0.6311938 | 0 | 0            | 0 | 0.13677692   |
| cov1_2_3_6_7_10_11 | 37.1935 | -356.759 | 0.6361445 | 0 | -0.080885886 | 0 | 0.17870377   |
| cov1_2_3_6_8_10_11 | 37.1937 | -356.76  | 0.6363229 | 0 | -0.080306246 | 0 | 0.17884807   |
| cov1_2_4_6_8_9_10  | 37.2336 | -356.78  | 0.6444002 | 0 | -0.14132007  | 0 | 0.019005316  |
| cov1_4_6_8_9_10_11 | 37.2449 | -356.785 | 0.6449941 | 0 | -0.13347147  | 0 | 0            |
| cov1_2_4_8_9_10_11 | 37.2642 | -356.795 | 0.6444758 | 0 | -0.17032806  | 0 | 0.017880536  |
| cov1_2_4_6_7_9_11  | 37.2662 | -356.796 | 0.6459317 | 0 | -0.14296634  | 0 | 0.017175858  |
| cov1_2_4_6_8_9_11  | 37.3647 | -356.845 | 0.6463834 | 0 | -0.14006317  | 0 | 0.016686634  |
| cov4_6_7_8_9_10_11 | 37.3675 | -356.846 | 0.6487587 | 0 | 0            | 0 | 0            |
| cov2_4_6_7_8_9_10  | 37.3928 | -356.859 | 0.6476484 | 0 | 0            | 0 | -0.014787686 |
| cov2_4_6_7_9_10_11 | 37.4673 | -356.896 | 0.6487126 | 0 | 0            | 0 | -0.009835206 |
| cov1_2_4_6_7_8_10  | 37.4797 | -356.903 | 0.647631  | 0 | -0.14103694  | 0 | 0.021078872  |
| cov2_4_6_7_8_9_11  | 37.4903 | -356.908 | 0.6507923 | 0 | 0            | 0 | -0.012599026 |
| cov1_4_6_7_8_10_11 | 37.4931 | -356.909 | 0.6480949 | 0 | -0.13369021  | 0 | 0            |
| cov1_2_4_7_8_10_11 | 37.4989 | -356.912 | 0.6475323 | 0 | -0.16538852  | 0 | 0.020050846  |
| cov2_4_6_8_9_10_11 | 37.5531 | -356.939 | 0.6490289 | 0 | 0            | 0 | -0.009734067 |
| cov1_2_4_6_7_10_11 | 37.5984 | -356.962 | 0.6473507 | 0 | -0.13865229  | 0 | 0.021029853  |
| cov1_2_4_6_8_10_11 | 37.6976 | -357.012 | 0.6477999 | 0 | -0.13572838  | 0 | 0.020538207  |
| cov2_4_6_7_8_10_11 | 37.8036 | -357.065 | 0.6519652 | 0 | 0            | 0 | -0.007976827 |
| cov1_3_5_7_8_9_10  | 37.848  | -357.087 | 0.6358094 | 0 | 0.13667796   | 0 | 0            |
| cov2_4_7_8_9_10_11 | 37.9078 | -357.117 | 0.6546429 | 0 | 0            | 0 | -0.051151497 |
| cov1_3_5_6_7_8_9   | 37.9473 | -357.136 | 0.6373839 | 0 | 0.12156148   | 0 | 0            |
| cov1_3_5_7_8_9_11  | 37.9485 | -357.137 | 0.6364812 | 0 | 0.12882687   | 0 | 0            |
| cov1_3_5_6_8_9_10  | 37.9856 | -357.156 | 0.6358287 | 0 | 0.13116787   | 0 | 0            |
| cov1_3_5_8_9_10_11 | 37.9866 | -357.156 | 0.6351223 | 0 | 0.1371391    | 0 | 0            |
| cov1_3_7_8_9_10_11 | 37.9892 | -357.157 | 0.6372182 | 0 | 0.040421185  | 0 | 0            |
| cov1_3_6_7_8_9_10  | 37.9905 | -357.158 | 0.6378744 | 0 | 0.036880748  | 0 | 0            |
| cov3_5_6_7_8_9_10  | 37.9991 | -357.162 | 0.6368478 | 0 | 0            | 0 | 0            |
| cov1_3_5_7_9_10_11 | 38.0034 | -357.164 | 0.6351071 | 0 | 0.13069269   | 0 | 0            |
| cov1_3_5_6_7_9_10  | 38.004  | -357.165 | 0.6358552 | 0 | 0.12608912   | 0 | 0            |
| cov3_6_7_8_9_10_11 | 38.0088 | -357.167 | 0.6365832 | 0 | 0            | 0 | 0            |

|                    |         |          |           |   |              |   |              |
|--------------------|---------|----------|-----------|---|--------------|---|--------------|
| cov1_3_5_6_9_10_11 | 38.0252 | -357.175 | 0.6351523 | 0 | 0.10069326   | 0 | 0            |
| cov3_5_7_8_9_10_11 | 38.0776 | -357.201 | 0.6345033 | 0 | 0            | 0 | 0            |
| cov3_5_6_7_8_9_11  | 38.0816 | -357.204 | 0.6367004 | 0 | 0            | 0 | 0            |
| cov1_3_6_7_8_9_11  | 38.0868 | -357.206 | 0.6386007 | 0 | 0.034328357  | 0 | 0            |
| cov1_3_5_6_8_9_11  | 38.0883 | -357.207 | 0.6366327 | 0 | 0.12679972   | 0 | 0            |
| cov1_3_5_6_7_9_11  | 38.1071 | -357.216 | 0.6366121 | 0 | 0.12127679   | 0 | 0            |
| cov1_2_4_5_9_10_11 | 38.1401 | -357.233 | 0.6593424 | 0 | 0.063760125  | 0 | -0.084364189 |
| cov1_3_6_7_9_10_11 | 38.1493 | -357.237 | 0.637211  | 0 | 0.037688646  | 0 | 0            |
| cov3_5_6_8_9_10_11 | 38.1508 | -357.238 | 0.6353074 | 0 | 0            | 0 | 0            |
| cov1_3_6_8_9_10_11 | 38.1521 | -357.239 | 0.6373763 | 0 | 0.038465165  | 0 | 0            |
| cov3_5_6_7_9_10_11 | 38.1525 | -357.239 | 0.6352631 | 0 | 0            | 0 | 0            |
| cov2_4_5_6_9_10_11 | 38.1875 | -357.256 | 0.657858  | 0 | 0            | 0 | -0.065025414 |
| cov1_3_5_6_7_8_10  | 38.2391 | -357.282 | 0.6386759 | 0 | 0.13408883   | 0 | 0            |
| cov1_2_4_5_6_9_10  | 38.2393 | -357.282 | 0.6571223 | 0 | 0.049833817  | 0 | -0.090724652 |
| cov1_3_5_7_8_10_11 | 38.2416 | -357.284 | 0.6377091 | 0 | 0.14289104   | 0 | 0            |
| cov1_2_3_5_6_7_8   | 38.2587 | -357.292 | 0.6324401 | 0 | 0.13904481   | 0 | 0.21238463   |
| cov1_2_3_5_7_8_11  | 38.2866 | -357.306 | 0.632041  | 0 | 0.16685878   | 0 | 0.21482449   |
| cov1_2_4_5_6_7_8   | 38.2914 | -357.308 | 0.6467185 | 0 | 0.11150841   | 0 | -0.026222729 |
| cov1_2_4_5_7_8_11  | 38.2959 | -357.311 | 0.6468693 | 0 | 0.12507452   | 0 | -0.024884688 |
| cov1_4_5_6_7_8_11  | 38.3083 | -357.317 | 0.6460864 | 0 | 0.093082569  | 0 | 0            |
| cov1_2_4_5_6_9_11  | 38.3093 | -357.317 | 0.6611822 | 0 | 0.064643061  | 0 | -0.085133826 |
| cov1_4_5_6_9_10_11 | 38.3255 | -357.325 | 0.6570721 | 0 | 0.008232067  | 0 | 0            |
| cov1_3_5_6_8_10_11 | 38.3785 | -357.352 | 0.6378839 | 0 | 0.13893019   | 0 | 0            |
| cov1_2_3_5_6_8_11  | 38.3902 | -357.358 | 0.6324932 | 0 | 0.1489607    | 0 | 0.21332124   |
| cov1_3_5_6_7_10_11 | 38.3982 | -357.362 | 0.6378666 | 0 | 0.13345965   | 0 | 0            |
| cov3_5_6_7_8_10_11 | 38.404  | -357.365 | 0.6381036 | 0 | 0            | 0 | 0            |
| cov1_3_6_7_8_10_11 | 38.409  | -357.367 | 0.6401744 | 0 | 0.038358681  | 0 | 0            |
| cov1_2_4_5_6_7_11  | 38.4151 | -357.37  | 0.6466483 | 0 | 0.11605221   | 0 | -0.025504717 |
| cov1_2_3_5_6_7_11  | 38.4183 | -357.372 | 0.6324721 | 0 | 0.14438112   | 0 | 0.21277696   |
| cov2_4_5_6_7_8_11  | 38.4332 | -357.379 | 0.6445593 | 0 | 0            | 0 | 0.011642476  |
| cov2_3_5_6_7_8_11  | 38.4633 | -357.394 | 0.6326519 | 0 | 0            | 0 | 0.23272179   |
| cov1_2_4_5_6_8_11  | 38.4988 | -357.412 | 0.6472054 | 0 | 0.12005964   | 0 | -0.026788239 |
| cov1_2_4_5_6_10_11 | 38.5966 | -357.461 | 0.662474  | 0 | 0.075707055  | 0 | -0.083962915 |
| cov1_2_5_7_8_9_10  | 39.0901 | -357.708 | 0.6414366 | 0 | -0.21339422  | 0 | 0.1616624    |
| cov1_2_5_6_7_9_10  | 39.1978 | -357.762 | 0.6413867 | 0 | -0.19516835  | 0 | 0.16292428   |
| cov1_2_5_7_9_10_11 | 39.2073 | -357.766 | 0.6418639 | 0 | -0.20847466  | 0 | 0.16184094   |
| cov1_2_5_6_7_8_9   | 39.2487 | -357.787 | 0.6437376 | 0 | -0.20076655  | 0 | 0.16241614   |
| cov1_2_5_7_8_9_11  | 39.2564 | -357.791 | 0.6441675 | 0 | -0.21273793  | 0 | 0.16147436   |
| cov1_2_4_6_9_10_11 | 39.3164 | -357.821 | 0.6608101 | 0 | -0.13127326  | 0 | 0.001783398  |
| cov1_2_5_6_8_9_10  | 39.3227 | -357.824 | 0.6417572 | 0 | -0.19215069  | 0 | 0.16313821   |
| cov1_2_5_8_9_10_11 | 39.3343 | -357.83  | 0.6423638 | 0 | -0.20675138  | 0 | 0.16194859   |
| cov1_2_5_6_7_9_11  | 39.3644 | -357.845 | 0.6439443 | 0 | -0.19555569  | 0 | 0.16264517   |
| cov1_2_3_4_6_7_8   | 39.434  | -357.88  | 0.6432732 | 0 | -0.090320148 | 0 | 0.15000081   |
| cov1_2_3_4_7_8_11  | 39.4395 | -357.882 | 0.6435285 | 0 | -0.073130935 | 0 | 0.15108302   |
| cov1_2_7_8_9_10_11 | 39.4834 | -357.904 | 0.6409835 | 0 | -0.10078374  | 0 | 0.17152584   |
| cov1_2_6_7_8_9_10  | 39.4864 | -357.906 | 0.6404008 | 0 | -0.10112356  | 0 | 0.17149518   |
| cov1_2_5_6_8_9_11  | 39.4887 | -357.907 | 0.644425  | 0 | -0.19173619  | 0 | 0.1629225    |

|                      |         |          |           |   |              |   |              |
|----------------------|---------|----------|-----------|---|--------------|---|--------------|
| cov1_2_5_6_7_8_10    | 39.5459 | -357.936 | 0.6449793 | 0 | -0.19031495  | 0 | 0.16434999   |
| cov1_2_5_7_8_10_11   | 39.5515 | -357.938 | 0.6453796 | 0 | -0.20046817  | 0 | 0.16354747   |
| cov2_3_4_6_7_8_11    | 39.5557 | -357.941 | 0.6456828 | 0 | 0            | 0 | 0.13265715   |
| cov1_2_3_4_6_7_11    | 39.5662 | -357.946 | 0.6435932 | 0 | -0.083988795 | 0 | 0.14941133   |
| cov2_5_6_7_8_9_10    | 39.5751 | -357.95  | 0.6441147 | 0 | 0            | 0 | 0.12716512   |
| cov1_2_6_7_9_10_11   | 39.6035 | -357.964 | 0.6408058 | 0 | -0.093785341 | 0 | 0.17183195   |
| cov1_2_3_6_7_8_11    | 39.6133 | -357.969 | 0.6414704 | 0 | -0.072572433 | 0 | 0.19590567   |
| cov1_2_3_4_6_8_11    | 39.6175 | -357.971 | 0.6437844 | 0 | -0.081361029 | 0 | 0.15143091   |
| cov2_5_6_7_9_10_11   | 39.6309 | -357.978 | 0.6457252 | 0 | 0            | 0 | 0.13162117   |
| cov2_6_7_8_9_10_11   | 39.6369 | -357.981 | 0.6440471 | 0 | 0            | 0 | 0.14630534   |
| cov1_2_5_6_7_10_11   | 39.6614 | -357.993 | 0.6451632 | 0 | -0.18522017  | 0 | 0.16457162   |
| cov1_2_6_7_8_9_11    | 39.6994 | -358.012 | 0.6434393 | 0 | -0.09474982  | 0 | 0.17166431   |
| cov2_5_6_7_8_9_11    | 39.7112 | -358.018 | 0.648265  | 0 | 0            | 0 | 0.1300176    |
| cov1_2_6_8_9_10_11   | 39.727  | -358.026 | 0.6412856 | 0 | -0.090035653 | 0 | 0.17209577   |
| cov2_5_6_8_9_10_11   | 39.7385 | -358.032 | 0.6460841 | 0 | 0            | 0 | 0.13242837   |
| cov1_2_5_6_8_10_11   | 39.7859 | -358.056 | 0.6456392 | 0 | -0.1813877   | 0 | 0.16484725   |
| cov2_5_7_8_9_10_11   | 39.7992 | -358.062 | 0.6483252 | 0 | 0            | 0 | 0.10796924   |
| cov1_2_6_7_8_10_11   | 39.9327 | -358.129 | 0.6443832 | 0 | -0.092024198 | 0 | 0.17303409   |
| cov2_5_6_7_8_10_11   | 39.9619 | -358.144 | 0.6490115 | 0 | 0            | 0 | 0.13364203   |
| cov1_2_4_6_7_8_11    | 39.9982 | -358.162 | 0.6473542 | 0 | -0.10665035  | 0 | 0.10004967   |
| cov1_3_4_6_7_8_11    | 40.0905 | -358.208 | 0.6494177 | 0 | -0.033301685 | 0 | 0            |
| cov1_3_5_6_7_8_11    | 40.1915 | -358.258 | 0.6396439 | 0 | 0.26365877   | 0 | 0            |
| cov1_5_6_7_8_9_10    | 40.2218 | -358.274 | 0.6467664 | 0 | -0.097932386 | 0 | 0            |
| cov1_5_7_8_9_10_11   | 40.2218 | -358.274 | 0.6468228 | 0 | -0.097475788 | 0 | 0            |
| cov1_5_6_7_9_10_11   | 40.3406 | -358.333 | 0.64666   | 0 | -0.094786416 | 0 | 0            |
| cov5_6_7_8_9_10_11   | 40.3471 | -358.336 | 0.6485745 | 0 | 0            | 0 | 0            |
| cov1_5_6_7_8_9_11    | 40.3849 | -358.355 | 0.6487957 | 0 | -0.1011044   | 0 | 0            |
| cov1_5_6_8_9_10_11   | 40.4681 | -358.397 | 0.6471457 | 0 | -0.090722202 | 0 | 0            |
| cov1_3_4_5_7_8_9_10  | 40.6933 | -355.112 | 0.6327335 | 0 | 0.19723192   | 0 | 0            |
| cov1_5_6_7_8_10_11   | 40.7106 | -358.518 | 0.6501303 | 0 | -0.08964998  | 0 | 0            |
| cov1_6_7_8_9_10_11   | 40.7584 | -358.542 | 0.6466854 | 0 | 0.021504088  | 0 | 0            |
| cov1_3_4_5_7_8_9_11  | 40.7929 | -355.162 | 0.6336393 | 0 | 0.18992925   | 0 | 0            |
| cov1_2_3_4_5_7_8_9   | 40.7939 | -355.162 | 0.6348315 | 0 | 0.20749328   | 0 | -0.014203201 |
| cov1_2_3_4_5_8_9_10  | 40.7985 | -355.165 | 0.6331283 | 0 | 0.2137168    | 0 | -0.014337727 |
| cov1_3_4_5_6_7_8_9   | 40.7987 | -355.165 | 0.6343952 | 0 | 0.19920549   | 0 | 0            |
| cov1_3_4_5_8_9_10_11 | 40.7998 | -355.165 | 0.6320784 | 0 | 0.19747724   | 0 | 0            |
| cov1_3_4_5_6_8_9_10  | 40.803  | -355.167 | 0.6326799 | 0 | 0.20738895   | 0 | 0            |
| cov1_2_3_4_5_7_9_10  | 40.8431 | -355.187 | 0.6331513 | 0 | 0.20837181   | 0 | -0.014201918 |
| cov1_3_4_5_7_9_10_11 | 40.8438 | -355.187 | 0.6320689 | 0 | 0.19180618   | 0 | 0            |
| cov1_3_4_5_6_7_9_10  | 40.8469 | -355.189 | 0.632713  | 0 | 0.20369973   | 0 | 0            |
| cov1_2_3_4_5_8_9_11  | 40.8974 | -355.214 | 0.6340743 | 0 | 0.20748544   | 0 | -0.015446436 |
| cov1_3_4_5_6_8_9_11  | 40.9019 | -355.216 | 0.633595  | 0 | 0.20248537   | 0 | 0            |
| cov1_2_3_4_5_6_8_9   | 40.9024 | -355.217 | 0.6347697 | 0 | 0.21763077   | 0 | -0.014285942 |
| cov1_2_3_4_5_7_9_11  | 40.9427 | -355.237 | 0.6340746 | 0 | 0.20175723   | 0 | -0.015360755 |
| cov1_3_4_5_6_7_9_11  | 40.9463 | -355.239 | 0.6335872 | 0 | 0.19840107   | 0 | 0            |
| cov1_2_3_4_5_6_7_9   | 40.9478 | -355.239 | 0.6348033 | 0 | 0.2138011    | 0 | -0.014039582 |
| cov1_3_4_5_7_8_10_11 | 41.0376 | -355.284 | 0.6347882 | 0 | 0.20386886   | 0 | 0            |



|                      |         |          |           |   |              |   |              |
|----------------------|---------|----------|-----------|---|--------------|---|--------------|
| cov1_2_3_4_5_7_8_10  | 41.0404 | -355.286 | 0.6359737 | 0 | 0.22077193   | 0 | -0.012664961 |
| cov1_3_4_5_6_7_8_10  | 41.0444 | -355.288 | 0.6355812 | 0 | 0.21159509   | 0 | 0            |
| cov1_2_5_6_7_8_11    | 41.0636 | -358.695 | 0.6445861 | 0 | -0.079961882 | 0 | 0.18679697   |
| cov1_3_4_5_6_9_10_11 | 41.0675 | -355.299 | 0.6318876 | 0 | 0.13396911   | 0 | 0            |
| cov1_2_3_4_5_9_10_11 | 41.0691 | -355.3   | 0.6323241 | 0 | 0.13025027   | 0 | -0.01303856  |
| cov1_2_3_4_5_6_9_10  | 41.0825 | -355.307 | 0.6335408 | 0 | 0.1484478    | 0 | -0.010825524 |
| cov3_4_5_6_7_8_9_10  | 41.1136 | -355.322 | 0.6341827 | 0 | 0            | 0 | 0            |
| cov1_2_3_4_5_8_10_11 | 41.1421 | -355.336 | 0.6351772 | 0 | 0.2202919    | 0 | -0.013960992 |
| cov1_3_4_5_6_8_10_11 | 41.1462 | -355.339 | 0.6347505 | 0 | 0.21453943   | 0 | 0            |
| cov1_2_3_4_5_6_8_10  | 41.1482 | -355.34  | 0.63591   | 0 | 0.22900506   | 0 | -0.012897214 |
| cov3_4_5_6_7_8_9_11  | 41.1699 | -355.35  | 0.6335747 | 0 | 0            | 0 | 0            |
| cov2_3_4_5_7_8_9_10  | 41.1787 | -355.355 | 0.6328348 | 0 | 0            | 0 | 0.055705278  |
| cov3_4_5_7_8_9_10_11 | 41.1791 | -355.355 | 0.6316448 | 0 | 0            | 0 | 0            |
| cov2_3_4_5_6_7_8_9   | 41.1801 | -355.355 | 0.6346056 | 0 | 0            | 0 | 0.036690886  |
| cov1_2_3_4_5_6_9_11  | 41.1805 | -355.356 | 0.6339363 | 0 | 0.13997344   | 0 | -0.012530915 |
| cov1_2_3_4_5_7_10_11 | 41.1878 | -355.359 | 0.6351784 | 0 | 0.21462377   | 0 | -0.013875268 |
| cov1_3_4_5_6_7_10_11 | 41.1912 | -355.361 | 0.634744  | 0 | 0.21050826   | 0 | 0            |
| cov1_2_3_4_5_6_7_10  | 41.1942 | -355.363 | 0.6359482 | 0 | 0.22523024   | 0 | -0.012649697 |
| cov2_3_4_5_7_8_9_11  | 41.2119 | -355.371 | 0.6320268 | 0 | 0            | 0 | 0.04530983   |
| cov3_4_5_6_8_9_10_11 | 41.2174 | -355.374 | 0.6320263 | 0 | 0            | 0 | 0            |
| cov2_3_4_5_6_8_9_10  | 41.2189 | -355.375 | 0.6328707 | 0 | 0            | 0 | 0.03922695   |
| cov3_4_5_6_7_9_10_11 | 41.2402 | -355.386 | 0.6319914 | 0 | 0            | 0 | 0            |
| cov2_3_4_5_6_7_9_10  | 41.2452 | -355.388 | 0.6328917 | 0 | 0            | 0 | 0.038159455  |
| cov2_3_4_5_8_9_10_11 | 41.2535 | -355.392 | 0.6304246 | 0 | 0            | 0 | 0.047932763  |
| cov2_3_4_5_6_9_10_11 | 41.2704 | -355.401 | 0.6311159 | 0 | 0            | 0 | 0.02575849   |
| cov2_3_4_5_7_9_10_11 | 41.2705 | -355.401 | 0.6304617 | 0 | 0            | 0 | 0.046027324  |
| cov2_3_4_5_6_8_9_11  | 41.2852 | -355.408 | 0.6326499 | 0 | 0            | 0 | 0.034069859  |
| cov2_3_4_5_6_7_9_11  | 41.3115 | -355.421 | 0.6326561 | 0 | 0            | 0 | 0.032932188  |
| cov1_2_3_4_5_6_10_11 | 41.435  | -355.483 | 0.6350832 | 0 | 0.15012355   | 0 | -0.011114093 |
| cov3_4_5_6_7_8_10_11 | 41.4651 | -355.498 | 0.6349748 | 0 | 0            | 0 | 0            |
| cov2_3_4_5_6_7_8_10  | 41.4716 | -355.501 | 0.6359628 | 0 | 0            | 0 | 0.041037957  |
| cov2_3_4_5_7_8_10_11 | 41.5155 | -355.523 | 0.6332669 | 0 | 0            | 0 | 0.050848169  |
| cov2_3_4_5_6_8_10_11 | 41.5735 | -355.552 | 0.6339162 | 0 | 0            | 0 | 0.038132204  |
| cov2_3_4_5_6_7_10_11 | 41.5995 | -355.565 | 0.6339177 | 0 | 0            | 0 | 0.036983676  |
| cov1_2_5_6_9_10_11   | 42.2752 | -359.3   | 0.661592  | 0 | -0.15415842  | 0 | 0.16749083   |
| cov1_3_4_5_6_7_8_11  | 42.4842 | -356.008 | 0.6344392 | 0 | 0.32609846   | 0 | 0            |
| cov1_2_3_4_5_6_7_8   | 42.4853 | -356.008 | 0.6346627 | 0 | 0.3252494    | 0 | 0.005084139  |
| cov1_2_3_4_5_7_8_11  | 42.5062 | -356.018 | 0.6339724 | 0 | 0.34726943   | 0 | 0.006738086  |
| cov1_2_3_4_5_6_8_11  | 42.5914 | -356.061 | 0.6342401 | 0 | 0.3316841    | 0 | 0.004556875  |
| cov1_2_3_4_5_6_7_11  | 42.6361 | -356.083 | 0.6342353 | 0 | 0.32754543   | 0 | 0.004755416  |
| cov1_2_3_4_7_8_9_10  | 42.709  | -356.12  | 0.6374115 | 0 | -0.14268041  | 0 | 0.079322329  |
| cov1_2_3_4_6_7_8_9   | 42.78   | -356.155 | 0.6388499 | 0 | -0.11944649  | 0 | 0.079478598  |
| cov1_2_3_4_7_8_9_11  | 42.7947 | -356.163 | 0.6385836 | 0 | -0.14378905  | 0 | 0.078499398  |
| cov1_2_3_4_6_7_9_10  | 42.8407 | -356.186 | 0.6374107 | 0 | -0.11693823  | 0 | 0.079513477  |
| cov1_2_3_4_6_8_9_10  | 42.8609 | -356.196 | 0.6374687 | 0 | -0.11585487  | 0 | 0.080954572  |
| cov1_2_3_4_7_9_10_11 | 42.8617 | -356.196 | 0.6372168 | 0 | -0.14441173  | 0 | 0.078417893  |
| cov1_3_4_6_7_8_9_10  | 42.874  | -356.202 | 0.6401298 | 0 | -0.093867895 | 0 | 0            |

|                      |         |          |           |   |              |   |              |
|----------------------|---------|----------|-----------|---|--------------|---|--------------|
| cov1_2_3_4_8_9_10_11 | 42.8826 | -356.207 | 0.6373549 | 0 | -0.1429062   | 0 | 0.079980384  |
| cov1_3_4_7_8_9_10_11 | 42.8841 | -356.207 | 0.6397108 | 0 | -0.11648735  | 0 | 0            |
| cov1_2_3_4_6_9_10_11 | 42.9083 | -356.22  | 0.6378338 | 0 | -0.11291669  | 0 | 0.088146998  |
| cov1_2_3_4_6_7_9_11  | 42.9252 | -356.228 | 0.6383848 | 0 | -0.11824763  | 0 | 0.078585326  |
| cov1_2_3_4_6_8_9_11  | 42.9444 | -356.238 | 0.6385004 | 0 | -0.11668791  | 0 | 0.080090117  |
| cov2_3_4_6_7_8_9_10  | 42.9477 | -356.239 | 0.6394054 | 0 | 0            | 0 | 0.054591717  |
| cov1_3_4_6_7_8_9_11  | 42.9537 | -356.242 | 0.6408829 | 0 | -0.096606226 | 0 | 0            |
| cov1_3_4_6_7_9_10_11 | 43.0152 | -356.273 | 0.6395493 | 0 | -0.093724142 | 0 | 0            |
| cov2_3_4_6_7_8_9_11  | 43.0162 | -356.274 | 0.6415792 | 0 | 0            | 0 | 0.056552688  |
| cov3_4_6_7_8_9_10_11 | 43.0325 | -356.282 | 0.641732  | 0 | 0            | 0 | 0            |
| cov1_3_4_6_8_9_10_11 | 43.0425 | -356.287 | 0.6397165 | 0 | -0.091422518 | 0 | 0            |
| cov2_3_4_6_7_9_10_11 | 43.0663 | -356.299 | 0.6402016 | 0 | 0            | 0 | 0.057148895  |
| cov2_3_4_6_8_9_10_11 | 43.0813 | -356.306 | 0.6402721 | 0 | 0            | 0 | 0.058727293  |
| cov1_2_3_4_6_7_8_10  | 43.1193 | -356.325 | 0.6405312 | 0 | -0.11489205  | 0 | 0.082958438  |
| cov1_2_3_4_7_8_10_11 | 43.1316 | -356.331 | 0.6402174 | 0 | -0.13818105  | 0 | 0.081998082  |
| cov1_2_3_5_7_8_9_10  | 43.1368 | -356.334 | 0.6303243 | 0 | 0.022013703  | 0 | 0.18811631   |
| cov2_3_5_7_8_9_10_11 | 43.1411 | -356.336 | 0.6299205 | 0 | 0            | 0 | 0.19136746   |
| cov2_3_5_6_7_8_9_10  | 43.1419 | -356.336 | 0.6304054 | 0 | 0            | 0 | 0.19096531   |
| cov2_4_5_6_7_8_9_10  | 43.2267 | -356.379 | 0.6450779 | 0 | 0            | 0 | -0.044826208 |
| cov1_2_4_5_7_8_9_10  | 43.2349 | -356.383 | 0.6449673 | 0 | -0.01612448  | 0 | -0.045689384 |
| cov2_4_5_7_8_9_10_11 | 43.2383 | -356.385 | 0.6454585 | 0 | 0            | 0 | -0.052228223 |
| cov1_2_3_5_7_8_9_11  | 43.2423 | -356.387 | 0.6315961 | 0 | 0.018882467  | 0 | 0.18783034   |
| cov1_2_3_5_6_7_8_9   | 43.2435 | -356.387 | 0.6319198 | 0 | 0.022787825  | 0 | 0.18811367   |
| cov2_3_5_6_7_8_9_11  | 43.2462 | -356.389 | 0.6315007 | 0 | 0            | 0 | 0.19034893   |
| cov1_2_3_4_6_7_10_11 | 43.2637 | -356.397 | 0.640022  | 0 | -0.11400497  | 0 | 0.082027638  |
| cov1_2_3_5_6_8_9_10  | 43.2704 | -356.401 | 0.6302649 | 0 | 0.031217808  | 0 | 0.18902777   |
| cov1_2_3_5_8_9_10_11 | 43.2706 | -356.401 | 0.6301155 | 0 | 0.02637597   | 0 | 0.18867038   |
| cov1_4_5_6_7_8_9_10  | 43.2776 | -356.404 | 0.6435531 | 0 | -0.034706789 | 0 | 0            |
| cov2_3_5_6_8_9_10_11 | 43.2787 | -356.405 | 0.6299822 | 0 | 0            | 0 | 0.1925298    |
| cov1_2_3_4_6_8_10_11 | 43.2836 | -356.407 | 0.6401414 | 0 | -0.11242341  | 0 | 0.083533174  |
| cov1_4_5_7_8_9_10_11 | 43.2887 | -356.41  | 0.6435368 | 0 | -0.051859412 | 0 | 0            |
| cov4_5_6_7_8_9_10_11 | 43.2929 | -356.412 | 0.6441798 | 0 | 0            | 0 | 0            |
| cov1_2_3_5_6_7_9_10  | 43.2974 | -356.414 | 0.6302883 | 0 | 0.026984513  | 0 | 0.18849919   |
| cov1_2_3_5_7_9_10_11 | 43.2977 | -356.414 | 0.630094  | 0 | 0.020596344  | 0 | 0.18802603   |
| cov2_3_5_6_7_9_10_11 | 43.3028 | -356.417 | 0.6299509 | 0 | 0            | 0 | 0.19136858   |
| cov1_3_4_6_7_8_10_11 | 43.3082 | -356.42  | 0.6426577 | 0 | -0.091182143 | 0 | 0            |
| cov2_3_4_7_8_9_10_11 | 43.3108 | -356.421 | 0.6449606 | 0 | 0            | 0 | 0.027297048  |
| cov2_3_4_6_7_8_10_11 | 43.3393 | -356.435 | 0.6430271 | 0 | 0            | 0 | 0.060691603  |
| cov2_4_5_6_7_9_10_11 | 43.3514 | -356.441 | 0.6447979 | 0 | 0            | 0 | -0.043856606 |
| cov1_2_4_5_6_7_9_10  | 43.3516 | -356.441 | 0.6449465 | 0 | 0.001941651  | 0 | -0.043984824 |
| cov1_2_4_5_7_9_10_11 | 43.3641 | -356.447 | 0.6448144 | 0 | -0.016489625 | 0 | -0.045538166 |
| cov1_2_3_5_6_9_10_11 | 43.367  | -356.449 | 0.6298281 | 0 | -0.007457297 | 0 | 0.18472375   |
| cov1_2_3_5_6_8_9_11  | 43.3751 | -356.453 | 0.631547  | 0 | 0.029680251  | 0 | 0.18886124   |
| cov2_4_5_6_7_8_9_11  | 43.3888 | -356.46  | 0.6473163 | 0 | 0            | 0 | -0.046881071 |
| cov1_2_4_5_6_7_8_9   | 43.3889 | -356.46  | 0.6473815 | 0 | -0.003573537 | 0 | -0.045225153 |
| cov1_2_4_5_7_8_9_11  | 43.3982 | -356.465 | 0.6472089 | 0 | -0.020290054 | 0 | -0.046686573 |
| cov1_4_5_6_7_9_10_11 | 43.4014 | -356.466 | 0.6434481 | 0 | -0.0313439   | 0 | 0            |

|                      |         |          |           |   |              |   |              |
|----------------------|---------|----------|-----------|---|--------------|---|--------------|
| cov1_2_3_5_6_7_9_11  | 43.4031 | -356.467 | 0.6315248 | 0 | 0.0250489    | 0 | 0.18830827   |
| cov1_2_3_6_7_8_9_10  | 43.4316 | -356.481 | 0.633479  | 0 | -0.089006873 | 0 | 0.17728117   |
| cov1_2_3_7_8_9_10_11 | 43.4349 | -356.483 | 0.6334381 | 0 | -0.10045685  | 0 | 0.17639063   |
| cov1_2_4_5_6_8_9_10  | 43.4364 | -356.484 | 0.6453065 | 0 | 0.005501362  | 0 | -0.045303921 |
| cov2_4_5_6_8_9_10_11 | 43.4367 | -356.484 | 0.6451474 | 0 | 0            | 0 | -0.043848882 |
| cov1_4_5_6_7_8_9_11  | 43.4416 | -356.486 | 0.6458157 | 0 | -0.038246822 | 0 | 0            |
| cov2_3_4_5_6_7_8_11  | 43.4441 | -356.487 | 0.6333337 | 0 | 0            | 0 | 0.088657746  |
| cov1_2_4_5_8_9_10_11 | 43.4513 | -356.491 | 0.6452727 | 0 | -0.013623506 | 0 | -0.046906966 |
| cov1_2_3_6_7_8_9_11  | 43.4663 | -356.499 | 0.634622  | 0 | -0.091638288 | 0 | 0.17703841   |
| cov1_4_5_6_8_9_10_11 | 43.4891 | -356.51  | 0.6438606 | 0 | -0.027933358 | 0 | 0            |
| cov1_2_3_5_7_8_10_11 | 43.5002 | -356.516 | 0.6327184 | 0 | 0.031528827  | 0 | 0.18990832   |
| cov1_2_3_5_6_7_8_10  | 43.5017 | -356.516 | 0.6331095 | 0 | 0.034008034  | 0 | 0.19007756   |
| cov2_3_5_6_7_8_10_11 | 43.5098 | -356.52  | 0.6326612 | 0 | 0            | 0 | 0.19360114   |
| cov2_3_6_7_8_9_10_11 | 43.5106 | -356.521 | 0.6357887 | 0 | 0            | 0 | 0.15238891   |
| cov1_2_4_5_6_7_9_11  | 43.5135 | -356.522 | 0.6470495 | 0 | -0.002092632 | 0 | -0.045036327 |
| cov1_2_3_6_7_9_10_11 | 43.5894 | -356.56  | 0.6332023 | 0 | -0.085542176 | 0 | 0.17744035   |
| cov1_2_3_6_8_9_10_11 | 43.59   | -356.56  | 0.633392  | 0 | -0.084952511 | 0 | 0.17758397   |
| cov1_2_4_5_6_8_9_11  | 43.5988 | -356.565 | 0.6474993 | 0 | 0.002137986  | 0 | -0.046255072 |
| cov1_2_3_5_6_8_10_11 | 43.6323 | -356.582 | 0.6327002 | 0 | 0.040599296  | 0 | 0.19080063   |
| cov1_2_3_5_6_7_10_11 | 43.661  | -356.596 | 0.6326762 | 0 | 0.03602277   | 0 | 0.19025277   |
| cov2_4_5_6_7_8_10_11 | 43.6706 | -356.601 | 0.6482461 | 0 | 0            | 0 | -0.04254728  |
| cov1_2_4_5_6_7_8_10  | 43.6707 | -356.601 | 0.6485677 | 0 | 0.007208478  | 0 | -0.043956675 |
| cov1_2_4_5_7_8_10_11 | 43.6777 | -356.604 | 0.648379  | 0 | -0.007695377 | 0 | -0.045274376 |
| cov1_4_5_6_7_8_10_11 | 43.7205 | -356.626 | 0.6470192 | 0 | -0.026614165 | 0 | 0            |
| cov1_2_4_5_6_7_10_11 | 43.795  | -356.663 | 0.6482227 | 0 | 0.008569492  | 0 | -0.043787345 |
| cov1_2_4_6_7_8_9_10  | 43.8107 | -356.671 | 0.6441494 | 0 | -0.14718814  | 0 | 0.019462947  |
| cov1_4_6_7_8_9_10_11 | 43.8224 | -356.677 | 0.6447025 | 0 | -0.13956759  | 0 | 0            |
| cov1_2_3_6_7_8_10_11 | 43.8298 | -356.68  | 0.6362431 | 0 | -0.085582454 | 0 | 0.17846016   |
| cov1_2_4_7_8_9_10_11 | 43.831  | -356.681 | 0.6441563 | 0 | -0.17125326  | 0 | 0.018524238  |
| cov1_2_4_5_6_8_10_11 | 43.8805 | -356.706 | 0.6486663 | 0 | 0.012807259  | 0 | -0.045005346 |
| cov1_2_4_6_7_9_10_11 | 43.9297 | -356.73  | 0.644052  | 0 | -0.14391556  | 0 | 0.019400999  |
| cov1_2_4_6_7_8_9_11  | 43.9415 | -356.736 | 0.6460796 | 0 | -0.14631871  | 0 | 0.017092682  |
| cov1_2_4_6_8_9_10_11 | 44.0282 | -356.78  | 0.6444294 | 0 | -0.14102497  | 0 | 0.019047487  |
| cov2_4_6_7_8_9_10_11 | 44.1583 | -356.845 | 0.6489457 | 0 | 0            | 0 | -0.010517796 |
| cov1_2_4_6_7_8_10_11 | 44.2741 | -356.902 | 0.6475023 | 0 | -0.14198412  | 0 | 0.020945547  |
| cov1_3_5_6_7_8_9_10  | 44.6336 | -357.082 | 0.6359128 | 0 | 0.12105902   | 0 | 0            |
| cov1_3_5_7_8_9_10_11 | 44.6371 | -357.084 | 0.6351098 | 0 | 0.12990349   | 0 | 0            |
| cov1_3_5_6_7_8_9_11  | 44.7365 | -357.134 | 0.636675  | 0 | 0.11629427   | 0 | 0            |
| cov3_5_6_7_8_9_10_11 | 44.7699 | -357.15  | 0.635327  | 0 | 0            | 0 | 0            |
| cov1_3_5_6_8_9_10_11 | 44.7769 | -357.154 | 0.6352764 | 0 | 0.12704486   | 0 | 0            |
| cov1_3_6_7_8_9_10_11 | 44.782  | -357.156 | 0.6373259 | 0 | 0.032728438  | 0 | 0            |
| cov1_3_5_6_7_9_10_11 | 44.7945 | -357.163 | 0.6352437 | 0 | 0.12149315   | 0 | 0            |
| cov1_2_4_5_6_9_10_11 | 44.9339 | -357.232 | 0.6590653 | 0 | 0.067667808  | 0 | -0.084057654 |
| cov1_3_5_6_7_8_10_11 | 45.0276 | -357.279 | 0.6379328 | 0 | 0.12847964   | 0 | 0            |
| cov1_2_3_5_6_7_8_11  | 45.0532 | -357.292 | 0.632541  | 0 | 0.13972677   | 0 | 0.21242301   |
| cov1_2_4_5_6_7_8_11  | 45.0854 | -357.308 | 0.6469324 | 0 | 0.11310448   | 0 | -0.025970646 |
| cov1_2_5_6_7_8_9_10  | 45.8761 | -357.703 | 0.6414723 | 0 | -0.19816359  | 0 | 0.16288256   |

|                        |         |          |           |   |              |   |              |
|------------------------|---------|----------|-----------|---|--------------|---|--------------|
| cov1_2_5_7_8_9_10_11   | 45.8814 | -357.706 | 0.6419904 | 0 | -0.20804426  | 0 | 0.16208984   |
| cov1_2_5_6_7_9_10_11   | 45.9907 | -357.761 | 0.6417849 | 0 | -0.19215868  | 0 | 0.16315396   |
| cov1_2_5_6_7_8_9_11    | 46.0421 | -357.786 | 0.6440838 | 0 | -0.19818916  | 0 | 0.16262544   |
| cov1_2_5_6_8_9_10_11   | 46.1146 | -357.823 | 0.642264  | 0 | -0.18834575  | 0 | 0.16342977   |
| cov1_2_3_4_6_7_8_11    | 46.227  | -357.879 | 0.643685  | 0 | -0.087483268 | 0 | 0.15022051   |
| cov1_2_6_7_8_9_10_11   | 46.2775 | -357.904 | 0.6409585 | 0 | -0.096942402 | 0 | 0.17179308   |
| cov2_5_6_7_8_9_10_11   | 46.3213 | -357.926 | 0.6459327 | 0 | 0            | 0 | 0.13110461   |
| cov1_2_5_6_7_8_10_11   | 46.3394 | -357.935 | 0.6453046 | 0 | -0.18786151  | 0 | 0.16453407   |
| cov1_5_6_7_8_9_10_11   | 47.0164 | -358.274 | 0.6468217 | 0 | -0.09750961  | 0 | 0            |
| cov1_2_3_4_5_7_8_9_10  | 47.483  | -355.11  | 0.6331703 | 0 | 0.20753807   | 0 | -0.013928104 |
| cov1_3_4_5_7_8_9_10_11 | 47.4832 | -355.11  | 0.6320738 | 0 | 0.19097977   | 0 | 0            |
| cov1_3_4_5_6_7_8_9_10  | 47.4878 | -355.112 | 0.6327359 | 0 | 0.19875882   | 0 | 0            |
| cov1_2_3_4_5_7_8_9_11  | 47.5818 | -355.159 | 0.6340687 | 0 | 0.20072648   | 0 | -0.015109455 |
| cov1_3_4_5_6_7_8_9_11  | 47.587  | -355.162 | 0.6336159 | 0 | 0.19352251   | 0 | 0            |
| cov1_2_3_4_5_6_7_8_9   | 47.5884 | -355.162 | 0.6348296 | 0 | 0.20888081   | 0 | -0.014085838 |
| cov1_2_3_4_5_8_9_10_11 | 47.5887 | -355.162 | 0.6325134 | 0 | 0.20826558   | 0 | -0.015078114 |
| cov1_2_3_4_5_6_8_9_10  | 47.5926 | -355.164 | 0.6331201 | 0 | 0.21706605   | 0 | -0.014066775 |
| cov1_3_4_5_6_8_9_10_11 | 47.5933 | -355.165 | 0.6320459 | 0 | 0.20273936   | 0 | 0            |
| cov1_2_3_4_5_7_9_10_11 | 47.6327 | -355.184 | 0.6325018 | 0 | 0.20253735   | 0 | -0.014985774 |
| cov1_3_4_5_6_7_9_10_11 | 47.6365 | -355.186 | 0.6320281 | 0 | 0.1986225    | 0 | 0            |
| cov1_2_3_4_5_6_7_9_10  | 47.6367 | -355.186 | 0.6331467 | 0 | 0.21319846   | 0 | -0.013816056 |
| cov1_2_3_4_5_6_8_9_11  | 47.6908 | -355.214 | 0.6340265 | 0 | 0.21257696   | 0 | -0.015050442 |
| cov1_2_3_4_5_6_7_9_11  | 47.7353 | -355.236 | 0.6340145 | 0 | 0.20836914   | 0 | -0.014854422 |
| cov1_2_3_4_5_7_8_10_11 | 47.8276 | -355.282 | 0.6351776 | 0 | 0.2135996    | 0 | -0.013625102 |
| cov1_3_4_5_6_7_8_10_11 | 47.8321 | -355.284 | 0.6347771 | 0 | 0.20563693   | 0 | 0            |
| cov1_2_3_4_5_6_7_8_10  | 47.835  | -355.286 | 0.6359737 | 0 | 0.22033163   | 0 | -0.012665369 |
| cov1_2_3_4_5_6_9_10_11 | 47.8583 | -355.297 | 0.6322554 | 0 | 0.14196685   | 0 | -0.012234821 |
| cov3_4_5_6_7_8_9_10_11 | 47.8614 | -355.299 | 0.6320235 | 0 | 0            | 0 | 0            |
| cov2_3_4_5_6_7_8_9_10  | 47.8673 | -355.302 | 0.6329159 | 0 | 0            | 0 | 0.03680729   |
| cov2_3_4_5_7_8_9_10_11 | 47.9061 | -355.321 | 0.6304642 | 0 | 0            | 0 | 0.045968336  |
| cov2_3_4_5_6_7_8_9_11  | 47.9347 | -355.335 | 0.6327163 | 0 | 0            | 0 | 0.031680423  |
| cov1_2_3_4_5_6_8_10_11 | 47.9361 | -355.336 | 0.6351456 | 0 | 0.22372268   | 0 | -0.013696364 |
| cov2_3_4_5_6_8_9_10_11 | 47.977  | -355.357 | 0.6310851 | 0 | 0            | 0 | 0.034422324  |
| cov1_2_3_4_5_6_7_10_11 | 47.9813 | -355.359 | 0.635136  | 0 | 0.21956561   | 0 | -0.013498499 |
| cov2_3_4_5_6_7_9_10_11 | 48.0021 | -355.369 | 0.6310793 | 0 | 0            | 0 | 0.033280323  |
| cov2_3_4_5_6_7_8_10_11 | 48.2218 | -355.479 | 0.6339777 | 0 | 0            | 0 | 0.035726996  |
| cov1_2_3_4_5_6_7_8_11  | 49.2783 | -356.007 | 0.634291  | 0 | 0.32273601   | 0 | 0.004721612  |
| cov1_2_3_4_6_7_8_9_10  | 49.489  | -356.113 | 0.6374271 | 0 | -0.12124462  | 0 | 0.080069329  |
| cov1_2_3_4_7_8_9_10_11 | 49.5033 | -356.12  | 0.6372366 | 0 | -0.14426954  | 0 | 0.079178081  |
| cov1_2_3_4_6_7_8_9_11  | 49.5729 | -356.155 | 0.6384293 | 0 | -0.12234001  | 0 | 0.079171419  |
| cov1_2_3_4_6_7_9_10_11 | 49.634  | -356.185 | 0.6370468 | 0 | -0.11946518  | 0 | 0.079240599  |
| cov1_2_3_4_6_8_9_10_11 | 49.6546 | -356.195 | 0.6371828 | 0 | -0.11785818  | 0 | 0.08073949   |
| cov1_3_4_6_7_8_9_10_11 | 49.6661 | -356.201 | 0.6396161 | 0 | -0.097523008 | 0 | 0            |
| cov2_3_4_6_7_8_9_10_11 | 49.7303 | -356.233 | 0.6403472 | 0 | 0            | 0 | 0.056951114  |
| cov1_2_3_4_6_7_8_10_11 | 49.9118 | -356.324 | 0.6400712 | 0 | -0.11808156  | 0 | 0.082612403  |
| cov1_2_3_5_7_8_9_10_11 | 49.9308 | -356.334 | 0.6300781 | 0 | 0.019822127  | 0 | 0.18797112   |
| cov1_2_3_5_6_7_8_9_10  | 49.9314 | -356.334 | 0.630323  | 0 | 0.022238064  | 0 | 0.18814351   |

|                            |         |          |           |   |              |   |              |
|----------------------------|---------|----------|-----------|---|--------------|---|--------------|
| cov2_3_5_6_7_8_9_10_11     | 49.9348 | -356.336 | 0.6300041 | 0 | 0            | 0 | 0.19044654   |
| cov2_4_5_6_7_8_9_10_11     | 50.0212 | -356.379 | 0.6450159 | 0 | 0            | 0 | -0.045067354 |
| cov1_2_4_5_6_7_8_9_10      | 50.0213 | -356.379 | 0.6450563 | 0 | -0.001217181 | 0 | -0.044442895 |
| cov1_2_4_5_7_8_9_10_11     | 50.0294 | -356.383 | 0.6449682 | 0 | -0.015997756 | 0 | -0.045685209 |
| cov1_2_3_5_6_7_8_9_11      | 50.0368 | -356.387 | 0.6315625 | 0 | 0.020349865  | 0 | 0.18795412   |
| cov1_2_3_5_6_8_9_10_11     | 50.0646 | -356.4   | 0.6300645 | 0 | 0.029839921  | 0 | 0.188938     |
| cov1_4_5_6_7_8_9_10_11     | 50.0722 | -356.404 | 0.6435812 | 0 | -0.034479298 | 0 | 0            |
| cov1_2_3_5_6_7_9_10_11     | 50.0913 | -356.414 | 0.6300272 | 0 | 0.025182306  | 0 | 0.18838046   |
| cov1_2_4_5_6_7_9_10_11     | 50.146  | -356.441 | 0.644825  | 0 | 0.000983776  | 0 | -0.044138474 |
| cov1_2_4_5_6_7_8_9_11      | 50.1831 | -356.46  | 0.6471989 | 0 | -0.00494634  | 0 | -0.045448003 |
| cov1_2_3_6_7_8_9_10_11     | 50.2259 | -356.481 | 0.6333105 | 0 | -0.090226585 | 0 | 0.17720203   |
| cov1_2_4_5_6_8_9_10_11     | 50.231  | -356.484 | 0.6452679 | 0 | 0.005203323  | 0 | -0.045353034 |
| cov1_2_3_5_6_7_8_10_11     | 50.2948 | -356.516 | 0.6327216 | 0 | 0.031324407  | 0 | 0.18990009   |
| cov1_2_4_5_6_7_8_10_11     | 50.4649 | -356.601 | 0.6483741 | 0 | 0.00572454   | 0 | -0.044197866 |
| cov1_2_4_6_7_8_9_10_11     | 50.6053 | -356.671 | 0.6441373 | 0 | -0.14727607  | 0 | 0.019451644  |
| cov1_3_5_6_7_8_9_10_11     | 51.4242 | -357.08  | 0.635315  | 0 | 0.11651099   | 0 | 0            |
| cov1_2_5_6_7_8_9_10_11     | 52.6686 | -357.702 | 0.6419251 | 0 | -0.1948079   | 0 | 0.16311937   |
| cov1_2_3_4_5_7_8_9_10_11   | 54.2724 | -355.107 | 0.6324996 | 0 | 0.20150957   | 0 | -0.014734677 |
| cov1_3_4_5_6_7_8_9_10_11   | 54.2775 | -355.11  | 0.6320577 | 0 | 0.1937485    | 0 | 0            |
| cov1_2_3_4_5_6_7_8_9_10    | 54.2776 | -355.11  | 0.6331776 | 0 | 0.20832308   | 0 | -0.013830689 |
| cov1_2_3_4_5_6_7_8_9_11    | 54.376  | -355.159 | 0.6340439 | 0 | 0.20349285   | 0 | -0.014892645 |
| cov1_2_3_4_5_6_8_9_10_11   | 54.3824 | -355.162 | 0.6324753 | 0 | 0.21262449   | 0 | -0.014740525 |
| cov1_2_3_4_5_6_7_9_10_11   | 54.4258 | -355.184 | 0.6324528 | 0 | 0.20837945   | 0 | -0.014539502 |
| cov1_2_3_4_5_6_7_8_10_11   | 54.6221 | -355.282 | 0.6351682 | 0 | 0.21469552   | 0 | -0.01353588  |
| cov2_3_4_5_6_7_8_9_10_11   | 54.6256 | -355.284 | 0.631141  | 0 | 0            | 0 | 0.032028398  |
| cov1_2_3_4_6_7_8_9_10_11   | 56.2825 | -356.112 | 0.6370969 | 0 | -0.12353203  | 0 | 0.079821202  |
| cov1_2_3_5_6_7_8_9_10_11   | 56.7254 | -356.334 | 0.630069  | 0 | 0.020483256  | 0 | 0.18802976   |
| cov1_2_4_5_6_7_8_9_10_11   | 56.8158 | -356.379 | 0.6449702 | 0 | -0.00187449  | 0 | -0.04454872  |
| cov1_2_3_4_5_6_7_8_9_10_11 | 61.0668 | -355.107 | 0.6324831 | 0 | 0.20350973   | 0 | -0.014576554 |

| SE | bsnp_rs7817754 | SE | bsnp_rs2047962 | SE | bsnp_rs6469668 | SE | bsnp_rs6469667 | SE | bsnp_rs7832958 |
|----|----------------|----|----------------|----|----------------|----|----------------|----|----------------|
| 0  | 0              | 0  | 0              | 0  | 0              | 0  | 0              | 0  | 0              |
| 0  | 0              | 0  | 0.1605498      | 0  | 0              | 0  | 0              | 0  | 0              |
| 0  | 0              | 0  | 0              | 0  | 0              | 0  | 0              | 0  | -0.26492087    |
| 0  | -0.19722774    | 0  | 0              | 0  | 0              | 0  | 0              | 0  | 0              |
| 0  | 0              | 0  | 0              | 0  | 0              | 0  | 0              | 0  | 0              |
| 0  | 0              | 0  | 0              | 0  | 0              | 0  | 0              | 0  | 0              |
| 0  | 0              | 0  | 0              | 0  | 0              | 0  | 0              | 0  | 0              |
| 0  | 0              | 0  | 0              | 0  | 0              | 0  | 0              | 0  | 0              |
| 0  | -0.26790192    | 0  | 0              | 0  | 0              | 0  | 0              | 0  | 0              |
| 0  | -0.266837      | 0  | 0              | 0  | 0              | 0  | 0              | 0  | 0              |
| 0  | 0              | 0  | 0              | 0  | 0              | 0  | 0.092541539    | 0  | 0              |
| 0  | 0              | 0  | 0              | 0  | 0              | 0  | 0              | 0  | 0              |
| 0  | 0              | 0  | 0              | 0  | 0.076118222    | 0  | 0              | 0  | 0              |
| 0  | -0.22962797    | 0  | 0              | 0  | 0              | 0  | 0              | 0  | 0              |
| 0  | 0              | 0  | 0              | 0  | 0              | 0  | 0              | 0  | 0              |
| 0  | 0              | 0  | 0.14702117     | 0  | 0              | 0  | 0              | 0  | -0.23807745    |
| 0  | 0              | 0  | 0.14742472     | 0  | 0              | 0  | 0              | 0  | 0              |
| 0  | 0              | 0  | 0.39579418     | 0  | -0.26599209    | 0  | 0              | 0  | 0              |
| 0  | -0.16764464    | 0  | 0.14050612     | 0  | 0              | 0  | 0              | 0  | 0              |
| 0  | 0              | 0  | 0              | 0  | 0              | 0  | 0              | 0  | -0.25331183    |
| 0  | 0              | 0  | 0              | 0  | 0              | 0  | 0              | 0  | 0              |
| 0  | 0              | 0  | 0              | 0  | 0              | 0  | 0              | 0  | -0.25778657    |
| 0  | 0              | 0  | 0.14179356     | 0  | 0              | 0  | 0              | 0  | 0              |
| 0  | 0              | 0  | 0              | 0  | 0              | 0  | 0              | 0  | 0              |
| 0  | 0              | 0  | 0              | 0  | 0              | 0  | 0              | 0  | -0.25426799    |
| 0  | 0              | 0  | 0.14444295     | 0  | 0              | 0  | 0              | 0  | 0              |
| 0  | 0              | 0  | 0              | 0  | 0              | 0  | 0              | 0  | 0              |
| 0  | -0.2227934     | 0  | 0              | 0  | 0              | 0  | 0              | 0  | 0              |
| 0  | -0.21971385    | 0  | 0              | 0  | 0              | 0  | 0.11701076     | 0  | 0              |
| 0  | 0              | 0  | 0              | 0  | 0              | 0  | 0              | 0  | -0.25942765    |
| 0  | 0              | 0  | 0              | 0  | 0              | 0  | 0.086607661    | 0  | -0.25781237    |
| 0  | -0.22703969    | 0  | 0              | 0  | 0              | 0  | 0              | 0  | 0              |
| 0  | 0              | 0  | 0              | 0  | 0              | 0  | 0              | 0  | 0              |
| 0  | 0              | 0  | 0              | 0  | 0              | 0  | 0.08624908     | 0  | 0              |
| 0  | 0              | 0  | 0              | 0  | 0.07724819     | 0  | 0              | 0  | -0.26493758    |
| 0  | 0              | 0  | 0.19604188     | 0  | 0              | 0  | 0              | 0  | 0              |
| 0  | 0              | 0  | 0              | 0  | 0.077334473    | 0  | 0              | 0  | 0              |
| 0  | 0              | 0  | 0.2039757      | 0  | 0              | 0  | 0              | 0  | 0              |
| 0  | 0              | 0  | 0              | 0  | 0              | 0  | 0              | 0  | -0.28222212    |
| 0  | -0.11753947    | 0  | 0              | 0  | 0              | 0  | 0              | 0  | -0.15877921    |
| 0  | -0.12199552    | 0  | 0              | 0  | 0              | 0  | 0              | 0  | 0              |
| 0  | -0.18925013    | 0  | 0              | 0  | 0.063398271    | 0  | 0              | 0  | 0              |
| 0  | 0              | 0  | 0.18872487     | 0  | 0              | 0  | -0.039565673   | 0  | 0              |
| 0  | 0              | 0  | 0              | 0  | 0              | 0  | 0              | 0  | 0              |
| 0  | 0              | 0  | 0.15588512     | 0  | 0              | 0  | 0              | 0  | 0              |

|   |             |   |            |   |              |   |              |   |              |
|---|-------------|---|------------|---|--------------|---|--------------|---|--------------|
| 0 | 0           | 0 | 0          | 0 | 0            | 0 | 0            | 0 | 0            |
| 0 | -0.2383023  | 0 | 0.10540645 | 0 | 0            | 0 | 0            | 0 | 0            |
| 0 | 0           | 0 | 0          | 0 | 0            | 0 | 0            | 0 | 0            |
| 0 | 0           | 0 | 0          | 0 | 0            | 0 | 0            | 0 | -0.6273492   |
| 0 | -0.23650083 | 0 | 0.10898804 | 0 | 0            | 0 | 0            | 0 | 0            |
| 0 | 0           | 0 | 0          | 0 | 0.055400239  | 0 | 0            | 0 | 0            |
| 0 | -0.27292914 | 0 | 0          | 0 | 0            | 0 | 0            | 0 | 0            |
| 0 | 0           | 0 | 0          | 0 | 0            | 0 | 0            | 0 | 0            |
| 0 | 0           | 0 | 0          | 0 | 0            | 0 | 0            | 0 | 0            |
| 0 | 0           | 0 | 0          | 0 | 0            | 0 | 0.039515821  | 0 | 0            |
| 0 | -0.27222972 | 0 | 0          | 0 | 0            | 0 | 0            | 0 | 0            |
| 0 | 0           | 0 | 0          | 0 | 0.058645157  | 0 | 0            | 0 | 0            |
| 0 | 0           | 0 | 0          | 0 | 0            | 0 | 0            | 0 | 0            |
| 0 | 0           | 0 | 0          | 0 | 0            | 0 | 0            | 0 | 0            |
| 0 | 0           | 0 | 0          | 0 | 0            | 0 | 0            | 0 | 0            |
| 0 | 0           | 0 | 0          | 0 | 0            | 0 | 0.045369012  | 0 | 0            |
| 0 | 0           | 0 | 0          | 0 | 0            | 0 | 0            | 0 | 0            |
| 0 | 0           | 0 | 0          | 0 | -0.046330714 | 0 | 0            | 0 | 0            |
| 0 | 0           | 0 | 0          | 0 | 0            | 0 | -0.037177561 | 0 | 0            |
| 0 | 0           | 0 | 0          | 0 | 0            | 0 | 0            | 0 | 0            |
| 0 | -0.2704059  | 0 | 0          | 0 | 0            | 0 | 0            | 0 | 0            |
| 0 | -0.26907949 | 0 | 0          | 0 | 0            | 0 | 0.045152019  | 0 | 0            |
| 0 | -0.27697784 | 0 | 0          | 0 | 0            | 0 | 0            | 0 | 0            |
| 0 | -0.26231189 | 0 | 0          | 0 | 0.030141877  | 0 | 0            | 0 | 0            |
| 0 | -0.265821   | 0 | 0          | 0 | 0            | 0 | 0            | 0 | 0            |
| 0 | -0.26100579 | 0 | 0          | 0 | 0            | 0 | 0            | 0 | -0.012204343 |
| 0 | -0.26574776 | 0 | 0          | 0 | 0            | 0 | 0            | 0 | 0            |
| 0 | -0.26972288 | 0 | 0          | 0 | 0            | 0 | 0            | 0 | 0            |
| 0 | -0.26820219 | 0 | 0          | 0 | 0            | 0 | 0.051057686  | 0 | 0            |
| 0 | 0           | 0 | 0.38302198 | 0 | -0.27385034  | 0 | 0            | 0 | 0            |
| 0 | -0.27710305 | 0 | 0          | 0 | 0            | 0 | 0            | 0 | 0            |
| 0 | -0.15270238 | 0 | 0.35783227 | 0 | -0.24365075  | 0 | 0            | 0 | 0            |
| 0 | 0           | 0 | 0.1291841  | 0 | 0            | 0 | 0            | 0 | -0.23143446  |
| 0 | -0.26059283 | 0 | 0          | 0 | 0.034236325  | 0 | 0            | 0 | 0            |
| 0 | 0           | 0 | 0.34398009 | 0 | -0.22036686  | 0 | 0            | 0 | -0.20194794  |
| 0 | 0           | 0 | 0.12962314 | 0 | 0            | 0 | 0            | 0 | 0            |
| 0 | -0.26837481 | 0 | 0          | 0 | -0.13947555  | 0 | 0            | 0 | 0            |
| 0 | 0           | 0 | 0.38372363 | 0 | -0.27139076  | 0 | 0            | 0 | 0            |
| 0 | 0           | 0 | 0.34539772 | 0 | -0.22153349  | 0 | 0            | 0 | 0            |
| 0 | -0.2576239  | 0 | 0          | 0 | 0            | 0 | 0            | 0 | -0.016252477 |
| 0 | -0.26242437 | 0 | 0          | 0 | 0            | 0 | 0            | 0 | 0            |
| 0 | 0           | 0 | 0.13176262 | 0 | 0            | 0 | 0            | 0 | -0.2317221   |
| 0 | 0           | 0 | 0.13220063 | 0 | 0            | 0 | 0            | 0 | 0            |
| 0 | 0           | 0 | 0          | 0 | 0            | 0 | 0            | 0 | 0            |
| 0 | 0           | 0 | 0          | 0 | 0            | 0 | 0.13023119   | 0 | 0            |
| 0 | 0           | 0 | 0          | 0 | 0            | 0 | 0.055187398  | 0 | 0            |
| 0 | 0           | 0 | 0          | 0 | 0.005047628  | 0 | 0.088452253  | 0 | 0            |

|   |              |   |             |              |             |              |              |
|---|--------------|---|-------------|--------------|-------------|--------------|--------------|
| 0 | 0            | 0 | 0           | -0.010604302 | 0           | 0            | 0            |
| 0 | 0            | 0 | 0.27147802  | 0            | 0           | 0            | 0            |
| 0 | 0            | 0 | 0           | 0.08396188   | 0           | 0            | 0            |
| 0 | -0.18109685  | 0 | 0           | 0            | 0           | 0            | -0.092442385 |
| 0 | -0.18536163  | 0 | 0           | 0            | 0           | 0            | 0            |
| 0 | 0            | 0 | 0.26922522  | 0            | 0           | 0            | 0            |
| 0 | -0.22756772  | 0 | 0           | 0            | 0           | 0            | 0            |
| 0 | -0.22331055  | 0 | 0           | 0            | 0           | 0            | 0            |
| 0 | -0.22888019  | 0 | 0           | 0            | 0           | -0.027308301 | 0            |
| 0 | 0            | 0 | 0.24181253  | 0            | 0           | -0.15076878  | 0            |
| 0 | -0.22116801  | 0 | 0.022419718 | 0            | 0           | 0            | 0            |
| 0 | 0            | 0 | 0.20032214  | 0            | 0           | 0            | 0            |
| 0 | -0.0865851   | 0 | 0.14105243  | 0            | 0           | 0            | -0.16103974  |
| 0 | 0            | 0 | 0.40175571  | 0            | -0.37388289 | 0            | 0            |
| 0 | 0            | 0 | 0           | 0            | 0           | 0            | -0.25170219  |
| 0 | -0.090930858 | 0 | 0.14107728  | 0            | 0           | 0            | 0            |
| 0 | 0            | 0 | 0           | 0            | 0           | 0            | 0            |
| 0 | 0            | 0 | 0.39430276  | 0            | -0.33199289 | 0            | 0.083760047  |
| 0 | 0            | 0 | 0.24060694  | 0            | 0           | -0.14394989  | 0            |
| 0 | 0            | 0 | 0.18106896  | 0            | 0           | 0            | -0.23477542  |
| 0 | -0.28509489  | 0 | 0           | 0            | -0.20254247 | 0            | 0            |
| 0 | 0            | 0 | 0           | 0            | 0           | 0            | -0.25238151  |
| 0 | 0            | 0 | 0.14706778  | 0            | 0           | 0            | -0.62714506  |
| 0 | 0            | 0 | 0.20159384  | 0            | 0           | 0            | 0            |
| 0 | 0            | 0 | 0.17014899  | 0            | 0           | -0.032288621 | 0            |
| 0 | 0            | 0 | 0.16167624  | 0            | 0           | 0            | -0.22889614  |
| 0 | 0            | 0 | 0.1817334   | 0            | 0           | 0            | 0            |
| 0 | 0            | 0 | 0.12554711  | 0            | 0           | 0            | -0.24049504  |
| 0 | 0            | 0 | 0           | 0            | 0           | 0            | 0            |
| 0 | 0            | 0 | 0.17131771  | 0            | 0           | -0.033383929 | 0            |
| 0 | 0            | 0 | 0.16268156  | 0            | 0           | 0            | 0            |
| 0 | 0            | 0 | 0.12649689  | 0            | 0           | 0            | 0            |
| 0 | 0            | 0 | 0.37072326  | 0            | -0.27373746 | 0            | 0            |
| 0 | 0            | 0 | 0           | 0            | 0.057610266 | 0            | -0.25415992  |
| 0 | 0            | 0 | 0.39642901  | 0            | -0.27055138 | 0            | 0            |
| 0 | 0            | 0 | 0           | 0            | 0.057704979 | 0            | 0            |
| 0 | -0.17847792  | 0 | 0.1175735   | 0            | 0           | 0.030539705  | 0            |
| 0 | 0            | 0 | 0.22931249  | 0            | 0           | 0            | 0            |
| 0 | -0.17754735  | 0 | 0.12017516  | 0            | 0           | 0            | 0            |
| 0 | -0.16754242  | 0 | 0.1406393   | 0            | 0           | 0            | 0            |
| 0 | 0            | 0 | 0           | 0            | 0.060683103 | 0            | -0.25502716  |
| 0 | 0            | 0 | 0           | 0            | 0           | 0            | -0.25356194  |
| 0 | 0            | 0 | 0           | 0            | 0           | 0            | -0.25246848  |
| 0 | 0            | 0 | 0           | 0            | 0           | 0.036099074  | -0.25182105  |
| 0 | 0            | 0 | 0           | 0            | 0.060778294 | 0            | 0            |
| 0 | 0            | 0 | 0           | 0            | 0           | 0            | -0.6286062   |
| 0 | 0            | 0 | 0           | 0            | 0           | 0            | 0            |





|   |             |   |             |   |              |   |              |   |              |
|---|-------------|---|-------------|---|--------------|---|--------------|---|--------------|
| 0 | 0           | 0 | 0           | 0 | 0.022832309  | 0 | 0.06769145   | 0 | 0            |
| 0 | 0           | 0 | 0.16031376  | 0 | 0            | 0 | 0            | 0 | 0            |
| 0 | 0           | 0 | 0           | 0 | 0.077283415  | 0 | 0            | 0 | -0.6273491   |
| 0 | 0           | 0 | 0           | 0 | 0            | 0 | 0.082640234  | 0 | 0            |
| 0 | 0           | 0 | 0           | 0 | 0            | 0 | 0            | 0 | 0            |
| 0 | -0.2461352  | 0 | 0.34934319  | 0 | -0.49250579  | 0 | 0            | 0 | 0            |
| 0 | 0           | 0 | 0           | 0 | 0.058717901  | 0 | 0            | 0 | -0.27203695  |
| 0 | 0           | 0 | 0.17321267  | 0 | 0            | 0 | 0            | 0 | 0            |
| 0 | 0           | 0 | 0.20258018  | 0 | 0            | 0 | 0            | 0 | 0            |
| 0 | 0           | 0 | 0.19345304  | 0 | 0            | 0 | 0.005948648  | 0 | 0            |
| 0 | 0           | 0 | 0           | 0 | 0.059527197  | 0 | 0            | 0 | 0            |
| 0 | 0           | 0 | 0           | 0 | 0            | 0 | 0            | 0 | 0            |
| 0 | 0           | 0 | 0           | 0 | 0            | 0 | 0            | 0 | -0.62863436  |
| 0 | 0           | 0 | 0           | 0 | 0            | 0 | 0            | 0 | 0            |
| 0 | -0.11834617 | 0 | 0           | 0 | 0            | 0 | 0            | 0 | -0.62736896  |
| 0 | -0.211286   | 0 | 0.18192326  | 0 | 0            | 0 | 0            | 0 | 0            |
| 0 | 0           | 0 | 0.20279454  | 0 | 0            | 0 | 0.026838941  | 0 | 0            |
| 0 | 0           | 0 | 0.16619123  | 0 | 0            | 0 | -0.064412848 | 0 | 0            |
| 0 | 0           | 0 | 0           | 0 | 0            | 0 | -0.070241075 | 0 | 0            |
| 0 | -0.21915768 | 0 | 0.16496656  | 0 | 0            | 0 | -0.085554146 | 0 | 0            |
| 0 | 0           | 0 | 0           | 0 | 0            | 0 | 0            | 0 | 0            |
| 0 | 0           | 0 | 0           | 0 | 0            | 0 | 0            | 0 | 0            |
| 0 | -0.29559962 | 0 | 0           | 0 | -0.10002642  | 0 | 0            | 0 | 0            |
| 0 | 0           | 0 | 0           | 0 | 0            | 0 | -0.066355341 | 0 | 0            |
| 0 | 0           | 0 | 0           | 0 | -0.01365703  | 0 | 0            | 0 | 0            |
| 0 | -0.21144728 | 0 | 0.18014626  | 0 | 0            | 0 | 0            | 0 | 0            |
| 0 | -0.22167992 | 0 | 0.12950474  | 0 | 0            | 0 | 0            | 0 | 0            |
| 0 | 0           | 0 | 0.33360948  | 0 | -0.22969357  | 0 | 0            | 0 | -0.19329936  |
| 0 | -0.21875027 | 0 | 0.16447941  | 0 | 0            | 0 | -0.079262695 | 0 | 0            |
| 0 | -0.2371199  | 0 | 0.10395628  | 0 | 0            | 0 | 0            | 0 | 0            |
| 0 | -0.27190072 | 0 | 0           | 0 | 0            | 0 | 0            | 0 | 0            |
| 0 | 0           | 0 | 0           | 0 | 0.098684094  | 0 | 0            | 0 | 0            |
| 0 | -0.21972694 | 0 | 0.10646001  | 0 | 0            | 0 | 0            | 0 | -0.032280222 |
| 0 | -0.22459232 | 0 | 0.10619568  | 0 | 0            | 0 | 0            | 0 | 0            |
| 0 | -0.24191368 | 0 | 0.094985849 | 0 | 0            | 0 | 0            | 0 | 0            |
| 0 | 0           | 0 | 0           | 0 | -0.015218083 | 0 | 0            | 0 | 0            |
| 0 | -0.29477543 | 0 | 0           | 0 | -0.10054357  | 0 | 0            | 0 | 0            |
| 0 | 0           | 0 | 0.33511346  | 0 | -0.23092847  | 0 | 0            | 0 | 0            |
| 0 | -0.27369876 | 0 | 0           | 0 | 0            | 0 | -0.07485717  | 0 | 0            |
| 0 | 0           | 0 | 0           | 0 | 0.12524036   | 0 | 0            | 0 | 0            |
| 0 | 0           | 0 | 0           | 0 | 0.05252724   | 0 | 0            | 0 | 0            |
| 0 | -0.22112092 | 0 | 0.13128904  | 0 | 0            | 0 | 0            | 0 | 0            |
| 0 | 0           | 0 | 0.33419714  | 0 | -0.22724945  | 0 | 0            | 0 | -0.19411232  |
| 0 | -0.20759877 | 0 | 0.34174196  | 0 | -0.37771489  | 0 | 0.18033195   | 0 | 0            |
| 0 | 0           | 0 | 0.33569499  | 0 | -0.22847845  | 0 | 0            | 0 | 0            |
| 0 | -0.27122017 | 0 | 0           | 0 | 0            | 0 | 0            | 0 | 0            |
| 0 | -0.21564421 | 0 | 0.11010739  | 0 | 0            | 0 | 0            | 0 | -0.036157261 |

|   |             |   |             |   |              |   |              |   |              |
|---|-------------|---|-------------|---|--------------|---|--------------|---|--------------|
| 0 | -0.26604629 | 0 | 0           | 0 | 0            | 0 | 0            | 0 | 0            |
| 0 | -0.22055528 | 0 | 0.10985706  | 0 | 0            | 0 | 0            | 0 | 0            |
| 0 | -0.27108102 | 0 | 0           | 0 | 0            | 0 | 0            | 0 | 0            |
| 0 | -0.24195219 | 0 | 0.093210739 | 0 | 0            | 0 | 0            | 0 | 0            |
| 0 | 0           | 0 | 0           | 0 | 0.084612684  | 0 | -0.038504144 | 0 | 0            |
| 0 | 0           | 0 | 0           | 0 | 0.099791839  | 0 | 0            | 0 | 0            |
| 0 | -0.27882096 | 0 | 0           | 0 | 0            | 0 | 0            | 0 | 0            |
| 0 | 0           | 0 | 0.24576871  | 0 | 0            | 0 | 0            | 0 | -0.21544083  |
| 0 | -0.27297344 | 0 | 0           | 0 | 0            | 0 | -0.070977293 | 0 | 0            |
| 0 | -0.27424307 | 0 | 0           | 0 | 0            | 0 | 0            | 0 | 0.002304578  |
| 0 | 0           | 0 | 0           | 0 | 0            | 0 | 0            | 0 | 0            |
| 0 | 0           | 0 | 0           | 0 | 0            | 0 | 0.037670668  | 0 | 0            |
| 0 | 0           | 0 | 0           | 0 | 0            | 0 | 0            | 0 | 0            |
| 0 | 0           | 0 | 0           | 0 | 0            | 0 | 0.076872241  | 0 | 0            |
| 0 | 0           | 0 | 0.24651361  | 0 | 0            | 0 | 0            | 0 | 0            |
| 0 | 0           | 0 | 0           | 0 | 0.11696489   | 0 | 0            | 0 | 0            |
| 0 | -0.26565409 | 0 | 0           | 0 | 0            | 0 | 0            | 0 | 0            |
| 0 | 0           | 0 | 0           | 0 | -0.01927034  | 0 | 0            | 0 | 0            |
| 0 | 0           | 0 | 0           | 0 | 0            | 0 | 0            | 0 | 0            |
| 0 | 0           | 0 | 0           | 0 | 0            | 0 | 0.007551518  | 0 | 0            |
| 0 | 0           | 0 | 0           | 0 | 0            | 0 | 0            | 0 | 0            |
| 0 | 0           | 0 | 0           | 0 | 0.080889549  | 0 | -0.029154356 | 0 | 0            |
| 0 | -0.21582088 | 0 | 0.23596367  | 0 | -0.26644212  | 0 | 0            | 0 | 0            |
| 0 | 0           | 0 | 0           | 0 | 0            | 0 | 0.025630507  | 0 | 0            |
| 0 | -0.27668547 | 0 | 0           | 0 | 0            | 0 | 0            | 0 | 0            |
| 0 | -0.2720573  | 0 | 0           | 0 | 0            | 0 | 0            | 0 | -0.000302901 |
| 0 | 0           | 0 | 0.22108828  | 0 | 0            | 0 | -0.1375574   | 0 | -0.22171348  |
| 0 | 0           | 0 | 0           | 0 | 0            | 0 | 0            | 0 | 0            |
| 0 | 0           | 0 | 0.24339523  | 0 | 0            | 0 | 0            | 0 | -0.21659206  |
| 0 | 0           | 0 | 0           | 0 | 0            | 0 | 0.082203885  | 0 | 0            |
| 0 | 0           | 0 | 0.22228168  | 0 | 0            | 0 | -0.13879338  | 0 | 0            |
| 0 | 0           | 0 | 0.24413705  | 0 | 0            | 0 | 0            | 0 | 0            |
| 0 | 0           | 0 | 0           | 0 | 0            | 0 | 0.027188341  | 0 | 0            |
| 0 | 0           | 0 | 0           | 0 | -0.017410037 | 0 | 0            | 0 | 0            |
| 0 | 0           | 0 | 0           | 0 | 0            | 0 | 0.027778978  | 0 | 0            |
| 0 | 0           | 0 | 0           | 0 | -0.040226461 | 0 | -0.013377498 | 0 | 0            |
| 0 | 0           | 0 | 0.21977501  | 0 | 0            | 0 | -0.13084182  | 0 | -0.2225154   |
| 0 | 0           | 0 | 0.22098739  | 0 | 0            | 0 | -0.13208861  | 0 | 0            |
| 0 | -0.2857476  | 0 | 0           | 0 | -0.065133739 | 0 | 0            | 0 | 0            |
| 0 | -0.2684165  | 0 | 0           | 0 | 0            | 0 | 0            | 0 | 0            |
| 0 | -0.26709553 | 0 | 0           | 0 | 0            | 0 | 0.043762343  | 0 | 0            |
| 0 | -0.18961773 | 0 | 0.35815554  | 0 | -0.30367218  | 0 | 0            | 0 | 0            |
| 0 | -0.27204481 | 0 | 0           | 0 | 0            | 0 | 0            | 0 | 0            |
| 0 | -0.26767508 | 0 | 0           | 0 | 0            | 0 | 0            | 0 | -0.004807134 |
| 0 | -0.27031602 | 0 | 0           | 0 | 0            | 0 | 0.004284922  | 0 | 0            |
| 0 | -0.2723321  | 0 | 0           | 0 | 0            | 0 | 0            | 0 | 0            |
| 0 | -0.27459394 | 0 | 0           | 0 | 0            | 0 | 0            | 0 | 0            |

|   |              |   |            |   |              |             |              |              |
|---|--------------|---|------------|---|--------------|-------------|--------------|--------------|
| 0 | 0            | 0 | 0.16865206 | 0 | 0            | 0           | 0            | -0.20359849  |
| 0 | -0.27246384  | 0 | 0          | 0 | 0            | 0.033767312 | 0            | 0            |
| 0 | -0.27260419  | 0 | 0          | 0 | -0.016835692 | 0           | 0.060729691  | 0            |
| 0 | -0.26573987  | 0 | 0          | 0 | 0            | 0           | 0.044990349  | -0.005895063 |
| 0 | -0.27069491  | 0 | 0          | 0 | 0            | 0           | 0.045233999  | 0            |
| 0 | -0.2607678   | 0 | 0          | 0 | 0.028125695  | 0           | 0            | 0            |
| 0 | -0.2669658   | 0 | 0          | 0 | 0            | 0           | 0            | -0.017846411 |
| 0 | -0.27377798  | 0 | 0          | 0 | 0.008828416  | 0           | 0            | 0            |
| 0 | -0.27171266  | 0 | 0          | 0 | 0            | 0           | 0            | 0            |
| 0 | 0            | 0 | 0.16969736 | 0 | 0            | 0           | 0            | 0            |
| 0 | -0.26208321  | 0 | 0          | 0 | 0            | 0           | 0            | -0.62666725  |
| 0 | -0.095613065 | 0 | 0.34227816 | 0 | -0.22581521  | 0           | 0            | -0.11608725  |
| 0 | -0.24816995  | 0 | 0          | 0 | 0.031690953  | 0           | 0            | -0.024491706 |
| 0 | -0.25318212  | 0 | 0          | 0 | 0.031149352  | 0           | 0            | 0            |
| 0 | 0            | 0 | 0.42899662 | 0 | -0.26044316  | 0           | 0            | 0            |
| 0 | -0.25630374  | 0 | 0          | 0 | 0            | 0           | 0            | -0.016787422 |
| 0 | 0            | 0 | 0.35093232 | 0 | -0.31438574  | 0           | 0            | -0.19415679  |
| 0 | -0.26109603  | 0 | 0          | 0 | 0            | 0           | 0            | 0            |
| 0 | -0.28676813  | 0 | 0          | 0 | -0.073019873 | 0           | 0            | 0            |
| 0 | -0.09968874  | 0 | 0.34339105 | 0 | -0.22704906  | 0           | 0            | 0            |
| 0 | 0            | 0 | 0.19433773 | 0 | 0            | 0           | 0            | -0.22189828  |
| 0 | 0            | 0 | 0.38325195 | 0 | -0.27688653  | 0           | 0            | 0            |
| 0 | 0            | 0 | 0.37715065 | 0 | -0.23981005  | 0           | 0            | 0            |
| 0 | -0.29435274  | 0 | 0          | 0 | -0.21675183  | 0           | 0            | 0            |
| 0 | 0            | 0 | 0.35237654 | 0 | -0.31585534  | 0           | 0            | 0            |
| 0 | 0            | 0 | 0.16955882 | 0 | 0            | 0           | 0            | -0.2053087   |
| 0 | 0            | 0 | 0.19538417 | 0 | 0            | 0           | 0            | 0            |
| 0 | -0.2714644   | 0 | 0          | 0 | 0            | 0           | 0            | 0            |
| 0 | -0.26545255  | 0 | 0          | 0 | 0            | 0           | 0            | -0.007492525 |
| 0 | 0            | 0 | 0.34429541 | 0 | -0.27685334  | 0           | 0.069838403  | -0.19610446  |
| 0 | -0.26959806  | 0 | 0          | 0 | 0            | 0           | 0.006025319  | 0            |
| 0 | -0.27015085  | 0 | 0          | 0 | 0            | 0           | 0            | 0            |
| 0 | -0.27186476  | 0 | 0          | 0 | 0            | 0           | 0.038825938  | 0            |
| 0 | -0.2722095   | 0 | 0          | 0 | -0.019379482 | 0           | 0.068973581  | 0            |
| 0 | 0            | 0 | 0.17060519 | 0 | 0            | 0           | 0            | 0            |
| 0 | -0.26321538  | 0 | 0          | 0 | 0            | 0           | 0.050809255  | -0.008772185 |
| 0 | 0            | 0 | 0.38247776 | 0 | -0.24905853  | 0           | -0.032074129 | 0            |
| 0 | -0.26825147  | 0 | 0          | 0 | 0            | 0           | 0.051060331  | 0            |
| 0 | 0            | 0 | 0.3798144  | 0 | -0.23958494  | 0           | 0            | 0            |
| 0 | 0            | 0 | 0.12689689 | 0 | 0            | 0           | 0            | -0.23200245  |
| 0 | 0            | 0 | 0.12918949 | 0 | 0            | 0           | 0            | -0.62729647  |
| 0 | -0.2814726   | 0 | 0          | 0 | -0.17972375  | 0           | 0.079675326  | 0            |
| 0 | 0            | 0 | 0.34583621 | 0 | -0.27747358  | 0           | 0.069032224  | 0            |
| 0 | 0            | 0 | 0.31013897 | 0 | -0.22961886  | 0           | 0            | -0.20525915  |
| 0 | -0.2646524   | 0 | 0          | 0 | 0            | 0           | 0            | -0.022158942 |
| 0 | -0.27332529  | 0 | 0          | 0 | 0.010539308  | 0           | 0            | 0            |
| 0 | -0.26946057  | 0 | 0          | 0 | 0            | 0           | 0            | 0            |

|   |             |   |             |   |              |   |              |              |
|---|-------------|---|-------------|---|--------------|---|--------------|--------------|
| 0 | 0           | 0 | 0.19180479  | 0 | 0            | 0 | 0            | -0.22297861  |
| 0 | 0           | 0 | 0.42512476  | 0 | -0.25903226  | 0 | 0            | 0            |
| 0 | 0           | 0 | 0.34434217  | 0 | -0.22064473  | 0 | 0            | -0.62705089  |
| 0 | 0           | 0 | 0.34551059  | 0 | -0.24476576  | 0 | 0            | -0.21064363  |
| 0 | 0           | 0 | 0.12733807  | 0 | 0            | 0 | 0            | 0            |
| 0 | -0.2432765  | 0 | 0           | 0 | 0.036065791  | 0 | 0            | -0.029911388 |
| 0 | -0.2483495  | 0 | 0           | 0 | 0.035539496  | 0 | 0            | 0            |
| 0 | 0           | 0 | 0.37838157  | 0 | -0.23995238  | 0 | 0            | 0            |
| 0 | 0           | 0 | 0.31190778  | 0 | -0.23071719  | 0 | 0            | 0            |
| 0 | -0.25874095 | 0 | 0           | 0 | 0            | 0 | 0            | -0.62667787  |
| 0 | 0           | 0 | 0.1928509   | 0 | 0            | 0 | 0            | 0            |
| 0 | 0           | 0 | 0.34691843  | 0 | -0.24530279  | 0 | 0            | 0            |
| 0 | -0.27812821 | 0 | 0           | 0 | -0.15348355  | 0 | 0            | 0            |
| 0 | 0           | 0 | 0.13176825  | 0 | 0            | 0 | 0            | -0.62728691  |
| 0 | -0.25953759 | 0 | 0           | 0 | -0.13585209  | 0 | 0            | -0.014861041 |
| 0 | -0.26451176 | 0 | 0           | 0 | -0.13788566  | 0 | 0            | 0            |
| 0 | 0           | 0 | 0.38332888  | 0 | -0.25362041  | 0 | -0.022847161 | 0            |
| 0 | 0           | 0 | 0.38172153  | 0 | -0.24988876  | 0 | 0            | 0            |
| 0 | 0           | 0 | 0           | 0 | 0            | 0 | 0.067117222  | 0            |
| 0 | 0           | 0 | 0           | 0 | -0.009226999 | 0 | 0            | 0            |
| 0 | 0           | 0 | 0           | 0 | 0.016746791  | 0 | 0.11870062   | 0            |
| 0 | 0           | 0 | 0           | 0 | -0.011937949 | 0 | 0.055688376  | 0            |
| 0 | 0           | 0 | 0.2700389   | 0 | 0            | 0 | 0            | 0            |
| 0 | 0           | 0 | 0.26931176  | 0 | 0            | 0 | 0            | 0            |
| 0 | 0           | 0 | 0.27340984  | 0 | 0            | 0 | -0.028136524 | 0            |
| 0 | 0           | 0 | 0.27464671  | 0 | 0            | 0 | 0            | 0            |
| 0 | 0           | 0 | 0.24714898  | 0 | 0            | 0 | -0.10357408  | 0            |
| 0 | -0.17615387 | 0 | 0           | 0 | 0            | 0 | 0            | -0.097648589 |
| 0 | -0.18190199 | 0 | 0           | 0 | 0            | 0 | 0            | -0.62681268  |
| 0 | -0.18051886 | 0 | 0           | 0 | 0            | 0 | 0            | 0            |
| 0 | -0.15143971 | 0 | 0.050771667 | 0 | 0            | 0 | 0            | -0.11266586  |
| 0 | 0           | 0 | 0.26775535  | 0 | 0            | 0 | 0            | 0            |
| 0 | 0           | 0 | 0           | 0 | 0            | 0 | 0            | -0.2523184   |
| 0 | -0.1782779  | 0 | 0           | 0 | 0            | 0 | -0.032691979 | -0.096093807 |
| 0 | -0.15706268 | 0 | 0.048615606 | 0 | 0            | 0 | 0            | 0            |
| 0 | -0.17866534 | 0 | 0           | 0 | 0            | 0 | 0            | -0.087405622 |
| 0 | -0.18239836 | 0 | 0           | 0 | 0            | 0 | -0.032686848 | 0            |
| 0 | -0.18282604 | 0 | 0           | 0 | 0            | 0 | 0            | 0            |
| 0 | 0           | 0 | 0           | 0 | 0            | 0 | 0            | 0            |
| 0 | 0           | 0 | 0.27101409  | 0 | 0            | 0 | -0.025800516 | 0            |
| 0 | -0.21331122 | 0 | 0.036827875 | 0 | 0            | 0 | 0            | 0            |
| 0 | 0           | 0 | 0.27080235  | 0 | 0            | 0 | 0            | 0            |
| 0 | 0           | 0 | 0           | 0 | 0            | 0 | -0.076716941 | -0.25365378  |
| 0 | 0           | 0 | 0.23949073  | 0 | 0            | 0 | -0.15028987  | 0            |
| 0 | -0.22478517 | 0 | 0           | 0 | 0            | 0 | 0            | 0            |
| 0 | -0.2274391  | 0 | 0           | 0 | 0            | 0 | 0.020215091  | 0            |
| 0 | -0.21109227 | 0 | 0.030374662 | 0 | 0            | 0 | 0            | 0            |

|   |              |   |             |   |              |   |              |   |             |
|---|--------------|---|-------------|---|--------------|---|--------------|---|-------------|
| 0 | 0            | 0 | 0.26430224  | 0 | 0            | 0 | -0.13416937  | 0 | 0           |
| 0 | -0.22393131  | 0 | 0           | 0 | 0            | 0 | -0.01316784  | 0 | 0           |
| 0 | 0            | 0 | 0           | 0 | 0            | 0 | 0            | 0 | -0.25304219 |
| 0 | -0.21750627  | 0 | 0.029724765 | 0 | 0            | 0 | -0.032587076 | 0 | 0           |
| 0 | 0            | 0 | 0.24581372  | 0 | 0            | 0 | -0.097402857 | 0 | 0           |
| 0 | 0            | 0 | 0.19842089  | 0 | 0            | 0 | 0            | 0 | 0           |
| 0 | 0            | 0 | 0.23874937  | 0 | 0            | 0 | 0            | 0 | 0           |
| 0 | 0            | 0 | 0           | 0 | 0            | 0 | 0            | 0 | -0.25194443 |
| 0 | 0            | 0 | 0           | 0 | 0            | 0 | -0.077903499 | 0 | 0           |
| 0 | 0            | 0 | 0.39866412  | 0 | -0.3700543   | 0 | 0            | 0 | 0           |
| 0 | 0            | 0 | 0.45040987  | 0 | -0.41590555  | 0 | 0            | 0 | 0           |
| 0 | -0.087481644 | 0 | 0.14097423  | 0 | 0            | 0 | 0            | 0 | -0.6270906  |
| 0 | 0            | 0 | 0.14285726  | 0 | 0            | 0 | 0            | 0 | -0.23960518 |
| 0 | 0            | 0 | 0           | 0 | 0            | 0 | 0            | 0 | -0.23870107 |
| 0 | 0            | 0 | 0           | 0 | 0            | 0 | 0            | 0 | -0.62857395 |
| 0 | 0            | 0 | 0           | 0 | 0            | 0 | 0            | 0 | 0           |
| 0 | 0            | 0 | 0           | 0 | 0            | 0 | -0.073004462 | 0 | -0.25428867 |
| 0 | 0            | 0 | 0           | 0 | 0            | 0 | 0            | 0 | 0           |
| 0 | 0            | 0 | 0.1438035   | 0 | 0            | 0 | 0            | 0 | 0           |
| 0 | -0.079111297 | 0 | 0.15060133  | 0 | 0            | 0 | 0            | 0 | -0.1668258  |
| 0 | -0.083978407 | 0 | 0.14414909  | 0 | 0            | 0 | 0            | 0 | -0.16153466 |
| 0 | -0.085923633 | 0 | 0.14188185  | 0 | 0            | 0 | -0.001097907 | 0 | -0.16156953 |
| 0 | 0            | 0 | 0.40082472  | 0 | -0.37336211  | 0 | 0.014625505  | 0 | 0           |
| 0 | 0            | 0 | 0           | 0 | 0            | 0 | 0            | 0 | 0           |
| 0 | 0            | 0 | 0           | 0 | -0.007386162 | 0 | 0            | 0 | -0.25148434 |
| 0 | -0.08479117  | 0 | 0.14896212  | 0 | 0            | 0 | 0            | 0 | 0           |
| 0 | -0.088413215 | 0 | 0.1440664   | 0 | 0            | 0 | 0            | 0 | 0           |
| 0 | -0.090919015 | 0 | 0.14109194  | 0 | 0            | 0 | -1.93E-05    | 0 | 0           |
| 0 | 0            | 0 | 0.13662419  | 0 | 0            | 0 | -0.068010208 | 0 | -0.24147733 |
| 0 | 0            | 0 | 0           | 0 | 0            | 0 | -0.074189798 | 0 | 0           |
| 0 | 0            | 0 | 0           | 0 | 0            | 0 | 0            | 0 | -0.23991821 |
| 0 | 0            | 0 | 0.18107334  | 0 | 0            | 0 | 0            | 0 | -0.62715993 |
| 0 | 0            | 0 | 0.3908574   | 0 | -0.32252731  | 0 | 0.10071584   | 0 | 0           |
| 0 | 0            | 0 | 0           | 0 | 0            | 0 | 0            | 0 | -0.62859717 |
| 0 | 0            | 0 | 0.26085579  | 0 | 0            | 0 | -0.12906346  | 0 | 0           |
| 0 | -0.28518016  | 0 | 0           | 0 | -0.20386733  | 0 | 0.055658773  | 0 | 0           |
| 0 | 0            | 0 | 0.23618843  | 0 | 0            | 0 | 0            | 0 | 0           |
| 0 | 0            | 0 | 0           | 0 | -0.007385082 | 0 | 0            | 0 | 0           |
| 0 | 0            | 0 | 0.16941186  | 0 | 0            | 0 | -0.031065388 | 0 | -0.62713314 |
| 0 | 0            | 0 | 0.40441678  | 0 | -0.33645372  | 0 | 0.093434359  | 0 | 0           |
| 0 | 0            | 0 | 0.12963984  | 0 | 0            | 0 | 0            | 0 | -0.22744141 |
| 0 | -0.31705258  | 0 | 0           | 0 | -0.22763323  | 0 | 0            | 0 | 0           |
| 0 | 0            | 0 | 0.13769338  | 0 | 0            | 0 | -0.069218871 | 0 | 0           |
| 0 | 0            | 0 | 0.16179699  | 0 | 0            | 0 | 0            | 0 | -0.62709496 |
| 0 | -0.31009537  | 0 | 0           | 0 | -0.22212886  | 0 | 0            | 0 | 0.035933819 |
| 0 | -0.28740379  | 0 | 0           | 0 | -0.20432067  | 0 | 0            | 0 | 0           |
| 0 | 0            | 0 | 0.18042504  | 0 | 0            | 0 | 0.01524073   | 0 | -0.23448618 |

|   |             |   |            |   |              |   |              |             |
|---|-------------|---|------------|---|--------------|---|--------------|-------------|
| 0 | 0           | 0 | 0.12550182 | 0 | 0            | 0 | 0            | -0.62721783 |
| 0 | 0           | 0 | 0.18107447 | 0 | 0            | 0 | 0            | -0.23408808 |
| 0 | 0           | 0 | 0          | 0 | 0            | 0 | 0            | 0           |
| 0 | 0           | 0 | 0          | 0 | -0.008994244 | 0 | 0            | -0.25212006 |
| 0 | 0           | 0 | 0          | 0 | 0.14190133   | 0 | 0            | -0.2577684  |
| 0 | 0           | 0 | 0.17139458 | 0 | 0            | 0 | -0.023354535 | -0.23220811 |
| 0 | 0           | 0 | 0.13065329 | 0 | 0            | 0 | 0            | 0           |
| 0 | 0           | 0 | 0.18124005 | 0 | 0            | 0 | 0.012291562  | 0           |
| 0 | 0           | 0 | 0.18175803 | 0 | 0            | 0 | 0            | 0           |
| 0 | 0           | 0 | 0          | 0 | 0.054705712  | 0 | 0            | -0.25433961 |
| 0 | 0           | 0 | 0          | 0 | -0.008996654 | 0 | 0            | 0           |
| 0 | 0           | 0 | 0.17262144 | 0 | 0            | 0 | -0.023940655 | 0           |
| 0 | 0           | 0 | 0          | 0 | 0.14158528   | 0 | 0            | 0           |
| 0 | 0           | 0 | 0          | 0 | 0.10139357   | 0 | -0.057574326 | -0.25724398 |
| 0 | 0           | 0 | 0          | 0 | 0.057865302  | 0 | 0            | -0.62858485 |
| 0 | 0           | 0 | 0          | 0 | 0.054800021  | 0 | 0            | 0           |
| 0 | 0           | 0 | 0          | 0 | 0.07328172   | 0 | 0            | -0.24723771 |
| 0 | 0           | 0 | 0.36641534 | 0 | -0.26750827  | 0 | 0            | 0           |
| 0 | 0           | 0 | 0          | 0 | 0.10269846   | 0 | -0.059169783 | 0           |
| 0 | 0           | 0 | 0.22619508 | 0 | 0            | 0 | 0            | 0           |
| 0 | 0           | 0 | 0          | 0 | 0.13381137   | 0 | 0            | -0.25820393 |
| 0 | 0           | 0 | 0          | 0 | 0.074127472  | 0 | 0            | 0           |
| 0 | -0.17358362 | 0 | 0.12084122 | 0 | 0            | 0 | 0.041311319  | 0           |
| 0 | 0           | 0 | 0          | 0 | 0            | 0 | 0            | -0.25275852 |
| 0 | 0           | 0 | 0          | 0 | 0            | 0 | 0.03421427   | -0.25214004 |
| 0 | -0.17797243 | 0 | 0.11853733 | 0 | 0            | 0 | 0.033904525  | 0           |
| 0 | 0           | 0 | 0          | 0 | 0.060952366  | 0 | 0            | -0.62869954 |
| 0 | -0.17404386 | 0 | 0.12136954 | 0 | 0            | 0 | 0            | 0           |
| 0 | 0           | 0 | 0          | 0 | 0            | 0 | 0            | -0.62852862 |
| 0 | 0           | 0 | 0          | 0 | 0.09776494   | 0 | -0.048486433 | -0.25765805 |
| 0 | 0           | 0 | 0          | 0 | 0.13349087   | 0 | 0            | 0           |
| 0 | 0           | 0 | 0          | 0 | 0            | 0 | 0            | -0.26068945 |
| 0 | 0           | 0 | 0          | 0 | 0            | 0 | 0            | -0.62858854 |
| 0 | 0           | 0 | 0          | 0 | 0            | 0 | 0.03707055   | -0.6287684  |
| 0 | 0           | 0 | 0          | 0 | 0.074010966  | 0 | 0            | -0.2492004  |
| 0 | 0           | 0 | 0          | 0 | 0            | 0 | 0            | 0           |
| 0 | 0           | 0 | 0          | 0 | 0            | 0 | 0.033805414  | 0           |
| 0 | 0           | 0 | 0          | 0 | 0.099079731  | 0 | -0.050085356 | 0           |
| 0 | 0           | 0 | 0          | 0 | 0            | 0 | 0            | -0.62865192 |
| 0 | 0           | 0 | 0          | 0 | 0            | 0 | 0            | -0.62745567 |
| 0 | 0           | 0 | 0          | 0 | 0            | 0 | 0            | 0           |
| 0 | 0           | 0 | 0          | 0 | 0            | 0 | 0.011556284  | -0.25222744 |
| 0 | 0           | 0 | 0          | 0 | 0            | 0 | 0            | -0.25264553 |
| 0 | 0           | 0 | 0          | 0 | 0.074860392  | 0 | 0            | 0           |
| 0 | 0           | 0 | 0          | 0 | 0            | 0 | 0.032480898  | -0.25337221 |
| 0 | 0           | 0 | 0          | 0 | 0            | 0 | 0            | -0.25594423 |
| 0 | 0           | 0 | 0          | 0 | 0            | 0 | 0.011768491  | -0.25845391 |

|   |             |   |            |   |              |   |              |              |
|---|-------------|---|------------|---|--------------|---|--------------|--------------|
| 0 | 0           | 0 | 0          | 0 | -0.000109105 | 0 | 0            | -0.25871208  |
| 0 | 0           | 0 | 0          | 0 | 0            | 0 | -0.044161442 | -0.62727631  |
| 0 | 0           | 0 | 0          | 0 | -0.038363359 | 0 | 0            | -0.62745046  |
| 0 | -0.24916298 | 0 | 0.32599778 | 0 | -0.35440531  | 0 | 0            | 0            |
| 0 | 0           | 0 | 0          | 0 | 0            | 0 | 0            | -0.62733253  |
| 0 | 0           | 0 | 0          | 0 | 0            | 0 | 0.008249092  | 0            |
| 0 | 0           | 0 | 0          | 0 | 0            | 0 | 0            | 0            |
| 0 | 0           | 0 | 0          | 0 | 0            | 0 | 0            | -0.62858493  |
| 0 | 0           | 0 | 0          | 0 | 0            | 0 | 0.042751086  | -0.62948806  |
| 0 | 0           | 0 | 0          | 0 | 0            | 0 | 0.032605862  | 0            |
| 0 | -0.21284224 | 0 | 0          | 0 | -0.083387797 | 0 | 0.18184973   | -0.057729718 |
| 0 | -0.25727932 | 0 | 0          | 0 | -0.11281478  | 0 | 0.18980604   | 0            |
| 0 | 0           | 0 | 0          | 0 | -0.028827552 | 0 | 0            | -0.24914104  |
| 0 | -0.22004699 | 0 | 0          | 0 | -0.086990619 | 0 | 0.18575837   | 0            |
| 0 | 0           | 0 | 0          | 0 | 0            | 0 | -0.033303923 | -0.2524931   |
| 0 | 0           | 0 | 0          | 0 | -0.023533461 | 0 | -0.031752975 | -0.25788619  |
| 0 | 0           | 0 | 0          | 0 | 0            | 0 | 0            | 0            |
| 0 | 0           | 0 | 0          | 0 | 0            | 0 | 0.008441823  | 0            |
| 0 | 0           | 0 | 0          | 0 | -0.000194028 | 0 | 0            | 0            |
| 0 | -0.16704068 | 0 | 0          | 0 | 0            | 0 | 0            | -0.62686569  |
| 0 | 0           | 0 | 0          | 0 | 0            | 0 | 0            | -0.6285804   |
| 0 | 0           | 0 | 0          | 0 | 0            | 0 | 0.01360888   | -0.2528993   |
| 0 | 0           | 0 | 0          | 0 | 0            | 0 | 0            | -0.25347348  |
| 0 | -0.16433449 | 0 | 0          | 0 | 0            | 0 | 0.10894471   | -0.62727802  |
| 0 | 0           | 0 | 0          | 0 | 0            | 0 | 0.037440059  | -0.25429259  |
| 0 | 0           | 0 | 0          | 0 | -0.028320082 | 0 | 0            | 0            |
| 0 | 0           | 0 | 0          | 0 | 0            | 0 | -0.034002992 | 0            |
| 0 | 0           | 0 | 0          | 0 | -0.02271207  | 0 | -0.033443685 | 0            |
| 0 | -0.16682704 | 0 | 0          | 0 | 0            | 0 | 0.044097331  | -0.10609388  |
| 0 | -0.22112612 | 0 | 0.322854   | 0 | -0.24597404  | 0 | 0            | 0            |
| 0 | -0.23661049 | 0 | 0.32379192 | 0 | -0.27035512  | 0 | 0            | 0            |
| 0 | -0.23212175 | 0 | 0.32100504 | 0 | -0.28297078  | 0 | 0.052450754  | 0            |
| 0 | -0.24990023 | 0 | 0.32766359 | 0 | -0.36391125  | 0 | 0            | 0            |
| 0 | -0.16633845 | 0 | 0          | 0 | 0            | 0 | 0            | -0.10854447  |
| 0 | -0.17142525 | 0 | 0          | 0 | 0            | 0 | 0.043189388  | 0            |
| 0 | -0.23536896 | 0 | 0.2909045  | 0 | -0.2498523   | 0 | 0            | 0            |
| 0 | 0           | 0 | 0          | 0 | 0            | 0 | 0.010300344  | 0            |
| 0 | 0           | 0 | 0          | 0 | 0            | 0 | 0            | 0            |
| 0 | 0           | 0 | 0          | 0 | 0            | 0 | 0.037570177  | 0            |
| 0 | -0.17067138 | 0 | 0          | 0 | 0            | 0 | 0            | 0            |
| 0 | -0.16389678 | 0 | 0          | 0 | 0            | 0 | 0.098170941  | -0.11209431  |
| 0 | -0.24040468 | 0 | 0.32558427 | 0 | -0.24823883  | 0 | 0            | 0            |
| 0 | -0.23587853 | 0 | 0.32477415 | 0 | -0.24703767  | 0 | 0            | 0.023176946  |
| 0 | -0.16875277 | 0 | 0          | 0 | 0            | 0 | 0.099233635  | 0            |
| 0 | -0.22018444 | 0 | 0          | 0 | 0            | 0 | 0.051125101  | 0            |
| 0 | -0.23157134 | 0 | 0.32208275 | 0 | -0.28659956  | 0 | 0.060624656  | 0            |
| 0 | -0.23589795 | 0 | 0.32514487 | 0 | -0.26994295  | 0 | 0            | 0            |



|   |             |   |            |   |             |              |             |              |
|---|-------------|---|------------|---|-------------|--------------|-------------|--------------|
| 0 | -0.23532805 | 0 | 0.28734763 | 0 | -0.24821823 | 0            | 0           | 0            |
| 0 | -0.23551796 | 0 | 0.32629927 | 0 | -0.24460315 | 0            | 0           | 0            |
| 0 | -0.230941   | 0 | 0.3254844  | 0 | -0.24339933 | 0            | 0           | 0.017801127  |
| 0 | -0.15091424 | 0 | 0          | 0 | 0           | 0            | 0           | -0.62710589  |
| 0 | -0.13945173 | 0 | 0          | 0 | 0.020501046 | 0            | 0           | -0.15688904  |
| 0 | -0.14435781 | 0 | 0          | 0 | 0.019727648 | 0            | 0           | 0            |
| 0 | -0.1020793  | 0 | 0          | 0 | 0.069959395 | 0            | 0           | -0.62723369  |
| 0 | 0           | 0 | 0          | 0 | 0           | 0.043475853  | 0           | -0.62836803  |
| 0 | -0.33540723 | 0 | 0.36482691 | 0 | -0.57704432 | 0            | 0           | 0            |
| 0 | 0           | 0 | 0          | 0 | 0.020355435 | 0            | 0.071179224 | -0.62884837  |
| 0 | 0           | 0 | 0          | 0 | 0.00704122  | 0            | 0           | -0.62741144  |
| 0 | 0           | 0 | 0          | 0 | 0           | 0            | 0           | -0.62735308  |
| 0 | 0           | 0 | 0          | 0 | 0           | 0.084499064  | 0           | -0.62888311  |
| 0 | -0.32944831 | 0 | 0.36381705 | 0 | -0.57129357 | 0            | 0           | 0.12220603   |
| 0 | 0           | 0 | 0          | 0 | 0           | 0            | 0           | 0            |
| 0 | 0           | 0 | 0          | 0 | 0.006278316 | 0            | 0.038830021 | -0.25882976  |
| 0 | 0           | 0 | 0          | 0 | 0           | 0.040122062  | 0           | -0.25699556  |
| 0 | 0           | 0 | 0          | 0 | 0.007357531 | 0            | 0           | -0.25926339  |
| 0 | 0           | 0 | 0          | 0 | 0.021314242 | 0            | 0.067612733 | -0.25991987  |
| 0 | 0           | 0 | 0          | 0 | 0.10732167  | 0            | 0           | 0            |
| 0 | 0           | 0 | 0.16938252 | 0 | 0           | 0            | 0           | 0            |
| 0 | 0           | 0 | 0          | 0 | 0           | 0            | 0           | 0            |
| 0 | 0           | 0 | 0          | 0 | 0.058824328 | 0            | 0           | -0.62741268  |
| 0 | 0           | 0 | 0          | 0 | 0           | 0.037103058  | 0           | 0            |
| 0 | 0           | 0 | 0          | 0 | 0.006266382 | 0            | 0.035490691 | 0            |
| 0 | 0           | 0 | 0          | 0 | 0.007264665 | 0            | 0           | 0            |
| 0 | 0           | 0 | 0.16343497 | 0 | 0           | -0.021942268 | 0           | 0            |
| 0 | 0           | 0 | 0          | 0 | 0.02662972  | 0            | 0           | 0            |
| 0 | 0           | 0 | 0          | 0 | 0.022575953 | 0            | 0.066905293 | 0            |
| 0 | 0           | 0 | 0          | 0 | 0           | -0.027133137 | 0           | 0            |
| 0 | 0           | 0 | 0          | 0 | 0           | 0            | 0           | 0            |
| 0 | -0.24975778 | 0 | 0.34970129 | 0 | -0.49562123 | 0            | 0           | 0            |
| 0 | -0.24637562 | 0 | 0.34796884 | 0 | -0.49189629 | 0            | 0.022153013 | 0            |
| 0 | -0.24735581 | 0 | 0.34247478 | 0 | -0.48741475 | 0            | 0           | 0            |
| 0 | 0           | 0 | 0.2008584  | 0 | 0           | 0.037857295  | 0           | 0            |
| 0 | 0           | 0 | 0.17284364 | 0 | 0           | 0.018664656  | 0           | 0            |
| 0 | -0.22655457 | 0 | 0.13773158 | 0 | 0           | 0            | 0           | 0            |
| 0 | 0           | 0 | 0          | 0 | 0.098575154 | 0            | 0           | 0            |
| 0 | 0           | 0 | 0          | 0 | 0           | 0            | 0           | 0            |
| 0 | 0           | 0 | 0          | 0 | 0           | 0.00203491   | 0           | 0            |
| 0 | 0           | 0 | 0          | 0 | 0           | -0.071421758 | 0           | 0            |
| 0 | 0           | 0 | 0          | 0 | 0.024090084 | 0            | 0           | 0            |
| 0 | -0.17125519 | 0 | 0.19119032 | 0 | 0           | 0            | 0           | -0.065460957 |
| 0 | 0           | 0 | 0          | 0 | 0           | -0.023387144 | 0           | 0            |
| 0 | -0.17701651 | 0 | 0.18987708 | 0 | 0           | 0            | 0           | 0            |
| 0 | -0.20996727 | 0 | 0.18075076 | 0 | 0           | 0            | 0           | 0            |
| 0 | -0.23243886 | 0 | 0.12764294 | 0 | 0           | -0.10496134  | 0           | 0            |

|   |             |   |             |   |              |   |              |   |              |
|---|-------------|---|-------------|---|--------------|---|--------------|---|--------------|
| 0 | -0.21122568 | 0 | 0.18376795  | 0 | 0            | 0 | -0.026802897 | 0 | 0            |
| 0 | -0.21112068 | 0 | 0.18196908  | 0 | 0            | 0 | 0            | 0 | 0            |
| 0 | 0           | 0 | 0           | 0 | 0.038594874  | 0 | -0.096464763 | 0 | 0            |
| 0 | -0.1842192  | 0 | 0.17177164  | 0 | 0            | 0 | -0.092547304 | 0 | -0.058017604 |
| 0 | -0.21798376 | 0 | 0.16353296  | 0 | 0            | 0 | -0.085545702 | 0 | 0            |
| 0 | -0.18901873 | 0 | 0.17100535  | 0 | 0            | 0 | -0.091799552 | 0 | 0            |
| 0 | -0.21618883 | 0 | 0.16684477  | 0 | 0            | 0 | -0.079005439 | 0 | 0            |
| 0 | 0           | 0 | 0           | 0 | -0.018032192 | 0 | 0            | 0 | 0            |
| 0 | 0           | 0 | 0           | 0 | 0            | 0 | 0.004019889  | 0 | 0            |
| 0 | -0.22735023 | 0 | 0.13396861  | 0 | 0            | 0 | 0            | 0 | 0            |
| 0 | -0.29402661 | 0 | 0           | 0 | -0.10286596  | 0 | 0            | 0 | 0            |
| 0 | -0.33772254 | 0 | 0           | 0 | -0.11435587  | 0 | 0            | 0 | 0            |
| 0 | -0.33261784 | 0 | 0           | 0 | -0.11258635  | 0 | 0            | 0 | 0.060034445  |
| 0 | -0.17004328 | 0 | 0.18964625  | 0 | 0            | 0 | 0            | 0 | -0.067524761 |
| 0 | 0           | 0 | 0           | 0 | 0.033189748  | 0 | -0.088852879 | 0 | 0            |
| 0 | -0.29407696 | 0 | 0           | 0 | -0.092750521 | 0 | -0.012623904 | 0 | 0            |
| 0 | 0           | 0 | 0.3336624   | 0 | -0.23258813  | 0 | 0            | 0 | -0.19340294  |
| 0 | -0.29351238 | 0 | 0           | 0 | -0.091398073 | 0 | 0            | 0 | 0            |
| 0 | -0.29761611 | 0 | 0           | 0 | -0.10329912  | 0 | 0            | 0 | 0            |
| 0 | -0.17583921 | 0 | 0.18833711  | 0 | 0            | 0 | 0            | 0 | 0            |
| 0 | -0.21999711 | 0 | 0.1286147   | 0 | 0            | 0 | 0            | 0 | 0            |
| 0 | 0           | 0 | 0           | 0 | 0.095861348  | 0 | 0            | 0 | 0            |
| 0 | -0.23297863 | 0 | 0.12435437  | 0 | 0            | 0 | -0.10012682  | 0 | 0            |
| 0 | 0           | 0 | 0.36909862  | 0 | -0.22099714  | 0 | 0            | 0 | -0.18829234  |
| 0 | 0           | 0 | 0.33397425  | 0 | -0.23002599  | 0 | 0            | 0 | -0.62719616  |
| 0 | -0.22836023 | 0 | 0.1072157   | 0 | 0            | 0 | 0            | 0 | 0            |
| 0 | -0.22096136 | 0 | 0.10619997  | 0 | 0            | 0 | 0            | 0 | -0.62667542  |
| 0 | -0.21140515 | 0 | 0.18186003  | 0 | 0            | 0 | -0.024829139 | 0 | 0            |
| 0 | -0.20411458 | 0 | 0.13031649  | 0 | 0            | 0 | 0            | 0 | -0.030768321 |
| 0 | 0           | 0 | 0.33516548  | 0 | -0.23382413  | 0 | 0            | 0 | 0            |
| 0 | -0.21142811 | 0 | 0.18015136  | 0 | 0            | 0 | 0            | 0 | 0            |
| 0 | -0.20890476 | 0 | 0.13011128  | 0 | 0            | 0 | 0            | 0 | 0            |
| 0 | 0           | 0 | 0.33203456  | 0 | -0.19272471  | 0 | -0.04685888  | 0 | -0.19605507  |
| 0 | 0           | 0 | 0.32803426  | 0 | -0.17726583  | 0 | 0            | 0 | -0.19634072  |
| 0 | -0.18227393 | 0 | 0.17149151  | 0 | 0            | 0 | -0.086543676 | 0 | -0.060430092 |
| 0 | -0.26988855 | 0 | 0           | 0 | 0            | 0 | 0            | 0 | 0            |
| 0 | -0.18713969 | 0 | 0.17073407  | 0 | 0            | 0 | -0.085796847 | 0 | 0            |
| 0 | 0           | 0 | 0.37097675  | 0 | -0.22212086  | 0 | 0            | 0 | 0            |
| 0 | -0.21660402 | 0 | 0.10505894  | 0 | 0            | 0 | 0            | 0 | -0.035579175 |
| 0 | 0           | 0 | 0.33269044  | 0 | -0.21952334  | 0 | 0            | 0 | -0.18925776  |
| 0 | -0.22150792 | 0 | 0.10480841  | 0 | 0            | 0 | 0            | 0 | 0            |
| 0 | -0.33508402 | 0 | 0           | 0 | -0.11411283  | 0 | 0            | 0 | 0            |
| 0 | -0.21613131 | 0 | 0.16612519  | 0 | 0            | 0 | -0.073513238 | 0 | 0            |
| 0 | -0.24087616 | 0 | 0.093097571 | 0 | 0            | 0 | 0            | 0 | 0            |
| 0 | 0           | 0 | 0.33342713  | 0 | -0.19306893  | 0 | -0.047906664 | 0 | 0            |
| 0 | 0           | 0 | 0           | 0 | 0.12622863   | 0 | 0            | 0 | 0            |
| 0 | 0           | 0 | 0.32961036  | 0 | -0.17909551  | 0 | 0            | 0 | 0            |

|   |             |   |             |   |              |   |              |              |
|---|-------------|---|-------------|---|--------------|---|--------------|--------------|
| 0 | -0.32993502 | 0 | 0           | 0 | -0.11235025  | 0 | 0            | 0.056908194  |
| 0 | -0.27225913 | 0 | 0           | 0 | 0            | 0 | -0.018760682 | 0            |
| 0 | -0.22890173 | 0 | 0.2774472   | 0 | -0.35665443  | 0 | 0.1348498    | 0            |
| 0 | -0.27616143 | 0 | 0           | 0 | 0            | 0 | 0            | 0            |
| 0 | -0.27235605 | 0 | 0           | 0 | 0            | 0 | 0            | 0            |
| 0 | -0.27149489 | 0 | 0           | 0 | 0            | 0 | 0            | -0.00071429  |
| 0 | 0           | 0 | 0           | 0 | 0.10150329   | 0 | -0.004652018 | 0            |
| 0 | -0.27179011 | 0 | 0           | 0 | 0            | 0 | -0.075593651 | 0            |
| 0 | -0.22277796 | 0 | 0.10096585  | 0 | 0            | 0 | 0            | -0.030245202 |
| 0 | -0.22845323 | 0 | 0.09920948  | 0 | 0            | 0 | 0            | 0            |
| 0 | 0           | 0 | 0.33411748  | 0 | -0.22003865  | 0 | 0            | 0            |
| 0 | 0           | 0 | 0           | 0 | 0.11922919   | 0 | 0            | 0            |
| 0 | -0.29757095 | 0 | 0           | 0 | -0.10507149  | 0 | 0            | 0            |
| 0 | -0.29406369 | 0 | 0           | 0 | -0.097098599 | 0 | -0.005952676 | 0            |
| 0 | -0.29457195 | 0 | 0           | 0 | -0.099695476 | 0 | 0            | 0            |
| 0 | 0           | 0 | 0.33455783  | 0 | -0.22757093  | 0 | 0            | -0.62718244  |
| 0 | -0.27190632 | 0 | 0           | 0 | 0            | 0 | -0.070009564 | 0            |
| 0 | -0.2779452  | 0 | 0           | 0 | 0            | 0 | -0.074719254 | 0            |
| 0 | -0.27375294 | 0 | 0           | 0 | 0            | 0 | -0.074856189 | 9.47E-05     |
| 0 | 0           | 0 | 0.3648946   | 0 | -0.21952306  | 0 | 0            | -0.1898191   |
| 0 | -0.21691407 | 0 | 0.10985681  | 0 | 0            | 0 | 0            | -0.62668048  |
| 0 | 0           | 0 | 0.33291451  | 0 | -0.19721971  | 0 | -0.03783923  | -0.19637059  |
| 0 | 0           | 0 | 0           | 0 | 0.079506913  | 0 | -0.035465591 | 0            |
| 0 | -0.2290141  | 0 | 0.10476201  | 0 | 0            | 0 | 0            | 0            |
| 0 | 0           | 0 | 0.32997113  | 0 | -0.18739737  | 0 | 0            | -0.196443    |
| 0 | -0.20107764 | 0 | 0.13218763  | 0 | 0            | 0 | 0            | -0.0349855   |
| 0 | -0.21919199 | 0 | 0.34343681  | 0 | -0.39274068  | 0 | 0.16390982   | 0            |
| 0 | -0.20592295 | 0 | 0.13198803  | 0 | 0            | 0 | 0            | 0            |
| 0 | 0           | 0 | 0.36676756  | 0 | -0.22064262  | 0 | 0            | 0            |
| 0 | 0           | 0 | 0.33351376  | 0 | -0.21962851  | 0 | 0            | -0.19111079  |
| 0 | 0           | 0 | 0           | 0 | 0.12425475   | 0 | 0.011123871  | 0            |
| 0 | -0.26374853 | 0 | 0           | 0 | 0            | 0 | 0            | 0            |
| 0 | 0           | 0 | 0           | 0 | 0            | 0 | 0            | 0            |
| 0 | 0           | 0 | 0.33431621  | 0 | -0.19756588  | 0 | -0.038886818 | 0            |
| 0 | -0.27400882 | 0 | 0           | 0 | 0            | 0 | 0            | -0.62250512  |
| 0 | 0           | 0 | 0           | 0 | 0            | 0 | 0.076439731  | 0            |
| 0 | 0           | 0 | 0.33154398  | 0 | -0.18922129  | 0 | 0            | 0            |
| 0 | 0           | 0 | 0.24338885  | 0 | 0            | 0 | 0            | -0.21600278  |
| 0 | -0.21380798 | 0 | 0.3427986   | 0 | -0.3820182   | 0 | 0.1840205    | 0            |
| 0 | 0           | 0 | 0.24591892  | 0 | 0            | 0 | 0            | -0.62730953  |
| 0 | -0.2070645  | 0 | 0.34165089  | 0 | -0.37734924  | 0 | 0.18001985   | -0.000890106 |
| 0 | 0           | 0 | 0.33493805  | 0 | -0.22013953  | 0 | 0            | 0            |
| 0 | -0.27154673 | 0 | 0           | 0 | 0            | 0 | -0.017152971 | 0            |
| 0 | -0.22150364 | 0 | 0.099544721 | 0 | 0            | 0 | 0            | -0.032244776 |
| 0 | -0.27398577 | 0 | 0           | 0 | 0            | 0 | 0            | 0            |
| 0 | -0.27174058 | 0 | 0           | 0 | 0            | 0 | 0            | 0            |
| 0 | -0.26927482 | 0 | 0           | 0 | 0            | 0 | 0            | -0.003409633 |

|   |             |   |             |   |              |   |              |              |
|---|-------------|---|-------------|---|--------------|---|--------------|--------------|
| 0 | -0.27636385 | 0 | 0           | 0 | 0            | 0 | 0            | 0            |
| 0 | -0.27189719 | 0 | 0           | 0 | 0            | 0 | 0            | 0.010549792  |
| 0 | -0.22721576 | 0 | 0.097793181 | 0 | 0            | 0 | 0            | 0            |
| 0 | 0           | 0 | 0           | 0 | 0.11776066   | 0 | 0            | 0            |
| 0 | -0.27469958 | 0 | 0           | 0 | 0            | 0 | 0            | 0            |
| 0 | -0.2700601  | 0 | 0           | 0 | 0            | 0 | 0            | -0.001786467 |
| 0 | 0           | 0 | 0           | 0 | 0.097354637  | 0 | 0.003998584  | 0            |
| 0 | 0           | 0 | 0.24413323  | 0 | 0            | 0 | 0            | 0            |
| 0 | 0           | 0 | 0.2481259   | 0 | 0            | 0 | -0.035182635 | 0            |
| 0 | 0           | 0 | 0.2386489   | 0 | 0            | 0 | 0            | -0.21650741  |
| 0 | -0.27130406 | 0 | 0           | 0 | 0            | 0 | -0.06650432  | 0            |
| 0 | 0           | 0 | 0.24576548  | 0 | 0            | 0 | 0            | -0.21544174  |
| 0 | -0.27579812 | 0 | 0           | 0 | 0            | 0 | -0.07088271  | 0            |
| 0 | -0.27154255 | 0 | 0           | 0 | 0            | 0 | -0.071013211 | 0            |
| 0 | 0           | 0 | 0           | 0 | 0            | 0 | 0.03687191   | 0            |
| 0 | 0           | 0 | 0           | 0 | 0            | 0 | 0.026520736  | 0            |
| 0 | -0.23099004 | 0 | 0.25046158  | 0 | -0.30052771  | 0 | 0            | 0            |
| 0 | 0           | 0 | 0.24902651  | 0 | 0            | 0 | -0.037969968 | 0            |
| 0 | 0           | 0 | 0.23971978  | 0 | 0            | 0 | 0            | 0            |
| 0 | 0           | 0 | 0.24652169  | 0 | 0            | 0 | 0            | 0            |
| 0 | -0.27194488 | 0 | 0           | 0 | 0            | 0 | 0            | -0.62522081  |
| 0 | 0           | 0 | 0           | 0 | 0.11569171   | 0 | 0.014142065  | 0            |
| 0 | -0.27423888 | 0 | 0           | 0 | 0            | 0 | 0            | 0            |
| 0 | 0           | 0 | 0           | 0 | 0            | 0 | 0.039890405  | 0            |
| 0 | -0.26954829 | 0 | 0           | 0 | 0            | 0 | 0            | 0.007154989  |
| 0 | 0           | 0 | 0           | 0 | -0.027225638 | 0 | 0.021737492  | 0            |
| 0 | 0           | 0 | 0.21855375  | 0 | 0            | 0 | -0.1369939   | 0            |
| 0 | 0           | 0 | 0           | 0 | -0.015949623 | 0 | 0            | 0            |
| 0 | -0.19199263 | 0 | 0.23951946  | 0 | -0.25885226  | 0 | 0            | -0.038882885 |
| 0 | 0           | 0 | 0.24354891  | 0 | 0            | 0 | 0            | -0.6273019   |
| 0 | -0.1972773  | 0 | 0.23875809  | 0 | -0.26052697  | 0 | 0            | 0            |
| 0 | 0           | 0 | 0.22025589  | 0 | 0            | 0 | -0.13629356  | 0            |
| 0 | 0           | 0 | 0.21974795  | 0 | 0            | 0 | -0.13822939  | 0            |
| 0 | 0           | 0 | 0           | 0 | 0            | 0 | 0.039024962  | 0            |
| 0 | 0           | 0 | 0.22317175  | 0 | 0            | 0 | -0.12442374  | 0            |
| 0 | 0           | 0 | 0.24561736  | 0 | 0            | 0 | -0.032925342 | 0            |
| 0 | 0           | 0 | 0.22934691  | 0 | 0            | 0 | -0.13173518  | 0            |
| 0 | 0           | 0 | 0.23446424  | 0 | 0            | 0 | 0            | -0.21792868  |
| 0 | 0           | 0 | 0.24339279  | 0 | 0            | 0 | 0            | -0.21679047  |
| 0 | 0           | 0 | 0.22442334  | 0 | 0            | 0 | -0.12515082  | 0            |
| 0 | 0           | 0 | 0.23055936  | 0 | 0            | 0 | -0.13295114  | 0            |
| 0 | 0           | 0 | 0.24651837  | 0 | 0            | 0 | -0.035725628 | 0            |
| 0 | 0           | 0 | 0.23553365  | 0 | 0            | 0 | 0            | 0            |
| 0 | 0           | 0 | 0.24414131  | 0 | 0            | 0 | 0            | 0            |
| 0 | 0           | 0 | 0           | 0 | -0.017989042 | 0 | 0.027855416  | 0            |
| 0 | 0           | 0 | 0.21896778  | 0 | 0            | 0 | -0.12956967  | 0            |
| 0 | 0           | 0 | 0.22171616  | 0 | 0            | 0 | -0.11856736  | 0            |

|   |             |   |            |   |              |   |             |   |              |
|---|-------------|---|------------|---|--------------|---|-------------|---|--------------|
| 0 | 0           | 0 | 0.22556368 | 0 | 0            | 0 | -0.12679326 | 0 | -0.22159866  |
| 0 | -0.13779886 | 0 | 0.34512113 | 0 | -0.28259582  | 0 | 0           | 0 | -0.097430112 |
| 0 | 0           | 0 | 0.22297446 | 0 | 0            | 0 | -0.11929687 | 0 | 0            |
| 0 | -0.14218789 | 0 | 0.34623801 | 0 | -0.28431375  | 0 | 0           | 0 | 0            |
| 0 | 0           | 0 | 0.22678312 | 0 | 0            | 0 | -0.1280129  | 0 | 0            |
| 0 | -0.28457288 | 0 | 0          | 0 | -0.069225308 | 0 | 0           | 0 | 0            |
| 0 | -0.2688144  | 0 | 0          | 0 | 0            | 0 | 0           | 0 | -0.62643037  |
| 0 | -0.32292402 | 0 | 0          | 0 | -0.0938299   | 0 | 0           | 0 | 0            |
| 0 | -0.31556786 | 0 | 0          | 0 | -0.088133421 | 0 | 0           | 0 | 0.042911536  |
| 0 | -0.2669481  | 0 | 0          | 0 | 0            | 0 | 0.045987079 | 0 | -0.6268068   |
| 0 | 0           | 0 | 0.16663837 | 0 | 0            | 0 | 0           | 0 | -0.20393103  |
| 0 | -0.28886182 | 0 | 0          | 0 | -0.067430608 | 0 | 0           | 0 | 0            |
| 0 | -0.28576275 | 0 | 0          | 0 | -0.066121523 | 0 | 0.011003803 | 0 | 0            |
| 0 | 0           | 0 | 0.16878677 | 0 | 0            | 0 | 0           | 0 | -0.62715328  |
| 0 | -0.26975781 | 0 | 0          | 0 | 0            | 0 | 0           | 0 | 0            |
| 0 | -0.2631344  | 0 | 0          | 0 | 0            | 0 | 0           | 0 | -0.009269619 |
| 0 | -0.26831638 | 0 | 0          | 0 | 0            | 0 | 0.004964344 | 0 | 0            |
| 0 | -0.26784834 | 0 | 0          | 0 | 0            | 0 | 0           | 0 | 0            |
| 0 | 0           | 0 | 0.20345403 | 0 | 0            | 0 | 0           | 0 | -0.20235533  |
| 0 | -0.27129052 | 0 | 0          | 0 | -0.020337915 | 0 | 0.062541327 | 0 | 0            |
| 0 | -0.27009663 | 0 | 0          | 0 | 0            | 0 | 0.03380642  | 0 | 0            |
| 0 | -0.26805258 | 0 | 0          | 0 | 0            | 0 | 0           | 0 | -0.62668381  |
| 0 | -0.26119082 | 0 | 0          | 0 | 0            | 0 | 0.043463732 | 0 | -0.010388534 |
| 0 | -0.26619105 | 0 | 0          | 0 | 0            | 0 | 0.043713618 | 0 | 0            |
| 0 | 0           | 0 | 0.16768076 | 0 | 0            | 0 | 0           | 0 | 0            |
| 0 | -0.26233762 | 0 | 0          | 0 | 0            | 0 | 0           | 0 | -0.021825328 |
| 0 | -0.24952833 | 0 | 0          | 0 | 0.03138583   | 0 | 0           | 0 | -0.62654684  |
| 0 | -0.26810914 | 0 | 0          | 0 | 0            | 0 | 0           | 0 | -0.007182698 |
| 0 | -0.27195496 | 0 | 0          | 0 | 0            | 0 | 0.002602325 | 0 | 0            |
| 0 | -0.27274788 | 0 | 0          | 0 | 0            | 0 | 0           | 0 | 0            |
| 0 | -0.26713288 | 0 | 0          | 0 | 0            | 0 | 0           | 0 | 0            |
| 0 | -0.27195992 | 0 | 0          | 0 | 0.007389015  | 0 | 0           | 0 | 0            |
| 0 | -0.267595   | 0 | 0          | 0 | 0            | 0 | 0.004248021 | 0 | -0.004796112 |
| 0 | -0.27227728 | 0 | 0          | 0 | 0            | 0 | 0.004321242 | 0 | 0            |
| 0 | -0.27881003 | 0 | 0          | 0 | -0.024557414 | 0 | 0.052432765 | 0 | 0            |
| 0 | 0           | 0 | 0.20461575 | 0 | 0            | 0 | 0           | 0 | 0            |
| 0 | 0           | 0 | 0.42758787 | 0 | -0.26368525  | 0 | 0           | 0 | 0            |
| 0 | -0.25741233 | 0 | 0          | 0 | 0            | 0 | 0           | 0 | -0.6266847   |
| 0 | -0.09641102 | 0 | 0.34250616 | 0 | -0.22609152  | 0 | 0           | 0 | -0.62691829  |
| 0 | -0.2670013  | 0 | 0          | 0 | 0            | 0 | 0.032852076 | 0 | -0.00997691  |
| 0 | -0.271862   | 0 | 0          | 0 | 0            | 0 | 0.033662278 | 0 | 0            |
| 0 | -0.28129091 | 0 | 0          | 0 | -0.020996644 | 0 | 0.064983068 | 0 | 0            |
| 0 | -0.27469778 | 0 | 0          | 0 | -0.017818378 | 0 | 0.061730221 | 0 | 0.003333437  |
| 0 | -0.24454201 | 0 | 0          | 0 | 0.029853457  | 0 | 0           | 0 | -0.028042629 |
| 0 | -0.24959659 | 0 | 0          | 0 | 0.029324027  | 0 | 0           | 0 | 0            |
| 0 | 0           | 0 | 0.35129879 | 0 | -0.31511414  | 0 | 0           | 0 | -0.62689381  |
| 0 | 0           | 0 | 0.37737036 | 0 | -0.24286708  | 0 | 0           | 0 | 0            |

|   |             |   |            |   |              |   |              |   |              |
|---|-------------|---|------------|---|--------------|---|--------------|---|--------------|
| 0 | -0.26142202 | 0 | 0          | 0 | 0.01071961   | 0 | 0            | 0 | -0.020863872 |
| 0 | 0           | 0 | 0.19086489 | 0 | 0            | 0 | 0            | 0 | -0.2226353   |
| 0 | 0           | 0 | 0.1944553  | 0 | 0            | 0 | 0            | 0 | -0.62729495  |
| 0 | -0.26658053 | 0 | 0          | 0 | 0.009941129  | 0 | 0            | 0 | 0            |
| 0 | 0           | 0 | 0.41650191 | 0 | -0.24010968  | 0 | 0            | 0 | 0            |
| 0 | -0.32535297 | 0 | 0          | 0 | -0.10267032  | 0 | 0            | 0 | 0            |
| 0 | 0           | 0 | 0.16969537 | 0 | 0            | 0 | 0            | 0 | -0.62714162  |
| 0 | 0           | 0 | 0.44240893 | 0 | -0.29006266  | 0 | 0            | 0 | 0            |
| 0 | -0.3180214  | 0 | 0          | 0 | -0.097020323 | 0 | 0            | 0 | 0.044931695  |
| 0 | -0.34742885 | 0 | 0          | 0 | -0.25846969  | 0 | 0            | 0 | 0            |
| 0 | -0.26647203 | 0 | 0          | 0 | 0            | 0 | 0            | 0 | -0.62663989  |
| 0 | 0           | 0 | 0.36891838 | 0 | -0.3300841   | 0 | 0            | 0 | -0.19081104  |
| 0 | 0           | 0 | 0.43012417 | 0 | -0.26329488  | 0 | 0.004086099  | 0 | 0            |
| 0 | 0           | 0 | 0.35048167 | 0 | -0.31417265  | 0 | 0.007813122  | 0 | -0.19404549  |
| 0 | -0.29009059 | 0 | 0          | 0 | -0.075411799 | 0 | 0            | 0 | 0            |
| 0 | 0           | 0 | 0.35095822 | 0 | -0.31440635  | 0 | 0            | 0 | -0.1932893   |
| 0 | -0.34064553 | 0 | 0          | 0 | -0.25306377  | 0 | 0            | 0 | 0.066286816  |
| 0 | 0           | 0 | 0.2004829  | 0 | 0            | 0 | 0            | 0 | -0.20422795  |
| 0 | -0.28678046 | 0 | 0          | 0 | -0.074258557 | 0 | 0.013650502  | 0 | 0            |
| 0 | 0           | 0 | 0.34469695 | 0 | -0.2789845   | 0 | 0.072081674  | 0 | -0.62715821  |
| 0 | 0           | 0 | 0.19191793 | 0 | 0            | 0 | 0            | 0 | 0            |
| 0 | -0.26446622 | 0 | 0          | 0 | 0            | 0 | 0.051806048  | 0 | -0.62683146  |
| 0 | 0           | 0 | 0.38274783 | 0 | -0.25442063  | 0 | -0.028971451 | 0 | 0            |
| 0 | 0           | 0 | 0.38039087 | 0 | -0.24639431  | 0 | 0            | 0 | 0            |
| 0 | -0.29436075 | 0 | 0          | 0 | -0.2172755   | 0 | 0.02645383   | 0 | 0            |
| 0 | 0           | 0 | 0.37733081 | 0 | -0.23367685  | 0 | -0.01037903  | 0 | 0            |
| 0 | 0           | 0 | 0.37141178 | 0 | -0.33247455  | 0 | 0            | 0 | 0            |
| 0 | 0           | 0 | 0.37690466 | 0 | -0.23601851  | 0 | 0            | 0 | 0            |
| 0 | -0.29565255 | 0 | 0          | 0 | -0.21775223  | 0 | 0            | 0 | 0            |
| 0 | 0           | 0 | 0.12690928 | 0 | 0            | 0 | 0            | 0 | -0.62728674  |
| 0 | 0           | 0 | 0.35241198 | 0 | -0.31588458  | 0 | 0            | 0 | 0            |
| 0 | 0           | 0 | 0.35207518 | 0 | -0.31571889  | 0 | 0.005392618  | 0 | 0            |
| 0 | 0           | 0 | 0.20164377 | 0 | 0            | 0 | 0            | 0 | 0            |
| 0 | -0.26578196 | 0 | 0          | 0 | 0            | 0 | 0            | 0 | -0.62669161  |
| 0 | 0           | 0 | 0.33415911 | 0 | -0.2720841   | 0 | 0.060541653  | 0 | -0.19789269  |
| 0 | 0           | 0 | 0.3447186  | 0 | -0.27922718  | 0 | 0.063777917  | 0 | -0.19921058  |
| 0 | -0.26594603 | 0 | 0          | 0 | 0            | 0 | 0            | 0 | -0.010020312 |
| 0 | -0.27130904 | 0 | 0          | 0 | 0            | 0 | 0.004294436  | 0 | 0            |
| 0 | -0.27063054 | 0 | 0          | 0 | 0            | 0 | 0            | 0 | 0            |
| 0 | -0.26533625 | 0 | 0          | 0 | 0            | 0 | 0.006005761  | 0 | -0.007473589 |
| 0 | -0.27007045 | 0 | 0          | 0 | 0            | 0 | 0.006038313  | 0 | 0            |
| 0 | 0           | 0 | 0.31036875 | 0 | -0.22998527  | 0 | 0            | 0 | -0.626942    |
| 0 | -0.27895995 | 0 | 0          | 0 | -0.027720305 | 0 | 0.059896546  | 0 | 0            |
| 0 | 0           | 0 | 0.19192965 | 0 | 0            | 0 | 0            | 0 | -0.62729919  |
| 0 | -0.26465409 | 0 | 0          | 0 | 0            | 0 | 0.037629357  | 0 | -0.013115587 |
| 0 | -0.24456492 | 0 | 0          | 0 | 0.035809349  | 0 | 0            | 0 | -0.62675107  |
| 0 | -0.26959334 | 0 | 0          | 0 | 0            | 0 | 0.038433694  | 0 | 0            |

|   |             |   |             |   |              |   |              |   |              |
|---|-------------|---|-------------|---|--------------|---|--------------|---|--------------|
| 0 | -0.2797754  | 0 | 0           | 0 | -0.0229751   | 0 | 0.072659432  | 0 | 0            |
| 0 | -0.27310215 | 0 | 0           | 0 | -0.019795137 | 0 | 0.069397964  | 0 | 0.001419347  |
| 0 | 0           | 0 | 0.38091011  | 0 | -0.2388399   | 0 | -0.021000938 | 0 | 0            |
| 0 | 0           | 0 | 0.34589813  | 0 | -0.24501177  | 0 | 0            | 0 | -0.62716385  |
| 0 | -0.30359987 | 0 | 0           | 0 | -0.19307304  | 0 | 0.089555239  | 0 | 0            |
| 0 | -0.29701214 | 0 | 0           | 0 | -0.1890017   | 0 | 0.086439447  | 0 | 0.024278773  |
| 0 | -0.28508592 | 0 | 0           | 0 | -0.18369687  | 0 | 0.075068428  | 0 | 0            |
| 0 | 0           | 0 | 0.3357295   | 0 | -0.27270588  | 0 | 0.059759809  | 0 | 0            |
| 0 | 0           | 0 | 0.34622599  | 0 | -0.27963699  | 0 | 0.063455305  | 0 | 0            |
| 0 | 0           | 0 | 0.3181132   | 0 | -0.24219909  | 0 | 0            | 0 | -0.20978096  |
| 0 | 0           | 0 | 0.4134435   | 0 | -0.24003914  | 0 | 0            | 0 | 0            |
| 0 | -0.25802921 | 0 | 0           | 0 | 0.012844817  | 0 | 0            | 0 | -0.025745859 |
| 0 | 0           | 0 | 0.44340443  | 0 | -0.29948523  | 0 | 0            | 0 | 0            |
| 0 | -0.26324613 | 0 | 0           | 0 | 0.012072438  | 0 | 0            | 0 | 0            |
| 0 | 0           | 0 | 0.42818904  | 0 | -0.26682779  | 0 | 0.011115213  | 0 | 0            |
| 0 | -0.26072485 | 0 | 0           | 0 | -0.13666596  | 0 | 0            | 0 | -0.62636608  |
| 0 | 0           | 0 | 0.31954255  | 0 | -0.24273678  | 0 | 0            | 0 | 0            |
| 0 | 0           | 0 | 0.37886368  | 0 | -0.24650853  | 0 | 0            | 0 | 0            |
| 0 | 0           | 0 | 0.37839835  | 0 | -0.23883935  | 0 | -0.001854742 | 0 | 0            |
| 0 | -0.27054838 | 0 | 0           | 0 | -0.15024904  | 0 | 0            | 0 | -0.012527308 |
| 0 | -0.27562359 | 0 | 0           | 0 | -0.15241031  | 0 | 0            | 0 | 0            |
| 0 | 0           | 0 | 0.38265654  | 0 | -0.24921794  | 0 | -0.0180977   | 0 | 0            |
| 0 | 0           | 0 | 0           | 0 | -0.010735816 | 0 | 0.067572989  | 0 | 0            |
| 0 | 0           | 0 | 0.2677511   | 0 | 0            | 0 | 0            | 0 | 0            |
| 0 | 0           | 0 | 0           | 0 | 0.1232054    | 0 | 0            | 0 | -0.25668442  |
| 0 | 0           | 0 | 0.27135639  | 0 | 0            | 0 | -0.018602285 | 0 | 0            |
| 0 | 0           | 0 | 0.27052608  | 0 | 0            | 0 | 0            | 0 | 0            |
| 0 | 0           | 0 | 0.27118974  | 0 | 0            | 0 | -0.027067075 | 0 | 0            |
| 0 | 0           | 0 | 0.27154609  | 0 | 0            | 0 | 0            | 0 | 0            |
| 0 | 0           | 0 | 0           | 0 | 0.12290563   | 0 | 0            | 0 | 0            |
| 0 | -0.13178385 | 0 | 0.073086348 | 0 | 0            | 0 | 0            | 0 | -0.1285819   |
| 0 | 0           | 0 | 0.27610178  | 0 | 0            | 0 | -0.027792309 | 0 | 0            |
| 0 | 0           | 0 | 0           | 0 | 0            | 0 | 0            | 0 | -0.25256277  |
| 0 | 0           | 0 | 0.24476087  | 0 | 0            | 0 | -0.10224234  | 0 | 0            |
| 0 | -0.13788877 | 0 | 0.070510466 | 0 | 0            | 0 | 0            | 0 | 0            |
| 0 | -0.17707335 | 0 | 0           | 0 | 0            | 0 | 0            | 0 | -0.62668583  |
| 0 | -0.15302163 | 0 | 0.049701698 | 0 | 0            | 0 | 0            | 0 | -0.6267036   |
| 0 | 0           | 0 | 0           | 0 | 0.11465888   | 0 | 0            | 0 | -0.2571262   |
| 0 | -0.13983667 | 0 | 0.063781734 | 0 | 0            | 0 | -0.045686107 | 0 | -0.12306875  |
| 0 | 0           | 0 | 0           | 0 | 0            | 0 | 0            | 0 | -0.62850367  |
| 0 | -0.17930748 | 0 | 0           | 0 | 0            | 0 | -0.030672372 | 0 | -0.62656044  |
| 0 | 0           | 0 | 0.26077085  | 0 | 0            | 0 | -0.095565417 | 0 | 0            |
| 0 | -0.1794491  | 0 | 0           | 0 | 0            | 0 | 0            | 0 | -0.62679301  |
| 0 | -0.14489207 | 0 | 0.056839846 | 0 | 0            | 0 | 0            | 0 | -0.10900776  |
| 0 | 0           | 0 | 0           | 0 | 0            | 0 | 0            | 0 | 0            |
| 0 | -0.14533112 | 0 | 0.061607888 | 0 | 0            | 0 | -0.045343703 | 0 | 0            |
| 0 | -0.17634789 | 0 | 0           | 0 | 0            | 0 | 0.016344446  | 0 | -0.097111875 |

|   |              |   |             |   |              |   |              |              |
|---|--------------|---|-------------|---|--------------|---|--------------|--------------|
| 0 | -0.17600286  | 0 | 0           | 0 | 0            | 0 | 0            | -0.096592806 |
| 0 | -0.1504167   | 0 | 0.054755778 | 0 | 0            | 0 | 0            | 0            |
| 0 | 0            | 0 | 0           | 0 | 0            | 0 | -0.077885377 | -0.25391745  |
| 0 | -0.18078889  | 0 | 0           | 0 | 0            | 0 | 0.015526753  | 0            |
| 0 | -0.18030493  | 0 | 0           | 0 | 0            | 0 | 0            | 0            |
| 0 | 0            | 0 | 0           | 0 | 0.11434997   | 0 | 0            | 0            |
| 0 | 0            | 0 | 0.26892371  | 0 | 0            | 0 | -0.016253749 | 0            |
| 0 | 0            | 0 | 0.2665984   | 0 | 0            | 0 | 0            | 0            |
| 0 | 0            | 0 | 0           | 0 | 0            | 0 | -0.011527074 | -0.25254407  |
| 0 | 0            | 0 | 0           | 0 | 0            | 0 | 0            | -0.25039123  |
| 0 | -0.17750006  | 0 | 0           | 0 | 0            | 0 | -0.023894958 | -0.091909266 |
| 0 | 0            | 0 | 0           | 0 | 0.055239142  | 0 | -0.11439003  | -0.25632506  |
| 0 | -0.1815949   | 0 | 0           | 0 | 0            | 0 | -0.023464399 | 0            |
| 0 | 0            | 0 | 0           | 0 | 0            | 0 | -0.075109633 | -0.62730175  |
| 0 | 0            | 0 | 0           | 0 | 0            | 0 | -0.079071914 | 0            |
| 0 | 0            | 0 | 0           | 0 | 0            | 0 | 0            | -0.23837443  |
| 0 | 0            | 0 | 0.26119262  | 0 | 0            | 0 | -0.13430245  | 0            |
| 0 | 0            | 0 | 0           | 0 | 0            | 0 | 0            | -0.62867613  |
| 0 | -0.20970159  | 0 | 0.038120339 | 0 | 0            | 0 | 0            | 0            |
| 0 | 0            | 0 | 0           | 0 | 0            | 0 | -0.014829734 | 0            |
| 0 | 0            | 0 | 0           | 0 | 0            | 0 | 0            | 0            |
| 0 | 0            | 0 | 0.23542889  | 0 | 0            | 0 | 0            | 0            |
| 0 | -0.2133438   | 0 | 0.036431795 | 0 | 0            | 0 | 0.018820367  | 0            |
| 0 | 0            | 0 | 0           | 0 | 0            | 0 | -0.065616883 | -0.24758272  |
| 0 | 0            | 0 | 0.2721624   | 0 | 0            | 0 | -0.02565816  | 0            |
| 0 | 0            | 0 | 0           | 0 | 0.056244711  | 0 | -0.11623383  | 0            |
| 0 | 0            | 0 | 0           | 0 | 0            | 0 | 0            | -0.62865496  |
| 0 | -0.22435719  | 0 | 0           | 0 | 0            | 0 | 0.023323221  | 0            |
| 0 | 0            | 0 | 0.44261396  | 0 | -0.40813111  | 0 | 0            | 0            |
| 0 | 0            | 0 | 0.1427926   | 0 | 0            | 0 | 0            | -0.62706458  |
| 0 | -0.21089142  | 0 | 0.032939105 | 0 | 0            | 0 | -0.017732142 | 0            |
| 0 | 0            | 0 | 0           | 0 | 0            | 0 | 0            | -0.62743813  |
| 0 | 0            | 0 | 0           | 0 | 0            | 0 | 0            | 0            |
| 0 | 0            | 0 | 0           | 0 | 0            | 0 | 0            | -0.25119546  |
| 0 | 0            | 0 | 0           | 0 | 0            | 0 | -0.009639643 | -0.25323272  |
| 0 | 0            | 0 | 0.2571949   | 0 | 0            | 0 | -0.09075762  | 0            |
| 0 | 0            | 0 | 0           | 0 | 0            | 0 | -0.066294195 | 0            |
| 0 | 0            | 0 | 0           | 0 | -0.011732782 | 0 | 0            | -0.25159875  |
| 0 | 0            | 0 | 0.39703717  | 0 | -0.36907415  | 0 | 0.023751326  | 0            |
| 0 | 0            | 0 | 0           | 0 | 0            | 0 | -0.071398541 | -0.62730792  |
| 0 | 0            | 0 | 0.45011314  | 0 | -0.41604824  | 0 | 0.020851296  | 0            |
| 0 | 0            | 0 | 0           | 0 | 0.049901727  | 0 | -0.10697363  | -0.25669583  |
| 0 | -0.080497945 | 0 | 0.14990291  | 0 | 0            | 0 | 0            | -0.62720352  |
| 0 | -0.085003034 | 0 | 0.14391461  | 0 | 0            | 0 | 0            | -0.62709253  |
| 0 | 0            | 0 | 0.14271413  | 0 | 0            | 0 | 0            | -0.23770305  |
| 0 | -0.088149612 | 0 | 0.14012013  | 0 | 0            | 0 | 0.001209691  | -0.62711662  |
| 0 | 0            | 0 | 0.1427579   | 0 | 0            | 0 | 0.005405528  | -0.23949088  |



|   |              |   |            |   |              |   |              |   |             |
|---|--------------|---|------------|---|--------------|---|--------------|---|-------------|
| 0 | 0            | 0 | 0          | 0 | 0.012816329  | 0 | 0            | 0 | -0.23779334 |
| 0 | 0            | 0 | 0          | 0 | -0.007361835 | 0 | 0            | 0 | -0.62838721 |
| 0 | 0            | 0 | 0          | 0 | 0            | 0 | -0.012945412 | 0 | 0           |
| 0 | 0            | 0 | 0          | 0 | 0            | 0 | 0            | 0 | 0           |
| 0 | 0            | 0 | 0          | 0 | 0            | 0 | -0.062177069 | 0 | -0.24838429 |
| 0 | 0            | 0 | 0          | 0 | -0.011736614 | 0 | 0            | 0 | 0           |
| 0 | 0            | 0 | 0          | 0 | 0.050918407  | 0 | -0.10882946  | 0 | 0           |
| 0 | -0.080270517 | 0 | 0.14923387 | 0 | 0            | 0 | 0.022145382  | 0 | -0.16541272 |
| 0 | 0            | 0 | 0.13629996 | 0 | 0            | 0 | -0.066435285 | 0 | -0.62683568 |
| 0 | 0            | 0 | 0.14361948 | 0 | 0            | 0 | 0            | 0 | 0           |
| 0 | 0            | 0 | 0          | 0 | 0            | 0 | 0            | 0 | -0.62742581 |
| 0 | 0            | 0 | 0.14376168 | 0 | 0            | 0 | 0.002414562  | 0 | 0           |
| 0 | -0.079126629 | 0 | 0.15059485 | 0 | 0            | 0 | 0            | 0 | -0.16690075 |
| 0 | -0.085022584 | 0 | 0.14277377 | 0 | 0            | 0 | 0.002798685  | 0 | -0.16029791 |
| 0 | 0            | 0 | 0          | 0 | 0.013362944  | 0 | 0            | 0 | 0           |
| 0 | -0.30979743  | 0 | 0          | 0 | -0.22228412  | 0 | 0            | 0 | -0.58909353 |
| 0 | 0            | 0 | 0.13669577 | 0 | 0            | 0 | -0.055338275 | 0 | -0.23448467 |
| 0 | -0.086018334 | 0 | 0.14763921 | 0 | 0            | 0 | 0.020758905  | 0 | 0           |
| 0 | 0            | 0 | 0          | 0 | 0            | 0 | -0.062853877 | 0 | 0           |
| 0 | -0.084744836 | 0 | 0.14898188 | 0 | 0            | 0 | 0            | 0 | 0           |
| 0 | -0.089964789 | 0 | 0.14203518 | 0 | 0            | 0 | 0.004131876  | 0 | 0           |
| 0 | 0            | 0 | 0.12959807 | 0 | 0            | 0 | 0            | 0 | -0.62714674 |
| 0 | 0            | 0 | 0.18023668 | 0 | 0            | 0 | 0.019373661  | 0 | -0.62706121 |
| 0 | 0            | 0 | 0          | 0 | 0.010143567  | 0 | 0            | 0 | -0.23920209 |
| 0 | -0.32065901  | 0 | 0          | 0 | -0.23177205  | 0 | 0.05916807   | 0 | 0           |
| 0 | 0            | 0 | 0          | 0 | 0.13589778   | 0 | 0            | 0 | -0.25780568 |
| 0 | 0            | 0 | 0.18108024 | 0 | 0            | 0 | 0            | 0 | -0.62715578 |
| 0 | -0.31309343  | 0 | 0          | 0 | -0.22575833  | 0 | 0.057939034  | 0 | 0.04018517  |
| 0 | 0            | 0 | 0.39525307 | 0 | -0.32476541  | 0 | 0.10416527   | 0 | 0           |
| 0 | 0            | 0 | 0          | 0 | -0.008901275 | 0 | 0            | 0 | -0.62862072 |
| 0 | -0.28662244  | 0 | 0          | 0 | -0.20494911  | 0 | 0.054545637  | 0 | 0           |
| 0 | 0            | 0 | 0.13775662 | 0 | 0            | 0 | -0.05608252  | 0 | 0           |
| 0 | 0            | 0 | 0          | 0 | 0.14184931   | 0 | 0            | 0 | -0.62833143 |
| 0 | 0            | 0 | 0.17072771 | 0 | 0            | 0 | -0.021386995 | 0 | -0.62706625 |
| 0 | -0.31760028  | 0 | 0          | 0 | -0.22803812  | 0 | 0            | 0 | 0           |
| 0 | -0.31066167  | 0 | 0          | 0 | -0.22254918  | 0 | 0            | 0 | 0.034195473 |
| 0 | 0            | 0 | 0.18040468 | 0 | 0            | 0 | 0.015951221  | 0 | -0.23341939 |
| 0 | 0            | 0 | 0          | 0 | 0.010684472  | 0 | 0            | 0 | 0           |
| 0 | 0            | 0 | 0          | 0 | 0.054974412  | 0 | 0            | 0 | -0.6283788  |
| 0 | 0            | 0 | 0          | 0 | 0.096289355  | 0 | -0.054532455 | 0 | -0.2572583  |
| 0 | 0            | 0 | 0          | 0 | 0.13557469   | 0 | 0            | 0 | 0           |
| 0 | 0            | 0 | 0          | 0 | 0.14244517   | 0 | -0.00584774  | 0 | -0.25791479 |
| 0 | 0            | 0 | 0          | 0 | 0.14190469   | 0 | 0            | 0 | -0.25804297 |
| 0 | 0            | 0 | 0          | 0 | 0.09962288   | 0 | -0.055165733 | 0 | -0.62735605 |
| 0 | 0            | 0 | 0          | 0 | 0.070408779  | 0 | 0            | 0 | -0.24741074 |
| 0 | 0            | 0 | 0.18120927 | 0 | 0            | 0 | 0.013290654  | 0 | 0           |
| 0 | 0            | 0 | 0          | 0 | 0.097595587  | 0 | -0.056129105 | 0 | 0           |

|   |             |   |            |   |              |   |              |              |
|---|-------------|---|------------|---|--------------|---|--------------|--------------|
| 0 | 0           | 0 | 0          | 0 | 0.073684408  | 0 | 0            | -0.62852602  |
| 0 | 0           | 0 | 0          | 0 | 0.10395528   | 0 | -0.051562833 | -0.25377342  |
| 0 | 0           | 0 | 0          | 0 | 0.14244347   | 0 | -0.00919614  | 0            |
| 0 | 0           | 0 | 0          | 0 | 0.14159862   | 0 | 0            | 0            |
| 0 | 0           | 0 | 0          | 0 | 0.071252887  | 0 | 0            | 0            |
| 0 | 0           | 0 | 0          | 0 | 0.13384299   | 0 | 0            | -0.62851969  |
| 0 | 0           | 0 | 0          | 0 | 0.10543318   | 0 | -0.052679452 | 0            |
| 0 | 0           | 0 | 0          | 0 | 0            | 0 | 0            | -0.62864104  |
| 0 | 0           | 0 | 0          | 0 | 0            | 0 | 0.035038193  | -0.62763226  |
| 0 | 0           | 0 | 0          | 0 | 0.095984013  | 0 | -0.046063956 | -0.62737962  |
| 0 | 0           | 0 | 0          | 0 | 0.13409614   | 0 | -0.002929659 | -0.25827552  |
| 0 | 0           | 0 | 0          | 0 | 0.13382885   | 0 | 0            | -0.25864919  |
| 0 | 0           | 0 | 0          | 0 | 0            | 0 | 0            | -0.62854279  |
| 0 | 0           | 0 | 0          | 0 | 0.074418793  | 0 | 0            | -0.62856293  |
| 0 | -0.1740177  | 0 | 0.1197307  | 0 | 0            | 0 | 0.037414845  | 0            |
| 0 | 0           | 0 | 0          | 0 | 0            | 0 | 0.012445885  | -0.25249808  |
| 0 | 0           | 0 | 0          | 0 | 0            | 0 | 0            | -0.25248481  |
| 0 | 0           | 0 | 0          | 0 | 0            | 0 | 0.032072434  | -0.25305984  |
| 0 | -0.33928125 | 0 | 0.34167109 | 0 | -0.43940793  | 0 | 0            | 0            |
| 0 | 0           | 0 | 0          | 0 | 0.099927845  | 0 | -0.043370504 | -0.25472418  |
| 0 | -0.33294979 | 0 | 0.34061089 | 0 | -0.43342748  | 0 | 0            | 0.12305225   |
| 0 | 0           | 0 | 0          | 0 | 0.13408847   | 0 | -0.006278091 | 0            |
| 0 | 0           | 0 | 0          | 0 | 0.13349172   | 0 | 0            | 0            |
| 0 | 0           | 0 | 0          | 0 | 0            | 0 | 0.015940523  | -0.62858958  |
| 0 | 0           | 0 | 0          | 0 | 0            | 0 | 0            | -0.62863417  |
| 0 | 0           | 0 | 0          | 0 | 0            | 0 | 0.034478608  | -0.62879424  |
| 0 | 0           | 0 | 0          | 0 | 0            | 0 | 0.009137905  | 0            |
| 0 | 0           | 0 | 0          | 0 | 0            | 0 | 0            | 0            |
| 0 | 0           | 0 | 0          | 0 | 0            | 0 | 0.032196248  | 0            |
| 0 | 0           | 0 | 0          | 0 | 0.1014167    | 0 | -0.044489639 | 0            |
| 0 | -0.21699494 | 0 | 0          | 0 | -0.087984977 | 0 | 0.18729634   | -0.62743596  |
| 0 | 0           | 0 | 0          | 0 | 0            | 0 | 0.015853925  | -0.62728568  |
| 0 | 0           | 0 | 0          | 0 | 0            | 0 | 0            | -0.62746348  |
| 0 | 0           | 0 | 0          | 0 | -0.000435166 | 0 | 0            | -0.62747505  |
| 0 | -0.24783985 | 0 | 0.32658917 | 0 | -0.35924282  | 0 | 0            | 0            |
| 0 | 0           | 0 | 0          | 0 | 0            | 0 | 0.011616293  | -0.25213903  |
| 0 | -0.3415561  | 0 | 0.34348086 | 0 | -0.44992773  | 0 | 0            | 0            |
| 0 | 0           | 0 | 0          | 0 | -0.028906515 | 0 | 0            | -0.62742544  |
| 0 | 0           | 0 | 0          | 0 | 0            | 0 | -0.031049753 | -0.62727897  |
| 0 | 0           | 0 | 0          | 0 | -0.024827108 | 0 | -0.029344803 | -0.62713011  |
| 0 | 0           | 0 | 0          | 0 | 0            | 0 | 0.013761574  | -0.25532799  |
| 0 | 0           | 0 | 0          | 0 | -0.000104092 | 0 | 0            | -0.25593948  |
| 0 | 0           | 0 | 0          | 0 | -0.000396288 | 0 | 0.011785747  | -0.25843294  |
| 0 | -0.22123128 | 0 | 0          | 0 | -0.093694786 | 0 | 0.16822381   | -0.059185941 |
| 0 | -0.25335432 | 0 | 0.32635139 | 0 | -0.35785428  | 0 | 0            | 0            |
| 0 | -0.33525769 | 0 | 0.34243718 | 0 | -0.44401503  | 0 | 0            | 0.12523971   |
| 0 | -0.24902698 | 0 | 0.32671572 | 0 | -0.35376607  | 0 | -0.014401033 | 0            |

|   |             |   |            |   |              |   |              |             |
|---|-------------|---|------------|---|--------------|---|--------------|-------------|
| 0 | -0.2476913  | 0 | 0.33433776 | 0 | -0.36015294  | 0 | 0            | 0           |
| 0 | -0.22833604 | 0 | 0          | 0 | -0.097220861 | 0 | 0.17214136   | 0           |
| 0 | 0           | 0 | 0          | 0 | 0            | 0 | 0.00861917   | 0           |
| 0 | 0           | 0 | 0          | 0 | 0            | 0 | 0.017981434  | -0.6285846  |
| 0 | 0           | 0 | 0          | 0 | 0            | 0 | 0            | -0.62862791 |
| 0 | 0           | 0 | 0          | 0 | 0            | 0 | 0.039438314  | -0.62881227 |
| 0 | 0           | 0 | 0          | 0 | -0.020686744 | 0 | -0.022367898 | -0.2519648  |
| 0 | -0.16781473 | 0 | 0          | 0 | 0            | 0 | 0.049291952  | -0.62703913 |
| 0 | 0           | 0 | 0          | 0 | 0            | 0 | 0.010773305  | 0           |
| 0 | 0           | 0 | 0          | 0 | -0.000192641 | 0 | 0            | 0           |
| 0 | 0           | 0 | 0          | 0 | -0.000402059 | 0 | 0.008459177  | 0           |
| 0 | -0.16716412 | 0 | 0          | 0 | 0            | 0 | 0            | -0.62687307 |
| 0 | -0.23068316 | 0 | 0.32143353 | 0 | -0.28692836  | 0 | 0.054338191  | 0           |
| 0 | -0.2346623  | 0 | 0.32423788 | 0 | -0.27225881  | 0 | 0            | 0           |
| 0 | 0           | 0 | 0          | 0 | 0            | 0 | 0.013628034  | -0.2528768  |
| 0 | -0.16514971 | 0 | 0          | 0 | 0            | 0 | 0.10030364   | -0.62733642 |
| 0 | -0.23394336 | 0 | 0.2905824  | 0 | -0.25255249  | 0 | 0            | 0           |
| 0 | -0.27191344 | 0 | 0.32708884 | 0 | -0.30748133  | 0 | 0.072130224  | 0           |
| 0 | 0           | 0 | 0          | 0 | -0.01975523  | 0 | -0.023560016 | 0           |
| 0 | -0.23575202 | 0 | 0.32446494 | 0 | -0.24704023  | 0 | 0            | -0.60155686 |
| 0 | -0.26570977 | 0 | 0.32618094 | 0 | -0.30338133  | 0 | 0.068679429  | 0.054614449 |
| 0 | -0.24082808 | 0 | 0.32241249 | 0 | -0.29514096  | 0 | 0.040742159  | 0           |
| 0 | -0.24435737 | 0 | 0.29896224 | 0 | -0.2712525   | 0 | 0            | 0           |
| 0 | -0.16682427 | 0 | 0          | 0 | 0            | 0 | 0.044121051  | -0.10605959 |
| 0 | -0.26707666 | 0 | 0.28820745 | 0 | -0.2590822   | 0 | 0            | 0           |
| 0 | -0.25748393 | 0 | 0.32752601 | 0 | -0.27687647  | 0 | 0            | 0           |
| 0 | -0.23830656 | 0 | 0.30063664 | 0 | -0.2784038   | 0 | 0.040872443  | 0           |
| 0 | -0.23679628 | 0 | 0.3256851  | 0 | -0.25011849  | 0 | 0            | 0           |
| 0 | -0.25280808 | 0 | 0.32672378 | 0 | -0.27542481  | 0 | 0            | 0.028035476 |
| 0 | -0.23223431 | 0 | 0.32486762 | 0 | -0.24890897  | 0 | 0            | 0.019703174 |
| 0 | -0.26178089 | 0 | 0.28868386 | 0 | -0.25753339  | 0 | 0            | 0.042249978 |
| 0 | -0.25426189 | 0 | 0.32801939 | 0 | -0.3674089   | 0 | 0            | 0           |
| 0 | -0.24979441 | 0 | 0.32824977 | 0 | -0.36337488  | 0 | -0.011825682 | 0           |
| 0 | -0.248629   | 0 | 0.33486902 | 0 | -0.36886983  | 0 | 0            | 0           |
| 0 | -0.17138083 | 0 | 0          | 0 | 0            | 0 | 0.043422543  | 0           |
| 0 | 0           | 0 | 0          | 0 | 0            | 0 | 0.010624129  | 0           |
| 0 | -0.27030867 | 0 | 0.32796054 | 0 | -0.31027743  | 0 | 0.079682111  | 0           |
| 0 | -0.24078449 | 0 | 0.32353676 | 0 | -0.29937185  | 0 | 0.048167354  | 0           |
| 0 | -0.26403278 | 0 | 0.32704713 | 0 | -0.30617069  | 0 | 0.076225387  | 0.052717193 |
| 0 | -0.24494077 | 0 | 0.29598517 | 0 | -0.27107987  | 0 | 0            | 0           |
| 0 | -0.23855122 | 0 | 0.29870951 | 0 | -0.28139925  | 0 | 0.047318827  | 0           |
| 0 | -0.23081727 | 0 | 0.32518154 | 0 | -0.24339746  | 0 | 0            | -0.6069448  |
| 0 | -0.26514338 | 0 | 0.28477802 | 0 | -0.2567765   | 0 | 0            | 0           |
| 0 | -0.254077   | 0 | 0.32835056 | 0 | -0.27555033  | 0 | 0            | 0           |
| 0 | -0.25981024 | 0 | 0.28526157 | 0 | -0.25523955  | 0 | 0            | 0.039075851 |
| 0 | -0.24934805 | 0 | 0.32753237 | 0 | -0.27408521  | 0 | 0            | 0.023195914 |
| 0 | -0.14066911 | 0 | 0          | 0 | 0.020053143  | 0 | 0            | -0.62719139 |

|   |             |   |            |   |             |   |              |   |              |
|---|-------------|---|------------|---|-------------|---|--------------|---|--------------|
| 0 | 0           | 0 | 0          | 0 | 0.10799645  | 0 | 0            | 0 | 0            |
| 0 | -0.32905452 | 0 | 0.36355104 | 0 | -0.57117259 | 0 | 0            | 0 | -0.50288349  |
| 0 | 0           | 0 | 0          | 0 | 0.1010318   | 0 | 0            | 0 | 0            |
| 0 | 0           | 0 | 0          | 0 | 0           | 0 | 0            | 0 | 0            |
| 0 | 0           | 0 | 0          | 0 | 0           | 0 | 0.044564739  | 0 | -0.62857866  |
| 0 | 0           | 0 | 0          | 0 | 0.005892257 | 0 | 0.043027066  | 0 | -0.62855372  |
| 0 | -0.33718513 | 0 | 0.36323811 | 0 | -0.57757618 | 0 | 0.029941943  | 0 | 0            |
| 0 | -0.33597563 | 0 | 0.36480049 | 0 | -0.57744054 | 0 | 0            | 0 | 0            |
| 0 | -0.3361309  | 0 | 0.35986675 | 0 | -0.57323122 | 0 | 0            | 0 | 0            |
| 0 | 0           | 0 | 0          | 0 | 0.020147833 | 0 | 0.070537527  | 0 | -0.62905601  |
| 0 | 0           | 0 | 0          | 0 | 0.007038411 | 0 | 0            | 0 | -0.62739508  |
| 0 | -0.3308789  | 0 | 0.36229139 | 0 | -0.57156804 | 0 | 0.027987675  | 0 | 0.12392769   |
| 0 | -0.33003215 | 0 | 0.36378286 | 0 | -0.57169427 | 0 | 0            | 0 | 0.12046559   |
| 0 | -0.3301766  | 0 | 0.35878261 | 0 | -0.56741972 | 0 | 0            | 0 | 0.121965     |
| 0 | 0           | 0 | 0          | 0 | 0           | 0 | -0.027307651 | 0 | 0            |
| 0 | 0           | 0 | 0          | 0 | 0.022377063 | 0 | 0            | 0 | 0            |
| 0 | 0           | 0 | 0          | 0 | 0.006259438 | 0 | 0.039810609  | 0 | -0.25734535  |
| 0 | 0           | 0 | 0.16866904 | 0 | 0           | 0 | 0.029930106  | 0 | 0            |
| 0 | 0           | 0 | 0          | 0 | 0.10808253  | 0 | -0.009459667 | 0 | 0            |
| 0 | 0           | 0 | 0          | 0 | 0.054516968 | 0 | -0.060591342 | 0 | 0            |
| 0 | 0           | 0 | 0          | 0 | 0.099029951 | 0 | 0            | 0 | 0            |
| 0 | 0           | 0 | 0          | 0 | 0           | 0 | 0.014057354  | 0 | 0            |
| 0 | 0           | 0 | 0          | 0 | 0.006240076 | 0 | 0.036789818  | 0 | 0            |
| 0 | 0           | 0 | 0          | 0 | 0           | 0 | 0.002916936  | 0 | 0            |
| 0 | -0.24965052 | 0 | 0.34845445 | 0 | -0.49480889 | 0 | 0.019597396  | 0 | 0            |
| 0 | -0.25074169 | 0 | 0.3437357  | 0 | -0.49114171 | 0 | 0            | 0 | 0            |
| 0 | -0.24740768 | 0 | 0.34216138 | 0 | -0.48758014 | 0 | 0.021525091  | 0 | 0            |
| 0 | -0.22535012 | 0 | 0.13597523 | 0 | 0           | 0 | 0            | 0 | 0            |
| 0 | -0.19440734 | 0 | 0.14898811 | 0 | 0           | 0 | 0            | 0 | -0.05019854  |
| 0 | -0.20050312 | 0 | 0.14688045 | 0 | 0           | 0 | 0            | 0 | 0            |
| 0 | -0.17278544 | 0 | 0.19065683 | 0 | 0           | 0 | 0            | 0 | -0.6268732   |
| 0 | -0.22664029 | 0 | 0.1393287  | 0 | 0           | 0 | -0.0307382   | 0 | 0            |
| 0 | -0.22618366 | 0 | 0.13781698 | 0 | 0           | 0 | 0            | 0 | 0            |
| 0 | 0           | 0 | 0          | 0 | 0.048759383 | 0 | -0.053295193 | 0 | 0            |
| 0 | -0.16759152 | 0 | 0.19043435 | 0 | 0           | 0 | 0            | 0 | -0.069164856 |
| 0 | 0           | 0 | 0          | 0 | 0.032921123 | 0 | -0.093729551 | 0 | 0            |
| 0 | 0           | 0 | 0          | 0 | 0           | 0 | 0.016081585  | 0 | 0            |
| 0 | 0           | 0 | 0          | 0 | 0.099119777 | 0 | -0.006622762 | 0 | 0            |
| 0 | -0.17340071 | 0 | 0.18912794 | 0 | 0           | 0 | 0            | 0 | 0            |
| 0 | -0.17064282 | 0 | 0.19331205 | 0 | 0           | 0 | -0.028908584 | 0 | -0.066312127 |
| 0 | -0.1862778  | 0 | 0.16998005 | 0 | 0           | 0 | -0.090343679 | 0 | -0.62639687  |
| 0 | -0.17159543 | 0 | 0.19106152 | 0 | 0           | 0 | 0            | 0 | -0.066920272 |
| 0 | -0.17618649 | 0 | 0.19207909 | 0 | 0           | 0 | -0.029357355 | 0 | 0            |
| 0 | -0.23136605 | 0 | 0.12578598 | 0 | 0           | 0 | -0.10518951  | 0 | 0            |
| 0 | -0.20992026 | 0 | 0.18254722 | 0 | 0           | 0 | -0.026011777 | 0 | 0            |
| 0 | -0.17731459 | 0 | 0.18976587 | 0 | 0           | 0 | 0            | 0 | 0            |
| 0 | -0.20952888 | 0 | 0.18086635 | 0 | 0           | 0 | 0            | 0 | 0            |

|   |             |   |            |   |              |   |              |   |              |
|---|-------------|---|------------|---|--------------|---|--------------|---|--------------|
| 0 | -0.20328821 | 0 | 0.13768077 | 0 | 0            | 0 | -0.10804928  | 0 | -0.045588342 |
| 0 | -0.18091029 | 0 | 0.17063487 | 0 | 0            | 0 | -0.092937963 | 0 | -0.061452404 |
| 0 | -0.20843346 | 0 | 0.13598803 | 0 | 0            | 0 | -0.10769022  | 0 | 0            |
| 0 | -0.22880417 | 0 | 0.12902527 | 0 | 0            | 0 | -0.096652804 | 0 | 0            |
| 0 | -0.18573893 | 0 | 0.16988959 | 0 | 0            | 0 | -0.092202838 | 0 | 0            |
| 0 | -0.21146287 | 0 | 0.18371732 | 0 | 0            | 0 | -0.027019671 | 0 | 0            |
| 0 | -0.18325139 | 0 | 0.17275954 | 0 | 0            | 0 | -0.088305677 | 0 | -0.05657489  |
| 0 | -0.21463219 | 0 | 0.16561442 | 0 | 0            | 0 | -0.078183649 | 0 | 0            |
| 0 | -0.33242491 | 0 | 0          | 0 | -0.11275406  | 0 | 0            | 0 | -0.56477364  |
| 0 | -0.18799507 | 0 | 0.17206287 | 0 | 0            | 0 | -0.087231585 | 0 | 0            |
| 0 | -0.33394223 | 0 | 0          | 0 | -0.11628552  | 0 | 0            | 0 | 0            |
| 0 | -0.19421566 | 0 | 0.1454403  | 0 | 0            | 0 | 0            | 0 | -0.051598615 |
| 0 | -0.32879464 | 0 | 0          | 0 | -0.11452613  | 0 | 0            | 0 | 0.056317805  |
| 0 | -0.2003404  | 0 | 0.14333846 | 0 | 0            | 0 | 0            | 0 | 0            |
| 0 | -0.17160322 | 0 | 0.18911436 | 0 | 0            | 0 | 0            | 0 | -0.62687274  |
| 0 | -0.22743028 | 0 | 0.1354402  | 0 | 0            | 0 | -0.028869901 | 0 | 0            |
| 0 | -0.227086   | 0 | 0.13398179 | 0 | 0            | 0 | 0            | 0 | 0            |
| 0 | 0           | 0 | 0.33403152 | 0 | -0.23291464  | 0 | 0            | 0 | -0.62719518  |
| 0 | 0           | 0 | 0.36747632 | 0 | -0.2241189   | 0 | 0            | 0 | -0.1886406   |
| 0 | -0.29271775 | 0 | 0          | 0 | -0.096550716 | 0 | -0.010935205 | 0 | 0            |
| 0 | -0.29228545 | 0 | 0          | 0 | -0.095631052 | 0 | 0            | 0 | 0            |
| 0 | -0.2957039  | 0 | 0          | 0 | -0.10557263  | 0 | 0            | 0 | 0            |
| 0 | -0.34884102 | 0 | 0          | 0 | -0.13450067  | 0 | 0            | 0 | 0            |
| 0 | -0.34013115 | 0 | 0          | 0 | -0.11808527  | 0 | 0            | 0 | 0            |
| 0 | -0.33958302 | 0 | 0          | 0 | -0.11786542  | 0 | 0.005385021  | 0 | 0            |
| 0 | 0           | 0 | 0.36948908 | 0 | -0.22135323  | 0 | 0            | 0 | -0.62704784  |
| 0 | -0.34168258 | 0 | 0          | 0 | -0.1288948   | 0 | 0            | 0 | 0.069068938  |
| 0 | -0.33497448 | 0 | 0          | 0 | -0.11624813  | 0 | 0            | 0 | 0.060244205  |
| 0 | -0.33346047 | 0 | 0          | 0 | -0.11420054  | 0 | 0.002483457  | 0 | 0.060922599  |
| 0 | 0           | 0 | 0.33217381 | 0 | -0.19794091  | 0 | -0.043781691 | 0 | -0.1959787   |
| 0 | -0.20538107 | 0 | 0.12998674 | 0 | 0            | 0 | 0            | 0 | -0.62666701  |
| 0 | 0           | 0 | 0.32846312 | 0 | -0.18385303  | 0 | 0            | 0 | -0.19622909  |
| 0 | -0.18439093 | 0 | 0.16969816 | 0 | 0            | 0 | -0.084335162 | 0 | -0.62636543  |
| 0 | 0           | 0 | 0.3283926  | 0 | -0.17774316  | 0 | 0            | 0 | -0.62706701  |
| 0 | 0           | 0 | 0.3693561  | 0 | -0.22524655  | 0 | 0            | 0 | 0            |
| 0 | -0.16949314 | 0 | 0.1916271  | 0 | 0            | 0 | -0.026945925 | 0 | -0.068302402 |
| 0 | 0           | 0 | 0.33243955 | 0 | -0.19506656  | 0 | -0.044288135 | 0 | -0.6269169   |
| 0 | -0.17044802 | 0 | 0.1894995  | 0 | 0            | 0 | 0            | 0 | -0.069165281 |
| 0 | 0           | 0 | 0.33273279 | 0 | -0.22245478  | 0 | 0            | 0 | -0.18938377  |
| 0 | -0.2028544  | 0 | 0.134647   | 0 | 0            | 0 | -0.10331073  | 0 | -0.047013013 |
| 0 | -0.2268769  | 0 | 0.10551456 | 0 | 0            | 0 | 0            | 0 | 0            |
| 0 | -0.29659449 | 0 | 0          | 0 | -0.095640574 | 0 | -0.015764302 | 0 | 0            |
| 0 | -0.17508448 | 0 | 0.19039841 | 0 | 0            | 0 | -0.027421346 | 0 | 0            |
| 0 | -0.29562641 | 0 | 0          | 0 | -0.092935207 | 0 | 0            | 0 | 0            |
| 0 | -0.29350267 | 0 | 0          | 0 | -0.090550677 | 0 | -0.01038728  | 0 | 0            |
| 0 | -0.20044377 | 0 | 0.12947871 | 0 | 0            | 0 | 0            | 0 | -0.034161854 |
| 0 | -0.21786431 | 0 | 0.10480936 | 0 | 0            | 0 | 0            | 0 | -0.62668436  |

|   |             |   |             |   |             |             |              |              |
|---|-------------|---|-------------|---|-------------|-------------|--------------|--------------|
| 0 | -0.20805723 | 0 | 0.13295127  | 0 | 0           | -0.10295388 | 0            | 0            |
| 0 | 0           | 0 | 0           | 0 | 0.12003307  | 0           | 0            | 0            |
| 0 | -0.17620228 | 0 | 0.18820809  | 0 | 0           | 0           | 0            | 0            |
| 0 | -0.20527542 | 0 | 0.129282    | 0 | 0           | 0           | 0            | 0            |
| 0 | 0           | 0 | 0.33356983  | 0 | -0.19828783 | 0           | -0.044829273 | 0            |
| 0 | 0           | 0 | 0.33003874  | 0 | -0.18568893 | 0           | 0            | 0            |
| 0 | 0           | 0 | 0.36125902  | 0 | -0.20252538 | 0           | -0.025559863 | -0.1908048   |
| 0 | -0.22957118 | 0 | 0.12561712  | 0 | 0           | 0           | -0.092359854 | 0            |
| 0 | -0.32976015 | 0 | 0           | 0 | -0.11251428 | 0           | 0            | -0.56788462  |
| 0 | 0           | 0 | 0.3330412   | 0 | -0.21972856 | 0           | 0            | -0.62717996  |
| 0 | 0           | 0 | 0           | 0 | 0.09649263  | 0           | -0.001037017 | 0            |
| 0 | 0           | 0 | 0.36117768  | 0 | -0.2044196  | 0           | 0            | -0.19020044  |
| 0 | -0.27156418 | 0 | 0           | 0 | 0           | 0           | 0            | -0.62565701  |
| 0 | 0           | 0 | 0.36847321  | 0 | -0.21984024 | 0           | 0            | -0.18785802  |
| 0 | -0.21435734 | 0 | 0.11140645  | 0 | 0           | 0           | 0            | -0.022630523 |
| 0 | -0.21985887 | 0 | 0.1097714   | 0 | 0           | 0           | 0            | 0            |
| 0 | 0           | 0 | 0.33415821  | 0 | -0.22297224 | 0           | 0            | 0            |
| 0 | -0.22444129 | 0 | 0.10010248  | 0 | 0           | 0           | 0            | -0.62650524  |
| 0 | -0.21176374 | 0 | 0.18178585  | 0 | 0           | 0           | -0.025155953 | 0            |
| 0 | 0           | 0 | 0.32934053  | 0 | -0.17595547 | 0           | -0.028835853 | -0.19679359  |
| 0 | 0           | 0 | 0.33190517  | 0 | -0.19194332 | 0           | -0.045317811 | -0.1951713   |
| 0 | -0.18149602 | 0 | 0.17226691  | 0 | 0           | 0           | -0.083207733 | -0.059322391 |
| 0 | 0           | 0 | 0.32804162  | 0 | -0.17727495 | 0           | 0            | -0.19613897  |
| 0 | -0.27024235 | 0 | 0           | 0 | 0           | 0           | -0.018061696 | 0            |
| 0 | -0.26695319 | 0 | 0           | 0 | 0           | 0           | 0            | -0.005150202 |
| 0 | -0.2716791  | 0 | 0           | 0 | 0           | 0           | 0            | 0            |
| 0 | -0.27003431 | 0 | 0           | 0 | 0           | 0           | 0            | 0            |
| 0 | 0           | 0 | 0.36280896  | 0 | -0.20296174 | 0           | -0.026472595 | 0            |
| 0 | -0.18630043 | 0 | 0.17157616  | 0 | 0           | 0           | -0.082139371 | 0            |
| 0 | 0           | 0 | 0.36381602  | 0 | -0.20712117 | 0           | 0            | 0            |
| 0 | 0           | 0 | 0.37002309  | 0 | -0.22035741 | 0           | 0            | 0            |
| 0 | -0.35142274 | 0 | 0           | 0 | -0.14376822 | 0           | 0            | 0            |
| 0 | -0.23666414 | 0 | 0.28277813  | 0 | -0.36970396 | 0           | 0.12484829   | 0            |
| 0 | -0.21960099 | 0 | 0.099653103 | 0 | 0           | 0           | 0            | -0.033582186 |
| 0 | -0.33835068 | 0 | 0           | 0 | -0.11913658 | 0           | 0            | 0            |
| 0 | -0.33914606 | 0 | 0           | 0 | -0.12180728 | 0           | 0.011773131  | 0            |
| 0 | -0.22531339 | 0 | 0.097911756 | 0 | 0           | 0           | 0            | 0            |
| 0 | 0           | 0 | 0.33097192  | 0 | -0.17760866 | 0           | -0.031290169 | 0            |
| 0 | 0           | 0 | 0           | 0 | 0.12425971  | 0           | 0.02233887   | 0            |
| 0 | -0.27354447 | 0 | 0           | 0 | 0           | 0           | -0.072872148 | -0.62476218  |
| 0 | -0.34429754 | 0 | 0           | 0 | -0.13821824 | 0           | 0            | 0.071239272  |
| 0 | 0           | 0 | 0.33326434  | 0 | -0.19207978 | 0           | -0.045892749 | 0            |
| 0 | -0.24974969 | 0 | 0.27738628  | 0 | -0.36918587 | 0           | 0.14415005   | 0            |
| 0 | -0.33315214 | 0 | 0           | 0 | -0.1173033  | 0           | 0            | 0.057229142  |
| 0 | 0           | 0 | 0.32963726  | 0 | -0.17912823 | 0           | 0            | 0            |
| 0 | -0.33296306 | 0 | 0           | 0 | -0.1181353  | 0           | 0.008868702  | 0.060098429  |
| 0 | 0           | 0 | 0.36527931  | 0 | -0.21987606 | 0           | 0            | -0.62701018  |

|   |             |   |             |   |              |   |              |   |              |
|---|-------------|---|-------------|---|--------------|---|--------------|---|--------------|
| 0 | -0.24282073 | 0 | 0.2773719   | 0 | -0.3649004   | 0 | 0.14087409   | 0 | 0.02183316   |
| 0 | -0.27638276 | 0 | 0           | 0 | 0            | 0 | -0.018652601 | 0 | 0            |
| 0 | -0.27300338 | 0 | 0           | 0 | 0            | 0 | -0.019495137 | 0 | 0            |
| 0 | -0.27183193 | 0 | 0           | 0 | 0            | 0 | -0.018761492 | 0 | -0.000750645 |
| 0 | -0.27623951 | 0 | 0           | 0 | 0            | 0 | 0            | 0 | 0            |
| 0 | -0.27161179 | 0 | 0           | 0 | 0            | 0 | 0            | 0 | -0.001359882 |
| 0 | -0.26959365 | 0 | 0           | 0 | 0            | 0 | -0.069732395 | 0 | 0            |
| 0 | -0.26941429 | 0 | 0           | 0 | 0            | 0 | -0.075657466 | 0 | -0.004162395 |
| 0 | -0.27365489 | 0 | 0           | 0 | 0            | 0 | -0.075530335 | 0 | 0            |
| 0 | -0.20238076 | 0 | 0.1318618   | 0 | 0            | 0 | 0            | 0 | -0.62667405  |
| 0 | 0           | 0 | 0.33331952  | 0 | -0.19958259  | 0 | -0.035258837 | 0 | -0.62692356  |
| 0 | 0           | 0 | 0.33032819  | 0 | -0.18785639  | 0 | 0            | 0 | -0.62705206  |
| 0 | 0           | 0 | 0           | 0 | 0.11809295   | 0 | 0.012622642  | 0 | 0            |
| 0 | -0.29696525 | 0 | 0           | 0 | -0.10039619  | 0 | -0.009592719 | 0 | 0            |
| 0 | -0.29686098 | 0 | 0           | 0 | -0.10131687  | 0 | 0            | 0 | 0            |
| 0 | -0.29456805 | 0 | 0           | 0 | -0.099041969 | 0 | -0.00792791  | 0 | 0            |
| 0 | 0           | 0 | 0.33386068  | 0 | -0.21982508  | 0 | 0            | 0 | -0.627172    |
| 0 | -0.20898108 | 0 | 0.34131647  | 0 | -0.38051462  | 0 | 0.18376735   | 0 | -0.6234402   |
| 0 | -0.269545   | 0 | 0           | 0 | 0            | 0 | 0            | 0 | -3.1691672   |
| 0 | 0           | 0 | 0.35913628  | 0 | -0.20590768  | 0 | -0.018768669 | 0 | -0.19167147  |
| 0 | -0.27735081 | 0 | 0           | 0 | 0            | 0 | -0.069266085 | 0 | 0            |
| 0 | -0.27319834 | 0 | 0           | 0 | 0            | 0 | -0.06984663  | 0 | 0.002354152  |
| 0 | 0           | 0 | 0.36208718  | 0 | -0.2136357   | 0 | 0            | 0 | -0.19049837  |
| 0 | 0           | 0 | 0.36502784  | 0 | -0.21976992  | 0 | 0            | 0 | -0.18991129  |
| 0 | -0.27020483 | 0 | 0           | 0 | 0            | 0 | 0            | 0 | -0.62724135  |
| 0 | -0.22319414 | 0 | 0.098685134 | 0 | 0            | 0 | 0            | 0 | -0.62650398  |
| 0 | -0.2133805  | 0 | 0.10940778  | 0 | 0            | 0 | 0            | 0 | -0.025195759 |
| 0 | 0           | 0 | 0.24354577  | 0 | 0            | 0 | 0            | 0 | -0.62730069  |
| 0 | -0.27167097 | 0 | 0           | 0 | 0            | 0 | 0            | 0 | -0.61430075  |
| 0 | 0           | 0 | 0.33114933  | 0 | -0.18617033  | 0 | -0.026013282 | 0 | -0.19686308  |
| 0 | -0.21892375 | 0 | 0.10777382  | 0 | 0            | 0 | 0            | 0 | 0            |
| 0 | 0           | 0 | 0.3328613   | 0 | -0.19688836  | 0 | -0.037178857 | 0 | -0.19599353  |
| 0 | 0           | 0 | 0.32997633  | 0 | -0.18739692  | 0 | 0            | 0 | -0.19638059  |
| 0 | -0.22431494 | 0 | 0.34430753  | 0 | -0.39626406  | 0 | 0.16702957   | 0 | 0            |
| 0 | -0.21769924 | 0 | 0.34318097  | 0 | -0.39171475  | 0 | 0.16301074   | 0 | -0.002511044 |
| 0 | 0           | 0 | 0.36069059  | 0 | -0.20633946  | 0 | -0.019686293 | 0 | 0            |
| 0 | 0           | 0 | 0           | 0 | 0            | 0 | 0.038079743  | 0 | 0            |
| 0 | 0           | 0 | 0.36471417  | 0 | -0.21633233  | 0 | 0            | 0 | 0            |
| 0 | 0           | 0 | 0.36657065  | 0 | -0.22028066  | 0 | 0            | 0 | 0            |
| 0 | -0.27194782 | 0 | 0           | 0 | 0            | 0 | 0            | 0 | 0            |
| 0 | -0.26743192 | 0 | 0           | 0 | 0            | 0 | 0            | 0 | 0.006618195  |
| 0 | 0           | 0 | 0.33277739  | 0 | -0.1878269   | 0 | -0.028464271 | 0 | 0            |
| 0 | 0           | 0 | 0.33423077  | 0 | -0.19702113  | 0 | -0.037777126 | 0 | 0            |
| 0 | 0           | 0 | 0.24569011  | 0 | 0            | 0 | -0.034075537 | 0 | -0.21638412  |
| 0 | 0           | 0 | 0.33156481  | 0 | -0.18925213  | 0 | 0            | 0 | 0            |
| 0 | 0           | 0 | 0.24795861  | 0 | 0            | 0 | -0.030871128 | 0 | -0.6270477   |
| 0 | -0.27223729 | 0 | 0           | 0 | 0            | 0 | -0.068872293 | 0 | -0.62719422  |

|   |             |   |            |              |             |              |   |              |
|---|-------------|---|------------|--------------|-------------|--------------|---|--------------|
| 0 | 0           | 0 | 0.23522145 | 0            | 0           | 0            | 0 | -0.21722385  |
| 0 | 0           | 0 | 0.2388172  | 0            | 0           | 0            | 0 | -0.6273728   |
| 0 | 0           | 0 | 0.24339236 | 0            | 0           | 0            | 0 | -0.21567958  |
| 0 | 0           | 0 | 0.24592032 | 0            | 0           | 0            | 0 | -0.6273114   |
| 0 | -0.27234886 | 0 | 0          | 0            | 0           | -0.017932596 | 0 | 0            |
| 0 | -0.27420118 | 0 | 0          | 0            | 0           | -0.017088325 | 0 | 0            |
| 0 | -0.26959779 | 0 | 0          | 0            | 0           | -0.017160944 | 0 | -0.003431231 |
| 0 | -0.26942902 | 0 | 0          | 0            | 0           | 0            | 0 | -0.004205815 |
| 0 | -0.27409862 | 0 | 0          | 0            | 0           | 0            | 0 | 0            |
| 0 | 0           | 0 | 0          | 0.11548104   | 0           | 0.025368047  | 0 | 0            |
| 0 | 0           | 0 | 0.24659285 | 0            | 0           | -0.036869846 | 0 | 0            |
| 0 | 0           | 0 | 0.23629195 | 0            | 0           | 0            | 0 | 0            |
| 0 | 0           | 0 | 0.2404796  | 0            | 0           | -0.036096864 | 0 | -0.21699922  |
| 0 | 0           | 0 | 0.24414124 | 0            | 0           | 0            | 0 | 0            |
| 0 | 0           | 0 | 0.24814677 | 0            | 0           | -0.035743047 | 0 | -0.21666725  |
| 0 | 0           | 0 | 0.23862999 | 0            | 0           | 0            | 0 | -0.21630011  |
| 0 | -0.27523295 | 0 | 0          | 0            | 0           | -0.065974773 | 0 | 0            |
| 0 | -0.27102056 | 0 | 0          | 0            | 0           | -0.066541729 | 0 | -0.000519336 |
| 0 | -0.26950251 | 0 | 0          | 0            | 0           | 0            | 0 | -0.6175469   |
| 0 | -0.20882619 | 0 | 0.25352138 | 0            | -0.29306171 | 0            | 0 | -0.035818146 |
| 0 | -0.21417813 | 0 | 0.25280345 | 0            | -0.29484898 | 0            | 0 | 0            |
| 0 | 0           | 0 | 0.24164349 | 0            | 0           | -0.038871044 | 0 | 0            |
| 0 | -0.19341343 | 0 | 0.23891101 | 0            | -0.25935729 | 0            | 0 | -0.62642748  |
| 0 | 0           | 0 | 0.24904053 | 0            | 0           | -0.038262906 | 0 | 0            |
| 0 | 0           | 0 | 0.23964626 | 0            | 0           | 0            | 0 | 0            |
| 0 | 0           | 0 | 0.21774073 | 0            | 0           | -0.13571633  | 0 | -0.62686633  |
| 0 | 0           | 0 | 0          | -0.016737031 | 0           | 0.040476747  | 0 | 0            |
| 0 | 0           | 0 | 0.22071255 | 0            | 0           | -0.12309222  | 0 | -0.21516963  |
| 0 | 0           | 0 | 0.24546377 | 0            | 0           | -0.028599999 | 0 | -0.62720147  |
| 0 | 0           | 0 | 0.22589119 | 0            | 0           | -0.13182943  | 0 | -0.2210938   |
| 0 | 0           | 0 | 0.22243559 | 0            | 0           | -0.12242625  | 0 | -0.62687977  |
| 0 | 0           | 0 | 0.23461331 | 0            | 0           | 0            | 0 | -0.62715995  |
| 0 | 0           | 0 | 0.24354617 | 0            | 0           | 0            | 0 | -0.62730602  |
| 0 | 0           | 0 | 0.22898591 | 0            | 0           | -0.13013514  | 0 | -0.62672605  |
| 0 | 0           | 0 | 0.22196405 | 0            | 0           | -0.12381968  | 0 | 0            |
| 0 | 0           | 0 | 0.22710427 | 0            | 0           | -0.13304836  | 0 | 0            |
| 0 | 0           | 0 | 0.22930902 | 0            | 0           | -0.12082381  | 0 | -0.21438889  |
| 0 | 0           | 0 | 0.23621386 | 0            | 0           | -0.034022188 | 0 | -0.21839238  |
| 0 | 0           | 0 | 0.24565014 | 0            | 0           | -0.033591956 | 0 | -0.21794783  |
| 0 | 0           | 0 | 0.23445837 | 0            | 0           | 0            | 0 | -0.21786154  |
| 0 | 0           | 0 | 0.23051042 | 0            | 0           | -0.12157719  | 0 | 0            |
| 0 | 0           | 0 | 0.23737944 | 0            | 0           | -0.036814123 | 0 | 0            |
| 0 | 0           | 0 | 0.24653855 | 0            | 0           | -0.036125371 | 0 | 0            |
| 0 | 0           | 0 | 0.23547189 | 0            | 0           | 0            | 0 | 0            |
| 0 | 0           | 0 | 0.22098169 | 0            | 0           | -0.11656797  | 0 | -0.62689168  |
| 0 | 0           | 0 | 0.22521172 | 0            | 0           | -0.12519292  | 0 | -0.62673744  |
| 0 | -0.13883898 | 0 | 0.34534926 | 0            | -0.28321563 | 0            | 0 | -0.62685142  |



|   |             |   |            |   |              |   |             |   |              |
|---|-------------|---|------------|---|--------------|---|-------------|---|--------------|
| 0 | 0           | 0 | 0.22548573 | 0 | 0            | 0 | -0.116372   | 0 | -0.21591022  |
| 0 | -0.31509994 | 0 | 0          | 0 | -0.087892708 | 0 | 0           | 0 | -0.58203969  |
| 0 | -0.31928575 | 0 | 0          | 0 | -0.095860482 | 0 | 0           | 0 | 0            |
| 0 | -0.26428926 | 0 | 0          | 0 | 0            | 0 | 0           | 0 | -0.6264829   |
| 0 | 0           | 0 | 0.22669329 | 0 | 0            | 0 | -0.11713196 | 0 | 0            |
| 0 | 0           | 0 | 0.16677428 | 0 | 0            | 0 | 0           | 0 | -0.62713859  |
| 0 | -0.3119042  | 0 | 0          | 0 | -0.090180925 | 0 | 0           | 0 | 0.039323786  |
| 0 | -0.26244575 | 0 | 0          | 0 | 0            | 0 | 0.044463737 | 0 | -0.62681014  |
| 0 | -0.28735058 | 0 | 0          | 0 | -0.071222407 | 0 | 0           | 0 | 0            |
| 0 | -0.28458573 | 0 | 0          | 0 | -0.070330027 | 0 | 0.012179442 | 0 | 0            |
| 0 | 0           | 0 | 0.19998378 | 0 | 0            | 0 | 0           | 0 | -0.20274381  |
| 0 | 0           | 0 | 0.20358282 | 0 | 0            | 0 | 0           | 0 | -0.62718265  |
| 0 | -0.26345602 | 0 | 0          | 0 | 0            | 0 | 0           | 0 | -0.62669378  |
| 0 | -0.26926152 | 0 | 0          | 0 | 0            | 0 | 0           | 0 | -0.62644324  |
| 0 | -0.26865799 | 0 | 0          | 0 | 0            | 0 | 0.01001037  | 0 | -0.62645772  |
| 0 | -0.32369888 | 0 | 0          | 0 | -0.094351042 | 0 | 0           | 0 | 0            |
| 0 | -0.323802   | 0 | 0          | 0 | -0.095814825 | 0 | 0.014804924 | 0 | 0            |
| 0 | -0.27626645 | 0 | 0          | 0 | -0.021342128 | 0 | 0.065786462 | 0 | -0.61951349  |
| 0 | -0.31635172 | 0 | 0          | 0 | -0.088655222 | 0 | 0           | 0 | 0.040478215  |
| 0 | -0.26823407 | 0 | 0          | 0 | 0            | 0 | 0.034850087 | 0 | -0.62658468  |
| 0 | -0.31624783 | 0 | 0          | 0 | -0.089850807 | 0 | 0.013504494 | 0 | 0.043874515  |
| 0 | 0           | 0 | 0.2011409  | 0 | 0            | 0 | 0           | 0 | 0            |
| 0 | -0.2887363  | 0 | 0          | 0 | -0.068106361 | 0 | 0.008658859 | 0 | 0            |
| 0 | -0.24596281 | 0 | 0          | 0 | 0.029528713  | 0 | 0           | 0 | -0.62652073  |
| 0 | -0.26353722 | 0 | 0          | 0 | 0            | 0 | 0           | 0 | -0.011311332 |
| 0 | -0.26963057 | 0 | 0          | 0 | 0            | 0 | 0.003634968 | 0 | 0            |
| 0 | -0.26822803 | 0 | 0          | 0 | 0            | 0 | 0           | 0 | 0            |
| 0 | -0.27712241 | 0 | 0          | 0 | -0.027513728 | 0 | 0.054724813 | 0 | 0            |
| 0 | -0.2630397  | 0 | 0          | 0 | 0            | 0 | 0.004938196 | 0 | -0.009257775 |
| 0 | -0.26778506 | 0 | 0          | 0 | 0            | 0 | 0.004949696 | 0 | 0            |
| 0 | -0.27793961 | 0 | 0          | 0 | -0.023493429 | 0 | 0.065777354 | 0 | 0            |
| 0 | -0.27132664 | 0 | 0          | 0 | -0.020354399 | 0 | 0.062558087 | 0 | 5.74E-05     |
| 0 | -0.26239631 | 0 | 0          | 0 | 0            | 0 | 0.03252156  | 0 | -0.014012652 |
| 0 | -0.26292132 | 0 | 0          | 0 | 0.010186509  | 0 | 0           | 0 | -0.62655798  |
| 0 | -0.26730694 | 0 | 0          | 0 | 0            | 0 | 0.033321886 | 0 | 0            |
| 0 | 0           | 0 | 0.41480959 | 0 | -0.24294829  | 0 | 0           | 0 | 0            |
| 0 | 0           | 0 | 0.1910004  | 0 | 0            | 0 | 0           | 0 | -0.62729442  |
| 0 | -0.25743181 | 0 | 0          | 0 | 0.009570819  | 0 | 0           | 0 | -0.024481652 |
| 0 | 0           | 0 | 0.44224099 | 0 | -0.29612924  | 0 | 0           | 0 | 0            |
| 0 | -0.26263066 | 0 | 0          | 0 | 0.008802266  | 0 | 0           | 0 | 0            |
| 0 | -0.31764028 | 0 | 0          | 0 | -0.096819325 | 0 | 0           | 0 | -0.58005244  |
| 0 | -0.26805612 | 0 | 0          | 0 | 0            | 0 | 0.002424432 | 0 | -0.007127615 |
| 0 | -0.27270568 | 0 | 0          | 0 | 0            | 0 | 0.002653902 | 0 | 0            |
| 0 | -0.28647478 | 0 | 0          | 0 | -0.028169623 | 0 | 0.056348746 | 0 | 0            |
| 0 | -0.27998237 | 0 | 0          | 0 | -0.025099173 | 0 | 0.053016839 | 0 | 0.001885862  |
| 0 | 0           | 0 | 0.42933066 | 0 | -0.2681278   | 0 | 0.006351797 | 0 | 0            |
| 0 | -0.34025566 | 0 | 0          | 0 | -0.25318557  | 0 | 0           | 0 | -0.55872708  |

|   |             |   |            |   |              |   |              |              |
|---|-------------|---|------------|---|--------------|---|--------------|--------------|
| 0 | 0           | 0 | 0.36938514 | 0 | -0.33091484  | 0 | 0            | -0.62686323  |
| 0 | 0           | 0 | 0.35059967 | 0 | -0.31480009  | 0 | 0.012253712  | -0.6269265   |
| 0 | 0           | 0 | 0.43519689 | 0 | -0.28319981  | 0 | 0            | 0            |
| 0 | 0           | 0 | 0.35135026 | 0 | -0.31509673  | 0 | 0            | -0.62706527  |
| 0 | 0           | 0 | 0.20061371 | 0 | 0            | 0 | 0            | -0.62705133  |
| 0 | 0           | 0 | 0.37746408 | 0 | -0.23880144  | 0 | -0.006831519 | 0            |
| 0 | 0           | 0 | 0.37736824 | 0 | -0.24283819  | 0 | 0            | 0            |
| 0 | 0           | 0 | 0.41986978 | 0 | -0.24956666  | 0 | 0.015888605  | 0            |
| 0 | -0.32637437 | 0 | 0          | 0 | -0.10502689  | 0 | 0.017555222  | 0            |
| 0 | -0.32619782 | 0 | 0          | 0 | -0.10320095  | 0 | 0            | 0            |
| 0 | -0.34906354 | 0 | 0          | 0 | -0.26034648  | 0 | 0.031251912  | 0            |
| 0 | -0.3188781  | 0 | 0          | 0 | -0.097550718 | 0 | 0            | 0.042339912  |
| 0 | 0           | 0 | 0.44254356 | 0 | -0.28907456  | 0 | -0.014183223 | 0            |
| 0 | -0.31882342 | 0 | 0          | 0 | -0.099089919 | 0 | 0.016239578  | 0.04607704   |
| 0 | -0.26700799 | 0 | 0          | 0 | 0            | 0 | 0            | -0.62667227  |
| 0 | -0.34745031 | 0 | 0          | 0 | -0.25848555  | 0 | 0            | 0            |
| 0 | -0.26643036 | 0 | 0          | 0 | 0            | 0 | 0.011742689  | -0.62646238  |
| 0 | 0           | 0 | 0.36888617 | 0 | -0.33028967  | 0 | 0.010065044  | -0.19056763  |
| 0 | 0           | 0 | 0.36881142 | 0 | -0.32998981  | 0 | 0            | -0.1902768   |
| 0 | -0.34194042 | 0 | 0          | 0 | -0.2546439   | 0 | 0.029809414  | 0.068166532  |
| 0 | -0.28992226 | 0 | 0          | 0 | -0.076293993 | 0 | 0.01116085   | 0            |
| 0 | 0           | 0 | 0.35052243 | 0 | -0.31422378  | 0 | 0.008545239  | -0.19292185  |
| 0 | -0.27471802 | 0 | 0          | 0 | -0.02335548  | 0 | 0.073440717  | -0.62141327  |
| 0 | 0           | 0 | 0.33568114 | 0 | -0.27474121  | 0 | 0.063790133  | -0.62711905  |
| 0 | 0           | 0 | 0.34507397 | 0 | -0.28109196  | 0 | 0.066646621  | -0.6271605   |
| 0 | -0.34071246 | 0 | 0          | 0 | -0.25311356  | 0 | 0            | 0.066069443  |
| 0 | -0.26593011 | 0 | 0          | 0 | 0            | 0 | 0.039624555  | -0.62660425  |
| 0 | 0           | 0 | 0.38140257 | 0 | -0.24566797  | 0 | -0.019540761 | 0            |
| 0 | -0.29837662 | 0 | 0          | 0 | -0.19168931  | 0 | 0.090403653  | -0.59882926  |
| 0 | -0.29525311 | 0 | 0          | 0 | -0.21794918  | 0 | 0.025789326  | 0            |
| 0 | 0           | 0 | 0.37140755 | 0 | -0.33265307  | 0 | 0.007821513  | 0            |
| 0 | 0           | 0 | 0.37121949 | 0 | -0.33230556  | 0 | 0            | 0            |
| 0 | 0           | 0 | 0.37759724 | 0 | -0.2356317   | 0 | -0.012428661 | 0            |
| 0 | 0           | 0 | 0.35205937 | 0 | -0.3157256   | 0 | 0.006378064  | 0            |
| 0 | -0.25957312 | 0 | 0          | 0 | 0.012314403  | 0 | 0            | -0.62655868  |
| 0 | 0           | 0 | 0.31830625 | 0 | -0.24249494  | 0 | 0            | -0.62697163  |
| 0 | 0           | 0 | 0.33599843 | 0 | -0.27472497  | 0 | 0.056952551  | -0.2001742   |
| 0 | -0.26585619 | 0 | 0          | 0 | 0            | 0 | 0.004046451  | -0.009922362 |
| 0 | -0.27055878 | 0 | 0          | 0 | 0            | 0 | 0.004245086  | 0            |
| 0 | -0.28547977 | 0 | 0          | 0 | -0.030772007 | 0 | 0.063205286  | 0            |
| 0 | -0.27891047 | 0 | 0          | 0 | -0.02769759  | 0 | 0.059871871  | -7.93E-05    |
| 0 | 0           | 0 | 0.43626368 | 0 | -0.29281049  | 0 | 0            | 0            |
| 0 | -0.30621137 | 0 | 0          | 0 | -0.19629656  | 0 | 0.085029245  | 0            |
| 0 | -0.29972163 | 0 | 0          | 0 | -0.19233439  | 0 | 0.081784846  | 0.023180371  |
| 0 | 0           | 0 | 0.41823178 | 0 | -0.25355745  | 0 | 0.022628711  | 0            |
| 0 | 0           | 0 | 0.33737333 | 0 | -0.27505907  | 0 | 0.056531104  | 0            |
| 0 | -0.27186345 | 0 | 0          | 0 | -0.15123375  | 0 | 0            | -0.62636988  |

|   |             |   |             |   |             |   |              |   |              |
|---|-------------|---|-------------|---|-------------|---|--------------|---|--------------|
| 0 | 0           | 0 | 0.44351424  | 0 | -0.29867708 | 0 | -0.011408099 | 0 | 0            |
| 0 | 0           | 0 | 0.37938781  | 0 | -0.24617773 | 0 | -0.009529929 | 0 | 0            |
| 0 | 0           | 0 | 0           | 0 | 0.11694846  | 0 | 0            | 0 | -0.25668875  |
| 0 | 0           | 0 | 0           | 0 | 0.1231538   | 0 | 0            | 0 | -0.62879546  |
| 0 | 0           | 0 | 0.26898463  | 0 | 0           | 0 | -0.017259091 | 0 | 0            |
| 0 | 0           | 0 | 0.26719438  | 0 | 0           | 0 | 0            | 0 | 0            |
| 0 | 0           | 0 | 0           | 0 | 0.11664296  | 0 | 0            | 0 | 0            |
| 0 | 0           | 0 | 0           | 0 | 0.12537014  | 0 | -0.025489036 | 0 | -0.25727144  |
| 0 | 0           | 0 | 0           | 0 | 0.12315471  | 0 | 0            | 0 | -0.2549319   |
| 0 | -0.13341186 | 0 | 0.07189364  | 0 | 0           | 0 | 0            | 0 | -0.62704134  |
| 0 | 0           | 0 | 0.27159262  | 0 | 0           | 0 | -0.01857813  | 0 | 0            |
| 0 | 0           | 0 | 0.27296886  | 0 | 0           | 0 | -0.026843557 | 0 | 0            |
| 0 | 0           | 0 | 0           | 0 | 0           | 0 | 0            | 0 | -0.62876026  |
| 0 | 0           | 0 | 0           | 0 | 0.12536461  | 0 | -0.028821883 | 0 | 0            |
| 0 | 0           | 0 | 0           | 0 | 0.12285119  | 0 | 0            | 0 | 0            |
| 0 | 0           | 0 | 0           | 0 | 0.114611    | 0 | 0            | 0 | -0.62858015  |
| 0 | -0.13220581 | 0 | 0.072643429 | 0 | 0           | 0 | 0.012111374  | 0 | -0.1279809   |
| 0 | -0.13164417 | 0 | 0.073076222 | 0 | 0           | 0 | 0            | 0 | -0.12754748  |
| 0 | -0.14190802 | 0 | 0.06212241  | 0 | 0           | 0 | -0.043417907 | 0 | -0.62662177  |
| 0 | 0           | 0 | 0.25737036  | 0 | 0           | 0 | -0.094860975 | 0 | 0            |
| 0 | -0.14639145 | 0 | 0.055769125 | 0 | 0           | 0 | 0            | 0 | -0.62688671  |
| 0 | 0           | 0 | 0           | 0 | 0           | 0 | 0            | 0 | -0.25018847  |
| 0 | 0           | 0 | 0           | 0 | 0           | 0 | -0.010635153 | 0 | -0.25276964  |
| 0 | -0.17737715 | 0 | 0           | 0 | 0           | 0 | 0.021460058  | 0 | -0.62673794  |
| 0 | -0.13835781 | 0 | 0.070069616 | 0 | 0           | 0 | 0.01107839   | 0 | 0            |
| 0 | -0.13769124 | 0 | 0.070503686 | 0 | 0           | 0 | 0            | 0 | 0            |
| 0 | -0.1769152  | 0 | 0           | 0 | 0           | 0 | 0            | 0 | -0.62668156  |
| 0 | 0           | 0 | 0           | 0 | 0.11662141  | 0 | -0.022745913 | 0 | -0.25765537  |
| 0 | 0           | 0 | 0           | 0 | 0           | 0 | -0.076279299 | 0 | -0.62728811  |
| 0 | 0           | 0 | 0           | 0 | 0.11459377  | 0 | 0            | 0 | -0.25549942  |
| 0 | 0           | 0 | 0           | 0 | 0.049597516 | 0 | -0.11162339  | 0 | -0.25630632  |
| 0 | -0.13854015 | 0 | 0.064525782 | 0 | 0           | 0 | -0.036123577 | 0 | -0.1187552   |
| 0 | -0.17848119 | 0 | 0           | 0 | 0           | 0 | -0.021260021 | 0 | -0.62656534  |
| 0 | 0           | 0 | 0           | 0 | 0           | 0 | 0            | 0 | -0.62846707  |
| 0 | 0           | 0 | 0           | 0 | 0           | 0 | -0.007301056 | 0 | -0.62851796  |
| 0 | -0.14401063 | 0 | 0.062361796 | 0 | 0           | 0 | -0.03540858  | 0 | 0            |
| 0 | 0           | 0 | 0           | 0 | 0           | 0 | 0            | 0 | 0            |
| 0 | 0           | 0 | 0           | 0 | 0           | 0 | -0.013935567 | 0 | 0            |
| 0 | 0           | 0 | 0           | 0 | 0           | 0 | -0.06573348  | 0 | -0.24726691  |
| 0 | -0.17616217 | 0 | 0           | 0 | 0           | 0 | 0.01735355   | 0 | -0.095671945 |
| 0 | 0           | 0 | 0           | 0 | 0.05376385  | 0 | -0.11185547  | 0 | -0.6269767   |
| 0 | 0           | 0 | 0           | 0 | 0.050609062 | 0 | -0.11347629  | 0 | 0            |
| 0 | 0           | 0 | 0           | 0 | 0.11660969  | 0 | -0.026086602 | 0 | 0            |
| 0 | -0.18055521 | 0 | 0           | 0 | 0           | 0 | 0.016757539  | 0 | 0            |
| 0 | 0           | 0 | 0           | 0 | 0.11426517  | 0 | 0            | 0 | 0            |
| 0 | 0           | 0 | 0           | 0 | 0           | 0 | 0            | 0 | -0.62741604  |
| 0 | 0           | 0 | 0.26756272  | 0 | 0           | 0 | -0.016424062 | 0 | 0            |

|   |              |   |             |   |              |   |              |   |             |
|---|--------------|---|-------------|---|--------------|---|--------------|---|-------------|
| 0 | 0            | 0 | 0           | 0 | 0.059609213  | 0 | -0.10248344  | 0 | -0.24843409 |
| 0 | 0            | 0 | 0           | 0 | 0            | 0 | -0.010413601 | 0 | -0.25082883 |
| 0 | 0            | 0 | 0           | 0 | 0            | 0 | -0.063354519 | 0 | -0.62730799 |
| 0 | 0            | 0 | 0           | 0 | 0            | 0 | -0.066408029 | 0 | 0           |
| 0 | 0            | 0 | 0           | 0 | 0.008618237  | 0 | 0            | 0 | -0.23777086 |
| 0 | 0            | 0 | 0           | 0 | 0.060730284  | 0 | -0.10386684  | 0 | 0           |
| 0 | 0            | 0 | 0           | 0 | 0            | 0 | 0            | 0 | -0.62845765 |
| 0 | 0            | 0 | 0           | 0 | 0            | 0 | -0.005433112 | 0 | -0.62841199 |
| 0 | -0.2094394   | 0 | 0.037752453 | 0 | 0            | 0 | 0.022197288  | 0 | 0           |
| 0 | 0            | 0 | 0           | 0 | 0            | 0 | -0.013384652 | 0 | 0           |
| 0 | 0            | 0 | 0           | 0 | -0.011687106 | 0 | 0            | 0 | -0.6284167  |
| 0 | 0            | 0 | 0.44186754  | 0 | -0.40798055  | 0 | 0.028503399  | 0 | 0           |
| 0 | 0            | 0 | 0.14263998  | 0 | 0            | 0 | 0            | 0 | -0.62705388 |
| 0 | 0            | 0 | 0.14261452  | 0 | 0            | 0 | 0.009500987  | 0 | -0.62707124 |
| 0 | 0            | 0 | 0           | 0 | 0.048419755  | 0 | -0.1044315   | 0 | -0.62698879 |
| 0 | 0            | 0 | 0           | 0 | 0.012872409  | 0 | 0            | 0 | -0.62751267 |
| 0 | 0            | 0 | 0           | 0 | 0.009157815  | 0 | 0            | 0 | 0           |
| 0 | 0            | 0 | 0           | 0 | 0            | 0 | -0.008548025 | 0 | -0.25155782 |
| 0 | 0            | 0 | 0           | 0 | 0.054020046  | 0 | -0.095588358 | 0 | -0.24916569 |
| 0 | 0            | 0 | 0           | 0 | 0            | 0 | -0.059918933 | 0 | -0.62730881 |
| 0 | -0.081979707 | 0 | 0.14819845  | 0 | 0            | 0 | 0.02697744   | 0 | -0.62726773 |
| 0 | -0.080498859 | 0 | 0.14990596  | 0 | 0            | 0 | 0            | 0 | -0.62720832 |
| 0 | -0.087107385 | 0 | 0.14114233  | 0 | 0            | 0 | 0.005718424  | 0 | -0.62712835 |
| 0 | 0            | 0 | 0.14257866  | 0 | 0            | 0 | 0.006757997  | 0 | -0.23741038 |
| 0 | 0            | 0 | 0           | 0 | 0.055152022  | 0 | -0.096962679 | 0 | 0           |
| 0 | 0            | 0 | 0           | 0 | 0            | 0 | -0.011522968 | 0 | 0           |
| 0 | 0            | 0 | 0.13636045  | 0 | 0            | 0 | -0.053153519 | 0 | -0.62684206 |
| 0 | -0.31296687  | 0 | 0           | 0 | -0.22624495  | 0 | 0.063623451  | 0 | -0.58440549 |
| 0 | 0            | 0 | 0           | 0 | 0.010192204  | 0 | 0            | 0 | -0.62745787 |
| 0 | -0.080211337 | 0 | 0.14924815  | 0 | 0            | 0 | 0.022418127  | 0 | -0.1650447  |
| 0 | 0            | 0 | 0.14354188  | 0 | 0            | 0 | 0.004065644  | 0 | 0           |
| 0 | 0            | 0 | 0           | 0 | 0.13592757   | 0 | 0            | 0 | -0.62851811 |
| 0 | -0.31029021  | 0 | 0           | 0 | -0.22268216  | 0 | 0            | 0 | -0.59087088 |
| 0 | -0.085909838 | 0 | 0.14766478  | 0 | 0            | 0 | 0.021248552  | 0 | 0           |
| 0 | 0            | 0 | 0.1802292   | 0 | 0            | 0 | 0.020257369  | 0 | -0.62725085 |
| 0 | -0.3208347   | 0 | 0           | 0 | -0.23188988  | 0 | 0.058660746  | 0 | 0           |
| 0 | 0            | 0 | 0           | 0 | 0.13630659   | 0 | -0.004336332 | 0 | -0.25791402 |
| 0 | 0            | 0 | 0           | 0 | 0.13588918   | 0 | 0            | 0 | -0.25769234 |
| 0 | -0.3133193   | 0 | 0           | 0 | -0.22591475  | 0 | 0.057268469  | 0 | 0.039353874 |
| 0 | 0            | 0 | 0           | 0 | 0.094520148  | 0 | -0.052119905 | 0 | -0.62736439 |
| 0 | 0            | 0 | 0           | 0 | 0.14204998   | 0 | -0.001604063 | 0 | -0.62877932 |
| 0 | 0            | 0 | 0           | 0 | 0.1419145    | 0 | 0            | 0 | -0.62850062 |
| 0 | 0            | 0 | 0           | 0 | 0.070547723  | 0 | 0            | 0 | -0.62745911 |
| 0 | 0            | 0 | 0           | 0 | 0.0990453    | 0 | -0.047984718 | 0 | -0.25348719 |
| 0 | 0            | 0 | 0           | 0 | 0.13630413   | 0 | -0.007682427 | 0 | 0           |
| 0 | 0            | 0 | 0           | 0 | 0.13556088   | 0 | 0            | 0 | 0           |
| 0 | 0            | 0 | 0           | 0 | 0.14247673   | 0 | -0.006133966 | 0 | -0.25833602 |

|   |             |   |            |   |              |   |              |   |             |
|---|-------------|---|------------|---|--------------|---|--------------|---|-------------|
| 0 | 0           | 0 | 0          | 0 | 0.10238634   | 0 | -0.048608587 | 0 | -0.62736051 |
| 0 | 0           | 0 | 0          | 0 | 0.10052045   | 0 | -0.049098257 | 0 | 0           |
| 0 | 0           | 0 | 0          | 0 | 0.14244176   | 0 | -0.009176914 | 0 | 0           |
| 0 | 0           | 0 | 0          | 0 | 0.13384504   | 0 | 0            | 0 | -0.62849981 |
| 0 | 0           | 0 | 0          | 0 | 0.1336685    | 0 | 0.001299605  | 0 | -0.6284997  |
| 0 | 0           | 0 | 0          | 0 | 0            | 0 | 0.016832428  | 0 | -0.62880556 |
| 0 | 0           | 0 | 0          | 0 | 0            | 0 | 0            | 0 | -0.62866251 |
| 0 | 0           | 0 | 0          | 0 | 0            | 0 | 0.034062873  | 0 | -0.62879632 |
| 0 | -0.33253956 | 0 | 0.34026736 | 0 | -0.43291355  | 0 | 0            | 0 | -0.50203347 |
| 0 | -0.33555111 | 0 | 0.34184197 | 0 | -0.4415794   | 0 | 0            | 0 | 0           |
| 0 | 0           | 0 | 0          | 0 | 0.098349957  | 0 | -0.040401468 | 0 | -0.62738146 |
| 0 | 0           | 0 | 0          | 0 | 0.13414165   | 0 | -0.003291153 | 0 | -0.25880687 |
| 0 | -0.32919266 | 0 | 0.34077614 | 0 | -0.43560656  | 0 | 0            | 0 | 0.11946141  |
| 0 | 0           | 0 | 0          | 0 | 0            | 0 | 0.01281761   | 0 | -0.2519291  |
| 0 | -0.3377796  | 0 | 0.35206157 | 0 | -0.44685745  | 0 | 0            | 0 | 0           |
| 0 | -0.34002661 | 0 | 0.34160777 | 0 | -0.43985443  | 0 | 0            | 0 | 0           |
| 0 | -0.33890771 | 0 | 0.34193147 | 0 | -0.43883342  | 0 | -0.006384459 | 0 | 0           |
| 0 | -0.33370233 | 0 | 0.34053637 | 0 | -0.43386576  | 0 | 0            | 0 | 0.12076689  |
| 0 | -0.33147368 | 0 | 0.35091199 | 0 | -0.44082114  | 0 | 0            | 0 | 0.12354836  |
| 0 | -0.33252964 | 0 | 0.34096364 | 0 | -0.43273976  | 0 | -0.00836376  | 0 | 0.12253144  |
| 0 | 0           | 0 | 0          | 0 | 0.13409587   | 0 | -0.006335044 | 0 | 0           |
| 0 | 0           | 0 | 0          | 0 | 0            | 0 | 0.015995962  | 0 | -0.6281732  |
| 0 | -0.22517165 | 0 | 0          | 0 | -0.098026606 | 0 | 0.17392169   | 0 | -0.62736851 |
| 0 | 0           | 0 | 0          | 0 | 0            | 0 | 0.00984416   | 0 | 0           |
| 0 | -0.3348576  | 0 | 0.34209216 | 0 | -0.44349732  | 0 | 0            | 0 | -0.49983768 |
| 0 | 0           | 0 | 0          | 0 | 0            | 0 | 0.01800601   | 0 | -0.62728055 |
| 0 | 0           | 0 | 0          | 0 | -0.000895165 | 0 | 0.015887186  | 0 | -0.62726168 |
| 0 | 0           | 0 | 0          | 0 | -0.000485004 | 0 | 0            | 0 | -0.627219   |
| 0 | -0.2517001  | 0 | 0.32692274 | 0 | -0.36235515  | 0 | 0            | 0 | 0           |
| 0 | -0.24771118 | 0 | 0.32725871 | 0 | -0.35859471  | 0 | -0.013265804 | 0 | 0           |
| 0 | -0.24640339 | 0 | 0.33473848 | 0 | -0.3648326   | 0 | 0            | 0 | 0           |
| 0 | -0.34236385 | 0 | 0.34340489 | 0 | -0.45037075  | 0 | 0            | 0 | 0           |
| 0 | 0           | 0 | 0          | 0 | -0.021864461 | 0 | -0.019461988 | 0 | -0.62713229 |
| 0 | -0.34021687 | 0 | 0.3527804  | 0 | -0.45658955  | 0 | 0            | 0 | 0           |
| 0 | -0.34134038 | 0 | 0.34363433 | 0 | -0.44958819  | 0 | -0.003772275 | 0 | 0           |
| 0 | 0           | 0 | 0          | 0 | -0.000437421 | 0 | 0.013780611  | 0 | -0.25530456 |
| 0 | -0.25347336 | 0 | 0.32727387 | 0 | -0.35729639  | 0 | -0.017945964 | 0 | 0           |
| 0 | -0.2517901  | 0 | 0.33586013 | 0 | -0.36448897  | 0 | 0            | 0 | 0           |
| 0 | -0.33606865 | 0 | 0.34234932 | 0 | -0.444444186 | 0 | 0            | 0 | 0.12281781  |
| 0 | -0.33394181 | 0 | 0.35164666 | 0 | -0.45061814  | 0 | 0            | 0 | 0.12568567  |
| 0 | -0.33497224 | 0 | 0.34267773 | 0 | -0.44353365  | 0 | -0.005765501 | 0 | 0.12488205  |
| 0 | -0.24766081 | 0 | 0.33446778 | 0 | -0.35916646  | 0 | -0.013678538 | 0 | 0           |
| 0 | -0.26730714 | 0 | 0.32593592 | 0 | -0.30668367  | 0 | 0.072637915  | 0 | -0.56831629 |
| 0 | 0           | 0 | 0          | 0 | 0            | 0 | 0.018174804  | 0 | -0.62859332 |
| 0 | -0.26853062 | 0 | 0.32721578 | 0 | -0.31007192  | 0 | 0.072945692  | 0 | 0           |
| 0 | -0.16794869 | 0 | 0          | 0 | 0            | 0 | 0.049383868  | 0 | -0.62682975 |
| 0 | -0.25275548 | 0 | 0.32640363 | 0 | -0.27555356  | 0 | 0            | 0 | -0.59669694 |

|   |             |   |            |   |              |   |              |             |
|---|-------------|---|------------|---|--------------|---|--------------|-------------|
| 0 | -0.23211266 | 0 | 0.32456434 | 0 | -0.24891605  | 0 | 0            | -0.60504539 |
| 0 | -0.26165316 | 0 | 0.28834906 | 0 | -0.25753968  | 0 | 0            | -0.58250029 |
| 0 | -0.2623076  | 0 | 0.32630341 | 0 | -0.30600464  | 0 | 0.069525923  | 0.051386731 |
| 0 | -0.23904535 | 0 | 0.32279234 | 0 | -0.29851411  | 0 | 0.043064128  | 0           |
| 0 | 0           | 0 | 0          | 0 | -0.000455387 | 0 | 0.010794525  | 0           |
| 0 | -0.24267399 | 0 | 0.29841936 | 0 | -0.27325453  | 0 | 0            | 0           |
| 0 | -0.23696783 | 0 | 0.30070051 | 0 | -0.28231769  | 0 | 0.042545007  | 0           |
| 0 | -0.27906146 | 0 | 0.32824266 | 0 | -0.31841387  | 0 | 0.060424945  | 0           |
| 0 | -0.26354648 | 0 | 0.28811142 | 0 | -0.26108731  | 0 | 0            | 0           |
| 0 | -0.28452183 | 0 | 0.30127006 | 0 | -0.30433088  | 0 | 0.059319194  | 0           |
| 0 | -0.25354098 | 0 | 0.32760177 | 0 | -0.27809257  | 0 | 0            | 0           |
| 0 | -0.25822309 | 0 | 0.28857939 | 0 | -0.25954629  | 0 | 0            | 0.038809211 |
| 0 | -0.24883654 | 0 | 0.32677159 | 0 | -0.27662914  | 0 | 0            | 0.024477747 |
| 0 | -0.27297803 | 0 | 0.32735558 | 0 | -0.31445814  | 0 | 0.056892201  | 0.052769376 |
| 0 | -0.278125   | 0 | 0.3011271  | 0 | -0.30041055  | 0 | 0.056276551  | 0.062003525 |
| 0 | -0.27651082 | 0 | 0.29631493 | 0 | -0.28079666  | 0 | 0            | 0           |
| 0 | -0.27117891 | 0 | 0.29677528 | 0 | -0.27919628  | 0 | 0            | 0.042795278 |
| 0 | -0.24532056 | 0 | 0.30539728 | 0 | -0.29043796  | 0 | 0.031996146  | 0           |
| 0 | -0.25437662 | 0 | 0.32880747 | 0 | -0.36691068  | 0 | -0.015497757 | 0           |
| 0 | -0.25288254 | 0 | 0.33643018 | 0 | -0.37327313  | 0 | 0            | 0           |
| 0 | -0.24860959 | 0 | 0.33497371 | 0 | -0.36805254  | 0 | -0.011201182 | 0           |
| 0 | -0.26566724 | 0 | 0.32677708 | 0 | -0.30950956  | 0 | 0.080177883  | -0.57023599 |
| 0 | -0.25962788 | 0 | 0.28495964 | 0 | -0.2552006   | 0 | 0            | -0.58564296 |
| 0 | -0.24929901 | 0 | 0.32723403 | 0 | -0.27422559  | 0 | 0            | -0.60152434 |
| 0 | -0.2779818  | 0 | 0.329161   | 0 | -0.32184971  | 0 | 0.06719225   | 0           |
| 0 | -0.284338   | 0 | 0.29923226 | 0 | -0.30681312  | 0 | 0.065421216  | 0           |
| 0 | -0.27182996 | 0 | 0.3282678  | 0 | -0.31788506  | 0 | 0.06365944   | 0.050852862 |
| 0 | -0.27786318 | 0 | 0.29906005 | 0 | -0.30284923  | 0 | 0.062337056  | 0.060935905 |
| 0 | -0.27530249 | 0 | 0.29346575 | 0 | -0.27999664  | 0 | 0            | 0           |
| 0 | -0.2460089  | 0 | 0.30364408 | 0 | -0.29390016  | 0 | 0.037950588  | 0           |
| 0 | -0.26993011 | 0 | 0.2939321  | 0 | -0.2784037   | 0 | 0            | 0.039766005 |
| 0 | 0           | 0 | 0          | 0 | 0.10149495   | 0 | 0            | 0           |
| 0 | 0           | 0 | 0          | 0 | 0.1077914    | 0 | 0.002543563  | 0           |
| 0 | -0.3307373  | 0 | 0.36172062 | 0 | -0.57149167  | 0 | 0.033427638  | -0.50082352 |
| 0 | -0.3297453  | 0 | 0.36349674 | 0 | -0.57161787  | 0 | 0            | -0.50476891 |
| 0 | -0.32979903 | 0 | 0.35826073 | 0 | -0.56709005  | 0 | 0            | -0.50312372 |
| 0 | 0           | 0 | 0          | 0 | 0.048843349  | 0 | -0.057259473 | 0           |
| 0 | 0           | 0 | 0          | 0 | 0            | 0 | 0.015270613  | 0           |
| 0 | 0           | 0 | 0          | 0 | 0.10168616   | 0 | -0.007986393 | 0           |
| 0 | 0           | 0 | 0          | 0 | 0.005861175  | 0 | 0.044154096  | -0.62847933 |
| 0 | -0.33752508 | 0 | 0.36327028 | 0 | -0.5778371   | 0 | 0.028993869  | 0           |
| 0 | -0.33767266 | 0 | 0.35976251 | 0 | -0.57488233  | 0 | 0.029555069  | 0           |
| 0 | -0.33662427 | 0 | 0.36023754 | 0 | -0.57392077  | 0 | 0            | 0           |
| 0 | -0.33125537 | 0 | 0.36232529 | 0 | -0.57185494  | 0 | 0.026917497  | 0.12257614  |
| 0 | -0.33138967 | 0 | 0.35864118 | 0 | -0.56873882  | 0 | 0.027584026  | 0.12372623  |
| 0 | -0.3306813  | 0 | 0.35917501 | 0 | -0.56813609  | 0 | 0            | 0.12029391  |
| 0 | 0           | 0 | 0          | 0 | 0.098584509  | 0 | 0.005417726  | 0           |

|   |             |   |            |   |             |   |              |              |
|---|-------------|---|------------|---|-------------|---|--------------|--------------|
| 0 | -0.19620312 | 0 | 0.14806118 | 0 | 0           | 0 | 0            | -0.62663235  |
| 0 | -0.19078476 | 0 | 0.14793636 | 0 | 0           | 0 | 0            | -0.053907159 |
| 0 | -0.19692441 | 0 | 0.14584034 | 0 | 0           | 0 | 0            | 0            |
| 0 | -0.25050515 | 0 | 0.3433551  | 0 | -0.49098198 | 0 | 0.019089733  | 0            |
| 0 | -0.16915191 | 0 | 0.18990733 | 0 | 0           | 0 | 0            | -0.62688639  |
| 0 | -0.22544442 | 0 | 0.13754623 | 0 | 0           | 0 | -0.029969058 | 0            |
| 0 | -0.19400268 | 0 | 0.15082775 | 0 | 0           | 0 | -0.031979065 | 0            |
| 0 | -0.22469129 | 0 | 0.1361191  | 0 | 0           | 0 | 0            | 0            |
| 0 | -0.19985006 | 0 | 0.14882312 | 0 | 0           | 0 | -0.032285856 | 0            |
| 0 | -0.19454427 | 0 | 0.14902544 | 0 | 0           | 0 | 0            | -0.051088327 |
| 0 | -0.17233289 | 0 | 0.19239017 | 0 | 0           | 0 | -0.023558761 | 0            |
| 0 | -0.17313411 | 0 | 0.19052477 | 0 | 0           | 0 | 0            | -0.62688345  |
| 0 | -0.20060751 | 0 | 0.14690419 | 0 | 0           | 0 | 0            | 0            |
| 0 | -0.2267249  | 0 | 0.13931469 | 0 | 0           | 0 | -0.030812768 | 0            |
| 0 | -0.1670159  | 0 | 0.19250654 | 0 | 0           | 0 | -0.028174142 | 0            |
| 0 | -0.20515784 | 0 | 0.13615216 | 0 | 0           | 0 | -0.10574838  | 0            |
| 0 | -0.16788285 | 0 | 0.19033125 | 0 | 0           | 0 | 0            | -0.07035349  |
| 0 | -0.18293082 | 0 | 0.16886746 | 0 | 0           | 0 | -0.090725017 | 0            |
| 0 | -0.17261034 | 0 | 0.19128321 | 0 | 0           | 0 | -0.028670082 | 0            |
| 0 | -0.17364    | 0 | 0.18904289 | 0 | 0           | 0 | 0            | 0            |
| 0 | -0.1999679  | 0 | 0.13646449 | 0 | 0           | 0 | -0.10851699  | 0            |
| 0 | -0.20514185 | 0 | 0.13479084 | 0 | 0           | 0 | -0.10817194  | 0            |
| 0 | -0.17108226 | 0 | 0.19324991 | 0 | 0           | 0 | -0.030546674 | 0            |
| 0 | -0.18519744 | 0 | 0.17109955 | 0 | 0           | 0 | -0.085483894 | 0            |
| 0 | -0.22735428 | 0 | 0.12726002 | 0 | 0           | 0 | -0.096072316 | 0            |
| 0 | -0.17658825 | 0 | 0.19202255 | 0 | 0           | 0 | -0.030826096 | 0            |
| 0 | -0.19604064 | 0 | 0.14451367 | 0 | 0           | 0 | 0            | -0.62661768  |
| 0 | -0.20987223 | 0 | 0.18255701 | 0 | 0           | 0 | -0.02596795  | 0            |
| 0 | -0.32861807 | 0 | 0          | 0 | -0.11468997 | 0 | 0            | -0.56847383  |
| 0 | -0.20236551 | 0 | 0.13809675 | 0 | 0           | 0 | -0.10156158  | 0            |
| 0 | -0.20747399 | 0 | 0.13641765 | 0 | 0           | 0 | -0.10081783  | 0            |
| 0 | -0.17975246 | 0 | 0.17178112 | 0 | 0           | 0 | -0.087956981 | 0            |
| 0 | -0.18452359 | 0 | 0.17110004 | 0 | 0           | 0 | -0.086899129 | 0            |
| 0 | 0           | 0 | 0.367871   | 0 | -0.22447598 | 0 | 0            | -0.627021    |
| 0 | -0.34127578 | 0 | 0          | 0 | -0.12868688 | 0 | 0            | -0.55594016  |
| 0 | -0.33485723 | 0 | 0          | 0 | -0.11653278 | 0 | 0            | -0.56454995  |
| 0 | -0.33466584 | 0 | 0          | 0 | -0.11704363 | 0 | 0.006560899  | 0            |
| 0 | -0.19385551 | 0 | 0.14718155 | 0 | 0           | 0 | -0.030106197 | 0            |
| 0 | -0.34508169 | 0 | 0          | 0 | -0.13651014 | 0 | 0            | 0            |
| 0 | -0.33599154 | 0 | 0          | 0 | -0.11943371 | 0 | 0            | 0            |
| 0 | -0.33604142 | 0 | 0          | 0 | -0.12026304 | 0 | 0.006101122  | 0            |
| 0 | -0.19438594 | 0 | 0.14549207 | 0 | 0           | 0 | 0            | -0.052655594 |
| 0 | -0.19974412 | 0 | 0.14517896 | 0 | 0           | 0 | -0.030434724 | 0            |
| 0 | 0           | 0 | 0.32883611 | 0 | -0.18430463 | 0 | 0            | -0.62711883  |
| 0 | 0           | 0 | 0.33258163 | 0 | -0.20029071 | 0 | -0.041209726 | 0            |
| 0 | -0.33789575 | 0 | 0          | 0 | -0.1309204  | 0 | 0            | 0.065386752  |
| 0 | -0.33079893 | 0 | 0          | 0 | -0.11760741 | 0 | 0            | 0.056509058  |

|   |             |   |            |   |              |   |              |   |              |
|---|-------------|---|------------|---|--------------|---|--------------|---|--------------|
| 0 | -0.32989641 | 0 | 0          | 0 | -0.11663041  | 0 | 0.003233863  | 0 | 0.057477902  |
| 0 | -0.20048154 | 0 | 0.14337135 | 0 | 0            | 0 | 0            | 0 | 0            |
| 0 | -0.17120912 | 0 | 0.1907057  | 0 | 0            | 0 | -0.021610702 | 0 | -0.62661513  |
| 0 | -0.17218112 | 0 | 0.1889349  | 0 | 0            | 0 | 0            | 0 | -0.62664102  |
| 0 | -0.22760986 | 0 | 0.13540884 | 0 | 0            | 0 | -0.029035665 | 0 | 0            |
| 0 | -0.20173921 | 0 | 0.12916723 | 0 | 0            | 0 | 0            | 0 | -0.62670624  |
| 0 | 0           | 0 | 0.33308402 | 0 | -0.22265845  | 0 | 0            | 0 | -0.6271678   |
| 0 | -0.20475635 | 0 | 0.13311591 | 0 | 0            | 0 | -0.10100938  | 0 | -0.62627914  |
| 0 | 0           | 0 | 0.36036316 | 0 | -0.20728185  | 0 | -0.023258131 | 0 | -0.19092058  |
| 0 | 0           | 0 | 0.36093711 | 0 | -0.21039655  | 0 | 0            | 0 | -0.19021606  |
| 0 | -0.29484079 | 0 | 0          | 0 | -0.098955941 | 0 | -0.013590075 | 0 | 0            |
| 0 | 0           | 0 | 0.36665154 | 0 | -0.2225967   | 0 | 0            | 0 | -0.18806944  |
| 0 | -0.29404682 | 0 | 0          | 0 | -0.096881246 | 0 | 0            | 0 | 0            |
| 0 | -0.29227996 | 0 | 0          | 0 | -0.094867969 | 0 | -0.00922679  | 0 | 0            |
| 0 | -0.34855342 | 0 | 0          | 0 | -0.13384128  | 0 | -0.005431228 | 0 | 0            |
| 0 | -0.34910461 | 0 | 0          | 0 | -0.13466484  | 0 | 0            | 0 | 0            |
| 0 | -0.34097611 | 0 | 0          | 0 | -0.11973555  | 0 | 0.002934103  | 0 | 0            |
| 0 | 0           | 0 | 0.36264404 | 0 | -0.20527434  | 0 | -0.022210901 | 0 | -0.62694214  |
| 0 | -0.21596053 | 0 | 0.11055508 | 0 | 0            | 0 | 0            | 0 | -0.62647882  |
| 0 | 0           | 0 | 0.3616796  | 0 | -0.20503254  | 0 | 0            | 0 | -0.62701242  |
| 0 | 0           | 0 | 0.32970301 | 0 | -0.18257913  | 0 | -0.027354816 | 0 | -0.1966575   |
| 0 | 0           | 0 | 0.36880444 | 0 | -0.22009866  | 0 | 0            | 0 | -0.62701631  |
| 0 | -0.34137972 | 0 | 0          | 0 | -0.1281042   | 0 | -0.006906964 | 0 | 0.068635197  |
| 0 | -0.34198203 | 0 | 0          | 0 | -0.12907895  | 0 | 0            | 0 | 0.068077309  |
| 0 | -0.33494552 | 0 | 0          | 0 | -0.11618968  | 0 | -0.00010483  | 0 | 0.060208238  |
| 0 | 0           | 0 | 0.33200429 | 0 | -0.19693685  | 0 | -0.041785718 | 0 | -0.19483688  |
| 0 | 0           | 0 | 0.32848548 | 0 | -0.18388679  | 0 | 0            | 0 | -0.195651    |
| 0 | -0.26813076 | 0 | 0          | 0 | 0            | 0 | 0            | 0 | -0.62645727  |
| 0 | 0           | 0 | 0.3619143  | 0 | -0.2077183   | 0 | -0.024173851 | 0 | 0            |
| 0 | 0           | 0 | 0.32947722 | 0 | -0.1766238   | 0 | -0.024359872 | 0 | -0.6269666   |
| 0 | -0.18346423 | 0 | 0.17061079 | 0 | 0            | 0 | -0.080377472 | 0 | -0.62641175  |
| 0 | 0           | 0 | 0.36356777 | 0 | -0.21309534  | 0 | 0            | 0 | 0            |
| 0 | -0.16999271 | 0 | 0.19156347 | 0 | 0            | 0 | -0.028721779 | 0 | -0.070532336 |
| 0 | 0           | 0 | 0.36819726 | 0 | -0.22311595  | 0 | 0            | 0 | 0            |
| 0 | 0           | 0 | 0.32844171 | 0 | -0.1777215   | 0 | 0            | 0 | -0.62713989  |
| 0 | 0           | 0 | 0.33228047 | 0 | -0.19399927  | 0 | -0.042198141 | 0 | -0.62707841  |
| 0 | -0.21081154 | 0 | 0.11026127 | 0 | 0            | 0 | 0            | 0 | -0.025925852 |
| 0 | -0.27108454 | 0 | 0          | 0 | 0            | 0 | 0            | 0 | -3.1491663   |
| 0 | -0.20199157 | 0 | 0.13500913 | 0 | 0            | 0 | -0.097439211 | 0 | -0.044470479 |
| 0 | -0.21634654 | 0 | 0.10863953 | 0 | 0            | 0 | 0            | 0 | 0            |
| 0 | -0.1755444  | 0 | 0.19033893 | 0 | 0            | 0 | -0.029034929 | 0 | 0            |
| 0 | -0.29580913 | 0 | 0          | 0 | -0.09208409  | 0 | -0.012162427 | 0 | 0            |
| 0 | 0           | 0 | 0          | 0 | 0.11787617   | 0 | 0.024174829  | 0 | 0            |
| 0 | -0.20715437 | 0 | 0.13332837 | 0 | 0            | 0 | -0.096704    | 0 | 0            |
| 0 | -0.22128593 | 0 | 0.0988008  | 0 | 0            | 0 | 0            | 0 | -0.62651618  |
| 0 | 0           | 0 | 0.33133603 | 0 | -0.18423824  | 0 | -0.029805551 | 0 | 0            |
| 0 | -0.24409192 | 0 | 0.2780663  | 0 | -0.36814822  | 0 | 0.14514537   | 0 | -0.60118501  |



|   |             |   |            |   |             |   |              |   |              |
|---|-------------|---|------------|---|-------------|---|--------------|---|--------------|
| 0 | 0           | 0 | 0.33336275 | 0 | -0.1970675  | 0 | -0.042378672 | 0 | 0            |
| 0 | -0.34390318 | 0 | 0          | 0 | -0.13800768 | 0 | 0            | 0 | -0.55376086  |
| 0 | 0           | 0 | 0.33007536 | 0 | -0.18574656 | 0 | 0            | 0 | 0            |
| 0 | -0.33304552 | 0 | 0          | 0 | -0.1175834  | 0 | 0            | 0 | -0.56755198  |
| 0 | -0.33417977 | 0 | 0          | 0 | -0.12098831 | 0 | 0.012955244  | 0 | -0.56320371  |
| 0 | 0           | 0 | 0.36187675 | 0 | -0.20348347 | 0 | -0.026764323 | 0 | -0.19160989  |
| 0 | 0           | 0 | 0.36114285 | 0 | -0.20229482 | 0 | -0.025403299 | 0 | -0.19082897  |
| 0 | 0           | 0 | 0.36125282 | 0 | -0.2044746  | 0 | 0            | 0 | -0.19057992  |
| 0 | -0.27179772 | 0 | 0          | 0 | 0           | 0 | -0.013195929 | 0 | -0.62567413  |
| 0 | 0           | 0 | 0.32933609 | 0 | -0.17591713 | 0 | -0.029158974 | 0 | -0.19727519  |
| 0 | -0.2704638  | 0 | 0          | 0 | 0           | 0 | -0.073553666 | 0 | -0.62622124  |
| 0 | -0.26729084 | 0 | 0          | 0 | 0           | 0 | -0.018070534 | 0 | -0.005173086 |
| 0 | -0.27190226 | 0 | 0          | 0 | 0           | 0 | -0.018017753 | 0 | 0            |
| 0 | -0.27065833 | 0 | 0          | 0 | 0           | 0 | -0.018470198 | 0 | 0            |
| 0 | -0.26701877 | 0 | 0          | 0 | 0           | 0 | 0            | 0 | -0.00548764  |
| 0 | -0.27170077 | 0 | 0          | 0 | 0           | 0 | 0            | 0 | 0            |
| 0 | 0           | 0 | 0.36324636 | 0 | -0.20363812 | 0 | -0.027332675 | 0 | 0            |
| 0 | 0           | 0 | 0.36369426 | 0 | -0.2047231  | 0 | -0.027665549 | 0 | 0            |
| 0 | 0           | 0 | 0.36380606 | 0 | -0.20711342 | 0 | 0            | 0 | 0            |
| 0 | -0.25549106 | 0 | 0.282567   | 0 | -0.38078095 | 0 | 0.13368067   | 0 | 0            |
| 0 | -0.24867176 | 0 | 0.28261477 | 0 | -0.37666966 | 0 | 0.13031868   | 0 | 0.019055354  |
| 0 | -0.3517406  | 0 | 0          | 0 | -0.14395258 | 0 | 0            | 0 | 0            |
| 0 | -0.35127402 | 0 | 0          | 0 | -0.14341952 | 0 | -0.002894081 | 0 | 0            |
| 0 | -0.34086226 | 0 | 0          | 0 | -0.12407705 | 0 | 0.008767884  | 0 | 0            |
| 0 | 0           | 0 | 0.33097139 | 0 | -0.17760284 | 0 | -0.031340821 | 0 | 0            |
| 0 | -0.27290677 | 0 | 0          | 0 | 0           | 0 | -0.067377324 | 0 | -0.62220523  |
| 0 | -0.34464576 | 0 | 0          | 0 | -0.13841422 | 0 | 0            | 0 | 0.070106429  |
| 0 | -0.34410984 | 0 | 0          | 0 | -0.13771611 | 0 | -0.004386388 | 0 | 0.070967672  |
| 0 | 0           | 0 | 0.36052599 | 0 | -0.20866111 | 0 | -0.015411802 | 0 | -0.62695833  |
| 0 | -0.3347724  | 0 | 0          | 0 | -0.12052358 | 0 | 0.005729275  | 0 | 0.059257212  |
| 0 | 0           | 0 | 0.36258281 | 0 | -0.21423603 | 0 | 0            | 0 | -0.62699933  |
| 0 | 0           | 0 | 0.36535745 | 0 | -0.22001969 | 0 | 0            | 0 | -0.62701404  |
| 0 | -0.27654782 | 0 | 0          | 0 | 0           | 0 | -0.019250138 | 0 | 0            |
| 0 | -0.21953192 | 0 | 0.34280759 | 0 | -0.39466555 | 0 | 0.16700259   | 0 | -0.62521115  |
| 0 | -0.27203131 | 0 | 0          | 0 | 0           | 0 | -0.019537717 | 0 | -0.001777779 |
| 0 | -0.21503221 | 0 | 0.10855719 | 0 | 0           | 0 | 0            | 0 | -0.62647181  |
| 0 | -0.2729282  | 0 | 0          | 0 | 0           | 0 | -0.069284023 | 0 | 0            |
| 0 | -0.26872912 | 0 | 0          | 0 | 0           | 0 | -0.069844707 | 0 | -0.001577154 |
| 0 | 0           | 0 | 0.33128592 | 0 | -0.1868328  | 0 | -0.021541085 | 0 | -0.62697579  |
| 0 | 0           | 0 | 0.3332226  | 0 | -0.19899318 | 0 | -0.034076394 | 0 | -0.6269278   |
| 0 | 0           | 0 | 0.3303342  | 0 | -0.18786515 | 0 | 0            | 0 | -0.62705271  |
| 0 | -0.29701418 | 0 | 0          | 0 | -0.10061987 | 0 | -0.009819565 | 0 | 0            |
| 0 | -0.26720684 | 0 | 0          | 0 | 0           | 0 | 0            | 0 | -0.61821921  |
| 0 | 0           | 0 | 0.36205731 | 0 | -0.21171071 | 0 | -0.022694296 | 0 | -0.19106269  |
| 0 | 0           | 0 | 0.35999705 | 0 | -0.20723266 | 0 | -0.020449927 | 0 | -0.19278791  |
| 0 | 0           | 0 | 0.36218366 | 0 | -0.21370037 | 0 | 0            | 0 | -0.19098866  |
| 0 | 0           | 0 | 0.24552863 | 0 | 0           | 0 | -0.029773803 | 0 | -0.62704514  |

|   |             |   |            |   |              |   |              |   |              |
|---|-------------|---|------------|---|--------------|---|--------------|---|--------------|
| 0 | -0.27038805 | 0 | 0          | 0 | 0            | 0 | -0.011437124 | 0 | -0.62724753  |
| 0 | 0           | 0 | 0.23537446 | 0 | 0            | 0 | 0            | 0 | -0.62716506  |
| 0 | -0.27060759 | 0 | 0          | 0 | 0            | 0 | 0            | 0 | -0.62645001  |
| 0 | 0           | 0 | 0.24355186 | 0 | 0            | 0 | 0            | 0 | -0.6273113   |
| 0 | 0           | 0 | 0.3311437  | 0 | -0.18612324  | 0 | -0.026372606 | 0 | -0.19738306  |
| 0 | 0           | 0 | 0.36460494 | 0 | -0.21413705  | 0 | -0.02495296  | 0 | 0            |
| 0 | 0           | 0 | 0.3613698  | 0 | -0.207382    | 0 | -0.021022984 | 0 | 0            |
| 0 | 0           | 0 | 0.36472652 | 0 | -0.21634399  | 0 | 0            | 0 | 0            |
| 0 | 0           | 0 | 0.23702486 | 0 | 0            | 0 | -0.035096003 | 0 | -0.21769553  |
| 0 | 0           | 0 | 0.33277611 | 0 | -0.18781364  | 0 | -0.028564372 | 0 | 0            |
| 0 | 0           | 0 | 0.24039047 | 0 | 0            | 0 | -0.031795114 | 0 | -0.62703402  |
| 0 | 0           | 0 | 0.24570706 | 0 | 0            | 0 | -0.034398562 | 0 | -0.21685884  |
| 0 | -0.27079956 | 0 | 0          | 0 | 0            | 0 | -0.064083145 | 0 | -0.6251255   |
| 0 | 0           | 0 | 0.24797906 | 0 | 0            | 0 | -0.031311587 | 0 | -0.6270546   |
| 0 | 0           | 0 | 0.23515833 | 0 | 0            | 0 | 0            | 0 | -0.216665    |
| 0 | 0           | 0 | 0.23876273 | 0 | 0            | 0 | 0            | 0 | -0.62717079  |
| 0 | -0.21034089 | 0 | 0.25297735 | 0 | -0.29374376  | 0 | 0            | 0 | -0.62641905  |
| 0 | -0.26983499 | 0 | 0          | 0 | 0            | 0 | -0.018037986 | 0 | -0.004577576 |
| 0 | -0.27439676 | 0 | 0          | 0 | 0            | 0 | -0.017800375 | 0 | 0            |
| 0 | 0           | 0 | 0.23819214 | 0 | 0            | 0 | -0.037880261 | 0 | 0            |
| 0 | 0           | 0 | 0.24659542 | 0 | 0            | 0 | -0.036917856 | 0 | 0            |
| 0 | 0           | 0 | 0.2361734  | 0 | 0            | 0 | 0            | 0 | 0            |
| 0 | 0           | 0 | 0.24056412 | 0 | 0            | 0 | -0.036508784 | 0 | -0.2176097   |
| 0 | 0           | 0 | 0.24167321 | 0 | 0            | 0 | -0.039019573 | 0 | 0            |
| 0 | 0           | 0 | 0.21998113 | 0 | 0            | 0 | -0.12109802  | 0 | -0.62687963  |
| 0 | 0           | 0 | 0.22553962 | 0 | 0            | 0 | -0.13023506  | 0 | -0.62672398  |
| 0 | 0           | 0 | 0.22579284 | 0 | 0            | 0 | -0.12012451  | 0 | -0.21468324  |
| 0 | 0           | 0 | 0.23612798 | 0 | 0            | 0 | -0.029737689 | 0 | -0.62703338  |
| 0 | 0           | 0 | 0.22893256 | 0 | 0            | 0 | -0.1186303   | 0 | -0.62673027  |
| 0 | 0           | 0 | 0.24547971 | 0 | 0            | 0 | -0.029175479 | 0 | -0.62705176  |
| 0 | 0           | 0 | 0.23459679 | 0 | 0            | 0 | 0            | 0 | -0.62716457  |
| 0 | 0           | 0 | 0.22699227 | 0 | 0            | 0 | -0.12088032  | 0 | 0            |
| 0 | 0           | 0 | 0.23631655 | 0 | 0            | 0 | -0.03450225  | 0 | -0.21910028  |
| 0 | 0           | 0 | 0.23742824 | 0 | 0            | 0 | -0.037031498 | 0 | 0            |
| 0 | 0           | 0 | 0.22511423 | 0 | 0            | 0 | -0.11417961  | 0 | -0.62673803  |
| 0 | -0.3115049  | 0 | 0          | 0 | -0.089972954 | 0 | 0            | 0 | -0.58565921  |
| 0 | 0           | 0 | 0.20012104 | 0 | 0            | 0 | 0            | 0 | -0.62718258  |
| 0 | -0.31611862 | 0 | 0          | 0 | -0.090372752 | 0 | 0.019253207  | 0 | -0.58070282  |
| 0 | -0.31597408 | 0 | 0          | 0 | -0.088469568 | 0 | 0            | 0 | -0.58458454  |
| 0 | -0.32020442 | 0 | 0          | 0 | -0.097970196 | 0 | 0.015697163  | 0 | 0            |
| 0 | -0.31997954 | 0 | 0          | 0 | -0.096297451 | 0 | 0            | 0 | 0            |
| 0 | -0.26471668 | 0 | 0          | 0 | 0            | 0 | 0            | 0 | -0.62646268  |
| 0 | -0.26413345 | 0 | 0          | 0 | 0            | 0 | 0.010665091  | 0 | -0.62647686  |
| 0 | -0.27293743 | 0 | 0          | 0 | -0.023885826 | 0 | 0.066575677  | 0 | -0.62279519  |
| 0 | -0.31261441 | 0 | 0          | 0 | -0.090622874 | 0 | 0            | 0 | 0.037190912  |
| 0 | -0.31261841 | 0 | 0          | 0 | -0.092021653 | 0 | 0.014447106  | 0 | 0.040340877  |
| 0 | -0.26353723 | 0 | 0          | 0 | 0            | 0 | 0.034551591  | 0 | -0.62680444  |

|   |             |   |             |   |              |   |              |   |              |
|---|-------------|---|-------------|---|--------------|---|--------------|---|--------------|
| 0 | -0.28719864 | 0 | 0           | 0 | -0.072019285 | 0 | 0.010112033  | 0 | 0            |
| 0 | -0.25884696 | 0 | 0           | 0 | 0.009084959  | 0 | 0            | 0 | -0.62674847  |
| 0 | -0.28141916 | 0 | 0           | 0 | -0.028416357 | 0 | 0.057273893  | 0 | -0.6209349   |
| 0 | -0.26910522 | 0 | 0           | 0 | 0            | 0 | 0.008258022  | 0 | -0.62646431  |
| 0 | -0.32439893 | 0 | 0           | 0 | -0.096048955 | 0 | 0.013017257  | 0 | 0            |
| 0 | -0.31687261 | 0 | 0           | 0 | -0.090087097 | 0 | 0.011579627  | 0 | 0.041501633  |
| 0 | 0           | 0 | 0.43487948  | 0 | -0.28928161  | 0 | 0            | 0 | 0            |
| 0 | -0.26346045 | 0 | 0           | 0 | 0            | 0 | 0.003365044  | 0 | -0.011237341 |
| 0 | -0.28284397 | 0 | 0           | 0 | -0.030185568 | 0 | 0.05762969   | 0 | 0            |
| 0 | -0.26816849 | 0 | 0           | 0 | 0            | 0 | 0.003537637  | 0 | 0            |
| 0 | -0.27632734 | 0 | 0           | 0 | -0.02714917  | 0 | 0.054332483  | 0 | -0.00127775  |
| 0 | 0           | 0 | 0.41872008  | 0 | -0.25402342  | 0 | 0.018593437  | 0 | 0            |
| 0 | -0.31870011 | 0 | 0           | 0 | -0.099610163 | 0 | 0.021984216  | 0 | -0.57849757  |
| 0 | 0           | 0 | 0.44236732  | 0 | -0.29522686  | 0 | -0.012808554 | 0 | 0            |
| 0 | -0.31851215 | 0 | 0           | 0 | -0.097360374 | 0 | 0            | 0 | -0.58271508  |
| 0 | -0.34177028 | 0 | 0           | 0 | -0.25506217  | 0 | 0.035413198  | 0 | -0.55649638  |
| 0 | -0.34033192 | 0 | 0           | 0 | -0.25323097  | 0 | 0            | 0 | -0.55903818  |
| 0 | 0           | 0 | 0.36934387  | 0 | -0.33122832  | 0 | 0.014573395  | 0 | -0.62689828  |
| 0 | 0           | 0 | 0.3692675   | 0 | -0.33076243  | 0 | 0            | 0 | -0.62757146  |
| 0 | 0           | 0 | 0.35058641  | 0 | -0.31480701  | 0 | 0.013086687  | 0 | -0.62691714  |
| 0 | 0           | 0 | 0.43535247  | 0 | -0.28277032  | 0 | -0.007252943 | 0 | 0            |
| 0 | 0           | 0 | 0.37796694  | 0 | -0.24249483  | 0 | -0.010679577 | 0 | 0            |
| 0 | -0.32702002 | 0 | 0           | 0 | -0.10524486  | 0 | 0.015643691  | 0 | 0            |
| 0 | -0.34892397 | 0 | 0           | 0 | -0.26025086  | 0 | 0.031643019  | 0 | 0            |
| 0 | -0.31949939 | 0 | 0           | 0 | -0.099308811 | 0 | 0.01418974   | 0 | 0.043582052  |
| 0 | -0.28035821 | 0 | 0           | 0 | -0.031038318 | 0 | 0.064141587  | 0 | -0.62289288  |
| 0 | -0.26693756 | 0 | 0           | 0 | 0            | 0 | 0.009863605  | 0 | -0.62646765  |
| 0 | 0           | 0 | 0.36872262  | 0 | -0.33016657  | 0 | 0.010562196  | 0 | -0.18954309  |
| 0 | -0.34185883 | 0 | 0           | 0 | -0.25458886  | 0 | 0.030043501  | 0 | 0.068473041  |
| 0 | 0           | 0 | 0.33732442  | 0 | -0.27709517  | 0 | 0.060564644  | 0 | -0.62711878  |
| 0 | -0.30095172 | 0 | 0           | 0 | -0.19486239  | 0 | 0.085961809  | 0 | -0.59988466  |
| 0 | 0           | 0 | 0.37117672  | 0 | -0.33246823  | 0 | 0.00858267   | 0 | 0            |
| 0 | 0           | 0 | 0.43635925  | 0 | -0.2925348   | 0 | -0.00448489  | 0 | 0            |
| 0 | 0           | 0 | 0           | 0 | 0.11689841   | 0 | 0            | 0 | -0.62852822  |
| 0 | 0           | 0 | 0           | 0 | 0.11901319   | 0 | -0.023993363 | 0 | -0.25724072  |
| 0 | 0           | 0 | 0           | 0 | 0.11686215   | 0 | 0            | 0 | -0.25453655  |
| 0 | 0           | 0 | 0           | 0 | 0.12494418   | 0 | -0.02135457  | 0 | -0.62849164  |
| 0 | 0           | 0 | 0           | 0 | 0.12310213   | 0 | 0            | 0 | -0.62872617  |
| 0 | 0           | 0 | 0.26821222  | 0 | 0            | 0 | -0.017334774 | 0 | 0            |
| 0 | 0           | 0 | 0           | 0 | 0.11900346   | 0 | -0.027322639 | 0 | 0            |
| 0 | 0           | 0 | 0           | 0 | 0.1165368    | 0 | 0            | 0 | 0            |
| 0 | 0           | 0 | 0           | 0 | 0.1252679    | 0 | -0.024692445 | 0 | -0.25605989  |
| 0 | -0.13418413 | 0 | 0.071220479 | 0 | 0            | 0 | 0.017078161  | 0 | -0.62683759  |
| 0 | -0.13326083 | 0 | 0.071885449 | 0 | 0            | 0 | 0            | 0 | -0.62703432  |
| 0 | 0           | 0 | 0           | 0 | 0            | 0 | 0            | 0 | -0.62845588  |
| 0 | 0           | 0 | 0           | 0 | 0            | 0 | -0.006417845 | 0 | -0.62852447  |
| 0 | 0           | 0 | 0           | 0 | 0.12522359   | 0 | -0.027704127 | 0 | 0            |

|   |              |   |             |   |             |   |              |   |             |
|---|--------------|---|-------------|---|-------------|---|--------------|---|-------------|
| 0 | 0            | 0 | 0           | 0 | 0.11619543  | 0 | -0.018626322 | 0 | -0.62847346 |
| 0 | 0            | 0 | 0           | 0 | 0.11453232  | 0 | 0            | 0 | -0.62863927 |
| 0 | -0.14054807  | 0 | 0.062891814 | 0 | 0           | 0 | -0.03328655  | 0 | -0.62663051 |
| 0 | -0.13206365  | 0 | 0.07259669  | 0 | 0           | 0 | 0.013044306  | 0 | -0.12664073 |
| 0 | 0            | 0 | 0           | 0 | 0.048122652 | 0 | -0.10908955  | 0 | -0.62697787 |
| 0 | 0            | 0 | 0           | 0 | 0           | 0 | -0.009205379 | 0 | -0.25057557 |
| 0 | -0.17713443  | 0 | 0           | 0 | 0           | 0 | 0.022606218  | 0 | -0.62692127 |
| 0 | -0.13816115  | 0 | 0.070021537 | 0 | 0           | 0 | 0.01224018   | 0 | 0           |
| 0 | 0            | 0 | 0           | 0 | 0.054085674 | 0 | -0.099176309 | 0 | -0.24804734 |
| 0 | 0            | 0 | 0           | 0 | 0           | 0 | -0.063476685 | 0 | -0.62729954 |
| 0 | 0            | 0 | 0           | 0 | 0.11651075  | 0 | -0.021997026 | 0 | -0.25650916 |
| 0 | 0            | 0 | 0           | 0 | 0           | 0 | -0.006049278 | 0 | -0.62840201 |
| 0 | 0            | 0 | 0           | 0 | 0.058241992 | 0 | -0.099502748 | 0 | -0.62697405 |
| 0 | 0            | 0 | 0           | 0 | 0           | 0 | -0.012166512 | 0 | 0           |
| 0 | 0            | 0 | 0           | 0 | 0.05520804  | 0 | -0.10054364  | 0 | 0           |
| 0 | 0            | 0 | 0           | 0 | 0.11645406  | 0 | -0.025006348 | 0 | 0           |
| 0 | 0            | 0 | 0           | 0 | 0.008665563 | 0 | 0            | 0 | -0.62745997 |
| 0 | 0            | 0 | 0           | 0 | 0           | 0 | -0.004191166 | 0 | -0.62844452 |
| 0 | 0            | 0 | 0           | 0 | 0.052652495 | 0 | -0.092586215 | 0 | -0.62698681 |
| 0 | 0            | 0 | 0.14241668  | 0 | 0           | 0 | 0.010994357  | 0 | -0.62706398 |
| 0 | -0.081897098 | 0 | 0.1482217   | 0 | 0           | 0 | 0.027358133  | 0 | -0.62728188 |
| 0 | -0.31319397  | 0 | 0           | 0 | -0.226388   | 0 | 0.062991063  | 0 | -0.58520975 |
| 0 | 0            | 0 | 0           | 0 | 0.13590368  | 0 | -9.36E-05    | 0 | -0.62854798 |
| 0 | 0            | 0 | 0           | 0 | 0.13591613  | 0 | 0            | 0 | -0.6284874  |
| 0 | 0            | 0 | 0           | 0 | 0.13630512  | 0 | -0.004324779 | 0 | -0.25789796 |
| 0 | 0            | 0 | 0           | 0 | 0.097474273 | 0 | -0.04502097  | 0 | -0.62738098 |
| 0 | 0            | 0 | 0           | 0 | 0.14203696  | 0 | -0.001752711 | 0 | -0.62845634 |
| 0 | 0            | 0 | 0           | 0 | 0.13626062  | 0 | -0.007356401 | 0 | 0           |
| 0 | -0.32878858  | 0 | 0.34043606  | 0 | -0.43508885 | 0 | 0            | 0 | -0.50561474 |
| 0 | 0            | 0 | 0           | 0 | 0.13370227  | 0 | 0.001084411  | 0 | -0.62848365 |
| 0 | 0            | 0 | 0           | 0 | 0           | 0 | 0.017344546  | 0 | -0.62853793 |
| 0 | -0.33330876  | 0 | 0.34019143  | 0 | -0.43336082 | 0 | 0            | 0 | -0.50438952 |
| 0 | -0.33107708  | 0 | 0.35034578  | 0 | -0.44012957 | 0 | 0            | 0 | -0.50153793 |
| 0 | -0.33408562  | 0 | 0.3520275   | 0 | -0.44887499 | 0 | 0            | 0 | 0           |
| 0 | -0.33238374  | 0 | 0.3403945   | 0 | -0.43267386 | 0 | -0.002867267 | 0 | -0.50220105 |
| 0 | -0.33621654  | 0 | 0.34178803  | 0 | -0.4419544  | 0 | 0            | 0 | 0           |
| 0 | -0.33523359  | 0 | 0.34206763  | 0 | -0.4410813  | 0 | -0.00553324  | 0 | 0           |
| 0 | -0.32775526  | 0 | 0.35087152  | 0 | -0.44284888 | 0 | 0            | 0 | 0.11995634  |
| 0 | -0.32987016  | 0 | 0.34071238  | 0 | -0.43597519 | 0 | 0            | 0 | 0.11746103  |
| 0 | -0.32880037  | 0 | 0.34109399  | 0 | -0.4349984  | 0 | -0.007483604 | 0 | 0.11898839  |
| 0 | -0.33848172  | 0 | 0.35259173  | 0 | -0.44775828 | 0 | 0            | 0 | 0           |
| 0 | -0.33958678  | 0 | 0.34194327  | 0 | -0.43913242 | 0 | -0.008358501 | 0 | 0           |
| 0 | -0.33749658  | 0 | 0.35205322  | 0 | -0.44620727 | 0 | -0.005405983 | 0 | 0           |
| 0 | -0.3321763   | 0 | 0.35146197  | 0 | -0.44173319 | 0 | 0            | 0 | 0.12116307  |
| 0 | -0.33323452  | 0 | 0.34097096  | 0 | -0.43303935 | 0 | -0.010454735 | 0 | 0.11993399  |
| 0 | -0.33114406  | 0 | 0.35091171  | 0 | -0.43998549 | 0 | -0.0074086   | 0 | 0.12306805  |
| 0 | -0.33568867  | 0 | 0.34200349  | 0 | -0.44393511 | 0 | 0            | 0 | -0.50232729 |

|   |             |   |            |   |              |   |              |              |
|---|-------------|---|------------|---|--------------|---|--------------|--------------|
| 0 | -0.33355662 | 0 | 0.35108018 | 0 | -0.44992481  | 0 | 0            | -0.49939066  |
| 0 | -0.33483042 | 0 | 0.34210965 | 0 | -0.44346797  | 0 | -0.000275808 | -0.49984421  |
| 0 | 0           | 0 | 0          | 0 | -0.000941548 | 0 | 0.01804073   | -0.62725107  |
| 0 | -0.25182038 | 0 | 0.32776769 | 0 | -0.36182591  | 0 | -0.016528448 | 0            |
| 0 | -0.25018967 | 0 | 0.33615085 | 0 | -0.368792    | 0 | 0            | 0            |
| 0 | -0.24637989 | 0 | 0.33486408 | 0 | -0.36394427  | 0 | -0.012532642 | 0            |
| 0 | -0.26389707 | 0 | 0.3260618  | 0 | -0.30929634  | 0 | 0.073477252  | -0.57154409  |
| 0 | -0.34097303 | 0 | 0.35333644 | 0 | -0.45750881  | 0 | 0            | 0            |
| 0 | -0.34206317 | 0 | 0.34363927 | 0 | -0.44986333  | 0 | -0.005845798 | 0            |
| 0 | -0.34006851 | 0 | 0.35277616 | 0 | -0.45624207  | 0 | -0.002891257 | 0            |
| 0 | -0.27441197 | 0 | 0.32709081 | 0 | -0.3175118   | 0 | 0.061068037  | -0.57013077  |
| 0 | -0.25809781 | 0 | 0.28824934 | 0 | -0.25954751  | 0 | 0            | -0.58593303  |
| 0 | -0.2488028  | 0 | 0.32649606 | 0 | -0.27676047  | 0 | 0            | -0.60025214  |
| 0 | -0.27924712 | 0 | 0.30170932 | 0 | -0.30371927  | 0 | 0.060586432  | -0.56123558  |
| 0 | -0.2520096  | 0 | 0.33611629 | 0 | -0.3635203   | 0 | -0.017203561 | 0            |
| 0 | -0.33469598 | 0 | 0.35222193 | 0 | -0.45154414  | 0 | 0            | 0.12318213   |
| 0 | -0.33572285 | 0 | 0.34267909 | 0 | -0.44381102  | 0 | -0.007954662 | 0.12219198   |
| 0 | -0.33372988 | 0 | 0.3516469  | 0 | -0.45006574  | 0 | -0.004908215 | 0.12537377   |
| 0 | -0.27110254 | 0 | 0.29648882 | 0 | -0.2793303   | 0 | 0            | -0.58194884  |
| 0 | -0.27542901 | 0 | 0.3283354  | 0 | -0.32050404  | 0 | 0.061675272  | 0            |
| 0 | -0.28113159 | 0 | 0.30134918 | 0 | -0.30693147  | 0 | 0.060079404  | 0            |
| 0 | -0.26932415 | 0 | 0.3274422  | 0 | -0.31657532  | 0 | 0.05817606   | 0.049653027  |
| 0 | -0.27469771 | 0 | 0.30116793 | 0 | -0.30299984  | 0 | 0.057028832  | 0.058733489  |
| 0 | -0.27274056 | 0 | 0.29599708 | 0 | -0.28210522  | 0 | 0            | 0            |
| 0 | -0.24366505 | 0 | 0.30524989 | 0 | -0.29369897  | 0 | 0.034050102  | 0            |
| 0 | -0.26737944 | 0 | 0.2964483  | 0 | -0.28051151  | 0 | 0            | 0.039380292  |
| 0 | -0.28924223 | 0 | 0.30561869 | 0 | -0.31443531  | 0 | 0.050567266  | 0            |
| 0 | -0.28292908 | 0 | 0.30550873 | 0 | -0.31065395  | 0 | 0.047376882  | 0.059318467  |
| 0 | -0.25308033 | 0 | 0.33664992 | 0 | -0.37242282  | 0 | -0.014838702 | 0            |
| 0 | -0.27327077 | 0 | 0.32800039 | 0 | -0.32095023  | 0 | 0.067845266  | -0.57203415  |
| 0 | -0.27901071 | 0 | 0.29967884 | 0 | -0.30620951  | 0 | 0.066696437  | -0.56226406  |
| 0 | -0.26986284 | 0 | 0.29364264 | 0 | -0.27853096  | 0 | 0            | -0.58496847  |
| 0 | -0.28936604 | 0 | 0.30381997 | 0 | -0.31742284  | 0 | 0.056156243  | 0            |
| 0 | -0.28299369 | 0 | 0.30371672 | 0 | -0.31363913  | 0 | 0.052967959  | 0.058208353  |
| 0 | 0           | 0 | 0          | 0 | 0.10113853   | 0 | 0.004344295  | 0            |
| 0 | -0.33110249 | 0 | 0.36175514 | 0 | -0.57177281  | 0 | 0.032379549  | -0.50214395  |
| 0 | -0.33123178 | 0 | 0.35807531 | 0 | -0.5686566   | 0 | 0.033033433  | -0.50101627  |
| 0 | -0.33032137 | 0 | 0.35866714 | 0 | -0.56783159  | 0 | 0            | -0.50485573  |
| 0 | -0.33797065 | 0 | 0.36002491 | 0 | -0.57531446  | 0 | 0.028658243  | 0            |
| 0 | -0.33172045 | 0 | 0.35893881 | 0 | -0.56922473  | 0 | 0.026569117  | 0.12242365   |
| 0 | -0.19260425 | 0 | 0.14701846 | 0 | 0            | 0 | 0            | -0.62664698  |
| 0 | -0.19579656 | 0 | 0.14962527 | 0 | 0            | 0 | -0.026569111 | -0.62653832  |
| 0 | -0.19634201 | 0 | 0.14809672 | 0 | 0            | 0 | 0            | -0.62664105  |
| 0 | -0.19041112 | 0 | 0.14974192 | 0 | 0            | 0 | -0.031254998 | -0.054605967 |
| 0 | -0.19630314 | 0 | 0.14775061 | 0 | 0            | 0 | -0.031614124 | 0            |
| 0 | -0.19085256 | 0 | 0.14798193 | 0 | 0            | 0 | 0            | -0.054544913 |
| 0 | -0.16872768 | 0 | 0.19159157 | 0 | 0            | 0 | -0.022848269 | -0.62662621  |

|   |             |   |            |              |             |              |              |              |
|---|-------------|---|------------|--------------|-------------|--------------|--------------|--------------|
| 0 | -0.19698451 | 0 | 0.14585482 | 0            | 0           | 0            | 0            | 0            |
| 0 | -0.16945344 | 0 | 0.18980236 | 0            | 0           | 0            | 0            | -0.62688954  |
| 0 | -0.2252278  | 0 | 0.1375832  | 0            | 0           | -0.029771003 | 0            | 0            |
| 0 | -0.19422492 | 0 | 0.15095926 | 0            | 0           | -0.033143364 | 0            | -0.052506998 |
| 0 | -0.20004513 | 0 | 0.14893096 | 0            | 0           | -0.033274676 | 0            | 0            |
| 0 | -0.20186555 | 0 | 0.1349569  | 0            | 0           | -0.10622598  | 0            | -0.62636372  |
| 0 | -0.17275383 | 0 | 0.19233118 | 0            | 0           | -0.025116206 | 0            | -0.62662165  |
| 0 | -0.16741245 | 0 | 0.19246102 | 0            | 0           | -0.029592536 | 0            | -0.071758687 |
| 0 | -0.20416392 | 0 | 0.13659135 | 0            | 0           | -0.098702062 | 0            | -0.62627527  |
| 0 | -0.18171545 | 0 | 0.17013294 | 0            | 0           | -0.085149337 | 0            | -0.6263634   |
| 0 | -0.17296568 | 0 | 0.19124215 | 0            | 0           | -0.029920772 | 0            | 0            |
| 0 | -0.19890875 | 0 | 0.13690258 | 0            | 0           | -0.10132314  | 0            | -0.045919371 |
| 0 | -0.20404583 | 0 | 0.13523984 | 0            | 0           | -0.10059828  | 0            | 0            |
| 0 | -0.1956795  | 0 | 0.1459772  | 0            | 0           | -0.02471274  | 0            | -0.62653256  |
| 0 | -0.1962128  | 0 | 0.14456066 | 0            | 0           | 0            | 0            | -0.62663601  |
| 0 | -0.33750063 | 0 | 0          | -0.13070836  | 0           | 0            | 0            | -0.55961116  |
| 0 | -0.33069021 | 0 | 0          | -0.11788681  | 0           | 0            | 0            | -0.56827327  |
| 0 | -0.33110002 | 0 | 0          | -0.11946185  | 0           | 0.007302496  | 0            | -0.56583665  |
| 0 | 0           | 0 | 0.36174918 | 0            | -0.21003171 | 0            | -0.019913125 | 0            |
| 0 | 0           | 0 | 0.36144942 | 0            | -0.21099373 | 0            | 0            | 0            |
| 0 | 0           | 0 | 0.36698848 | 0            | -0.2228509  | 0            | 0            | 0            |
| 0 | -0.34159854 | 0 | 0          | -0.12888264  | 0           | 0            | 0            | -0.55700794  |
| 0 | -0.34121126 | 0 | 0          | -0.1285401   | 0           | -0.001250556 | 0            | -0.55601292  |
| 0 | -0.33604306 | 0 | 0          | -0.11888467  | 0           | 0.004155171  | 0            | -0.56305879  |
| 0 | -0.19411361 | 0 | 0.14733114 | 0            | 0           | -0.031382808 | 0            | -0.053975851 |
| 0 | -0.34484503 | 0 | 0          | -0.13595714  | 0           | -0.004553251 | 0            | 0            |
| 0 | -0.34525784 | 0 | 0          | -0.1366123   | 0           | 0            | 0            | 0            |
| 0 | 0           | 0 | 0.32984198 | 0            | -0.18324482 | 0            | -0.022883814 | 0            |
| 0 | -0.33715934 | 0 | 0          | -0.12174509  | 0           | 0.004119452  | 0            | 0            |
| 0 | -0.19997416 | 0 | 0.14530374 | 0            | 0           | -0.031537636 | 0            | 0            |
| 0 | 0           | 0 | 0.32884731 | 0            | -0.18435949 | 0            | 0            | 0            |
| 0 | 0           | 0 | 0.33236886 | 0            | -0.19903647 | 0            | -0.038690546 | 0            |
| 0 | -0.3376392  | 0 | 0          | -0.13023503  | 0           | -0.005980512 | 0            | 0.065016932  |
| 0 | -0.33811334 | 0 | 0          | -0.13104391  | 0           | 0            | 0            | 0.064691648  |
| 0 | -0.33111721 | 0 | 0          | -0.11823648  | 0           | 0.001118105  | 0            | 0.056907916  |
| 0 | -0.17169142 | 0 | 0.19064391 | 0            | 0           | -0.023312983 | 0            | -0.62662236  |
| 0 | -0.21245262 | 0 | 0.10941902 | 0            | 0           | 0            | 0            | -0.62647978  |
| 0 | -0.203821   | 0 | 0.13350191 | 0            | 0           | -0.094580222 | 0            | -0.62628302  |
| 0 | 0           | 0 | 0.36075819 | 0            | -0.2078887  | 0            | -0.024028859 | 0            |
| 0 | 0           | 0 | 0.36090993 | 0            | -0.20836833 | 0            | -0.023993542 | 0            |
| 0 | 0           | 0 | 0.360939   | 0            | -0.21039778 | 0            | 0            | 0            |
| 0 | -0.29421702 | 0 | 0          | -0.096115035 | 0           | -0.010726114 | 0            | 0            |
| 0 | -0.34881079 | 0 | 0          | -0.13393246  | 0           | -0.006209557 | 0            | 0            |
| 0 | 0           | 0 | 0.36308858 | 0            | -0.2059646  | 0            | -0.023087288 | 0            |
| 0 | 0           | 0 | 0.36162416 | 0            | -0.20326752 | 0            | -0.020845653 | 0            |
| 0 | 0           | 0 | 0.36174127 | 0            | -0.20507731 | 0            | 0            | 0            |
| 0 | 0           | 0 | 0.32970224 | 0            | -0.18257266 | 0            | -0.027399677 | 0            |

|   |             |   |            |   |              |   |              |   |              |
|---|-------------|---|------------|---|--------------|---|--------------|---|--------------|
| 0 | -0.34167711 | 0 | 0          | 0 | -0.12820169  | 0 | -0.007831812 | 0 | 0.067443831  |
| 0 | -0.26836171 | 0 | 0          | 0 | 0            | 0 | -0.01242604  | 0 | -0.62639314  |
| 0 | -0.26819626 | 0 | 0          | 0 | 0            | 0 | 0            | 0 | -0.62646415  |
| 0 | 0           | 0 | 0.3634579  | 0 | -0.21079464  | 0 | -0.026252151 | 0 | 0            |
| 0 | 0           | 0 | 0.36212901 | 0 | -0.20804704  | 0 | -0.02459535  | 0 | 0            |
| 0 | 0           | 0 | 0.32947552 | 0 | -0.17659984  | 0 | -0.024560308 | 0 | -0.62697008  |
| 0 | -0.24983199 | 0 | 0.28322035 | 0 | -0.37969842  | 0 | 0.13474425   | 0 | -0.60391689  |
| 0 | 0           | 0 | 0.36348322 | 0 | -0.21303781  | 0 | 0            | 0 | 0            |
| 0 | -0.27132666 | 0 | 0          | 0 | 0            | 0 | -0.010841082 | 0 | -3.1253714   |
| 0 | 0           | 0 | 0.3313379  | 0 | -0.18426836  | 0 | -0.029569248 | 0 | 0            |
| 0 | -0.34427046 | 0 | 0          | 0 | -0.13821431  | 0 | 0            | 0 | -0.55496873  |
| 0 | -0.34394702 | 0 | 0          | 0 | -0.13814909  | 0 | 0.001264729  | 0 | -0.55367704  |
| 0 | -0.33588217 | 0 | 0          | 0 | -0.12322667  | 0 | 0.009997934  | 0 | -0.56399965  |
| 0 | -0.26819918 | 0 | 0          | 0 | 0            | 0 | -0.066056417 | 0 | -3.1338714   |
| 0 | 0           | 0 | 0.36132622 | 0 | -0.20237501  | 0 | -0.026048292 | 0 | -0.19178328  |
| 0 | -0.26743599 | 0 | 0          | 0 | 0            | 0 | -0.018605005 | 0 | -0.005870437 |
| 0 | -0.27200587 | 0 | 0          | 0 | 0            | 0 | -0.018376987 | 0 | 0            |
| 0 | 0           | 0 | 0.36380712 | 0 | -0.204771    | 0 | -0.02806315  | 0 | 0            |
| 0 | -0.35156683 | 0 | 0          | 0 | -0.1435072   | 0 | -0.003765724 | 0 | 0            |
| 0 | -0.34444343 | 0 | 0          | 0 | -0.13781138  | 0 | -0.005400924 | 0 | 0.069679276  |
| 0 | 0           | 0 | 0.36121113 | 0 | -0.20971822  | 0 | -0.016763876 | 0 | -0.62695534  |
| 0 | 0           | 0 | 0.36253616 | 0 | -0.21267863  | 0 | -0.018144282 | 0 | -0.62692563  |
| 0 | 0           | 0 | 0.36266673 | 0 | -0.21429172  | 0 | 0            | 0 | -0.62700689  |
| 0 | 0           | 0 | 0.33128017 | 0 | -0.18680136  | 0 | -0.021794224 | 0 | -0.62696605  |
| 0 | 0           | 0 | 0.36225105 | 0 | -0.2117833   | 0 | -0.023381228 | 0 | -0.1920742   |
| 0 | 0           | 0 | 0.23694184 | 0 | 0            | 0 | -0.030805953 | 0 | -0.62703642  |
| 0 | 0           | 0 | 0.24553905 | 0 | 0            | 0 | -0.029973156 | 0 | -0.62705206  |
| 0 | -0.27087655 | 0 | 0          | 0 | 0            | 0 | -0.012305849 | 0 | -0.62639938  |
| 0 | 0           | 0 | 0.23530062 | 0 | 0            | 0 | 0            | 0 | -0.6271616   |
| 0 | 0           | 0 | 0.36472948 | 0 | -0.21418487  | 0 | -0.025395321 | 0 | 0            |
| 0 | 0           | 0 | 0.23712229 | 0 | 0            | 0 | -0.035240629 | 0 | -0.21776885  |
| 0 | 0           | 0 | 0.24045036 | 0 | 0            | 0 | -0.032088343 | 0 | -0.62703458  |
| 0 | 0           | 0 | 0.2381676  | 0 | 0            | 0 | -0.037765551 | 0 | 0            |
| 0 | 0           | 0 | 0.22543081 | 0 | 0            | 0 | -0.11792856  | 0 | -0.62674612  |
| 0 | 0           | 0 | 0.23620494 | 0 | 0            | 0 | -0.030099683 | 0 | -0.62703613  |
| 0 | -0.31248867 | 0 | 0          | 0 | -0.092536123 | 0 | 0.020189357  | 0 | -0.58423196  |
| 0 | -0.31224185 | 0 | 0          | 0 | -0.090427525 | 0 | 0            | 0 | -0.58786228  |
| 0 | -0.3167338  | 0 | 0          | 0 | -0.090606034 | 0 | 0.017349876  | 0 | -0.58304873  |
| 0 | -0.27779916 | 0 | 0          | 0 | -0.030478254 | 0 | 0.058560984  | 0 | -0.62422986  |
| 0 | -0.32072466 | 0 | 0          | 0 | -0.098147501 | 0 | 0.014168735  | 0 | 0            |
| 0 | -0.26450531 | 0 | 0          | 0 | 0            | 0 | 0.009172801  | 0 | -0.62652232  |
| 0 | -0.31317454 | 0 | 0          | 0 | -0.092205984 | 0 | 0.012776815  | 0 | 0.038307241  |
| 0 | 0           | 0 | 0.43490056 | 0 | -0.28882405  | 0 | -0.005604327 | 0 | 0            |
| 0 | -0.31936572 | 0 | 0          | 0 | -0.099826755 | 0 | 0.019958218  | 0 | -0.58096553  |
| 0 | -0.34168321 | 0 | 0          | 0 | -0.25500226  | 0 | 0.035667254  | 0 | -0.55616393  |
| 0 | 0           | 0 | 0.36915368 | 0 | -0.33107572  | 0 | 0.015198774  | 0 | -0.62689145  |
| 0 | 0           | 0 | 0          | 0 | 0.11861268   | 0 | -0.019850142 | 0 | -0.62876133  |

|   |             |   |             |   |             |   |              |              |
|---|-------------|---|-------------|---|-------------|---|--------------|--------------|
| 0 | 0           | 0 | 0           | 0 | 0.11682205  | 0 | 0            | -0.62872054  |
| 0 | 0           | 0 | 0           | 0 | 0.11885392  | 0 | -0.022899193 | -0.25558397  |
| 0 | 0           | 0 | 0           | 0 | 0.1248335   | 0 | -0.02039458  | -0.62866082  |
| 0 | 0           | 0 | 0           | 0 | 0.11879965  | 0 | -0.025896157 | 0            |
| 0 | -0.13402249 | 0 | 0.071170032 | 0 | 0           | 0 | 0.018119282  | -0.62683268  |
| 0 | 0           | 0 | 0           | 0 | 0           | 0 | -0.004839131 | -0.62841725  |
| 0 | 0           | 0 | 0           | 0 | 0.052720363 | 0 | -0.096179243 | -0.62697508  |
| 0 | 0           | 0 | 0           | 0 | 0.1160595   | 0 | -0.017722899 | -0.6284239   |
| 0 | 0           | 0 | 0           | 0 | 0.13587433  | 0 | 5.74E-05     | -0.62847966  |
| 0 | -0.3273651  | 0 | 0.35030956  | 0 | -0.44215492 | 0 | 0            | -0.5051225   |
| 0 | -0.3294847  | 0 | 0.34037124  | 0 | -0.43546712 | 0 | 0            | -0.50768557  |
| 0 | -0.32867803 | 0 | 0.34052566  | 0 | -0.43492099 | 0 | -0.001978087 | -0.50572545  |
| 0 | -0.33179587 | 0 | 0.35091183  | 0 | -0.44106441 | 0 | 0            | -0.50399141  |
| 0 | -0.33307768 | 0 | 0.34040355  | 0 | -0.43296824 | 0 | -0.004935952 | -0.50477024  |
| 0 | -0.33098675 | 0 | 0.35035148  | 0 | -0.43991516 | 0 | -0.00190229  | -0.50165494  |
| 0 | -0.33472064 | 0 | 0.35250026  | 0 | -0.44965709 | 0 | 0            | 0            |
| 0 | -0.33385178 | 0 | 0.35202442  | 0 | -0.4483307  | 0 | -0.004570699 | 0            |
| 0 | -0.33584202 | 0 | 0.34208097  | 0 | -0.44132458 | 0 | -0.007267274 | 0            |
| 0 | -0.32839417 | 0 | 0.3513612   | 0 | -0.44363913 | 0 | 0            | 0.11785695   |
| 0 | -0.32946448 | 0 | 0.34110091  | 0 | -0.43523733 | 0 | -0.009322121 | 0.116729     |
| 0 | -0.32747241 | 0 | 0.35087224  | 0 | -0.44211421 | 0 | -0.006529953 | 0.11954127   |
| 0 | -0.3381308  | 0 | 0.35260816  | 0 | -0.44691288 | 0 | -0.007422565 | 0            |
| 0 | -0.33180143 | 0 | 0.35149758  | 0 | -0.44072036 | 0 | -0.009536695 | 0.12039086   |
| 0 | -0.33432853 | 0 | 0.35167109  | 0 | -0.45087363 | 0 | 0            | -0.50196312  |
| 0 | -0.3355684  | 0 | 0.34211042  | 0 | -0.44373686 | 0 | -0.002442171 | -0.50250618  |
| 0 | -0.33354263 | 0 | 0.35108456  | 0 | -0.4499605  | 0 | 0.000605006  | -0.49932042  |
| 0 | -0.25039852 | 0 | 0.33638838  | 0 | -0.36788957 | 0 | -0.015801877 | 0            |
| 0 | -0.27074889 | 0 | 0.32718153  | 0 | -0.3196204  | 0 | 0.062343367  | -0.57325069  |
| 0 | -0.27583294 | 0 | 0.30178974  | 0 | -0.30634166 | 0 | 0.061372067  | -0.56447972  |
| 0 | -0.26730677 | 0 | 0.29616744  | 0 | -0.28064127 | 0 | 0            | -0.58535587  |
| 0 | -0.28397083 | 0 | 0.30604787  | 0 | -0.31380438 | 0 | 0.051870465  | -0.5638464   |
| 0 | -0.34074219 | 0 | 0.35334823  | 0 | -0.45693958 | 0 | -0.00499753  | 0            |
| 0 | -0.28566767 | 0 | 0.30550385  | 0 | -0.31650558 | 0 | 0.051709806  | 0            |
| 0 | -0.33442333 | 0 | 0.35224823  | 0 | -0.45078611 | 0 | -0.007123645 | 0.12261064   |
| 0 | -0.27933287 | 0 | 0.30539096  | 0 | -0.31275092 | 0 | 0.048552274  | 0.056234148  |
| 0 | -0.28404205 | 0 | 0.30425533  | 0 | -0.31679594 | 0 | 0.057471191  | -0.56494532  |
| 0 | -0.33155411 | 0 | 0.35836747  | 0 | -0.56913118 | 0 | 0.032040425  | -0.50229052  |
| 0 | -0.19223333 | 0 | 0.14854819  | 0 | 0           | 0 | -0.025874988 | -0.62654647  |
| 0 | -0.19270519 | 0 | 0.14704506  | 0 | 0           | 0 | 0            | -0.62665005  |
| 0 | -0.19601804 | 0 | 0.14974833  | 0 | 0           | 0 | -0.027652335 | -0.62654186  |
| 0 | -0.1906013  | 0 | 0.14985421  | 0 | 0           | 0 | -0.032198362 | -0.055861822 |
| 0 | -0.1964607  | 0 | 0.14783762  | 0 | 0           | 0 | -0.032377751 | 0            |
| 0 | -0.16910663 | 0 | 0.19154739  | 0 | 0           | 0 | -0.024192251 | -0.62663149  |
| 0 | -0.20071323 | 0 | 0.13541782  | 0 | 0           | 0 | -0.098465814 | -0.62631952  |
| 0 | -0.19592609 | 0 | 0.14611505  | 0 | 0           | 0 | -0.0259116   | -0.62653542  |
| 0 | -0.33773107 | 0 | 0           | 0 | -0.13083978 | 0 | 0            | -0.56038261  |
| 0 | -0.33747154 | 0 | 0           | 0 | -0.13066425 | 0 | -0.000330946 | -0.5596263   |



|   |             |   |            |   |              |   |              |   |             |
|---|-------------|---|------------|---|--------------|---|--------------|---|-------------|
| 0 | -0.3322044  | 0 | 0          | 0 | -0.12091933  | 0 | 0.005372702  | 0 | -0.56635869 |
| 0 | 0           | 0 | 0.36199121 | 0 | -0.21035499  | 0 | -0.020326536 | 0 | -0.62698992 |
| 0 | 0           | 0 | 0.36139243 | 0 | -0.20933694  | 0 | -0.019442107 | 0 | -0.62692559 |
| 0 | 0           | 0 | 0.36142684 | 0 | -0.21099158  | 0 | 0            | 0 | -0.62700519 |
| 0 | -0.34150113 | 0 | 0          | 0 | -0.12863909  | 0 | -0.002154791 | 0 | -0.55717366 |
| 0 | -0.34502343 | 0 | 0          | 0 | -0.13601245  | 0 | -0.005077592 | 0 | 0           |
| 0 | 0           | 0 | 0.32984267 | 0 | -0.18325535  | 0 | -0.02280186  | 0 | -0.62696427 |
| 0 | -0.33786246 | 0 | 0          | 0 | -0.13030096  | 0 | -0.006653445 | 0 | 0.064163297 |
| 0 | 0           | 0 | 0.36101529 | 0 | -0.20841609  | 0 | -0.024360247 | 0 | -0.19134719 |
| 0 | 0           | 0 | 0.3617768  | 0 | -0.20333426  | 0 | -0.02138039  | 0 | -0.6269315  |
| 0 | -0.2684743  | 0 | 0          | 0 | 0            | 0 | -0.012875043 | 0 | -0.62641195 |
| 0 | 0           | 0 | 0.36349186 | 0 | -0.21080807  | 0 | -0.026370538 | 0 | 0           |
| 0 | -0.3442716  | 0 | 0          | 0 | -0.1382425   | 0 | 0.00026984   | 0 | -0.55493991 |
| 0 | 0           | 0 | 0.36269848 | 0 | -0.21273959  | 0 | -0.018721437 | 0 | -0.62692835 |
| 0 | 0           | 0 | 0.23695008 | 0 | 0            | 0 | -0.030839305 | 0 | -0.62703895 |
| 0 | -0.31302907 | 0 | 0          | 0 | -0.092713321 | 0 | 0.018544907  | 0 | -0.58624158 |
| 0 | 0           | 0 | 0          | 0 | 0.11841017   | 0 | -0.018615698 | 0 | -0.6284116  |
| 0 | -0.32801758 | 0 | 0.35081624 | 0 | -0.44296733  | 0 | 0            | 0 | -0.50728579 |
| 0 | -0.32930762 | 0 | 0.34053609 | 0 | -0.43516215  | 0 | -0.003809944 | 0 | -0.50797336 |
| 0 | -0.32727682 | 0 | 0.35034091 | 0 | -0.44202688  | 0 | -0.000990813 | 0 | -0.5051397  |
| 0 | -0.33163348 | 0 | 0.3509331  | 0 | -0.44063951  | 0 | -0.004010171 | 0 | -0.50430986 |
| 0 | -0.33442691 | 0 | 0.35251578 | 0 | -0.44893381  | 0 | -0.00635262  | 0 | 0           |
| 0 | -0.32807212 | 0 | 0.35139435 | 0 | -0.4427436   | 0 | -0.008425478 | 0 | 0.1171835   |
| 0 | -0.33426116 | 0 | 0.35168216 | 0 | -0.45070244  | 0 | -0.001603424 | 0 | -0.50208538 |
| 0 | -0.28037061 | 0 | 0.30593318 | 0 | -0.31589331  | 0 | 0.053039525  | 0 | -0.56693147 |
| 0 | -0.19240905 | 0 | 0.14864822 | 0 | 0            | 0 | -0.026738267 | 0 | -0.62655129 |
| 0 | -0.33768529 | 0 | 0          | 0 | -0.13072723  | 0 | -0.000984956 | 0 | -0.56045446 |
| 0 | 0           | 0 | 0.36146675 | 0 | -0.20936418  | 0 | -0.019698124 | 0 | -0.62693011 |
| 0 | -0.32790227 | 0 | 0.35083236 | 0 | -0.44266032  | 0 | -0.002904208 | 0 | -0.50750953 |



|   |              |   |            |   |             |             |              |
|---|--------------|---|------------|---|-------------|-------------|--------------|
| 0 | 0            | 0 | 0.14558089 | 0 | 0           | 0           | 0            |
| 0 | 0            | 0 | 0.24853902 | 0 | 0           | 0           | 0            |
| 0 | 0            | 0 | 0          | 0 | 0.13323205  | 0           | 0            |
| 0 | 0.36285897   | 0 | 0          | 0 | 0           | 0           | 0            |
| 0 | 0            | 0 | 0          | 0 | 0.24069458  | 0           | 0            |
| 0 | 0            | 0 | 0.18618344 | 0 | 0           | 0           | 0            |
| 0 | 0            | 0 | 0.22221339 | 0 | 0           | 0           | 0            |
| 0 | 0            | 0 | 0          | 0 | 0           | 0.077646895 | 0            |
| 0 | 0            | 0 | 0.54836551 | 0 | -0.35560338 | 0           | 0            |
| 0 | 0            | 0 | 0.1738086  | 0 | 0           | 0           | 0            |
| 0 | 0            | 0 | 0          | 0 | 0.21204761  | 0           | 0            |
| 0 | 0            | 0 | 0          | 0 | 0.17620236  | 0           | 0            |
| 0 | 0            | 0 | 0.17456584 | 0 | 0           | 0           | 0            |
| 0 | 0            | 0 | 0.19949267 | 0 | 0           | 0           | -7.99E-06    |
| 0 | 0            | 0 | 0          | 0 | 0           | 0           | 0            |
| 0 | 0            | 0 | 0          | 0 | 0.16006965  | 0           | 0            |
| 0 | 0            | 0 | 0          | 0 | 0.16085655  | 0           | 0            |
| 0 | 0            | 0 | 0          | 0 | 0           | 0           | 0            |
| 0 | 0            | 0 | 0          | 0 | 0           | 0           | 0            |
| 0 | 0            | 0 | 0          | 0 | 0.18678759  | 0           | -0.004757047 |
| 0 | 0            | 0 | 0.25022283 | 0 | 0           | 0           | 0            |
| 0 | 0            | 0 | 0.25209353 | 0 | 0           | 0           | 0            |
| 0 | 0            | 0 | 0.26550365 | 0 | 0           | 0           | -0.038815624 |
| 0 | 0            | 0 | 0.2727952  | 0 | 0           | 0           | 0            |
| 0 | 0            | 0 | 0.54161255 | 0 | -0.26575631 | 0           | 0            |
| 0 | 0            | 0 | 0.27844717 | 0 | 0           | 0           | 0            |
| 0 | -0.003822369 | 0 | 0.28029002 | 0 | 0           | 0           | 0            |
| 0 | 0            | 0 | 0          | 0 | 0.23863526  | 0           | 0            |
| 0 | 0            | 0 | 0          | 0 | 0.24033508  | 0           | 0            |
| 0 | 0            | 0 | 0.17253378 | 0 | 0           | 0           | 0            |
| 0 | 0            | 0 | 0          | 0 | 0.25583608  | 0           | -0.043543757 |
| 0 | 0            | 0 | 0          | 0 | 0           | 0           | 0            |
| 0 | 0            | 0 | 0.15937298 | 0 | 0           | 0           | 0            |
| 0 | 0            | 0 | 0          | 0 | 0.26372949  | 0           | 0            |
| 0 | 0            | 0 | 0          | 0 | 0           | 0           | 0            |
| 0 | -0.22629317  | 0 | 0.15923093 | 0 | 0           | 0           | 0            |
| 0 | 0            | 0 | 0          | 0 | 0           | 0           | 0            |
| 0 | 0            | 0 | 0          | 0 | 0.1625686   | 0           | 0            |
| 0 | -0.19702344  | 0 | 0          | 0 | 0           | 0           | 0            |
| 0 | 0            | 0 | 0          | 0 | 0.26882489  | 0           | 0            |
| 0 | -0.007801751 | 0 | 0          | 0 | 0.27072049  | 0           | 0            |
| 0 | 0            | 0 | 0          | 0 | 0.15088167  | 0           | 0            |
| 0 | -0.22658594  | 0 | 0          | 0 | 0.15072894  | 0           | 0            |
| 0 | 0            | 0 | 0          | 0 | 0           | 0.06238664  | 0            |
| 0 | 0            | 0 | 0          | 0 | 0           | 0.051701989 | 0            |
| 0 | 0            | 0 | 0          | 0 | 0           | 0           | 0            |
| 0 | 0            | 0 | 0          | 0 | 0           | 0           | 0            |

|   |              |   |            |   |             |             |              |
|---|--------------|---|------------|---|-------------|-------------|--------------|
| 0 | 0            | 0 | 0          | 0 | 0           | 0           | 0            |
| 0 | 0            | 0 | 0.25725092 | 0 | 0           | 0           | 0            |
| 0 | 0            | 0 | 0          | 0 | 0           | 0.011892046 | 0            |
| 0 | 0            | 0 | 0          | 0 | 0           | 0           | 0            |
| 0 | -0.084546012 | 0 | 0          | 0 | 0           | 0           | 0            |
| 0 | 0            | 0 | 0          | 0 | 0.24425647  | 0           | 0            |
| 0 | 0            | 0 | 0          | 0 | 0           | 0           | 0            |
| 0 | 0            | 0 | 0          | 0 | 0           | 0.030297948 | 0            |
| 0 | 0            | 0 | 0          | 0 | 0           | 0           | 0            |
| 0 | 0            | 0 | 0.24161418 | 0 | 0           | 0           | 0            |
| 0 | 0            | 0 | 0          | 0 | 0           | 0           | 0            |
| 0 | 0            | 0 | 0.20563527 | 0 | 0           | 0.11275002  | 0            |
| 0 | 0            | 0 | 0          | 0 | 0           | 0           | 0            |
| 0 | 0            | 0 | 0          | 0 | 0           | 0           | 0            |
| 0 | 0            | 0 | 0.13629957 | 0 | 0           | 0           | 0            |
| 0 | -0.15283004  | 0 | 0          | 0 | 0           | 0           | 0            |
| 0 | -0.24639053  | 0 | 0.13613908 | 0 | 0           | 0           | 0            |
| 0 | 0            | 0 | 0          | 0 | 0           | 0           | 0            |
| 0 | 0            | 0 | 0          | 0 | 0.22960619  | 0           | 0            |
| 0 | 0            | 0 | 0          | 0 | 0           | 0           | 0            |
| 0 | 0            | 0 | 0          | 0 | 0           | 0           | 0            |
| 0 | 0            | 0 | 0          | 0 | 0.12411156  | 0           | 0            |
| 0 | 0.3894762    | 0 | 0          | 0 | 0           | 0           | 0            |
| 0 | 0            | 0 | 0          | 0 | 0.19547028  | 0           | 0.10927741   |
| 0 | 0            | 0 | 0          | 0 | 0           | 0           | 0            |
| 0 | 0            | 0 | 0          | 0 | 0           | 0.02553203  | 0            |
| 0 | -0.2299167   | 0 | 0          | 0 | 0           | 0           | 0            |
| 0 | 0            | 0 | 0          | 0 | 0           | 0           | 0            |
| 0 | -0.24708754  | 0 | 0          | 0 | 0.12394279  | 0           | 0            |
| 0 | -0.23188915  | 0 | 0          | 0 | 0           | 0           | 0            |
| 0 | -0.22372221  | 0 | 0          | 0 | 0           | 0.02660027  | 0            |
| 0 | -0.23552022  | 0 | 0          | 0 | 0           | 0           | 0            |
| 0 | 0            | 0 | 0          | 0 | 0           | 0           | 0            |
| 0 | 0            | 0 | 0.17580122 | 0 | 0           | 0           | 0            |
| 0 | 0            | 0 | 0          | 0 | 0           | 0           | -0.006101087 |
| 0 | -0.24883548  | 0 | 0.17570179 | 0 | 0           | 0           | 0            |
| 0 | 0            | 0 | 0          | 0 | 0           | 0           | 0            |
| 0 | 0            | 0 | 0.21678995 | 0 | 0           | 0           | 0            |
| 0 | 0            | 0 | 0          | 0 | 0           | 0           | 0            |
| 0 | 0            | 0 | 0          | 0 | 0           | 0.000219407 | 0            |
| 0 | 0            | 0 | 0          | 0 | 0.16595806  | 0           | 0            |
| 0 | 0            | 0 | 0.55007    | 0 | -0.3670863  | 0           | 0            |
| 0 | 0            | 0 | 0.16552905 | 0 | 0           | 0           | 0            |
| 0 | 0            | 0 | 0.16634064 | 0 | 0           | 0           | 0            |
| 0 | -0.2497183   | 0 | 0          | 0 | 0.16585003  | 0           | 0            |
| 0 | 0.37537218   | 0 | 0.19027914 | 0 | 0           | 0           | 0            |
| 0 | -0.24815145  | 0 | 0.55036412 | 0 | -0.36746306 | 0           | 0            |

|   |              |   |            |   |             |   |              |   |
|---|--------------|---|------------|---|-------------|---|--------------|---|
| 0 | 0            | 0 | 0.1765675  | 0 | 0           | 0 | -0.0273524   | 0 |
| 0 | 0            | 0 | 0          | 0 | 0           | 0 | 0            | 0 |
| 0 | 0            | 0 | 0          | 0 | 0.20548941  | 0 | 0            | 0 |
| 0 | -0.24710417  | 0 | 0.16533359 | 0 | 0           | 0 | 0            | 0 |
| 0 | -0.24622742  | 0 | 0.16652716 | 0 | 0           | 0 | 0            | 0 |
| 0 | 0            | 0 | 0          | 0 | 0           | 0 | 0            | 0 |
| 0 | 0.36996158   | 0 | 0          | 0 | 0           | 0 | 0            | 0 |
| 0 | -0.25358356  | 0 | 0          | 0 | 0           | 0 | 0            | 0 |
| 0 | -0.25544481  | 0 | 0.17678409 | 0 | 0           | 0 | -0.026725655 | 0 |
| 0 | 0            | 0 | 0          | 0 | 0           | 0 | 0            | 0 |
| 0 | 0            | 0 | 0          | 0 | 0           | 0 | 0            | 0 |
| 0 | 0            | 0 | 0          | 0 | 0           | 0 | 0.034142779  | 0 |
| 0 | 0            | 0 | 0          | 0 | 0.15200009  | 0 | 0            | 0 |
| 0 | 0            | 0 | 0.42147411 | 0 | -0.26025248 | 0 | 0            | 0 |
| 0 | 0            | 0 | 0          | 0 | 0.15274512  | 0 | 0            | 0 |
| 0 | -0.25456867  | 0 | 0          | 0 | 0           | 0 | 0            | 0 |
| 0 | -0.24231649  | 0 | 0          | 0 | 0           | 0 | 0.035239816  | 0 |
| 0 | -0.25107709  | 0 | 0          | 0 | 0           | 0 | 0            | 0 |
| 0 | 0            | 0 | 0          | 0 | 0.16439252  | 0 | -0.031894296 | 0 |
| 0 | 0            | 0 | 0          | 0 | 0           | 0 | 0            | 0 |
| 0 | 0.37438788   | 0 | 0          | 0 | 0.17983182  | 0 | 0            | 0 |
| 0 | -0.24784468  | 0 | 0          | 0 | 0.15179707  | 0 | 0            | 0 |
| 0 | -0.099665222 | 0 | 0          | 0 | 0           | 0 | 0            | 0 |
| 0 | -0.24683473  | 0 | 0          | 0 | 0.15291669  | 0 | 0            | 0 |
| 0 | 0            | 0 | 0          | 0 | 0           | 0 | 0            | 0 |
| 0 | 0            | 0 | 0.24845847 | 0 | 0           | 0 | 0            | 0 |
| 0 | -0.099561207 | 0 | 0          | 0 | 0           | 0 | 0            | 0 |
| 0 | -0.25762398  | 0 | 0          | 0 | 0.16458992  | 0 | -0.031273885 | 0 |
| 0 | 0            | 0 | 0          | 0 | 0           | 0 | 0            | 0 |
| 0 | 0            | 0 | 0          | 0 | 0           | 0 | 0.009378412  | 0 |
| 0 | 0            | 0 | 0          | 0 | 0           | 0 | -0.002292355 | 0 |
| 0 | 0            | 0 | 0          | 0 | 0.23918243  | 0 | 0            | 0 |
| 0 | 0            | 0 | 0          | 0 | 0           | 0 | -0.086722698 | 0 |
| 0 | -0.1428186   | 0 | 0          | 0 | 0           | 0 | -0.086852717 | 0 |
| 0 | 0            | 0 | 0          | 0 | 0           | 0 | 0            | 0 |
| 0 | -0.16508126  | 0 | 0          | 0 | 0           | 0 | 0            | 0 |
| 0 | 0.36830491   | 0 | 0          | 0 | 0           | 0 | 0            | 0 |
| 0 | 0.37101099   | 0 | 0          | 0 | 0           | 0 | 0            | 0 |
| 0 | 0            | 0 | 0          | 0 | 0           | 0 | 0            | 0 |
| 0 | 0            | 0 | 0          | 0 | 0           | 0 | 0            | 0 |
| 0 | 0            | 0 | 0          | 0 | 0           | 0 | 0            | 0 |
| 0 | 0            | 0 | 0          | 0 | 0           | 0 | 0.001858     | 0 |
| 0 | 0            | 0 | 0          | 0 | 0           | 0 | -0.00560178  | 0 |
| 0 | 0            | 0 | 0          | 0 | 0           | 0 | -0.085851722 | 0 |
| 0 | -0.25325827  | 0 | 0          | 0 | 0           | 0 | 0            | 0 |
| 0 | -0.25475426  | 0 | 0          | 0 | 0           | 0 | 0            | 0 |
| 0 | -0.2533272   | 0 | 0          | 0 | 0           | 0 | 0.00344593   | 0 |

|   |              |   |            |   |             |              |   |
|---|--------------|---|------------|---|-------------|--------------|---|
| 0 | -0.25384107  | 0 | 0          | 0 | 0           | 0            | 0 |
| 0 | 0            | 0 | 0          | 0 | 0           | 0.083089212  | 0 |
| 0 | 0.36277764   | 0 | 0          | 0 | 0           | 0            | 0 |
| 0 | -0.25374007  | 0 | 0          | 0 | 0           | -0.004899328 | 0 |
| 0 | 0            | 0 | 0.15209948 | 0 | 0           | 0.085651206  | 0 |
| 0 | 0            | 0 | 0          | 0 | 0           | 0            | 0 |
| 0 | 0            | 0 | 0          | 0 | 0           | -0.02815217  | 0 |
| 0 | 0            | 0 | 0          | 0 | 0           | 0            | 0 |
| 0 | 0            | 0 | 0          | 0 | 0           | 0.05673679   | 0 |
| 0 | 0            | 0 | 0          | 0 | 0           | 0.067037684  | 0 |
| 0 | -0.26664759  | 0 | 0          | 0 | 0           | -0.027058365 | 0 |
| 0 | 0            | 0 | 0.16097467 | 0 | 0           | 0            | 0 |
| 0 | 0.34646477   | 0 | 0          | 0 | 0           | -0.06848627  | 0 |
| 0 | 0            | 0 | 0          | 0 | 0.13888623  | 0.08405238   | 0 |
| 0 | 0.46964456   | 0 | 0          | 0 | 0           | 0            | 0 |
| 0 | 0            | 0 | 0.2910361  | 0 | 0           | 0            | 0 |
| 0 | 0            | 0 | 0          | 0 | 0           | 0            | 0 |
| 0 | 0            | 0 | 0          | 0 | 0           | 0            | 0 |
| 0 | 0            | 0 | 0.15846451 | 0 | 0           | 0            | 0 |
| 0 | 0            | 0 | 0.28564025 | 0 | 0           | 0            | 0 |
| 0 | 0            | 0 | 0          | 0 | 0.1471912   | 0            | 0 |
| 0 | 0            | 0 | 0.45953928 | 0 | -0.31910885 | 0            | 0 |
| 0 | 0            | 0 | 0.20001728 | 0 | 0           | 0            | 0 |
| 0 | 0            | 0 | 0          | 0 | 0.14503564  | 0            | 0 |
| 0 | 0            | 0 | 0.14196299 | 0 | 0           | 0            | 0 |
| 0 | 0            | 0 | 0          | 0 | 0.27952894  | 0            | 0 |
| 0 | 0            | 0 | 0.25775797 | 0 | 0           | 0.041671657  | 0 |
| 0 | 0            | 0 | 0.16612591 | 0 | 0           | 0            | 0 |
| 0 | 0            | 0 | 0          | 0 | 0.27484087  | 0            | 0 |
| 0 | 0            | 0 | 0.44700169 | 0 | -0.20202735 | 0            | 0 |
| 0 | 0            | 0 | 0.23652591 | 0 | 0           | 0            | 0 |
| 0 | 0            | 0 | 0.20857422 | 0 | 0           | 0.068789351  | 0 |
| 0 | 0            | 0 | 0.24097702 | 0 | 0           | 0            | 0 |
| 0 | -0.023869124 | 0 | 0.24292563 | 0 | 0           | 0            | 0 |
| 0 | 0            | 0 | 0.24395989 | 0 | 0           | 0            | 0 |
| 0 | 0            | 0 | 0          | 0 | 0.12900869  | 0            | 0 |
| 0 | 0            | 0 | 0          | 0 | 0.18872278  | 0            | 0 |
| 0 | -0.18808274  | 0 | 0.1660616  | 0 | 0           | 0            | 0 |
| 0 | 0            | 0 | 0.23630096 | 0 | 0           | 0            | 0 |
| 0 | 0            | 0 | 0.22533788 | 0 | 0           | 0            | 0 |
| 0 | 0            | 0 | 0.49635545 | 0 | -0.31540514 | 0            | 0 |
| 0 | 0            | 0 | 0          | 0 | 0.24886552  | 0.038366204  | 0 |
| 0 | 0            | 0 | 0          | 0 | 0.1563176   | 0            | 0 |
| 0 | 0            | 0 | 0          | 0 | 0           | 0            | 0 |
| 0 | -0.18891369  | 0 | 0          | 0 | 0.15624509  | 0            | 0 |
| 0 | 0            | 0 | 0          | 0 | 0.22497732  | 0            | 0 |
| 0 | 0            | 0 | 0          | 0 | 0.23208612  | 0            | 0 |

|   |              |   |            |   |             |             |              |
|---|--------------|---|------------|---|-------------|-------------|--------------|
| 0 | 0            | 0 | 0.22289106 | 0 | 0           | 0.033490815 | 0            |
| 0 | -0.027694914 | 0 | 0          | 0 | 0.23407551  | 0           | 0            |
| 0 | 0            | 0 | 0.43874755 | 0 | -0.22026264 | 0           | 0            |
| 0 | 0            | 0 | 0          | 0 | 0.23379996  | 0           | 0            |
| 0 | 0            | 0 | 0.20438808 | 0 | 0           | 0           | 0            |
| 0 | 0            | 0 | 0          | 0 | 0.19727614  | 0           | 0.06504361   |
| 0 | 0.010374371  | 0 | 0.22434578 | 0 | 0           | 0           | 0            |
| 0 | 0            | 0 | 0.2410492  | 0 | 0           | 0           | 0            |
| 0 | 0            | 0 | 0          | 0 | 0.22503591  | 0           | 0            |
| 0 | 0            | 0 | 0.22268272 | 0 | 0           | 0           | 0            |
| 0 | 0            | 0 | 0.17312233 | 0 | 0           | 0           | 0.058389004  |
| 0 | 0            | 0 | 0.5084369  | 0 | -0.3399108  | 0           | 0            |
| 0 | 0            | 0 | 0.50754518 | 0 | -0.33800755 | 0           | 0            |
| 0 | 0            | 0 | 0.17367408 | 0 | 0           | 0           | 0.05115683   |
| 0 | -0.2102427   | 0 | 0.24115566 | 0 | 0           | 0           | 0            |
| 0 | 0            | 0 | 0          | 0 | 0.20880988  | 0           | 0            |
| 0 | 0            | 0 | 0          | 0 | 0.21232904  | 0           | 0.031679683  |
| 0 | 0            | 0 | 0          | 0 | 0           | 0           | 0.071802922  |
| 0 | 0            | 0 | 0          | 0 | 0           | 0           | 0.070335416  |
| 0 | 0            | 0 | 0          | 0 | 0           | 0           | 0.080258697  |
| 0 | 0            | 0 | 0.55070107 | 0 | -0.35686961 | 0           | 0.002304983  |
| 0 | 0            | 0 | 0          | 0 | 0.19005557  | 0           | 0            |
| 0 | 0            | 0 | 0          | 0 | 0           | 0           | 0            |
| 0 | 0            | 0 | 0.17295603 | 0 | 0           | 0           | 0            |
| 0 | 0.007813     | 0 | 0          | 0 | 0.21369198  | 0           | 0            |
| 0 | 0            | 0 | 0          | 0 | 0.21198422  | 0           | 0            |
| 0 | 0            | 0 | 0.22859278 | 0 | 0           | 0           | 0            |
| 0 | 0            | 0 | 0          | 0 | 0.15920793  | 0           | 0.058175108  |
| 0 | 0            | 0 | 0          | 0 | 0.22806779  | 0           | 0            |
| 0 | 0            | 0 | 0          | 0 | 0.15960227  | 0           | 0.050324998  |
| 0 | -0.21732585  | 0 | 0.22909843 | 0 | 0           | 0           | 0            |
| 0 | -0.21141115  | 0 | 0          | 0 | 0.22817053  | 0           | 0            |
| 0 | 0            | 0 | 0          | 0 | 0           | 0           | 0            |
| 0 | 0            | 0 | 0          | 0 | 0           | 0           | 0            |
| 0 | 0            | 0 | 0          | 0 | 0.15908801  | 0           | 0            |
| 0 | 0            | 0 | 0          | 0 | 0           | 0           | 0            |
| 0 | 0            | 0 | 0          | 0 | 0.21653519  | 0           | 0            |
| 0 | -0.21812227  | 0 | 0          | 0 | 0.21703802  | 0           | 0            |
| 0 | 0            | 0 | 0.22734656 | 0 | 0           | 0           | 0            |
| 0 | 0            | 0 | 0.48749236 | 0 | -0.24106303 | 0           | 0            |
| 0 | 0            | 0 | 0.49432892 | 0 | -0.24627489 | 0           | 0            |
| 0 | 0            | 0 | 0          | 0 | 0           | 0           | -0.087252955 |
| 0 | 0            | 0 | 0.2508933  | 0 | 0           | 0           | -0.008388182 |
| 0 | 0            | 0 | 0.24925253 | 0 | 0           | 0           | 0            |
| 0 | 0            | 0 | 0.24991101 | 0 | 0           | 0           | 0            |
| 0 | 0.00339736   | 0 | 0.25091435 | 0 | 0           | 0           | 0            |
| 0 | 0            | 0 | 0.50340099 | 0 | -0.24183784 | 0           | -0.036861158 |

|   |              |   |            |   |             |   |              |   |
|---|--------------|---|------------|---|-------------|---|--------------|---|
| 0 | 0            | 0 | 0.18586963 | 0 | 0           | 0 | 0.073230519  | 0 |
| 0 | 0            | 0 | 0.25313145 | 0 | 0           | 0 | -0.015737742 | 0 |
| 0 | 0            | 0 | 0.2467791  | 0 | 0           | 0 | 0            | 0 |
| 0 | 0            | 0 | 0.25089821 | 0 | 0           | 0 | 0            | 0 |
| 0 | 0.002856045  | 0 | 0.25267497 | 0 | 0           | 0 | 0            | 0 |
| 0 | 0            | 0 | 0.51380103 | 0 | -0.24530872 | 0 | 0            | 0 |
| 0 | 0            | 0 | 0.26151128 | 0 | 0           | 0 | -0.03924413  | 0 |
| 0 | 0            | 0 | 0.26582677 | 0 | 0           | 0 | -0.032175658 | 0 |
| 0 | -0.009381372 | 0 | 0.26345967 | 0 | 0           | 0 | -0.039022494 | 0 |
| 0 | -0.19819808  | 0 | 0.18619225 | 0 | 0           | 0 | 0.074414872  | 0 |
| 0 | 0.61600465   | 0 | 0.27946674 | 0 | 0           | 0 | 0            | 0 |
| 0 | 0            | 0 | 0          | 0 | 0           | 0 | 0            | 0 |
| 0 | 0            | 0 | 0.2669437  | 0 | 0           | 0 | 0            | 0 |
| 0 | -0.015839434 | 0 | 0.26899597 | 0 | 0           | 0 | 0            | 0 |
| 0 | 0            | 0 | 0.2060122  | 0 | 0           | 0 | 0            | 0 |
| 0 | 0            | 0 | 0.54198344 | 0 | -0.26990674 | 0 | 0            | 0 |
| 0 | 0            | 0 | 0          | 0 | 0           | 0 | 0            | 0 |
| 0 | -0.008351911 | 0 | 0.54180743 | 0 | -0.26783835 | 0 | 0            | 0 |
| 0 | 0            | 0 | 0          | 0 | 0.21281256  | 0 | 0            | 0 |
| 0 | -0.10810253  | 0 | 0          | 0 | 0           | 0 | 0            | 0 |
| 0 | 0            | 0 | 0.19710595 | 0 | 0           | 0 | 0            | 0 |
| 0 | 0            | 0 | 0.47747382 | 0 | -0.31021405 | 0 | 0            | 0 |
| 0 | 0            | 0 | 0.1879074  | 0 | 0           | 0 | 0.046261728  | 0 |
| 0 | 0            | 0 | 0          | 0 | 0           | 0 | 0            | 0 |
| 0 | -0.18918593  | 0 | 0          | 0 | 0           | 0 | 0            | 0 |
| 0 | 0            | 0 | 0          | 0 | 0.17571271  | 0 | 0.06962578   | 0 |
| 0 | -0.21671613  | 0 | 0.19733311 | 0 | 0           | 0 | 0            | 0 |
| 0 | 0            | 0 | 0          | 0 | 0.23939371  | 0 | -0.008820308 | 0 |
| 0 | 0            | 0 | 0          | 0 | 0.23709257  | 0 | 0            | 0 |
| 0 | 0            | 0 | 0          | 0 | 0           | 0 | 0            | 0 |
| 0 | 0            | 0 | 0          | 0 | 0.23821144  | 0 | 0            | 0 |
| 0 | 0.000752938  | 0 | 0          | 0 | 0.23879164  | 0 | 0            | 0 |
| 0 | 0            | 0 | 0          | 0 | 0.24159859  | 0 | -0.016872465 | 0 |
| 0 | 0            | 0 | 0          | 0 | 0.23406901  | 0 | 0            | 0 |
| 0 | -0.19991776  | 0 | 0          | 0 | 0.17602462  | 0 | 0.07080466   | 0 |
| 0 | 0            | 0 | 0          | 0 | 0.23851595  | 0 | 0            | 0 |
| 0 | 0            | 0 | 0.18784335 | 0 | 0           | 0 | 0            | 0 |
| 0 | 8.72E-05     | 0 | 0          | 0 | 0.24035352  | 0 | 0            | 0 |
| 0 | 0            | 0 | 0.19037751 | 0 | 0           | 0 | 0            | 0 |
| 0 | 0            | 0 | 0.43286541 | 0 | -0.27802074 | 0 | 0            | 0 |
| 0 | 0.39631179   | 0 | 0.15983633 | 0 | 0           | 0 | 0            | 0 |
| 0 | 0            | 0 | 0          | 0 | 0           | 0 | 0            | 0 |
| 0 | -0.19076542  | 0 | 0          | 0 | 0           | 0 | 0            | 0 |
| 0 | 0            | 0 | 0          | 0 | 0           | 0 | 0            | 0 |
| 0 | 0            | 0 | 0          | 0 | 0.25064191  | 0 | -0.044080603 | 0 |
| 0 | 0            | 0 | 0          | 0 | 0.25616119  | 0 | -0.035643329 | 0 |
| 0 | -0.013631249 | 0 | 0          | 0 | 0.25263064  | 0 | -0.043874449 | 0 |





|   |             |   |            |   |             |            |              |
|---|-------------|---|------------|---|-------------|------------|--------------|
| 0 | 0           | 0 | 0.25309574 | 0 | 0           | 0          | 0            |
| 0 | 0           | 0 | 0          | 0 | 0           | 0.02556756 | 0            |
| 0 | 0           | 0 | 0          | 0 | 0.13823751  | 0          | 0            |
| 0 | 0           | 0 | 0          | 0 | 0           | 0          | 0            |
| 0 | 0           | 0 | 0          | 0 | 0.23065246  | 0          | 0.069338621  |
| 0 | 0           | 0 | 0.48205703 | 0 | -0.28073019 | 0          | 0.1134247    |
| 0 | 0           | 0 | 0.22759357 | 0 | 0           | 0          | 0.098243714  |
| 0 | 0           | 0 | 0.46095902 | 0 | -0.32980591 | 0          | 0            |
| 0 | -0.24881284 | 0 | 0.15034156 | 0 | 0           | 0          | 0            |
| 0 | 0           | 0 | 0          | 0 | 0           | 0          | 0.046483962  |
| 0 | 0           | 0 | 0          | 0 | 0           | 0          | 0            |
| 0 | 0.46721867  | 0 | 0          | 0 | 0           | 0          | 0            |
| 0 | 0           | 0 | 0          | 0 | 0           | 0          | 0            |
| 0 | 0           | 0 | 0.1400905  | 0 | 0           | 0          | 0.04314597   |
| 0 | 0.37694765  | 0 | 0.13681944 | 0 | 0           | 0          | 0            |
| 0 | -0.24766275 | 0 | 0          | 0 | 0.13803727  | 0          | 0            |
| 0 | 0           | 0 | 0          | 0 | 0.13701816  | 0          | 0            |
| 0 | -0.24665219 | 0 | 0.4611171  | 0 | -0.33012923 | 0          | 0            |
| 0 | -0.23460942 | 0 | 0          | 0 | 0           | 0          | 0            |
| 0 | 0           | 0 | 0          | 0 | 0           | 0          | 0            |
| 0 | 0           | 0 | 0          | 0 | 0           | 0          | 0.005093464  |
| 0 | 0           | 0 | 0          | 0 | 0           | 0          | 0            |
| 0 | 0           | 0 | 0          | 0 | 0           | 0          | 0            |
| 0 | -0.23314048 | 0 | 0.14004958 | 0 | 0           | 0          | 0.044280403  |
| 0 | 0           | 0 | 0.13435259 | 0 | 0           | 0          | 0            |
| 0 | -0.15755313 | 0 | 0          | 0 | 0           | 0          | 0            |
| 0 | -0.15330979 | 0 | 0          | 0 | 0           | 0          | 0.004916474  |
| 0 | -0.15283922 | 0 | 0          | 0 | 0           | 0          | 0            |
| 0 | 0           | 0 | 0          | 0 | 0           | 0          | 0            |
| 0 | -0.24944527 | 0 | 0          | 0 | 0.13705964  | 0          | 0            |
| 0 | 0           | 0 | 0          | 0 | 0.12738378  | 0          | 0.041466163  |
| 0 | 0.39274991  | 0 | 0          | 0 | 0           | 0          | 0            |
| 0 | 0           | 0 | 0          | 0 | 0           | 0          | 0.030535752  |
| 0 | 0.37626948  | 0 | 0          | 0 | 0.12463454  | 0          | 0            |
| 0 | 0           | 0 | 0          | 0 | 0.23996184  | 0          | 0            |
| 0 | 0           | 0 | 0          | 0 | 0           | 0          | 0            |
| 0 | 0           | 0 | 0          | 0 | 0.21527159  | 0          | 0.096183771  |
| 0 | -0.246167   | 0 | 0.13419403 | 0 | 0           | 0          | 0            |
| 0 | 0.39079613  | 0 | 0          | 0 | 0           | 0          | 0            |
| 0 | 0           | 0 | 0          | 0 | 0           | 0          | 0            |
| 0 | 0           | 0 | 0          | 0 | 0           | 0          | 0.042406398  |
| 0 | 0.046012685 | 0 | 0          | 0 | 0           | 0          | 0            |
| 0 | -0.2369406  | 0 | 0          | 0 | 0           | 0          | 0            |
| 0 | 0.39864956  | 0 | 0          | 0 | 0           | 0          | 0.025680528  |
| 0 | 0           | 0 | 0          | 0 | 0           | 0          | 0            |
| 0 | 0           | 0 | 0          | 0 | 0           | 0          | -0.009783907 |
| 0 | 0           | 0 | 0          | 0 | 0           | 0          | 0            |

|   |             |   |            |   |             |              |              |
|---|-------------|---|------------|---|-------------|--------------|--------------|
| 0 | 0.38707473  | 0 | 0          | 0 | 0           | 0            | 0            |
| 0 | 0           | 0 | 0          | 0 | 0           | 0.002264272  | 0            |
| 0 | -0.23437655 | 0 | 0          | 0 | 0.12732393  | 0            | 0.042597534  |
| 0 | 0           | 0 | 0          | 0 | 0.12162818  | 0            | 0            |
| 0 | 0           | 0 | 0.22289988 | 0 | 0           | 0            | 0            |
| 0 | 0           | 0 | 0          | 0 | 0           | 0.01332089   | 0            |
| 0 | -0.22224058 | 0 | 0          | 0 | 0           | 0.043488707  | 0            |
| 0 | -0.22959603 | 0 | 0          | 0 | 0           | 0            | 0            |
| 0 | -0.2287812  | 0 | 0          | 0 | 0           | 0.003745139  | 0            |
| 0 | 0           | 0 | 0.49527928 | 0 | -0.3246912  | 0            | 0            |
| 0 | -0.24682019 | 0 | 0          | 0 | 0.12145897  | 0            | 0            |
| 0 | -0.22725292 | 0 | 0          | 0 | 0           | 0.014058466  | 0            |
| 0 | -0.25237901 | 0 | 0.22256882 | 0 | 0           | 0            | 0            |
| 0 | 0           | 0 | 0.2028736  | 0 | 0           | 0            | 0            |
| 0 | 0.37449722  | 0 | 0.17631187 | 0 | 0           | 0            | 0            |
| 0 | -0.24903551 | 0 | 0.49552968 | 0 | -0.32505675 | 0            | 0            |
| 0 | 0           | 0 | 0.18414185 | 0 | 0           | 0.025027288  | 0            |
| 0 | 0           | 0 | 0          | 0 | 0           | 0.009702676  | 0            |
| 0 | -0.25236265 | 0 | 0.2035262  | 0 | 0           | 0            | 0            |
| 0 | 0           | 0 | 0.46011566 | 0 | -0.24797432 | 0            | 0            |
| 0 | 0           | 0 | 0          | 0 | 0.20671788  | 0            | 0            |
| 0 | -0.24164542 | 0 | 0.18446095 | 0 | 0           | 0.026237109  | 0            |
| 0 | 0           | 0 | 0          | 0 | 0           | 0.018718128  | 0            |
| 0 | 0           | 0 | 0.5102006  | 0 | -0.34971199 | 0            | 0            |
| 0 | 0           | 0 | 0.51352121 | 0 | -0.35249124 | 0            | 0            |
| 0 | 0           | 0 | 0          | 0 | 0           | 0            | 0            |
| 0 | 0.37371905  | 0 | 0          | 0 | 0.16646848  | 0            | 0            |
| 0 | 0           | 0 | 0          | 0 | 0           | 0.017152302  | 0            |
| 0 | 0.37505149  | 0 | 0.54975113 | 0 | -0.36612833 | 0            | 0            |
| 0 | 0           | 0 | 0          | 0 | 0.18888941  | 0            | 0            |
| 0 | -0.25283725 | 0 | 0          | 0 | 0.20637694  | 0            | 0            |
| 0 | 0           | 0 | 0.52468203 | 0 | -0.35354984 | 0            | -0.025059543 |
| 0 | 0.37620593  | 0 | 0.16607939 | 0 | 0           | 0            | 0            |
| 0 | 0.37707376  | 0 | 0.16642846 | 0 | 0           | 0            | 0            |
| 0 | 0           | 0 | 0          | 0 | 0.17297505  | 0            | 0.02116323   |
| 0 | -0.24741376 | 0 | 0.51028246 | 0 | -0.34999527 | 0            | 0            |
| 0 | -0.24658175 | 0 | 0.51425438 | 0 | -0.35304318 | 0            | 0            |
| 0 | -0.25273908 | 0 | 0          | 0 | 0.1895391   | 0            | 0            |
| 0 | 0.36772158  | 0 | 0.17722277 | 0 | 0           | -0.027001411 | 0            |
| 0 | 0.36905335  | 0 | 0          | 0 | 0           | 0            | 0            |
| 0 | -0.25506769 | 0 | 0.52561688 | 0 | -0.35428046 | 0            | -0.024431276 |
| 0 | 0           | 0 | 0.1648214  | 0 | 0           | 0            | 0            |
| 0 | 0           | 0 | 0.16553864 | 0 | 0           | -0.000586161 | 0            |
| 0 | -0.24361442 | 0 | 0          | 0 | 0.1732769   | 0            | 0.022367693  |
| 0 | 0           | 0 | 0.16631419 | 0 | 0           | -0.004924922 | 0            |
| 0 | 0           | 0 | 0          | 0 | 0           | 0.009046263  | 0            |
| 0 | 0           | 0 | 0          | 0 | 0           | 0            | 0            |

|   |              |            |   |             |   |              |   |
|---|--------------|------------|---|-------------|---|--------------|---|
| 0 | 0            | 0          | 0 | 0           | 0 | 0            | 0 |
| 0 | 0.36829027   | 0          | 0 | 0           | 0 | 0            | 0 |
| 0 | 0.37157576   | 0          | 0 | 0           | 0 | 0            | 0 |
| 0 | 0            | 0.19685907 | 0 | 0           | 0 | 0            | 0 |
| 0 | 0.38011343   | 0          | 0 | 0           | 0 | 0.034416686  | 0 |
| 0 | -0.24687653  | 0.16482829 | 0 | 0           | 0 | 0            | 0 |
| 0 | -0.2467769   | 0.16531758 | 0 | 0           | 0 | 0.001097298  | 0 |
| 0 | 0.37547782   | 0          | 0 | 0.1525514   | 0 | 0            | 0 |
| 0 | 0.37690394   | 0          | 0 | 0.15282994  | 0 | 0            | 0 |
| 0 | -0.24756017  | 0.16650871 | 0 | 0           | 0 | -0.00419803  | 0 |
| 0 | 0            | 0          | 0 | 0           | 0 | 0            | 0 |
| 0 | 0            | 0          | 0 | 0           | 0 | -0.030460541 | 0 |
| 0 | 0            | 0          | 0 | 0           | 0 | 0.02509125   | 0 |
| 0 | -0.045964715 | 0          | 0 | 0           | 0 | 0            | 0 |
| 0 | 0            | 0          | 0 | 0           | 0 | 0.021625384  | 0 |
| 0 | 0            | 0          | 0 | 0           | 0 | 0            | 0 |
| 0 | -0.25033934  | 0          | 0 | 0           | 0 | 0.010674313  | 0 |
| 0 | -0.25333933  | 0          | 0 | 0           | 0 | 0            | 0 |
| 0 | -0.25357328  | 0          | 0 | 0           | 0 | 0            | 0 |
| 0 | 0.52031325   | 0          | 0 | 0           | 0 | 0            | 0 |
| 0 | 0.36548334   | 0          | 0 | 0.16505657  | 0 | -0.031534181 | 0 |
| 0 | 0            | 0          | 0 | 0.15115895  | 0 | 0            | 0 |
| 0 | 0            | 0          | 0 | 0.15201946  | 0 | -0.000952601 | 0 |
| 0 | 0.52027746   | 0          | 0 | 0           | 0 | 0            | 0 |
| 0 | 0            | 0          | 0 | 0.15275521  | 0 | -0.00588162  | 0 |
| 0 | -0.24372055  | 0          | 0 | 0           | 0 | 0.026361626  | 0 |
| 0 | -0.24743353  | 0          | 0 | 0           | 0 | 0.022431329  | 0 |
| 0 | -0.25305774  | 0          | 0 | 0           | 0 | 0            | 0 |
| 0 | 0            | 0          | 0 | 0           | 0 | 0            | 0 |
| 0 | 0            | 0.49318532 | 0 | -0.24927002 | 0 | 0            | 0 |
| 0 | 0            | 0.23997602 | 0 | 0           | 0 | -0.038750023 | 0 |
| 0 | 0            | 0.22610098 | 0 | 0           | 0 | 0            | 0 |
| 0 | 0            | 0          | 0 | 0.18212964  | 0 | 0            | 0 |
| 0 | 0            | 0          | 0 | 0           | 0 | -0.003157312 | 0 |
| 0 | -0.097624525 | 0          | 0 | 0           | 0 | 0            | 0 |
| 0 | 0            | 0.2320972  | 0 | 0           | 0 | 0            | 0 |
| 0 | -0.24755976  | 0          | 0 | 0.15115719  | 0 | 0            | 0 |
| 0 | -0.24762786  | 0          | 0 | 0.15178375  | 0 | 0.000724892  | 0 |
| 0 | -0.24846928  | 0          | 0 | 0.15292429  | 0 | -0.005157824 | 0 |
| 0 | -0.10022316  | 0          | 0 | 0           | 0 | -0.002133412 | 0 |
| 0 | 0            | 0          | 0 | 0           | 0 | -0.013337564 | 0 |
| 0 | 0.03130446   | 0.25574267 | 0 | 0           | 0 | 0            | 0 |
| 0 | 0            | 0.25383584 | 0 | 0           | 0 | 0            | 0 |
| 0 | -0.10277714  | 0          | 0 | 0           | 0 | -0.01268806  | 0 |
| 0 | 0            | 0          | 0 | 0           | 0 | 0.012842626  | 0 |
| 0 | 0            | 0          | 0 | 0.21324122  | 0 | 0            | 0 |
| 0 | 0            | 0          | 0 | 0.23014404  | 0 | -0.042054838 | 0 |

|   |              |   |            |   |             |   |              |   |
|---|--------------|---|------------|---|-------------|---|--------------|---|
| 0 | 0            | 0 | 0          | 0 | 0.22029023  | 0 | 0            | 0 |
| 0 | 0.025961642  | 0 | 0          | 0 | 0.24530463  | 0 | 0            | 0 |
| 0 | 0            | 0 | 0          | 0 | 0.24336457  | 0 | 0            | 0 |
| 0 | 0.47712103   | 0 | 0          | 0 | 0           | 0 | -0.086795044 | 0 |
| 0 | 0            | 0 | 0          | 0 | 0           | 0 | -0.071307602 | 0 |
| 0 | -0.14825234  | 0 | 0          | 0 | 0           | 0 | -0.072018629 | 0 |
| 0 | 0.45482761   | 0 | 0          | 0 | 0           | 0 | 0            | 0 |
| 0 | 0.37012482   | 0 | 0          | 0 | 0           | 0 | 0            | 0 |
| 0 | 0.13115919   | 0 | 0          | 0 | 0           | 0 | 0            | 0 |
| 0 | 0.36979573   | 0 | 0          | 0 | 0           | 0 | 0            | 0 |
| 0 | 0.36793162   | 0 | 0          | 0 | 0           | 0 | 0            | 0 |
| 0 | 0.36895975   | 0 | 0          | 0 | 0           | 0 | 0.00219577   | 0 |
| 0 | 0.36985659   | 0 | 0          | 0 | 0           | 0 | -0.004165896 | 0 |
| 0 | 0            | 0 | 0          | 0 | 0           | 0 | 0            | 0 |
| 0 | 0            | 0 | 0.48951686 | 0 | -0.34279866 | 0 | 0.087521495  | 0 |
| 0 | 0            | 0 | 0          | 0 | 0           | 0 | 0            | 0 |
| 0 | 0            | 0 | 0          | 0 | 0           | 0 | 0.004858665  | 0 |
| 0 | 0            | 0 | 0          | 0 | 0           | 0 | 0.001865928  | 0 |
| 0 | 0            | 0 | 0          | 0 | 0           | 0 | -0.002238601 | 0 |
| 0 | 0            | 0 | 0.20509271 | 0 | 0           | 0 | 0            | 0 |
| 0 | 0            | 0 | 0          | 0 | 0           | 0 | 0.061534276  | 0 |
| 0 | 0            | 0 | 0.15905223 | 0 | 0           | 0 | 0.06601181   | 0 |
| 0 | 0.35576026   | 0 | 0          | 0 | 0           | 0 | -0.028039533 | 0 |
| 0 | -0.25134031  | 0 | 0          | 0 | 0           | 0 | 0.00628736   | 0 |
| 0 | -0.25360991  | 0 | 0          | 0 | 0           | 0 | 0            | 0 |
| 0 | -0.25372259  | 0 | 0          | 0 | 0           | 0 | 0.00345086   | 0 |
| 0 | 0            | 0 | 0          | 0 | 0           | 0 | 0.075601713  | 0 |
| 0 | 0            | 0 | 0.15991543 | 0 | 0           | 0 | 0.094178436  | 0 |
| 0 | -0.25424896  | 0 | 0          | 0 | 0           | 0 | -0.001349809 | 0 |
| 0 | 0            | 0 | 0.15638231 | 0 | 0           | 0 | 0.076485938  | 0 |
| 0 | 0            | 0 | 0.4903097  | 0 | -0.33445143 | 0 | 0            | 0 |
| 0 | 0            | 0 | 0          | 0 | 0           | 0 | -0.01523363  | 0 |
| 0 | 0            | 0 | 0          | 0 | 0           | 0 | 0            | 0 |
| 0 | 0            | 0 | 0          | 0 | 0           | 0 | 0            | 0 |
| 0 | 0            | 0 | 0          | 0 | 0           | 0 | 0.059183679  | 0 |
| 0 | 0            | 0 | 0          | 0 | 0           | 0 | 0            | 0 |
| 0 | 0            | 0 | 0.27420526 | 0 | 0           | 0 | 0            | 0 |
| 0 | 0            | 0 | 0          | 0 | 0.18817357  | 0 | 0            | 0 |
| 0 | 0            | 0 | 0          | 0 | 0.14503651  | 0 | 0.065925212  | 0 |
| 0 | 0            | 0 | 0.16086341 | 0 | 0           | 0 | 0            | 0 |
| 0 | 0            | 0 | 0.47945633 | 0 | -0.32607602 | 0 | 0            | 0 |
| 0 | 0            | 0 | 0          | 0 | 0.14619075  | 0 | 0.091745881  | 0 |
| 0 | 0            | 0 | 0.27956637 | 0 | 0           | 0 | 0            | 0 |
| 0 | 0            | 0 | 0          | 0 | 0.14251159  | 0 | 0.076130315  | 0 |
| 0 | -0.056149919 | 0 | 0.28113605 | 0 | 0           | 0 | 0            | 0 |
| 0 | 0            | 0 | 0.49707725 | 0 | -0.20951757 | 0 | 0            | 0 |
| 0 | 0            | 0 | 0.27147056 | 0 | 0           | 0 | 0            | 0 |

|   |              |   |            |   |             |             |   |
|---|--------------|---|------------|---|-------------|-------------|---|
| 0 | 0            | 0 | 0.29333049 | 0 | 0           | 0           | 0 |
| 0 | 0            | 0 | 0.29098544 | 0 | 0           | 0.000763832 | 0 |
| 0 | 0            | 0 | 0.17368318 | 0 | 0           | 0           | 0 |
| 0 | 0            | 0 | 0.27497206 | 0 | 0           | 0           | 0 |
| 0 | 0            | 0 | 0.48574749 | 0 | -0.20365408 | 0           | 0 |
| 0 | -0.050051744 | 0 | 0.27648793 | 0 | 0           | 0           | 0 |
| 0 | 0            | 0 | 0.28527488 | 0 | 0           | 0.011118345 | 0 |
| 0 | 0            | 0 | 0.46209622 | 0 | -0.3266099  | 0           | 0 |
| 0 | 0            | 0 | 0          | 0 | 0.14695754  | 0           | 0 |
| 0 | 0            | 0 | 0          | 0 | 0.26190306  | 0           | 0 |
| 0 | 0            | 0 | 0.44981462 | 0 | -0.25492698 | 0           | 0 |
| 0 | 0.068442636  | 0 | 0.21065864 | 0 | 0           | 0           | 0 |
| 0 | 0            | 0 | 0.20929993 | 0 | 0           | 0           | 0 |
| 0 | 0            | 0 | 0          | 0 | 0.2674148   | 0           | 0 |
| 0 | 0            | 0 | 0          | 0 | 0.15838882  | 0           | 0 |
| 0 | 0            | 0 | 0.20395732 | 0 | 0           | 0           | 0 |
| 0 | 0            | 0 | 0.47699059 | 0 | -0.31608441 | 0           | 0 |
| 0 | 0            | 0 | 0.20385677 | 0 | 0           | 0           | 0 |
| 0 | 0            | 0 | 0.19917885 | 0 | 0           | -0.00618733 | 0 |
| 0 | -0.058184999 | 0 | 0          | 0 | 0.26902601  | 0           | 0 |
| 0 | 0            | 0 | 0.46860448 | 0 | -0.2143563  | 0.042772954 | 0 |
| 0 | 0            | 0 | 0.52316514 | 0 | -0.31975327 | 0.068868306 | 0 |
| 0 | 0            | 0 | 0          | 0 | 0.25966291  | 0           | 0 |
| 0 | 0            | 0 | 0.19094199 | 0 | 0           | 0           | 0 |
| 0 | 0.43440753   | 0 | 0.16662573 | 0 | 0           | 0           | 0 |
| 0 | 0            | 0 | 0.24773444 | 0 | 0           | 0.046876048 | 0 |
| 0 | 0.5960027    | 0 | 0.24210027 | 0 | 0           | 0           | 0 |
| 0 | 0            | 0 | 0          | 0 | 0.28168465  | 0           | 0 |
| 0 | 0            | 0 | 0.25045605 | 0 | 0           | 0.041338946 | 0 |
| 0 | -0.18820101  | 0 | 0.47709859 | 0 | -0.31626185 | 0           | 0 |
| 0 | 0            | 0 | 0          | 0 | 0.27952256  | 8.88E-05    | 0 |
| 0 | -0.022411404 | 0 | 0.25241727 | 0 | 0           | 0.041438744 | 0 |
| 0 | 0            | 0 | 0.18836615 | 0 | 0           | 0           | 0 |
| 0 | 0            | 0 | 0.19298134 | 0 | 0           | 0           | 0 |
| 0 | 0            | 0 | 0          | 0 | 0.26349178  | 0           | 0 |
| 0 | 0            | 0 | 0.46777455 | 0 | -0.2350467  | 0           | 0 |
| 0 | -0.052375489 | 0 | 0          | 0 | 0.26505579  | 0           | 0 |
| 0 | -0.18305924  | 0 | 0.19116556 | 0 | 0           | 0           | 0 |
| 0 | 0            | 0 | 0.44662733 | 0 | -0.21012985 | 0           | 0 |
| 0 | 0            | 0 | 0.17121579 | 0 | 0           | 0.015021394 | 0 |
| 0 | -0.027124534 | 0 | 0.44673674 | 0 | -0.20825    | 0           | 0 |
| 0 | 0.065359761  | 0 | 0          | 0 | 0.19910953  | 0           | 0 |
| 0 | 0            | 0 | 0          | 0 | 0.27444008  | 0.009743899 | 0 |
| 0 | 0            | 0 | 0.44259117 | 0 | -0.20241145 | 0           | 0 |
| 0 | -0.19119071  | 0 | 0.18879898 | 0 | 0           | 0           | 0 |
| 0 | 0            | 0 | 0.2243659  | 0 | 0           | 0.059280403 | 0 |
| 0 | -0.19105646  | 0 | 0.19261412 | 0 | 0           | 0           | 0 |

|   |              |   |            |   |             |   |              |   |
|---|--------------|---|------------|---|-------------|---|--------------|---|
| 0 | 0            | 0 | 0          | 0 | 0.19771514  | 0 | 0            | 0 |
| 0 | 0            | 0 | 0.23771993 | 0 | 0           | 0 | 0            | 0 |
| 0 | 0            | 0 | 0          | 0 | 0           | 0 | 0            | 0 |
| 0 | 0.007512661  | 0 | 0.23804802 | 0 | 0           | 0 | 0            | 0 |
| 0 | 0            | 0 | 0.23671902 | 0 | 0           | 0 | -0.002297004 | 0 |
| 0 | 0            | 0 | 0.23638209 | 0 | 0           | 0 | 0            | 0 |
| 0 | 0            | 0 | 0.21042447 | 0 | 0           | 0 | 0.067666682  | 0 |
| 0 | 0            | 0 | 0.45995136 | 0 | -0.22739254 | 0 | 0            | 0 |
| 0 | 0            | 0 | 0.23906875 | 0 | 0           | 0 | 0            | 0 |
| 0 | -0.021311412 | 0 | 0.24049358 | 0 | 0           | 0 | 0            | 0 |
| 0 | -0.18379673  | 0 | 0.17151466 | 0 | 0           | 0 | 0.016072229  | 0 |
| 0 | 0            | 0 | 0.52216872 | 0 | -0.30360367 | 0 | 0            | 0 |
| 0 | 0            | 0 | 0          | 0 | 0.18761265  | 0 | -0.008561737 | 0 |
| 0 | 0            | 0 | 0          | 0 | 0.19058605  | 0 | 0            | 0 |
| 0 | 0            | 0 | 0          | 0 | 0.18909788  | 0 | 0            | 0 |
| 0 | 0.43358334   | 0 | 0          | 0 | 0.15681797  | 0 | 0            | 0 |
| 0 | 0            | 0 | 0.23555831 | 0 | 0           | 0 | 0.008464168  | 0 |
| 0 | 0.007472997  | 0 | 0.23781258 | 0 | 0           | 0 | 0            | 0 |
| 0 | 0            | 0 | 0.23632034 | 0 | 0           | 0 | 0            | 0 |
| 0 | 0            | 0 | 0          | 0 | 0.17789629  | 0 | 0            | 0 |
| 0 | 0.59216061   | 0 | 0          | 0 | 0.23323422  | 0 | 0            | 0 |
| 0 | 0            | 0 | 0          | 0 | 0.174381    | 0 | 0            | 0 |
| 0 | 0            | 0 | 0.50735462 | 0 | -0.30949134 | 0 | 0            | 0 |
| 0 | 0            | 0 | 0          | 0 | 0.23695711  | 0 | 0.044618848  | 0 |
| 0 | 0            | 0 | 0          | 0 | 0.17668781  | 0 | 0            | 0 |
| 0 | 0            | 0 | 0          | 0 | 0.24044858  | 0 | 0.038047201  | 0 |
| 0 | 0            | 0 | 0          | 0 | 0           | 0 | -0.039475522 | 0 |
| 0 | -0.02657076  | 0 | 0          | 0 | 0.24245044  | 0 | 0.038132889  | 0 |
| 0 | -0.18459644  | 0 | 0          | 0 | 0.17810965  | 0 | 0            | 0 |
| 0 | 0            | 0 | 0          | 0 | 0.16009722  | 0 | 0.011198748  | 0 |
| 0 | 0            | 0 | 0.2242315  | 0 | 0           | 0 | 0            | 0 |
| 0 | 0            | 0 | 0.45163125 | 0 | -0.23265195 | 0 | 0.035179108  | 0 |
| 0 | 0            | 0 | 0.51651269 | 0 | -0.34858577 | 0 | 0.05988614   | 0 |
| 0 | -0.1914699   | 0 | 0          | 0 | 0.17480873  | 0 | 0            | 0 |
| 0 | 0.62644811   | 0 | 0.22311931 | 0 | 0           | 0 | 0            | 0 |
| 0 | 0            | 0 | 0.5211512  | 0 | -0.35294349 | 0 | 0.053168275  | 0 |
| 0 | -0.1911903   | 0 | 0          | 0 | 0.17631485  | 0 | 0            | 0 |
| 0 | 0            | 0 | 0.51425313 | 0 | -0.277696   | 0 | 0            | 0 |
| 0 | 0.010337853  | 0 | 0          | 0 | 0           | 0 | 0            | 0 |
| 0 | 0.41231715   | 0 | 0.24163216 | 0 | 0           | 0 | 0            | 0 |
| 0 | 0            | 0 | 0          | 0 | 0           | 0 | 0            | 0 |
| 0 | -0.18566271  | 0 | 0          | 0 | 0.16038278  | 0 | 0.012243938  | 0 |
| 0 | 0            | 0 | 0          | 0 | 0.22609759  | 0 | 0            | 0 |
| 0 | 0            | 0 | 0          | 0 | 0.22845876  | 0 | 0            | 0 |
| 0 | 0.004857404  | 0 | 0          | 0 | 0.22598506  | 0 | 0            | 0 |
| 0 | 0            | 0 | 0          | 0 | 0.22521377  | 0 | -0.002606665 | 0 |
| 0 | 0            | 0 | 0          | 0 | 0.22427352  | 0 | 0            | 0 |

|   |              |   |            |   |             |              |              |
|---|--------------|---|------------|---|-------------|--------------|--------------|
| 0 | 0.018642218  | 0 | 0.22674484 | 0 | 0           | 0.034815112  | 0            |
| 0 | 0            | 0 | 0.2250609  | 0 | 0           | 0.034242703  | 0            |
| 0 | -0.02327506  | 0 | 0          | 0 | 0.22992369  | 0            | 0            |
| 0 | 0            | 0 | 0          | 0 | 0.20756669  | 0            | 0.058836837  |
| 0 | 0.006336631  | 0 | 0.43842834 | 0 | -0.21861449 | 0            | 0            |
| 0 | 0            | 0 | 0.4388438  | 0 | -0.22073212 | 0            | 0            |
| 0 | 0            | 0 | 0          | 0 | 0.19567572  | 0            | 0.066013762  |
| 0 | -0.21081512  | 0 | 0.51438107 | 0 | -0.27771599 | 0            | 0            |
| 0 | 0            | 0 | 0.24397693 | 0 | 0           | 0            | 0            |
| 0 | 0            | 0 | 0.23744281 | 0 | 0           | 0            | 0            |
| 0 | 0            | 0 | 0          | 0 | 0.22428492  | 0            | 0.007789993  |
| 0 | 0            | 0 | 0.24104392 | 0 | 0           | -2.57E-06    | 0            |
| 0 | 0.004952715  | 0 | 0          | 0 | 0.22606214  | 0            | 0            |
| 0 | 0            | 0 | 0          | 0 | 0.2245176   | 0            | 0            |
| 0 | 0            | 0 | 0.17074117 | 0 | 0           | 0.060731877  | 0            |
| 0 | 0            | 0 | 0.50647827 | 0 | -0.33861631 | 0            | 0            |
| 0 | 0            | 0 | 0          | 0 | 0           | -0.053335579 | 0            |
| 0 | -0.2109203   | 0 | 0.24430875 | 0 | 0           | 0            | 0            |
| 0 | -0.21124908  | 0 | 0.23771362 | 0 | 0           | 0            | 0            |
| 0 | -0.20976934  | 0 | 0.24114471 | 0 | 0           | 0.001566776  | 0            |
| 0 | 0.62676694   | 0 | 0          | 0 | 0.2124425   | 0            | 0            |
| 0 | 0            | 0 | 0          | 0 | 0.2073695   | 0            | 0            |
| 0 | 0.015430257  | 0 | 0          | 0 | 0.21559867  | 0            | 0.032746175  |
| 0 | 0            | 0 | 0          | 0 | 0           | 0.07275479   | 0            |
| 0 | 0            | 0 | 0          | 0 | 0.21417043  | 0            | 0.032204642  |
| 0 | 0            | 0 | 0          | 0 | 0           | 0.076905091  | 0            |
| 0 | 0            | 0 | 0.49614247 | 0 | -0.27213441 | 0            | 0            |
| 0 | 0            | 0 | 0          | 0 | 0           | 0.070126552  | 0            |
| 0 | 0            | 0 | 0          | 0 | 0           | 0            | 0            |
| 0 | 0.41115605   | 0 | 0          | 0 | 0.2286532   | 0            | 0            |
| 0 | -0.030311605 | 0 | 0          | 0 | 0           | 0            | 0            |
| 0 | 0.40543726   | 0 | 0.22838066 | 0 | 0           | 0            | 0            |
| 0 | -0.21790056  | 0 | 0.4966278  | 0 | -0.27211545 | 0            | 0            |
| 0 | 0            | 0 | 0          | 0 | 0.15664338  | 0            | 0.060669723  |
| 0 | 0            | 0 | 0.22934015 | 0 | 0           | 0            | 0.020124561  |
| 0 | 0            | 0 | 0          | 0 | 0.23085056  | 0            | 0            |
| 0 | 0            | 0 | 0.23279348 | 0 | 0           | 0            | 0            |
| 0 | 0            | 0 | 0          | 0 | 0.22351326  | 0            | 0            |
| 0 | 0            | 0 | 0          | 0 | 0.22807622  | 0            | -0.000648128 |
| 0 | -0.21032041  | 0 | 0.22986883 | 0 | 0           | 0.020866145  | 0            |
| 0 | -0.21596289  | 0 | 0.23330908 | 0 | 0           | 0            | 0            |
| 0 | -0.21205097  | 0 | 0          | 0 | 0.23118117  | 0            | 0            |
| 0 | -0.21268557  | 0 | 0          | 0 | 0.223779    | 0            | 0            |
| 0 | -0.21113227  | 0 | 0          | 0 | 0.22815969  | 0            | 0.000917013  |
| 0 | 0            | 0 | 0          | 0 | 0           | 0            | 0            |
| 0 | 0.40463489   | 0 | 0          | 0 | 0.21633609  | 0            | 0            |
| 0 | 0            | 0 | 0          | 0 | 0.21713605  | 0            | 0.018757504  |



|   |              |   |            |   |             |   |              |   |
|---|--------------|---|------------|---|-------------|---|--------------|---|
| 0 | 0            | 0 | 0          | 0 | 0.21947872  | 0 | 0            | 0 |
| 0 | 0            | 0 | 0          | 0 | 0           | 0 | -0.078254382 | 0 |
| 0 | -0.21158873  | 0 | 0          | 0 | 0.21765489  | 0 | 0.019499244  | 0 |
| 0 | -0.089368731 | 0 | 0          | 0 | 0           | 0 | -0.07894908  | 0 |
| 0 | -0.21716933  | 0 | 0          | 0 | 0.21999062  | 0 | 0            | 0 |
| 0 | 0            | 0 | 0.4768585  | 0 | -0.25503652 | 0 | 0            | 0 |
| 0 | 0.62326251   | 0 | 0.25033444 | 0 | 0           | 0 | 0            | 0 |
| 0 | 0.053593668  | 0 | 0.22810172 | 0 | 0           | 0 | 0            | 0 |
| 0 | 0            | 0 | 0.22789858 | 0 | 0           | 0 | 0            | 0 |
| 0 | 0.62260579   | 0 | 0.25141865 | 0 | 0           | 0 | 0            | 0 |
| 0 | 0            | 0 | 0.47069557 | 0 | -0.28923199 | 0 | 0.073850792  | 0 |
| 0 | 0            | 0 | 0.22759429 | 0 | 0           | 0 | -0.013143854 | 0 |
| 0 | 0            | 0 | 0.22624446 | 0 | 0           | 0 | 0            | 0 |
| 0 | 0.42410851   | 0 | 0.18644025 | 0 | 0           | 0 | 0.07351548   | 0 |
| 0 | 0            | 0 | 0.486304   | 0 | -0.23930529 | 0 | -0.006787718 | 0 |
| 0 | 0            | 0 | 0.48799844 | 0 | -0.2434801  | 0 | 0            | 0 |
| 0 | 0            | 0 | 0.48725066 | 0 | -0.24116683 | 0 | 0            | 0 |
| 0 | -0.001003046 | 0 | 0.48751261 | 0 | -0.24129088 | 0 | 0            | 0 |
| 0 | 0            | 0 | 0.20554803 | 0 | 0           | 0 | 0.060730059  | 0 |
| 0 | 0            | 0 | 0.49419576 | 0 | -0.25269032 | 0 | 0            | 0 |
| 0 | 0            | 0 | 0.49079437 | 0 | -0.24175712 | 0 | -0.013793137 | 0 |
| 0 | 0.6104113    | 0 | 0.26258293 | 0 | 0           | 0 | -0.039140526 | 0 |
| 0 | 0            | 0 | 0.49488849 | 0 | -0.24898619 | 0 | 0            | 0 |
| 0 | -0.001594669 | 0 | 0.49442297 | 0 | -0.24669874 | 0 | 0            | 0 |
| 0 | -0.1985453   | 0 | 0.47117604 | 0 | -0.28939342 | 0 | 0.075032518  | 0 |
| 0 | 0            | 0 | 0.50334935 | 0 | -0.24691393 | 0 | -0.037399151 | 0 |
| 0 | 0.60388733   | 0 | 0.26809112 | 0 | 0           | 0 | 0            | 0 |
| 0 | 0            | 0 | 0.24950135 | 0 | 0           | 0 | -0.009130389 | 0 |
| 0 | 0            | 0 | 0.25069803 | 0 | 0           | 0 | -0.00819953  | 0 |
| 0 | 0.001285908  | 0 | 0.25114388 | 0 | 0           | 0 | -0.008256045 | 0 |
| 0 | -0.013314847 | 0 | 0.50338503 | 0 | -0.24496126 | 0 | -0.037189859 | 0 |
| 0 | 0            | 0 | 0.50180895 | 0 | -0.24004724 | 0 | -0.031354242 | 0 |
| 0 | 0            | 0 | 0.24895974 | 0 | 0           | 0 | 0            | 0 |
| 0 | 0.003455402  | 0 | 0.25062577 | 0 | 0           | 0 | 0            | 0 |
| 0 | 0            | 0 | 0.24574862 | 0 | 0           | 0 | -0.021348646 | 0 |
| 0 | -0.19695933  | 0 | 0.20594548 | 0 | 0           | 0 | 0.061860752  | 0 |
| 0 | 0            | 0 | 0.49917349 | 0 | -0.29923305 | 0 | 0            | 0 |
| 0 | 0.61145924   | 0 | 0.54135079 | 0 | -0.26821014 | 0 | 0            | 0 |
| 0 | 0.5119675    | 0 | 0          | 0 | 0           | 0 | 0            | 0 |
| 0 | 0            | 0 | 0.25116701 | 0 | 0           | 0 | -0.016622986 | 0 |
| 0 | -0.001102831 | 0 | 0.25291475 | 0 | 0           | 0 | -0.015838307 | 0 |
| 0 | 0.013829783  | 0 | 0.24825939 | 0 | 0           | 0 | 0            | 0 |
| 0 | 0            | 0 | 0.24714365 | 0 | 0           | 0 | 0            | 0 |
| 0 | 0            | 0 | 0.51268083 | 0 | -0.2509882  | 0 | 0            | 0 |
| 0 | -0.019345209 | 0 | 0.51304572 | 0 | -0.24926122 | 0 | 0            | 0 |
| 0 | 0.43329054   | 0 | 0          | 0 | 0           | 0 | 0            | 0 |
| 0 | 0            | 0 | 0.4948402  | 0 | -0.3121604  | 0 | 0.046185747  | 0 |

|   |              |   |            |   |             |              |              |
|---|--------------|---|------------|---|-------------|--------------|--------------|
| 0 | 0            | 0 | 0.26104131 | 0 | 0           | -0.031312465 | 0            |
| 0 | 0            | 0 | 0.46075642 | 0 | -0.26866276 | 0            | 0            |
| 0 | 0.40582636   | 0 | 0.1976431  | 0 | 0           | 0            | 0            |
| 0 | -0.012172092 | 0 | 0.26302593 | 0 | 0           | -0.031665638 | 0            |
| 0 | 0            | 0 | 0.21016945 | 0 | 0           | 0.031054116  | 0            |
| 0 | 0.055566464  | 0 | 0          | 0 | 0.21382184  | 0            | 0            |
| 0 | 0.42239377   | 0 | 0          | 0 | 0.17628319  | 0            | 0.069903973  |
| 0 | 0            | 0 | 0.19648642 | 0 | 0           | 0            | 0            |
| 0 | 0            | 0 | 0          | 0 | 0.21357269  | 0            | 0            |
| 0 | 0.076127513  | 0 | 0          | 0 | 0           | 0            | 0            |
| 0 | 0.62061237   | 0 | 0          | 0 | 0.23819466  | 0            | 0            |
| 0 | 0            | 0 | 0          | 0 | 0           | 0            | 0            |
| 0 | 0            | 0 | 0.20481768 | 0 | 0           | 0            | 0            |
| 0 | 0            | 0 | 0          | 0 | 0           | 0            | 0            |
| 0 | 0            | 0 | 0          | 0 | 0.21316514  | 0            | -0.014006443 |
| 0 | 0            | 0 | 0          | 0 | 0           | 0            | 0.002823035  |
| 0 | 0            | 0 | 0          | 0 | 0           | 0            | 0            |
| 0 | 0            | 0 | 0          | 0 | 0.19321818  | 0            | 0.058481597  |
| 0 | 0            | 0 | 0          | 0 | 0.21141915  | 0            | 0            |
| 0 | 0.43178851   | 0 | 0          | 0 | 0           | 0            | 0            |
| 0 | -0.21746651  | 0 | 0.46086164 | 0 | -0.26853417 | 0            | 0            |
| 0 | 0.61980005   | 0 | 0          | 0 | 0.23909616  | 0            | 0            |
| 0 | 0            | 0 | 0.48642534 | 0 | -0.30521393 | 0            | 0            |
| 0 | 0            | 0 | 0.48830346 | 0 | -0.30506636 | 0            | 0            |
| 0 | 0            | 0 | 0          | 0 | 0           | 0            | 0            |
| 0 | 0            | 0 | 0.19205756 | 0 | 0           | 0            | 0.043723535  |
| 0 | -0.1856728   | 0 | 0          | 0 | 0           | 0            | 0            |
| 0 | 0            | 0 | 0.18998754 | 0 | 0           | 0            | 0.045046641  |
| 0 | 0            | 0 | 0          | 0 | 0           | 0            | -0.005410114 |
| 0 | 0.39574024   | 0 | 0.43255614 | 0 | -0.27722422 | 0            | 0            |
| 0 | -0.18789257  | 0 | 0          | 0 | 0           | 0            | 0.004245807  |
| 0 | -0.18907328  | 0 | 0          | 0 | 0           | 0            | 0            |
| 0 | -0.19883972  | 0 | 0          | 0 | 0.19360408  | 0            | 0.05960836   |
| 0 | 0.60614128   | 0 | 0          | 0 | 0.25174162  | 0            | -0.043984903 |
| 0 | 0            | 0 | 0          | 0 | 0           | 0            | 0            |
| 0 | 0            | 0 | 0          | 0 | 0           | 0            | -0.010474224 |
| 0 | 0            | 0 | 0          | 0 | 0.23739628  | 0            | -0.009833972 |
| 0 | 0            | 0 | 0          | 0 | 0.23906123  | 0            | -0.008505939 |
| 0 | -0.001509291 | 0 | 0          | 0 | 0.23908843  | 0            | -0.008970922 |
| 0 | 0            | 0 | 0          | 0 | 0.23666792  | 0            | 0            |
| 0 | 0.000833739  | 0 | 0          | 0 | 0.23838329  | 0            | 0            |
| 0 | 0.4221753    | 0 | 0          | 0 | 0           | 0            | 0            |
| 0 | 0            | 0 | 0          | 0 | 0.23310553  | 0            | -0.023159935 |
| 0 | 0.40474068   | 0 | 0          | 0 | 0.18609739  | 0            | 0            |
| 0 | 0            | 0 | 0          | 0 | 0.23896046  | 0            | -0.018009648 |
| 0 | 0.59852822   | 0 | 0          | 0 | 0.25766914  | 0            | 0            |
| 0 | -0.004144323 | 0 | 0          | 0 | 0.24076847  | 0            | -0.017242281 |



|   |              |   |            |   |             |             |             |
|---|--------------|---|------------|---|-------------|-------------|-------------|
| 0 | 0            | 0 | 0          | 0 | 0           | 0.003887923 | 0           |
| 0 | -0.1000648   | 0 | 0          | 0 | 0           | 0.030150067 | 0           |
| 0 | 0            | 0 | 0.48260557 | 0 | -0.33741142 | 0           | 0           |
| 0 | -0.088928642 | 0 | 0          | 0 | 0           | 0           | 0           |
| 0 | -0.088292375 | 0 | 0          | 0 | 0           | 0.004929647 | 0           |
| 0 | -0.25174341  | 0 | 0          | 0 | 0.18547794  | 0           | 0           |
| 0 | 0            | 0 | 0          | 0 | 0.24405511  | 0           | 0.048561404 |
| 0 | 0            | 0 | 0          | 0 | 0.24200821  | 0           | 0.049806238 |
| 0 | 0            | 0 | 0.15246129 | 0 | 0           | 0           | 0           |
| 0 | 0            | 0 | 0.1516998  | 0 | 0           | 0           | 0.006281727 |
| 0 | 0            | 0 | 0          | 0 | 0           | 0           | 0.015416924 |
| 0 | 0            | 0 | 0.17202823 | 0 | 0           | 0           | 0           |
| 0 | -0.084068927 | 0 | 0          | 0 | 0           | 0           | 0.01613148  |
| 0 | 0.37402875   | 0 | 0.1504781  | 0 | 0           | 0           | 0           |
| 0 | -0.24910217  | 0 | 0.48308643 | 0 | -0.33784348 | 0           | 0           |
| 0 | 0            | 0 | 0.4762697  | 0 | -0.34135182 | 0           | 0.045001354 |
| 0 | 0            | 0 | 0.49897648 | 0 | -0.25055352 | 0           | 0           |
| 0 | 0.37568639   | 0 | 0          | 0 | 0.13873664  | 0           | 0           |
| 0 | 0            | 0 | 0          | 0 | 0           | 0           | 0.017232752 |
| 0 | -0.24730874  | 0 | 0.15245726 | 0 | 0           | 0           | 0           |
| 0 | -0.24448999  | 0 | 0.15148196 | 0 | 0           | 0           | 0.008001502 |
| 0 | 0            | 0 | 0.49451676 | 0 | -0.27187794 | 0           | 0.099452725 |
| 0 | 0            | 0 | 0          | 0 | 0           | 0           | 0           |
| 0 | 0            | 0 | 0.14994248 | 0 | 0           | 0           | 0.019131518 |
| 0 | 0            | 0 | 0          | 0 | 0.24707175  | 0           | 0           |
| 0 | -0.25176966  | 0 | 0.17246772 | 0 | 0           | 0           | 0           |
| 0 | 0.37674525   | 0 | 0.46070552 | 0 | -0.32900478 | 0           | 0           |
| 0 | 0            | 0 | 0          | 0 | 0           | 0           | 0.016918198 |
| 0 | 0            | 0 | 0          | 0 | 0           | 0           | 0.041853537 |
| 0 | 0.38786156   | 0 | 0          | 0 | 0           | 0           | 0           |
| 0 | 0            | 0 | 0          | 0 | 0           | 0           | 0.02792264  |
| 0 | 0.38923477   | 0 | 0.1406274  | 0 | 0           | 0           | 0.043459793 |
| 0 | -0.23284063  | 0 | 0.47680306 | 0 | -0.34193415 | 0           | 0.046135278 |
| 0 | 0            | 0 | 0          | 0 | 0.13810023  | 0           | 0.006027833 |
| 0 | 0            | 0 | 0          | 0 | 0.13878254  | 0           | 0           |
| 0 | 0            | 0 | 0          | 0 | 0.23655005  | 0           | 0.066583221 |
| 0 | -0.24245377  | 0 | 0.14998924 | 0 | 0           | 0           | 0.019964111 |
| 0 | 0            | 0 | 0.4626109  | 0 | -0.33465727 | 0           | 0           |
| 0 | 0            | 0 | 0          | 0 | 0           | 0           | 0.048058501 |
| 0 | 0.37339661   | 0 | 0          | 0 | 0.13722515  | 0           | 0           |
| 0 | 0            | 0 | 0          | 0 | 0           | 0           | 0           |
| 0 | 0            | 0 | 0          | 0 | 0.15706968  | 0           | 0           |
| 0 | 0.46185454   | 0 | 0          | 0 | 0           | 0           | 0           |
| 0 | 0.46674822   | 0 | 0          | 0 | 0           | 0           | 0.004842825 |
| 0 | 0            | 0 | 0          | 0 | 0           | 0           | 0.006282981 |
| 0 | 0.46776726   | 0 | 0          | 0 | 0           | 0           | 0           |
| 0 | 0            | 0 | 0          | 0 | 0           | 0           | 0           |

|   |             |   |            |   |             |             |              |
|---|-------------|---|------------|---|-------------|-------------|--------------|
| 0 | 0           | 0 | 0.14386934 | 0 | 0           | 0.047431591 | 0            |
| 0 | 0.37703849  | 0 | 0.13478392 | 0 | 0           | 0           | 0            |
| 0 | -0.24800746 | 0 | 0          | 0 | 0.13877176  | 0           | 0            |
| 0 | -0.24532045 | 0 | 0          | 0 | 0.13786887  | 0           | 0.00773479   |
| 0 | 0           | 0 | 0          | 0 | 0.13657676  | 0           | 0.018632032  |
| 0 | -0.24629897 | 0 | 0.46276545 | 0 | -0.33497795 | 0           | 0            |
| 0 | -0.25212068 | 0 | 0          | 0 | 0.15751965  | 0           | 0            |
| 0 | 0           | 0 | 0          | 0 | 0           | 0           | 0            |
| 0 | 0.38575641  | 0 | 0          | 0 | 0           | 0           | 0            |
| 0 | -0.23227287 | 0 | 0          | 0 | 0           | 0           | 0.007786662  |
| 0 | 0.3880055   | 0 | 0          | 0 | 0.12792173  | 0           | 0.041775489  |
| 0 | -0.23454267 | 0 | 0          | 0 | 0           | 0           | 0            |
| 0 | 0           | 0 | 0          | 0 | 0           | 0           | -0.00029011  |
| 0 | 0           | 0 | 0          | 0 | 0           | 0           | 0.006307061  |
| 0 | -0.23221606 | 0 | 0.14399347 | 0 | 0           | 0           | 0.048744322  |
| 0 | 0.62655073  | 0 | 0          | 0 | 0           | 0           | 0            |
| 0 | 0           | 0 | 0          | 0 | 0           | 0           | 0.022059198  |
| 0 | -0.155989   | 0 | 0          | 0 | 0           | 0           | 0            |
| 0 | -0.24325608 | 0 | 0          | 0 | 0.13660307  | 0           | 0.019464971  |
| 0 | -0.15734801 | 0 | 0          | 0 | 0           | 0           | 0.00081267   |
| 0 | -0.15146197 | 0 | 0          | 0 | 0           | 0           | 0.006707051  |
| 0 | 0.40012549  | 0 | 0          | 0 | 0           | 0           | 0.04263981   |
| 0 | 0.39308279  | 0 | 0          | 0 | 0           | 0           | 0            |
| 0 | 0           | 0 | 0          | 0 | 0.13047196  | 0           | 0.044846792  |
| 0 | 0.051154118 | 0 | 0          | 0 | 0           | 0           | 0            |
| 0 | 0           | 0 | 0.52670678 | 0 | -0.31049759 | 0           | 0            |
| 0 | 0.39351891  | 0 | 0          | 0 | 0           | 0           | 0.002554181  |
| 0 | 0           | 0 | 0          | 0 | 0           | 0           | 0            |
| 0 | 0           | 0 | 0          | 0 | 0           | 0           | 0.029392662  |
| 0 | 0.37656922  | 0 | 0          | 0 | 0.12206771  | 0           | 0            |
| 0 | 0           | 0 | 0          | 0 | 0           | 0           | -0.006158999 |
| 0 | -0.22968287 | 0 | 0          | 0 | 0           | 0           | 0.022816761  |
| 0 | 0.37072989  | 0 | 0.22333352 | 0 | 0           | 0           | 0            |
| 0 | 0.39553708  | 0 | 0          | 0 | 0           | 0           | 0.014444511  |
| 0 | 0.04446527  | 0 | 0          | 0 | 0           | 0           | -0.00688136  |
| 0 | 0           | 0 | 0          | 0 | 0           | 0           | -0.0075312   |
| 0 | 0           | 0 | 0          | 0 | 0           | 0           | 0.003468302  |
| 0 | -0.23363428 | 0 | 0          | 0 | 0.13057687  | 0           | 0.046153516  |
| 0 | 0.37415636  | 0 | 0.4951273  | 0 | -0.32398068 | 0           | 0            |
| 0 | 0           | 0 | 0.51219066 | 0 | -0.31574874 | 0           | 0            |
| 0 | -0.25243386 | 0 | 0.52676111 | 0 | -0.31089257 | 0           | 0            |
| 0 | 0           | 0 | 0.22348309 | 0 | 0           | 0           | 0            |
| 0 | 0           | 0 | 0.22291349 | 0 | 0           | 0           | -0.000906397 |
| 0 | 0.37060206  | 0 | 0.2022336  | 0 | 0           | 0           | 0            |
| 0 | 0           | 0 | 0.5049863  | 0 | -0.32603711 | 0           | 0.025069492  |
| 0 | -0.22813449 | 0 | 0          | 0 | 0           | 0           | 0.004770649  |
| 0 | -0.25237435 | 0 | 0.51289169 | 0 | -0.31579603 | 0           | 0            |

|   |             |   |            |   |             |             |              |
|---|-------------|---|------------|---|-------------|-------------|--------------|
| 0 | 0.38142744  | 0 | 0.18473383 | 0 | 0           | 0.025307603 | 0            |
| 0 | 0           | 0 | 0.20387067 | 0 | 0           | 0.011393034 | 0            |
| 0 | -0.25266871 | 0 | 0.22348746 | 0 | 0           | 0           | 0            |
| 0 | -0.25213344 | 0 | 0.22253874 | 0 | 0           | 0.000781692 | 0            |
| 0 | -0.24183304 | 0 | 0.50568035 | 0 | -0.32642055 | 0.026277539 | 0            |
| 0 | 0.37044002  | 0 | 0          | 0 | 0.20713731  | 0           | 0            |
| 0 | -0.2486194  | 0 | 0.20459337 | 0 | 0           | 0.012253464 | 0            |
| 0 | 0.3759409   | 0 | 0.509973   | 0 | -0.34891019 | 0           | 0            |
| 0 | 0.37599237  | 0 | 0.51237279 | 0 | -0.35116174 | 0           | 0            |
| 0 | 0.37021427  | 0 | 0          | 0 | 0.1882458   | 0           | 0            |
| 0 | 0           | 0 | 0          | 0 | 0.2070169   | 0           | 0            |
| 0 | 0           | 0 | 0          | 0 | 0.20675011  | 0           | -0.001467292 |
| 0 | 0.36803666  | 0 | 0.52462164 | 0 | -0.35275148 | 0           | -0.024717887 |
| 0 | 0.37949843  | 0 | 0          | 0 | 0.1735675   | 0           | 0.021440701  |
| 0 | 0           | 0 | 0          | 0 | 0           | 0.019586731 | 0            |
| 0 | 0           | 0 | 0.50970007 | 0 | -0.34997772 | 0           | 0            |
| 0 | 0           | 0 | 0.51033017 | 0 | -0.3498569  | 0           | 0.000904439  |
| 0 | 0           | 0 | 0.51285339 | 0 | -0.35182865 | 0           | -0.00291845  |
| 0 | 0.13257449  | 0 | 0.1973602  | 0 | 0           | 0           | 0            |
| 0 | 0           | 0 | 0          | 0 | 0.18968943  | 0           | 0.009649728  |
| 0 | 0           | 0 | 0.19717579 | 0 | 0           | 0           | 0            |
| 0 | -0.25303679 | 0 | 0          | 0 | 0.20701511  | 0           | 0            |
| 0 | -0.25277014 | 0 | 0          | 0 | 0.20637238  | 0           | 0.000224311  |
| 0 | 0.37658334  | 0 | 0.1650827  | 0 | 0           | 0           | 0            |
| 0 | 0.37616232  | 0 | 0.1660859  | 0 | 0           | 0           | -0.000198731 |
| 0 | 0.37597574  | 0 | 0.16641292 | 0 | 0           | 0           | -0.003483622 |
| 0 | -0.24716195 | 0 | 0.50991432 | 0 | -0.35019031 | 0           | 0            |
| 0 | -0.24663987 | 0 | 0.5106539  | 0 | -0.35041008 | 0           | 0.002582949  |
| 0 | -0.24727733 | 0 | 0.51375434 | 0 | -0.3525474  | 0           | -0.002191146 |
| 0 | -0.24953354 | 0 | 0          | 0 | 0.19040458  | 0           | 0.010510953  |
| 0 | 0.57434277  | 0 | 0          | 0 | 0           | 0           | 0            |
| 0 | 0.36933945  | 0 | 0          | 0 | 0           | 0           | 0            |
| 0 | 0.37191661  | 0 | 0          | 0 | 0           | 0           | 0.009413003  |
| 0 | 0.36904765  | 0 | 0          | 0 | 0           | 0           | 0            |
| 0 | 0           | 0 | 0.45174056 | 0 | -0.26079882 | 0           | 0            |
| 0 | 0           | 0 | 0.16481425 | 0 | 0           | 0           | 0.000284108  |
| 0 | 0.13470359  | 0 | 0          | 0 | 0.18321334  | 0           | 0            |
| 0 | 0.3786537   | 0 | 0          | 0 | 0           | 0           | 0.025308526  |
| 0 | 0.37549275  | 0 | 0          | 0 | 0           | 0           | 0.022695252  |
| 0 | 0.3697733   | 0 | 0          | 0 | 0           | 0           | 0            |
| 0 | 0           | 0 | 0          | 0 | 0           | 0           | 0.010051614  |
| 0 | 0           | 0 | 0          | 0 | 0           | 0           | 0.009046487  |
| 0 | 0           | 0 | 0          | 0 | 0           | 0           | 0            |
| 0 | 0           | 0 | 0          | 0 | 0           | 0           | -0.031393806 |
| 0 | 0           | 0 | 0.19713325 | 0 | 0           | 0           | -0.017567644 |
| 0 | 0           | 0 | 0          | 0 | 0.18298452  | 0           | 0            |
| 0 | 0           | 0 | 0.19822224 | 0 | 0           | 0           | 0            |

|   |              |   |            |   |             |              |              |
|---|--------------|---|------------|---|-------------|--------------|--------------|
| 0 | 0            | 0 | 0.19761656 | 0 | 0           | 0            | 0            |
| 0 | -0.047531741 | 0 | 0          | 0 | 0           | -0.031276123 | 0            |
| 0 | -0.24633973  | 0 | 0.16477967 | 0 | 0           | 0.001757977  | 0            |
| 0 | 0.37590484   | 0 | 0          | 0 | 0.15141736  | 0            | 0            |
| 0 | 0.37532415   | 0 | 0          | 0 | 0.1525641   | 0            | -0.000571296 |
| 0 | 0.37507299   | 0 | 0          | 0 | 0.15286377  | 0            | -0.004438176 |
| 0 | 0            | 0 | 0          | 0 | 0           | 0.01924359   | 0            |
| 0 | 0.5223722    | 0 | 0          | 0 | 0           | 0            | 0            |
| 0 | -0.24978307  | 0 | 0          | 0 | 0           | 0.011480733  | 0            |
| 0 | -0.25032775  | 0 | 0          | 0 | 0           | 0.01067471   | 0            |
| 0 | -0.25331755  | 0 | 0          | 0 | 0           | 0            | 0            |
| 0 | 0.51950668   | 0 | 0          | 0 | 0           | -0.003057799 | 0            |
| 0 | 0            | 0 | 0.47639911 | 0 | -0.25582217 | 0            | 0            |
| 0 | 0            | 0 | 0.4791476  | 0 | -0.24348886 | 0            | -0.038000344 |
| 0 | 0            | 0 | 0          | 0 | 0.15115462  | 0            | 7.19E-05     |
| 0 | 0.51725612   | 0 | 0          | 0 | 0           | -0.011884278 | 0            |
| 0 | 0            | 0 | 0.4792112  | 0 | -0.25220809 | 0            | 0            |
| 0 | 0.064688173  | 0 | 0.23269426 | 0 | 0           | 0            | 0            |
| 0 | -0.24683682  | 0 | 0          | 0 | 0           | 0.020174889  | 0            |
| 0 | 0.62647744   | 0 | 0.25424314 | 0 | 0           | 0            | 0            |
| 0 | 0            | 0 | 0.2317851  | 0 | 0           | 0            | 0            |
| 0 | 0            | 0 | 0.22450283 | 0 | 0           | -0.030293376 | 0            |
| 0 | 0            | 0 | 0.22850261 | 0 | 0           | -0.032905855 | 0            |
| 0 | 0            | 0 | 0          | 0 | 0           | 0.000122436  | 0            |
| 0 | 0.050804165  | 0 | 0.23979475 | 0 | 0           | 0            | 0            |
| 0 | 0.03617825   | 0 | 0.2480213  | 0 | 0           | -0.040316833 | 0            |
| 0 | 0            | 0 | 0.22033453 | 0 | 0           | 0            | 0            |
| 0 | 0.027846743  | 0 | 0.49424611 | 0 | -0.24375174 | 0            | 0            |
| 0 | 0            | 0 | 0.24619548 | 0 | 0           | -0.039945446 | 0            |
| 0 | 0            | 0 | 0.49395033 | 0 | -0.24539733 | 0            | 0            |
| 0 | 0            | 0 | 0.23846366 | 0 | 0           | 0            | 0            |
| 0 | 0            | 0 | 0          | 0 | 0.18252743  | 0            | -0.018266507 |
| 0 | 0            | 0 | 0          | 0 | 0.18326185  | 0            | 0            |
| 0 | 0            | 0 | 0          | 0 | 0.18278442  | 0            | 0            |
| 0 | -0.09731364  | 0 | 0          | 0 | 0           | 0.001148613  | 0            |
| 0 | -0.24709066  | 0 | 0          | 0 | 0.15111043  | 0            | 0.00154138   |
| 0 | 0.06290355   | 0 | 0          | 0 | 0.21984429  | 0            | 0            |
| 0 | 0            | 0 | 0          | 0 | 0.21175586  | 0            | -0.031971378 |
| 0 | 0            | 0 | 0          | 0 | 0.21888546  | 0            | 0            |
| 0 | 0            | 0 | 0          | 0 | 0.21664052  | 0            | -0.035135605 |
| 0 | 0            | 0 | 0          | 0 | 0.20658111  | 0            | 0            |
| 0 | 0.62646412   | 0 | 0          | 0 | 0.24377516  | 0            | 0            |
| 0 | 0.04766459   | 0 | 0          | 0 | 0.22765363  | 0            | 0            |
| 0 | 0.031391661  | 0 | 0          | 0 | 0.23721511  | 0            | -0.043460291 |
| 0 | 0            | 0 | 0          | 0 | 0.22629361  | 0            | 0            |
| 0 | 0            | 0 | 0          | 0 | 0.23535544  | 0            | -0.043084846 |
| 0 | 0.47162526   | 0 | 0          | 0 | 0           | -0.071797445 | 0            |

|   |              |   |            |   |             |              |             |
|---|--------------|---|------------|---|-------------|--------------|-------------|
| 0 | 0            | 0 | 0.20351169 | 0 | 0           | 0.066461626  | 0           |
| 0 | 0.62638848   | 0 | 0          | 0 | 0           | 0            | 0           |
| 0 | 0            | 0 | 0.50329411 | 0 | -0.30529848 | 0            | 0           |
| 0 | 0            | 0 | 0.49950159 | 0 | -0.34575294 | 0            | 0.06746357  |
| 0 | 0.37194852   | 0 | 0          | 0 | 0           | 0.005615186  | 0           |
| 0 | 0.36997273   | 0 | 0          | 0 | 0           | 0            | 0           |
| 0 | 0.13337968   | 0 | 0          | 0 | 0           | 0            | 0           |
| 0 | 0.12957137   | 0 | 0          | 0 | 0           | -0.006956141 | 0           |
| 0 | 0.13092997   | 0 | 0          | 0 | 0           | 0            | 0           |
| 0 | 0.36947875   | 0 | 0          | 0 | 0           | -0.00102996  | 0           |
| 0 | 0.3685868    | 0 | 0          | 0 | 0           | 0.002202528  | 0           |
| 0 | 0            | 0 | 0          | 0 | 0           | 0            | 0           |
| 0 | 0            | 0 | 0          | 0 | 0           | -0.007469782 | 0           |
| 0 | 0            | 0 | 0          | 0 | 0           | 0            | 0           |
| 0 | 0            | 0 | 0.49393982 | 0 | -0.34293036 | 0            | 0.078310917 |
| 0 | 0            | 0 | 0.48883269 | 0 | -0.33537137 | 0            | 0.094635114 |
| 0 | 0            | 0 | 0          | 0 | 0           | 0.004842755  | 0           |
| 0 | 0            | 0 | 0          | 0 | 0           | 0.063381668  | 0           |
| 0 | 0            | 0 | 0.2059529  | 0 | 0           | 0            | 0           |
| 0 | 0            | 0 | 0.17779378 | 0 | 0           | 0.082666772  | 0           |
| 0 | 0            | 0 | 0          | 0 | 0.18628267  | 0            | 0.066186811 |
| 0 | 0            | 0 | 0.15821529 | 0 | 0           | 0.066876859  | 0           |
| 0 | -0.25169584  | 0 | 0          | 0 | 0           | 0.006269412  | 0           |
| 0 | 0            | 0 | 0.49021571 | 0 | -0.33452599 | 0            | 0           |
| 0 | 0            | 0 | 0          | 0 | 0           | -0.013908515 | 0           |
| 0 | 0            | 0 | 0          | 0 | 0           | -0.014932105 | 0           |
| 0 | 0            | 0 | 0          | 0 | 0           | 0            | 0           |
| 0 | 0            | 0 | 0.48540854 | 0 | -0.21505323 | 0            | 0           |
| 0 | 0            | 0 | 0.26701182 | 0 | 0           | 0            | 0           |
| 0 | -0.040750772 | 0 | 0.26832446 | 0 | 0           | 0            | 0           |
| 0 | 0.56321676   | 0 | 0.28061099 | 0 | 0           | 0            | 0           |
| 0 | 0            | 0 | 0.27661918 | 0 | 0           | 0            | 0           |
| 0 | 0            | 0 | 0.27408204 | 0 | 0           | 0.001743478  | 0           |
| 0 | 0            | 0 | 0          | 0 | 0.1620457   | 0            | 0.08156989  |
| 0 | 0            | 0 | 0.50091646 | 0 | -0.22574829 | 0            | 0           |
| 0 | 0            | 0 | 0.48108656 | 0 | -0.3144802  | 0            | 0           |
| 0 | 0            | 0 | 0          | 0 | 0.14406618  | 0            | 0.06691715  |
| 0 | 0            | 0 | 0          | 0 | 0.18878927  | 0            | 0           |
| 0 | -0.059799897 | 0 | 0.50043553 | 0 | -0.22365619 | 0            | 0           |
| 0 | 0            | 0 | 0.28187359 | 0 | 0           | 0            | 0           |
| 0 | 0.57057942   | 0 | 0.27516898 | 0 | 0           | 0            | 0           |
| 0 | 0            | 0 | 0.27969206 | 0 | 0           | -0.005719214 | 0           |
| 0 | -0.057359447 | 0 | 0.28342092 | 0 | 0           | 0            | 0           |
| 0 | 0            | 0 | 0.47382697 | 0 | -0.20615163 | 0            | 0           |
| 0 | 0            | 0 | 0.4982192  | 0 | -0.20841139 | 0            | 0           |
| 0 | -0.05733399  | 0 | 0.28124392 | 0 | 0           | -0.004747876 | 0           |
| 0 | 0            | 0 | 0.49742023 | 0 | -0.21000296 | 0            | 0.002032444 |



|   |              |   |            |   |             |              |              |
|---|--------------|---|------------|---|-------------|--------------|--------------|
| 0 | 0            | 0 | 0.2648794  | 0 | 0           | 0            | 0            |
| 0 | 0            | 0 | 0.48822019 | 0 | -0.21767113 | 0            | 0            |
| 0 | -0.037571889 | 0 | 0.26605664 | 0 | 0           | 0            | 0            |
| 0 | 0            | 0 | 0.27053588 | 0 | 0           | 0.015157525  | 0            |
| 0 | -0.053452355 | 0 | 0.48804233 | 0 | -0.2159366  | 0            | 0            |
| 0 | 0            | 0 | 0.29342236 | 0 | 0           | -0.001106725 | 0            |
| 0 | 0            | 0 | 0.27500699 | 0 | 0           | 0.006892058  | 0            |
| 0 | 0            | 0 | 0.48871602 | 0 | -0.20709162 | 0            | 0.012489102  |
| 0 | 0.626538     | 0 | 0.20972296 | 0 | 0           | 0            | 0            |
| 0 | -0.048470703 | 0 | 0.27652744 | 0 | 0           | 0.007409272  | 0            |
| 0 | 0.064771404  | 0 | 0.44740058 | 0 | -0.24221161 | 0            | 0            |
| 0 | 0            | 0 | 0          | 0 | 0.2542624   | 0            | 0            |
| 0 | 0            | 0 | 0.44775785 | 0 | -0.24396468 | 0            | 0            |
| 0 | -0.0421294   | 0 | 0          | 0 | 0.25561686  | 0            | 0            |
| 0 | 0.56117506   | 0 | 0          | 0 | 0.26848011  | 0            | 0            |
| 0 | 0            | 0 | 0          | 0 | 0.26418309  | 0            | 0            |
| 0 | 0            | 0 | 0          | 0 | 0.26178949  | 0            | 0.001175542  |
| 0 | 0.43429561   | 0 | 0.47678057 | 0 | -0.31535327 | 0            | 0            |
| 0 | 0            | 0 | 0.49304584 | 0 | -0.30822261 | 0            | 0            |
| 0 | 0            | 0 | 0.45218121 | 0 | -0.25385368 | 0            | 0            |
| 0 | 0            | 0 | 0.45231883 | 0 | -0.25419383 | 0            | 0            |
| 0 | 0            | 0 | 0.44822571 | 0 | -0.25401906 | 0            | -0.005135214 |
| 0 | 0.079473567  | 0 | 0.20443409 | 0 | 0           | 0            | 0            |
| 0 | 0.068667287  | 0 | 0.20974482 | 0 | 0           | -0.006966651 | 0            |
| 0 | 0.070416421  | 0 | 0.20928286 | 0 | 0           | 0            | 0            |
| 0 | 0.43931328   | 0 | 0.19147692 | 0 | 0           | 0            | 0            |
| 0 | 0            | 0 | 0.20427574 | 0 | 0           | 0            | 0            |
| 0 | 0            | 0 | 0.2083982  | 0 | 0           | -0.006844896 | 0            |
| 0 | 0            | 0 | 0.20865844 | 0 | 0           | 0            | 0            |
| 0 | 0            | 0 | 0.49051173 | 0 | -0.30864054 | 0            | 0            |
| 0 | 0.59747783   | 0 | 0.25154083 | 0 | 0           | 0.041215539  | 0            |
| 0 | 0            | 0 | 0.49415391 | 0 | -0.30813848 | 0            | 0            |
| 0 | 0.56819118   | 0 | 0          | 0 | 0.26372637  | 0            | 0            |
| 0 | 0.43130044   | 0 | 0.19342248 | 0 | 0           | 0            | 0            |
| 0 | -0.18341554  | 0 | 0.49334147 | 0 | -0.30830006 | 0            | 0            |
| 0 | 0            | 0 | 0          | 0 | 0.2695964   | 0            | 0            |
| 0 | 0.4315464    | 0 | 0.18763347 | 0 | 0           | 0            | 0            |
| 0 | 0            | 0 | 0          | 0 | 0.26758892  | 0            | -0.006518823 |
| 0 | 0            | 0 | 0.48262244 | 0 | -0.31663852 | 0            | 0.01494338   |
| 0 | 0            | 0 | 0          | 0 | 0.2526694   | 0            | 0            |
| 0 | 0            | 0 | 0.46068699 | 0 | -0.21689505 | 0            | 0.048190335  |
| 0 | 0            | 0 | 0.20373054 | 0 | 0           | -0.008885487 | 0            |
| 0 | -0.059298793 | 0 | 0          | 0 | 0.27119193  | 0            | 0            |
| 0 | 0            | 0 | 0.20404959 | 0 | 0           | -0.008800945 | 0            |
| 0 | 0            | 0 | 0.2048127  | 0 | 0           | 0            | 0            |
| 0 | 0            | 0 | 0.46799281 | 0 | -0.2219784  | 0            | 0.04243359   |
| 0 | 0.59273267   | 0 | 0.44633449 | 0 | -0.20867749 | 0            | 0            |

|   |              |   |            |            |             |              |              |
|---|--------------|---|------------|------------|-------------|--------------|--------------|
| 0 | -0.038923846 | 0 | 0          | 0.25389047 | 0           | 0            | 0            |
| 0 | 0            | 0 | 0.53135253 | 0          | -0.31399035 | 0            | 0.060542601  |
| 0 | -0.059555433 | 0 | 0          | 0.26917746 | 0           | -0.00555524  | 0            |
| 0 | -0.025761964 | 0 | 0.46816745 | 0          | -0.22015016 | 0            | 0.042525543  |
| 0 | -0.1911097   | 0 | 0.49094576 | 0          | -0.30864234 | 0            | 0            |
| 0 | -0.19096094  | 0 | 0.4940549  | 0          | -0.30841619 | 0            | 0            |
| 0 | 0            | 0 | 0.19824255 | 0          | 0           | 0            | 0            |
| 0 | 0            | 0 | 0          | 0.25866367 | 0           | 0.014116743  | 0            |
| 0 | 0.62653109   | 0 | 0          | 0.19815226 | 0           | 0            | 0            |
| 0 | 0.43847227   | 0 | 0.17177794 | 0          | 0           | 0.01521085   | 0            |
| 0 | 0            | 0 | 0.52339225 | 0          | -0.31956434 | 0            | 0.068617884  |
| 0 | 0            | 0 | 0.19600848 | 0          | 0           | 0            | 0            |
| 0 | 0.62731736   | 0 | 0.23695816 | 0          | 0           | 0            | 0            |
| 0 | 0            | 0 | 0.19123497 | 0          | 0           | 0.001895181  | 0            |
| 0 | 0            | 0 | 0.24398651 | 0          | 0           | 0.045791741  | 0            |
| 0 | -0.013760027 | 0 | 0.24544426 | 0          | 0           | 0.046221455  | 0            |
| 0 | -0.18393772  | 0 | 0.48312338 | 0          | -0.316845   | 0            | 0.015991038  |
| 0 | 0.59822423   | 0 | 0.23998195 | 0          | 0           | 0            | 0            |
| 0 | 0            | 0 | 0          | 0.28183174 | 0           | -0.001662815 | 0            |
| 0 | 0            | 0 | 0.19570678 | 0          | 0           | 0            | 0            |
| 0 | 0            | 0 | 0.18864025 | 0          | 0           | 0.002949308  | 0            |
| 0 | 0            | 0 | 0          | 0.26347876 | 0           | 0.00540881   | 0            |
| 0 | 0            | 0 | 0.1929722  | 0          | 0           | 0.000653547  | 0            |
| 0 | 0            | 0 | 0.46835963 | 0          | -0.23447431 | 0            | 0            |
| 0 | 0            | 0 | 0.46808058 | 0          | -0.23641456 | 0            | 0            |
| 0 | 0.003142493  | 0 | 0.46759146 | 0          | -0.23421517 | 0            | 0            |
| 0 | 0            | 0 | 0.46766364 | 0          | -0.23487465 | 0            | -0.000717268 |
| 0 | -0.18581379  | 0 | 0.19871576 | 0          | 0           | 0            | 0            |
| 0 | -0.051140527 | 0 | 0          | 0.26504654 | 0           | 0.005917785  | 0            |
| 0 | -0.18476718  | 0 | 0.19575049 | 0          | 0           | 0            | 0            |
| 0 | -0.18240028  | 0 | 0.19160818 | 0          | 0           | 0.002885104  | 0            |
| 0 | 0.081585159  | 0 | 0          | 0.19006528 | 0           | 0            | 0            |
| 0 | 0            | 0 | 0          | 0          | 0           | -0.03083296  | 0            |
| 0 | 0            | 0 | 0.44448805 | 0          | -0.20987181 | 0            | 0            |
| 0 | 0.06569162   | 0 | 0          | 0.19794373 | 0           | -0.009375635 | 0            |
| 0 | 0.069673661  | 0 | 0          | 0.19610788 | 0           | 0            | 0            |
| 0 | -0.02460531  | 0 | 0.44400209 | 0          | -0.20792074 | 0            | 0            |
| 0 | -0.19175564  | 0 | 0.19558057 | 0          | 0           | 0            | 0            |
| 0 | 0            | 0 | 0.22210462 | 0          | 0           | 0.060680135  | 0            |
| 0 | 0.6263953    | 0 | 0.23635151 | 0          | 0           | 0            | 0            |
| 0 | 0            | 0 | 0          | 0.18985329 | 0           | 0            | 0            |
| 0 | -0.19005703  | 0 | 0.18915079 | 0          | 0           | 0.003818671  | 0            |
| 0 | 0.032717625  | 0 | 0          | 0          | 0           | 0            | 0            |
| 0 | 0            | 0 | 0          | 0.19656325 | 0           | -0.009245848 | 0            |
| 0 | -0.19038814  | 0 | 0.19258443 | 0          | 0           | 0.002176758  | 0            |
| 0 | 0            | 0 | 0          | 0.19544104 | 0           | 0            | 0            |
| 0 | 0.43776761   | 0 | 0          | 0.17842947 | 0           | 0            | 0            |

|   |              |   |            |   |             |   |              |
|---|--------------|---|------------|---|-------------|---|--------------|
| 0 | 0            | 0 | 0          | 0 | 0           | 0 | 0            |
| 0 | 0.007270476  | 0 | 0.2391871  | 0 | 0           | 0 | 0            |
| 0 | 0            | 0 | 0.23807588 | 0 | 0           | 0 | -0.003683095 |
| 0 | 0            | 0 | 0.23756859 | 0 | 0           | 0 | 0            |
| 0 | 0.007109522  | 0 | 0.2380963  | 0 | 0           | 0 | -0.001549418 |
| 0 | 0            | 0 | 0.23645717 | 0 | 0           | 0 | -0.00244061  |
| 0 | 0            | 0 | 0.46200411 | 0 | -0.23038925 | 0 | 0.010247205  |
| 0 | 0            | 0 | 0.46018792 | 0 | -0.22848256 | 0 | 0            |
| 0 | 0.003264977  | 0 | 0.45975449 | 0 | -0.22651623 | 0 | 0            |
| 0 | 0.5933       | 0 | 0          | 0 | 0.24155761  | 0 | 0.03791781   |
| 0 | 0.43125307   | 0 | 0          | 0 | 0.17364032  | 0 | 0            |
| 0 | 0.43117403   | 0 | 0          | 0 | 0.17713628  | 0 | 0            |
| 0 | 0            | 0 | 0.52152151 | 0 | -0.3042306  | 0 | 0            |
| 0 | 0            | 0 | 0          | 0 | 0.19039838  | 0 | -0.010218778 |
| 0 | 0            | 0 | 0          | 0 | 0.18937227  | 0 | -0.009517071 |
| 0 | 0            | 0 | 0          | 0 | 0.18983871  | 0 | 0            |
| 0 | 0.43661323   | 0 | 0          | 0 | 0.16065788  | 0 | 0.011384991  |
| 0 | 0.62679644   | 0 | 0          | 0 | 0           | 0 | 0            |
| 0 | 3.1676924    | 0 | 0.4382927  | 0 | -0.21946786 | 0 | 0            |
| 0 | 0            | 0 | 0          | 0 | 0.18328778  | 0 | 0            |
| 0 | 0.009947813  | 0 | 0.23748491 | 0 | 0           | 0 | 0.009444505  |
| 0 | 0            | 0 | 0.23601441 | 0 | 0           | 0 | 0.008692188  |
| 0 | 0            | 0 | 0          | 0 | 0.17969039  | 0 | 0            |
| 0 | 0            | 0 | 0          | 0 | 0.17783581  | 0 | -0.000403179 |
| 0 | 0.62509996   | 0 | 0          | 0 | 0.22538488  | 0 | 0            |
| 0 | 0.59624883   | 0 | 0          | 0 | 0.22939585  | 0 | 0            |
| 0 | 0            | 0 | 0          | 0 | 0.23269824  | 0 | 0.043445576  |
| 0 | 0.41175049   | 0 | 0.51404855 | 0 | -0.27688414 | 0 | 0            |
| 0 | 0.62644663   | 0 | 0.22548246 | 0 | 0           | 0 | 0.034048287  |
| 0 | 0            | 0 | 0          | 0 | 0.17919444  | 0 | 0            |
| 0 | -0.016285753 | 0 | 0          | 0 | 0.23419052  | 0 | 0.043866211  |
| 0 | 0            | 0 | 0          | 0 | 0.17449223  | 0 | 0.001257691  |
| 0 | 0            | 0 | 0          | 0 | 0.17668934  | 0 | 0.000231598  |
| 0 | 0.00857775   | 0 | 0          | 0 | 0           | 0 | -0.039344943 |
| 0 | 0            | 0 | 0          | 0 | 0           | 0 | -0.039508583 |
| 0 | -0.18665555  | 0 | 0          | 0 | 0.18375661  | 0 | 0            |
| 0 | 0            | 0 | 0.51534246 | 0 | -0.3498992  | 0 | 0.062315248  |
| 0 | -0.1850893   | 0 | 0          | 0 | 0.17942373  | 0 | 0            |
| 0 | -0.18446489  | 0 | 0          | 0 | 0.17819623  | 0 | 0.000589111  |
| 0 | 0.014761112  | 0 | 0.45120942 | 0 | -0.22911794 | 0 | 0.036205165  |
| 0 | 0            | 0 | 0.45144857 | 0 | -0.23108062 | 0 | 0.035641106  |
| 0 | -0.19183165  | 0 | 0          | 0 | 0.17906047  | 0 | 0            |
| 0 | -0.19083278  | 0 | 0          | 0 | 0.17500048  | 0 | 0.002106266  |
| 0 | 0            | 0 | 0.51567057 | 0 | -0.27624719 | 0 | 0            |
| 0 | -0.19065751  | 0 | 0          | 0 | 0.17628366  | 0 | 0.001742339  |
| 0 | 0.41174552   | 0 | 0.2441791  | 0 | 0           | 0 | 0            |
| 0 | 0.62563933   | 0 | 0          | 0 | 0.22505879  | 0 | 0            |

|   |              |   |            |   |             |   |              |   |
|---|--------------|---|------------|---|-------------|---|--------------|---|
| 0 | 0            | 0 | 0.51226189 | 0 | -0.27988326 | 0 | 0            | 0 |
| 0 | 0.41126308   | 0 | 0.2380375  | 0 | 0           | 0 | 0            | 0 |
| 0 | 0            | 0 | 0.51440461 | 0 | -0.27785928 | 0 | 0.001054368  | 0 |
| 0 | 0.4124036    | 0 | 0.24162957 | 0 | 0           | 0 | 0.000295065  | 0 |
| 0 | 0            | 0 | 0          | 0 | 0.22648509  | 0 | -0.003889318 | 0 |
| 0 | 0.004645793  | 0 | 0          | 0 | 0.22704677  | 0 | 0            | 0 |
| 0 | 0            | 0 | 0          | 0 | 0.22537778  | 0 | 0            | 0 |
| 0 | 0            | 0 | 0          | 0 | 0.22438241  | 0 | -0.003045077 | 0 |
| 0 | 0.004298493  | 0 | 0          | 0 | 0.22606307  | 0 | -0.002160985 | 0 |
| 0 | 0            | 0 | 0          | 0 | 0.20494491  | 0 | 0.060435789  | 0 |
| 0 | -0.21146805  | 0 | 0.51589412 | 0 | -0.27613721 | 0 | 0            | 0 |
| 0 | -0.21197623  | 0 | 0.51245049 | 0 | -0.27980119 | 0 | 0            | 0 |
| 0 | 0            | 0 | 0.24014816 | 0 | 0           | 0 | 0            | 0 |
| 0 | -0.21001962  | 0 | 0.51472712 | 0 | -0.27809163 | 0 | 0.002620827  | 0 |
| 0 | 0            | 0 | 0.2440486  | 0 | 0           | 0 | -0.002680061 | 0 |
| 0 | 0            | 0 | 0.23742609 | 0 | 0           | 0 | 0.000688888  | 0 |
| 0 | 0.007142767  | 0 | 0          | 0 | 0.22570368  | 0 | 0.008489616  | 0 |
| 0 | 0            | 0 | 0          | 0 | 0.22418689  | 0 | 0.007749244  | 0 |
| 0 | 0.62642279   | 0 | 0          | 0 | 0.21431005  | 0 | 0.03199282   | 0 |
| 0 | 0            | 0 | 0          | 0 | 0           | 0 | -0.052570521 | 0 |
| 0 | -0.027211345 | 0 | 0          | 0 | 0           | 0 | -0.052742082 | 0 |
| 0 | -0.2120338   | 0 | 0.2406097  | 0 | 0           | 0 | 0            | 0 |
| 0 | 0.58926738   | 0 | 0          | 0 | 0           | 0 | 0            | 0 |
| 0 | -0.21134117  | 0 | 0.24434537 | 0 | 0           | 0 | -0.001367867 | 0 |
| 0 | -0.21058344  | 0 | 0.23765665 | 0 | 0           | 0 | 0.002241435  | 0 |
| 0 | 0.40486803   | 0 | 0.49531398 | 0 | -0.27149787 | 0 | 0            | 0 |
| 0 | 0            | 0 | 0          | 0 | 0           | 0 | 0.072570699  | 0 |
| 0 | 0            | 0 | 0.50060593 | 0 | -0.27586982 | 0 | 0.021270149  | 0 |
| 0 | 0.41071734   | 0 | 0          | 0 | 0.23105316  | 0 | 0            | 0 |
| 0 | 0            | 0 | 0.49847515 | 0 | -0.27070512 | 0 | 0            | 0 |
| 0 | 0.41253008   | 0 | 0.22916099 | 0 | 0           | 0 | 0.021175678  | 0 |
| 0 | 0.40973006   | 0 | 0          | 0 | 0.22410062  | 0 | 0            | 0 |
| 0 | 0.41104505   | 0 | 0          | 0 | 0.2286576   | 0 | -0.000354656 | 0 |
| 0 | 0.40675747   | 0 | 0.23282236 | 0 | 0           | 0 | 0            | 0 |
| 0 | -0.21051487  | 0 | 0.50123276 | 0 | -0.27596949 | 0 | 0.022010776  | 0 |
| 0 | -0.21669059  | 0 | 0.49896408 | 0 | -0.27067826 | 0 | 0            | 0 |
| 0 | 0            | 0 | 0.23248333 | 0 | 0           | 0 | 0.018870381  | 0 |
| 0 | 0            | 0 | 0          | 0 | 0.22610641  | 0 | 0            | 0 |
| 0 | 0            | 0 | 0          | 0 | 0.23094689  | 0 | -0.003176616 | 0 |
| 0 | 0            | 0 | 0          | 0 | 0.22350612  | 0 | 0.000223124  | 0 |
| 0 | -0.20971535  | 0 | 0.23298657 | 0 | 0           | 0 | 0.019625974  | 0 |
| 0 | -0.21342756  | 0 | 0          | 0 | 0.22656607  | 0 | 0            | 0 |
| 0 | -0.21262298  | 0 | 0          | 0 | 0.23123809  | 0 | -0.001864285 | 0 |
| 0 | -0.2121579   | 0 | 0          | 0 | 0.22372334  | 0 | 0.001772024  | 0 |
| 0 | 0.41125479   | 0 | 0          | 0 | 0.21695753  | 0 | 0.019814696  | 0 |
| 0 | 0.40554366   | 0 | 0          | 0 | 0.21952085  | 0 | 0            | 0 |
| 0 | 0.53067572   | 0 | 0          | 0 | 0           | 0 | -0.078728168 | 0 |

|   |              |   |            |   |             |   |              |   |
|---|--------------|---|------------|---|-------------|---|--------------|---|
| 0 | 0            | 0 | 0          | 0 | 0.2190704   | 0 | 0.017982252  | 0 |
| 0 | 0.626282     | 0 | 0.22845526 | 0 | 0           | 0 | 0            | 0 |
| 0 | 0.050034027  | 0 | 0.46959385 | 0 | -0.24690797 | 0 | 0            | 0 |
| 0 | 0.61884084   | 0 | 0.4875333  | 0 | -0.24189606 | 0 | 0            | 0 |
| 0 | -0.2112235   | 0 | 0          | 0 | 0.21956623  | 0 | 0.018735597  | 0 |
| 0 | 0.42376738   | 0 | 0.4705125  | 0 | -0.28845888 | 0 | 0.074129084  | 0 |
| 0 | 0            | 0 | 0.47117826 | 0 | -0.24872646 | 0 | 0            | 0 |
| 0 | 0.61815259   | 0 | 0.49325127 | 0 | -0.24677636 | 0 | 0            | 0 |
| 0 | 0            | 0 | 0.47456863 | 0 | -0.25247253 | 0 | -0.011690068 | 0 |
| 0 | 0            | 0 | 0.47620491 | 0 | -0.25561812 | 0 | 0            | 0 |
| 0 | 0            | 0 | 0.4820094  | 0 | -0.28154617 | 0 | 0.061872749  | 0 |
| 0 | 0.42534864   | 0 | 0.20611858 | 0 | 0           | 0 | 0.061003519  | 0 |
| 0 | 0.60646454   | 0 | 0.50282056 | 0 | -0.24527616 | 0 | -0.037306603 | 0 |
| 0 | 0.62090659   | 0 | 0.25058941 | 0 | 0           | 0 | -0.009150254 | 0 |
| 0 | 0.6233494    | 0 | 0.24966595 | 0 | 0           | 0 | 0            | 0 |
| 0 | 0.051379146  | 0 | 0.2282527  | 0 | 0           | 0 | -0.009764583 | 0 |
| 0 | 0.054847297  | 0 | 0.22663632 | 0 | 0           | 0 | 0            | 0 |
| 0 | 0.62658978   | 0 | 0.24627328 | 0 | 0           | 0 | 0            | 0 |
| 0 | 0            | 0 | 0.22806354 | 0 | 0           | 0 | -0.010453852 | 0 |
| 0 | 0.61884651   | 0 | 0.25165569 | 0 | 0           | 0 | -0.015178727 | 0 |
| 0 | 0            | 0 | 0.22655891 | 0 | 0           | 0 | 0            | 0 |
| 0 | -0.19736131  | 0 | 0.48252806 | 0 | -0.28167143 | 0 | 0.063002032  | 0 |
| 0 | 0            | 0 | 0.22671693 | 0 | 0           | 0 | -0.012563957 | 0 |
| 0 | 0.60038201   | 0 | 0.51239983 | 0 | -0.24954189 | 0 | 0            | 0 |
| 0 | 0            | 0 | 0.48677306 | 0 | -0.24201121 | 0 | -0.007940174 | 0 |
| 0 | 0            | 0 | 0.4862034  | 0 | -0.23948048 | 0 | -0.006522432 | 0 |
| 0 | -0.002787086 | 0 | 0.48642111 | 0 | -0.23997695 | 0 | -0.00706935  | 0 |
| 0 | 0            | 0 | 0.48899542 | 0 | -0.24837333 | 0 | -0.020010844 | 0 |
| 0 | 0            | 0 | 0.48779394 | 0 | -0.24361813 | 0 | 0            | 0 |
| 0 | -0.000934693 | 0 | 0.48730906 | 0 | -0.24141828 | 0 | 0            | 0 |
| 0 | 0.010578541  | 0 | 0.49356518 | 0 | -0.25089245 | 0 | 0            | 0 |
| 0 | 0            | 0 | 0.49419172 | 0 | -0.25267952 | 0 | 0            | 0 |
| 0 | 0            | 0 | 0.49123799 | 0 | -0.24501593 | 0 | -0.015013019 | 0 |
| 0 | 0.60756104   | 0 | 0.26213291 | 0 | 0           | 0 | -0.031650144 | 0 |
| 0 | -0.005093247 | 0 | 0.4909741  | 0 | -0.24295626 | 0 | -0.014248295 | 0 |
| 0 | 0            | 0 | 0.50690894 | 0 | -0.3027657  | 0 | 0.031692098  | 0 |
| 0 | 0.40508162   | 0 | 0.46047895 | 0 | -0.26781367 | 0 | 0            | 0 |
| 0 | 0            | 0 | 0.50126503 | 0 | -0.24520535 | 0 | -0.0303335   | 0 |
| 0 | 0            | 0 | 0.49190851 | 0 | -0.30247498 | 0 | 0            | 0 |
| 0 | -0.01574728  | 0 | 0.50147609 | 0 | -0.24339438 | 0 | -0.030690732 | 0 |
| 0 | 0.62649577   | 0 | 0          | 0 | 0.21412081  | 0 | 0            | 0 |
| 0 | 0            | 0 | 0.24933046 | 0 | 0           | 0 | -0.008949134 | 0 |
| 0 | 0.00137585   | 0 | 0.2509624  | 0 | 0           | 0 | -0.008054597 | 0 |
| 0 | 0.012335915  | 0 | 0.24707884 | 0 | 0           | 0 | -0.021055573 | 0 |
| 0 | 0            | 0 | 0.24595609 | 0 | 0           | 0 | -0.021306005 | 0 |
| 0 | 0            | 0 | 0.49780648 | 0 | -0.29974672 | 0 | 0            | 0 |
| 0 | 0.62639089   | 0 | 0          | 0 | 0           | 0 | 0            | 0 |

|   |              |            |   |             |   |              |   |
|---|--------------|------------|---|-------------|---|--------------|---|
| 0 | 0.43662384   | 0          | 0 | 0           | 0 | 0            | 0 |
| 0 | 0.43350063   | 0          | 0 | 0           | 0 | 0            | 0 |
| 0 | 0            | 0.19568918 | 0 | 0           | 0 | 0.038789972  | 0 |
| 0 | 0.43432473   | 0          | 0 | 0           | 0 | 0.003075022  | 0 |
| 0 | 0.42338504   | 0          | 0 | 0.1937943   | 0 | 0.058767993  | 0 |
| 0 | 0            | 0.49632833 | 0 | -0.31090308 | 0 | 0.044512801  | 0 |
| 0 | 0            | 0.49484759 | 0 | -0.31215233 | 0 | 0.046176475  | 0 |
| 0 | 0            | 0.2058481  | 0 | 0           | 0 | 0.033559701  | 0 |
| 0 | 0.057039221  | 0          | 0 | 0.21206837  | 0 | 0            | 0 |
| 0 | 0.053191148  | 0          | 0 | 0.21404908  | 0 | -0.010537817 | 0 |
| 0 | 0.07850937   | 0          | 0 | 0           | 0 | 0            | 0 |
| 0 | 0            | 0          | 0 | 0.21381503  | 0 | -0.0112166   | 0 |
| 0 | 0            | 0.19775768 | 0 | 0           | 0 | 0            | 0 |
| 0 | 0            | 0          | 0 | 0.21194256  | 0 | 0            | 0 |
| 0 | 0.61810585   | 0          | 0 | 0.23852852  | 0 | -0.009848655 | 0 |
| 0 | 0.076062954  | 0          | 0 | 0           | 0 | -0.000276793 | 0 |
| 0 | 0.62070433   | 0          | 0 | 0.23739493  | 0 | 0            | 0 |
| 0 | 0            | 0          | 0 | 0           | 0 | 0            | 0 |
| 0 | 0            | 0          | 0 | 0           | 0 | 0.001816709  | 0 |
| 0 | 0            | 0          | 0 | 0           | 0 | 0            | 0 |
| 0 | 0            | 0          | 0 | 0.21201302  | 0 | -0.013253998 | 0 |
| 0 | 0            | 0          | 0 | 0           | 0 | 0.003490716  | 0 |
| 0 | 0.62666258   | 0          | 0 | 0.23335646  | 0 | 0            | 0 |
| 0 | 0.43015382   | 0          | 0 | 0           | 0 | 0            | 0 |
| 0 | 0.42900714   | 0          | 0 | 0           | 0 | -0.009357412 | 0 |
| 0 | 0            | 0          | 0 | 0           | 0 | -0.000912164 | 0 |
| 0 | 0.61576838   | 0          | 0 | 0.23949725  | 0 | -0.016567944 | 0 |
| 0 | 0            | 0.48921798 | 0 | -0.30412383 | 0 | 0            | 0 |
| 0 | 0.62658545   | 0          | 0 | 0           | 0 | 0            | 0 |
| 0 | 0            | 0          | 0 | 0           | 0 | -0.003713113 | 0 |
| 0 | -0.18543213  | 0          | 0 | 0           | 0 | 0            | 0 |
| 0 | -0.1847494   | 0          | 0 | 0           | 0 | 0.00316987   | 0 |
| 0 | 0            | 0.19116288 | 0 | 0           | 0 | 0.044232582  | 0 |
| 0 | -0.18761112  | 0          | 0 | 0           | 0 | 0.004735037  | 0 |
| 0 | 0.60271952   | 0          | 0 | 0.25129666  | 0 | -0.034884705 | 0 |
| 0 | 0.41771077   | 0          | 0 | 0           | 0 | -0.020790574 | 0 |
| 0 | 0            | 0          | 0 | 0           | 0 | -0.008566054 | 0 |
| 0 | 0            | 0          | 0 | 0.23712184  | 0 | -0.009531555 | 0 |
| 0 | -0.001368619 | 0          | 0 | 0.23879176  | 0 | -0.008647459 | 0 |
| 0 | 0.010475304  | 0          | 0 | 0.23426469  | 0 | -0.02292358  | 0 |
| 0 | 0            | 0          | 0 | 0.23309649  | 0 | -0.02316213  | 0 |
| 0 | 0            | 0          | 0 | 0.17894833  | 0 | 0.038494554  | 0 |
| 0 | 0.033481145  | 0          | 0 | 0           | 0 | -0.011586546 | 0 |
| 0 | 0            | 0          | 0 | 0           | 0 | -0.011935245 | 0 |
| 0 | 0            | 0          | 0 | 0.19047288  | 0 | 0.03256987   | 0 |
| 0 | -0.19463961  | 0          | 0 | 0           | 0 | -0.007671148 | 0 |
| 0 | 0.61549731   | 0          | 0 | 0           | 0 | -0.028110039 | 0 |

|   |              |   |            |   |             |   |             |   |
|---|--------------|---|------------|---|-------------|---|-------------|---|
| 0 | 0            | 0 | 0          | 0 | 0.18096568  | 0 | 0           | 0 |
| 0 | 0            | 0 | 0          | 0 | 0.17409116  | 0 | 0.044072591 | 0 |
| 0 | 0            | 0 | 0.50674008 | 0 | -0.31135936 | 0 | 0           | 0 |
| 0 | 0.37207709   | 0 | 0.20273839 | 0 | 0           | 0 | 0           | 0 |
| 0 | 0            | 0 | 0.52218755 | 0 | -0.26934104 | 0 | 0.049989069 | 0 |
| 0 | 0            | 0 | 0.52149183 | 0 | -0.27046327 | 0 | 0.051209377 | 0 |
| 0 | -0.25128969  | 0 | 0.5068115  | 0 | -0.31175853 | 0 | 0           | 0 |
| 0 | 0            | 0 | 0.20469437 | 0 | 0           | 0 | 0           | 0 |
| 0 | 0            | 0 | 0.20224228 | 0 | 0           | 0 | 0.005699772 | 0 |
| 0 | 0.50012569   | 0 | 0          | 0 | 0           | 0 | 0           | 0 |
| 0 | 0            | 0 | 0.25750898 | 0 | 0           | 0 | 0.048780245 | 0 |
| 0 | 0            | 0 | 0.5160824  | 0 | -0.25987236 | 0 | 0           | 0 |
| 0 | 0.37610675   | 0 | 0.49152375 | 0 | -0.34433366 | 0 | 0           | 0 |
| 0 | -0.25211999  | 0 | 0.20468664 | 0 | 0           | 0 | 0           | 0 |
| 0 | -0.24900691  | 0 | 0.20189696 | 0 | 0           | 0 | 0.007424129 | 0 |
| 0 | 0.37161807   | 0 | 0          | 0 | 0.18619362  | 0 | 0           | 0 |
| 0 | 0            | 0 | 0          | 0 | 0           | 0 | 0           | 0 |
| 0 | 0            | 0 | 0          | 0 | 0           | 0 | 0.003791982 | 0 |
| 0 | 0.50570274   | 0 | 0          | 0 | 0           | 0 | 0           | 0 |
| 0 | 0            | 0 | 0.5112055  | 0 | -0.26614644 | 0 | 0.068636058 | 0 |
| 0 | 0.51949227   | 0 | 0          | 0 | 0           | 0 | 0.029746921 | 0 |
| 0 | 0            | 0 | 0.49280241 | 0 | -0.3462566  | 0 | 0.00773528  | 0 |
| 0 | 0            | 0 | 0.49212298 | 0 | -0.34481937 | 0 | 0           | 0 |
| 0 | 0.53112926   | 0 | 0          | 0 | 0           | 0 | 0           | 0 |
| 0 | -0.11848556  | 0 | 0          | 0 | 0           | 0 | 0           | 0 |
| 0 | -0.11785902  | 0 | 0          | 0 | 0           | 0 | 0.004888527 | 0 |
| 0 | 0.53139593   | 0 | 0          | 0 | 0           | 0 | 0.003990953 | 0 |
| 0 | 0            | 0 | 0          | 0 | 0.18793531  | 0 | 0           | 0 |
| 0 | 0.37374976   | 0 | 0.48194897 | 0 | -0.33653519 | 0 | 0           | 0 |
| 0 | 0            | 0 | 0          | 0 | 0.18567623  | 0 | 0.00529898  | 0 |
| 0 | 0            | 0 | 0.48514813 | 0 | -0.32007014 | 0 | 0           | 0 |
| 0 | 0            | 0 | 0          | 0 | 0           | 0 | 0.017033356 | 0 |
| 0 | 0.53638759   | 0 | 0          | 0 | 0           | 0 | 0.016454707 | 0 |
| 0 | 0.37831226   | 0 | 0.15219214 | 0 | 0           | 0 | 0.006682227 | 0 |
| 0 | 0.37621187   | 0 | 0.15269877 | 0 | 0           | 0 | 0           | 0 |
| 0 | -0.10993772  | 0 | 0          | 0 | 0           | 0 | 0.017658646 | 0 |
| 0 | -0.24431201  | 0 | 0.49312952 | 0 | -0.34680889 | 0 | 0.009445492 | 0 |
| 0 | -0.24754795  | 0 | 0.49233328 | 0 | -0.34503806 | 0 | 0           | 0 |
| 0 | 0            | 0 | 0.48632748 | 0 | -0.34156933 | 0 | 0.020954351 | 0 |
| 0 | 0            | 0 | 0          | 0 | 0           | 0 | 0.005153778 | 0 |
| 0 | 0.37115843   | 0 | 0.17159197 | 0 | 0           | 0 | 0           | 0 |
| 0 | -0.25175606  | 0 | 0.48567867 | 0 | -0.32014627 | 0 | 0           | 0 |
| 0 | -0.25250744  | 0 | 0          | 0 | 0.1879202   | 0 | 0           | 0 |
| 0 | -0.087223282 | 0 | 0          | 0 | 0           | 0 | 0.006171002 | 0 |
| 0 | -0.24959483  | 0 | 0          | 0 | 0.18530327  | 0 | 0.007018818 | 0 |
| 0 | 0.38954139   | 0 | 0.47610249 | 0 | -0.34062506 | 0 | 0.045309212 | 0 |
| 0 | 0            | 0 | 0          | 0 | 0.24336497  | 0 | 0.04874955  | 0 |

|   |             |   |            |   |             |   |              |   |
|---|-------------|---|------------|---|-------------|---|--------------|---|
| 0 | 0           | 0 | 0.17332196 | 0 | 0           | 0 | 0.025575227  | 0 |
| 0 | 0           | 0 | 0.15229595 | 0 | 0           | 0 | 0.005518769  | 0 |
| 0 | 0.38045028  | 0 | 0.15011939 | 0 | 0           | 0 | 0.020211377  | 0 |
| 0 | -0.24215965 | 0 | 0.48694046 | 0 | -0.34214761 | 0 | 0.021783331  | 0 |
| 0 | 0           | 0 | 0.47604038 | 0 | -0.33851458 | 0 | 0.047861326  | 0 |
| 0 | -0.24357071 | 0 | 0.17380688 | 0 | 0           | 0 | 0.026468387  | 0 |
| 0 | 0.37749281  | 0 | 0          | 0 | 0.13859319  | 0 | 0.006424687  | 0 |
| 0 | 0.37531827  | 0 | 0          | 0 | 0.13904476  | 0 | 0            | 0 |
| 0 | 0           | 0 | 0          | 0 | 0           | 0 | 0.018684714  | 0 |
| 0 | -0.24514754 | 0 | 0.15224849 | 0 | 0           | 0 | 0.00699045   | 0 |
| 0 | 0.37695246  | 0 | 0.46235445 | 0 | -0.33396734 | 0 | 0            | 0 |
| 0 | 0           | 0 | 0          | 0 | 0           | 0 | 0.043603309  | 0 |
| 0 | 0.38984524  | 0 | 0          | 0 | 0           | 0 | 0.006591684  | 0 |
| 0 | 0.3880786   | 0 | 0          | 0 | 0           | 0 | 0            | 0 |
| 0 | 0.37080456  | 0 | 0          | 0 | 0.15663161  | 0 | 0            | 0 |
| 0 | 0.39013061  | 0 | 0.14438167 | 0 | 0           | 0 | 0.047709294  | 0 |
| 0 | -0.23221255 | 0 | 0.47655802 | 0 | -0.3389168  | 0 | 0.049170865  | 0 |
| 0 | 0           | 0 | 0          | 0 | 0.13859972  | 0 | 0.005396959  | 0 |
| 0 | 0           | 0 | 0          | 0 | 0.15817231  | 0 | 0.024362707  | 0 |
| 0 | 0.37964962  | 0 | 0          | 0 | 0.13676016  | 0 | 0.019711967  | 0 |
| 0 | 0.46372648  | 0 | 0          | 0 | 0           | 0 | 0            | 0 |
| 0 | 0.46180036  | 0 | 0          | 0 | 0           | 0 | -0.000118559 | 0 |
| 0 | 0.46925126  | 0 | 0          | 0 | 0           | 0 | 0.007284428  | 0 |
| 0 | 0           | 0 | 0          | 0 | 0           | 0 | 0.006779026  | 0 |
| 0 | -0.24429804 | 0 | 0          | 0 | 0.15865491  | 0 | 0.025266847  | 0 |
| 0 | -0.24588591 | 0 | 0          | 0 | 0.13854172  | 0 | 0.006866652  | 0 |
| 0 | 0.39307796  | 0 | 0          | 0 | 0           | 0 | 0.023059097  | 0 |
| 0 | 0.62650254  | 0 | 0          | 0 | 0           | 0 | 0            | 0 |
| 0 | 0.38870834  | 0 | 0          | 0 | 0.13098305  | 0 | 0.045125913  | 0 |
| 0 | 0           | 0 | 0          | 0 | 0           | 0 | 0.001363067  | 0 |
| 0 | -0.2320693  | 0 | 0          | 0 | 0           | 0 | 0.008092011  | 0 |
| 0 | 0.37083457  | 0 | 0.52641561 | 0 | -0.30979623 | 0 | 0            | 0 |
| 0 | 0.62634646  | 0 | 0          | 0 | 0           | 0 | -0.007865211 | 0 |
| 0 | -0.15534524 | 0 | 0          | 0 | 0           | 0 | 0.002405934  | 0 |
| 0 | 0.39444609  | 0 | 0          | 0 | 0           | 0 | 0.004090511  | 0 |
| 0 | 0.050528819 | 0 | 0          | 0 | 0           | 0 | -0.002588335 | 0 |
| 0 | 0           | 0 | 0.52693144 | 0 | -0.31028437 | 0 | 0            | 0 |
| 0 | 0           | 0 | 0.52676166 | 0 | -0.31056098 | 0 | 0.000374363  | 0 |
| 0 | 0           | 0 | 0          | 0 | 0           | 0 | -0.003383881 | 0 |
| 0 | 0.37058898  | 0 | 0.51125322 | 0 | -0.3154361  | 0 | 0            | 0 |
| 0 | 0.37103829  | 0 | 0.22344256 | 0 | 0           | 0 | 0            | 0 |
| 0 | 0.37069653  | 0 | 0.22332062 | 0 | 0           | 0 | -0.0005009   | 0 |
| 0 | 0.38053087  | 0 | 0.50486737 | 0 | -0.3253296  | 0 | 0.025324703  | 0 |
| 0 | 0           | 0 | 0.51495714 | 0 | -0.31746054 | 0 | 0.012374782  | 0 |
| 0 | -0.25267691 | 0 | 0.52716078 | 0 | -0.31051385 | 0 | 0            | 0 |
| 0 | -0.25181181 | 0 | 0.5270598  | 0 | -0.31122826 | 0 | 0.002071925  | 0 |
| 0 | 0           | 0 | 0.22353265 | 0 | 0           | 0 | -0.001367104 | 0 |



|   |             |   |            |   |             |              |   |
|---|-------------|---|------------|---|-------------|--------------|---|
| 0 | 0.37437694  | 0 | 0.20330826 | 0 | 0           | 0.012384468  | 0 |
| 0 | -0.24832858 | 0 | 0.51584157 | 0 | -0.3176247  | 0.01323579   | 0 |
| 0 | -0.252644   | 0 | 0.22348453 | 0 | 0           | 8.41E-05     | 0 |
| 0 | 0.37008613  | 0 | 0          | 0 | 0.2071593   | -0.001064587 | 0 |
| 0 | 0.37049283  | 0 | 0          | 0 | 0.20698614  | 0            | 0 |
| 0 | 0.3763128   | 0 | 0.50926496 | 0 | -0.34928302 | 0            | 0 |
| 0 | 0.37633633  | 0 | 0.51015456 | 0 | -0.3491034  | 0.001283155  | 0 |
| 0 | 0.37627969  | 0 | 0.51212976 | 0 | -0.35096845 | -0.001489011 | 0 |
| 0 | 0.62649206  | 0 | 0.19773766 | 0 | 0           | 0            | 0 |
| 0 | 0.12901431  | 0 | 0.43262887 | 0 | -0.24080948 | 0            | 0 |
| 0 | 0.37345304  | 0 | 0          | 0 | 0.18911984  | 0.010650199  | 0 |
| 0 | 0           | 0 | 0          | 0 | 0.20708958  | -0.001715409 | 0 |
| 0 | 0           | 0 | 0.43410087 | 0 | -0.24249453 | 0            | 0 |
| 0 | 0           | 0 | 0.50995826 | 0 | -0.35029574 | 0.001870318  | 0 |
| 0 | 0.13305848  | 0 | 0.19829505 | 0 | 0           | 0            | 0 |
| 0 | 0.13046869  | 0 | 0.19748611 | 0 | 0           | -0.009148371 | 0 |
| 0 | 0.1320958   | 0 | 0.19796019 | 0 | 0           | 0            | 0 |
| 0 | 0           | 0 | 0.19731192 | 0 | 0           | -0.009699101 | 0 |
| 0 | 0           | 0 | 0.19810214 | 0 | 0           | 0            | 0 |
| 0 | 0           | 0 | 0.19796424 | 0 | 0           | 0            | 0 |
| 0 | -0.25311808 | 0 | 0          | 0 | 0.20702608  | -0.000265375 | 0 |
| 0 | 0.37590779  | 0 | 0.16506707 | 0 | 0           | 0.00097568   | 0 |
| 0 | 0.57284288  | 0 | 0          | 0 | 0           | -0.030671764 | 0 |
| 0 | -0.24614167 | 0 | 0.51036658 | 0 | -0.35074237 | 0.00334074   | 0 |
| 0 | 0.62647871  | 0 | 0          | 0 | 0.1835502   | 0            | 0 |
| 0 | 0.37266251  | 0 | 0          | 0 | 0           | 0.010718346  | 0 |
| 0 | 0.36936584  | 0 | 0          | 0 | 0           | 0            | 0 |
| 0 | 0.37181064  | 0 | 0          | 0 | 0           | 0.009395958  | 0 |
| 0 | 0           | 0 | 0.44874176 | 0 | -0.2574831  | -0.016151807 | 0 |
| 0 | 0           | 0 | 0.45235269 | 0 | -0.26012339 | 0            | 0 |
| 0 | 0           | 0 | 0.45249928 | 0 | -0.26080514 | 0            | 0 |
| 0 | 0.13246492  | 0 | 0          | 0 | 0.18340476  | -0.009779805 | 0 |
| 0 | 0.3759936   | 0 | 0          | 0 | 0           | 0.020187086  | 0 |
| 0 | 0.13514161  | 0 | 0          | 0 | 0.1840541   | 0            | 0 |
| 0 | 0.13442495  | 0 | 0          | 0 | 0.18357112  | 0            | 0 |
| 0 | 0           | 0 | 0          | 0 | 0           | 0.010052589  | 0 |
| 0 | 0           | 0 | 0.19883859 | 0 | 0           | -0.018778573 | 0 |
| 0 | 0           | 0 | 0.19799656 | 0 | 0           | -0.018062418 | 0 |
| 0 | 0           | 0 | 0          | 0 | 0.18318772  | -0.01032084  | 0 |
| 0 | 0           | 0 | 0          | 0 | 0.18381543  | 0            | 0 |
| 0 | 0           | 0 | 0          | 0 | 0.18353261  | 0            | 0 |
| 0 | 0           | 0 | 0.19885858 | 0 | 0           | 0            | 0 |
| 0 | 0.62669983  | 0 | 0.2309382  | 0 | 0           | 0            | 0 |
| 0 | 0.37599966  | 0 | 0          | 0 | 0.1514093   | 0.000788814  | 0 |
| 0 | 0.061485588 | 0 | 0.47281708 | 0 | -0.24577619 | 0            | 0 |
| 0 | 0.52250572  | 0 | 0          | 0 | 0           | 0.000638572  | 0 |
| 0 | 0.62647858  | 0 | 0.24656621 | 0 | 0           | -0.040203948 | 0 |

|   |             |   |            |   |             |   |              |   |
|---|-------------|---|------------|---|-------------|---|--------------|---|
| 0 | 0.6264756   | 0 | 0.49359491 | 0 | -0.24464322 | 0 | 0            | 0 |
| 0 | 0.62646304  | 0 | 0.23885745 | 0 | 0           | 0 | 0            | 0 |
| 0 | 0           | 0 | 0.47356229 | 0 | -0.24747233 | 0 | 0            | 0 |
| 0 | 0           | 0 | 0.46917233 | 0 | -0.25001749 | 0 | -0.029029148 | 0 |
| 0 | -0.24976267 | 0 | 0          | 0 | 0           | 0 | 0.011481036  | 0 |
| 0 | 0           | 0 | 0.47035932 | 0 | -0.24675085 | 0 | -0.031896191 | 0 |
| 0 | 0           | 0 | 0.47094719 | 0 | -0.25629113 | 0 | 0            | 0 |
| 0 | 0.062774128 | 0 | 0.23094368 | 0 | 0           | 0 | -0.028923216 | 0 |
| 0 | 0.047395216 | 0 | 0.47774737 | 0 | -0.2434014  | 0 | 0            | 0 |
| 0 | 0.072022567 | 0 | 0.22592704 | 0 | 0           | 0 | 0            | 0 |
| 0 | 0.032652379 | 0 | 0.47982358 | 0 | -0.23678339 | 0 | -0.039421658 | 0 |
| 0 | 0           | 0 | 0.47804914 | 0 | -0.24506607 | 0 | 0            | 0 |
| 0 | 0           | 0 | 0.47967824 | 0 | -0.2385051  | 0 | -0.039057919 | 0 |
| 0 | 0           | 0 | 0.23002597 | 0 | 0           | 0 | -0.029203403 | 0 |
| 0 | 0           | 0 | 0.22523801 | 0 | 0           | 0 | 0            | 0 |
| 0 | 0.051378219 | 0 | 0.23623534 | 0 | 0           | 0 | -0.033243366 | 0 |
| 0 | 0           | 0 | 0.23490942 | 0 | 0           | 0 | -0.033170126 | 0 |
| 0 | 0           | 0 | 0.21984324 | 0 | 0           | 0 | -0.02803417  | 0 |
| 0 | 0           | 0 | 0          | 0 | 0.18403124  | 0 | -0.019322819 | 0 |
| 0 | 0           | 0 | 0          | 0 | 0.18330102  | 0 | -0.018709045 | 0 |
| 0 | 0           | 0 | 0          | 0 | 0.18381626  | 0 | 0            | 0 |
| 0 | 0.62754139  | 0 | 0          | 0 | 0.21804604  | 0 | 0            | 0 |
| 0 | 0.62625693  | 0 | 0          | 0 | 0.2267117   | 0 | 0            | 0 |
| 0 | 0.62646322  | 0 | 0          | 0 | 0.23573826  | 0 | -0.043337364 | 0 |
| 0 | 0.060951655 | 0 | 0          | 0 | 0.21818443  | 0 | -0.030702285 | 0 |
| 0 | 0.071060494 | 0 | 0          | 0 | 0.21237019  | 0 | 0            | 0 |
| 0 | 0           | 0 | 0          | 0 | 0.21722478  | 0 | -0.030971377 | 0 |
| 0 | 0           | 0 | 0          | 0 | 0.21164275  | 0 | 0            | 0 |
| 0 | 0.04838489  | 0 | 0          | 0 | 0.22406666  | 0 | -0.035503429 | 0 |
| 0 | 0           | 0 | 0          | 0 | 0.20630615  | 0 | -0.029297303 | 0 |
| 0 | 0           | 0 | 0          | 0 | 0.22271142  | 0 | -0.035421959 | 0 |
| 0 | 0           | 0 | 0.51261096 | 0 | -0.31645706 | 0 | 0.067730044  | 0 |
| 0 | 0           | 0 | 0.20327429 | 0 | 0           | 0 | 0.066616969  | 0 |
| 0 | 0.62644646  | 0 | 0          | 0 | 0           | 0 | 0            | 0 |
| 0 | 0.62662473  | 0 | 0          | 0 | 0           | 0 | -0.007834873 | 0 |
| 0 | 0.62634107  | 0 | 0          | 0 | 0           | 0 | 0            | 0 |
| 0 | 0           | 0 | 0.49735697 | 0 | -0.32681003 | 0 | 0.083734222  | 0 |
| 0 | 0           | 0 | 0.49912887 | 0 | -0.34629862 | 0 | 0.068409087  | 0 |
| 0 | 0           | 0 | 0.50364239 | 0 | -0.30490794 | 0 | 0            | 0 |
| 0 | 0.37159566  | 0 | 0          | 0 | 0           | 0 | 0.005611862  | 0 |
| 0 | 0.13220835  | 0 | 0          | 0 | 0           | 0 | -0.004829244 | 0 |
| 0 | 0.13318892  | 0 | 0          | 0 | 0           | 0 | 0            | 0 |
| 0 | 0.1294116   | 0 | 0          | 0 | 0           | 0 | -0.00673347  | 0 |
| 0 | 0           | 0 | 0          | 0 | 0           | 0 | -0.005513906 | 0 |
| 0 | 0           | 0 | 0          | 0 | 0           | 0 | 0            | 0 |
| 0 | 0           | 0 | 0          | 0 | 0           | 0 | -0.007246086 | 0 |
| 0 | 0           | 0 | 0          | 0 | 0.18576601  | 0 | 0.066519429  | 0 |

|   |              |   |            |   |             |              |              |
|---|--------------|---|------------|---|-------------|--------------|--------------|
| 0 | 0.57849428   | 0 | 0.26793166 | 0 | 0           | 0            | 0            |
| 0 | 0            | 0 | 0.48967273 | 0 | -0.2272614  | 0            | 0            |
| 0 | -0.044409108 | 0 | 0.4889526  | 0 | -0.22518751 | 0            | 0            |
| 0 | 0            | 0 | 0          | 0 | 0           | -0.013679327 | 0            |
| 0 | 0.55954772   | 0 | 0.50047487 | 0 | -0.22422794 | 0            | 0            |
| 0 | 0            | 0 | 0.48658287 | 0 | -0.21384855 | 0            | 0            |
| 0 | 0            | 0 | 0.26940516 | 0 | 0           | 0            | 0            |
| 0 | 0            | 0 | 0.48590213 | 0 | -0.21577734 | 0            | 0.003081847  |
| 0 | -0.041884587 | 0 | 0.27068777 | 0 | 0           | 0            | 0            |
| 0 | 0            | 0 | 0.26711959 | 0 | 0           | 0            | -0.003319611 |
| 0 | 0.56235267   | 0 | 0.28245413 | 0 | 0           | 0            | 0            |
| 0 | 0.56178417   | 0 | 0.2807388  | 0 | 0           | 0            | -0.005686098 |
| 0 | -0.041362245 | 0 | 0.26840078 | 0 | 0           | 0            | -0.002324956 |
| 0 | 0            | 0 | 0.27665372 | 0 | 0           | 0            | -0.000387532 |
| 0 | 0            | 0 | 0.50217513 | 0 | -0.22473624 | 0            | 0            |
| 0 | 0.58273598   | 0 | 0.26512798 | 0 | 0           | 0            | 0            |
| 0 | 0            | 0 | 0.5002176  | 0 | -0.22493039 | 0            | -0.004710895 |
| 0 | 0.56716807   | 0 | 0.48699529 | 0 | -0.21621158 | 0            | 0            |
| 0 | -0.06096062  | 0 | 0.50173522 | 0 | -0.22270267 | 0            | 0            |
| 0 | -0.060727514 | 0 | 0.49987082 | 0 | -0.22299705 | 0            | -0.00374101  |
| 0 | 0            | 0 | 0.47746348 | 0 | -0.21707997 | 0            | 0            |
| 0 | -0.040996848 | 0 | 0.47695893 | 0 | -0.21535946 | 0            | 0            |
| 0 | 0            | 0 | 0.28217777 | 0 | 0           | 0            | -0.007980195 |
| 0 | 0.57221133   | 0 | 0.27521052 | 0 | 0           | 0            | 0.007872204  |
| 0 | 0            | 0 | 0.47732927 | 0 | -0.21078393 | 0            | 0.016607772  |
| 0 | -0.059184715 | 0 | 0.28369282 | 0 | 0           | 0            | -0.007063119 |
| 0 | 0.57711048   | 0 | 0          | 0 | 0.25520262  | 0            | 0            |
| 0 | 0            | 0 | 0.49825347 | 0 | -0.20846501 | 0            | 0.000222729  |
| 0 | 0.62652879   | 0 | 0.44739436 | 0 | -0.2431798  | 0            | 0            |
| 0 | 0            | 0 | 0.26457056 | 0 | 0           | 0            | 0.011447205  |
| 0 | -0.034526565 | 0 | 0.2657336  | 0 | 0           | 0            | 0.012101571  |
| 0 | 0            | 0 | 0.49004581 | 0 | -0.21949084 | 0            | 0.008090177  |
| 0 | -0.051648899 | 0 | 0.48998135 | 0 | -0.21786498 | 0            | 0.008599794  |
| 0 | 0.43894675   | 0 | 0.49284829 | 0 | -0.30747535 | 0            | 0            |
| 0 | 0.62651242   | 0 | 0.20481821 | 0 | 0           | 0            | 0            |
| 0 | 0.62652499   | 0 | 0.20879728 | 0 | 0           | 0            | -0.007117061 |
| 0 | 0.62652006   | 0 | 0.20803156 | 0 | 0           | 0            | 0            |
| 0 | 0            | 0 | 0          | 0 | 0.25655201  | 0            | 0            |
| 0 | 0.075821676  | 0 | 0.44072719 | 0 | -0.24180352 | 0            | 0            |
| 0 | 0.064970574  | 0 | 0.44555107 | 0 | -0.24111602 | 0            | -0.005898746 |
| 0 | 0.066998219  | 0 | 0.44598295 | 0 | -0.2423611  | 0            | 0            |
| 0 | 0            | 0 | 0          | 0 | 0.25440773  | 0            | -0.003976502 |
| 0 | -0.043182688 | 0 | 0          | 0 | 0.25787975  | 0            | 0            |
| 0 | 0.43141742   | 0 | 0.49391624 | 0 | -0.30743041 | 0            | 0            |
| 0 | 0.43162591   | 0 | 0.48951782 | 0 | -0.30837841 | 0            | 0            |
| 0 | 0            | 0 | 0.442367   | 0 | -0.24363393 | 0            | 0            |
| 0 | 0            | 0 | 0.44594871 | 0 | -0.24289467 | 0            | -0.005774467 |

|   |              |   |            |   |             |   |              |   |
|---|--------------|---|------------|---|-------------|---|--------------|---|
| 0 | 0            | 0 | 0.44700789 | 0 | -0.24405017 | 0 | 0            | 0 |
| 0 | -0.042907472 | 0 | 0          | 0 | 0.25572992  | 0 | -0.002990306 | 0 |
| 0 | 0.56039121   | 0 | 0          | 0 | 0.27019576  | 0 | 0            | 0 |
| 0 | 0.55952973   | 0 | 0          | 0 | 0.26864877  | 0 | -0.006471464 | 0 |
| 0 | 0            | 0 | 0          | 0 | 0.26426005  | 0 | -0.000843917 | 0 |
| 0 | 0.59411339   | 0 | 0.46764038 | 0 | -0.22049597 | 0 | 0.042316748  | 0 |
| 0 | 0.43833703   | 0 | 0.48247403 | 0 | -0.31590857 | 0 | 0.015129415  | 0 |
| 0 | 0.58135445   | 0 | 0          | 0 | 0.25295269  | 0 | 0            | 0 |
| 0 | 0            | 0 | 0.49725797 | 0 | -0.30572533 | 0 | 0            | 0 |
| 0 | 0            | 0 | 0.49597988 | 0 | -0.30693077 | 0 | 0            | 0 |
| 0 | 0            | 0 | 0.45044421 | 0 | -0.25227484 | 0 | -0.007471902 | 0 |
| 0 | 0            | 0 | 0.49367326 | 0 | -0.30847138 | 0 | 0.002490194  | 0 |
| 0 | 0            | 0 | 0.45095496 | 0 | -0.25264114 | 0 | -0.007329559 | 0 |
| 0 | 0            | 0 | 0.45273197 | 0 | -0.25374728 | 0 | 0            | 0 |
| 0 | 0.079059238  | 0 | 0.20492987 | 0 | 0           | 0 | 0            | 0 |
| 0 | 0.078662769  | 0 | 0.20450256 | 0 | 0           | 0 | -0.003451653 | 0 |
| 0 | 0.069727284  | 0 | 0.20905997 | 0 | 0           | 0 | -0.006476632 | 0 |
| 0 | 0.43702502   | 0 | 0.19781289 | 0 | 0           | 0 | 0            | 0 |
| 0 | 0.60575064   | 0 | 0.24488289 | 0 | 0           | 0 | 0.045779385  | 0 |
| 0 | 0.43741869   | 0 | 0.19646597 | 0 | 0           | 0 | 0            | 0 |
| 0 | 0            | 0 | 0.49542944 | 0 | -0.30679327 | 0 | 0            | 0 |
| 0 | 0.439774     | 0 | 0.19179057 | 0 | 0           | 0 | 0.002065479  | 0 |
| 0 | 0            | 0 | 0.20490876 | 0 | 0           | 0 | 0            | 0 |
| 0 | 0            | 0 | 0.20435969 | 0 | 0           | 0 | -0.004126181 | 0 |
| 0 | 0            | 0 | 0.20842239 | 0 | 0           | 0 | -0.006862434 | 0 |
| 0 | 0            | 0 | 0.49133371 | 0 | -0.30911627 | 0 | 0.003809818  | 0 |
| 0 | 0            | 0 | 0.49440041 | 0 | -0.30841662 | 0 | 0.001866126  | 0 |
| 0 | 0.62296755   | 0 | 0.46762656 | 0 | -0.23484883 | 0 | 0            | 0 |
| 0 | -0.18592895  | 0 | 0.49770715 | 0 | -0.30570189 | 0 | 0            | 0 |
| 0 | 0.43080363   | 0 | 0.19571602 | 0 | 0           | 0 | 0            | 0 |
| 0 | 0.56951585   | 0 | 0          | 0 | 0.26371417  | 0 | 0.006392428  | 0 |
| 0 | -0.18479923  | 0 | 0.49593708 | 0 | -0.30715302 | 0 | 0            | 0 |
| 0 | 0            | 0 | 0          | 0 | 0.26997001  | 0 | -0.008651054 | 0 |
| 0 | -0.18262591  | 0 | 0.49421119 | 0 | -0.30863895 | 0 | 0.003480816  | 0 |
| 0 | 0.43164999   | 0 | 0.19342879 | 0 | 0           | 0 | 0.000988426  | 0 |
| 0 | 0.43281668   | 0 | 0.18799868 | 0 | 0           | 0 | 0.003924711  | 0 |
| 0 | 0            | 0 | 0.46164947 | 0 | -0.22224768 | 0 | 0.046973008  | 0 |
| 0 | 3.1479547    | 0 | 0.23723177 | 0 | 0           | 0 | -0.002945441 | 0 |
| 0 | 0            | 0 | 0          | 0 | 0.25231417  | 0 | 0.010341324  | 0 |
| 0 | -0.017018634 | 0 | 0.46133512 | 0 | -0.22043964 | 0 | 0.047397292  | 0 |
| 0 | -0.061277606 | 0 | 0          | 0 | 0.27152802  | 0 | -0.00774262  | 0 |
| 0 | 0            | 0 | 0.20518529 | 0 | 0           | 0 | -0.009606872 | 0 |
| 0 | 0            | 0 | 0.53043545 | 0 | -0.31555253 | 0 | 0.062069184  | 0 |
| 0 | -0.036198015 | 0 | 0          | 0 | 0.25351678  | 0 | 0.010986979  | 0 |
| 0 | 0.59491493   | 0 | 0.44395746 | 0 | -0.20839695 | 0 | 0            | 0 |
| 0 | -0.19162558  | 0 | 0.4954545  | 0 | -0.30695141 | 0 | 0            | 0 |
| 0 | 0.62668707   | 0 | 0          | 0 | 0           | 0 | 0            | 0 |

|   |             |   |            |   |             |   |              |   |
|---|-------------|---|------------|---|-------------|---|--------------|---|
| 0 | -0.18970938 | 0 | 0.49194767 | 0 | -0.30922253 | 0 | 0.0046599    | 0 |
| 0 | 0.62650419  | 0 | 0          | 0 | 0.19040401  | 0 | 0            | 0 |
| 0 | -0.18992614 | 0 | 0.49450377 | 0 | -0.30892129 | 0 | 0.00338359   | 0 |
| 0 | 0.62651879  | 0 | 0          | 0 | 0.19697458  | 0 | -0.009524143 | 0 |
| 0 | 0.62653449  | 0 | 0          | 0 | 0.19482665  | 0 | 0            | 0 |
| 0 | 0           | 0 | 0.19812627 | 0 | 0           | 0 | -0.002989571 | 0 |
| 0 | 0           | 0 | 0.19830302 | 0 | 0           | 0 | 0            | 0 |
| 0 | 0           | 0 | 0.19603445 | 0 | 0           | 0 | -0.001285572 | 0 |
| 0 | 0.62728054  | 0 | 0.23779215 | 0 | 0           | 0 | 0            | 0 |
| 0 | 0           | 0 | 0.19575849 | 0 | 0           | 0 | -0.001541899 | 0 |
| 0 | 0.62361585  | 0 | 0.45913612 | 0 | -0.22683772 | 0 | 0            | 0 |
| 0 | 0           | 0 | 0.46866451 | 0 | -0.23584437 | 0 | 0            | 0 |
| 0 | 0.002918629 | 0 | 0.46818724 | 0 | -0.23369876 | 0 | 0            | 0 |
| 0 | 0           | 0 | 0.46805106 | 0 | -0.23396066 | 0 | -0.002038397 | 0 |
| 0 | 0           | 0 | 0.46789726 | 0 | -0.23618741 | 0 | -0.001289177 | 0 |
| 0 | 0.003039207 | 0 | 0.46753428 | 0 | -0.23414407 | 0 | -0.00040202  | 0 |
| 0 | -0.18638653 | 0 | 0.19863393 | 0 | 0           | 0 | -0.002122797 | 0 |
| 0 | -0.18563952 | 0 | 0.19825826 | 0 | 0           | 0 | 0            | 0 |
| 0 | -0.18472244 | 0 | 0.1957475  | 0 | 0           | 0 | 0.000152942  | 0 |
| 0 | 0.029910854 | 0 | 0          | 0 | 0           | 0 | -0.029895604 | 0 |
| 0 | 0           | 0 | 0          | 0 | 0           | 0 | -0.030254333 | 0 |
| 0 | 0.080640942 | 0 | 0          | 0 | 0.19016857  | 0 | -0.00407453  | 0 |
| 0 | 0.081373414 | 0 | 0          | 0 | 0.19033056  | 0 | 0            | 0 |
| 0 | 0.068853318 | 0 | 0          | 0 | 0.19589253  | 0 | -0.007901646 | 0 |
| 0 | -0.19182917 | 0 | 0.19558845 | 0 | 0           | 0 | -0.000236373 | 0 |
| 0 | 0.62624422  | 0 | 0.23602307 | 0 | 0           | 0 | 0.009447681  | 0 |
| 0 | 0           | 0 | 0          | 0 | 0.18997706  | 0 | -0.004739044 | 0 |
| 0 | 0           | 0 | 0          | 0 | 0.19025971  | 0 | 0            | 0 |
| 0 | 0.43617511  | 0 | 0          | 0 | 0.18285698  | 0 | 0            | 0 |
| 0 | 0           | 0 | 0          | 0 | 0.19521509  | 0 | -0.008281059 | 0 |
| 0 | 0.43710469  | 0 | 0          | 0 | 0.18014989  | 0 | 0            | 0 |
| 0 | 0.43771508  | 0 | 0          | 0 | 0.17839442  | 0 | -0.000231462 | 0 |
| 0 | 0.006493371 | 0 | 0.23931749 | 0 | 0           | 0 | -0.002981116 | 0 |
| 0 | 0.62704863  | 0 | 0          | 0 | 0           | 0 | -0.038925393 | 0 |
| 0 | 0           | 0 | 0.23773612 | 0 | 0           | 0 | -0.003874339 | 0 |
| 0 | 0.60322489  | 0 | 0          | 0 | 0.23362078  | 0 | 0.043430381  | 0 |
| 0 | 0.006061125 | 0 | 0.46180577 | 0 | -0.22899111 | 0 | 0.010832369  | 0 |
| 0 | 0           | 0 | 0.46210528 | 0 | -0.23080119 | 0 | 0.010094891  | 0 |
| 0 | 0.4307313   | 0 | 0          | 0 | 0.17920101  | 0 | 0            | 0 |
| 0 | 0.43192876  | 0 | 0          | 0 | 0.17383737  | 0 | 0.002245583  | 0 |
| 0 | 0.43132314  | 0 | 0          | 0 | 0.17712727  | 0 | 0.000487648  | 0 |
| 0 | 0           | 0 | 0          | 0 | 0.1903077   | 0 | -0.010173083 | 0 |
| 0 | 0.62641606  | 0 | 0.45101946 | 0 | -0.23023206 | 0 | 0.035450604  | 0 |
| 0 | 0           | 0 | 0          | 0 | 0.18177616  | 0 | 0            | 0 |
| 0 | 0           | 0 | 0          | 0 | 0.18314743  | 0 | -0.004152703 | 0 |
| 0 | 0           | 0 | 0          | 0 | 0.17973274  | 0 | -0.001663863 | 0 |
| 0 | 0.41119911  | 0 | 0.51528787 | 0 | -0.27564878 | 0 | 0            | 0 |

|   |             |   |            |            |             |              |              |
|---|-------------|---|------------|------------|-------------|--------------|--------------|
| 0 | 0.6250272   | 0 | 0          | 0.22610894 | 0           | 0            | 0            |
| 0 | 0.41043907  | 0 | 0.5120521  | 0          | -0.27907082 | 0            | 0            |
| 0 | 0.62390266  | 0 | 0          | 0.2254896  | 0           | -0.00306302  | 0            |
| 0 | 0.41215695  | 0 | 0.51423492 | 0          | -0.27708436 | 0            | 0.001347657  |
| 0 | 0           | 0 | 0          | 0.17926006 | 0           | -0.001769292 | 0            |
| 0 | -0.18587956 | 0 | 0          | 0.18172102 | 0           | 0            | 0            |
| 0 | -0.18754004 | 0 | 0          | 0.18364621 | 0           | -0.00328478  | 0            |
| 0 | -0.18516001 | 0 | 0          | 0.17942215 | 0           | -0.000231276 | 0            |
| 0 | 0           | 0 | 0.51358027 | 0          | -0.27854291 | 0            | 0            |
| 0 | -0.19197627 | 0 | 0          | 0.17907839 | 0           | -0.00046561  | 0            |
| 0 | 0.41058031  | 0 | 0.24039027 | 0          | 0           | 0            | 0            |
| 0 | 0           | 0 | 0.51547205 | 0          | -0.27600395 | 0            | -0.001537154 |
| 0 | 0.62642975  | 0 | 0          | 0.22422113 | 0           | 0.008496518  | 0            |
| 0 | 0.41110281  | 0 | 0.24423485 | 0          | 0           | -0.002080591 | 0            |
| 0 | 0           | 0 | 0.51250017 | 0          | -0.28017838 | 0            | 0.001855506  |
| 0 | 0.41145299  | 0 | 0.2380025  | 0          | 0           | 0.000979814  | 0            |
| 0 | 0.59235956  | 0 | 0          | 0          | 0           | -0.052837799 | 0            |
| 0 | 0           | 0 | 0          | 0.22558996 | 0           | -0.004373815 | 0            |
| 0 | 0.00373918  | 0 | 0          | 0.22721738 | 0           | -0.00349298  | 0            |
| 0 | -0.21273317 | 0 | 0.51386693 | 0          | -0.27836452 | 0            | 0            |
| 0 | -0.21153687 | 0 | 0.51586573 | 0          | -0.27610239 | 0            | -0.000224148 |
| 0 | -0.21096093 | 0 | 0.51288555 | 0          | -0.28033988 | 0            | 0.003403338  |
| 0 | 0           | 0 | 0.24023435 | 0          | 0           | -0.002005723 | 0            |
| 0 | -0.21224927 | 0 | 0.24063968 | 0          | 0           | -0.000706831 | 0            |
| 0 | 0.4123359   | 0 | 0.49997786 | 0          | -0.27540609 | 0            | 0.022319302  |
| 0 | 0.4060347   | 0 | 0.49779086 | 0          | -0.26997597 | 0            | 0            |
| 0 | 0           | 0 | 0.50204274 | 0          | -0.27468102 | 0            | 0.020228738  |
| 0 | 0.40918547  | 0 | 0          | 0.22634694 | 0           | 0            | 0            |
| 0 | 0.41306188  | 0 | 0.23249297 | 0          | 0           | 0.019844324  | 0            |
| 0 | 0.40982344  | 0 | 0          | 0.23112863 | 0           | -0.002575659 | 0            |
| 0 | 0.40988324  | 0 | 0          | 0.2240849  | 0           | 0.000515756  | 0            |
| 0 | -0.21002012 | 0 | 0.50265577 | 0          | -0.27479247 | 0            | 0.020982705  |
| 0 | 0           | 0 | 0          | 0.22621684 | 0           | -0.002331044 | 0            |
| 0 | -0.21374066 | 0 | 0          | 0.22661819 | 0           | -0.001033713 | 0            |
| 0 | 0.41155188  | 0 | 0          | 0.21908631 | 0           | 0.018957883  | 0            |
| 0 | 0.62647344  | 0 | 0.47089887 | 0          | -0.24790614 | 0            | 0            |
| 0 | 0.42495288  | 0 | 0.48182192 | 0          | -0.28076624 | 0            | 0.062144182  |
| 0 | 0.62651979  | 0 | 0.22653862 | 0          | 0           | 0            | 0            |
| 0 | 0.6264887   | 0 | 0.22861142 | 0          | 0           | -0.010829846 | 0            |
| 0 | 0.051351571 | 0 | 0.46855476 | 0          | -0.24743679 | 0            | 0            |
| 0 | 0.048110147 | 0 | 0.4681872  | 0          | -0.24533577 | 0            | -0.008545791 |
| 0 | 0.61681357  | 0 | 0.48630538 | 0          | -0.24042481 | 0            | -0.007962767 |
| 0 | 0.61892658  | 0 | 0.4870988  | 0          | -0.24218613 | 0            | 0            |
| 0 | 0.62666113  | 0 | 0.4925348  | 0          | -0.25191736 | 0            | 0            |
| 0 | 0           | 0 | 0.46966675 | 0          | -0.24703404 | 0            | -0.009233658 |
| 0 | 0           | 0 | 0.47025142 | 0          | -0.24924754 | 0            | 0            |
| 0 | 0.61484658  | 0 | 0.48996681 | 0          | -0.24320171 | 0            | -0.013579632 |

|   |              |   |            |   |             |   |              |   |
|---|--------------|---|------------|---|-------------|---|--------------|---|
| 0 | 0            | 0 | 0.47415286 | 0 | -0.25309322 | 0 | -0.011007026 | 0 |
| 0 | 0.60397857   | 0 | 0.50086801 | 0 | -0.24367632 | 0 | -0.030671926 | 0 |
| 0 | 0.62661581   | 0 | 0.2451154  | 0 | 0           | 0 | -0.020775998 | 0 |
| 0 | 0.62113754   | 0 | 0.25002191 | 0 | 0           | 0 | -0.008535397 | 0 |
| 0 | 0.052703715  | 0 | 0.22695103 | 0 | 0           | 0 | -0.008806585 | 0 |
| 0 | 0            | 0 | 0.22690158 | 0 | 0           | 0 | -0.009611206 | 0 |
| 0 | 0            | 0 | 0.49810409 | 0 | -0.30975071 | 0 | 0.040083621  | 0 |
| 0 | 0            | 0 | 0.48667812 | 0 | -0.2421566  | 0 | -0.007687381 | 0 |
| 0 | 0.009199869  | 0 | 0.4884942  | 0 | -0.24685119 | 0 | -0.019795002 | 0 |
| 0 | -0.002669794 | 0 | 0.48631923 | 0 | -0.24011992 | 0 | -0.006799692 | 0 |
| 0 | 0            | 0 | 0.48905727 | 0 | -0.24858087 | 0 | -0.020037603 | 0 |
| 0 | 0            | 0 | 0.50419988 | 0 | -0.30517432 | 0 | 0.034644328  | 0 |
| 0 | 0.62652284   | 0 | 0          | 0 | 0.21192552  | 0 | 0            | 0 |
| 0 | 0            | 0 | 0.49248917 | 0 | -0.30189407 | 0 | 0            | 0 |
| 0 | 0.6264831    | 0 | 0          | 0 | 0.21437319  | 0 | -0.011593311 | 0 |
| 0 | 0.62646521   | 0 | 0          | 0 | 0           | 0 | 0            | 0 |
| 0 | 0.62642696   | 0 | 0          | 0 | 0           | 0 | -0.001218532 | 0 |
| 0 | 0.4370274    | 0 | 0          | 0 | 0           | 0 | 0            | 0 |
| 0 | 0.4373897    | 0 | 0          | 0 | 0           | 0 | 0.002014073  | 0 |
| 0 | 0.43475287   | 0 | 0          | 0 | 0           | 0 | 0.00405374   | 0 |
| 0 | 0            | 0 | 0.1963447  | 0 | 0           | 0 | 0.038331944  | 0 |
| 0 | 0            | 0 | 0.49524759 | 0 | -0.3115248  | 0 | 0.045472285  | 0 |
| 0 | 0.054767196  | 0 | 0          | 0 | 0.21246151  | 0 | -0.009380603 | 0 |
| 0 | 0.079004624  | 0 | 0          | 0 | 0           | 0 | 0.002002486  | 0 |
| 0 | 0            | 0 | 0          | 0 | 0.21236906  | 0 | -0.010178167 | 0 |
| 0 | 0.62663351   | 0 | 0          | 0 | 0.23225838  | 0 | -0.022618935 | 0 |
| 0 | 0.61836996   | 0 | 0          | 0 | 0.23782397  | 0 | -0.009121883 | 0 |
| 0 | 0            | 0 | 0          | 0 | 0           | 0 | 0.002710942  | 0 |
| 0 | 0            | 0 | 0          | 0 | 0           | 0 | 0.001229536  | 0 |
| 0 | 0.42811046   | 0 | 0          | 0 | 0           | 0 | -0.007664494 | 0 |
| 0 | 0.62656801   | 0 | 0          | 0 | 0           | 0 | -0.011433472 | 0 |
| 0 | -0.18428696  | 0 | 0          | 0 | 0           | 0 | 0.003806011  | 0 |
| 0 | 0            | 0 | 0          | 0 | 0.17937183  | 0 | 0.038188193  | 0 |
| 0 | 0.37200982   | 0 | 0.50642889 | 0 | -0.31070585 | 0 | 0            | 0 |
| 0 | 0            | 0 | 0.5077828  | 0 | -0.31017693 | 0 | 0            | 0 |
| 0 | 0            | 0 | 0.50765856 | 0 | -0.3124499  | 0 | 0.006997505  | 0 |
| 0 | 0.37149983   | 0 | 0.20467528 | 0 | 0           | 0 | 0            | 0 |
| 0 | 0.37388308   | 0 | 0.20261685 | 0 | 0           | 0 | 0.006133673  | 0 |
| 0 | 0            | 0 | 0.52201787 | 0 | -0.26956692 | 0 | 0.050092034  | 0 |
| 0 | -0.25209662  | 0 | 0.50800056 | 0 | -0.31040842 | 0 | 0            | 0 |
| 0 | -0.24863287  | 0 | 0.50796418 | 0 | -0.31311907 | 0 | 0.008719173  | 0 |
| 0 | 0            | 0 | 0.20454032 | 0 | 0           | 0 | 0.003882046  | 0 |
| 0 | 0.50101208   | 0 | 0          | 0 | 0           | 0 | 0            | 0 |
| 0 | 0.50118354   | 0 | 0          | 0 | 0           | 0 | 0.003921157  | 0 |
| 0 | 0.37849786   | 0 | 0.49259102 | 0 | -0.34557299 | 0 | 0.00813025   | 0 |
| 0 | 0.37598349   | 0 | 0.49171015 | 0 | -0.34421391 | 0 | 0            | 0 |
| 0 | -0.25046152  | 0 | 0.20447765 | 0 | 0           | 0 | 0.005337763  | 0 |

|   |             |   |            |            |             |              |              |
|---|-------------|---|------------|------------|-------------|--------------|--------------|
| 0 | 0.371106    | 0 | 0          | 0.18791789 | 0           | 0            | 0            |
| 0 | 0.37323012  | 0 | 0          | 0.18605035 | 0           | 0.005765514  | 0            |
| 0 | 0.51028468  | 0 | 0          | 0          | 0           | 0.017996063  | 0            |
| 0 | 0           | 0 | 0          | 0          | 0           | 0.004742073  | 0            |
| 0 | 0.37117679  | 0 | 0.48442294 | 0          | -0.31977517 | 0            | 0            |
| 0 | 0           | 0 | 0.49301037 | 0          | -0.34593299 | 0            | 0.007058213  |
| 0 | 0.53270978  | 0 | 0          | 0          | 0           | 0.005674671  | 0            |
| 0 | -0.11686529 | 0 | 0          | 0          | 0           | 0.0057916    | 0            |
| 0 | 0           | 0 | 0.4901162  | 0          | -0.32376722 | 0            | 0.026665079  |
| 0 | 0.3807505   | 0 | 0.48584705 | 0          | -0.34089011 | 0            | 0.022028819  |
| 0 | 0           | 0 | 0          | 0          | 0.18776984  | 0            | 0.003670713  |
| 0 | 0.37803831  | 0 | 0.1525161  | 0          | 0           | 0.006278591  | 0            |
| 0 | 0.37934545  | 0 | 0.17290989 | 0          | 0           | 0.026433362  | 0            |
| 0 | -0.24490732 | 0 | 0.49340359 | 0          | -0.34637981 | 0            | 0.008528636  |
| 0 | -0.24320624 | 0 | 0.49082676 | 0          | -0.32399235 | 0            | 0.027568618  |
| 0 | -0.25091455 | 0 | 0          | 0          | 0.18768891  | 0            | 0.005123852  |
| 0 | 0.39013421  | 0 | 0.47587023 | 0          | -0.33781155 | 0            | 0.048140132  |
| 0 | 0.37734423  | 0 | 0          | 0          | 0.13881853  | 0            | 0.006143339  |
| 0 | 0.37861012  | 0 | 0          | 0          | 0.15776134  | 0            | 0.02523686   |
| 0 | 0.39033938  | 0 | 0          | 0          | 0           | 0.007400923  | 0            |
| 0 | 0.46422812  | 0 | 0          | 0          | 0           | 0.001875266  | 0            |
| 0 | 0.62652163  | 0 | 0          | 0          | 0           | -0.003312777 | 0            |
| 0 | 0.37089328  | 0 | 0.52640116 | 0          | -0.30981174 | 0            | 0            |
| 0 | 0.3710301   | 0 | 0.52651962 | 0          | -0.30991274 | 0            | 0.000779644  |
| 0 | 0           | 0 | 0.5269375  | 0          | -0.31029222 | 0            | 5.24E-05     |
| 0 | 0.37466343  | 0 | 0.5142278  | 0          | -0.31727901 | 0            | 0.013372703  |
| 0 | 0.37060597  | 0 | 0.22348266 | 0          | 0           | -0.000602155 | 0            |
| 0 | -0.25221499 | 0 | 0.52735769 | 0          | -0.3107708  | 0            | 0.001502951  |
| 0 | 0.62648109  | 0 | 0.43393964 | 0          | -0.24177499 | 0            | 0            |
| 0 | 0.37015603  | 0 | 0          | 0          | 0.20703381  | 0            | -0.000944402 |
| 0 | 0.37705087  | 0 | 0.50960401 | 0          | -0.34970692 | 0            | 0.002597348  |
| 0 | 0.62648508  | 0 | 0.19788079 | 0          | 0           | -0.010058694 | 0            |
| 0 | 0.62644683  | 0 | 0.19864582 | 0          | 0           | 0            | 0            |
| 0 | 0.12949463  | 0 | 0.43351898 | 0          | -0.24076936 | 0            | 0            |
| 0 | 0.62644818  | 0 | 0.19800468 | 0          | 0           | 0            | 0            |
| 0 | 0.12718638  | 0 | 0.43139266 | 0          | -0.23943283 | 0            | -0.007994831 |
| 0 | 0.12860634  | 0 | 0.43297268 | 0          | -0.24062831 | 0            | 0            |
| 0 | 0           | 0 | 0.43499579 | 0          | -0.24247021 | 0            | 0            |
| 0 | 0           | 0 | 0.43278799 | 0          | -0.24102926 | 0            | -0.008544055 |
| 0 | 0           | 0 | 0.43451866 | 0          | -0.24221926 | 0            | 0            |
| 0 | 0.13085219  | 0 | 0.19848286 | 0          | 0           | -0.009706408 | 0            |
| 0 | 0.12969927  | 0 | 0.19827976 | 0          | 0           | -0.009763443 | 0            |
| 0 | 0.13264213  | 0 | 0.1987826  | 0          | 0           | 0            | 0            |
| 0 | 0           | 0 | 0.19830277 | 0          | 0           | -0.010252011 | 0            |
| 0 | 0           | 0 | 0.19830732 | 0          | 0           | -0.01046141  | 0            |
| 0 | 0           | 0 | 0.19877304 | 0          | 0           | 0            | 0            |
| 0 | 0.62647574  | 0 | 0          | 0          | 0.18376379  | 0            | -0.010681301 |



|   |              |   |            |            |             |              |              |
|---|--------------|---|------------|------------|-------------|--------------|--------------|
| 0 | 0.62643679   | 0 | 0          | 0.18436444 | 0           | 0            | 0            |
| 0 | 0.62644252   | 0 | 0          | 0.18357484 | 0           | 0            | 0            |
| 0 | 0.3726929    | 0 | 0          | 0          | 0           | 0.010720259  | 0            |
| 0 | 0            | 0 | 0.44935508 | 0          | -0.2564968  | 0            | -0.017278638 |
| 0 | 0            | 0 | 0.44952503 | 0          | -0.25741297 | 0            | -0.016638162 |
| 0 | 0            | 0 | 0.45309065 | 0          | -0.26025009 | 0            | 0            |
| 0 | 0.62668461   | 0 | 0.47200847 | 0          | -0.24677501 | 0            | 0            |
| 0 | 0.13281732   | 0 | 0          | 0.18431374 | 0           | -0.010286342 | 0            |
| 0 | 0.13193156   | 0 | 0          | 0.18396762 | 0           | -0.010212336 | 0            |
| 0 | 0.13492168   | 0 | 0          | 0.18431742 | 0           | 0            | 0            |
| 0 | 0.62665898   | 0 | 0.22922548 | 0          | 0           | -0.028668506 | 0            |
| 0 | 0.62644739   | 0 | 0.47768762 | 0          | -0.24431308 | 0            | 0            |
| 0 | 0.62653475   | 0 | 0.47923074 | 0          | -0.23767255 | 0            | -0.039264804 |
| 0 | 0.62664105   | 0 | 0.22463067 | 0          | 0           | 0            | 0            |
| 0 | 0            | 0 | 0.19957915 | 0          | 0           | -0.019193786 | 0            |
| 0 | 0            | 0 | 0          | 0.18409053 | 0           | -0.010822812 | 0            |
| 0 | 0            | 0 | 0          | 0.18395584 | 0           | -0.010903862 | 0            |
| 0 | 0            | 0 | 0          | 0.18426407 | 0           | 0            | 0            |
| 0 | 0.62646686   | 0 | 0.23528684 | 0          | 0           | -0.033412231 | 0            |
| 0 | 0.059684083  | 0 | 0.46594071 | 0          | -0.24047428 | 0            | -0.027750743 |
| 0 | 0.068803801  | 0 | 0.46533066 | 0          | -0.24510913 | 0            | 0            |
| 0 | 0            | 0 | 0.46661885 | 0          | -0.24211015 | 0            | -0.028022684 |
| 0 | 0            | 0 | 0.46629619 | 0          | -0.24680108 | 0            | 0            |
| 0 | 0.04799585   | 0 | 0.46874302 | 0          | -0.23774449 | 0            | -0.032232338 |
| 0 | 0            | 0 | 0.46518047 | 0          | -0.2508789  | 0            | -0.026689144 |
| 0 | 0            | 0 | 0.46906527 | 0          | -0.23942519 | 0            | -0.032155391 |
| 0 | 0.069355896  | 0 | 0.22525089 | 0          | 0           | -0.0256804   | 0            |
| 0 | 0            | 0 | 0.22455565 | 0          | 0           | -0.026072737 | 0            |
| 0 | 0            | 0 | 0          | 0.18469224 | 0           | -0.019691702 | 0            |
| 0 | 0.62666895   | 0 | 0          | 0.21643052 | 0           | -0.030432943 | 0            |
| 0 | 0.62664716   | 0 | 0          | 0.21104397 | 0           | 0            | 0            |
| 0 | 0.62645618   | 0 | 0          | 0.22309864 | 0           | -0.035665147 | 0            |
| 0 | 0.068320617  | 0 | 0          | 0.21183788 | 0           | -0.027044953 | 0            |
| 0 | 0            | 0 | 0          | 0.21110477 | 0           | -0.027430691 | 0            |
| 0 | 0            | 0 | 0.51245833 | 0          | -0.31671653 | 0            | 0.067996952  |
| 0 | 0.62643955   | 0 | 0          | 0          | 0           | -0.005448288 | 0            |
| 0 | 0.62640756   | 0 | 0          | 0          | 0           | 0            | 0            |
| 0 | 0.62634346   | 0 | 0          | 0          | 0           | -0.007551535 | 0            |
| 0 | 0.13206309   | 0 | 0          | 0          | 0           | -0.00469445  | 0            |
| 0 | 0            | 0 | 0          | 0          | 0           | -0.005373499 | 0            |
| 0 | 0.57481672   | 0 | 0.4891191  | 0          | -0.22575867 | 0            | 0            |
| 0 | 0.57771762   | 0 | 0.26988694 | 0          | 0           | 0            | 0            |
| 0 | 0.57762406   | 0 | 0.26803945 | 0          | 0           | -0.003279953 | 0            |
| 0 | 0            | 0 | 0.49094319 | 0          | -0.22616822 | 0            | 0            |
| 0 | -0.045501194 | 0 | 0.49027732 | 0          | -0.2241753  | 0            | 0            |
| 0 | 0            | 0 | 0.48942523 | 0          | -0.22694977 | 0            | -0.002229181 |
| 0 | 0.55872431   | 0 | 0.50150404 | 0          | -0.22345634 | 0            | 0            |

|   |              |   |            |   |             |   |              |   |
|---|--------------|---|------------|---|-------------|---|--------------|---|
| 0 | -0.044741059 | 0 | 0.48877702 | 0 | -0.22496569 | 0 | -0.001273841 | 0 |
| 0 | 0.55837948   | 0 | 0.49977862 | 0 | -0.22341125 | 0 | -0.004677834 | 0 |
| 0 | 0            | 0 | 0.48673714 | 0 | -0.21409388 | 0 | 0.001009287  | 0 |
| 0 | 0            | 0 | 0.26967745 | 0 | 0           | 0 | -0.005752684 | 0 |
| 0 | -0.043184388 | 0 | 0.27091651 | 0 | 0           | 0 | -0.004806606 | 0 |
| 0 | 0.57930813   | 0 | 0.47634607 | 0 | -0.21567613 | 0 | 0            | 0 |
| 0 | 0.56039362   | 0 | 0.28274472 | 0 | 0           | 0 | -0.007552588 | 0 |
| 0 | 0            | 0 | 0.501216   | 0 | -0.22348966 | 0 | -0.006909381 | 0 |
| 0 | 0.58584004   | 0 | 0.26479264 | 0 | 0           | 0 | 0.012399203  | 0 |
| 0 | 0.56902378   | 0 | 0.48902996 | 0 | -0.21824511 | 0 | 0.009062257  | 0 |
| 0 | -0.062495914 | 0 | 0.50090452 | 0 | -0.22161991 | 0 | -0.005997348 | 0 |
| 0 | 0            | 0 | 0.47988944 | 0 | -0.21990735 | 0 | 0.01269358   | 0 |
| 0 | -0.037680356 | 0 | 0.47949996 | 0 | -0.21831854 | 0 | 0.013337082  | 0 |
| 0 | 0.57640132   | 0 | 0          | 0 | 0.25705082  | 0 | 0            | 0 |
| 0 | 0.57607664   | 0 | 0          | 0 | 0.2553516   | 0 | -0.003939834 | 0 |
| 0 | 0.62650326   | 0 | 0.44212936 | 0 | -0.24285423 | 0 | 0            | 0 |
| 0 | 0.62651324   | 0 | 0.44551762 | 0 | -0.24206718 | 0 | -0.006049177 | 0 |
| 0 | 0.62651276   | 0 | 0.44569403 | 0 | -0.24336769 | 0 | 0            | 0 |
| 0 | 0.43690804   | 0 | 0.49645743 | 0 | -0.30535013 | 0 | 0            | 0 |
| 0 | 0.43737169   | 0 | 0.49572178 | 0 | -0.30617456 | 0 | 0            | 0 |
| 0 | 0.43955636   | 0 | 0.49351586 | 0 | -0.30774085 | 0 | 0.002662986  | 0 |
| 0 | 0.62651231   | 0 | 0.20491118 | 0 | 0           | 0 | -0.0044817   | 0 |
| 0 | 0.62647926   | 0 | 0.20493077 | 0 | 0           | 0 | 0            | 0 |
| 0 | 0.62652174   | 0 | 0.20781513 | 0 | 0           | 0 | -0.006411187 | 0 |
| 0 | 0            | 0 | 0          | 0 | 0.25688225  | 0 | -0.00628907  | 0 |
| 0 | 0.075479558  | 0 | 0.44098752 | 0 | -0.2416442  | 0 | 0            | 0 |
| 0 | 0.075298867  | 0 | 0.44038461 | 0 | -0.24140769 | 0 | -0.002244419 | 0 |
| 0 | 0.43093499   | 0 | 0.49497235 | 0 | -0.30631827 | 0 | 0            | 0 |
| 0 | 0.066445392  | 0 | 0.44480512 | 0 | -0.24133652 | 0 | -0.005199569 | 0 |
| 0 | -0.044614703 | 0 | 0          | 0 | 0.2581618   | 0 | -0.005351615 | 0 |
| 0 | 0.4320545    | 0 | 0.49417813 | 0 | -0.30774244 | 0 | 0.002127382  | 0 |
| 0 | 0.43306338   | 0 | 0.49054672 | 0 | -0.30897522 | 0 | 0.004792441  | 0 |
| 0 | 0            | 0 | 0.44269674 | 0 | -0.24340991 | 0 | 0            | 0 |
| 0 | 0            | 0 | 0.44192137 | 0 | -0.24311781 | 0 | -0.002917801 | 0 |
| 0 | 0            | 0 | 0.44573155 | 0 | -0.24294361 | 0 | -0.005587347 | 0 |
| 0 | 0.55828134   | 0 | 0          | 0 | 0.27055275  | 0 | -0.008227149 | 0 |
| 0 | 0.60249224   | 0 | 0.46111495 | 0 | -0.22078492 | 0 | 0.046958768  | 0 |
| 0 | 0.58414202   | 0 | 0          | 0 | 0.25256443  | 0 | 0.011292454  | 0 |
| 0 | 0            | 0 | 0.49691404 | 0 | -0.30545039 | 0 | -0.001904447 | 0 |
| 0 | 0            | 0 | 0.49704171 | 0 | -0.30579616 | 0 | 0            | 0 |
| 0 | 0            | 0 | 0.49597647 | 0 | -0.30692636 | 0 | -3.54E-05    | 0 |
| 0 | 0            | 0 | 0.45129285 | 0 | -0.25195426 | 0 | -0.008048866 | 0 |
| 0 | 0.07808411   | 0 | 0.20507822 | 0 | 0           | 0 | -0.003902838 | 0 |
| 0 | 0.43644206   | 0 | 0.1977294  | 0 | 0           | 0 | -0.002159034 | 0 |
| 0 | 0.43680778   | 0 | 0.19834017 | 0 | 0           | 0 | 0            | 0 |
| 0 | 0.43711335   | 0 | 0.1964871  | 0 | 0           | 0 | -0.00104147  | 0 |
| 0 | 0            | 0 | 0.49540278 | 0 | -0.30675903 | 0 | -0.000207435 | 0 |

|   |             |   |            |   |             |              |              |
|---|-------------|---|------------|---|-------------|--------------|--------------|
| 0 | 0           | 0 | 0.20508899 | 0 | 0           | -0.004689333 | 0            |
| 0 | 0.62288501  | 0 | 0.46803754 | 0 | -0.23448606 | 0            | 0            |
| 0 | 0.62262897  | 0 | 0.46744045 | 0 | -0.23461726 | 0            | -0.001306745 |
| 0 | -0.18562409 | 0 | 0.49710208 | 0 | -0.30591096 | 0            | 0            |
| 0 | -0.18620876 | 0 | 0.4975227  | 0 | -0.30555446 | 0            | -0.00103712  |
| 0 | 0.43050863  | 0 | 0.19574808 | 0 | 0           | 0            | -0.000946417 |
| 0 | 0.62666065  | 0 | 0          | 0 | 0           | 0            | -0.029781836 |
| 0 | -0.18439022 | 0 | 0.49611851 | 0 | -0.3073671  | 0            | 0.00139971   |
| 0 | 3.1239296   | 0 | 0.23793363 | 0 | 0           | 0            | -0.003734381 |
| 0 | -0.19128398 | 0 | 0.49558894 | 0 | -0.30712635 | 0            | 0.001097768  |
| 0 | 0.62649834  | 0 | 0          | 0 | 0.19053777  | 0            | -0.005104763 |
| 0 | 0.62647914  | 0 | 0          | 0 | 0.19028606  | 0            | 0            |
| 0 | 0.62651842  | 0 | 0          | 0 | 0.1946184   | 0            | -0.007826904 |
| 0 | 3.132976    | 0 | 0.46094505 | 0 | -0.22959256 | 0            | 0.011284259  |
| 0 | 0           | 0 | 0.19842572 | 0 | 0           | 0            | -0.003178881 |
| 0 | 0           | 0 | 0.46830336 | 0 | -0.23535892 | 0            | -0.002660482 |
| 0 | 0.002457907 | 0 | 0.4679405  | 0 | -0.23337072 | 0            | -0.001779604 |
| 0 | -0.18621618 | 0 | 0.19832762 | 0 | 0           | 0            | -0.001930705 |
| 0 | 0.080292875 | 0 | 0          | 0 | 0.19052365  | 0            | -0.004349602 |
| 0 | 0           | 0 | 0          | 0 | 0.19048761  | 0            | -0.005129464 |
| 0 | 0.43528228  | 0 | 0          | 0 | 0.18274539  | 0            | -0.003316342 |
| 0 | 0.4365694   | 0 | 0          | 0 | 0.18180993  | 0            | 0            |
| 0 | 0.43668919  | 0 | 0          | 0 | 0.18018571  | 0            | -0.001422751 |
| 0 | 0.43036204  | 0 | 0          | 0 | 0.17924611  | 0            | -0.001175156 |
| 0 | 0           | 0 | 0          | 0 | 0.18192378  | 0            | -0.003371904 |
| 0 | 0.4098838   | 0 | 0.51321472 | 0 | -0.27792347 | 0            | 0            |
| 0 | 0.41091055  | 0 | 0.51516352 | 0 | -0.27549763 | 0            | -0.000937825 |
| 0 | 0.62358351  | 0 | 0          | 0 | 0.22629563  | 0            | -0.003972553 |
| 0 | 0.4110801   | 0 | 0.51232599 | 0 | -0.27941068 | 0            | 0.002144211  |
| 0 | -0.1865136  | 0 | 0          | 0 | 0.18181335  | 0            | -0.002124737 |
| 0 | 0           | 0 | 0.5137443  | 0 | -0.27853885 | 0            | -0.000729005 |
| 0 | 0.41015214  | 0 | 0.24045092 | 0 | 0           | 0            | -0.001409091 |
| 0 | -0.21256792 | 0 | 0.51389844 | 0 | -0.27842121 | 0            | 0.000543389  |
| 0 | 0.41276028  | 0 | 0.50150996 | 0 | -0.27411966 | 0            | 0.021207371  |
| 0 | 0.40866076  | 0 | 0          | 0 | 0.22642923  | 0            | -0.001735119 |
| 0 | 0.62650403  | 0 | 0.46962021 | 0 | -0.24864216 | 0            | 0            |
| 0 | 0.62647131  | 0 | 0.46935456 | 0 | -0.24617515 | 0            | -0.00961061  |
| 0 | 0.62650901  | 0 | 0.22687941 | 0 | 0           | 0            | -0.009563498 |
| 0 | 0.62683502  | 0 | 0.48755333 | 0 | -0.24794067 | 0            | -0.01952594  |
| 0 | 0.049536531 | 0 | 0.46742213 | 0 | -0.24600476 | 0            | -0.007497673 |
| 0 | 0.61706335  | 0 | 0.48604144 | 0 | -0.24079909 | 0            | -0.007278632 |
| 0 | 0           | 0 | 0.469002   | 0 | -0.24766733 | 0            | -0.008298445 |
| 0 | 0           | 0 | 0.4975843  | 0 | -0.30859477 | 0            | 0.039647841  |
| 0 | 0.62651003  | 0 | 0          | 0 | 0.21234978  | 0            | -0.010130617 |
| 0 | 0.62646845  | 0 | 0          | 0 | 0           | 0            | 0.001295433  |
| 0 | 0.43796476  | 0 | 0          | 0 | 0           | 0            | 0.003151271  |
| 0 | 0.37158853  | 0 | 0.50729395 | 0 | -0.30975162 | 0            | 0            |

|   |             |   |            |   |             |   |              |   |
|---|-------------|---|------------|---|-------------|---|--------------|---|
| 0 | 0.37426967  | 0 | 0.50740049 | 0 | -0.31184807 | 0 | 0.007427742  | 0 |
| 0 | 0           | 0 | 0.50843087 | 0 | -0.31105563 | 0 | 0.005302091  | 0 |
| 0 | 0.37289798  | 0 | 0.20450276 | 0 | 0           | 0 | 0.004634092  | 0 |
| 0 | -0.24999494 | 0 | 0.5088272  | 0 | -0.31152725 | 0 | 0.00675517   | 0 |
| 0 | 0.5024862   | 0 | 0          | 0 | 0           | 0 | 0.005246185  | 0 |
| 0 | 0.37828902  | 0 | 0.49268217 | 0 | -0.3454236  | 0 | 0.007797323  | 0 |
| 0 | 0.3797111   | 0 | 0.48953335 | 0 | -0.32358757 | 0 | 0.027533614  | 0 |
| 0 | 0.37240455  | 0 | 0          | 0 | 0.18772343  | 0 | 0.004428434  | 0 |
| 0 | 0.37105898  | 0 | 0.52649847 | 0 | -0.30993285 | 0 | 0.000819168  | 0 |
| 0 | 0.62643913  | 0 | 0.43481716 | 0 | -0.24174862 | 0 | 0            | 0 |
| 0 | 0.6264749   | 0 | 0.43257931 | 0 | -0.24025368 | 0 | -0.008904891 | 0 |
| 0 | 0.62643821  | 0 | 0.43405743 | 0 | -0.24170433 | 0 | 0            | 0 |
| 0 | 0.62644533  | 0 | 0.198855   | 0 | 0           | 0 | -0.010592045 | 0 |
| 0 | 0.62643718  | 0 | 0.19834616 | 0 | 0           | 0 | -0.010406042 | 0 |
| 0 | 0.62641764  | 0 | 0.19881579 | 0 | 0           | 0 | 0            | 0 |
| 0 | 0.12756956  | 0 | 0.43225919 | 0 | -0.23931362 | 0 | -0.008541009 | 0 |
| 0 | 0.12914891  | 0 | 0.43379894 | 0 | -0.24063526 | 0 | 0            | 0 |
| 0 | 0.12652475  | 0 | 0.43175711 | 0 | -0.23909847 | 0 | -0.008532202 | 0 |
| 0 | 0           | 0 | 0.43364708 | 0 | -0.24090895 | 0 | -0.009085206 | 0 |
| 0 | 0           | 0 | 0.43323807 | 0 | -0.24058044 | 0 | -0.009227608 | 0 |
| 0 | 0           | 0 | 0.43536051 | 0 | -0.24223833 | 0 | 0            | 0 |
| 0 | 0.13015932  | 0 | 0.19916232 | 0 | 0           | 0 | -0.010238011 | 0 |
| 0 | 0           | 0 | 0.19917827 | 0 | 0           | 0 | -0.010928679 | 0 |
| 0 | 0.62643776  | 0 | 0          | 0 | 0.18464962  | 0 | -0.011163929 | 0 |
| 0 | 0.62643041  | 0 | 0          | 0 | 0.18399673  | 0 | -0.010848428 | 0 |
| 0 | 0.62626068  | 0 | 0          | 0 | 0.18432864  | 0 | 0            | 0 |
| 0 | 0           | 0 | 0.45006622 | 0 | -0.25647747 | 0 | -0.017684228 | 0 |
| 0 | 0.62664645  | 0 | 0.46522646 | 0 | -0.24152957 | 0 | -0.027488182 | 0 |
| 0 | 0.62662997  | 0 | 0.46501009 | 0 | -0.2461292  | 0 | 0            | 0 |
| 0 | 0.62645254  | 0 | 0.46865153 | 0 | -0.23863596 | 0 | -0.032397923 | 0 |
| 0 | 0.62661166  | 0 | 0.22396511 | 0 | 0           | 0 | -0.025647344 | 0 |
| 0 | 0.13235475  | 0 | 0          | 0 | 0.18477734  | 0 | -0.010646323 | 0 |
| 0 | 0.066297942 | 0 | 0.46019912 | 0 | -0.24052316 | 0 | -0.024467124 | 0 |
| 0 | 0           | 0 | 0          | 0 | 0.18475248  | 0 | -0.01133095  | 0 |
| 0 | 0           | 0 | 0.46107572 | 0 | -0.24213335 | 0 | -0.024853213 | 0 |
| 0 | 0.62661789  | 0 | 0          | 0 | 0.21052274  | 0 | -0.027001563 | 0 |
| 0 | 0.62640366  | 0 | 0          | 0 | 0           | 0 | -0.005299886 | 0 |
| 0 | 0.57407725  | 0 | 0.4901911  | 0 | -0.22490679 | 0 | 0            | 0 |
| 0 | 0.57423032  | 0 | 0.48881163 | 0 | -0.22537035 | 0 | -0.002228617 | 0 |
| 0 | 0.57627264  | 0 | 0.27014135 | 0 | 0           | 0 | -0.005313883 | 0 |
| 0 | 0           | 0 | 0.49034251 | 0 | -0.22533102 | 0 | -0.004640622 | 0 |
| 0 | -0.04649555 | 0 | 0.48973469 | 0 | -0.22344474 | 0 | -0.0037007   | 0 |
| 0 | 0.55705732  | 0 | 0.5006041  | 0 | -0.22228485 | 0 | -0.006484705 | 0 |
| 0 | 0.58267399  | 0 | 0.47894775 | 0 | -0.21870934 | 0 | 0.013642864  | 0 |
| 0 | 0.57482767  | 0 | 0          | 0 | 0.25735975  | 0 | -0.005857556 | 0 |
| 0 | 0.62648843  | 0 | 0.44163768 | 0 | -0.24228312 | 0 | -0.003284089 | 0 |
| 0 | 0.62646851  | 0 | 0.44214759 | 0 | -0.24284157 | 0 | 0            | 0 |

|   |             |   |            |   |             |   |              |   |
|---|-------------|---|------------|---|-------------|---|--------------|---|
| 0 | 0.62649935  | 0 | 0.44454863 | 0 | -0.24237304 | 0 | -0.00513456  | 0 |
| 0 | 0.43663519  | 0 | 0.49626153 | 0 | -0.3051807  | 0 | -0.001060989 | 0 |
| 0 | 0.43682444  | 0 | 0.49659343 | 0 | -0.30530295 | 0 | 0            | 0 |
| 0 | 0.43745319  | 0 | 0.4957547  | 0 | -0.30623962 | 0 | 0.000203797  | 0 |
| 0 | 0.62647281  | 0 | 0.20510688 | 0 | 0           | 0 | -0.004637129 | 0 |
| 0 | 0.074830606 | 0 | 0.44061888 | 0 | -0.24116435 | 0 | -0.002615226 | 0 |
| 0 | 0.43105541  | 0 | 0.49501936 | 0 | -0.30637974 | 0 | 0.000386556  | 0 |
| 0 | 0           | 0 | 0.44222031 | 0 | -0.24278982 | 0 | -0.003398062 | 0 |
| 0 | 0           | 0 | 0.49663608 | 0 | -0.30531671 | 0 | -0.001814918 | 0 |
| 0 | 0.43602678  | 0 | 0.19844065 | 0 | 0           | 0 | -0.002608491 | 0 |
| 0 | 0.62228867  | 0 | 0.46773043 | 0 | -0.23406849 | 0 | -0.002251687 | 0 |
| 0 | -0.18579393 | 0 | 0.49703002 | 0 | -0.30581485 | 0 | -0.000568358 | 0 |
| 0 | 0.62647218  | 0 | 0          | 0 | 0.1905106   | 0 | -0.005077673 | 0 |
| 0 | 0.43573102  | 0 | 0          | 0 | 0.18193277  | 0 | -0.002801898 | 0 |
| 0 | 0.40983122  | 0 | 0.51319276 | 0 | -0.27789242 | 0 | -0.000161195 | 0 |
| 0 | 0.62648312  | 0 | 0.46837042 | 0 | -0.24705889 | 0 | -0.008247721 | 0 |
| 0 | 0.37331931  | 0 | 0.50802366 | 0 | -0.31073602 | 0 | 0.006054937  | 0 |
| 0 | 0.62642787  | 0 | 0.43342628 | 0 | -0.24013436 | 0 | -0.009425594 | 0 |
| 0 | 0.62643027  | 0 | 0.43276433 | 0 | -0.24007284 | 0 | -0.0091724   | 0 |
| 0 | 0.62622331  | 0 | 0.43490512 | 0 | -0.24171861 | 0 | 0            | 0 |
| 0 | 0.62641379  | 0 | 0.19921904 | 0 | 0           | 0 | -0.010868009 | 0 |
| 0 | 0.12698189  | 0 | 0.43255877 | 0 | -0.23902455 | 0 | -0.008998301 | 0 |
| 0 | 0           | 0 | 0.43402845 | 0 | -0.24050651 | 0 | -0.009686103 | 0 |
| 0 | 0.6264109   | 0 | 0          | 0 | 0.18479642  | 0 | -0.011270727 | 0 |
| 0 | 0.62660183  | 0 | 0.45990323 | 0 | -0.24155686 | 0 | -0.024427634 | 0 |
| 0 | 0.572945    | 0 | 0.48964589 | 0 | -0.22414726 | 0 | -0.004208132 | 0 |
| 0 | 0.62646146  | 0 | 0.44167893 | 0 | -0.24223159 | 0 | -0.003347275 | 0 |
| 0 | 0.43645051  | 0 | 0.49644397 | 0 | -0.30510004 | 0 | -0.001245999 | 0 |
| 0 | 0.62639588  | 0 | 0.43355877 | 0 | -0.23999932 | 0 | -0.00962408  | 0 |

SUPPLEMENTARY TABLE 5

| Model   | BIC    | Loglike  | H2r       | SE | bsnp_rs2938864 | SE | bsnp_rs1001646 |
|---------|--------|----------|-----------|----|----------------|----|----------------|
| cov0    | 0      | -219.893 | 0.4180209 | 0  | 0              | 0  | 0              |
| cov1    | 0.4018 | -216.571 | 0.4185549 | 0  | -0.089374734   | 0  | 0              |
| cov6    | 0.4686 | -216.605 | 0.4191203 | 0  | 0              | 0  | 0              |
| cov2    | 1.0516 | -216.896 | 0.4213974 | 0  | 0              | 0  | -0.083996826   |
| cov5    | 2.4807 | -217.611 | 0.4212418 | 0  | 0              | 0  | 0              |
| cov4    | 3.1226 | -217.932 | 0.4244336 | 0  | 0              | 0  | 0              |
| cov10   | 3.1693 | -217.955 | 0.4115142 | 0  | 0              | 0  | 0              |
| cov9    | 3.8533 | -218.297 | 0.4117738 | 0  | 0              | 0  | 0              |
| cov11   | 4.0549 | -218.398 | 0.4151934 | 0  | 0              | 0  | 0              |
| cov8    | 5.7948 | -219.268 | 0.4184404 | 0  | 0              | 0  | 0              |
| cov7    | 5.8007 | -219.271 | 0.4184467 | 0  | 0              | 0  | 0              |
| cov1_10 | 6.4846 | -216.09  | 0.415162  | 0  | -0.073655875   | 0  | 0              |
| cov6_7  | 6.5391 | -216.117 | 0.4198951 | 0  | 0              | 0  | 0              |
| cov6_8  | 6.551  | -216.123 | 0.4198837 | 0  | 0              | 0  | 0              |
| cov1_8  | 6.5687 | -216.132 | 0.4193109 | 0  | -0.087034435   | 0  | 0              |
| cov1_7  | 6.5754 | -216.136 | 0.4193131 | 0  | -0.08703092    | 0  | 0              |
| cov6_10 | 6.6052 | -216.151 | 0.4155828 | 0  | 0              | 0  | 0              |
| cov5_10 | 6.6913 | -216.194 | 0.4151843 | 0  | 0              | 0  | 0              |
| cov2_10 | 6.8247 | -216.26  | 0.4171334 | 0  | 0              | 0  | -0.06814853    |
| cov3    | 6.915  | -219.828 | 0.4191744 | 0  | 0              | 0  | 0              |
| cov1_9  | 6.9164 | -216.306 | 0.4158491 | 0  | -0.076979755   | 0  | 0              |
| cov1_3  | 6.9416 | -216.319 | 0.4209892 | 0  | -0.092707934   | 0  | 0              |
| cov3_6  | 6.9959 | -216.346 | 0.4216259 | 0  | 0              | 0  | 0              |
| cov2_6  | 7.0079 | -216.352 | 0.4203444 | 0  | 0              | 0  | -0.039097963   |
| cov6_9  | 7.0206 | -216.358 | 0.4163222 | 0  | 0              | 0  | 0              |
| cov2_8  | 7.0999 | -216.398 | 0.4220827 | 0  | 0              | 0  | -0.082280415   |
| cov2_7  | 7.1056 | -216.401 | 0.4220849 | 0  | 0              | 0  | -0.082282256   |
| cov1_6  | 7.1776 | -216.437 | 0.4188528 | 0  | -0.049186229   | 0  | 0              |
| cov1_2  | 7.2002 | -216.448 | 0.4196684 | 0  | -0.061874931   | 0  | -0.032085332   |
| cov2_9  | 7.2824 | -216.489 | 0.4177545 | 0  | 0              | 0  | -0.070812972   |
| cov1_11 | 7.3016 | -216.499 | 0.4196789 | 0  | -0.10512834    | 0  | 0              |
| cov4_10 | 7.3238 | -216.51  | 0.4180482 | 0  | 0              | 0  | 0              |
| cov1_5  | 7.4038 | -216.55  | 0.4180409 | 0  | -0.10196064    | 0  | 0              |
| cov4_6  | 7.4122 | -216.554 | 0.4204224 | 0  | 0              | 0  | 0              |
| cov5_9  | 7.4231 | -216.559 | 0.4156576 | 0  | 0              | 0  | 0              |
| cov1_4  | 7.4325 | -216.564 | 0.4190855 | 0  | -0.084872118   | 0  | 0              |
| cov6_11 | 7.4798 | -216.588 | 0.4196407 | 0  | 0              | 0  | 0              |
| cov5_6  | 7.4816 | -216.589 | 0.4194446 | 0  | 0              | 0  | 0              |
| cov2_3  | 7.6128 | -216.654 | 0.4238906 | 0  | 0              | 0  | -0.087246966   |
| cov2_5  | 7.8785 | -216.787 | 0.4216609 | 0  | 0              | 0  | -0.066069871   |
| cov4_9  | 8.0023 | -216.849 | 0.4184662 | 0  | 0              | 0  | 0              |
| cov2_11 | 8.0875 | -216.892 | 0.4210488 | 0  | 0              | 0  | -0.080995493   |
| cov2_4  | 8.0962 | -216.896 | 0.4214575 | 0  | 0              | 0  | -0.083169304   |
| cov5_8  | 8.4052 | -217.051 | 0.4219813 | 0  | 0              | 0  | 0              |
| cov5_7  | 8.4142 | -217.055 | 0.4219836 | 0  | 0              | 0  | 0              |

|           |         |          |           |   |              |   |              |
|-----------|---------|----------|-----------|---|--------------|---|--------------|
| cov10_11  | 8.7649  | -217.23  | 0.4108629 | 0 | 0            | 0 | 0            |
| cov8_11   | 9.2645  | -217.48  | 0.4158519 | 0 | 0            | 0 | 0            |
| cov7_11   | 9.2665  | -217.481 | 0.415858  | 0 | 0            | 0 | 0            |
| cov7_10   | 9.3347  | -217.515 | 0.4121184 | 0 | 0            | 0 | 0            |
| cov8_10   | 9.3352  | -217.515 | 0.4121186 | 0 | 0            | 0 | 0            |
| cov5_11   | 9.3594  | -217.528 | 0.419718  | 0 | 0            | 0 | 0            |
| cov9_11   | 9.3868  | -217.541 | 0.4112449 | 0 | 0            | 0 | 0            |
| cov4_8    | 9.3961  | -217.546 | 0.4245315 | 0 | 0            | 0 | 0            |
| cov4_7    | 9.4044  | -217.55  | 0.4245328 | 0 | 0            | 0 | 0            |
| cov4_5    | 9.4485  | -217.572 | 0.4222968 | 0 | 0            | 0 | 0            |
| cov3_10   | 9.4824  | -217.589 | 0.4132819 | 0 | 0            | 0 | 0            |
| cov3_5    | 9.4985  | -217.597 | 0.4218089 | 0 | 0            | 0 | 0            |
| cov4_11   | 9.6052  | -217.651 | 0.4212334 | 0 | 0            | 0 | 0            |
| cov9_10   | 9.8623  | -217.779 | 0.4121068 | 0 | 0            | 0 | 0            |
| cov8_9    | 9.9827  | -217.839 | 0.4123983 | 0 | 0            | 0 | 0            |
| cov7_9    | 9.9828  | -217.839 | 0.4123979 | 0 | 0            | 0 | 0            |
| cov3_4    | 10.1639 | -217.93  | 0.4246093 | 0 | 0            | 0 | 0            |
| cov3_9    | 10.2699 | -217.983 | 0.4134228 | 0 | 0            | 0 | 0            |
| cov3_11   | 10.485  | -218.09  | 0.4175235 | 0 | 0            | 0 | 0            |
| cov3_8    | 12.5787 | -219.137 | 0.4165256 | 0 | 0            | 0 | 0            |
| cov3_7    | 12.5799 | -219.138 | 0.4165101 | 0 | 0            | 0 | 0            |
| cov1_3_10 | 12.6657 | -215.658 | 0.4174896 | 0 | -0.075005828 | 0 | 0            |
| cov1_9_10 | 12.7062 | -215.679 | 0.4163334 | 0 | -0.079134542 | 0 | 0            |
| cov1_8_10 | 12.7734 | -215.712 | 0.4159889 | 0 | -0.072468902 | 0 | 0            |
| cov1_7_10 | 12.7767 | -215.714 | 0.4159854 | 0 | -0.072434118 | 0 | 0            |
| cov3_6_10 | 12.786  | -215.718 | 0.4179203 | 0 | 0            | 0 | 0            |
| cov6_7_10 | 12.8128 | -215.732 | 0.4164822 | 0 | 0            | 0 | 0            |
| cov6_8_10 | 12.824  | -215.737 | 0.4164701 | 0 | 0            | 0 | 0            |
| cov7_8    | 12.8395 | -219.268 | 0.4184422 | 0 | 0            | 0 | 0            |
| cov6_9_10 | 12.8497 | -215.75  | 0.4167972 | 0 | 0            | 0 | 0            |
| cov5_8_10 | 12.9103 | -215.781 | 0.4160543 | 0 | 0            | 0 | 0            |
| cov5_7_10 | 12.9133 | -215.782 | 0.4160506 | 0 | 0            | 0 | 0            |
| cov2_3_10 | 12.9737 | -215.812 | 0.4195679 | 0 | 0            | 0 | -0.069869332 |
| cov5_9_10 | 13.0157 | -215.833 | 0.4162511 | 0 | 0            | 0 | 0            |
| cov2_8_10 | 13.0427 | -215.847 | 0.41795   | 0 | 0            | 0 | -0.067622445 |
| cov2_7_10 | 13.0447 | -215.848 | 0.4179466 | 0 | 0            | 0 | -0.067598863 |
| cov2_6_7  | 13.1005 | -215.876 | 0.4211105 | 0 | 0            | 0 | -0.038227899 |
| cov2_6_8  | 13.1063 | -215.879 | 0.4211094 | 0 | 0            | 0 | -0.0384701   |
| cov1_8_9  | 13.1711 | -215.911 | 0.4167217 | 0 | -0.075796676 | 0 | 0            |
| cov1_7_9  | 13.1752 | -215.913 | 0.4167172 | 0 | -0.075759501 | 0 | 0            |
| cov6_7_9  | 13.1898 | -215.92  | 0.4172761 | 0 | 0            | 0 | 0            |
| cov6_8_9  | 13.2011 | -215.926 | 0.4172636 | 0 | 0            | 0 | 0            |
| cov1_3_9  | 13.2098 | -215.93  | 0.4180549 | 0 | -0.078222526 | 0 | 0            |
| cov2_6_10 | 13.233  | -215.942 | 0.4169756 | 0 | 0            | 0 | -0.035574049 |
| cov2_9_10 | 13.2336 | -215.942 | 0.4182235 | 0 | 0            | 0 | -0.071357612 |
| cov3_6_9  | 13.3114 | -215.981 | 0.418544  | 0 | 0            | 0 | 0            |
| cov1_6_7  | 13.3146 | -215.983 | 0.4196571 | 0 | -0.044125777 | 0 | 0            |

|            |         |          |           |   |              |   |              |
|------------|---------|----------|-----------|---|--------------|---|--------------|
| cov1_6_8   | 13.3175 | -215.984 | 0.4196453 | 0 | -0.04483622  | 0 | 0            |
| cov2_5_10  | 13.3182 | -215.985 | 0.4167126 | 0 | 0            | 0 | -0.036486406 |
| cov1_2_10  | 13.3271 | -215.989 | 0.4163078 | 0 | -0.049080418 | 0 | -0.029081383 |
| cov5_6_10  | 13.3327 | -215.992 | 0.4157814 | 0 | 0            | 0 | 0            |
| cov1_2_8   | 13.3474 | -215.999 | 0.4204846 | 0 | -0.058433777 | 0 | -0.033340998 |
| cov1_2_7   | 13.3538 | -216.002 | 0.4204875 | 0 | -0.058409947 | 0 | -0.033363863 |
| cov3_5_10  | 13.3588 | -216.005 | 0.4165399 | 0 | 0            | 0 | 0            |
| cov4_6_10  | 13.3623 | -216.007 | 0.4173616 | 0 | 0            | 0 | 0            |
| cov1_6_10  | 13.3792 | -216.015 | 0.4155379 | 0 | -0.044222735 | 0 | 0            |
| cov1_4_10  | 13.3845 | -216.018 | 0.4165388 | 0 | -0.057203095 | 0 | 0            |
| cov1_10_11 | 13.416  | -216.033 | 0.4162008 | 0 | -0.087828166 | 0 | 0            |
| cov1_5_10  | 13.4284 | -216.04  | 0.4153531 | 0 | -0.048591946 | 0 | 0            |
| cov2_8_9   | 13.4643 | -216.058 | 0.4186158 | 0 | 0            | 0 | -0.070298262 |
| cov2_7_9   | 13.467  | -216.059 | 0.4186115 | 0 | 0            | 0 | -0.070273239 |
| cov2_3_6   | 13.4885 | -216.07  | 0.4230296 | 0 | 0            | 0 | -0.040907623 |
| cov2_3_9   | 13.5392 | -216.095 | 0.4200678 | 0 | 0            | 0 | -0.072459579 |
| cov4_6_7   | 13.5452 | -216.098 | 0.4206765 | 0 | 0            | 0 | 0            |
| cov5_6_7   | 13.5453 | -216.098 | 0.4202674 | 0 | 0            | 0 | 0            |
| cov4_6_8   | 13.555  | -216.103 | 0.4206875 | 0 | 0            | 0 | 0            |
| cov5_6_8   | 13.555  | -216.103 | 0.4202673 | 0 | 0            | 0 | 0            |
| cov3_6_7   | 13.5799 | -216.115 | 0.4201477 | 0 | 0            | 0 | 0            |
| cov6_7_11  | 13.5806 | -216.116 | 0.4197406 | 0 | 0            | 0 | 0            |
| cov6_7_8   | 13.5831 | -216.117 | 0.419897  | 0 | 0            | 0 | 0            |
| cov3_6_8   | 13.5906 | -216.121 | 0.4201702 | 0 | 0            | 0 | 0            |
| cov6_8_11  | 13.5925 | -216.122 | 0.419727  | 0 | 0            | 0 | 0            |
| cov1_5_8   | 13.593  | -216.122 | 0.4189387 | 0 | -0.095795888 | 0 | 0            |
| cov5_8_9   | 13.5989 | -216.125 | 0.4165625 | 0 | 0            | 0 | 0            |
| cov1_5_7   | 13.5994 | -216.125 | 0.4189383 | 0 | -0.095857823 | 0 | 0            |
| cov1_8_11  | 13.6001 | -216.126 | 0.4196324 | 0 | -0.09213401  | 0 | 0            |
| cov5_7_9   | 13.6026 | -216.127 | 0.4165581 | 0 | 0            | 0 | 0            |
| cov1_3_8   | 13.6038 | -216.127 | 0.4196911 | 0 | -0.087898443 | 0 | 0            |
| cov1_7_11  | 13.607  | -216.129 | 0.4196326 | 0 | -0.092099769 | 0 | 0            |
| cov1_3_7   | 13.6106 | -216.131 | 0.4196923 | 0 | -0.087896699 | 0 | 0            |
| cov1_4_8   | 13.6132 | -216.132 | 0.4193959 | 0 | -0.086297596 | 0 | 0            |
| cov1_7_8   | 13.6136 | -216.132 | 0.4193106 | 0 | -0.087035356 | 0 | 0            |
| cov1_4_7   | 13.62   | -216.135 | 0.4193946 | 0 | -0.086324186 | 0 | 0            |
| cov2_6_9   | 13.6217 | -216.136 | 0.4177269 | 0 | 0            | 0 | -0.036691746 |
| cov6_10_11 | 13.6263 | -216.139 | 0.4160271 | 0 | 0            | 0 | 0            |
| cov1_3_5   | 13.6716 | -216.161 | 0.4202413 | 0 | -0.1315831   | 0 | 0            |
| cov1_3_6   | 13.6879 | -216.169 | 0.421389  | 0 | -0.050433462 | 0 | 0            |
| cov4_5_10  | 13.7056 | -216.178 | 0.4159196 | 0 | 0            | 0 | 0            |
| cov1_2_3   | 13.7103 | -216.181 | 0.4222502 | 0 | -0.063671747 | 0 | -0.03399479  |
| cov5_10_11 | 13.7338 | -216.192 | 0.4153138 | 0 | 0            | 0 | 0            |
| cov1_2_9   | 13.7411 | -216.196 | 0.4170114 | 0 | -0.051286979 | 0 | -0.03033212  |
| cov2_4_10  | 13.7528 | -216.202 | 0.4179088 | 0 | 0            | 0 | -0.050281324 |
| cov1_6_9   | 13.7843 | -216.218 | 0.416286  | 0 | -0.045093564 | 0 | 0            |
| cov4_9_10  | 13.7913 | -216.221 | 0.4190957 | 0 | 0            | 0 | 0            |



|            |         |          |           |   |              |              |
|------------|---------|----------|-----------|---|--------------|--------------|
| cov4_8_10  | 13.8039 | -216.227 | 0.4183032 | 0 | 0            | 0            |
| cov4_7_10  | 13.8069 | -216.229 | 0.4182984 | 0 | 0            | 0            |
| cov1_9_11  | 13.8362 | -216.244 | 0.416934  | 0 | -0.091831322 | 0            |
| cov4_6_9   | 13.8369 | -216.244 | 0.4178915 | 0 | 0            | 0            |
| cov5_6_9   | 13.861  | -216.256 | 0.4164791 | 0 | 0            | 0            |
| cov1_4_9   | 13.8625 | -216.257 | 0.4169706 | 0 | -0.063304519 | 0            |
| cov2_10_11 | 13.8685 | -216.26  | 0.4170212 | 0 | 0            | -0.067154841 |
| cov2_5_9   | 13.8876 | -216.269 | 0.4174493 | 0 | 0            | -0.042845262 |
| cov2_6_11  | 13.9067 | -216.279 | 0.4216911 | 0 | 0            | -0.044779839 |
| cov2_5_8   | 13.9142 | -216.283 | 0.4224016 | 0 | 0            | -0.063838861 |
| cov2_5_7   | 13.921  | -216.286 | 0.4224031 | 0 | 0            | -0.063884538 |
| cov1_3_11  | 13.9285 | -216.29  | 0.4215441 | 0 | -0.10264791  | 0            |
| cov1_5_9   | 13.9343 | -216.293 | 0.4159449 | 0 | -0.064031203 | 0            |
| cov1_3_4   | 13.9615 | -216.306 | 0.4204431 | 0 | -0.099444163 | 0            |
| cov1_2_6   | 13.9945 | -216.323 | 0.4199444 | 0 | -0.024104387 | -0.030874178 |
| cov3_4_6   | 14.0345 | -216.343 | 0.4218743 | 0 | 0            | 0            |
| cov2_4_6   | 14.0356 | -216.343 | 0.4198613 | 0 | 0            | -0.044444091 |
| cov1_6_11  | 14.0363 | -216.344 | 0.420128  | 0 | -0.063952035 | 0            |
| cov3_5_6   | 14.0369 | -216.344 | 0.4215735 | 0 | 0            | 0            |
| cov6_9_11  | 14.0369 | -216.344 | 0.4168071 | 0 | 0            | 0            |
| cov3_6_11  | 14.0388 | -216.345 | 0.4217234 | 0 | 0            | 0            |
| cov2_8_11  | 14.0389 | -216.345 | 0.4209412 | 0 | 0            | -0.071576597 |
| cov2_7_11  | 14.044  | -216.347 | 0.4209408 | 0 | 0            | -0.071542907 |
| cov2_5_6   | 14.0489 | -216.35  | 0.4202691 | 0 | 0            | -0.040313205 |
| cov1_2_11  | 14.0651 | -216.358 | 0.4210217 | 0 | -0.077494733 | -0.034405283 |
| cov3_4_10  | 14.0867 | -216.369 | 0.4188852 | 0 | 0            | 0            |
| cov2_4_8   | 14.129  | -216.39  | 0.4216766 | 0 | 0            | -0.088151078 |
| cov2_4_7   | 14.1343 | -216.393 | 0.4216745 | 0 | 0            | -0.088219648 |
| cov2_3_8   | 14.1441 | -216.398 | 0.4221897 | 0 | 0            | -0.082486006 |
| cov2_7_8   | 14.1447 | -216.398 | 0.4220831 | 0 | 0            | -0.082279559 |
| cov2_3_7   | 14.1499 | -216.4   | 0.4221853 | 0 | 0            | -0.082475437 |
| cov3_5_9   | 14.1727 | -216.412 | 0.416855  | 0 | 0            | 0            |
| cov1_5_6   | 14.1822 | -216.417 | 0.4183533 | 0 | -0.061579853 | 0            |
| cov1_2_5   | 14.1946 | -216.423 | 0.4191352 | 0 | -0.075100891 | -0.032593303 |
| cov1_4_6   | 14.2119 | -216.431 | 0.4193199 | 0 | -0.045543275 | 0            |
| cov1_2_4   | 14.2226 | -216.437 | 0.4190996 | 0 | -0.063609896 | -0.037701456 |
| cov2_4_9   | 14.2567 | -216.454 | 0.4183595 | 0 | 0            | -0.056962916 |
| cov4_10_11 | 14.2584 | -216.455 | 0.4169619 | 0 | 0            | 0            |
| cov1_5_11  | 14.3045 | -216.478 | 0.4191604 | 0 | -0.11752785  | 0            |
| cov2_9_11  | 14.3265 | -216.489 | 0.4176593 | 0 | 0            | -0.069949244 |
| cov1_4_5   | 14.3331 | -216.492 | 0.4193058 | 0 | -0.10299706  | 0            |
| cov1_4_11  | 14.3333 | -216.492 | 0.4201856 | 0 | -0.10074533  | 0            |
| cov4_6_11  | 14.4055 | -216.528 | 0.4212052 | 0 | 0            | 0            |
| cov4_5_9   | 14.4271 | -216.539 | 0.4164981 | 0 | 0            | 0            |
| cov4_8_9   | 14.4504 | -216.551 | 0.418733  | 0 | 0            | 0            |
| cov4_5_6   | 14.452  | -216.551 | 0.420541  | 0 | 0            | 0            |
| cov4_7_9   | 14.454  | -216.552 | 0.4187274 | 0 | 0            | 0            |

|             |         |          |           |   |              |   |              |
|-------------|---------|----------|-----------|---|--------------|---|--------------|
| cov5_9_11   | 14.468  | -216.559 | 0.4156393 | 0 | 0            | 0 | 0            |
| cov5_6_11   | 14.4736 | -216.562 | 0.4202163 | 0 | 0            | 0 | 0            |
| cov7_10_11  | 14.4784 | -216.565 | 0.4117877 | 0 | 0            | 0 | 0            |
| cov8_10_11  | 14.4807 | -216.566 | 0.4117869 | 0 | 0            | 0 | 0            |
| cov2_3_4    | 14.5534 | -216.602 | 0.4232377 | 0 | 0            | 0 | -0.10471801  |
| cov2_3_5    | 14.5812 | -216.616 | 0.423779  | 0 | 0            | 0 | -0.075752093 |
| cov2_3_11   | 14.603  | -216.627 | 0.4231776 | 0 | 0            | 0 | -0.079898222 |
| cov3_10_11  | 14.6371 | -216.644 | 0.4131904 | 0 | 0            | 0 | 0            |
| cov2_4_5    | 14.7743 | -216.713 | 0.4200871 | 0 | 0            | 0 | -0.076925156 |
| cov3_4_9    | 14.8338 | -216.742 | 0.419191  | 0 | 0            | 0 | 0            |
| cov4_9_11   | 14.9118 | -216.781 | 0.4172996 | 0 | 0            | 0 | 0            |
| cov2_5_11   | 14.9194 | -216.785 | 0.4219215 | 0 | 0            | 0 | -0.067341119 |
| cov3_5_8    | 14.9305 | -216.791 | 0.4192761 | 0 | 0            | 0 | 0            |
| cov3_5_7    | 14.9345 | -216.793 | 0.4192592 | 0 | 0            | 0 | 0            |
| cov7_9_11   | 15.036  | -216.843 | 0.4122356 | 0 | 0            | 0 | 0            |
| cov8_9_11   | 15.0377 | -216.844 | 0.4122353 | 0 | 0            | 0 | 0            |
| cov5_8_11   | 15.0506 | -216.851 | 0.4197314 | 0 | 0            | 0 | 0            |
| cov5_7_11   | 15.0576 | -216.854 | 0.4197283 | 0 | 0            | 0 | 0            |
| cov2_4_11   | 15.1322 | -216.892 | 0.4211009 | 0 | 0            | 0 | -0.080320568 |
| cov9_10_11  | 15.2321 | -216.941 | 0.4115441 | 0 | 0            | 0 | 0            |
| cov3_9_11   | 15.3886 | -217.02  | 0.4134846 | 0 | 0            | 0 | 0            |
| cov4_5_8    | 15.4451 | -217.048 | 0.4222332 | 0 | 0            | 0 | 0            |
| cov5_7_8    | 15.4501 | -217.051 | 0.4219808 | 0 | 0            | 0 | 0            |
| cov4_5_7    | 15.4542 | -217.053 | 0.4222347 | 0 | 0            | 0 | 0            |
| cov4_8_11   | 15.4545 | -217.053 | 0.4203911 | 0 | 0            | 0 | 0            |
| cov4_7_11   | 15.4607 | -217.056 | 0.4203862 | 0 | 0            | 0 | 0            |
| cov3_4_8    | 15.9679 | -217.309 | 0.4220654 | 0 | 0            | 0 | 0            |
| cov3_4_7    | 15.9733 | -217.312 | 0.4220503 | 0 | 0            | 0 | 0            |
| cov7_9_10   | 16.022  | -217.336 | 0.4127375 | 0 | 0            | 0 | 0            |
| cov8_9_10   | 16.0223 | -217.337 | 0.4127373 | 0 | 0            | 0 | 0            |
| cov3_9_10   | 16.1624 | -217.407 | 0.4139124 | 0 | 0            | 0 | 0            |
| cov3_5_11   | 16.2782 | -217.465 | 0.4204642 | 0 | 0            | 0 | 0            |
| cov3_8_11   | 16.2896 | -217.47  | 0.4153787 | 0 | 0            | 0 | 0            |
| cov3_7_11   | 16.29   | -217.47  | 0.4153642 | 0 | 0            | 0 | 0            |
| cov7_8_11   | 16.3071 | -217.479 | 0.4158559 | 0 | 0            | 0 | 0            |
| cov3_8_10   | 16.3074 | -217.479 | 0.4127205 | 0 | 0            | 0 | 0            |
| cov3_7_10   | 16.3085 | -217.48  | 0.4127159 | 0 | 0            | 0 | 0            |
| cov4_5_11   | 16.3178 | -217.484 | 0.4207969 | 0 | 0            | 0 | 0            |
| cov7_8_10   | 16.3783 | -217.515 | 0.4121194 | 0 | 0            | 0 | 0            |
| cov4_7_8    | 16.4406 | -217.546 | 0.4245312 | 0 | 0            | 0 | 0            |
| cov3_4_5    | 16.4775 | -217.564 | 0.4226621 | 0 | 0            | 0 | 0            |
| cov3_4_11   | 16.5055 | -217.578 | 0.4217634 | 0 | 0            | 0 | 0            |
| cov3_8_9    | 17.0007 | -217.826 | 0.412764  | 0 | 0            | 0 | 0            |
| cov3_7_9    | 17.0018 | -217.826 | 0.4127576 | 0 | 0            | 0 | 0            |
| cov7_8_9    | 17.0261 | -217.839 | 0.4123995 | 0 | 0            | 0 | 0            |
| cov1_3_9_10 | 18.8546 | -215.23  | 0.4187735 | 0 | -0.080621799 | 0 | 0            |
| cov1_8_9_10 | 18.9952 | -215.301 | 0.417213  | 0 | -0.077949941 | 0 | 0            |

|              |         |          |           |   |              |              |
|--------------|---------|----------|-----------|---|--------------|--------------|
| cov3_6_9_10  | 18.9983 | -215.302 | 0.4192481 | 0 | 0            | 0            |
| cov1_7_9_10  | 18.9991 | -215.303 | 0.4172091 | 0 | -0.077913848 | 0            |
| cov6_7_9_10  | 19.0517 | -215.329 | 0.4177585 | 0 | 0            | 0            |
| cov6_8_9_10  | 19.0633 | -215.335 | 0.4177449 | 0 | 0            | 0            |
| cov5_8_9_10  | 19.2294 | -215.418 | 0.4171745 | 0 | 0            | 0            |
| cov5_7_9_10  | 19.2329 | -215.419 | 0.4171705 | 0 | 0            | 0            |
| cov2_3_9_10  | 19.3546 | -215.48  | 0.4207548 | 0 | 0            | -0.073180253 |
| cov2_3_6_10  | 19.3763 | -215.491 | 0.4194726 | 0 | 0            | -0.03715567  |
| cov2_8_9_10  | 19.4462 | -215.526 | 0.4190864 | 0 | 0            | -0.070846924 |
| cov2_7_9_10  | 19.4485 | -215.527 | 0.419083  | 0 | 0            | -0.07082235  |
| cov2_6_7_10  | 19.453  | -215.53  | 0.4178663 | 0 | 0            | -0.035035543 |
| cov2_6_8_10  | 19.4589 | -215.532 | 0.417866  | 0 | 0            | -0.035262173 |
| cov1_2_3_10  | 19.4812 | -215.544 | 0.4187756 | 0 | -0.048852576 | -0.030977176 |
| cov2_6_9_10  | 19.4862 | -215.546 | 0.4181754 | 0 | 0            | -0.035196957 |
| cov2_5_8_10  | 19.5439 | -215.575 | 0.4175897 | 0 | 0            | -0.036190203 |
| cov2_5_7_10  | 19.5468 | -215.576 | 0.4175864 | 0 | 0            | -0.036194171 |
| cov5_6_7_10  | 19.5519 | -215.579 | 0.4166942 | 0 | 0            | 0            |
| cov1_3_6_10  | 19.5525 | -215.579 | 0.4179037 | 0 | -0.044827908 | 0            |
| cov5_6_8_10  | 19.5568 | -215.581 | 0.4166874 | 0 | 0            | 0            |
| cov5_6_9_10  | 19.5645 | -215.585 | 0.4169983 | 0 | 0            | 0            |
| cov1_2_9_10  | 19.5766 | -215.591 | 0.4173877 | 0 | -0.056217782 | -0.027011354 |
| cov1_6_9_10  | 19.5794 | -215.593 | 0.4167632 | 0 | -0.047740805 | 0            |
| cov1_2_8_10  | 19.5965 | -215.601 | 0.417204  | 0 | -0.046726229 | -0.030446747 |
| cov1_2_7_10  | 19.5995 | -215.603 | 0.4172011 | 0 | -0.04667604  | -0.030464178 |
| cov3_7_8     | 19.6198 | -219.135 | 0.4165167 | 0 | 0            | 0            |
| cov4_6_9_10  | 19.6198 | -215.613 | 0.4185268 | 0 | 0            | 0            |
| cov1_3_8_10  | 19.6231 | -215.615 | 0.4171241 | 0 | -0.073994785 | 0            |
| cov1_3_7_10  | 19.6262 | -215.616 | 0.4171259 | 0 | -0.073989316 | 0            |
| cov1_4_9_10  | 19.628  | -215.617 | 0.4175906 | 0 | -0.063900048 | 0            |
| cov2_5_9_10  | 19.628  | -215.617 | 0.4178317 | 0 | 0            | -0.037116561 |
| cov1_6_7_10  | 19.6382 | -215.622 | 0.4164362 | 0 | -0.039865483 | 0            |
| cov1_6_8_10  | 19.6417 | -215.624 | 0.4164275 | 0 | -0.040532189 | 0            |
| cov1_9_10_11 | 19.6524 | -215.629 | 0.4173048 | 0 | -0.092304718 | 0            |
| cov1_5_9_10  | 19.6617 | -215.634 | 0.4165074 | 0 | -0.055519959 | 0            |
| cov3_5_9_10  | 19.688  | -215.647 | 0.4176216 | 0 | 0            | 0            |
| cov4_6_7_10  | 19.6914 | -215.649 | 0.417764  | 0 | 0            | 0            |
| cov1_3_10_11 | 19.6918 | -215.649 | 0.417849  | 0 | -0.080869125 | 0            |
| cov1_5_8_10  | 19.6949 | -215.65  | 0.4162176 | 0 | -0.044737172 | 0            |
| cov1_5_7_10  | 19.6982 | -215.652 | 0.4162151 | 0 | -0.0447077   | 0            |
| cov4_6_8_10  | 19.6984 | -215.652 | 0.417766  | 0 | 0            | 0            |
| cov3_6_7_10  | 19.7019 | -215.654 | 0.4174888 | 0 | 0            | 0            |
| cov1_3_4_10  | 19.7059 | -215.656 | 0.4176893 | 0 | -0.071841986 | 0            |
| cov3_6_8_10  | 19.7066 | -215.656 | 0.417498  | 0 | 0            | 0            |
| cov1_3_5_10  | 19.7091 | -215.658 | 0.4174998 | 0 | -0.078301134 | 0            |
| cov3_5_6_10  | 19.7327 | -215.669 | 0.4178287 | 0 | 0            | 0            |
| cov1_4_8_10  | 19.745  | -215.676 | 0.4169176 | 0 | -0.060726163 | 0            |
| cov1_4_7_10  | 19.7486 | -215.677 | 0.4169122 | 0 | -0.06071185  | 0            |

|              |         |          |           |   |              |   |              |
|--------------|---------|----------|-----------|---|--------------|---|--------------|
| cov2_3_5_10  | 19.7515 | -215.679 | 0.4189514 | 0 | 0            | 0 | -0.046814247 |
| cov3_4_6_10  | 19.7623 | -215.684 | 0.4186271 | 0 | 0            | 0 | 0            |
| cov2_6_7_9   | 19.8045 | -215.705 | 0.4186718 | 0 | 0            | 0 | -0.036119987 |
| cov1_8_10_11 | 19.8098 | -215.708 | 0.4162543 | 0 | -0.076554637 | 0 | 0            |
| cov2_6_8_9   | 19.8103 | -215.708 | 0.4186712 | 0 | 0            | 0 | -0.036351214 |
| cov1_7_10_11 | 19.8133 | -215.71  | 0.4162473 | 0 | -0.076469215 | 0 | 0            |
| cov1_7_8_10  | 19.8181 | -215.712 | 0.415989  | 0 | -0.072460816 | 0 | 0            |
| cov3_6_10_11 | 19.8295 | -215.718 | 0.4178281 | 0 | 0            | 0 | 0            |
| cov6_7_10_11 | 19.8529 | -215.729 | 0.4162976 | 0 | 0            | 0 | 0            |
| cov6_7_8_10  | 19.8566 | -215.731 | 0.4164838 | 0 | 0            | 0 | 0            |
| cov6_8_10_11 | 19.864  | -215.735 | 0.4162837 | 0 | 0            | 0 | 0            |
| cov2_3_6_9   | 19.8746 | -215.74  | 0.420106  | 0 | 0            | 0 | -0.038248728 |
| cov6_9_10_11 | 19.8801 | -215.743 | 0.4171443 | 0 | 0            | 0 | 0            |
| cov2_3_8_10  | 19.906  | -215.756 | 0.4191069 | 0 | 0            | 0 | -0.068974632 |
| cov2_3_7_10  | 19.9087 | -215.757 | 0.4191057 | 0 | 0            | 0 | -0.068966597 |
| cov5_8_10_11 | 19.9268 | -215.766 | 0.4156495 | 0 | 0            | 0 | 0            |
| cov5_7_10_11 | 19.9294 | -215.768 | 0.4156431 | 0 | 0            | 0 | 0            |
| cov3_5_8_10  | 19.9528 | -215.779 | 0.4159507 | 0 | 0            | 0 | 0            |
| cov5_7_8_10  | 19.9549 | -215.78  | 0.4160544 | 0 | 0            | 0 | 0            |
| cov4_5_8_10  | 19.9552 | -215.781 | 0.4160541 | 0 | 0            | 0 | 0            |
| cov3_5_7_10  | 19.9556 | -215.781 | 0.4159423 | 0 | 0            | 0 | 0            |
| cov4_5_7_10  | 19.9582 | -215.782 | 0.4160481 | 0 | 0            | 0 | 0            |
| cov2_3_10_11 | 19.9732 | -215.79  | 0.4189181 | 0 | 0            | 0 | -0.063233825 |
| cov1_2_8_9   | 19.9757 | -215.791 | 0.4179531 | 0 | -0.048949818 | 0 | -0.031679491 |
| cov1_2_7_9   | 19.9796 | -215.793 | 0.4179492 | 0 | -0.048896266 | 0 | -0.03169794  |
| cov1_2_3_9   | 20.006  | -215.806 | 0.4193593 | 0 | -0.050933177 | 0 | -0.032248347 |
| cov1_6_7_9   | 20.0065 | -215.806 | 0.4172378 | 0 | -0.040676084 | 0 | 0            |
| cov1_6_8_9   | 20.0099 | -215.808 | 0.4172288 | 0 | -0.04135771  | 0 | 0            |
| cov2_3_4_10  | 20.0161 | -215.811 | 0.4195023 | 0 | 0            | 0 | -0.072832668 |
| cov2_8_10_11 | 20.0268 | -215.816 | 0.4171495 | 0 | 0            | 0 | -0.05976238  |
| cov2_7_10_11 | 20.0283 | -215.817 | 0.4171425 | 0 | 0            | 0 | -0.059701264 |
| cov5_6_7_9   | 20.0382 | -215.822 | 0.4174424 | 0 | 0            | 0 | 0            |
| cov4_5_9_10  | 20.0393 | -215.823 | 0.4168598 | 0 | 0            | 0 | 0            |
| cov5_6_8_9   | 20.0443 | -215.825 | 0.4174337 | 0 | 0            | 0 | 0            |
| cov2_4_8_10  | 20.0523 | -215.829 | 0.4183346 | 0 | 0            | 0 | -0.05767318  |
| cov2_4_7_10  | 20.0547 | -215.83  | 0.4183294 | 0 | 0            | 0 | -0.057701218 |
| cov5_9_10_11 | 20.0605 | -215.833 | 0.4162436 | 0 | 0            | 0 | 0            |
| cov1_3_6_9   | 20.0691 | -215.838 | 0.4185343 | 0 | -0.045577682 | 0 | 0            |
| cov2_4_6_7   | 20.0706 | -215.838 | 0.4201539 | 0 | 0            | 0 | -0.049453539 |
| cov2_5_8_9   | 20.0734 | -215.84  | 0.4183655 | 0 | 0            | 0 | -0.042465504 |
| cov2_5_7_9   | 20.077  | -215.842 | 0.4183611 | 0 | 0            | 0 | -0.04247002  |
| cov2_4_6_8   | 20.078  | -215.842 | 0.420164  | 0 | 0            | 0 | -0.049575856 |
| cov2_7_8_10  | 20.087  | -215.847 | 0.41795   | 0 | 0            | 0 | -0.067613768 |
| cov1_3_8_9   | 20.1035 | -215.855 | 0.4175859 | 0 | -0.076927763 | 0 | 0            |
| cov1_3_7_9   | 20.1076 | -215.857 | 0.4175852 | 0 | -0.076912916 | 0 | 0            |
| cov1_2_6_7   | 20.1131 | -215.86  | 0.4208113 | 0 | -0.017991294 | 0 | -0.032099512 |
| cov4_6_7_9   | 20.1146 | -215.86  | 0.4183486 | 0 | 0            | 0 | 0            |

|              |         |          |           |   |              |   |              |
|--------------|---------|----------|-----------|---|--------------|---|--------------|
| cov1_2_6_8   | 20.1161 | -215.861 | 0.4207971 | 0 | -0.018722128 | 0 | -0.032090192 |
| cov4_6_8_9   | 20.1223 | -215.864 | 0.4183546 | 0 | 0            | 0 | 0            |
| cov2_6_7_11  | 20.1268 | -215.866 | 0.4215705 | 0 | 0            | 0 | -0.040360048 |
| cov2_3_6_7   | 20.1319 | -215.869 | 0.4215832 | 0 | 0            | 0 | -0.038707441 |
| cov2_6_8_11  | 20.1326 | -215.869 | 0.4215685 | 0 | 0            | 0 | -0.040589655 |
| cov2_3_6_8   | 20.1362 | -215.871 | 0.4216053 | 0 | 0            | 0 | -0.038944811 |
| cov2_5_6_7   | 20.144  | -215.875 | 0.4210582 | 0 | 0            | 0 | -0.038974361 |
| cov2_6_7_8   | 20.1454 | -215.876 | 0.4211109 | 0 | 0            | 0 | -0.038244934 |
| cov2_5_6_8   | 20.15   | -215.878 | 0.4210662 | 0 | 0            | 0 | -0.039129129 |
| cov3_6_7_9   | 20.1513 | -215.879 | 0.4180147 | 0 | 0            | 0 | 0            |
| cov2_4_9_10  | 20.1545 | -215.88  | 0.4190223 | 0 | 0            | 0 | -0.052965445 |
| cov3_6_8_9   | 20.1576 | -215.882 | 0.4180244 | 0 | 0            | 0 | 0            |
| cov2_5_6_10  | 20.1623 | -215.884 | 0.4167915 | 0 | 0            | 0 | -0.027715606 |
| cov2_6_10_11 | 20.1648 | -215.885 | 0.418216  | 0 | 0            | 0 | -0.040640964 |
| cov1_4_8_9   | 20.1752 | -215.891 | 0.4174022 | 0 | -0.066984847 | 0 | 0            |
| cov1_5_8_9   | 20.1759 | -215.891 | 0.4168482 | 0 | -0.060017934 | 0 | 0            |
| cov1_4_7_9   | 20.1796 | -215.893 | 0.4173964 | 0 | -0.0669643   | 0 | 0            |
| cov1_5_7_9   | 20.1801 | -215.893 | 0.4168435 | 0 | -0.059987995 | 0 | 0            |
| cov1_8_9_11  | 20.2052 | -215.906 | 0.4170169 | 0 | -0.080375669 | 0 | 0            |
| cov1_7_9_11  | 20.2096 | -215.908 | 0.4170093 | 0 | -0.080293644 | 0 | 0            |
| cov1_7_8_9   | 20.2159 | -215.911 | 0.4167218 | 0 | -0.075790953 | 0 | 0            |
| cov1_3_5_9   | 20.2209 | -215.913 | 0.4181138 | 0 | -0.093992736 | 0 | 0            |
| cov1_3_9_11  | 20.2256 | -215.916 | 0.4184977 | 0 | -0.085500079 | 0 | 0            |
| cov1_2_10_11 | 20.2297 | -215.918 | 0.4175709 | 0 | -0.063218586 | 0 | -0.031204143 |
| cov6_7_9_11  | 20.2311 | -215.919 | 0.417119  | 0 | 0            | 0 | 0            |
| cov1_2_6_10  | 20.2322 | -215.919 | 0.4166594 | 0 | -0.021321816 | 0 | -0.02832671  |
| cov6_7_8_9   | 20.2336 | -215.92  | 0.4172778 | 0 | 0            | 0 | 0            |
| cov6_8_9_11  | 20.2424 | -215.924 | 0.4171045 | 0 | 0            | 0 | 0            |
| cov2_4_6_10  | 20.2494 | -215.928 | 0.4173929 | 0 | 0            | 0 | -0.02808978  |
| cov2_3_4_6   | 20.2517 | -215.929 | 0.4217912 | 0 | 0            | 0 | -0.065852001 |
| cov1_3_4_9   | 20.2543 | -215.93  | 0.4181071 | 0 | -0.077365067 | 0 | 0            |
| cov2_9_10_11 | 20.2688 | -215.937 | 0.4178862 | 0 | 0            | 0 | -0.068327523 |
| cov4_8_9_10  | 20.2776 | -215.942 | 0.4193678 | 0 | 0            | 0 | 0            |
| cov4_7_9_10  | 20.2809 | -215.943 | 0.4193629 | 0 | 0            | 0 | 0            |
| cov1_6_10_11 | 20.2812 | -215.944 | 0.4167304 | 0 | -0.057286331 | 0 | 0            |
| cov1_2_5_10  | 20.289  | -215.948 | 0.4164308 | 0 | -0.027379237 | 0 | -0.027816021 |
| cov5_6_10_11 | 20.2929 | -215.949 | 0.4166937 | 0 | 0            | 0 | 0            |
| cov1_4_6_10  | 20.2983 | -215.952 | 0.4168234 | 0 | -0.030729395 | 0 | 0            |
| cov2_5_10_11 | 20.303  | -215.954 | 0.4175776 | 0 | 0            | 0 | -0.040647192 |
| cov3_4_6_9   | 20.3085 | -215.957 | 0.4191213 | 0 | 0            | 0 | 0            |
| cov3_5_6_9   | 20.3116 | -215.959 | 0.4184751 | 0 | 0            | 0 | 0            |
| cov1_2_4_8   | 20.3135 | -215.96  | 0.4194762 | 0 | -0.061566576 | 0 | -0.043988436 |
| cov1_2_4_7   | 20.3192 | -215.963 | 0.419475  | 0 | -0.061554097 | 0 | -0.044062484 |
| cov1_4_10_11 | 20.3222 | -215.964 | 0.4175226 | 0 | -0.071338517 | 0 | 0            |
| cov1_6_7_11  | 20.3326 | -215.969 | 0.420111  | 0 | -0.050249523 | 0 | 0            |
| cov2_4_5_10  | 20.3338 | -215.97  | 0.416122  | 0 | 0            | 0 | -0.042064525 |
| cov1_6_8_11  | 20.3349 | -215.97  | 0.420106  | 0 | -0.050978903 | 0 | 0            |

|              |         |          |           |   |              |   |              |
|--------------|---------|----------|-----------|---|--------------|---|--------------|
| cov1_5_6_10  | 20.3379 | -215.972 | 0.415699  | 0 | -0.022461531 | 0 | 0            |
| cov4_5_6_10  | 20.3389 | -215.972 | 0.4166265 | 0 | 0            | 0 | 0            |
| cov1_5_6_7   | 20.3409 | -215.973 | 0.4192989 | 0 | -0.052611846 | 0 | 0            |
| cov1_2_4_10  | 20.344  | -215.975 | 0.4167519 | 0 | -0.046280964 | 0 | -0.022302289 |
| cov1_5_6_8   | 20.344  | -215.975 | 0.4192889 | 0 | -0.053277555 | 0 | 0            |
| cov1_3_6_7   | 20.3476 | -215.977 | 0.420079  | 0 | -0.044922358 | 0 | 0            |
| cov1_3_6_8   | 20.3494 | -215.978 | 0.4200868 | 0 | -0.045586131 | 0 | 0            |
| cov3_6_9_11  | 20.3563 | -215.981 | 0.4185275 | 0 | 0            | 0 | 0            |
| cov4_6_10_11 | 20.357  | -215.982 | 0.4181248 | 0 | 0            | 0 | 0            |
| cov1_6_7_8   | 20.359  | -215.983 | 0.4196548 | 0 | -0.044312225 | 0 | 0            |
| cov1_4_6_7   | 20.3595 | -215.983 | 0.4196531 | 0 | -0.044157245 | 0 | 0            |
| cov1_4_6_8   | 20.3624 | -215.984 | 0.4196487 | 0 | -0.044809112 | 0 | 0            |
| cov1_5_10_11 | 20.3639 | -215.985 | 0.4163797 | 0 | -0.063018858 | 0 | 0            |
| cov1_2_5_8   | 20.3664 | -215.986 | 0.4200855 | 0 | -0.067970481 | 0 | -0.033689595 |
| cov1_2_8_11  | 20.3671 | -215.987 | 0.4209619 | 0 | -0.064707513 | 0 | -0.034183765 |
| cov3_5_10_11 | 20.3719 | -215.989 | 0.4161829 | 0 | 0            | 0 | 0            |
| cov1_2_5_7   | 20.3724 | -215.989 | 0.4200856 | 0 | -0.068010507 | 0 | -0.033714704 |
| cov1_2_7_11  | 20.3737 | -215.99  | 0.4209619 | 0 | -0.064657473 | 0 | -0.034200862 |
| cov1_2_3_8   | 20.3785 | -215.992 | 0.4209469 | 0 | -0.059225412 | 0 | -0.033614426 |
| cov1_2_3_7   | 20.385  | -215.996 | 0.4209481 | 0 | -0.059206476 | 0 | -0.033633171 |
| cov2_3_5_9   | 20.3852 | -215.996 | 0.4195735 | 0 | 0            | 0 | -0.052741955 |
| cov1_2_7_8   | 20.3923 | -215.999 | 0.4204846 | 0 | -0.058433912 | 0 | -0.033340923 |
| cov3_4_5_10  | 20.3982 | -216.002 | 0.4168273 | 0 | 0            | 0 | 0            |
| cov2_3_5_6   | 20.4016 | -216.004 | 0.4230178 | 0 | 0            | 0 | -0.048859672 |
| cov2_3_8_9   | 20.4036 | -216.005 | 0.4194981 | 0 | 0            | 0 | -0.071333674 |
| cov1_2_3_5   | 20.4043 | -216.005 | 0.4215671 | 0 | -0.10290427  | 0 | -0.036192989 |
| cov2_3_7_9   | 20.4069 | -216.006 | 0.4194945 | 0 | 0            | 0 | -0.071319063 |
| cov1_3_5_6   | 20.4153 | -216.011 | 0.420628  | 0 | -0.089296204 | 0 | 0            |
| cov1_4_5_10  | 20.4197 | -216.013 | 0.4163229 | 0 | -0.050640825 | 0 | 0            |
| cov2_8_9_11  | 20.4474 | -216.027 | 0.4178345 | 0 | 0            | 0 | -0.062431009 |
| cov2_7_9_11  | 20.4496 | -216.028 | 0.4178272 | 0 | 0            | 0 | -0.062371612 |
| cov1_2_3_4   | 20.46   | -216.033 | 0.4209125 | 0 | -0.071413751 | 0 | -0.057573103 |
| cov2_3_6_11  | 20.4739 | -216.04  | 0.4237395 | 0 | 0            | 0 | -0.044491006 |
| cov1_2_3_6   | 20.4764 | -216.041 | 0.4226288 | 0 | -0.023857315 | 0 | -0.032761618 |
| cov2_4_8_9   | 20.4973 | -216.052 | 0.418839  | 0 | 0            | 0 | -0.064542066 |
| cov2_4_7_9   | 20.5002 | -216.053 | 0.4188325 | 0 | 0            | 0 | -0.064569101 |
| cov2_7_8_9   | 20.5087 | -216.057 | 0.4186157 | 0 | 0            | 0 | -0.070290498 |
| cov4_8_10_11 | 20.5378 | -216.072 | 0.4165546 | 0 | 0            | 0 | 0            |
| cov2_6_9_11  | 20.5395 | -216.073 | 0.4190304 | 0 | 0            | 0 | -0.042043608 |
| cov4_7_10_11 | 20.5398 | -216.073 | 0.4165459 | 0 | 0            | 0 | 0            |
| cov2_3_9_11  | 20.5462 | -216.076 | 0.4194935 | 0 | 0            | 0 | -0.066448977 |
| cov3_4_9_10  | 20.5593 | -216.083 | 0.4199359 | 0 | 0            | 0 | 0            |
| cov2_3_4_9   | 20.5718 | -216.089 | 0.4199261 | 0 | 0            | 0 | -0.078908743 |
| cov1_3_5_8   | 20.5754 | -216.091 | 0.4196337 | 0 | -0.11149972  | 0 | 0            |
| cov1_3_5_7   | 20.5812 | -216.094 | 0.4196392 | 0 | -0.11174383  | 0 | 0            |
| cov4_5_6_7   | 20.5841 | -216.095 | 0.4205638 | 0 | 0            | 0 | 0            |
| cov3_5_6_7   | 20.5892 | -216.098 | 0.4201574 | 0 | 0            | 0 | 0            |

|              |         |          |           |   |              |   |              |
|--------------|---------|----------|-----------|---|--------------|---|--------------|
| cov4_6_7_11  | 20.5895 | -216.098 | 0.42059   | 0 | 0            | 0 | 0            |
| cov4_6_7_8   | 20.5897 | -216.098 | 0.4206742 | 0 | 0            | 0 | 0            |
| cov5_8_9_11  | 20.5897 | -216.098 | 0.4160219 | 0 | 0            | 0 | 0            |
| cov5_6_7_8   | 20.5899 | -216.098 | 0.4202662 | 0 | 0            | 0 | 0            |
| cov5_6_7_11  | 20.59   | -216.098 | 0.4202227 | 0 | 0            | 0 | 0            |
| cov3_4_6_7   | 20.5901 | -216.098 | 0.4206632 | 0 | 0            | 0 | 0            |
| cov5_7_9_11  | 20.5929 | -216.099 | 0.4160151 | 0 | 0            | 0 | 0            |
| cov4_5_6_8   | 20.5935 | -216.1   | 0.4205705 | 0 | 0            | 0 | 0            |
| cov2_4_5_8   | 20.5985 | -216.102 | 0.4201278 | 0 | 0            | 0 | -0.080787949 |
| cov3_5_6_8   | 20.5993 | -216.103 | 0.4201789 | 0 | 0            | 0 | 0            |
| cov4_6_8_11  | 20.5993 | -216.103 | 0.4205999 | 0 | 0            | 0 | 0            |
| cov5_6_8_11  | 20.5998 | -216.103 | 0.4202248 | 0 | 0            | 0 | 0            |
| cov3_4_6_8   | 20.5999 | -216.103 | 0.4206918 | 0 | 0            | 0 | 0            |
| cov2_4_5_7   | 20.6041 | -216.105 | 0.4201254 | 0 | 0            | 0 | -0.080868557 |
| cov1_4_5_8   | 20.6134 | -216.11  | 0.4194803 | 0 | -0.096497774 | 0 | 0            |
| cov3_5_8_9   | 20.6145 | -216.11  | 0.4162107 | 0 | 0            | 0 | 0            |
| cov3_5_7_9   | 20.6174 | -216.112 | 0.4162    | 0 | 0            | 0 | 0            |
| cov1_4_5_7   | 20.6199 | -216.113 | 0.4194794 | 0 | -0.096559295 | 0 | 0            |
| cov2_5_6_9   | 20.6209 | -216.113 | 0.4176175 | 0 | 0            | 0 | -0.03182026  |
| cov3_6_7_11  | 20.6211 | -216.114 | 0.4199943 | 0 | 0            | 0 | 0            |
| cov1_2_6_9   | 20.6214 | -216.114 | 0.4174221 | 0 | -0.021244211 | 0 | -0.029479737 |
| cov3_6_7_8   | 20.6239 | -216.115 | 0.420148  | 0 | 0            | 0 | 0            |
| cov1_5_8_11  | 20.624  | -216.115 | 0.419261  | 0 | -0.10109107  | 0 | 0            |
| cov6_7_8_11  | 20.6247 | -216.115 | 0.4197453 | 0 | 0            | 0 | 0            |
| cov1_2_9_11  | 20.6297 | -216.118 | 0.4183279 | 0 | -0.066086701 | 0 | -0.032534445 |
| cov1_5_7_11  | 20.6306 | -216.118 | 0.4192575 | 0 | -0.10112115  | 0 | 0            |
| cov3_6_8_11  | 20.6317 | -216.119 | 0.4200146 | 0 | 0            | 0 | 0            |
| cov1_3_8_11  | 20.6355 | -216.121 | 0.4200057 | 0 | -0.092935577 | 0 | 0            |
| cov1_5_7_8   | 20.6379 | -216.122 | 0.4189387 | 0 | -0.09579546  | 0 | 0            |
| cov1_3_7_11  | 20.6424 | -216.124 | 0.4200069 | 0 | -0.092920539 | 0 | 0            |
| cov4_5_8_9   | 20.6433 | -216.125 | 0.4166512 | 0 | 0            | 0 | 0            |
| cov5_7_8_9   | 20.6436 | -216.125 | 0.4165627 | 0 | 0            | 0 | 0            |
| cov1_4_8_11  | 20.6446 | -216.125 | 0.4197278 | 0 | -0.091332227 | 0 | 0            |
| cov1_7_8_11  | 20.645  | -216.126 | 0.4196328 | 0 | -0.092149003 | 0 | 0            |
| cov4_5_7_9   | 20.6471 | -216.127 | 0.4166444 | 0 | 0            | 0 | 0            |
| cov1_3_4_8   | 20.6482 | -216.127 | 0.4196203 | 0 | -0.088969473 | 0 | 0            |
| cov1_3_7_8   | 20.6486 | -216.127 | 0.4196945 | 0 | -0.087912317 | 0 | 0            |
| cov1_3_6_11  | 20.6487 | -216.127 | 0.4220585 | 0 | -0.060464603 | 0 | 0            |
| cov1_4_7_11  | 20.6515 | -216.129 | 0.4197245 | 0 | -0.091325448 | 0 | 0            |
| cov1_3_4_7   | 20.655  | -216.131 | 0.4196197 | 0 | -0.088998378 | 0 | 0            |
| cov1_4_7_8   | 20.6581 | -216.132 | 0.4193949 | 0 | -0.086296686 | 0 | 0            |
| cov2_4_6_9   | 20.6604 | -216.133 | 0.4179209 | 0 | 0            | 0 | -0.033205287 |
| cov1_3_4_5   | 20.6683 | -216.137 | 0.4209663 | 0 | -0.13122426  | 0 | 0            |
| cov4_9_10_11 | 20.6703 | -216.138 | 0.417798  | 0 | 0            | 0 | 0            |
| cov1_6_9_11  | 20.6709 | -216.138 | 0.4175357 | 0 | -0.058842096 | 0 | 0            |
| cov1_2_3_11  | 20.6754 | -216.141 | 0.4229671 | 0 | -0.074149829 | 0 | -0.035422002 |
| cov1_3_5_11  | 20.6829 | -216.144 | 0.4206868 | 0 | -0.13785339  | 0 | 0            |

|              |         |          |           |   |              |   |              |
|--------------|---------|----------|-----------|---|--------------|---|--------------|
| cov1_3_4_6   | 20.6985 | -216.152 | 0.4207349 | 0 | -0.05763389  | 0 | 0            |
| cov1_4_6_9   | 20.7477 | -216.177 | 0.4173072 | 0 | -0.034160756 | 0 | 0            |
| cov4_5_10_11 | 20.749  | -216.178 | 0.4160123 | 0 | 0            | 0 | 0            |
| cov1_2_5_9   | 20.7674 | -216.187 | 0.4170705 | 0 | -0.041000278 | 0 | -0.02979532  |
| cov1_2_4_9   | 20.7799 | -216.193 | 0.4172181 | 0 | -0.049947743 | 0 | -0.027188407 |
| cov1_4_9_11  | 20.7872 | -216.197 | 0.4180075 | 0 | -0.078207609 | 0 | 0            |
| cov2_4_10_11 | 20.7974 | -216.202 | 0.4178528 | 0 | 0            | 0 | -0.049838644 |
| cov1_5_6_9   | 20.8102 | -216.208 | 0.4163594 | 0 | -0.03488434  | 0 | 0            |
| cov1_2_6_11  | 20.8168 | -216.211 | 0.421453  | 0 | -0.038281608 | 0 | -0.033362036 |
| cov5_6_9_11  | 20.8265 | -216.216 | 0.4173515 | 0 | 0            | 0 | 0            |
| cov4_6_9_11  | 20.8276 | -216.217 | 0.4186784 | 0 | 0            | 0 | 0            |
| cov3_4_10_11 | 20.8319 | -216.219 | 0.4173181 | 0 | 0            | 0 | 0            |
| cov4_7_8_10  | 20.8487 | -216.227 | 0.4183028 | 0 | 0            | 0 | 0            |
| cov3_4_8_10  | 20.8488 | -216.227 | 0.4183041 | 0 | 0            | 0 | 0            |
| cov3_4_7_10  | 20.8518 | -216.229 | 0.4182976 | 0 | 0            | 0 | 0            |
| cov4_5_6_9   | 20.8553 | -216.231 | 0.4174391 | 0 | 0            | 0 | 0            |
| cov1_5_9_11  | 20.8557 | -216.231 | 0.4170252 | 0 | -0.079182806 | 0 | 0            |
| cov2_5_9_11  | 20.8839 | -216.245 | 0.4182124 | 0 | 0            | 0 | -0.046554873 |
| cov2_4_5_9   | 20.889  | -216.248 | 0.4167422 | 0 | 0            | 0 | -0.049657316 |
| cov7_9_10_11 | 20.8953 | -216.251 | 0.4125677 | 0 | 0            | 0 | 0            |
| cov8_9_10_11 | 20.8974 | -216.252 | 0.4125662 | 0 | 0            | 0 | 0            |
| cov1_4_5_9   | 20.9054 | -216.256 | 0.4170669 | 0 | -0.066265724 | 0 | 0            |
| cov2_3_5_8   | 20.9245 | -216.265 | 0.4216049 | 0 | 0            | 0 | -0.059035867 |
| cov2_5_8_11  | 20.9288 | -216.267 | 0.4217084 | 0 | 0            | 0 | -0.060143816 |
| cov2_3_5_7   | 20.9306 | -216.268 | 0.4215961 | 0 | 0            | 0 | -0.059017497 |
| cov2_4_6_11  | 20.9311 | -216.269 | 0.421179  | 0 | 0            | 0 | -0.050691859 |
| cov2_5_7_11  | 20.9351 | -216.271 | 0.4217062 | 0 | 0            | 0 | -0.060162774 |
| cov2_5_6_11  | 20.9516 | -216.279 | 0.4216831 | 0 | 0            | 0 | -0.044856921 |
| cov1_3_4_11  | 20.9534 | -216.28  | 0.4210307 | 0 | -0.10827564  | 0 | 0            |
| cov2_5_7_8   | 20.9591 | -216.283 | 0.4224019 | 0 | 0            | 0 | -0.063839657 |
| cov1_2_5_6   | 20.992  | -216.299 | 0.4194231 | 0 | -0.037159152 | 0 | -0.031372351 |
| cov1_2_4_6   | 21.0147 | -216.31  | 0.4193369 | 0 | -0.025755523 | 0 | -0.036759286 |
| cov3_9_10_11 | 21.0413 | -216.324 | 0.4140003 | 0 | 0            | 0 | 0            |
| cov1_5_6_11  | 21.0421 | -216.324 | 0.4196207 | 0 | -0.076109686 | 0 | 0            |
| cov3_4_5_6   | 21.0539 | -216.33  | 0.4221668 | 0 | 0            | 0 | 0            |
| cov1_2_5_11  | 21.0601 | -216.333 | 0.4204839 | 0 | -0.090623859 | 0 | -0.034904638 |
| cov2_4_8_11  | 21.0621 | -216.334 | 0.4204311 | 0 | 0            | 0 | -0.078150488 |
| cov2_4_7_11  | 21.0666 | -216.336 | 0.4204246 | 0 | 0            | 0 | -0.078191223 |
| cov1_4_6_11  | 21.0719 | -216.339 | 0.4205624 | 0 | -0.060492664 | 0 | 0            |
| cov3_4_6_11  | 21.0755 | -216.341 | 0.4220604 | 0 | 0            | 0 | 0            |
| cov1_2_4_11  | 21.0786 | -216.342 | 0.4203863 | 0 | -0.079960647 | 0 | -0.041115155 |
| cov2_4_5_6   | 21.0791 | -216.343 | 0.4197894 | 0 | 0            | 0 | -0.044889267 |
| cov3_5_6_11  | 21.0811 | -216.344 | 0.4216386 | 0 | 0            | 0 | 0            |
| cov2_3_8_11  | 21.0817 | -216.344 | 0.4211202 | 0 | 0            | 0 | -0.071848232 |
| cov2_7_8_11  | 21.0835 | -216.345 | 0.4209409 | 0 | 0            | 0 | -0.071559807 |
| cov2_3_7_11  | 21.087  | -216.347 | 0.4211112 | 0 | 0            | 0 | -0.071805789 |
| cov1_4_5_6   | 21.129  | -216.367 | 0.4195405 | 0 | -0.063820577 | 0 | 0            |



|              |         |          |           |   |              |   |              |
|--------------|---------|----------|-----------|---|--------------|---|--------------|
| cov4_8_9_11  | 21.1326 | -216.369 | 0.4169139 | 0 | 0            | 0 | 0            |
| cov4_7_9_11  | 21.1351 | -216.371 | 0.4169049 | 0 | 0            | 0 | 0            |
| cov2_3_4_8   | 21.1644 | -216.385 | 0.4219622 | 0 | 0            | 0 | -0.091478725 |
| cov2_3_4_7   | 21.17   | -216.388 | 0.4219589 | 0 | 0            | 0 | -0.091508131 |
| cov3_5_9_11  | 21.1727 | -216.389 | 0.4164462 | 0 | 0            | 0 | 0            |
| cov2_4_7_8   | 21.1737 | -216.39  | 0.4216764 | 0 | 0            | 0 | -0.088164599 |
| cov2_3_7_8   | 21.189  | -216.398 | 0.422188  | 0 | 0            | 0 | -0.082481248 |
| cov3_4_5_9   | 21.2042 | -216.405 | 0.417297  | 0 | 0            | 0 | 0            |
| cov2_3_4_5   | 21.2306 | -216.418 | 0.4219466 | 0 | 0            | 0 | -0.098472078 |
| cov1_2_4_5   | 21.2389 | -216.422 | 0.4192119 | 0 | -0.076295778 | 0 | -0.031263676 |
| cov1_4_5_11  | 21.2392 | -216.423 | 0.4203714 | 0 | -0.11824755  | 0 | 0            |
| cov2_4_9_11  | 21.3014 | -216.454 | 0.4183101 | 0 | 0            | 0 | -0.056567912 |
| cov3_8_10_11 | 21.3774 | -216.492 | 0.4126267 | 0 | 0            | 0 | 0            |
| cov3_7_10_11 | 21.3782 | -216.492 | 0.4126182 | 0 | 0            | 0 | 0            |
| cov4_5_6_11  | 21.4496 | -216.528 | 0.4212298 | 0 | 0            | 0 | 0            |
| cov4_5_9_11  | 21.4716 | -216.539 | 0.4164551 | 0 | 0            | 0 | 0            |
| cov3_4_8_9   | 21.4822 | -216.544 | 0.4185281 | 0 | 0            | 0 | 0            |
| cov3_4_7_9   | 21.4854 | -216.546 | 0.4185189 | 0 | 0            | 0 | 0            |
| cov4_7_8_9   | 21.4953 | -216.551 | 0.4187325 | 0 | 0            | 0 | 0            |
| cov2_3_4_11  | 21.5202 | -216.563 | 0.4222973 | 0 | 0            | 0 | -0.097891782 |
| cov7_8_10_11 | 21.5219 | -216.564 | 0.4117888 | 0 | 0            | 0 | 0            |
| cov3_4_9_11  | 21.5659 | -216.586 | 0.4176482 | 0 | 0            | 0 | 0            |
| cov2_3_5_11  | 21.6088 | -216.607 | 0.4233623 | 0 | 0            | 0 | -0.073690364 |
| cov2_4_5_11  | 21.79   | -216.698 | 0.420631  | 0 | 0            | 0 | -0.081791464 |
| cov3_5_8_11  | 21.8157 | -216.711 | 0.4183662 | 0 | 0            | 0 | 0            |
| cov3_5_7_11  | 21.8189 | -216.712 | 0.4183473 | 0 | 0            | 0 | 0            |
| cov3_4_5_8   | 21.9684 | -216.787 | 0.4195673 | 0 | 0            | 0 | 0            |
| cov3_5_7_8   | 21.9721 | -216.789 | 0.4192617 | 0 | 0            | 0 | 0            |
| cov3_4_5_7   | 21.9726 | -216.789 | 0.4195467 | 0 | 0            | 0 | 0            |
| cov3_8_9_11  | 22.0069 | -216.806 | 0.4128376 | 0 | 0            | 0 | 0            |
| cov3_7_9_11  | 22.0077 | -216.807 | 0.4128297 | 0 | 0            | 0 | 0            |
| cov7_8_9_11  | 22.0791 | -216.843 | 0.4122371 | 0 | 0            | 0 | 0            |
| cov4_5_8_11  | 22.0904 | -216.848 | 0.4199841 | 0 | 0            | 0 | 0            |
| cov5_7_8_11  | 22.0953 | -216.851 | 0.4197307 | 0 | 0            | 0 | 0            |
| cov4_5_7_11  | 22.0975 | -216.852 | 0.4199826 | 0 | 0            | 0 | 0            |
| cov3_4_8_11  | 22.3411 | -216.974 | 0.4194823 | 0 | 0            | 0 | 0            |
| cov3_4_7_11  | 22.3446 | -216.975 | 0.419463  | 0 | 0            | 0 | 0            |
| cov4_5_7_8   | 22.49   | -217.048 | 0.4222331 | 0 | 0            | 0 | 0            |
| cov4_7_8_11  | 22.4992 | -217.053 | 0.4203895 | 0 | 0            | 0 | 0            |
| cov3_8_9_10  | 22.9903 | -217.298 | 0.4133597 | 0 | 0            | 0 | 0            |
| cov3_7_9_10  | 22.9916 | -217.299 | 0.4133554 | 0 | 0            | 0 | 0            |
| cov3_4_7_8   | 23.0112 | -217.309 | 0.4220534 | 0 | 0            | 0 | 0            |
| cov7_8_9_10  | 23.0655 | -217.336 | 0.412736  | 0 | 0            | 0 | 0            |
| cov3_4_5_11  | 23.2621 | -217.434 | 0.4212967 | 0 | 0            | 0 | 0            |
| cov3_7_8_11  | 23.3308 | -217.468 | 0.4153557 | 0 | 0            | 0 | 0            |
| cov3_7_8_10  | 23.352  | -217.479 | 0.4127174 | 0 | 0            | 0 | 0            |
| cov3_7_8_9   | 24.045  | -217.826 | 0.4127594 | 0 | 0            | 0 | 0            |

|                |         |          |           |   |              |   |              |
|----------------|---------|----------|-----------|---|--------------|---|--------------|
| cov2_3_6_9_10  | 25.5971 | -215.079 | 0.4207881 | 0 | 0            | 0 | -0.03680259  |
| cov1_2_3_9_10  | 25.7    | -215.131 | 0.4199646 | 0 | -0.05612329  | 0 | -0.028904775 |
| cov2_6_7_9_10  | 25.7004 | -215.131 | 0.4191274 | 0 | 0            | 0 | -0.034657882 |
| cov2_6_8_9_10  | 25.7069 | -215.134 | 0.4191259 | 0 | 0            | 0 | -0.034885436 |
| cov1_3_6_9_10  | 25.7189 | -215.14  | 0.4192479 | 0 | -0.048427281 | 0 | 0            |
| cov5_6_7_9_10  | 25.7782 | -215.17  | 0.4179737 | 0 | 0            | 0 | 0            |
| cov5_6_8_9_10  | 25.7834 | -215.172 | 0.4179658 | 0 | 0            | 0 | 0            |
| cov1_3_8_9_10  | 25.8223 | -215.192 | 0.4184334 | 0 | -0.079639796 | 0 | 0            |
| cov1_3_7_9_10  | 25.8256 | -215.193 | 0.4184355 | 0 | -0.079637398 | 0 | 0            |
| cov1_6_7_9_10  | 25.837  | -215.199 | 0.4177213 | 0 | -0.043383741 | 0 | 0            |
| cov1_6_8_9_10  | 25.8404 | -215.201 | 0.417712  | 0 | -0.04405112  | 0 | 0            |
| cov1_2_8_9_10  | 25.8476 | -215.204 | 0.4183363 | 0 | -0.053859212 | 0 | -0.02838089  |
| cov2_5_8_9_10  | 25.8484 | -215.205 | 0.4187633 | 0 | 0            | 0 | -0.036825016 |
| cov1_2_7_9_10  | 25.8512 | -215.206 | 0.418333  | 0 | -0.053807238 | 0 | -0.028398828 |
| cov2_5_7_9_10  | 25.8518 | -215.206 | 0.4187593 | 0 | 0            | 0 | -0.036828886 |
| cov1_3_9_10_11 | 25.8876 | -215.224 | 0.4190596 | 0 | -0.085280985 | 0 | 0            |
| cov1_3_5_9_10  | 25.8951 | -215.228 | 0.4187947 | 0 | -0.086341867 | 0 | 0            |
| cov1_3_4_9_10  | 25.8987 | -215.23  | 0.4188576 | 0 | -0.079261882 | 0 | 0            |
| cov3_6_7_9_10  | 25.9235 | -215.242 | 0.4188372 | 0 | 0            | 0 | 0            |
| cov3_6_8_9_10  | 25.9281 | -215.245 | 0.4188463 | 0 | 0            | 0 | 0            |
| cov1_5_8_9_10  | 25.9296 | -215.245 | 0.4174237 | 0 | -0.051664394 | 0 | 0            |
| cov1_5_7_9_10  | 25.9336 | -215.247 | 0.4174195 | 0 | -0.051633729 | 0 | 0            |
| cov4_6_7_9_10  | 25.9406 | -215.251 | 0.4189893 | 0 | 0            | 0 | 0            |
| cov3_5_6_9_10  | 25.9407 | -215.251 | 0.4191483 | 0 | 0            | 0 | 0            |
| cov4_6_8_9_10  | 25.9481 | -215.255 | 0.4189934 | 0 | 0            | 0 | 0            |
| cov1_4_8_9_10  | 25.9823 | -215.272 | 0.4180273 | 0 | -0.067465295 | 0 | 0            |
| cov3_4_6_9_10  | 25.9841 | -215.273 | 0.4198943 | 0 | 0            | 0 | 0            |
| cov1_4_7_9_10  | 25.9864 | -215.274 | 0.4180221 | 0 | -0.06744562  | 0 | 0            |
| cov1_8_9_10_11 | 26.0355 | -215.298 | 0.4174093 | 0 | -0.080973302 | 0 | 0            |
| cov3_6_9_10_11 | 26.0374 | -215.299 | 0.4190628 | 0 | 0            | 0 | 0            |
| cov1_7_9_10_11 | 26.0395 | -215.3   | 0.4174021 | 0 | -0.080889683 | 0 | 0            |
| cov1_7_8_9_10  | 26.04   | -215.301 | 0.4172131 | 0 | -0.077943946 | 0 | 0            |
| cov2_3_5_9_10  | 26.0634 | -215.312 | 0.4201053 | 0 | 0            | 0 | -0.047427813 |
| cov6_7_9_10_11 | 26.0856 | -215.323 | 0.4174798 | 0 | 0            | 0 | 0            |
| cov6_7_8_9_10  | 26.0952 | -215.328 | 0.4177606 | 0 | 0            | 0 | 0            |
| cov6_8_9_10_11 | 26.0971 | -215.329 | 0.4174657 | 0 | 0            | 0 | 0            |
| cov5_8_9_10_11 | 26.2245 | -215.393 | 0.4166505 | 0 | 0            | 0 | 0            |
| cov5_7_9_10_11 | 26.2275 | -215.394 | 0.416644  | 0 | 0            | 0 | 0            |
| cov3_5_8_9_10  | 26.271  | -215.416 | 0.4170529 | 0 | 0            | 0 | 0            |
| cov4_5_8_9_10  | 26.2734 | -215.417 | 0.4170549 | 0 | 0            | 0 | 0            |
| cov5_7_8_9_10  | 26.2741 | -215.418 | 0.4171746 | 0 | 0            | 0 | 0            |
| cov3_5_7_9_10  | 26.2742 | -215.418 | 0.4170447 | 0 | 0            | 0 | 0            |
| cov4_5_7_9_10  | 26.2769 | -215.419 | 0.4170495 | 0 | 0            | 0 | 0            |
| cov2_3_8_9_10  | 26.2939 | -215.428 | 0.4203161 | 0 | 0            | 0 | -0.07231035  |
| cov2_3_7_9_10  | 26.2968 | -215.429 | 0.4203095 | 0 | 0            | 0 | -0.072290037 |
| cov2_3_6_7_10  | 26.3133 | -215.437 | 0.4190355 | 0 | 0            | 0 | -0.036317816 |
| cov2_3_6_8_10  | 26.3147 | -215.438 | 0.4190449 | 0 | 0            | 0 | -0.0364442   |

|                |         |          |           |   |              |   |              |
|----------------|---------|----------|-----------|---|--------------|---|--------------|
| cov2_3_9_10_11 | 26.3177 | -215.439 | 0.4199048 | 0 | 0            | 0 | -0.064345472 |
| cov2_3_4_6_10  | 26.3561 | -215.459 | 0.4191041 | 0 | 0            | 0 | -0.049817036 |
| cov1_2_3_6_10  | 26.3794 | -215.47  | 0.4191642 | 0 | -0.020406759 | 0 | -0.030215025 |
| cov2_5_6_7_10  | 26.3871 | -215.474 | 0.4176947 | 0 | 0            | 0 | -0.027344547 |
| cov2_5_6_8_10  | 26.3901 | -215.476 | 0.4176934 | 0 | 0            | 0 | -0.027469619 |
| cov2_8_9_10_11 | 26.3907 | -215.476 | 0.4180818 | 0 | 0            | 0 | -0.060820675 |
| cov2_7_9_10_11 | 26.3925 | -215.477 | 0.4180749 | 0 | 0            | 0 | -0.060758975 |
| cov2_3_4_9_10  | 26.3973 | -215.479 | 0.4206962 | 0 | 0            | 0 | -0.075856803 |
| cov2_3_6_10_11 | 26.4002 | -215.481 | 0.419945  | 0 | 0            | 0 | -0.039338011 |
| cov2_5_6_9_10  | 26.4051 | -215.483 | 0.4179825 | 0 | 0            | 0 | -0.026990011 |
| cov2_3_5_6_10  | 26.4197 | -215.49  | 0.4194185 | 0 | 0            | 0 | -0.036186332 |
| cov1_2_3_8_10  | 26.4378 | -215.499 | 0.4184047 | 0 | -0.047795104 | 0 | -0.031027919 |
| cov1_2_3_7_10  | 26.4408 | -215.501 | 0.4184051 | 0 | -0.047783326 | 0 | -0.031033491 |
| cov2_6_9_10_11 | 26.4411 | -215.501 | 0.4192808 | 0 | 0            | 0 | -0.039726379 |
| cov2_4_5_8_10  | 26.4454 | -215.503 | 0.4164167 | 0 | 0            | 0 | -0.048792607 |
| cov2_4_5_7_10  | 26.4477 | -215.504 | 0.4164105 | 0 | 0            | 0 | -0.048827857 |
| cov2_4_8_9_10  | 26.4519 | -215.507 | 0.4194902 | 0 | 0            | 0 | -0.060374946 |
| cov2_4_7_9_10  | 26.4546 | -215.508 | 0.4194845 | 0 | 0            | 0 | -0.06040052  |
| cov1_2_6_9_10  | 26.4607 | -215.511 | 0.4177914 | 0 | -0.026520725 | 0 | -0.02617446  |
| cov1_2_3_4_10  | 26.461  | -215.511 | 0.4183515 | 0 | -0.053527766 | 0 | -0.042636821 |
| cov1_2_6_7_10  | 26.4728 | -215.517 | 0.4176272 | 0 | -0.015835166 | 0 | -0.029658811 |
| cov1_2_6_8_10  | 26.4764 | -215.519 | 0.4176178 | 0 | -0.01651608  | 0 | -0.029651188 |
| cov2_6_7_10_11 | 26.4859 | -215.524 | 0.4182495 | 0 | 0            | 0 | -0.036758199 |
| cov2_7_8_9_10  | 26.4905 | -215.526 | 0.4190865 | 0 | 0            | 0 | -0.070838663 |
| cov2_6_8_10_11 | 26.4918 | -215.526 | 0.4182488 | 0 | 0            | 0 | -0.036975983 |
| cov1_2_3_10_11 | 26.4948 | -215.528 | 0.4192852 | 0 | -0.055650871 | 0 | -0.031918854 |
| cov1_6_9_10_11 | 26.4965 | -215.529 | 0.4178957 | 0 | -0.060068886 | 0 | 0            |
| cov1_2_9_10_11 | 26.4976 | -215.529 | 0.4185705 | 0 | -0.069336696 | 0 | -0.029016891 |
| cov2_4_6_7_10  | 26.4979 | -215.529 | 0.4178827 | 0 | 0            | 0 | -0.034706479 |
| cov2_6_7_8_10  | 26.4979 | -215.53  | 0.4178663 | 0 | 0            | 0 | -0.03503446  |
| cov1_3_6_7_10  | 26.4995 | -215.53  | 0.4175314 | 0 | -0.042419173 | 0 | 0            |
| cov1_3_6_8_10  | 26.4996 | -215.53  | 0.4175331 | 0 | -0.042762721 | 0 | 0            |
| cov2_4_6_8_10  | 26.5037 | -215.532 | 0.4178889 | 0 | 0            | 0 | -0.034798574 |
| cov2_4_6_9_10  | 26.5059 | -215.534 | 0.4185644 | 0 | 0            | 0 | -0.028165987 |
| cov1_2_3_5_10  | 26.5197 | -215.54  | 0.4188157 | 0 | -0.055356653 | 0 | -0.031422789 |
| cov1_4_6_9_10  | 26.5203 | -215.541 | 0.4179207 | 0 | -0.035423353 | 0 | 0            |
| cov1_2_5_8_10  | 26.5386 | -215.55  | 0.41736   | 0 | -0.022540551 | 0 | -0.029057532 |
| cov1_2_5_7_10  | 26.5418 | -215.551 | 0.4173568 | 0 | -0.02249581  | 0 | -0.029075687 |
| cov5_6_9_10_11 | 26.5423 | -215.552 | 0.4178098 | 0 | 0            | 0 | 0            |
| cov1_2_5_9_10  | 26.5478 | -215.554 | 0.4174945 | 0 | -0.035761819 | 0 | -0.025808666 |
| cov1_5_6_9_10  | 26.55   | -215.556 | 0.4169079 | 0 | -0.027508852 | 0 | 0            |
| cov2_3_5_8_10  | 26.559  | -215.56  | 0.4181254 | 0 | 0            | 0 | -0.039608836 |
| cov3_5_6_7_10  | 26.5594 | -215.56  | 0.4172047 | 0 | 0            | 0 | 0            |
| cov2_3_5_7_10  | 26.5623 | -215.562 | 0.4181203 | 0 | 0            | 0 | -0.039603034 |
| cov3_5_6_8_10  | 26.5627 | -215.562 | 0.4172091 | 0 | 0            | 0 | 0            |
| cov1_3_6_10_11 | 26.5657 | -215.563 | 0.4183845 | 0 | -0.051113536 | 0 | 0            |
| cov1_5_6_7_10  | 26.5775 | -215.569 | 0.4166316 | 0 | -0.01571151  | 0 | 0            |

|                |         |          |           |   |              |   |              |
|----------------|---------|----------|-----------|---|--------------|---|--------------|
| cov1_4_9_10_11 | 26.5794 | -215.57  | 0.4185125 | 0 | -0.077044247 | 0 | 0            |
| cov1_5_6_8_10  | 26.5807 | -215.571 | 0.4166228 | 0 | -0.016350418 | 0 | 0            |
| cov4_5_6_9_10  | 26.581  | -215.571 | 0.4177194 | 0 | 0            | 0 | 0            |
| cov2_5_8_10_11 | 26.5882 | -215.575 | 0.4176666 | 0 | 0            | 0 | -0.036594732 |
| cov2_5_7_8_10  | 26.5884 | -215.575 | 0.4175901 | 0 | 0            | 0 | -0.036190729 |
| cov2_3_4_5_10  | 26.5885 | -215.575 | 0.417801  | 0 | 0            | 0 | -0.064650332 |
| cov2_5_7_10_11 | 26.5912 | -215.576 | 0.4176589 | 0 | 0            | 0 | -0.036579152 |
| cov5_6_7_10_11 | 26.5926 | -215.577 | 0.4168843 | 0 | 0            | 0 | 0            |
| cov1_3_5_6_10  | 26.5928 | -215.577 | 0.4179271 | 0 | -0.050295369 | 0 | 0            |
| cov1_3_4_6_10  | 26.596  | -215.579 | 0.4180128 | 0 | -0.043307581 | 0 | 0            |
| cov4_5_6_7_10  | 26.5963 | -215.579 | 0.4167813 | 0 | 0            | 0 | 0            |
| cov5_6_7_8_10  | 26.5968 | -215.579 | 0.416694  | 0 | 0            | 0 | 0            |
| cov5_6_8_10_11 | 26.5974 | -215.579 | 0.4168775 | 0 | 0            | 0 | 0            |
| cov1_2_4_9_10  | 26.5984 | -215.58  | 0.4177888 | 0 | -0.05364706  | 0 | -0.020845631 |
| cov4_5_6_8_10  | 26.6012 | -215.581 | 0.4167792 | 0 | 0            | 0 | 0            |
| cov1_5_9_10_11 | 26.6114 | -215.586 | 0.4174675 | 0 | -0.068915056 | 0 | 0            |
| cov1_2_8_10_11 | 26.624  | -215.593 | 0.4176172 | 0 | -0.051984499 | 0 | -0.031159254 |
| cov1_4_6_7_10  | 26.6263 | -215.594 | 0.4172541 | 0 | -0.030876844 | 0 | 0            |
| cov1_2_7_10_11 | 26.6274 | -215.594 | 0.4176103 | 0 | -0.051894533 | 0 | -0.031164779 |
| cov2_4_5_9_10  | 26.6279 | -215.595 | 0.4170971 | 0 | 0            | 0 | -0.044019788 |
| cov4_6_9_10_11 | 26.629  | -215.595 | 0.4191699 | 0 | 0            | 0 | 0            |
| cov1_4_6_8_10  | 26.6291 | -215.595 | 0.4172509 | 0 | -0.03146164  | 0 | 0            |
| cov2_5_9_10_11 | 26.6351 | -215.598 | 0.4185119 | 0 | 0            | 0 | -0.040410943 |
| cov1_2_4_8_10  | 26.641  | -215.601 | 0.4172503 | 0 | -0.046398758 | 0 | -0.029629267 |
| cov1_2_7_8_10  | 26.6411 | -215.601 | 0.4172043 | 0 | -0.046712202 | 0 | -0.030452226 |
| cov1_2_4_7_10  | 26.6441 | -215.603 | 0.4172459 | 0 | -0.046362224 | 0 | -0.02967682  |
| cov1_3_4_8_10  | 26.6534 | -215.607 | 0.4174533 | 0 | -0.068227269 | 0 | 0            |
| cov3_4_6_7_10  | 26.6541 | -215.608 | 0.4182602 | 0 | 0            | 0 | 0            |
| cov1_3_5_8_10  | 26.6544 | -215.608 | 0.4170091 | 0 | -0.06242597  | 0 | 0            |
| cov1_3_4_7_10  | 26.6567 | -215.609 | 0.4174526 | 0 | -0.06824725  | 0 | 0            |
| cov1_3_5_7_10  | 26.6579 | -215.61  | 0.4170093 | 0 | -0.062524852 | 0 | 0            |
| cov3_4_6_8_10  | 26.6579 | -215.61  | 0.4182722 | 0 | 0            | 0 | 0            |
| cov1_3_8_10_11 | 26.6612 | -215.611 | 0.4173613 | 0 | -0.077636564 | 0 | 0            |
| cov1_4_5_9_10  | 26.6632 | -215.612 | 0.4173751 | 0 | -0.057323419 | 0 | 0            |
| cov1_3_7_10_11 | 26.6643 | -215.613 | 0.417364  | 0 | -0.077645554 | 0 | 0            |
| cov1_6_7_10_11 | 26.666  | -215.614 | 0.4168204 | 0 | -0.044773792 | 0 | 0            |
| cov1_3_7_8_10  | 26.6672 | -215.614 | 0.4171306 | 0 | -0.074018902 | 0 | 0            |
| cov1_6_8_10_11 | 26.669  | -215.615 | 0.4168177 | 0 | -0.045472591 | 0 | 0            |
| cov3_5_9_10_11 | 26.6788 | -215.62  | 0.4171687 | 0 | 0            | 0 | 0            |
| cov1_6_7_8_10  | 26.6829 | -215.622 | 0.4164356 | 0 | -0.039981254 | 0 | 0            |
| cov3_4_5_9_10  | 26.7309 | -215.646 | 0.4177956 | 0 | 0            | 0 | 0            |
| cov1_3_4_10_11 | 26.731  | -215.646 | 0.4180823 | 0 | -0.077525513 | 0 | 0            |
| cov1_5_8_10_11 | 26.7332 | -215.647 | 0.4164524 | 0 | -0.048537615 | 0 | 0            |
| cov1_3_5_10_11 | 26.7359 | -215.649 | 0.4178513 | 0 | -0.083256164 | 0 | 0            |
| cov4_6_7_8_10  | 26.7361 | -215.649 | 0.4177625 | 0 | 0            | 0 | 0            |
| cov4_6_7_10_11 | 26.7363 | -215.649 | 0.4177626 | 0 | 0            | 0 | 0            |
| cov1_4_5_8_10  | 26.7365 | -215.649 | 0.4164444 | 0 | -0.045307199 | 0 | 0            |

|                |         |          |           |   |              |   |              |
|----------------|---------|----------|-----------|---|--------------|---|--------------|
| cov1_5_7_10_11 | 26.7368 | -215.649 | 0.4164451 | 0 | -0.048452648 | 0 | 0            |
| cov3_6_7_10_11 | 26.739  | -215.65  | 0.4172595 | 0 | 0            | 0 | 0            |
| cov1_5_7_8_10  | 26.7396 | -215.65  | 0.4162178 | 0 | -0.04472699  | 0 | 0            |
| cov1_4_5_7_10  | 26.7399 | -215.651 | 0.416439  | 0 | -0.04527296  | 0 | 0            |
| cov1_3_4_5_10  | 26.7417 | -215.651 | 0.4179215 | 0 | -0.078763426 | 0 | 0            |
| cov2_3_6_7_9   | 26.743  | -215.652 | 0.4195613 | 0 | 0            | 0 | -0.037135233 |
| cov4_6_8_10_11 | 26.7433 | -215.652 | 0.4177671 | 0 | 0            | 0 | 0            |
| cov3_6_8_10_11 | 26.7436 | -215.652 | 0.417267  | 0 | 0            | 0 | 0            |
| cov2_3_6_8_9   | 26.7451 | -215.653 | 0.4195727 | 0 | 0            | 0 | -0.03729605  |
| cov3_6_7_8_10  | 26.7457 | -215.653 | 0.4174903 | 0 | 0            | 0 | 0            |
| cov3_4_5_6_10  | 26.773  | -215.667 | 0.4180944 | 0 | 0            | 0 | 0            |
| cov3_5_6_10_11 | 26.7738 | -215.667 | 0.4179832 | 0 | 0            | 0 | 0            |
| cov1_4_8_10_11 | 26.7808 | -215.671 | 0.4172012 | 0 | -0.064911744 | 0 | 0            |
| cov1_4_7_10_11 | 26.7845 | -215.673 | 0.4171909 | 0 | -0.064848749 | 0 | 0            |
| cov1_4_7_8_10  | 26.7898 | -215.675 | 0.416917  | 0 | -0.060726966 | 0 | 0            |
| cov2_3_5_10_11 | 26.7963 | -215.679 | 0.4189665 | 0 | 0            | 0 | -0.046888588 |
| cov2_5_6_7_9   | 26.8059 | -215.684 | 0.4185671 | 0 | 0            | 0 | -0.031370102 |
| cov3_4_6_10_11 | 26.807  | -215.684 | 0.4186772 | 0 | 0            | 0 | 0            |
| cov2_5_6_8_9   | 26.8097 | -215.685 | 0.4185653 | 0 | 0            | 0 | -0.031499156 |
| cov2_3_4_6_9   | 26.8105 | -215.686 | 0.4196426 | 0 | 0            | 0 | -0.054612323 |
| cov1_2_6_7_9   | 26.8247 | -215.693 | 0.4184421 | 0 | -0.015710938 | 0 | -0.030792785 |
| cov1_2_6_8_9   | 26.8282 | -215.695 | 0.418432  | 0 | -0.016409447 | 0 | -0.030783605 |
| cov2_6_7_9_11  | 26.8339 | -215.698 | 0.4191014 | 0 | 0            | 0 | -0.038071065 |
| cov2_6_8_9_11  | 26.8397 | -215.7   | 0.4191002 | 0 | 0            | 0 | -0.038291757 |
| cov2_4_6_7_9   | 26.842  | -215.702 | 0.4184841 | 0 | 0            | 0 | -0.03996826  |
| cov2_4_6_8_9   | 26.8483 | -215.705 | 0.4184901 | 0 | 0            | 0 | -0.04006396  |
| cov2_6_7_8_9   | 26.8494 | -215.705 | 0.4186719 | 0 | 0            | 0 | -0.036126359 |
| cov1_7_8_10_11 | 26.8546 | -215.708 | 0.4162532 | 0 | -0.076530891 | 0 | 0            |
| cov1_2_3_6_9   | 26.8786 | -215.72  | 0.4198102 | 0 | -0.020189545 | 0 | -0.031389327 |
| cov2_3_8_10_11 | 26.8822 | -215.722 | 0.4182695 | 0 | 0            | 0 | -0.060633616 |
| cov2_3_7_10_11 | 26.8849 | -215.723 | 0.4182625 | 0 | 0            | 0 | -0.060626113 |
| cov2_3_6_9_11  | 26.8867 | -215.724 | 0.4206883 | 0 | 0            | 0 | -0.040960391 |
| cov6_7_8_10_11 | 26.8968 | -215.729 | 0.4163024 | 0 | 0            | 0 | 0            |
| cov1_2_3_8_9   | 26.9    | -215.731 | 0.4188817 | 0 | -0.049660033 | 0 | -0.032224471 |
| cov1_2_3_7_9   | 26.904  | -215.733 | 0.4188809 | 0 | -0.04963634  | 0 | -0.032234337 |
| cov2_3_5_6_9   | 26.9133 | -215.737 | 0.4202173 | 0 | 0            | 0 | -0.040197665 |
| cov4_8_9_10_11 | 26.9187 | -215.74  | 0.4174411 | 0 | 0            | 0 | 0            |
| cov4_7_9_10_11 | 26.921  | -215.741 | 0.417432  | 0 | 0            | 0 | 0            |
| cov2_4_5_8_9   | 26.94   | -215.751 | 0.4170886 | 0 | 0            | 0 | -0.056552869 |
| cov2_4_5_7_9   | 26.943  | -215.752 | 0.4170824 | 0 | 0            | 0 | -0.056585872 |
| cov1_2_3_4_9   | 26.9431 | -215.752 | 0.4188305 | 0 | -0.05708987  | 0 | -0.047182394 |
| cov1_3_6_7_9   | 26.948  | -215.755 | 0.4180627 | 0 | -0.042520191 | 0 | 0            |
| cov1_3_6_8_9   | 26.9485 | -215.755 | 0.4180648 | 0 | -0.042968239 | 0 | 0            |
| cov2_3_7_8_10  | 26.9507 | -215.756 | 0.4191104 | 0 | 0            | 0 | -0.068983445 |
| cov2_3_4_8_10  | 26.9508 | -215.756 | 0.419119  | 0 | 0            | 0 | -0.068267381 |
| cov2_3_4_7_10  | 26.9535 | -215.757 | 0.4191172 | 0 | 0            | 0 | -0.068293881 |
| cov5_7_8_10_11 | 26.9712 | -215.766 | 0.415648  | 0 | 0            | 0 | 0            |

|                |         |          |           |   |              |              |
|----------------|---------|----------|-----------|---|--------------|--------------|
| cov3_5_8_10_11 | 26.9717 | -215.766 | 0.4156446 | 0 | 0            | 0            |
| cov4_5_8_10_11 | 26.9717 | -215.766 | 0.4156591 | 0 | 0            | 0            |
| cov3_5_7_10_11 | 26.9743 | -215.768 | 0.415634  | 0 | 0            | 0            |
| cov4_5_7_10_11 | 26.9743 | -215.768 | 0.4156489 | 0 | 0            | 0            |
| cov1_2_5_8_9   | 26.9914 | -215.776 | 0.4180361 | 0 | -0.0360062   | -0.031013824 |
| cov1_2_5_7_9   | 26.9953 | -215.778 | 0.4180315 | 0 | -0.035961005 | -0.03103205  |
| cov3_5_7_8_10  | 26.9971 | -215.779 | 0.4159465 | 0 | 0            | 0            |
| cov3_4_5_8_10  | 26.9977 | -215.779 | 0.4159584 | 0 | 0            | 0            |
| cov1_2_8_9_11  | 26.9998 | -215.78  | 0.4184015 | 0 | -0.054703712 | -0.032454479 |
| cov4_5_7_8_10  | 26.9998 | -215.78  | 0.4160527 | 0 | 0            | 0            |
| cov3_4_5_7_10  | 27.0005 | -215.781 | 0.4159479 | 0 | 0            | 0            |
| cov1_2_3_5_9   | 27.0006 | -215.781 | 0.4194801 | 0 | -0.069269621 | -0.033412869 |
| cov1_2_7_9_11  | 27.004  | -215.783 | 0.418394  | 0 | -0.054611225 | -0.032465702 |
| cov1_2_3_9_11  | 27.0063 | -215.784 | 0.4199616 | 0 | -0.059048325 | -0.03335452  |
| cov2_3_4_10_11 | 27.0115 | -215.786 | 0.4187766 | 0 | 0            | -0.067664247 |
| cov1_2_4_8_9   | 27.0154 | -215.788 | 0.4177816 | 0 | -0.050175241 | -0.034648991 |
| cov1_2_4_7_9   | 27.0192 | -215.79  | 0.417776  | 0 | -0.050132553 | -0.034697468 |
| cov1_2_7_8_9   | 27.0205 | -215.791 | 0.4179533 | 0 | -0.048938943 | -0.031683749 |
| cov1_5_6_7_9   | 27.0219 | -215.792 | 0.4173371 | 0 | -0.027926234 | 0            |
| cov1_4_6_7_9   | 27.0238 | -215.792 | 0.4177989 | 0 | -0.034360047 | 0            |
| cov1_5_6_8_9   | 27.0252 | -215.793 | 0.4173282 | 0 | -0.028580851 | 0            |
| cov1_4_6_8_9   | 27.0266 | -215.794 | 0.4177954 | 0 | -0.034965766 | 0            |
| cov1_6_7_9_11  | 27.0304 | -215.796 | 0.4176596 | 0 | -0.04611507  | 0            |
| cov2_3_4_6_7   | 27.032  | -215.797 | 0.4209184 | 0 | 0            | -0.057563083 |
| cov1_6_8_9_11  | 27.0333 | -215.797 | 0.417656  | 0 | -0.046823666 | 0            |
| cov2_3_4_6_8   | 27.036  | -215.799 | 0.4209396 | 0 | 0            | -0.057788395 |
| cov2_4_8_10_11 | 27.0442 | -215.803 | 0.41754   | 0 | 0            | -0.051420948 |
| cov2_4_7_10_11 | 27.0461 | -215.804 | 0.4175305 | 0 | 0            | -0.051424325 |
| cov1_6_7_8_9   | 27.0512 | -215.806 | 0.4172369 | 0 | -0.040813456 | 0            |
| cov2_5_6_10_11 | 27.0559 | -215.809 | 0.4182252 | 0 | 0            | -0.032335206 |
| cov1_3_5_6_9   | 27.0673 | -215.814 | 0.4186199 | 0 | -0.062974125 | 0            |
| cov1_3_6_9_11  | 27.0679 | -215.815 | 0.4191101 | 0 | -0.053155578 | 0            |
| cov3_5_6_7_9   | 27.0682 | -215.815 | 0.4177657 | 0 | 0            | 0            |
| cov2_4_5_6_7   | 27.07   | -215.816 | 0.4198134 | 0 | 0            | -0.052166957 |
| cov2_7_8_10_11 | 27.0707 | -215.816 | 0.4171469 | 0 | 0            | -0.059725244 |
| cov1_2_4_6_7   | 27.0725 | -215.817 | 0.4197409 | 0 | -0.020836023 | -0.043184354 |
| cov3_5_6_8_9   | 27.0731 | -215.817 | 0.4177722 | 0 | 0            | 0            |
| cov2_4_5_6_8   | 27.076  | -215.819 | 0.4198181 | 0 | 0            | -0.052342575 |
| cov1_2_4_6_8   | 27.0767 | -215.819 | 0.4197242 | 0 | -0.021547847 | -0.04312251  |
| cov5_6_7_9_11  | 27.0807 | -215.821 | 0.4175831 | 0 | 0            | 0            |
| cov4_5_6_7_9   | 27.081  | -215.821 | 0.4176217 | 0 | 0            | 0            |
| cov5_6_7_8_9   | 27.0831 | -215.822 | 0.4174422 | 0 | 0            | 0            |
| cov4_5_9_10_11 | 27.0841 | -215.823 | 0.4168332 | 0 | 0            | 0            |
| cov5_6_8_9_11  | 27.0868 | -215.824 | 0.4175757 | 0 | 0            | 0            |
| cov4_5_6_8_9   | 27.0871 | -215.824 | 0.4176195 | 0 | 0            | 0            |
| cov2_4_7_8_10  | 27.0968 | -215.829 | 0.4183336 | 0 | 0            | -0.057692048 |
| cov2_4_6_7_11  | 27.0972 | -215.829 | 0.4206081 | 0 | 0            | -0.05153083  |

|                |         |          |           |   |              |   |              |
|----------------|---------|----------|-----------|---|--------------|---|--------------|
| cov1_2_6_10_11 | 27.1039 | -215.833 | 0.4180826 | 0 | -0.033921662 | 0 | -0.030597998 |
| cov2_4_6_8_11  | 27.1047 | -215.833 | 0.4206179 | 0 | 0            | 0 | -0.051650856 |
| cov2_3_5_8_9   | 27.1106 | -215.836 | 0.4186373 | 0 | 0            | 0 | -0.044234947 |
| cov1_3_4_6_9   | 27.1137 | -215.837 | 0.4184869 | 0 | -0.04622149  | 0 | 0            |
| cov2_3_5_7_9   | 27.1144 | -215.838 | 0.418629  | 0 | 0            | 0 | -0.044220767 |
| cov2_4_6_7_8   | 27.1155 | -215.838 | 0.4201536 | 0 | 0            | 0 | -0.049451621 |
| cov1_2_6_7_11  | 27.1164 | -215.839 | 0.4214213 | 0 | -0.024777569 | 0 | -0.033141874 |
| cov2_5_7_8_9   | 27.118  | -215.84  | 0.4183653 | 0 | 0            | 0 | -0.042465671 |
| cov2_5_8_9_11  | 27.1182 | -215.84  | 0.418336  | 0 | 0            | 0 | -0.042306337 |
| cov1_2_6_8_11  | 27.1188 | -215.84  | 0.4214152 | 0 | -0.025506483 | 0 | -0.033142191 |
| cov2_5_7_9_11  | 27.1218 | -215.841 | 0.4183279 | 0 | 0            | 0 | -0.042291723 |
| cov3_4_6_7_9   | 27.122  | -215.842 | 0.4186871 | 0 | 0            | 0 | 0            |
| cov3_4_6_8_9   | 27.1272 | -215.844 | 0.4187002 | 0 | 0            | 0 | 0            |
| cov1_2_5_6_7   | 27.1344 | -215.848 | 0.4204241 | 0 | -0.027278193 | 0 | -0.032436275 |
| cov1_2_5_6_8   | 27.1376 | -215.849 | 0.4204134 | 0 | -0.027958378 | 0 | -0.032426299 |
| cov1_3_8_9_11  | 27.139  | -215.85  | 0.4178623 | 0 | -0.081216584 | 0 | 0            |
| cov1_3_4_8_9   | 27.1408 | -215.851 | 0.4178161 | 0 | -0.072747678 | 0 | 0            |
| cov1_2_3_6_7   | 27.142  | -215.852 | 0.4213105 | 0 | -0.018687209 | 0 | -0.032385108 |
| cov1_3_7_9_11  | 27.1431 | -215.852 | 0.4178622 | 0 | -0.081206255 | 0 | 0            |
| cov1_2_3_6_8   | 27.1437 | -215.852 | 0.4213186 | 0 | -0.019343062 | 0 | -0.032388597 |
| cov1_3_4_7_9   | 27.1451 | -215.853 | 0.4178135 | 0 | -0.072754527 | 0 | 0            |
| cov1_3_7_8_9   | 27.1479 | -215.855 | 0.4175912 | 0 | -0.076947264 | 0 | 0            |
| cov1_3_5_8_9   | 27.1484 | -215.855 | 0.4175819 | 0 | -0.076520207 | 0 | 0            |
| cov1_3_5_7_9   | 27.1525 | -215.857 | 0.417582  | 0 | -0.076630234 | 0 | 0            |
| cov1_2_6_7_8   | 27.1575 | -215.859 | 0.4208072 | 0 | -0.018182316 | 0 | -0.032098101 |
| cov2_3_6_7_11  | 27.1589 | -215.86  | 0.4220255 | 0 | 0            | 0 | -0.04079089  |
| cov4_6_7_8_9   | 27.1593 | -215.86  | 0.418348  | 0 | 0            | 0 | 0            |
| cov4_6_7_9_11  | 27.1595 | -215.86  | 0.4183482 | 0 | 0            | 0 | 0            |
| cov2_3_6_8_11  | 27.1632 | -215.862 | 0.4220467 | 0 | 0            | 0 | -0.041014769 |
| cov2_3_5_6_7   | 27.1633 | -215.862 | 0.4216963 | 0 | 0            | 0 | -0.041674823 |
| cov4_6_8_9_11  | 27.1672 | -215.864 | 0.4183523 | 0 | 0            | 0 | 0            |
| cov2_3_5_6_8   | 27.1677 | -215.864 | 0.4217188 | 0 | 0            | 0 | -0.041881147 |
| cov1_2_3_5_6   | 27.1691 | -215.865 | 0.421933  | 0 | -0.063059629 | 0 | -0.034971314 |
| cov2_5_6_7_11  | 27.1714 | -215.866 | 0.4215384 | 0 | 0            | 0 | -0.040670976 |
| cov2_6_7_8_11  | 27.1717 | -215.866 | 0.4215704 | 0 | 0            | 0 | -0.040366258 |
| cov2_3_6_7_8   | 27.1768 | -215.869 | 0.4215837 | 0 | 0            | 0 | -0.038727447 |
| cov2_5_6_8_11  | 27.1773 | -215.869 | 0.4215431 | 0 | 0            | 0 | -0.040825815 |
| cov2_4_6_10_11 | 27.1867 | -215.874 | 0.4185648 | 0 | 0            | 0 | -0.033782016 |
| cov2_5_6_7_8   | 27.1889 | -215.875 | 0.4210618 | 0 | 0            | 0 | -0.038978177 |
| cov3_6_7_9_11  | 27.1909 | -215.876 | 0.4178292 | 0 | 0            | 0 | 0            |
| cov2_4_9_10_11 | 27.1927 | -215.877 | 0.418734  | 0 | 0            | 0 | -0.050649234 |
| cov3_6_7_8_9   | 27.1952 | -215.878 | 0.4180159 | 0 | 0            | 0 | 0            |
| cov1_2_5_10_11 | 27.197  | -215.879 | 0.4176792 | 0 | -0.041958934 | 0 | -0.029940877 |
| cov3_6_8_9_11  | 27.1971 | -215.879 | 0.4178369 | 0 | 0            | 0 | 0            |
| cov2_3_4_5_9   | 27.1992 | -215.88  | 0.4183927 | 0 | 0            | 0 | -0.071621231 |
| cov2_4_5_6_10  | 27.203  | -215.882 | 0.4165544 | 0 | 0            | 0 | -0.030203281 |
| cov1_2_3_4_6   | 27.2052 | -215.883 | 0.4212098 | 0 | -0.03037751  | 0 | -0.057139594 |

|                |         |          |           |   |              |   |              |
|----------------|---------|----------|-----------|---|--------------|---|--------------|
| cov1_2_5_6_10  | 27.2068 | -215.884 | 0.4167635 | 0 | -0.002536686 | 0 | -0.027193583 |
| cov1_4_6_10_11 | 27.2086 | -215.885 | 0.4179552 | 0 | -0.043877042 | 0 | 0            |
| cov1_4_8_9_11  | 27.2088 | -215.885 | 0.4177126 | 0 | -0.071627071 | 0 | 0            |
| cov1_5_8_9_11  | 27.2111 | -215.886 | 0.4171283 | 0 | -0.064569985 | 0 | 0            |
| cov3_4_9_10_11 | 27.2114 | -215.886 | 0.4182062 | 0 | 0            | 0 | 0            |
| cov1_4_5_8_9   | 27.2117 | -215.886 | 0.4172171 | 0 | -0.060902923 | 0 | 0            |
| cov1_4_7_9_11  | 27.2133 | -215.887 | 0.4177039 | 0 | -0.071564467 | 0 | 0            |
| cov1_5_7_9_11  | 27.2156 | -215.888 | 0.4171204 | 0 | -0.064492269 | 0 | 0            |
| cov1_4_5_7_9   | 27.216  | -215.889 | 0.4172113 | 0 | -0.060872553 | 0 | 0            |
| cov1_4_7_8_9   | 27.2201 | -215.891 | 0.4174019 | 0 | -0.066985087 | 0 | 0            |
| cov1_5_7_8_9   | 27.2207 | -215.891 | 0.4168482 | 0 | -0.060010819 | 0 | 0            |
| cov1_3_5_9_11  | 27.2412 | -215.901 | 0.4185173 | 0 | -0.099675404 | 0 | 0            |
| cov1_3_4_5_9   | 27.2425 | -215.902 | 0.418683  | 0 | -0.094526801 | 0 | 0            |
| cov1_5_6_10_11 | 27.2455 | -215.903 | 0.4168757 | 0 | -0.03598923  | 0 | 0            |
| cov1_7_8_9_11  | 27.2501 | -215.906 | 0.4170164 | 0 | -0.080363081 | 0 | 0            |
| cov2_3_4_6_11  | 27.252  | -215.907 | 0.4224361 | 0 | 0            | 0 | -0.068335014 |
| cov1_2_4_10_11 | 27.2561 | -215.909 | 0.4178952 | 0 | -0.060505261 | 0 | -0.025604852 |
| cov1_2_4_6_10  | 27.2564 | -215.909 | 0.4170425 | 0 | -0.019571182 | 0 | -0.022489327 |
| cov1_2_3_4_8   | 27.2693 | -215.915 | 0.4201992 | 0 | -0.065826872 | 0 | -0.051368217 |
| cov1_3_4_9_11  | 27.2697 | -215.915 | 0.4185821 | 0 | -0.084259315 | 0 | 0            |
| cov1_2_3_4_7   | 27.275  | -215.918 | 0.4202007 | 0 | -0.065840241 | 0 | -0.051436086 |
| cov6_7_8_9_11  | 27.2751 | -215.918 | 0.4171236 | 0 | 0            | 0 | 0            |
| cov2_4_5_10_11 | 27.2909 | -215.926 | 0.4169471 | 0 | 0            | 0 | -0.04967868  |
| cov2_3_4_5_6   | 27.2951 | -215.928 | 0.4218613 | 0 | 0            | 0 | -0.065478024 |
| cov4_5_6_10_11 | 27.3045 | -215.933 | 0.4174535 | 0 | 0            | 0 | 0            |
| cov1_3_5_6_7   | 27.3193 | -215.94  | 0.4200207 | 0 | -0.068665841 | 0 | 0            |
| cov1_3_5_6_8   | 27.3197 | -215.94  | 0.4200242 | 0 | -0.069303669 | 0 | 0            |
| cov3_4_8_9_10  | 27.3225 | -215.942 | 0.4193643 | 0 | 0            | 0 | 0            |
| cov4_7_8_9_10  | 27.3225 | -215.942 | 0.4193676 | 0 | 0            | 0 | 0            |
| cov3_4_7_9_10  | 27.3258 | -215.943 | 0.4193578 | 0 | 0            | 0 | 0            |
| cov1_2_3_5_8   | 27.3272 | -215.944 | 0.4209522 | 0 | -0.085064067 | 0 | -0.035105127 |
| cov1_2_4_8_11  | 27.3309 | -215.946 | 0.4199593 | 0 | -0.068179333 | 0 | -0.045034828 |
| cov1_2_4_5_10  | 27.3312 | -215.946 | 0.4162589 | 0 | -0.024664823 | 0 | -0.030594596 |
| cov1_2_3_5_7   | 27.3325 | -215.947 | 0.4209598 | 0 | -0.085296147 | 0 | -0.035132101 |
| cov1_4_5_6_10  | 27.3353 | -215.948 | 0.4166239 | 0 | -0.024970773 | 0 | 0            |
| cov1_2_4_7_11  | 27.3369 | -215.949 | 0.4199554 | 0 | -0.068131686 | 0 | -0.045095643 |
| cov3_4_5_6_9   | 27.346  | -215.954 | 0.4188728 | 0 | 0            | 0 | 0            |
| cov3_4_6_9_11  | 27.3519 | -215.957 | 0.4192406 | 0 | 0            | 0 | 0            |
| cov1_2_4_5_8   | 27.352  | -215.957 | 0.4194446 | 0 | -0.055300872 | 0 | -0.047280843 |
| cov3_5_6_9_11  | 27.3527 | -215.957 | 0.4186263 | 0 | 0            | 0 | 0            |
| cov1_4_5_10_11 | 27.3576 | -215.959 | 0.4173135 | 0 | -0.064854186 | 0 | 0            |
| cov1_2_4_5_7   | 27.3577 | -215.959 | 0.4194432 | 0 | -0.055300124 | 0 | -0.047350507 |
| cov1_5_6_7_11  | 27.3583 | -215.96  | 0.4197491 | 0 | -0.05893535  | 0 | 0            |
| cov1_2_4_7_8   | 27.3584 | -215.96  | 0.4194763 | 0 | -0.061564416 | 0 | -0.043998644 |
| cov1_5_6_8_11  | 27.3608 | -215.961 | 0.4197446 | 0 | -0.059625939 | 0 | 0            |
| cov1_3_6_7_11  | 27.3659 | -215.964 | 0.4205284 | 0 | -0.051010097 | 0 | 0            |
| cov1_3_6_8_11  | 27.3672 | -215.964 | 0.4205391 | 0 | -0.051680508 | 0 | 0            |



|                |         |          |           |   |              |   |              |
|----------------|---------|----------|-----------|---|--------------|---|--------------|
| cov1_4_5_6_7   | 27.3707 | -215.966 | 0.4197342 | 0 | -0.05375441  | 0 | 0            |
| cov1_4_5_6_8   | 27.3734 | -215.967 | 0.4197297 | 0 | -0.054414861 | 0 | 0            |
| cov1_6_7_8_11  | 27.377  | -215.969 | 0.420109  | 0 | -0.050441891 | 0 | 0            |
| cov1_4_6_7_11  | 27.3775 | -215.969 | 0.4201192 | 0 | -0.050186227 | 0 | 0            |
| cov1_4_6_8_11  | 27.3798 | -215.97  | 0.4201198 | 0 | -0.050861216 | 0 | 0            |
| cov2_3_8_9_11  | 27.3816 | -215.971 | 0.4186955 | 0 | 0            | 0 | -0.063169529 |
| cov2_3_7_9_11  | 27.3848 | -215.973 | 0.4186898 | 0 | 0            | 0 | -0.06314378  |
| cov1_2_5_8_11  | 27.3852 | -215.973 | 0.4205628 | 0 | -0.074523279 | 0 | -0.034550597 |
| cov1_5_6_7_8   | 27.3854 | -215.973 | 0.4192975 | 0 | -0.052769103 | 0 | 0            |
| cov1_3_4_6_7   | 27.39   | -215.976 | 0.4199233 | 0 | -0.047040913 | 0 | 0            |
| cov1_2_5_7_11  | 27.3915 | -215.976 | 0.4205595 | 0 | -0.074525647 | 0 | -0.034574966 |
| cov1_3_4_6_8   | 27.3917 | -215.976 | 0.4199295 | 0 | -0.047714312 | 0 | 0            |
| cov1_3_6_7_8   | 27.392  | -215.977 | 0.4200778 | 0 | -0.045123383 | 0 | 0            |
| cov1_2_3_8_11  | 27.3985 | -215.98  | 0.4214175 | 0 | -0.065449763 | 0 | -0.034448435 |
| cov1_2_3_5_11  | 27.399  | -215.98  | 0.4221616 | 0 | -0.10975859  | 0 | -0.037246971 |
| cov1_4_6_7_8   | 27.4039 | -215.983 | 0.4196522 | 0 | -0.044332735 | 0 | 0            |
| cov1_2_3_7_11  | 27.4052 | -215.983 | 0.4214196 | 0 | -0.065422952 | 0 | -0.034464834 |
| cov1_3_5_6_11  | 27.4062 | -215.984 | 0.4211955 | 0 | -0.095693034 | 0 | 0            |
| cov3_4_5_10_11 | 27.4112 | -215.986 | 0.4164698 | 0 | 0            | 0 | 0            |
| cov1_2_5_7_8   | 27.4113 | -215.986 | 0.4200856 | 0 | -0.06797045  | 0 | -0.033690018 |
| cov1_2_7_8_11  | 27.4119 | -215.987 | 0.4209647 | 0 | -0.064722776 | 0 | -0.03418002  |
| cov1_2_3_4_5   | 27.4125 | -215.987 | 0.4211307 | 0 | -0.094856734 | 0 | -0.046871128 |
| cov1_2_3_6_11  | 27.4132 | -215.987 | 0.4234629 | 0 | -0.033947739 | 0 | -0.034374578 |
| cov2_3_5_6_11  | 27.4207 | -215.991 | 0.4234996 | 0 | 0            | 0 | -0.05041183  |
| cov1_2_3_7_8   | 27.4233 | -215.992 | 0.4209499 | 0 | -0.059239232 | 0 | -0.033612513 |
| cov1_3_4_5_6   | 27.4249 | -215.993 | 0.4212636 | 0 | -0.089734613 | 0 | 0            |
| cov2_3_5_9_11  | 27.4301 | -215.996 | 0.4195557 | 0 | 0            | 0 | -0.052654314 |
| cov1_2_3_4_11  | 27.4349 | -215.998 | 0.4216109 | 0 | -0.081110246 | 0 | -0.058533873 |
| cov2_3_4_8_9   | 27.4476 | -216.004 | 0.4194673 | 0 | 0            | 0 | -0.073156757 |
| cov2_3_7_8_9   | 27.4484 | -216.005 | 0.4195001 | 0 | 0            | 0 | -0.071338563 |
| cov2_3_4_7_9   | 27.4509 | -216.006 | 0.4194635 | 0 | 0            | 0 | -0.07317494  |
| cov1_2_6_9_11  | 27.4752 | -216.018 | 0.4189094 | 0 | -0.034497897 | 0 | -0.031837102 |
| cov2_4_8_9_11  | 27.4849 | -216.023 | 0.4180331 | 0 | 0            | 0 | -0.058153548 |
| cov2_4_7_9_11  | 27.4874 | -216.024 | 0.4180259 | 0 | 0            | 0 | -0.058156264 |
| cov2_7_8_9_11  | 27.4915 | -216.026 | 0.4178322 | 0 | 0            | 0 | -0.062398116 |
| cov2_5_6_9_11  | 27.5117 | -216.036 | 0.419044  | 0 | 0            | 0 | -0.036438413 |
| cov2_4_7_8_9   | 27.5419 | -216.051 | 0.418838  | 0 | 0            | 0 | -0.064559411 |
| cov3_4_8_10_11 | 27.5665 | -216.064 | 0.4166947 | 0 | 0            | 0 | 0            |
| cov3_4_7_10_11 | 27.5689 | -216.065 | 0.4166856 | 0 | 0            | 0 | 0            |
| cov2_3_4_9_11  | 27.5714 | -216.066 | 0.419253  | 0 | 0            | 0 | -0.074061632 |
| cov2_4_6_9_11  | 27.5805 | -216.071 | 0.4191739 | 0 | 0            | 0 | -0.039239062 |
| cov4_7_8_10_11 | 27.5821 | -216.072 | 0.4165508 | 0 | 0            | 0 | 0            |
| cov1_3_4_5_8   | 27.5932 | -216.077 | 0.4202189 | 0 | -0.11257071  | 0 | 0            |
| cov1_3_4_5_7   | 27.5988 | -216.08  | 0.4202279 | 0 | -0.11284604  | 0 | 0            |
| cov1_3_5_8_11  | 27.6065 | -216.084 | 0.4199548 | 0 | -0.11673117  | 0 | 0            |
| cov1_3_5_7_11  | 27.6122 | -216.087 | 0.4199626 | 0 | -0.11702162  | 0 | 0            |
| cov1_3_5_7_8   | 27.6193 | -216.09  | 0.4196414 | 0 | -0.11172243  | 0 | 0            |

|                |         |          |           |   |              |   |              |
|----------------|---------|----------|-----------|---|--------------|---|--------------|
| cov3_5_8_9_11  | 27.622  | -216.092 | 0.4158575 | 0 | 0            | 0 | 0            |
| cov3_5_7_9_11  | 27.6246 | -216.093 | 0.4158456 | 0 | 0            | 0 | 0            |
| cov3_4_5_6_7   | 27.6279 | -216.095 | 0.4204519 | 0 | 0            | 0 | 0            |
| cov4_5_6_7_8   | 27.6287 | -216.095 | 0.4205626 | 0 | 0            | 0 | 0            |
| cov4_5_6_7_11  | 27.6288 | -216.095 | 0.4205201 | 0 | 0            | 0 | 0            |
| cov3_5_6_7_8   | 27.6339 | -216.097 | 0.4201575 | 0 | 0            | 0 | 0            |
| cov4_5_8_9_11  | 27.634  | -216.098 | 0.4161203 | 0 | 0            | 0 | 0            |
| cov4_6_7_8_11  | 27.634  | -216.098 | 0.4205892 | 0 | 0            | 0 | 0            |
| cov3_5_6_7_11  | 27.6341 | -216.098 | 0.4201346 | 0 | 0            | 0 | 0            |
| cov5_7_8_9_11  | 27.6341 | -216.098 | 0.4160204 | 0 | 0            | 0 | 0            |
| cov3_4_6_7_11  | 27.6344 | -216.098 | 0.4205842 | 0 | 0            | 0 | 0            |
| cov3_4_6_7_8   | 27.6346 | -216.098 | 0.4206533 | 0 | 0            | 0 | 0            |
| cov5_6_7_8_11  | 27.6347 | -216.098 | 0.4202233 | 0 | 0            | 0 | 0            |
| cov4_5_7_9_11  | 27.6372 | -216.099 | 0.4161108 | 0 | 0            | 0 | 0            |
| cov3_4_5_6_8   | 27.6377 | -216.099 | 0.4204793 | 0 | 0            | 0 | 0            |
| cov4_5_6_8_11  | 27.6382 | -216.1   | 0.4205276 | 0 | 0            | 0 | 0            |
| cov1_4_6_9_11  | 27.6409 | -216.101 | 0.4184944 | 0 | -0.048074178 | 0 | 0            |
| cov2_4_5_8_11  | 27.6419 | -216.101 | 0.4200033 | 0 | 0            | 0 | -0.07968714  |
| cov1_4_5_8_11  | 27.6429 | -216.102 | 0.4198367 | 0 | -0.10209528  | 0 | 0            |
| cov2_4_5_7_8   | 27.643  | -216.102 | 0.4201274 | 0 | 0            | 0 | -0.080807117 |
| cov2_3_4_5_8   | 27.6433 | -216.102 | 0.420105  | 0 | 0            | 0 | -0.080522416 |
| cov3_5_6_8_11  | 27.6441 | -216.103 | 0.420154  | 0 | 0            | 0 | 0            |
| cov3_4_6_8_11  | 27.6442 | -216.103 | 0.4206104 | 0 | 0            | 0 | 0            |
| cov2_4_5_7_11  | 27.6474 | -216.104 | 0.4199971 | 0 | 0            | 0 | -0.07972827  |
| cov2_3_4_5_7   | 27.6489 | -216.105 | 0.4200936 | 0 | 0            | 0 | -0.080517204 |
| cov1_4_5_7_11  | 27.6495 | -216.105 | 0.4198353 | 0 | -0.10213214  | 0 | 0            |
| cov1_2_5_6_9   | 27.6539 | -216.108 | 0.4174648 | 0 | -0.013341321 | 0 | -0.029054363 |
| cov1_2_5_9_11  | 27.6581 | -216.11  | 0.4183799 | 0 | -0.056291804 | 0 | -0.032013522 |
| cov1_4_5_7_8   | 27.6583 | -216.11  | 0.4194803 | 0 | -0.096497166 | 0 | 0            |
| cov3_5_7_8_9   | 27.6584 | -216.11  | 0.4162051 | 0 | 0            | 0 | 0            |
| cov3_4_5_8_9   | 27.6585 | -216.11  | 0.4163251 | 0 | 0            | 0 | 0            |
| cov2_4_5_6_9   | 27.6598 | -216.11  | 0.4173334 | 0 | 0            | 0 | -0.034794919 |
| cov3_4_5_7_9   | 27.6615 | -216.111 | 0.4163073 | 0 | 0            | 0 | 0            |
| cov1_2_4_6_9   | 27.6635 | -216.112 | 0.4175398 | 0 | -0.020609923 | 0 | -0.027355072 |
| cov3_6_7_8_11  | 27.6652 | -216.113 | 0.4199982 | 0 | 0            | 0 | 0            |
| cov1_3_4_6_11  | 27.666  | -216.114 | 0.421443  | 0 | -0.066558381 | 0 | 0            |
| cov1_5_7_8_11  | 27.6688 | -216.115 | 0.4192612 | 0 | -0.10110039  | 0 | 0            |
| cov1_2_4_9_11  | 27.6724 | -216.117 | 0.4184381 | 0 | -0.065148105 | 0 | -0.030639498 |
| cov1_3_4_5_11  | 27.6788 | -216.12  | 0.421424  | 0 | -0.13756916  | 0 | 0            |
| cov1_3_4_8_11  | 27.68   | -216.121 | 0.4199425 | 0 | -0.093845732 | 0 | 0            |
| cov1_3_7_8_11  | 27.6801 | -216.121 | 0.4200121 | 0 | -0.092981376 | 0 | 0            |
| cov1_3_4_7_11  | 27.6869 | -216.124 | 0.4199415 | 0 | -0.093865849 | 0 | 0            |
| cov4_5_7_8_9   | 27.688  | -216.125 | 0.4166498 | 0 | 0            | 0 | 0            |
| cov1_4_7_8_11  | 27.6894 | -216.125 | 0.4197286 | 0 | -0.091342014 | 0 | 0            |
| cov1_3_4_7_8   | 27.6929 | -216.127 | 0.419623  | 0 | -0.08899671  | 0 | 0            |
| cov1_5_6_9_11  | 27.699  | -216.13  | 0.4176015 | 0 | -0.049149213 | 0 | 0            |
| cov3_8_9_10_11 | 27.7789 | -216.17  | 0.4134553 | 0 | 0            | 0 | 0            |

|                  |         |          |           |   |              |              |
|------------------|---------|----------|-----------|---|--------------|--------------|
| cov3_7_9_10_11   | 27.78   | -216.171 | 0.4134496 | 0 | 0            | 0            |
| cov1_4_5_6_9     | 27.7895 | -216.175 | 0.4174289 | 0 | -0.037687461 | 0            |
| cov1_2_4_5_9     | 27.8116 | -216.186 | 0.4169842 | 0 | -0.039644799 | -0.031192579 |
| cov1_2_5_6_11    | 27.8151 | -216.188 | 0.4209256 | 0 | -0.051190704 | -0.033849562 |
| cov1_2_4_6_11    | 27.8262 | -216.194 | 0.420764  | 0 | -0.040629857 | -0.040485769 |
| cov4_5_6_9_11    | 27.8268 | -216.194 | 0.4182233 | 0 | 0            | 0            |
| cov1_4_5_9_11    | 27.8301 | -216.196 | 0.4181033 | 0 | -0.081163618 | 0            |
| cov2_4_5_9_11    | 27.8559 | -216.209 | 0.4175083 | 0 | 0            | -0.056783147 |
| cov3_4_7_8_10    | 27.8936 | -216.227 | 0.4183024 | 0 | 0            | 0            |
| cov7_8_9_10_11   | 27.9386 | -216.25  | 0.4125687 | 0 | 0            | 0            |
| cov2_3_5_8_11    | 27.9511 | -216.256 | 0.4211918 | 0 | 0            | -0.056912593 |
| cov2_3_5_7_11    | 27.9569 | -216.259 | 0.4211793 | 0 | 0            | -0.056873021 |
| cov2_4_5_6_11    | 27.958  | -216.26  | 0.4210429 | 0 | 0            | -0.052842358 |
| cov2_3_5_7_8     | 27.969  | -216.265 | 0.4215981 | 0 | 0            | -0.058993766 |
| cov2_5_7_8_11    | 27.9736 | -216.267 | 0.4217078 | 0 | 0            | -0.060141119 |
| cov1_4_5_6_11    | 27.9958 | -216.278 | 0.4207444 | 0 | -0.077997579 | 0            |
| cov1_2_4_5_6     | 28.0368 | -216.299 | 0.4194432 | 0 | -0.03748922  | -0.031026104 |
| cov2_3_4_8_11    | 28.0893 | -216.325 | 0.4207661 | 0 | 0            | -0.082297879 |
| cov2_3_4_7_11    | 28.0944 | -216.328 | 0.4207575 | 0 | 0            | -0.0822929   |
| cov3_4_5_6_11    | 28.0981 | -216.33  | 0.4222338 | 0 | 0            | 0            |
| cov1_2_4_5_11    | 28.1047 | -216.333 | 0.4204397 | 0 | -0.089885123 | -0.035801808 |
| cov2_4_7_8_11    | 28.1065 | -216.334 | 0.4204286 | 0 | 0            | -0.078156921 |
| cov2_3_7_8_11    | 28.1265 | -216.344 | 0.4211138 | 0 | 0            | -0.071828276 |
| cov4_7_8_9_11    | 28.1769 | -216.369 | 0.4169109 | 0 | 0            | 0            |
| cov3_4_8_9_11    | 28.1772 | -216.369 | 0.4169332 | 0 | 0            | 0            |
| cov3_4_7_9_11    | 28.1798 | -216.37  | 0.4169217 | 0 | 0            | 0            |
| cov3_4_5_9_11    | 28.2042 | -216.383 | 0.4168873 | 0 | 0            | 0            |
| cov2_3_4_7_8     | 28.2093 | -216.385 | 0.4219626 | 0 | 0            | -0.091473261 |
| cov2_3_4_5_11    | 28.2749 | -216.418 | 0.421879  | 0 | 0            | -0.097916584 |
| cov3_7_8_10_11   | 28.4216 | -216.491 | 0.4126225 | 0 | 0            | 0            |
| cov3_4_7_8_9     | 28.5268 | -216.544 | 0.4185246 | 0 | 0            | 0            |
| cov3_4_5_8_11    | 28.854  | -216.708 | 0.4186496 | 0 | 0            | 0            |
| cov3_5_7_8_11    | 28.8573 | -216.709 | 0.4183519 | 0 | 0            | 0            |
| cov3_4_5_7_11    | 28.8574 | -216.709 | 0.4186273 | 0 | 0            | 0            |
| cov3_4_5_7_8     | 29.0102 | -216.786 | 0.4195499 | 0 | 0            | 0            |
| cov3_7_8_9_11    | 29.0506 | -216.806 | 0.4128319 | 0 | 0            | 0            |
| cov4_5_7_8_11    | 29.1351 | -216.848 | 0.4199832 | 0 | 0            | 0            |
| cov3_4_7_8_11    | 29.3837 | -216.972 | 0.4194681 | 0 | 0            | 0            |
| cov3_7_8_9_10    | 30.035  | -217.298 | 0.4133568 | 0 | 0            | 0            |
| cov2_3_6_7_9_10  | 32.5423 | -215.029 | 0.4203721 | 0 | 0            | -0.035999472 |
| cov2_3_6_8_9_10  | 32.5438 | -215.03  | 0.4203815 | 0 | 0            | -0.036121667 |
| cov2_3_4_6_9_10  | 32.5666 | -215.041 | 0.4204046 | 0 | 0            | -0.050433533 |
| cov1_2_3_6_9_10  | 32.5759 | -215.046 | 0.4204095 | 0 | -0.025685703 | -0.028059825 |
| cov2_5_6_7_9_10  | 32.6244 | -215.07  | 0.4189474 | 0 | 0            | -0.026618831 |
| cov2_5_6_8_9_10  | 32.6277 | -215.072 | 0.4189451 | 0 | 0            | -0.026744194 |
| cov2_3_6_9_10_11 | 32.6313 | -215.074 | 0.4211232 | 0 | 0            | -0.038364115 |
| cov2_3_5_6_9_10  | 32.6396 | -215.078 | 0.4207187 | 0 | 0            | -0.035577176 |

|                  |         |          |           |   |              |   |              |
|------------------|---------|----------|-----------|---|--------------|---|--------------|
| cov1_2_3_4_9_10  | 32.6668 | -215.091 | 0.4195218 | 0 | -0.061311609 | 0 | -0.041652815 |
| cov1_2_3_8_9_10  | 32.6668 | -215.092 | 0.4196184 | 0 | -0.0550852   | 0 | -0.0289645   |
| cov1_2_3_7_9_10  | 32.67   | -215.093 | 0.4196207 | 0 | -0.055077009 | 0 | -0.028970532 |
| cov1_3_6_8_9_10  | 32.6763 | -215.096 | 0.4189011 | 0 | -0.046454788 | 0 | 0            |
| cov1_3_6_7_9_10  | 32.6764 | -215.096 | 0.4188999 | 0 | -0.046131752 | 0 | 0            |
| cov1_2_6_7_9_10  | 32.7012 | -215.109 | 0.4188168 | 0 | -0.021031418 | 0 | -0.027511035 |
| cov1_2_6_8_9_10  | 32.7047 | -215.11  | 0.4188068 | 0 | -0.021712206 | 0 | -0.027503324 |
| cov2_4_5_8_9_10  | 32.7156 | -215.116 | 0.4174908 | 0 | 0            | 0 | -0.050883472 |
| cov2_4_5_7_9_10  | 32.7184 | -215.117 | 0.4174845 | 0 | 0            | 0 | -0.050916146 |
| cov1_2_3_9_10_11 | 32.7233 | -215.12  | 0.4203867 | 0 | -0.061735539 | 0 | -0.029699121 |
| cov1_2_3_5_9_10  | 32.7339 | -215.125 | 0.420022  | 0 | -0.064685733 | 0 | -0.029483351 |
| cov2_6_7_9_10_11 | 32.7403 | -215.128 | 0.4193736 | 0 | 0            | 0 | -0.035775234 |
| cov1_3_6_9_10_11 | 32.7404 | -215.128 | 0.4196597 | 0 | -0.053801921 | 0 | 0            |
| cov2_4_6_7_9_10  | 32.7453 | -215.131 | 0.4191193 | 0 | 0            | 0 | -0.034823819 |
| cov2_6_7_8_9_10  | 32.7453 | -215.131 | 0.4191271 | 0 | 0            | 0 | -0.034646972 |
| cov2_6_8_9_10_11 | 32.7467 | -215.131 | 0.419372  | 0 | 0            | 0 | -0.035997443 |
| cov2_4_6_8_9_10  | 32.7518 | -215.134 | 0.4191245 | 0 | 0            | 0 | -0.034914279 |
| cov1_3_5_6_9_10  | 32.7541 | -215.135 | 0.4192867 | 0 | -0.056372551 | 0 | 0            |
| cov1_3_4_6_9_10  | 32.7638 | -215.14  | 0.4192351 | 0 | -0.048609973 | 0 | 0            |
| cov3_5_6_7_9_10  | 32.7782 | -215.147 | 0.4185429 | 0 | 0            | 0 | 0            |
| cov3_5_6_8_9_10  | 32.7816 | -215.149 | 0.4185463 | 0 | 0            | 0 | 0            |
| cov1_5_6_7_9_10  | 32.7894 | -215.153 | 0.4178974 | 0 | -0.020751392 | 0 | 0            |
| cov1_5_6_8_9_10  | 32.7925 | -215.154 | 0.4178899 | 0 | -0.021401175 | 0 | 0            |
| cov1_2_5_8_9_10  | 32.8    | -215.158 | 0.4184796 | 0 | -0.030869808 | 0 | -0.027076582 |
| cov1_2_5_7_9_10  | 32.8038 | -215.16  | 0.4184755 | 0 | -0.030823783 | 0 | -0.027098998 |
| cov5_6_7_9_10_11 | 32.8221 | -215.169 | 0.4180634 | 0 | 0            | 0 | 0            |
| cov4_5_6_7_9_10  | 32.823  | -215.17  | 0.4179405 | 0 | 0            | 0 | 0            |
| cov5_6_7_8_9_10  | 32.8231 | -215.17  | 0.4179736 | 0 | 0            | 0 | 0            |
| cov5_6_8_9_10_11 | 32.8274 | -215.172 | 0.4180555 | 0 | 0            | 0 | 0            |
| cov4_5_6_8_9_10  | 32.8283 | -215.172 | 0.4179317 | 0 | 0            | 0 | 0            |
| cov1_4_6_7_9_10  | 32.8396 | -215.178 | 0.4184173 | 0 | -0.035595544 | 0 | 0            |
| cov1_4_6_8_9_10  | 32.8424 | -215.179 | 0.4184133 | 0 | -0.036183362 | 0 | 0            |
| cov2_3_4_5_9_10  | 32.8594 | -215.188 | 0.418891  | 0 | 0            | 0 | -0.066986959 |
| cov1_3_4_8_9_10  | 32.8611 | -215.189 | 0.4186418 | 0 | -0.075873749 | 0 | 0            |
| cov1_3_5_8_9_10  | 32.8616 | -215.189 | 0.4183549 | 0 | -0.072155543 | 0 | 0            |
| cov1_3_8_9_10_11 | 32.8639 | -215.19  | 0.4185988 | 0 | -0.082183127 | 0 | 0            |
| cov1_3_4_7_9_10  | 32.8645 | -215.19  | 0.4186415 | 0 | -0.075904269 | 0 | 0            |
| cov1_3_5_7_9_10  | 32.8652 | -215.191 | 0.4183579 | 0 | -0.072321736 | 0 | 0            |
| cov2_3_5_8_9_10  | 32.8653 | -215.191 | 0.4192848 | 0 | 0            | 0 | -0.040140353 |
| cov1_3_7_8_9_10  | 32.8661 | -215.191 | 0.4184411 | 0 | -0.079670758 | 0 | 0            |
| cov1_3_7_9_10_11 | 32.8672 | -215.192 | 0.4186027 | 0 | -0.08220154  | 0 | 0            |
| cov2_3_5_7_9_10  | 32.869  | -215.193 | 0.4192798 | 0 | 0            | 0 | -0.040139413 |
| cov1_6_7_9_10_11 | 32.87   | -215.193 | 0.4180409 | 0 | -0.047471651 | 0 | 0            |
| cov1_6_8_9_10_11 | 32.873  | -215.195 | 0.4180368 | 0 | -0.048174598 | 0 | 0            |
| cov1_2_8_9_10_11 | 32.8813 | -215.199 | 0.4186667 | 0 | -0.05805563  | 0 | -0.028960214 |
| cov1_6_7_8_9_10  | 32.8817 | -215.199 | 0.4177204 | 0 | -0.043508972 | 0 | 0            |
| cov1_2_7_9_10_11 | 32.8852 | -215.201 | 0.4186597 | 0 | -0.057962088 | 0 | -0.028971152 |

|                  |         |          |           |   |              |              |
|------------------|---------|----------|-----------|---|--------------|--------------|
| cov3_4_6_7_9_10  | 32.8876 | -215.202 | 0.4195462 | 0 | 0            | 0            |
| cov3_4_6_8_9_10  | 32.8915 | -215.204 | 0.4195573 | 0 | 0            | 0            |
| cov2_5_8_9_10_11 | 32.8923 | -215.204 | 0.4186625 | 0 | 0            | -0.036282883 |
| cov1_2_7_8_9_10  | 32.8924 | -215.204 | 0.4183505 | 0 | -0.05386596  | -0.028357717 |
| cov1_2_4_8_9_10  | 32.8925 | -215.204 | 0.4183475 | 0 | -0.053779668 | -0.028183771 |
| cov2_5_7_8_9_10  | 32.893  | -215.205 | 0.4187634 | 0 | 0            | -0.036825397 |
| cov2_5_7_9_10_11 | 32.8957 | -215.206 | 0.418655  | 0 | 0            | -0.036266894 |
| cov1_2_4_7_9_10  | 32.8961 | -215.206 | 0.4183426 | 0 | -0.053739649 | -0.02822795  |
| cov1_3_5_9_10_11 | 32.929  | -215.223 | 0.4190661 | 0 | -0.090167852 | 0            |
| cov1_3_4_9_10_11 | 32.9312 | -215.224 | 0.4191659 | 0 | -0.083715725 | 0            |
| cov1_3_4_5_9_10  | 32.9331 | -215.225 | 0.419106  | 0 | -0.086666161 | 0            |
| cov3_6_7_9_10_11 | 32.9526 | -215.234 | 0.4185141 | 0 | 0            | 0            |
| cov3_6_8_9_10_11 | 32.9572 | -215.237 | 0.4185216 | 0 | 0            | 0            |
| cov3_6_7_8_9_10  | 32.9671 | -215.242 | 0.4188389 | 0 | 0            | 0            |
| cov1_5_8_9_10_11 | 32.9712 | -215.244 | 0.4175913 | 0 | -0.054378106 | 0            |
| cov1_4_5_8_9_10  | 32.9734 | -215.245 | 0.4175562 | 0 | -0.051994265 | 0            |
| cov1_5_7_8_9_10  | 32.9744 | -215.245 | 0.4174238 | 0 | -0.051656625 | 0            |
| cov1_5_7_9_10_11 | 32.9752 | -215.246 | 0.4175838 | 0 | -0.054295625 | 0            |
| cov1_4_5_7_9_10  | 32.9774 | -215.247 | 0.4175505 | 0 | -0.051959781 | 0            |
| cov4_6_7_9_10_11 | 32.984  | -215.25  | 0.4188626 | 0 | 0            | 0            |
| cov3_4_5_6_9_10  | 32.9843 | -215.25  | 0.4192881 | 0 | 0            | 0            |
| cov3_5_6_9_10_11 | 32.985  | -215.251 | 0.4192047 | 0 | 0            | 0            |
| cov4_6_7_8_9_10  | 32.9852 | -215.251 | 0.4189875 | 0 | 0            | 0            |
| cov4_6_8_9_10_11 | 32.9916 | -215.254 | 0.4188665 | 0 | 0            | 0            |
| cov1_4_8_9_10_11 | 33.0221 | -215.269 | 0.4182374 | 0 | -0.070590249 | 0            |
| cov1_4_7_9_10_11 | 33.0263 | -215.271 | 0.4182295 | 0 | -0.070528603 | 0            |
| cov1_4_7_8_9_10  | 33.0272 | -215.272 | 0.418027  | 0 | -0.067465672 | 0            |
| cov3_4_6_9_10_11 | 33.0283 | -215.272 | 0.4198114 | 0 | 0            | 0            |
| cov1_7_8_9_10_11 | 33.0803 | -215.298 | 0.4174086 | 0 | -0.080956286 | 0            |
| cov2_3_5_9_10_11 | 33.106  | -215.311 | 0.419973  | 0 | 0            | -0.046778729 |
| cov6_7_8_9_10_11 | 33.1294 | -215.323 | 0.4174861 | 0 | 0            | 0            |
| cov2_3_8_9_10_11 | 33.2273 | -215.372 | 0.4192645 | 0 | 0            | -0.06175948  |
| cov2_3_7_9_10_11 | 33.2302 | -215.373 | 0.419262  | 0 | 0            | -0.061745774 |
| cov4_5_8_9_10_11 | 33.2686 | -215.392 | 0.4165438 | 0 | 0            | 0            |
| cov5_7_8_9_10_11 | 33.2689 | -215.393 | 0.4166493 | 0 | 0            | 0            |
| cov3_5_8_9_10_11 | 33.2694 | -215.393 | 0.4166542 | 0 | 0            | 0            |
| cov4_5_7_9_10_11 | 33.2716 | -215.394 | 0.4165349 | 0 | 0            | 0            |
| cov3_5_7_9_10_11 | 33.2724 | -215.394 | 0.4166448 | 0 | 0            | 0            |
| cov3_4_5_8_9_10  | 33.3151 | -215.416 | 0.4169456 | 0 | 0            | 0            |
| cov3_5_7_8_9_10  | 33.3154 | -215.416 | 0.4170493 | 0 | 0            | 0            |
| cov4_5_7_8_9_10  | 33.318  | -215.417 | 0.4170545 | 0 | 0            | 0            |
| cov3_4_5_7_9_10  | 33.3183 | -215.417 | 0.4169351 | 0 | 0            | 0            |
| cov2_3_4_6_7_10  | 33.3202 | -215.418 | 0.4188049 | 0 | 0            | -0.046286025 |
| cov2_3_4_6_8_10  | 33.3215 | -215.419 | 0.4188142 | 0 | 0            | -0.046401138 |
| cov2_5_6_9_10_11 | 33.3245 | -215.42  | 0.419287  | 0 | 0            | -0.03121261  |
| cov1_2_3_6_7_10  | 33.326  | -215.421 | 0.4187855 | 0 | -0.017972703 | -0.03024108  |
| cov1_2_3_6_8_10  | 33.326  | -215.421 | 0.4187925 | 0 | -0.018279303 | -0.030257001 |

|                  |         |          |           |   |              |   |              |
|------------------|---------|----------|-----------|---|--------------|---|--------------|
| cov2_3_5_6_7_10  | 33.3336 | -215.425 | 0.4187323 | 0 | 0            | 0 | -0.032027197 |
| cov2_3_5_6_8_10  | 33.3346 | -215.425 | 0.4187391 | 0 | 0            | 0 | -0.032135901 |
| cov2_3_7_8_9_10  | 33.3385 | -215.427 | 0.4203146 | 0 | 0            | 0 | -0.072308501 |
| cov2_3_4_8_9_10  | 33.3386 | -215.427 | 0.4203245 | 0 | 0            | 0 | -0.071413847 |
| cov2_3_4_7_9_10  | 33.3415 | -215.429 | 0.4203235 | 0 | 0            | 0 | -0.071446435 |
| cov1_2_3_4_6_10  | 33.3437 | -215.43  | 0.4187018 | 0 | -0.024053274 | 0 | -0.043186344 |
| cov2_3_4_5_6_10  | 33.3458 | -215.431 | 0.4184561 | 0 | 0            | 0 | -0.051093842 |
| cov2_3_6_7_10_11 | 33.3493 | -215.433 | 0.4193636 | 0 | 0            | 0 | -0.037797918 |
| cov2_3_6_8_10_11 | 33.3507 | -215.433 | 0.4193723 | 0 | 0            | 0 | -0.03791589  |
| cov1_2_6_9_10_11 | 33.3509 | -215.434 | 0.41914   | 0 | -0.038371476 | 0 | -0.028345845 |
| cov2_3_4_9_10_11 | 33.3551 | -215.436 | 0.4197572 | 0 | 0            | 0 | -0.069064988 |
| cov2_4_5_6_7_10  | 33.3557 | -215.436 | 0.4167782 | 0 | 0            | 0 | -0.038215205 |
| cov2_3_6_7_8_10  | 33.3582 | -215.437 | 0.4190357 | 0 | 0            | 0 | -0.036324557 |
| cov2_4_5_6_8_10  | 33.3586 | -215.437 | 0.4167767 | 0 | 0            | 0 | -0.038359167 |
| cov1_2_3_6_10_11 | 33.3777 | -215.447 | 0.4198015 | 0 | -0.027147163 | 0 | -0.031327158 |
| cov2_3_4_6_10_11 | 33.3828 | -215.45  | 0.4195509 | 0 | 0            | 0 | -0.051584359 |
| cov2_5_6_7_10_11 | 33.406  | -215.461 | 0.4182572 | 0 | 0            | 0 | -0.029344177 |
| cov2_4_8_9_10_11 | 33.4068 | -215.462 | 0.4184782 | 0 | 0            | 0 | -0.052287107 |
| cov2_4_7_9_10_11 | 33.4089 | -215.463 | 0.4184687 | 0 | 0            | 0 | -0.052290177 |
| cov2_5_6_8_10_11 | 33.4089 | -215.463 | 0.4182571 | 0 | 0            | 0 | -0.029464899 |
| cov2_3_4_5_8_10  | 33.4122 | -215.464 | 0.4170802 | 0 | 0            | 0 | -0.056992935 |
| cov1_2_3_5_6_10  | 33.4127 | -215.464 | 0.4192257 | 0 | -0.028615579 | 0 | -0.030801311 |
| cov2_3_4_5_7_10  | 33.4154 | -215.466 | 0.4170746 | 0 | 0            | 0 | -0.056995993 |
| cov1_2_5_6_7_10  | 33.4302 | -215.473 | 0.4177564 | 0 | 0.005183035  | 0 | -0.028410133 |
| cov2_5_6_7_8_10  | 33.4317 | -215.474 | 0.4176955 | 0 | 0            | 0 | -0.027375052 |
| cov1_2_5_6_8_10  | 33.4336 | -215.475 | 0.4177498 | 0 | 0.004528613  | 0 | -0.028400601 |
| cov2_7_8_9_10_11 | 33.4347 | -215.475 | 0.4180794 | 0 | 0            | 0 | -0.060784256 |
| cov2_3_5_6_10_11 | 33.4397 | -215.478 | 0.4198962 | 0 | 0            | 0 | -0.037714417 |
| cov2_4_5_6_9_10  | 33.4418 | -215.479 | 0.4176523 | 0 | 0            | 0 | -0.030478719 |
| cov1_2_3_4_8_10  | 33.4437 | -215.48  | 0.418129  | 0 | -0.051648648 | 0 | -0.040236044 |
| cov1_4_6_9_10_11 | 33.4444 | -215.48  | 0.4189891 | 0 | -0.047831181 | 0 | 0            |
| cov1_2_5_6_9_10  | 33.4446 | -215.48  | 0.4178782 | 0 | -0.009023373 | 0 | -0.025131681 |
| cov1_2_3_4_7_10  | 33.4464 | -215.481 | 0.4181292 | 0 | -0.051658297 | 0 | -0.040282945 |
| cov2_4_6_9_10_11 | 33.4654 | -215.491 | 0.4196077 | 0 | 0            | 0 | -0.03324181  |
| cov1_2_3_8_10_11 | 33.4677 | -215.492 | 0.4187889 | 0 | -0.052675368 | 0 | -0.031686957 |
| cov1_2_3_7_10_11 | 33.4707 | -215.493 | 0.4187919 | 0 | -0.052679045 | 0 | -0.031694361 |
| cov1_5_6_9_10_11 | 33.4719 | -215.494 | 0.4180244 | 0 | -0.04026613  | 0 | 0            |
| cov1_2_5_9_10_11 | 33.4734 | -215.495 | 0.4186677 | 0 | -0.049238132 | 0 | -0.027836765 |
| cov1_2_3_4_10_11 | 33.4754 | -215.496 | 0.4188608 | 0 | -0.06021973  | 0 | -0.043485541 |
| cov1_2_3_5_8_10  | 33.4777 | -215.497 | 0.4183144 | 0 | -0.041123599 | 0 | -0.030585749 |
| cov2_4_5_8_10_11 | 33.4799 | -215.498 | 0.4166957 | 0 | 0            | 0 | -0.051311358 |
| cov1_2_3_5_7_10  | 33.481  | -215.499 | 0.4183158 | 0 | -0.041224504 | 0 | -0.030600787 |
| cov1_2_3_7_8_10  | 33.482  | -215.499 | 0.4184096 | 0 | -0.047822305 | 0 | -0.031021555 |
| cov2_4_5_7_10_11 | 33.4825 | -215.499 | 0.4166862 | 0 | 0            | 0 | -0.051314407 |
| cov1_2_4_5_8_10  | 33.4881 | -215.502 | 0.4164415 | 0 | -0.005391574 | 0 | -0.046226187 |
| cov1_2_4_6_9_10  | 33.4894 | -215.503 | 0.418126  | 0 | -0.024960727 | 0 | -0.021025225 |
| cov1_2_6_7_10_11 | 33.4894 | -215.503 | 0.4181647 | 0 | -0.021455711 | 0 | -0.03054214  |

|                  |         |          |           |   |              |   |              |
|------------------|---------|----------|-----------|---|--------------|---|--------------|
| cov2_4_5_7_8_10  | 33.4895 | -215.503 | 0.4164178 | 0 | 0            | 0 | -0.048794867 |
| cov1_2_4_5_7_10  | 33.4905 | -215.503 | 0.4164349 | 0 | -0.005267511 | 0 | -0.046319075 |
| cov1_2_6_8_10_11 | 33.4924 | -215.504 | 0.4181617 | 0 | -0.022156544 | 0 | -0.030542817 |
| cov1_2_3_4_5_10  | 33.4929 | -215.505 | 0.4181145 | 0 | -0.043045282 | 0 | -0.046279752 |
| cov2_4_7_8_9_10  | 33.4965 | -215.506 | 0.4194893 | 0 | 0            | 0 | -0.060391503 |
| cov1_2_6_7_8_10  | 33.5175 | -215.517 | 0.4176264 | 0 | -0.015950855 | 0 | -0.029658863 |
| cov1_2_4_6_7_10  | 33.5176 | -215.517 | 0.4176017 | 0 | -0.015951466 | 0 | -0.030099929 |
| cov1_2_4_6_8_10  | 33.5213 | -215.519 | 0.4176008 | 0 | -0.016617875 | 0 | -0.029995799 |
| cov1_2_4_9_10_11 | 33.5273 | -215.522 | 0.4188596 | 0 | -0.066865063 | 0 | -0.023945363 |
| cov1_3_6_8_10_11 | 33.5296 | -215.523 | 0.4178908 | 0 | -0.047292072 | 0 | 0            |
| cov1_3_6_7_10_11 | 33.5297 | -215.523 | 0.4178879 | 0 | -0.046957692 | 0 | 0            |
| cov2_4_6_7_10_11 | 33.5308 | -215.524 | 0.418264  | 0 | 0            | 0 | -0.03645971  |
| cov2_6_7_8_10_11 | 33.5308 | -215.524 | 0.4182495 | 0 | 0            | 0 | -0.03675043  |
| cov1_2_3_5_10_11 | 33.535  | -215.526 | 0.4193065 | 0 | -0.061082777 | 0 | -0.032279112 |
| cov1_3_5_6_7_10  | 33.5358 | -215.526 | 0.4174336 | 0 | -0.033547226 | 0 | 0            |
| cov1_3_4_6_7_10  | 33.536  | -215.526 | 0.4177818 | 0 | -0.038512316 | 0 | 0            |
| cov1_3_4_6_8_10  | 33.5361 | -215.526 | 0.4177835 | 0 | -0.038874314 | 0 | 0            |
| cov1_3_5_6_8_10  | 33.5361 | -215.526 | 0.4174377 | 0 | -0.034092314 | 0 | 0            |
| cov2_4_6_8_10_11 | 33.5366 | -215.526 | 0.4182732 | 0 | 0            | 0 | -0.03654598  |
| cov2_4_6_7_8_10  | 33.5428 | -215.529 | 0.4178826 | 0 | 0            | 0 | -0.034706018 |
| cov1_3_6_7_8_10  | 33.5441 | -215.53  | 0.4175324 | 0 | -0.042568095 | 0 | 0            |
| cov1_4_5_6_9_10  | 33.5574 | -215.537 | 0.4177203 | 0 | -0.029699521 | 0 | 0            |
| cov4_5_6_9_10_11 | 33.5629 | -215.54  | 0.418456  | 0 | 0            | 0 | 0            |
| cov1_2_5_8_10_11 | 33.5692 | -215.543 | 0.4177377 | 0 | -0.027665681 | 0 | -0.029725995 |
| cov1_2_5_7_10_11 | 33.5726 | -215.544 | 0.4177306 | 0 | -0.02757246  | 0 | -0.029735942 |
| cov1_2_5_7_8_10  | 33.5833 | -215.55  | 0.4173603 | 0 | -0.022524368 | 0 | -0.029063151 |
| cov1_2_4_5_9_10  | 33.5894 | -215.553 | 0.4173113 | 0 | -0.03279782  | 0 | -0.028817357 |
| cov3_5_6_7_10_11 | 33.6031 | -215.56  | 0.4172929 | 0 | 0            | 0 | 0            |
| cov2_3_5_8_10_11 | 33.6038 | -215.56  | 0.4180963 | 0 | 0            | 0 | -0.039465383 |
| cov2_3_5_7_8_10  | 33.6039 | -215.56  | 0.4181248 | 0 | 0            | 0 | -0.039603952 |
| cov3_4_5_6_7_10  | 33.604  | -215.56  | 0.4172685 | 0 | 0            | 0 | 0            |
| cov3_5_6_7_8_10  | 33.6043 | -215.56  | 0.4172046 | 0 | 0            | 0 | 0            |
| cov3_5_6_8_10_11 | 33.6064 | -215.561 | 0.4172963 | 0 | 0            | 0 | 0            |
| cov2_3_5_7_10_11 | 33.6071 | -215.562 | 0.4180903 | 0 | 0            | 0 | -0.039452091 |
| cov3_4_5_6_8_10  | 33.6073 | -215.562 | 0.4172761 | 0 | 0            | 0 | 0            |
| cov1_3_5_6_10_11 | 33.6074 | -215.562 | 0.4183932 | 0 | -0.055556111 | 0 | 0            |
| cov1_5_6_7_10_11 | 33.6083 | -215.562 | 0.4169818 | 0 | -0.020499004 | 0 | 0            |
| cov1_3_4_6_10_11 | 33.6085 | -215.562 | 0.4185248 | 0 | -0.049325908 | 0 | 0            |
| cov2_4_5_9_10_11 | 33.6086 | -215.562 | 0.4178175 | 0 | 0            | 0 | -0.050526875 |
| cov1_5_6_8_10_11 | 33.6111 | -215.564 | 0.4169785 | 0 | -0.021177895 | 0 | 0            |
| cov1_4_5_9_10_11 | 33.6148 | -215.566 | 0.4183027 | 0 | -0.070538022 | 0 | 0            |
| cov1_4_5_6_7_10  | 33.6209 | -215.569 | 0.4167858 | 0 | -0.016222142 | 0 | 0            |
| cov1_5_6_7_8_10  | 33.6221 | -215.569 | 0.4166292 | 0 | -0.015864976 | 0 | 0            |
| cov1_4_5_6_8_10  | 33.624  | -215.57  | 0.4167817 | 0 | -0.016871723 | 0 | 0            |
| cov2_3_4_5_10_11 | 33.6272 | -215.572 | 0.4179977 | 0 | 0            | 0 | -0.066239108 |
| cov1_3_4_5_6_10  | 33.6289 | -215.573 | 0.418287  | 0 | -0.05096481  | 0 | 0            |
| cov2_5_7_8_10_11 | 33.6328 | -215.575 | 0.4176646 | 0 | 0            | 0 | -0.036585516 |

|                  |         |          |           |   |              |   |              |
|------------------|---------|----------|-----------|---|--------------|---|--------------|
| cov4_5_6_7_10_11 | 33.637  | -215.577 | 0.4169707 | 0 | 0            | 0 | 0            |
| cov5_6_7_8_10_11 | 33.6375 | -215.577 | 0.4168839 | 0 | 0            | 0 | 0            |
| cov4_5_6_7_8_10  | 33.6412 | -215.579 | 0.4167821 | 0 | 0            | 0 | 0            |
| cov4_5_6_8_10_11 | 33.6418 | -215.579 | 0.4169688 | 0 | 0            | 0 | 0            |
| cov1_4_6_7_10_11 | 33.6537 | -215.585 | 0.4176483 | 0 | -0.035809443 | 0 | 0            |
| cov1_4_6_8_10_11 | 33.6561 | -215.586 | 0.41765   | 0 | -0.036422989 | 0 | 0            |
| cov1_2_4_8_10_11 | 33.6687 | -215.592 | 0.4176509 | 0 | -0.051719114 | 0 | -0.030547339 |
| cov1_2_7_8_10_11 | 33.6688 | -215.592 | 0.4176162 | 0 | -0.051957338 | 0 | -0.031160737 |
| cov1_4_6_7_8_10  | 33.6709 | -215.594 | 0.4172538 | 0 | -0.031010278 | 0 | 0            |
| cov1_2_4_7_10_11 | 33.6721 | -215.594 | 0.4176427 | 0 | -0.05163601  | 0 | -0.030581829 |
| cov1_2_4_7_8_10  | 33.6856 | -215.601 | 0.4172509 | 0 | -0.046391928 | 0 | -0.02964858  |
| cov1_3_4_8_10_11 | 33.6911 | -215.604 | 0.4177035 | 0 | -0.071899269 | 0 | 0            |
| cov1_3_5_8_10_11 | 33.693  | -215.605 | 0.4172402 | 0 | -0.066131873 | 0 | 0            |
| cov1_3_4_7_10_11 | 33.6944 | -215.605 | 0.4177036 | 0 | -0.071932042 | 0 | 0            |
| cov1_3_4_5_8_10  | 33.695  | -215.606 | 0.4172737 | 0 | -0.063188875 | 0 | 0            |
| cov1_3_5_7_10_11 | 33.6965 | -215.606 | 0.4172419 | 0 | -0.066254997 | 0 | 0            |
| cov1_3_4_7_8_10  | 33.6977 | -215.607 | 0.4174577 | 0 | -0.068272271 | 0 | 0            |
| cov3_4_6_7_10_11 | 33.6981 | -215.607 | 0.418163  | 0 | 0            | 0 | 0            |
| cov1_3_4_5_7_10  | 33.6985 | -215.607 | 0.417276  | 0 | -0.063305765 | 0 | 0            |
| cov3_4_6_7_8_10  | 33.6988 | -215.608 | 0.4182586 | 0 | 0            | 0 | 0            |
| cov1_3_5_7_8_10  | 33.699  | -215.608 | 0.4170145 | 0 | -0.062572921 | 0 | 0            |
| cov3_4_6_8_10_11 | 33.7019 | -215.609 | 0.4181733 | 0 | 0            | 0 | 0            |
| cov1_3_7_8_10_11 | 33.7052 | -215.611 | 0.4173714 | 0 | -0.077711392 | 0 | 0            |
| cov1_6_7_8_10_11 | 33.7107 | -215.613 | 0.4168197 | 0 | -0.044894314 | 0 | 0            |
| cov3_4_5_9_10_11 | 33.7216 | -215.619 | 0.4173442 | 0 | 0            | 0 | 0            |
| cov2_3_4_6_7_9   | 33.7244 | -215.62  | 0.4192766 | 0 | 0            | 0 | -0.050001016 |
| cov2_3_4_6_8_9   | 33.7265 | -215.621 | 0.4192886 | 0 | 0            | 0 | -0.050151092 |
| cov1_2_3_6_7_9   | 33.7584 | -215.637 | 0.4193292 | 0 | -0.017190365 | 0 | -0.031328873 |
| cov1_2_3_6_8_9   | 33.7589 | -215.638 | 0.4193318 | 0 | -0.017636357 | 0 | -0.03132987  |
| cov2_4_5_6_7_9   | 33.764  | -215.64  | 0.4175997 | 0 | 0            | 0 | -0.042973822 |
| cov2_4_5_6_8_9   | 33.7678 | -215.642 | 0.4175976 | 0 | 0            | 0 | -0.043119057 |
| cov1_3_4_5_10_11 | 33.768  | -215.642 | 0.4182852 | 0 | -0.08379353  | 0 | 0            |
| cov1_4_5_8_10_11 | 33.7744 | -215.645 | 0.4167015 | 0 | -0.049266638 | 0 | 0            |
| cov2_3_6_7_9_11  | 33.7748 | -215.645 | 0.4199537 | 0 | 0            | 0 | -0.038925295 |
| cov2_3_6_8_9_11  | 33.7769 | -215.647 | 0.4199641 | 0 | 0            | 0 | -0.039075306 |
| cov1_4_5_7_10_11 | 33.778  | -215.647 | 0.4166923 | 0 | -0.04917889  | 0 | 0            |
| cov1_5_7_8_10_11 | 33.778  | -215.647 | 0.4164513 | 0 | -0.048509035 | 0 | 0            |
| cov4_6_7_8_10_11 | 33.7811 | -215.649 | 0.4177624 | 0 | 0            | 0 | 0            |
| cov1_4_5_7_8_10  | 33.7812 | -215.649 | 0.4164438 | 0 | -0.045294911 | 0 | 0            |
| cov3_6_7_8_10_11 | 33.783  | -215.65  | 0.4172638 | 0 | 0            | 0 | 0            |
| cov2_3_5_6_7_9   | 33.7834 | -215.65  | 0.4194307 | 0 | 0            | 0 | -0.03530516  |
| cov2_3_5_6_8_9   | 33.7853 | -215.651 | 0.4194381 | 0 | 0            | 0 | -0.035436762 |
| cov2_3_6_7_8_9   | 33.7879 | -215.652 | 0.4195617 | 0 | 0            | 0 | -0.037147972 |
| cov1_2_3_4_6_9   | 33.7939 | -215.655 | 0.4192394 | 0 | -0.024986836 | 0 | -0.047752159 |
| cov3_4_5_6_10_11 | 33.8142 | -215.665 | 0.4182469 | 0 | 0            | 0 | 0            |
| cov1_4_7_8_10_11 | 33.8256 | -215.671 | 0.4171976 | 0 | -0.06490113  | 0 | 0            |
| cov2_5_6_7_9_11  | 33.8256 | -215.671 | 0.4191121 | 0 | 0            | 0 | -0.033321814 |



|                  |         |          |           |   |              |   |              |
|------------------|---------|----------|-----------|---|--------------|---|--------------|
| cov2_3_4_6_9_11  | 33.8276 | -215.672 | 0.4201899 | 0 | 0            | 0 | -0.056739577 |
| cov2_5_6_8_9_11  | 33.8294 | -215.673 | 0.4191111 | 0 | 0            | 0 | -0.033447736 |
| cov2_3_4_5_6_9   | 33.8345 | -215.675 | 0.419246  | 0 | 0            | 0 | -0.055441213 |
| cov1_2_6_7_9_11  | 33.8359 | -215.676 | 0.4190226 | 0 | -0.021849737 | 0 | -0.0317459   |
| cov1_2_6_8_9_11  | 33.8388 | -215.678 | 0.4190192 | 0 | -0.022556988 | 0 | -0.031747163 |
| cov1_2_5_6_7_9   | 33.8488 | -215.683 | 0.418503  | 0 | -0.005425892 | 0 | -0.030246903 |
| cov2_5_6_7_8_9   | 33.8506 | -215.683 | 0.4185677 | 0 | 0            | 0 | -0.031393096 |
| cov1_2_5_6_8_9   | 33.8522 | -215.684 | 0.4184956 | 0 | -0.006092802 | 0 | -0.030237741 |
| cov1_2_4_6_7_9   | 33.8586 | -215.687 | 0.4181946 | 0 | -0.016942539 | 0 | -0.035102528 |
| cov1_2_3_5_6_9   | 33.8587 | -215.687 | 0.4199664 | 0 | -0.039710001 | 0 | -0.032677549 |
| cov1_2_3_6_9_11  | 33.8595 | -215.688 | 0.42055   | 0 | -0.028111395 | 0 | -0.032669657 |
| cov1_2_4_6_8_9   | 33.8625 | -215.689 | 0.4181895 | 0 | -0.017629194 | 0 | -0.035009581 |
| cov1_2_6_7_8_9   | 33.8694 | -215.693 | 0.4184413 | 0 | -0.015850864 | 0 | -0.030791064 |
| cov2_4_6_7_9_11  | 33.8714 | -215.694 | 0.418913  | 0 | 0            | 0 | -0.041932756 |
| cov2_4_6_8_9_11  | 33.8777 | -215.697 | 0.4189183 | 0 | 0            | 0 | -0.042021128 |
| cov2_6_7_8_9_11  | 33.8788 | -215.698 | 0.4191014 | 0 | 0            | 0 | -0.038068827 |
| cov1_2_3_4_8_9   | 33.8815 | -215.699 | 0.4185433 | 0 | -0.054668276 | 0 | -0.043942422 |
| cov1_2_3_4_7_9   | 33.8851 | -215.701 | 0.4185432 | 0 | -0.054667877 | 0 | -0.043988989 |
| cov2_4_6_7_8_9   | 33.8869 | -215.702 | 0.4184841 | 0 | 0            | 0 | -0.03996829  |
| cov1_2_3_8_9_11  | 33.9257 | -215.721 | 0.4193117 | 0 | -0.05517242  | 0 | -0.032964691 |
| cov2_3_4_8_10_11 | 33.9268 | -215.722 | 0.4182386 | 0 | 0            | 0 | -0.061710702 |
| cov2_3_7_8_10_11 | 33.9271 | -215.722 | 0.4182682 | 0 | 0            | 0 | -0.060652332 |
| cov2_3_4_7_10_11 | 33.9295 | -215.723 | 0.4182352 | 0 | 0            | 0 | -0.06172393  |
| cov1_2_3_7_9_11  | 33.9297 | -215.723 | 0.4193124 | 0 | -0.055156454 | 0 | -0.032973879 |
| cov2_3_5_6_9_11  | 33.9301 | -215.723 | 0.4207144 | 0 | 0            | 0 | -0.041795692 |
| cov1_2_3_5_8_9   | 33.9432 | -215.73  | 0.4189359 | 0 | -0.053645079 | 0 | -0.032472424 |
| cov3_4_8_9_10_11 | 33.9433 | -215.73  | 0.4176004 | 0 | 0            | 0 | 0            |
| cov2_3_4_5_8_9   | 33.9437 | -215.73  | 0.4175709 | 0 | 0            | 0 | -0.062580368 |
| cov1_2_3_7_8_9   | 33.9445 | -215.73  | 0.4188864 | 0 | -0.049681662 | 0 | -0.032220342 |
| cov1_2_3_4_9_11  | 33.9449 | -215.731 | 0.4194273 | 0 | -0.065012234 | 0 | -0.048159481 |
| cov3_4_7_9_10_11 | 33.946  | -215.731 | 0.4175917 | 0 | 0            | 0 | 0            |
| cov1_2_3_5_7_9   | 33.947  | -215.732 | 0.4189378 | 0 | -0.053753702 | 0 | -0.032489891 |
| cov2_3_4_5_7_9   | 33.9473 | -215.732 | 0.4175626 | 0 | 0            | 0 | -0.062574617 |
| cov1_2_4_5_8_9   | 33.9543 | -215.735 | 0.4171945 | 0 | -0.020163126 | 0 | -0.046943116 |
| cov1_2_4_5_7_9   | 33.9576 | -215.737 | 0.4171872 | 0 | -0.020044206 | 0 | -0.047030171 |
| cov4_7_8_9_10_11 | 33.963  | -215.74  | 0.4174374 | 0 | 0            | 0 | 0            |
| cov1_3_6_7_9_11  | 33.9736 | -215.745 | 0.4184658 | 0 | -0.047720423 | 0 | 0            |
| cov1_3_6_8_9_11  | 33.9739 | -215.745 | 0.4184703 | 0 | -0.048163981 | 0 | 0            |
| cov2_4_5_8_9_11  | 33.9791 | -215.748 | 0.4172949 | 0 | 0            | 0 | -0.058438257 |
| cov2_4_5_7_9_11  | 33.9822 | -215.749 | 0.4172848 | 0 | 0            | 0 | -0.058441603 |
| cov2_4_5_7_8_9   | 33.9843 | -215.75  | 0.417087  | 0 | 0            | 0 | -0.056573693 |
| cov1_2_3_4_5_9   | 33.9878 | -215.752 | 0.418858  | 0 | -0.058288146 | 0 | -0.046760173 |
| cov1_3_4_6_7_9   | 33.99   | -215.753 | 0.418207  | 0 | -0.040180177 | 0 | 0            |
| cov1_3_4_6_8_9   | 33.9905 | -215.753 | 0.418209  | 0 | -0.040646399 | 0 | 0            |
| cov1_3_5_6_7_9   | 33.9925 | -215.754 | 0.4180869 | 0 | -0.044631859 | 0 | 0            |
| cov1_3_6_7_8_9   | 33.9926 | -215.754 | 0.4180912 | 0 | -0.042712966 | 0 | 0            |
| cov1_3_5_6_8_9   | 33.9929 | -215.755 | 0.4180937 | 0 | -0.045235586 | 0 | 0            |

|                  |         |          |           |   |              |   |              |
|------------------|---------|----------|-----------|---|--------------|---|--------------|
| cov2_3_4_7_8_10  | 33.9955 | -215.756 | 0.4191222 | 0 | 0            | 0 | -0.068289163 |
| cov1_2_3_5_9_11  | 34.0071 | -215.762 | 0.4200302 | 0 | -0.075681267 | 0 | -0.034369275 |
| cov3_5_7_8_10_11 | 34.016  | -215.766 | 0.4156391 | 0 | 0            | 0 | 0            |
| cov4_5_7_8_10_11 | 34.0161 | -215.766 | 0.4156558 | 0 | 0            | 0 | 0            |
| cov3_4_5_8_10_11 | 34.0166 | -215.766 | 0.4156538 | 0 | 0            | 0 | 0            |
| cov1_2_5_8_9_11  | 34.0169 | -215.767 | 0.4184675 | 0 | -0.041884489 | 0 | -0.031777521 |
| cov1_2_3_4_6_7   | 34.0177 | -215.767 | 0.420504  | 0 | -0.024616378 | 0 | -0.05096845  |
| cov1_2_3_4_6_8   | 34.0189 | -215.768 | 0.4205113 | 0 | -0.025159209 | 0 | -0.050999308 |
| cov3_4_5_7_10_11 | 34.0192 | -215.768 | 0.4156418 | 0 | 0            | 0 | 0            |
| cov1_2_5_7_9_11  | 34.0212 | -215.769 | 0.4184598 | 0 | -0.041796854 | 0 | -0.031789162 |
| cov1_2_5_7_8_9   | 34.0361 | -215.776 | 0.418036  | 0 | -0.035994186 | 0 | -0.031017983 |
| cov1_2_4_8_9_11  | 34.0387 | -215.777 | 0.4182259 | 0 | -0.056125722 | 0 | -0.035652168 |
| cov3_4_5_7_8_10  | 34.042  | -215.779 | 0.4159526 | 0 | 0            | 0 | 0            |
| cov1_2_4_7_9_11  | 34.0428 | -215.78  | 0.4182171 | 0 | -0.056040654 | 0 | -0.035687246 |
| cov1_2_7_8_9_11  | 34.0446 | -215.78  | 0.4184008 | 0 | -0.054687533 | 0 | -0.032455479 |
| cov1_4_6_7_9_11  | 34.0472 | -215.782 | 0.418231  | 0 | -0.039804395 | 0 | 0            |
| cov1_5_6_7_9_11  | 34.0474 | -215.782 | 0.4177406 | 0 | -0.033490763 | 0 | 0            |
| cov1_4_6_8_9_11  | 34.0496 | -215.783 | 0.418231  | 0 | -0.040432179 | 0 | 0            |
| cov1_5_6_8_9_11  | 34.0501 | -215.783 | 0.4177395 | 0 | -0.034183349 | 0 | 0            |
| cov2_3_4_5_6_7   | 34.0586 | -215.787 | 0.4205862 | 0 | 0            | 0 | -0.05821075  |
| cov1_2_4_7_8_9   | 34.0601 | -215.788 | 0.4177827 | 0 | -0.050157974 | 0 | -0.034674856 |
| cov2_3_4_6_7_11  | 34.0607 | -215.788 | 0.4213428 | 0 | 0            | 0 | -0.059427631 |
| cov1_4_5_6_7_9   | 34.0615 | -215.789 | 0.4176234 | 0 | -0.028857455 | 0 | 0            |
| cov2_3_4_5_6_8   | 34.0623 | -215.789 | 0.4206047 | 0 | 0            | 0 | -0.058446741 |
| cov1_4_5_6_8_9   | 34.0645 | -215.79  | 0.4176218 | 0 | -0.029519075 | 0 | 0            |
| cov2_3_4_6_8_11  | 34.0647 | -215.79  | 0.4213623 | 0 | 0            | 0 | -0.059647421 |
| cov1_5_6_7_8_9   | 34.0665 | -215.791 | 0.4173363 | 0 | -0.028065468 | 0 | 0            |
| cov1_4_6_7_8_9   | 34.0683 | -215.792 | 0.4177988 | 0 | -0.034506927 | 0 | 0            |
| cov1_3_5_6_9_11  | 34.0721 | -215.794 | 0.4191476 | 0 | -0.068921921 | 0 | 0            |
| cov1_2_4_6_7_11  | 34.0725 | -215.794 | 0.4203523 | 0 | -0.027938645 | 0 | -0.044485184 |
| cov1_6_7_8_9_11  | 34.0751 | -215.796 | 0.4176589 | 0 | -0.046257655 | 0 | 0            |
| cov1_2_4_6_8_11  | 34.076  | -215.796 | 0.4203548 | 0 | -0.028685975 | 0 | -0.044405772 |
| cov2_3_4_6_7_8   | 34.0769 | -215.797 | 0.4209188 | 0 | 0            | 0 | -0.057558765 |
| cov2_4_5_6_10_11 | 34.081  | -215.799 | 0.4178027 | 0 | 0            | 0 | -0.038163919 |
| cov2_4_5_6_7_11  | 34.0815 | -215.799 | 0.4203836 | 0 | 0            | 0 | -0.055535677 |
| cov1_2_5_6_10_11 | 34.0852 | -215.801 | 0.4181644 | 0 | -0.015806702 | 0 | -0.029476099 |
| cov2_4_5_6_8_11  | 34.0874 | -215.802 | 0.4203849 | 0 | 0            | 0 | -0.055703345 |
| cov2_4_7_8_10_11 | 34.0883 | -215.802 | 0.417536  | 0 | 0            | 0 | -0.051424935 |
| cov1_2_3_5_6_7   | 34.0916 | -215.804 | 0.4213159 | 0 | -0.044638681 | 0 | -0.033871992 |
| cov1_2_3_5_6_8   | 34.0919 | -215.804 | 0.4213227 | 0 | -0.045214258 | 0 | -0.033883909 |
| cov1_3_4_5_6_9   | 34.0945 | -215.805 | 0.4191214 | 0 | -0.063846308 | 0 | 0            |
| cov1_2_4_5_6_7   | 34.1061 | -215.811 | 0.4196942 | 0 | -0.012163976 | 0 | -0.047534081 |
| cov1_2_4_5_6_8   | 34.1107 | -215.813 | 0.4196831 | 0 | -0.013149365 | 0 | -0.047328987 |
| cov3_4_5_6_7_9   | 34.1113 | -215.814 | 0.4179306 | 0 | 0            | 0 | 0            |
| cov3_5_6_7_9_11  | 34.1122 | -215.814 | 0.4178402 | 0 | 0            | 0 | 0            |
| cov1_3_4_6_9_11  | 34.1128 | -215.815 | 0.419092  | 0 | -0.053359112 | 0 | 0            |
| cov3_5_6_7_8_9   | 34.1131 | -215.815 | 0.417766  | 0 | 0            | 0 | 0            |

|                  |         |          |           |   |              |   |              |
|------------------|---------|----------|-----------|---|--------------|---|--------------|
| cov2_4_5_6_7_8   | 34.1148 | -215.816 | 0.419814  | 0 | 0            | 0 | -0.052192683 |
| cov3_4_5_6_8_9   | 34.1162 | -215.816 | 0.417941  | 0 | 0            | 0 | 0            |
| cov1_2_4_6_7_8   | 34.1171 | -215.817 | 0.4197391 | 0 | -0.020975906 | 0 | -0.043173299 |
| cov3_5_6_8_9_11  | 34.1172 | -215.817 | 0.417844  | 0 | 0            | 0 | 0            |
| cov4_5_6_7_9_11  | 34.1235 | -215.82  | 0.4177624 | 0 | 0            | 0 | 0            |
| cov5_6_7_8_9_11  | 34.1256 | -215.821 | 0.4175832 | 0 | 0            | 0 | 0            |
| cov4_5_6_7_8_9   | 34.1259 | -215.821 | 0.4176217 | 0 | 0            | 0 | 0            |
| cov4_5_6_8_9_11  | 34.1296 | -215.823 | 0.4177605 | 0 | 0            | 0 | 0            |
| cov1_2_5_6_7_11  | 34.1368 | -215.827 | 0.4210331 | 0 | -0.03433578  | 0 | -0.033502019 |
| cov1_2_4_6_10_11 | 34.1374 | -215.827 | 0.4183341 | 0 | -0.032325925 | 0 | -0.026199523 |
| cov1_2_5_6_8_11  | 34.1393 | -215.828 | 0.4210346 | 0 | -0.035028016 | 0 | -0.033495699 |
| cov1_2_3_5_6_11  | 34.1408 | -215.829 | 0.4226524 | 0 | -0.069607354 | 0 | -0.03619406  |
| cov2_4_6_7_8_11  | 34.1421 | -215.829 | 0.4206087 | 0 | 0            | 0 | -0.051529142 |
| cov1_2_3_6_7_11  | 34.1456 | -215.831 | 0.4219207 | 0 | -0.025445949 | 0 | -0.033424162 |
| cov1_2_3_6_8_11  | 34.1468 | -215.832 | 0.4219311 | 0 | -0.026092842 | 0 | -0.033433204 |
| cov1_2_3_4_6_11  | 34.1527 | -215.834 | 0.4220311 | 0 | -0.039861913 | 0 | -0.058255011 |
| cov2_3_5_8_9_11  | 34.1548 | -215.835 | 0.4185661 | 0 | 0            | 0 | -0.043863786 |
| cov2_3_5_7_8_9   | 34.1554 | -215.836 | 0.4186344 | 0 | 0            | 0 | -0.044221589 |
| cov2_3_5_7_9_11  | 34.1586 | -215.837 | 0.4185558 | 0 | 0            | 0 | -0.043845188 |
| cov1_2_6_7_8_11  | 34.1608 | -215.839 | 0.4214192 | 0 | -0.024969036 | 0 | -0.033141628 |
| cov2_5_7_8_9_11  | 34.1629 | -215.84  | 0.4183344 | 0 | 0            | 0 | -0.042298016 |
| cov3_4_6_7_9_11  | 34.1665 | -215.841 | 0.4186237 | 0 | 0            | 0 | 0            |
| cov3_4_6_7_8_9   | 34.1666 | -215.841 | 0.4186852 | 0 | 0            | 0 | 0            |
| cov1_2_3_4_5_6   | 34.1673 | -215.842 | 0.4214266 | 0 | -0.053221315 | 0 | -0.047011379 |
| cov3_4_6_8_9_11  | 34.1717 | -215.844 | 0.4186351 | 0 | 0            | 0 | 0            |
| cov1_3_4_8_9_11  | 34.1759 | -215.846 | 0.4181044 | 0 | -0.077017301 | 0 | 0            |
| cov1_2_5_6_7_8   | 34.1789 | -215.848 | 0.4204226 | 0 | -0.027433043 | 0 | -0.032435179 |
| cov1_3_4_7_9_11  | 34.1801 | -215.848 | 0.4181021 | 0 | -0.077029143 | 0 | 0            |
| cov1_3_4_5_8_9   | 34.1826 | -215.849 | 0.4179887 | 0 | -0.077672199 | 0 | 0            |
| cov1_3_7_8_9_11  | 34.1832 | -215.85  | 0.4178708 | 0 | -0.081279475 | 0 | 0            |
| cov1_3_5_8_9_11  | 34.1839 | -215.85  | 0.4178598 | 0 | -0.080993605 | 0 | 0            |
| cov1_3_4_7_8_9   | 34.1854 | -215.851 | 0.4178198 | 0 | -0.072784374 | 0 | 0            |
| cov1_2_3_6_7_8   | 34.1864 | -215.851 | 0.4213093 | 0 | -0.01888839  | 0 | -0.032385105 |
| cov1_3_4_5_7_9   | 34.1867 | -215.851 | 0.4179938 | 0 | -0.077803526 | 0 | 0            |
| cov1_3_5_7_9_11  | 34.188  | -215.852 | 0.4178613 | 0 | -0.081135327 | 0 | 0            |
| cov1_3_5_7_8_9   | 34.1928 | -215.855 | 0.4175884 | 0 | -0.076686702 | 0 | 0            |
| cov2_3_5_6_7_11  | 34.1952 | -215.856 | 0.4220587 | 0 | 0            | 0 | -0.042916736 |
| cov2_3_5_6_8_11  | 34.1996 | -215.858 | 0.4220833 | 0 | 0            | 0 | -0.043116961 |
| cov2_3_6_7_8_11  | 34.2037 | -215.86  | 0.4220254 | 0 | 0            | 0 | -0.040799664 |
| cov4_6_7_8_9_11  | 34.2042 | -215.86  | 0.418348  | 0 | 0            | 0 | 0            |
| cov2_3_5_6_7_8   | 34.2082 | -215.862 | 0.4216968 | 0 | 0            | 0 | -0.041674741 |
| cov2_5_6_7_8_11  | 34.2163 | -215.866 | 0.4215381 | 0 | 0            | 0 | -0.040670447 |
| cov1_2_4_5_10_11 | 34.2342 | -215.875 | 0.4174175 | 0 | -0.03772838  | 0 | -0.034644755 |
| cov3_6_7_8_9_11  | 34.235  | -215.876 | 0.4178333 | 0 | 0            | 0 | 0            |
| cov2_3_4_5_9_11  | 34.2392 | -215.878 | 0.418561  | 0 | 0            | 0 | -0.073006166 |
| cov1_4_5_6_10_11 | 34.2461 | -215.881 | 0.4177529 | 0 | -0.03825079  | 0 | 0            |
| cov1_4_5_8_9_11  | 34.2462 | -215.881 | 0.4175261 | 0 | -0.065687318 | 0 | 0            |

|                 |         |          |           |   |              |   |              |
|-----------------|---------|----------|-----------|---|--------------|---|--------------|
| cov1_2_4_5_6_10 | 34.2479 | -215.882 | 0.4165539 | 0 | 0.000769789  | 0 | -0.030458871 |
| cov1_4_5_7_9_11 | 34.2507 | -215.883 | 0.417517  | 0 | -0.065610724 | 0 | 0            |
| cov1_4_7_8_9_11 | 34.2537 | -215.885 | 0.4177122 | 0 | -0.071623086 | 0 | 0            |
| cov1_5_7_8_9_11 | 34.256  | -215.886 | 0.4171277 | 0 | -0.064554689 | 0 | 0            |
| cov1_4_5_7_8_9  | 34.2566 | -215.886 | 0.4172172 | 0 | -0.060896126 | 0 | 0            |
| cov1_3_4_5_9_11 | 34.2622 | -215.889 | 0.4191001 | 0 | -0.1002973   | 0 | 0            |
| cov1_2_3_4_8_11 | 34.2861 | -215.901 | 0.4206942 | 0 | -0.072507248 | 0 | -0.052443542 |
| cov1_2_3_4_7_11 | 34.2919 | -215.904 | 0.4206971 | 0 | -0.07253331  | 0 | -0.05251868  |
| cov2_3_4_5_6_11 | 34.2966 | -215.906 | 0.4224193 | 0 | 0            | 0 | -0.068568925 |
| cov1_2_3_4_5_8  | 34.3095 | -215.913 | 0.4203143 | 0 | -0.072377772 | 0 | -0.049097189 |
| cov1_2_3_4_7_8  | 34.3138 | -215.915 | 0.4202038 | 0 | -0.065860981 | 0 | -0.051386775 |
| cov1_2_3_4_5_7  | 34.315  | -215.916 | 0.42032   | 0 | -0.07257211  | 0 | -0.04910947  |
| cov1_3_5_6_7_11 | 34.3365 | -215.926 | 0.4204746 | 0 | -0.075028471 | 0 | 0            |
| cov1_3_5_6_8_11 | 34.3366 | -215.926 | 0.4204825 | 0 | -0.075623917 | 0 | 0            |
| cov1_2_3_5_8_11 | 34.3457 | -215.931 | 0.4214387 | 0 | -0.091675295 | 0 | -0.035976156 |
| cov1_3_4_5_6_7  | 34.3469 | -215.932 | 0.4204995 | 0 | -0.070169159 | 0 | 0            |
| cov1_3_4_5_6_8  | 34.347  | -215.932 | 0.4205065 | 0 | -0.07076533  | 0 | 0            |
| cov1_2_3_5_7_11 | 34.3509 | -215.934 | 0.4214489 | 0 | -0.091970648 | 0 | -0.036006748 |
| cov1_3_5_6_7_8  | 34.3637 | -215.94  | 0.4200193 | 0 | -0.068846603 | 0 | 0            |
| cov3_4_7_8_9_10 | 34.3674 | -215.942 | 0.4193629 | 0 | 0            | 0 | 0            |
| cov1_2_4_5_8_11 | 34.3692 | -215.943 | 0.419929  | 0 | -0.061875499 | 0 | -0.048355284 |
| cov1_2_3_5_7_8  | 34.371  | -215.944 | 0.4209614 | 0 | -0.085292195 | 0 | -0.035109741 |
| cov1_2_4_5_7_11 | 34.3753 | -215.946 | 0.4199298 | 0 | -0.061842735 | 0 | -0.048409628 |
| cov1_2_4_7_8_11 | 34.3758 | -215.946 | 0.4199592 | 0 | -0.068177577 | 0 | -0.045036007 |
| cov1_4_5_6_7_11 | 34.3867 | -215.951 | 0.4202195 | 0 | -0.060302945 | 0 | 0            |
| cov3_4_5_6_9_11 | 34.3871 | -215.952 | 0.4190228 | 0 | 0            | 0 | 0            |
| cov1_4_5_6_8_11 | 34.3888 | -215.952 | 0.4202202 | 0 | -0.060982414 | 0 | 0            |
| cov1_2_4_5_7_8  | 34.3968 | -215.957 | 0.4194447 | 0 | -0.055285773 | 0 | -0.047299285 |
| cov1_2_3_4_5_11 | 34.4028 | -215.96  | 0.4217283 | 0 | -0.10153457  | 0 | -0.048604881 |
| cov1_5_6_7_8_11 | 34.4028 | -215.959 | 0.4197495 | 0 | -0.059100057 | 0 | 0            |
| cov1_3_4_6_7_11 | 34.4086 | -215.962 | 0.4203804 | 0 | -0.052944159 | 0 | 0            |
| cov1_3_4_6_8_11 | 34.4098 | -215.963 | 0.4203895 | 0 | -0.053620016 | 0 | 0            |
| cov1_3_6_7_8_11 | 34.4102 | -215.963 | 0.4205776 | 0 | -0.051265496 | 0 | 0            |
| cov1_4_5_6_7_8  | 34.4152 | -215.966 | 0.4197328 | 0 | -0.053920668 | 0 | 0            |
| cov1_3_4_5_6_11 | 34.4154 | -215.966 | 0.4218393 | 0 | -0.096255855 | 0 | 0            |
| cov1_4_6_7_8_11 | 34.4219 | -215.969 | 0.4201188 | 0 | -0.05036782  | 0 | 0            |
| cov2_3_4_8_9_11 | 34.4226 | -215.969 | 0.4186085 | 0 | 0            | 0 | -0.06665895  |
| cov2_3_4_7_9_11 | 34.4258 | -215.971 | 0.4186025 | 0 | 0            | 0 | -0.066657966 |
| cov2_3_7_8_9_11 | 34.4265 | -215.971 | 0.4186961 | 0 | 0            | 0 | -0.063172247 |
| cov1_2_5_7_8_11 | 34.4301 | -215.973 | 0.420563  | 0 | -0.07452821  | 0 | -0.034552121 |
| cov1_3_4_6_7_8  | 34.4344 | -215.975 | 0.4199228 | 0 | -0.047228412 | 0 | 0            |
| cov1_2_3_7_8_11 | 34.4431 | -215.98  | 0.4214242 | 0 | -0.065495054 | 0 | -0.034449141 |
| cov2_3_4_7_8_9  | 34.4924 | -216.004 | 0.4194693 | 0 | 0            | 0 | -0.073170502 |
| cov1_2_5_6_9_11 | 34.5101 | -216.013 | 0.4189431 | 0 | -0.02730667  | 0 | -0.031441412 |
| cov1_2_4_6_9_11 | 34.5199 | -216.018 | 0.4189438 | 0 | -0.034272083 | 0 | -0.031232633 |
| cov2_4_7_8_9_11 | 34.5292 | -216.023 | 0.4180325 | 0 | 0            | 0 | -0.058156472 |
| cov2_4_5_6_9_11 | 34.5329 | -216.025 | 0.4185837 | 0 | 0            | 0 | -0.042818264 |

|                    |         |          |           |   |              |              |
|--------------------|---------|----------|-----------|---|--------------|--------------|
| cov3_4_7_8_10_11   | 34.6112 | -216.064 | 0.416691  | 0 | 0            | 0            |
| cov1_3_4_5_8_11    | 34.6228 | -216.07  | 0.4205758 | 0 | -0.11812637  | 0            |
| cov1_3_4_5_7_11    | 34.6282 | -216.072 | 0.4205888 | 0 | -0.11845998  | 0            |
| cov1_3_4_5_7_8     | 34.6369 | -216.077 | 0.4202307 | 0 | -0.11282524  | 0            |
| cov1_3_5_7_8_11    | 34.6501 | -216.083 | 0.4199675 | 0 | -0.11704485  | 0            |
| cov3_5_7_8_9_11    | 34.6659 | -216.091 | 0.4158425 | 0 | 0            | 0            |
| cov3_4_5_8_9_11    | 34.666  | -216.091 | 0.4159701 | 0 | 0            | 0            |
| cov3_4_5_7_9_11    | 34.6687 | -216.092 | 0.4159539 | 0 | 0            | 0            |
| cov3_4_5_6_7_8     | 34.6725 | -216.094 | 0.4204507 | 0 | 0            | 0            |
| cov3_4_5_6_7_11    | 34.6727 | -216.094 | 0.4204298 | 0 | 0            | 0            |
| cov4_5_6_7_8_11    | 34.6734 | -216.095 | 0.42052   | 0 | 0            | 0            |
| cov4_5_7_8_9_11    | 34.6784 | -216.097 | 0.4161173 | 0 | 0            | 0            |
| cov3_5_6_7_8_11    | 34.6787 | -216.097 | 0.4201359 | 0 | 0            | 0            |
| cov3_4_6_7_8_11    | 34.6789 | -216.098 | 0.4205839 | 0 | 0            | 0            |
| cov3_4_5_6_8_11    | 34.6825 | -216.099 | 0.4204597 | 0 | 0            | 0            |
| cov1_4_5_6_9_11    | 34.6827 | -216.099 | 0.4186169 | 0 | -0.051664469 | 0            |
| cov2_4_5_7_8_11    | 34.6864 | -216.101 | 0.4199976 | 0 | 0            | -0.079682624 |
| cov2_3_4_5_8_11    | 34.6868 | -216.101 | 0.4200011 | 0 | 0            | -0.079662414 |
| cov1_4_5_7_8_11    | 34.6877 | -216.102 | 0.4198378 | 0 | -0.10211133  | 0            |
| cov2_3_4_5_7_8     | 34.6879 | -216.102 | 0.4200971 | 0 | 0            | -0.080477682 |
| cov2_3_4_5_7_11    | 34.6923 | -216.104 | 0.419989  | 0 | 0            | -0.079637316 |
| cov1_2_4_5_6_9     | 34.6975 | -216.107 | 0.4173415 | 0 | -0.011373328 | -0.031007148 |
| cov1_2_4_5_9_11    | 34.6989 | -216.108 | 0.418191  | 0 | -0.053254324 | -0.035419057 |
| cov3_4_5_7_8_9     | 34.7025 | -216.109 | 0.4163131 | 0 | 0            | 0            |
| cov1_3_4_7_8_11    | 34.7246 | -216.12  | 0.4199477 | 0 | -0.093908588 | 0            |
| cov3_7_8_9_10_11   | 34.8232 | -216.17  | 0.4134514 | 0 | 0            | 0            |
| cov1_2_4_5_6_11    | 34.8583 | -216.187 | 0.4208118 | 0 | -0.049197786 | -0.036097061 |
| cov2_3_5_7_8_11    | 34.9956 | -216.256 | 0.4211843 | 0 | 0            | -0.056862626 |
| cov2_3_4_7_8_11    | 35.1342 | -216.325 | 0.420763  | 0 | 0            | -0.082274371 |
| cov3_4_7_8_9_11    | 35.2216 | -216.369 | 0.4169277 | 0 | 0            | 0            |
| cov3_4_5_7_8_11    | 35.8958 | -216.706 | 0.4186328 | 0 | 0            | 0            |
| cov1_2_3_4_6_9_10  | 39.5242 | -214.998 | 0.4199209 | 0 | -0.029766209 | -0.042227912 |
| cov1_2_3_6_8_9_10  | 39.5328 | -215.002 | 0.4200571 | 0 | -0.023676717 | -0.028097893 |
| cov1_2_3_6_7_9_10  | 39.5329 | -215.002 | 0.420056  | 0 | -0.023352586 | -0.028097933 |
| cov2_3_4_6_7_9_10  | 39.54   | -215.006 | 0.4201278 | 0 | 0            | -0.047109217 |
| cov2_3_4_6_8_9_10  | 39.5414 | -215.006 | 0.4201367 | 0 | 0            | -0.047223774 |
| cov2_3_4_5_6_9_10  | 39.5426 | -215.007 | 0.4196963 | 0 | 0            | -0.051866159 |
| cov2_3_5_6_7_9_10  | 39.5606 | -215.016 | 0.4200532 | 0 | 0            | -0.031535374 |
| cov2_3_5_6_8_9_10  | 39.5618 | -215.017 | 0.4200601 | 0 | 0            | -0.031645037 |
| cov2_4_5_6_7_9_10  | 39.5769 | -215.024 | 0.4179532 | 0 | 0            | -0.038575029 |
| cov2_4_5_6_8_9_10  | 39.5802 | -215.026 | 0.4179507 | 0 | 0            | -0.038718687 |
| cov2_3_6_7_9_10_11 | 39.5842 | -215.028 | 0.4205619 | 0 | 0            | -0.036857989 |
| cov1_2_3_6_9_10_11 | 39.5854 | -215.028 | 0.4209642 | 0 | -0.03153181  | -0.029044301 |
| cov2_3_6_8_9_10_11 | 39.5857 | -215.029 | 0.4205696 | 0 | 0            | -0.036974952 |
| cov2_3_6_7_8_9_10  | 39.5872 | -215.029 | 0.4203722 | 0 | 0            | -0.035996449 |
| cov1_2_3_5_6_9_10  | 39.6026 | -215.037 | 0.4204932 | 0 | -0.036011652 | -0.02878687  |
| cov2_3_4_6_9_10_11 | 39.6029 | -215.037 | 0.4207119 | 0 | 0            | -0.051641987 |

|                    |         |          |           |   |              |   |              |
|--------------------|---------|----------|-----------|---|--------------|---|--------------|
| cov2_5_6_7_9_10_11 | 39.6538 | -215.063 | 0.4193785 | 0 | 0            | 0 | -0.028165778 |
| cov2_5_6_8_9_10_11 | 39.6571 | -215.064 | 0.419377  | 0 | 0            | 0 | -0.028288516 |
| cov1_2_3_4_8_9_10  | 39.6606 | -215.066 | 0.4193174 | 0 | -0.059556004 | 0 | -0.039498682 |
| cov1_2_3_4_7_9_10  | 39.6634 | -215.067 | 0.4193196 | 0 | -0.059574768 | 0 | -0.039552201 |
| cov2_5_6_7_8_9_10  | 39.669  | -215.07  | 0.4189479 | 0 | 0            | 0 | -0.026644847 |
| cov1_2_5_6_7_9_10  | 39.6692 | -215.07  | 0.4189324 | 0 | -0.001287168 | 0 | -0.026353713 |
| cov2_3_5_6_9_10_11 | 39.6707 | -215.071 | 0.4210712 | 0 | 0            | 0 | -0.036720634 |
| cov1_2_5_6_8_9_10  | 39.6724 | -215.072 | 0.4189177 | 0 | -0.001940938 | 0 | -0.026343088 |
| cov2_3_4_5_8_9_10  | 39.679  | -215.075 | 0.4181806 | 0 | 0            | 0 | -0.059264733 |
| cov2_3_4_5_7_9_10  | 39.6826 | -215.077 | 0.4181652 | 0 | 0            | 0 | -0.059262943 |
| cov1_2_3_4_9_10_11 | 39.6908 | -215.081 | 0.4199375 | 0 | -0.066799822 | 0 | -0.042374761 |
| cov1_2_3_4_5_9_10  | 39.7012 | -215.086 | 0.4193057 | 0 | -0.051917278 | 0 | -0.044927708 |
| cov1_2_3_8_9_10_11 | 39.7026 | -215.087 | 0.4199178 | 0 | -0.058872562 | 0 | -0.029486545 |
| cov1_2_3_7_9_10_11 | 39.7057 | -215.089 | 0.4199222 | 0 | -0.058884886 | 0 | -0.02949448  |
| cov1_2_3_5_8_9_10  | 39.7107 | -215.091 | 0.4195749 | 0 | -0.051979225 | 0 | -0.028761576 |
| cov1_2_3_7_8_9_10  | 39.7107 | -215.091 | 0.4196257 | 0 | -0.055121203 | 0 | -0.028956987 |
| cov1_3_6_8_9_10_11 | 39.7114 | -215.091 | 0.419192  | 0 | -0.050138648 | 0 | 0            |
| cov1_3_6_7_9_10_11 | 39.7116 | -215.091 | 0.4191899 | 0 | -0.049822576 | 0 | 0            |
| cov1_2_3_5_7_9_10  | 39.714  | -215.093 | 0.4195872 | 0 | -0.052147342 | 0 | -0.028777069 |
| cov1_3_5_6_7_9_10  | 39.719  | -215.095 | 0.4188393 | 0 | -0.041469027 | 0 | 0            |
| cov1_3_5_6_8_9_10  | 39.719  | -215.095 | 0.4188515 | 0 | -0.041920291 | 0 | 0            |
| cov1_3_4_6_8_9_10  | 39.7191 | -215.095 | 0.4190255 | 0 | -0.04446664  | 0 | 0            |
| cov1_3_4_6_7_9_10  | 39.7192 | -215.095 | 0.4190242 | 0 | -0.044133337 | 0 | 0            |
| cov1_3_6_7_8_9_10  | 39.721  | -215.096 | 0.4189037 | 0 | -0.046352859 | 0 | 0            |
| cov1_2_6_7_9_10_11 | 39.7252 | -215.098 | 0.4192762 | 0 | -0.025831229 | 0 | -0.028278503 |
| cov1_2_6_8_9_10_11 | 39.7282 | -215.1   | 0.4192722 | 0 | -0.02653269  | 0 | -0.028279862 |
| cov1_2_4_6_7_9_10  | 39.7453 | -215.108 | 0.4187519 | 0 | -0.021345739 | 0 | -0.028651627 |
| cov1_2_6_7_8_9_10  | 39.7459 | -215.109 | 0.4188159 | 0 | -0.021156603 | 0 | -0.027511006 |
| cov1_2_4_5_8_9_10  | 39.7468 | -215.109 | 0.4175635 | 0 | -0.013496724 | 0 | -0.044480888 |
| cov1_2_4_6_8_9_10  | 39.7489 | -215.11  | 0.4187463 | 0 | -0.02200643  | 0 | -0.028562518 |
| cov1_2_4_5_7_9_10  | 39.7498 | -215.111 | 0.4175543 | 0 | -0.013376855 | 0 | -0.044568834 |
| cov2_4_5_8_9_10_11 | 39.7575 | -215.114 | 0.4176389 | 0 | 0            | 0 | -0.052227742 |
| cov1_2_3_5_9_10_11 | 39.7591 | -215.115 | 0.4204197 | 0 | -0.069309311 | 0 | -0.030192827 |
| cov2_4_5_7_8_9_10  | 39.7598 | -215.116 | 0.4174894 | 0 | 0            | 0 | -0.050904285 |
| cov2_4_5_7_9_10_11 | 39.7604 | -215.116 | 0.4176327 | 0 | 0            | 0 | -0.052227293 |
| cov1_3_5_6_9_10_11 | 39.7774 | -215.124 | 0.4196774 | 0 | -0.060776846 | 0 | 0            |
| cov2_4_6_7_9_10_11 | 39.7852 | -215.128 | 0.4193647 | 0 | 0            | 0 | -0.035959976 |
| cov2_6_7_8_9_10_11 | 39.7852 | -215.128 | 0.4193737 | 0 | 0            | 0 | -0.035761287 |
| cov1_3_4_6_9_10_11 | 39.7853 | -215.128 | 0.4196677 | 0 | -0.053688568 | 0 | 0            |
| cov2_4_6_7_8_9_10  | 39.7902 | -215.131 | 0.4191189 | 0 | 0            | 0 | -0.034816921 |
| cov2_4_6_8_9_10_11 | 39.7916 | -215.131 | 0.4193696 | 0 | 0            | 0 | -0.036046459 |
| cov1_3_4_5_6_9_10  | 39.7948 | -215.133 | 0.4195292 | 0 | -0.056817653 | 0 | 0            |
| cov3_4_5_6_7_9_10  | 39.8229 | -215.147 | 0.4184857 | 0 | 0            | 0 | 0            |
| cov3_5_6_7_8_9_10  | 39.8231 | -215.147 | 0.4185431 | 0 | 0            | 0 | 0            |
| cov3_5_6_7_9_10_11 | 39.8231 | -215.147 | 0.4185353 | 0 | 0            | 0 | 0            |
| cov1_5_6_7_9_10_11 | 39.8247 | -215.148 | 0.4181863 | 0 | -0.024686436 | 0 | 0            |
| cov3_4_5_6_8_9_10  | 39.8263 | -215.149 | 0.4184935 | 0 | 0            | 0 | 0            |

|                    |         |          |           |   |              |              |
|--------------------|---------|----------|-----------|---|--------------|--------------|
| cov3_5_6_8_9_10_11 | 39.8265 | -215.149 | 0.4185381 | 0 | 0            | 0            |
| cov1_5_6_8_9_10_11 | 39.8275 | -215.149 | 0.4181817 | 0 | -0.025375106 | 0            |
| cov1_5_6_7_8_9_10  | 39.834  | -215.153 | 0.4178966 | 0 | -0.020888174 | 0            |
| cov1_4_5_6_7_9_10  | 39.8342 | -215.153 | 0.4179481 | 0 | -0.020919854 | 0            |
| cov1_2_5_8_9_10_11 | 39.836  | -215.154 | 0.4187765 | 0 | -0.034890481 | -0.027610734 |
| cov1_4_5_6_8_9_10  | 39.8372 | -215.154 | 0.4179457 | 0 | -0.021579886 | 0            |
| cov1_2_5_7_9_10_11 | 39.8399 | -215.156 | 0.4187693 | 0 | -0.034798872 | -0.027621872 |
| cov1_2_5_7_8_9_10  | 39.8448 | -215.158 | 0.4184799 | 0 | -0.03085699  | -0.027081006 |
| cov4_5_6_7_9_10_11 | 39.867  | -215.169 | 0.4180301 | 0 | 0            | 0            |
| cov5_6_7_8_9_10_11 | 39.867  | -215.169 | 0.4180631 | 0 | 0            | 0            |
| cov4_5_6_7_8_9_10  | 39.8679 | -215.17  | 0.4179402 | 0 | 0            | 0            |
| cov4_5_6_8_9_10_11 | 39.8722 | -215.172 | 0.4180271 | 0 | 0            | 0            |
| cov1_4_6_7_9_10_11 | 39.8723 | -215.172 | 0.4187461 | 0 | -0.039708357 | 0            |
| cov1_4_6_8_9_10_11 | 39.8747 | -215.173 | 0.418747  | 0 | -0.040330564 | 0            |
| cov1_4_6_7_8_9_10  | 39.8843 | -215.178 | 0.418417  | 0 | -0.035734651 | 0            |
| cov1_3_4_8_9_10_11 | 39.9025 | -215.187 | 0.4188164 | 0 | -0.078432374 | 0            |
| cov2_3_4_5_9_10_11 | 39.9033 | -215.187 | 0.4189656 | 0 | 0            | -0.067598702 |
| cov1_3_5_8_9_10_11 | 39.9034 | -215.187 | 0.4185172 | 0 | -0.07474905  | 0            |
| cov1_3_4_5_8_9_10  | 39.9047 | -215.188 | 0.4185264 | 0 | -0.07264342  | 0            |
| cov1_3_4_7_8_9_10  | 39.905  | -215.188 | 0.4186475 | 0 | -0.075933844 | 0            |
| cov1_3_5_7_8_9_10  | 39.9057 | -215.189 | 0.4183636 | 0 | -0.072376386 | 0            |
| cov1_3_4_7_9_10_11 | 39.9059 | -215.189 | 0.4188178 | 0 | -0.078482389 | 0            |
| cov2_3_5_8_9_10_11 | 39.906  | -215.189 | 0.4191085 | 0 | 0            | -0.039240213 |
| cov1_3_5_7_9_10_11 | 39.9069 | -215.189 | 0.4185216 | 0 | -0.074944797 | 0            |
| cov1_3_7_8_9_10_11 | 39.9076 | -215.189 | 0.4186107 | 0 | -0.082272735 | 0            |
| cov1_3_4_5_7_9_10  | 39.9082 | -215.19  | 0.4185314 | 0 | -0.072822724 | 0            |
| cov2_3_5_7_9_10_11 | 39.9097 | -215.191 | 0.4191019 | 0 | 0            | -0.039230029 |
| cov2_3_5_7_8_9_10  | 39.9102 | -215.191 | 0.4192846 | 0 | 0            | -0.040140417 |
| cov1_6_7_8_9_10_11 | 39.9147 | -215.193 | 0.4180402 | 0 | -0.04760141  | 0            |
| cov1_2_7_8_9_10_11 | 39.9261 | -215.199 | 0.4186658 | 0 | -0.058035095 | -0.028961759 |
| cov1_2_4_8_9_10_11 | 39.9262 | -215.199 | 0.4186683 | 0 | -0.058041501 | -0.028929045 |
| cov3_4_6_7_9_10_11 | 39.9273 | -215.199 | 0.4193193 | 0 | 0            | 0            |
| cov1_2_4_7_9_10_11 | 39.9301 | -215.201 | 0.4186601 | 0 | -0.057958443 | -0.028962778 |
| cov3_4_6_8_9_10_11 | 39.9312 | -215.201 | 0.4193292 | 0 | 0            | 0            |
| cov3_4_6_7_8_9_10  | 39.9321 | -215.202 | 0.4195445 | 0 | 0            | 0            |
| cov2_5_7_8_9_10_11 | 39.9369 | -215.204 | 0.418661  | 0 | 0            | -0.036274212 |
| cov1_2_4_7_8_9_10  | 39.9372 | -215.204 | 0.4183478 | 0 | -0.053773027 | -0.028198778 |
| cov1_3_4_5_9_10_11 | 39.9667 | -215.219 | 0.4193866 | 0 | -0.090556108 | 0            |
| cov3_6_7_8_9_10_11 | 39.9966 | -215.234 | 0.4185187 | 0 | 0            | 0            |
| cov1_4_5_8_9_10_11 | 40.0147 | -215.243 | 0.4177389 | 0 | -0.054808181 | 0            |
| cov1_5_7_8_9_10_11 | 40.016  | -215.244 | 0.4175905 | 0 | -0.054356964 | 0            |
| cov1_4_5_7_8_9_10  | 40.0182 | -215.245 | 0.4175556 | 0 | -0.051984369 | 0            |
| cov1_4_5_7_9_10_11 | 40.0188 | -215.245 | 0.4177296 | 0 | -0.054722367 | 0            |
| cov4_6_7_8_9_10_11 | 40.0286 | -215.25  | 0.4188625 | 0 | 0            | 0            |
| cov3_4_5_6_9_10_11 | 40.0287 | -215.25  | 0.4193438 | 0 | 0            | 0            |
| cov1_4_7_8_9_10_11 | 40.067  | -215.269 | 0.4182368 | 0 | -0.070584196 | 0            |
| cov2_3_4_5_6_7_10  | 40.2589 | -215.365 | 0.4177866 | 0 | 0            | -0.046969188 |

|                    |         |          |           |   |              |   |              |
|--------------------|---------|----------|-----------|---|--------------|---|--------------|
| cov2_3_4_5_6_8_10  | 40.2595 | -215.365 | 0.4177908 | 0 | 0            | 0 | -0.047097508 |
| cov2_3_4_8_9_10_11 | 40.2716 | -215.371 | 0.4192302 | 0 | 0            | 0 | -0.063139993 |
| cov2_3_7_8_9_10_11 | 40.2721 | -215.372 | 0.4192677 | 0 | 0            | 0 | -0.061773224 |
| cov2_3_4_7_9_10_11 | 40.2745 | -215.373 | 0.4192273 | 0 | 0            | 0 | -0.063158277 |
| cov4_5_7_8_9_10_11 | 40.313  | -215.392 | 0.4165408 | 0 | 0            | 0 | 0            |
| cov3_4_5_8_9_10_11 | 40.3135 | -215.392 | 0.4165486 | 0 | 0            | 0 | 0            |
| cov3_5_7_8_9_10_11 | 40.3138 | -215.393 | 0.4166502 | 0 | 0            | 0 | 0            |
| cov3_4_5_7_9_10_11 | 40.3165 | -215.394 | 0.416537  | 0 | 0            | 0 | 0            |
| cov1_2_3_4_6_7_10  | 40.3207 | -215.396 | 0.4184737 | 0 | -0.021304419 | 0 | -0.040681788 |
| cov1_2_3_4_6_8_10  | 40.3207 | -215.396 | 0.4184779 | 0 | -0.021604088 | 0 | -0.040686357 |
| cov1_2_5_6_9_10_11 | 40.3407 | -215.406 | 0.4192109 | 0 | -0.021488474 | 0 | -0.027314563 |
| cov1_2_3_4_6_10_11 | 40.3422 | -215.407 | 0.4193379 | 0 | -0.0308083   | 0 | -0.044269722 |
| cov2_4_5_6_9_10_11 | 40.3438 | -215.408 | 0.4188098 | 0 | 0            | 0 | -0.037845275 |
| cov1_2_3_6_8_10_11 | 40.3453 | -215.408 | 0.4192986 | 0 | -0.023603613 | 0 | -0.031077584 |
| cov1_2_3_6_7_10_11 | 40.3454 | -215.408 | 0.419296  | 0 | -0.023280434 | 0 | -0.031074622 |
| cov2_3_4_5_6_10_11 | 40.3506 | -215.411 | 0.419002  | 0 | 0            | 0 | -0.054082561 |
| cov2_3_4_6_7_10_11 | 40.3565 | -215.414 | 0.4191277 | 0 | 0            | 0 | -0.047691744 |
| cov2_3_4_6_8_10_11 | 40.3578 | -215.415 | 0.4191362 | 0 | 0            | 0 | -0.047803713 |
| cov3_4_5_7_8_9_10  | 40.3595 | -215.415 | 0.4169405 | 0 | 0            | 0 | 0            |
| cov2_4_5_6_7_10_11 | 40.3599 | -215.416 | 0.4173945 | 0 | 0            | 0 | -0.041855622 |
| cov2_3_5_6_7_10_11 | 40.3626 | -215.417 | 0.4191311 | 0 | 0            | 0 | -0.033380699 |
| cov2_4_5_6_8_10_11 | 40.3627 | -215.417 | 0.4173935 | 0 | 0            | 0 | -0.041992396 |
| cov2_3_5_6_8_10_11 | 40.3637 | -215.418 | 0.4191384 | 0 | 0            | 0 | -0.033483084 |
| cov2_3_4_6_7_8_10  | 40.3651 | -215.418 | 0.4188049 | 0 | 0            | 0 | -0.046281364 |
| cov1_2_3_5_6_7_10  | 40.3685 | -215.42  | 0.4187206 | 0 | -0.013540704 | 0 | -0.029941317 |
| cov1_2_3_5_6_8_10  | 40.3687 | -215.42  | 0.4187244 | 0 | -0.014037617 | 0 | -0.029949977 |
| cov1_2_4_5_6_7_10  | 40.3689 | -215.42  | 0.4167798 | 0 | 0.024180514  | 0 | -0.046526128 |
| cov1_2_3_6_7_8_10  | 40.3705 | -215.421 | 0.4187852 | 0 | -0.018128649 | 0 | -0.030241376 |
| cov1_2_4_5_6_8_10  | 40.3739 | -215.423 | 0.416776  | 0 | 0.023309398  | 0 | -0.046359621 |
| cov1_2_3_4_5_6_10  | 40.3783 | -215.425 | 0.4184794 | 0 | -0.014985102 | 0 | -0.04641975  |
| cov2_3_5_6_7_8_10  | 40.3784 | -215.425 | 0.4187319 | 0 | 0            | 0 | -0.032042462 |
| cov2_3_4_7_8_9_10  | 40.3832 | -215.427 | 0.4203287 | 0 | 0            | 0 | -0.07144245  |
| cov1_2_4_6_9_10_11 | 40.3873 | -215.429 | 0.419355  | 0 | -0.036985824 | 0 | -0.024554931 |
| cov2_3_6_7_8_10_11 | 40.3942 | -215.433 | 0.4193637 | 0 | 0            | 0 | -0.037797936 |
| cov2_4_5_6_7_8_10  | 40.4001 | -215.436 | 0.4167781 | 0 | 0            | 0 | -0.038268597 |
| cov1_2_3_5_6_10_11 | 40.4135 | -215.442 | 0.4198387 | 0 | -0.034259026 | 0 | -0.031819522 |
| cov1_2_3_4_5_8_10  | 40.422  | -215.447 | 0.4173965 | 0 | -0.023965677 | 0 | -0.04825658  |
| cov1_2_3_4_5_7_10  | 40.4252 | -215.448 | 0.4173977 | 0 | -0.023990055 | 0 | -0.048276328 |
| cov2_5_6_7_8_10_11 | 40.4506 | -215.461 | 0.4182596 | 0 | 0            | 0 | -0.029370021 |
| cov1_2_5_6_7_10_11 | 40.4509 | -215.461 | 0.4182558 | 0 | -0.000498205 | 0 | -0.029256705 |
| cov2_4_7_8_9_10_11 | 40.451  | -215.461 | 0.4184745 | 0 | 0            | 0 | -0.05229095  |
| cov2_3_4_5_8_10_11 | 40.4534 | -215.462 | 0.4172305 | 0 | 0            | 0 | -0.058254532 |
| cov1_2_5_6_8_10_11 | 40.4537 | -215.463 | 0.4182526 | 0 | -0.001174892 | 0 | -0.029256491 |
| cov2_3_4_5_7_10_11 | 40.4566 | -215.464 | 0.4172238 | 0 | 0            | 0 | -0.058248903 |
| cov2_3_4_5_7_8_10  | 40.4571 | -215.464 | 0.4170797 | 0 | 0            | 0 | -0.056989119 |
| cov1_2_3_4_8_10_11 | 40.472  | -215.472 | 0.4185286 | 0 | -0.056871363 | 0 | -0.041127756 |
| cov1_2_3_4_7_10_11 | 40.4746 | -215.473 | 0.4185319 | 0 | -0.056908306 | 0 | -0.04118238  |



|                    |         |          |           |   |              |   |              |
|--------------------|---------|----------|-----------|---|--------------|---|--------------|
| cov1_2_5_6_7_8_10  | 40.4749 | -215.473 | 0.4177456 | 0 | 0.005043704  | 0 | -0.028406413 |
| cov1_4_5_6_9_10_11 | 40.4819 | -215.477 | 0.4187946 | 0 | -0.042244126 | 0 | 0            |
| cov1_2_4_5_6_9_10  | 40.4851 | -215.478 | 0.4176567 | 0 | -0.005419524 | 0 | -0.028679683 |
| cov1_2_3_4_7_8_10  | 40.4878 | -215.48  | 0.4181339 | 0 | -0.051692176 | 0 | -0.040259346 |
| cov1_2_3_4_5_10_11 | 40.5039 | -215.488 | 0.4186222 | 0 | -0.048802305 | 0 | -0.047649982 |
| cov1_2_3_5_8_10_11 | 40.5081 | -215.49  | 0.4186977 | 0 | -0.04627309  | 0 | -0.031257723 |
| cov1_2_4_5_9_10_11 | 40.5102 | -215.491 | 0.4183913 | 0 | -0.044876714 | 0 | -0.032672518 |
| cov1_2_3_5_7_10_11 | 40.5114 | -215.491 | 0.4187014 | 0 | -0.046415324 | 0 | -0.031275248 |
| cov1_2_3_7_8_10_11 | 40.5117 | -215.492 | 0.4187991 | 0 | -0.052750322 | 0 | -0.031686189 |
| cov1_2_4_5_8_10_11 | 40.5173 | -215.494 | 0.4168314 | 0 | -0.0106217   | 0 | -0.047039049 |
| cov1_2_4_5_7_10_11 | 40.5201 | -215.496 | 0.4168201 | 0 | -0.010443083 | 0 | -0.047113528 |
| cov1_2_3_5_7_8_10  | 40.5222 | -215.497 | 0.4183209 | 0 | -0.041279394 | 0 | -0.030590107 |
| cov2_4_5_7_8_10_11 | 40.5242 | -215.498 | 0.4166923 | 0 | 0            | 0 | -0.051315019 |
| cov1_2_4_5_7_8_10  | 40.5322 | -215.502 | 0.41644   | 0 | -0.005319585 | 0 | -0.046282452 |
| cov1_2_4_6_7_10_11 | 40.5339 | -215.503 | 0.4181242 | 0 | -0.021685424 | 0 | -0.031290989 |
| cov1_2_6_7_8_10_11 | 40.5341 | -215.503 | 0.4181641 | 0 | -0.021577585 | 0 | -0.030542382 |
| cov1_2_4_6_8_10_11 | 40.5371 | -215.504 | 0.4181205 | 0 | -0.022323183 | 0 | -0.031221991 |
| cov1_2_4_6_7_8_10  | 40.5623 | -215.517 | 0.4176019 | 0 | -0.016065513 | 0 | -0.030084707 |
| cov1_3_4_6_7_10_11 | 40.5658 | -215.519 | 0.4181483 | 0 | -0.043022589 | 0 | 0            |
| cov1_3_4_6_8_10_11 | 40.5658 | -215.519 | 0.4181513 | 0 | -0.043376274 | 0 | 0            |
| cov1_3_5_6_7_10_11 | 40.5667 | -215.519 | 0.4177862 | 0 | -0.038328376 | 0 | 0            |
| cov1_3_5_6_8_10_11 | 40.5668 | -215.519 | 0.4177912 | 0 | -0.038850566 | 0 | 0            |
| cov1_3_6_7_8_10_11 | 40.5743 | -215.523 | 0.4178939 | 0 | -0.047103833 | 0 | 0            |
| cov2_4_6_7_8_10_11 | 40.5757 | -215.523 | 0.4182639 | 0 | 0            | 0 | -0.036455436 |
| cov1_3_4_5_6_7_10  | 40.5785 | -215.525 | 0.4176251 | 0 | -0.034256321 | 0 | 0            |
| cov1_3_4_5_6_8_10  | 40.5788 | -215.525 | 0.4176326 | 0 | -0.034797008 | 0 | 0            |
| cov1_3_5_6_7_8_10  | 40.5804 | -215.526 | 0.4174331 | 0 | -0.033700128 | 0 | 0            |
| cov1_3_4_6_7_8_10  | 40.5806 | -215.526 | 0.4177995 | 0 | -0.038662398 | 0 | 0            |
| cov1_2_5_7_8_10_11 | 40.6139 | -215.543 | 0.4177365 | 0 | -0.027633855 | 0 | -0.029727509 |
| cov1_3_4_5_6_10_11 | 40.643  | -215.557 | 0.4187644 | 0 | -0.056275388 | 0 | 0            |
| cov3_4_5_6_7_10_11 | 40.6477 | -215.56  | 0.4173578 | 0 | 0            | 0 | 0            |
| cov3_5_6_7_8_10_11 | 40.648  | -215.56  | 0.4172933 | 0 | 0            | 0 | 0            |
| cov2_3_5_7_8_10_11 | 40.6487 | -215.56  | 0.418096  | 0 | 0            | 0 | -0.039459401 |
| cov3_4_5_6_7_8_10  | 40.6489 | -215.56  | 0.4172686 | 0 | 0            | 0 | 0            |
| cov3_4_5_6_8_10_11 | 40.651  | -215.561 | 0.4173651 | 0 | 0            | 0 | 0            |
| cov1_4_5_6_7_10_11 | 40.6513 | -215.561 | 0.4171573 | 0 | -0.021134192 | 0 | 0            |
| cov1_5_6_7_8_10_11 | 40.6529 | -215.562 | 0.416981  | 0 | -0.020632613 | 0 | 0            |
| cov1_4_5_6_8_10_11 | 40.6541 | -215.563 | 0.4171609 | 0 | -0.021828987 | 0 | 0            |
| cov1_4_5_6_7_8_10  | 40.6656 | -215.568 | 0.4167827 | 0 | -0.016348812 | 0 | 0            |
| cov4_5_6_7_8_10_11 | 40.6819 | -215.577 | 0.4169703 | 0 | 0            | 0 | 0            |
| cov1_4_6_7_8_10_11 | 40.6983 | -215.585 | 0.417651  | 0 | -0.035957967 | 0 | 0            |
| cov2_3_4_5_6_7_9   | 40.7034 | -215.587 | 0.4184773 | 0 | 0            | 0 | -0.050602961 |
| cov2_3_4_5_6_8_9   | 40.7049 | -215.588 | 0.4184833 | 0 | 0            | 0 | -0.05075802  |
| cov1_2_4_7_8_10_11 | 40.7135 | -215.592 | 0.4176493 | 0 | -0.051696567 | 0 | -0.030558065 |
| cov1_2_3_4_6_7_9   | 40.7244 | -215.598 | 0.4189531 | 0 | -0.021466666 | 0 | -0.044397973 |
| cov1_2_3_4_6_8_9   | 40.7247 | -215.598 | 0.4189496 | 0 | -0.021828913 | 0 | -0.044415923 |
| cov1_3_4_5_8_10_11 | 40.7331 | -215.602 | 0.4175283 | 0 | -0.067075138 | 0 | 0            |

|                    |         |          |           |   |              |   |              |
|--------------------|---------|----------|-----------|---|--------------|---|--------------|
| cov1_3_4_7_8_10_11 | 40.7352 | -215.603 | 0.4177131 | 0 | -0.071993645 | 0 | 0            |
| cov1_3_4_5_7_10_11 | 40.7365 | -215.604 | 0.4175319 | 0 | -0.067219016 | 0 | 0            |
| cov1_3_5_7_8_10_11 | 40.7374 | -215.604 | 0.4172492 | 0 | -0.066339995 | 0 | 0            |
| cov1_3_4_5_7_8_10  | 40.7395 | -215.605 | 0.417289  | 0 | -0.063330316 | 0 | 0            |
| cov3_4_6_7_8_10_11 | 40.7428 | -215.607 | 0.418163  | 0 | 0            | 0 | 0            |
| cov2_3_4_6_7_9_11  | 40.7569 | -215.614 | 0.4196598 | 0 | 0            | 0 | -0.051676565 |
| cov2_3_4_6_8_9_11  | 40.759  | -215.615 | 0.4196702 | 0 | 0            | 0 | -0.051817472 |
| cov2_4_5_6_7_9_11  | 40.7684 | -215.62  | 0.4182048 | 0 | 0            | 0 | -0.046580701 |
| cov2_3_4_6_7_8_9   | 40.7693 | -215.62  | 0.4192767 | 0 | 0            | 0 | -0.050000702 |
| cov1_2_3_6_7_9_11  | 40.7716 | -215.621 | 0.4198915 | 0 | -0.02312767  | 0 | -0.032252038 |
| cov1_2_3_6_8_9_11  | 40.7718 | -215.622 | 0.4198972 | 0 | -0.023557828 | 0 | -0.032255407 |
| cov2_4_5_6_8_9_11  | 40.7721 | -215.622 | 0.4181988 | 0 | 0            | 0 | -0.046719004 |
| cov1_2_3_4_6_9_11  | 40.7756 | -215.623 | 0.4199741 | 0 | -0.03284377  | 0 | -0.048973152 |
| cov1_2_3_5_6_7_9   | 40.799  | -215.635 | 0.4194201 | 0 | -0.023235831 | 0 | -0.031715265 |
| cov1_2_3_5_6_8_9   | 40.7993 | -215.635 | 0.4194244 | 0 | -0.023778985 | 0 | -0.03172526  |
| cov1_2_4_5_6_7_9   | 40.8007 | -215.636 | 0.4175986 | 0 | 0.012319023  | 0 | -0.047216333 |
| cov1_2_3_6_7_8_9   | 40.803  | -215.637 | 0.4193287 | 0 | -0.017358907 | 0 | -0.031329191 |
| cov1_2_4_5_6_8_9   | 40.8056 | -215.638 | 0.4175959 | 0 | 0.011426434  | 0 | -0.047052165 |
| cov2_4_5_6_7_8_9   | 40.8086 | -215.64  | 0.4175995 | 0 | 0            | 0 | -0.043017915 |
| cov2_3_5_6_7_9_11  | 40.8114 | -215.641 | 0.419833  | 0 | 0            | 0 | -0.036688174 |
| cov2_3_5_6_8_9_11  | 40.8134 | -215.642 | 0.4198411 | 0 | 0            | 0 | -0.036817629 |
| cov1_4_5_7_8_10_11 | 40.8192 | -215.645 | 0.4166996 | 0 | -0.049238725 | 0 | 0            |
| cov2_3_6_7_8_9_11  | 40.8197 | -215.645 | 0.4199536 | 0 | 0            | 0 | -0.038928932 |
| cov2_3_5_6_7_8_9   | 40.8282 | -215.65  | 0.4194298 | 0 | 0            | 0 | -0.035316026 |
| cov2_3_4_5_6_9_11  | 40.8351 | -215.653 | 0.419809  | 0 | 0            | 0 | -0.058552678 |
| cov1_2_3_4_5_6_9   | 40.8381 | -215.655 | 0.4192991 | 0 | -0.027380482 | 0 | -0.046884231 |
| cov1_2_3_5_6_9_11  | 40.8473 | -215.659 | 0.4206485 | 0 | -0.045985403 | 0 | -0.033803191 |
| cov1_2_5_6_7_9_11  | 40.8619 | -215.667 | 0.4190679 | 0 | -0.011868039 | 0 | -0.031199957 |
| cov1_2_5_6_8_9_11  | 40.8647 | -215.668 | 0.4190637 | 0 | -0.012551699 | 0 | -0.031199639 |
| cov1_2_4_6_7_9_11  | 40.8681 | -215.67  | 0.4187709 | 0 | -0.023325655 | 0 | -0.036398993 |
| cov2_5_6_7_8_9_11  | 40.8704 | -215.671 | 0.4191119 | 0 | 0            | 0 | -0.033338364 |
| cov1_2_4_6_8_9_11  | 40.8714 | -215.671 | 0.418771  | 0 | -0.024024474 | 0 | -0.036323919 |
| cov1_2_6_7_8_9_11  | 40.8805 | -215.676 | 0.4190217 | 0 | -0.021993105 | 0 | -0.031745774 |
| cov1_2_5_6_7_8_9   | 40.8934 | -215.682 | 0.4185033 | 0 | -0.00556408  | 0 | -0.030246049 |
| cov1_2_3_4_5_8_9   | 40.9018 | -215.687 | 0.418096  | 0 | -0.037780945 | 0 | -0.048859428 |
| cov1_2_4_6_7_8_9   | 40.9033 | -215.687 | 0.4181942 | 0 | -0.017064433 | 0 | -0.035093693 |
| cov1_2_3_4_8_9_11  | 40.905  | -215.688 | 0.4189927 | 0 | -0.060583567 | 0 | -0.044935189 |
| cov1_2_3_4_5_7_9   | 40.9057 | -215.689 | 0.4180991 | 0 | -0.037830087 | 0 | -0.048874478 |
| cov1_2_3_4_7_9_11  | 40.9086 | -215.69  | 0.4189939 | 0 | -0.06060303  | 0 | -0.04498937  |
| cov2_4_6_7_8_9_11  | 40.9163 | -215.694 | 0.4189129 | 0 | 0            | 0 | -0.04192829  |
| cov1_2_3_4_7_8_9   | 40.9258 | -215.699 | 0.4185483 | 0 | -0.054706916 | 0 | -0.043963256 |
| cov1_2_3_5_8_9_11  | 40.9686 | -215.72  | 0.419375  | 0 | -0.059559939 | 0 | -0.033243298 |
| cov1_2_3_7_8_9_11  | 40.97   | -215.721 | 0.4193203 | 0 | -0.05523537  | 0 | -0.032964372 |
| cov2_3_4_7_8_10_11 | 40.9716 | -215.721 | 0.4182411 | 0 | 0            | 0 | -0.061727995 |
| cov1_2_3_5_7_9_11  | 40.9724 | -215.722 | 0.4193809 | 0 | -0.059721062 | 0 | -0.033263747 |
| cov1_2_4_5_8_9_11  | 40.9784 | -215.725 | 0.4176361 | 0 | -0.026113363 | 0 | -0.047875437 |
| cov1_2_4_5_7_9_11  | 40.9822 | -215.727 | 0.4176247 | 0 | -0.025950324 | 0 | -0.047943418 |

|                    |         |          |           |   |              |   |              |
|--------------------|---------|----------|-----------|---|--------------|---|--------------|
| cov2_3_4_5_8_9_11  | 40.9863 | -215.729 | 0.4176844 | 0 | 0            | 0 | -0.063551401 |
| cov1_2_3_5_7_8_9   | 40.9876 | -215.729 | 0.4189441 | 0 | -0.053814957 | 0 | -0.03247853  |
| cov3_4_7_8_9_10_11 | 40.988  | -215.73  | 0.4175973 | 0 | 0            | 0 | 0            |
| cov2_3_4_5_7_8_9   | 40.9885 | -215.73  | 0.4175689 | 0 | 0            | 0 | -0.062570148 |
| cov1_2_3_4_5_9_11  | 40.9898 | -215.731 | 0.4194195 | 0 | -0.064639522 | 0 | -0.048297166 |
| cov2_3_4_5_7_9_11  | 40.99   | -215.731 | 0.4176752 | 0 | 0            | 0 | -0.063534142 |
| cov1_2_4_5_7_8_9   | 40.9987 | -215.735 | 0.4171951 | 0 | -0.020102157 | 0 | -0.046988159 |
| cov1_3_4_6_7_9_11  | 41.0153 | -215.743 | 0.4186161 | 0 | -0.045311427 | 0 | 0            |
| cov1_3_4_6_8_9_11  | 41.0156 | -215.743 | 0.418624  | 0 | -0.045777675 | 0 | 0            |
| cov1_2_3_4_6_7_11  | 41.0163 | -215.744 | 0.4211417 | 0 | -0.031856907 | 0 | -0.052355898 |
| cov1_2_3_4_6_8_11  | 41.0171 | -215.744 | 0.4211486 | 0 | -0.032379297 | 0 | -0.052375214 |
| cov1_3_5_6_7_9_11  | 41.0179 | -215.745 | 0.4184962 | 0 | -0.050218632 | 0 | 0            |
| cov1_3_5_6_8_9_11  | 41.0181 | -215.745 | 0.4185012 | 0 | -0.050785497 | 0 | 0            |
| cov1_3_6_7_8_9_11  | 41.0181 | -215.745 | 0.4184656 | 0 | -0.047893571 | 0 | 0            |
| cov2_4_5_7_8_9_11  | 41.0234 | -215.747 | 0.4172916 | 0 | 0            | 0 | -0.058441905 |
| cov1_3_4_5_6_7_9   | 41.0307 | -215.751 | 0.4184158 | 0 | -0.045836983 | 0 | 0            |
| cov1_3_4_5_6_8_9   | 41.0309 | -215.751 | 0.4184239 | 0 | -0.046414895 | 0 | 0            |
| cov1_3_4_6_7_8_9   | 41.0345 | -215.753 | 0.418207  | 0 | -0.040345504 | 0 | 0            |
| cov1_3_5_6_7_8_9   | 41.037  | -215.754 | 0.4180866 | 0 | -0.044809059 | 0 | 0            |
| cov1_2_3_4_5_6_7   | 41.0602 | -215.766 | 0.420588  | 0 | -0.02950993  | 0 | -0.049326816 |
| cov3_4_5_7_8_10_11 | 41.0609 | -215.766 | 0.4156475 | 0 | 0            | 0 | 0            |
| cov1_2_3_4_5_6_8   | 41.0611 | -215.766 | 0.4205995 | 0 | -0.03028113  | 0 | -0.049262044 |
| cov1_2_5_7_8_9_11  | 41.0618 | -215.767 | 0.4184667 | 0 | -0.041865774 | 0 | -0.031778483 |
| cov1_2_3_4_6_7_8   | 41.0623 | -215.767 | 0.4205012 | 0 | -0.024812575 | 0 | -0.050954636 |
| cov2_3_4_5_6_7_11  | 41.0774 | -215.774 | 0.4210487 | 0 | 0            | 0 | -0.060812837 |
| cov2_3_4_5_6_8_11  | 41.0812 | -215.776 | 0.4210656 | 0 | 0            | 0 | -0.061045749 |
| cov1_2_4_7_8_9_11  | 41.0835 | -215.777 | 0.4182247 | 0 | -0.056108858 | 0 | -0.03566017  |
| cov1_4_5_6_7_9_11  | 41.0861 | -215.779 | 0.4180595 | 0 | -0.034619783 | 0 | 0            |
| cov1_4_5_6_8_9_11  | 41.0886 | -215.78  | 0.4180627 | 0 | -0.035311807 | 0 | 0            |
| cov1_4_6_7_8_9_11  | 41.0918 | -215.782 | 0.418231  | 0 | -0.039957234 | 0 | 0            |
| cov1_5_6_7_8_9_11  | 41.092  | -215.782 | 0.4177419 | 0 | -0.033642838 | 0 | 0            |
| cov1_2_3_5_6_8_11  | 41.093  | -215.782 | 0.4219487 | 0 | -0.052390758 | 0 | -0.034964605 |
| cov1_2_3_5_6_7_11  | 41.0931 | -215.782 | 0.4219436 | 0 | -0.051874539 | 0 | -0.034956022 |
| cov1_3_4_5_6_9_11  | 41.0988 | -215.785 | 0.4196606 | 0 | -0.069850291 | 0 | 0            |
| cov2_3_4_5_6_7_8   | 41.1035 | -215.787 | 0.4205873 | 0 | 0            | 0 | -0.058221503 |
| cov2_3_4_6_7_8_11  | 41.1056 | -215.788 | 0.4213426 | 0 | 0            | 0 | -0.059420081 |
| cov1_2_4_5_6_7_11  | 41.1059 | -215.789 | 0.420307  | 0 | -0.019164867 | 0 | -0.048902003 |
| cov1_4_5_6_7_8_9   | 41.1061 | -215.789 | 0.417622  | 0 | -0.029000816 | 0 | 0            |
| cov1_2_4_5_6_8_11  | 41.1097 | -215.791 | 0.4203108 | 0 | -0.020057199 | 0 | -0.048762608 |
| cov1_2_4_6_7_8_11  | 41.1172 | -215.794 | 0.4203517 | 0 | -0.02807528  | 0 | -0.044474901 |
| cov1_2_4_5_6_10_11 | 41.1198 | -215.796 | 0.4178573 | 0 | -0.010651949 | 0 | -0.034939851 |
| cov2_4_5_6_7_8_11  | 41.1264 | -215.799 | 0.4203833 | 0 | 0            | 0 | -0.055548024 |
| cov1_2_3_4_5_6_11  | 41.1325 | -215.802 | 0.4221459 | 0 | -0.059390079 | 0 | -0.049119978 |
| cov1_2_3_5_6_7_8   | 41.1361 | -215.804 | 0.4213259 | 0 | -0.044878096 | 0 | -0.033866038 |
| cov1_2_4_5_6_7_8   | 41.1508 | -215.811 | 0.4196938 | 0 | -0.012303793 | 0 | -0.047522429 |
| cov3_4_5_6_7_9_11  | 41.1553 | -215.813 | 0.4180067 | 0 | 0            | 0 | 0            |
| cov3_4_5_6_7_8_9   | 41.1562 | -215.814 | 0.4179311 | 0 | 0            | 0 | 0            |

|                      |         |          |           |   |              |   |              |
|----------------------|---------|----------|-----------|---|--------------|---|--------------|
| cov3_5_6_7_8_9_11    | 41.1571 | -215.814 | 0.4178414 | 0 | 0            | 0 | 0            |
| cov3_4_5_6_8_9_11    | 41.1602 | -215.816 | 0.418015  | 0 | 0            | 0 | 0            |
| cov4_5_6_7_8_9_11    | 41.1684 | -215.82  | 0.4177625 | 0 | 0            | 0 | 0            |
| cov1_2_5_6_7_8_11    | 41.1813 | -215.826 | 0.4210321 | 0 | -0.034499537 | 0 | -0.033497233 |
| cov1_2_3_6_7_8_11    | 41.19   | -215.831 | 0.421926  | 0 | -0.025662531 | 0 | -0.033430252 |
| cov2_3_5_7_8_9_11    | 41.1996 | -215.835 | 0.4185627 | 0 | 0            | 0 | -0.043853662 |
| cov3_4_6_7_8_9_11    | 41.2111 | -215.841 | 0.4186233 | 0 | 0            | 0 | 0            |
| cov1_3_4_5_8_9_11    | 41.2172 | -215.844 | 0.4182996 | 0 | -0.082397609 | 0 | 0            |
| cov1_3_4_7_8_9_11    | 41.2203 | -215.846 | 0.4181113 | 0 | -0.07709683  | 0 | 0            |
| cov1_3_4_5_7_9_11    | 41.2213 | -215.846 | 0.4183037 | 0 | -0.082570297 | 0 | 0            |
| cov1_3_4_5_7_8_9     | 41.227  | -215.849 | 0.4180011 | 0 | -0.077862695 | 0 | 0            |
| cov1_3_5_7_8_9_11    | 41.2281 | -215.85  | 0.4178703 | 0 | -0.081232331 | 0 | 0            |
| cov2_3_5_6_7_8_11    | 41.2401 | -215.856 | 0.422056  | 0 | 0            | 0 | -0.04290922  |
| cov1_4_5_7_8_9_11    | 41.291  | -215.881 | 0.4175253 | 0 | -0.065676669 | 0 | 0            |
| cov1_2_3_4_5_8_11    | 41.3264 | -215.899 | 0.4208083 | 0 | -0.07902291  | 0 | -0.050182196 |
| cov1_2_3_4_7_8_11    | 41.3303 | -215.901 | 0.4207032 | 0 | -0.072591611 | 0 | -0.052474266 |
| cov1_2_3_4_5_7_11    | 41.3319 | -215.902 | 0.4208169 | 0 | -0.079278631 | 0 | -0.050188688 |
| cov1_2_3_4_5_7_8     | 41.3538 | -215.913 | 0.4203229 | 0 | -0.072592942 | 0 | -0.049060104 |
| cov1_3_4_5_6_8_11    | 41.3624 | -215.917 | 0.4210008 | 0 | -0.077327594 | 0 | 0            |
| cov1_3_4_5_6_7_11    | 41.3625 | -215.917 | 0.4209937 | 0 | -0.076780582 | 0 | 0            |
| cov1_3_5_6_7_8_11    | 41.3809 | -215.926 | 0.4204772 | 0 | -0.075214522 | 0 | 0            |
| cov1_2_3_5_7_8_11    | 41.3891 | -215.93  | 0.4214535 | 0 | -0.092005364 | 0 | -0.035989662 |
| cov1_3_4_5_6_7_8     | 41.3913 | -215.931 | 0.4204995 | 0 | -0.070360954 | 0 | 0            |
| cov1_2_4_5_7_8_11    | 41.4141 | -215.943 | 0.4199288 | 0 | -0.061867705 | 0 | -0.048359996 |
| cov1_4_5_6_7_8_11    | 41.4311 | -215.951 | 0.4202187 | 0 | -0.06047614  | 0 | 0            |
| cov1_3_4_6_7_8_11    | 41.4529 | -215.962 | 0.4203801 | 0 | -0.053137694 | 0 | 0            |
| cov2_3_4_7_8_9_11    | 41.4675 | -215.969 | 0.4186093 | 0 | 0            | 0 | -0.066665032 |
| cov1_2_4_5_6_9_11    | 41.5487 | -216.01  | 0.4187036 | 0 | -0.023282334 | 0 | -0.035731478 |
| cov1_3_4_5_7_8_11    | 41.6661 | -216.069 | 0.4205937 | 0 | -0.11848444  | 0 | 0            |
| cov3_4_5_7_8_9_11    | 41.7099 | -216.091 | 0.4159608 | 0 | 0            | 0 | 0            |
| cov3_4_5_6_7_8_11    | 41.7174 | -216.094 | 0.4204305 | 0 | 0            | 0 | 0            |
| cov2_3_4_5_7_8_11    | 41.7313 | -216.101 | 0.4199944 | 0 | 0            | 0 | -0.079615635 |
| cov2_3_4_5_6_7_9_10  | 46.4629 | -214.945 | 0.4190421 | 0 | 0            | 0 | -0.047850061 |
| cov2_3_4_5_6_8_9_10  | 46.4637 | -214.945 | 0.4190465 | 0 | 0            | 0 | -0.047977732 |
| cov1_2_3_4_6_8_9_10  | 46.5127 | -214.97  | 0.4197183 | 0 | -0.027462715 | 0 | -0.03997005  |
| cov1_2_3_4_6_7_9_10  | 46.5129 | -214.97  | 0.4197175 | 0 | -0.027196219 | 0 | -0.039969946 |
| cov1_2_3_4_6_9_10_11 | 46.534  | -214.98  | 0.4204749 | 0 | -0.035586557 | 0 | -0.043191655 |
| cov1_2_3_6_8_9_10_11 | 46.5595 | -214.993 | 0.4204881 | 0 | -0.028123159 | 0 | -0.028813463 |
| cov1_2_3_6_7_9_10_11 | 46.5597 | -214.993 | 0.4204861 | 0 | -0.027816531 | 0 | -0.028811274 |
| cov2_3_4_5_6_9_10_11 | 46.561  | -214.994 | 0.4201329 | 0 | 0            | 0 | -0.054294052 |
| cov1_2_3_4_5_6_9_10  | 46.5613 | -214.994 | 0.419729  | 0 | -0.021836644 | 0 | -0.045059428 |
| cov1_2_3_6_7_8_9_10  | 46.5775 | -215.002 | 0.4200552 | 0 | -0.023520881 | 0 | -0.028097888 |
| cov1_2_3_5_6_8_9_10  | 46.5777 | -215.002 | 0.4200465 | 0 | -0.023013063 | 0 | -0.028053473 |
| cov1_2_3_5_6_7_9_10  | 46.5778 | -215.002 | 0.4200447 | 0 | -0.022595481 | 0 | -0.028047162 |
| cov2_3_4_6_7_9_10_11 | 46.5821 | -215.004 | 0.4203095 | 0 | 0            | 0 | -0.047902799 |
| cov2_3_4_6_8_9_10_11 | 46.5836 | -215.005 | 0.4203178 | 0 | 0            | 0 | -0.048016323 |
| cov2_3_4_6_7_8_9_10  | 46.5848 | -215.006 | 0.4201274 | 0 | 0            | 0 | -0.047098478 |

|                      |         |          |           |   |              |   |              |
|----------------------|---------|----------|-----------|---|--------------|---|--------------|
| cov2_4_5_6_7_9_10_11 | 46.5936 | -215.01  | 0.4184638 | 0 | 0            | 0 | -0.041604145 |
| cov2_4_5_6_8_9_10_11 | 46.5969 | -215.012 | 0.4184619 | 0 | 0            | 0 | -0.041742833 |
| cov2_3_5_6_7_9_10_11 | 46.598  | -215.012 | 0.4203282 | 0 | 0            | 0 | -0.032469784 |
| cov2_3_5_6_8_9_10_11 | 46.5992 | -215.013 | 0.4203312 | 0 | 0            | 0 | -0.032575093 |
| cov1_2_4_5_6_7_9_10  | 46.6043 | -215.015 | 0.4179509 | 0 | 0.018019916  | 0 | -0.044761184 |
| cov2_3_5_6_7_8_9_10  | 46.6054 | -215.016 | 0.4200529 | 0 | 0            | 0 | -0.031546914 |
| cov1_2_4_5_6_8_9_10  | 46.6092 | -215.018 | 0.4179494 | 0 | 0.017133658  | 0 | -0.044597465 |
| cov1_2_3_5_6_9_10_11 | 46.6149 | -215.021 | 0.4210187 | 0 | -0.040822344 | 0 | -0.029675968 |
| cov2_4_5_6_7_8_9_10  | 46.6214 | -215.024 | 0.4179535 | 0 | 0            | 0 | -0.038623969 |
| cov2_3_6_7_8_9_10_11 | 46.6291 | -215.028 | 0.420561  | 0 | 0            | 0 | -0.036852119 |
| cov1_2_3_4_5_8_9_10  | 46.6514 | -215.039 | 0.4186587 | 0 | -0.034547756 | 0 | -0.046733837 |
| cov1_2_3_4_5_7_9_10  | 46.6549 | -215.041 | 0.4186602 | 0 | -0.034647989 | 0 | -0.046743469 |
| cov1_2_3_4_8_9_10_11 | 46.695  | -215.061 | 0.4196351 | 0 | -0.063695237 | 0 | -0.040212915 |
| cov1_2_5_6_7_9_10_11 | 46.6964 | -215.061 | 0.4193559 | 0 | -0.006106913 | 0 | -0.027088053 |
| cov1_2_3_4_7_9_10_11 | 46.6976 | -215.062 | 0.4196397 | 0 | -0.063746556 | 0 | -0.040275034 |
| cov2_5_6_7_8_9_10_11 | 46.6985 | -215.062 | 0.419377  | 0 | 0            | 0 | -0.028182604 |
| cov1_2_5_6_8_9_10_11 | 46.6992 | -215.063 | 0.4193527 | 0 | -0.00678817  | 0 | -0.027084576 |
| cov1_2_3_4_7_8_9_10  | 46.7042 | -215.065 | 0.4193239 | 0 | -0.059613302 | 0 | -0.039527384 |
| cov1_2_5_6_7_8_9_10  | 46.7138 | -215.07  | 0.4189314 | 0 | -0.001422485 | 0 | -0.026353095 |
| cov1_2_3_4_5_9_10_11 | 46.7228 | -215.075 | 0.4197213 | 0 | -0.056650456 | 0 | -0.046055926 |
| cov2_3_4_5_8_9_10_11 | 46.7238 | -215.075 | 0.4182072 | 0 | 0            | 0 | -0.059514968 |
| cov2_3_4_5_7_8_9_10  | 46.7239 | -215.075 | 0.4181778 | 0 | 0            | 0 | -0.05926761  |
| cov2_3_4_5_7_9_10_11 | 46.7274 | -215.077 | 0.4182009 | 0 | 0            | 0 | -0.059513551 |
| cov1_2_3_7_8_9_10_11 | 46.7463 | -215.086 | 0.4199298 | 0 | -0.05896248  | 0 | -0.029485123 |
| cov1_2_3_5_8_9_10_11 | 46.7466 | -215.087 | 0.4198751 | 0 | -0.055997386 | 0 | -0.029296195 |
| cov1_2_3_5_7_9_10_11 | 46.7499 | -215.088 | 0.4198824 | 0 | -0.056206136 | 0 | -0.029318564 |
| cov1_3_4_6_8_9_10_11 | 46.7539 | -215.09  | 0.4193234 | 0 | -0.048107309 | 0 | 0            |
| cov1_3_4_6_7_9_10_11 | 46.7541 | -215.09  | 0.4193207 | 0 | -0.047783969 | 0 | 0            |
| cov1_3_5_6_8_9_10_11 | 46.7543 | -215.09  | 0.4191389 | 0 | -0.045810446 | 0 | 0            |
| cov1_3_5_6_7_9_10_11 | 46.7544 | -215.09  | 0.4191345 | 0 | -0.045368372 | 0 | 0            |
| cov1_2_3_5_7_8_9_10  | 46.7547 | -215.091 | 0.4195848 | 0 | -0.052204357 | 0 | -0.028768299 |
| cov1_3_6_7_8_9_10_11 | 46.7561 | -215.091 | 0.4191895 | 0 | -0.049994498 | 0 | 0            |
| cov1_3_4_5_6_8_9_10  | 46.7633 | -215.095 | 0.4189432 | 0 | -0.042256596 | 0 | 0            |
| cov1_3_4_5_6_7_9_10  | 46.7634 | -215.095 | 0.4189377 | 0 | -0.041792834 | 0 | 0            |
| cov1_3_5_6_7_8_9_10  | 46.7635 | -215.095 | 0.4188451 | 0 | -0.041617331 | 0 | 0            |
| cov1_3_4_6_7_8_9_10  | 46.7637 | -215.095 | 0.4190241 | 0 | -0.044297317 | 0 | 0            |
| cov1_2_4_6_7_9_10_11 | 46.769  | -215.098 | 0.4192013 | 0 | -0.026266032 | 0 | -0.029706793 |
| cov1_2_6_7_8_9_10_11 | 46.7699 | -215.098 | 0.4192755 | 0 | -0.025961675 | 0 | -0.028278734 |
| cov1_2_4_6_8_9_10_11 | 46.7721 | -215.099 | 0.4192009 | 0 | -0.026950518 | 0 | -0.029618319 |
| cov1_2_4_5_8_9_10_11 | 46.7817 | -215.104 | 0.4178707 | 0 | -0.017646811 | 0 | -0.045136151 |
| cov1_2_4_5_7_9_10_11 | 46.785  | -215.106 | 0.4178595 | 0 | -0.017473562 | 0 | -0.045207658 |
| cov1_2_4_6_7_8_9_10  | 46.79   | -215.108 | 0.4187516 | 0 | -0.021464758 | 0 | -0.028643512 |
| cov1_2_4_5_7_8_9_10  | 46.7911 | -215.109 | 0.4175589 | 0 | -0.013434894 | 0 | -0.044529256 |
| cov2_4_5_7_8_9_10_11 | 46.8018 | -215.114 | 0.4176354 | 0 | 0            | 0 | -0.052228269 |
| cov1_3_4_5_6_9_10_11 | 46.818  | -215.122 | 0.4199308 | 0 | -0.061260712 | 0 | 0            |
| cov2_4_6_7_8_9_10_11 | 46.8301 | -215.128 | 0.4193646 | 0 | 0            | 0 | -0.035951864 |
| cov3_4_5_6_7_8_9_10  | 46.8678 | -215.147 | 0.4184859 | 0 | 0            | 0 | 0            |

|                      |         |          |           |   |              |              |
|----------------------|---------|----------|-----------|---|--------------|--------------|
| cov3_4_5_6_7_9_10_11 | 46.8678 | -215.147 | 0.4184762 | 0 | 0            | 0            |
| cov3_5_6_7_8_9_10_11 | 46.868  | -215.147 | 0.4185356 | 0 | 0            | 0            |
| cov1_4_5_6_7_9_10_11 | 46.8693 | -215.148 | 0.418254  | 0 | -0.024940637 | 0            |
| cov1_5_6_7_8_9_10_11 | 46.8693 | -215.148 | 0.4181848 | 0 | -0.024833318 | 0            |
| cov3_4_5_6_8_9_10_11 | 46.8712 | -215.149 | 0.4184842 | 0 | 0            | 0            |
| cov1_4_5_6_8_9_10_11 | 46.8721 | -215.149 | 0.4182582 | 0 | -0.02564492  | 0            |
| cov1_4_5_6_7_8_9_10  | 46.8788 | -215.153 | 0.4179478 | 0 | -0.02105945  | 0            |
| cov1_2_5_7_8_9_10_11 | 46.8808 | -215.154 | 0.4187757 | 0 | -0.034866287 | -0.027612069 |
| cov4_5_6_7_8_9_10_11 | 46.9119 | -215.169 | 0.41803   | 0 | 0            | 0            |
| cov1_4_6_7_8_9_10_11 | 46.9169 | -215.172 | 0.4187459 | 0 | -0.039852286 | 0            |
| cov1_3_4_5_8_9_10_11 | 46.9462 | -215.186 | 0.4187037 | 0 | -0.075344466 | 0            |
| cov1_3_4_7_8_9_10_11 | 46.9462 | -215.186 | 0.4188272 | 0 | -0.078549952 | 0            |
| cov1_3_5_7_8_9_10_11 | 46.9474 | -215.187 | 0.4185298 | 0 | -0.075039556 | 0            |
| cov1_3_4_5_7_8_9_10  | 46.9487 | -215.188 | 0.4185382 | 0 | -0.072880564 | 0            |
| cov1_3_4_5_7_9_10_11 | 46.9497 | -215.188 | 0.4187116 | 0 | -0.075571615 | 0            |
| cov2_3_5_7_8_9_10_11 | 46.951  | -215.189 | 0.4191082 | 0 | 0            | -0.039238697 |
| cov1_2_4_7_8_9_10_11 | 46.9711 | -215.199 | 0.4186671 | 0 | -0.05802438  | -0.028937155 |
| cov3_4_6_7_8_9_10_11 | 46.9719 | -215.199 | 0.4193194 | 0 | 0            | 0            |
| cov1_4_5_7_8_9_10_11 | 47.0596 | -215.243 | 0.4177372 | 0 | -0.054787099 | 0            |
| cov2_3_4_5_6_7_10_11 | 47.2755 | -215.351 | 0.4182694 | 0 | 0            | -0.049664135 |
| cov2_3_4_5_6_8_10_11 | 47.2762 | -215.351 | 0.4182735 | 0 | 0            | -0.049785884 |
| cov1_2_3_4_5_6_7_10  | 47.3024 | -215.364 | 0.4177491 | 0 | 0.005477804  | -0.048493393 |
| cov1_2_3_4_5_6_8_10  | 47.3034 | -215.365 | 0.4177574 | 0 | 0.004841199  | -0.04845146  |
| cov2_3_4_5_6_7_8_10  | 47.3035 | -215.365 | 0.4177855 | 0 | 0            | -0.04699941  |
| cov2_3_4_7_8_9_10_11 | 47.3164 | -215.371 | 0.4192335 | 0 | 0            | -0.063162825 |
| cov1_2_3_4_6_8_10_11 | 47.3372 | -215.382 | 0.4190068 | 0 | -0.027279403 | -0.041875089 |
| cov1_2_3_4_6_7_10_11 | 47.3373 | -215.382 | 0.4190044 | 0 | -0.027012429 | -0.041873409 |
| cov3_4_5_7_8_9_10_11 | 47.3579 | -215.392 | 0.4165431 | 0 | 0            | 0            |
| cov1_2_3_4_6_7_8_10  | 47.3654 | -215.396 | 0.4184732 | 0 | -0.021434281 | -0.040673281 |
| cov1_2_3_4_5_6_10_11 | 47.3731 | -215.4   | 0.4191087 | 0 | -0.020485091 | -0.048101392 |
| cov1_2_4_5_6_9_10_11 | 47.3747 | -215.401 | 0.4188978 | 0 | -0.016176995 | -0.032946947 |
| cov1_2_4_5_6_7_10_11 | 47.3875 | -215.407 | 0.4172901 | 0 | 0.018466674  | -0.047579022 |
| cov1_2_3_5_6_7_10_11 | 47.3885 | -215.407 | 0.4192343 | 0 | -0.01934397  | -0.030803575 |
| cov1_2_3_5_6_8_10_11 | 47.3885 | -215.407 | 0.4192392 | 0 | -0.019797271 | -0.030813906 |
| cov1_2_3_6_7_8_10_11 | 47.39   | -215.408 | 0.4192983 | 0 | -0.023454278 | -0.031076738 |
| cov1_2_4_5_6_8_10_11 | 47.3919 | -215.409 | 0.4172944 | 0 | 0.017559141  | -0.047436114 |
| cov2_3_4_6_7_8_10_11 | 47.4013 | -215.414 | 0.4191275 | 0 | 0            | -0.047685457 |
| cov2_4_5_6_7_8_10_11 | 47.4044 | -215.415 | 0.4173911 | 0 | 0            | -0.041913437 |
| cov2_3_5_6_7_8_10_11 | 47.4074 | -215.417 | 0.4191307 | 0 | 0            | -0.033390091 |
| cov1_2_3_5_6_7_8_10  | 47.4131 | -215.42  | 0.4187044 | 0 | -0.013705534 | -0.029938555 |
| cov1_2_4_5_6_7_8_10  | 47.4136 | -215.42  | 0.4167782 | 0 | 0.024090357  | -0.04651559  |
| cov1_2_3_4_5_8_10_11 | 47.4511 | -215.439 | 0.4177953 | 0 | -0.029225732 | -0.049075489 |
| cov1_2_3_4_5_7_10_11 | 47.4544 | -215.44  | 0.417795  | 0 | -0.029287394 | -0.049088255 |
| cov1_2_3_4_5_7_8_10  | 47.4667 | -215.447 | 0.4174038 | 0 | -0.024067004 | -0.048240727 |
| cov1_2_5_6_7_8_10_11 | 47.4955 | -215.461 | 0.4182548 | 0 | -0.00063635  | -0.029256211 |
| cov2_3_4_5_7_8_10_11 | 47.4983 | -215.462 | 0.4172301 | 0 | 0            | -0.058251768 |
| cov1_2_3_4_7_8_10_11 | 47.5157 | -215.471 | 0.4185393 | 0 | -0.056974045 | -0.041163646 |

|                      |         |          |           |   |              |   |              |
|----------------------|---------|----------|-----------|---|--------------|---|--------------|
| cov1_2_3_5_7_8_10_11 | 47.5524 | -215.489 | 0.4187088 | 0 | -0.046505174 | 0 | -0.031268362 |
| cov1_2_4_5_7_8_10_11 | 47.5617 | -215.494 | 0.4168497 | 0 | -0.010587093 | 0 | -0.047056709 |
| cov1_2_4_6_7_8_10_11 | 47.5787 | -215.503 | 0.4181241 | 0 | -0.021802041 | 0 | -0.031282941 |
| cov1_3_4_5_6_7_10_11 | 47.6089 | -215.518 | 0.4180021 | 0 | -0.039192613 | 0 | 0            |
| cov1_3_4_5_6_8_10_11 | 47.609  | -215.518 | 0.4180122 | 0 | -0.039707976 | 0 | 0            |
| cov1_3_4_6_7_8_10_11 | 47.6104 | -215.518 | 0.4181477 | 0 | -0.043183669 | 0 | 0            |
| cov1_3_5_6_7_8_10_11 | 47.6112 | -215.519 | 0.4177862 | 0 | -0.038486284 | 0 | 0            |
| cov1_3_4_5_6_7_8_10  | 47.6231 | -215.525 | 0.4176237 | 0 | -0.034485557 | 0 | 0            |
| cov3_4_5_6_7_8_10_11 | 47.6926 | -215.56  | 0.4173572 | 0 | 0            | 0 | 0            |
| cov1_4_5_6_7_8_10_11 | 47.696  | -215.561 | 0.4171572 | 0 | -0.021273175 | 0 | 0            |
| cov2_3_4_5_6_7_9_11  | 47.7184 | -215.572 | 0.4189638 | 0 | 0            | 0 | -0.053351191 |
| cov2_3_4_5_6_8_9_11  | 47.7199 | -215.573 | 0.41897   | 0 | 0            | 0 | -0.053502156 |
| cov1_2_3_4_6_7_9_11  | 47.7337 | -215.58  | 0.4195419 | 0 | -0.027871556 | 0 | -0.045707187 |
| cov1_2_3_4_6_8_9_11  | 47.7338 | -215.58  | 0.4195447 | 0 | -0.028229614 | 0 | -0.045718767 |
| cov1_2_3_4_5_6_7_9   | 47.7469 | -215.587 | 0.4185177 | 0 | -0.005484892 | 0 | -0.049075923 |
| cov1_2_3_4_5_6_8_9   | 47.748  | -215.587 | 0.4185291 | 0 | -0.006233248 | 0 | -0.049016535 |
| cov2_3_4_5_6_7_8_9   | 47.7482 | -215.587 | 0.4184764 | 0 | 0            | 0 | -0.050627382 |
| cov1_2_3_4_6_7_8_9   | 47.769  | -215.598 | 0.4189387 | 0 | -0.021667896 | 0 | -0.044352806 |
| cov1_3_4_5_7_8_10_11 | 47.7774 | -215.602 | 0.4175408 | 0 | -0.067310412 | 0 | 0            |
| cov2_3_4_6_7_8_9_11  | 47.8017 | -215.614 | 0.4196597 | 0 | 0            | 0 | -0.051670488 |
| cov1_2_3_5_6_7_9_11  | 47.8113 | -215.619 | 0.4199972 | 0 | -0.029838776 | 0 | -0.032674472 |
| cov1_2_3_5_6_8_9_11  | 47.8113 | -215.619 | 0.4200053 | 0 | -0.030317337 | 0 | -0.032698116 |
| cov1_2_4_5_6_7_9_11  | 47.8116 | -215.619 | 0.4181718 | 0 | 0.005871163  | 0 | -0.048409834 |
| cov2_4_5_6_7_8_9_11  | 47.8131 | -215.62  | 0.4182041 | 0 | 0            | 0 | -0.046614281 |
| cov1_2_4_5_6_8_9_11  | 47.8158 | -215.621 | 0.4181757 | 0 | 0.004965408  | 0 | -0.048268025 |
| cov1_2_3_6_7_8_9_11  | 47.8161 | -215.621 | 0.4198908 | 0 | -0.023309891 | 0 | -0.032250666 |
| cov1_2_3_4_5_6_9_11  | 47.8204 | -215.623 | 0.4199868 | 0 | -0.033414062 | 0 | -0.048758879 |
| cov1_2_3_5_6_7_8_9   | 47.8435 | -215.635 | 0.4194195 | 0 | -0.023398422 | 0 | -0.031715357 |
| cov1_2_4_5_6_7_8_9   | 47.8455 | -215.636 | 0.4175966 | 0 | 0.012184016  | 0 | -0.047186843 |
| cov2_3_5_6_7_8_9_11  | 47.8563 | -215.641 | 0.4198333 | 0 | 0            | 0 | -0.036694868 |
| cov1_2_5_6_7_8_9_11  | 47.9065 | -215.666 | 0.4190671 | 0 | -0.012017486 | 0 | -0.031199377 |
| cov1_2_4_6_7_8_9_11  | 47.9128 | -215.67  | 0.4187703 | 0 | -0.023450892 | 0 | -0.036390561 |
| cov1_2_3_4_5_8_9_11  | 47.9257 | -215.676 | 0.4185478 | 0 | -0.04378861  | 0 | -0.049795168 |
| cov1_2_3_4_5_7_9_11  | 47.9297 | -215.678 | 0.4185482 | 0 | -0.043877562 | 0 | -0.049807481 |
| cov1_2_3_4_5_7_8_9   | 47.9465 | -215.686 | 0.418104  | 0 | -0.037914893 | 0 | -0.048834432 |
| cov1_2_3_4_7_8_9_11  | 47.949  | -215.688 | 0.4190024 | 0 | -0.060676665 | 0 | -0.044968208 |
| cov1_2_3_5_7_8_9_11  | 48.0127 | -215.72  | 0.419388  | 0 | -0.05982267  | 0 | -0.03325491  |
| cov1_2_4_5_7_8_9_11  | 48.0231 | -215.725 | 0.417633  | 0 | -0.026043429 | 0 | -0.047906117 |
| cov2_3_4_5_7_8_9_11  | 48.0312 | -215.729 | 0.4176823 | 0 | 0            | 0 | -0.063537158 |
| cov1_3_4_5_6_7_9_11  | 48.0552 | -215.741 | 0.4188569 | 0 | -0.051641864 | 0 | 0            |
| cov1_3_4_5_6_8_9_11  | 48.0552 | -215.741 | 0.4188654 | 0 | -0.052181125 | 0 | 0            |
| cov1_2_3_4_5_6_7_11  | 48.0588 | -215.743 | 0.421225  | 0 | -0.036696744 | 0 | -0.050719385 |
| cov1_2_3_4_5_6_8_11  | 48.0593 | -215.743 | 0.4212357 | 0 | -0.037398508 | 0 | -0.050673045 |
| cov1_3_4_6_7_8_9_11  | 48.0598 | -215.743 | 0.4186196 | 0 | -0.045487868 | 0 | 0            |
| cov1_2_3_4_6_7_8_11  | 48.0609 | -215.744 | 0.4211198 | 0 | -0.032032586 | 0 | -0.052341106 |
| cov1_3_5_6_7_8_9_11  | 48.0624 | -215.744 | 0.4184965 | 0 | -0.050404937 | 0 | 0            |
| cov1_3_4_5_6_7_8_9   | 48.0752 | -215.751 | 0.418409  | 0 | -0.046042177 | 0 | 0            |

|                        |         |          |           |   |              |   |              |
|------------------------|---------|----------|-----------|---|--------------|---|--------------|
| cov1_2_3_4_5_6_7_8     | 48.1047 | -215.766 | 0.4205848 | 0 | -0.029684299 | 0 | -0.049311558 |
| cov2_3_4_5_6_7_8_11    | 48.1223 | -215.774 | 0.4210483 | 0 | 0            | 0 | -0.060819953 |
| cov1_4_5_6_7_8_9_11    | 48.1307 | -215.779 | 0.4180594 | 0 | -0.034771897 | 0 | 0            |
| cov1_2_3_5_6_7_8_11    | 48.1375 | -215.782 | 0.421942  | 0 | -0.052060724 | 0 | -0.034955567 |
| cov1_2_4_5_6_7_8_11    | 48.1505 | -215.788 | 0.4203096 | 0 | -0.019310025 | 0 | -0.04889141  |
| cov3_4_5_6_7_8_9_11    | 48.2002 | -215.813 | 0.4180072 | 0 | 0            | 0 | 0            |
| cov1_3_4_5_7_8_9_11    | 48.2614 | -215.844 | 0.4183138 | 0 | -0.082672137 | 0 | 0            |
| cov1_2_3_4_5_7_8_11    | 48.3703 | -215.898 | 0.4208226 | 0 | -0.079337471 | 0 | -0.050144028 |
| cov1_3_4_5_6_7_8_11    | 48.4069 | -215.917 | 0.4209937 | 0 | -0.076979795 | 0 | 0            |
| cov2_3_4_5_6_7_9_10_11 | 53.4904 | -214.936 | 0.4194247 | 0 | 0            | 0 | -0.049932707 |
| cov2_3_4_5_6_8_9_10_11 | 53.4913 | -214.936 | 0.4194217 | 0 | 0            | 0 | -0.050066394 |
| cov1_2_3_4_5_6_7_9_10  | 53.5074 | -214.944 | 0.4190643 | 0 | -0.003208795 | 0 | -0.046969218 |
| cov2_3_4_5_6_7_8_9_10  | 53.5077 | -214.945 | 0.4190405 | 0 | 0            | 0 | -0.047876036 |
| cov1_2_3_4_5_6_8_9_10  | 53.5079 | -214.945 | 0.4190751 | 0 | -0.003856378 | 0 | -0.046899722 |
| cov1_2_3_4_6_8_9_10_11 | 53.5367 | -214.959 | 0.420174  | 0 | -0.032317259 | 0 | -0.040995697 |
| cov1_2_3_4_6_7_9_10_11 | 53.5369 | -214.959 | 0.4201681 | 0 | -0.03208414  | 0 | -0.041006004 |
| cov1_2_3_4_6_7_8_9_10  | 53.5575 | -214.97  | 0.4196688 | 0 | -0.027394823 | 0 | -0.039963125 |
| cov1_2_3_4_5_6_9_10_11 | 53.5683 | -214.975 | 0.4202753 | 0 | -0.026582068 | 0 | -0.046533722 |
| cov1_2_3_6_7_8_9_10_11 | 53.6042 | -214.993 | 0.4204856 | 0 | -0.027989674 | 0 | -0.02881178  |
| cov1_2_3_5_6_8_9_10_11 | 53.6044 | -214.993 | 0.4204834 | 0 | -0.027887476 | 0 | -0.028806106 |
| cov1_2_3_5_6_7_9_10_11 | 53.6046 | -214.993 | 0.4204811 | 0 | -0.027510353 | 0 | -0.028790118 |
| cov1_2_3_5_6_7_8_9_10  | 53.6223 | -215.002 | 0.4200692 | 0 | -0.022747962 | 0 | -0.028030564 |
| cov2_3_4_6_7_8_9_10_11 | 53.627  | -215.004 | 0.4203092 | 0 | 0            | 0 | -0.0478933   |
| cov1_2_4_5_6_7_9_10_11 | 53.6298 | -215.006 | 0.4183898 | 0 | 0.013045715  | 0 | -0.045639665 |
| cov1_2_4_5_6_8_9_10_11 | 53.6342 | -215.008 | 0.4183897 | 0 | 0.01221878   | 0 | -0.045531333 |
| cov2_4_5_6_7_8_9_10_11 | 53.6382 | -215.01  | 0.4184628 | 0 | 0            | 0 | -0.041641926 |
| cov2_3_5_6_7_8_9_10_11 | 53.6429 | -215.012 | 0.4203245 | 0 | 0            | 0 | -0.032478551 |
| cov1_2_4_5_6_7_8_9_10  | 53.649  | -215.015 | 0.4179509 | 0 | 0.017909706  | 0 | -0.044753106 |
| cov1_2_3_4_5_8_9_10_11 | 53.6863 | -215.034 | 0.4189792 | 0 | -0.038701867 | 0 | -0.047395008 |
| cov1_2_3_4_5_7_9_10_11 | 53.6898 | -215.036 | 0.4189779 | 0 | -0.038842051 | 0 | -0.047396473 |
| cov1_2_3_4_5_7_8_9_10  | 53.6959 | -215.039 | 0.4186667 | 0 | -0.034733901 | 0 | -0.04670484  |
| cov1_2_3_4_7_8_9_10_11 | 53.7382 | -215.06  | 0.4196476 | 0 | -0.063818159 | 0 | -0.040254776 |
| cov1_2_5_6_7_8_9_10_11 | 53.741  | -215.061 | 0.4193557 | 0 | -0.00624379  | 0 | -0.027083295 |
| cov2_3_4_5_7_8_9_10_11 | 53.7687 | -215.075 | 0.4182075 | 0 | 0            | 0 | -0.059516708 |
| cov1_2_3_5_7_8_9_10_11 | 53.7904 | -215.086 | 0.4198904 | 0 | -0.056304831 | 0 | -0.029310625 |
| cov1_3_4_5_6_8_9_10_11 | 53.7984 | -215.09  | 0.4192525 | 0 | -0.04625171  | 0 | 0            |
| cov1_3_4_5_6_7_9_10_11 | 53.7986 | -215.09  | 0.4192457 | 0 | -0.045807971 | 0 | 0            |
| cov1_3_4_6_7_8_9_10_11 | 53.7987 | -215.09  | 0.4193166 | 0 | -0.047941558 | 0 | 0            |
| cov1_3_5_6_7_8_9_10_11 | 53.7989 | -215.09  | 0.4191347 | 0 | -0.04553613  | 0 | 0            |
| cov1_3_4_5_6_7_8_9_10  | 53.8079 | -215.095 | 0.418938  | 0 | -0.041999498 | 0 | 0            |
| cov1_2_4_6_7_8_9_10_11 | 53.8137 | -215.098 | 0.4192007 | 0 | -0.026387422 | 0 | -0.029684468 |
| cov1_2_4_5_7_8_9_10_11 | 53.8262 | -215.104 | 0.4178672 | 0 | -0.017563999 | 0 | -0.045172192 |
| cov3_4_5_6_7_8_9_10_11 | 53.9127 | -215.147 | 0.4184764 | 0 | 0            | 0 | 0            |
| cov1_4_5_6_7_8_9_10_11 | 53.9139 | -215.148 | 0.4182539 | 0 | -0.025084976 | 0 | 0            |
| cov1_3_4_5_7_8_9_10_11 | 53.9901 | -215.186 | 0.4187208 | 0 | -0.075671142 | 0 | 0            |
| cov2_3_4_5_6_7_8_10_11 | 54.3202 | -215.351 | 0.4182681 | 0 | 0            | 0 | -0.049687891 |
| cov1_2_3_4_5_6_7_10_11 | 54.3204 | -215.351 | 0.4182738 | 0 | -0.000378465 | 0 | -0.049568509 |



|                            |         |          |           |   |              |   |              |
|----------------------------|---------|----------|-----------|---|--------------|---|--------------|
| cov1_2_3_4_5_6_8_10_11     | 54.321  | -215.351 | 0.4182848 | 0 | -0.001050083 | 0 | -0.049519613 |
| cov1_2_3_4_5_6_7_8_10      | 54.3471 | -215.364 | 0.417747  | 0 | 0.00535231   | 0 | -0.048483602 |
| cov1_2_3_4_6_7_8_10_11     | 54.3819 | -215.382 | 0.4190045 | 0 | -0.02714948  | 0 | -0.041865086 |
| cov1_2_4_5_6_7_8_10_11     | 54.4323 | -215.407 | 0.4172901 | 0 | 0.018357511  | 0 | -0.047570448 |
| cov1_2_3_5_6_7_8_10_11     | 54.4331 | -215.407 | 0.4192337 | 0 | -0.019499969 | 0 | -0.030803391 |
| cov1_2_3_4_5_7_8_10_11     | 54.4957 | -215.439 | 0.4178036 | 0 | -0.029397985 | 0 | -0.04905652  |
| cov1_3_4_5_6_7_8_10_11     | 54.6534 | -215.517 | 0.4180176 | 0 | -0.039472497 | 0 | 0            |
| cov1_2_3_4_5_6_7_9_11      | 54.757  | -215.569 | 0.4191089 | 0 | -0.012088617 | 0 | -0.050296702 |
| cov1_2_3_4_5_6_8_9_11      | 54.7576 | -215.57  | 0.419118  | 0 | -0.012771202 | 0 | -0.050253505 |
| cov2_3_4_5_6_7_8_9_11      | 54.7632 | -215.572 | 0.418963  | 0 | 0            | 0 | -0.053369456 |
| cov1_2_3_4_6_7_8_9_11      | 54.7783 | -215.58  | 0.419542  | 0 | -0.028015543 | 0 | -0.045699108 |
| cov1_2_3_4_5_6_7_8_9       | 54.7916 | -215.587 | 0.4185184 | 0 | -0.005624095 | 0 | -0.049068744 |
| cov1_2_3_5_6_7_8_9_11      | 54.8559 | -215.619 | 0.4199995 | 0 | -0.029994462 | 0 | -0.032687232 |
| cov1_2_4_5_6_7_8_9_11      | 54.8563 | -215.619 | 0.4181718 | 0 | 0.005749187  | 0 | -0.048400236 |
| cov1_2_3_4_5_7_8_9_11      | 54.9703 | -215.676 | 0.4185581 | 0 | -0.044001743 | 0 | -0.049771739 |
| cov1_3_4_5_6_7_8_9_11      | 55.0996 | -215.741 | 0.4188579 | 0 | -0.051813389 | 0 | 0            |
| cov1_2_3_4_5_6_7_8_11      | 55.1034 | -215.742 | 0.421225  | 0 | -0.036871256 | 0 | -0.050710743 |
| cov1_2_3_4_5_6_7_9_10_11   | 60.5324 | -214.935 | 0.4195178 | 0 | -0.008233434 | 0 | -0.047882969 |
| cov1_2_3_4_5_6_8_9_10_11   | 60.5327 | -214.935 | 0.4195274 | 0 | -0.008817478 | 0 | -0.047841082 |
| cov2_3_4_5_6_7_8_9_10_11   | 60.5352 | -214.936 | 0.4194172 | 0 | 0            | 0 | -0.049980092 |
| cov1_2_3_4_5_6_7_8_9_10    | 60.552  | -214.944 | 0.4190664 | 0 | -0.003372458 | 0 | -0.046942068 |
| cov1_2_3_4_6_7_8_9_10_11   | 60.5815 | -214.959 | 0.4201745 | 0 | -0.032232398 | 0 | -0.040974907 |
| cov1_2_3_5_6_7_8_9_10_11   | 60.6491 | -214.993 | 0.4204806 | 0 | -0.027678719 | 0 | -0.028790762 |
| cov1_2_4_5_6_7_8_9_10_11   | 60.6745 | -215.006 | 0.4183896 | 0 | 0.013015993  | 0 | -0.0456547   |
| cov1_2_3_4_5_7_8_9_10_11   | 60.7306 | -215.034 | 0.4189852 | 0 | -0.038961632 | 0 | -0.047362332 |
| cov1_3_4_5_6_7_8_9_10_11   | 60.8431 | -215.09  | 0.4192471 | 0 | -0.045982595 | 0 | 0            |
| cov1_2_3_4_5_6_7_8_10_11   | 61.3651 | -215.351 | 0.4182745 | 0 | -0.000511833 | 0 | -0.049559237 |
| cov1_2_3_4_5_6_7_8_9_11    | 61.8016 | -215.569 | 0.4191093 | 0 | -0.012233087 | 0 | -0.050285544 |
| cov1_2_3_4_5_6_7_8_9_10_11 | 67.5771 | -214.934 | 0.4195161 | 0 | -0.008464262 | 0 | -0.04786875  |

| SE | bsnp_rs7817754 | SE | bsnp_rs2047962 | SE | bsnp_rs6469668 | SE | bsnp_rs6469667 | SE | bsnp_rs7832958 |
|----|----------------|----|----------------|----|----------------|----|----------------|----|----------------|
| 0  | 0              | 0  | 0              | 0  | 0              | 0  | 0              | 0  | 0              |
| 0  | 0              | 0  | 0              | 0  | 0              | 0  | 0              | 0  | 0              |
| 0  | 0              | 0  | 0              | 0  | 0              | 0  | -0.090008998   | 0  | 0              |
| 0  | 0              | 0  | 0              | 0  | 0              | 0  | 0              | 0  | 0              |
| 0  | 0              | 0  | 0              | 0  | -0.074746658   | 0  | 0              | 0  | 0              |
| 0  | 0              | 0  | -0.069118853   | 0  | 0              | 0  | 0              | 0  | 0              |
| 0  | 0              | 0  | 0              | 0  | 0              | 0  | 0              | 0  | 0              |
| 0  | 0              | 0  | 0              | 0  | 0              | 0  | 0              | 0  | 0              |
| 0  | 0              | 0  | 0              | 0  | 0              | 0  | 0              | 0  | 0              |
| 0  | 0              | 0  | 0              | 0  | 0              | 0  | 0              | 0  | 0              |
| 0  | 0              | 0  | 0              | 0  | 0              | 0  | 0              | 0  | 0              |
| 0  | 0              | 0  | 0              | 0  | 0              | 0  | 0              | 0  | 0.071097194    |
| 0  | 0              | 0  | 0              | 0  | 0              | 0  | 0              | 0  | 0              |
| 0  | 0              | 0  | 0              | 0  | 0              | 0  | -0.08823132    | 0  | 0.062838609    |
| 0  | 0              | 0  | 0              | 0  | 0              | 0  | -0.088123195   | 0  | 0              |
| 0  | 0              | 0  | 0              | 0  | 0              | 0  | 0              | 0  | 0              |
| 0  | 0              | 0  | 0              | 0  | 0              | 0  | 0              | 0  | 0.059494528    |
| 0  | 0              | 0  | 0              | 0  | 0              | 0  | -0.073892587   | 0  | 0              |
| 0  | 0              | 0  | 0              | 0  | -0.066191905   | 0  | 0              | 0  | 0              |
| 0  | 0              | 0  | 0              | 0  | 0              | 0  | 0              | 0  | 0              |
| 0  | 0.017058073    | 0  | 0              | 0  | 0              | 0  | 0              | 0  | 0              |
| 0  | 0              | 0  | 0              | 0  | 0              | 0  | 0              | 0  | 0              |
| 0  | 0.03384585     | 0  | 0              | 0  | 0              | 0  | 0              | 0  | 0              |
| 0  | 0.034285546    | 0  | 0              | 0  | 0              | 0  | -0.093526646   | 0  | 0              |
| 0  | 0              | 0  | 0              | 0  | 0              | 0  | -0.058720941   | 0  | 0              |
| 0  | 0              | 0  | 0              | 0  | 0              | 0  | -0.077458201   | 0  | 0              |
| 0  | 0              | 0  | 0              | 0  | 0              | 0  | 0              | 0  | 0              |
| 0  | 0              | 0  | 0              | 0  | 0              | 0  | 0              | 0  | 0.063395063    |
| 0  | 0              | 0  | 0              | 0  | 0              | 0  | -0.044556229   | 0  | 0              |
| 0  | 0              | 0  | 0              | 0  | 0              | 0  | 0              | 0  | 0              |
| 0  | 0              | 0  | 0              | 0  | 0              | 0  | 0              | 0  | 0              |
| 0  | 0              | 0  | 0              | 0  | 0              | 0  | 0              | 0  | 0              |
| 0  | 0              | 0  | -0.059911581   | 0  | 0              | 0  | 0              | 0  | 0              |
| 0  | 0              | 0  | 0              | 0  | 0.014609073    | 0  | 0              | 0  | 0              |
| 0  | 0              | 0  | -0.015149302   | 0  | 0              | 0  | -0.079620791   | 0  | 0              |
| 0  | 0              | 0  | 0              | 0  | -0.066033481   | 0  | 0              | 0  | 0              |
| 0  | 0              | 0  | -0.006144401   | 0  | 0              | 0  | 0              | 0  | 0              |
| 0  | 0              | 0  | 0              | 0  | 0              | 0  | -0.096777989   | 0  | 0              |
| 0  | 0              | 0  | 0              | 0  | -0.010196972   | 0  | -0.081918171   | 0  | 0              |
| 0  | 0.033144344    | 0  | 0              | 0  | 0              | 0  | 0              | 0  | 0              |
| 0  | 0              | 0  | 0              | 0  | -0.024496802   | 0  | 0              | 0  | 0              |
| 0  | 0              | 0  | -0.060160966   | 0  | 0              | 0  | 0              | 0  | 0              |
| 0  | 0              | 0  | 0              | 0  | 0              | 0  | 0              | 0  | 0              |
| 0  | 0              | 0  | -0.001045563   | 0  | 0              | 0  | 0              | 0  | 0              |
| 0  | 0              | 0  | 0              | 0  | -0.073684689   | 0  | 0              | 0  | 0              |
| 0  | 0              | 0  | 0              | 0  | -0.073660141   | 0  | 0              | 0  | 0.067120417    |

|   |              |   |              |   |              |   |              |   |             |
|---|--------------|---|--------------|---|--------------|---|--------------|---|-------------|
| 0 | 0            | 0 | 0            | 0 | 0            | 0 | 0            | 0 | 0           |
| 0 | 0            | 0 | 0            | 0 | 0            | 0 | 0            | 0 | 0           |
| 0 | 0            | 0 | 0            | 0 | 0            | 0 | 0            | 0 | 0.086894554 |
| 0 | 0            | 0 | 0            | 0 | 0            | 0 | 0            | 0 | 0.059898406 |
| 0 | 0            | 0 | 0            | 0 | 0            | 0 | 0            | 0 | 0           |
| 0 | 0            | 0 | 0            | 0 | -0.061947235 | 0 | 0            | 0 | 0           |
| 0 | 0            | 0 | 0            | 0 | 0            | 0 | 0            | 0 | 0           |
| 0 | 0            | 0 | -0.065256085 | 0 | 0            | 0 | 0            | 0 | 0           |
| 0 | 0            | 0 | -0.065241966 | 0 | 0            | 0 | 0            | 0 | 0.056076182 |
| 0 | 0            | 0 | -0.019029542 | 0 | -0.05831997  | 0 | 0            | 0 | 0           |
| 0 | 0.041564166  | 0 | 0            | 0 | 0            | 0 | 0            | 0 | 0           |
| 0 | 0.007814836  | 0 | 0            | 0 | -0.074220678 | 0 | 0            | 0 | 0           |
| 0 | 0            | 0 | -0.051423364 | 0 | 0            | 0 | 0            | 0 | 0           |
| 0 | 0            | 0 | 0            | 0 | 0            | 0 | 0            | 0 | 0           |
| 0 | 0            | 0 | 0            | 0 | 0            | 0 | 0            | 0 | 0           |
| 0 | 0            | 0 | 0            | 0 | 0            | 0 | 0            | 0 | 0.061118608 |
| 0 | 0.002870123  | 0 | -0.06879869  | 0 | 0            | 0 | 0            | 0 | 0           |
| 0 | 0.038443207  | 0 | 0            | 0 | 0            | 0 | 0            | 0 | 0           |
| 0 | 0.038084249  | 0 | 0            | 0 | 0            | 0 | 0            | 0 | 0           |
| 0 | -0.032301246 | 0 | 0            | 0 | 0            | 0 | 0            | 0 | 0           |
| 0 | -0.032710712 | 0 | 0            | 0 | 0            | 0 | 0            | 0 | 0.10049296  |
| 0 | 0.045146939  | 0 | 0            | 0 | 0            | 0 | 0            | 0 | 0           |
| 0 | 0            | 0 | 0            | 0 | 0            | 0 | 0            | 0 | 0           |
| 0 | 0            | 0 | 0            | 0 | 0            | 0 | 0            | 0 | 0           |
| 0 | 0            | 0 | 0            | 0 | 0            | 0 | 0            | 0 | 0.055392987 |
| 0 | 0.045160904  | 0 | 0            | 0 | 0            | 0 | -0.075297367 | 0 | 0           |
| 0 | 0            | 0 | 0            | 0 | 0            | 0 | -0.07345581  | 0 | 0.058388636 |
| 0 | 0            | 0 | 0            | 0 | 0            | 0 | -0.073348772 | 0 | 0           |
| 0 | 0            | 0 | 0            | 0 | 0            | 0 | 0            | 0 | 0.011930236 |
| 0 | 0            | 0 | 0            | 0 | 0            | 0 | -0.079269695 | 0 | 0           |
| 0 | 0            | 0 | 0            | 0 | -0.065689945 | 0 | 0            | 0 | 0           |
| 0 | 0            | 0 | 0            | 0 | -0.06565843  | 0 | 0            | 0 | 0.057887279 |
| 0 | 0.046015351  | 0 | 0            | 0 | 0            | 0 | 0            | 0 | 0           |
| 0 | 0            | 0 | 0            | 0 | -0.070173361 | 0 | 0            | 0 | 0           |
| 0 | 0            | 0 | 0            | 0 | 0            | 0 | 0            | 0 | 0           |
| 0 | 0            | 0 | 0            | 0 | 0            | 0 | 0            | 0 | 0.057972066 |
| 0 | 0            | 0 | 0            | 0 | 0            | 0 | -0.057661852 | 0 | 0.062125181 |
| 0 | 0            | 0 | 0            | 0 | 0            | 0 | -0.057355327 | 0 | 0           |
| 0 | 0            | 0 | 0            | 0 | 0            | 0 | 0            | 0 | 0           |
| 0 | 0            | 0 | 0            | 0 | 0            | 0 | 0            | 0 | 0.05661169  |
| 0 | 0            | 0 | 0            | 0 | 0            | 0 | -0.077057307 | 0 | 0.059721508 |
| 0 | 0            | 0 | 0            | 0 | 0            | 0 | -0.07694605  | 0 | 0           |
| 0 | 0.042032966  | 0 | 0            | 0 | 0            | 0 | 0            | 0 | 0           |
| 0 | 0            | 0 | 0            | 0 | 0            | 0 | -0.046195469 | 0 | 0           |
| 0 | 0            | 0 | 0            | 0 | 0            | 0 | 0            | 0 | 0           |
| 0 | 0.0421094    | 0 | 0            | 0 | 0            | 0 | -0.078770971 | 0 | 0           |
| 0 | 0            | 0 | 0            | 0 | 0            | 0 | -0.047513313 | 0 | 0.060767521 |

|   |             |   |              |   |              |   |              |   |              |
|---|-------------|---|--------------|---|--------------|---|--------------|---|--------------|
| 0 | 0           | 0 | 0            | 0 | 0            | 0 | -0.046744795 | 0 | 0            |
| 0 | 0           | 0 | 0            | 0 | -0.039939283 | 0 | 0            | 0 | 0            |
| 0 | 0           | 0 | 0            | 0 | 0            | 0 | 0            | 0 | 0            |
| 0 | 0           | 0 | 0            | 0 | -0.03445074  | 0 | -0.042841404 | 0 | 0            |
| 0 | 0           | 0 | 0            | 0 | 0            | 0 | 0            | 0 | 0            |
| 0 | 0           | 0 | 0            | 0 | 0            | 0 | 0            | 0 | 0.060188954  |
| 0 | 0.030084009 | 0 | 0            | 0 | -0.063329183 | 0 | 0            | 0 | 0            |
| 0 | 0           | 0 | -0.026130456 | 0 | 0            | 0 | -0.053967586 | 0 | 0            |
| 0 | 0           | 0 | 0            | 0 | 0            | 0 | -0.033586984 | 0 | 0            |
| 0 | 0           | 0 | -0.020266775 | 0 | 0            | 0 | 0            | 0 | 0            |
| 0 | 0           | 0 | 0            | 0 | 0            | 0 | 0            | 0 | 0            |
| 0 | 0           | 0 | 0            | 0 | -0.025740617 | 0 | 0            | 0 | 0            |
| 0 | 0           | 0 | 0            | 0 | 0            | 0 | 0            | 0 | 0            |
| 0 | 0           | 0 | 0            | 0 | 0            | 0 | 0            | 0 | 0.059212232  |
| 0 | 0.035830827 | 0 | 0            | 0 | 0            | 0 | -0.060950285 | 0 | 0            |
| 0 | 0.043081026 | 0 | 0            | 0 | 0            | 0 | 0            | 0 | 0            |
| 0 | 0           | 0 | -0.009444954 | 0 | 0            | 0 | -0.081799809 | 0 | 0.061270204  |
| 0 | 0           | 0 | 0            | 0 | -0.011219693 | 0 | -0.079322087 | 0 | 0.063067415  |
| 0 | 0           | 0 | -0.00969484  | 0 | 0            | 0 | -0.081522739 | 0 | 0            |
| 0 | 0           | 0 | 0            | 0 | -0.011537649 | 0 | -0.078958772 | 0 | 0            |
| 0 | 0.004168796 | 0 | 0            | 0 | 0            | 0 | -0.088767217 | 0 | 0.059043455  |
| 0 | 0           | 0 | 0            | 0 | 0            | 0 | -0.085993298 | 0 | 0.063767703  |
| 0 | 0           | 0 | 0            | 0 | 0            | 0 | -0.08827831  | 0 | 0.086195329  |
| 0 | 0.004734984 | 0 | 0            | 0 | 0            | 0 | -0.088738629 | 0 | 0            |
| 0 | 0           | 0 | 0            | 0 | 0            | 0 | -0.085851648 | 0 | 0            |
| 0 | 0           | 0 | 0            | 0 | 0.010141937  | 0 | 0            | 0 | 0            |
| 0 | 0           | 0 | 0            | 0 | -0.065589503 | 0 | 0            | 0 | 0            |
| 0 | 0           | 0 | 0            | 0 | 0.010217964  | 0 | 0            | 0 | 0.058869183  |
| 0 | 0           | 0 | 0            | 0 | 0            | 0 | 0            | 0 | 0            |
| 0 | 0           | 0 | 0            | 0 | -0.065555692 | 0 | 0            | 0 | 0.059376667  |
| 0 | 0.006435706 | 0 | 0            | 0 | 0            | 0 | 0            | 0 | 0            |
| 0 | 0           | 0 | 0            | 0 | 0            | 0 | 0            | 0 | 0.05726914   |
| 0 | 0.006431393 | 0 | 0            | 0 | 0            | 0 | 0            | 0 | 0.053602353  |
| 0 | 0           | 0 | -0.001012441 | 0 | 0            | 0 | 0            | 0 | 0            |
| 0 | 0           | 0 | 0            | 0 | 0            | 0 | 0            | 0 | -0.002646347 |
| 0 | 0           | 0 | -0.000971445 | 0 | 0            | 0 | 0            | 0 | 0.05936546   |
| 0 | 0           | 0 | 0            | 0 | 0            | 0 | -0.048885922 | 0 | 0            |
| 0 | 0           | 0 | 0            | 0 | 0            | 0 | -0.079649249 | 0 | 0            |
| 0 | 0.046332619 | 0 | 0            | 0 | 0.043698699  | 0 | 0            | 0 | 0            |
| 0 | 0.034843935 | 0 | 0            | 0 | 0            | 0 | -0.046978152 | 0 | 0            |
| 0 | 0           | 0 | -0.011984857 | 0 | -0.055901283 | 0 | 0            | 0 | 0            |
| 0 | 0.03485564  | 0 | 0            | 0 | 0            | 0 | 0            | 0 | 0            |
| 0 | 0           | 0 | 0            | 0 | -0.067717156 | 0 | 0            | 0 | 0            |
| 0 | 0           | 0 | 0            | 0 | 0            | 0 | 0            | 0 | 0            |
| 0 | 0           | 0 | -0.020836707 | 0 | 0            | 0 | 0            | 0 | 0            |
| 0 | 0           | 0 | 0            | 0 | 0            | 0 | -0.036476693 | 0 | 0            |
| 0 | 0           | 0 | -0.062485781 | 0 | 0            | 0 | 0            | 0 | 0            |

|   |             |   |              |   |              |              |              |             |
|---|-------------|---|--------------|---|--------------|--------------|--------------|-------------|
| 0 | 0           | 0 | -0.056913012 | 0 | 0            | 0            | 0            | 0           |
| 0 | 0           | 0 | -0.056884216 | 0 | 0            | 0            | 0            | 0.048164612 |
| 0 | 0           | 0 | 0            | 0 | 0            | 0            | 0            | 0           |
| 0 | 0           | 0 | -0.023279521 | 0 | 0            | -0.059635918 | 0            | 0           |
| 0 | 0           | 0 | 0            | 0 | -0.027502154 | 0            | -0.052623472 | 0           |
| 0 | 0           | 0 | -0.016743913 | 0 | 0            | 0            | 0            | 0           |
| 0 | 0           | 0 | 0            | 0 | 0            | 0            | 0            | 0           |
| 0 | 0           | 0 | 0            | 0 | -0.035482407 | 0            | 0            | 0           |
| 0 | 0           | 0 | 0            | 0 | 0            | -0.068765745 | 0            | 0           |
| 0 | 0           | 0 | 0            | 0 | -0.025187055 | 0            | 0            | 0           |
| 0 | 0           | 0 | 0            | 0 | -0.025128303 | 0            | 0            | 0.063762375 |
| 0 | 0.031453121 | 0 | 0            | 0 | 0            | 0            | 0            | 0           |
| 0 | 0           | 0 | 0            | 0 | -0.013239118 | 0            | 0            | 0           |
| 0 | 0.036878723 | 0 | 0.008785086  | 0 | 0            | 0            | 0            | 0           |
| 0 | 0           | 0 | 0            | 0 | 0            | -0.043026622 | 0            | 0           |
| 0 | 0.032928212 | 0 | -0.00400599  | 0 | 0            | -0.090640572 | 0            | 0           |
| 0 | 0           | 0 | 0.007772254  | 0 | 0            | -0.059772495 | 0            | 0           |
| 0 | 0           | 0 | 0            | 0 | 0            | -0.048054613 | 0            | 0           |
| 0 | 0.03532923  | 0 | 0            | 0 | 0.003782508  | 0            | -0.096635371 | 0           |
| 0 | 0           | 0 | 0            | 0 | 0            | -0.083747301 | 0            | 0           |
| 0 | 0.033865213 | 0 | 0            | 0 | 0            | -0.095155193 | 0            | 0           |
| 0 | 0           | 0 | 0            | 0 | 0            | 0            | 0            | 0           |
| 0 | 0           | 0 | 0            | 0 | 0            | 0            | 0            | 0.0681682   |
| 0 | 0           | 0 | 0            | 0 | 0.003776918  | 0            | -0.060745723 | 0           |
| 0 | 0           | 0 | 0            | 0 | 0            | 0            | 0            | 0           |
| 0 | 0.026307497 | 0 | -0.056157052 | 0 | 0            | 0            | 0            | 0           |
| 0 | 0           | 0 | 0.007457413  | 0 | 0            | 0            | 0            | 0           |
| 0 | 0           | 0 | 0.007542755  | 0 | 0            | 0            | 0            | 0.064574106 |
| 0 | 0.001677716 | 0 | 0            | 0 | 0            | 0            | 0            | 0           |
| 0 | 0           | 0 | 0            | 0 | 0            | 0            | 0            | 0.006078451 |
| 0 | 0.001573041 | 0 | 0            | 0 | 0            | 0            | 0            | 0.061963704 |
| 0 | 0.026587202 | 0 | 0            | 0 | -0.063390567 | 0            | 0            | 0           |
| 0 | 0           | 0 | 0            | 0 | 0.014155092  | 0            | -0.044336082 | 0           |
| 0 | 0           | 0 | 0            | 0 | 0.015858116  | 0            | 0            | 0           |
| 0 | 0           | 0 | -0.005309984 | 0 | 0            | -0.044281149 | 0            | 0           |
| 0 | 0           | 0 | 0.00893588   | 0 | 0            | 0            | 0            | 0           |
| 0 | 0           | 0 | -0.016155204 | 0 | 0            | 0            | 0            | 0           |
| 0 | 0           | 0 | -0.052305893 | 0 | 0            | 0            | 0            | 0           |
| 0 | 0           | 0 | 0            | 0 | 0.014453242  | 0            | 0            | 0           |
| 0 | 0           | 0 | 0            | 0 | 0            | 0            | 0            | 0           |
| 0 | 0           | 0 | -0.023302354 | 0 | 0.035632618  | 0            | 0            | 0           |
| 0 | 0           | 0 | -0.005903071 | 0 | 0            | 0            | 0            | 0           |
| 0 | 0           | 0 | -0.016579641 | 0 | 0            | -0.087088809 | 0            | 0           |
| 0 | 0           | 0 | -0.013875035 | 0 | -0.05411985  | 0            | 0            | 0           |
| 0 | 0           | 0 | -0.057100526 | 0 | 0            | 0            | 0            | 0           |
| 0 | 0           | 0 | -0.018695137 | 0 | 0.005908547  | 0            | -0.081878045 | 0           |
| 0 | 0           | 0 | -0.057070942 | 0 | 0            | 0            | 0            | 0.049497394 |

|   |              |   |              |              |   |              |              |
|---|--------------|---|--------------|--------------|---|--------------|--------------|
| 0 | 0            | 0 | 0            | -0.065814132 | 0 | 0            | 0            |
| 0 | 0            | 0 | 0            | -0.013230836 | 0 | -0.088204411 | 0            |
| 0 | 0            | 0 | 0            | 0            | 0 | 0            | 0.074673597  |
| 0 | 0            | 0 | 0            | 0            | 0 | 0            | 0            |
| 0 | 0.04072743   | 0 | 0.021135029  | 0            | 0 | 0            | 0            |
| 0 | 0.029136365  | 0 | 0            | -0.015170525 | 0 | 0            | 0            |
| 0 | 0.035346287  | 0 | 0            | 0            | 0 | 0            | 0            |
| 0 | 0.053399503  | 0 | 0            | 0            | 0 | 0            | 0            |
| 0 | 0            | 0 | 0.030145664  | -0.042265497 | 0 | 0            | 0            |
| 0 | 0.02285822   | 0 | -0.056836012 | 0            | 0 | 0            | 0            |
| 0 | 0            | 0 | -0.051787643 | 0            | 0 | 0            | 0            |
| 0 | 0            | 0 | 0            | -0.025657803 | 0 | 0            | 0            |
| 0 | -0.045727712 | 0 | 0            | -0.076120578 | 0 | 0            | 0            |
| 0 | -0.046122946 | 0 | 0            | -0.076096243 | 0 | 0            | 0.10841798   |
| 0 | 0            | 0 | 0            | 0            | 0 | 0            | 0.076507802  |
| 0 | 0            | 0 | 0            | 0            | 0 | 0            | 0            |
| 0 | 0            | 0 | 0            | -0.053308721 | 0 | 0            | 0            |
| 0 | 0            | 0 | 0            | -0.053219756 | 0 | 0            | 0.075412684  |
| 0 | 0            | 0 | -0.000871461 | 0            | 0 | 0            | 0            |
| 0 | 0            | 0 | 0            | 0            | 0 | 0            | 0            |
| 0 | 0.05026086   | 0 | 0            | 0            | 0 | 0            | 0            |
| 0 | 0            | 0 | -0.004921439 | -0.069450799 | 0 | 0            | 0            |
| 0 | 0            | 0 | 0            | -0.07368717  | 0 | 0            | -0.005001078 |
| 0 | 0            | 0 | -0.004916558 | -0.069430892 | 0 | 0            | 0.066217835  |
| 0 | 0            | 0 | -0.040031345 | 0            | 0 | 0            | 0            |
| 0 | 0            | 0 | -0.039956965 | 0            | 0 | 0            | 0.072145914  |
| 0 | -0.043647438 | 0 | -0.067491238 | 0            | 0 | 0            | 0            |
| 0 | -0.04394891  | 0 | -0.067455241 | 0            | 0 | 0            | 0.095055741  |
| 0 | 0            | 0 | 0            | 0            | 0 | 0            | 0.060085017  |
| 0 | 0            | 0 | 0            | 0            | 0 | 0            | 0            |
| 0 | 0.041931362  | 0 | 0            | 0            | 0 | 0            | 0            |
| 0 | 0.018350022  | 0 | 0            | -0.055899299 | 0 | 0            | 0            |
| 0 | -0.009049646 | 0 | 0            | 0            | 0 | 0            | 0            |
| 0 | -0.009447639 | 0 | 0            | 0            | 0 | 0            | 0.095136128  |
| 0 | 0            | 0 | 0            | 0            | 0 | 0            | 0.036794195  |
| 0 | 0.01859377   | 0 | 0            | 0            | 0 | 0            | 0            |
| 0 | 0.018466363  | 0 | 0            | 0            | 0 | 0            | 0.042595308  |
| 0 | 0            | 0 | -0.020178433 | -0.044155553 | 0 | 0            | 0            |
| 0 | 0            | 0 | 0            | 0            | 0 | 0            | 0.032122085  |
| 0 | 0            | 0 | -0.065268809 | 0            | 0 | 0            | -0.014636955 |
| 0 | 0.006046984  | 0 | -0.017775187 | -0.058995417 | 0 | 0            | 0            |
| 0 | 0.019719262  | 0 | -0.045450025 | 0            | 0 | 0            | 0            |
| 0 | 0.0112585    | 0 | 0            | 0            | 0 | 0            | 0            |
| 0 | 0.011084732  | 0 | 0            | 0            | 0 | 0            | 0.05075143   |
| 0 | 0            | 0 | 0            | 0            | 0 | 0            | 0.030103788  |
| 0 | 0.04599232   | 0 | 0            | 0            | 0 | 0            | 0            |
| 0 | 0            | 0 | 0            | 0            | 0 | 0            | 0            |

|   |              |   |              |   |              |   |              |   |             |
|---|--------------|---|--------------|---|--------------|---|--------------|---|-------------|
| 0 | 0.04599491   | 0 | 0            | 0 | 0            | 0 | -0.080812924 | 0 | 0           |
| 0 | 0            | 0 | 0            | 0 | 0            | 0 | 0            | 0 | 0.055350694 |
| 0 | 0            | 0 | 0            | 0 | 0            | 0 | -0.078854184 | 0 | 0.058574299 |
| 0 | 0            | 0 | 0            | 0 | 0            | 0 | -0.078745081 | 0 | 0           |
| 0 | 0            | 0 | 0            | 0 | -0.069686968 | 0 | 0            | 0 | 0           |
| 0 | 0            | 0 | 0            | 0 | -0.06965414  | 0 | 0            | 0 | 0.058043392 |
| 0 | 0.046733672  | 0 | 0            | 0 | 0            | 0 | 0            | 0 | 0           |
| 0 | 0.046152175  | 0 | 0            | 0 | 0            | 0 | -0.046403606 | 0 | 0           |
| 0 | 0            | 0 | 0            | 0 | 0            | 0 | 0            | 0 | 0           |
| 0 | 0            | 0 | 0            | 0 | 0            | 0 | 0            | 0 | 0.058142611 |
| 0 | 0            | 0 | 0            | 0 | 0            | 0 | -0.04618445  | 0 | 0.057956398 |
| 0 | 0            | 0 | 0            | 0 | 0            | 0 | -0.045900067 | 0 | 0           |
| 0 | 0.045872546  | 0 | 0            | 0 | 0            | 0 | 0            | 0 | 0           |
| 0 | 0            | 0 | 0            | 0 | 0            | 0 | -0.05183669  | 0 | 0           |
| 0 | 0            | 0 | 0            | 0 | -0.039656667 | 0 | 0            | 0 | 0           |
| 0 | 0            | 0 | 0            | 0 | -0.039621051 | 0 | 0            | 0 | 0.057657989 |
| 0 | 0            | 0 | 0            | 0 | -0.033812963 | 0 | -0.042983968 | 0 | 0.057982346 |
| 0 | 0.045351531  | 0 | 0            | 0 | 0            | 0 | -0.034445533 | 0 | 0           |
| 0 | 0            | 0 | 0            | 0 | -0.03415659  | 0 | -0.042566261 | 0 | 0           |
| 0 | 0            | 0 | 0            | 0 | -0.035131449 | 0 | -0.04764444  | 0 | 0           |
| 0 | 0            | 0 | 0            | 0 | 0            | 0 | 0            | 0 | 0           |
| 0 | 0            | 0 | 0            | 0 | 0            | 0 | -0.035907823 | 0 | 0           |
| 0 | 0            | 0 | 0            | 0 | 0            | 0 | 0            | 0 | 0           |
| 0 | 0            | 0 | 0            | 0 | 0            | 0 | 0            | 0 | 0.056130075 |
| 0 | -0.032663487 | 0 | 0            | 0 | 0            | 0 | 0            | 0 | 0.049650939 |
| 0 | 0            | 0 | -0.025533492 | 0 | 0            | 0 | -0.059757854 | 0 | 0           |
| 0 | 0.030567882  | 0 | 0            | 0 | 0            | 0 | 0            | 0 | 0           |
| 0 | 0.030711776  | 0 | 0            | 0 | 0            | 0 | 0            | 0 | 0.026526959 |
| 0 | 0            | 0 | -0.01867985  | 0 | 0            | 0 | 0            | 0 | 0           |
| 0 | 0            | 0 | 0            | 0 | -0.043507526 | 0 | 0            | 0 | 0           |
| 0 | 0            | 0 | 0            | 0 | 0            | 0 | -0.037134783 | 0 | 0.056656825 |
| 0 | 0            | 0 | 0            | 0 | 0            | 0 | -0.036421093 | 0 | 0           |
| 0 | 0            | 0 | 0            | 0 | 0            | 0 | 0            | 0 | 0           |
| 0 | 0            | 0 | 0            | 0 | -0.024213721 | 0 | 0            | 0 | 0           |
| 0 | 0.029886335  | 0 | 0            | 0 | -0.067318601 | 0 | 0            | 0 | 0           |
| 0 | 0            | 0 | -0.020070954 | 0 | 0            | 0 | -0.058181746 | 0 | 0.054569404 |
| 0 | 0.043657525  | 0 | 0            | 0 | 0            | 0 | 0            | 0 | 0           |
| 0 | 0            | 0 | 0            | 0 | -0.028462559 | 0 | 0            | 0 | 0           |
| 0 | 0            | 0 | 0            | 0 | -0.028456707 | 0 | 0            | 0 | 0.056247574 |
| 0 | 0            | 0 | -0.020306957 | 0 | 0            | 0 | -0.057900359 | 0 | 0           |
| 0 | 0.027375975  | 0 | 0            | 0 | 0            | 0 | -0.074499466 | 0 | 0.032722228 |
| 0 | 0.043949271  | 0 | -0.003853652 | 0 | 0            | 0 | 0            | 0 | 0           |
| 0 | 0.027833068  | 0 | 0            | 0 | 0            | 0 | -0.074458376 | 0 | 0           |
| 0 | 0.045913296  | 0 | 0            | 0 | 0.003360932  | 0 | 0            | 0 | 0           |
| 0 | 0.040673549  | 0 | 0            | 0 | -0.019982486 | 0 | -0.057148049 | 0 | 0           |
| 0 | 0            | 0 | -0.014525124 | 0 | 0            | 0 | 0            | 0 | 0           |
| 0 | 0            | 0 | -0.014502427 | 0 | 0            | 0 | 0            | 0 | 0.053134731 |

|   |              |   |              |   |              |   |              |   |             |
|---|--------------|---|--------------|---|--------------|---|--------------|---|-------------|
| 0 | 0.039335097  | 0 | 0            | 0 | -0.028768341 | 0 | 0            | 0 | 0           |
| 0 | 0.041026407  | 0 | -0.01340931  | 0 | 0            | 0 | -0.064945932 | 0 | 0           |
| 0 | 0            | 0 | 0            | 0 | 0            | 0 | -0.048937    | 0 | 0.059258038 |
| 0 | 0            | 0 | 0            | 0 | 0            | 0 | 0            | 0 | 0           |
| 0 | 0            | 0 | 0            | 0 | 0            | 0 | -0.048645067 | 0 | 0           |
| 0 | 0            | 0 | 0            | 0 | 0            | 0 | 0            | 0 | 0.05364827  |
| 0 | 0            | 0 | 0            | 0 | 0            | 0 | 0            | 0 | 0.010635125 |
| 0 | 0.045544618  | 0 | 0            | 0 | 0            | 0 | -0.073871157 | 0 | 0           |
| 0 | 0            | 0 | 0            | 0 | 0            | 0 | -0.070786923 | 0 | 0.059486849 |
| 0 | 0            | 0 | 0            | 0 | 0            | 0 | -0.073505727 | 0 | 0.084237729 |
| 0 | 0            | 0 | 0            | 0 | 0            | 0 | -0.070651946 | 0 | 0           |
| 0 | 0.043178461  | 0 | 0            | 0 | 0            | 0 | -0.049023883 | 0 | 0           |
| 0 | 0            | 0 | 0            | 0 | 0            | 0 | -0.08374543  | 0 | 0           |
| 0 | 0.029485535  | 0 | 0            | 0 | 0            | 0 | 0            | 0 | 0           |
| 0 | 0.029549453  | 0 | 0            | 0 | 0            | 0 | 0            | 0 | 0.030251    |
| 0 | 0            | 0 | 0            | 0 | -0.060276275 | 0 | 0            | 0 | 0           |
| 0 | 0            | 0 | 0            | 0 | -0.060202778 | 0 | 0            | 0 | 0.060513591 |
| 0 | -0.003463149 | 0 | 0            | 0 | -0.065991593 | 0 | 0            | 0 | 0           |
| 0 | 0            | 0 | 0            | 0 | -0.065681571 | 0 | 0            | 0 | 0.014149405 |
| 0 | 0            | 0 | 3.69E-06     | 0 | -0.065693091 | 0 | 0            | 0 | 0           |
| 0 | -0.003625775 | 0 | 0            | 0 | -0.065972267 | 0 | 0            | 0 | 0.061274283 |
| 0 | 0            | 0 | 4.35E-05     | 0 | -0.065695774 | 0 | 0            | 0 | 0.057895027 |
| 0 | 0.047985214  | 0 | 0            | 0 | 0            | 0 | 0            | 0 | 0           |
| 0 | 0            | 0 | 0            | 0 | 0            | 0 | 0            | 0 | 0           |
| 0 | 0            | 0 | 0            | 0 | 0            | 0 | 0            | 0 | 0.057353464 |
| 0 | 0.042846411  | 0 | 0            | 0 | 0            | 0 | 0            | 0 | 0           |
| 0 | 0            | 0 | 0            | 0 | 0            | 0 | -0.040102554 | 0 | 0.057973337 |
| 0 | 0            | 0 | 0            | 0 | 0            | 0 | -0.039373186 | 0 | 0           |
| 0 | 0.047129767  | 0 | 0.003407107  | 0 | 0            | 0 | 0            | 0 | 0           |
| 0 | 0            | 0 | 0            | 0 | 0            | 0 | 0            | 0 | 0           |
| 0 | 0            | 0 | 0            | 0 | 0            | 0 | 0            | 0 | 0.061697985 |
| 0 | 0            | 0 | 0            | 0 | -0.026959457 | 0 | -0.052715724 | 0 | 0.059449666 |
| 0 | 0            | 0 | -0.009995279 | 0 | -0.061567806 | 0 | 0            | 0 | 0           |
| 0 | 0            | 0 | 0            | 0 | -0.027309104 | 0 | -0.05228765  | 0 | 0           |
| 0 | 0            | 0 | -0.011625236 | 0 | 0            | 0 | 0            | 0 | 0           |
| 0 | 0            | 0 | -0.01156576  | 0 | 0            | 0 | 0            | 0 | 0.055870007 |
| 0 | 0            | 0 | 0            | 0 | -0.070084814 | 0 | 0            | 0 | 0           |
| 0 | 0.042274629  | 0 | 0            | 0 | 0            | 0 | -0.037354522 | 0 | 0           |
| 0 | 0            | 0 | 0.016369236  | 0 | 0            | 0 | -0.059832062 | 0 | 0.064633881 |
| 0 | 0            | 0 | 0            | 0 | -0.035315522 | 0 | 0            | 0 | 0           |
| 0 | 0            | 0 | 0            | 0 | -0.035278618 | 0 | 0            | 0 | 0.059034168 |
| 0 | 0            | 0 | 0.016179869  | 0 | 0            | 0 | -0.059489121 | 0 | 0           |
| 0 | 0            | 0 | 0            | 0 | 0            | 0 | 0            | 0 | 0.019322937 |
| 0 | 0.02306301   | 0 | 0            | 0 | 0            | 0 | 0            | 0 | 0           |
| 0 | 0.023165825  | 0 | 0            | 0 | 0            | 0 | 0            | 0 | 0.03488292  |
| 0 | 0            | 0 | 0            | 0 | 0            | 0 | -0.04596213  | 0 | 0.06139627  |
| 0 | 0            | 0 | -0.017044181 | 0 | 0            | 0 | -0.064031684 | 0 | 0.056494555 |



|   |             |   |              |   |              |   |              |   |             |
|---|-------------|---|--------------|---|--------------|---|--------------|---|-------------|
| 0 | 0           | 0 | 0            | 0 | 0            | 0 | -0.045179368 | 0 | 0           |
| 0 | 0           | 0 | -0.01728758  | 0 | 0            | 0 | -0.063739923 | 0 | 0           |
| 0 | 0           | 0 | 0            | 0 | 0            | 0 | -0.061413741 | 0 | 0.059820773 |
| 0 | 0.007580664 | 0 | 0            | 0 | 0            | 0 | -0.058251628 | 0 | 0.055216181 |
| 0 | 0           | 0 | 0            | 0 | 0            | 0 | -0.061112282 | 0 | 0           |
| 0 | 0.007953272 | 0 | 0            | 0 | 0            | 0 | -0.058009727 | 0 | 0           |
| 0 | 0           | 0 | 0            | 0 | 0.002308738  | 0 | -0.05889799  | 0 | 0.062063806 |
| 0 | 0           | 0 | 0            | 0 | 0            | 0 | -0.05763933  | 0 | 0.057700276 |
| 0 | 0           | 0 | 0            | 0 | 0.002045019  | 0 | -0.058452666 | 0 | 0           |
| 0 | 0.019910244 | 0 | 0            | 0 | 0            | 0 | -0.077803182 | 0 | 0.041091336 |
| 0 | 0           | 0 | -0.021470289 | 0 | 0            | 0 | 0            | 0 | 0           |
| 0 | 0.020421232 | 0 | 0            | 0 | 0            | 0 | -0.07774719  | 0 | 0           |
| 0 | 0           | 0 | 0            | 0 | -0.022547265 | 0 | -0.031991502 | 0 | 0           |
| 0 | 0           | 0 | 0            | 0 | 0            | 0 | -0.055272017 | 0 | 0           |
| 0 | 0           | 0 | -0.010832345 | 0 | 0            | 0 | 0            | 0 | 0           |
| 0 | 0           | 0 | 0            | 0 | -0.016122326 | 0 | 0            | 0 | 0           |
| 0 | 0           | 0 | -0.010813895 | 0 | 0            | 0 | 0            | 0 | 0.054936463 |
| 0 | 0           | 0 | 0            | 0 | -0.016114605 | 0 | 0            | 0 | 0.057123066 |
| 0 | 0           | 0 | 0            | 0 | 0            | 0 | 0            | 0 | 0           |
| 0 | 0           | 0 | 0            | 0 | 0            | 0 | 0            | 0 | 0.054643604 |
| 0 | 0           | 0 | 0            | 0 | 0            | 0 | 0            | 0 | 0.00723849  |
| 0 | 0.0457498   | 0 | 0            | 0 | 0.016012646  | 0 | 0            | 0 | 0           |
| 0 | 0.040206127 | 0 | 0            | 0 | 0            | 0 | 0            | 0 | 0           |
| 0 | 0           | 0 | 0            | 0 | 0            | 0 | 0            | 0 | 0           |
| 0 | 0           | 0 | 0            | 0 | 0            | 0 | -0.074764554 | 0 | 0.060671858 |
| 0 | 0           | 0 | 0            | 0 | 0            | 0 | -0.032404362 | 0 | 0           |
| 0 | 0           | 0 | 0            | 0 | 0            | 0 | -0.077105243 | 0 | 0.084408729 |
| 0 | 0           | 0 | 0            | 0 | 0            | 0 | -0.074624133 | 0 | 0           |
| 0 | 0           | 0 | -0.010557649 | 0 | 0            | 0 | -0.043971726 | 0 | 0           |
| 0 | 0.048742595 | 0 | 0.035311082  | 0 | 0            | 0 | -0.066528132 | 0 | 0           |
| 0 | 0.041708932 | 0 | -0.001038311 | 0 | 0            | 0 | 0            | 0 | 0           |
| 0 | 0           | 0 | 0            | 0 | 0            | 0 | 0            | 0 | 0           |
| 0 | 0           | 0 | -0.059491905 | 0 | 0            | 0 | 0            | 0 | 0           |
| 0 | 0           | 0 | -0.059462993 | 0 | 0            | 0 | 0            | 0 | 0.047876346 |
| 0 | 0           | 0 | 0            | 0 | 0            | 0 | -0.036919849 | 0 | 0           |
| 0 | 0           | 0 | 0            | 0 | -0.023382951 | 0 | 0            | 0 | 0           |
| 0 | 0           | 0 | 0            | 0 | -0.038652251 | 0 | -0.050227539 | 0 | 0           |
| 0 | 0           | 0 | -0.018925685 | 0 | 0            | 0 | -0.031452995 | 0 | 0           |
| 0 | 0           | 0 | 0            | 0 | -0.04491315  | 0 | 0            | 0 | 0           |
| 0 | 0.038637948 | 0 | -0.011198941 | 0 | 0            | 0 | -0.070090715 | 0 | 0           |
| 0 | 0.03903163  | 0 | 0            | 0 | -0.01342628  | 0 | -0.066551843 | 0 | 0           |
| 0 | 0           | 0 | 0.016859262  | 0 | 0            | 0 | 0            | 0 | 0           |
| 0 | 0           | 0 | 0.016937564  | 0 | 0            | 0 | 0            | 0 | 0.062661789 |
| 0 | 0           | 0 | -0.019835385 | 0 | 0            | 0 | 0            | 0 | 0           |
| 0 | 0           | 0 | 0            | 0 | 0            | 0 | -0.048748966 | 0 | 0.057621981 |
| 0 | 0           | 0 | 0.013559905  | 0 | -0.047569462 | 0 | 0            | 0 | 0           |
| 0 | 0           | 0 | 0            | 0 | 0            | 0 | -0.048031492 | 0 | 0           |

|   |              |   |              |   |              |   |              |   |              |
|---|--------------|---|--------------|---|--------------|---|--------------|---|--------------|
| 0 | 0            | 0 | 0            | 0 | -0.0238219   | 0 | -0.031949374 | 0 | 0            |
| 0 | 0            | 0 | -0.013502712 | 0 | -0.022514089 | 0 | -0.043303682 | 0 | 0            |
| 0 | 0            | 0 | 0            | 0 | 0.009637595  | 0 | -0.047335579 | 0 | 0.06017278   |
| 0 | 0            | 0 | -0.010503427 | 0 | 0            | 0 | 0            | 0 | 0            |
| 0 | 0            | 0 | 0            | 0 | 0.009594039  | 0 | -0.046575086 | 0 | 0            |
| 0 | 0.007106079  | 0 | 0            | 0 | 0            | 0 | -0.047690477 | 0 | 0.054262067  |
| 0 | 0.007410233  | 0 | 0            | 0 | 0            | 0 | -0.047016042 | 0 | 0            |
| 0 | 0.042179931  | 0 | 0            | 0 | 0            | 0 | -0.078507859 | 0 | 0            |
| 0 | 0            | 0 | -0.027528974 | 0 | 0            | 0 | -0.061338074 | 0 | 0            |
| 0 | 0            | 0 | 0            | 0 | 0            | 0 | -0.047308119 | 0 | 0.04430746   |
| 0 | 0            | 0 | 4.66E-05     | 0 | 0            | 0 | -0.047515983 | 0 | 0.060773766  |
| 0 | 0            | 0 | -4.02E-05    | 0 | 0            | 0 | -0.046742437 | 0 | 0            |
| 0 | 0            | 0 | 0            | 0 | -0.025222746 | 0 | 0            | 0 | 0            |
| 0 | 0            | 0 | 0            | 0 | 0.011385134  | 0 | 0            | 0 | 0            |
| 0 | 0            | 0 | 0            | 0 | 0            | 0 | 0            | 0 | 0            |
| 0 | 0.033368306  | 0 | 0            | 0 | -0.057084859 | 0 | 0            | 0 | 0            |
| 0 | 0            | 0 | 0            | 0 | 0.011461572  | 0 | 0            | 0 | 0.059494705  |
| 0 | 0            | 0 | 0            | 0 | 0            | 0 | 0            | 0 | 0.057148534  |
| 0 | 0.007643839  | 0 | 0            | 0 | 0            | 0 | 0            | 0 | 0            |
| 0 | 0.007633565  | 0 | 0            | 0 | 0            | 0 | 0            | 0 | 0.053201234  |
| 0 | 0.037196958  | 0 | 0            | 0 | -0.02473129  | 0 | 0            | 0 | 0            |
| 0 | 0            | 0 | 0            | 0 | 0            | 0 | 0            | 0 | -0.000223994 |
| 0 | 0.029475187  | 0 | -0.005166075 | 0 | -0.058951312 | 0 | 0            | 0 | 0            |
| 0 | 0.04264883   | 0 | 0            | 0 | 0.023620192  | 0 | -0.074032348 | 0 | 0            |
| 0 | 0.022355883  | 0 | 0            | 0 | 0            | 0 | 0            | 0 | 0            |
| 0 | 0.048123079  | 0 | 0            | 0 | 0.046208635  | 0 | 0            | 0 | 0            |
| 0 | 0.022378414  | 0 | 0            | 0 | 0            | 0 | 0            | 0 | 0.038258493  |
| 0 | 0.047384574  | 0 | 0            | 0 | 0.043878175  | 0 | -0.047170122 | 0 | 0            |
| 0 | 0            | 0 | -0.015954861 | 0 | -0.010334569 | 0 | 0            | 0 | 0            |
| 0 | 0            | 0 | 0            | 0 | 0            | 0 | 0            | 0 | 0            |
| 0 | 0            | 0 | 0            | 0 | 0            | 0 | 0            | 0 | 0.062998218  |
| 0 | 0.048110036  | 0 | 0.036359704  | 0 | 0            | 0 | 0            | 0 | 0            |
| 0 | 0.033582711  | 0 | 0            | 0 | 0            | 0 | -0.067342398 | 0 | 0            |
| 0 | 0.035790197  | 0 | 0            | 0 | 0            | 0 | -0.045414204 | 0 | 0            |
| 0 | 0            | 0 | -0.00672633  | 0 | 0            | 0 | 0            | 0 | 0            |
| 0 | 0            | 0 | -0.006666214 | 0 | 0            | 0 | 0            | 0 | 0.058010632  |
| 0 | 0            | 0 | 0            | 0 | 0            | 0 | 0            | 0 | 0.016632287  |
| 0 | 0            | 0 | -0.043023535 | 0 | 0            | 0 | 0            | 0 | 0            |
| 0 | 0            | 0 | 0            | 0 | 0            | 0 | -0.058466647 | 0 | 0            |
| 0 | 0            | 0 | -0.042953292 | 0 | 0            | 0 | 0            | 0 | 0.05835781   |
| 0 | 0.044845784  | 0 | 0            | 0 | 0            | 0 | 0            | 0 | 0            |
| 0 | 0.026069191  | 0 | -0.058756164 | 0 | 0            | 0 | 0            | 0 | 0            |
| 0 | 0.04552603   | 0 | 0.007413697  | 0 | 0            | 0 | 0            | 0 | 0            |
| 0 | 0.021249294  | 0 | 0            | 0 | 0.025017964  | 0 | 0            | 0 | 0            |
| 0 | 0.0215021    | 0 | 0            | 0 | 0.025256695  | 0 | 0            | 0 | 0.038249034  |
| 0 | 0            | 0 | -0.005486081 | 0 | -0.006477109 | 0 | -0.079352405 | 0 | 0.062059745  |
| 0 | -0.002345873 | 0 | 0            | 0 | -0.012183174 | 0 | -0.078255735 | 0 | 0.065222224  |

|   |              |   |              |   |              |   |              |   |              |
|---|--------------|---|--------------|---|--------------|---|--------------|---|--------------|
| 0 | 0            | 0 | -0.009236012 | 0 | 0            | 0 | -0.08094134  | 0 | 0.061720381  |
| 0 | 0            | 0 | -0.009393574 | 0 | 0            | 0 | -0.0818664   | 0 | 0.076979361  |
| 0 | 0            | 0 | 0            | 0 | -0.058179211 | 0 | 0            | 0 | 0            |
| 0 | 0            | 0 | 0            | 0 | -0.011151216 | 0 | -0.079402835 | 0 | 0.076165087  |
| 0 | 0            | 0 | 0            | 0 | -0.011036283 | 0 | -0.07892819  | 0 | 0.063287056  |
| 0 | -0.000359603 | 0 | -0.009538942 | 0 | 0            | 0 | -0.081690214 | 0 | 0.061583676  |
| 0 | 0            | 0 | 0            | 0 | -0.058103845 | 0 | 0            | 0 | 0.063001305  |
| 0 | 0            | 0 | -0.005612922 | 0 | -0.006680346 | 0 | -0.078995532 | 0 | 0            |
| 0 | 0            | 0 | 0.047824202  | 0 | -0.053457611 | 0 | 0            | 0 | 0            |
| 0 | -0.001880045 | 0 | 0            | 0 | -0.012318553 | 0 | -0.078094062 | 0 | 0            |
| 0 | 0            | 0 | -0.00948631  | 0 | 0            | 0 | -0.080659647 | 0 | 0            |
| 0 | 0            | 0 | 0            | 0 | -0.01135826  | 0 | -0.078563752 | 0 | 0            |
| 0 | 0.000114728  | 0 | -0.009665029 | 0 | 0            | 0 | -0.081557591 | 0 | 0            |
| 0 | 0            | 0 | 0.047912855  | 0 | -0.05344395  | 0 | 0            | 0 | 0.071660651  |
| 0 | 0            | 0 | -0.010942073 | 0 | 0.020169607  | 0 | 0            | 0 | 0            |
| 0 | -0.011933246 | 0 | 0            | 0 | -0.066693173 | 0 | 0            | 0 | 0            |
| 0 | -0.012144924 | 0 | 0            | 0 | -0.066671865 | 0 | 0            | 0 | 0.07070332   |
| 0 | 0            | 0 | -0.010939952 | 0 | 0.020242403  | 0 | 0            | 0 | 0.056802281  |
| 0 | 0            | 0 | 0            | 0 | -0.014082157 | 0 | -0.03996222  | 0 | 0            |
| 0 | 0.004329425  | 0 | 0            | 0 | 0            | 0 | -0.086444619 | 0 | 0.059870093  |
| 0 | 0            | 0 | 0            | 0 | 0            | 0 | -0.035194407 | 0 | 0            |
| 0 | 0.004158655  | 0 | 0            | 0 | 0            | 0 | -0.088811806 | 0 | 0.082199321  |
| 0 | 0            | 0 | 0            | 0 | 0.010262763  | 0 | 0            | 0 | 0            |
| 0 | 0            | 0 | 0            | 0 | 0            | 0 | -0.086079014 | 0 | 0.085457337  |
| 0 | 0            | 0 | 0            | 0 | 0            | 0 | 0            | 0 | 0            |
| 0 | 0            | 0 | 0            | 0 | 0.010336589  | 0 | 0            | 0 | 0.05659799   |
| 0 | 0.004893394  | 0 | 0            | 0 | 0            | 0 | -0.086373119 | 0 | 0            |
| 0 | 0.006347332  | 0 | 0            | 0 | 0            | 0 | 0            | 0 | 0            |
| 0 | 0            | 0 | 0            | 0 | 0.01014069   | 0 | 0            | 0 | -0.001781812 |
| 0 | 0.006367585  | 0 | 0            | 0 | 0            | 0 | 0            | 0 | 0.051451453  |
| 0 | 0            | 0 | -0.001584815 | 0 | -0.06423104  | 0 | 0            | 0 | 0            |
| 0 | 0            | 0 | 0            | 0 | -0.065582326 | 0 | 0            | 0 | 0.011790694  |
| 0 | 0            | 0 | -0.00112717  | 0 | 0            | 0 | 0            | 0 | 0            |
| 0 | 0            | 0 | 0            | 0 | 0            | 0 | 0            | 0 | -0.005964117 |
| 0 | 0            | 0 | -0.00155024  | 0 | -0.064226877 | 0 | 0            | 0 | 0.059096743  |
| 0 | 0.007133844  | 0 | 0.001343292  | 0 | 0            | 0 | 0            | 0 | 0            |
| 0 | 0.006513821  | 0 | 0            | 0 | 0            | 0 | 0            | 0 | -0.009755668 |
| 0 | 0.031998365  | 0 | 0            | 0 | 0            | 0 | -0.049179598 | 0 | 0            |
| 0 | 0            | 0 | -0.001089538 | 0 | 0            | 0 | 0            | 0 | 0.057116373  |
| 0 | 0.007152382  | 0 | 0.00138098   | 0 | 0            | 0 | 0            | 0 | 0.053125271  |
| 0 | 0            | 0 | -0.001015192 | 0 | 0            | 0 | 0            | 0 | -0.002940687 |
| 0 | 0            | 0 | -0.004929871 | 0 | 0            | 0 | -0.04782635  | 0 | 0            |
| 0 | 0.044712983  | 0 | -0.015182682 | 0 | 0.056380407  | 0 | 0            | 0 | 0            |
| 0 | 0            | 0 | -0.05324512  | 0 | 0            | 0 | 0            | 0 | 0            |
| 0 | 0            | 0 | 0            | 0 | 0            | 0 | -0.039955109 | 0 | 0            |
| 0 | 0.032083475  | 0 | 0            | 0 | 0            | 0 | 0            | 0 | 0            |
| 0 | 0.044074624  | 0 | 0            | 0 | 0.042203297  | 0 | 0            | 0 | 0            |

|   |              |   |              |   |              |   |              |   |             |
|---|--------------|---|--------------|---|--------------|---|--------------|---|-------------|
| 0 | 0.038418001  | 0 | 0.010306505  | 0 | 0            | 0 | -0.047758082 | 0 | 0           |
| 0 | 0            | 0 | -0.015246699 | 0 | 0            | 0 | -0.034738797 | 0 | 0           |
| 0 | 0            | 0 | -0.011826897 | 0 | -0.057245156 | 0 | 0            | 0 | 0           |
| 0 | 0            | 0 | 0            | 0 | -0.010982215 | 0 | 0            | 0 | 0           |
| 0 | 0            | 0 | -0.004900136 | 0 | 0            | 0 | 0            | 0 | 0           |
| 0 | 0            | 0 | -0.016323346 | 0 | 0            | 0 | 0            | 0 | 0           |
| 0 | 0            | 0 | -0.020790594 | 0 | 0            | 0 | 0            | 0 | 0           |
| 0 | 0            | 0 | 0            | 0 | -0.011122201 | 0 | -0.035711529 | 0 | 0           |
| 0 | 0            | 0 | 0            | 0 | 0            | 0 | -0.046742582 | 0 | 0           |
| 0 | 0            | 0 | 0            | 0 | -0.031602297 | 0 | -0.059702735 | 0 | 0           |
| 0 | 0            | 0 | -0.024757437 | 0 | 0            | 0 | -0.067238208 | 0 | 0           |
| 0 | 0.036205179  | 0 | -0.041396473 | 0 | 0            | 0 | 0            | 0 | 0           |
| 0 | 0            | 0 | -0.05690669  | 0 | 0            | 0 | 0            | 0 | 0.006436373 |
| 0 | 3.69E-05     | 0 | -0.056909866 | 0 | 0            | 0 | 0            | 0 | 0           |
| 0 | -3.09E-05    | 0 | -0.056886807 | 0 | 0            | 0 | 0            | 0 | 0.048193047 |
| 0 | 0            | 0 | -0.015425538 | 0 | -0.013931895 | 0 | -0.053068039 | 0 | 0           |
| 0 | 0            | 0 | 0            | 0 | -0.012834724 | 0 | 0            | 0 | 0           |
| 0 | 0            | 0 | 0            | 0 | -0.039939616 | 0 | 0            | 0 | 0           |
| 0 | 0            | 0 | 0.016533763  | 0 | -0.044822508 | 0 | 0            | 0 | 0           |
| 0 | 0            | 0 | 0            | 0 | 0            | 0 | 0            | 0 | 0.076086742 |
| 0 | 0            | 0 | 0            | 0 | 0            | 0 | 0            | 0 | 0           |
| 0 | 0            | 0 | -0.018697178 | 0 | 0.00465883   | 0 | 0            | 0 | 0           |
| 0 | -0.013192623 | 0 | 0            | 0 | -0.02953933  | 0 | 0            | 0 | 0           |
| 0 | 0            | 0 | 0            | 0 | -0.021923903 | 0 | 0            | 0 | 0           |
| 0 | -0.013383735 | 0 | 0            | 0 | -0.029533348 | 0 | 0            | 0 | 0.076001933 |
| 0 | 0            | 0 | 0.008496977  | 0 | 0            | 0 | -0.070033111 | 0 | 0           |
| 0 | 0            | 0 | 0            | 0 | -0.021839577 | 0 | 0            | 0 | 0.066438245 |
| 0 | 0            | 0 | 0            | 0 | 0.000270883  | 0 | -0.06889303  | 0 | 0           |
| 0 | 0.034272839  | 0 | 0.007879553  | 0 | 0            | 0 | 0            | 0 | 0           |
| 0 | 0            | 0 | 0            | 0 | -0.025185664 | 0 | 0            | 0 | 0.001601023 |
| 0 | 0            | 0 | 0            | 0 | 0.015374066  | 0 | -0.042765028 | 0 | 0           |
| 0 | 0            | 0 | 0.009372853  | 0 | 0            | 0 | -0.043218975 | 0 | 0           |
| 0 | 0.054843421  | 0 | 0            | 0 | 0            | 0 | 0            | 0 | 0           |
| 0 | 0            | 0 | 0            | 0 | 0.013946701  | 0 | -0.047829531 | 0 | 0           |
| 0 | 0.034014445  | 0 | -0.011579791 | 0 | 0.013237985  | 0 | -0.096063634 | 0 | 0           |
| 0 | 0            | 0 | 0            | 0 | 0.015770967  | 0 | 0            | 0 | 0           |
| 0 | 0            | 0 | 0.00875272   | 0 | 0            | 0 | 0            | 0 | 0           |
| 0 | 0            | 0 | 0.008855863  | 0 | 0            | 0 | 0            | 0 | 0.069696657 |
| 0 | 0            | 0 | -0.004969389 | 0 | 0            | 0 | -0.047786001 | 0 | 0           |
| 0 | 0.032085458  | 0 | -0.004700291 | 0 | 0            | 0 | -0.092494167 | 0 | 0           |
| 0 | 0            | 0 | 0.010578966  | 0 | 0            | 0 | 0            | 0 | 0           |
| 0 | 0            | 0 | 0.009899564  | 0 | -0.003171041 | 0 | -0.058359148 | 0 | 0           |
| 0 | 0.034924575  | 0 | 0            | 0 | 0.003261375  | 0 | -0.097217148 | 0 | 0           |
| 0 | 0.002956656  | 0 | 0            | 0 | 0            | 0 | 0            | 0 | 0           |
| 0 | 0            | 0 | 0            | 0 | 0            | 0 | 0            | 0 | 0.012768064 |
| 0 | 0.002813937  | 0 | 0            | 0 | 0            | 0 | 0            | 0 | 0.065646449 |
| 0 | 0            | 0 | -0.021501013 | 0 | 0.033568558  | 0 | -0.042926824 | 0 | 0           |

|   |              |   |              |   |              |   |              |              |
|---|--------------|---|--------------|---|--------------|---|--------------|--------------|
| 0 | 0            | 0 | -0.0421923   | 0 | 0            | 0 | 0            | 0            |
| 0 | 0            | 0 | -0.042121891 | 0 | 0            | 0 | 0            | 0.060560437  |
| 0 | 0.00716106   | 0 | 0.010570041  | 0 | 0            | 0 | 0            | 0            |
| 0 | 0.007097693  | 0 | 0.010613998  | 0 | 0            | 0 | 0            | 0.058596964  |
| 0 | 0.030481666  | 0 | 0            | 0 | -0.056014244 | 0 | 0            | 0            |
| 0 | 0            | 0 | 0.007476111  | 0 | 0            | 0 | 0            | 0.008705562  |
| 0 | 0.001643954  | 0 | 0            | 0 | 0            | 0 | 0            | 0.004306678  |
| 0 | 0.025656808  | 0 | -0.008045626 | 0 | -0.056575216 | 0 | 0            | 0            |
| 0 | 0.040750169  | 0 | 0.052368763  | 0 | -0.04231658  | 0 | 0            | 0            |
| 0 | 0            | 0 | -0.002211902 | 0 | 0.017802515  | 0 | 0            | 0            |
| 0 | 0            | 0 | -0.022749481 | 0 | 0.034982211  | 0 | 0            | 0            |
| 0 | 0            | 0 | -0.016109444 | 0 | 0            | 0 | 0            | 0            |
| 0 | 0.026624475  | 0 | 0            | 0 | 0            | 0 | 0            | 0            |
| 0 | 0.026449798  | 0 | 0            | 0 | 0            | 0 | 0            | 0.050228357  |
| 0 | 0            | 0 | -0.018011529 | 0 | 0.00244336   | 0 | -0.087837222 | 0            |
| 0 | 0            | 0 | -0.013948589 | 0 | -0.053479476 | 0 | 0            | 0            |
| 0 | -0.007982659 | 0 | -0.057812657 | 0 | 0            | 0 | 0            | 0            |
| 0 | -0.008096176 | 0 | -0.057785467 | 0 | 0            | 0 | 0            | 0.056923597  |
| 0 | 0            | 0 | -0.057096277 | 0 | 0            | 0 | 0            | 0.004174294  |
| 0 | 0.044262604  | 0 | 0.023591164  | 0 | 0            | 0 | 0            | 0            |
| 0 | 0            | 0 | 0            | 0 | 0            | 0 | 0            | 0.046294686  |
| 0 | 0.032900613  | 0 | -0.041838428 | 0 | 0            | 0 | 0            | 0            |
| 0 | 0.031360403  | 0 | 0            | 0 | -0.011900039 | 0 | 0            | 0            |
| 0 | 0            | 0 | 0.033774529  | 0 | -0.047653827 | 0 | 0            | 0            |
| 0 | -0.035948044 | 0 | 0            | 0 | -0.061803979 | 0 | 0            | 0            |
| 0 | -0.036316664 | 0 | 0            | 0 | -0.061742753 | 0 | 0            | 0.10525083   |
| 0 | -0.045824022 | 0 | -0.005817963 | 0 | -0.071120498 | 0 | 0            | 0            |
| 0 | -0.046049365 | 0 | 0            | 0 | -0.076116533 | 0 | 0            | 0.043655788  |
| 0 | -0.046209958 | 0 | -0.005736254 | 0 | -0.071166462 | 0 | 0            | 0.10744361   |
| 0 | 0.018906361  | 0 | 0            | 0 | 0            | 0 | 0            | 0            |
| 0 | 0.018676356  | 0 | 0            | 0 | 0            | 0 | 0            | 0.059271936  |
| 0 | 0            | 0 | 0            | 0 | 0            | 0 | 0            | 0.044528365  |
| 0 | 0            | 0 | -0.004965667 | 0 | -0.049032794 | 0 | 0            | 0            |
| 0 | 0            | 0 | 0            | 0 | -0.05328798  | 0 | 0            | 0.010975497  |
| 0 | 0            | 0 | -0.004935231 | 0 | -0.048972876 | 0 | 0            | 0.074508108  |
| 0 | -0.026557271 | 0 | -0.044718079 | 0 | 0            | 0 | 0            | 0            |
| 0 | -0.02686454  | 0 | -0.044650051 | 0 | 0            | 0 | 0            | 0.093849414  |
| 0 | 0            | 0 | -0.004932109 | 0 | -0.069444536 | 0 | 0            | -0.006032695 |
| 0 | 0            | 0 | -0.040007591 | 0 | 0            | 0 | 0            | 0.011755813  |
| 0 | 0.019118288  | 0 | 0            | 0 | 0            | 0 | 0            | 0            |
| 0 | 0.019001564  | 0 | 0            | 0 | 0            | 0 | 0            | 0.04228168   |
| 0 | -0.043876488 | 0 | -0.067475714 | 0 | 0            | 0 | 0            | 0.03136512   |
| 0 | 0            | 0 | 0            | 0 | 0            | 0 | 0            | 0.03040879   |
| 0 | 0.016551621  | 0 | -0.017126596 | 0 | -0.041389251 | 0 | 0            | 0            |
| 0 | -0.00940035  | 0 | 0            | 0 | 0            | 0 | 0            | 0.047518464  |
| 0 | 0.01848133   | 0 | 0            | 0 | 0            | 0 | 0            | 0.01363637   |
| 0 | 0.011102018  | 0 | 0            | 0 | 0            | 0 | 0            | 0.019153829  |

|   |              |   |              |   |              |   |              |   |             |
|---|--------------|---|--------------|---|--------------|---|--------------|---|-------------|
| 0 | 0.046974927  | 0 | 0            | 0 | 0            | 0 | -0.052165905 | 0 | 0           |
| 0 | 0.046656953  | 0 | 0            | 0 | 0            | 0 | 0            | 0 | 0           |
| 0 | 0            | 0 | 0            | 0 | 0            | 0 | -0.051847891 | 0 | 0.058148046 |
| 0 | 0            | 0 | 0            | 0 | 0            | 0 | -0.051560711 | 0 | 0           |
| 0 | 0.046223884  | 0 | 0            | 0 | 0            | 0 | -0.036834826 | 0 | 0           |
| 0 | 0            | 0 | 0            | 0 | -0.034497843 | 0 | -0.047806621 | 0 | 0.058161788 |
| 0 | 0            | 0 | 0            | 0 | -0.034842452 | 0 | -0.04738621  | 0 | 0           |
| 0 | 0.032295281  | 0 | 0            | 0 | 0            | 0 | 0            | 0 | 0           |
| 0 | 0.032477741  | 0 | 0            | 0 | 0            | 0 | 0            | 0 | 0.024825304 |
| 0 | 0            | 0 | 0            | 0 | 0            | 0 | -0.039463425 | 0 | 0.056694602 |
| 0 | 0            | 0 | 0            | 0 | 0            | 0 | -0.038749492 | 0 | 0           |
| 0 | 0            | 0 | 0            | 0 | 0            | 0 | 0            | 0 | 0           |
| 0 | 0            | 0 | 0            | 0 | -0.0432357   | 0 | 0            | 0 | 0           |
| 0 | 0            | 0 | 0            | 0 | 0            | 0 | 0            | 0 | 0.056040287 |
| 0 | 0            | 0 | 0            | 0 | -0.043200203 | 0 | 0            | 0 | 0.057814269 |
| 0 | 0.044801472  | 0 | 0            | 0 | 0            | 0 | 0            | 0 | 0           |
| 0 | 0.047321416  | 0 | 0            | 0 | 0.005821466  | 0 | 0            | 0 | 0           |
| 0 | 0.045479273  | 0 | -0.001647478 | 0 | 0            | 0 | 0            | 0 | 0           |
| 0 | 0.02885726   | 0 | 0            | 0 | 0            | 0 | -0.080014462 | 0 | 0.031522031 |
| 0 | 0.029322317  | 0 | 0            | 0 | 0            | 0 | -0.079976381 | 0 | 0           |
| 0 | 0            | 0 | 0            | 0 | -0.026935864 | 0 | 0            | 0 | 0           |
| 0 | 0            | 0 | 0            | 0 | -0.026929695 | 0 | 0            | 0 | 0.056160139 |
| 0 | 0            | 0 | -0.019438366 | 0 | 0            | 0 | -0.064027944 | 0 | 0.05487501  |
| 0 | 0.04141316   | 0 | 0            | 0 | -0.020413779 | 0 | -0.062285559 | 0 | 0           |
| 0 | 0            | 0 | -0.019676985 | 0 | 0            | 0 | -0.06374296  | 0 | 0           |
| 0 | 0            | 0 | -0.012909156 | 0 | 0            | 0 | 0            | 0 | 0           |
| 0 | 0.042151716  | 0 | -0.012452381 | 0 | 0            | 0 | -0.071170112 | 0 | 0           |
| 0 | 0            | 0 | -0.01289094  | 0 | 0            | 0 | 0            | 0 | 0.053344379 |
| 0 | 0            | 0 | 0            | 0 | 0            | 0 | 0            | 0 | 0           |
| 0 | 0.046777024  | 0 | 0            | 0 | 0            | 0 | -0.077935774 | 0 | 0           |
| 0 | 0            | 0 | 0            | 0 | 0            | 0 | 0            | 0 | 0.054059822 |
| 0 | 0            | 0 | 0            | 0 | 0            | 0 | 0            | 0 | 0.007628622 |
| 0 | 0.039259337  | 0 | 0            | 0 | -0.032352879 | 0 | 0            | 0 | 0           |
| 0 | 0            | 0 | 0            | 0 | 0            | 0 | -0.074828187 | 0 | 0.060241318 |
| 0 | 0            | 0 | 0            | 0 | 0            | 0 | -0.078909155 | 0 | 0.086702893 |
| 0 | 0            | 0 | 0            | 0 | 0            | 0 | -0.074692129 | 0 | 0           |
| 0 | 0            | 0 | 0            | 0 | -0.062568652 | 0 | 0            | 0 | 0           |
| 0 | 0            | 0 | 0            | 0 | -0.062495019 | 0 | 0            | 0 | 0.061523922 |
| 0 | -0.004064799 | 0 | 0            | 0 | -0.070043682 | 0 | 0            | 0 | 0           |
| 0 | 0            | 0 | 0.002127516  | 0 | -0.071515758 | 0 | 0            | 0 | 0           |
| 0 | 0            | 0 | 0            | 0 | -0.069679754 | 0 | 0            | 0 | 0.011762882 |
| 0 | -0.004212884 | 0 | 0            | 0 | -0.070021376 | 0 | 0            | 0 | 0.061978879 |
| 0 | 0            | 0 | 0.002163642  | 0 | -0.071513345 | 0 | 0            | 0 | 0.058432495 |
| 0 | 0.030741043  | 0 | 0            | 0 | 0            | 0 | 0            | 0 | 0           |
| 0 | 0.03081553   | 0 | 0            | 0 | 0            | 0 | 0            | 0 | 0.029236334 |
| 0 | 0.029845048  | 0 | 0            | 0 | 0            | 0 | -0.046325018 | 0 | 0.029959837 |
| 0 | 0.030081094  | 0 | 0            | 0 | 0            | 0 | -0.046180075 | 0 | 0           |

|   |             |   |              |   |              |              |              |             |
|---|-------------|---|--------------|---|--------------|--------------|--------------|-------------|
| 0 | 0.049407291 | 0 | 0            | 0 | 0            | 0            | 0            | 0           |
| 0 | 0.051911117 | 0 | 0.017580945  | 0 | 0            | -0.050130886 | 0            | 0           |
| 0 | 0.046053334 | 0 | 0            | 0 | 0            | -0.033203612 | 0            | 0           |
| 0 | 0           | 0 | 0            | 0 | -0.022071497 | 0            | -0.032280392 | 0.057786179 |
| 0 | 0           | 0 | 0            | 0 | -0.022359949 | 0            | -0.031814556 | 0           |
| 0 | 0           | 0 | 0            | 0 | 0            | 0            | 0            | 0           |
| 0 | 0           | 0 | 0            | 0 | 0            | 0            | 0            | 0.062946762 |
| 0 | 0.047740203 | 0 | 0.003078874  | 0 | 0            | 0            | 0            | 0           |
| 0 | 0.044681149 | 0 | 0            | 0 | 0            | -0.050393883 | 0            | 0           |
| 0 | 0           | 0 | 0            | 0 | -0.023536916 | 0            | -0.037047428 | 0           |
| 0 | 0.045515818 | 0 | 0            | 0 | -0.002718735 | 0            | -0.044687998 | 0           |
| 0 | 0.031228331 | 0 | 0            | 0 | 0            | 0            | 0            | 0           |
| 0 | 0.031361222 | 0 | 0            | 0 | 0            | 0            | 0            | 0.026667472 |
| 0 | 0           | 0 | 0            | 0 | 0            | -0.059861997 | 0            | 0           |
| 0 | 0           | 0 | 0.030695966  | 0 | -0.056899413 | 0            | 0            | 0           |
| 0 | 0           | 0 | 0.030769519  | 0 | -0.05690232  | 0            | 0            | 0.063110062 |
| 0 | 0           | 0 | -0.012246855 | 0 | 0            | 0            | 0            | 0           |
| 0 | 0           | 0 | -0.012189588 | 0 | 0            | 0            | 0            | 0.055927641 |
| 0 | 0           | 0 | 0            | 0 | 0            | -0.03478034  | 0            | 0           |
| 0 | 0.05164361  | 0 | 0.017686146  | 0 | 0            | 0            | 0            | 0           |
| 0 | 0           | 0 | 0            | 0 | 0            | -0.035941902 | 0            | 0.057334799 |
| 0 | 0           | 0 | 0            | 0 | 0            | -0.035219958 | 0            | 0           |
| 0 | 0           | 0 | 0            | 0 | 0            | -0.049240719 | 0            | 0.05612634  |
| 0 | 0           | 0 | 0            | 0 | 0            | 0            | 0            | 0.017501145 |
| 0 | 0           | 0 | 0            | 0 | 0            | -0.04896245  | 0            | 0           |
| 0 | 0.043966627 | 0 | 0            | 0 | 0            | 0            | 0            | 0           |
| 0 | 0           | 0 | 0            | 0 | 0            | -0.039040887 | 0            | 0           |
| 0 | 0           | 0 | 0            | 0 | 0            | 0            | 0            | 0           |
| 0 | 0           | 0 | -0.00046531  | 0 | 0            | -0.046086444 | 0            | 0.057871944 |
| 0 | 0           | 0 | 0            | 0 | 0            | -0.046185832 | 0            | 0.058238237 |
| 0 | 0.029785417 | 0 | 0            | 0 | 0            | -0.035943137 | 0            | 0.028621205 |
| 0 | 0.029928987 | 0 | 0            | 0 | 0            | -0.035581642 | 0            | 0           |
| 0 | 0           | 0 | -0.000654574 | 0 | 0            | -0.045762959 | 0            | 0           |
| 0 | 0           | 0 | -0.009917815 | 0 | 0            | -0.049737385 | 0            | 0           |
| 0 | 0.047482874 | 0 | 0            | 0 | 0.007017438  | 0            | 0            | 0           |
| 0 | 0           | 0 | -0.017212515 | 0 | 0            | -0.033941097 | 0            | 0           |
| 0 | 0           | 0 | 0            | 0 | -0.026029174 | 0            | 0            | 0           |
| 0 | 0           | 0 | 0            | 0 | -0.026022428 | 0            | 0            | 0.05687811  |
| 0 | 0           | 0 | 0            | 0 | -0.038868401 | 0            | -0.054171517 | 0           |
| 0 | 0           | 0 | 0            | 0 | -0.022026271 | 0            | 0            | 0           |
| 0 | 0           | 0 | 0            | 0 | -0.022125612 | 0            | -0.034368527 | 0           |
| 0 | 0.012789492 | 0 | 0            | 0 | -0.036082176 | 0            | 0            | 0           |
| 0 | 0.014582091 | 0 | 0            | 0 | -0.028775589 | 0            | -0.048079735 | 0.044371764 |
| 0 | 0.012754769 | 0 | 0            | 0 | -0.036065057 | 0            | 0            | 0.045721397 |
| 0 | 0.014860626 | 0 | 0            | 0 | -0.028940303 | 0            | -0.04785979  | 0           |
| 0 | 0.043413949 | 0 | 0            | 0 | 0            | -0.036019099 | 0            | 0           |
| 0 | 0           | 0 | 0            | 0 | -0.026384596 | 0            | -0.035363724 | 0.057389136 |

|   |             |   |              |   |              |   |              |             |
|---|-------------|---|--------------|---|--------------|---|--------------|-------------|
| 0 | 0           | 0 | -0.01829109  | 0 | 0            | 0 | 0            | 0           |
| 0 | 0           | 0 | 0            | 0 | -0.026423734 | 0 | -0.034638627 | 0           |
| 0 | 0           | 0 | -0.011549658 | 0 | -0.02491934  | 0 | -0.048013464 | 0           |
| 0 | 0           | 0 | 0            | 0 | -0.040139604 | 0 | 0            | 0           |
| 0 | 0           | 0 | 0            | 0 | -0.039646439 | 0 | 0            | 0.014426147 |
| 0 | 0.047371322 | 0 | 0.038229044  | 0 | -0.04799725  | 0 | 0            | 0           |
| 0 | 0           | 0 | 0            | 0 | -0.040081203 | 0 | 0            | 0.057300752 |
| 0 | 0           | 0 | 0            | 0 | -0.034794933 | 0 | -0.044686651 | 0.056906078 |
| 0 | 0.04671459  | 0 | 0            | 0 | 0.005966638  | 0 | -0.034882241 | 0           |
| 0 | 0.044691429 | 0 | -0.002119307 | 0 | 0            | 0 | -0.03419493  | 0           |
| 0 | 0           | 0 | -0.001503757 | 0 | -0.032486036 | 0 | -0.043035614 | 0.057711849 |
| 0 | 0           | 0 | 0            | 0 | -0.033840491 | 0 | -0.042950101 | 0.053317036 |
| 0 | 0           | 0 | 0            | 0 | -0.03513127  | 0 | -0.044274684 | 0           |
| 0 | 0           | 0 | -0.009565495 | 0 | 0            | 0 | 0            | 0           |
| 0 | 0           | 0 | -0.001586828 | 0 | -0.032754811 | 0 | -0.042622085 | 0           |
| 0 | 0           | 0 | 0            | 0 | -0.023748136 | 0 | 0            | 0           |
| 0 | 0           | 0 | 0            | 0 | 0            | 0 | 0            | 0           |
| 0 | 0           | 0 | -0.012829129 | 0 | 0            | 0 | -0.035560438 | 0.054606205 |
| 0 | 0           | 0 | 0            | 0 | 0            | 0 | 0            | 0.053634956 |
| 0 | 0           | 0 | 0.016775558  | 0 | -0.052990201 | 0 | 0            | 0           |
| 0 | 0           | 0 | -0.026719359 | 0 | 0            | 0 | -0.065929122 | 0           |
| 0 | 0           | 0 | -0.012909492 | 0 | 0            | 0 | -0.03486399  | 0           |
| 0 | 0           | 0 | 0            | 0 | -0.04740652  | 0 | 0            | 0           |
| 0 | 0           | 0 | -0.001260314 | 0 | 0            | 0 | 0            | 0           |
| 0 | 0           | 0 | 0            | 0 | 0            | 0 | 0            | 0.012507906 |
| 0 | 0           | 0 | -0.001212316 | 0 | 0            | 0 | 0            | 0.055922088 |
| 0 | 0.027372553 | 0 | -0.006937119 | 0 | 0            | 0 | 0            | 0           |
| 0 | 0.020819149 | 0 | -0.015689646 | 0 | 0            | 0 | -0.062310267 | 0.035883859 |
| 0 | 0.024825727 | 0 | 0            | 0 | -0.011579859 | 0 | 0            | 0           |
| 0 | 0.027516668 | 0 | -0.006903822 | 0 | 0            | 0 | 0            | 0.028454914 |
| 0 | 0.024974778 | 0 | 0            | 0 | -0.011468437 | 0 | 0            | 0.032263685 |
| 0 | 0.021170198 | 0 | -0.015773919 | 0 | 0            | 0 | -0.062194013 | 0           |
| 0 | 0.03044089  | 0 | 0            | 0 | 0            | 0 | 0            | 0           |
| 0 | 0           | 0 | -0.014358268 | 0 | -0.010357689 | 0 | 0            | 0           |
| 0 | 0.030603083 | 0 | 0            | 0 | 0            | 0 | 0            | 0.02504594  |
| 0 | 0           | 0 | 0            | 0 | 0            | 0 | -0.038182667 | 0.054172812 |
| 0 | 0.030741646 | 0 | 0            | 0 | 0            | 0 | 0            | -0.02057145 |
| 0 | 0           | 0 | 0            | 0 | 0            | 0 | -0.037513468 | 0           |
| 0 | 0.034171989 | 0 | 0            | 0 | -0.059231421 | 0 | 0            | 0           |
| 0 | 0           | 0 | 0            | 0 | 0            | 0 | -0.037009673 | 0.046505661 |
| 0 | 0.029513309 | 0 | -0.003167424 | 0 | -0.064627348 | 0 | 0            | 0           |
| 0 | 0.04228093  | 0 | -0.004286399 | 0 | 0            | 0 | 0            | 0           |
| 0 | 0           | 0 | 0            | 0 | -0.028256021 | 0 | 0            | 0           |
| 0 | 0.044255284 | 0 | 0            | 0 | 0.002523863  | 0 | 0            | 0           |
| 0 | 0           | 0 | -0.020037708 | 0 | 0            | 0 | -0.058225977 | 0.064363337 |
| 0 | 0           | 0 | -0.020067596 | 0 | 0            | 0 | -0.058168813 | 0.054576286 |
| 0 | 0           | 0 | -0.004039738 | 0 | -0.024526101 | 0 | 0            | 0           |



|   |             |   |              |   |              |   |              |              |
|---|-------------|---|--------------|---|--------------|---|--------------|--------------|
| 0 | 0           | 0 | 0            | 0 | -0.028252883 | 0 | 0            | 0.054708174  |
| 0 | 0.027672436 | 0 | 0            | 0 | 0            | 0 | -0.071094651 | 0.033850169  |
| 0 | 0           | 0 | 0            | 0 | -0.028464497 | 0 | 0            | 0.011070655  |
| 0 | 0           | 0 | -0.0040038   | 0 | -0.02455502  | 0 | 0            | 0.055507026  |
| 0 | 0.045095366 | 0 | -0.007720869 | 0 | 0.010297515  | 0 | 0            | 0            |
| 0 | 0.02252496  | 0 | 0            | 0 | 0            | 0 | -0.048991273 | 0.038168861  |
| 0 | 0           | 0 | -0.02030134  | 0 | 0            | 0 | -0.057884089 | 0            |
| 0 | 0.028120105 | 0 | 0            | 0 | 0            | 0 | -0.071033737 | 0            |
| 0 | 0.022815002 | 0 | 0            | 0 | 0            | 0 | -0.048805233 | 0            |
| 0 | 0.027368518 | 0 | 0            | 0 | 0            | 0 | -0.074547153 | 0.057603896  |
| 0 | 0.040112356 | 0 | -0.00471127  | 0 | -0.016012057 | 0 | -0.05711857  | 0            |
| 0 | 0.039735166 | 0 | 0            | 0 | -0.021240751 | 0 | -0.058442446 | 0            |
| 0 | 0           | 0 | -0.014589514 | 0 | 0            | 0 | 0            | 0            |
| 0 | 0           | 0 | -0.014572456 | 0 | 0            | 0 | 0            | 0.051310789  |
| 0 | 0           | 0 | -0.014517094 | 0 | 0            | 0 | 0            | 0.007565274  |
| 0 | 0.039246305 | 0 | 0            | 0 | -0.02891057  | 0 | 0            | 0            |
| 0 | 0           | 0 | 0            | 0 | -0.0137322   | 0 | -0.040236068 | 0.059180587  |
| 0 | 0.040803755 | 0 | -0.013583552 | 0 | 0            | 0 | -0.065439713 | 0            |
| 0 | 0           | 0 | 0            | 0 | -0.014025664 | 0 | -0.039758363 | 0            |
| 0 | 0.050690247 | 0 | 0.022748436  | 0 | 0            | 0 | -0.053937569 | 0            |
| 0 | 0           | 0 | 0            | 0 | 0            | 0 | -0.038810547 | 0.058651124  |
| 0 | 0           | 0 | 0            | 0 | 0            | 0 | -0.038071443 | 0            |
| 0 | 0           | 0 | 0            | 0 | 0            | 0 | -0.05239245  | 0.057171337  |
| 0 | 0           | 0 | 0            | 0 | 0            | 0 | -0.052106536 | 0            |
| 0 | 0           | 0 | 0.005454164  | 0 | 0            | 0 | -0.050109578 | 0.060241698  |
| 0 | 0           | 0 | 0.005256656  | 0 | 0            | 0 | -0.049770513 | 0            |
| 0 | 0           | 0 | 0            | 0 | 0            | 0 | -0.048928801 | 0.057617868  |
| 0 | 0           | 0 | 0            | 0 | 0            | 0 | 0            | 0.007982091  |
| 0 | 0.0430593   | 0 | 0            | 0 | 0            | 0 | -0.036011798 | 0            |
| 0 | 0.030131586 | 0 | 0            | 0 | 0            | 0 | 0            | 0            |
| 0 | 0.030161186 | 0 | 0            | 0 | 0            | 0 | 0            | 0.033624693  |
| 0 | 0.041375554 | 0 | 0            | 0 | 0            | 0 | -0.053987076 | 0            |
| 0 | 0           | 0 | 0            | 0 | 0            | 0 | -0.070879454 | 0.083358652  |
| 0 | 0.023891313 | 0 | 0            | 0 | 0            | 0 | 0            | 0            |
| 0 | 0.0239853   | 0 | 0            | 0 | 0            | 0 | 0            | 0.034868643  |
| 0 | 0.044492907 | 0 | 0            | 0 | 0.005496121  | 0 | -0.052510243 | 0            |
| 0 | 0           | 0 | -0.043801157 | 0 | 0            | 0 | 0            | 0            |
| 0 | 0           | 0 | -0.043730914 | 0 | 0            | 0 | 0            | 0.05952013   |
| 0 | 0           | 0 | 0.034278606  | 0 | -0.054660809 | 0 | 0            | 0            |
| 0 | 0           | 0 | 0.034348584  | 0 | -0.054659795 | 0 | 0            | 0.065124083  |
| 0 | 0.050322598 | 0 | 0.022755698  | 0 | 0            | 0 | 0            | 0            |
| 0 | 0.022216867 | 0 | 0            | 0 | 0            | 0 | -0.039258995 | 0.037106044  |
| 0 | 0.022423375 | 0 | 0            | 0 | 0            | 0 | -0.038789558 | 0            |
| 0 | 0.029573673 | 0 | 0            | 0 | 0            | 0 | 0            | -0.010514931 |
| 0 | 0.029110971 | 0 | -0.000806297 | 0 | 0            | 0 | 0            | 0            |
| 0 | 0.029192065 | 0 | -0.000766728 | 0 | 0            | 0 | 0            | 0.03044687   |
| 0 | 0           | 0 | 0            | 0 | -0.060242894 | 0 | 0            | 0.017990264  |

|   |              |   |              |   |              |   |              |             |
|---|--------------|---|--------------|---|--------------|---|--------------|-------------|
| 0 | -0.000285729 | 0 | 0            | 0 | -0.060337249 | 0 | 0            | 0           |
| 0 | 0            | 0 | -0.000172208 | 0 | -0.060127494 | 0 | 0            | 0           |
| 0 | -0.000442071 | 0 | 0            | 0 | -0.060296035 | 0 | 0            | 0.060900254 |
| 0 | 0            | 0 | -0.000126743 | 0 | -0.060094214 | 0 | 0            | 0.060492013 |
| 0 | 0            | 0 | 0            | 0 | -0.013802186 | 0 | 0            | 0           |
| 0 | 0            | 0 | 0            | 0 | -0.013793157 | 0 | 0            | 0.057774582 |
| 0 | -0.003609866 | 0 | 0            | 0 | -0.06599392  | 0 | 0            | 0.017674516 |
| 0 | -0.00346861  | 0 | -0.000137345 | 0 | -0.065874428 | 0 | 0            | 0           |
| 0 | 0            | 0 | 0            | 0 | 0            | 0 | 0            | 0           |
| 0 | 0            | 0 | 2.98E-05     | 0 | -0.065707142 | 0 | 0            | 0.014157943 |
| 0 | -0.003629778 | 0 | -9.78E-05    | 0 | -0.065888778 | 0 | 0            | 0.061260458 |
| 0 | 0.047429143  | 0 | 0            | 0 | 0.019619168  | 0 | 0            | 0           |
| 0 | 0            | 0 | 0            | 0 | 0            | 0 | 0            | 0.054608615 |
| 0 | 0.040603346  | 0 | 0            | 0 | 0            | 0 | 0            | 0           |
| 0 | 0.049892392  | 0 | 0.005506537  | 0 | 0            | 0 | 0            | 0           |
| 0 | 0            | 0 | 0.004599857  | 0 | 0            | 0 | 0            | 0           |
| 0 | 0            | 0 | 0.004645367  | 0 | 0            | 0 | 0            | 0.05814336  |
| 0 | 0            | 0 | 0            | 0 | 0            | 0 | 0            | 0.009253832 |
| 0 | 0            | 0 | 0            | 0 | -0.013856566 | 0 | -0.039174983 | 0.058381671 |
| 0 | 0            | 0 | -0.008960113 | 0 | 0            | 0 | -0.038992657 | 0.056548002 |
| 0 | 0            | 0 | 0            | 0 | -0.013889624 | 0 | -0.038440127 | 0           |
| 0 | 0            | 0 | -0.009042721 | 0 | 0            | 0 | -0.038271803 | 0           |
| 0 | 0            | 0 | 0            | 0 | 0            | 0 | -0.041252596 | 0.05521466  |
| 0 | 0.0216829    | 0 | 0.026193416  | 0 | 0            | 0 | -0.062821161 | 0.046377804 |
| 0 | 0            | 0 | 0            | 0 | 0            | 0 | -0.040571769 | 0           |
| 0 | 0.022053808  | 0 | 0.026225543  | 0 | 0            | 0 | -0.062627859 | 0           |
| 0 | 0            | 0 | -0.010313973 | 0 | 0            | 0 | 0            | 0           |
| 0 | 0            | 0 | -0.010239498 | 0 | 0            | 0 | 0            | 0.059608018 |
| 0 | 0            | 0 | 0            | 0 | 0            | 0 | -0.039954301 | 0.045921386 |
| 0 | 0            | 0 | 0            | 0 | -0.026287434 | 0 | -0.040245627 | 0           |
| 0 | 0.046669429  | 0 | 0            | 0 | 0.018896748  | 0 | -0.038743843 | 0           |
| 0 | 0.039973345  | 0 | 0            | 0 | 0            | 0 | -0.039225998 | 0           |
| 0 | 0.009167509  | 0 | 0            | 0 | -0.023731336 | 0 | -0.055973996 | 0.05090436  |
| 0 | 0            | 0 | 0.02879051   | 0 | -0.018006327 | 0 | -0.051822055 | 0.067012486 |
| 0 | 0            | 0 | 0            | 0 | 0            | 0 | 0            | 0.024172429 |
| 0 | 0            | 0 | 0.017574599  | 0 | 0            | 0 | -0.046439003 | 0.063972793 |
| 0 | 0.009515737  | 0 | 0            | 0 | -0.023905096 | 0 | -0.055734316 | 0           |
| 0 | 0            | 0 | 0.028802243  | 0 | -0.018297066 | 0 | -0.051336296 | 0           |
| 0 | 0            | 0 | 0.017446547  | 0 | 0            | 0 | -0.045624728 | 0           |
| 0 | 0            | 0 | 0            | 0 | -0.027704287 | 0 | -0.053987781 | 0.058636152 |
| 0 | 0            | 0 | -0.003137908 | 0 | -0.024204098 | 0 | -0.052805459 | 0.058883241 |
| 0 | 0            | 0 | 0            | 0 | -0.026958028 | 0 | -0.052717446 | 0.059690028 |
| 0 | 0            | 0 | -0.010039219 | 0 | -0.061183176 | 0 | 0            | 0           |
| 0 | 0            | 0 | 0            | 0 | -0.02805049  | 0 | -0.053568032 | 0           |
| 0 | 0            | 0 | -0.003232364 | 0 | -0.024467485 | 0 | -0.052384441 | 0           |
| 0 | 0            | 0 | -0.011594431 | 0 | 0            | 0 | 0            | 0.015969328 |
| 0 | 0            | 0 | 0.016324992  | 0 | 0            | 0 | -0.063541535 | 0.062346467 |

|   |              |   |              |   |              |   |              |   |              |
|---|--------------|---|--------------|---|--------------|---|--------------|---|--------------|
| 0 | 0            | 0 | 0            | 0 | 0            | 0 | -0.03599315  | 0 | 0            |
| 0 | 0            | 0 | 0.01614386   | 0 | 0            | 0 | -0.063206021 | 0 | 0            |
| 0 | 0.006508015  | 0 | 0            | 0 | -0.033452748 | 0 | 0            | 0 | 0            |
| 0 | 0.042555328  | 0 | 0.000895256  | 0 | 0            | 0 | -0.037463683 | 0 | 0            |
| 0 | 0.006437816  | 0 | 0            | 0 | -0.0334389   | 0 | 0            | 0 | 0.05301585   |
| 0 | 0            | 0 | 0.016370808  | 0 | 0            | 0 | -0.059836222 | 0 | 0.06541688   |
| 0 | 0            | 0 | 0            | 0 | 0            | 0 | -0.047444683 | 0 | 0.057496594  |
| 0 | 0            | 0 | 0            | 0 | -0.035308174 | 0 | 0            | 0 | 0.012083989  |
| 0 | 0            | 0 | 0            | 0 | -0.035124923 | 0 | 0            | 0 | 0            |
| 0 | 0            | 0 | 0            | 0 | 0            | 0 | -0.046729758 | 0 | 0            |
| 0 | 0            | 0 | 0            | 0 | -0.03506523  | 0 | 0            | 0 | 0.059201114  |
| 0 | 0.014007058  | 0 | -0.014047582 | 0 | 0            | 0 | -0.06684731  | 0 | 0.043954425  |
| 0 | 0.014411578  | 0 | -0.0141528   | 0 | 0            | 0 | -0.066700391 | 0 | 0            |
| 0 | 0            | 0 | 0            | 0 | 0.010851539  | 0 | -0.045738494 | 0 | 0.060731624  |
| 0 | 0            | 0 | 0            | 0 | 0.010807429  | 0 | -0.044971217 | 0 | 0            |
| 0 | 0.022934717  | 0 | 0            | 0 | 0            | 0 | 0            | 0 | 0            |
| 0 | 0.020757496  | 0 | -0.004999741 | 0 | 0            | 0 | 0            | 0 | 0            |
| 0 | 0.008244574  | 0 | 0            | 0 | 0            | 0 | -0.046148237 | 0 | 0.053852768  |
| 0 | 0.023059534  | 0 | 0            | 0 | 0            | 0 | 0            | 0 | 0.033116892  |
| 0 | 0.008545658  | 0 | 0            | 0 | 0            | 0 | -0.045478703 | 0 | 0            |
| 0 | 0.020862348  | 0 | -0.004971976 | 0 | 0            | 0 | 0            | 0 | 0.036273202  |
| 0 | 0.023199488  | 0 | 0            | 0 | 0            | 0 | 0            | 0 | -0.016355726 |
| 0 | 0.022859132  | 0 | 0            | 0 | -0.000406135 | 0 | 0            | 0 | 0            |
| 0 | 0.023022208  | 0 | 0            | 0 | -0.000281431 | 0 | 0            | 0 | 0.03502662   |
| 0 | 0            | 0 | 0            | 0 | 0            | 0 | -0.045752424 | 0 | 0.045094387  |
| 0 | 0.007395984  | 0 | 0            | 0 | 0            | 0 | -0.061923471 | 0 | 0.053120375  |
| 0 | 0            | 0 | -0.017006071 | 0 | 0            | 0 | -0.064082267 | 0 | 0.067495202  |
| 0 | 0            | 0 | -0.017039739 | 0 | 0            | 0 | -0.064017959 | 0 | 0.056501454  |
| 0 | 0.0077770547 | 0 | 0            | 0 | 0            | 0 | -0.061682301 | 0 | 0            |
| 0 | 0.012271477  | 0 | 0            | 0 | 0.008283877  | 0 | -0.063059198 | 0 | 0.050722027  |
| 0 | 0            | 0 | -0.017283318 | 0 | 0            | 0 | -0.063722049 | 0 | 0            |
| 0 | 0.012623423  | 0 | 0            | 0 | 0.008244529  | 0 | -0.06281751  | 0 | 0            |
| 0 | 0.049078948  | 0 | 0            | 0 | 0.046294102  | 0 | -0.045522682 | 0 | 0            |
| 0 | 0            | 0 | 0            | 0 | 0.001086168  | 0 | -0.061920701 | 0 | 0.059838358  |
| 0 | 0            | 0 | 0            | 0 | 0            | 0 | -0.061402587 | 0 | 0.057954457  |
| 0 | 0.007584372  | 0 | 0            | 0 | 0            | 0 | -0.058225722 | 0 | 0.050053742  |
| 0 | 0            | 0 | 0            | 0 | 0.000831291  | 0 | -0.061501752 | 0 | 0            |
| 0 | 0            | 0 | -0.009510869 | 0 | 0            | 0 | -0.053059939 | 0 | 0            |
| 0 | 0            | 0 | 0            | 0 | 0.002293439  | 0 | -0.058877368 | 0 | 0.0592177    |
| 0 | 0.020131257  | 0 | 0            | 0 | 0            | 0 | -0.075021115 | 0 | 0.042041288  |
| 0 | 0            | 0 | -0.021230807 | 0 | 0            | 0 | 0            | 0 | 0            |
| 0 | 0.019902099  | 0 | 0            | 0 | 0            | 0 | -0.077849374 | 0 | 0.064989458  |
| 0 | 0            | 0 | 0            | 0 | -0.02262579  | 0 | 0            | 0 | 0            |
| 0 | 0.020635595  | 0 | 0            | 0 | 0            | 0 | -0.074938135 | 0 | 0            |
| 0 | 0.045663029  | 0 | 0.040352731  | 0 | -0.045078855 | 0 | 0            | 0 | 0            |
| 0 | 0            | 0 | 0.005278158  | 0 | -0.026145064 | 0 | -0.030836795 | 0 | 0            |
| 0 | 0.049543681  | 0 | 0.037652048  | 0 | 0            | 0 | -0.047114905 | 0 | 0            |

|   |              |   |              |   |              |   |              |   |             |
|---|--------------|---|--------------|---|--------------|---|--------------|---|-------------|
| 0 | 0            | 0 | 0            | 0 | -0.021570182 | 0 | -0.03096693  | 0 | 0           |
| 0 | 0            | 0 | -0.018293191 | 0 | 0            | 0 | -0.034750051 | 0 | 0           |
| 0 | 0            | 0 | -0.010916553 | 0 | 0            | 0 | 0            | 0 | 0           |
| 0 | 0            | 0 | 0            | 0 | -0.015909778 | 0 | 0            | 0 | 0           |
| 0 | 0.037433781  | 0 | -0.041991108 | 0 | 0            | 0 | 0            | 0 | 0           |
| 0 | 0            | 0 | -0.006679053 | 0 | -0.009666741 | 0 | 0            | 0 | 0           |
| 0 | 0            | 0 | -0.010899773 | 0 | 0            | 0 | 0            | 0 | 0.052896049 |
| 0 | 0            | 0 | 0            | 0 | -0.015903738 | 0 | 0            | 0 | 0.055250936 |
| 0 | 0            | 0 | -0.006650542 | 0 | -0.009685133 | 0 | 0            | 0 | 0.055888645 |
| 0 | 0            | 0 | -0.010827484 | 0 | 0            | 0 | 0            | 0 | 0.004969434 |
| 0 | 0            | 0 | 0            | 0 | -0.016123582 | 0 | 0            | 0 | 0.007494558 |
| 0 | 0.04382007   | 0 | 0            | 0 | 0.014963227  | 0 | 0            | 0 | 0           |
| 0 | 0.044630899  | 0 | -0.010605724 | 0 | 0.025448799  | 0 | 0            | 0 | 0           |
| 0 | 0            | 0 | 0            | 0 | -0.023039748 | 0 | -0.035268372 | 0 | 0           |
| 0 | 0            | 0 | 0            | 0 | 0            | 0 | 0            | 0 | 0.004263001 |
| 0 | 0.046468693  | 0 | 0.034427391  | 0 | 0            | 0 | -0.071925606 | 0 | 0           |
| 0 | 0            | 0 | -0.008575173 | 0 | 0            | 0 | 0            | 0 | 0           |
| 0 | 0            | 0 | -0.009073799 | 0 | 0            | 0 | -0.031625412 | 0 | 0           |
| 0 | 0.022456831  | 0 | 0.027271783  | 0 | 0            | 0 | 0            | 0 | 0           |
| 0 | 0.039695615  | 0 | -0.001583101 | 0 | 0            | 0 | 0            | 0 | 0           |
| 0 | 0.02255003   | 0 | 0.027351329  | 0 | 0            | 0 | 0            | 0 | 0.043539805 |
| 0 | 0            | 0 | 0            | 0 | 0            | 0 | -0.074853875 | 0 | 0.08365397  |
| 0 | 0            | 0 | 0.019473653  | 0 | -0.057090282 | 0 | 0            | 0 | 0           |
| 0 | 0.04891618   | 0 | 0.033249348  | 0 | 0.003212885  | 0 | -0.067980723 | 0 | 0           |
| 0 | 0            | 0 | -0.012531733 | 0 | -0.027442142 | 0 | -0.050425204 | 0 | 0           |
| 0 | 0.022058082  | 0 | 0            | 0 | 0.025061283  | 0 | -0.047600631 | 0 | 0.039026759 |
| 0 | 0.022354541  | 0 | 0            | 0 | 0.025236937  | 0 | -0.047116291 | 0 | 0           |
| 0 | -0.000142928 | 0 | -0.059503991 | 0 | 0            | 0 | 0            | 0 | 0           |
| 0 | 0            | 0 | -0.059487554 | 0 | 0            | 0 | 0            | 0 | 0.004128464 |
| 0 | -0.000193938 | 0 | -0.059479785 | 0 | 0            | 0 | 0            | 0 | 0.048054782 |
| 0 | 0.024712209  | 0 | 0            | 0 | 0.028737076  | 0 | 0            | 0 | 0           |
| 0 | 0            | 0 | 0.017119934  | 0 | 0            | 0 | 0            | 0 | 0           |
| 0 | 0            | 0 | 0.004661263  | 0 | -0.027648169 | 0 | 0            | 0 | 0           |
| 0 | 0.024981739  | 0 | 0            | 0 | 0.028985625  | 0 | 0            | 0 | 0.035563924 |
| 0 | 0            | 0 | -0.0150365   | 0 | -0.009341341 | 0 | -0.03124789  | 0 | 0           |
| 0 | 0            | 0 | 0.017188434  | 0 | 0            | 0 | 0            | 0 | 0.059520366 |
| 0 | 0.038188859  | 0 | -0.007140939 | 0 | -0.00744799  | 0 | -0.066457591 | 0 | 0           |
| 0 | 0.038107524  | 0 | -0.01162132  | 0 | 0            | 0 | -0.071265994 | 0 | 0           |
| 0 | 0            | 0 | 0.022495639  | 0 | -0.008730537 | 0 | 0            | 0 | 0           |
| 0 | 0.038090317  | 0 | 0            | 0 | -0.014701857 | 0 | -0.067831634 | 0 | 0           |
| 0 | 0            | 0 | -0.015588008 | 0 | -0.010181673 | 0 | 0            | 0 | 0           |
| 0 | 0            | 0 | 0.022565033  | 0 | -0.008713289 | 0 | 0            | 0 | 0.06401106  |
| 0 | 0            | 0 | 0            | 0 | 0.009789936  | 0 | -0.048582825 | 0 | 0.056983774 |
| 0 | 0            | 0 | 0.016870845  | 0 | 0            | 0 | 0            | 0 | 0.005359886 |
| 0 | 0            | 0 | 0            | 0 | 0.009751212  | 0 | -0.047874137 | 0 | 0           |
| 0 | 0.007031636  | 0 | 0            | 0 | 0            | 0 | -0.048918577 | 0 | 0.051198982 |
| 0 | 0.007309196  | 0 | 0            | 0 | 0            | 0 | -0.048291792 | 0 | 0           |

|   |             |   |              |   |              |   |              |   |              |
|---|-------------|---|--------------|---|--------------|---|--------------|---|--------------|
| 0 | 0           | 0 | -0.008610317 | 0 | 0.017536867  | 0 | -0.046690632 | 0 | 0.058526339  |
| 0 | 0           | 0 | -0.008717809 | 0 | 0.017589921  | 0 | -0.045941251 | 0 | 0            |
| 0 | 0           | 0 | 0            | 0 | 0            | 0 | -0.048540113 | 0 | 0.040829102  |
| 0 | 0           | 0 | -9.55E-05    | 0 | 0            | 0 | -0.048743654 | 0 | 0.057608552  |
| 0 | 0           | 0 | -0.000178267 | 0 | 0            | 0 | -0.048022874 | 0 | 0            |
| 0 | 0.022891622 | 0 | 0            | 0 | 0            | 0 | 0            | 0 | 0            |
| 0 | 0.022877756 | 0 | 0            | 0 | 0            | 0 | 0            | 0 | 0.041719142  |
| 0 | 0           | 0 | 0            | 0 | 0.01158572   | 0 | 0            | 0 | 0            |
| 0 | 0           | 0 | 0            | 0 | 0.009620466  | 0 | -0.047146233 | 0 | 0.044964645  |
| 0 | 0.00861646  | 0 | 0.002888276  | 0 | 0            | 0 | -0.047896268 | 0 | 0.053267406  |
| 0 | 0           | 0 | 0            | 0 | 0.01165585   | 0 | 0            | 0 | 0.056389419  |
| 0 | 0.008930924 | 0 | 0.002918169  | 0 | 0            | 0 | -0.047236533 | 0 | 0            |
| 0 | 0.007125837 | 0 | 0            | 0 | 0            | 0 | -0.047472163 | 0 | 0.036690983  |
| 0 | 0.007553648 | 0 | 0            | 0 | 0            | 0 | 0            | 0 | 0            |
| 0 | 0.045405462 | 0 | 0            | 0 | 0.044445256  | 0 | 0            | 0 | 0            |
| 0 | 0           | 0 | 3.05E-05     | 0 | 0            | 0 | -0.047309957 | 0 | 0.044316441  |
| 0 | 0.007576388 | 0 | 0            | 0 | 0            | 0 | 0            | 0 | 0.050225606  |
| 0 | 0.044548139 | 0 | 0            | 0 | 0.041978991  | 0 | -0.048935259 | 0 | 0            |
| 0 | 0.032759088 | 0 | -0.005178736 | 0 | -0.052693456 | 0 | 0            | 0 | 0            |
| 0 | 0           | 0 | 0            | 0 | 0.01138581   | 0 | 0            | 0 | 0.000770481  |
| 0 | 0           | 0 | 0            | 0 | 0            | 0 | 0            | 0 | -0.004690883 |
| 0 | 0.050516821 | 0 | 0.017483695  | 0 | 0.032345458  | 0 | 0            | 0 | 0            |
| 0 | 0.032597937 | 0 | 0            | 0 | 0            | 0 | -0.047853525 | 0 | 0            |
| 0 | 0.040366357 | 0 | 0            | 0 | 0.021004518  | 0 | -0.076922402 | 0 | 0            |
| 0 | 0.007712895 | 0 | 0            | 0 | 0            | 0 | 0            | 0 | -0.008623689 |
| 0 | 0.045970661 | 0 | -0.012980587 | 0 | 0.054674219  | 0 | -0.046290649 | 0 | 0            |
| 0 | 0.03730285  | 0 | 0            | 0 | -0.024561556 | 0 | 0            | 0 | 0            |
| 0 | 0.045299089 | 0 | 0.035777618  | 0 | 0            | 0 | 0            | 0 | 0            |
| 0 | 0.023330855 | 0 | 0.00207788   | 0 | 0            | 0 | 0            | 0 | 0            |
| 0 | 0.022405738 | 0 | 0            | 0 | 0            | 0 | 0            | 0 | -0.006021911 |
| 0 | 0.023373739 | 0 | 0.00211421   | 0 | 0            | 0 | 0            | 0 | 0.03770776   |
| 0 | 0           | 0 | 0            | 0 | 0            | 0 | -0.038928961 | 0 | 0            |
| 0 | 0           | 0 | -0.005302315 | 0 | 0            | 0 | 0            | 0 | 0            |
| 0 | 0           | 0 | -0.005227875 | 0 | 0            | 0 | 0            | 0 | 0.061932322  |
| 0 | 0           | 0 | 0            | 0 | 0            | 0 | 0            | 0 | 0.021469282  |
| 0 | 0           | 0 | 0            | 0 | -0.017956877 | 0 | -0.048175765 | 0 | 0            |
| 0 | 0           | 0 | -0.006698054 | 0 | 0            | 0 | 0            | 0 | 0.014683034  |
| 0 | 0.00912711  | 0 | -0.041517839 | 0 | 0            | 0 | 0            | 0 | 0            |
| 0 | 0.009025599 | 0 | -0.04148063  | 0 | 0            | 0 | 0            | 0 | 0.050576402  |
| 0 | 0.048154894 | 0 | 0.009473502  | 0 | 0            | 0 | 0            | 0 | 0            |
| 0 | 0           | 0 | -0.003903855 | 0 | 0            | 0 | -0.057549771 | 0 | 0            |
| 0 | 0           | 0 | -0.042983776 | 0 | 0            | 0 | 0            | 0 | 0.019739397  |
| 0 | 0.021698659 | 0 | -0.01151552  | 0 | 0.035885952  | 0 | 0            | 0 | 0            |
| 0 | 0.021990624 | 0 | -0.011561163 | 0 | 0.036191965  | 0 | 0            | 0 | 0.035595643  |
| 0 | 0.021215333 | 0 | 0            | 0 | 0.025113742  | 0 | 0            | 0 | 0            |
| 0 | 0.021510526 | 0 | 0            | 0 | 0.025381301  | 0 | 0            | 0 | 0.035964254  |
| 0 | 0.021559944 | 0 | 0            | 0 | 0.025217768  | 0 | 0            | 0 | -0.024029847 |

|   |              |   |              |   |              |   |              |              |
|---|--------------|---|--------------|---|--------------|---|--------------|--------------|
| 0 | -0.008146317 | 0 | 0            | 0 | -0.059941835 | 0 | 0            | 0            |
| 0 | -0.008350677 | 0 | 0            | 0 | -0.059896829 | 0 | 0            | 0.070290602  |
| 0 | -0.002435685 | 0 | -0.00552165  | 0 | -0.007447075 | 0 | -0.078244853 | 0.06429059   |
| 0 | 0            | 0 | -0.005483966 | 0 | -0.006411216 | 0 | -0.07943224  | 0.075049404  |
| 0 | 0            | 0 | -0.005483813 | 0 | -0.006297414 | 0 | -0.078959413 | 0.062279425  |
| 0 | -0.002307834 | 0 | 0            | 0 | -0.01210283  | 0 | -0.07834936  | 0.077527318  |
| 0 | 0            | 0 | -0.001785538 | 0 | -0.056638342 | 0 | 0            | 0            |
| 0 | 0            | 0 | -0.009191357 | 0 | 0            | 0 | -0.081025512 | 0.076848609  |
| 0 | -0.002237491 | 0 | 0            | 0 | -0.012023711 | 0 | -0.078057203 | 0.065261212  |
| 0 | 0            | 0 | 0            | 0 | -0.058147454 | 0 | 0            | 0.017052523  |
| 0 | -0.00017124  | 0 | -0.009282313 | 0 | 0            | 0 | -0.080898156 | 0.061864275  |
| 0 | -0.000333704 | 0 | -0.009477332 | 0 | 0            | 0 | -0.081767106 | 0.078602785  |
| 0 | 0            | 0 | 0            | 0 | -0.010973401 | 0 | -0.079014187 | 0.076147522  |
| 0 | 0            | 0 | -0.001742636 | 0 | -0.056600447 | 0 | 0            | 0.062691329  |
| 0 | -0.001977912 | 0 | -0.005643734 | 0 | -0.00747497  | 0 | -0.078086206 | 0            |
| 0 | 0            | 0 | -0.0056105   | 0 | -0.006504779 | 0 | -0.078607857 | 0            |
| 0 | 0            | 0 | -0.014622527 | 0 | 0            | 0 | -0.038217764 | 0            |
| 0 | 0            | 0 | 0.047102455  | 0 | -0.052285064 | 0 | 0            | 0            |
| 0 | 0            | 0 | -0.011280098 | 0 | 0.020606587  | 0 | 0            | 0            |
| 0 | 0            | 0 | 0.047860464  | 0 | -0.053467705 | 0 | 0            | 0.013376508  |
| 0 | -0.000555519 | 0 | 0.047641465  | 0 | -0.053532255 | 0 | 0            | 0            |
| 0 | -0.001761106 | 0 | 0            | 0 | -0.012143252 | 0 | -0.077873378 | 0            |
| 0 | 0.000306746  | 0 | -0.009402848 | 0 | 0            | 0 | -0.080738064 | 0            |
| 0 | 0            | 0 | 0.047166792  | 0 | -0.052230708 | 0 | 0            | 0.072166442  |
| 0 | -0.000728259 | 0 | 0.047670665  | 0 | -0.053541283 | 0 | 0            | 0.072286638  |
| 0 | 0            | 0 | -0.011283259 | 0 | 0.020683458  | 0 | 0            | 0.054339944  |
| 0 | 0            | 0 | 0            | 0 | -0.008984583 | 0 | -0.034594971 | 0            |
| 0 | 0            | 0 | 0            | 0 | -0.010357819 | 0 | 0            | 0            |
| 0 | 0            | 0 | -0.010949173 | 0 | 0.020173219  | 0 | 0            | -0.004049534 |
| 0 | -0.012127526 | 0 | 0            | 0 | -0.066696632 | 0 | 0            | 0.02362923   |
| 0 | -0.012004826 | 0 | -0.002016669 | 0 | -0.064970876 | 0 | 0            | 0            |
| 0 | 0            | 0 | 0.006307248  | 0 | -0.018376836 | 0 | -0.038597559 | 0            |
| 0 | -0.012212627 | 0 | -0.001967604 | 0 | -0.064991523 | 0 | 0            | 0.070411157  |
| 0 | 0            | 0 | -0.003312865 | 0 | 0            | 0 | -0.034882357 | 0            |
| 0 | 0.004318311  | 0 | 0            | 0 | 0            | 0 | -0.086528016 | 0.081272056  |
| 0 | 0.035322476  | 0 | 0.009273376  | 0 | 0            | 0 | -0.049796486 | 0            |
| 0 | 0            | 0 | 0            | 0 | 0.010258416  | 0 | 0            | -0.005143991 |
| 0 | 0            | 0 | -0.002921186 | 0 | 0            | 0 | 0            | 0            |
| 0 | 0.04241127   | 0 | -0.015317563 | 0 | 0.054977055  | 0 | 0            | 0            |
| 0 | 0.006956533  | 0 | 0.001171423  | 0 | 0            | 0 | 0            | 0            |
| 0 | 0.006450864  | 0 | 0            | 0 | 0            | 0 | 0            | -0.012982253 |
| 0 | 0.007002225  | 0 | 0.001215069  | 0 | 0            | 0 | 0            | 0.051041998  |
| 0 | 0            | 0 | -0.001564259 | 0 | -0.064241564 | 0 | 0            | 0.011454167  |
| 0 | 0            | 0 | -0.001135718 | 0 | 0            | 0 | 0            | -0.006301164 |
| 0 | 0.007223405  | 0 | 0.001359367  | 0 | 0            | 0 | 0            | -0.010142249 |
| 0 | 0            | 0 | 0            | 0 | -0.010458418 | 0 | -0.039212096 | 0            |
| 0 | 0.027961092  | 0 | 0            | 0 | 0            | 0 | 0            | 0            |

|   |              |   |              |   |              |   |              |             |
|---|--------------|---|--------------|---|--------------|---|--------------|-------------|
| 0 | 0.027790105  | 0 | 0            | 0 | 0            | 0 | 0            | 0.050421611 |
| 0 | 0            | 0 | -0.017635439 | 0 | 0.0057082    | 0 | -0.034859175 | 0           |
| 0 | 0            | 0 | 0.002342295  | 0 | -0.013114474 | 0 | 0            | 0           |
| 0 | 0            | 0 | 0            | 0 | 0.015235723  | 0 | -0.04647443  | 0           |
| 0 | 0            | 0 | 0.011245337  | 0 | 0            | 0 | -0.047069131 | 0           |
| 0 | 0            | 0 | -0.01449573  | 0 | -0.018697231 | 0 | -0.059855358 | 0           |
| 0 | 0            | 0 | -0.0182738   | 0 | 0.004651275  | 0 | 0            | 0           |
| 0 | 0            | 0 | 0.022067222  | 0 | -0.053770517 | 0 | 0            | 0           |
| 0 | -1.57E-05    | 0 | -0.056908023 | 0 | 0            | 0 | 0            | 0.006451536 |
| 0 | 0            | 0 | 0            | 0 | 0            | 0 | 0            | 0.046197516 |
| 0 | -0.010934614 | 0 | 0            | 0 | -0.026193976 | 0 | 0            | 0           |
| 0 | -0.011116682 | 0 | 0            | 0 | -0.026163302 | 0 | 0            | 0.076063883 |
| 0 | 0            | 0 | 0.016301236  | 0 | -0.011515794 | 0 | -0.065787455 | 0           |
| 0 | -0.013327679 | 0 | 0            | 0 | -0.029571191 | 0 | 0            | 0.015187146 |
| 0 | 0            | 0 | 0            | 0 | -0.021914073 | 0 | 0            | 0.005985826 |
| 0 | 0            | 0 | -0.02072795  | 0 | 0.032661252  | 0 | -0.04640332  | 0           |
| 0 | 0            | 0 | -0.000578126 | 0 | 0.015882557  | 0 | -0.042743784 | 0           |
| 0 | 0.009819016  | 0 | 0.013074572  | 0 | 0            | 0 | 0            | 0           |
| 0 | 0.009718502  | 0 | 0.013114191  | 0 | 0            | 0 | 0            | 0.061717372 |
| 0 | 0.033611923  | 0 | -0.011577367 | 0 | 0.012717514  | 0 | -0.096643112 | 0           |
| 0 | 0            | 0 | 0.001479862  | 0 | 0.01446864   | 0 | 0            | 0           |
| 0 | 0            | 0 | 0.008789374  | 0 | 0            | 0 | 0            | 0.016054764 |
| 0 | 0.002880442  | 0 | 0            | 0 | 0            | 0 | 0            | 0.009717335 |
| 0 | 0            | 0 | -0.042155105 | 0 | 0            | 0 | 0            | 0.018428271 |
| 0 | 0.001215614  | 0 | -0.041989344 | 0 | 0            | 0 | 0            | 0           |
| 0 | 0.001068352  | 0 | -0.041945448 | 0 | 0            | 0 | 0            | 0.059641281 |
| 0 | 0.02955141   | 0 | -0.008043322 | 0 | -0.049200706 | 0 | 0            | 0           |
| 0 | 0.007142556  | 0 | 0.010566038  | 0 | 0            | 0 | 0            | 0.002091513 |
| 0 | 0.041099277  | 0 | 0.052007784  | 0 | -0.041498339 | 0 | 0            | 0           |
| 0 | 0.026459149  | 0 | 0            | 0 | 0            | 0 | 0            | 0.02015551  |
| 0 | -0.008079223 | 0 | -0.057809147 | 0 | 0            | 0 | 0            | 0.011945992 |
| 0 | -0.036055941 | 0 | -0.00566113  | 0 | -0.0569535   | 0 | 0            | 0           |
| 0 | -0.036270934 | 0 | 0            | 0 | -0.061796639 | 0 | 0            | 0.04414188  |
| 0 | -0.036412449 | 0 | -0.005579845 | 0 | -0.056962558 | 0 | 0            | 0.10430667  |
| 0 | -0.046136332 | 0 | -0.005748907 | 0 | -0.071175911 | 0 | 0            | 0.042545154 |
| 0 | 0.018695097  | 0 | 0            | 0 | 0            | 0 | 0            | 0.026008625 |
| 0 | 0            | 0 | -0.00494891  | 0 | -0.049028857 | 0 | 0            | 0.009946761 |
| 0 | -0.026814924 | 0 | -0.044689517 | 0 | 0            | 0 | 0            | 0.036390597 |
| 0 | 0.019017558  | 0 | 0            | 0 | 0            | 0 | 0            | 0.012186784 |
| 0 | 0.031300297  | 0 | 0            | 0 | 0            | 0 | -0.052062106 | 0.028789686 |
| 0 | 0.03154556   | 0 | 0            | 0 | 0            | 0 | -0.051922724 | 0           |
| 0 | 0.053179391  | 0 | 0.018928115  | 0 | 0            | 0 | -0.056215691 | 0           |
| 0 | 0.046863018  | 0 | 0            | 0 | 0            | 0 | -0.03564461  | 0           |
| 0 | 0            | 0 | 0            | 0 | -0.023062601 | 0 | -0.037356055 | 0.057971276 |
| 0 | 0            | 0 | 0            | 0 | -0.023351919 | 0 | -0.036887489 | 0           |
| 0 | 0.045920286  | 0 | 0            | 0 | 0            | 0 | -0.054986808 | 0           |
| 0 | 0.046171234  | 0 | 0            | 0 | -0.00343579  | 0 | -0.050001401 | 0           |

[illegible]



|   |              |   |              |   |              |   |              |   |             |
|---|--------------|---|--------------|---|--------------|---|--------------|---|-------------|
| 0 | 0.022725452  | 0 | -0.014650172 | 0 | 0            | 0 | -0.068594467 | 0 | 0.034482193 |
| 0 | 0.023091865  | 0 | -0.014727541 | 0 | 0            | 0 | -0.068486605 | 0 | 0           |
| 0 | 0            | 0 | 0            | 0 | -0.042594571 | 0 | 0            | 0 | 0           |
| 0 | 0            | 0 | 0            | 0 | 0            | 0 | 0            | 0 | 0.010902759 |
| 0 | 0            | 0 | -0.000304036 | 0 | 0            | 0 | 0            | 0 | 0           |
| 0 | 0            | 0 | 0            | 0 | -0.043228087 | 0 | 0            | 0 | 0.012020218 |
| 0 | 0            | 0 | 0            | 0 | -0.042536895 | 0 | 0            | 0 | 0.058336446 |
| 0 | 0            | 0 | -0.000261432 | 0 | 0            | 0 | 0            | 0 | 0.055995106 |
| 0 | 0.046025173  | 0 | 0            | 0 | 0.005160154  | 0 | 0            | 0 | 0           |
| 0 | 0.044158179  | 0 | -0.001997239 | 0 | 0            | 0 | 0            | 0 | 0           |
| 0 | 0.046705509  | 0 | -0.00577978  | 0 | 0.011007439  | 0 | 0            | 0 | 0           |
| 0 | 0.029286179  | 0 | 0            | 0 | 0            | 0 | -0.0752049   | 0 | 0.033118559 |
| 0 | 0.029736922  | 0 | 0            | 0 | 0            | 0 | -0.075147612 | 0 | 0           |
| 0 | 0.028849326  | 0 | 0            | 0 | 0            | 0 | -0.080067201 | 0 | 0.058657712 |
| 0 | 0            | 0 | 0            | 0 | -0.026790457 | 0 | 0            | 0 | 0           |
| 0 | 0            | 0 | -0.002387209 | 0 | -0.02461112  | 0 | 0            | 0 | 0           |
| 0 | 0            | 0 | 0            | 0 | -0.026937366 | 0 | 0            | 0 | 0.008063931 |
| 0 | 0            | 0 | 0            | 0 | -0.026786755 | 0 | 0            | 0 | 0.055061786 |
| 0 | 0            | 0 | -0.002356173 | 0 | -0.024635003 | 0 | 0            | 0 | 0.055724498 |
| 0 | 0            | 0 | -0.019112217 | 0 | 0            | 0 | -0.062776762 | 0 | 0.055558168 |
| 0 | 0.0411138    | 0 | -0.002501856 | 0 | -0.018307437 | 0 | -0.062259951 | 0 | 0           |
| 0 | 0.0410643    | 0 | 0            | 0 | -0.020880268 | 0 | -0.062760651 | 0 | 0           |
| 0 | 0            | 0 | -0.019395657 | 0 | 0            | 0 | -0.064085092 | 0 | 0.06745083  |
| 0 | 0            | 0 | -0.019352271 | 0 | 0            | 0 | -0.062486025 | 0 | 0           |
| 0 | 0            | 0 | -0.012961569 | 0 | 0            | 0 | 0            | 0 | 0           |
| 0 | 0            | 0 | -0.012944119 | 0 | 0            | 0 | 0            | 0 | 0.051980213 |
| 0 | 0            | 0 | -0.012903956 | 0 | 0            | 0 | 0            | 0 | 0.00492828  |
| 0 | 0.04252376   | 0 | -0.012161306 | 0 | 0            | 0 | -0.070357072 | 0 | 0           |
| 0 | 0            | 0 | 0            | 0 | 0            | 0 | 0            | 0 | 0.005664376 |
| 0 | 0.040036924  | 0 | 0            | 0 | -0.031121137 | 0 | 0            | 0 | 0           |
| 0 | 0            | 0 | 0            | 0 | 0            | 0 | -0.074926726 | 0 | 0.085373465 |
| 0 | 0.031597639  | 0 | 0            | 0 | 0            | 0 | 0            | 0 | 0           |
| 0 | 0.0316389    | 0 | 0            | 0 | 0            | 0 | 0            | 0 | 0.033516143 |
| 0 | 0            | 0 | 0.001930158  | 0 | -0.064238799 | 0 | 0            | 0 | 0           |
| 0 | 0            | 0 | 0            | 0 | -0.06253734  | 0 | 0            | 0 | 0.016811672 |
| 0 | 0.000181732  | 0 | 0            | 0 | -0.062530235 | 0 | 0            | 0 | 0           |
| 0 | 0            | 0 | 0.001973922  | 0 | -0.064202322 | 0 | 0            | 0 | 0.061873524 |
| 0 | 3.89E-05     | 0 | 0            | 0 | -0.062486864 | 0 | 0            | 0 | 0.06148993  |
| 0 | -0.003985213 | 0 | 0.001966778  | 0 | -0.071726984 | 0 | 0            | 0 | 0           |
| 0 | -0.004196276 | 0 | 0            | 0 | -0.070045452 | 0 | 0            | 0 | 0.015857657 |
| 0 | 0            | 0 | 0.002149777  | 0 | -0.071527057 | 0 | 0            | 0 | 0.012224967 |
| 0 | -0.004134784 | 0 | 0.002004183  | 0 | -0.071736805 | 0 | 0            | 0 | 0.06226636  |
| 0 | 0.036249899  | 0 | 0.013703066  | 0 | 0            | 0 | -0.049238436 | 0 | 0.026440318 |
| 0 | 0.036485852  | 0 | 0.013707991  | 0 | 0            | 0 | -0.049113034 | 0 | 0           |
| 0 | 0            | 0 | 0            | 0 | -0.026930802 | 0 | -0.044491075 | 0 | 0           |
| 0 | 0.030452041  | 0 | 0            | 0 | 0            | 0 | -0.034702625 | 0 | 0.028685094 |
| 0 | 0.030598433  | 0 | 0            | 0 | 0            | 0 | -0.034362611 | 0 | 0           |

|   |             |   |              |   |              |   |              |   |              |
|---|-------------|---|--------------|---|--------------|---|--------------|---|--------------|
| 0 | 0.024378377 | 0 | 0            | 0 | -0.011639149 | 0 | -0.038967236 | 0 | 0.034998355  |
| 0 | 0.024553501 | 0 | 0            | 0 | -0.011737759 | 0 | -0.038734735 | 0 | 0            |
| 0 | 0.030841172 | 0 | 0            | 0 | 0            | 0 | 0            | 0 | -0.01363696  |
| 0 | 0.03025903  | 0 | -0.001006807 | 0 | 0            | 0 | 0            | 0 | 0            |
| 0 | 0.030367167 | 0 | -0.000961658 | 0 | 0            | 0 | 0            | 0 | 0.029482471  |
| 0 | 0.052497501 | 0 | 0.019728519  | 0 | 0            | 0 | -0.035026429 | 0 | 0            |
| 0 | 0.05102585  | 0 | 0.029450119  | 0 | -0.020392543 | 0 | -0.039779645 | 0 | 0            |
| 0 | 0.029617301 | 0 | 0            | 0 | 0            | 0 | -0.048965454 | 0 | 0.028591634  |
| 0 | 0.029856375 | 0 | 0            | 0 | 0            | 0 | -0.048821682 | 0 | 0            |
| 0 | 0           | 0 | 0            | 0 | 0            | 0 | -0.038146673 | 0 | 0            |
| 0 | 0.051439389 | 0 | 0.005864651  | 0 | 0            | 0 | 0            | 0 | 0            |
| 0 | 0           | 0 | 0.023115067  | 0 | -0.037792824 | 0 | -0.02724322  | 0 | 0.061861378  |
| 0 | 0.029845809 | 0 | 0            | 0 | 0            | 0 | -0.046316436 | 0 | 0.028236083  |
| 0 | 0           | 0 | 0.023137359  | 0 | -0.038116996 | 0 | -0.0267394   | 0 | 0            |
| 0 | 0.043725318 | 0 | 0            | 0 | 0            | 0 | -0.035070685 | 0 | 0            |
| 0 | 0.05041984  | 0 | 0.017211945  | 0 | 0            | 0 | -0.053769766 | 0 | 0            |
| 0 | 0           | 0 | 0            | 0 | -0.023697653 | 0 | -0.035812142 | 0 | 0.055046023  |
| 0 | 0           | 0 | -0.010552553 | 0 | 0            | 0 | 0            | 0 | 0            |
| 0 | 0           | 0 | -0.010477868 | 0 | 0            | 0 | 0            | 0 | 0.060809444  |
| 0 | 0           | 0 | 0            | 0 | -0.023975769 | 0 | -0.035368027 | 0 | 0            |
| 0 | 0.021420354 | 0 | 0.036724715  | 0 | -0.05430201  | 0 | 0            | 0 | 0            |
| 0 | 0.048231214 | 0 | 0            | 0 | 0.00947517   | 0 | -0.033872669 | 0 | 0            |
| 0 | 0.02139314  | 0 | 0.036741861  | 0 | -0.054293465 | 0 | 0            | 0 | 0.044148632  |
| 0 | 0           | 0 | 0            | 0 | -0.024064575 | 0 | -0.034377147 | 0 | 0.05797426   |
| 0 | 0           | 0 | 0            | 0 | -0.022141616 | 0 | -0.032166033 | 0 | 0.043693966  |
| 0 | 0           | 0 | 0            | 0 | -0.02410234  | 0 | -0.033645735 | 0 | 0            |
| 0 | 0           | 0 | 0            | 0 | 0            | 0 | 0            | 0 | 0.023685406  |
| 0 | 0.043275963 | 0 | 0            | 0 | -0.005269067 | 0 | -0.047535675 | 0 | 0            |
| 0 | 0           | 0 | 0.007406335  | 0 | -0.028588453 | 0 | -0.035441386 | 0 | 0            |
| 0 | 0.037865987 | 0 | 0.013987999  | 0 | 0            | 0 | 0            | 0 | 0            |
| 0 | 0           | 0 | -0.016634035 | 0 | 0            | 0 | -0.037056128 | 0 | 0            |
| 0 | 0           | 0 | 0            | 0 | -0.020070568 | 0 | -0.033417303 | 0 | 0            |
| 0 | 0.038056573 | 0 | 0.014049419  | 0 | 0            | 0 | 0            | 0 | 0.022786503  |
| 0 | 0           | 0 | -0.008993264 | 0 | 0            | 0 | -0.057763846 | 0 | 0            |
| 0 | 0.031052497 | 0 | 0            | 0 | 0            | 0 | 0            | 0 | 0            |
| 0 | 0.031213988 | 0 | 0            | 0 | 0            | 0 | 0            | 0 | 0.024460664  |
| 0 | 0           | 0 | 0            | 0 | -0.021404219 | 0 | -0.037493446 | 0 | 0            |
| 0 | 0           | 0 | 0            | 0 | -0.021355965 | 0 | 0            | 0 | 0            |
| 0 | 0.049722135 | 0 | 0.017571738  | 0 | 0            | 0 | 0            | 0 | 0            |
| 0 | 0.027721657 | 0 | 0            | 0 | -0.007050891 | 0 | 0            | 0 | 0            |
| 0 | 0           | 0 | 0.032393457  | 0 | -0.060029703 | 0 | 0            | 0 | 0            |
| 0 | 0.027886417 | 0 | 0            | 0 | -0.006926794 | 0 | 0            | 0 | 0.030131477  |
| 0 | 0.031390141 | 0 | 0            | 0 | 0            | 0 | 0            | 0 | -0.019320414 |
| 0 | 0           | 0 | 0.032442553  | 0 | -0.059995079 | 0 | 0            | 0 | 0.061735874  |
| 0 | 0           | 0 | 0.02860031   | 0 | -0.05246268  | 0 | 0            | 0 | 0            |
| 0 | 0           | 0 | -0.008013116 | 0 | 0            | 0 | -0.034086661 | 0 | 0            |
| 0 | 0           | 0 | 0            | 0 | 0            | 0 | -0.037259983 | 0 | 0.054148249  |

|   |             |   |              |   |              |   |              |             |
|---|-------------|---|--------------|---|--------------|---|--------------|-------------|
| 0 | 0           | 0 | 0.030752006  | 0 | -0.056935076 | 0 | 0            | 0.018315704 |
| 0 | 0           | 0 | 0.028720957  | 0 | -0.052568356 | 0 | 0            | 0.062564367 |
| 0 | 0           | 0 | 0            | 0 | 0            | 0 | -0.036588041 | 0           |
| 0 | 0.050821589 | 0 | 0.024502616  | 0 | -0.013264836 | 0 | 0            | 0           |
| 0 | 0           | 0 | -0.012219934 | 0 | 0            | 0 | 0            | 0.01396093  |
| 0 | 0           | 0 | 0            | 0 | 0            | 0 | -0.03581687  | 0.04717257  |
| 0 | 0           | 0 | 0.000673325  | 0 | 0            | 0 | -0.036005085 | 0.057452379 |
| 0 | 0           | 0 | 0.000536517  | 0 | 0            | 0 | -0.035266513 | 0           |
| 0 | 0           | 0 | -0.007774087 | 0 | 0            | 0 | 0            | 0           |
| 0 | 0.029721805 | 0 | 0            | 0 | 0            | 0 | -0.036592974 | 0           |
| 0 | 0.029599505 | 0 | 0            | 0 | 0            | 0 | -0.036922947 | 0.026491469 |
| 0 | 0           | 0 | -0.000421175 | 0 | 0            | 0 | -0.049150815 | 0.056050717 |
| 0 | 0           | 0 | 0            | 0 | 0            | 0 | -0.04925423  | 0.058438763 |
| 0 | 0.045401215 | 0 | 0            | 0 | 0.006044075  | 0 | 0            | 0           |
| 0 | 0.025165213 | 0 | 0            | 0 | -0.009258659 | 0 | -0.035506651 | 0.033227088 |
| 0 | 0.027356459 | 0 | -0.005280613 | 0 | 0            | 0 | -0.035391103 | 0.030063398 |
| 0 | 0.027508952 | 0 | -0.005277193 | 0 | 0            | 0 | -0.035013364 | 0           |
| 0 | 0.025422258 | 0 | 0            | 0 | -0.009107264 | 0 | -0.035093847 | 0           |
| 0 | 0           | 0 | -0.000609351 | 0 | 0            | 0 | -0.048832211 | 0           |
| 0 | 0           | 0 | -0.000465133 | 0 | 0            | 0 | -0.046087201 | 0.058019803 |
| 0 | 0.029796559 | 0 | 0            | 0 | 0            | 0 | -0.035782219 | 0.015601525 |
| 0 | 0           | 0 | -0.013345661 | 0 | -0.009286435 | 0 | -0.033736172 | 0           |
| 0 | 0           | 0 | -0.010704198 | 0 | -0.029291331 | 0 | -0.054321225 | 0           |
| 0 | 0           | 0 | 0            | 0 | -0.025667362 | 0 | 0            | 0           |
| 0 | 0           | 0 | 0            | 0 | -0.025663745 | 0 | 0            | 0.054598418 |
| 0 | 0           | 0 | 0            | 0 | -0.026031014 | 0 | 0            | 0.012820321 |
| 0 | 0           | 0 | 0.005028063  | 0 | -0.026641634 | 0 | 0            | 0           |
| 0 | 0.014157923 | 0 | 0            | 0 | -0.029452577 | 0 | -0.048852517 | 0.044186297 |
| 0 | 0.012937147 | 0 | 0            | 0 | -0.035821886 | 0 | 0            | 0           |
| 0 | 0.012771047 | 0 | 0            | 0 | -0.03608614  | 0 | 0            | 0.001980076 |
| 0 | 0.014546697 | 0 | -0.001116505 | 0 | -0.027805003 | 0 | -0.048103237 | 0.044204431 |
| 0 | 0.014580415 | 0 | 0            | 0 | -0.028779869 | 0 | -0.048074628 | 0.043749595 |
| 0 | 0.014448971 | 0 | 0            | 0 | -0.029604066 | 0 | -0.048621678 | 0           |
| 0 | 0.012910548 | 0 | 0            | 0 | -0.035789437 | 0 | 0            | 0.045755105 |
| 0 | 0.014823494 | 0 | -0.001181771 | 0 | -0.027910095 | 0 | -0.047887149 | 0           |
| 0 | 0.044592758 | 0 | 0            | 0 | 0.004987781  | 0 | -0.036351896 | 0           |
| 0 | 0           | 0 | 0            | 0 | -0.026023145 | 0 | -0.036339614 | 0.055123855 |
| 0 | 0.042581739 | 0 | -0.002597712 | 0 | 0            | 0 | -0.035730372 | 0           |
| 0 | 0           | 0 | 0.021817524  | 0 | -0.061075842 | 0 | 0            | 0           |
| 0 | 0           | 0 | 0            | 0 | -0.026053705 | 0 | -0.035657305 | 0           |
| 0 | 0           | 0 | -0.01402927  | 0 | -0.010216492 | 0 | 0            | 0           |
| 0 | 0           | 0 | -0.002670319 | 0 | -0.023791823 | 0 | -0.035201866 | 0.056890256 |
| 0 | 0           | 0 | 0            | 0 | -0.026384658 | 0 | -0.035200401 | 0.044474481 |
| 0 | 0           | 0 | -0.002788024 | 0 | -0.023713481 | 0 | -0.034485318 | 0           |
| 0 | 0.046296494 | 0 | 0.03930027   | 0 | -0.050611594 | 0 | 0            | 0           |
| 0 | 0.046013899 | 0 | -0.006540757 | 0 | 0.011816391  | 0 | -0.034535458 | 0           |
| 0 | 0           | 0 | 0            | 0 | -0.040118346 | 0 | 0            | 0.01389543  |

|   |             |   |              |   |              |   |              |   |              |
|---|-------------|---|--------------|---|--------------|---|--------------|---|--------------|
| 0 | 0           | 0 | -0.001494076 | 0 | -0.033476499 | 0 | -0.044736193 | 0 | 0.056638315  |
| 0 | 0           | 0 | 0            | 0 | -0.034814731 | 0 | -0.044657784 | 0 | 0.053290533  |
| 0 | 0           | 0 | -0.001502493 | 0 | -0.032514345 | 0 | -0.043001974 | 0 | 0.053036252  |
| 0 | 0           | 0 | -0.001577406 | 0 | -0.033737676 | 0 | -0.044328916 | 0 | 0            |
| 0 | 0           | 0 | -0.012873834 | 0 | 0            | 0 | -0.036615301 | 0 | 0.05208664   |
| 0 | 0           | 0 | -0.012950234 | 0 | 0            | 0 | -0.035963535 | 0 | 0            |
| 0 | 0           | 0 | -0.000937159 | 0 | 0            | 0 | 0            | 0 | 0            |
| 0 | 0           | 0 | 0            | 0 | 0            | 0 | 0            | 0 | 0.008744203  |
| 0 | 0           | 0 | -0.012839718 | 0 | 0            | 0 | -0.035406981 | 0 | 0.042237451  |
| 0 | 0           | 0 | -0.000899299 | 0 | 0            | 0 | 0            | 0 | 0.05349116   |
| 0 | 0           | 0 | -0.001236897 | 0 | 0            | 0 | 0            | 0 | 0.012197793  |
| 0 | 0.027191603 | 0 | -0.007045563 | 0 | 0            | 0 | 0            | 0 | 0            |
| 0 | 0.024791931 | 0 | 0            | 0 | -0.011400816 | 0 | 0            | 0 | 0            |
| 0 | 0.027355092 | 0 | -0.007008979 | 0 | 0            | 0 | 0            | 0 | 0.026957556  |
| 0 | 0.0249832   | 0 | -0.004618393 | 0 | -0.006972849 | 0 | 0            | 0 | 0            |
| 0 | 0.024969743 | 0 | 0            | 0 | -0.011268718 | 0 | 0            | 0 | 0.030734121  |
| 0 | 0.027543821 | 0 | -0.006909397 | 0 | 0            | 0 | 0            | 0 | -0.018787528 |
| 0 | 0.0210519   | 0 | -0.015381594 | 0 | 0            | 0 | -0.061350897 | 0 | 0.036219091  |
| 0 | 0.025150768 | 0 | -0.004635182 | 0 | -0.006830941 | 0 | 0            | 0 | 0.031237563  |
| 0 | 0.020834571 | 0 | -0.015643736 | 0 | 0            | 0 | -0.062370038 | 0 | 0.048446596  |
| 0 | 0.025013772 | 0 | 0            | 0 | -0.011449828 | 0 | 0            | 0 | -0.014581995 |
| 0 | 0.021403799 | 0 | -0.01546283  | 0 | 0            | 0 | -0.061219391 | 0 | 0            |
| 0 | 0.030632364 | 0 | 0            | 0 | 0            | 0 | 0            | 0 | -0.022870595 |
| 0 | 0           | 0 | 0            | 0 | 0            | 0 | -0.038054392 | 0 | 0.043719519  |
| 0 | 0.033801096 | 0 | -0.003150219 | 0 | -0.05655466  | 0 | 0            | 0 | 0            |
| 0 | 0.030869777 | 0 | 0.017703182  | 0 | 0            | 0 | -0.052818105 | 0 | 0.033549009  |
| 0 | 0.031160942 | 0 | 0.017710123  | 0 | 0            | 0 | -0.052654045 | 0 | 0            |
| 0 | 0.023047989 | 0 | 0            | 0 | 0            | 0 | -0.037912799 | 0 | 0.037015223  |
| 0 | 0.023253167 | 0 | 0            | 0 | 0            | 0 | -0.037444161 | 0 | 0            |
| 0 | 0           | 0 | 0.024665783  | 0 | -0.030498568 | 0 | -0.034916004 | 0 | 0.06353379   |
| 0 | 0           | 0 | 0.024680256  | 0 | -0.030823442 | 0 | -0.034399957 | 0 | 0            |
| 0 | 0.043398664 | 0 | -0.007873272 | 0 | 0.009585238  | 0 | 0            | 0 | 0            |
| 0 | 0           | 0 | -0.004293807 | 0 | -0.024065163 | 0 | 0            | 0 | 0            |
| 0 | 0.022288651 | 0 | 0            | 0 | 0            | 0 | -0.05217826  | 0 | 0.036465133  |
| 0 | 0.022582315 | 0 | 0            | 0 | 0            | 0 | -0.051993351 | 0 | 0            |
| 0 | 0           | 0 | -0.004258804 | 0 | -0.024095888 | 0 | 0            | 0 | 0.053869157  |
| 0 | 0           | 0 | 0            | 0 | -0.028258657 | 0 | 0            | 0 | 0.008733602  |
| 0 | 0           | 0 | -0.020037608 | 0 | 0            | 0 | -0.058225572 | 0 | 0.064363292  |
| 0 | 0           | 0 | -0.004019932 | 0 | -0.024546916 | 0 | 0            | 0 | 0.010160698  |
| 0 | 0.027662043 | 0 | 0            | 0 | 0            | 0 | -0.071181409 | 0 | 0.056190247  |
| 0 | 0.020138866 | 0 | 0            | 0 | -0.004979194 | 0 | -0.045831119 | 0 | 0.04037163   |
| 0 | 0.02037484  | 0 | 0            | 0 | -0.005082478 | 0 | -0.045567456 | 0 | 0            |
| 0 | 0.022526912 | 0 | 0            | 0 | 0            | 0 | -0.048974991 | 0 | 0.034881481  |
| 0 | 0.0512904   | 0 | 0.025016608  | 0 | 0            | 0 | -0.038319177 | 0 | 0            |
| 0 | 0.039178999 | 0 | -0.004692627 | 0 | -0.01728666  | 0 | -0.058401862 | 0 | 0            |
| 0 | 0           | 0 | -0.01458498  | 0 | 0            | 0 | 0            | 0 | 0.004794172  |
| 0 | 0           | 0 | 0            | 0 | -0.015368544 | 0 | -0.043658477 | 0 | 0.056478793  |

|   |             |   |              |   |              |   |              |   |              |
|---|-------------|---|--------------|---|--------------|---|--------------|---|--------------|
| 0 | 0.048857499 | 0 | 0.022234832  | 0 | 0            | 0 | -0.058397373 | 0 | 0            |
| 0 | 0           | 0 | 0            | 0 | -0.015650904 | 0 | -0.043207445 | 0 | 0            |
| 0 | 0.050116432 | 0 | 0.030069629  | 0 | -0.012502144 | 0 | -0.047584431 | 0 | 0            |
| 0 | 0           | 0 | 0            | 0 | 0            | 0 | -0.040230427 | 0 | 0.055167493  |
| 0 | 0           | 0 | 0            | 0 | 0            | 0 | -0.039550161 | 0 | 0            |
| 0 | 0           | 0 | 0            | 0 | -0.011659746 | 0 | -0.038052015 | 0 | 0.058982756  |
| 0 | 0           | 0 | 0            | 0 | -0.013785157 | 0 | -0.040149544 | 0 | 0.048488117  |
| 0 | 0           | 0 | 0            | 0 | -0.011696735 | 0 | -0.037308273 | 0 | 0            |
| 0 | 0           | 0 | 0.006701025  | 0 | 0            | 0 | -0.039457663 | 0 | 0.059812039  |
| 0 | 0.048286    | 0 | 0            | 0 | 0.02233722   | 0 | -0.037600183 | 0 | 0            |
| 0 | 0.040372089 | 0 | 0            | 0 | 0            | 0 | -0.038174413 | 0 | 0            |
| 0 | 0           | 0 | 0.006569459  | 0 | 0            | 0 | -0.038692243 | 0 | 0            |
| 0 | 0           | 0 | 0            | 0 | 0            | 0 | -0.038661071 | 0 | 0.046626408  |
| 0 | 0           | 0 | 0.005469154  | 0 | 0            | 0 | -0.053571762 | 0 | 0.058155379  |
| 0 | 0           | 0 | 0.005276022  | 0 | 0            | 0 | -0.05324149  | 0 | 0            |
| 0 | 0           | 0 | 0            | 0 | 0            | 0 | -0.052396383 | 0 | 0.057849473  |
| 0 | 0.032422767 | 0 | 0.017849445  | 0 | 0            | 0 | 0            | 0 | 0            |
| 0 | 0.03258     | 0 | 0.017907785  | 0 | 0            | 0 | 0            | 0 | 0.029857204  |
| 0 | 0           | 0 | 0.005453904  | 0 | 0            | 0 | -0.050109225 | 0 | 0.060193572  |
| 0 | 0.023728834 | 0 | 0            | 0 | 0            | 0 | 0            | 0 | 0            |
| 0 | 0.030742413 | 0 | 0.001300016  | 0 | 0            | 0 | 0            | 0 | 0            |
| 0 | 0.03018278  | 0 | 0            | 0 | 0            | 0 | 0            | 0 | -0.005991832 |
| 0 | 0.030787101 | 0 | 0.001334139  | 0 | 0            | 0 | 0            | 0 | 0.033314506  |
| 0 | 0.023853661 | 0 | 0            | 0 | 0            | 0 | 0            | 0 | 0.03233898   |
| 0 | 0.042120325 | 0 | 0            | 0 | 0.002737594  | 0 | -0.055474703 | 0 | 0            |
| 0 | 0.025996577 | 0 | 0            | 0 | 0.004181052  | 0 | 0            | 0 | 0            |
| 0 | 0.010240846 | 0 | -0.04211453  | 0 | 0            | 0 | 0            | 0 | 0            |
| 0 | 0.015542922 | 0 | 0.038659162  | 0 | -0.05268205  | 0 | 0            | 0 | 0            |
| 0 | 0.024017806 | 0 | 0            | 0 | 0            | 0 | 0            | 0 | -0.015139588 |
| 0 | 0.048065495 | 0 | 0.022589213  | 0 | 0            | 0 | 0            | 0 | 0            |
| 0 | 0.010151157 | 0 | -0.042076991 | 0 | 0            | 0 | 0            | 0 | 0.050771809  |
| 0 | 0.026176091 | 0 | 0            | 0 | 0.004316316  | 0 | 0            | 0 | 0.032682618  |
| 0 | 0.015479339 | 0 | 0.03867709   | 0 | -0.052678339 | 0 | 0            | 0 | 0.051422038  |
| 0 | 0           | 0 | 0.026498688  | 0 | -0.038222764 | 0 | 0            | 0 | 0            |
| 0 | 0           | 0 | 0.026607474  | 0 | -0.038315775 | 0 | 0            | 0 | 0.063050055  |
| 0 | 0           | 0 | -0.04376258  | 0 | 0            | 0 | 0            | 0 | 0.019164061  |
| 0 | 0.022037552 | 0 | 0            | 0 | 0            | 0 | -0.040367974 | 0 | 0.034630335  |
| 0 | 0.022218175 | 0 | 0            | 0 | 0            | 0 | -0.039936314 | 0 | 0            |
| 0 | 0           | 0 | 0.035544527  | 0 | -0.05700978  | 0 | 0            | 0 | 0            |
| 0 | 0           | 0 | 0.035591926  | 0 | -0.056971459 | 0 | 0            | 0 | 0.064084792  |
| 0 | 0           | 0 | 0.034327495  | 0 | -0.054675876 | 0 | 0            | 0 | 0.019575359  |
| 0 | 0.050418646 | 0 | 0.021975943  | 0 | 0.001507826  | 0 | 0            | 0 | 0            |
| 0 | 0.020766722 | 0 | -0.003148081 | 0 | 0            | 0 | -0.038925331 | 0 | 0.03796718   |
| 0 | 0.020982672 | 0 | -0.003138608 | 0 | 0            | 0 | -0.03844476  | 0 | 0            |
| 0 | 0.023324762 | 0 | 0            | 0 | 0.002194455  | 0 | -0.039363571 | 0 | 0.036000946  |
| 0 | 0.022237362 | 0 | 0            | 0 | 0            | 0 | -0.03905253  | 0 | 0.020279012  |
| 0 | 0.023608711 | 0 | 0            | 0 | 0.002377331  | 0 | -0.038924979 | 0 | 0            |

|   |              |   |              |   |              |              |              |             |
|---|--------------|---|--------------|---|--------------|--------------|--------------|-------------|
| 0 | 0.029204946  | 0 | -0.00079134  | 0 | 0            | 0            | 0            | -0.01037241 |
| 0 | 0.045060413  | 0 | 0            | 0 | 0.01840724   | 0            | 0            | 0           |
| 0 | -0.000436345 | 0 | 0            | 0 | -0.060334555 | 0            | 0            | 0.018378353 |
| 0 | 0            | 0 | -0.000139858 | 0 | -0.060122134 | 0            | 0            | 0.017961085 |
| 0 | -0.000292664 | 0 | -0.000182754 | 0 | -0.060180583 | 0            | 0            | 0           |
| 0 | 0            | 0 | 0            | 0 | -0.013443173 | 0            | 0            | 0           |
| 0 | 0.02385556   | 0 | 0.028602304  | 0 | 0            | -0.047298171 | 0            | 0.043767815 |
| 0 | 0.024126339  | 0 | 0.028643646  | 0 | 0            | -0.046754496 | 0            | 0           |
| 0 | -0.000447585 | 0 | -0.000142775 | 0 | -0.060173805 | 0            | 0            | 0.06087993  |
| 0 | 0            | 0 | 0            | 0 | -0.013436658 | 0            | 0            | 0.055122372 |
| 0 | 0            | 0 | 0            | 0 | -0.013803281 | 0            | 0            | 0.009427274 |
| 0 | 0            | 0 | 0.004930402  | 0 | 0            | 0            | 0            | 0           |
| 0 | -0.003614193 | 0 | -0.00011079  | 0 | -0.065899365 | 0            | 0            | 0.017654642 |
| 0 | 0            | 0 | 0.004966915  | 0 | 0            | 0            | 0            | 0.055401611 |
| 0 | 0            | 0 | 0            | 0 | 0            | 0            | 0            | 0.005135185 |
| 0 | 0            | 0 | -0.009025443 | 0 | 0            | -0.04014658  | 0            | 0.053752371 |
| 0 | 0            | 0 | 0            | 0 | -0.01349002  | 0            | -0.040311483 | 0.055717371 |
| 0 | 0            | 0 | -0.009104344 | 0 | 0            | -0.039475419 | 0            | 0           |
| 0 | 0            | 0 | 0            | 0 | -0.013519058 | 0            | -0.039616398 | 0           |
| 0 | 0.018607851  | 0 | 0.033032345  | 0 | -0.011934298 | 0            | -0.057088436 | 0.050543424 |
| 0 | 0            | 0 | 0.004619154  | 0 | 0            | 0            | 0            | 0.0120431   |
| 0 | 0.021422817  | 0 | 0.026036957  | 0 | 0            | -0.066278133 | 0            | 0.044442684 |
| 0 | 0            | 0 | -0.005136152 | 0 | -0.008909975 | 0            | -0.038869687 | 0.057418922 |
| 0 | 0.018935282  | 0 | 0.033112553  | 0 | -0.012043073 | 0            | -0.056818515 | 0           |
| 0 | 0            | 0 | -0.005252262 | 0 | -0.008834781 | 0            | -0.038138923 | 0           |
| 0 | 0.021798356  | 0 | 0.026074276  | 0 | 0            | -0.066091769 | 0            | 0           |
| 0 | 0            | 0 | 0            | 0 | -0.01386829  | 0            | -0.03901231  | 0.045226469 |
| 0 | 0            | 0 | -0.008971881 | 0 | 0            | -0.038823737 | 0            | 0.042941597 |
| 0 | 0.044236154  | 0 | 0            | 0 | 0.017674103  | 0            | -0.040406    | 0           |
| 0 | 0            | 0 | 0.017919371  | 0 | 0            | -0.047995295 | 0            | 0.059972834 |
| 0 | 0            | 0 | 0            | 0 | 0            | -0.041101026 | 0            | 0.042834928 |
| 0 | 0            | 0 | 0.017798443  | 0 | 0            | -0.047247889 | 0            | 0           |
| 0 | 0.021683734  | 0 | 0.026197227  | 0 | 0            | -0.062830762 | 0            | 0.04817985  |
| 0 | 0            | 0 | 0.011686525  | 0 | -0.034513874 | 0            | -0.038261741 | 0           |
| 0 | 0            | 0 | 0.030966649  | 0 | -0.021238001 | 0            | -0.055504027 | 0.064281448 |
| 0 | 0            | 0 | 0            | 0 | -0.020524578 | 0            | -0.034557075 | 0           |
| 0 | 0            | 0 | 0.030986017  | 0 | -0.021535439 | 0            | -0.055046426 | 0           |
| 0 | 0            | 0 | -0.010269336 | 0 | 0            | 0            | 0            | 0.020901098 |
| 0 | 0.025396766  | 0 | 0            | 0 | 0.028662845  | 0            | -0.04597483  | 0.036409806 |
| 0 | 0.02566277   | 0 | 0            | 0 | 0.028819216  | 0            | -0.045524019 | 0           |
| 0 | 0.045681645  | 0 | -0.00925244  | 0 | 0.027089525  | 0            | -0.038234941 | 0           |
| 0 | 0            | 0 | 0.025040561  | 0 | -0.011549996 | 0            | -0.046875506 | 0.065773589 |
| 0 | 0            | 0 | 0.024721893  | 0 | -0.011294863 | 0            | -0.045986701 | 0           |
| 0 | 0.009088416  | 0 | -0.002924736 | 0 | -0.021190963 | 0            | -0.056029667 | 0.0504501   |
| 0 | 0.008803483  | 0 | 0            | 0 | -0.024323096 | 0            | -0.056635147 | 0.050738552 |
| 0 | 0.040072499  | 0 | 0.000303476  | 0 | 0            | -0.039262994 | 0            | 0           |
| 0 | 0.009175291  | 0 | 0            | 0 | -0.023712095 | 0            | -0.055997144 | 0.053714265 |

|   |             |   |              |   |              |   |              |   |              |
|---|-------------|---|--------------|---|--------------|---|--------------|---|--------------|
| 0 | 0           | 0 | 0.02880612   | 0 | -0.018050976 | 0 | -0.051761236 | 0 | 0.059341138  |
| 0 | 0.009430656 | 0 | -0.003001605 | 0 | -0.02129801  | 0 | -0.055792563 | 0 | 0            |
| 0 | 0           | 0 | 0.017558499  | 0 | 0            | 0 | -0.046282778 | 0 | 0.051430506  |
| 0 | 0.009160597 | 0 | 0            | 0 | -0.024485418 | 0 | -0.056383162 | 0 | 0            |
| 0 | 0           | 0 | -0.00313309  | 0 | -0.024952297 | 0 | -0.054075677 | 0 | 0.058071631  |
| 0 | 0           | 0 | 0            | 0 | -0.027698683 | 0 | -0.053995985 | 0 | 0.059664338  |
| 0 | 0           | 0 | -0.003137942 | 0 | -0.02420284  | 0 | -0.052806957 | 0 | 0.059094429  |
| 0 | 0           | 0 | -0.003227469 | 0 | -0.025212217 | 0 | -0.053662665 | 0 | 0            |
| 0 | 0           | 0 | 0            | 0 | 0.01108352   | 0 | -0.047238432 | 0 | 0.056773315  |
| 0 | 0           | 0 | -0.006752841 | 0 | 0            | 0 | -0.035330286 | 0 | 0            |
| 0 | 0           | 0 | 0            | 0 | 0.011055807  | 0 | -0.046541313 | 0 | 0            |
| 0 | 0.04582992  | 0 | 0            | 0 | 0.044162987  | 0 | -0.047525309 | 0 | 0            |
| 0 | 0           | 0 | 0.016335535  | 0 | 0            | 0 | -0.063559779 | 0 | 0.065650513  |
| 0 | 0.008189838 | 0 | 0            | 0 | 0            | 0 | -0.047632464 | 0 | 0.050014273  |
| 0 | 0.008457852 | 0 | 0            | 0 | 0            | 0 | -0.047019818 | 0 | 0            |
| 0 | 0.046287785 | 0 | 0.037025617  | 0 | 0            | 0 | -0.049390808 | 0 | 0            |
| 0 | 0.006879326 | 0 | 0            | 0 | -0.032791929 | 0 | 0            | 0 | 0            |
| 0 | 0.006455661 | 0 | 0            | 0 | -0.033463134 | 0 | 0            | 0 | 0.005796138  |
| 0 | 0.00682066  | 0 | 0            | 0 | -0.032755061 | 0 | 0            | 0 | 0.0531075    |
| 0 | 0           | 0 | 0            | 0 | 0            | 0 | -0.047237043 | 0 | 0.040778431  |
| 0 | 0           | 0 | 0            | 0 | -0.035106526 | 0 | 0            | 0 | 0.012309576  |
| 0 | 0.0141565   | 0 | -0.01384189  | 0 | 0            | 0 | -0.066216279 | 0 | 0.044182767  |
| 0 | 0.014022626 | 0 | -0.014000477 | 0 | 0            | 0 | -0.066908607 | 0 | 0.056803242  |
| 0 | 0.051800606 | 0 | 0.019753737  | 0 | 0.030633304  | 0 | -0.046376705 | 0 | 0            |
| 0 | 0.014562698 | 0 | -0.013942747 | 0 | 0            | 0 | -0.066051597 | 0 | 0            |
| 0 | 0.020565892 | 0 | -0.005131877 | 0 | 0            | 0 | 0            | 0 | 0            |
| 0 | 0           | 0 | 0            | 0 | 0.010834739  | 0 | -0.045553145 | 0 | 0.045841833  |
| 0 | 0.020695358 | 0 | -0.005099749 | 0 | 0            | 0 | 0            | 0 | 0.034506331  |
| 0 | 0.02312299  | 0 | -0.007244473 | 0 | 0.006778935  | 0 | 0            | 0 | 0            |
| 0 | 0.023092885 | 0 | 0            | 0 | 0            | 0 | 0            | 0 | -0.019070631 |
| 0 | 0.022824346 | 0 | 0            | 0 | -0.000220338 | 0 | 0            | 0 | 0            |
| 0 | 0.020893563 | 0 | -0.00497742  | 0 | 0            | 0 | 0            | 0 | -0.015052683 |
| 0 | 0.008264333 | 0 | 0            | 0 | 0            | 0 | -0.045929825 | 0 | 0.036270486  |
| 0 | 0.023311436 | 0 | -0.007271068 | 0 | 0.006944977  | 0 | 0            | 0 | 0.033399326  |
| 0 | 0.023024085 | 0 | 0            | 0 | -7.00E-05    | 0 | 0            | 0 | 0.033152506  |
| 0 | 0.023068148 | 0 | 0            | 0 | -0.000259498 | 0 | 0            | 0 | -0.016218377 |
| 0 | 0.011221829 | 0 | 0            | 0 | 0.006713288  | 0 | -0.06532895  | 0 | 0.049758783  |
| 0 | 0.011578679 | 0 | 0            | 0 | 0.00667982   | 0 | -0.065094226 | 0 | 0            |
| 0 | 0.007398421 | 0 | 0            | 0 | 0            | 0 | -0.061907996 | 0 | 0.05048873   |
| 0 | 0           | 0 | -0.017005896 | 0 | 0            | 0 | -0.064082029 | 0 | 0.067487905  |
| 0 | 0.01227168  | 0 | 0            | 0 | 0.008284372  | 0 | -0.06305991  | 0 | 0.050804765  |
| 0 | 0           | 0 | 0            | 0 | 0.001080909  | 0 | -0.06191246  | 0 | 0.058661169  |
| 0 | 0           | 0 | 0.007814501  | 0 | -0.029759425 | 0 | 0            | 0 | 0            |
| 0 | 0.020120809 | 0 | 0            | 0 | 0            | 0 | -0.075105672 | 0 | 0.06385553   |
| 0 | 0.044716545 | 0 | 0.041287826  | 0 | -0.047382907 | 0 | 0            | 0 | 0            |
| 0 | 0           | 0 | -0.014526893 | 0 | -0.009063922 | 0 | -0.034556088 | 0 | 0            |
| 0 | 0           | 0 | -0.006979577 | 0 | -0.009154852 | 0 | 0            | 0 | 0            |

|   |              |   |              |   |              |   |              |   |              |
|---|--------------|---|--------------|---|--------------|---|--------------|---|--------------|
| 0 | 0            | 0 | 0.005484383  | 0 | -0.026581883 | 0 | -0.031102959 | 0 | 0            |
| 0 | 0            | 0 | -0.006953737 | 0 | -0.009173172 | 0 | 0            | 0 | 0.053879045  |
| 0 | 0            | 0 | -0.010914481 | 0 | 0            | 0 | 0            | 0 | 0.001884932  |
| 0 | 0            | 0 | 0            | 0 | -0.015911119 | 0 | 0            | 0 | 0.004667087  |
| 0 | 0            | 0 | -0.006667538 | 0 | -0.009678558 | 0 | 0            | 0 | 0.00598755   |
| 0 | 0.042657293  | 0 | -0.01076337  | 0 | 0.024524361  | 0 | 0            | 0 | 0            |
| 0 | 0.022517645  | 0 | 0.027561734  | 0 | 0            | 0 | 0            | 0 | 0            |
| 0 | 0.022653246  | 0 | 0.027652845  | 0 | 0            | 0 | 0            | 0 | 0.040264662  |
| 0 | 0.046339099  | 0 | 0.035378194  | 0 | -0.001505567 | 0 | -0.071367772 | 0 | 0            |
| 0 | 0.025190681  | 0 | 0.023113754  | 0 | 0.008404968  | 0 | 0            | 0 | 0            |
| 0 | 0.022601962  | 0 | 0.027306202  | 0 | 0            | 0 | 0            | 0 | -0.015797449 |
| 0 | 0.025390379  | 0 | 0.023092102  | 0 | 0.008626315  | 0 | 0            | 0 | 0.039795227  |
| 0 | 0.022085448  | 0 | 0            | 0 | 0.025235802  | 0 | -0.048853756 | 0 | 0.035801278  |
| 0 | 0.022335654  | 0 | 0            | 0 | 0.02537969   | 0 | -0.048414569 | 0 | 0            |
| 0 | 0.024753148  | 0 | 0            | 0 | 0.028963589  | 0 | 0            | 0 | 0            |
| 0 | 0.02244151   | 0 | -0.00922862  | 0 | 0.033793087  | 0 | -0.046912005 | 0 | 0.036896549  |
| 0 | 0.022702819  | 0 | -0.0092952   | 0 | 0.034005978  | 0 | -0.046449506 | 0 | 0            |
| 0 | 0.025081722  | 0 | 0            | 0 | 0.02925215   | 0 | 0            | 0 | 0.032321822  |
| 0 | 0.022070975  | 0 | 0            | 0 | 0.025051717  | 0 | -0.047394519 | 0 | 0.022437555  |
| 0 | -0.000178044 | 0 | -0.059502695 | 0 | 0            | 0 | 0            | 0 | 0.004299704  |
| 0 | 0            | 0 | 0.022801492  | 0 | -0.00880072  | 0 | 0            | 0 | 0            |
| 0 | 0.025035736  | 0 | 0            | 0 | 0.028945409  | 0 | 0            | 0 | -0.024957013 |
| 0 | 0            | 0 | 0.022853961  | 0 | -0.008773605 | 0 | 0            | 0 | 0.060874066  |
| 0 | 0            | 0 | 0.017121461  | 0 | 0            | 0 | 0            | 0 | 0.000755003  |
| 0 | 0            | 0 | -0.009015205 | 0 | 0.01806328   | 0 | -0.047937924 | 0 | 0.055176401  |
| 0 | 0.0372551    | 0 | -0.007124682 | 0 | -0.008729282 | 0 | -0.067729052 | 0 | 0            |
| 0 | 0            | 0 | -0.009123917 | 0 | 0.018122963  | 0 | -0.047244923 | 0 | 0            |
| 0 | 0            | 0 | 0.022520141  | 0 | -0.008747451 | 0 | 0            | 0 | 0.006469058  |
| 0 | 0.047822545  | 0 | 0.018520745  | 0 | 0.029683003  | 0 | 0            | 0 | 0            |
| 0 | 0            | 0 | 0            | 0 | 0.009773832  | 0 | -0.048389245 | 0 | 0.04146034   |
| 0 | 0.008437903  | 0 | 0.002688657  | 0 | 0            | 0 | -0.049102387 | 0 | 0.050292414  |
| 0 | 0.008723381  | 0 | 0.002712795  | 0 | 0            | 0 | -0.048488484 | 0 | 0            |
| 0 | 0.007097562  | 0 | 0            | 0 | 0            | 0 | -0.048661719 | 0 | 0.029945301  |
| 0 | 0            | 0 | -0.008616536 | 0 | 0.017522077  | 0 | -0.046488963 | 0 | 0.042530511  |
| 0 | 0.043117077  | 0 | -0.013104697 | 0 | 0.052910894  | 0 | -0.047999819 | 0 | 0            |
| 0 | 0            | 0 | -0.000112252 | 0 | 0            | 0 | -0.048533384 | 0 | 0.040789979  |
| 0 | 0.024899557  | 0 | 0.004245644  | 0 | 0            | 0 | 0            | 0 | 0            |
| 0 | 0.024905406  | 0 | 0.004274465  | 0 | 0            | 0 | 0            | 0 | 0.040704933  |
| 0 | 0.022904045  | 0 | 0            | 0 | 0            | 0 | 0            | 0 | -0.001506264 |
| 0 | 0            | 0 | 0            | 0 | 0.011579789  | 0 | 0            | 0 | -0.003778166 |
| 0 | 0.00862917   | 0 | 0.002875703  | 0 | 0            | 0 | -0.047681757 | 0 | 0.036079163  |
| 0 | 0.007657357  | 0 | 0            | 0 | 0            | 0 | 0            | 0 | -0.013033632 |
| 0 | 0.0233885    | 0 | 0.002087321  | 0 | 0            | 0 | 0            | 0 | -0.006408081 |
| 0 | 0            | 0 | 0            | 0 | -0.008079541 | 0 | -0.038373562 | 0 | 0            |
| 0 | 0            | 0 | -0.00093409  | 0 | 0            | 0 | -0.038837569 | 0 | 0            |
| 0 | 0            | 0 | -0.005261516 | 0 | 0            | 0 | 0            | 0 | 0.019778816  |
| 0 | 0            | 0 | 0.012791216  | 0 | -0.026955762 | 0 | -0.046022917 | 0 | 0            |



|   |              |   |              |   |              |   |              |              |
|---|--------------|---|--------------|---|--------------|---|--------------|--------------|
| 0 | 0.009034359  | 0 | -0.041509525 | 0 | 0            | 0 | 0            | 0.011723341  |
| 0 | 0.021676433  | 0 | -0.011851767 | 0 | 0.036304418  | 0 | 0            | 0            |
| 0 | 0.022013475  | 0 | -0.011906234 | 0 | 0.036649985  | 0 | 0            | 0.033101466  |
| 0 | 0.022049046  | 0 | -0.011571884 | 0 | 0.036162721  | 0 | 0            | -0.026932723 |
| 0 | 0.021569395  | 0 | 0            | 0 | 0.025342724  | 0 | 0            | -0.027412983 |
| 0 | -0.008358886 | 0 | 0            | 0 | -0.059925107 | 0 | 0            | 0.026294457  |
| 0 | -0.008214657 | 0 | -0.002057893 | 0 | -0.058180199 | 0 | 0            | 0            |
| 0 | -0.008417443 | 0 | -0.002004042 | 0 | -0.058181973 | 0 | 0            | 0.069992246  |
| 0 | -0.002397322 | 0 | -0.005518847 | 0 | -0.007369513 | 0 | -0.078338153 | 0.076458203  |
| 0 | -0.002331098 | 0 | -0.005518463 | 0 | -0.007297878 | 0 | -0.078056703 | 0.064325979  |
| 0 | 0            | 0 | -0.005481705 | 0 | -0.006237749 | 0 | -0.07904917  | 0.07503119   |
| 0 | 0            | 0 | -0.001755656 | 0 | -0.056633071 | 0 | 0            | 0.016681849  |
| 0 | -0.002203289 | 0 | 0            | 0 | -0.011949635 | 0 | -0.078156515 | 0.077452378  |
| 0 | -0.000155221 | 0 | -0.00923337  | 0 | 0            | 0 | -0.080986266 | 0.076959806  |
| 0 | -0.001864476 | 0 | -0.005645705 | 0 | -0.007304063 | 0 | -0.077872635 | 0            |
| 0 | 0            | 0 | -0.017050636 | 0 | 0.005803357  | 0 | -0.038341204 | 0            |
| 0 | 0            | 0 | 0.04714153   | 0 | -0.052303768 | 0 | 0            | 0.017012107  |
| 0 | -5.95E-05    | 0 | 0.04708507   | 0 | -0.052297153 | 0 | 0            | 0            |
| 0 | 0            | 0 | -0.011294637 | 0 | 0.020614659  | 0 | 0            | -0.007669179 |
| 0 | -0.000684227 | 0 | 0.047633036  | 0 | -0.053558479 | 0 | 0            | 0.014017865  |
| 0 | -0.000218667 | 0 | 0.047103541  | 0 | -0.052275017 | 0 | 0            | 0.072348066  |
| 0 | 0            | 0 | 0.00327483   | 0 | -0.011965947 | 0 | -0.034678057 | 0            |
| 0 | 0            | 0 | 0.005668031  | 0 | -0.01550467  | 0 | 0            | 0            |
| 0 | -0.012195631 | 0 | -0.001981036 | 0 | -0.065004882 | 0 | 0            | 0.023267266  |
| 0 | 0.007073322  | 0 | 0.00119161   | 0 | 0            | 0 | 0            | -0.013310456 |
| 0 | 0.027807301  | 0 | 0            | 0 | 0            | 0 | 0            | 0.018724935  |
| 0 | 0            | 0 | 0.003712679  | 0 | 0.011968907  | 0 | -0.046640223 | 0            |
| 0 | -0.011077572 | 0 | 0            | 0 | -0.026224225 | 0 | 0            | 0.016399203  |
| 0 | 0.009757375  | 0 | 0.013063792  | 0 | 0            | 0 | 0            | 0.007317178  |
| 0 | 0.001078872  | 0 | -0.041976956 | 0 | 0            | 0 | 0            | 0.017469819  |
| 0 | -0.036366621 | 0 | -0.005590925 | 0 | -0.05700724  | 0 | 0            | 0.043061183  |
| 0 | 0.053928192  | 0 | 0.021603171  | 0 | 0            | 0 | -0.037641654 | 0            |
| 0 | 0.032231716  | 0 | 0            | 0 | 0            | 0 | -0.036705935 | 0            |
| 0 | 0.032109677  | 0 | 0            | 0 | 0            | 0 | -0.037047294 | 0.027116558  |
| 0 | 0.038447636  | 0 | 0.015275369  | 0 | 0            | 0 | -0.055344312 | 0.024860793  |
| 0 | 0.038695862  | 0 | 0.015285786  | 0 | 0            | 0 | -0.055226477 | 0            |
| 0 | 0.052201609  | 0 | 0.032183378  | 0 | -0.022748943 | 0 | -0.044720094 | 0            |
| 0 | 0.025615247  | 0 | 0            | 0 | -0.01210697  | 0 | -0.044415774 | 0.03402948   |
| 0 | 0.02580493   | 0 | 0            | 0 | -0.012194786 | 0 | -0.044194424 | 0            |
| 0 | 0            | 0 | 0.025438547  | 0 | -0.040375412 | 0 | -0.031862804 | 0.06245789   |
| 0 | 0            | 0 | 0.025456856  | 0 | -0.040699437 | 0 | -0.031353888 | 0            |
| 0 | 0.03116469   | 0 | 0            | 0 | 0            | 0 | -0.053577087 | 0.02799983   |
| 0 | 0.044828619  | 0 | 0            | 0 | 0            | 0 | -0.037257851 | 0            |
| 0 | 0.03141187   | 0 | 0            | 0 | 0            | 0 | -0.053437249 | 0            |
| 0 | 0.031299625  | 0 | 0            | 0 | 0            | 0 | -0.052065891 | 0.029551367  |
| 0 | 0.04960004   | 0 | 0            | 0 | 0.011893779  | 0 | -0.036495791 | 0            |
| 0 | 0.05215351   | 0 | 0.018669602  | 0 | 0            | 0 | -0.0586795   | 0            |

|   |             |   |              |   |              |   |              |   |              |
|---|-------------|---|--------------|---|--------------|---|--------------|---|--------------|
| 0 | 0           | 0 | 0            | 0 | -0.024312769 | 0 | -0.040048623 | 0 | 0.055858088  |
| 0 | 0           | 0 | 0            | 0 | -0.024593102 | 0 | -0.039600504 | 0 | 0            |
| 0 | 0.040499623 | 0 | 0.016022916  | 0 | 0            | 0 | 0            | 0 | 0            |
| 0 | 0.040740135 | 0 | 0.016097717  | 0 | 0            | 0 | 0            | 0 | 0.020526063  |
| 0 | 0           | 0 | 0            | 0 | -0.023123107 | 0 | -0.037257528 | 0 | 0.045804785  |
| 0 | 0           | 0 | 0            | 0 | -0.022568376 | 0 | -0.036838701 | 0 | 0.057924658  |
| 0 | 0.044498228 | 0 | 0            | 0 | -0.005332803 | 0 | -0.052094327 | 0 | 0            |
| 0 | 0           | 0 | 0            | 0 | -0.022606553 | 0 | -0.036107595 | 0 | 0            |
| 0 | 0.021879076 | 0 | 0.04036949   | 0 | -0.059895518 | 0 | 0            | 0 | 0            |
| 0 | 0.021863812 | 0 | 0.040388325  | 0 | -0.059891127 | 0 | 0            | 0 | 0.044516739  |
| 0 | 0.051394852 | 0 | 0.019283211  | 0 | 0            | 0 | 0            | 0 | 0            |
| 0 | 0.052250825 | 0 | 0.025481519  | 0 | -0.011869582 | 0 | 0            | 0 | 0            |
| 0 | 0.032741828 | 0 | 0            | 0 | 0            | 0 | 0            | 0 | 0            |
| 0 | 0.03293571  | 0 | 0            | 0 | 0            | 0 | 0            | 0 | 0.023264084  |
| 0 | 0.03125287  | 0 | 0            | 0 | -0.003272519 | 0 | 0            | 0 | 0            |
| 0 | 0.033087094 | 0 | 0            | 0 | 0            | 0 | 0            | 0 | -0.024165831 |
| 0 | 0.031466725 | 0 | 0            | 0 | 0            | 0 | -0.038713613 | 0 | 0            |
| 0 | 0.031362249 | 0 | 0            | 0 | 0            | 0 | -0.039028066 | 0 | 0.02529777   |
| 0 | 0.031516731 | 0 | 0            | 0 | -0.003087169 | 0 | 0            | 0 | 0.026513603  |
| 0 | 0.029084636 | 0 | 0            | 0 | -0.004868379 | 0 | -0.037985521 | 0 | 0.029454812  |
| 0 | 0.029281471 | 0 | 0            | 0 | -0.004757049 | 0 | -0.037632785 | 0 | 0            |
| 0 | 0.030403971 | 0 | -0.002685792 | 0 | 0            | 0 | -0.037600354 | 0 | 0            |
| 0 | 0.030276847 | 0 | -0.002687265 | 0 | 0            | 0 | -0.037949835 | 0 | 0.027768347  |
| 0 | 0.031553298 | 0 | 0            | 0 | 0            | 0 | -0.038016417 | 0 | 0.011136961  |
| 0 | 0           | 0 | 0            | 0 | 0            | 0 | -0.039441209 | 0 | 0.054591626  |
| 0 | 0           | 0 | 0            | 0 | 0            | 0 | -0.038767531 | 0 | 0            |
| 0 | 0           | 0 | 0.001764243  | 0 | 0            | 0 | -0.038492142 | 0 | 0.057632729  |
| 0 | 0           | 0 | 0            | 0 | 0            | 0 | -0.038185486 | 0 | 0.046342365  |
| 0 | 0           | 0 | 0.028998497  | 0 | -0.051492606 | 0 | 0            | 0 | 0            |
| 0 | 0           | 0 | 0.001636599  | 0 | 0            | 0 | -0.037754444 | 0 | 0            |
| 0 | 0           | 0 | 0.029108422  | 0 | -0.051587355 | 0 | 0            | 0 | 0.062513687  |
| 0 | 0           | 0 | 0.035105108  | 0 | -0.064193968 | 0 | 0            | 0 | 0            |
| 0 | 0.047067445 | 0 | 0            | 0 | 0.00840602   | 0 | 0            | 0 | 0            |
| 0 | 0           | 0 | 0.034253708  | 0 | -0.062551953 | 0 | 0            | 0 | 0.019494162  |
| 0 | 0           | 0 | 0.035148548  | 0 | -0.064154924 | 0 | 0            | 0 | 0.06316176   |
| 0 | 0.046411308 | 0 | 0            | 0 | 0.007821299  | 0 | -0.038702812 | 0 | 0            |
| 0 | 0           | 0 | 0.000260863  | 0 | 0            | 0 | -0.05386378  | 0 | 0.057009455  |
| 0 | 0           | 0 | 0            | 0 | 0            | 0 | -0.053832082 | 0 | 0.061100858  |
| 0 | 0.044507219 | 0 | -0.000162909 | 0 | 0            | 0 | -0.038154979 | 0 | 0            |
| 0 | 0           | 0 | 0.000240728  | 0 | 0            | 0 | -0.051913311 | 0 | 0.061088927  |
| 0 | 0           | 0 | 6.91E-05     | 0 | 0            | 0 | -0.053540083 | 0 | 0            |
| 0 | 0.047721593 | 0 | -0.004480378 | 0 | 0.012658575  | 0 | -0.037233666 | 0 | 0            |
| 0 | 0.016005346 | 0 | 0.00101142   | 0 | -0.029864673 | 0 | -0.05339166  | 0 | 0.043405896  |
| 0 | 0.015977902 | 0 | 0            | 0 | -0.028973003 | 0 | -0.053424483 | 0 | 0.044712263  |
| 0 | 0.016010787 | 0 | 0            | 0 | -0.028924143 | 0 | -0.053345913 | 0 | 0.043269669  |
| 0 | 0           | 0 | 0            | 0 | -0.024399021 | 0 | -0.03859786  | 0 | 0.055509694  |
| 0 | 0.016300495 | 0 | 0.000951565  | 0 | -0.029962639 | 0 | -0.053188832 | 0 | 0            |

|   |             |   |              |   |              |   |              |   |              |
|---|-------------|---|--------------|---|--------------|---|--------------|---|--------------|
| 0 | 0.016307897 | 0 | 0            | 0 | -0.029068174 | 0 | -0.053125101 | 0 | 0            |
| 0 | 0           | 0 | 0            | 0 | -0.024430633 | 0 | -0.037902118 | 0 | 0            |
| 0 | 0           | 0 | 0            | 0 | -0.024705134 | 0 | -0.037629047 | 0 | 0.044453982  |
| 0 | 0           | 0 | -0.000904919 | 0 | -0.023815357 | 0 | -0.037736103 | 0 | 0.057211032  |
| 0 | 0           | 0 | 0            | 0 | -0.024412038 | 0 | 0            | 0 | 0            |
| 0 | 0           | 0 | -0.001021954 | 0 | -0.023738586 | 0 | -0.037007605 | 0 | 0            |
| 0 | 0           | 0 | 0            | 0 | -0.024407741 | 0 | 0            | 0 | 0.054955018  |
| 0 | 0           | 0 | 0            | 0 | -0.024694729 | 0 | 0            | 0 | 0.009744094  |
| 0 | 0           | 0 | 0.000582559  | 0 | -0.035478203 | 0 | -0.048592052 | 0 | 0.057754442  |
| 0 | 0           | 0 | 0            | 0 | -0.034977717 | 0 | -0.048590276 | 0 | 0.055168952  |
| 0 | 0           | 0 | 0.000581102  | 0 | -0.035028164 | 0 | -0.047766729 | 0 | 0.055290564  |
| 0 | 0           | 0 | 0.000495115  | 0 | -0.0357428   | 0 | -0.0481768   | 0 | 0            |
| 0 | 0           | 0 | -0.011116266 | 0 | 0            | 0 | -0.038963017 | 0 | 0.052816637  |
| 0 | 0           | 0 | -0.011193636 | 0 | 0            | 0 | -0.038301661 | 0 | 0            |
| 0 | 0           | 0 | -0.011084636 | 0 | 0            | 0 | -0.037927912 | 0 | 0.042026011  |
| 0 | 0.030082783 | 0 | -0.004583571 | 0 | 0            | 0 | 0            | 0 | 0            |
| 0 | 0.04764182  | 0 | 0.04228925   | 0 | -0.054524186 | 0 | 0            | 0 | 0            |
| 0 | 0.028555141 | 0 | 0            | 0 | -0.007351053 | 0 | 0            | 0 | 0            |
| 0 | 0.028683242 | 0 | -0.00302192  | 0 | -0.004461016 | 0 | 0            | 0 | 0            |
| 0 | 0.030436305 | 0 | -0.004466838 | 0 | 0            | 0 | 0            | 0 | -0.024241616 |
| 0 | 0.028863812 | 0 | 0            | 0 | -0.007276714 | 0 | 0            | 0 | -0.021590869 |
| 0 | 0.030288443 | 0 | -0.004539989 | 0 | 0            | 0 | 0            | 0 | 0.02502797   |
| 0 | 0.013330446 | 0 | 0            | 0 | -0.038149564 | 0 | 0            | 0 | 0            |
| 0 | 0.028811562 | 0 | 0            | 0 | -0.007163367 | 0 | 0            | 0 | 0.0274056    |
| 0 | 0.032430244 | 0 | 0            | 0 | 0            | 0 | 0            | 0 | -0.02703091  |
| 0 | 0.028930616 | 0 | -0.003053344 | 0 | -0.004249843 | 0 | 0            | 0 | 0.027811734  |
| 0 | 0.013316035 | 0 | 0            | 0 | -0.038113707 | 0 | 0            | 0 | 0.046429759  |
| 0 | 0.012403715 | 0 | 0            | 0 | -0.039766206 | 0 | 0            | 0 | -6.30E-05    |
| 0 | 0           | 0 | 0            | 0 | 0            | 0 | -0.040194032 | 0 | 0.043381045  |
| 0 | 0           | 0 | 0            | 0 | 0            | 0 | 0            | 0 | 0.00641653   |
| 0 | 0           | 0 | -4.83E-05    | 0 | 0            | 0 | 0            | 0 | 0            |
| 0 | 0.023281815 | 0 | -0.01391897  | 0 | 0            | 0 | -0.066352193 | 0 | 0.035268366  |
| 0 | 0           | 0 | -1.28E-05    | 0 | 0            | 0 | 0            | 0 | 0.05403924   |
| 0 | 0.023643717 | 0 | -0.013996314 | 0 | 0            | 0 | -0.066228165 | 0 | 0            |
| 0 | 0.022744886 | 0 | -0.014592985 | 0 | 0            | 0 | -0.068669408 | 0 | 0.0501091    |
| 0 | 0           | 0 | 0            | 0 | -0.042575572 | 0 | 0            | 0 | 0.01275838   |
| 0 | 0           | 0 | -0.000287483 | 0 | 0            | 0 | 0            | 0 | 0.009364514  |
| 0 | 0.045378355 | 0 | -0.005903682 | 0 | 0.010447346  | 0 | 0            | 0 | 0            |
| 0 | 0.029275223 | 0 | 0            | 0 | 0            | 0 | -0.075296214 | 0 | 0.05664485   |
| 0 | 0           | 0 | -0.002571609 | 0 | -0.024282193 | 0 | 0            | 0 | 0            |
| 0 | 0           | 0 | 0            | 0 | -0.02679246  | 0 | 0            | 0 | 0.00639333   |
| 0 | 0           | 0 | -0.00237283  | 0 | -0.024627028 | 0 | 0            | 0 | 0.007529639  |
| 0 | 0           | 0 | -0.002540114 | 0 | -0.024308965 | 0 | 0            | 0 | 0.054561061  |
| 0 | 0           | 0 | -0.019076283 | 0 | 0            | 0 | -0.062844935 | 0 | 0.067273149  |
| 0 | 0.040764889 | 0 | -0.002497248 | 0 | -0.01877984  | 0 | -0.062729718 | 0 | 0            |
| 0 | 0           | 0 | -0.012958461 | 0 | 0            | 0 | 0            | 0 | 0.002853833  |
| 0 | 0.029848451 | 0 | 0.02953931   | 0 | -0.029390007 | 0 | -0.034029084 | 0 | 0.035094311  |

|   |             |   |              |   |              |   |              |   |              |
|---|-------------|---|--------------|---|--------------|---|--------------|---|--------------|
| 0 | 0.030000734 | 0 | 0.029590037  | 0 | -0.029533799 | 0 | -0.033778118 | 0 | 0            |
| 0 | 0.032384261 | 0 | 0.001678907  | 0 | 0            | 0 | 0            | 0 | 0            |
| 0 | 0.031663169 | 0 | 0            | 0 | 0            | 0 | 0            | 0 | -0.007963511 |
| 0 | 0.032446186 | 0 | 0.001716541  | 0 | 0            | 0 | 0            | 0 | 0.033115371  |
| 0 | 0           | 0 | 0.001961026  | 0 | -0.064233413 | 0 | 0            | 0 | 0.017226233  |
| 0 | 0.00025918  | 0 | 0.001939732  | 0 | -0.064192285 | 0 | 0            | 0 | 0            |
| 0 | 4.50E-05    | 0 | 0            | 0 | -0.062527884 | 0 | 0            | 0 | 0.016771876  |
| 0 | 0.000115008 | 0 | 0.00197801   | 0 | -0.064181729 | 0 | 0            | 0 | 0.061773665  |
| 0 | 0.037997792 | 0 | 0.015903238  | 0 | 0            | 0 | -0.035930828 | 0 | 0.024363997  |
| 0 | 0.038121018 | 0 | 0.015908093  | 0 | 0            | 0 | -0.035620002 | 0 | 0            |
| 0 | 0           | 0 | 0            | 0 | -0.019102076 | 0 | -0.036798664 | 0 | 0            |
| 0 | 0.050168523 | 0 | 0.019708031  | 0 | 0            | 0 | -0.036869241 | 0 | 0            |
| 0 | 0           | 0 | 0.013306448  | 0 | -0.036299552 | 0 | -0.042248113 | 0 | 0            |
| 0 | 0.030342728 | 0 | 0            | 0 | 0            | 0 | -0.035637832 | 0 | 0            |
| 0 | 0.030226843 | 0 | 0            | 0 | 0            | 0 | -0.035960171 | 0 | 0.025878783  |
| 0 | 0.048547758 | 0 | 0.031498314  | 0 | -0.024879662 | 0 | -0.043076186 | 0 | 0            |
| 0 | 0.035997754 | 0 | 0.013642174  | 0 | 0            | 0 | -0.05181525  | 0 | 0.025114925  |
| 0 | 0.036237979 | 0 | 0.013650286  | 0 | 0            | 0 | -0.051693442 | 0 | 0            |
| 0 | -0.00411874 | 0 | 0.001990995  | 0 | -0.071749565 | 0 | 0            | 0 | 0.016210518  |
| 0 | 0           | 0 | 0.02548821   | 0 | -0.041462431 | 0 | -0.031180339 | 0 | 0.058822215  |
| 0 | 0.023240051 | 0 | 0            | 0 | -0.013405952 | 0 | -0.041427729 | 0 | 0.033909723  |
| 0 | 0           | 0 | 0.025507575  | 0 | -0.041769906 | 0 | -0.03070317  | 0 | 0            |
| 0 | 0.023421531 | 0 | 0            | 0 | -0.013495565 | 0 | -0.041202886 | 0 | 0            |
| 0 | 0.036250715 | 0 | 0.01370752   | 0 | 0            | 0 | -0.049249056 | 0 | 0.028208787  |
| 0 | 0.028011223 | 0 | 0            | 0 | -0.004878081 | 0 | -0.034484911 | 0 | 0.031111186  |
| 0 | 0.028242424 | 0 | 0            | 0 | -0.004742123 | 0 | -0.034098335 | 0 | 0            |
| 0 | 0           | 0 | 0.0302091    | 0 | -0.051911551 | 0 | -0.03548149  | 0 | 0.063988875  |
| 0 | 0.030465136 | 0 | 0            | 0 | 0            | 0 | -0.03453449  | 0 | 0.015044207  |
| 0 | 0           | 0 | 0.029953803  | 0 | -0.05172709  | 0 | -0.034668195 | 0 | 0            |
| 0 | 0.051762885 | 0 | 0.025787016  | 0 | -0.011808347 | 0 | -0.034727029 | 0 | 0            |
| 0 | 0.024358426 | 0 | 0            | 0 | -0.011692303 | 0 | -0.038889379 | 0 | 0.026069776  |
| 0 | 0.030381094 | 0 | -0.000987424 | 0 | 0            | 0 | 0            | 0 | -0.013458959 |
| 0 | 0           | 0 | -0.005826732 | 0 | 0            | 0 | -0.037571874 | 0 | 0            |
| 0 | 0.029618084 | 0 | 0            | 0 | 0            | 0 | -0.048965267 | 0 | 0.028628358  |
| 0 | 0           | 0 | 0.023148329  | 0 | -0.037903728 | 0 | -0.027092717 | 0 | 0.044163925  |
| 0 | 0.045716949 | 0 | 0            | 0 | 0.008407478  | 0 | -0.035616421 | 0 | 0            |
| 0 | 0.028396081 | 0 | 0.029375268  | 0 | -0.033736219 | 0 | 0            | 0 | 0            |
| 0 | 0.028470596 | 0 | 0.029386915  | 0 | -0.033687291 | 0 | 0            | 0 | 0.035390208  |
| 0 | 0           | 0 | 0            | 0 | -0.023756597 | 0 | -0.035705813 | 0 | 0.042933507  |
| 0 | 0           | 0 | 0            | 0 | -0.02352006  | 0 | -0.035633343 | 0 | 0.055008688  |
| 0 | 0           | 0 | -0.010509131 | 0 | 0            | 0 | 0            | 0 | 0.02033884   |
| 0 | 0.020722602 | 0 | 0.03755824   | 0 | -0.056286003 | 0 | 0            | 0 | 0            |
| 0 | 0           | 0 | 0            | 0 | -0.023550812 | 0 | -0.03495351  | 0 | 0            |
| 0 | 0.020707079 | 0 | 0.037568828  | 0 | -0.056259509 | 0 | 0            | 0 | 0.043920091  |
| 0 | 0.021405145 | 0 | 0.036724579  | 0 | -0.054305014 | 0 | 0            | 0 | 0.001643099  |
| 0 | 0.0378222   | 0 | 0.014284732  | 0 | 0            | 0 | 0            | 0 | 0            |
| 0 | 0.038047252 | 0 | 0.014356333  | 0 | 0            | 0 | 0            | 0 | 0.020373644  |

|   |             |   |              |   |              |   |              |   |              |
|---|-------------|---|--------------|---|--------------|---|--------------|---|--------------|
| 0 | 0           | 0 | 0            | 0 | -0.024072969 | 0 | -0.034221654 | 0 | 0.045050066  |
| 0 | 0           | 0 | -0.012878177 | 0 | -0.009021683 | 0 | -0.036853322 | 0 | 0            |
| 0 | 0           | 0 | 0.005959268  | 0 | -0.025518693 | 0 | -0.033578398 | 0 | 0            |
| 0 | 0.038076916 | 0 | 0.014031761  | 0 | 0            | 0 | 0            | 0 | -0.022569399 |
| 0 | 0.048694279 | 0 | 0.025249818  | 0 | -0.014925376 | 0 | 0            | 0 | 0            |
| 0 | 0.027734673 | 0 | 0            | 0 | -0.006679572 | 0 | 0            | 0 | 0            |
| 0 | 0           | 0 | 0.008028715  | 0 | -0.028697026 | 0 | 0            | 0 | 0            |
| 0 | 0.027944889 | 0 | 0            | 0 | -0.006523377 | 0 | 0            | 0 | 0.027761069  |
| 0 | 0.031242688 | 0 | 0            | 0 | 0            | 0 | 0            | 0 | -0.022714373 |
| 0 | 0           | 0 | 0.028793758  | 0 | -0.052263186 | 0 | 0            | 0 | 0            |
| 0 | 0           | 0 | 0.028899192  | 0 | -0.052359303 | 0 | 0            | 0 | 0.060227997  |
| 0 | 0.02792459  | 0 | 0            | 0 | -0.006909712 | 0 | 0            | 0 | -0.015726237 |
| 0 | 0           | 0 | 0.032430145  | 0 | -0.060023869 | 0 | 0            | 0 | 0.019122931  |
| 0 | 0           | 0 | 0.028679876  | 0 | -0.0525385   | 0 | 0            | 0 | 0.020353665  |
| 0 | 0           | 0 | 0.001150179  | 0 | 0            | 0 | -0.037376968 | 0 | 0.054334039  |
| 0 | 0           | 0 | 0            | 0 | 0            | 0 | -0.037130211 | 0 | 0.043596534  |
| 0 | 0           | 0 | 0.0010357    | 0 | 0            | 0 | -0.036726711 | 0 | 0            |
| 0 | 0           | 0 | 0.000657698  | 0 | 0            | 0 | -0.035881701 | 0 | 0.047400781  |
| 0 | 0.027118631 | 0 | -0.005388677 | 0 | 0            | 0 | -0.036372885 | 0 | 0.027938132  |
| 0 | 0.027248992 | 0 | -0.005387482 | 0 | 0            | 0 | -0.036024988 | 0 | 0            |
| 0 | 0.025162283 | 0 | 0            | 0 | -0.008900288 | 0 | -0.036481614 | 0 | 0.030966468  |
| 0 | 0.025386833 | 0 | 0            | 0 | -0.008768199 | 0 | -0.036102817 | 0 | 0            |
| 0 | 0.029607057 | 0 | 0            | 0 | 0            | 0 | -0.036755243 | 0 | 0.014483546  |
| 0 | 0           | 0 | -0.000416733 | 0 | 0            | 0 | -0.049164647 | 0 | 0.058243545  |
| 0 | 0.025288019 | 0 | -0.003303989 | 0 | -0.005966734 | 0 | -0.035317472 | 0 | 0.03249194   |
| 0 | 0.025534231 | 0 | -0.003365608 | 0 | -0.005762405 | 0 | -0.03491048  | 0 | 0            |
| 0 | 0.025175764 | 0 | 0            | 0 | -0.009263721 | 0 | -0.035336679 | 0 | 0.019470461  |
| 0 | 0.02737185  | 0 | -0.005297386 | 0 | 0            | 0 | -0.035226086 | 0 | 0.01636969   |
| 0 | 0           | 0 | 0            | 0 | -0.025670084 | 0 | 0            | 0 | 0.009389601  |
| 0 | 0.043862374 | 0 | -0.006686924 | 0 | 0.010961564  | 0 | -0.036006958 | 0 | 0            |
| 0 | 0.014125248 | 0 | -0.001126971 | 0 | -0.028470822 | 0 | -0.048879733 | 0 | 0.044013254  |
| 0 | 0.014158929 | 0 | 0            | 0 | -0.029453161 | 0 | -0.048851297 | 0 | 0.044018845  |
| 0 | 0.01291878  | 0 | 0            | 0 | -0.035824944 | 0 | 0            | 0 | 0.002083664  |
| 0 | 0.014546233 | 0 | -0.001120494 | 0 | -0.027803458 | 0 | -0.048100525 | 0 | 0.043564917  |
| 0 | 0.014414117 | 0 | -0.001185353 | 0 | -0.02857052  | 0 | -0.048652642 | 0 | 0            |
| 0 | 0           | 0 | -0.003007568 | 0 | -0.023097289 | 0 | -0.036180622 | 0 | 0.0545296    |
| 0 | 0           | 0 | 0            | 0 | -0.026034076 | 0 | -0.036185876 | 0 | 0.042657058  |
| 0 | 0           | 0 | -0.003123179 | 0 | -0.023015321 | 0 | -0.035499817 | 0 | 0            |
| 0 | 0           | 0 | -0.002681006 | 0 | -0.023792046 | 0 | -0.035055054 | 0 | 0.044409462  |
| 0 | 0           | 0 | -0.001494276 | 0 | -0.033496166 | 0 | -0.044707267 | 0 | 0.053012722  |
| 0 | 0           | 0 | -0.012877116 | 0 | 0            | 0 | -0.036456615 | 0 | 0.039420075  |
| 0 | 0.025714613 | 0 | 0.030205368  | 0 | -0.023091709 | 0 | -0.040861779 | 0 | 0.040500139  |
| 0 | 0.025929832 | 0 | 0.030261793  | 0 | -0.023238229 | 0 | -0.040583104 | 0 | 0            |
| 0 | 0           | 0 | -0.000923039 | 0 | 0            | 0 | 0            | 0 | 0.008526442  |
| 0 | 0.032591746 | 0 | 0.019968423  | 0 | 0            | 0 | -0.039472076 | 0 | 0.031516248  |
| 0 | 0.032773771 | 0 | 0.01998393   | 0 | 0            | 0 | -0.039081559 | 0 | 0            |
| 0 | 0.024956418 | 0 | -0.004868641 | 0 | -0.00653728  | 0 | 0            | 0 | 0            |

|   |             |   |              |   |              |   |              |              |
|---|-------------|---|--------------|---|--------------|---|--------------|--------------|
| 0 | 0.027383576 | 0 | -0.00701504  | 0 | 0            | 0 | 0            | -0.021140771 |
| 0 | 0.025152362 | 0 | -0.004891915 | 0 | -0.006370013 | 0 | 0            | 0.029594458  |
| 0 | 0.025008422 | 0 | 0            | 0 | -0.011248876 | 0 | 0            | -0.016908166 |
| 0 | 0.025174986 | 0 | -0.004650815 | 0 | -0.006818768 | 0 | 0            | -0.01584405  |
| 0 | 0.021063197 | 0 | -0.015342631 | 0 | 0            | 0 | -0.061421697 | 0.048125093  |
| 0 | 0.030597372 | 0 | 0.017610365  | 0 | 0            | 0 | -0.055898179 | 0.031914141  |
| 0 | 0.030890807 | 0 | 0.017618861  | 0 | 0            | 0 | -0.055741359 | 0            |
| 0 | 0           | 0 | 0.027019845  | 0 | -0.034194282 | 0 | -0.038791194 | 0.06048975   |
| 0 | 0.030872411 | 0 | 0.017708737  | 0 | 0            | 0 | -0.052824995 | 0.034819707  |
| 0 | 0.022844097 | 0 | 0            | 0 | 0            | 0 | -0.039300355 | 0.033827718  |
| 0 | 0.023018551 | 0 | 0            | 0 | 0            | 0 | -0.038877789 | 0            |
| 0 | 0           | 0 | 0.02703016   | 0 | -0.034505645 | 0 | -0.038301121 | 0            |
| 0 | 0.04859573  | 0 | 0.024940485  | 0 | 0            | 0 | -0.040460365 | 0            |
| 0 | 0.026394767 | 0 | 0            | 0 | 0.006609257  | 0 | -0.038212111 | 0.033685372  |
| 0 | 0.026648962 | 0 | 0            | 0 | 0.006761567  | 0 | -0.037794019 | 0            |
| 0 | 0           | 0 | 0.028263174  | 0 | -0.037648706 | 0 | -0.03909876  | 0.064618042  |
| 0 | 0.02306209  | 0 | 0            | 0 | 0            | 0 | -0.037731309 | 0.022304559  |
| 0 | 0           | 0 | 0.028008001  | 0 | -0.037454284 | 0 | -0.038273831 | 0            |
| 0 | 0           | 0 | 0.024693174  | 0 | -0.030589111 | 0 | -0.034792593 | 0.049019096  |
| 0 | 0.018982415 | 0 | 0            | 0 | -0.006832074 | 0 | -0.048327102 | 0.039229433  |
| 0 | 0.019227914 | 0 | 0            | 0 | -0.006917815 | 0 | -0.048077958 | 0            |
| 0 | 0           | 0 | -0.004277727 | 0 | -0.024083237 | 0 | 0            | 0.007689077  |
| 0 | 0.022290181 | 0 | 0            | 0 | 0            | 0 | -0.05217197  | 0.035332094  |
| 0 | 0.020127162 | 0 | 0            | 0 | -0.005018349 | 0 | -0.045774072 | 0.033972773  |
| 0 | 0.04751413  | 0 | 0.032215533  | 0 | -0.017277945 | 0 | -0.050985685 | 0            |
| 0 | 0.051487823 | 0 | 0.023422158  | 0 | 0.003079924  | 0 | -0.03838649  | 0            |
| 0 | 0.045448906 | 0 | 0            | 0 | 0.021002902  | 0 | -0.039536786 | 0            |
| 0 | 0           | 0 | 0            | 0 | -0.01111734  | 0 | -0.039468769 | 0.055581894  |
| 0 | 0           | 0 | 0            | 0 | -0.011149926 | 0 | -0.038780675 | 0            |
| 0 | 0           | 0 | 0.007194789  | 0 | 0            | 0 | -0.040962766 | 0.056325788  |
| 0 | 0           | 0 | 0            | 0 | -0.01541006  | 0 | -0.043583579 | 0.047708816  |
| 0 | 0           | 0 | 0.007077074  | 0 | 0            | 0 | -0.04025597  | 0            |
| 0 | 0           | 0 | 0            | 0 | 0            | 0 | -0.040078409 | 0.042731382  |
| 0 | 0           | 0 | 0            | 0 | -0.011671517 | 0 | -0.037891355 | 0.046028847  |
| 0 | 0.026587946 | 0 | 0.027204284  | 0 | -0.02048126  | 0 | 0            | 0            |
| 0 | 0           | 0 | 0.006687715  | 0 | 0            | 0 | -0.039322483 | 0.048943356  |
| 0 | 0.032403197 | 0 | 0.01816974   | 0 | 0            | 0 | 0            | 0            |
| 0 | 0.026688786 | 0 | 0.027199642  | 0 | -0.020396426 | 0 | 0            | 0.037584157  |
| 0 | 0.032598617 | 0 | 0.018237741  | 0 | 0            | 0 | 0            | 0.027087572  |
| 0 | 0           | 0 | 0.005474182  | 0 | 0            | 0 | -0.053587124 | 0.060434029  |
| 0 | 0.032603403 | 0 | 0.017889086  | 0 | 0            | 0 | 0            | -0.019374214 |
| 0 | 0.026017616 | 0 | 0            | 0 | 0.004553995  | 0 | 0            | 0            |
| 0 | 0.0238858   | 0 | 0            | 0 | 0            | 0 | 0            | -0.018989316 |
| 0 | 0.030797447 | 0 | 0.001307547  | 0 | 0            | 0 | 0            | -0.006188835 |
| 0 | 0.0262522   | 0 | 0            | 0 | 0.004730086  | 0 | 0            | 0.02991909   |
| 0 | 0           | 0 | 0.026733024  | 0 | -0.038066618 | 0 | 0            | 0            |
| 0 | 0           | 0 | 0.026825073  | 0 | -0.038146936 | 0 | 0            | 0.060349632  |

|   |             |   |              |   |              |   |              |              |
|---|-------------|---|--------------|---|--------------|---|--------------|--------------|
| 0 | 0.015006968 | 0 | 0.039299701  | 0 | -0.054218525 | 0 | 0            | 0            |
| 0 | 0.026217938 | 0 | 0            | 0 | 0.004334932  | 0 | 0            | -0.017428749 |
| 0 | 0.01016052  | 0 | -0.042107312 | 0 | 0            | 0 | 0            | 0.010146709  |
| 0 | 0.015492947 | 0 | 0.038658599  | 0 | -0.05269016  | 0 | 0            | 0.004887763  |
| 0 | 0.04803076  | 0 | 0.022840193  | 0 | -0.000485825 | 0 | 0            | 0            |
| 0 | 0.014954602 | 0 | 0.039308964  | 0 | -0.054193875 | 0 | 0            | 0.051235206  |
| 0 | 0           | 0 | 0.026560577  | 0 | -0.038283526 | 0 | 0            | 0.016900997  |
| 0 | 0.020529184 | 0 | -0.003278931 | 0 | 0            | 0 | -0.040033758 | 0.035508107  |
| 0 | 0.020715579 | 0 | -0.003272126 | 0 | 0            | 0 | -0.039584911 | 0            |
| 0 | 0.024033948 | 0 | 0.029037644  | 0 | 0            | 0 | -0.048886784 | 0.03955292   |
| 0 | 0.024261126 | 0 | 0.029064566  | 0 | 0            | 0 | -0.048403749 | 0            |
| 0 | 0.023333913 | 0 | 0            | 0 | 0.002569849  | 0 | -0.040496227 | 0.033323511  |
| 0 | 0.023578626 | 0 | 0            | 0 | 0.002716668  | 0 | -0.040089701 | 0            |
| 0 | 0.02205154  | 0 | 0            | 0 | 0            | 0 | -0.040184653 | 0.019692966  |
| 0 | 0           | 0 | 0.035579078  | 0 | -0.057004108 | 0 | 0            | 0.018026346  |
| 0 | 0.023550575 | 0 | -0.005758101 | 0 | 0.007895198  | 0 | -0.039023605 | 0.034704667  |
| 0 | 0.02381181  | 0 | -0.005823762 | 0 | 0.008113883  | 0 | -0.038589661 | 0            |
| 0 | 0.02077636  | 0 | -0.003158783 | 0 | 0            | 0 | -0.038737722 | 0.022951028  |
| 0 | 0.023353232 | 0 | 0            | 0 | 0.00218873   | 0 | -0.039169719 | 0.020530805  |
| 0 | 0.025858051 | 0 | 0.025589019  | 0 | 0.006094556  | 0 | -0.047139874 | 0.041121416  |
| 0 | -0.00044228 | 0 | -0.000155352 | 0 | -0.060201614 | 0 | 0            | 0.018350943  |
| 0 | 0.02621025  | 0 | 0.025458843  | 0 | 0.006425924  | 0 | -0.046623524 | 0            |
| 0 | 0           | 0 | 0            | 0 | -0.013444742 | 0 | 0            | 0.005456895  |
| 0 | 0.023857481 | 0 | 0.028599481  | 0 | 0            | 0 | -0.047105193 | 0.031314066  |
| 0 | 0.017425524 | 0 | 0.034696412  | 0 | -0.015195046 | 0 | -0.060018591 | 0.049168712  |
| 0 | 0.017764511 | 0 | 0.034772315  | 0 | -0.015287094 | 0 | -0.059762668 | 0            |
| 0 | 0           | 0 | 0.004940811  | 0 | 0            | 0 | 0            | 0.006297853  |
| 0 | 0           | 0 | -0.005519859 | 0 | -0.008163184 | 0 | -0.040003185 | 0.05462438   |
| 0 | 0           | 0 | -0.005633228 | 0 | -0.008085029 | 0 | -0.03932127  | 0            |
| 0 | 0           | 0 | -0.009037225 | 0 | 0            | 0 | -0.039973531 | 0.039807974  |
| 0 | 0           | 0 | 0            | 0 | -0.013499204 | 0 | -0.040140833 | 0.042275569  |
| 0 | 0.025748817 | 0 | 0            | 0 | 0.02911688   | 0 | -0.047100711 | 0            |
| 0 | 0.025538458 | 0 | 0            | 0 | 0.028995035  | 0 | -0.047495584 | 0.032269469  |
| 0 | 0.043216626 | 0 | -0.009394267 | 0 | 0.025984866  | 0 | -0.039899698 | 0            |
| 0 | 0.018598951 | 0 | 0.033038537  | 0 | -0.011960004 | 0 | -0.057054585 | 0.046606295  |
| 0 | 0.021424373 | 0 | 0.026045757  | 0 | 0            | 0 | -0.066304153 | 0.048608119  |
| 0 | 0           | 0 | 0.025494999  | 0 | -0.011718074 | 0 | -0.048444444 | 0.061786304  |
| 0 | 0           | 0 | -0.005147557 | 0 | -0.008911408 | 0 | -0.038703223 | 0.043761337  |
| 0 | 0           | 0 | 0.025266666  | 0 | -0.011556982 | 0 | -0.047666632 | 0            |
| 0 | 0           | 0 | 0.017901036  | 0 | 0            | 0 | -0.047839763 | 0.047316074  |
| 0 | 0           | 0 | 0.009085001  | 0 | -0.028798644 | 0 | -0.034870126 | 0            |
| 0 | 0           | 0 | 0.030977846  | 0 | -0.021275838 | 0 | -0.055455883 | 0.058578041  |
| 0 | 0.048593396 | 0 | 0.021118849  | 0 | 0.027322926  | 0 | -0.048518782 | 0            |
| 0 | 0.025412767 | 0 | 0            | 0 | 0.02866379   | 0 | -0.045721209 | 0.020875479  |
| 0 | 0           | 0 | 0.025022604  | 0 | -0.011548149 | 0 | -0.046719971 | 0.05332608   |
| 0 | 0.008723271 | 0 | -0.002930529 | 0 | -0.021779874 | 0 | -0.056694275 | 0.05028133   |
| 0 | 0.009095929 | 0 | -0.00292454  | 0 | -0.021172405 | 0 | -0.056052176 | 0.053211806  |

|   |              |   |              |   |              |   |              |   |              |
|---|--------------|---|--------------|---|--------------|---|--------------|---|--------------|
| 0 | 0.00881197   | 0 | 0            | 0 | -0.024302391 | 0 | -0.056664241 | 0 | 0.053934801  |
| 0 | 0.009075476  | 0 | -0.003007205 | 0 | -0.021873259 | 0 | -0.056446685 | 0 | 0            |
| 0 | 0            | 0 | -0.003133011 | 0 | -0.02494695  | 0 | -0.05408362  | 0 | 0.059070486  |
| 0 | 0            | 0 | 0            | 0 | 0.011062314  | 0 | -0.047049267 | 0 | 0.041489696  |
| 0 | 0.008225344  | 0 | 0            | 0 | 0            | 0 | -0.047394209 | 0 | 0.030964177  |
| 0 | 0.006830527  | 0 | 0            | 0 | -0.032793193 | 0 | 0            | 0 | 0.006063292  |
| 0 | 0.014167746  | 0 | -0.013801147 | 0 | 0            | 0 | -0.066290259 | 0 | 0.056600263  |
| 0 | 0.0230962    | 0 | -0.007546002 | 0 | 0.007269265  | 0 | 0            | 0 | 0            |
| 0 | 0.020725118  | 0 | -0.00510644  | 0 | 0            | 0 | 0            | 0 | -0.017791201 |
| 0 | 0.023324051  | 0 | -0.007575755 | 0 | 0.007468413  | 0 | 0            | 0 | 0.031369762  |
| 0 | 0.023357008  | 0 | -0.007289167 | 0 | 0.006984606  | 0 | 0            | 0 | -0.018151436 |
| 0 | 0.023069402  | 0 | 0            | 0 | -4.65E-05    | 0 | 0            | 0 | -0.019045763 |
| 0 | 0.011227121  | 0 | 0            | 0 | 0.006728087  | 0 | -0.065352978 | 0 | 0.050848258  |
| 0 | 0            | 0 | -0.006973424 | 0 | -0.009161563 | 0 | 0            | 0 | 0.002975788  |
| 0 | 0.025238658  | 0 | 0.023422578  | 0 | 0.0083663    | 0 | 0            | 0 | 0            |
| 0 | 0.022707022  | 0 | 0.027608406  | 0 | 0            | 0 | 0            | 0 | -0.020569937 |
| 0 | 0.025498352  | 0 | 0.023386168  | 0 | 0.00864151   | 0 | 0            | 0 | 0.03651275   |
| 0 | 0.025442295  | 0 | 0.023046504  | 0 | 0.008626856  | 0 | 0            | 0 | -0.019544126 |
| 0 | 0.022699346  | 0 | -0.009701683 | 0 | 0.034536356  | 0 | -0.04775249  | 0 | 0            |
| 0 | 0.022485386  | 0 | -0.009643524 | 0 | 0.034361895  | 0 | -0.048167211 | 0 | 0.033485215  |
| 0 | 0.022097166  | 0 | 0            | 0 | 0.025223156  | 0 | -0.048641006 | 0 | 0.018894817  |
| 0 | 0.025137637  | 0 | 0            | 0 | 0.029212772  | 0 | 0            | 0 | -0.029669732 |
| 0 | 0.022455179  | 0 | -0.009242602 | 0 | 0.033795907  | 0 | -0.046694422 | 0 | 0.01943636   |
| 0 | 0            | 0 | 0.022808355  | 0 | -0.008805533 | 0 | 0            | 0 | 0.001860451  |
| 0 | 0            | 0 | -0.00902803  | 0 | 0.018056782  | 0 | -0.047733895 | 0 | 0.038811762  |
| 0 | 0.008450804  | 0 | 0.002675711  | 0 | 0            | 0 | -0.048884075 | 0 | 0.032758066  |
| 0 | 0.024918748  | 0 | 0.004248324  | 0 | 0            | 0 | 0            | 0 | -0.0021623   |
| 0 | 0            | 0 | 0.007122708  | 0 | -0.014546739 | 0 | -0.038618099 | 0 | 0            |
| 0 | 0.022074194  | 0 | -0.011920287 | 0 | 0.036624601  | 0 | 0            | 0 | -0.030594504 |
| 0 | -0.008410962 | 0 | -0.002017641 | 0 | -0.058212164 | 0 | 0            | 0 | 0.024109701  |
| 0 | -0.00229799  | 0 | -0.005515951 | 0 | -0.00722638  | 0 | -0.078154812 | 0 | 0.076387418  |
| 0 | -0.000185307 | 0 | 0.047077496  | 0 | -0.052317425 | 0 | 0            | 0 | 0.014375905  |
| 0 | 0.031606808  | 0 | 0.032265825  | 0 | -0.031504329 | 0 | -0.039098457 | 0 | 0.034121633  |
| 0 | 0.031769904  | 0 | 0.032314695  | 0 | -0.031637316 | 0 | -0.038858161 | 0 | 0            |
| 0 | 0.04081476   | 0 | 0.018112748  | 0 | 0            | 0 | -0.038187797 | 0 | 0            |
| 0 | 0.040718664  | 0 | 0.018112484  | 0 | 0            | 0 | -0.038468666 | 0 | 0.022181188  |
| 0 | 0.051892318  | 0 | 0.021576993  | 0 | 0            | 0 | -0.039246278 | 0 | 0            |
| 0 | 0.03201247   | 0 | 0            | 0 | 0            | 0 | -0.037792932 | 0 | 0            |
| 0 | 0.031913722  | 0 | 0            | 0 | 0            | 0 | -0.03810053  | 0 | 0.024751113  |
| 0 | 0.050177752  | 0 | 0.033838756  | 0 | -0.026401852 | 0 | -0.047358745 | 0 | 0            |
| 0 | 0.053287574  | 0 | 0.026878455  | 0 | -0.010280057 | 0 | -0.037393917 | 0 | 0            |
| 0 | 0.032123682  | 0 | 0            | 0 | 0            | 0 | -0.036866431 | 0 | 0.012451421  |
| 0 | 0.031867643  | 0 | 0            | 0 | -0.000733157 | 0 | -0.036667912 | 0 | 0            |
| 0 | 0.031692975  | 0 | 0            | 0 | -0.000831925 | 0 | -0.037008733 | 0 | 0.027530615  |
| 0 | 0.038299664  | 0 | 0.015236343  | 0 | 0            | 0 | -0.056786985 | 0 | 0.024114699  |
| 0 | 0.038550281  | 0 | 0.015249075  | 0 | 0            | 0 | -0.056672396 | 0 | 0            |
| 0 | 0.038450099  | 0 | 0.015285678  | 0 | 0            | 0 | -0.055369661 | 0 | 0.029527986  |



|   |             |   |              |   |              |   |              |   |              |
|---|-------------|---|--------------|---|--------------|---|--------------|---|--------------|
| 0 | 0           | 0 | 0.027398253  | 0 | -0.043412717 | 0 | -0.035108917 | 0 | 0.059924304  |
| 0 | 0           | 0 | 0.027414799  | 0 | -0.043724111 | 0 | -0.034623198 | 0 | 0            |
| 0 | 0.024827318 | 0 | 0            | 0 | -0.013321955 | 0 | -0.046083801 | 0 | 0.033283947  |
| 0 | 0.025020847 | 0 | 0            | 0 | -0.013401092 | 0 | -0.045866648 | 0 | 0            |
| 0 | 0           | 0 | 0.030704772  | 0 | -0.050879047 | 0 | -0.037967737 | 0 | 0.064039053  |
| 0 | 0.02560023  | 0 | 0            | 0 | -0.012146912 | 0 | -0.044357048 | 0 | 0.027302422  |
| 0 | 0           | 0 | 0.030450576  | 0 | -0.050685353 | 0 | -0.037149532 | 0 | 0            |
| 0 | 0.047429689 | 0 | 0            | 0 | 0.010961013  | 0 | -0.037979237 | 0 | 0            |
| 0 | 0           | 0 | 0.025468881  | 0 | -0.040476603 | 0 | -0.031725215 | 0 | 0.046342125  |
| 0 | 0.031163502 | 0 | 0            | 0 | 0            | 0 | -0.053587389 | 0 | 0.029781208  |
| 0 | 0.031946637 | 0 | 0.02987907   | 0 | -0.030408131 | 0 | 0            | 0 | 0            |
| 0 | 0.032105607 | 0 | 0.029869013  | 0 | -0.030278914 | 0 | 0            | 0 | 0.031870328  |
| 0 | 0.040458062 | 0 | 0.016254719  | 0 | 0            | 0 | 0            | 0 | 0            |
| 0 | 0           | 0 | 0            | 0 | -0.022111266 | 0 | -0.037889564 | 0 | 0.055401486  |
| 0 | 0.040725334 | 0 | 0.016337336  | 0 | 0            | 0 | 0            | 0 | 0.018603934  |
| 0 | 0           | 0 | 0            | 0 | -0.024357319 | 0 | -0.039970528 | 0 | 0.04506362   |
| 0 | 0           | 0 | 0            | 0 | -0.022139304 | 0 | -0.037213743 | 0 | 0            |
| 0 | 0.04076286  | 0 | 0.016079728  | 0 | 0            | 0 | 0            | 0 | -0.02793069  |
| 0 | 0           | 0 | 0            | 0 | -0.022579771 | 0 | -0.036681141 | 0 | 0.045177173  |
| 0 | 0.050475442 | 0 | 0.02608745   | 0 | -0.01325299  | 0 | 0            | 0 | 0            |
| 0 | 0.021741046 | 0 | 0.040533784  | 0 | -0.060285941 | 0 | 0            | 0 | 0            |
| 0 | 0.021884776 | 0 | 0.040372234  | 0 | -0.059895766 | 0 | 0            | 0 | -0.000491163 |
| 0 | 0.021739785 | 0 | 0.040544966  | 0 | -0.060255167 | 0 | 0            | 0 | 0.044463918  |
| 0 | 0.032966716 | 0 | 0            | 0 | 0            | 0 | 0            | 0 | -0.026810465 |
| 0 | 0.031253249 | 0 | 0            | 0 | -0.002991475 | 0 | 0            | 0 | 0            |
| 0 | 0.031539656 | 0 | 0            | 0 | -0.002781573 | 0 | 0            | 0 | 0.024672804  |
| 0 | 0.030185154 | 0 | -0.002782178 | 0 | 0            | 0 | -0.038417198 | 0 | 0            |
| 0 | 0.030077472 | 0 | -0.002781511 | 0 | 0            | 0 | -0.038739304 | 0 | 0.026046746  |
| 0 | 0.029243619 | 0 | 0            | 0 | -0.004488821 | 0 | -0.038458152 | 0 | 0            |
| 0 | 0.029073594 | 0 | 0            | 0 | -0.004587454 | 0 | -0.038795772 | 0 | 0.027603063  |
| 0 | 0.031545348 | 0 | 0            | 0 | -0.003069299 | 0 | 0            | 0 | -0.022561175 |
| 0 | 0.031376305 | 0 | 0            | 0 | 0            | 0 | -0.038845848 | 0 | 0.010481794  |
| 0 | 0.029333257 | 0 | -0.001653108 | 0 | -0.003118142 | 0 | -0.037543066 | 0 | 0            |
| 0 | 0.029139428 | 0 | -0.001602473 | 0 | -0.003278109 | 0 | -0.037906653 | 0 | 0.029103395  |
| 0 | 0.029093528 | 0 | 0            | 0 | -0.00487753  | 0 | -0.037818311 | 0 | 0.014756303  |
| 0 | 0.030287038 | 0 | -0.002697117 | 0 | 0            | 0 | -0.037764849 | 0 | 0.012843428  |
| 0 | 0           | 0 | 0.002180989  | 0 | 0            | 0 | -0.039662416 | 0 | 0.054943201  |
| 0 | 0           | 0 | 0            | 0 | 0            | 0 | -0.039302372 | 0 | 0.043277177  |
| 0 | 0           | 0 | 0.002057534  | 0 | 0            | 0 | -0.038974472 | 0 | 0            |
| 0 | 0           | 0 | 0.029150412  | 0 | -0.051334899 | 0 | 0            | 0 | 0            |
| 0 | 0           | 0 | 0.02924958   | 0 | -0.051424536 | 0 | 0            | 0 | 0.060653334  |
| 0 | 0           | 0 | 0.00175098   | 0 | 0            | 0 | -0.038359435 | 0 | 0.046948393  |
| 0 | 0           | 0 | 0.029065253  | 0 | -0.051555661 | 0 | 0            | 0 | 0.017372257  |
| 0 | 0           | 0 | 0.035136971  | 0 | -0.064187608 | 0 | 0            | 0 | 0.018401362  |
| 0 | 0.045903171 | 0 | -0.004613234 | 0 | 0.011935418  | 0 | -0.03845964  | 0 | 0            |
| 0 | 0           | 0 | 0.00026929   | 0 | 0            | 0 | -0.053890218 | 0 | 0.061227034  |
| 0 | 0.016009262 | 0 | 0.001011604  | 0 | -0.029854723 | 0 | -0.053403832 | 0 | 0.044879476  |

|   |             |   |              |   |              |   |              |   |              |
|---|-------------|---|--------------|---|--------------|---|--------------|---|--------------|
| 0 | 0.01604444  | 0 | 0.001013227  | 0 | -0.029803406 | 0 | -0.053331948 | 0 | 0.043419499  |
| 0 | 0.01601431  | 0 | 0            | 0 | -0.028915026 | 0 | -0.053358326 | 0 | 0.044689777  |
| 0 | 0           | 0 | -0.001185807 | 0 | -0.023246837 | 0 | -0.038525434 | 0 | 0.05527524   |
| 0 | 0           | 0 | 0            | 0 | -0.024411045 | 0 | -0.038427289 | 0 | 0.042386758  |
| 0 | 0.016339197 | 0 | 0.000949787  | 0 | -0.029895451 | 0 | -0.053103655 | 0 | 0            |
| 0 | 0           | 0 | -0.001303572 | 0 | -0.023161653 | 0 | -0.037836411 | 0 | 0            |
| 0 | 0           | 0 | -0.000915611 | 0 | -0.023816575 | 0 | -0.037574667 | 0 | 0.044200574  |
| 0 | 0           | 0 | 0            | 0 | -0.024414157 | 0 | 0            | 0 | 0.007042166  |
| 0 | 0           | 0 | 0.000583251  | 0 | -0.035494219 | 0 | -0.048571003 | 0 | 0.055281965  |
| 0 | 0           | 0 | -0.011127614 | 0 | 0            | 0 | -0.038800194 | 0 | 0.039658841  |
| 0 | 0.028654935 | 0 | -0.003194095 | 0 | -0.004173225 | 0 | 0            | 0 | 0            |
| 0 | 0.030317134 | 0 | -0.004546189 | 0 | 0            | 0 | 0            | 0 | -0.025849062 |
| 0 | 0.028854825 | 0 | 0            | 0 | -0.007139853 | 0 | 0            | 0 | -0.023233126 |
| 0 | 0.028974345 | 0 | -0.003071665 | 0 | -0.004210195 | 0 | 0            | 0 | -0.022395494 |
| 0 | 0.028927611 | 0 | -0.003236744 | 0 | -0.003927225 | 0 | 0            | 0 | 0.02665595   |
| 0 | 0.013325178 | 0 | 0            | 0 | -0.038150434 | 0 | 0            | 0 | 0.000574908  |
| 0 | 0           | 0 | -3.77E-05    | 0 | 0            | 0 | 0            | 0 | 0.006406627  |
| 0 | 0.023295198 | 0 | -0.013872751 | 0 | 0            | 0 | -0.06643626  | 0 | 0.049351306  |
| 0 | 0           | 0 | -0.002559397 | 0 | -0.02429591  | 0 | 0            | 0 | 0.005770346  |
| 0 | 0.028635443 | 0 | 0.031265953  | 0 | -0.032805558 | 0 | -0.037051787 | 0 | 0.03363595   |
| 0 | 0.028792926 | 0 | 0.031312321  | 0 | -0.032934974 | 0 | -0.036810426 | 0 | 0            |
| 0 | 0.028628208 | 0 | 0.030883462  | 0 | -0.032931527 | 0 | -0.035619097 | 0 | 0.036671808  |
| 0 | 0.028931517 | 0 | 0.030788527  | 0 | -0.032684144 | 0 | -0.035162596 | 0 | 0            |
| 0 | 0.029824208 | 0 | 0.029557122  | 0 | -0.02947426  | 0 | -0.03391823  | 0 | 0.022717402  |
| 0 | 0.032457339 | 0 | 0.001688812  | 0 | 0            | 0 | 0            | 0 | -0.00821981  |
| 0 | 0.038076661 | 0 | 0.01637728   | 0 | 0            | 0 | -0.037031515 | 0 | 0            |
| 0 | 0.037983964 | 0 | 0.016376047  | 0 | 0            | 0 | -0.037296084 | 0 | 0.0212704    |
| 0 | 0.000120614 | 0 | 0.001965292  | 0 | -0.064211804 | 0 | 0            | 0 | 0.017119621  |
| 0 | 0.038003012 | 0 | 0.015891809  | 0 | 0            | 0 | -0.035789185 | 0 | 0.012710052  |
| 0 | 0.049216481 | 0 | 0.026770192  | 0 | -0.013757719 | 0 | -0.036618943 | 0 | 0            |
| 0 | 0           | 0 | 0.009366377  | 0 | -0.027631334 | 0 | -0.037122419 | 0 | 0            |
| 0 | 0           | 0 | 0.030500078  | 0 | -0.051623467 | 0 | -0.036802338 | 0 | 0.060963251  |
| 0 | 0.028091182 | 0 | 0            | 0 | -0.004272966 | 0 | -0.035756779 | 0 | 0.028032495  |
| 0 | 0.028279364 | 0 | 0            | 0 | -0.004163035 | 0 | -0.035412737 | 0 | 0            |
| 0 | 0.030235026 | 0 | 0            | 0 | 0            | 0 | -0.035773871 | 0 | 0.011074079  |
| 0 | 0           | 0 | 0.030261947  | 0 | -0.051435972 | 0 | -0.036038876 | 0 | 0            |
| 0 | 0.035999255 | 0 | 0.013649764  | 0 | 0            | 0 | -0.051837345 | 0 | 0.028608814  |
| 0 | 0           | 0 | 0.02552805   | 0 | -0.041564247 | 0 | -0.031033179 | 0 | 0.04287791   |
| 0 | 0.023220065 | 0 | 0            | 0 | -0.013450435 | 0 | -0.041357272 | 0 | 0.026311443  |
| 0 | 0.02800602  | 0 | 0            | 0 | -0.004868975 | 0 | -0.034322179 | 0 | 0.017279551  |
| 0 | 0           | 0 | 0.030196195  | 0 | -0.051918003 | 0 | -0.035373076 | 0 | 0.054963331  |
| 0 | 0.028412946 | 0 | 0.029570547  | 0 | -0.033527384 | 0 | 0            | 0 | 0            |
| 0 | 0.028533983 | 0 | 0.029569556  | 0 | -0.033433637 | 0 | 0            | 0 | 0.032956873  |
| 0 | 0.028505423 | 0 | 0.029345255  | 0 | -0.033633427 | 0 | 0            | 0 | -0.008612366 |
| 0 | 0           | 0 | 0            | 0 | -0.023526639 | 0 | -0.035482092 | 0 | 0.042736568  |
| 0 | 0.020713339 | 0 | 0.037557751  | 0 | -0.056287134 | 0 | 0            | 0 | 0.001011538  |
| 0 | 0.038068051 | 0 | 0.014340207  | 0 | 0            | 0 | 0            | 0 | -0.026222165 |

|   |             |   |              |   |              |   |              |              |
|---|-------------|---|--------------|---|--------------|---|--------------|--------------|
| 0 | 0.027983341 | 0 | 0            | 0 | -0.006503785 | 0 | 0            | -0.019268968 |
| 0 | 0           | 0 | 0.028837331  | 0 | -0.052289733 | 0 | 0            | 0.017169865  |
| 0 | 0           | 0 | 0.001137426  | 0 | 0            | 0 | -0.037248653 | 0.043975251  |
| 0 | 0.025299137 | 0 | -0.00364504  | 0 | -0.005266453 | 0 | -0.036282871 | 0.030114232  |
| 0 | 0.025510018 | 0 | -0.003698702 | 0 | -0.005085437 | 0 | -0.035918621 | 0            |
| 0 | 0.027127779 | 0 | -0.005398435 | 0 | 0            | 0 | -0.036193458 | 0.013484699  |
| 0 | 0.025173332 | 0 | 0            | 0 | -0.008904798 | 0 | -0.036309071 | 0.016958578  |
| 0 | 0.02527944  | 0 | -0.003312507 | 0 | -0.005947298 | 0 | -0.035090233 | 0.01666504   |
| 0 | 0.014124791 | 0 | -0.001126133 | 0 | -0.028472724 | 0 | -0.048878584 | 0.043836554  |
| 0 | 0           | 0 | -0.003018195 | 0 | -0.02309821  | 0 | -0.03602265  | 0.041766323  |
| 0 | 0.024487385 | 0 | 0.031971015  | 0 | -0.026633002 | 0 | -0.043920824 | 0.038973318  |
| 0 | 0.024708493 | 0 | 0.032024382  | 0 | -0.02676392  | 0 | -0.043654436 | 0            |
| 0 | 0.032615811 | 0 | 0.0204737    | 0 | 0            | 0 | -0.040983296 | 0.027997977  |
| 0 | 0.032761006 | 0 | 0.020482277  | 0 | 0            | 0 | -0.040630465 | 0            |
| 0 | 0.026944105 | 0 | 0.028869506  | 0 | -0.019555554 | 0 | -0.039284433 | 0.038917285  |
| 0 | 0.027294729 | 0 | 0.028741238  | 0 | -0.019220398 | 0 | -0.038796    | 0            |
| 0 | 0.025695248 | 0 | 0.030219769  | 0 | -0.023158875 | 0 | -0.040773149 | 0.030616302  |
| 0 | 0.032594025 | 0 | 0.019939354  | 0 | 0            | 0 | -0.039280737 | 0.016933948  |
| 0 | 0.025193054 | 0 | -0.004912587 | 0 | -0.006327995 | 0 | 0            | -0.018297901 |
| 0 | 0.030598392 | 0 | 0.017617542  | 0 | 0            | 0 | -0.05591932  | 0.035261444  |
| 0 | 0.026495653 | 0 | 0            | 0 | 0.007225204  | 0 | -0.039634941 | 0.030146342  |
| 0 | 0.026707326 | 0 | 0            | 0 | 0.007353864  | 0 | -0.039277763 | 0            |
| 0 | 0           | 0 | 0.028608601  | 0 | -0.037404396 | 0 | -0.040577551 | 0.061169274  |
| 0 | 0           | 0 | 0.027040702  | 0 | -0.034267715 | 0 | -0.038681405 | 0.048073709  |
| 0 | 0           | 0 | 0.028373062  | 0 | -0.037220721 | 0 | -0.039811723 | 0            |
| 0 | 0.022861714 | 0 | 0            | 0 | 0            | 0 | -0.039109102 | 0.018120568  |
| 0 | 0.048650076 | 0 | 0.024550083  | 0 | 0.000757271  | 0 | -0.040473736 | 0            |
| 0 | 0.026406259 | 0 | 0            | 0 | 0.006604418  | 0 | -0.038032117 | 0.019116627  |
| 0 | 0           | 0 | 0.02825416   | 0 | -0.037656918 | 0 | -0.038965841 | 0.054174977  |
| 0 | 0.01897328  | 0 | 0            | 0 | -0.006860712 | 0 | -0.048282029 | 0.034163883  |
| 0 | 0           | 0 | 0            | 0 | -0.011124456 | 0 | -0.039303272 | 0.042301738  |
| 0 | 0           | 0 | 0.007181922  | 0 | 0            | 0 | -0.040823967 | 0.045116896  |
| 0 | 0.026620978 | 0 | 0.027430361  | 0 | -0.020293592 | 0 | 0            | 0            |
| 0 | 0.026772389 | 0 | 0.027423462  | 0 | -0.020170383 | 0 | 0            | 0.034764755  |
| 0 | 0.026726654 | 0 | 0.02715379   | 0 | -0.020339149 | 0 | 0            | -0.010790253 |
| 0 | 0.032622466 | 0 | 0.018220455  | 0 | 0            | 0 | 0            | -0.023522634 |
| 0 | 0.026296423 | 0 | 0            | 0 | 0.00475231   | 0 | 0            | -0.021536115 |
| 0 | 0           | 0 | 0.026780245  | 0 | -0.038113427 | 0 | 0            | 0.012349187  |
| 0 | 0.014962096 | 0 | 0.039297926  | 0 | -0.054225192 | 0 | 0            | 0.004938182  |
| 0 | 0.023576674 | 0 | -0.006143931 | 0 | 0.008666424  | 0 | -0.04016252  | 0.031875102  |
| 0 | 0.023797846 | 0 | -0.006206285 | 0 | 0.0088568    | 0 | -0.039774946 | 0            |
| 0 | 0.026009643 | 0 | 0.026049107  | 0 | 0.00602735   | 0 | -0.048729751 | 0.036940521  |
| 0 | 0.026308232 | 0 | 0.025941034  | 0 | 0.006306157  | 0 | -0.048271828 | 0            |
| 0 | 0.020535653 | 0 | -0.003288938 | 0 | 0            | 0 | -0.03983776  | 0.020186007  |
| 0 | 0.02404527  | 0 | 0.029017517  | 0 | 0            | 0 | -0.048696496 | 0.02397808   |
| 0 | 0.023359696 | 0 | 0            | 0 | 0.002572411  | 0 | -0.040300025 | 0.017493255  |
| 0 | 0.02357567  | 0 | -0.005776093 | 0 | 0.007917358  | 0 | -0.038811846 | 0.018302482  |

|   |             |   |              |   |              |   |              |   |              |
|---|-------------|---|--------------|---|--------------|---|--------------|---|--------------|
| 0 | 0.025870395 | 0 | 0.025566941  | 0 | 0.006108814  | 0 | -0.046959387 | 0 | 0.026860945  |
| 0 | 0.017424672 | 0 | 0.03469921   | 0 | -0.01520711  | 0 | -0.059999588 | 0 | 0.046733385  |
| 0 | 0           | 0 | -0.005531454 | 0 | -0.008164418 | 0 | -0.039830147 | 0 | 0.040643415  |
| 0 | 0.02555179  | 0 | 0            | 0 | 0.028985292  | 0 | -0.047286616 | 0 | 0.015405868  |
| 0 | 0           | 0 | 0.025476212  | 0 | -0.011716167 | 0 | -0.048284662 | 0 | 0.048984714  |
| 0 | 0.008731154 | 0 | -0.002930113 | 0 | -0.02176008  | 0 | -0.05672176  | 0 | 0.053432498  |
| 0 | 0.023370498 | 0 | -0.007597197 | 0 | 0.007513489  | 0 | 0            | 0 | -0.021196439 |
| 0 | 0.025552311 | 0 | 0.023341321  | 0 | 0.008642146  | 0 | 0            | 0 | -0.024325912 |
| 0 | 0.022500105 | 0 | -0.009657584 | 0 | 0.034365416  | 0 | -0.047945543 | 0 | 0.015656399  |
| 0 | 0.030633868 | 0 | 0.033567891  | 0 | -0.034143601 | 0 | -0.041437843 | 0 | 0.033004576  |
| 0 | 0.030813913 | 0 | 0.033618642  | 0 | -0.034265306 | 0 | -0.041206498 | 0 | 0            |
| 0 | 0.032344719 | 0 | 0.031486515  | 0 | -0.029414755 | 0 | -0.038186284 | 0 | 0.033175231  |
| 0 | 0.031585423 | 0 | 0.032281598  | 0 | -0.031579297 | 0 | -0.038999757 | 0 | 0.023548575  |
| 0 | 0.032611918 | 0 | 0.031372462  | 0 | -0.029149693 | 0 | -0.037752605 | 0 | 0            |
| 0 | 0.0407657   | 0 | 0.018505699  | 0 | 0            | 0 | -0.03938624  | 0 | 0            |
| 0 | 0.04069485  | 0 | 0.018520767  | 0 | 0            | 0 | -0.039629236 | 0 | 0.019542012  |
| 0 | 0.040726411 | 0 | 0.018126072  | 0 | 0            | 0 | -0.038274683 | 0 | 0.011449753  |
| 0 | 0.051061272 | 0 | 0.027728025  | 0 | -0.011986961 | 0 | -0.039024455 | 0 | 0            |
| 0 | 0.031927905 | 0 | 0            | 0 | 0            | 0 | -0.037916595 | 0 | 0.009797757  |
| 0 | 0.031881306 | 0 | 0            | 0 | -0.000253674 | 0 | -0.037783846 | 0 | 0            |
| 0 | 0.031747765 | 0 | 0            | 0 | -0.000331729 | 0 | -0.038083935 | 0 | 0.024918675  |
| 0 | 0.031681042 | 0 | 0            | 0 | -0.000867785 | 0 | -0.036820486 | 0 | 0.014368818  |
| 0 | 0.038301938 | 0 | 0.015248643  | 0 | 0            | 0 | -0.056822334 | 0 | 0.029751285  |
| 0 | 0           | 0 | 0.030922944  | 0 | -0.05058507  | 0 | -0.0390642   | 0 | 0.061429425  |
| 0 | 0           | 0 | 0.030712478  | 0 | -0.050439873 | 0 | -0.038321942 | 0 | 0            |
| 0 | 0           | 0 | 0.027421931  | 0 | -0.043497812 | 0 | -0.034981974 | 0 | 0.045559311  |
| 0 | 0.024816153 | 0 | 0            | 0 | -0.013352421 | 0 | -0.046033397 | 0 | 0.027442833  |
| 0 | 0           | 0 | 0.030691388  | 0 | -0.050875018 | 0 | -0.037848702 | 0 | 0.054349614  |
| 0 | 0.031950232 | 0 | 0.030031933  | 0 | -0.030247498 | 0 | 0            | 0 | 0            |
| 0 | 0.032146492 | 0 | 0.030012708  | 0 | -0.03008672  | 0 | 0            | 0 | 0.029938103  |
| 0 | 0.032144119 | 0 | 0.029824569  | 0 | -0.030220153 | 0 | 0            | 0 | -0.015348785 |
| 0 | 0.040747959 | 0 | 0.016320604  | 0 | 0            | 0 | 0            | 0 | -0.030834964 |
| 0 | 0           | 0 | 0            | 0 | -0.022121937 | 0 | -0.037739637 | 0 | 0.042380165  |
| 0 | 0.021746591 | 0 | 0.040534154  | 0 | -0.060285341 | 0 | 0            | 0 | -0.000613179 |
| 0 | 0.031581669 | 0 | 0            | 0 | -0.002759541 | 0 | 0            | 0 | -0.025343366 |
| 0 | 0.029304648 | 0 | -0.001930632 | 0 | -0.002570103 | 0 | -0.038361138 | 0 | 0            |
| 0 | 0.029136961 | 0 | -0.001881101 | 0 | -0.002708315 | 0 | -0.038705931 | 0 | 0.027172396  |
| 0 | 0.030082949 | 0 | -0.002791101 | 0 | 0            | 0 | -0.038561192 | 0 | 0.011543527  |
| 0 | 0.029082858 | 0 | 0            | 0 | -0.004592646 | 0 | -0.038612141 | 0 | 0.012699235  |
| 0 | 0.029160115 | 0 | -0.001632404 | 0 | -0.003230784 | 0 | -0.037704537 | 0 | 0.014624906  |
| 0 | 0           | 0 | 0.002160114  | 0 | 0            | 0 | -0.039531389 | 0 | 0.043963106  |
| 0 | 0           | 0 | 0.029206245  | 0 | -0.051390711 | 0 | 0            | 0 | 0.014571005  |
| 0 | 0.016047213 | 0 | 0.001012982  | 0 | -0.029795317 | 0 | -0.053338156 | 0 | 0.044876759  |
| 0 | 0           | 0 | -0.001196807 | 0 | -0.023247763 | 0 | -0.038361527 | 0 | 0.042034236  |
| 0 | 0.028971916 | 0 | -0.00325833  | 0 | -0.003881804 | 0 | 0            | 0 | -0.024142956 |
| 0 | 0.028615613 | 0 | 0.031280177  | 0 | -0.032875921 | 0 | -0.036951861 | 0 | 0.022824159  |
| 0 | 0.028715369 | 0 | 0.031179406  | 0 | -0.032573288 | 0 | -0.036952968 | 0 | 0.033521767  |

|   |             |   |              |   |              |   |              |   |              |
|---|-------------|---|--------------|---|--------------|---|--------------|---|--------------|
| 0 | 0.029009229 | 0 | 0.031072933  | 0 | -0.032291221 | 0 | -0.03653666  | 0 | 0            |
| 0 | 0.028634519 | 0 | 0.030867773  | 0 | -0.032924266 | 0 | -0.035486026 | 0 | 0.025975566  |
| 0 | 0.037988921 | 0 | 0.016362695  | 0 | 0            | 0 | -0.03714628  | 0 | 0.009200923  |
| 0 | 0           | 0 | 0.030486079  | 0 | -0.051618516 | 0 | -0.036686783 | 0 | 0.051632406  |
| 0 | 0.028101262 | 0 | 0            | 0 | -0.004279596 | 0 | -0.035583932 | 0 | 0.014013239  |
| 0 | 0.02857012  | 0 | 0.029527809  | 0 | -0.033376762 | 0 | 0            | 0 | -0.012255371 |
| 0 | 0.025352248 | 0 | -0.003654744 | 0 | -0.005215426 | 0 | -0.036043404 | 0 | 0.014780592  |
| 0 | 0.027061641 | 0 | 0.029220621  | 0 | -0.019229015 | 0 | -0.04078169  | 0 | 0.035312168  |
| 0 | 0.027358783 | 0 | 0.029118334  | 0 | -0.018954883 | 0 | -0.04034358  | 0 | 0            |
| 0 | 0.024472156 | 0 | 0.03198156   | 0 | -0.026686664 | 0 | -0.043843852 | 0 | 0.030676149  |
| 0 | 0.0326218   | 0 | 0.020460742  | 0 | 0            | 0 | -0.040826066 | 0 | 0.015300172  |
| 0 | 0.026952508 | 0 | 0.02885182   | 0 | -0.01954368  | 0 | -0.03913922  | 0 | 0.027200289  |
| 0 | 0.026514027 | 0 | 0            | 0 | 0.007226891  | 0 | -0.039462392 | 0 | 0.015199343  |
| 0 | 0           | 0 | 0.028593139  | 0 | -0.03739948  | 0 | -0.040447854 | 0 | 0.050697702  |
| 0 | 0.026813874 | 0 | 0.027377962  | 0 | -0.020107891 | 0 | 0            | 0 | -0.015021033 |
| 0 | 0.02358679  | 0 | -0.006156317 | 0 | 0.008669032  | 0 | -0.039972462 | 0 | 0.016726767  |
| 0 | 0.026024766 | 0 | 0.026030295  | 0 | 0.006040459  | 0 | -0.048547417 | 0 | 0.022405156  |
| 0 | 0.03239284  | 0 | 0.031729393  | 0 | -0.029120034 | 0 | -0.039305224 | 0 | 0.030496143  |
| 0 | 0.03263776  | 0 | 0.031637885  | 0 | -0.028886792 | 0 | -0.038928981 | 0 | 0            |
| 0 | 0.030629402 | 0 | 0.033616595  | 0 | -0.03423102  | 0 | -0.041354745 | 0 | 0.023732654  |
| 0 | 0.032338763 | 0 | 0.031460326  | 0 | -0.029405614 | 0 | -0.038025051 | 0 | 0.02161211   |
| 0 | 0.040702372 | 0 | 0.018494664  | 0 | 0            | 0 | -0.039470235 | 0 | 0.006778752  |
| 0 | 0.031759285 | 0 | 0            | 0 | -0.000336868 | 0 | -0.037900118 | 0 | 0.009960967  |
| 0 | 0           | 0 | 0.030929926  | 0 | -0.050633357 | 0 | -0.03896075  | 0 | 0.051364656  |
| 0 | 0.032185091 | 0 | 0.029969278  | 0 | -0.03002587  | 0 | 0            | 0 | -0.018239645 |
| 0 | 0.029149945 | 0 | -0.001897614 | 0 | -0.002700331 | 0 | -0.038510717 | 0 | 0.012142397  |
| 0 | 0.028723509 | 0 | 0.031163513  | 0 | -0.032562584 | 0 | -0.036816894 | 0 | 0.022509054  |
| 0 | 0.027069877 | 0 | 0.029201327  | 0 | -0.019217111 | 0 | -0.040633715 | 0 | 0.023239399  |
| 0 | 0.032438813 | 0 | 0.031689335  | 0 | -0.029055424 | 0 | -0.039113442 | 0 | 0.016653076  |





|   |             |   |              |   |              |   |              |
|---|-------------|---|--------------|---|--------------|---|--------------|
| 0 | 0.060506346 | 0 | 0            | 0 | 0            | 0 | 0            |
| 0 | 0           | 0 | 0            | 0 | -0.070509004 | 0 | 0            |
| 0 | 0           | 0 | 0            | 0 | -0.052983651 | 0 | 0            |
| 0 | 0           | 0 | 0            | 0 | -0.065273569 | 0 | 0            |
| 0 | 0.060257605 | 0 | 0            | 0 | 0            | 0 | 0            |
| 0 | 0           | 0 | 0            | 0 | 0            | 0 | 0            |
| 0 | 0           | 0 | 0            | 0 | -0.093597858 | 0 | 0            |
| 0 | 0           | 0 | 0            | 0 | -0.059659635 | 0 | 0            |
| 0 | 0           | 0 | 0            | 0 | -0.051211185 | 0 | 0            |
| 0 | 0           | 0 | 0            | 0 | -0.059707812 | 0 | 0            |
| 0 | 0           | 0 | 0            | 0 | -0.053340343 | 0 | -0.018233269 |
| 0 | 0           | 0 | 0            | 0 | -0.064133757 | 0 | 0            |
| 0 | 0.059171076 | 0 | -0.044578437 | 0 | 0            | 0 | 0            |
| 0 | 0           | 0 | -0.044670054 | 0 | 0            | 0 | 0            |
| 0 | 0           | 0 | 0            | 0 | 0            | 0 | 0            |
| 0 | 0           | 0 | -0.058094418 | 0 | 0            | 0 | 0            |
| 0 | 0           | 0 | 0            | 0 | 0            | 0 | 0            |
| 0 | 0           | 0 | 0            | 0 | 0            | 0 | 0            |
| 0 | 0.060770449 | 0 | 0            | 0 | 0            | 0 | 0            |
| 0 | 0.062624143 | 0 | 0            | 0 | 0            | 0 | 0            |
| 0 | 0           | 0 | 0            | 0 | 0            | 0 | 0            |
| 0 | 0           | 0 | 0            | 0 | 0            | 0 | 0.003026498  |
| 0 | -0.02338756 | 0 | 0            | 0 | 0            | 0 | 0            |
| 0 | 0.058031953 | 0 | 0            | 0 | 0            | 0 | 0            |
| 0 | 0.063264275 | 0 | 0            | 0 | 0            | 0 | 0.003068881  |
| 0 | 0.058952519 | 0 | 0            | 0 | 0            | 0 | 0            |
| 0 | 0.059369828 | 0 | -0.068724553 | 0 | 0            | 0 | 0            |
| 0 | 0           | 0 | 0            | 0 | 0            | 0 | 0            |
| 0 | 0.057361506 | 0 | 0            | 0 | 0            | 0 | -0.006560836 |
| 0 | 0           | 0 | -0.068812872 | 0 | 0            | 0 | 0            |
| 0 | 0.05372681  | 0 | 0            | 0 | 0            | 0 | 0            |
| 0 | 0           | 0 | 0            | 0 | 0            | 0 | -0.006520005 |
| 0 | 0           | 0 | 0            | 0 | 0            | 0 | 0            |
| 0 | 0.059447341 | 0 | 0            | 0 | 0            | 0 | 0            |
| 0 | 0.062210622 | 0 | 0            | 0 | 0            | 0 | 0            |
| 0 | 0           | 0 | 0            | 0 | 0            | 0 | 0            |
| 0 | 0           | 0 | -0.036588764 | 0 | 0            | 0 | 0            |
| 0 | 0           | 0 | 0            | 0 | -0.052789115 | 0 | -0.0077686   |
| 0 | 0           | 0 | 0            | 0 | 0            | 0 | 0            |
| 0 | 0           | 0 | 0            | 0 | 0            | 0 | 0            |
| 0 | 0           | 0 | 0            | 0 | -0.084829222 | 0 | 0            |
| 0 | 0           | 0 | 0            | 0 | 0            | 0 | 0            |
| 0 | 0           | 0 | 0            | 0 | -0.086066098 | 0 | -0.002377053 |
| 0 | 0           | 0 | -0.039210911 | 0 | 0            | 0 | 0            |
| 0 | 0           | 0 | 0            | 0 | -0.066445334 | 0 | 0            |
| 0 | 0           | 0 | -0.036901796 | 0 | 0            | 0 | 0            |
| 0 | 0           | 0 | 0.16957471   | 0 | -0.25245898  | 0 | 0            |



|   |             |   |              |   |              |   |              |   |
|---|-------------|---|--------------|---|--------------|---|--------------|---|
| 0 | 0.048176099 | 0 | 0            | 0 | -0.082759993 | 0 | 0            | 0 |
| 0 | 0           | 0 | 0            | 0 | -0.082833538 | 0 | 0            | 0 |
| 0 | 0           | 0 | -0.039456346 | 0 | 0            | 0 | -0.019144552 | 0 |
| 0 | 0           | 0 | -0.044826843 | 0 | 0            | 0 | 0            | 0 |
| 0 | 0           | 0 | -0.048407874 | 0 | 0            | 0 | 0            | 0 |
| 0 | 0           | 0 | -0.044753298 | 0 | 0            | 0 | 0            | 0 |
| 0 | 0           | 0 | 0            | 0 | -0.06103115  | 0 | 0.001523234  | 0 |
| 0 | 0           | 0 | -0.055981758 | 0 | 0            | 0 | 0            | 0 |
| 0 | 0           | 0 | 0            | 0 | 0            | 0 | -0.019966904 | 0 |
| 0 | 0.063824453 | 0 | 0            | 0 | 0            | 0 | 0            | 0 |
| 0 | 0           | 0 | 0            | 0 | 0            | 0 | 0            | 0 |
| 0 | 0           | 0 | 0            | 0 | 0            | 0 | -0.013319096 | 0 |
| 0 | 0           | 0 | -0.045194655 | 0 | 0            | 0 | 0            | 0 |
| 0 | 0           | 0 | 0            | 0 | 0            | 0 | 0            | 0 |
| 0 | 0           | 0 | 0            | 0 | 0            | 0 | 0            | 0 |
| 0 | 0           | 0 | 0            | 0 | 0            | 0 | 0            | 0 |
| 0 | 0           | 0 | 0            | 0 | 0            | 0 | 0            | 0 |
| 0 | 0           | 0 | 0            | 0 | 0            | 0 | -0.023459712 | 0 |
| 0 | 0           | 0 | 0            | 0 | 0            | 0 | 0            | 0 |
| 0 | 0           | 0 | -0.038850781 | 0 | 0            | 0 | -0.008522067 | 0 |
| 0 | 0           | 0 | 0            | 0 | 0            | 0 | -0.002287389 | 0 |
| 0 | 0.068141542 | 0 | 0            | 0 | 0            | 0 | 0.015801973  | 0 |
| 0 | 0           | 0 | 0            | 0 | 0            | 0 | 0.015850757  | 0 |
| 0 | 0           | 0 | 0            | 0 | 0            | 0 | 0            | 0 |
| 0 | 0           | 0 | 0            | 0 | 0            | 0 | -0.023048513 | 0 |
| 0 | 0           | 0 | 0            | 0 | -0.093216901 | 0 | 0            | 0 |
| 0 | 0.064572919 | 0 | 0            | 0 | 0            | 0 | 0            | 0 |
| 0 | 0           | 0 | 0            | 0 | 0            | 0 | 0            | 0 |
| 0 | 0.06190896  | 0 | 0            | 0 | 0            | 0 | 0            | 0 |
| 0 | 0.057381725 | 0 | 0            | 0 | 0            | 0 | 0            | 0 |
| 0 | 0           | 0 | 0            | 0 | 0            | 0 | 0            | 0 |
| 0 | 0           | 0 | -0.080014932 | 0 | 0            | 0 | 0            | 0 |
| 0 | 0           | 0 | 0            | 0 | 0            | 0 | 0            | 0 |
| 0 | 0           | 0 | 0            | 0 | 0            | 0 | 0            | 0 |
| 0 | 0           | 0 | 0            | 0 | 0            | 0 | 0            | 0 |
| 0 | 0           | 0 | 0            | 0 | 0            | 0 | 0            | 0 |
| 0 | 0           | 0 | -0.052535389 | 0 | 0            | 0 | 0            | 0 |
| 0 | 0           | 0 | 0            | 0 | -0.081247273 | 0 | 0.014403304  | 0 |
| 0 | 0           | 0 | 0            | 0 | 0            | 0 | -0.020553769 | 0 |
| 0 | 0           | 0 | -0.048494359 | 0 | 0            | 0 | 0.001336363  | 0 |
| 0 | 0           | 0 | 0            | 0 | 0            | 0 | 0            | 0 |
| 0 | 0           | 0 | 0            | 0 | 0            | 0 | -0.020546779 | 0 |
| 0 | 0           | 0 | 0            | 0 | 0            | 0 | -0.011561776 | 0 |
| 0 | 0           | 0 | -0.072433142 | 0 | 0            | 0 | 0            | 0 |
| 0 | 0.049526387 | 0 | -0.071243692 | 0 | 0            | 0 | 0            | 0 |
| 0 | 0           | 0 | 0            | 0 | 0            | 0 | 0            | 0 |
| 0 | 0           | 0 | -0.071320251 | 0 | 0            | 0 | 0            | 0 |

|   |             |   |              |   |              |   |              |   |
|---|-------------|---|--------------|---|--------------|---|--------------|---|
| 0 | 0           | 0 | -0.072854221 | 0 | 0            | 0 | 0.000345151  | 0 |
| 0 | 0           | 0 | 0            | 0 | 0            | 0 | -0.011898295 | 0 |
| 0 | 0           | 0 | 0            | 0 | -0.071768063 | 0 | 0.050839651  | 0 |
| 0 | 0.074434598 | 0 | 0            | 0 | -0.071695853 | 0 | 0.050809982  | 0 |
| 0 | 0           | 0 | 0            | 0 | 0            | 0 | 0            | 0 |
| 0 | 0           | 0 | 0            | 0 | 0            | 0 | 0            | 0 |
| 0 | 0           | 0 | 0            | 0 | 0            | 0 | 0.011301728  | 0 |
| 0 | 0           | 0 | 0            | 0 | -0.090868967 | 0 | 0.050784457  | 0 |
| 0 | 0           | 0 | 0            | 0 | 0            | 0 | 0            | 0 |
| 0 | 0           | 0 | -0.080447949 | 0 | 0            | 0 | 0            | 0 |
| 0 | 0           | 0 | -0.068925619 | 0 | 0            | 0 | 0.016035295  | 0 |
| 0 | 0           | 0 | 0            | 0 | 0            | 0 | -0.003169114 | 0 |
| 0 | 0.1078799   | 0 | 0            | 0 | 0            | 0 | 0            | 0 |
| 0 | 0           | 0 | 0            | 0 | 0            | 0 | 0            | 0 |
| 0 | 0           | 0 | -0.059598481 | 0 | 0            | 0 | 0.052444122  | 0 |
| 0 | 0.076284231 | 0 | -0.059523071 | 0 | 0            | 0 | 0.05241683   | 0 |
| 0 | 0.075395257 | 0 | 0            | 0 | 0            | 0 | 0.030149846  | 0 |
| 0 | 0           | 0 | 0            | 0 | 0            | 0 | 0.030237975  | 0 |
| 0 | 0           | 0 | 0            | 0 | 0            | 0 | 0.00446264   | 0 |
| 0 | 0           | 0 | 0.17035009   | 0 | -0.24676074  | 0 | 0.047494208  | 0 |
| 0 | 0           | 0 | -0.077615151 | 0 | 0            | 0 | 0.051632742  | 0 |
| 0 | 0.066332941 | 0 | 0            | 0 | 0            | 0 | 0            | 0 |
| 0 | 0.072201695 | 0 | 0            | 0 | 0            | 0 | 0            | 0 |
| 0 | 0           | 0 | 0            | 0 | 0            | 0 | 0            | 0 |
| 0 | 0.07211112  | 0 | 0            | 0 | 0            | 0 | 0.042993026  | 0 |
| 0 | 0           | 0 | 0            | 0 | 0            | 0 | 0.043063478  | 0 |
| 0 | 0.094665505 | 0 | 0            | 0 | 0            | 0 | 0            | 0 |
| 0 | 0           | 0 | 0            | 0 | 0            | 0 | 0            | 0 |
| 0 | 0           | 0 | 0.13289585   | 0 | -0.225636    | 0 | 0            | 0 |
| 0 | 0.059942448 | 0 | 0.13293466   | 0 | -0.22560231  | 0 | 0            | 0 |
| 0 | 0           | 0 | 0.13428778   | 0 | -0.24208997  | 0 | 0            | 0 |
| 0 | 0           | 0 | 0            | 0 | 0            | 0 | 0.026227707  | 0 |
| 0 | 0.094560454 | 0 | 0            | 0 | 0            | 0 | 0.065368004  | 0 |
| 0 | 0           | 0 | 0            | 0 | 0            | 0 | 0.065375591  | 0 |
| 0 | 0.050153525 | 0 | 0            | 0 | 0            | 0 | 0.066396032  | 0 |
| 0 | 0.042435233 | 0 | 0            | 0 | -0.10047858  | 0 | 0            | 0 |
| 0 | 0           | 0 | 0            | 0 | -0.10049291  | 0 | 0            | 0 |
| 0 | 0           | 0 | 0            | 0 | 0            | 0 | 0.019618139  | 0 |
| 0 | 0.027812525 | 0 | 0            | 0 | -0.09448103  | 0 | 0            | 0 |
| 0 | 0.07078698  | 0 | 0            | 0 | 0            | 0 | 0            | 0 |
| 0 | 0           | 0 | 0            | 0 | 0            | 0 | 0            | 0 |
| 0 | 0           | 0 | 0            | 0 | 0            | 0 | 0.038232637  | 0 |
| 0 | 0.050519207 | 0 | -0.087755706 | 0 | 0            | 0 | 0            | 0 |
| 0 | 0           | 0 | -0.08776603  | 0 | 0            | 0 | 0            | 0 |
| 0 | 0.03105425  | 0 | -0.084293961 | 0 | 0            | 0 | 0            | 0 |
| 0 | 0           | 0 | 0.20794219   | 0 | -0.26682766  | 0 | 0            | 0 |
| 0 | 0.055366876 | 0 | 0.20385393   | 0 | -0.24857494  | 0 | 0            | 0 |

|   |             |   |            |   |              |   |              |   |
|---|-------------|---|------------|---|--------------|---|--------------|---|
| 0 | 0           | 0 | 0.20498753 | 0 | -0.26271303  | 0 | 0            | 0 |
| 0 | 0           | 0 | 0.20378291 | 0 | -0.24860413  | 0 | 0            | 0 |
| 0 | 0           | 0 | 0.20163896 | 0 | -0.24462699  | 0 | 0            | 0 |
| 0 | 0.058039606 | 0 | 0.20157401 | 0 | -0.24459009  | 0 | 0            | 0 |
| 0 | 0.058035037 | 0 | 0.19075963 | 0 | -0.26852529  | 0 | 0            | 0 |
| 0 | 0           | 0 | 0.19069284 | 0 | -0.26854531  | 0 | 0            | 0 |
| 0 | 0           | 0 | 0.18203591 | 0 | -0.24984272  | 0 | 0            | 0 |
| 0 | 0           | 0 | 0          | 0 | -0.061246789 | 0 | 0            | 0 |
| 0 | 0.058094078 | 0 | 0.17886308 | 0 | -0.23177542  | 0 | 0            | 0 |
| 0 | 0           | 0 | 0.17880866 | 0 | -0.23181159  | 0 | 0            | 0 |
| 0 | 0           | 0 | 0          | 0 | -0.04656552  | 0 | 0            | 0 |
| 0 | 0.057620888 | 0 | 0          | 0 | -0.046561792 | 0 | 0            | 0 |
| 0 | 0           | 0 | 0          | 0 | -0.063735801 | 0 | 0            | 0 |
| 0 | 0           | 0 | 0.19988074 | 0 | -0.24445897  | 0 | 0            | 0 |
| 0 | 0.057629993 | 0 | 0          | 0 | -0.06641448  | 0 | 0            | 0 |
| 0 | 0           | 0 | 0          | 0 | -0.066496399 | 0 | 0            | 0 |
| 0 | 0           | 0 | 0          | 0 | -0.061050932 | 0 | 0            | 0 |
| 0 | 0           | 0 | 0          | 0 | -0.06184219  | 0 | 0            | 0 |
| 0 | 0.057680969 | 0 | 0          | 0 | -0.061182938 | 0 | 0            | 0 |
| 0 | 0           | 0 | 0.20256253 | 0 | -0.26202392  | 0 | 0            | 0 |
| 0 | 0           | 0 | 0.20057291 | 0 | -0.2477108   | 0 | 0            | 0 |
| 0 | 0           | 0 | 0.20664635 | 0 | -0.25153948  | 0 | 0            | 0 |
| 0 | 0.056112269 | 0 | 0          | 0 | -0.049455201 | 0 | 0            | 0 |
| 0 | 0           | 0 | 0          | 0 | -0.04955188  | 0 | 0            | 0 |
| 0 | 0.050872936 | 0 | 0          | 0 | 0            | 0 | 0            | 0 |
| 0 | 0           | 0 | 0.19937214 | 0 | -0.25292338  | 0 | 0            | 0 |
| 0 | 0.02684064  | 0 | 0          | 0 | -0.059739073 | 0 | 0            | 0 |
| 0 | 0           | 0 | 0          | 0 | -0.0598389   | 0 | 0            | 0 |
| 0 | 0           | 0 | 0.20132407 | 0 | -0.25464462  | 0 | 0            | 0 |
| 0 | 0           | 0 | 0.192043   | 0 | -0.2589237   | 0 | 0            | 0 |
| 0 | 0           | 0 | 0          | 0 | -0.047490514 | 0 | 0            | 0 |
| 0 | 0.056378751 | 0 | 0          | 0 | -0.04747148  | 0 | 0            | 0 |
| 0 | 0           | 0 | 0.20216187 | 0 | -0.24957918  | 0 | -0.01700407  | 0 |
| 0 | 0           | 0 | 0.20252577 | 0 | -0.26007707  | 0 | 0            | 0 |
| 0 | 0           | 0 | 0.18947638 | 0 | -0.27968704  | 0 | 0            | 0 |
| 0 | 0           | 0 | 0          | 0 | -0.054367378 | 0 | 0            | 0 |
| 0 | 0           | 0 | 0          | 0 | -0.064138691 | 0 | -0.007599147 | 0 |
| 0 | 0.056240658 | 0 | 0          | 0 | -0.061705537 | 0 | 0            | 0 |
| 0 | 0           | 0 | 0          | 0 | -0.061801366 | 0 | 0            | 0 |
| 0 | 0.054143978 | 0 | 0          | 0 | -0.05444647  | 0 | 0            | 0 |
| 0 | 0           | 0 | 0          | 0 | -0.057230457 | 0 | 0            | 0 |
| 0 | 0           | 0 | 0          | 0 | -0.065609262 | 0 | 0            | 0 |
| 0 | 0.031932787 | 0 | 0          | 0 | -0.057386259 | 0 | 0            | 0 |
| 0 | 0           | 0 | 0          | 0 | -0.063723706 | 0 | 0            | 0 |
| 0 | 0           | 0 | 0          | 0 | -0.069693241 | 0 | 0            | 0 |
| 0 | 0.053145153 | 0 | 0          | 0 | -0.054853823 | 0 | 0            | 0 |
| 0 | 0           | 0 | 0          | 0 | -0.054941477 | 0 | 0            | 0 |

|   |              |   |              |   |              |   |              |   |
|---|--------------|---|--------------|---|--------------|---|--------------|---|
| 0 | 0            | 0 | 0            | 0 | -0.077067439 | 0 | 0            | 0 |
| 0 | 0            | 0 | 0            | 0 | -0.066076736 | 0 | 0            | 0 |
| 0 | 0            | 0 | -0.032629833 | 0 | 0            | 0 | 0            | 0 |
| 0 | 0.053637321  | 0 | 0            | 0 | -0.050622015 | 0 | -0.00520788  | 0 |
| 0 | 0.058928034  | 0 | -0.032629644 | 0 | 0            | 0 | 0            | 0 |
| 0 | 0            | 0 | 0            | 0 | -0.050718522 | 0 | -0.005141418 | 0 |
| 0 | 0.044814715  | 0 | 0            | 0 | -0.050768495 | 0 | 0            | 0 |
| 0 | 0            | 0 | 0            | 0 | -0.06381818  | 0 | 0.001940058  | 0 |
| 0 | 0            | 0 | 0            | 0 | -0.049077394 | 0 | 0.003590254  | 0 |
| 0 | -0.025883879 | 0 | 0            | 0 | -0.049038283 | 0 | 0            | 0 |
| 0 | 0.058987846  | 0 | 0            | 0 | -0.049101974 | 0 | 0.00362482   | 0 |
| 0 | 0            | 0 | -0.046057645 | 0 | 0            | 0 | 0            | 0 |
| 0 | 0            | 0 | 0.19996484   | 0 | -0.24683611  | 0 | -0.006076156 | 0 |
| 0 | 0.030424081  | 0 | 0            | 0 | -0.065892272 | 0 | 0            | 0 |
| 0 | 0            | 0 | 0            | 0 | -0.065967512 | 0 | 0            | 0 |
| 0 | 0.060445097  | 0 | 0            | 0 | -0.078471444 | 0 | 0.008401366  | 0 |
| 0 | 0            | 0 | 0            | 0 | -0.078538255 | 0 | 0.008463597  | 0 |
| 0 | 0.061077093  | 0 | 0            | 0 | -0.079951154 | 0 | 0            | 0 |
| 0 | 0.043794345  | 0 | 0            | 0 | -0.081149143 | 0 | 0            | 0 |
| 0 | 0.05786244   | 0 | 0            | 0 | -0.081134217 | 0 | 0            | 0 |
| 0 | 0            | 0 | 0            | 0 | -0.079983331 | 0 | 0            | 0 |
| 0 | 0            | 0 | 0            | 0 | -0.081219601 | 0 | 0            | 0 |
| 0 | 0            | 0 | 0            | 0 | -0.071678516 | 0 | 0.010277121  | 0 |
| 0 | 0.057360126  | 0 | -0.035730698 | 0 | 0            | 0 | 0            | 0 |
| 0 | 0            | 0 | -0.03583241  | 0 | 0            | 0 | 0            | 0 |
| 0 | 0            | 0 | -0.048711781 | 0 | 0            | 0 | 0            | 0 |
| 0 | 0            | 0 | -0.033203804 | 0 | 0            | 0 | 0            | 0 |
| 0 | 0.057700432  | 0 | -0.033183005 | 0 | 0            | 0 | 0            | 0 |
| 0 | 0            | 0 | 0            | 0 | -0.071267237 | 0 | 0            | 0 |
| 0 | 0.061589945  | 0 | 0            | 0 | -0.056059601 | 0 | 0.01199192   | 0 |
| 0 | 0            | 0 | 0            | 0 | -0.056147011 | 0 | 0.012046484  | 0 |
| 0 | 0            | 0 | -0.044213238 | 0 | 0            | 0 | 0            | 0 |
| 0 | 0            | 0 | 0.18900337   | 0 | -0.2706001   | 0 | 0            | 0 |
| 0 | 0.059105641  | 0 | -0.04434857  | 0 | 0            | 0 | 0            | 0 |
| 0 | 0.055818417  | 0 | 0            | 0 | -0.06019821  | 0 | 0            | 0 |
| 0 | 0            | 0 | 0            | 0 | -0.060268683 | 0 | 0            | 0 |
| 0 | 0            | 0 | 0.19015727   | 0 | -0.27214024  | 0 | 0.000139247  | 0 |
| 0 | 0            | 0 | -0.04625753  | 0 | 0            | 0 | 0            | 0 |
| 0 | 0            | 0 | 0            | 0 | 0            | 0 | 0            | 0 |
| 0 | 0.059024738  | 0 | -0.05192329  | 0 | 0            | 0 | 0            | 0 |
| 0 | 0            | 0 | -0.052009201 | 0 | 0            | 0 | 0            | 0 |
| 0 | 0.064227271  | 0 | 0            | 0 | 0            | 0 | 0            | 0 |
| 0 | 0.0386992    | 0 | 0            | 0 | -0.057109574 | 0 | 0            | 0 |
| 0 | 0.035138643  | 0 | -0.043237482 | 0 | 0            | 0 | 0            | 0 |
| 0 | 0            | 0 | -0.043337813 | 0 | 0            | 0 | 0            | 0 |
| 0 | 0            | 0 | 0            | 0 | 0            | 0 | 0            | 0 |
| 0 | 0            | 0 | -0.039467324 | 0 | 0            | 0 | 0            | 0 |

|   |              |   |              |   |              |              |              |
|---|--------------|---|--------------|---|--------------|--------------|--------------|
| 0 | 0.061128476  | 0 | 0            | 0 | 0            | 0            | 0            |
| 0 | 0.056047573  | 0 | -0.039552639 | 0 | 0            | 0            | 0            |
| 0 | 0            | 0 | 0            | 0 | 0            | -0.007378883 | 0            |
| 0 | 0            | 0 | 0            | 0 | 0            | 0            | 0            |
| 0 | 0.059493297  | 0 | 0            | 0 | 0            | -0.007365725 | 0            |
| 0 | 0.054596782  | 0 | 0            | 0 | 0            | 0            | 0            |
| 0 | 0            | 0 | 0            | 0 | 0            | 0            | 0            |
| 0 | 0.00443047   | 0 | 0            | 0 | 0            | 0            | 0            |
| 0 | 0.061734593  | 0 | 0            | 0 | 0            | 0            | 0            |
| 0 | 0            | 0 | -0.040691076 | 0 | 0            | 0            | 0            |
| 0 | 0            | 0 | 0.17916734   | 0 | -0.24160866  | 0            | 0            |
| 0 | 0.04021148   | 0 | -0.040859005 | 0 | 0            | 0            | 0            |
| 0 | 0            | 0 | 0            | 0 | -0.059077884 | 0            | 0            |
| 0 | 0            | 0 | 0            | 0 | -0.049564633 | 0            | -0.017570811 |
| 0 | 0.054968089  | 0 | -0.039850995 | 0 | 0            | 0            | 0            |
| 0 | 0.057142588  | 0 | -0.04286146  | 0 | 0            | 0            | 0            |
| 0 | 0            | 0 | -0.039945369 | 0 | 0            | 0            | 0            |
| 0 | 0            | 0 | -0.042961218 | 0 | 0            | 0            | 0            |
| 0 | 0.054662349  | 0 | -0.036693603 | 0 | 0            | -0.005849199 | 0            |
| 0 | 0            | 0 | -0.036794063 | 0 | 0            | -0.005789578 | 0            |
| 0 | 0.049435763  | 0 | -0.03681085  | 0 | 0            | 0            | 0            |
| 0 | 0            | 0 | -0.044358365 | 0 | 0            | 0            | 0            |
| 0 | 0            | 0 | -0.04880385  | 0 | 0            | -0.009449173 | 0            |
| 0 | 0            | 0 | 0            | 0 | -0.051953681 | 0            | -0.020496586 |
| 0 | 0            | 0 | -0.03502503  | 0 | 0            | 0.00309752   | 0            |
| 0 | 0            | 0 | 0            | 0 | -0.050149847 | 0            | 0            |
| 0 | -0.024720417 | 0 | -0.035023706 | 0 | 0            | 0            | 0            |
| 0 | 0.060172933  | 0 | -0.035052398 | 0 | 0            | 0.003134522  | 0            |
| 0 | 0            | 0 | 0            | 0 | -0.05372413  | 0            | 0            |
| 0 | 0            | 0 | 0            | 0 | 0            | 0            | 0            |
| 0 | 0            | 0 | -0.049786779 | 0 | 0            | 0            | 0            |
| 0 | 0            | 0 | 0.17997447   | 0 | -0.23661877  | 0            | 0.004692911  |
| 0 | 0.047903794  | 0 | 0.168627     | 0 | -0.24859818  | 0            | 0            |
| 0 | 0            | 0 | 0.16857499   | 0 | -0.24862083  | 0            | 0            |
| 0 | 0            | 0 | 0            | 0 | -0.049970254 | 0            | -0.020564806 |
| 0 | 0            | 0 | 0            | 0 | -0.062078591 | 0            | 0            |
| 0 | 0            | 0 | 0            | 0 | -0.066249859 | 0            | -0.015076346 |
| 0 | 0            | 0 | 0            | 0 | -0.056560452 | 0            | 0            |
| 0 | 0            | 0 | 0            | 0 | -0.072471591 | 0            | -0.01241626  |
| 0 | 0            | 0 | -0.05039325  | 0 | 0            | 0            | 0            |
| 0 | 0            | 0 | -0.052270795 | 0 | 0            | 0            | 0            |
| 0 | 0.062682374  | 0 | 0            | 0 | 0            | 0            | 0            |
| 0 | 0            | 0 | 0            | 0 | 0            | 0            | 0            |
| 0 | 0            | 0 | 0            | 0 | -0.05877316  | 0            | -0.017734669 |
| 0 | 0            | 0 | 0            | 0 | 0            | -0.009312403 | 0            |
| 0 | 0            | 0 | 0            | 0 | -0.068842708 | 0            | 0            |
| 0 | 0.057353461  | 0 | 0            | 0 | 0            | -0.009397954 | 0            |





|   |             |   |              |   |              |   |              |
|---|-------------|---|--------------|---|--------------|---|--------------|
| 0 | 0           | 0 | 0            | 0 | 0            | 0 | 0            |
| 0 | 0           | 0 | -0.041211002 | 0 | 0            | 0 | 0            |
| 0 | 0           | 0 | 0            | 0 | -0.085390988 | 0 | -0.001882506 |
| 0 | 0           | 0 | -0.043381719 | 0 | 0            | 0 | 0            |
| 0 | 0           | 0 | -0.040647759 | 0 | 0            | 0 | 0            |
| 0 | 0           | 0 | -0.043917246 | 0 | 0            | 0 | -0.018767639 |
| 0 | 0           | 0 | 0            | 0 | -0.066385557 | 0 | 0.000738937  |
| 0 | 0           | 0 | -0.041173636 | 0 | 0            | 0 | 0            |
| 0 | 0           | 0 | 0            | 0 | 0            | 0 | -0.025736006 |
| 0 | 0           | 0 | -0.049469659 | 0 | 0            | 0 | -0.014607826 |
| 0 | 0           | 0 | -0.044923368 | 0 | 0            | 0 | -0.011832901 |
| 0 | 0           | 0 | 0            | 0 | -0.088226985 | 0 | 0.02527711   |
| 0 | 0.041778149 | 0 | 0            | 0 | -0.082767441 | 0 | 0            |
| 0 | 0.048142364 | 0 | 0            | 0 | -0.082772603 | 0 | 0            |
| 0 | 0           | 0 | 0            | 0 | -0.082822975 | 0 | 0            |
| 0 | 0           | 0 | -0.047619119 | 0 | 0            | 0 | 0            |
| 0 | 0           | 0 | -0.044310261 | 0 | 0            | 0 | -0.019020996 |
| 0 | 0           | 0 | -0.057850353 | 0 | 0            | 0 | -0.011175032 |
| 0 | 0           | 0 | -0.053904124 | 0 | 0            | 0 | 0            |
| 0 | 0           | 0 | 0.17758539   | 0 | -0.24518699  | 0 | 0.054833615  |
| 0 | 0.075850351 | 0 | 0.17761113   | 0 | -0.24513802  | 0 | 0.054804423  |
| 0 | 0           | 0 | -0.043525173 | 0 | 0            | 0 | 0            |
| 0 | 0.075808477 | 0 | 0            | 0 | 0            | 0 | 0            |
| 0 | 0.066453542 | 0 | 0            | 0 | 0            | 0 | 0.008982192  |
| 0 | 0           | 0 | 0            | 0 | 0            | 0 | 0            |
| 0 | 0           | 0 | 0            | 0 | 0            | 0 | -0.020201413 |
| 0 | 0           | 0 | 0            | 0 | 0            | 0 | 0.009047944  |
| 0 | 0           | 0 | 0            | 0 | 0            | 0 | -0.019931343 |
| 0 | 0           | 0 | 0            | 0 | 0            | 0 | -0.012764193 |
| 0 | 0.062232839 | 0 | 0            | 0 | 0            | 0 | 0            |
| 0 | 0           | 0 | 0            | 0 | 0            | 0 | 0            |
| 0 | 0           | 0 | 0            | 0 | 0            | 0 | 0            |
| 0 | 0           | 0 | 0.17946478   | 0 | -0.26657245  | 0 | 0.054874494  |
| 0 | 0           | 0 | 0            | 0 | 0            | 0 | -0.023380529 |
| 0 | 0           | 0 | 0            | 0 | 0            | 0 | 0            |
| 0 | 0           | 0 | 0            | 0 | 0            | 0 | -0.023009104 |
| 0 | 0.06962881  | 0 | 0            | 0 | 0            | 0 | 0.016269055  |
| 0 | 0           | 0 | 0            | 0 | 0            | 0 | 0.016329089  |
| 0 | 0           | 0 | 0            | 0 | 0            | 0 | -0.023380823 |
| 0 | 0           | 0 | 0            | 0 | 0            | 0 | -0.003306213 |
| 0 | 0           | 0 | 0            | 0 | 0            | 0 | -0.023656303 |
| 0 | 0           | 0 | 0            | 0 | 0            | 0 | 0            |
| 0 | 0           | 0 | 0            | 0 | 0            | 0 | -0.001418844 |
| 0 | 0.065511333 | 0 | 0            | 0 | 0            | 0 | 0.015935848  |
| 0 | 0.055455418 | 0 | 0            | 0 | 0            | 0 | 0.015824047  |
| 0 | 0           | 0 | 0            | 0 | 0            | 0 | 0.015974087  |
| 0 | 0           | 0 | 0            | 0 | 0            | 0 | 0            |



|   |             |   |              |   |              |   |              |   |
|---|-------------|---|--------------|---|--------------|---|--------------|---|
| 0 | 0.060479696 | 0 | -0.061781826 | 0 | 0            | 0 | 0.027261482  | 0 |
| 0 | 0           | 0 | -0.061852191 | 0 | 0            | 0 | 0.027312953  | 0 |
| 0 | 0.058586106 | 0 | 0            | 0 | 0            | 0 | 0            | 0 |
| 0 | 0           | 0 | 0            | 0 | 0            | 0 | 0            | 0 |
| 0 | 0           | 0 | -0.077765774 | 0 | 0            | 0 | 0.010996205  | 0 |
| 0 | 0.055921629 | 0 | 0            | 0 | 0            | 0 | 0            | 0 |
| 0 | 0.057658192 | 0 | 0            | 0 | 0            | 0 | 0            | 0 |
| 0 | 0           | 0 | -0.079463343 | 0 | 0            | 0 | 0            | 0 |
| 0 | 0           | 0 | 0            | 0 | 0            | 0 | 0            | 0 |
| 0 | 0           | 0 | 0            | 0 | 0            | 0 | 0            | 0 |
| 0 | 0           | 0 | 0            | 0 | 0            | 0 | -0.020165721 | 0 |
| 0 | 0           | 0 | -0.052467456 | 0 | 0            | 0 | 0.000671897  | 0 |
| 0 | 0.049988321 | 0 | 0            | 0 | -0.0797999   | 0 | 0.051992557  | 0 |
| 0 | 0           | 0 | 0            | 0 | -0.079805831 | 0 | 0.051997718  | 0 |
| 0 | 0           | 0 | 0            | 0 | 0            | 0 | -0.011275257 | 0 |
| 0 | 0           | 0 | -0.072158894 | 0 | 0            | 0 | 0.000908439  | 0 |
| 0 | 0.056802164 | 0 | -0.068609919 | 0 | 0            | 0 | 0            | 0 |
| 0 | 0           | 0 | -0.06865726  | 0 | 0            | 0 | 0            | 0 |
| 0 | 0.045377084 | 0 | -0.071248587 | 0 | 0            | 0 | 0            | 0 |
| 0 | 0           | 0 | 0            | 0 | 0            | 0 | 0.013619908  | 0 |
| 0 | 0.028416203 | 0 | 0            | 0 | -0.071725916 | 0 | 0.05084045   | 0 |
| 0 | 0           | 0 | -0.074843288 | 0 | 0            | 0 | 0.025921997  | 0 |
| 0 | 0           | 0 | 0            | 0 | 0            | 0 | 0.00698195   | 0 |
| 0 | 0           | 0 | 0            | 0 | 0            | 0 | -0.008872672 | 0 |
| 0 | 0.10471479  | 0 | 0            | 0 | 0            | 0 | 0.020416155  | 0 |
| 0 | 0           | 0 | 0            | 0 | 0            | 0 | 0.020470359  | 0 |
| 0 | 0.10690557  | 0 | 0            | 0 | 0            | 0 | 0            | 0 |
| 0 | 0.064768235 | 0 | 0            | 0 | 0            | 0 | 0            | 0 |
| 0 | 0           | 0 | 0            | 0 | 0            | 0 | 0            | 0 |
| 0 | 0.058949563 | 0 | -0.065006317 | 0 | 0            | 0 | 0.053219897  | 0 |
| 0 | 0           | 0 | -0.065005188 | 0 | 0            | 0 | 0.053225337  | 0 |
| 0 | 0.032021641 | 0 | -0.059551143 | 0 | 0            | 0 | 0.052445833  | 0 |
| 0 | 0.074492287 | 0 | 0            | 0 | 0            | 0 | 0.030155272  | 0 |
| 0 | 0.064490772 | 0 | 0            | 0 | 0            | 0 | 0.030172757  | 0 |
| 0 | 0           | 0 | 0            | 0 | 0            | 0 | 0.030241308  | 0 |
| 0 | 0.093397838 | 0 | 0            | 0 | 0            | 0 | 0.037329502  | 0 |
| 0 | 0           | 0 | 0            | 0 | 0            | 0 | 0.037381345  | 0 |
| 0 | 0.072328017 | 0 | 0            | 0 | 0            | 0 | 0            | 0 |
| 0 | 0.060435538 | 0 | 0            | 0 | 0            | 0 | 0.043016205  | 0 |
| 0 | 0.042141637 | 0 | 0.13371754   | 0 | -0.23257248  | 0 | 0            | 0 |
| 0 | 0           | 0 | 0.13368426   | 0 | -0.2325576   | 0 | 0            | 0 |
| 0 | 0.063692875 | 0 | 0            | 0 | 0            | 0 | 0            | 0 |
| 0 | 0.029706852 | 0 | 0.13287945   | 0 | -0.22558289  | 0 | 0            | 0 |
| 0 | 0           | 0 | 0            | 0 | 0            | 0 | 0.025997494  | 0 |
| 0 | 0.047604834 | 0 | 0            | 0 | 0            | 0 | 0.065344942  | 0 |
| 0 | 0.028982695 | 0 | 0            | 0 | -0.10045525  | 0 | 0            | 0 |
| 0 | 0.031622605 | 0 | -0.087725467 | 0 | 0            | 0 | 0            | 0 |

|   |              |   |            |   |              |   |              |   |
|---|--------------|---|------------|---|--------------|---|--------------|---|
| 0 | 0            | 0 | 0.20393409 | 0 | -0.25930144  | 0 | 0            | 0 |
| 0 | 0            | 0 | 0.20441329 | 0 | -0.2623693   | 0 | 0            | 0 |
| 0 | 0            | 0 | 0.2005586  | 0 | -0.2411425   | 0 | 0            | 0 |
| 0 | 0.057793274  | 0 | 0.20048915 | 0 | -0.24107269  | 0 | 0            | 0 |
| 0 | 0            | 0 | 0.21075228 | 0 | -0.26634846  | 0 | 0            | 0 |
| 0 | 0            | 0 | 0.20319476 | 0 | -0.25839843  | 0 | 0            | 0 |
| 0 | 0.057847556  | 0 | 0.20314845 | 0 | -0.25848667  | 0 | 0            | 0 |
| 0 | 0.025206983  | 0 | 0.20671223 | 0 | -0.26084015  | 0 | 0            | 0 |
| 0 | 0            | 0 | 0.20669723 | 0 | -0.26093595  | 0 | 0            | 0 |
| 0 | 0            | 0 | 0.20676705 | 0 | -0.24792789  | 0 | 0            | 0 |
| 0 | 0.056422077  | 0 | 0.20678526 | 0 | -0.24792603  | 0 | 0            | 0 |
| 0 | 0.056044165  | 0 | 0.20032747 | 0 | -0.24394371  | 0 | 0            | 0 |
| 0 | 0.057803876  | 0 | 0.19267666 | 0 | -0.25543381  | 0 | 0            | 0 |
| 0 | 0            | 0 | 0.20025335 | 0 | -0.2439695   | 0 | 0            | 0 |
| 0 | 0            | 0 | 0.19261017 | 0 | -0.25545205  | 0 | 0            | 0 |
| 0 | 0            | 0 | 0.207209   | 0 | -0.26555439  | 0 | -0.006063675 | 0 |
| 0 | 0            | 0 | 0.20839533 | 0 | -0.26533142  | 0 | 0            | 0 |
| 0 | 0            | 0 | 0.20766827 | 0 | -0.26688948  | 0 | 0            | 0 |
| 0 | 0            | 0 | 0.20384869 | 0 | -0.25541154  | 0 | 0            | 0 |
| 0 | 0.030716076  | 0 | 0.20384965 | 0 | -0.25557136  | 0 | 0            | 0 |
| 0 | 0.056174473  | 0 | 0.20228909 | 0 | -0.25741848  | 0 | 0            | 0 |
| 0 | 0            | 0 | 0.20221744 | 0 | -0.25744597  | 0 | 0            | 0 |
| 0 | 0            | 0 | 0.20037449 | 0 | -0.2485689   | 0 | 0            | 0 |
| 0 | 0            | 0 | 0.20551189 | 0 | -0.26938422  | 0 | 0            | 0 |
| 0 | 0.054428096  | 0 | 0.20029953 | 0 | -0.24857724  | 0 | 0            | 0 |
| 0 | 0.053374377  | 0 | 0.20205452 | 0 | -0.25047289  | 0 | 0            | 0 |
| 0 | 0            | 0 | 0.20387103 | 0 | -0.26387297  | 0 | 0            | 0 |
| 0 | 0            | 0 | 0.20198856 | 0 | -0.25049938  | 0 | 0            | 0 |
| 0 | 0.054067211  | 0 | 0.20345397 | 0 | -0.24808892  | 0 | -0.00386717  | 0 |
| 0 | 0            | 0 | 0.2057133  | 0 | -0.26373563  | 0 | 0.0039407    | 0 |
| 0 | 0            | 0 | 0.20339047 | 0 | -0.2481256   | 0 | -0.003805015 | 0 |
| 0 | 0.047782653  | 0 | 0.20384393 | 0 | -0.24857589  | 0 | 0            | 0 |
| 0 | 0            | 0 | 0.19174829 | 0 | -0.2651755   | 0 | 0            | 0 |
| 0 | 0            | 0 | 0.20256855 | 0 | -0.24559983  | 0 | 0.005448552  | 0 |
| 0 | -0.028166438 | 0 | 0.20166664 | 0 | -0.24466167  | 0 | 0            | 0 |
| 0 | 0.059728386  | 0 | 0.20250735 | 0 | -0.24556522  | 0 | 0.005480756  | 0 |
| 0 | 0.06146565   | 0 | 0.19393723 | 0 | -0.26811386  | 0 | 0.011149288  | 0 |
| 0 | 0            | 0 | 0.19388386 | 0 | -0.26813081  | 0 | 0.011209702  | 0 |
| 0 | 0.06180908   | 0 | 0.19088805 | 0 | -0.26726317  | 0 | 0            | 0 |
| 0 | 0.058414864  | 0 | 0.19100212 | 0 | -0.26883107  | 0 | 0            | 0 |
| 0 | 0.046340267  | 0 | 0.19074675 | 0 | -0.26852514  | 0 | 0            | 0 |
| 0 | 0            | 0 | 0.19082229 | 0 | -0.26723776  | 0 | 0            | 0 |
| 0 | 0            | 0 | 0.19093783 | 0 | -0.26885494  | 0 | 0            | 0 |
| 0 | 0.029434492  | 0 | 0.1813443  | 0 | -0.24338873  | 0 | 0            | 0 |
| 0 | 0            | 0 | 0.18104436 | 0 | -0.24316312  | 0 | 0            | 0 |
| 0 | 0            | 0 | 0          | 0 | -0.055412873 | 0 | 0            | 0 |
| 0 | 0.029579486  | 0 | 0          | 0 | -0.055480025 | 0 | 0            | 0 |

|   |              |   |            |   |              |   |              |   |
|---|--------------|---|------------|---|--------------|---|--------------|---|
| 0 | 0            | 0 | 0.18765434 | 0 | -0.25506992  | 0 | 0.013839742  | 0 |
| 0 | 0            | 0 | 0          | 0 | -0.05725386  | 0 | 0            | 0 |
| 0 | 0            | 0 | 0          | 0 | -0.060870476 | 0 | 0            | 0 |
| 0 | 0            | 0 | 0          | 0 | -0.05495204  | 0 | 0            | 0 |
| 0 | 0.057551683  | 0 | 0          | 0 | -0.055050814 | 0 | 0            | 0 |
| 0 | 0.062844093  | 0 | 0.18495663 | 0 | -0.23640276  | 0 | 0.015462594  | 0 |
| 0 | 0            | 0 | 0.18491884 | 0 | -0.23645566  | 0 | 0.015516318  | 0 |
| 0 | 0            | 0 | 0.18197365 | 0 | -0.24923184  | 0 | 0            | 0 |
| 0 | 0            | 0 | 0          | 0 | -0.060481259 | 0 | -0.007737072 | 0 |
| 0 | 0            | 0 | 0.20119855 | 0 | -0.25466863  | 0 | 0            | 0 |
| 0 | 0            | 0 | 0          | 0 | -0.062130317 | 0 | 0            | 0 |
| 0 | 0.026963073  | 0 | 0          | 0 | -0.05860901  | 0 | 0            | 0 |
| 0 | 0            | 0 | 0          | 0 | -0.058704509 | 0 | 0            | 0 |
| 0 | 0            | 0 | 0.19712212 | 0 | -0.24092767  | 0 | -0.015685415 | 0 |
| 0 | 0.063028412  | 0 | 0          | 0 | -0.062256217 | 0 | 0            | 0 |
| 0 | 0            | 0 | 0          | 0 | -0.062332827 | 0 | 0            | 0 |
| 0 | 0.055890974  | 0 | 0.17941917 | 0 | -0.23559652  | 0 | 0            | 0 |
| 0 | 0            | 0 | 0.17936367 | 0 | -0.23561439  | 0 | 0            | 0 |
| 0 | 0            | 0 | 0.20330809 | 0 | -0.24732348  | 0 | 0            | 0 |
| 0 | 0            | 0 | 0          | 0 | -0.059797682 | 0 | 0            | 0 |
| 0 | 0            | 0 | 0          | 0 | -0.046332694 | 0 | 0            | 0 |
| 0 | 0.057052412  | 0 | 0          | 0 | -0.046313785 | 0 | 0            | 0 |
| 0 | 0            | 0 | 0          | 0 | -0.046367948 | 0 | -0.00591471  | 0 |
| 0 | 0.040694212  | 0 | 0.17884743 | 0 | -0.23178093  | 0 | 0            | 0 |
| 0 | 0.055788728  | 0 | 0          | 0 | -0.046365528 | 0 | -0.005908909 | 0 |
| 0 | 0            | 0 | 0          | 0 | -0.062792047 | 0 | -0.00984122  | 0 |
| 0 | 0            | 0 | 0.20485766 | 0 | -0.24863106  | 0 | -0.019453514 | 0 |
| 0 | 0            | 0 | 0.19833337 | 0 | -0.24457444  | 0 | -0.01913356  | 0 |
| 0 | 0            | 0 | 0          | 0 | -0.046712481 | 0 | 0            | 0 |
| 0 | -0.000282192 | 0 | 0          | 0 | -0.046565682 | 0 | 0            | 0 |
| 0 | 0            | 0 | 0          | 0 | -0.056314205 | 0 | 0            | 0 |
| 0 | 0.028405597  | 0 | 0          | 0 | -0.056343215 | 0 | 0            | 0 |
| 0 | 0.05750393   | 0 | 0          | 0 | -0.046768443 | 0 | 0            | 0 |
| 0 | 0            | 0 | 0.19947449 | 0 | -0.24707356  | 0 | 0            | 0 |
| 0 | 0            | 0 | 0          | 0 | -0.061385794 | 0 | 0            | 0 |
| 0 | 0            | 0 | 0.20409691 | 0 | -0.2539327   | 0 | 0            | 0 |
| 0 | 0.056859212  | 0 | 0          | 0 | -0.059527947 | 0 | 0            | 0 |
| 0 | 0            | 0 | 0          | 0 | -0.05962323  | 0 | 0            | 0 |
| 0 | 0            | 0 | 0.20049277 | 0 | -0.26088297  | 0 | -0.013421779 | 0 |
| 0 | 0            | 0 | 0.19944768 | 0 | -0.25518114  | 0 | 0            | 0 |
| 0 | 0            | 0 | 0.20524543 | 0 | -0.25886983  | 0 | 0            | 0 |
| 0 | 0.04573404   | 0 | 0          | 0 | -0.069392603 | 0 | 0            | 0 |
| 0 | 0            | 0 | 0          | 0 | -0.063627003 | 0 | 0            | 0 |
| 0 | 0            | 0 | 0          | 0 | -0.069454334 | 0 | 0            | 0 |
| 0 | 0.043861536  | 0 | 0          | 0 | -0.063777918 | 0 | 0            | 0 |
| 0 | 0            | 0 | 0          | 0 | -0.060786145 | 0 | -0.009933591 | 0 |
| 0 | 0            | 0 | 0          | 0 | -0.057803239 | 0 | 0            | 0 |

|   |             |   |            |   |              |   |              |   |
|---|-------------|---|------------|---|--------------|---|--------------|---|
| 0 | 0           | 0 | 0.19965472 | 0 | -0.25215523  | 0 | -0.01656045  | 0 |
| 0 | 0.057121896 | 0 | 0          | 0 | -0.057798182 | 0 | 0            | 0 |
| 0 | 0           | 0 | 0.20137804 | 0 | -0.26017243  | 0 | 0            | 0 |
| 0 | 0.057257895 | 0 | 0          | 0 | -0.066630474 | 0 | -0.001202028 | 0 |
| 0 | 0.043287707 | 0 | 0          | 0 | -0.066429467 | 0 | 0            | 0 |
| 0 | 0           | 0 | 0          | 0 | -0.073711684 | 0 | 0            | 0 |
| 0 | 0           | 0 | 0          | 0 | -0.066701987 | 0 | -0.001143496 | 0 |
| 0 | 0           | 0 | 0          | 0 | -0.061354575 | 0 | -0.003480571 | 0 |
| 0 | 0           | 0 | 0          | 0 | -0.059819377 | 0 | 0            | 0 |
| 0 | 0           | 0 | 0          | 0 | -0.062285875 | 0 | 0            | 0 |
| 0 | 0           | 0 | 0          | 0 | -0.060979097 | 0 | 0            | 0 |
| 0 | 0.004671349 | 0 | 0          | 0 | -0.061059596 | 0 | 0            | 0 |
| 0 | 0.056604681 | 0 | 0          | 0 | -0.061484227 | 0 | -0.003477102 | 0 |
| 0 | 0           | 0 | 0.19999827 | 0 | -0.25001617  | 0 | 0            | 0 |
| 0 | 0.057397457 | 0 | 0          | 0 | -0.061106492 | 0 | 0            | 0 |
| 0 | 0           | 0 | 0.20081417 | 0 | -0.2574649   | 0 | -0.016707123 | 0 |
| 0 | 0.053618396 | 0 | 0          | 0 | -0.049236208 | 0 | -0.007470074 | 0 |
| 0 | 0           | 0 | 0          | 0 | -0.051250415 | 0 | 0            | 0 |
| 0 | 0           | 0 | 0          | 0 | -0.049331897 | 0 | -0.007403379 | 0 |
| 0 | 0           | 0 | 0.19428235 | 0 | -0.25906186  | 0 | 0            | 0 |
| 0 | 0           | 0 | 0.19769351 | 0 | -0.25126684  | 0 | -0.009606741 | 0 |
| 0 | 0.054343625 | 0 | 0          | 0 | -0.05125432  | 0 | 0            | 0 |
| 0 | 0           | 0 | 0.18944216 | 0 | -0.2579285   | 0 | -0.009853553 | 0 |
| 0 | 0.055897994 | 0 | 0          | 0 | -0.049846599 | 0 | 0            | 0 |
| 0 | 0.043677297 | 0 | 0          | 0 | -0.049472423 | 0 | 0            | 0 |
| 0 | 0           | 0 | 0          | 0 | -0.04992695  | 0 | 0            | 0 |
| 0 | 0.028753524 | 0 | 0          | 0 | -0.060757264 | 0 | 0            | 0 |
| 0 | 0           | 0 | 0          | 0 | -0.059436586 | 0 | 0            | 0 |
| 0 | 0.032550341 | 0 | 0          | 0 | -0.062506067 | 0 | 0            | 0 |
| 0 | 0           | 0 | 0          | 0 | -0.060850594 | 0 | 0            | 0 |
| 0 | 0           | 0 | 0          | 0 | -0.062572619 | 0 | 0            | 0 |
| 0 | 0.0352471   | 0 | 0          | 0 | -0.05957795  | 0 | 0            | 0 |
| 0 | 0.025396347 | 0 | 0          | 0 | -0.05958359  | 0 | -0.004649552 | 0 |
| 0 | 0           | 0 | 0.20132365 | 0 | -0.25746926  | 0 | 0            | 0 |
| 0 | 0           | 0 | 0          | 0 | -0.059686786 | 0 | -0.00466537  | 0 |
| 0 | 0           | 0 | 0          | 0 | -0.047205129 | 0 | -0.007425151 | 0 |
| 0 | 0.047130063 | 0 | 0          | 0 | -0.059761467 | 0 | 0            | 0 |
| 0 | 0.053881531 | 0 | 0          | 0 | -0.047182837 | 0 | -0.007517882 | 0 |
| 0 | 0           | 0 | 0.19278208 | 0 | -0.28055436  | 0 | 0.012073327  | 0 |
| 0 | 0.010159846 | 0 | 0          | 0 | -0.047483263 | 0 | 0            | 0 |
| 0 | 0           | 0 | 0.18913185 | 0 | -0.27910463  | 0 | 0            | 0 |
| 0 | 0           | 0 | 0          | 0 | -0.064971252 | 0 | -0.007826686 | 0 |
| 0 | 0.054692528 | 0 | 0          | 0 | -0.061509483 | 0 | -0.004587352 | 0 |
| 0 | 0           | 0 | 0          | 0 | -0.063309566 | 0 | -0.007485757 | 0 |
| 0 | -0.00980092 | 0 | 0          | 0 | -0.054361325 | 0 | 0            | 0 |
| 0 | 0           | 0 | 0          | 0 | -0.054366816 | 0 | 2.09E-05     | 0 |
| 0 | 0.055498732 | 0 | 0          | 0 | -0.061330258 | 0 | 0            | 0 |

|   |              |   |              |   |              |   |              |   |
|---|--------------|---|--------------|---|--------------|---|--------------|---|
| 0 | 0            | 0 | 0            | 0 | -0.061606488 | 0 | -0.004518512 | 0 |
| 0 | 0            | 0 | 0            | 0 | -0.057378632 | 0 | 0.004595562  | 0 |
| 0 | 0.045234515  | 0 | 0            | 0 | -0.061721733 | 0 | 0            | 0 |
| 0 | 0            | 0 | 0            | 0 | -0.061429105 | 0 | 0            | 0 |
| 0 | 0            | 0 | 0            | 0 | -0.062953936 | 0 | 0            | 0 |
| 0 | 0            | 0 | -0.038979088 | 0 | 0            | 0 | 0            | 0 |
| 0 | 0.054154137  | 0 | 0            | 0 | -0.054445191 | 0 | 2.88E-05     | 0 |
| 0 | 0.033087914  | 0 | 0            | 0 | -0.05753147  | 0 | 0.00461809   | 0 |
| 0 | 0.037702135  | 0 | -0.039059635 | 0 | 0            | 0 | 0            | 0 |
| 0 | -0.024908158 | 0 | 0            | 0 | -0.057235146 | 0 | 0            | 0 |
| 0 | 0            | 0 | 0            | 0 | -0.069342572 | 0 | 0            | 0 |
| 0 | 0            | 0 | 0            | 0 | -0.069805446 | 0 | -0.003315838 | 0 |
| 0 | 0.051319385  | 0 | 0            | 0 | -0.054734779 | 0 | -0.005400889 | 0 |
| 0 | 0            | 0 | 0            | 0 | -0.054825185 | 0 | -0.00534479  | 0 |
| 0 | 0.045625152  | 0 | 0            | 0 | -0.054862077 | 0 | 0            | 0 |
| 0 | 0            | 0 | 0            | 0 | -0.077098985 | 0 | -0.000291637 | 0 |
| 0 | 0            | 0 | -0.03762697  | 0 | 0            | 0 | 0            | 0 |
| 0 | 0            | 0 | 0            | 0 | -0.066039752 | 0 | -0.000854973 | 0 |
| 0 | 0.058914381  | 0 | -0.037729194 | 0 | 0            | 0 | 0            | 0 |
| 0 | 0            | 0 | -0.040975133 | 0 | 0            | 0 | 0            | 0 |
| 0 | 0            | 0 | -0.032281854 | 0 | 0            | 0 | 0            | 0 |
| 0 | 0.058373582  | 0 | -0.032261308 | 0 | 0            | 0 | 0            | 0 |
| 0 | 0            | 0 | -0.032486564 | 0 | 0            | 0 | -0.006720313 | 0 |
| 0 | 0.056839768  | 0 | -0.032487434 | 0 | 0            | 0 | -0.006711649 | 0 |
| 0 | 0            | 0 | -0.03095041  | 0 | 0            | 0 | 0            | 0 |
| 0 | 0.059859789  | 0 | -0.031011778 | 0 | 0            | 0 | 0            | 0 |
| 0 | 0.001642272  | 0 | -0.032629093 | 0 | 0            | 0 | 0            | 0 |
| 0 | 0.045709291  | 0 | 0            | 0 | -0.050633724 | 0 | -0.005185259 | 0 |
| 0 | 0            | 0 | -0.045533747 | 0 | 0            | 0 | 0            | 0 |
| 0 | 0.033743047  | 0 | 0            | 0 | -0.064993437 | 0 | 0.012766678  | 0 |
| 0 | 0            | 0 | 0            | 0 | -0.065062871 | 0 | 0.012762716  | 0 |
| 0 | 0            | 0 | -0.045253667 | 0 | 0            | 0 | -0.009659423 | 0 |
| 0 | -0.023923066 | 0 | 0            | 0 | -0.049083234 | 0 | 0.003527806  | 0 |
| 0 | 0.035107259  | 0 | -0.042379199 | 0 | 0            | 0 | 0            | 0 |
| 0 | 0            | 0 | -0.042476067 | 0 | 0            | 0 | 0            | 0 |
| 0 | 0            | 0 | -0.044348272 | 0 | 0            | 0 | 0            | 0 |
| 0 | 0.059432644  | 0 | 0.18264366   | 0 | -0.25277615  | 0 | 0.02876241   | 0 |
| 0 | 0            | 0 | 0.1826045    | 0 | -0.25280591  | 0 | 0.028815182  | 0 |
| 0 | 0.065057219  | 0 | -0.047197865 | 0 | 0            | 0 | 0            | 0 |
| 0 | 0            | 0 | -0.047280047 | 0 | 0            | 0 | 0            | 0 |
| 0 | 0            | 0 | -0.043699924 | 0 | 0            | 0 | 0            | 0 |
| 0 | 0            | 0 | -0.039452107 | 0 | 0            | 0 | 0            | 0 |
| 0 | 0.03678749   | 0 | -0.039493826 | 0 | 0            | 0 | 0            | 0 |
| 0 | 0.040795946  | 0 | 0            | 0 | -0.065906041 | 0 | 0            | 0 |
| 0 | 0.03062815   | 0 | 0            | 0 | -0.065996185 | 0 | 0            | 0 |
| 0 | 0            | 0 | 0            | 0 | -0.066066272 | 0 | 0            | 0 |
| 0 | 0.042569905  | 0 | 0            | 0 | -0.078479363 | 0 | 0.008436693  | 0 |

|   |              |   |              |              |             |              |
|---|--------------|---|--------------|--------------|-------------|--------------|
| 0 | 0.060692996  | 0 | 0            | -0.078391469 | 0           | 0.008345734  |
| 0 | 0.060414927  | 0 | 0            | -0.078465376 | 0           | 0.008403202  |
| 0 | 0            | 0 | 0            | -0.078414344 | 0           | 0.008378731  |
| 0 | 0            | 0 | 0            | -0.078532933 | 0           | 0.00846518   |
| 0 | 0.057781862  | 0 | -0.040940731 | 0            | 0           | 0            |
| 0 | 0            | 0 | -0.04104083  | 0            | 0           | 0            |
| 0 | 0.043641192  | 0 | 0            | -0.079919817 | 0           | 0            |
| 0 | 0.061057897  | 0 | 0            | -0.079944942 | 0           | 0            |
| 0 | 0.054620602  | 0 | -0.035554931 | 0            | 0           | -0.008188568 |
| 0 | 0.043791207  | 0 | 0            | -0.081150053 | 0           | 0            |
| 0 | 0            | 0 | 0            | -0.079978939 | 0           | 0            |
| 0 | 0            | 0 | -0.042288232 | 0            | 0           | 0            |
| 0 | 0            | 0 | -0.035654638 | 0            | 0           | -0.008128004 |
| 0 | 0            | 0 | -0.047721553 | 0            | 0           | -0.011751668 |
| 0 | 0            | 0 | 0            | -0.070684202 | 0           | 0.010832482  |
| 0 | 0.058135139  | 0 | -0.034334874 | 0            | 0           | 0            |
| 0 | 0            | 0 | -0.034423674 | 0            | 0           | 0            |
| 0 | 0.048160252  | 0 | -0.035743772 | 0            | 0           | 0            |
| 0 | 0            | 0 | -0.038498525 | 0            | 0           | 0            |
| 0 | 0            | 0 | -0.035826321 | 0            | 0           | 0            |
| 0 | 0.058115085  | 0 | -0.038489869 | 0            | 0           | 0            |
| 0 | 0.056281797  | 0 | -0.035829384 | 0            | 0           | 0            |
| 0 | 0            | 0 | -0.032943974 | 0            | 0           | -0.008229801 |
| 0 | 0            | 0 | 0            | 0            | 0           | 0            |
| 0 | 0.054930706  | 0 | -0.032920846 | 0            | 0           | -0.008321307 |
| 0 | 0.045767011  | 0 | 0            | 0            | 0           | 0            |
| 0 | 0.059506855  | 0 | 0            | -0.058884295 | 0           | 0.011250473  |
| 0 | 0            | 0 | 0            | -0.058949834 | 0           | 0.01130544   |
| 0 | 0.012062181  | 0 | -0.033195164 | 0            | 0           | 0            |
| 0 | 0            | 0 | 0            | -0.059376314 | 0           | -0.020539095 |
| 0 | 0            | 0 | -0.039976379 | 0            | 0           | 0            |
| 0 | 0            | 0 | -0.045112606 | 0            | 0           | -0.011961751 |
| 0 | 0            | 0 | -0.045723727 | 0            | 0           | 0            |
| 0 | 0            | 0 | 0            | 0            | 0           | 0            |
| 0 | 0.037569713  | 0 | 0            | -0.056084985 | 0           | 0.012031978  |
| 0 | 0            | 0 | 0            | 0            | 0           | 0            |
| 0 | 0.050268542  | 0 | -0.045896921 | 0            | 0           | 0            |
| 0 | 0.066690674  | 0 | 0            | 0            | 0           | 0            |
| 0 | 0.063646474  | 0 | 0            | 0            | 0           | 0            |
| 0 | 0            | 0 | -0.044461413 | 0            | 0           | -0.002627072 |
| 0 | 0            | 0 | -0.044092713 | 0            | 0           | 0            |
| 0 | -0.000240669 | 0 | -0.044212797 | 0            | 0           | 0            |
| 0 | 0            | 0 | 0.18915216   | 0            | -0.27058379 | 0.000545391  |
| 0 | 0.058290043  | 0 | -0.044595601 | 0            | 0           | -0.002631603 |
| 0 | 0.058525899  | 0 | -0.044222988 | 0            | 0           | 0            |
| 0 | 0.039947157  | 0 | 0            | -0.060209156 | 0           | 0            |
| 0 | 0            | 0 | 0            | 0            | 0           | -0.007303101 |

|   |              |   |              |              |   |              |   |
|---|--------------|---|--------------|--------------|---|--------------|---|
| 0 | 0            | 0 | 0            | -0.048693519 | 0 | -0.02272558  | 0 |
| 0 | 0.061938937  | 0 | 0            | 0            | 0 | -0.007296638 | 0 |
| 0 | 0.052977987  | 0 | -0.053382682 | 0            | 0 | 0            | 0 |
| 0 | 0            | 0 | -0.046067756 | 0            | 0 | 0            | 0 |
| 0 | 0            | 0 | -0.05344488  | 0            | 0 | 0            | 0 |
| 0 | -0.00078375  | 0 | 0            | 0            | 0 | 0            | 0 |
| 0 | 0            | 0 | 0            | 0            | 0 | -0.011602198 | 0 |
| 0 | 0.047010774  | 0 | -0.051936248 | 0            | 0 | 0            | 0 |
| 0 | 0.05917264   | 0 | -0.051833392 | 0            | 0 | 0.000476651  | 0 |
| 0 | 0.057227766  | 0 | 0            | 0            | 0 | -0.011690033 | 0 |
| 0 | 0            | 0 | -0.05190868  | 0            | 0 | 0.000533514  | 0 |
| 0 | 0            | 0 | -0.042675993 | 0            | 0 | 0            | 0 |
| 0 | 0.043216397  | 0 | -0.042836545 | 0            | 0 | 0            | 0 |
| 0 | 0            | 0 | 0            | 0            | 0 | 0            | 0 |
| 0 | 0.060462266  | 0 | 0            | 0            | 0 | 0            | 0 |
| 0 | 0.03341073   | 0 | -0.043100799 | 0            | 0 | -0.00548616  | 0 |
| 0 | 0.036519097  | 0 | -0.044001561 | 0            | 0 | 0            | 0 |
| 0 | 0            | 0 | 0            | 0            | 0 | 0            | 0 |
| 0 | 0            | 0 | -0.043205039 | 0            | 0 | -0.005488494 | 0 |
| 0 | 0.053368519  | 0 | 0            | 0            | 0 | 0            | 0 |
| 0 | 0            | 0 | -0.044096585 | 0            | 0 | 0            | 0 |
| 0 | 0.051271934  | 0 | -0.043252303 | 0            | 0 | 0            | 0 |
| 0 | 0.035341484  | 0 | -0.043333294 | 0            | 0 | 0            | 0 |
| 0 | 0            | 0 | -0.043403788 | 0            | 0 | 0            | 0 |
| 0 | 0.016313234  | 0 | 0            | 0            | 0 | 0            | 0 |
| 0 | 0            | 0 | 0            | 0            | 0 | -0.007249965 | 0 |
| 0 | -0.011009214 | 0 | -0.039461081 | 0            | 0 | 0            | 0 |
| 0 | 0            | 0 | -0.039467635 | 0            | 0 | 2.32E-05     | 0 |
| 0 | 0.052499766  | 0 | 0            | 0            | 0 | -0.007230209 | 0 |
| 0 | 0            | 0 | 0            | 0            | 0 | 0            | 0 |
| 0 | 0.05605746   | 0 | -0.039551629 | 0            | 0 | 2.90E-05     | 0 |
| 0 | 0.050111837  | 0 | 0            | 0            | 0 | 0            | 0 |
| 0 | 0            | 0 | 0            | 0            | 0 | 0            | 0 |
| 0 | 0            | 0 | 0            | 0            | 0 | -0.007233605 | 0 |
| 0 | 0.001869675  | 0 | 0            | 0            | 0 | -0.007375601 | 0 |
| 0 | 0.005165501  | 0 | 0            | 0            | 0 | 0            | 0 |
| 0 | 0.05950212   | 0 | 0            | 0            | 0 | -0.007254933 | 0 |
| 0 | 0            | 0 | 0            | -0.052471293 | 0 | -0.017165862 | 0 |
| 0 | 0.002850457  | 0 | 0            | 0            | 0 | 0            | 0 |
| 0 | 0            | 0 | -0.040762342 | 0            | 0 | 0.003769765  | 0 |
| 0 | 0            | 0 | 0.18067996   | -0.24277458  | 0 | 0.003904909  | 0 |
| 0 | -0.023922524 | 0 | -0.040693601 | 0            | 0 | 0            | 0 |
| 0 | 0            | 0 | 0            | -0.060768806 | 0 | -0.020114047 | 0 |
| 0 | 0.04118736   | 0 | -0.040927676 | 0            | 0 | 0.00380318   | 0 |
| 0 | 0            | 0 | -0.058219821 | 0            | 0 | 0            | 0 |
| 0 | 0            | 0 | 0            | -0.058842008 | 0 | 0            | 0 |
| 0 | 0            | 0 | 0            | 0            | 0 | 0            | 0 |

|   |              |   |              |   |              |   |              |   |
|---|--------------|---|--------------|---|--------------|---|--------------|---|
| 0 | 0            | 0 | 0            | 0 | -0.058662029 | 0 | 0            | 0 |
| 0 | 0            | 0 | 0            | 0 | -0.05517299  | 0 | -0.019971032 | 0 |
| 0 | 0.052928787  | 0 | -0.039764439 | 0 | 0            | 0 | -0.006017033 | 0 |
| 0 | 0.055267362  | 0 | -0.04267967  | 0 | 0            | 0 | -0.00554871  | 0 |
| 0 | 0            | 0 | 0.18290092   | 0 | -0.26726052  | 0 | 0.029077597  | 0 |
| 0 | 0.055912266  | 0 | -0.042315135 | 0 | 0            | 0 | 0            | 0 |
| 0 | 0            | 0 | -0.039858022 | 0 | 0            | 0 | -0.005963117 | 0 |
| 0 | 0            | 0 | -0.042778898 | 0 | 0            | 0 | -0.005487742 | 0 |
| 0 | 0            | 0 | -0.042414697 | 0 | 0            | 0 | 0            | 0 |
| 0 | 0.05002824   | 0 | -0.039856601 | 0 | 0            | 0 | 0            | 0 |
| 0 | 0.049691687  | 0 | -0.042872627 | 0 | 0            | 0 | 0            | 0 |
| 0 | 0            | 0 | -0.043987469 | 0 | 0            | 0 | -0.008720483 | 0 |
| 0 | 0            | 0 | -0.043432321 | 0 | 0            | 0 | 0            | 0 |
| 0 | 0            | 0 | 0            | 0 | -0.059041266 | 0 | -0.020164234 | 0 |
| 0 | 0.050428202  | 0 | -0.03669987  | 0 | 0            | 0 | -0.005837274 | 0 |
| 0 | 0            | 0 | 0            | 0 | 0            | 0 | -0.01125465  | 0 |
| 0 | 0            | 0 | 0            | 0 | -0.054551522 | 0 | -0.019874583 | 0 |
| 0 | 0            | 0 | 0            | 0 | -0.052933547 | 0 | 0            | 0 |
| 0 | 0.043772619  | 0 | 0            | 0 | 0            | 0 | 0            | 0 |
| 0 | 0            | 0 | -0.049117429 | 0 | 0            | 0 | -0.009535671 | 0 |
| 0 | 0            | 0 | 0            | 0 | 0            | 0 | 0            | 0 |
| 0 | -0.023031377 | 0 | -0.035029692 | 0 | 0            | 0 | 0.003037345  | 0 |
| 0 | 0            | 0 | 0            | 0 | -0.070559627 | 0 | -0.015460883 | 0 |
| 0 | 0            | 0 | 0            | 0 | 0            | 0 | 0            | 0 |
| 0 | 0            | 0 | 0            | 0 | -0.06545698  | 0 | -0.014602812 | 0 |
| 0 | 0            | 0 | 0            | 0 | 0            | 0 | 0            | 0 |
| 0 | 0.038620569  | 0 | 0            | 0 | 0            | 0 | 0            | 0 |
| 0 | 0.048034603  | 0 | 0.16862687   | 0 | -0.24854929  | 0 | 0            | 0 |
| 0 | 0.043800245  | 0 | 0.16862045   | 0 | -0.24859652  | 0 | 0            | 0 |
| 0 | 0            | 0 | 0.16857673   | 0 | -0.24855677  | 0 | 0            | 0 |
| 0 | 0.036039555  | 0 | 0            | 0 | 0            | 0 | 0            | 0 |
| 0 | 0.059553526  | 0 | 0            | 0 | 0            | 0 | -0.009418177 | 0 |
| 0 | 0            | 0 | 0            | 0 | -0.062340178 | 0 | 0            | 0 |
| 0 | 0            | 0 | 0            | 0 | 0            | 0 | 0            | 0 |
| 0 | 0            | 0 | 0            | 0 | -0.059129622 | 0 | 0            | 0 |
| 0 | 0            | 0 | 0            | 0 | 0            | 0 | -0.009365385 | 0 |
| 0 | 0            | 0 | -0.05182131  | 0 | 0            | 0 | 0            | 0 |
| 0 | 0            | 0 | -0.050333204 | 0 | 0            | 0 | -0.002052552 | 0 |
| 0 | 0.064027729  | 0 | 0            | 0 | 0            | 0 | 0            | 0 |
| 0 | 0            | 0 | -0.052419428 | 0 | 0            | 0 | -0.003333819 | 0 |
| 0 | 0            | 0 | 0            | 0 | -0.061551674 | 0 | -0.017710458 | 0 |
| 0 | 0            | 0 | 0            | 0 | 0            | 0 | 0            | 0 |
| 0 | 0            | 0 | 0            | 0 | 0            | 0 | -0.009413714 | 0 |
| 0 | 0.057356032  | 0 | 0            | 0 | 0            | 0 | 0            | 0 |
| 0 | 0.056711959  | 0 | 0            | 0 | 0            | 0 | -0.009502006 | 0 |
| 0 | 0            | 0 | 0            | 0 | 0            | 0 | -0.009270125 | 0 |
| 0 | 0.050731145  | 0 | 0            | 0 | 0            | 0 | -0.009340073 | 0 |



|   |             |   |              |   |              |              |             |
|---|-------------|---|--------------|---|--------------|--------------|-------------|
| 0 | 0           | 0 | 0            | 0 | 0            | 0            | 0           |
| 0 | 0.05826033  | 0 | 0            | 0 | 0            | 0            | 0           |
| 0 | 0.016804979 | 0 | 0            | 0 | 0            | -0.00931571  | 0           |
| 0 | 0           | 0 | 0            | 0 | 0            | -0.009314153 | 0           |
| 0 | 0.057328647 | 0 | 0            | 0 | 0            | -0.009403004 | 0           |
| 0 | 0.041766714 | 0 | -0.04974107  | 0 | 0            | 0.012614976  | 0           |
| 0 | 0           | 0 | -0.049806681 | 0 | 0            | 0.012627772  | 0           |
| 0 | 0.05647191  | 0 | 0            | 0 | 0            | -0.009157949 | 0           |
| 0 | 0.01522116  | 0 | 0            | 0 | 0            | 0            | 0           |
| 0 | 0           | 0 | 0            | 0 | 0            | 0            | 0           |
| 0 | 0           | 0 | 0            | 0 | 0            | -0.009114075 | 0           |
| 0 | 0.052775784 | 0 | 0            | 0 | 0            | 0            | 0           |
| 0 | 0.017566819 | 0 | 0            | 0 | 0            | 0            | 0           |
| 0 | 0.050386089 | 0 | 0            | 0 | 0            | -0.00894389  | 0           |
| 0 | 0           | 0 | 0            | 0 | 0            | -0.012492252 | 0           |
| 0 | 0.016468132 | 0 | 0            | 0 | 0            | 0            | 0           |
| 0 | 0           | 0 | 0            | 0 | 0            | -0.008923246 | 0           |
| 0 | 0           | 0 | 0            | 0 | 0            | -0.012964207 | 0           |
| 0 | 0           | 0 | 0            | 0 | -0.091375762 | 0            | 0.009247757 |
| 0 | 0.058794284 | 0 | 0            | 0 | 0            | 0            | 0           |
| 0 | 0.0618901   | 0 | 0            | 0 | 0            | -0.00901393  | 0           |
| 0 | 0           | 0 | 0            | 0 | 0            | 0            | 0           |
| 0 | 0           | 0 | 0            | 0 | 0            | -0.018305892 | 0           |
| 0 | 0           | 0 | 0            | 0 | 0            | -0.008816056 | 0           |
| 0 | 0.061820966 | 0 | 0            | 0 | 0            | 0            | 0           |
| 0 | 0           | 0 | 0            | 0 | 0            | 0            | 0           |
| 0 | 0           | 0 | -0.061893538 | 0 | 0            | 0.000348812  | 0           |
| 0 | 0           | 0 | 0            | 0 | 0            | -0.014689427 | 0           |
| 0 | 0.037835197 | 0 | -0.050664809 | 0 | 0            | 0            | 0           |
| 0 | 0.044312196 | 0 | -0.05092558  | 0 | 0            | 0            | 0           |
| 0 | 0           | 0 | -0.050734224 | 0 | 0            | 0            | 0           |
| 0 | 0           | 0 | -0.034733746 | 0 | 0            | -0.023866374 | 0           |
| 0 | 0.061840043 | 0 | -0.044696157 | 0 | 0            | 0.011720428  | 0           |
| 0 | 0           | 0 | -0.044765958 | 0 | 0            | 0.011773355  | 0           |
| 0 | 0.041578036 | 0 | -0.043321323 | 0 | 0            | 0.012156622  | 0           |
| 0 | 0           | 0 | -0.042245164 | 0 | 0            | -0.020738718 | 0           |
| 0 | 0.043377925 | 0 | -0.046306073 | 0 | 0            | 0            | 0           |
| 0 | 0.050450172 | 0 | 0            | 0 | -0.077051385 | 0            | 0.026424567 |
| 0 | 0           | 0 | 0            | 0 | -0.077083524 | 0            | 0.026448912 |
| 0 | 0           | 0 | -0.056033691 | 0 | 0            | 0.010385733  | 0           |
| 0 | 0           | 0 | -0.036967893 | 0 | 0            | -0.018474901 | 0           |
| 0 | 0.038658045 | 0 | 0            | 0 | -0.074379321 | 0            | 0.025157163 |
| 0 | 0.036115901 | 0 | 0            | 0 | 0            | 0            | 0           |
| 0 | 0           | 0 | 0            | 0 | 0            | 0            | 0           |
| 0 | 0.03648883  | 0 | 0            | 0 | 0            | -0.006629831 | 0           |
| 0 | 0           | 0 | 0            | 0 | 0            | -0.006648716 | 0           |
| 0 | 0.062298086 | 0 | 0            | 0 | 0            | 0            | 0           |

|   |              |   |              |   |             |   |              |   |
|---|--------------|---|--------------|---|-------------|---|--------------|---|
| 0 | 0.070007202  | 0 | -0.062805432 | 0 | 0           | 0 | 0.010035424  | 0 |
| 0 | 0            | 0 | -0.062825218 | 0 | 0           | 0 | 0.010071869  | 0 |
| 0 | 0            | 0 | 0            | 0 | 0           | 0 | 0            | 0 |
| 0 | -0.013007803 | 0 | 0            | 0 | 0           | 0 | 0            | 0 |
| 0 | 0            | 0 | 0            | 0 | 0           | 0 | 0.000726355  | 0 |
| 0 | -0.012357553 | 0 | 0            | 0 | 0           | 0 | 0            | 0 |
| 0 | 0.062627621  | 0 | -0.064950234 | 0 | 0           | 0 | 0.011633343  | 0 |
| 0 | -0.015150462 | 0 | 0            | 0 | 0           | 0 | 0.001321854  | 0 |
| 0 | 0            | 0 | 0            | 0 | 0           | 0 | 0.000458652  | 0 |
| 0 | 0.045999369  | 0 | -0.065007659 | 0 | 0           | 0 | 0.011650763  | 0 |
| 0 | 0            | 0 | 0            | 0 | 0           | 0 | 0.001339399  | 0 |
| 0 | -0.017057232 | 0 | 0            | 0 | 0           | 0 | 0            | 0 |
| 0 | -0.012882385 | 0 | 0            | 0 | 0           | 0 | 0.000715856  | 0 |
| 0 | 0            | 0 | -0.065022942 | 0 | 0           | 0 | 0.011693956  | 0 |
| 0 | 0.063405784  | 0 | 0            | 0 | 0           | 0 | 0            | 0 |
| 0 | 0.06181629   | 0 | 0            | 0 | 0           | 0 | 0.000714463  | 0 |
| 0 | 0            | 0 | -0.039911656 | 0 | 0           | 0 | -0.021197451 | 0 |
| 0 | 0.072117109  | 0 | 0            | 0 | 0           | 0 | 0.002053599  | 0 |
| 0 | 0.054449439  | 0 | 0            | 0 | 0           | 0 | -0.007032199 | 0 |
| 0 | 0.05834228   | 0 | 0            | 0 | 0           | 0 | 0            | 0 |
| 0 | 0.072107356  | 0 | 0            | 0 | 0           | 0 | 0            | 0 |
| 0 | 0.064390305  | 0 | 0            | 0 | 0           | 0 | 0.000507111  | 0 |
| 0 | 0.06096692   | 0 | 0            | 0 | 0           | 0 | 0.001382571  | 0 |
| 0 | 0            | 0 | 0            | 0 | 0           | 0 | 0.002127398  | 0 |
| 0 | 0            | 0 | 0            | 0 | 0           | 0 | 0            | 0 |
| 0 | 0            | 0 | 0            | 0 | 0           | 0 | -0.006999135 | 0 |
| 0 | 0            | 0 | -0.039525319 | 0 | 0           | 0 | 0            | 0 |
| 0 | 0            | 0 | -0.042249528 | 0 | 0           | 0 | -0.021344803 | 0 |
| 0 | 0.060923127  | 0 | 0            | 0 | 0           | 0 | 0            | 0 |
| 0 | 0.047118631  | 0 | -0.064728605 | 0 | 0           | 0 | 0            | 0 |
| 0 | 0.070135977  | 0 | -0.064693688 | 0 | 0           | 0 | 0            | 0 |
| 0 | 0            | 0 | -0.041404361 | 0 | 0           | 0 | 0            | 0 |
| 0 | 0            | 0 | -0.064725698 | 0 | 0           | 0 | 0            | 0 |
| 0 | 0            | 0 | -0.037059158 | 0 | 0           | 0 | 0            | 0 |
| 0 | -0.021437329 | 0 | 0            | 0 | 0           | 0 | 0.003111374  | 0 |
| 0 | 0            | 0 | 0            | 0 | 0           | 0 | -0.01547791  | 0 |
| 0 | 0.061795595  | 0 | 0            | 0 | 0           | 0 | -0.006692763 | 0 |
| 0 | 0            | 0 | -0.039179937 | 0 | 0           | 0 | -0.02127813  | 0 |
| 0 | 0            | 0 | 0            | 0 | 0           | 0 | -0.01031318  | 0 |
| 0 | 0.051220501  | 0 | 0            | 0 | 0           | 0 | -0.006465058 | 0 |
| 0 | 0.064409853  | 0 | 0            | 0 | 0           | 0 | -0.006531069 | 0 |
| 0 | 0            | 0 | 0            | 0 | 0           | 0 | -0.006442182 | 0 |
| 0 | 0.0477015    | 0 | -0.06869785  | 0 | 0           | 0 | 0            | 0 |
| 0 | 0.063462529  | 0 | 0            | 0 | 0           | 0 | -0.006602192 | 0 |
| 0 | 0.063270527  | 0 | 0            | 0 | 0           | 0 | 0            | 0 |
| 0 | 0            | 0 | -0.039780599 | 0 | 0           | 0 | -0.021495872 | 0 |
| 0 | 0.050194714  | 0 | 0.17980276   | 0 | -0.25578864 | 0 | 0.05609552   | 0 |

|   |             |   |              |   |              |   |              |   |
|---|-------------|---|--------------|---|--------------|---|--------------|---|
| 0 | 0           | 0 | 0.1797648    | 0 | -0.25575875  | 0 | 0.056098513  | 0 |
| 0 | 0           | 0 | -0.039693737 | 0 | 0            | 0 | 0            | 0 |
| 0 | 0           | 0 | -0.04349982  | 0 | 0            | 0 | 0            | 0 |
| 0 | 0           | 0 | 0            | 0 | 0            | 0 | -0.025682307 | 0 |
| 0 | 0           | 0 | 0            | 0 | 0            | 0 | -0.026400683 | 0 |
| 0 | 0           | 0 | -0.048688402 | 0 | 0            | 0 | -0.014061287 | 0 |
| 0 | 0           | 0 | -0.042691459 | 0 | 0            | 0 | -0.018767549 | 0 |
| 0 | 0           | 0 | -0.055649723 | 0 | 0            | 0 | -0.014597048 | 0 |
| 0 | 0.04177743  | 0 | 0            | 0 | -0.08276209  | 0 | 0            | 0 |
| 0 | 0.029928507 | 0 | 0.17760884   | 0 | -0.24516567  | 0 | 0.054834756  | 0 |
| 0 | 0.075853017 | 0 | 0            | 0 | 0            | 0 | 0.007159225  | 0 |
| 0 | 0           | 0 | 0            | 0 | 0            | 0 | 0.007218638  | 0 |
| 0 | 0           | 0 | 0            | 0 | 0            | 0 | -0.021928558 | 0 |
| 0 | 0.060833367 | 0 | 0            | 0 | 0            | 0 | 0            | 0 |
| 0 | 0.060506891 | 0 | 0            | 0 | 0            | 0 | 0.00899559   | 0 |
| 0 | 0           | 0 | 0            | 0 | 0            | 0 | -0.022944592 | 0 |
| 0 | 0           | 0 | 0            | 0 | 0            | 0 | 0            | 0 |
| 0 | 0.061627363 | 0 | 0            | 0 | 0            | 0 | 0.016944745  | 0 |
| 0 | 0           | 0 | 0            | 0 | 0            | 0 | 0.01698217   | 0 |
| 0 | 0           | 0 | 0            | 0 | 0            | 0 | -0.0014111   | 0 |
| 0 | 0           | 0 | 0            | 0 | 0            | 0 | -0.023098416 | 0 |
| 0 | 0.053683288 | 0 | 0            | 0 | 0            | 0 | 0.01629874   | 0 |
| 0 | 0.055923878 | 0 | 0            | 0 | 0            | 0 | 0.01594927   | 0 |
| 0 | 0.042175193 | 0 | -0.061791673 | 0 | 0            | 0 | 0.027295362  | 0 |
| 0 | 0.059441061 | 0 | -0.062123403 | 0 | 0            | 0 | 0.027433787  | 0 |
| 0 | 0           | 0 | -0.06215177  | 0 | 0            | 0 | 0.027462923  | 0 |
| 0 | 0           | 0 | -0.077214447 | 0 | 0            | 0 | 0.01099629   | 0 |
| 0 | 0.056521324 | 0 | 0            | 0 | 0            | 0 | 0            | 0 |
| 0 | 0           | 0 | 0            | 0 | 0            | 0 | 0.001348127  | 0 |
| 0 | 0.030104938 | 0 | 0            | 0 | -0.079762782 | 0 | 0.051998477  | 0 |
| 0 | 0.045015574 | 0 | -0.068591826 | 0 | 0            | 0 | 0            | 0 |
| 0 | 0.10377485  | 0 | 0            | 0 | 0            | 0 | 0.020394844  | 0 |
| 0 | 0.061122294 | 0 | 0            | 0 | 0            | 0 | 0.020420813  | 0 |
| 0 | 0           | 0 | 0            | 0 | 0            | 0 | 0.020448341  | 0 |
| 0 | 0.064902265 | 0 | 0            | 0 | 0            | 0 | 0            | 0 |
| 0 | 0.033289865 | 0 | -0.06496144  | 0 | 0            | 0 | 0.053227876  | 0 |
| 0 | 0.064612452 | 0 | 0            | 0 | 0            | 0 | 0.030175609  | 0 |
| 0 | 0.057461922 | 0 | 0            | 0 | 0            | 0 | 0.037346883  | 0 |
| 0 | 0.030119211 | 0 | 0.13370628   | 0 | -0.2325402   | 0 | 0            | 0 |
| 0 | 0           | 0 | 0.20291734   | 0 | -0.25270751  | 0 | 0            | 0 |
| 0 | 0.02838996  | 0 | 0.20290172   | 0 | -0.25276356  | 0 | 0            | 0 |
| 0 | 0           | 0 | 0.20524518   | 0 | -0.25627584  | 0 | 0            | 0 |
| 0 | 0           | 0 | 0.20723921   | 0 | -0.26203843  | 0 | 0            | 0 |
| 0 | 0           | 0 | 0.20184807   | 0 | -0.2511553   | 0 | 0            | 0 |
| 0 | 0.057722149 | 0 | 0.20179611   | 0 | -0.25120502  | 0 | 0            | 0 |
| 0 | 0           | 0 | 0.20287364   | 0 | -0.25772461  | 0 | -0.005527829 | 0 |
| 0 | 0           | 0 | 0.20405718   | 0 | -0.2605375   | 0 | 0            | 0 |

|   |             |   |            |   |             |   |              |   |
|---|-------------|---|------------|---|-------------|---|--------------|---|
| 0 | 0           | 0 | 0.20609049 | 0 | -0.25968375 | 0 | 0            | 0 |
| 0 | 0.025349873 | 0 | 0.20316901 | 0 | -0.25633883 | 0 | 0            | 0 |
| 0 | 0           | 0 | 0.20315187 | 0 | -0.25642914 | 0 | 0            | 0 |
| 0 | 0.026851988 | 0 | 0.20952322 | 0 | -0.25995708 | 0 | 0            | 0 |
| 0 | 0           | 0 | 0.20950353 | 0 | -0.25991549 | 0 | 0            | 0 |
| 0 | 0           | 0 | 0.20326516 | 0 | -0.24345995 | 0 | 0            | 0 |
| 0 | 0.057048089 | 0 | 0.20328544 | 0 | -0.24346037 | 0 | 0            | 0 |
| 0 | 0.063823495 | 0 | 0.19729108 | 0 | -0.25532668 | 0 | 0            | 0 |
| 0 | 0           | 0 | 0.19722763 | 0 | -0.25534413 | 0 | 0            | 0 |
| 0 | 0           | 0 | 0.2033286  | 0 | -0.26053098 | 0 | -0.008180332 | 0 |
| 0 | 0           | 0 | 0.20506009 | 0 | -0.25991294 | 0 | 0            | 0 |
| 0 | 0           | 0 | 0.19987184 | 0 | -0.24034815 | 0 | -0.003830685 | 0 |
| 0 | 0           | 0 | 0.2098253  | 0 | -0.26454431 | 0 | -0.008518016 | 0 |
| 0 | 0           | 0 | 0.20056867 | 0 | -0.24107823 | 0 | 0            | 0 |
| 0 | -0.00283567 | 0 | 0.20056175 | 0 | -0.24114711 | 0 | 0            | 0 |
| 0 | 0.056606052 | 0 | 0.19980404 | 0 | -0.24028073 | 0 | -0.003828298 | 0 |
| 0 | 0.057800548 | 0 | 0.2004909  | 0 | -0.24106152 | 0 | 0            | 0 |
| 0 | 0           | 0 | 0.21147576 | 0 | -0.26411618 | 0 | 0            | 0 |
| 0 | 0           | 0 | 0.21079679 | 0 | -0.26633853 | 0 | 0            | 0 |
| 0 | 0           | 0 | 0.20416957 | 0 | -0.26216622 | 0 | 0            | 0 |
| 0 | 0.042723989 | 0 | 0.2041507  | 0 | -0.26229864 | 0 | 0            | 0 |
| 0 | 0           | 0 | 0.20520564 | 0 | -0.2560637  | 0 | 0            | 0 |
| 0 | 0.057117197 | 0 | 0.20522597 | 0 | -0.25607846 | 0 | 0            | 0 |
| 0 | 0.056753508 | 0 | 0.19905594 | 0 | -0.25226282 | 0 | 0            | 0 |
| 0 | 0           | 0 | 0.19901176 | 0 | -0.25231805 | 0 | 0            | 0 |
| 0 | 0           | 0 | 0.2029337  | 0 | -0.2582892  | 0 | -0.001655351 | 0 |
| 0 | 0           | 0 | 0.20325565 | 0 | -0.2584853  | 0 | 0            | 0 |
| 0 | 0.002982414 | 0 | 0.20319297 | 0 | -0.25840206 | 0 | 0            | 0 |
| 0 | 0.057335446 | 0 | 0.20288793 | 0 | -0.25837691 | 0 | -0.001654052 | 0 |
| 0 | 0.057934306 | 0 | 0.20320027 | 0 | -0.25856142 | 0 | 0            | 0 |
| 0 | 0           | 0 | 0.20512384 | 0 | -0.24958021 | 0 | 0            | 0 |
| 0 | 0.054663952 | 0 | 0.2051301  | 0 | -0.24959024 | 0 | 0            | 0 |
| 0 | 0           | 0 | 0.19724778 | 0 | -0.26689127 | 0 | 0            | 0 |
| 0 | 0.026455318 | 0 | 0.20590087 | 0 | -0.2607119  | 0 | 0            | 0 |
| 0 | 0.028896444 | 0 | 0.2059504  | 0 | -0.26188374 | 0 | 0            | 0 |
| 0 | 0.024197355 | 0 | 0.20636679 | 0 | -0.26039518 | 0 | -0.003258978 | 0 |
| 0 | 0           | 0 | 0.20588954 | 0 | -0.26080373 | 0 | 0            | 0 |
| 0 | 0           | 0 | 0.205945   | 0 | -0.26194312 | 0 | 0            | 0 |
| 0 | 0.046266816 | 0 | 0.19245561 | 0 | -0.25810458 | 0 | 0            | 0 |
| 0 | 0.05026945  | 0 | 0.2067647  | 0 | -0.26091889 | 0 | 0            | 0 |
| 0 | 0           | 0 | 0.2063519  | 0 | -0.26049283 | 0 | -0.003283403 | 0 |
| 0 | 0           | 0 | 0.19240352 | 0 | -0.2581212  | 0 | 0            | 0 |
| 0 | 0           | 0 | 0.20619334 | 0 | -0.24713345 | 0 | -0.006198738 | 0 |
| 0 | 0.054332576 | 0 | 0.20620315 | 0 | -0.2471204  | 0 | -0.006291211 | 0 |
| 0 | 0.054042886 | 0 | 0.19963622 | 0 | -0.2430968  | 0 | -0.005996176 | 0 |
| 0 | 0.010999009 | 0 | 0.20677083 | 0 | -0.24792364 | 0 | 0            | 0 |
| 0 | 0           | 0 | 0.19957149 | 0 | -0.24313125 | 0 | -0.005933588 | 0 |

|   |              |   |            |   |              |   |              |   |
|---|--------------|---|------------|---|--------------|---|--------------|---|
| 0 | 0            | 0 | 0.20242746 | 0 | -0.25609062  | 0 | 0            | 0 |
| 0 | 0.033818985  | 0 | 0.20241362 | 0 | -0.25622242  | 0 | 0            | 0 |
| 0 | 0.058303859  | 0 | 0.19310788 | 0 | -0.25556633  | 0 | 0.001614029  | 0 |
| 0 | 0.045193092  | 0 | 0.20027903 | 0 | -0.24392012  | 0 | 0            | 0 |
| 0 | 0.055992525  | 0 | 0.20030973 | 0 | -0.24402065  | 0 | 0            | 0 |
| 0 | 0.045853214  | 0 | 0.1926633  | 0 | -0.25543326  | 0 | 0            | 0 |
| 0 | 0            | 0 | 0.19305714 | 0 | -0.25559113  | 0 | 0.001670459  | 0 |
| 0 | 0            | 0 | 0.20024068 | 0 | -0.24403893  | 0 | 0            | 0 |
| 0 | 0            | 0 | 0.20764118 | 0 | -0.2642799   | 0 | -0.005826503 | 0 |
| 0 | 0            | 0 | 0.20686303 | 0 | -0.26560612  | 0 | -0.006172357 | 0 |
| 0 | 0            | 0 | 0.2078363  | 0 | -0.26421489  | 0 | 0            | 0 |
| 0 | 0            | 0 | 0.2049944  | 0 | -0.2567369   | 0 | 0.006532109  | 0 |
| 0 | 0.032348836  | 0 | 0.20499585 | 0 | -0.25689193  | 0 | 0.006552417  | 0 |
| 0 | -0.027164739 | 0 | 0.20387505 | 0 | -0.25544229  | 0 | 0            | 0 |
| 0 | 0.055064701  | 0 | 0.20195728 | 0 | -0.25695698  | 0 | -0.003289408 | 0 |
| 0 | 0.055736308  | 0 | 0.20209146 | 0 | -0.25700605  | 0 | 0            | 0 |
| 0 | 0.048157511  | 0 | 0.20227867 | 0 | -0.25742017  | 0 | 0            | 0 |
| 0 | 0            | 0 | 0.20189341 | 0 | -0.25699333  | 0 | -0.003225039 | 0 |
| 0 | 0            | 0 | 0.20202288 | 0 | -0.25703874  | 0 | 0            | 0 |
| 0 | 0            | 0 | 0.20074149 | 0 | -0.24886469  | 0 | 0.002029894  | 0 |
| 0 | 0            | 0 | 0.20523328 | 0 | -0.26892867  | 0 | 0            | 0 |
| 0 | 0            | 0 | 0.20529731 | 0 | -0.26921733  | 0 | -0.001230536 | 0 |
| 0 | -0.012584591 | 0 | 0.20038985 | 0 | -0.24857599  | 0 | 0            | 0 |
| 0 | 0.055114542  | 0 | 0.20066648 | 0 | -0.24887312  | 0 | 0.002034372  | 0 |
| 0 | 0.052004674  | 0 | 0.20162793 | 0 | -0.24997119  | 0 | -0.004051507 | 0 |
| 0 | 0            | 0 | 0.20156942 | 0 | -0.25000479  | 0 | -0.003996862 | 0 |
| 0 | 0.048475585  | 0 | 0.20204888 | 0 | -0.25047282  | 0 | 0            | 0 |
| 0 | 0            | 0 | 0.20415895 | 0 | -0.26421488  | 0 | 0.001422248  | 0 |
| 0 | 0.04844125   | 0 | 0.2034478  | 0 | -0.24809138  | 0 | -0.003851101 | 0 |
| 0 | 0            | 0 | 0.19241462 | 0 | -0.26555574  | 0 | 0.00255295   | 0 |
| 0 | -0.025186244 | 0 | 0.20258167 | 0 | -0.24561812  | 0 | 0.005382066  | 0 |
| 0 | 0.033653311  | 0 | 0.18755487 | 0 | -0.24830509  | 0 | 0.016312692  | 0 |
| 0 | 0            | 0 | 0.18752523 | 0 | -0.24834886  | 0 | 0.016315236  | 0 |
| 0 | 0.061804812  | 0 | 0.1941513  | 0 | -0.26839086  | 0 | 0.011131614  | 0 |
| 0 | 0.044761469  | 0 | 0.1939283  | 0 | -0.26811251  | 0 | 0.011182191  | 0 |
| 0 | 0.061307743  | 0 | 0.19394144 | 0 | -0.26816892  | 0 | 0.011184478  | 0 |
| 0 | 0            | 0 | 0.19410262 | 0 | -0.26841402  | 0 | 0.011192401  | 0 |
| 0 | 0            | 0 | 0.19388478 | 0 | -0.26814259  | 0 | 0.01121716   | 0 |
| 0 | 0.062086308  | 0 | 0.19110949 | 0 | -0.26757021  | 0 | 0            | 0 |
| 0 | 0.046165284  | 0 | 0.19087567 | 0 | -0.26722298  | 0 | 0            | 0 |
| 0 | 0.046264719  | 0 | 0.1909902  | 0 | -0.26883289  | 0 | 0            | 0 |
| 0 | 0            | 0 | 0.19104696 | 0 | -0.2675489   | 0 | 0            | 0 |
| 0 | 0            | 0 | 0          | 0 | -0.05298578  | 0 | 0            | 0 |
| 0 | 0.026056526  | 0 | 0          | 0 | -0.05305317  | 0 | 0            | 0 |
| 0 | 0            | 0 | 0.19809768 | 0 | -0.25192516  | 0 | -0.018717051 | 0 |
| 0 | 0            | 0 | 0          | 0 | -0.055329303 | 0 | 0            | 0 |
| 0 | 0.028463922  | 0 | 0          | 0 | -0.055362771 | 0 | 0            | 0 |

|   |             |   |            |   |              |   |              |   |
|---|-------------|---|------------|---|--------------|---|--------------|---|
| 0 | 0           | 0 | 0          | 0 | -0.058214284 | 0 | 0            | 0 |
| 0 | 0.034696378 | 0 | 0          | 0 | -0.05829663  | 0 | 0            | 0 |
| 0 | 0.042905164 | 0 | 0.18108758 | 0 | -0.24314064  | 0 | 0            | 0 |
| 0 | 0.029708592 | 0 | 0.18107937 | 0 | -0.24324442  | 0 | 0            | 0 |
| 0 | 0           | 0 | 0.18105511 | 0 | -0.24329734  | 0 | 0            | 0 |
| 0 | 0           | 0 | 0          | 0 | -0.056320502 | 0 | 0            | 0 |
| 0 | 0           | 0 | 0          | 0 | -0.06118538  | 0 | 0            | 0 |
| 0 | 0           | 0 | 0          | 0 | -0.055173892 | 0 | -0.005112836 | 0 |
| 0 | 0.028206951 | 0 | 0          | 0 | -0.055242799 | 0 | -0.005101436 | 0 |
| 0 | 0           | 0 | 0.20105989 | 0 | -0.2437663   | 0 | -0.021478229 | 0 |
| 0 | 0           | 0 | 0.18777537 | 0 | -0.25412915  | 0 | 0.014433414  | 0 |
| 0 | 0           | 0 | 0          | 0 | -0.053626617 | 0 | 0            | 0 |
| 0 | 0.001725259 | 0 | 0          | 0 | -0.055412097 | 0 | 0            | 0 |
| 0 | 0.06163265  | 0 | 0          | 0 | -0.053729994 | 0 | 0            | 0 |
| 0 | 0           | 0 | 0          | 0 | -0.059551345 | 0 | -0.012072709 | 0 |
| 0 | 0           | 0 | 0          | 0 | -0.056624915 | 0 | -0.007207553 | 0 |
| 0 | 0           | 0 | 0          | 0 | -0.055274225 | 0 | -0.008814644 | 0 |
| 0 | 0.060714136 | 0 | 0.1851383  | 0 | -0.2394699   | 0 | 0.014707492  | 0 |
| 0 | 0           | 0 | 0.18509898 | 0 | -0.23949933  | 0 | 0.014761477  | 0 |
| 0 | 0.054812273 | 0 | 0          | 0 | -0.055370282 | 0 | -0.008820277 | 0 |
| 0 | 0.044165593 | 0 | 0          | 0 | -0.066428718 | 0 | 0            | 0 |
| 0 | 0           | 0 | 0          | 0 | -0.057639883 | 0 | 0            | 0 |
| 0 | 0           | 0 | 0          | 0 | -0.066487573 | 0 | 0            | 0 |
| 0 | 0           | 0 | 0          | 0 | -0.055785441 | 0 | 0            | 0 |
| 0 | 0.014109948 | 0 | 0          | 0 | -0.054970926 | 0 | 0            | 0 |
| 0 | 0.057702244 | 0 | 0          | 0 | -0.0557803   | 0 | 0            | 0 |
| 0 | 0.03930778  | 0 | 0.18495119 | 0 | -0.23642231  | 0 | 0.015501747  | 0 |
| 0 | 0           | 0 | 0          | 0 | -0.062104014 | 0 | -0.008641661 | 0 |
| 0 | 0           | 0 | 0.2017855  | 0 | -0.2549084   | 0 | 0            | 0 |
| 0 | 0.023143726 | 0 | 0          | 0 | -0.056218379 | 0 | 0            | 0 |
| 0 | 0           | 0 | 0.20244424 | 0 | -0.25102331  | 0 | -0.018926234 | 0 |
| 0 | 0           | 0 | 0.20217316 | 0 | -0.25414263  | 0 | 0            | 0 |
| 0 | 0           | 0 | 0          | 0 | -0.056306798 | 0 | 0            | 0 |
| 0 | 0           | 0 | 0.1968214  | 0 | -0.24338395  | 0 | -0.015305594 | 0 |
| 0 | 0.024808659 | 0 | 0          | 0 | -0.058352289 | 0 | -0.006942098 | 0 |
| 0 | 0           | 0 | 0          | 0 | -0.058453788 | 0 | -0.006958733 | 0 |
| 0 | 0           | 0 | 0.20353686 | 0 | -0.25577558  | 0 | -0.019089175 | 0 |
| 0 | 0           | 0 | 0.19727665 | 0 | -0.25186678  | 0 | -0.018780554 | 0 |
| 0 | 0           | 0 | 0          | 0 | -0.058889641 | 0 | -0.009720623 | 0 |
| 0 | 0.03043786  | 0 | 0          | 0 | -0.060308609 | 0 | 0            | 0 |
| 0 | 0.061651894 | 0 | 0          | 0 | -0.063000786 | 0 | -0.005411503 | 0 |
| 0 | 0           | 0 | 0          | 0 | -0.06037064  | 0 | 0            | 0 |
| 0 | 0.046018798 | 0 | 0          | 0 | -0.058629237 | 0 | 0            | 0 |
| 0 | 0           | 0 | 0          | 0 | -0.06306877  | 0 | -0.005348409 | 0 |
| 0 | 0.062476735 | 0 | 0          | 0 | -0.060892713 | 0 | 0            | 0 |
| 0 | 0           | 0 | 0.20277894 | 0 | -0.24926838  | 0 | 0            | 0 |
| 0 | 0           | 0 | 0          | 0 | -0.04592996  | 0 | -0.009586163 | 0 |

|   |              |   |            |   |              |   |              |   |
|---|--------------|---|------------|---|--------------|---|--------------|---|
| 0 | 0.044847995  | 0 | 0          | 0 | -0.062251036 | 0 | 0            | 0 |
| 0 | 0            | 0 | 0          | 0 | -0.06100096  | 0 | 0            | 0 |
| 0 | 0.053857489  | 0 | 0          | 0 | -0.045907778 | 0 | -0.009679234 | 0 |
| 0 | 0            | 0 | 0          | 0 | -0.062720236 | 0 | 0            | 0 |
| 0 | 0.042015646  | 0 | 0.17940574 | 0 | -0.23559285  | 0 | 0            | 0 |
| 0 | 0.010170853  | 0 | 0          | 0 | -0.046325407 | 0 | 0            | 0 |
| 0 | 0            | 0 | 0          | 0 | -0.046117776 | 0 | 0            | 0 |
| 0 | 0.057143115  | 0 | 0          | 0 | -0.046144001 | 0 | 0            | 0 |
| 0 | 0            | 0 | 0.19793686 | 0 | -0.24654431  | 0 | -0.01857312  | 0 |
| 0 | 0.026301735  | 0 | 0          | 0 | -0.056015457 | 0 | -0.006916298 | 0 |
| 0 | 0            | 0 | 0          | 0 | -0.055993375 | 0 | -0.006889336 | 0 |
| 0 | 0            | 0 | 0          | 0 | -0.046501001 | 0 | -0.005912444 | 0 |
| 0 | -0.002316678 | 0 | 0          | 0 | -0.046369086 | 0 | -0.005918746 | 0 |
| 0 | 0            | 0 | 0          | 0 | -0.060791813 | 0 | -0.009595138 | 0 |
| 0 | 0            | 0 | 0          | 0 | -0.058563757 | 0 | 0            | 0 |
| 0 | 0            | 0 | 0          | 0 | -0.057141804 | 0 | 0            | 0 |
| 0 | 0.029835481  | 0 | 0          | 0 | -0.057171634 | 0 | 0            | 0 |
| 0 | 0.032874156  | 0 | 0          | 0 | -0.058566072 | 0 | 0            | 0 |
| 0 | 0.055680191  | 0 | 0          | 0 | -0.04655872  | 0 | -0.005908198 | 0 |
| 0 | -0.00014805  | 0 | 0          | 0 | -0.046712483 | 0 | 0            | 0 |
| 0 | 0.013020831  | 0 | 0          | 0 | -0.056307964 | 0 | 0            | 0 |
| 0 | 0            | 0 | 0.20408225 | 0 | -0.25647142  | 0 | 0            | 0 |
| 0 | 0            | 0 | 0.19945293 | 0 | -0.25919648  | 0 | -0.013026505 | 0 |
| 0 | 0.054577655  | 0 | 0          | 0 | -0.059187563 | 0 | -0.006803178 | 0 |
| 0 | 0            | 0 | 0          | 0 | -0.059283468 | 0 | -0.006733972 | 0 |
| 0 | 0.044113734  | 0 | 0          | 0 | -0.059546328 | 0 | 0            | 0 |
| 0 | 0            | 0 | 0.19950004 | 0 | -0.25552322  | 0 | 0            | 0 |
| 0 | 0            | 0 | 0          | 0 | -0.063715248 | 0 | -0.001881787 | 0 |
| 0 | 0.045765434  | 0 | 0          | 0 | -0.069329015 | 0 | 0.000544157  | 0 |
| 0 | 0.04378258   | 0 | 0          | 0 | -0.069390386 | 0 | 0            | 0 |
| 0 | 0            | 0 | 0          | 0 | -0.063568465 | 0 | 0            | 0 |
| 0 | 0.000624549  | 0 | 0          | 0 | -0.063627922 | 0 | 0            | 0 |
| 0 | 0.043671555  | 0 | 0          | 0 | -0.063866474 | 0 | -0.001850087 | 0 |
| 0 | 0            | 0 | 0          | 0 | -0.06938731  | 0 | 0.000574573  | 0 |
| 0 | 0.043685023  | 0 | 0          | 0 | -0.063715279 | 0 | 0            | 0 |
| 0 | 0            | 0 | 0          | 0 | -0.059116842 | 0 | -0.009731226 | 0 |
| 0 | 0            | 0 | 0          | 0 | -0.057401974 | 0 | -0.006741623 | 0 |
| 0 | 0            | 0 | 0          | 0 | -0.061317361 | 0 | -0.010052831 | 0 |
| 0 | 0            | 0 | 0.19144745 | 0 | -0.25774963  | 0 | -0.013237382 | 0 |
| 0 | 0.054842265  | 0 | 0          | 0 | -0.057390677 | 0 | -0.006832057 | 0 |
| 0 | 0            | 0 | 0.19965918 | 0 | -0.25494698  | 0 | -0.016536304 | 0 |
| 0 | 0            | 0 | 0          | 0 | -0.057572759 | 0 | 0            | 0 |
| 0 | 0.012920797  | 0 | 0          | 0 | -0.057792711 | 0 | 0            | 0 |
| 0 | 0.056606372  | 0 | 0          | 0 | -0.057555841 | 0 | 0            | 0 |
| 0 | 0            | 0 | 0          | 0 | -0.074071966 | 0 | -0.004261493 | 0 |
| 0 | 0            | 0 | 0          | 0 | -0.059205952 | 0 | 0            | 0 |
| 0 | 0.043452288  | 0 | 0          | 0 | -0.066640011 | 0 | -0.001172529 | 0 |

|   |              |   |              |   |              |   |              |   |
|---|--------------|---|--------------|---|--------------|---|--------------|---|
| 0 | 0            | 0 | 0            | 0 | -0.061283089 | 0 | -0.003478394 | 0 |
| 0 | 0.003621835  | 0 | 0            | 0 | -0.061360676 | 0 | -0.003475127 | 0 |
| 0 | 0.004682032  | 0 | 0            | 0 | -0.060988026 | 0 | 0            | 0 |
| 0 | 0.056323708  | 0 | 0            | 0 | -0.061408135 | 0 | -0.003474773 | 0 |
| 0 | 0            | 0 | 0            | 0 | -0.050974523 | 0 | -0.007509756 | 0 |
| 0 | 0.051814165  | 0 | 0            | 0 | -0.050974542 | 0 | -0.007594787 | 0 |
| 0 | 0.053469817  | 0 | 0            | 0 | -0.049527661 | 0 | -0.007438062 | 0 |
| 0 | 0.044933338  | 0 | 0            | 0 | -0.049248952 | 0 | -0.007445371 | 0 |
| 0 | 0.012377584  | 0 | 0            | 0 | -0.051244625 | 0 | 0            | 0 |
| 0 | 0            | 0 | 0            | 0 | -0.04961146  | 0 | -0.007372684 | 0 |
| 0 | 0.043775481  | 0 | 0            | 0 | -0.049855476 | 0 | 0            | 0 |
| 0 | 0.027291202  | 0 | 0            | 0 | -0.060612558 | 0 | -0.004803185 | 0 |
| 0 | 0.031062901  | 0 | 0            | 0 | -0.062312753 | 0 | -0.004503062 | 0 |
| 0 | 0            | 0 | 0            | 0 | -0.060709359 | 0 | -0.004813523 | 0 |
| 0 | 0.031552029  | 0 | 0            | 0 | -0.062083122 | 0 | 0            | 0 |
| 0 | 0            | 0 | 0            | 0 | -0.062378055 | 0 | -0.004504755 | 0 |
| 0 | 0.047276041  | 0 | 0            | 0 | -0.060773531 | 0 | 0            | 0 |
| 0 | 0            | 0 | 0            | 0 | -0.059445463 | 0 | 0.001617653  | 0 |
| 0 | 0            | 0 | 0            | 0 | -0.062146453 | 0 | 0            | 0 |
| 0 | -0.01258536  | 0 | 0            | 0 | -0.059432495 | 0 | 0            | 0 |
| 0 | 0.046867931  | 0 | 0            | 0 | -0.062491057 | 0 | 0            | 0 |
| 0 | 0.035591767  | 0 | 0            | 0 | -0.059586236 | 0 | 0.001640573  | 0 |
| 0 | 0.047934379  | 0 | 0            | 0 | -0.059606394 | 0 | -0.00471089  | 0 |
| 0 | 0.010461414  | 0 | 0            | 0 | -0.047197572 | 0 | -0.007427474 | 0 |
| 0 | 0            | 0 | 0.19243485   | 0 | -0.27997177  | 0 | 0.012071396  | 0 |
| 0 | 0            | 0 | -0.035881412 | 0 | 0            | 0 | 0            | 0 |
| 0 | 0.033077201  | 0 | -0.035962494 | 0 | 0            | 0 | 0            | 0 |
| 0 | 0            | 0 | -0.038746618 | 0 | 0            | 0 | 0            | 0 |
| 0 | 0.03669873   | 0 | -0.038787908 | 0 | 0            | 0 | 0            | 0 |
| 0 | 0            | 0 | -0.036133424 | 0 | 0            | 0 | 0            | 0 |
| 0 | 0.063271893  | 0 | -0.036240838 | 0 | 0            | 0 | 0            | 0 |
| 0 | 0            | 0 | 0            | 0 | -0.062519474 | 0 | -0.0075869   | 0 |
| 0 | 0.053853935  | 0 | 0            | 0 | -0.061104819 | 0 | -0.004736403 | 0 |
| 0 | 0            | 0 | -0.038779645 | 0 | 0            | 0 | -0.006199956 | 0 |
| 0 | 0.035994132  | 0 | -0.038862312 | 0 | 0            | 0 | -0.00618517  | 0 |
| 0 | 0            | 0 | 0            | 0 | -0.061203893 | 0 | -0.004669157 | 0 |
| 0 | 0.046018186  | 0 | 0            | 0 | -0.061523309 | 0 | -0.004562538 | 0 |
| 0 | -0.009800659 | 0 | 0            | 0 | -0.05436131  | 0 | 6.47E-07     | 0 |
| 0 | 0.045401163  | 0 | 0            | 0 | -0.061347395 | 0 | 0            | 0 |
| 0 | -0.02237863  | 0 | 0            | 0 | -0.057381332 | 0 | 0.004536254  | 0 |
| 0 | 0            | 0 | -0.040117373 | 0 | 0            | 0 | 0            | 0 |
| 0 | 0.039967706  | 0 | -0.040220593 | 0 | 0            | 0 | 0            | 0 |
| 0 | 0.003289697  | 0 | -0.038978108 | 0 | 0            | 0 | 0            | 0 |
| 0 | 0            | 0 | -0.039822162 | 0 | 0            | 0 | 0            | 0 |
| 0 | 0            | 0 | 0            | 0 | -0.069458361 | 0 | -0.003303005 | 0 |
| 0 | 0.046558536  | 0 | 0            | 0 | -0.054740984 | 0 | -0.00538765  | 0 |
| 0 | 0            | 0 | -0.038036848 | 0 | 0            | 0 | -0.008672002 | 0 |



|   |              |   |              |   |              |   |              |   |
|---|--------------|---|--------------|---|--------------|---|--------------|---|
| 0 | 0            | 0 | -0.040351704 | 0 | 0            | 0 | -0.008902405 | 0 |
| 0 | 0.056210905  | 0 | -0.038135648 | 0 | 0            | 0 | -0.008684134 | 0 |
| 0 | 0            | 0 | -0.04323114  | 0 | 0            | 0 | 0            | 0 |
| 0 | 0            | 0 | -0.031923548 | 0 | 0            | 0 | -0.0104561   | 0 |
| 0 | 0.054884168  | 0 | -0.031900213 | 0 | 0            | 0 | -0.010547774 | 0 |
| 0 | 0            | 0 | -0.036752759 | 0 | 0            | 0 | 0            | 0 |
| 0 | 0.010705954  | 0 | -0.037641275 | 0 | 0            | 0 | 0            | 0 |
| 0 | 0.058710562  | 0 | -0.036745757 | 0 | 0            | 0 | 0            | 0 |
| 0 | 0            | 0 | -0.030191239 | 0 | 0            | 0 | 0            | 0 |
| 0 | 0            | 0 | -0.038080317 | 0 | 0            | 0 | 0            | 0 |
| 0 | 0            | 0 | -0.044151212 | 0 | 0            | 0 | -0.014146398 | 0 |
| 0 | 0.059496781  | 0 | -0.030211791 | 0 | 0            | 0 | 0            | 0 |
| 0 | 0.012034812  | 0 | -0.032273394 | 0 | 0            | 0 | 0            | 0 |
| 0 | 0            | 0 | -0.030802633 | 0 | 0            | 0 | -0.00672843  | 0 |
| 0 | 0.057771706  | 0 | -0.030863779 | 0 | 0            | 0 | -0.006722232 | 0 |
| 0 | -0.000679382 | 0 | -0.03248687  | 0 | 0            | 0 | -0.006721499 | 0 |
| 0 | 0.030168534  | 0 | -0.039338131 | 0 | 0            | 0 | 0            | 0 |
| 0 | 0            | 0 | -0.03942752  | 0 | 0            | 0 | 0            | 0 |
| 0 | 4.81E-05     | 0 | -0.030950486 | 0 | 0            | 0 | 0            | 0 |
| 0 | 0.032631815  | 0 | -0.0421644   | 0 | 0            | 0 | -0.007851994 | 0 |
| 0 | 0.033434262  | 0 | 0            | 0 | -0.064820373 | 0 | 0.012865447  | 0 |
| 0 | 0.03964307   | 0 | 0            | 0 | -0.065003882 | 0 | 0.01274776   | 0 |
| 0 | 0            | 0 | 0            | 0 | -0.064882891 | 0 | 0.012874021  | 0 |
| 0 | 0            | 0 | -0.042266189 | 0 | 0            | 0 | -0.007855914 | 0 |
| 0 | 0            | 0 | -0.044442684 | 0 | 0            | 0 | -0.009175447 | 0 |
| 0 | 0.033017791  | 0 | -0.041387096 | 0 | 0            | 0 | 0            | 0 |
| 0 | 0.050668383  | 0 | 0.18325364   | 0 | -0.25638142  | 0 | 0.030237969  | 0 |
| 0 | 0.051387595  | 0 | -0.050076307 | 0 | 0            | 0 | 0            | 0 |
| 0 | 0.050040745  | 0 | -0.04239297  | 0 | 0            | 0 | 0            | 0 |
| 0 | 0            | 0 | -0.042764538 | 0 | 0            | 0 | -0.011537951 | 0 |
| 0 | 0            | 0 | 0.18321155   | 0 | -0.25637762  | 0 | 0.030261001  | 0 |
| 0 | 0            | 0 | -0.041453325 | 0 | 0            | 0 | 0            | 0 |
| 0 | 0            | 0 | -0.05013667  | 0 | 0            | 0 | 0            | 0 |
| 0 | 0.06299199   | 0 | -0.042119481 | 0 | 0            | 0 | 0            | 0 |
| 0 | 0            | 0 | -0.042230737 | 0 | 0            | 0 | 0            | 0 |
| 0 | 0.040397385  | 0 | 0.18263819   | 0 | -0.25278083  | 0 | 0.028798174  | 0 |
| 0 | 0            | 0 | -0.039152497 | 0 | 0            | 0 | -0.007889899 | 0 |
| 0 | 0.03433895   | 0 | -0.039185317 | 0 | 0            | 0 | -0.007930675 | 0 |
| 0 | 0.06401212   | 0 | -0.047794153 | 0 | 0            | 0 | -0.004087966 | 0 |
| 0 | 0            | 0 | -0.047866678 | 0 | 0            | 0 | -0.004025761 | 0 |
| 0 | 0.045603823  | 0 | -0.047212015 | 0 | 0            | 0 | 0            | 0 |
| 0 | 0            | 0 | -0.043377948 | 0 | 0            | 0 | 0            | 0 |
| 0 | 0            | 0 | -0.039965608 | 0 | 0            | 0 | 0            | 0 |
| 0 | 0.03763834   | 0 | -0.040006668 | 0 | 0            | 0 | 0            | 0 |
| 0 | 0            | 0 | -0.038925363 | 0 | 0            | 0 | 0            | 0 |
| 0 | 0.016812706  | 0 | -0.03945811  | 0 | 0            | 0 | 0            | 0 |
| 0 | 0.035612351  | 0 | -0.03891631  | 0 | 0            | 0 | 0            | 0 |

|   |              |   |              |   |              |   |              |   |
|---|--------------|---|--------------|---|--------------|---|--------------|---|
| 0 | 0.040855626  | 0 | 0            | 0 | -0.066007878 | 0 | 0            | 0 |
| 0 | 0            | 0 | -0.041765025 | 0 | 0            | 0 | -0.010925222 | 0 |
| 0 | 0.042563458  | 0 | 0            | 0 | -0.078357221 | 0 | 0.00835308   | 0 |
| 0 | 0.042574403  | 0 | 0            | 0 | -0.078474447 | 0 | 0.008438118  | 0 |
| 0 | 0.060667064  | 0 | 0            | 0 | -0.078382937 | 0 | 0.008346605  | 0 |
| 0 | 0.055132596  | 0 | -0.040635434 | 0 | 0            | 0 | -0.007886223 | 0 |
| 0 | 0            | 0 | 0            | 0 | 0            | 0 | 0            | 0 |
| 0 | 0.043353641  | 0 | 0            | 0 | 0            | 0 | 0            | 0 |
| 0 | 0            | 0 | 0            | 0 | -0.078407724 | 0 | 0.008379268  | 0 |
| 0 | 0            | 0 | -0.040733537 | 0 | 0            | 0 | -0.007824673 | 0 |
| 0 | 0.048409616  | 0 | -0.040954518 | 0 | 0            | 0 | 0            | 0 |
| 0 | 0.055399572  | 0 | -0.034055541 | 0 | 0            | 0 | -0.008343236 | 0 |
| 0 | 0.043645193  | 0 | 0            | 0 | -0.079914813 | 0 | 0            | 0 |
| 0 | 0            | 0 | -0.034145153 | 0 | 0            | 0 | -0.008280881 | 0 |
| 0 | 0.049520193  | 0 | -0.035562495 | 0 | 0            | 0 | -0.008174134 | 0 |
| 0 | 0            | 0 | -0.0355827   | 0 | 0            | 0 | -0.008308779 | 0 |
| 0 | 0            | 0 | -0.038110092 | 0 | 0            | 0 | -0.00791875  | 0 |
| 0 | 0.053478931  | 0 | -0.035582981 | 0 | 0            | 0 | -0.008392544 | 0 |
| 0 | 0.055438597  | 0 | -0.038095397 | 0 | 0            | 0 | -0.008007684 | 0 |
| 0 | 0            | 0 | 0            | 0 | 0            | 0 | 0            | 0 |
| 0 | 0.046153082  | 0 | -0.034348194 | 0 | 0            | 0 | 0            | 0 |
| 0 | 0            | 0 | 0            | 0 | 0            | 0 | -0.006879986 | 0 |
| 0 | 0            | 0 | -0.038111607 | 0 | 0            | 0 | 0            | 0 |
| 0 | 0.049999049  | 0 | 0            | 0 | 0            | 0 | 0            | 0 |
| 0 | 0.057140454  | 0 | -0.038094474 | 0 | 0            | 0 | 0            | 0 |
| 0 | 0.043825409  | 0 | 0            | 0 | 0            | 0 | -0.006872333 | 0 |
| 0 | 0.01316669   | 0 | -0.03849356  | 0 | 0            | 0 | 0            | 0 |
| 0 | 0.013616071  | 0 | -0.035820013 | 0 | 0            | 0 | 0            | 0 |
| 0 | 0            | 0 | -0.039314208 | 0 | 0            | 0 | -0.011172737 | 0 |
| 0 | 0            | 0 | 0            | 0 | 0            | 0 | -0.012056178 | 0 |
| 0 | 0.012389389  | 0 | -0.032935003 | 0 | 0            | 0 | -0.008232579 | 0 |
| 0 | 0.059641523  | 0 | 0            | 0 | 0            | 0 | -0.012152356 | 0 |
| 0 | -0.001804281 | 0 | 0            | 0 | 0            | 0 | 0            | 0 |
| 0 | 0            | 0 | 0            | 0 | -0.058875238 | 0 | -0.021965423 | 0 |
| 0 | 0            | 0 | 0            | 0 | 0            | 0 | -0.010087433 | 0 |
| 0 | 0            | 0 | 0            | 0 | -0.056819337 | 0 | -0.02229057  | 0 |
| 0 | 0.063953647  | 0 | 0            | 0 | 0            | 0 | -0.010109268 | 0 |
| 0 | 0.038746369  | 0 | 0            | 0 | -0.058894019 | 0 | 0.01128832   | 0 |
| 0 | 0            | 0 | 0            | 0 | 0            | 0 | 0            | 0 |
| 0 | 0.036048799  | 0 | 0            | 0 | 0            | 0 | 0            | 0 |
| 0 | 0            | 0 | -0.039225994 | 0 | 0            | 0 | 0            | 0 |
| 0 | 0            | 0 | 0            | 0 | 0            | 0 | 0            | 0 |
| 0 | 0.06538722   | 0 | 0            | 0 | 0            | 0 | 0            | 0 |
| 0 | 0            | 0 | -0.045598285 | 0 | 0            | 0 | 0            | 0 |
| 0 | 0            | 0 | -0.045818761 | 0 | 0            | 0 | -0.001633699 | 0 |
| 0 | 0            | 0 | -0.045050012 | 0 | 0            | 0 | -0.011943804 | 0 |
| 0 | -0.002820762 | 0 | -0.045719965 | 0 | 0            | 0 | 0            | 0 |

|   |              |   |              |              |   |              |   |
|---|--------------|---|--------------|--------------|---|--------------|---|
| 0 | 0.00768447   | 0 | 0            | 0            | 0 | 0            | 0 |
| 0 | 0.04980861   | 0 | -0.045767064 | 0            | 0 | 0            | 0 |
| 0 | 0.012549901  | 0 | 0            | 0            | 0 | 0            | 0 |
| 0 | 0.050101599  | 0 | -0.045990448 | 0            | 0 | -0.001601421 | 0 |
| 0 | 0            | 0 | -0.044340769 | 0            | 0 | -0.002623705 | 0 |
| 0 | -0.001029977 | 0 | -0.044459707 | 0            | 0 | -0.0026286   | 0 |
| 0 | -0.000211473 | 0 | -0.044092336 | 0            | 0 | 0            | 0 |
| 0 | 0.057712096  | 0 | -0.044470009 | 0            | 0 | -0.002628078 | 0 |
| 0 | 0            | 0 | 0            | 0            | 0 | -0.011739259 | 0 |
| 0 | 0            | 0 | 0            | -0.050798787 | 0 | -0.022195611 | 0 |
| 0 | 0.056502871  | 0 | 0            | 0            | 0 | -0.011823591 | 0 |
| 0 | 0            | 0 | 0            | 0            | 0 | -0.015127673 | 0 |
| 0 | -0.003307582 | 0 | 0            | 0            | 0 | -0.007307149 | 0 |
| 0 | 0            | 0 | 0            | 0            | 0 | -0.011573448 | 0 |
| 0 | 0.049563874  | 0 | 0            | 0            | 0 | -0.011641659 | 0 |
| 0 | 0            | 0 | 0            | 0            | 0 | -0.017372283 | 0 |
| 0 | 0.053065906  | 0 | -0.053201941 | 0            | 0 | 0.001398891  | 0 |
| 0 | 0.047263985  | 0 | -0.053375439 | 0            | 0 | 0            | 0 |
| 0 | 0            | 0 | -0.053259892 | 0            | 0 | 0.001436118  | 0 |
| 0 | 0.016730109  | 0 | 0            | 0            | 0 | -0.011605469 | 0 |
| 0 | 0.046942503  | 0 | -0.051841573 | 0            | 0 | 0.000502952  | 0 |
| 0 | 0            | 0 | -0.042667244 | 0            | 0 | 0.001072135  | 0 |
| 0 | -0.012871572 | 0 | -0.042670844 | 0            | 0 | 0            | 0 |
| 0 | 0            | 0 | 0            | 0            | 0 | 0            | 0 |
| 0 | 0.043454225  | 0 | -0.042827144 | 0            | 0 | 0.001100341  | 0 |
| 0 | 0.034790614  | 0 | -0.043882191 | 0            | 0 | -0.005602766 | 0 |
| 0 | 0.014902531  | 0 | 0            | 0            | 0 | 0            | 0 |
| 0 | 0            | 0 | -0.043980865 | 0            | 0 | -0.005601015 | 0 |
| 0 | 0.033755079  | 0 | -0.042745938 | 0            | 0 | 0            | 0 |
| 0 | 0.05220567   | 0 | -0.043116785 | 0            | 0 | -0.00553745  | 0 |
| 0 | 0.033521398  | 0 | -0.04315297  | 0            | 0 | -0.005483702 | 0 |
| 0 | 0.051360775  | 0 | -0.044011747 | 0            | 0 | 0            | 0 |
| 0 | 0.017578034  | 0 | 0            | 0            | 0 | 0            | 0 |
| 0 | 0            | 0 | -0.04281305  | 0            | 0 | 0            | 0 |
| 0 | 0            | 0 | -0.043221531 | 0            | 0 | -0.005487592 | 0 |
| 0 | 0.051266006  | 0 | -0.043313359 | 0            | 0 | 0            | 0 |
| 0 | 0            | 0 | 0            | 0            | 0 | -0.006280441 | 0 |
| 0 | 0.049143066  | 0 | 0            | 0            | 0 | -0.006273003 | 0 |
| 0 | 0.00263409   | 0 | 0            | 0            | 0 | -0.007245209 | 0 |
| 0 | -0.011001735 | 0 | -0.039461029 | 0            | 0 | 4.95E-07     | 0 |
| 0 | -8.30E-05    | 0 | 0            | 0            | 0 | 0            | 0 |
| 0 | 0.001178619  | 0 | 0            | 0            | 0 | -0.007231444 | 0 |
| 0 | 0            | 0 | 0            | -0.061181236 | 0 | -0.020559739 | 0 |
| 0 | -0.021851264 | 0 | -0.040763768 | 0            | 0 | 0.003712366  | 0 |
| 0 | 0            | 0 | -0.058579433 | 0            | 0 | -0.003766534 | 0 |
| 0 | 0            | 0 | 0            | -0.057671687 | 0 | -0.019934499 | 0 |
| 0 | 0.053902141  | 0 | -0.042101235 | 0            | 0 | -0.0057836   | 0 |

|   |             |   |              |   |              |   |              |   |
|---|-------------|---|--------------|---|--------------|---|--------------|---|
| 0 | 0           | 0 | 0            | 0 | -0.058958627 | 0 | 0            | 0 |
| 0 | 0           | 0 | -0.042200439 | 0 | 0            | 0 | -0.005726221 | 0 |
| 0 | 0.05105694  | 0 | -0.039766663 | 0 | 0            | 0 | -0.00601167  | 0 |
| 0 | 0.050631931 | 0 | -0.042687066 | 0 | 0            | 0 | -0.005535511 | 0 |
| 0 | 0.049961619 | 0 | -0.042324965 | 0 | 0            | 0 | 0            | 0 |
| 0 | 0           | 0 | -0.043042854 | 0 | 0            | 0 | -0.008843668 | 0 |
| 0 | 0.040565723 | 0 | 0            | 0 | 0            | 0 | -0.009499016 | 0 |
| 0 | 0           | 0 | 0            | 0 | 0            | 0 | -0.009503091 | 0 |
| 0 | 0           | 0 | 0            | 0 | 0            | 0 | -0.011505999 | 0 |
| 0 | 0.040175226 | 0 | 0            | 0 | 0            | 0 | 0            | 0 |
| 0 | 0.059349192 | 0 | 0            | 0 | 0            | 0 | 0            | 0 |
| 0 | 0           | 0 | 0            | 0 | 0            | 0 | 0            | 0 |
| 0 | 0           | 0 | 0            | 0 | 0            | 0 | -0.00944137  | 0 |
| 0 | 0.035447452 | 0 | 0            | 0 | 0            | 0 | -0.009483918 | 0 |
| 0 | 0.032892534 | 0 | 0            | 0 | 0            | 0 | -0.009207753 | 0 |
| 0 | 0           | 0 | 0            | 0 | 0            | 0 | 0            | 0 |
| 0 | 0.036530486 | 0 | 0            | 0 | 0            | 0 | 0            | 0 |
| 0 | 0           | 0 | 0            | 0 | 0            | 0 | -0.009236367 | 0 |
| 0 | 0.016591065 | 0 | 0            | 0 | 0            | 0 | 0            | 0 |
| 0 | 0.043792692 | 0 | 0.16862211   | 0 | -0.24853756  | 0 | 0            | 0 |
| 0 | 0.060903848 | 0 | 0            | 0 | 0            | 0 | -0.009435831 | 0 |
| 0 | 0.060541346 | 0 | 0            | 0 | 0            | 0 | 0            | 0 |
| 0 | 0           | 0 | 0            | 0 | 0            | 0 | -0.009379249 | 0 |
| 0 | 0.058803915 | 0 | 0            | 0 | 0            | 0 | -0.009416121 | 0 |
| 0 | 0           | 0 | 0            | 0 | 0            | 0 | -0.009665795 | 0 |
| 0 | 0           | 0 | -0.051970034 | 0 | 0            | 0 | -0.003312228 | 0 |
| 0 | 0.054902228 | 0 | 0            | 0 | 0            | 0 | -0.009751636 | 0 |
| 0 | 0.057602054 | 0 | 0            | 0 | 0            | 0 | 0            | 0 |
| 0 | 0           | 0 | 0            | 0 | 0            | 0 | -0.013039721 | 0 |
| 0 | 0.015535302 | 0 | 0            | 0 | 0            | 0 | -0.009417003 | 0 |
| 0 | 0           | 0 | 0            | 0 | 0            | 0 | -0.00921209  | 0 |
| 0 | 0.049824283 | 0 | 0            | 0 | 0            | 0 | -0.009280323 | 0 |
| 0 | 0.021172948 | 0 | 0            | 0 | 0            | 0 | -0.009276345 | 0 |
| 0 | 0.016010561 | 0 | 0            | 0 | 0            | 0 | 0            | 0 |
| 0 | 0           | 0 | 0            | 0 | 0            | 0 | -0.013022169 | 0 |
| 0 | 0.016828535 | 0 | 0            | 0 | 0            | 0 | -0.009317685 | 0 |
| 0 | 0.040768702 | 0 | -0.049188212 | 0 | 0            | 0 | 0.012979711  | 0 |
| 0 | 0           | 0 | -0.049250792 | 0 | 0            | 0 | 0.012993696  | 0 |
| 0 | 0.043252027 | 0 | -0.049743003 | 0 | 0            | 0 | 0.01261278   | 0 |
| 0 | 0.06022066  | 0 | 0            | 0 | 0            | 0 | -0.009170509 | 0 |
| 0 | 0.017188441 | 0 | 0            | 0 | 0            | 0 | 0            | 0 |
| 0 | 0.063236309 | 0 | 0            | 0 | 0            | 0 | -0.008979125 | 0 |
| 0 | 0.044154245 | 0 | -0.050671051 | 0 | 0            | 0 | 0            | 0 |
| 0 | 0           | 0 | -0.037853416 | 0 | 0            | 0 | -0.02372539  | 0 |
| 0 | 0           | 0 | -0.03501847  | 0 | 0            | 0 | -0.023795668 | 0 |
| 0 | 0.042196312 | 0 | -0.04470506  | 0 | 0            | 0 | 0.011755646  | 0 |
| 0 | 0           | 0 | -0.041667503 | 0 | 0            | 0 | -0.022294146 | 0 |

|   |              |   |              |   |              |   |              |   |
|---|--------------|---|--------------|---|--------------|---|--------------|---|
| 0 | 0.03885068   | 0 | 0            | 0 | -0.077030266 | 0 | 0.026433143  | 0 |
| 0 | 0.033698579  | 0 | 0            | 0 | 0            | 0 | -0.007001051 | 0 |
| 0 | 0            | 0 | 0            | 0 | 0            | 0 | -0.007030939 | 0 |
| 0 | 0.062545562  | 0 | 0            | 0 | 0            | 0 | 0            | 0 |
| 0 | 0.063377354  | 0 | 0            | 0 | 0            | 0 | -0.006705448 | 0 |
| 0 | 0.044060003  | 0 | -0.062750989 | 0 | 0            | 0 | 0.010060857  | 0 |
| 0 | 0.069699818  | 0 | -0.062732291 | 0 | 0            | 0 | 0.010040686  | 0 |
| 0 | 0            | 0 | -0.062751145 | 0 | 0            | 0 | 0.010076522  | 0 |
| 0 | -0.012219672 | 0 | 0            | 0 | 0            | 0 | 0            | 0 |
| 0 | 0            | 0 | 0            | 0 | 0            | 0 | 0.000436298  | 0 |
| 0 | -0.012775808 | 0 | 0            | 0 | 0            | 0 | 0.000705722  | 0 |
| 0 | 0.046057711  | 0 | -0.064958655 | 0 | 0            | 0 | 0.011665726  | 0 |
| 0 | -0.012244702 | 0 | 0            | 0 | 0            | 0 | 0.000443143  | 0 |
| 0 | -0.015131186 | 0 | 0            | 0 | 0            | 0 | 0.001309227  | 0 |
| 0 | 0.063449121  | 0 | 0            | 0 | 0            | 0 | 0.000489305  | 0 |
| 0 | 0            | 0 | -0.038369666 | 0 | 0            | 0 | -0.021204816 | 0 |
| 0 | 0.055204994  | 0 | 0            | 0 | 0            | 0 | 0.002075488  | 0 |
| 0 | 0.072166118  | 0 | 0            | 0 | 0            | 0 | 0.002046103  | 0 |
| 0 | 0.062063313  | 0 | 0            | 0 | 0            | 0 | -0.007054035 | 0 |
| 0 | 0.058289038  | 0 | 0            | 0 | 0            | 0 | 0            | 0 |
| 0 | 0            | 0 | 0            | 0 | 0            | 0 | 0.002100671  | 0 |
| 0 | 0            | 0 | -0.03968894  | 0 | 0            | 0 | 0            | 0 |
| 0 | 0            | 0 | -0.042532703 | 0 | 0            | 0 | -0.021677679 | 0 |
| 0 | 0.047186436  | 0 | -0.06465621  | 0 | 0            | 0 | 0            | 0 |
| 0 | 0.06433612   | 0 | 0            | 0 | 0            | 0 | -0.006500812 | 0 |
| 0 | 0.031722633  | 0 | 0.17978979   | 0 | -0.25574132  | 0 | 0.056100729  | 0 |
| 0 | 0            | 0 | 0            | 0 | 0            | 0 | -0.025913637 | 0 |
| 0 | 0.05968342   | 0 | 0            | 0 | 0            | 0 | 0.007170727  | 0 |
| 0 | 0.05441033   | 0 | 0            | 0 | 0            | 0 | 0.016954287  | 0 |
| 0 | 0.042205465  | 0 | -0.062094145 | 0 | 0            | 0 | 0.027446748  | 0 |
| 0 | 0.061257268  | 0 | 0            | 0 | 0            | 0 | 0.020398727  | 0 |
| 0 | 0            | 0 | 0.20926163   | 0 | -0.2590203   | 0 | 0            | 0 |
| 0 | 0.026938172  | 0 | 0.20600161   | 0 | -0.25562087  | 0 | 0            | 0 |
| 0 | 0            | 0 | 0.20598244   | 0 | -0.25557992  | 0 | 0            | 0 |
| 0 | 0            | 0 | 0.20411384   | 0 | -0.25116465  | 0 | 0            | 0 |
| 0 | 0.024455037  | 0 | 0.20410348   | 0 | -0.25122583  | 0 | 0            | 0 |
| 0 | 0            | 0 | 0.20697535   | 0 | -0.26234009  | 0 | 0            | 0 |
| 0 | 0            | 0 | 0.20316547   | 0 | -0.25586249  | 0 | 0            | 0 |
| 0 | 0.033703874  | 0 | 0.20314489   | 0 | -0.25592659  | 0 | 0            | 0 |
| 0 | 0            | 0 | 0.20391462   | 0 | -0.25170572  | 0 | 0            | 0 |
| 0 | 0.062213824  | 0 | 0.20386036   | 0 | -0.2517585   | 0 | 0            | 0 |
| 0 | 0            | 0 | 0.20237504   | 0 | -0.25204164  | 0 | -0.002962596 | 0 |
| 0 | 0            | 0 | 0.20597064   | 0 | -0.25965704  | 0 | -0.01052972  | 0 |
| 0 | 0.02759845   | 0 | 0.20236344   | 0 | -0.25210292  | 0 | -0.002954262 | 0 |
| 0 | -0.000762042 | 0 | 0.20291811   | 0 | -0.2527085   | 0 | 0            | 0 |
| 0 | 0            | 0 | 0.20814204   | 0 | -0.25886017  | 0 | 0            | 0 |
| 0 | 0            | 0 | 0.20427925   | 0 | -0.25490808  | 0 | -0.004938016 | 0 |

|   |              |   |            |   |             |   |              |   |
|---|--------------|---|------------|---|-------------|---|--------------|---|
| 0 | 0            | 0 | 0.2006992  | 0 | -0.25028752 | 0 | -0.006797537 | 0 |
| 0 | 0.055607944  | 0 | 0.20064768 | 0 | -0.25033484 | 0 | -0.006805941 | 0 |
| 0 | 0.020961816  | 0 | 0.20476833 | 0 | -0.25515788 | 0 | 0            | 0 |
| 0 | 0            | 0 | 0.20476663 | 0 | -0.2552526  | 0 | 0            | 0 |
| 0 | 0.012181792  | 0 | 0.20183783 | 0 | -0.25116163 | 0 | 0            | 0 |
| 0 | 0            | 0 | 0.20198605 | 0 | -0.25108252 | 0 | 0            | 0 |
| 0 | 0            | 0 | 0.2028887  | 0 | -0.25938153 | 0 | -0.006443105 | 0 |
| 0 | 0.057657876  | 0 | 0.202002   | 0 | -0.2510937  | 0 | 0            | 0 |
| 0 | 0.044559524  | 0 | 0.19773493 | 0 | -0.26002148 | 0 | 0            | 0 |
| 0 | 0            | 0 | 0.19769329 | 0 | -0.26004754 | 0 | 0            | 0 |
| 0 | 0            | 0 | 0.20501784 | 0 | -0.2578911  | 0 | -0.008033843 | 0 |
| 0 | 0            | 0 | 0.20578062 | 0 | -0.26199599 | 0 | 0            | 0 |
| 0 | 0.023672616  | 0 | 0.20253245 | 0 | -0.25551977 | 0 | -0.005420016 | 0 |
| 0 | 0            | 0 | 0.20251649 | 0 | -0.25561466 | 0 | -0.005445041 | 0 |
| 0 | 0.026965589  | 0 | 0.20285887 | 0 | -0.25682576 | 0 | 0            | 0 |
| 0 | 0.049184057  | 0 | 0.20321932 | 0 | -0.25641432 | 0 | 0            | 0 |
| 0 | 0.025140382  | 0 | 0.20898685 | 0 | -0.25916873 | 0 | -0.005639436 | 0 |
| 0 | 0            | 0 | 0.20897123 | 0 | -0.25913677 | 0 | -0.005616521 | 0 |
| 0 | 0            | 0 | 0.20285293 | 0 | -0.25688361 | 0 | 0            | 0 |
| 0 | 0            | 0 | 0.20898755 | 0 | -0.26059781 | 0 | 0            | 0 |
| 0 | 0.029190514  | 0 | 0.20902698 | 0 | -0.2606342  | 0 | 0            | 0 |
| 0 | 0.027583162  | 0 | 0.20901821 | 0 | -0.25988807 | 0 | 0            | 0 |
| 0 | 0            | 0 | 0.20899761 | 0 | -0.25984491 | 0 | 0            | 0 |
| 0 | 0.015864537  | 0 | 0.20957455 | 0 | -0.25997818 | 0 | 0            | 0 |
| 0 | 0            | 0 | 0.20240791 | 0 | -0.24228304 | 0 | -0.008223931 | 0 |
| 0 | 0.054303786  | 0 | 0.20241756 | 0 | -0.24226977 | 0 | -0.008316283 | 0 |
| 0 | 0            | 0 | 0.2033816  | 0 | -0.24301125 | 0 | 0            | 0 |
| 0 | 0.010991624  | 0 | 0.20326901 | 0 | -0.24345581 | 0 | 0            | 0 |
| 0 | 0.062447427  | 0 | 0.19937938 | 0 | -0.25395787 | 0 | 0            | 0 |
| 0 | 0.057330196  | 0 | 0.20339491 | 0 | -0.24304584 | 0 | 0            | 0 |
| 0 | 0            | 0 | 0.19929683 | 0 | -0.25398633 | 0 | 0            | 0 |
| 0 | 0.063085263  | 0 | 0.19663796 | 0 | -0.25508458 | 0 | -0.002896046 | 0 |
| 0 | 0            | 0 | 0.20396172 | 0 | -0.25836513 | 0 | -0.007832981 | 0 |
| 0 | 0.04445081   | 0 | 0.19727653 | 0 | -0.25532616 | 0 | 0            | 0 |
| 0 | 0            | 0 | 0.19659023 | 0 | -0.25510931 | 0 | -0.00283193  | 0 |
| 0 | 0            | 0 | 0.21051206 | 0 | -0.26259313 | 0 | -0.008196368 | 0 |
| 0 | 0            | 0 | 0.19988329 | 0 | -0.24027683 | 0 | -0.003831896 | 0 |
| 0 | -0.004145978 | 0 | 0.19987506 | 0 | -0.24035331 | 0 | -0.003837865 | 0 |
| 0 | 0            | 0 | 0.20979385 | 0 | -0.26454607 | 0 | -0.008525131 | 0 |
| 0 | -0.002900919 | 0 | 0.20057219 | 0 | -0.24108123 | 0 | 0            | 0 |
| 0 | 0.056618273  | 0 | 0.19980694 | 0 | -0.24026174 | 0 | -0.003828666 | 0 |
| 0 | 0            | 0 | 0.21102307 | 0 | -0.263259   | 0 | 0            | 0 |
| 0 | 0            | 0 | 0.20427755 | 0 | -0.26232494 | 0 | 0            | 0 |
| 0 | -0.001464412 | 0 | 0.20417088 | 0 | -0.26216555 | 0 | 0            | 0 |
| 0 | 0            | 0 | 0.20419763 | 0 | -0.26218573 | 0 | 0.000163749  | 0 |
| 0 | 0            | 0 | 0.20470978 | 0 | -0.25525161 | 0 | -0.00556832  | 0 |
| 0 | 0.042859546  | 0 | 0.20425789 | 0 | -0.26245412 | 0 | 0            | 0 |

|   |              |   |            |   |             |   |              |   |
|---|--------------|---|------------|---|-------------|---|--------------|---|
| 0 | 0.042743174  | 0 | 0.20418587 | 0 | -0.26232454 | 0 | 0.000193306  | 0 |
| 0 | 0.055230495  | 0 | 0.20471797 | 0 | -0.25524995 | 0 | -0.005657519 | 0 |
| 0 | 0.012937295  | 0 | 0.20520929 | 0 | -0.25606248 | 0 | 0            | 0 |
| 0 | 0            | 0 | 0.20512697 | 0 | -0.25590936 | 0 | 0            | 0 |
| 0 | 0.054952862  | 0 | 0.19845098 | 0 | -0.25140854 | 0 | -0.005371401 | 0 |
| 0 | 0.056928935  | 0 | 0.20513383 | 0 | -0.25589983 | 0 | 0            | 0 |
| 0 | 0            | 0 | 0.19838609 | 0 | -0.25144273 | 0 | -0.005306743 | 0 |
| 0 | 0.047066275  | 0 | 0.19904271 | 0 | -0.25226393 | 0 | 0            | 0 |
| 0 | 0            | 0 | 0.20299478 | 0 | -0.25837633 | 0 | -0.001655619 | 0 |
| 0 | 0.002485214  | 0 | 0.20293253 | 0 | -0.25829231 | 0 | -0.001651582 | 0 |
| 0 | 0.002979446  | 0 | 0.20325347 | 0 | -0.25848863 | 0 | 0            | 0 |
| 0 | 0.057423817  | 0 | 0.20293978 | 0 | -0.25845111 | 0 | -0.001654289 | 0 |
| 0 | 0            | 0 | 0.20453655 | 0 | -0.24878171 | 0 | -0.006282228 | 0 |
| 0 | 0.052542558  | 0 | 0.20453496 | 0 | -0.24878019 | 0 | -0.006367997 | 0 |
| 0 | 0.012908005  | 0 | 0.20512673 | 0 | -0.24957703 | 0 | 0            | 0 |
| 0 | 0.025435054  | 0 | 0.20553023 | 0 | -0.2602507  | 0 | -0.003364784 | 0 |
| 0 | 0            | 0 | 0.19686859 | 0 | -0.26666055 | 0 | -0.001652964 | 0 |
| 0 | 0.027855335  | 0 | 0.20562707 | 0 | -0.26143463 | 0 | -0.003169647 | 0 |
| 0 | 0.028247722  | 0 | 0.20571281 | 0 | -0.26137719 | 0 | 0            | 0 |
| 0 | 0.050354205  | 0 | 0.20595694 | 0 | -0.26078748 | 0 | 0            | 0 |
| 0 | 0.05009521   | 0 | 0.20601428 | 0 | -0.26192302 | 0 | 0            | 0 |
| 0 | 0            | 0 | 0.20552055 | 0 | -0.26034614 | 0 | -0.003384957 | 0 |
| 0 | 0.046463099  | 0 | 0.19335314 | 0 | -0.25858622 | 0 | 0.003417083  | 0 |
| 0 | 0            | 0 | 0.20562402 | 0 | -0.26149481 | 0 | -0.003186254 | 0 |
| 0 | 0.050835202  | 0 | 0.20641487 | 0 | -0.2604689  | 0 | -0.003331267 | 0 |
| 0 | 0            | 0 | 0.20570715 | 0 | -0.26143284 | 0 | 0            | 0 |
| 0 | 0            | 0 | 0.19330711 | 0 | -0.25860403 | 0 | 0.003446333  | 0 |
| 0 | 0.04632915   | 0 | 0.19245674 | 0 | -0.25810581 | 0 | 0            | 0 |
| 0 | 0.011248867  | 0 | 0.20619695 | 0 | -0.24712877 | 0 | -0.006201305 | 0 |
| 0 | 0.047669865  | 0 | 0.19962914 | 0 | -0.24309919 | 0 | -0.005978265 | 0 |
| 0 | 0.054035292  | 0 | 0.19963308 | 0 | -0.24310868 | 0 | -0.005994697 | 0 |
| 0 | 0            | 0 | 0.20316793 | 0 | -0.25683132 | 0 | 0.003819306  | 0 |
| 0 | 0            | 0 | 0.19957076 | 0 | -0.24313453 | 0 | -0.005933166 | 0 |
| 0 | 0.034621502  | 0 | 0.20315541 | 0 | -0.25696253 | 0 | 0.003838796  | 0 |
| 0 | -0.015655228 | 0 | 0.20244835 | 0 | -0.25610586 | 0 | 0            | 0 |
| 0 | 0.045627807  | 0 | 0.1931013  | 0 | -0.25556831 | 0 | 0.001641293  | 0 |
| 0 | 0.046685424  | 0 | 0.20029829 | 0 | -0.24401728 | 0 | 0            | 0 |
| 0 | 0            | 0 | 0.20704546 | 0 | -0.26311178 | 0 | -0.005911361 | 0 |
| 0 | -0.023566586 | 0 | 0.20500647 | 0 | -0.25675105 | 0 | 0.006470284  | 0 |
| 0 | 0.054562128  | 0 | 0.20173525 | 0 | -0.25650002 | 0 | -0.003380122 | 0 |
| 0 | 0.04871474   | 0 | 0.20195077 | 0 | -0.2569608  | 0 | -0.003271273 | 0 |
| 0 | 0.048253241  | 0 | 0.20208313 | 0 | -0.25701059 | 0 | 0            | 0 |
| 0 | 0            | 0 | 0.20167459 | 0 | -0.25654166 | 0 | -0.003316287 | 0 |
| 0 | -0.011731282 | 0 | 0.20075139 | 0 | -0.24886768 | 0 | 0.002005746  | 0 |
| 0 | 0            | 0 | 0.20502329 | 0 | -0.26876705 | 0 | -0.001225971 | 0 |
| 0 | 0.049170675  | 0 | 0.20162552 | 0 | -0.24997214 | 0 | -0.004043394 | 0 |
| 0 | 0            | 0 | 0          | 0 | -0.05725449 | 0 | 0            | 0 |

|   |              |   |            |   |              |   |              |   |
|---|--------------|---|------------|---|--------------|---|--------------|---|
| 0 | 0.034846071  | 0 | 0          | 0 | -0.057329879 | 0 | 0            | 0 |
| 0 | 0.033265422  | 0 | 0.18758941 | 0 | -0.24811257  | 0 | 0.01645317   | 0 |
| 0 | 0.041506072  | 0 | 0.18756093 | 0 | -0.24832231  | 0 | 0.016300449  | 0 |
| 0 | 0            | 0 | 0.18756178 | 0 | -0.24815338  | 0 | 0.016459333  | 0 |
| 0 | 0.044694159  | 0 | 0.19414555 | 0 | -0.2683939   | 0 | 0.01116506   | 0 |
| 0 | 0.061581305  | 0 | 0.19415841 | 0 | -0.26847081  | 0 | 0.011181723  | 0 |
| 0 | 0.044761909  | 0 | 0.19392936 | 0 | -0.26812615  | 0 | 0.011190858  | 0 |
| 0 | 0            | 0 | 0.19410584 | 0 | -0.26844951  | 0 | 0.011214444  | 0 |
| 0 | 0            | 0 | 0          | 0 | -0.052496689 | 0 | 0            | 0 |
| 0 | 0.024181518  | 0 | 0          | 0 | -0.05251918  | 0 | 0            | 0 |
| 0 | 0            | 0 | 0.2000197  | 0 | -0.25031813  | 0 | -0.021080047 | 0 |
| 0 | 0            | 0 | 0          | 0 | -0.055010772 | 0 | -0.012050509 | 0 |
| 0 | 0            | 0 | 0.19888425 | 0 | -0.25211928  | 0 | -0.020333342 | 0 |
| 0 | 0.025700603  | 0 | 0          | 0 | -0.054900237 | 0 | -0.009105651 | 0 |
| 0 | 0            | 0 | 0          | 0 | -0.054879977 | 0 | -0.009080099 | 0 |
| 0 | 0            | 0 | 0          | 0 | -0.061085989 | 0 | -0.011039194 | 0 |
| 0 | 0            | 0 | 0          | 0 | -0.05276195  | 0 | -0.005012493 | 0 |
| 0 | 0.024724857  | 0 | 0          | 0 | -0.052830773 | 0 | -0.005007327 | 0 |
| 0 | 0.046097974  | 0 | 0.19109875 | 0 | -0.26753204  | 0 | 0            | 0 |
| 0 | 0            | 0 | 0          | 0 | -0.053898844 | 0 | -0.011126148 | 0 |
| 0 | 0            | 0 | 0          | 0 | -0.058315411 | 0 | -0.006926299 | 0 |
| 0 | 0.058594674  | 0 | 0          | 0 | -0.053997896 | 0 | -0.011129211 | 0 |
| 0 | 0.033602425  | 0 | 0          | 0 | -0.058397679 | 0 | -0.006915118 | 0 |
| 0 | -0.001770783 | 0 | 0          | 0 | -0.052985486 | 0 | 0            | 0 |
| 0 | 0            | 0 | 0          | 0 | -0.05652408  | 0 | 0            | 0 |
| 0 | 0.030796019  | 0 | 0          | 0 | -0.056524894 | 0 | 0            | 0 |
| 0 | 0            | 0 | 0          | 0 | -0.057107736 | 0 | 0            | 0 |
| 0 | 0.013640272  | 0 | 0          | 0 | -0.055323453 | 0 | 0            | 0 |
| 0 | 0.063609004  | 0 | 0          | 0 | -0.057096725 | 0 | 0            | 0 |
| 0 | 0            | 0 | 0          | 0 | -0.058950757 | 0 | 0            | 0 |
| 0 | 0.008958514  | 0 | 0          | 0 | -0.058223788 | 0 | 0            | 0 |
| 0 | 0.0429794    | 0 | 0.18109912 | 0 | -0.24327894  | 0 | 0            | 0 |
| 0 | 0            | 0 | 0.20072208 | 0 | -0.24525489  | 0 | -0.021023057 | 0 |
| 0 | -3.83E-05    | 0 | 0          | 0 | -0.055174759 | 0 | -0.005113699 | 0 |
| 0 | 0.017725616  | 0 | 0          | 0 | -0.053648455 | 0 | 0            | 0 |
| 0 | 0            | 0 | 0          | 0 | -0.056719145 | 0 | -0.011765263 | 0 |
| 0 | 0.03556463   | 0 | 0          | 0 | -0.06172715  | 0 | 0            | 0 |
| 0 | 0            | 0 | 0          | 0 | -0.061794867 | 0 | 0            | 0 |
| 0 | 0.012132066  | 0 | 0          | 0 | -0.055290515 | 0 | -0.008802387 | 0 |
| 0 | 0            | 0 | 0          | 0 | -0.055197467 | 0 | -0.008878282 | 0 |
| 0 | 0.040512073  | 0 | 0.18513286 | 0 | -0.23947405  | 0 | 0.014744215  | 0 |
| 0 | 0.043944737  | 0 | 0          | 0 | -0.06674431  | 0 | -0.003283931 | 0 |
| 0 | 0.054727137  | 0 | 0          | 0 | -0.055186235 | 0 | -0.008968866 | 0 |
| 0 | 0            | 0 | 0          | 0 | -0.066801846 | 0 | -0.003256544 | 0 |
| 0 | 0.042546232  | 0 | 0          | 0 | -0.066426782 | 0 | 0            | 0 |
| 0 | 0.020792527  | 0 | 0          | 0 | -0.055898235 | 0 | -0.007313729 | 0 |
| 0 | 0            | 0 | 0          | 0 | -0.055989956 | 0 | -0.00734208  | 0 |



|   |              |   |              |   |              |   |              |   |
|---|--------------|---|--------------|---|--------------|---|--------------|---|
| 0 | 0.012930637  | 0 | 0            | 0 | -0.055780013 | 0 | 0            | 0 |
| 0 | 0            | 0 | 0.20243783   | 0 | -0.25349991  | 0 | -0.018889851 | 0 |
| 0 | 0            | 0 | 0.2022547    | 0 | -0.25454344  | 0 | 0            | 0 |
| 0 | 0.04539107   | 0 | 0            | 0 | -0.056235695 | 0 | 0            | 0 |
| 0 | 0            | 0 | 0            | 0 | -0.062124217 | 0 | -0.010275414 | 0 |
| 0 | 0.028136556  | 0 | 0            | 0 | -0.059967491 | 0 | -0.006825122 | 0 |
| 0 | 0            | 0 | 0.19733322   | 0 | -0.25235182  | 0 | -0.019236646 | 0 |
| 0 | 0            | 0 | 0            | 0 | -0.0600275   | 0 | -0.006835384 | 0 |
| 0 | 0.047192728  | 0 | 0            | 0 | -0.058374982 | 0 | -0.007003001 | 0 |
| 0 | 0.060134602  | 0 | 0            | 0 | -0.060546078 | 0 | -0.007094141 | 0 |
| 0 | 0            | 0 | 0            | 0 | -0.060655306 | 0 | -0.007006661 | 0 |
| 0 | 0.04587894   | 0 | 0            | 0 | -0.060291807 | 0 | 0            | 0 |
| 0 | 0.042657403  | 0 | 0            | 0 | -0.063009287 | 0 | -0.005375263 | 0 |
| 0 | 0.042256079  | 0 | 0            | 0 | -0.060925232 | 0 | 0            | 0 |
| 0 | 0            | 0 | 0            | 0 | -0.045561833 | 0 | -0.00963156  | 0 |
| 0 | 0.010559854  | 0 | 0            | 0 | -0.045922222 | 0 | -0.009588612 | 0 |
| 0 | 0.054024889  | 0 | 0            | 0 | -0.045574247 | 0 | -0.009716422 | 0 |
| 0 | 0.01005742   | 0 | 0            | 0 | -0.04611604  | 0 | 0            | 0 |
| 0 | 0            | 0 | 0            | 0 | -0.056833928 | 0 | -0.006970158 | 0 |
| 0 | 0.02773613   | 0 | 0            | 0 | -0.056857348 | 0 | -0.006998712 | 0 |
| 0 | 0            | 0 | 0            | 0 | -0.058162488 | 0 | -0.006736097 | 0 |
| 0 | 0.03064743   | 0 | 0            | 0 | -0.058162168 | 0 | -0.006773243 | 0 |
| 0 | 0.012007941  | 0 | 0            | 0 | -0.05599981  | 0 | -0.006889638 | 0 |
| 0 | -0.002196221 | 0 | 0            | 0 | -0.046500688 | 0 | -0.005916302 | 0 |
| 0 | 0            | 0 | 0            | 0 | -0.058281535 | 0 | 0            | 0 |
| 0 | 0.032144603  | 0 | 0            | 0 | -0.05827798  | 0 | 0            | 0 |
| 0 | 0.013758528  | 0 | 0            | 0 | -0.058558971 | 0 | 0            | 0 |
| 0 | 0.013696637  | 0 | 0            | 0 | -0.057140824 | 0 | 0            | 0 |
| 0 | 0.045251759  | 0 | 0            | 0 | -0.059202318 | 0 | -0.006776597 | 0 |
| 0 | 0            | 0 | 0            | 0 | -0.058485294 | 0 | -0.009795849 | 0 |
| 0 | 0            | 0 | 0            | 0 | -0.063656715 | 0 | -0.001883561 | 0 |
| 0 | 0.000166548  | 0 | 0            | 0 | -0.063716275 | 0 | -0.001881093 | 0 |
| 0 | 0.043711411  | 0 | 0            | 0 | -0.069326525 | 0 | 0.000546599  | 0 |
| 0 | 0.000639817  | 0 | 0            | 0 | -0.063568393 | 0 | 0            | 0 |
| 0 | 0.043490095  | 0 | 0            | 0 | -0.063804252 | 0 | -0.001852984 | 0 |
| 0 | 0            | 0 | 0            | 0 | -0.057135844 | 0 | -0.006838268 | 0 |
| 0 | 0.012476855  | 0 | 0            | 0 | -0.057397181 | 0 | -0.006744149 | 0 |
| 0 | 0.054231708  | 0 | 0            | 0 | -0.057114384 | 0 | -0.006930631 | 0 |
| 0 | 0.012489835  | 0 | 0            | 0 | -0.05756644  | 0 | 0            | 0 |
| 0 | 0.003631867  | 0 | 0            | 0 | -0.061289194 | 0 | -0.003472945 | 0 |
| 0 | 0.012675489  | 0 | 0            | 0 | -0.050963752 | 0 | -0.007513402 | 0 |
| 0 | 0            | 0 | -0.038981811 | 0 | 0            | 0 | 0            | 0 |
| 0 | 0.040145915  | 0 | -0.039074886 | 0 | 0            | 0 | 0            | 0 |
| 0 | 0.045003368  | 0 | 0            | 0 | -0.049535704 | 0 | -0.007414476 | 0 |
| 0 | 0            | 0 | -0.035194865 | 0 | 0            | 0 | 0            | 0 |
| 0 | 0.031246981  | 0 | -0.035229108 | 0 | 0            | 0 | 0            | 0 |
| 0 | 0.029954989  | 0 | 0            | 0 | -0.061859465 | 0 | -0.004671721 | 0 |

|   |              |   |              |   |              |   |              |   |
|---|--------------|---|--------------|---|--------------|---|--------------|---|
| 0 | 0.048115456  | 0 | 0            | 0 | -0.060629319 | 0 | -0.004859439 | 0 |
| 0 | 0            | 0 | 0            | 0 | -0.061921373 | 0 | -0.004677915 | 0 |
| 0 | 0.047649899  | 0 | 0            | 0 | -0.062293337 | 0 | -0.004549717 | 0 |
| 0 | 0.047118877  | 0 | 0            | 0 | -0.062068397 | 0 | 0            | 0 |
| 0 | -0.011932512 | 0 | 0            | 0 | -0.059441619 | 0 | 0.001593833  | 0 |
| 0 | 0            | 0 | -0.035704103 | 0 | 0            | 0 | -0.006033089 | 0 |
| 0 | 0.031437328  | 0 | -0.035786216 | 0 | 0            | 0 | -0.006026139 | 0 |
| 0 | 0            | 0 | -0.036516084 | 0 | 0            | 0 | -0.011105951 | 0 |
| 0 | -0.001273889 | 0 | -0.035881354 | 0 | 0            | 0 | 0            | 0 |
| 0 | 0            | 0 | -0.038340377 | 0 | 0            | 0 | -0.010142644 | 0 |
| 0 | 0.033549401  | 0 | -0.038372198 | 0 | 0            | 0 | -0.010181417 | 0 |
| 0 | 0.060227088  | 0 | -0.036623057 | 0 | 0            | 0 | -0.011114711 | 0 |
| 0 | 0            | 0 | -0.038466057 | 0 | 0            | 0 | -0.01405335  | 0 |
| 0 | 0            | 0 | -0.037151753 | 0 | 0            | 0 | 0            | 0 |
| 0 | 0.033338421  | 0 | -0.037149239 | 0 | 0            | 0 | 0            | 0 |
| 0 | 0            | 0 | -0.037901014 | 0 | 0            | 0 | 0            | 0 |
| 0 | 0.01470986   | 0 | -0.038740054 | 0 | 0            | 0 | 0            | 0 |
| 0 | 0.064241196  | 0 | -0.037884625 | 0 | 0            | 0 | 0            | 0 |
| 0 | 0.014537845  | 0 | -0.0361512   | 0 | 0            | 0 | 0            | 0 |
| 0 | 0            | 0 | -0.040313252 | 0 | 0            | 0 | -0.007145297 | 0 |
| 0 | 0.038813207  | 0 | -0.040411312 | 0 | 0            | 0 | -0.007135969 | 0 |
| 0 | 0.04622013   | 0 | 0            | 0 | -0.061118545 | 0 | -0.004714054 | 0 |
| 0 | 0.001133469  | 0 | -0.038779426 | 0 | 0            | 0 | -0.006197996 | 0 |
| 0 | 0.006421052  | 0 | -0.040126271 | 0 | 0            | 0 | 0            | 0 |
| 0 | 0            | 0 | -0.043270388 | 0 | 0            | 0 | -0.011615247 | 0 |
| 0 | 0            | 0 | -0.039158712 | 0 | 0            | 0 | 0            | 0 |
| 0 | 0            | 0 | -0.037227776 | 0 | 0            | 0 | -0.013288618 | 0 |
| 0 | 0            | 0 | -0.03619555  | 0 | 0            | 0 | -0.010161567 | 0 |
| 0 | 0.055303903  | 0 | -0.036179037 | 0 | 0            | 0 | -0.010251307 | 0 |
| 0 | 0            | 0 | -0.02966981  | 0 | 0            | 0 | -0.010721058 | 0 |
| 0 | 0.008784199  | 0 | -0.038048099 | 0 | 0            | 0 | -0.008661911 | 0 |
| 0 | 0.056006914  | 0 | -0.029683569 | 0 | 0            | 0 | -0.010811663 | 0 |
| 0 | 0.012445794  | 0 | -0.031914192 | 0 | 0            | 0 | -0.01045902  | 0 |
| 0 | 0.012965119  | 0 | -0.036747932 | 0 | 0            | 0 | 0            | 0 |
| 0 | 0.037806683  | 0 | -0.042608703 | 0 | 0            | 0 | 0            | 0 |
| 0 | 0.010875551  | 0 | -0.030187599 | 0 | 0            | 0 | 0            | 0 |
| 0 | 0.027464831  | 0 | -0.039056487 | 0 | 0            | 0 | -0.008298217 | 0 |
| 0 | 0            | 0 | -0.04267763  | 0 | 0            | 0 | 0            | 0 |
| 0 | 0            | 0 | -0.039149859 | 0 | 0            | 0 | -0.00831645  | 0 |
| 0 | -0.002282249 | 0 | -0.030801937 | 0 | 0            | 0 | -0.006732989 | 0 |
| 0 | 0.049268205  | 0 | -0.039349002 | 0 | 0            | 0 | 0            | 0 |
| 0 | 0.03033751   | 0 | -0.041081363 | 0 | 0            | 0 | -0.007921845 | 0 |
| 0 | 0.051346991  | 0 | -0.042180279 | 0 | 0            | 0 | -0.007903233 | 0 |
| 0 | 0.039534749  | 0 | 0            | 0 | -0.064827944 | 0 | 0.012857077  | 0 |
| 0 | 0            | 0 | -0.04114405  | 0 | 0            | 0 | -0.007935162 | 0 |
| 0 | 0.060293685  | 0 | -0.041813084 | 0 | 0            | 0 | -0.008170518 | 0 |
| 0 | 0            | 0 | -0.041923082 | 0 | 0            | 0 | -0.008092095 | 0 |

|   |              |   |              |   |              |   |              |   |
|---|--------------|---|--------------|---|--------------|---|--------------|---|
| 0 | 0.051205871  | 0 | -0.050349349 | 0 | 0            | 0 | -0.002555038 | 0 |
| 0 | 0.050134787  | 0 | -0.04136596  | 0 | 0            | 0 | 0            | 0 |
| 0 | 0.040658616  | 0 | 0.18324604   | 0 | -0.25635569  | 0 | 0.030245233  | 0 |
| 0 | 0.046577466  | 0 | -0.050069663 | 0 | 0            | 0 | 0            | 0 |
| 0 | 0            | 0 | -0.042866682 | 0 | 0            | 0 | -0.011557391 | 0 |
| 0 | 0            | 0 | -0.05040743  | 0 | 0            | 0 | -0.002522517 | 0 |
| 0 | 0.046199011  | 0 | -0.042147737 | 0 | 0            | 0 | 0            | 0 |
| 0 | 0            | 0 | -0.039684521 | 0 | 0            | 0 | -0.007940965 | 0 |
| 0 | 0.035209506  | 0 | -0.039718092 | 0 | 0            | 0 | -0.007983656 | 0 |
| 0 | 0            | 0 | 0            | 0 | 0            | 0 | -0.012251058 | 0 |
| 0 | 0.039186333  | 0 | 0            | 0 | 0            | 0 | -0.012305641 | 0 |
| 0 | 0            | 0 | -0.038533477 | 0 | 0            | 0 | -0.007929018 | 0 |
| 0 | 0.032976299  | 0 | -0.038529413 | 0 | 0            | 0 | -0.007969515 | 0 |
| 0 | 0.01493559   | 0 | -0.039144904 | 0 | 0            | 0 | -0.00789288  | 0 |
| 0 | 0.046106764  | 0 | -0.047802216 | 0 | 0            | 0 | -0.004054075 | 0 |
| 0 | 0            | 0 | -0.038495775 | 0 | 0            | 0 | 0            | 0 |
| 0 | 0.034336502  | 0 | -0.038489019 | 0 | 0            | 0 | 0            | 0 |
| 0 | 0.015018399  | 0 | -0.039960518 | 0 | 0            | 0 | 0            | 0 |
| 0 | 0.015449864  | 0 | -0.038923722 | 0 | 0            | 0 | 0            | 0 |
| 0 | 0            | 0 | 0            | 0 | 0            | 0 | 0            | 0 |
| 0 | 0.042568691  | 0 | 0            | 0 | -0.078350093 | 0 | 0.008353572  | 0 |
| 0 | 0.040605402  | 0 | 0            | 0 | 0            | 0 | 0            | 0 |
| 0 | 0.049712728  | 0 | -0.040644072 | 0 | 0            | 0 | -0.007870809 | 0 |
| 0 | 0.01248343   | 0 | 0            | 0 | 0            | 0 | 0            | 0 |
| 0 | 0            | 0 | 0            | 0 | 0            | 0 | -0.008950479 | 0 |
| 0 | 0.048610596  | 0 | 0            | 0 | 0            | 0 | -0.008945539 | 0 |
| 0 | 0.049146012  | 0 | -0.034061651 | 0 | 0            | 0 | -0.008325858 | 0 |
| 0 | 0            | 0 | -0.03768256  | 0 | 0            | 0 | -0.008089237 | 0 |
| 0 | 0.054335574  | 0 | -0.037662258 | 0 | 0            | 0 | -0.008179249 | 0 |
| 0 | 0.013953558  | 0 | -0.035576203 | 0 | 0            | 0 | -0.008311524 | 0 |
| 0 | 0.013452001  | 0 | -0.038101704 | 0 | 0            | 0 | -0.007920857 | 0 |
| 0 | 0.031976994  | 0 | 0            | 0 | 0            | 0 | -0.011910565 | 0 |
| 0 | 0            | 0 | 0            | 0 | 0            | 0 | -0.01187589  | 0 |
| 0 | 0            | 0 | -0.038547735 | 0 | 0            | 0 | -0.011249618 | 0 |
| 0 | 0.003952153  | 0 | 0            | 0 | 0            | 0 | 0            | 0 |
| 0 | -0.004173006 | 0 | 0            | 0 | 0            | 0 | -0.006887316 | 0 |
| 0 | 0            | 0 | 0            | 0 | 0            | 0 | -0.012098421 | 0 |
| 0 | 0.01366729   | 0 | -0.038105545 | 0 | 0            | 0 | 0            | 0 |
| 0 | 0.061415366  | 0 | 0            | 0 | 0            | 0 | -0.012200369 | 0 |
| 0 | 0.012665228  | 0 | 0            | 0 | 0            | 0 | -0.012057477 | 0 |
| 0 | 0            | 0 | 0            | 0 | -0.057263367 | 0 | -0.022828276 | 0 |
| 0 | 0.005715008  | 0 | 0            | 0 | 0            | 0 | -0.010082225 | 0 |
| 0 | 0            | 0 | 0            | 0 | 0            | 0 | -0.015805196 | 0 |
| 0 | 0.015534377  | 0 | 0            | 0 | 0            | 0 | 0            | 0 |
| 0 | 0.0124546    | 0 | 0            | 0 | 0            | 0 | 0            | 0 |
| 0 | 0            | 0 | -0.045692901 | 0 | 0            | 0 | -0.001640747 | 0 |
| 0 | -0.002772214 | 0 | -0.04559461  | 0 | 0            | 0 | 0            | 0 |

|   |              |   |              |   |             |   |              |   |
|---|--------------|---|--------------|---|-------------|---|--------------|---|
| 0 | -0.003210564 | 0 | -0.045814165 | 0 | 0           | 0 | -0.00163861  | 0 |
| 0 | 0.049638878  | 0 | -0.04586002  | 0 | 0           | 0 | -0.001608498 | 0 |
| 0 | -0.001000584 | 0 | -0.044339132 | 0 | 0           | 0 | -0.002625206 | 0 |
| 0 | 0.015293936  | 0 | 0            | 0 | 0           | 0 | -0.011745656 | 0 |
| 0 | 0.01902863   | 0 | 0            | 0 | 0           | 0 | -0.011572516 | 0 |
| 0 | 0.047086598  | 0 | -0.053194529 | 0 | 0           | 0 | 0.00140674   | 0 |
| 0 | -0.012444688 | 0 | -0.042662542 | 0 | 0           | 0 | 0.001047289  | 0 |
| 0 | 0.031785742  | 0 | -0.04253362  | 0 | 0           | 0 | -0.005737681 | 0 |
| 0 | 0.052317812  | 0 | -0.043893161 | 0 | 0           | 0 | -0.00565013  | 0 |
| 0 | 0            | 0 | -0.042597472 | 0 | 0           | 0 | -0.005747756 | 0 |
| 0 | 0.051569175  | 0 | -0.042720568 | 0 | 0           | 0 | 0            | 0 |
| 0 | 0.052204445  | 0 | -0.043127872 | 0 | 0           | 0 | -0.005536941 | 0 |
| 0 | -0.001098262 | 0 | 0            | 0 | 0           | 0 | -0.006281561 | 0 |
| 0 | 0.050947745  | 0 | -0.042106418 | 0 | 0           | 0 | -0.005774966 | 0 |
| 0 | 0.036987395  | 0 | 0            | 0 | 0           | 0 | -0.009491861 | 0 |
| 0 | 0.060828878  | 0 | 0            | 0 | 0           | 0 | -0.009555803 | 0 |
| 0 | 0            | 0 | 0            | 0 | 0           | 0 | -0.009506098 | 0 |
| 0 | 0.059351202  | 0 | 0            | 0 | 0           | 0 | 0            | 0 |
| 0 | 0.033176905  | 0 | 0            | 0 | 0           | 0 | -0.009747708 | 0 |
| 0 | 0            | 0 | 0            | 0 | 0           | 0 | -0.009710771 | 0 |
| 0 | 0.016909448  | 0 | 0            | 0 | 0           | 0 | -0.009443803 | 0 |
| 0 | 0.061993318  | 0 | 0            | 0 | 0           | 0 | -0.009290629 | 0 |
| 0 | 0.017459436  | 0 | 0            | 0 | 0           | 0 | 0            | 0 |
| 0 | 0.059057447  | 0 | 0            | 0 | 0           | 0 | -0.00943076  | 0 |
| 0 | 0.016375042  | 0 | 0            | 0 | 0           | 0 | -0.009669261 | 0 |
| 0 | 0.017533386  | 0 | 0            | 0 | 0           | 0 | -0.009215721 | 0 |
| 0 | 0.042900131  | 0 | -0.049190873 | 0 | 0           | 0 | 0.012976778  | 0 |
| 0 | 0            | 0 | -0.038179372 | 0 | 0           | 0 | -0.02415135  | 0 |
| 0 | 0.063691677  | 0 | 0            | 0 | 0           | 0 | -0.007087586 | 0 |
| 0 | 0.045926019  | 0 | -0.062688457 | 0 | 0           | 0 | 0.010049841  | 0 |
| 0 | -0.012112304 | 0 | 0            | 0 | 0           | 0 | 0.000421231  | 0 |
| 0 | 0.057991552  | 0 | 0            | 0 | 0           | 0 | 0.002058615  | 0 |
| 0 | 0            | 0 | 0.2060931    | 0 | -0.25766184 | 0 | 0            | 0 |
| 0 | 0.033855149  | 0 | 0.20607533   | 0 | -0.25772069 | 0 | 0            | 0 |
| 0 | 0.022042463  | 0 | 0.20792191   | 0 | -0.25425605 | 0 | 0            | 0 |
| 0 | 0            | 0 | 0.20790696   | 0 | -0.25422468 | 0 | 0            | 0 |
| 0 | 0            | 0 | 0.20799459   | 0 | -0.25665085 | 0 | -0.010491585 | 0 |
| 0 | 0.024603829  | 0 | 0.20518147   | 0 | -0.2544367  | 0 | -0.007694686 | 0 |
| 0 | 0            | 0 | 0.20516672   | 0 | -0.25440723 | 0 | -0.007672855 | 0 |
| 0 | 0            | 0 | 0.20550307   | 0 | -0.26082936 | 0 | -0.00898956  | 0 |
| 0 | 0            | 0 | 0.20897282   | 0 | -0.26102826 | 0 | 0            | 0 |
| 0 | 0.014664382  | 0 | 0.20598808   | 0 | -0.25557893 | 0 | 0            | 0 |
| 0 | 0.027297816  | 0 | 0.20592947   | 0 | -0.25573138 | 0 | 0            | 0 |
| 0 | 0            | 0 | 0.20589947   | 0 | -0.25570294 | 0 | 0            | 0 |
| 0 | 0            | 0 | 0.20359342   | 0 | -0.25053331 | 0 | -0.002837565 | 0 |
| 0 | 0.023704724  | 0 | 0.20358402   | 0 | -0.25059555 | 0 | -0.002836078 | 0 |
| 0 | -0.004673895 | 0 | 0.2041199    | 0 | -0.25117083 | 0 | 0            | 0 |

|   |              |   |            |   |             |   |              |   |
|---|--------------|---|------------|---|-------------|---|--------------|---|
| 0 | 0            | 0 | 0.20250776 | 0 | -0.25056535 | 0 | -0.009263327 | 0 |
| 0 | 0.059680444  | 0 | 0.20245456 | 0 | -0.25061563 | 0 | -0.009269142 | 0 |
| 0 | 0            | 0 | 0.20231682 | 0 | -0.25510671 | 0 | -0.004765636 | 0 |
| 0 | 0.032957026  | 0 | 0.2023066  | 0 | -0.25518015 | 0 | -0.00475341  | 0 |
| 0 | 0            | 0 | 0.20240873 | 0 | -0.25283756 | 0 | 0            | 0 |
| 0 | 0.006749593  | 0 | 0.20315905 | 0 | -0.25586327 | 0 | 0            | 0 |
| 0 | 0.063662936  | 0 | 0.20242635 | 0 | -0.25283913 | 0 | 0            | 0 |
| 0 | 0            | 0 | 0.20685148 | 0 | -0.25682038 | 0 | -0.010121973 | 0 |
| 0 | 0.016141358  | 0 | 0.20390382 | 0 | -0.25171522 | 0 | 0            | 0 |
| 0 | -0.001783404 | 0 | 0.2023779  | 0 | -0.25204493 | 0 | -0.002965785 | 0 |
| 0 | 0.032172942  | 0 | 0.2032782  | 0 | -0.25867344 | 0 | 0            | 0 |
| 0 | 0            | 0 | 0.20325642 | 0 | -0.25871688 | 0 | 0            | 0 |
| 0 | 0.019094114  | 0 | 0.20410649 | 0 | -0.25425955 | 0 | -0.005831375 | 0 |
| 0 | 0            | 0 | 0.20121225 | 0 | -0.24983347 | 0 | -0.007565153 | 0 |
| 0 | 0            | 0 | 0.20410644 | 0 | -0.25435871 | 0 | -0.005869818 | 0 |
| 0 | 0.010813129  | 0 | 0.20073098 | 0 | -0.2503248  | 0 | -0.006785589 | 0 |
| 0 | 0.055118205  | 0 | 0.20122704 | 0 | -0.24983551 | 0 | -0.00765807  | 0 |
| 0 | 0.048493644  | 0 | 0.20483206 | 0 | -0.25524093 | 0 | 0            | 0 |
| 0 | 0.01275863   | 0 | 0.2019899  | 0 | -0.25108158 | 0 | 0            | 0 |
| 0 | 0            | 0 | 0.20464156 | 0 | -0.26039516 | 0 | -0.008516447 | 0 |
| 0 | 0.044514239  | 0 | 0.1975844  | 0 | -0.2599372  | 0 | -0.00065266  | 0 |
| 0 | 0.045042596  | 0 | 0.19773391 | 0 | -0.26002131 | 0 | 0            | 0 |
| 0 | 0            | 0 | 0.19754115 | 0 | -0.25995736 | 0 | -0.000626117 | 0 |
| 0 | 0.05009296   | 0 | 0.20257982 | 0 | -0.25559269 | 0 | -0.005491551 | 0 |
| 0 | 0.025165395  | 0 | 0.20225986 | 0 | -0.25597754 | 0 | -0.005369105 | 0 |
| 0 | 0            | 0 | 0.2022567  | 0 | -0.25603262 | 0 | -0.005394386 | 0 |
| 0 | 0.025884554  | 0 | 0.20845925 | 0 | -0.2590905  | 0 | -0.005685689 | 0 |
| 0 | 0            | 0 | 0.20844255 | 0 | -0.2590568  | 0 | -0.005661845 | 0 |
| 0 | 0.027368197  | 0 | 0.20851773 | 0 | -0.25981133 | 0 | -0.005569169 | 0 |
| 0 | 0            | 0 | 0.20848412 | 0 | -0.25978153 | 0 | -0.005540233 | 0 |
| 0 | 0.049116124  | 0 | 0.20292605 | 0 | -0.25686722 | 0 | 0            | 0 |
| 0 | 0.014814315  | 0 | 0.20897737 | 0 | -0.25913614 | 0 | -0.005619578 | 0 |
| 0 | 0.028834518  | 0 | 0.20888166 | 0 | -0.26035398 | 0 | 0            | 0 |
| 0 | 0            | 0 | 0.20885234 | 0 | -0.26033001 | 0 | 0            | 0 |
| 0 | 0.014703401  | 0 | 0.20899021 | 0 | -0.26059499 | 0 | 0            | 0 |
| 0 | 0.014926506  | 0 | 0.20900198 | 0 | -0.25984422 | 0 | 0            | 0 |
| 0 | 0            | 0 | 0.20255537 | 0 | -0.2417285  | 0 | -0.00831289  | 0 |
| 0 | 0.011323224  | 0 | 0.20241153 | 0 | -0.24227829 | 0 | -0.008226492 | 0 |
| 0 | 0.05463149   | 0 | 0.20254503 | 0 | -0.24173503 | 0 | -0.008398006 | 0 |
| 0 | 0.060579224  | 0 | 0.19874253 | 0 | -0.25306432 | 0 | -0.005664439 | 0 |
| 0 | 0            | 0 | 0.19867265 | 0 | -0.25310683 | 0 | -0.005581217 | 0 |
| 0 | 0.010691141  | 0 | 0.20338453 | 0 | -0.24301061 | 0 | 0            | 0 |
| 0 | 0.045190126  | 0 | 0.19935569 | 0 | -0.25396233 | 0 | 0            | 0 |
| 0 | 0.044806649  | 0 | 0.19663209 | 0 | -0.2550882  | 0 | -0.002861166 | 0 |
| 0 | 0            | 0 | 0.21004024 | 0 | -0.2617021  | 0 | -0.008244559 | 0 |
| 0 | -0.004223795 | 0 | 0.19988649 | 0 | -0.24027937 | 0 | -0.003839322 | 0 |
| 0 | -0.001479117 | 0 | 0.20427898 | 0 | -0.26232432 | 0 | 0            | 0 |

|   |              |   |            |   |              |   |              |   |
|---|--------------|---|------------|---|--------------|---|--------------|---|
| 0 | 0            | 0 | 0.20429469 | 0 | -0.26233056  | 0 | 0.00016334   | 0 |
| 0 | -0.001425747 | 0 | 0.20419861 | 0 | -0.26218487  | 0 | 0.000162016  | 0 |
| 0 | 0            | 0 | 0.20460285 | 0 | -0.25504526  | 0 | -0.005606288 | 0 |
| 0 | 0.01313353   | 0 | 0.20471311 | 0 | -0.25525161  | 0 | -0.00557019  | 0 |
| 0 | 0.042884735  | 0 | 0.20428778 | 0 | -0.26247444  | 0 | 0.000196438  | 0 |
| 0 | 0.054975625  | 0 | 0.20460315 | 0 | -0.25502287  | 0 | -0.005699339 | 0 |
| 0 | 0.013019846  | 0 | 0.20512987 | 0 | -0.25590645  | 0 | 0            | 0 |
| 0 | 0.047958444  | 0 | 0.19844346 | 0 | -0.25141232  | 0 | -0.005351613 | 0 |
| 0 | 0.002476461  | 0 | 0.20299112 | 0 | -0.25837754  | 0 | -0.001652768 | 0 |
| 0 | 0.013166157  | 0 | 0.2045392  | 0 | -0.24877805  | 0 | -0.006285258 | 0 |
| 0 | 0.027138116  | 0 | 0.20537275 | 0 | -0.2608944   | 0 | -0.003277494 | 0 |
| 0 | 0.050896484  | 0 | 0.20558584 | 0 | -0.26032549  | 0 | -0.003434287 | 0 |
| 0 | 0.050645314  | 0 | 0.20568922 | 0 | -0.26146774  | 0 | -0.003234267 | 0 |
| 0 | 0.050225796  | 0 | 0.20577517 | 0 | -0.26140961  | 0 | 0            | 0 |
| 0 | 0            | 0 | 0.20536019 | 0 | -0.26093758  | 0 | -0.003302544 | 0 |
| 0 | 0.045896631  | 0 | 0.19335264 | 0 | -0.25858501  | 0 | 0.003417583  | 0 |
| 0 | 0.047673684  | 0 | 0.19962713 | 0 | -0.24310897  | 0 | -0.005977035 | 0 |
| 0 | -0.014114213 | 0 | 0.20318123 | 0 | -0.2568395   | 0 | 0.003791288  | 0 |
| 0 | 0.048833351  | 0 | 0.20173    | 0 | -0.25650512  | 0 | -0.003363227 | 0 |
| 0 | 0            | 0 | 0          | 0 | -0.057334189 | 0 | -0.009321523 | 0 |
| 0 | 0.033382939  | 0 | 0          | 0 | -0.057408256 | 0 | -0.009310563 | 0 |
| 0 | 0            | 0 | 0          | 0 | -0.057894013 | 0 | 0            | 0 |
| 0 | 0.036213225  | 0 | 0          | 0 | -0.057905278 | 0 | 0            | 0 |
| 0 | 0.012418361  | 0 | 0          | 0 | -0.057266848 | 0 | 0            | 0 |
| 0 | 0.041367993  | 0 | 0.18759713 | 0 | -0.24813045  | 0 | 0.01644227   | 0 |
| 0 | 0.021130831  | 0 | 0          | 0 | -0.051952711 | 0 | -0.009616412 | 0 |
| 0 | 0            | 0 | 0          | 0 | -0.051937913 | 0 | -0.009595471 | 0 |
| 0 | 0.044696042  | 0 | 0.1941489  | 0 | -0.26843108  | 0 | 0.011188171  | 0 |
| 0 | 0.011657829  | 0 | 0          | 0 | -0.052493451 | 0 | 0            | 0 |
| 0 | 0            | 0 | 0          | 0 | -0.058018064 | 0 | -0.012547395 | 0 |
| 0 | 0            | 0 | 0.200098   | 0 | -0.25085101  | 0 | -0.021634345 | 0 |
| 0 | 0            | 0 | 0          | 0 | -0.056512402 | 0 | -0.009236014 | 0 |
| 0 | 0            | 0 | 0          | 0 | -0.055930945 | 0 | -0.008987424 | 0 |
| 0 | 0.027768923  | 0 | 0          | 0 | -0.055928648 | 0 | -0.009019274 | 0 |
| 0 | 0.014807836  | 0 | 0          | 0 | -0.054870323 | 0 | -0.009082674 | 0 |
| 0 | 0.060571742  | 0 | 0          | 0 | -0.056490764 | 0 | -0.009341495 | 0 |
| 0 | -0.003500439 | 0 | 0          | 0 | -0.052761828 | 0 | -0.005018742 | 0 |
| 0 | 0.015974677  | 0 | 0          | 0 | -0.053917901 | 0 | -0.011111596 | 0 |
| 0 | 0.007630982  | 0 | 0          | 0 | -0.058320955 | 0 | -0.00691565  | 0 |
| 0 | 0.013846521  | 0 | 0          | 0 | -0.056510399 | 0 | 0            | 0 |
| 0 | 0.009031873  | 0 | 0          | 0 | -0.05710811  | 0 | 0            | 0 |
| 0 | 0.033198163  | 0 | 0          | 0 | -0.06138042  | 0 | -0.007124289 | 0 |
| 0 | 0            | 0 | 0          | 0 | -0.061445644 | 0 | -0.007116295 | 0 |
| 0 | 0.044016731  | 0 | 0          | 0 | -0.061716994 | 0 | 0            | 0 |
| 0 | 0.012281681  | 0 | 0          | 0 | -0.0551903   | 0 | -0.008883048 | 0 |
| 0 | 0.042947898  | 0 | 0          | 0 | -0.066743056 | 0 | -0.00328299  | 0 |
| 0 | 0.046617794  | 0 | 0          | 0 | -0.055914938 | 0 | -0.007385451 | 0 |

|   |              |   |              |   |              |   |              |   |
|---|--------------|---|--------------|---|--------------|---|--------------|---|
| 0 | 0.047037728  | 0 | 0            | 0 | -0.059944241 | 0 | -0.00687987  | 0 |
| 0 | 0.043086935  | 0 | 0            | 0 | -0.060568452 | 0 | -0.007058701 | 0 |
| 0 | 0.010364736  | 0 | 0            | 0 | -0.045558345 | 0 | -0.009633465 | 0 |
| 0 | 0            | 0 | 0            | 0 | -0.057846669 | 0 | -0.006850212 | 0 |
| 0 | 0.029807044  | 0 | 0            | 0 | -0.057838371 | 0 | -0.006890024 | 0 |
| 0 | 0.014454095  | 0 | 0            | 0 | -0.056828754 | 0 | -0.006973407 | 0 |
| 0 | 0.014008615  | 0 | 0            | 0 | -0.058157812 | 0 | -0.006739022 | 0 |
| 0 | 0.015848648  | 0 | 0            | 0 | -0.058251775 | 0 | 0            | 0 |
| 0 | 0.000177363  | 0 | 0            | 0 | -0.063656439 | 0 | -0.001883112 | 0 |
| 0 | 0.012771487  | 0 | 0            | 0 | -0.057130025 | 0 | -0.006841184 | 0 |
| 0 | 0            | 0 | -0.039175155 | 0 | 0            | 0 | -0.009581052 | 0 |
| 0 | 0.038613348  | 0 | -0.039265246 | 0 | 0            | 0 | -0.009572781 | 0 |
| 0 | 0            | 0 | -0.034674023 | 0 | 0            | 0 | -0.010756435 | 0 |
| 0 | 0.027769678  | 0 | -0.034697974 | 0 | 0            | 0 | -0.010788475 | 0 |
| 0 | 0            | 0 | -0.03833354  | 0 | 0            | 0 | 0            | 0 |
| 0 | 0.038400059  | 0 | -0.038325477 | 0 | 0            | 0 | 0            | 0 |
| 0 | 0.009916966  | 0 | -0.038991731 | 0 | 0            | 0 | 0            | 0 |
| 0 | 0.01457784   | 0 | -0.035192519 | 0 | 0            | 0 | 0            | 0 |
| 0 | 0.047894602  | 0 | 0            | 0 | -0.061834044 | 0 | -0.004724448 | 0 |
| 0 | -0.003353081 | 0 | -0.035703585 | 0 | 0            | 0 | -0.006038976 | 0 |
| 0 | 0            | 0 | -0.036591768 | 0 | 0            | 0 | -0.0102816   | 0 |
| 0 | 0.02985368   | 0 | -0.03658435  | 0 | 0            | 0 | -0.01031805  | 0 |
| 0 | 0            | 0 | -0.03733788  | 0 | 0            | 0 | -0.010512093 | 0 |
| 0 | 0.012439249  | 0 | -0.036530844 | 0 | 0            | 0 | -0.011093546 | 0 |
| 0 | 0.06078558   | 0 | -0.037316687 | 0 | 0            | 0 | -0.010615655 | 0 |
| 0 | 0.015700058  | 0 | -0.038334259 | 0 | 0            | 0 | -0.01014637  | 0 |
| 0 | 0            | 0 | -0.038305408 | 0 | 0            | 0 | -0.014023869 | 0 |
| 0 | 0.01457047   | 0 | -0.037146305 | 0 | 0            | 0 | 0            | 0 |
| 0 | 0.010450306  | 0 | -0.037899579 | 0 | 0            | 0 | 0            | 0 |
| 0 | 0.005081264  | 0 | -0.040318742 | 0 | 0            | 0 | -0.007139945 | 0 |
| 0 | 0.013290766  | 0 | -0.036188653 | 0 | 0            | 0 | -0.010164603 | 0 |
| 0 | 0.011215894  | 0 | -0.029665644 | 0 | 0            | 0 | -0.010722019 | 0 |
| 0 | 0.035059203  | 0 | -0.042298836 | 0 | 0            | 0 | -0.00821432  | 0 |
| 0 | 0            | 0 | -0.042367141 | 0 | 0            | 0 | -0.008210414 | 0 |
| 0 | 0.048390674  | 0 | -0.042591964 | 0 | 0            | 0 | 0            | 0 |
| 0 | 0.050633002  | 0 | -0.039067491 | 0 | 0            | 0 | -0.00836285  | 0 |
| 0 | 0.051461663  | 0 | -0.041052254 | 0 | 0            | 0 | -0.007982965 | 0 |
| 0 | 0.048037372  | 0 | -0.041834614 | 0 | 0            | 0 | -0.008136234 | 0 |
| 0 | 0.046339181  | 0 | -0.050343752 | 0 | 0            | 0 | -0.0025502   | 0 |
| 0 | 0            | 0 | -0.038062587 | 0 | 0            | 0 | -0.008118896 | 0 |
| 0 | 0.031552278  | 0 | -0.038053203 | 0 | 0            | 0 | -0.008157041 | 0 |
| 0 | 0            | 0 | 0            | 0 | 0            | 0 | -0.012244726 | 0 |
| 0 | 0.036491487  | 0 | 0            | 0 | 0            | 0 | -0.01229293  | 0 |
| 0 | 0.015325949  | 0 | -0.039679046 | 0 | 0            | 0 | -0.007945039 | 0 |
| 0 | 0.015563338  | 0 | 0            | 0 | 0            | 0 | -0.012254961 | 0 |
| 0 | 0.015815119  | 0 | -0.038527456 | 0 | 0            | 0 | -0.007930256 | 0 |
| 0 | 0.016382455  | 0 | -0.038488833 | 0 | 0            | 0 | 0            | 0 |

|   |              |   |              |   |             |              |              |
|---|--------------|---|--------------|---|-------------|--------------|--------------|
| 0 | 0.014252644  | 0 | 0            | 0 | 0           | 0            | 0            |
| 0 | 0.002439374  | 0 | 0            | 0 | 0           | -0.008949187 | 0            |
| 0 | 0.01398997   | 0 | -0.037676336 | 0 | 0           | -0.008092402 | 0            |
| 0 | 0.01686415   | 0 | 0            | 0 | 0           | -0.011879082 | 0            |
| 0 | 0.012807157  | 0 | 0            | 0 | 0           | -0.012102111 | 0            |
| 0 | -0.003163667 | 0 | -0.045688924 | 0 | 0           | -0.001644595 | 0            |
| 0 | 0.052567297  | 0 | -0.042501279 | 0 | 0           | -0.00579807  | 0            |
| 0 | 0.060832564  | 0 | 0            | 0 | 0           | -0.009558811 | 0            |
| 0 | 0.017826116  | 0 | 0            | 0 | 0           | -0.009714583 | 0            |
| 0 | 0            | 0 | 0.20493108   | 0 | -0.256594   | 0            | -0.007292648 |
| 0 | 0.032715152  | 0 | 0.20489953   | 0 | -0.25664179 | 0            | -0.007289751 |
| 0 | 0            | 0 | 0.20641985   | 0 | -0.25760522 | 0            | 0            |
| 0 | 0.010608629  | 0 | 0.20608038   | 0 | -0.25766087 | 0            | 0            |
| 0 | 0.032777341  | 0 | 0.20645669   | 0 | -0.25763561 | 0            | 0            |
| 0 | 0.019430749  | 0 | 0.20708331   | 0 | -0.25295562 | 0            | -0.008258322 |
| 0 | 0            | 0 | 0.20707376   | 0 | -0.25293161 | 0            | -0.00824735  |
| 0 | 0.010737902  | 0 | 0.20789448   | 0 | -0.25420388 | 0            | 0            |
| 0 | 0            | 0 | 0.20760814   | 0 | -0.25889616 | 0            | -0.010926508 |
| 0 | 0.014951678  | 0 | 0.20517281   | 0 | -0.25440649 | 0            | -0.007675982 |
| 0 | 0.024735198  | 0 | 0.20513785   | 0 | -0.25445668 | 0            | -0.007697991 |
| 0 | 0            | 0 | 0.20513654   | 0 | -0.25445959 | 0            | -0.007665091 |
| 0 | 0.013186255  | 0 | 0.20590658   | 0 | -0.25571558 | 0            | 0            |
| 0 | -0.005647454 | 0 | 0.20359826   | 0 | -0.25053747 | 0            | -0.002847625 |
| 0 | 0            | 0 | 0.20161725   | 0 | -0.25155078 | 0            | -0.007939571 |
| 0 | 0.06105073   | 0 | 0.20161839   | 0 | -0.2515373  | 0            | -0.008034056 |
| 0 | 0.014391639  | 0 | 0.20249898   | 0 | -0.25057405 | 0            | -0.009248566 |
| 0 | 0.005861219  | 0 | 0.20231596   | 0 | -0.25511124 | 0            | -0.004759088 |
| 0 | 0.009695438  | 0 | 0.20241011   | 0 | -0.25283449 | 0            | 0            |
| 0 | 0.030301313  | 0 | 0.20264471   | 0 | -0.25778312 | 0            | -0.005670507 |
| 0 | 0            | 0 | 0.20262548   | 0 | -0.25782756 | 0            | -0.005678158 |
| 0 | 0.04723323   | 0 | 0.20332246   | 0 | -0.25869733 | 0            | 0            |
| 0 | 0.049461871  | 0 | 0.20416738   | 0 | -0.25433833 | 0            | -0.005915295 |
| 0 | 0.013028268  | 0 | 0.20122727   | 0 | -0.24984299 | 0            | -0.007569626 |
| 0 | 0.045118592  | 0 | 0.19758479   | 0 | -0.25993831 | 0            | -0.000653295 |
| 0 | 0.050023406  | 0 | 0.20232199   | 0 | -0.25600735 | 0            | -0.005441234 |
| 0 | 0.026931491  | 0 | 0.20835336   | 0 | -0.25948377 | 0            | -0.005631208 |
| 0 | 0            | 0 | 0.20832077   | 0 | -0.25945729 | 0            | -0.005608844 |
| 0 | 0.014511788  | 0 | 0.20844095   | 0 | -0.25904833 | 0            | -0.005662376 |
| 0 | 0.014908571  | 0 | 0.20849522   | 0 | -0.25978658 | 0            | -0.005543491 |
| 0 | 0.014462924  | 0 | 0.20884108   | 0 | -0.26030405 | 0            | 0            |
| 0 | 0.010986381  | 0 | 0.20254573   | 0 | -0.24171715 | 0            | -0.008310803 |
| 0 | 0.046117749  | 0 | 0.19872778   | 0 | -0.25307549 | 0            | -0.005623904 |
| 0 | -0.001460558 | 0 | 0.20430805   | 0 | -0.26234462 | 0            | 0.00016496   |
| 0 | 0.013249504  | 0 | 0.20460553   | 0 | -0.25504182 | 0            | -0.005609334 |
| 0 | 0.050800374  | 0 | 0.20542404   | 0 | -0.26090689 | 0            | -0.003351562 |
| 0 | 0.010849498  | 0 | 0            | 0 | -0.0573449  | 0            | -0.009311837 |
| 0 | 0            | 0 | 0            | 0 | -0.05729027 | 0            | -0.009355222 |



|   |             |   |              |   |              |   |              |   |
|---|-------------|---|--------------|---|--------------|---|--------------|---|
| 0 | 0.033075905 | 0 | 0            | 0 | -0.057284897 | 0 | -0.009402955 | 0 |
| 0 | 0.010695386 | 0 | 0            | 0 | -0.057890782 | 0 | 0            | 0 |
| 0 | 0.012071797 | 0 | 0            | 0 | -0.051934607 | 0 | -0.009597986 | 0 |
| 0 | 0.009335612 | 0 | 0            | 0 | -0.056508229 | 0 | -0.009237821 | 0 |
| 0 | 0.014021044 | 0 | 0            | 0 | -0.055926723 | 0 | -0.008990086 | 0 |
| 0 | 0.045212311 | 0 | 0            | 0 | -0.061363561 | 0 | -0.007158664 | 0 |
| 0 | 0.015288488 | 0 | 0            | 0 | -0.057837064 | 0 | -0.006872872 | 0 |
| 0 | 0           | 0 | -0.037763175 | 0 | 0            | 0 | -0.010643466 | 0 |
| 0 | 0.034860619 | 0 | -0.037758109 | 0 | 0            | 0 | -0.010691544 | 0 |
| 0 | 0.008326062 | 0 | -0.039183136 | 0 | 0            | 0 | -0.009573402 | 0 |
| 0 | 0.012700002 | 0 | -0.034670578 | 0 | 0            | 0 | -0.010758664 | 0 |
| 0 | 0.011714637 | 0 | -0.038326275 | 0 | 0            | 0 | 0            | 0 |
| 0 | 0.014942351 | 0 | -0.036583792 | 0 | 0            | 0 | -0.010286154 | 0 |
| 0 | 0.010477013 | 0 | -0.037333247 | 0 | 0            | 0 | -0.010513978 | 0 |
| 0 | 0.049784423 | 0 | -0.042276182 | 0 | 0            | 0 | -0.008256352 | 0 |
| 0 | 0.015149147 | 0 | -0.038058959 | 0 | 0            | 0 | -0.008122677 | 0 |
| 0 | 0.014527895 | 0 | 0            | 0 | 0            | 0 | -0.012246807 | 0 |
| 0 | 0           | 0 | 0.20561549   | 0 | -0.256304    | 0 | -0.008037718 | 0 |
| 0 | 0.030126938 | 0 | 0.20564992   | 0 | -0.2563326   | 0 | -0.00807759  | 0 |
| 0 | 0.009282542 | 0 | 0.20491148   | 0 | -0.25658439  | 0 | -0.00730322  | 0 |
| 0 | 0.011575771 | 0 | 0.20641727   | 0 | -0.2575945   | 0 | 0            | 0 |
| 0 | 0.012759613 | 0 | 0.20712574   | 0 | -0.2529851   | 0 | -0.008238673 | 0 |
| 0 | 0.014958426 | 0 | 0.20514023   | 0 | -0.25445763  | 0 | -0.007668894 | 0 |
| 0 | 0.01007722  | 0 | 0.20158002   | 0 | -0.25152574  | 0 | -0.007932876 | 0 |
| 0 | 0.048178675 | 0 | 0.20268934   | 0 | -0.25780169  | 0 | -0.005722208 | 0 |
| 0 | 0.015026532 | 0 | 0.20833329   | 0 | -0.259464    | 0 | -0.005605069 | 0 |
| 0 | 0.011010652 | 0 | 0            | 0 | -0.057285361 | 0 | -0.00935731  | 0 |
| 0 | 0.012070882 | 0 | -0.037758279 | 0 | 0            | 0 | -0.010645587 | 0 |
| 0 | 0.01378627  | 0 | 0.20561083   | 0 | -0.25629203  | 0 | -0.00804866  | 0 |

SUPPLEMENTARY TABLE 6

| Model    | BIC     | Loglike  | H2r       | SE | bsnp_rs2938864 | SE | bsnp_rs1001646 |
|----------|---------|----------|-----------|----|----------------|----|----------------|
| cov1     | -0.2036 | -466.662 | 0.4141379 | 0  | -0.11730652    | 0  | 0              |
| cov0     | 0       | -470.278 | 0.4191907 | 0  | 0              | 0  | 0              |
| cov5     | 1.0534  | -467.29  | 0.415772  | 0  | 0              | 0  | 0              |
| cov9     | 1.4954  | -467.511 | 0.4097978 | 0  | 0              | 0  | 0              |
| cov10    | 1.5331  | -467.53  | 0.4103697 | 0  | 0              | 0  | 0              |
| cov6     | 2.1785  | -467.853 | 0.4148549 | 0  | 0              | 0  | 0              |
| cov4     | 2.2903  | -467.909 | 0.4129426 | 0  | 0              | 0  | 0              |
| cov2     | 2.3505  | -467.939 | 0.4155531 | 0  | 0              | 0  | -0.09337137    |
| cov11    | 3.5086  | -468.518 | 0.4156561 | 0  | 0              | 0  | 0              |
| cov5_10  | 3.9851  | -465.242 | 0.4083374 | 0  | 0              | 0  | 0              |
| cov5_9   | 4.1737  | -465.336 | 0.4080858 | 0  | 0              | 0  | 0              |
| cov1_10  | 5.0168  | -465.757 | 0.4101466 | 0  | -0.090243553   | 0  | 0              |
| cov1_9   | 5.1213  | -465.81  | 0.4099249 | 0  | -0.089402998   | 0  | 0              |
| cov4_10  | 5.134   | -465.816 | 0.4060856 | 0  | 0              | 0  | 0              |
| cov4_9   | 5.2307  | -465.864 | 0.4057511 | 0  | 0              | 0  | 0              |
| cov1_6   | 6.4553  | -466.477 | 0.4145425 | 0  | -0.17623011    | 0  | 0              |
| cov1_3   | 6.5112  | -466.505 | 0.4165893 | 0  | -0.1205726     | 0  | 0              |
| cov2_10  | 6.6503  | -466.574 | 0.4104636 | 0  | 0              | 0  | -0.064289399   |
| cov2_9   | 6.6885  | -466.593 | 0.4100647 | 0  | 0              | 0  | -0.063355343   |
| cov1_4   | 6.7364  | -466.617 | 0.4134331 | 0  | -0.10321563    | 0  | 0              |
| cov1_11  | 6.7489  | -466.624 | 0.4143902 | 0  | -0.13161033    | 0  | 0              |
| cov1_2   | 6.7759  | -466.637 | 0.4141951 | 0  | -0.13286559    | 0  | 0.0181323      |
| cov1_5   | 6.7763  | -466.637 | 0.4141993 | 0  | -0.10039068    | 0  | 0              |
| cov1_7   | 6.8217  | -466.66  | 0.4142493 | 0  | -0.11710126    | 0  | 0              |
| cov6_10  | 6.8217  | -466.66  | 0.4100576 | 0  | 0              | 0  | 0              |
| cov1_8   | 6.8244  | -466.661 | 0.4140756 | 0  | -0.11741721    | 0  | 0              |
| cov6_9   | 6.8921  | -466.695 | 0.409732  | 0  | 0              | 0  | 0              |
| cov7     | 6.9581  | -470.243 | 0.4194849 | 0  | 0              | 0  | 0              |
| cov3     | 6.988   | -470.258 | 0.4200829 | 0  | 0              | 0  | 0              |
| cov8     | 7       | -470.264 | 0.4193874 | 0  | 0              | 0  | 0              |
| cov10_11 | 7.0152  | -466.757 | 0.4096663 | 0  | 0              | 0  | 0              |
| cov9_11  | 7.0893  | -466.794 | 0.4093075 | 0  | 0              | 0  | 0              |
| cov2_5   | 7.8218  | -467.16  | 0.4151871 | 0  | 0              | 0  | -0.033054178   |
| cov5_6   | 7.8841  | -467.191 | 0.4151072 | 0  | 0              | 0  | 0              |
| cov3_9   | 7.9461  | -467.222 | 0.4120364 | 0  | 0              | 0  | 0              |
| cov3_10  | 7.9514  | -467.225 | 0.4127024 | 0  | 0              | 0  | 0              |
| cov5_11  | 7.9699  | -467.234 | 0.4152379 | 0  | 0              | 0  | 0              |
| cov5_7   | 8.0474  | -467.273 | 0.4160849 | 0  | 0              | 0  | 0              |
| cov4_5   | 8.0605  | -467.279 | 0.4152839 | 0  | 0              | 0  | 0              |
| cov5_8   | 8.0738  | -467.286 | 0.4159326 | 0  | 0              | 0  | 0              |
| cov3_5   | 8.0816  | -467.29  | 0.4156191 | 0  | 0              | 0  | 0              |
| cov4_6   | 8.3431  | -467.421 | 0.4129384 | 0  | 0              | 0  | 0              |
| cov9_10  | 8.471   | -467.485 | 0.4099483 | 0  | 0              | 0  | 0              |
| cov8_9   | 8.5213  | -467.51  | 0.4097195 | 0  | 0              | 0  | 0              |
| cov7_9   | 8.5225  | -467.51  | 0.4098571 | 0  | 0              | 0  | 0              |

|            |         |          |           |   |              |   |              |
|------------|---------|----------|-----------|---|--------------|---|--------------|
| cov8_10    | 8.5588  | -467.529 | 0.4102883 | 0 | 0            | 0 | 0            |
| cov7_10    | 8.5605  | -467.529 | 0.4104263 | 0 | 0            | 0 | 0            |
| cov4_11    | 8.6678  | -467.583 | 0.4124936 | 0 | 0            | 0 | 0            |
| cov2_6     | 8.707   | -467.603 | 0.414715  | 0 | 0            | 0 | -0.048961676 |
| cov2_4     | 8.8387  | -467.668 | 0.4135882 | 0 | 0            | 0 | -0.050351059 |
| cov3_6     | 8.9534  | -467.726 | 0.4170516 | 0 | 0            | 0 | 0            |
| cov6_11    | 9.0356  | -467.767 | 0.4145654 | 0 | 0            | 0 | 0            |
| cov2_11    | 9.0579  | -467.778 | 0.4148818 | 0 | 0            | 0 | -0.071036813 |
| cov2_3     | 9.1392  | -467.819 | 0.4177068 | 0 | 0            | 0 | -0.096189046 |
| cov6_7     | 9.1862  | -467.842 | 0.4150952 | 0 | 0            | 0 | 0            |
| cov6_8     | 9.2058  | -467.852 | 0.4149268 | 0 | 0            | 0 | 0            |
| cov3_4     | 9.2976  | -467.898 | 0.4121663 | 0 | 0            | 0 | 0            |
| cov4_8     | 9.3065  | -467.902 | 0.412741  | 0 | 0            | 0 | 0            |
| cov4_7     | 9.319   | -467.909 | 0.4129098 | 0 | 0            | 0 | 0            |
| cov2_7     | 9.3584  | -467.928 | 0.4157835 | 0 | 0            | 0 | -0.093020763 |
| cov2_8     | 9.3771  | -467.938 | 0.4156343 | 0 | 0            | 0 | -0.093252023 |
| cov3_11    | 10.1069 | -468.303 | 0.4183156 | 0 | 0            | 0 | 0            |
| cov7_11    | 10.28   | -468.389 | 0.4162667 | 0 | 0            | 0 | 0            |
| cov8_11    | 10.3706 | -468.434 | 0.4161681 | 0 | 0            | 0 | 0            |
| cov5_6_10  | 10.4687 | -464.969 | 0.4076631 | 0 | 0            | 0 | 0            |
| cov5_6_9   | 10.6938 | -465.081 | 0.4073551 | 0 | 0            | 0 | 0            |
| cov3_5_10  | 10.7638 | -465.116 | 0.4101721 | 0 | 0            | 0 | 0            |
| cov2_5_10  | 10.8867 | -465.178 | 0.4079514 | 0 | 0            | 0 | 0.025310148  |
| cov5_10_11 | 10.9651 | -465.217 | 0.4083918 | 0 | 0            | 0 | 0            |
| cov3_5_9   | 10.9762 | -465.223 | 0.4098079 | 0 | 0            | 0 | 0            |
| cov5_8_10  | 11.0045 | -465.237 | 0.4081493 | 0 | 0            | 0 | 0            |
| cov1_5_10  | 11.0047 | -465.237 | 0.4081694 | 0 | 0.01073748   | 0 | 0            |
| cov4_5_10  | 11.0128 | -465.241 | 0.4082289 | 0 | 0            | 0 | 0            |
| cov5_9_10  | 11.0137 | -465.241 | 0.4083099 | 0 | 0            | 0 | 0            |
| cov5_7_10  | 11.0142 | -465.242 | 0.4083372 | 0 | 0            | 0 | 0            |
| cov2_5_9   | 11.1023 | -465.286 | 0.4077386 | 0 | 0            | 0 | 0.022373048  |
| cov5_9_11  | 11.1534 | -465.311 | 0.4081189 | 0 | 0            | 0 | 0            |
| cov5_8_9   | 11.1945 | -465.332 | 0.4079142 | 0 | 0            | 0 | 0            |
| cov1_5_9   | 11.1988 | -465.334 | 0.4079698 | 0 | 0.006920854  | 0 | 0            |
| cov4_5_9   | 11.1993 | -465.334 | 0.4079122 | 0 | 0            | 0 | 0            |
| cov5_7_9   | 11.2027 | -465.336 | 0.4081005 | 0 | 0            | 0 | 0            |
| cov1_3_10  | 11.3213 | -465.395 | 0.4130427 | 0 | -0.091748991 | 0 | 0            |
| cov1_6_10  | 11.4034 | -465.436 | 0.4104929 | 0 | -0.16625437  | 0 | 0            |
| cov1_3_9   | 11.4668 | -465.468 | 0.4127147 | 0 | -0.090840976 | 0 | 0            |
| cov1_6_9   | 11.5102 | -465.49  | 0.4102366 | 0 | -0.16512191  | 0 | 0            |
| cov1_4_10  | 11.6008 | -465.535 | 0.4078734 | 0 | -0.054147119 | 0 | 0            |
| cov1_4_9   | 11.7181 | -465.594 | 0.4076425 | 0 | -0.053600561 | 0 | 0            |
| cov1_2_10  | 11.9645 | -465.717 | 0.4101193 | 0 | -0.10988901  | 0 | 0.023203897  |
| cov3_4_10  | 11.991  | -465.73  | 0.4076891 | 0 | 0            | 0 | 0            |
| cov1_10_11 | 11.9984 | -465.734 | 0.4103554 | 0 | -0.10169048  | 0 | 0            |
| cov1_8_10  | 12.0285 | -465.749 | 0.4099016 | 0 | -0.090486977 | 0 | 0            |
| cov1_7_10  | 12.0448 | -465.757 | 0.4100865 | 0 | -0.090307056 | 0 | 0            |

|            |         |          |           |   |              |   |              |
|------------|---------|----------|-----------|---|--------------|---|--------------|
| cov1_9_10  | 12.0458 | -465.757 | 0.4101355 | 0 | -0.090181409 | 0 | 0            |
| cov1_2_9   | 12.0778 | -465.773 | 0.4099116 | 0 | -0.10799491  | 0 | 0.021907368  |
| cov4_10_11 | 12.078  | -465.774 | 0.4062505 | 0 | 0            | 0 | 0            |
| cov4_8_10  | 12.0859 | -465.778 | 0.4055471 | 0 | 0            | 0 | 0            |
| cov1_9_11  | 12.0975 | -465.783 | 0.4101393 | 0 | -0.10144581  | 0 | 0            |
| cov3_4_9   | 12.1031 | -465.786 | 0.4072711 | 0 | 0            | 0 | 0            |
| cov2_4_10  | 12.1117 | -465.79  | 0.4053279 | 0 | 0            | 0 | 0.018278688  |
| cov4_7_10  | 12.131  | -465.8   | 0.4057442 | 0 | 0            | 0 | 0            |
| cov1_8_9   | 12.1345 | -465.802 | 0.4096911 | 0 | -0.089630651 | 0 | 0            |
| cov4_9_10  | 12.1464 | -465.808 | 0.4059225 | 0 | 0            | 0 | 0            |
| cov1_7_9   | 12.1496 | -465.809 | 0.4098754 | 0 | -0.089453972 | 0 | 0            |
| cov4_6_10  | 12.1595 | -465.814 | 0.4061927 | 0 | 0            | 0 | 0            |
| cov4_8_9   | 12.1873 | -465.828 | 0.4052438 | 0 | 0            | 0 | 0            |
| cov4_9_11  | 12.1879 | -465.829 | 0.4059434 | 0 | 0            | 0 | 0            |
| cov2_4_9   | 12.2141 | -465.842 | 0.4050333 | 0 | 0            | 0 | 0.017236046  |
| cov4_7_9   | 12.2307 | -465.85  | 0.405439  | 0 | 0            | 0 | 0            |
| cov4_6_9   | 12.2579 | -465.864 | 0.4058438 | 0 | 0            | 0 | 0            |
| cov1_7_8   | 12.568  | -466.019 | 0.4136068 | 0 | -0.11703478  | 0 | 0            |
| cov7_8     | 12.7057 | -469.602 | 0.4188778 | 0 | 0            | 0 | 0            |
| cov2_3_10  | 12.9622 | -466.216 | 0.4132714 | 0 | 0            | 0 | -0.066130613 |
| cov3_10_11 | 13.0132 | -466.241 | 0.4127551 | 0 | 0            | 0 | 0            |
| cov2_3_9   | 13.0365 | -466.253 | 0.4127695 | 0 | 0            | 0 | -0.065182516 |
| cov3_9_11  | 13.1508 | -466.31  | 0.4122912 | 0 | 0            | 0 | 0            |
| cov3_6_10  | 13.1607 | -466.315 | 0.412785  | 0 | 0            | 0 | 0            |
| cov1_3_6   | 13.1943 | -466.332 | 0.416869  | 0 | -0.17745906  | 0 | 0            |
| cov1_3_8   | 13.2139 | -466.342 | 0.4175348 | 0 | -0.12626461  | 0 | 0            |
| cov3_6_9   | 13.2693 | -466.369 | 0.4123559 | 0 | 0            | 0 | 0            |
| cov1_3_7   | 13.3423 | -466.406 | 0.4173643 | 0 | -0.12504763  | 0 | 0            |
| cov1_4_6   | 13.3833 | -466.426 | 0.4137558 | 0 | -0.16217942  | 0 | 0            |
| cov1_6_11  | 13.4356 | -466.452 | 0.4147469 | 0 | -0.18567788  | 0 | 0            |
| cov1_5_6   | 13.4384 | -466.454 | 0.4145921 | 0 | -0.15961716  | 0 | 0            |
| cov1_2_6   | 13.4446 | -466.457 | 0.4146063 | 0 | -0.18942148  | 0 | 0.016243132  |
| cov2_10_11 | 13.4563 | -466.463 | 0.4100167 | 0 | 0            | 0 | -0.046186482 |
| cov1_6_8   | 13.4819 | -466.476 | 0.4144521 | 0 | -0.17651935  | 0 | 0            |
| cov1_6_7   | 13.4828 | -466.476 | 0.4146131 | 0 | -0.17595789  | 0 | 0            |
| cov2_6_10  | 13.487  | -466.478 | 0.4102634 | 0 | 0            | 0 | -0.041769214 |
| cov1_2_3   | 13.4994 | -466.484 | 0.4166036 | 0 | -0.13465237  | 0 | 0.01645946   |
| cov1_3_11  | 13.5131 | -466.491 | 0.4165982 | 0 | -0.12907928  | 0 | 0            |
| cov2_9_11  | 13.5215 | -466.495 | 0.4096883 | 0 | 0            | 0 | -0.046529599 |
| cov1_3_4   | 13.5318 | -466.5   | 0.416195  | 0 | -0.11566422  | 0 | 0            |
| cov1_3_5   | 13.5399 | -466.505 | 0.4166193 | 0 | -0.12215617  | 0 | 0            |
| cov2_6_9   | 13.5477 | -466.508 | 0.4099321 | 0 | 0            | 0 | -0.042306769 |
| cov1_2_4   | 13.578  | -466.524 | 0.4129789 | 0 | -0.1262843   | 0 | 0.040828052  |
| cov6_10_11 | 13.6384 | -466.554 | 0.409777  | 0 | 0            | 0 | 0            |
| cov2_9_10  | 13.6554 | -466.562 | 0.4102421 | 0 | 0            | 0 | -0.0635113   |
| cov2_8_10  | 13.6718 | -466.57  | 0.410318  | 0 | 0            | 0 | -0.06437293  |
| cov2_7_10  | 13.6792 | -466.574 | 0.4104833 | 0 | 0            | 0 | -0.064277265 |

|            |         |          |           |   |              |   |              |
|------------|---------|----------|-----------|---|--------------|---|--------------|
| cov1_4_11  | 13.6918 | -466.58  | 0.4136977 | 0 | -0.11747429  | 0 | 0            |
| cov2_8_9   | 13.7106 | -466.59  | 0.4099254 | 0 | 0            | 0 | -0.063433181 |
| cov2_7_9   | 13.7174 | -466.593 | 0.4100903 | 0 | 0            | 0 | -0.063339993 |
| cov6_9_11  | 13.7242 | -466.597 | 0.4094797 | 0 | 0            | 0 | 0            |
| cov1_5_11  | 13.728  | -466.599 | 0.4144603 | 0 | -0.11463948  | 0 | 0            |
| cov1_2_11  | 13.7369 | -466.603 | 0.4144243 | 0 | -0.14501646  | 0 | 0.01653912   |
| cov1_2_5   | 13.7521 | -466.611 | 0.4142646 | 0 | -0.11589427  | 0 | 0.018804075  |
| cov1_4_8   | 13.761  | -466.615 | 0.4132923 | 0 | -0.10308795  | 0 | 0            |
| cov1_8_11  | 13.7642 | -466.617 | 0.4141971 | 0 | -0.13381069  | 0 | 0            |
| cov1_4_5   | 13.7644 | -466.617 | 0.4135149 | 0 | -0.10121547  | 0 | 0            |
| cov1_4_7   | 13.7647 | -466.617 | 0.413493  | 0 | -0.10327149  | 0 | 0            |
| cov1_7_11  | 13.7776 | -466.623 | 0.4143612 | 0 | -0.13195398  | 0 | 0            |
| cov1_5_7   | 13.7994 | -466.634 | 0.4143406 | 0 | -0.099734369 | 0 | 0            |
| cov1_2_7   | 13.8016 | -466.635 | 0.4143001 | 0 | -0.13260636  | 0 | 0.018055344  |
| cov1_2_8   | 13.8036 | -466.636 | 0.4141266 | 0 | -0.13302869  | 0 | 0.018179848  |
| cov1_5_8   | 13.8051 | -466.637 | 0.4141641 | 0 | -0.10054818  | 0 | 0            |
| cov5_7_8   | 13.8311 | -466.65  | 0.4154725 | 0 | 0            | 0 | 0            |
| cov6_9_10  | 13.8403 | -466.655 | 0.4099164 | 0 | 0            | 0 | 0            |
| cov6_8_10  | 13.844  | -466.657 | 0.4099164 | 0 | 0            | 0 | 0            |
| cov6_7_10  | 13.8503 | -466.66  | 0.4100946 | 0 | 0            | 0 | 0            |
| cov6_8_9   | 13.9152 | -466.692 | 0.409595  | 0 | 0            | 0 | 0            |
| cov6_7_9   | 13.9205 | -466.695 | 0.4097762 | 0 | 0            | 0 | 0            |
| cov7_10_11 | 13.9832 | -466.726 | 0.4100364 | 0 | 0            | 0 | 0            |
| cov3_7     | 13.9861 | -470.242 | 0.4196453 | 0 | 0            | 0 | 0            |
| cov3_8     | 14.0148 | -470.257 | 0.419969  | 0 | 0            | 0 | 0            |
| cov8_10_11 | 14.0233 | -466.746 | 0.4098907 | 0 | 0            | 0 | 0            |
| cov9_10_11 | 14.0252 | -466.747 | 0.4094893 | 0 | 0            | 0 | 0            |
| cov7_9_11  | 14.0582 | -466.764 | 0.4096796 | 0 | 0            | 0 | 0            |
| cov8_9_11  | 14.098  | -466.784 | 0.4095318 | 0 | 0            | 0 | 0            |
| cov7_8_9   | 14.138  | -466.804 | 0.4090912 | 0 | 0            | 0 | 0            |
| cov7_8_10  | 14.1766 | -466.823 | 0.4096693 | 0 | 0            | 0 | 0            |
| cov3_8_10  | 14.2105 | -466.84  | 0.4137068 | 0 | 0            | 0 | 0            |
| cov3_8_9   | 14.2586 | -466.864 | 0.4129623 | 0 | 0            | 0 | 0            |
| cov3_7_10  | 14.4318 | -466.95  | 0.4136158 | 0 | 0            | 0 | 0            |
| cov3_7_9   | 14.471  | -466.97  | 0.412876  | 0 | 0            | 0 | 0            |
| cov6_7_8   | 14.6967 | -467.083 | 0.4142973 | 0 | 0            | 0 | 0            |
| cov2_5_6   | 14.7972 | -467.133 | 0.4149472 | 0 | 0            | 0 | -0.025011852 |
| cov2_5_11  | 14.824  | -467.147 | 0.4149796 | 0 | 0            | 0 | -0.028996142 |
| cov2_5_7   | 14.8243 | -467.147 | 0.415471  | 0 | 0            | 0 | -0.032549522 |
| cov2_3_5   | 14.8336 | -467.151 | 0.4158329 | 0 | 0            | 0 | -0.035778147 |
| cov2_4_5   | 14.8387 | -467.154 | 0.4155352 | 0 | 0            | 0 | -0.036964731 |
| cov2_5_8   | 14.8462 | -467.158 | 0.4153094 | 0 | 0            | 0 | -0.032839567 |
| cov5_6_7   | 14.8855 | -467.177 | 0.4153945 | 0 | 0            | 0 | 0            |
| cov5_6_11  | 14.8876 | -467.178 | 0.4149424 | 0 | 0            | 0 | 0            |
| cov4_5_6   | 14.8912 | -467.18  | 0.4146236 | 0 | 0            | 0 | 0            |
| cov3_9_10  | 14.8951 | -467.182 | 0.4122403 | 0 | 0            | 0 | 0            |
| cov3_5_6   | 14.8962 | -467.183 | 0.4157245 | 0 | 0            | 0 | 0            |

|             |         |          |           |   |   |   |              |
|-------------|---------|----------|-----------|---|---|---|--------------|
| cov5_6_8    | 14.9084 | -467.189 | 0.4152268 | 0 | 0 | 0 | 0            |
| cov5_7_11   | 14.932  | -467.201 | 0.4155992 | 0 | 0 | 0 | 0            |
| cov4_5_11   | 14.9718 | -467.22  | 0.4146819 | 0 | 0 | 0 | 0            |
| cov5_8_11   | 14.9728 | -467.221 | 0.4154741 | 0 | 0 | 0 | 0            |
| cov3_5_11   | 14.9864 | -467.228 | 0.4157736 | 0 | 0 | 0 | 0            |
| cov3_5_7    | 15.0325 | -467.251 | 0.4149824 | 0 | 0 | 0 | 0            |
| cov4_5_7    | 15.0637 | -467.266 | 0.4156649 | 0 | 0 | 0 | 0            |
| cov4_5_8    | 15.0854 | -467.277 | 0.4154403 | 0 | 0 | 0 | 0            |
| cov3_4_5    | 15.0867 | -467.278 | 0.4149825 | 0 | 0 | 0 | 0            |
| cov3_5_8    | 15.0876 | -467.278 | 0.4152856 | 0 | 0 | 0 | 0            |
| cov2_7_8    | 15.0936 | -467.281 | 0.4151288 | 0 | 0 | 0 | -0.093082964 |
| cov4_7_8    | 15.0984 | -467.284 | 0.4123171 | 0 | 0 | 0 | 0            |
| cov4_6_11   | 15.2817 | -467.375 | 0.4127499 | 0 | 0 | 0 | 0            |
| cov3_4_6    | 15.3341 | -467.402 | 0.4140158 | 0 | 0 | 0 | 0            |
| cov2_4_6    | 15.3366 | -467.403 | 0.4131548 | 0 | 0 | 0 | -0.016288701 |
| cov4_6_8    | 15.3669 | -467.418 | 0.4127964 | 0 | 0 | 0 | 0            |
| cov4_6_7    | 15.3715 | -467.42  | 0.41299   | 0 | 0 | 0 | 0            |
| cov2_3_6    | 15.4509 | -467.46  | 0.4170499 | 0 | 0 | 0 | -0.050508661 |
| cov8_9_10   | 15.4965 | -467.483 | 0.4098647 | 0 | 0 | 0 | 0            |
| cov7_9_10   | 15.4985 | -467.484 | 0.4100024 | 0 | 0 | 0 | 0            |
| cov2_4_11   | 15.5666 | -467.518 | 0.4129721 | 0 | 0 | 0 | -0.029563056 |
| cov3_4_11   | 15.664  | -467.567 | 0.4134741 | 0 | 0 | 0 | 0            |
| cov4_7_11   | 15.6644 | -467.567 | 0.4128161 | 0 | 0 | 0 | 0            |
| cov2_6_11   | 15.6769 | -467.573 | 0.4145231 | 0 | 0 | 0 | -0.044539231 |
| cov4_8_11   | 15.6903 | -467.58  | 0.4126484 | 0 | 0 | 0 | 0            |
| cov3_6_11   | 15.7078 | -467.588 | 0.4171072 | 0 | 0 | 0 | 0            |
| cov2_3_11   | 15.7105 | -467.59  | 0.4174514 | 0 | 0 | 0 | -0.069784663 |
| cov2_6_7    | 15.7188 | -467.594 | 0.4149349 | 0 | 0 | 0 | -0.048771366 |
| cov2_6_8    | 15.7351 | -467.602 | 0.4147686 | 0 | 0 | 0 | -0.048927749 |
| cov3_6_8    | 15.8133 | -467.641 | 0.4177966 | 0 | 0 | 0 | 0            |
| cov2_3_4    | 15.8362 | -467.653 | 0.4147119 | 0 | 0 | 0 | -0.05674306  |
| cov2_4_8    | 15.8646 | -467.667 | 0.4134762 | 0 | 0 | 0 | -0.050009919 |
| cov2_4_7    | 15.8663 | -467.668 | 0.4136648 | 0 | 0 | 0 | -0.050592655 |
| cov3_6_7    | 15.9084 | -467.689 | 0.417569  | 0 | 0 | 0 | 0            |
| cov7_8_11   | 15.9933 | -467.731 | 0.4156192 | 0 | 0 | 0 | 0            |
| cov6_7_11   | 16.0006 | -467.735 | 0.4149571 | 0 | 0 | 0 | 0            |
| cov2_7_11   | 16.0093 | -467.739 | 0.4152753 | 0 | 0 | 0 | -0.067847249 |
| cov2_3_8    | 16.0183 | -467.744 | 0.4184541 | 0 | 0 | 0 | -0.099520799 |
| cov6_8_11   | 16.0431 | -467.756 | 0.414803  | 0 | 0 | 0 | 0            |
| cov2_8_11   | 16.0549 | -467.762 | 0.4151442 | 0 | 0 | 0 | -0.068997382 |
| cov2_3_7    | 16.101  | -467.785 | 0.4182308 | 0 | 0 | 0 | -0.098439349 |
| cov3_4_7    | 16.3157 | -467.892 | 0.4119262 | 0 | 0 | 0 | 0            |
| cov3_4_8    | 16.3263 | -467.898 | 0.4122164 | 0 | 0 | 0 | 0            |
| cov5_7_8_10 | 16.6804 | -464.56  | 0.4075795 | 0 | 0 | 0 | 0            |
| cov5_7_8_9  | 16.8703 | -464.655 | 0.4073344 | 0 | 0 | 0 | 0            |
| cov3_7_11   | 17.1266 | -468.298 | 0.4181203 | 0 | 0 | 0 | 0            |
| cov3_8_11   | 17.1349 | -468.302 | 0.4183806 | 0 | 0 | 0 | 0            |

|              |         |          |           |   |              |   |             |
|--------------|---------|----------|-----------|---|--------------|---|-------------|
| cov1_3_8_10  | 17.2277 | -464.834 | 0.4140383 | 0 | -0.096451604 | 0 | 0           |
| cov1_5_6_10  | 17.2772 | -464.859 | 0.4084007 | 0 | -0.066267135 | 0 | 0           |
| cov3_5_8_10  | 17.3631 | -464.902 | 0.4109058 | 0 | 0            | 0 | 0           |
| cov3_5_6_10  | 17.3934 | -464.917 | 0.4089594 | 0 | 0            | 0 | 0           |
| cov1_3_8_9   | 17.4591 | -464.95  | 0.4136322 | 0 | -0.095244757 | 0 | 0           |
| cov1_5_6_9   | 17.4798 | -464.96  | 0.408163  | 0 | -0.069537254 | 0 | 0           |
| cov2_5_6_10  | 17.4831 | -464.962 | 0.4075622 | 0 | 0            | 0 | 0.00908438  |
| cov5_6_8_10  | 17.4888 | -464.964 | 0.4074889 | 0 | 0            | 0 | 0           |
| cov5_6_9_10  | 17.4913 | -464.966 | 0.4075574 | 0 | 0            | 0 | 0           |
| cov1_3_7_10  | 17.4923 | -464.966 | 0.4139979 | 0 | -0.095958955 | 0 | 0           |
| cov5_6_10_11 | 17.4962 | -464.968 | 0.4076384 | 0 | 0            | 0 | 0           |
| cov4_5_6_10  | 17.4976 | -464.969 | 0.4076277 | 0 | 0            | 0 | 0           |
| cov5_6_7_10  | 17.4978 | -464.969 | 0.4076609 | 0 | 0            | 0 | 0           |
| cov3_5_7_10  | 17.5239 | -464.982 | 0.4107984 | 0 | 0            | 0 | 0           |
| cov3_5_8_9   | 17.6259 | -465.033 | 0.410467  | 0 | 0            | 0 | 0           |
| cov3_5_6_9   | 17.6314 | -465.036 | 0.4085621 | 0 | 0            | 0 | 0           |
| cov1_7_8_10  | 17.7084 | -465.074 | 0.4093275 | 0 | -0.089641078 | 0 | 0           |
| cov1_3_7_9   | 17.712  | -465.076 | 0.4135935 | 0 | -0.094767337 | 0 | 0           |
| cov5_6_8_9   | 17.7154 | -465.078 | 0.4071965 | 0 | 0            | 0 | 0           |
| cov2_5_6_9   | 17.7157 | -465.078 | 0.4072857 | 0 | 0            | 0 | 0.006321059 |
| cov1_3_6_10  | 17.7201 | -465.08  | 0.4133153 | 0 | -0.16703895  | 0 | 0           |
| cov4_5_6_9   | 17.7214 | -465.081 | 0.4072366 | 0 | 0            | 0 | 0           |
| cov5_6_9_11  | 17.7222 | -465.081 | 0.4073389 | 0 | 0            | 0 | 0           |
| cov5_6_7_9   | 17.7228 | -465.081 | 0.4073666 | 0 | 0            | 0 | 0           |
| cov2_3_5_10  | 17.7303 | -465.085 | 0.4096724 | 0 | 0            | 0 | 0.018199923 |
| cov3_5_7_9   | 17.7757 | -465.108 | 0.4103628 | 0 | 0            | 0 | 0           |
| cov1_3_5_10  | 17.7847 | -465.112 | 0.410465  | 0 | -0.010635467 | 0 | 0           |
| cov3_4_5_10  | 17.7903 | -465.115 | 0.4103554 | 0 | 0            | 0 | 0           |
| cov3_5_10_11 | 17.7906 | -465.115 | 0.4101198 | 0 | 0            | 0 | 0           |
| cov4_7_8_10  | 17.7906 | -465.115 | 0.405015  | 0 | 0            | 0 | 0           |
| cov3_5_9_10  | 17.7923 | -465.116 | 0.4101411 | 0 | 0            | 0 | 0           |
| cov1_7_8_9   | 17.8147 | -465.127 | 0.4091068 | 0 | -0.088742769 | 0 | 0           |
| cov2_4_5_10  | 17.8529 | -465.146 | 0.4069462 | 0 | 0            | 0 | 0.035653784 |
| cov1_3_6_9   | 17.8687 | -465.154 | 0.4129531 | 0 | -0.16578559  | 0 | 0           |
| cov4_7_8_9   | 17.8908 | -465.165 | 0.4047019 | 0 | 0            | 0 | 0           |
| cov2_5_10_11 | 17.8997 | -465.17  | 0.4080184 | 0 | 0            | 0 | 0.022694531 |
| cov1_4_6_10  | 17.9065 | -465.173 | 0.4079062 | 0 | -0.1317113   | 0 | 0           |
| cov2_5_8_10  | 17.9068 | -465.173 | 0.4077747 | 0 | 0            | 0 | 0.025242133 |
| cov1_2_5_10  | 17.9076 | -465.174 | 0.4080784 | 0 | -0.011377212 | 0 | 0.02892871  |
| cov2_5_9_10  | 17.9151 | -465.178 | 0.4079182 | 0 | 0            | 0 | 0.025333082 |
| cov2_5_7_10  | 17.9157 | -465.178 | 0.4079578 | 0 | 0            | 0 | 0.025312729 |
| cov2_3_5_9   | 17.9599 | -465.2   | 0.4093791 | 0 | 0            | 0 | 0.015448191 |
| cov5_8_10_11 | 17.9705 | -465.205 | 0.4080994 | 0 | 0            | 0 | 0           |
| cov1_3_5_9   | 17.9909 | -465.215 | 0.4102148 | 0 | -0.014180019 | 0 | 0           |
| cov5_7_10_11 | 17.9914 | -465.216 | 0.4082927 | 0 | 0            | 0 | 0           |
| cov5_9_10_11 | 17.993  | -465.216 | 0.4083452 | 0 | 0            | 0 | 0           |
| cov4_5_10_11 | 17.9937 | -465.217 | 0.4083273 | 0 | 0            | 0 | 0           |

|              |         |          |           |   |              |   |             |
|--------------|---------|----------|-----------|---|--------------|---|-------------|
| cov1_5_10_11 | 17.9942 | -465.217 | 0.4083949 | 0 | -2.88E-05    | 0 | 0           |
| cov3_5_9_11  | 18.0019 | -465.221 | 0.40974   | 0 | 0            | 0 | 0           |
| cov3_4_5_9   | 18.0048 | -465.222 | 0.4098902 | 0 | 0            | 0 | 0           |
| cov1_5_8_10  | 18.025  | -465.233 | 0.4079992 | 0 | 0.010213936  | 0 | 0           |
| cov1_4_6_9   | 18.0264 | -465.233 | 0.4076335 | 0 | -0.13080664  | 0 | 0           |
| cov4_5_8_10  | 18.0303 | -465.235 | 0.407956  | 0 | 0            | 0 | 0           |
| cov1_5_9_10  | 18.0328 | -465.236 | 0.4081261 | 0 | 0.011035644  | 0 | 0           |
| cov1_4_5_10  | 18.033  | -465.237 | 0.408094  | 0 | 0.010434725  | 0 | 0           |
| cov5_8_9_10  | 18.0331 | -465.237 | 0.4081214 | 0 | 0            | 0 | 0           |
| cov1_5_7_10  | 18.0337 | -465.237 | 0.4081784 | 0 | 0.010756823  | 0 | 0           |
| cov4_5_9_10  | 18.0414 | -465.241 | 0.4081972 | 0 | 0            | 0 | 0           |
| cov4_5_7_10  | 18.0419 | -465.241 | 0.4082101 | 0 | 0            | 0 | 0           |
| cov5_7_9_10  | 18.0428 | -465.241 | 0.4083096 | 0 | 0            | 0 | 0           |
| cov1_2_4_10  | 18.0499 | -465.245 | 0.4061576 | 0 | -0.09007232  | 0 | 0.073302427 |
| cov2_4_5_9   | 18.067  | -465.254 | 0.4067062 | 0 | 0            | 0 | 0.032869875 |
| cov2_5_9_11  | 18.112  | -465.276 | 0.4078002 | 0 | 0            | 0 | 0.019519648 |
| cov1_2_5_9   | 18.1195 | -465.28  | 0.4079072 | 0 | -0.013852971 | 0 | 0.026801994 |
| cov2_5_8_9   | 18.1239 | -465.282 | 0.4075759 | 0 | 0            | 0 | 0.022299028 |
| cov2_5_7_9   | 18.1313 | -465.286 | 0.4077602 | 0 | 0            | 0 | 0.022383111 |
| cov5_8_9_11  | 18.1612 | -465.301 | 0.4078416 | 0 | 0            | 0 | 0           |
| cov5_7_9_11  | 18.1805 | -465.31  | 0.4080352 | 0 | 0            | 0 | 0           |
| cov4_5_9_11  | 18.1806 | -465.31  | 0.4079861 | 0 | 0            | 0 | 0           |
| cov1_5_9_11  | 18.1811 | -465.311 | 0.408201  | 0 | -0.004705464 | 0 | 0           |
| cov1_3_4_10  | 18.1935 | -465.317 | 0.4111144 | 0 | -0.068620797 | 0 | 0           |
| cov1_2_4_9   | 18.2104 | -465.325 | 0.4060135 | 0 | -0.088186756 | 0 | 0.070337541 |
| cov4_5_8_9   | 18.2175 | -465.329 | 0.407649  | 0 | 0            | 0 | 0           |
| cov1_5_8_9   | 18.2202 | -465.33  | 0.4078124 | 0 | 0.006419202  | 0 | 0           |
| cov1_4_5_9   | 18.2251 | -465.333 | 0.4078213 | 0 | 0.006375465  | 0 | 0           |
| cov1_5_7_9   | 18.2278 | -465.334 | 0.4079903 | 0 | 0.00698642   | 0 | 0           |
| cov4_5_7_9   | 18.2284 | -465.334 | 0.4079021 | 0 | 0            | 0 | 0           |
| cov1_2_3_10  | 18.2823 | -465.361 | 0.412968  | 0 | -0.10971754  | 0 | 0.021237625 |
| cov1_3_4_9   | 18.3412 | -465.391 | 0.4107718 | 0 | -0.067713802 | 0 | 0           |
| cov1_3_10_11 | 18.3494 | -465.395 | 0.4130518 | 0 | -0.093437074 | 0 | 0           |
| cov1_3_9_10  | 18.3504 | -465.395 | 0.4130538 | 0 | -0.091808391 | 0 | 0           |
| cov3_4_8_10  | 18.3636 | -465.402 | 0.4087481 | 0 | 0            | 0 | 0           |
| cov1_2_6_10  | 18.3654 | -465.403 | 0.4104916 | 0 | -0.18329861  | 0 | 0.021085914 |
| cov1_6_8_10  | 18.4065 | -465.423 | 0.4102029 | 0 | -0.1671115   | 0 | 0           |
| cov1_6_10_11 | 18.4135 | -465.427 | 0.4106315 | 0 | -0.17220344  | 0 | 0           |
| cov1_6_7_10  | 18.4276 | -465.434 | 0.4103706 | 0 | -0.16669267  | 0 | 0           |
| cov1_6_9_10  | 18.4315 | -465.436 | 0.4104513 | 0 | -0.16610167  | 0 | 0           |
| cov1_2_3_9   | 18.4365 | -465.438 | 0.4126605 | 0 | -0.10766192  | 0 | 0.019834306 |
| cov1_2_6_9   | 18.4806 | -465.46  | 0.4102457 | 0 | -0.18106119  | 0 | 0.019704792 |
| cov1_3_9_11  | 18.4932 | -465.467 | 0.4127293 | 0 | -0.093582795 | 0 | 0           |
| cov1_6_8_9   | 18.5151 | -465.478 | 0.4099578 | 0 | -0.16593663  | 0 | 0           |
| cov1_6_9_11  | 18.5166 | -465.478 | 0.4103849 | 0 | -0.17162371  | 0 | 0           |
| cov3_4_8_9   | 18.5322 | -465.486 | 0.4082467 | 0 | 0            | 0 | 0           |
| cov1_6_7_9   | 18.5351 | -465.488 | 0.4101251 | 0 | -0.16551859  | 0 | 0           |



|              |         |          |           |   |              |              |
|--------------|---------|----------|-----------|---|--------------|--------------|
| cov3_4_7_10  | 18.5648 | -465.502 | 0.40863   | 0 | 0            | 0            |
| cov1_4_8_10  | 18.5802 | -465.51  | 0.4073688 | 0 | -0.052944057 | 0            |
| cov1_4_10_11 | 18.5908 | -465.515 | 0.4080912 | 0 | -0.064852679 | 0            |
| cov1_4_7_10  | 18.6145 | -465.527 | 0.4075989 | 0 | -0.053479187 | 0            |
| cov1_4_9_10  | 18.6289 | -465.534 | 0.4078257 | 0 | -0.053845942 | 0            |
| cov1_4_8_9   | 18.7009 | -465.57  | 0.407154  | 0 | -0.052427578 | 0            |
| cov1_4_9_11  | 18.7026 | -465.571 | 0.4078669 | 0 | -0.064991776 | 0            |
| cov3_4_7_9   | 18.7233 | -465.582 | 0.4081321 | 0 | 0            | 0            |
| cov1_4_7_9   | 18.7337 | -465.587 | 0.4073838 | 0 | -0.052968093 | 0            |
| cov3_4_10_11 | 18.8054 | -465.623 | 0.4086488 | 0 | 0            | 0            |
| cov3_4_9_11  | 18.9471 | -465.694 | 0.4082043 | 0 | 0            | 0            |
| cov1_2_10_11 | 18.9549 | -465.697 | 0.4103054 | 0 | -0.11919845  | 0.021969502  |
| cov2_4_10_11 | 18.9656 | -465.703 | 0.4050159 | 0 | 0            | 0.033098725  |
| cov1_2_8_10  | 18.9747 | -465.707 | 0.4098637 | 0 | -0.11032473  | 0.023418981  |
| cov1_8_10_11 | 18.9868 | -465.713 | 0.4100236 | 0 | -0.10519467  | 0            |
| cov3_4_6_10  | 18.9916 | -465.716 | 0.4082052 | 0 | 0            | 0            |
| cov1_2_7_10  | 18.9921 | -465.716 | 0.4100488 | 0 | -0.11001599  | 0.023266248  |
| cov1_2_9_10  | 18.9936 | -465.717 | 0.4101227 | 0 | -0.10991391  | 0.023211298  |
| cov3_4_9_10  | 19.0026 | -465.721 | 0.4075332 | 0 | 0            | 0            |
| cov2_3_8_10  | 19.011  | -465.726 | 0.4143776 | 0 | 0            | -0.069678719 |
| cov2_3_4_10  | 19.0142 | -465.727 | 0.4072921 | 0 | 0            | 0.006651946  |
| cov1_7_10_11 | 19.0175 | -465.729 | 0.4101974 | 0 | -0.10343846  | 0            |
| cov1_9_10_11 | 19.0273 | -465.734 | 0.4103365 | 0 | -0.10160382  | 0            |
| cov2_4_8_10  | 19.0445 | -465.742 | 0.4046162 | 0 | 0            | 0.021579238  |
| cov1_8_9_10  | 19.0575 | -465.749 | 0.4098906 | 0 | -0.090425166 | 0            |
| cov1_2_9_11  | 19.0628 | -465.751 | 0.4101035 | 0 | -0.11792124  | 0.020603939  |
| cov4_8_10_11 | 19.0642 | -465.752 | 0.4057985 | 0 | 0            | 0            |
| cov1_7_9_10  | 19.0738 | -465.757 | 0.4100754 | 0 | -0.090245061 | 0            |
| cov1_8_9_11  | 19.087  | -465.763 | 0.4098113 | 0 | -0.10489636  | 0            |
| cov1_2_8_9   | 19.0897 | -465.765 | 0.4096682 | 0 | -0.10840025  | 0.022103914  |
| cov2_4_9_11  | 19.0952 | -465.768 | 0.4047936 | 0 | 0            | 0.030619794  |
| cov4_6_10_11 | 19.0954 | -465.768 | 0.4060433 | 0 | 0            | 0            |
| cov4_7_10_11 | 19.0962 | -465.768 | 0.406028  | 0 | 0            | 0            |
| cov2_4_7_10  | 19.0963 | -465.768 | 0.4048532 | 0 | 0            | 0.020533713  |
| cov4_9_10_11 | 19.0968 | -465.768 | 0.406126  | 0 | 0            | 0            |
| cov4_8_9_10  | 19.0986 | -465.769 | 0.4053996 | 0 | 0            | 0            |
| cov1_2_7_9   | 19.1058 | -465.773 | 0.4098518 | 0 | -0.10809955  | 0.021957521  |
| cov3_4_6_9   | 19.1104 | -465.775 | 0.4077435 | 0 | 0            | 0            |
| cov2_4_6_10  | 19.1107 | -465.775 | 0.4054376 | 0 | 0            | 0.024863518  |
| cov1_3_7_8   | 19.113  | -465.777 | 0.4166536 | 0 | -0.12478411  | 0            |
| cov4_6_8_10  | 19.1137 | -465.777 | 0.4056219 | 0 | 0            | 0            |
| cov1_7_9_11  | 19.1172 | -465.779 | 0.4099849 | 0 | -0.10314615  | 0            |
| cov2_4_9_10  | 19.1207 | -465.78  | 0.4051374 | 0 | 0            | 0.018888481  |
| cov2_3_4_9   | 19.1273 | -465.784 | 0.4069059 | 0 | 0            | 0.006039369  |
| cov4_7_9_10  | 19.1436 | -465.792 | 0.4055956 | 0 | 0            | 0            |
| cov2_3_8_9   | 19.1524 | -465.796 | 0.4137881 | 0 | 0            | -0.068588727 |
| cov2_4_8_9   | 19.1535 | -465.797 | 0.4043493 | 0 | 0            | 0.020375798  |

|              |         |          |           |   |             |   |              |
|--------------|---------|----------|-----------|---|-------------|---|--------------|
| cov4_6_7_10  | 19.1582 | -465.799 | 0.405836  | 0 | 0           | 0 | 0            |
| cov4_6_9_10  | 19.1735 | -465.807 | 0.406017  | 0 | 0           | 0 | 0            |
| cov4_8_9_11  | 19.1752 | -465.808 | 0.4054945 | 0 | 0           | 0 | 0            |
| cov2_4_7_9   | 19.2031 | -465.822 | 0.4045861 | 0 | 0           | 0 | 0.019344982  |
| cov4_6_9_11  | 19.2049 | -465.822 | 0.4057203 | 0 | 0           | 0 | 0            |
| cov4_7_9_11  | 19.2067 | -465.823 | 0.4057253 | 0 | 0           | 0 | 0            |
| cov4_6_8_9   | 19.216  | -465.828 | 0.4052897 | 0 | 0           | 0 | 0            |
| cov2_4_6_9   | 19.2211 | -465.831 | 0.4051496 | 0 | 0           | 0 | 0.022807403  |
| cov3_6_8_10  | 19.2588 | -465.849 | 0.4137546 | 0 | 0           | 0 | 0            |
| cov4_6_7_9   | 19.259  | -465.85  | 0.4055047 | 0 | 0           | 0 | 0            |
| cov2_3_7_10  | 19.2601 | -465.85  | 0.4143057 | 0 | 0           | 0 | -0.069258993 |
| cov2_7_8_10  | 19.3183 | -465.879 | 0.4097127 | 0 | 0           | 0 | -0.063846046 |
| cov6_7_8_10  | 19.3406 | -465.89  | 0.4092785 | 0 | 0           | 0 | 0            |
| cov2_7_8_9   | 19.3566 | -465.898 | 0.4093103 | 0 | 0           | 0 | -0.06288628  |
| cov1_6_7_8   | 19.3614 | -465.901 | 0.4139262 | 0 | -0.16439677 | 0 | 0            |
| cov2_3_7_9   | 19.3916 | -465.916 | 0.4137203 | 0 | 0           | 0 | -0.068171784 |
| cov3_8_10_11 | 19.3956 | -465.918 | 0.4134894 | 0 | 0           | 0 | 0            |
| cov6_7_8_9   | 19.4146 | -465.927 | 0.4089618 | 0 | 0           | 0 | 0            |
| cov3_6_8_9   | 19.4386 | -465.939 | 0.4132496 | 0 | 0           | 0 | 0            |
| cov3_6_7_10  | 19.5141 | -465.977 | 0.4136854 | 0 | 0           | 0 | 0            |
| cov1_4_7_8   | 19.5173 | -465.979 | 0.4128806 | 0 | -0.10373747 | 0 | 0            |
| cov1_7_8_11  | 19.5312 | -465.986 | 0.4137137 | 0 | -0.13111525 | 0 | 0            |
| cov1_2_7_8   | 19.5501 | -465.995 | 0.4136595 | 0 | -0.13217718 | 0 | 0.017633144  |
| cov1_5_7_8   | 19.5525 | -465.996 | 0.413694  | 0 | -0.10086186 | 0 | 0            |
| cov2_3_10_11 | 19.5767 | -466.008 | 0.4130177 | 0 | 0           | 0 | -0.041259366 |
| cov3_8_9_11  | 19.5903 | -466.015 | 0.4129539 | 0 | 0           | 0 | 0            |
| cov3_7_10_11 | 19.5978 | -466.019 | 0.4134229 | 0 | 0           | 0 | 0            |
| cov7_8_10_11 | 19.5983 | -466.019 | 0.4092714 | 0 | 0           | 0 | 0            |
| cov7_8_9_11  | 19.6743 | -466.057 | 0.4089068 | 0 | 0           | 0 | 0            |
| cov3_6_7_9   | 19.6822 | -466.061 | 0.4131825 | 0 | 0           | 0 | 0            |
| cov2_3_9_11  | 19.6976 | -466.069 | 0.4125856 | 0 | 0           | 0 | -0.041973142 |
| cov3_7_8     | 19.7345 | -469.602 | 0.4189563 | 0 | 0           | 0 | 0            |
| cov3_6_10_11 | 19.7711 | -466.106 | 0.4127696 | 0 | 0           | 0 | 0            |
| cov3_7_9_11  | 19.7821 | -466.111 | 0.41289   | 0 | 0           | 0 | 0            |
| cov2_3_6_10  | 19.7963 | -466.118 | 0.4131061 | 0 | 0           | 0 | -0.043460357 |
| cov2_3_6_9   | 19.8942 | -466.167 | 0.4126716 | 0 | 0           | 0 | -0.04403977  |
| cov1_3_6_8   | 19.896  | -466.168 | 0.4178108 | 0 | -0.18324832 | 0 | 0            |
| cov3_6_9_11  | 19.9115 | -466.176 | 0.4123613 | 0 | 0           | 0 | 0            |
| cov2_3_9_10  | 19.9718 | -466.206 | 0.4130557 | 0 | 0           | 0 | -0.065422467 |
| cov1_3_6_7   | 20.0178 | -466.229 | 0.4176576 | 0 | -0.18264777 | 0 | 0            |
| cov3_9_10_11 | 20.0322 | -466.236 | 0.4126097 | 0 | 0           | 0 | 0            |
| cov3_7_8_10  | 20.0619 | -466.251 | 0.4128406 | 0 | 0           | 0 | 0            |
| cov1_3_5_8   | 20.0891 | -466.265 | 0.4186748 | 0 | -0.16947892 | 0 | 0            |
| cov3_7_8_9   | 20.1008 | -466.27  | 0.4120906 | 0 | 0           | 0 | 0            |
| cov1_3_8_11  | 20.1613 | -466.301 | 0.4176732 | 0 | -0.14190431 | 0 | 0            |
| cov3_6_9_10  | 20.1822 | -466.311 | 0.4126542 | 0 | 0           | 0 | 0            |
| cov1_2_3_6   | 20.1909 | -466.315 | 0.4168946 | 0 | -0.1893813  | 0 | 0.014695417  |

|              |         |          |           |   |             |   |              |
|--------------|---------|----------|-----------|---|-------------|---|--------------|
| cov1_2_3_8   | 20.2052 | -466.323 | 0.4175411 | 0 | -0.13979369 | 0 | 0.015845848  |
| cov1_3_4_6   | 20.2087 | -466.324 | 0.4163363 | 0 | -0.17155796 | 0 | 0            |
| cov1_3_6_11  | 20.2105 | -466.325 | 0.4168793 | 0 | -0.18237274 | 0 | 0            |
| cov1_3_5_6   | 20.2231 | -466.332 | 0.4168951 | 0 | -0.17884044 | 0 | 0            |
| cov1_2_4_6   | 20.2386 | -466.339 | 0.4133316 | 0 | -0.18333916 | 0 | 0.039320585  |
| cov1_3_4_8   | 20.2417 | -466.341 | 0.4177056 | 0 | -0.12834396 | 0 | 0            |
| cov1_3_5_7   | 20.2736 | -466.357 | 0.4183007 | 0 | -0.15962375 | 0 | 0            |
| cov1_3_7_11  | 20.3032 | -466.372 | 0.4174923 | 0 | -0.13936239 | 0 | 0            |
| cov1_2_3_7   | 20.3328 | -466.386 | 0.4173712 | 0 | -0.13870522 | 0 | 0.015995759  |
| cov1_4_6_11  | 20.3666 | -466.403 | 0.4139717 | 0 | -0.17154079 | 0 | 0            |
| cov1_3_4_7   | 20.3713 | -466.406 | 0.4174023 | 0 | -0.12550625 | 0 | 0            |
| cov1_4_6_8   | 20.4051 | -466.423 | 0.4135768 | 0 | -0.16225974 | 0 | 0            |
| cov1_4_5_6   | 20.4124 | -466.426 | 0.4137717 | 0 | -0.16177569 | 0 | 0            |
| cov1_4_6_7   | 20.4124 | -466.426 | 0.4137649 | 0 | -0.16217141 | 0 | 0            |
| cov2_6_10_11 | 20.4157 | -466.428 | 0.4100047 | 0 | 0           | 0 | -0.035946991 |
| cov1_5_6_11  | 20.418  | -466.429 | 0.4148053 | 0 | -0.16901492 | 0 | 0            |
| cov1_2_5_6   | 20.4244 | -466.432 | 0.4146652 | 0 | -0.17276309 | 0 | 0.016901019  |
| cov1_2_6_11  | 20.4308 | -466.435 | 0.4147899 | 0 | -0.19732155 | 0 | 0.015033307  |
| cov1_6_8_11  | 20.451  | -466.446 | 0.4145624 | 0 | -0.18782821 | 0 | 0            |
| cov1_6_7_11  | 20.4642 | -466.452 | 0.4147102 | 0 | -0.18614362 | 0 | 0            |
| cov1_5_6_7   | 20.4644 | -466.452 | 0.4146931 | 0 | -0.15896056 | 0 | 0            |
| cov1_5_6_8   | 20.4662 | -466.453 | 0.4145287 | 0 | -0.16001307 | 0 | 0            |
| cov1_2_3_4   | 20.4668 | -466.453 | 0.4153335 | 0 | -0.13035667 | 0 | 0.03021889   |
| cov2_7_10_11 | 20.4703 | -466.455 | 0.4101997 | 0 | 0           | 0 | -0.044956302 |
| cov1_2_6_8   | 20.4709 | -466.455 | 0.4145108 | 0 | -0.18977884 | 0 | 0.01630592   |
| cov2_9_10_11 | 20.4721 | -466.456 | 0.409864  | 0 | 0           | 0 | -0.045980649 |
| cov1_2_6_7   | 20.4723 | -466.456 | 0.4146712 | 0 | -0.1891337  | 0 | 0.016197883  |
| cov2_8_10_11 | 20.485  | -466.463 | 0.410048  | 0 | 0           | 0 | -0.045985297 |
| cov2_6_9_11  | 20.4882 | -466.464 | 0.4097017 | 0 | 0           | 0 | -0.036859521 |
| cov2_6_9_10  | 20.5045 | -466.472 | 0.4101143 | 0 | 0           | 0 | -0.041831858 |
| cov1_2_3_11  | 20.5056 | -466.473 | 0.416609  | 0 | -0.14175299 | 0 | 0.01561      |
| cov2_6_8_10  | 20.5081 | -466.474 | 0.4101088 | 0 | 0           | 0 | -0.041835567 |
| cov2_6_7_10  | 20.5159 | -466.478 | 0.410285  | 0 | 0           | 0 | -0.041755256 |
| cov1_2_3_5   | 20.5285 | -466.484 | 0.4166128 | 0 | -0.13520919 | 0 | 0.016428643  |
| cov1_3_4_11  | 20.5315 | -466.486 | 0.4161559 | 0 | -0.12391262 | 0 | 0            |
| cov2_7_9_11  | 20.536  | -466.488 | 0.4098698 | 0 | 0           | 0 | -0.045327672 |
| cov1_3_5_11  | 20.5421 | -466.491 | 0.4165996 | 0 | -0.12915347 | 0 | 0            |
| cov2_8_9_11  | 20.5503 | -466.495 | 0.4097164 | 0 | 0           | 0 | -0.046352453 |
| cov1_3_4_5   | 20.5527 | -466.496 | 0.4160883 | 0 | -0.12187957 | 0 | 0            |
| cov1_2_4_11  | 20.5539 | -466.497 | 0.4132297 | 0 | -0.13724051 | 0 | 0.038706069  |
| cov2_6_8_9   | 20.5696 | -466.505 | 0.4097857 | 0 | 0           | 0 | -0.042373281 |
| cov1_2_4_5   | 20.5725 | -466.506 | 0.4123669 | 0 | -0.14391844 | 0 | 0.049853853  |
| cov2_6_7_9   | 20.5765 | -466.508 | 0.4099602 | 0 | 0           | 0 | -0.042288208 |
| cov5_6_7_8   | 20.5789 | -466.509 | 0.4146099 | 0 | 0           | 0 | 0            |
| cov2_5_7_8   | 20.5952 | -466.518 | 0.4148329 | 0 | 0           | 0 | -0.033342485 |
| cov1_2_4_8   | 20.5964 | -466.518 | 0.4127639 | 0 | -0.12654667 | 0 | 0.041642759  |
| cov1_2_4_7   | 20.607  | -466.524 | 0.41297   | 0 | -0.12630286 | 0 | 0.040892025  |

|              |         |          |           |   |             |   |              |
|--------------|---------|----------|-----------|---|-------------|---|--------------|
| cov6_7_10_11 | 20.649  | -466.545 | 0.4099913 | 0 | 0           | 0 | 0            |
| cov6_9_10_11 | 20.6604 | -466.55  | 0.4096652 | 0 | 0           | 0 | 0            |
| cov6_8_10_11 | 20.6667 | -466.553 | 0.409825  | 0 | 0           | 0 | 0            |
| cov2_8_9_10  | 20.6768 | -466.558 | 0.4100962 | 0 | 0           | 0 | -0.063593892 |
| cov2_7_9_10  | 20.6844 | -466.562 | 0.4102611 | 0 | 0           | 0 | -0.063499831 |
| cov1_4_8_11  | 20.6983 | -466.569 | 0.4134138 | 0 | -0.11951531 | 0 | 0            |
| cov5_7_8_11  | 20.7012 | -466.571 | 0.414963  | 0 | 0           | 0 | 0            |
| cov1_2_5_11  | 20.7127 | -466.576 | 0.4145047 | 0 | -0.12801802 | 0 | 0.017209352  |
| cov1_4_7_11  | 20.7183 | -466.579 | 0.4136038 | 0 | -0.1181711  | 0 | 0            |
| cov1_4_5_11  | 20.7193 | -466.58  | 0.4137971 | 0 | -0.11514025 | 0 | 0            |
| cov6_7_9_11  | 20.7346 | -466.587 | 0.4096959 | 0 | 0           | 0 | 0            |
| cov1_5_8_11  | 20.7468 | -466.593 | 0.4142887 | 0 | -0.11709923 | 0 | 0            |
| cov6_8_9_11  | 20.7524 | -466.596 | 0.4095292 | 0 | 0           | 0 | 0            |
| cov1_2_8_11  | 20.7525 | -466.596 | 0.4142325 | 0 | -0.14715068 | 0 | 0.016484272  |
| cov1_5_7_11  | 20.7571 | -466.599 | 0.4144559 | 0 | -0.11470576 | 0 | 0            |
| cov1_2_7_11  | 20.7657 | -466.603 | 0.414397  | 0 | -0.1453331  | 0 | 0.016531451  |
| cov1_2_5_7   | 20.7757 | -466.608 | 0.4143998 | 0 | -0.11519705 | 0 | 0.01872097   |
| cov1_2_5_8   | 20.7807 | -466.61  | 0.414224  | 0 | -0.11609744 | 0 | 0.018827431  |
| cov1_4_5_8   | 20.7897 | -466.615 | 0.4133533 | 0 | -0.10180855 | 0 | 0            |
| cov1_4_5_7   | 20.7922 | -466.616 | 0.4136072 | 0 | -0.10087289 | 0 | 0            |
| cov3_5_7_8   | 20.8092 | -466.625 | 0.414282  | 0 | 0           | 0 | 0            |
| cov4_5_7_8   | 20.8478 | -466.644 | 0.4150599 | 0 | 0           | 0 | 0            |
| cov6_8_9_10  | 20.8626 | -466.651 | 0.4097744 | 0 | 0           | 0 | 0            |
| cov6_7_9_10  | 20.8689 | -466.654 | 0.4099527 | 0 | 0           | 0 | 0            |
| cov4_6_7_8   | 20.9908 | -466.715 | 0.412358  | 0 | 0           | 0 | 0            |
| cov7_9_10_11 | 20.9951 | -466.718 | 0.4098604 | 0 | 0           | 0 | 0            |
| cov8_9_10_11 | 21.0345 | -466.737 | 0.4097116 | 0 | 0           | 0 | 0            |
| cov7_8_9_10  | 21.1125 | -466.776 | 0.4092392 | 0 | 0           | 0 | 0            |
| cov3_8_9_10  | 21.1568 | -466.798 | 0.4132916 | 0 | 0           | 0 | 0            |
| cov2_6_7_8   | 21.3152 | -466.878 | 0.4141629 | 0 | 0           | 0 | -0.044378613 |
| cov3_7_9_10  | 21.3779 | -466.909 | 0.413199  | 0 | 0           | 0 | 0            |
| cov4_7_8_11  | 21.417  | -466.929 | 0.4122131 | 0 | 0           | 0 | 0            |
| cov3_6_7_8   | 21.4252 | -466.933 | 0.4167467 | 0 | 0           | 0 | 0            |
| cov6_7_8_11  | 21.5516 | -466.996 | 0.4141818 | 0 | 0           | 0 | 0            |
| cov2_4_7_8   | 21.6249 | -467.032 | 0.4130703 | 0 | 0           | 0 | -0.051642139 |
| cov2_7_8_11  | 21.7327 | -467.086 | 0.4146131 | 0 | 0           | 0 | -0.067536119 |
| cov2_3_5_6   | 21.7895 | -467.115 | 0.4158647 | 0 | 0           | 0 | -0.027470687 |
| cov2_5_6_7   | 21.8018 | -467.121 | 0.4152258 | 0 | 0           | 0 | -0.024682275 |
| cov2_5_7_11  | 21.8105 | -467.125 | 0.4152908 | 0 | 0           | 0 | -0.027127718 |
| cov2_3_5_11  | 21.815  | -467.128 | 0.415902  | 0 | 0           | 0 | -0.031610353 |
| cov2_5_6_11  | 21.8172 | -467.129 | 0.4148558 | 0 | 0           | 0 | -0.02362226  |
| cov2_5_6_8   | 21.8227 | -467.131 | 0.4150576 | 0 | 0           | 0 | -0.024899047 |
| cov2_4_5_6   | 21.8244 | -467.132 | 0.4151063 | 0 | 0           | 0 | -0.027125441 |
| cov2_4_5_7   | 21.8318 | -467.136 | 0.4160031 | 0 | 0           | 0 | -0.037772306 |
| cov2_3_4_5   | 21.8342 | -467.137 | 0.4167239 | 0 | 0           | 0 | -0.043550781 |
| cov2_5_8_11  | 21.8413 | -467.141 | 0.4151495 | 0 | 0           | 0 | -0.028012801 |
| cov2_4_5_11  | 21.8484 | -467.144 | 0.4152305 | 0 | 0           | 0 | -0.03199992  |

|             |         |          |           |   |   |   |              |
|-------------|---------|----------|-----------|---|---|---|--------------|
| cov2_3_5_7  | 21.8529 | -467.146 | 0.4155773 | 0 | 0 | 0 | -0.033219181 |
| cov2_3_7_8  | 21.8539 | -467.147 | 0.4175039 | 0 | 0 | 0 | -0.098328007 |
| cov2_4_5_8  | 21.8592 | -467.15  | 0.4157666 | 0 | 0 | 0 | -0.037352549 |
| cov2_3_5_8  | 21.8613 | -467.151 | 0.4159236 | 0 | 0 | 0 | -0.036725456 |
| cov5_6_7_11 | 21.872  | -467.156 | 0.415275  | 0 | 0 | 0 | 0            |
| cov3_5_6_11 | 21.8821 | -467.161 | 0.4158112 | 0 | 0 | 0 | 0            |
| cov4_5_6_11 | 21.892  | -467.166 | 0.4144243 | 0 | 0 | 0 | 0            |
| cov4_5_6_7  | 21.9009 | -467.17  | 0.414964  | 0 | 0 | 0 | 0            |
| cov5_6_8_11 | 21.9044 | -467.172 | 0.4151238 | 0 | 0 | 0 | 0            |
| cov3_4_5_6  | 21.9087 | -467.174 | 0.4152026 | 0 | 0 | 0 | 0            |
| cov3_5_6_7  | 21.9144 | -467.177 | 0.4154611 | 0 | 0 | 0 | 0            |
| cov4_5_6_8  | 21.9187 | -467.179 | 0.414723  | 0 | 0 | 0 | 0            |
| cov3_5_6_8  | 21.9238 | -467.182 | 0.4158197 | 0 | 0 | 0 | 0            |
| cov4_5_7_11 | 21.9476 | -467.194 | 0.4151657 | 0 | 0 | 0 | 0            |
| cov3_5_7_11 | 21.9552 | -467.198 | 0.4152144 | 0 | 0 | 0 | 0            |
| cov4_5_8_11 | 21.9834 | -467.212 | 0.4149646 | 0 | 0 | 0 | 0            |
| cov3_4_5_11 | 21.993  | -467.216 | 0.4151552 | 0 | 0 | 0 | 0            |
| cov3_5_8_11 | 22.0018 | -467.221 | 0.415517  | 0 | 0 | 0 | 0            |
| cov3_4_5_7  | 22.0477 | -467.244 | 0.4145245 | 0 | 0 | 0 | 0            |
| cov3_4_7_8  | 22.089  | -467.265 | 0.4112429 | 0 | 0 | 0 | 0            |
| cov3_4_5_8  | 22.0983 | -467.269 | 0.4147599 | 0 | 0 | 0 | 0            |
| cov3_4_6_11 | 22.2312 | -467.336 | 0.4143094 | 0 | 0 | 0 | 0            |
| cov2_3_6_8  | 22.2711 | -467.356 | 0.4178767 | 0 | 0 | 0 | -0.052457167 |
| cov3_4_6_8  | 22.2824 | -467.361 | 0.4147452 | 0 | 0 | 0 | 0            |
| cov2_3_4_6  | 22.2914 | -467.366 | 0.4148635 | 0 | 0 | 0 | -0.024522974 |
| cov2_4_6_11 | 22.2954 | -467.368 | 0.4129111 | 0 | 0 | 0 | -0.010996555 |
| cov4_6_7_11 | 22.2989 | -467.369 | 0.4129487 | 0 | 0 | 0 | 0            |
| cov4_6_8_11 | 22.3108 | -467.375 | 0.4127601 | 0 | 0 | 0 | 0            |
| cov3_4_6_7  | 22.3416 | -467.391 | 0.4144037 | 0 | 0 | 0 | 0            |
| cov2_3_6_11 | 22.3557 | -467.398 | 0.4170501 | 0 | 0 | 0 | -0.044179033 |
| cov2_4_6_8  | 22.3621 | -467.401 | 0.4130311 | 0 | 0 | 0 | -0.015912653 |
| cov2_4_6_7  | 22.3641 | -467.402 | 0.4132358 | 0 | 0 | 0 | -0.016530387 |
| cov2_3_6_7  | 22.376  | -467.408 | 0.4176608 | 0 | 0 | 0 | -0.052030707 |
| cov2_3_4_11 | 22.4969 | -467.468 | 0.4149097 | 0 | 0 | 0 | -0.038313125 |
| cov2_4_7_11 | 22.5671 | -467.504 | 0.4132742 | 0 | 0 | 0 | -0.029127146 |
| cov2_4_8_11 | 22.5908 | -467.515 | 0.4131    | 0 | 0 | 0 | -0.029380231 |
| cov3_6_8_11 | 22.6237 | -467.532 | 0.4176956 | 0 | 0 | 0 | 0            |
| cov2_3_8_11 | 22.6451 | -467.543 | 0.4180263 | 0 | 0 | 0 | -0.073913257 |
| cov2_6_7_11 | 22.6663 | -467.553 | 0.4148313 | 0 | 0 | 0 | -0.043295953 |
| cov3_4_7_11 | 22.686  | -467.563 | 0.4132931 | 0 | 0 | 0 | 0            |
| cov3_4_8_11 | 22.6912 | -467.566 | 0.4135635 | 0 | 0 | 0 | 0            |
| cov2_6_8_11 | 22.6969 | -467.568 | 0.4146769 | 0 | 0 | 0 | -0.043975247 |
| cov3_6_7_11 | 22.698  | -467.569 | 0.4174694 | 0 | 0 | 0 | 0            |
| cov2_3_7_11 | 22.7081 | -467.574 | 0.4177986 | 0 | 0 | 0 | -0.072193475 |
| cov2_3_4_8  | 22.802  | -467.621 | 0.4155648 | 0 | 0 | 0 | -0.063404182 |
| cov2_3_4_7  | 22.851  | -467.646 | 0.4151275 | 0 | 0 | 0 | -0.059913938 |
| cov3_7_8_11 | 22.853  | -467.646 | 0.4174093 | 0 | 0 | 0 | 0            |

|                |         |          |           |   |              |   |             |
|----------------|---------|----------|-----------|---|--------------|---|-------------|
| cov1_3_7_8_10  | 23.1751 | -464.293 | 0.4132151 | 0 | -0.095258263 | 0 | 0           |
| cov3_5_7_8_10  | 23.1966 | -464.304 | 0.4100255 | 0 | 0            | 0 | 0           |
| cov5_6_7_8_10  | 23.2917 | -464.351 | 0.407018  | 0 | 0            | 0 | 0           |
| cov1_3_7_8_9   | 23.3966 | -464.404 | 0.4127997 | 0 | -0.094020859 | 0 | 0           |
| cov3_5_7_8_9   | 23.4496 | -464.43  | 0.4095812 | 0 | 0            | 0 | 0           |
| cov5_6_7_8_9   | 23.5134 | -464.462 | 0.4067242 | 0 | 0            | 0 | 0           |
| cov1_3_6_8_10  | 23.5499 | -464.48  | 0.4143738 | 0 | -0.17638827  | 0 | 0           |
| cov2_5_7_8_10  | 23.5826 | -464.497 | 0.4072037 | 0 | 0            | 0 | 0.025229093 |
| cov5_7_8_10_11 | 23.6625 | -464.537 | 0.4075381 | 0 | 0            | 0 | 0           |
| cov1_5_7_8_10  | 23.6989 | -464.555 | 0.4074119 | 0 | 0.011283276  | 0 | 0           |
| cov4_5_7_8_10  | 23.7083 | -464.56  | 0.4074631 | 0 | 0            | 0 | 0           |
| cov5_7_8_9_10  | 23.7088 | -464.56  | 0.4075456 | 0 | 0            | 0 | 0           |
| cov1_3_6_8_9   | 23.7899 | -464.6   | 0.413926  | 0 | -0.17451844  | 0 | 0           |
| cov2_5_7_8_9   | 23.7996 | -464.605 | 0.4069967 | 0 | 0            | 0 | 0.02229314  |
| cov1_3_6_7_10  | 23.8025 | -464.607 | 0.4143509 | 0 | -0.17669234  | 0 | 0           |
| cov5_7_8_9_11  | 23.8529 | -464.632 | 0.4072723 | 0 | 0            | 0 | 0           |
| cov1_5_7_8_9   | 23.8947 | -464.653 | 0.4072136 | 0 | 0.007534443  | 0 | 0           |
| cov4_5_7_8_9   | 23.8963 | -464.654 | 0.4071462 | 0 | 0            | 0 | 0           |
| cov1_3_6_7_9   | 24.0317 | -464.721 | 0.4139032 | 0 | -0.17478882  | 0 | 0           |
| cov1_3_5_6_10  | 24.0878 | -464.749 | 0.4105293 | 0 | -0.084791908 | 0 | 0           |
| cov3_5_6_8_10  | 24.173  | -464.792 | 0.4098325 | 0 | 0            | 0 | 0           |
| cov1_3_5_8_10  | 24.1805 | -464.796 | 0.4128381 | 0 | -0.061800149 | 0 | 0           |
| cov1_2_3_8_10  | 24.1896 | -464.8   | 0.4139467 | 0 | -0.11428727  | 0 | 0.021083913 |
| cov1_2_5_6_10  | 24.1971 | -464.804 | 0.4083502 | 0 | -0.086007298 | 0 | 0.02691916  |
| cov1_3_8_10_11 | 24.2038 | -464.807 | 0.4141884 | 0 | -0.10915603  | 0 | 0           |
| cov1_3_4_8_10  | 24.211  | -464.811 | 0.4129818 | 0 | -0.083606524 | 0 | 0           |
| cov3_4_7_8_10  | 24.2314 | -464.821 | 0.4078826 | 0 | 0            | 0 | 0           |
| cov1_3_8_9_10  | 24.2559 | -464.833 | 0.41408   | 0 | -0.096672792 | 0 | 0           |
| cov1_6_7_8_10  | 24.2712 | -464.841 | 0.4096123 | 0 | -0.15489845  | 0 | 0           |
| cov1_4_7_8_10  | 24.2826 | -464.847 | 0.4068537 | 0 | -0.053021    | 0 | 0           |
| cov1_5_6_8_10  | 24.291  | -464.851 | 0.4081828 | 0 | -0.067331416 | 0 | 0           |
| cov3_5_6_7_10  | 24.2919 | -464.851 | 0.4096176 | 0 | 0            | 0 | 0           |
| cov1_5_6_10_11 | 24.2941 | -464.853 | 0.4085327 | 0 | -0.071288162 | 0 | 0           |
| cov1_3_5_6_9   | 24.3024 | -464.857 | 0.4102372 | 0 | -0.087737993 | 0 | 0           |
| cov1_4_5_6_10  | 24.3027 | -464.857 | 0.4082224 | 0 | -0.067129654 | 0 | 0           |
| cov1_5_6_9_10  | 24.303  | -464.857 | 0.4083219 | 0 | -0.065863339 | 0 | 0           |
| cov1_5_6_7_10  | 24.3052 | -464.858 | 0.4083443 | 0 | -0.06658086  | 0 | 0           |
| cov1_2_4_6_10  | 24.3481 | -464.88  | 0.4061946 | 0 | -0.16821667  | 0 | 0.073754053 |
| cov1_6_7_8_9   | 24.3796 | -464.895 | 0.4093626 | 0 | -0.15371702  | 0 | 0           |
| cov2_3_5_8_10  | 24.3848 | -464.898 | 0.4107001 | 0 | 0            | 0 | 0.006456237 |
| cov3_4_7_8_9   | 24.3904 | -464.901 | 0.4073761 | 0 | 0            | 0 | 0           |
| cov3_5_8_9_10  | 24.3912 | -464.901 | 0.410868  | 0 | 0            | 0 | 0           |
| cov3_5_8_10_11 | 24.3915 | -464.901 | 0.4108792 | 0 | 0            | 0 | 0           |
| cov3_4_5_8_10  | 24.3918 | -464.901 | 0.4108399 | 0 | 0            | 0 | 0           |
| cov1_3_5_7_10  | 24.4016 | -464.906 | 0.4124659 | 0 | -0.052406649 | 0 | 0           |
| cov1_4_7_8_9   | 24.403  | -464.907 | 0.4066284 | 0 | -0.052459848 | 0 | 0           |
| cov3_5_6_10_11 | 24.403  | -464.907 | 0.4090329 | 0 | 0            | 0 | 0           |

|                |         |          |           |   |              |   |             |
|----------------|---------|----------|-----------|---|--------------|---|-------------|
| cov3_5_6_9_10  | 24.4168 | -464.914 | 0.4088532 | 0 | 0            | 0 | 0           |
| cov1_2_5_6_9   | 24.417  | -464.914 | 0.4081371 | 0 | -0.087846699 | 0 | 0.024676156 |
| cov2_3_5_6_10  | 24.4174 | -464.914 | 0.4088526 | 0 | 0            | 0 | 0.005412409 |
| cov3_4_5_6_10  | 24.4206 | -464.916 | 0.4091226 | 0 | 0            | 0 | 0           |
| cov1_3_8_9_11  | 24.4275 | -464.919 | 0.4137851 | 0 | -0.10881469  | 0 | 0           |
| cov1_3_5_8_9   | 24.4278 | -464.919 | 0.4125396 | 0 | -0.064314998 | 0 | 0           |
| cov1_2_3_8_9   | 24.4314 | -464.921 | 0.4135598 | 0 | -0.11167912  | 0 | 0.0193852   |
| cov1_3_4_8_9   | 24.4409 | -464.926 | 0.4125421 | 0 | -0.082100967 | 0 | 0           |
| cov3_5_6_8_9   | 24.4464 | -464.929 | 0.4093679 | 0 | 0            | 0 | 0           |
| cov1_2_3_7_10  | 24.4539 | -464.932 | 0.413911  | 0 | -0.11383599  | 0 | 0.021134224 |
| cov1_3_4_7_10  | 24.4655 | -464.938 | 0.4128201 | 0 | -0.081745159 | 0 | 0           |
| cov1_3_7_10_11 | 24.4781 | -464.945 | 0.4141339 | 0 | -0.1074596   | 0 | 0           |
| cov1_5_6_9_11  | 24.4921 | -464.951 | 0.4083133 | 0 | -0.075373533 | 0 | 0           |
| cov1_5_6_8_9   | 24.4951 | -464.953 | 0.4079589 | 0 | -0.070559623 | 0 | 0           |
| cov1_4_5_6_9   | 24.5013 | -464.956 | 0.4079015 | 0 | -0.070729246 | 0 | 0           |
| cov2_5_6_8_10  | 24.5034 | -464.957 | 0.4073902 | 0 | 0            | 0 | 0.009018615 |
| cov2_4_5_6_10  | 24.5036 | -464.957 | 0.4071817 | 0 | 0            | 0 | 0.013612571 |
| cov2_5_6_9_10  | 24.506  | -464.958 | 0.40746   | 0 | 0            | 0 | 0.008997269 |
| cov1_5_6_7_9   | 24.5082 | -464.96  | 0.4081183 | 0 | -0.069792252 | 0 | 0           |
| cov2_5_6_10_11 | 24.5083 | -464.96  | 0.4075131 | 0 | 0            | 0 | 0.009976255 |
| cov5_6_8_9_10  | 24.5114 | -464.961 | 0.4073829 | 0 | 0            | 0 | 0           |
| cov2_5_6_7_10  | 24.5122 | -464.962 | 0.4075615 | 0 | 0            | 0 | 0.009081917 |
| cov1_2_4_6_9   | 24.5131 | -464.962 | 0.4060158 | 0 | -0.16581487  | 0 | 0.07067664  |
| cov4_5_6_8_10  | 24.5169 | -464.964 | 0.4073824 | 0 | 0            | 0 | 0           |
| cov5_6_8_10_11 | 24.5176 | -464.964 | 0.4074858 | 0 | 0            | 0 | 0           |
| cov5_6_9_10_11 | 24.5191 | -464.965 | 0.4075363 | 0 | 0            | 0 | 0           |
| cov4_5_6_9_10  | 24.5202 | -464.966 | 0.4075115 | 0 | 0            | 0 | 0           |
| cov5_6_7_9_10  | 24.5204 | -464.966 | 0.4075546 | 0 | 0            | 0 | 0           |
| cov1_3_7_9_10  | 24.5207 | -464.966 | 0.4140371 | 0 | -0.096165255 | 0 | 0           |
| cov4_5_6_10_11 | 24.5251 | -464.968 | 0.4075951 | 0 | 0            | 0 | 0           |
| cov5_6_7_10_11 | 24.5253 | -464.968 | 0.407653  | 0 | 0            | 0 | 0           |
| cov4_5_6_7_10  | 24.5267 | -464.969 | 0.4076184 | 0 | 0            | 0 | 0           |
| cov1_3_4_6_10  | 24.538  | -464.974 | 0.4110073 | 0 | -0.14350591  | 0 | 0           |
| cov2_3_5_7_10  | 24.5384 | -464.975 | 0.4105067 | 0 | 0            | 0 | 0.009105292 |
| cov3_5_7_10_11 | 24.552  | -464.981 | 0.4107658 | 0 | 0            | 0 | 0           |
| cov3_5_7_9_10  | 24.5521 | -464.982 | 0.4107623 | 0 | 0            | 0 | 0           |
| cov3_4_5_7_10  | 24.553  | -464.982 | 0.4107802 | 0 | 0            | 0 | 0           |
| cov3_5_6_7_9   | 24.5552 | -464.983 | 0.4091509 | 0 | 0            | 0 | 0           |
| cov1_3_5_7_9   | 24.6409 | -465.026 | 0.4121594 | 0 | -0.054777602 | 0 | 0           |
| cov3_5_6_9_11  | 24.6461 | -465.029 | 0.4086314 | 0 | 0            | 0 | 0           |
| cov2_3_5_8_9   | 24.652  | -465.031 | 0.410335  | 0 | 0            | 0 | 0.004122132 |
| cov3_4_5_8_9   | 24.6529 | -465.032 | 0.4103092 | 0 | 0            | 0 | 0           |
| cov3_5_8_9_11  | 24.6535 | -465.032 | 0.4104241 | 0 | 0            | 0 | 0           |
| cov1_2_7_8_10  | 24.6578 | -465.034 | 0.4092936 | 0 | -0.1090798   | 0 | 0.0229469   |
| cov2_3_5_6_9   | 24.6591 | -465.035 | 0.4085078 | 0 | 0            | 0 | 0.002793048 |
| cov3_4_5_6_9   | 24.6603 | -465.036 | 0.4086089 | 0 | 0            | 0 | 0           |
| cov1_3_4_7_9   | 24.6835 | -465.047 | 0.4123797 | 0 | -0.080239555 | 0 | 0           |

|                |         |          |           |   |              |   |             |
|----------------|---------|----------|-----------|---|--------------|---|-------------|
| cov1_2_3_7_9   | 24.6838 | -465.047 | 0.4135241 | 0 | -0.11127437  | 0 | 0.019470597 |
| cov1_7_8_10_11 | 24.6881 | -465.05  | 0.4094323 | 0 | -0.10192953  | 0 | 0           |
| cov1_3_4_6_9   | 24.6883 | -465.05  | 0.4106174 | 0 | -0.14220798  | 0 | 0           |
| cov1_3_7_9_11  | 24.691  | -465.051 | 0.4137328 | 0 | -0.10710757  | 0 | 0           |
| cov1_2_3_6_10  | 24.6938 | -465.052 | 0.4132754 | 0 | -0.18252173  | 0 | 0.019158254 |
| cov1_2_3_5_10  | 24.7074 | -465.059 | 0.4102817 | 0 | -0.030159624 | 0 | 0.026624199 |
| cov2_4_5_6_9   | 24.7346 | -465.073 | 0.4068679 | 0 | 0            | 0 | 0.011267649 |
| cov1_7_8_9_10  | 24.7373 | -465.074 | 0.409309  | 0 | -0.089538707 | 0 | 0           |
| cov2_5_6_8_9   | 24.7375 | -465.074 | 0.4071361 | 0 | 0            | 0 | 0.00625721  |
| cov4_5_6_8_9   | 24.7413 | -465.076 | 0.4070002 | 0 | 0            | 0 | 0           |
| cov2_5_6_9_11  | 24.743  | -465.077 | 0.4072556 | 0 | 0            | 0 | 0.006923407 |
| cov5_6_8_9_11  | 24.7445 | -465.078 | 0.4071959 | 0 | 0            | 0 | 0           |
| cov2_5_6_7_9   | 24.7448 | -465.078 | 0.4073004 | 0 | 0            | 0 | 0.006328966 |
| cov1_3_6_10_11 | 24.7468 | -465.079 | 0.4132971 | 0 | -0.16487512  | 0 | 0           |
| cov2_3_4_5_10  | 24.7472 | -465.079 | 0.4090375 | 0 | 0            | 0 | 0.023711395 |
| cov1_3_6_9_10  | 24.749  | -465.08  | 0.4132928 | 0 | -0.16696381  | 0 | 0           |
| cov4_5_6_9_11  | 24.7496 | -465.08  | 0.4072151 | 0 | 0            | 0 | 0           |
| cov4_5_6_7_9   | 24.7505 | -465.081 | 0.4072352 | 0 | 0            | 0 | 0           |
| cov5_6_7_9_11  | 24.7511 | -465.081 | 0.4073617 | 0 | 0            | 0 | 0           |
| cov4_7_8_10_11 | 24.7513 | -465.081 | 0.4053075 | 0 | 0            | 0 | 0           |
| cov2_4_7_8_10  | 24.757  | -465.084 | 0.4041361 | 0 | 0            | 0 | 0.020326115 |
| cov2_3_5_9_10  | 24.7587 | -465.085 | 0.4096381 | 0 | 0            | 0 | 0.01822254  |
| cov2_3_5_10_11 | 24.7594 | -465.085 | 0.409678  | 0 | 0            | 0 | 0.018315992 |
| cov1_2_7_8_9   | 24.7731 | -465.092 | 0.4090867 | 0 | -0.1070964   | 0 | 0.021613608 |
| cov1_7_8_9_11  | 24.7895 | -465.1   | 0.4092107 | 0 | -0.10160651  | 0 | 0           |
| cov2_3_5_7_9   | 24.7965 | -465.104 | 0.4101427 | 0 | 0            | 0 | 0.006819633 |
| cov4_7_8_9_10  | 24.802  | -465.106 | 0.4048606 | 0 | 0            | 0 | 0           |
| cov3_5_7_9_11  | 24.8029 | -465.107 | 0.4103137 | 0 | 0            | 0 | 0           |
| cov3_4_5_7_9   | 24.8038 | -465.107 | 0.4102547 | 0 | 0            | 0 | 0           |
| cov4_6_7_8_10  | 24.8058 | -465.108 | 0.4052567 | 0 | 0            | 0 | 0           |
| cov1_3_5_10_11 | 24.8064 | -465.109 | 0.4104731 | 0 | -0.014580181 | 0 | 0           |
| cov1_3_4_5_10  | 24.8116 | -465.111 | 0.4106295 | 0 | -0.010409636 | 0 | 0           |
| cov1_3_5_9_10  | 24.8136 | -465.112 | 0.4104397 | 0 | -0.010463198 | 0 | 0           |
| cov3_4_5_10_11 | 24.8171 | -465.114 | 0.4103037 | 0 | 0            | 0 | 0           |
| cov3_4_5_9_10  | 24.8189 | -465.115 | 0.4103238 | 0 | 0            | 0 | 0           |
| cov3_5_9_10_11 | 24.8189 | -465.115 | 0.4100827 | 0 | 0            | 0 | 0           |
| cov1_2_4_5_10  | 24.8277 | -465.119 | 0.4068262 | 0 | -0.033197425 | 0 | 0.051240669 |
| cov1_2_3_6_9   | 24.8506 | -465.131 | 0.4129234 | 0 | -0.18008087  | 0 | 0.017674406 |
| cov1_2_3_4_10  | 24.8565 | -465.134 | 0.4088331 | 0 | -0.094541402 | 0 | 0.060529782 |
| cov2_4_5_8_10  | 24.8582 | -465.135 | 0.4065166 | 0 | 0            | 0 | 0.036975558 |
| cov4_7_8_9_11  | 24.8629 | -465.137 | 0.4049975 | 0 | 0            | 0 | 0           |
| cov2_4_7_8_9   | 24.8642 | -465.138 | 0.4038606 | 0 | 0            | 0 | 0.019145179 |
| cov1_4_6_8_10  | 24.8665 | -465.139 | 0.4073182 | 0 | -0.13140081  | 0 | 0           |
| cov2_4_5_10_11 | 24.8776 | -465.144 | 0.4070501 | 0 | 0            | 0 | 0.033538811 |
| cov2_4_5_7_10  | 24.8791 | -465.145 | 0.4067972 | 0 | 0            | 0 | 0.036120012 |
| cov2_4_5_9_10  | 24.8805 | -465.146 | 0.4068898 | 0 | 0            | 0 | 0.035766605 |
| cov1_3_6_9_11  | 24.897  | -465.154 | 0.4129407 | 0 | -0.16455648  | 0 | 0           |



|                |         |          |           |   |              |   |              |
|----------------|---------|----------|-----------|---|--------------|---|--------------|
| cov1_4_6_7_10  | 24.9061 | -465.158 | 0.4075305 | 0 | -0.13165787  | 0 | 0            |
| cov1_2_5_10_11 | 24.9073 | -465.159 | 0.4082697 | 0 | -0.019884757 | 0 | 0.027830371  |
| cov4_6_7_8_9   | 24.9094 | -465.16  | 0.4049275 | 0 | 0            | 0 | 0            |
| cov2_5_8_10_11 | 24.912  | -465.161 | 0.407785  | 0 | 0            | 0 | 0.021922828  |
| cov2_3_7_8_10  | 24.9166 | -465.164 | 0.4135104 | 0 | 0            | 0 | -0.068794851 |
| cov1_4_6_10_11 | 24.9235 | -465.167 | 0.4080395 | 0 | -0.13667001  | 0 | 0            |
| cov1_2_5_8_10  | 24.9268 | -465.169 | 0.4078957 | 0 | -0.012036909 | 0 | 0.029063843  |
| cov2_5_9_10_11 | 24.9276 | -465.169 | 0.4079762 | 0 | 0            | 0 | 0.022681181  |
| cov2_5_7_10_11 | 24.928  | -465.169 | 0.4079689 | 0 | 0            | 0 | 0.022524578  |
| cov1_2_3_5_9   | 24.9294 | -465.17  | 0.410066  | 0 | -0.032433008 | 0 | 0.024540299  |
| cov1_4_6_9_10  | 24.9322 | -465.172 | 0.4078199 | 0 | -0.13132073  | 0 | 0            |
| cov2_5_8_9_10  | 24.9351 | -465.173 | 0.4077391 | 0 | 0            | 0 | 0.025262995  |
| cov1_2_5_9_10  | 24.9364 | -465.174 | 0.4080536 | 0 | -0.011176589 | 0 | 0.028876163  |
| cov1_2_5_7_10  | 24.9367 | -465.174 | 0.4080781 | 0 | -0.011384159 | 0 | 0.028930649  |
| cov2_5_7_9_10  | 24.9441 | -465.178 | 0.4079247 | 0 | 0            | 0 | 0.025335666  |
| cov2_3_4_5_9   | 24.9747 | -465.193 | 0.4086846 | 0 | 0            | 0 | 0.021443049  |
| cov1_2_4_8_10  | 24.9845 | -465.198 | 0.4054003 | 0 | -0.089985394 | 0 | 0.076520885  |
| cov2_3_5_9_11  | 24.9889 | -465.2   | 0.4093699 | 0 | 0            | 0 | 0.015257834  |
| cov1_4_6_8_9   | 24.9904 | -465.201 | 0.4070633 | 0 | -0.13048851  | 0 | 0            |
| cov4_5_8_10_11 | 24.9969 | -465.204 | 0.4079257 | 0 | 0            | 0 | 0            |
| cov5_8_9_10_11 | 24.9981 | -465.205 | 0.4080501 | 0 | 0            | 0 | 0            |
| cov1_5_8_10_11 | 24.9988 | -465.205 | 0.4081478 | 0 | -0.003488737 | 0 | 0            |
| cov1_3_5_9_11  | 25.0084 | -465.21  | 0.4102198 | 0 | -0.019019059 | 0 | 0            |
| cov3_6_7_8_10  | 25.0128 | -465.212 | 0.4128603 | 0 | 0            | 0 | 0            |
| cov5_7_9_10_11 | 25.0191 | -465.215 | 0.4082427 | 0 | 0            | 0 | 0            |
| cov4_5_7_10_11 | 25.0194 | -465.215 | 0.4081834 | 0 | 0            | 0 | 0            |
| cov1_3_4_5_9   | 25.0196 | -465.215 | 0.4102812 | 0 | -0.014116101 | 0 | 0            |
| cov1_5_7_10_11 | 25.0204 | -465.216 | 0.4083103 | 0 | -0.001260128 | 0 | 0            |
| cov4_5_9_10_11 | 25.0215 | -465.216 | 0.4082748 | 0 | 0            | 0 | 0            |
| cov1_5_9_10_11 | 25.022  | -465.216 | 0.4083409 | 0 | 0.000233132  | 0 | 0            |
| cov1_4_5_10_11 | 25.0228 | -465.217 | 0.4083284 | 0 | -0.000286434 | 0 | 0            |
| cov1_4_6_7_9   | 25.0285 | -465.22  | 0.407275  | 0 | -0.13074396  | 0 | 0            |
| cov3_4_5_9_11  | 25.0305 | -465.221 | 0.4098231 | 0 | 0            | 0 | 0            |
| cov1_2_4_5_9   | 25.0311 | -465.221 | 0.4066077 | 0 | -0.036537886 | 0 | 0.050102217  |
| cov1_2_3_4_9   | 25.0336 | -465.222 | 0.4085934 | 0 | -0.09253304  | 0 | 0.057942105  |
| cov1_2_4_7_10  | 25.0354 | -465.223 | 0.4056535 | 0 | -0.090025606 | 0 | 0.075506337  |
| cov1_4_6_9_11  | 25.0399 | -465.225 | 0.4077808 | 0 | -0.13641317  | 0 | 0            |
| cov2_3_7_8_9   | 25.0486 | -465.23  | 0.412915  | 0 | 0            | 0 | -0.0676837   |
| cov1_4_5_8_10  | 25.0518 | -465.231 | 0.4078491 | 0 | 0.009621571  | 0 | 0            |
| cov1_5_8_9_10  | 25.0531 | -465.232 | 0.4079576 | 0 | 0.010511587  | 0 | 0            |
| cov4_5_8_9_10  | 25.0588 | -465.235 | 0.4079224 | 0 | 0            | 0 | 0            |
| cov1_4_5_9_10  | 25.0611 | -465.236 | 0.4080492 | 0 | 0.010729513  | 0 | 0            |
| cov1_5_7_9_10  | 25.0619 | -465.236 | 0.4081348 | 0 | 0.011063642  | 0 | 0            |
| cov1_4_5_7_10  | 25.0621 | -465.237 | 0.4080927 | 0 | 0.010429179  | 0 | 0            |
| cov1_2_4_10_11 | 25.0659 | -465.238 | 0.4063079 | 0 | -0.095690501 | 0 | 0.072082704  |
| cov4_5_7_9_10  | 25.0704 | -465.241 | 0.4081786 | 0 | 0            | 0 | 0            |
| cov2_4_5_8_9   | 25.0745 | -465.243 | 0.4062973 | 0 | 0            | 0 | 0.034124191  |

|                |         |          |           |   |              |   |              |
|----------------|---------|----------|-----------|---|--------------|---|--------------|
| cov1_2_4_9_10  | 25.0787 | -465.245 | 0.406136  | 0 | -0.089912631 | 0 | 0.073271278  |
| cov2_4_5_9_11  | 25.0899 | -465.25  | 0.406824  | 0 | 0            | 0 | 0.030365364  |
| cov2_4_5_7_9   | 25.094  | -465.252 | 0.4065796 | 0 | 0            | 0 | 0.03326829   |
| cov1_2_5_9_11  | 25.1118 | -465.261 | 0.408111  | 0 | -0.02324113  | 0 | 0.025595952  |
| cov2_5_8_9_11  | 25.1255 | -465.268 | 0.4075749 | 0 | 0            | 0 | 0.018766272  |
| cov1_2_5_8_9   | 25.1399 | -465.275 | 0.40774   | 0 | -0.014479034 | 0 | 0.026923097  |
| cov2_5_7_9_11  | 25.1405 | -465.276 | 0.4077582 | 0 | 0            | 0 | 0.019376797  |
| cov1_2_5_7_9   | 25.1485 | -465.28  | 0.4079169 | 0 | -0.013815137 | 0 | 0.026794628  |
| cov1_2_4_8_9   | 25.1525 | -465.282 | 0.4052903 | 0 | -0.088057125 | 0 | 0.073353483  |
| cov4_5_8_9_11  | 25.1849 | -465.298 | 0.4075942 | 0 | 0            | 0 | 0            |
| cov3_6_7_8_9   | 25.1856 | -465.298 | 0.4123581 | 0 | 0            | 0 | 0            |
| cov1_5_8_9_11  | 25.186  | -465.298 | 0.4079602 | 0 | -0.008101704 | 0 | 0            |
| cov1_2_4_7_9   | 25.201  | -465.306 | 0.405542  | 0 | -0.088112455 | 0 | 0.07236193   |
| cov3_4_8_10_11 | 25.2045 | -465.308 | 0.4095463 | 0 | 0            | 0 | 0            |
| cov4_5_7_9_11  | 25.2066 | -465.309 | 0.4078525 | 0 | 0            | 0 | 0            |
| cov1_5_7_9_11  | 25.2073 | -465.309 | 0.4081204 | 0 | -0.005871585 | 0 | 0            |
| cov1_4_5_9_11  | 25.2079 | -465.309 | 0.4080664 | 0 | -0.005128635 | 0 | 0            |
| cov1_3_4_10_11 | 25.2199 | -465.315 | 0.4111178 | 0 | -0.071223024 | 0 | 0            |
| cov1_2_4_9_11  | 25.2218 | -465.316 | 0.4061827 | 0 | -0.094711447 | 0 | 0.068953821  |
| cov1_3_4_9_10  | 25.2225 | -465.317 | 0.4110975 | 0 | -0.068518547 | 0 | 0            |
| cov3_7_8_10_11 | 25.2283 | -465.32  | 0.412639  | 0 | 0            | 0 | 0            |
| cov1_4_5_8_9   | 25.2441 | -465.328 | 0.4075794 | 0 | 0.005573374  | 0 | 0            |
| cov1_4_5_7_9   | 25.2542 | -465.333 | 0.4078216 | 0 | 0.006376527  | 0 | 0            |
| cov1_2_3_9_10  | 25.3111 | -465.361 | 0.4129991 | 0 | -0.10989472  | 0 | 0.021291155  |
| cov1_2_3_10_11 | 25.3113 | -465.361 | 0.4129771 | 0 | -0.11033416  | 0 | 0.021163129  |
| cov3_4_6_8_10  | 25.3162 | -465.364 | 0.409606  | 0 | 0            | 0 | 0            |
| cov1_3_4_9_11  | 25.3651 | -465.388 | 0.4107737 | 0 | -0.071331633 | 0 | 0            |
| cov1_2_6_8_10  | 25.3669 | -465.389 | 0.4101929 | 0 | -0.18437677  | 0 | 0.021328998  |
| cov3_4_8_9_10  | 25.3756 | -465.393 | 0.4085963 | 0 | 0            | 0 | 0            |
| cov1_3_9_10_11 | 25.3785 | -465.395 | 0.4130699 | 0 | -0.093483167 | 0 | 0            |
| cov1_2_6_10_11 | 25.3803 | -465.396 | 0.4106087 | 0 | -0.1878668   | 0 | 0.020368472  |
| cov2_3_4_8_10  | 25.384  | -465.397 | 0.4092605 | 0 | 0            | 0 | -0.008277264 |
| cov1_2_6_7_10  | 25.3888 | -465.4   | 0.41036   | 0 | -0.18385583  | 0 | 0.02119585   |
| cov1_2_6_9_10  | 25.394  | -465.402 | 0.4104633 | 0 | -0.18313986  | 0 | 0.02101802   |
| cov1_6_8_10_11 | 25.3992 | -465.405 | 0.4103035 | 0 | -0.17598082  | 0 | 0            |
| cov3_4_7_10_11 | 25.4019 | -465.406 | 0.4094475 | 0 | 0            | 0 | 0            |
| cov3_4_8_9_11  | 25.4028 | -465.407 | 0.4090216 | 0 | 0            | 0 | 0            |
| cov3_7_8_9_11  | 25.414  | -465.412 | 0.4120974 | 0 | 0            | 0 | 0            |
| cov1_6_7_10_11 | 25.4297 | -465.42  | 0.4104596 | 0 | -0.17438173  | 0 | 0            |
| cov1_6_8_9_10  | 25.4346 | -465.423 | 0.4101615 | 0 | -0.16695879  | 0 | 0            |
| cov1_6_9_10_11 | 25.4414 | -465.426 | 0.4105861 | 0 | -0.17207002  | 0 | 0            |
| cov1_6_7_9_10  | 25.4557 | -465.433 | 0.4103292 | 0 | -0.16653974  | 0 | 0            |
| cov1_2_3_9_11  | 25.4644 | -465.438 | 0.4126695 | 0 | -0.10931811  | 0 | 0.019637338  |
| cov1_2_6_8_9   | 25.4842 | -465.448 | 0.4099597 | 0 | -0.18207719  | 0 | 0.019926704  |
| cov1_2_6_9_11  | 25.4919 | -465.451 | 0.4103741 | 0 | -0.18618637  | 0 | 0.018910015  |
| cov3_4_6_8_9   | 25.499  | -465.455 | 0.4090578 | 0 | 0            | 0 | 0            |
| cov1_6_8_9_11  | 25.5032 | -465.457 | 0.4100605 | 0 | -0.17534849  | 0 | 0            |

|                |         |          |           |   |              |   |              |
|----------------|---------|----------|-----------|---|--------------|---|--------------|
| cov1_2_6_7_9   | 25.505  | -465.458 | 0.4101272 | 0 | -0.18156106  | 0 | 0.01980036   |
| cov3_4_6_7_10  | 25.5294 | -465.47  | 0.4094243 | 0 | 0            | 0 | 0            |
| cov1_6_7_9_11  | 25.5333 | -465.472 | 0.4102166 | 0 | -0.17375124  | 0 | 0            |
| cov1_4_8_10_11 | 25.5357 | -465.473 | 0.4075044 | 0 | -0.06781925  | 0 | 0            |
| cov2_3_4_8_9   | 25.5522 | -465.482 | 0.4087757 | 0 | 0            | 0 | -0.008477574 |
| cov3_4_7_9_10  | 25.5768 | -465.494 | 0.4084777 | 0 | 0            | 0 | 0            |
| cov1_4_7_10_11 | 25.5847 | -465.498 | 0.4077215 | 0 | -0.066797173 | 0 | 0            |
| cov2_3_4_7_10  | 25.5896 | -465.5   | 0.4089929 | 0 | 0            | 0 | -0.005825309 |
| cov3_4_7_9_11  | 25.5899 | -465.5   | 0.408928  | 0 | 0            | 0 | 0            |
| cov1_4_8_9_10  | 25.6082 | -465.51  | 0.4073203 | 0 | -0.052631344 | 0 | 0            |
| cov1_4_9_10_11 | 25.6185 | -465.515 | 0.4080368 | 0 | -0.06455243  | 0 | 0            |
| cov1_4_7_9_10  | 25.6425 | -465.527 | 0.4075509 | 0 | -0.053171056 | 0 | 0            |
| cov1_4_8_9_11  | 25.6497 | -465.53  | 0.4072852 | 0 | -0.067896852 | 0 | 0            |
| cov1_4_7_9_11  | 25.6979 | -465.554 | 0.4075033 | 0 | -0.066884045 | 0 | 0            |
| cov3_4_6_7_9   | 25.7007 | -465.556 | 0.408877  | 0 | 0            | 0 | 0            |
| cov2_3_4_7_9   | 25.7479 | -465.579 | 0.408508  | 0 | 0            | 0 | -0.005986921 |
| cov2_3_8_10_11 | 25.7735 | -465.592 | 0.4139939 | 0 | 0            | 0 | -0.049303197 |
| cov2_3_4_10_11 | 25.7799 | -465.595 | 0.4075427 | 0 | 0            | 0 | 0.021399144  |
| cov3_4_9_10_11 | 25.8273 | -465.619 | 0.408531  | 0 | 0            | 0 | 0            |
| cov3_4_6_10_11 | 25.8307 | -465.621 | 0.4085042 | 0 | 0            | 0 | 0            |
| cov2_3_6_8_10  | 25.837  | -465.624 | 0.4141639 | 0 | 0            | 0 | -0.046558794 |
| cov1_3_6_7_8   | 25.9166 | -465.664 | 0.4169193 | 0 | -0.17104272  | 0 | 0            |
| cov2_3_4_9_11  | 25.9314 | -465.671 | 0.4071962 | 0 | 0            | 0 | 0.019357739  |
| cov1_2_8_10_11 | 25.9437 | -465.677 | 0.4099738 | 0 | -0.1226582   | 0 | 0.021928255  |
| cov2_4_8_10_11 | 25.9476 | -465.679 | 0.4045334 | 0 | 0            | 0 | 0.03359306   |
| cov2_3_8_9_11  | 25.9529 | -465.682 | 0.4134825 | 0 | 0            | 0 | -0.049875681 |
| cov3_4_6_9_11  | 25.9721 | -465.692 | 0.4080468 | 0 | 0            | 0 | 0            |
| cov1_2_7_10_11 | 25.9742 | -465.693 | 0.410148  | 0 | -0.12092054  | 0 | 0.021950818  |
| cov2_4_7_10_11 | 25.9817 | -465.696 | 0.4047676 | 0 | 0            | 0 | 0.033358659  |
| cov2_4_9_10_11 | 25.9833 | -465.697 | 0.4048808 | 0 | 0            | 0 | 0.033239167  |
| cov1_2_9_10_11 | 25.984  | -465.697 | 0.410301  | 0 | -0.11916928  | 0 | 0.021958786  |
| cov2_4_6_10_11 | 25.9947 | -465.703 | 0.4050125 | 0 | 0            | 0 | 0.033002172  |
| cov2_3_4_6_10  | 25.9983 | -465.705 | 0.4075527 | 0 | 0            | 0 | 0.014017481  |
| cov1_2_8_9_10  | 26.0038 | -465.707 | 0.4098672 | 0 | -0.11035129  | 0 | 0.023426927  |
| cov2_3_7_10_11 | 26.0049 | -465.708 | 0.4139163 | 0 | 0            | 0 | -0.048205588 |
| cov2_3_6_8_9   | 26.0051 | -465.708 | 0.4136479 | 0 | 0            | 0 | -0.047150116 |
| cov3_4_6_9_10  | 26.0082 | -465.71  | 0.4080285 | 0 | 0            | 0 | 0            |
| cov1_8_9_10_11 | 26.0157 | -465.713 | 0.4100029 | 0 | -0.10510054  | 0 | 0            |
| cov3_6_8_10_11 | 26.0161 | -465.714 | 0.4136047 | 0 | 0            | 0 | 0            |
| cov1_2_7_9_10  | 26.0211 | -465.716 | 0.4100523 | 0 | -0.11004228  | 0 | 0.023274207  |
| cov2_3_8_9_10  | 26.0241 | -465.718 | 0.4141844 | 0 | 0            | 0 | -0.069031642 |
| cov2_3_4_9_10  | 26.0247 | -465.718 | 0.4070926 | 0 | 0            | 0 | 0.007305665  |
| cov1_3_5_7_8   | 26.0408 | -465.726 | 0.4176068 | 0 | -0.1599382   | 0 | 0            |
| cov1_7_9_10_11 | 26.0464 | -465.729 | 0.4101777 | 0 | -0.10334923  | 0 | 0            |
| cov2_4_6_8_10  | 26.0471 | -465.729 | 0.4047239 | 0 | 0            | 0 | 0.02770241   |
| cov1_2_8_9_11  | 26.0525 | -465.732 | 0.4097757 | 0 | -0.12131505  | 0 | 0.020550473  |
| cov2_4_8_9_10  | 26.0534 | -465.732 | 0.4044255 | 0 | 0            | 0 | 0.022191123  |

|                |         |          |           |   |             |   |              |
|----------------|---------|----------|-----------|---|-------------|---|--------------|
| cov2_4_8_9_11  | 26.0788 | -465.745 | 0.4043167 | 0 | 0           | 0 | 0.03108619   |
| cov2_6_7_8_10  | 26.0804 | -465.746 | 0.4094589 | 0 | 0           | 0 | -0.037272771 |
| cov1_3_7_8_11  | 26.0808 | -465.746 | 0.4167752 | 0 | -0.13834706 | 0 | 0            |
| cov4_8_9_10_11 | 26.0821 | -465.747 | 0.4056651 | 0 | 0           | 0 | 0            |
| cov1_2_7_9_11  | 26.0826 | -465.747 | 0.4099499 | 0 | -0.11958879 | 0 | 0.020579715  |
| cov4_6_8_10_11 | 26.0843 | -465.748 | 0.4056319 | 0 | 0           | 0 | 0            |
| cov2_3_6_7_10  | 26.0931 | -465.752 | 0.4140984 | 0 | 0           | 0 | -0.046533872 |
| cov2_4_6_7_10  | 26.0981 | -465.755 | 0.4049682 | 0 | 0           | 0 | 0.026731686  |
| cov2_7_8_10_11 | 26.1018 | -465.756 | 0.4094258 | 0 | 0           | 0 | -0.044237771 |
| cov2_4_7_9_10  | 26.1052 | -465.758 | 0.4046637 | 0 | 0           | 0 | 0.021144698  |
| cov1_2_3_7_8   | 26.1053 | -465.758 | 0.4166635 | 0 | -0.13812924 | 0 | 0.01562946   |
| cov2_4_7_9_11  | 26.1121 | -465.762 | 0.4045534 | 0 | 0           | 0 | 0.030859802  |
| cov4_6_9_10_11 | 26.1123 | -465.762 | 0.4058879 | 0 | 0           | 0 | 0            |
| cov4_7_9_10_11 | 26.1146 | -465.763 | 0.4058967 | 0 | 0           | 0 | 0            |
| cov4_6_7_10_11 | 26.1149 | -465.763 | 0.4058462 | 0 | 0           | 0 | 0            |
| cov2_3_4_6_9   | 26.122  | -465.766 | 0.4071647 | 0 | 0           | 0 | 0.012398902  |
| cov2_4_6_9_11  | 26.1241 | -465.768 | 0.4047789 | 0 | 0           | 0 | 0.030257058  |
| cov2_4_6_9_10  | 26.1245 | -465.768 | 0.4052602 | 0 | 0           | 0 | 0.024871153  |
| cov4_6_8_9_10  | 26.1273 | -465.769 | 0.405446  | 0 | 0           | 0 | 0            |
| cov1_3_4_7_8   | 26.142  | -465.776 | 0.4167113 | 0 | -0.12547924 | 0 | 0            |
| cov2_6_7_8_9   | 26.1457 | -465.778 | 0.4091371 | 0 | 0           | 0 | -0.03782251  |
| cov2_4_6_8_9   | 26.1636 | -465.787 | 0.4044626 | 0 | 0           | 0 | 0.025497417  |
| cov2_7_8_9_11  | 26.1687 | -465.79  | 0.4090863 | 0 | 0           | 0 | -0.044610825 |
| cov4_6_7_9_10  | 26.1719 | -465.791 | 0.4056596 | 0 | 0           | 0 | 0            |
| cov2_3_7_9_11  | 26.1749 | -465.793 | 0.4134091 | 0 | 0           | 0 | -0.048753288 |
| cov6_7_8_10_11 | 26.1816 | -465.796 | 0.4091947 | 0 | 0           | 0 | 0            |
| cov4_6_8_9_11  | 26.1948 | -465.803 | 0.4053103 | 0 | 0           | 0 | 0            |
| cov2_4_6_7_9   | 26.2126 | -465.812 | 0.4047055 | 0 | 0           | 0 | 0.024548166  |
| cov3_6_8_9_11  | 26.2202 | -465.816 | 0.4131278 | 0 | 0           | 0 | 0            |
| cov4_6_7_9_11  | 26.2248 | -465.818 | 0.4055278 | 0 | 0           | 0 | 0            |
| cov3_6_7_10_11 | 26.2478 | -465.829 | 0.4135351 | 0 | 0           | 0 | 0            |
| cov2_3_6_7_9   | 26.2503 | -465.831 | 0.4135878 | 0 | 0           | 0 | -0.04709191  |
| cov6_7_8_9_11  | 26.2695 | -465.84  | 0.4088986 | 0 | 0           | 0 | 0            |
| cov2_3_7_9_10  | 26.2728 | -465.842 | 0.4141099 | 0 | 0           | 0 | -0.068604552 |
| cov3_6_8_9_10  | 26.2826 | -465.847 | 0.4136476 | 0 | 0           | 0 | 0            |
| cov1_4_6_7_8   | 26.3001 | -465.856 | 0.4131282 | 0 | -0.15131181 | 0 | 0            |
| cov2_7_8_9_10  | 26.3221 | -465.867 | 0.4094837 | 0 | 0           | 0 | -0.06304758  |
| cov1_6_7_8_11  | 26.344  | -465.877 | 0.414018  | 0 | -0.17444239 | 0 | 0            |
| cov1_5_6_7_8   | 26.3485 | -465.88  | 0.4140038 | 0 | -0.14844717 | 0 | 0            |
| cov1_2_6_7_8   | 26.351  | -465.881 | 0.4139836 | 0 | -0.17754227 | 0 | 0.016161821  |
| cov6_7_8_9_10  | 26.36   | -465.885 | 0.4091419 | 0 | 0           | 0 | 0            |
| cov1_2_4_7_8   | 26.3702 | -465.891 | 0.412382  | 0 | -0.12609107 | 0 | 0.039691644  |
| cov3_8_9_10_11 | 26.4142 | -465.913 | 0.4133464 | 0 | 0           | 0 | 0            |
| cov3_6_7_9_11  | 26.4409 | -465.926 | 0.4130604 | 0 | 0           | 0 | 0            |
| cov1_4_7_8_11  | 26.4785 | -465.945 | 0.4129869 | 0 | -0.11786583 | 0 | 0            |
| cov1_5_7_8_11  | 26.5173 | -465.964 | 0.4138032 | 0 | -0.11505705 | 0 | 0            |
| cov1_2_7_8_11  | 26.5209 | -465.966 | 0.4137521 | 0 | -0.14422063 | 0 | 0.016192391  |

|                |         |          |           |   |             |   |              |
|----------------|---------|----------|-----------|---|-------------|---|--------------|
| cov1_2_5_7_8   | 26.5313 | -465.971 | 0.4137554 | 0 | -0.11593797 | 0 | 0.018254942  |
| cov3_6_7_9_10  | 26.5376 | -465.974 | 0.4135743 | 0 | 0           | 0 | 0            |
| cov1_4_5_7_8   | 26.5456 | -465.978 | 0.4129656 | 0 | -0.10199254 | 0 | 0            |
| cov2_3_6_10_11 | 26.5723 | -465.992 | 0.4129843 | 0 | 0           | 0 | -0.034217396 |
| cov2_3_9_10_11 | 26.599  | -466.005 | 0.412896  | 0 | 0           | 0 | -0.041126115 |
| cov7_8_9_10_11 | 26.6093 | -466.01  | 0.4090904 | 0 | 0           | 0 | 0            |
| cov3_7_9_10_11 | 26.6165 | -466.014 | 0.4132789 | 0 | 0           | 0 | 0            |
| cov2_3_6_9_11  | 26.697  | -466.054 | 0.412572  | 0 | 0           | 0 | -0.035350569 |
| cov1_3_5_6_8   | 26.7729 | -466.092 | 0.4189518 | 0 | -0.22608608 | 0 | 0            |
| cov3_6_9_10_11 | 26.7968 | -466.104 | 0.4126834 | 0 | 0           | 0 | 0            |
| cov2_3_6_9_10  | 26.8169 | -466.114 | 0.4129672 | 0 | 0           | 0 | -0.043510713 |
| cov1_3_6_8_11  | 26.8702 | -466.141 | 0.4179325 | 0 | -0.1940744  | 0 | 0            |
| cov1_2_3_6_8   | 26.8952 | -466.153 | 0.4178288 | 0 | -0.19464625 | 0 | 0.014078677  |
| cov1_3_4_6_8   | 26.925  | -466.168 | 0.4178423 | 0 | -0.183605   | 0 | 0            |
| cov1_3_5_6_7   | 26.9474 | -466.179 | 0.418609  | 0 | -0.2176706  | 0 | 0            |
| cov1_3_6_7_11  | 27.0027 | -466.207 | 0.4177683 | 0 | -0.1924432  | 0 | 0            |
| cov3_7_8_9_10  | 27.006  | -466.208 | 0.4124169 | 0 | 0           | 0 | 0            |
| cov1_2_3_6_7   | 27.0166 | -466.214 | 0.417676  | 0 | -0.19414386 | 0 | 0.014203851  |
| cov1_3_5_8_11  | 27.0353 | -466.223 | 0.4188225 | 0 | -0.1854009  | 0 | 0            |
| cov1_3_4_6_7   | 27.0465 | -466.229 | 0.4175604 | 0 | -0.18159041 | 0 | 0            |
| cov1_3_4_5_8   | 27.0637 | -466.237 | 0.4178236 | 0 | -0.17135873 | 0 | 0            |
| cov1_2_3_5_8   | 27.091  | -466.251 | 0.4186336 | 0 | -0.17958035 | 0 | 0.013472462  |
| cov1_2_3_4_6   | 27.1478 | -466.279 | 0.4154993 | 0 | -0.18558439 | 0 | 0.029541823  |
| cov1_2_3_8_11  | 27.1601 | -466.286 | 0.4176685 | 0 | -0.15335156 | 0 | 0.014223603  |
| cov1_3_4_8_11  | 27.1895 | -466.3   | 0.417813  | 0 | -0.14357609 | 0 | 0            |
| cov1_2_3_6_11  | 27.2095 | -466.31  | 0.4169014 | 0 | -0.19335626 | 0 | 0.014147877  |
| cov1_2_3_5_6   | 27.2199 | -466.315 | 0.4169037 | 0 | -0.18985005 | 0 | 0.01466928   |
| cov1_3_4_6_11  | 27.2231 | -466.317 | 0.4163145 | 0 | -0.17644609 | 0 | 0            |
| cov1_2_4_5_6   | 27.2246 | -466.318 | 0.4126273 | 0 | -0.20374643 | 0 | 0.049391771  |
| cov1_2_3_4_8   | 27.2254 | -466.318 | 0.417005  | 0 | -0.13785941 | 0 | 0.021285657  |
| cov1_3_4_5_6   | 27.2259 | -466.318 | 0.416198  | 0 | -0.17936046 | 0 | 0            |
| cov1_3_5_7_11  | 27.2331 | -466.322 | 0.4184389 | 0 | -0.17430556 | 0 | 0            |
| cov1_2_4_6_11  | 27.237  | -466.324 | 0.4135214 | 0 | -0.19017999 | 0 | 0.037739479  |
| cov1_3_5_6_11  | 27.2395 | -466.325 | 0.416886  | 0 | -0.18270189 | 0 | 0            |
| cov1_2_4_6_8   | 27.2532 | -466.332 | 0.4130718 | 0 | -0.18395714 | 0 | 0.04025898   |
| cov1_3_4_5_7   | 27.2577 | -466.334 | 0.4175283 | 0 | -0.16137307 | 0 | 0            |
| cov1_2_4_6_7   | 27.2667 | -466.339 | 0.4132685 | 0 | -0.18352331 | 0 | 0.039561774  |
| cov1_2_3_5_7   | 27.2728 | -466.342 | 0.4182607 | 0 | -0.17020686 | 0 | 0.014121607  |
| cov1_2_3_7_11  | 27.3006 | -466.356 | 0.4174882 | 0 | -0.15104866 | 0 | 0.014521246  |
| cov1_3_4_7_11  | 27.3322 | -466.372 | 0.4175031 | 0 | -0.13949086 | 0 | 0            |
| cov1_2_3_4_7   | 27.345  | -466.378 | 0.4166217 | 0 | -0.13601784 | 0 | 0.02353374   |
| cov1_4_6_8_11  | 27.3725 | -466.392 | 0.4136875 | 0 | -0.17365146 | 0 | 0            |
| cov1_4_6_7_11  | 27.3922 | -466.402 | 0.4138649 | 0 | -0.17241232 | 0 | 0            |
| cov1_4_5_6_11  | 27.3955 | -466.403 | 0.414003  | 0 | -0.17077006 | 0 | 0            |
| cov1_2_5_6_11  | 27.4102 | -466.411 | 0.4148552 | 0 | -0.18063343 | 0 | 0.015688739  |
| cov1_4_5_6_8   | 27.4341 | -466.423 | 0.413547  | 0 | -0.1629296  | 0 | 0            |
| cov2_6_7_10_11 | 27.4357 | -466.423 | 0.4101506 | 0 | 0           | 0 | -0.03538785  |

|                |         |          |           |   |             |   |              |
|----------------|---------|----------|-----------|---|-------------|---|--------------|
| cov2_6_9_10_11 | 27.4359 | -466.423 | 0.4098795 | 0 | 0           | 0 | -0.036076466 |
| cov1_5_6_8_11  | 27.4367 | -466.424 | 0.4146373 | 0 | -0.17148504 | 0 | 0            |
| cov1_2_3_4_5   | 27.4382 | -466.425 | 0.4147091 | 0 | -0.15375484 | 0 | 0.041051651  |
| cov1_4_5_6_7   | 27.4414 | -466.426 | 0.4137864 | 0 | -0.16169391 | 0 | 0            |
| cov2_6_8_10_11 | 27.4447 | -466.428 | 0.4099905 | 0 | 0           | 0 | -0.036005988 |
| cov1_2_6_8_11  | 27.4464 | -466.429 | 0.4146023 | 0 | -0.1994495  | 0 | 0.014978302  |
| cov1_5_6_7_11  | 27.447  | -466.429 | 0.4147919 | 0 | -0.16923249 | 0 | 0            |
| cov1_2_5_6_7   | 27.4508 | -466.431 | 0.4147596 | 0 | -0.17208849 | 0 | 0.016848267  |
| cov1_2_5_6_8   | 27.4521 | -466.432 | 0.4145957 | 0 | -0.17321176 | 0 | 0.01693832   |
| cov1_2_6_7_11  | 27.4594 | -466.435 | 0.4147548 | 0 | -0.19775803 | 0 | 0.015022629  |
| cov1_2_3_4_11  | 27.4703 | -466.441 | 0.4153098 | 0 | -0.13776662 | 0 | 0.029622906  |
| cov2_7_9_10_11 | 27.4867 | -466.449 | 0.410046  | 0 | 0           | 0 | -0.044780595 |
| cov2_8_9_10_11 | 27.5009 | -466.456 | 0.4098917 | 0 | 0           | 0 | -0.045806139 |
| cov2_6_7_9_11  | 27.5083 | -466.46  | 0.4098475 | 0 | 0           | 0 | -0.036300675 |
| cov2_6_8_9_11  | 27.5172 | -466.464 | 0.4096859 | 0 | 0           | 0 | -0.036915216 |
| cov2_5_6_7_8   | 27.518  | -466.464 | 0.4144653 | 0 | 0           | 0 | -0.022035236 |
| cov2_6_8_9_10  | 27.5256 | -466.468 | 0.40996   | 0 | 0           | 0 | -0.04189943  |
| cov2_6_7_9_10  | 27.5334 | -466.472 | 0.4101351 | 0 | 0           | 0 | -0.041818474 |
| cov1_2_3_5_11  | 27.5346 | -466.473 | 0.4165951 | 0 | -0.14106415 | 0 | 0.01564599   |
| cov1_2_4_8_11  | 27.5526 | -466.482 | 0.4128922 | 0 | -0.14011265 | 0 | 0.039673717  |
| cov1_2_4_5_11  | 27.5546 | -466.483 | 0.4126474 | 0 | -0.15267116 | 0 | 0.047038654  |
| cov1_3_4_5_11  | 27.5547 | -466.483 | 0.4160657 | 0 | -0.12889634 | 0 | 0            |
| cov2_5_7_8_11  | 27.5749 | -466.493 | 0.4146393 | 0 | 0           | 0 | -0.027530796 |
| cov5_6_7_8_11  | 27.5755 | -466.493 | 0.4145099 | 0 | 0           | 0 | 0            |
| cov1_2_4_5_8   | 27.5772 | -466.494 | 0.4118852 | 0 | -0.14826146 | 0 | 0.05313671   |
| cov1_2_4_7_11  | 27.5773 | -466.494 | 0.4130868 | 0 | -0.1384898  | 0 | 0.039130546  |
| cov4_5_6_7_8   | 27.5945 | -466.503 | 0.4141853 | 0 | 0           | 0 | 0            |
| cov1_2_4_5_7   | 27.5983 | -466.505 | 0.412192  | 0 | -0.1455211  | 0 | 0.051070376  |
| cov2_4_5_7_8   | 27.6    | -466.505 | 0.4153958 | 0 | 0           | 0 | -0.038884385 |
| cov3_5_6_7_8   | 27.6056 | -466.508 | 0.4148608 | 0 | 0           | 0 | 0            |
| cov2_3_5_7_8   | 27.6242 | -466.518 | 0.4148775 | 0 | 0           | 0 | -0.033623222 |
| cov6_7_9_10_11 | 27.6713 | -466.541 | 0.4098789 | 0 | 0           | 0 | 0            |
| cov6_8_9_10_11 | 27.6887 | -466.55  | 0.4097114 | 0 | 0           | 0 | 0            |
| cov4_5_7_8_11  | 27.7171 | -466.564 | 0.4145329 | 0 | 0           | 0 | 0            |
| cov3_5_7_8_11  | 27.7227 | -466.567 | 0.4145232 | 0 | 0           | 0 | 0            |
| cov1_4_5_8_11  | 27.7273 | -466.569 | 0.4134417 | 0 | -0.11880941 | 0 | 0            |
| cov1_2_5_8_11  | 27.7318 | -466.571 | 0.4143318 | 0 | -0.13038328 | 0 | 0.017141059  |
| cov1_2_5_7_11  | 27.7418 | -466.576 | 0.4144996 | 0 | -0.12804463 | 0 | 0.017208482  |
| cov1_4_5_7_11  | 27.7464 | -466.579 | 0.4136925 | 0 | -0.11626084 | 0 | 0            |
| cov3_4_5_7_8   | 27.8247 | -466.618 | 0.41383   | 0 | 0           | 0 | 0            |
| cov4_6_7_8_11  | 27.9394 | -466.675 | 0.4123286 | 0 | 0           | 0 | 0            |
| cov3_4_6_7_8   | 27.9523 | -466.682 | 0.4138653 | 0 | 0           | 0 | 0            |
| cov2_3_6_7_8   | 27.985  | -466.698 | 0.4168441 | 0 | 0           | 0 | -0.047597504 |
| cov2_4_6_7_8   | 27.9948 | -466.703 | 0.4125618 | 0 | 0           | 0 | -0.013686135 |
| cov3_6_7_8_11  | 28.2578 | -466.834 | 0.4166673 | 0 | 0           | 0 | 0            |
| cov2_6_7_8_11  | 28.2784 | -466.845 | 0.4140766 | 0 | 0           | 0 | -0.039488312 |
| cov2_4_7_8_11  | 28.3136 | -466.862 | 0.4126739 | 0 | 0           | 0 | -0.029802501 |

|                  |         |          |           |   |              |   |              |
|------------------|---------|----------|-----------|---|--------------|---|--------------|
| cov3_4_7_8_11    | 28.4405 | -466.926 | 0.4126247 | 0 | 0            | 0 | 0            |
| cov2_3_7_8_11    | 28.4499 | -466.93  | 0.4170693 | 0 | 0            | 0 | -0.071757707 |
| cov2_3_4_7_8     | 28.6138 | -467.012 | 0.4144635 | 0 | 0            | 0 | -0.060512861 |
| cov2_3_5_6_11    | 28.7951 | -467.103 | 0.4159133 | 0 | 0            | 0 | -0.025713729 |
| cov2_3_5_6_8     | 28.803  | -467.107 | 0.4161913 | 0 | 0            | 0 | -0.029626983 |
| cov2_3_4_5_6     | 28.8066 | -467.109 | 0.4164514 | 0 | 0            | 0 | -0.033439005 |
| cov2_5_6_7_11    | 28.8113 | -467.111 | 0.4151532 | 0 | 0            | 0 | -0.022506765 |
| cov2_3_5_6_7     | 28.8182 | -467.115 | 0.4158099 | 0 | 0            | 0 | -0.027125314 |
| cov2_4_5_6_7     | 28.8243 | -467.118 | 0.4155608 | 0 | 0            | 0 | -0.028621186 |
| cov2_3_4_5_11    | 28.8264 | -467.119 | 0.4166061 | 0 | 0            | 0 | -0.038262528 |
| cov2_4_5_7_11    | 28.8293 | -467.12  | 0.4156903 | 0 | 0            | 0 | -0.031471403 |
| cov2_3_5_7_11    | 28.8345 | -467.123 | 0.4156543 | 0 | 0            | 0 | -0.029084976 |
| cov2_5_6_8_11    | 28.8387 | -467.125 | 0.4149995 | 0 | 0            | 0 | -0.023119611 |
| cov2_3_5_8_11    | 28.8427 | -467.127 | 0.415995  | 0 | 0            | 0 | -0.032586112 |
| cov2_4_5_6_11    | 28.8456 | -467.128 | 0.4149565 | 0 | 0            | 0 | -0.024971703 |
| cov2_4_5_6_8     | 28.8483 | -467.13  | 0.4153017 | 0 | 0            | 0 | -0.02777241  |
| cov2_3_4_5_7     | 28.8561 | -467.133 | 0.4164682 | 0 | 0            | 0 | -0.040996451 |
| cov2_3_4_5_8     | 28.8607 | -467.136 | 0.4168702 | 0 | 0            | 0 | -0.045042562 |
| cov2_4_5_8_11    | 28.863  | -467.137 | 0.415488  | 0 | 0            | 0 | -0.031705168 |
| cov4_5_6_7_11    | 28.8871 | -467.149 | 0.4148369 | 0 | 0            | 0 | 0            |
| cov3_4_5_6_11    | 28.8943 | -467.153 | 0.4152819 | 0 | 0            | 0 | 0            |
| cov3_5_6_7_11    | 28.8986 | -467.155 | 0.4155305 | 0 | 0            | 0 | 0            |
| cov3_5_6_8_11    | 28.9103 | -467.161 | 0.4158832 | 0 | 0            | 0 | 0            |
| cov4_5_6_8_11    | 28.9143 | -467.163 | 0.4146108 | 0 | 0            | 0 | 0            |
| cov3_4_5_6_7     | 28.9299 | -467.17  | 0.4150178 | 0 | 0            | 0 | 0            |
| cov3_4_5_6_8     | 28.9348 | -467.173 | 0.41531   | 0 | 0            | 0 | 0            |
| cov3_4_5_7_11    | 28.9703 | -467.191 | 0.4147559 | 0 | 0            | 0 | 0            |
| cov3_4_5_8_11    | 29.0125 | -467.212 | 0.4149889 | 0 | 0            | 0 | 0            |
| cov2_3_4_6_8     | 29.1955 | -467.303 | 0.4160363 | 0 | 0            | 0 | -0.031967361 |
| cov3_4_6_8_11    | 29.2016 | -467.306 | 0.4149001 | 0 | 0            | 0 | 0            |
| cov2_3_4_6_11    | 29.2142 | -467.313 | 0.4149606 | 0 | 0            | 0 | -0.019873854 |
| cov2_3_6_8_11    | 29.2229 | -467.317 | 0.4177656 | 0 | 0            | 0 | -0.04717776  |
| cov3_4_6_7_11    | 29.2493 | -467.33  | 0.4145701 | 0 | 0            | 0 | 0            |
| cov2_3_4_6_7     | 29.2746 | -467.343 | 0.4155934 | 0 | 0            | 0 | -0.029119709 |
| cov2_4_6_7_11    | 29.3122 | -467.362 | 0.4131153 | 0 | 0            | 0 | -0.011115469 |
| cov2_3_6_7_11    | 29.3139 | -467.362 | 0.4175471 | 0 | 0            | 0 | -0.046278112 |
| cov2_4_6_8_11    | 29.3244 | -467.368 | 0.412925  | 0 | 0            | 0 | -0.011005649 |
| cov2_3_4_8_11    | 29.4875 | -467.449 | 0.4155456 | 0 | 0            | 0 | -0.044080003 |
| cov2_3_4_7_11    | 29.5221 | -467.467 | 0.4151172 | 0 | 0            | 0 | -0.040155551 |
| cov1_3_6_7_8_10  | 29.6748 | -464.028 | 0.4135678 | 0 | -0.16494809  | 0 | 0            |
| cov1_3_6_7_8_9   | 29.9041 | -464.143 | 0.4131154 | 0 | -0.16303599  | 0 | 0            |
| cov3_5_6_7_8_10  | 30.055  | -464.218 | 0.4090904 | 0 | 0            | 0 | 0            |
| cov1_3_5_7_8_10  | 30.0813 | -464.232 | 0.4116584 | 0 | -0.051160314 | 0 | 0            |
| cov1_2_3_7_8_10  | 30.1386 | -464.26  | 0.4131302 | 0 | -0.11288158  | 0 | 0.020831992  |
| cov1_3_4_7_8_10  | 30.1486 | -464.265 | 0.4120401 | 0 | -0.081086843 | 0 | 0            |
| cov1_5_6_7_8_10  | 30.1662 | -464.274 | 0.4076022 | 0 | -0.055700373 | 0 | 0            |
| cov1_3_7_8_10_11 | 30.1669 | -464.274 | 0.4133418 | 0 | -0.10593033  | 0 | 0            |

|                  |         |          |           |   |              |   |             |
|------------------|---------|----------|-----------|---|--------------|---|-------------|
| cov1_3_7_8_9_10  | 30.2038 | -464.293 | 0.4132463 | 0 | -0.095421907 | 0 | 0           |
| cov2_3_5_7_8_10  | 30.2109 | -464.296 | 0.4097325 | 0 | 0            | 0 | 0.009149402 |
| cov3_5_7_8_9_10  | 30.2246 | -464.303 | 0.4099833 | 0 | 0            | 0 | 0           |
| cov3_5_7_8_10_11 | 30.2253 | -464.304 | 0.4100038 | 0 | 0            | 0 | 0           |
| cov3_4_5_7_8_10  | 30.2257 | -464.304 | 0.4100173 | 0 | 0            | 0 | 0           |
| cov2_5_6_7_8_10  | 30.2978 | -464.34  | 0.406894  | 0 | 0            | 0 | 0.011366452 |
| cov5_6_7_8_9_10  | 30.3147 | -464.348 | 0.4069147 | 0 | 0            | 0 | 0           |
| cov3_5_6_7_8_9   | 30.3172 | -464.35  | 0.4086253 | 0 | 0            | 0 | 0           |
| cov5_6_7_8_10_11 | 30.3205 | -464.351 | 0.4070151 | 0 | 0            | 0 | 0           |
| cov4_5_6_7_8_10  | 30.3206 | -464.351 | 0.4069753 | 0 | 0            | 0 | 0           |
| cov1_3_5_7_8_9   | 30.3224 | -464.352 | 0.4113404 | 0 | -0.053460106 | 0 | 0           |
| cov1_3_4_7_8_9   | 30.3682 | -464.375 | 0.4115877 | 0 | -0.079521654 | 0 | 0           |
| cov1_5_6_7_8_9   | 30.3695 | -464.376 | 0.4073721 | 0 | -0.058905263 | 0 | 0           |
| cov1_2_3_7_8_9   | 30.3701 | -464.376 | 0.4127335 | 0 | -0.11025657  | 0 | 0.019150093 |
| cov1_3_7_8_9_11  | 30.3819 | -464.382 | 0.4129307 | 0 | -0.10554634  | 0 | 0           |
| cov2_3_5_7_8_9   | 30.4703 | -464.426 | 0.4093604 | 0 | 0            | 0 | 0.006861037 |
| cov1_3_5_6_8_10  | 30.4715 | -464.427 | 0.4129464 | 0 | -0.1370573   | 0 | 0           |
| cov3_5_7_8_9_11  | 30.4776 | -464.43  | 0.4095435 | 0 | 0            | 0 | 0           |
| cov3_4_5_7_8_9   | 30.4779 | -464.43  | 0.4094826 | 0 | 0            | 0 | 0           |
| cov1_3_4_6_8_10  | 30.5036 | -464.443 | 0.4129736 | 0 | -0.16169886  | 0 | 0           |
| cov1_2_3_6_8_10  | 30.5252 | -464.454 | 0.4143209 | 0 | -0.19163611  | 0 | 0.018873274 |
| cov2_5_6_7_8_9   | 30.5292 | -464.456 | 0.4066335 | 0 | 0            | 0 | 0.008629467 |
| cov4_5_6_7_8_9   | 30.541  | -464.461 | 0.4065941 | 0 | 0            | 0 | 0           |
| cov5_6_7_8_9_11  | 30.5424 | -464.462 | 0.4067235 | 0 | 0            | 0 | 0           |
| cov2_4_5_7_8_10  | 30.5481 | -464.465 | 0.4060675 | 0 | 0            | 0 | 0.035850811 |
| cov1_3_6_8_10_11 | 30.5562 | -464.469 | 0.4144844 | 0 | -0.18338952  | 0 | 0           |
| cov1_3_6_8_9_10  | 30.579  | -464.48  | 0.4143785 | 0 | -0.17641321  | 0 | 0           |
| cov2_5_7_8_10_11 | 30.5976 | -464.49  | 0.4072135 | 0 | 0            | 0 | 0.02268625  |
| cov1_2_5_7_8_10  | 30.6046 | -464.493 | 0.4073151 | 0 | -0.010615873 | 0 | 0.028602156 |
| cov2_5_7_8_9_10  | 30.6107 | -464.496 | 0.4071642 | 0 | 0            | 0 | 0.025256228 |
| cov1_3_5_6_7_10  | 30.678  | -464.53  | 0.4126136 | 0 | -0.12928006  | 0 | 0           |
| cov5_7_8_9_10_11 | 30.6899 | -464.536 | 0.4074845 | 0 | 0            | 0 | 0           |
| cov4_5_7_8_10_11 | 30.6907 | -464.536 | 0.4074368 | 0 | 0            | 0 | 0           |
| cov1_5_7_8_10_11 | 30.6916 | -464.537 | 0.4075352 | 0 | 0.000146316  | 0 | 0           |
| cov1_2_4_7_8_10  | 30.7137 | -464.548 | 0.404936  | 0 | -0.089235794 | 0 | 0.074816774 |
| cov1_5_7_8_9_10  | 30.7267 | -464.554 | 0.4073609 | 0 | 0.011633704  | 0 | 0           |
| cov1_4_5_7_8_10  | 30.7275 | -464.555 | 0.4073382 | 0 | 0.010993558  | 0 | 0           |
| cov1_3_5_6_8_9   | 30.7304 | -464.556 | 0.4126003 | 0 | -0.13869804  | 0 | 0           |
| cov4_5_7_8_9_10  | 30.7366 | -464.559 | 0.407424  | 0 | 0            | 0 | 0           |
| cov1_3_4_6_8_9   | 30.7411 | -464.561 | 0.4124812 | 0 | -0.15950949  | 0 | 0           |
| cov1_3_4_6_7_10  | 30.7441 | -464.563 | 0.4128311 | 0 | -0.16079987  | 0 | 0           |
| cov2_4_5_7_8_9   | 30.7642 | -464.573 | 0.4058381 | 0 | 0            | 0 | 0.033005157 |
| cov1_4_6_7_8_10  | 30.7675 | -464.575 | 0.4068406 | 0 | -0.12055507  | 0 | 0           |
| cov1_2_3_6_8_9   | 30.7749 | -464.578 | 0.4138827 | 0 | -0.18832701  | 0 | 0.017089371 |
| cov1_2_3_6_7_10  | 30.7777 | -464.58  | 0.4142931 | 0 | -0.19196052  | 0 | 0.018901941 |
| cov1_3_6_8_9_11  | 30.7906 | -464.586 | 0.4140446 | 0 | -0.18234031  | 0 | 0           |
| cov2_5_7_8_9_11  | 30.8118 | -464.597 | 0.4069959 | 0 | 0            | 0 | 0.01952335  |



|                  |         |          |           |   |              |   |              |
|------------------|---------|----------|-----------|---|--------------|---|--------------|
| cov1_3_6_7_10_11 | 30.8146 | -464.598 | 0.4144466 | 0 | -0.18277112  | 0 | 0            |
| cov1_2_5_7_8_9   | 30.8182 | -464.6   | 0.4071462 | 0 | -0.012991321 | 0 | 0.026441868  |
| cov1_3_6_7_9_10  | 30.8316 | -464.607 | 0.4143549 | 0 | -0.17670681  | 0 | 0            |
| cov4_5_7_8_9_11  | 30.8793 | -464.631 | 0.4070986 | 0 | 0            | 0 | 0            |
| cov1_2_4_7_8_9   | 30.8806 | -464.631 | 0.4048146 | 0 | -0.087260051 | 0 | 0.071649428  |
| cov1_5_7_8_9_11  | 30.8807 | -464.631 | 0.4073384 | 0 | -0.004460245 | 0 | 0            |
| cov1_4_6_7_8_9   | 30.8906 | -464.636 | 0.406581  | 0 | -0.11963562  | 0 | 0            |
| cov1_4_5_7_8_9   | 30.9215 | -464.652 | 0.4070576 | 0 | 0.006966786  | 0 | 0            |
| cov1_3_5_6_7_9   | 30.9293 | -464.656 | 0.4122585 | 0 | -0.13076196  | 0 | 0            |
| cov1_3_4_6_7_9   | 30.9705 | -464.676 | 0.4123365 | 0 | -0.15856323  | 0 | 0            |
| cov1_2_3_4_8_10  | 31.011  | -464.696 | 0.4110486 | 0 | -0.1033568   | 0 | 0.048294965  |
| cov1_2_3_6_7_9   | 31.0163 | -464.699 | 0.4138614 | 0 | -0.18864557  | 0 | 0.017151445  |
| cov1_2_3_5_6_10  | 31.0246 | -464.703 | 0.4103928 | 0 | -0.10227842  | 0 | 0.024798608  |
| cov1_3_6_7_9_11  | 31.039  | -464.71  | 0.4140036 | 0 | -0.18166826  | 0 | 0            |
| cov3_4_7_8_10_11 | 31.0617 | -464.722 | 0.4087131 | 0 | 0            | 0 | 0            |
| cov1_2_4_5_6_10  | 31.1023 | -464.742 | 0.4069542 | 0 | -0.11000683  | 0 | 0.050679949  |
| cov1_3_5_6_9_10  | 31.115  | -464.748 | 0.4104629 | 0 | -0.084436644 | 0 | 0            |
| cov1_3_4_5_6_10  | 31.1168 | -464.749 | 0.4105674 | 0 | -0.084708322 | 0 | 0            |
| cov1_3_5_6_10_11 | 31.1169 | -464.749 | 0.4105302 | 0 | -0.08494144  | 0 | 0            |
| cov1_2_3_5_8_10  | 31.1268 | -464.754 | 0.4126149 | 0 | -0.078131392 | 0 | 0.023509403  |
| cov3_4_6_7_8_10  | 31.1519 | -464.767 | 0.4088984 | 0 | 0            | 0 | 0            |
| cov1_3_5_8_10_11 | 31.1589 | -464.77  | 0.4130024 | 0 | -0.074749904 | 0 | 0            |
| cov1_2_3_8_10_11 | 31.174  | -464.778 | 0.4140865 | 0 | -0.12491201  | 0 | 0.019803881  |
| cov1_2_3_4_6_10  | 31.1846 | -464.783 | 0.4086876 | 0 | -0.17085012  | 0 | 0.061856526  |
| cov1_3_4_8_10_11 | 31.1853 | -464.784 | 0.4131148 | 0 | -0.096271286 | 0 | 0            |
| cov3_5_6_8_10_11 | 31.1889 | -464.785 | 0.409876  | 0 | 0            | 0 | 0            |
| cov3_5_6_8_9_10  | 31.1973 | -464.79  | 0.4097353 | 0 | 0            | 0 | 0            |
| cov2_3_5_6_8_10  | 31.2015 | -464.792 | 0.4098786 | 0 | 0            | 0 | -0.001870535 |
| cov3_4_5_6_8_10  | 31.2019 | -464.792 | 0.4097978 | 0 | 0            | 0 | 0            |
| cov1_3_4_5_8_10  | 31.2049 | -464.793 | 0.4126327 | 0 | -0.062770799 | 0 | 0            |
| cov1_3_5_8_9_10  | 31.2093 | -464.796 | 0.4128639 | 0 | -0.062014972 | 0 | 0            |
| cov1_2_5_6_8_10  | 31.2096 | -464.796 | 0.408123  | 0 | -0.087237991 | 0 | 0.027084412  |
| cov1_2_3_8_9_10  | 31.2172 | -464.8   | 0.4140015 | 0 | -0.1146789   | 0 | 0.021198191  |
| cov1_2_5_6_10_11 | 31.2189 | -464.8   | 0.4084515 | 0 | -0.089520381 | 0 | 0.0263893    |
| cov1_2_5_6_9_10  | 31.2241 | -464.803 | 0.4082884 | 0 | -0.085589688 | 0 | 0.026783239  |
| cov1_2_5_6_7_10  | 31.2247 | -464.803 | 0.4082834 | 0 | -0.086408356 | 0 | 0.026970036  |
| cov1_2_6_7_8_10  | 31.2323 | -464.807 | 0.4096007 | 0 | -0.17206848  | 0 | 0.021202313  |
| cov1_3_8_9_10_11 | 31.2324 | -464.807 | 0.4142206 | 0 | -0.10929325  | 0 | 0            |
| cov1_3_4_8_9_10  | 31.2398 | -464.811 | 0.4130127 | 0 | -0.08379826  | 0 | 0            |
| cov3_4_7_8_9_10  | 31.2422 | -464.812 | 0.4077245 | 0 | 0            | 0 | 0            |
| cov1_2_3_4_7_10  | 31.2485 | -464.815 | 0.4108078 | 0 | -0.10219867  | 0 | 0.050050849  |
| cov3_4_7_8_9_11  | 31.2511 | -464.816 | 0.4081842 | 0 | 0            | 0 | 0            |
| cov1_2_3_5_6_9   | 31.2547 | -464.818 | 0.4101312 | 0 | -0.1038646   | 0 | 0.02260549   |
| cov1_2_4_6_8_10  | 31.2558 | -464.819 | 0.4053462 | 0 | -0.16961863  | 0 | 0.077410788  |
| cov2_3_4_7_8_10  | 31.2561 | -464.819 | 0.4082473 | 0 | 0            | 0 | -0.005869011 |
| cov1_4_7_8_10_11 | 31.2599 | -464.821 | 0.4069691 | 0 | -0.06550287  | 0 | 0            |
| cov1_2_3_4_8_9   | 31.2633 | -464.823 | 0.4107128 | 0 | -0.1008126   | 0 | 0.045828492  |

|                  |         |          |           |   |              |   |             |
|------------------|---------|----------|-----------|---|--------------|---|-------------|
| cov1_6_7_8_10_11 | 31.2744 | -464.828 | 0.4096967 | 0 | -0.16242505  | 0 | 0           |
| cov1_5_6_8_10_11 | 31.2972 | -464.84  | 0.4082942 | 0 | -0.074885966 | 0 | 0           |
| cov1_6_7_8_9_10  | 31.2992 | -464.841 | 0.4095685 | 0 | -0.15473739  | 0 | 0           |
| cov3_5_6_7_10_11 | 31.3061 | -464.844 | 0.4096661 | 0 | 0            | 0 | 0           |
| cov1_4_7_8_9_10  | 31.3103 | -464.846 | 0.4067975 | 0 | -0.05266177  | 0 | 0           |
| cov1_2_4_6_7_10  | 31.3107 | -464.846 | 0.4055802 | 0 | -0.16949012  | 0 | 0.076486151 |
| cov1_4_5_6_8_10  | 31.3125 | -464.847 | 0.4078816 | 0 | -0.068730028 | 0 | 0           |
| cov1_2_4_5_6_9   | 31.3129 | -464.847 | 0.4066907 | 0 | -0.1126523   | 0 | 0.049341573 |
| cov3_5_6_7_9_10  | 31.316  | -464.849 | 0.4095185 | 0 | 0            | 0 | 0           |
| cov1_5_6_8_9_10  | 31.3168 | -464.849 | 0.4081048 | 0 | -0.066927812 | 0 | 0           |
| cov1_5_6_7_10_11 | 31.3187 | -464.85  | 0.4084378 | 0 | -0.072847654 | 0 | 0           |
| cov1_5_6_9_10_11 | 31.3196 | -464.851 | 0.4084518 | 0 | -0.070928548 | 0 | 0           |
| cov1_4_5_6_10_11 | 31.3199 | -464.851 | 0.4083619 | 0 | -0.072032723 | 0 | 0           |
| cov2_3_5_6_7_10  | 31.321  | -464.851 | 0.4096157 | 0 | 0            | 0 | 8.32E-05    |
| cov3_4_5_6_7_10  | 31.321  | -464.851 | 0.4096335 | 0 | 0            | 0 | 0           |
| cov3_4_6_7_8_9   | 31.3277 | -464.855 | 0.408355  | 0 | 0            | 0 | 0           |
| cov1_4_5_6_9_10  | 31.3283 | -464.855 | 0.4081362 | 0 | -0.066737625 | 0 | 0           |
| cov1_4_5_6_7_10  | 31.3296 | -464.856 | 0.408113  | 0 | -0.06772023  | 0 | 0           |
| cov1_3_5_6_9_11  | 31.3308 | -464.856 | 0.4102413 | 0 | -0.088737432 | 0 | 0           |
| cov1_5_6_7_9_10  | 31.331  | -464.856 | 0.4082656 | 0 | -0.06617552  | 0 | 0           |
| cov1_3_4_5_6_9   | 31.3311 | -464.856 | 0.4101631 | 0 | -0.087892411 | 0 | 0           |
| cov1_2_3_5_7_10  | 31.3437 | -464.863 | 0.412239  | 0 | -0.069150229 | 0 | 0.024120313 |
| cov1_2_6_7_8_9   | 31.3494 | -464.866 | 0.4093637 | 0 | -0.16975121  | 0 | 0.019789677 |
| cov1_2_3_4_6_9   | 31.3659 | -464.874 | 0.4084038 | 0 | -0.16833632  | 0 | 0.059193477 |
| cov1_4_7_8_9_11  | 31.3746 | -464.878 | 0.4067415 | 0 | -0.065554508 | 0 | 0           |
| cov1_2_4_6_9_10  | 31.3754 | -464.879 | 0.4061358 | 0 | -0.16789206  | 0 | 0.073665322 |
| cov1_2_4_6_10_11 | 31.3766 | -464.879 | 0.4062298 | 0 | -0.16920012  | 0 | 0.073487369 |
| cov1_6_7_8_9_11  | 31.3789 | -464.88  | 0.4094493 | 0 | -0.16179138  | 0 | 0           |
| cov1_2_3_5_8_9   | 31.388  | -464.885 | 0.4123532 | 0 | -0.079385236 | 0 | 0.021436825 |
| cov1_3_5_7_10_11 | 31.3904 | -464.886 | 0.4126155 | 0 | -0.064039762 | 0 | 0           |
| cov1_3_5_8_9_11  | 31.398  | -464.89  | 0.4127061 | 0 | -0.078144632 | 0 | 0           |
| cov1_3_4_8_9_11  | 31.4072 | -464.895 | 0.4126748 | 0 | -0.095611694 | 0 | 0           |
| cov2_3_4_5_8_10  | 31.4072 | -464.895 | 0.4102339 | 0 | 0            | 0 | 0.010599164 |
| cov1_2_3_8_9_11  | 31.4078 | -464.895 | 0.4137036 | 0 | -0.1231851   | 0 | 0.018008794 |
| cov2_3_5_8_9_10  | 31.4129 | -464.897 | 0.4106607 | 0 | 0            | 0 | 0.006478663 |
| cov2_3_5_8_10_11 | 31.4138 | -464.898 | 0.4106962 | 0 | 0            | 0 | 0.006334686 |
| cov2_3_4_7_8_9   | 31.4149 | -464.898 | 0.4077613 | 0 | 0            | 0 | -0.00601048 |
| cov3_5_8_9_10_11 | 31.4195 | -464.901 | 0.4108369 | 0 | 0            | 0 | 0           |
| cov3_4_5_8_9_10  | 31.4199 | -464.901 | 0.4107971 | 0 | 0            | 0 | 0           |
| cov3_4_5_8_10_11 | 31.4202 | -464.901 | 0.4108142 | 0 | 0            | 0 | 0           |
| cov2_3_5_6_10_11 | 31.4235 | -464.903 | 0.4089009 | 0 | 0            | 0 | 0.007152662 |
| cov3_5_6_9_10_11 | 31.4273 | -464.905 | 0.408934  | 0 | 0            | 0 | 0           |
| cov1_3_4_5_7_10  | 31.4285 | -464.905 | 0.4123244 | 0 | -0.053087893 | 0 | 0           |
| cov1_2_4_6_8_9   | 31.4296 | -464.906 | 0.4052006 | 0 | -0.1670993   | 0 | 0.074119062 |
| cov3_4_5_6_10_11 | 31.4303 | -464.906 | 0.4091916 | 0 | 0            | 0 | 0           |
| cov1_3_5_7_9_10  | 31.4306 | -464.906 | 0.4124833 | 0 | -0.052548274 | 0 | 0           |
| cov1_2_5_6_8_9   | 31.4313 | -464.907 | 0.4079273 | 0 | -0.089017616 | 0 | 0.024822264 |

|                  |         |          |           |   |              |   |              |
|------------------|---------|----------|-----------|---|--------------|---|--------------|
| cov1_2_5_6_9_11  | 31.4345 | -464.908 | 0.408259  | 0 | -0.092210134 | 0 | 0.024023871  |
| cov2_3_5_6_9_10  | 31.441  | -464.911 | 0.4087508 | 0 | 0            | 0 | 0.00533698   |
| cov3_4_5_6_9_10  | 31.4442 | -464.913 | 0.4090084 | 0 | 0            | 0 | 0            |
| cov1_2_5_6_7_9   | 31.4451 | -464.913 | 0.4080833 | 0 | -0.088172678 | 0 | 0.024712966  |
| cov2_3_4_5_6_10  | 31.4465 | -464.914 | 0.4088652 | 0 | 0            | 0 | 0.005287351  |
| cov1_2_3_7_10_11 | 31.4472 | -464.915 | 0.4140337 | 0 | -0.1233601   | 0 | 0.019986003  |
| cov1_3_4_5_8_9   | 31.448  | -464.915 | 0.4122538 | 0 | -0.065595906 | 0 | 0            |
| cov1_3_4_7_10_11 | 31.4495 | -464.916 | 0.4129415 | 0 | -0.093253035 | 0 | 0            |
| cov3_5_6_8_9_11  | 31.4663 | -464.924 | 0.4094108 | 0 | 0            | 0 | 0            |
| cov2_3_5_6_8_9   | 31.4726 | -464.927 | 0.4094704 | 0 | 0            | 0 | -0.004167224 |
| cov3_4_5_6_8_9   | 31.474  | -464.928 | 0.4092325 | 0 | 0            | 0 | 0            |
| cov1_2_3_7_9_10  | 31.4817 | -464.932 | 0.4139608 | 0 | -0.11420715  | 0 | 0.021240127  |
| cov1_2_4_6_7_9   | 31.4822 | -464.932 | 0.405432  | 0 | -0.16697807  | 0 | 0.073212157  |
| cov1_2_3_4_7_9   | 31.4892 | -464.936 | 0.4104686 | 0 | -0.099676419 | 0 | 0.047645688  |
| cov1_3_4_7_9_10  | 31.4943 | -464.938 | 0.4128461 | 0 | -0.081907805 | 0 | 0            |
| cov1_5_6_8_9_11  | 31.4955 | -464.939 | 0.4080766 | 0 | -0.078948598 | 0 | 0            |
| cov1_3_7_9_10_11 | 31.5067 | -464.944 | 0.4141643 | 0 | -0.10758908  | 0 | 0            |
| cov1_4_5_6_8_9   | 31.5114 | -464.947 | 0.407571  | 0 | -0.072356923 | 0 | 0            |
| cov1_4_5_6_9_11  | 31.5142 | -464.948 | 0.4080596 | 0 | -0.076401654 | 0 | 0            |
| cov1_5_6_7_9_11  | 31.5168 | -464.949 | 0.4082195 | 0 | -0.076909831 | 0 | 0            |
| cov2_4_5_6_8_10  | 31.5187 | -464.95  | 0.4068484 | 0 | 0            | 0 | 0.014883458  |
| cov2_4_5_6_10_11 | 31.5259 | -464.954 | 0.4070489 | 0 | 0            | 0 | 0.015600573  |
| cov2_4_5_6_9_10  | 31.526  | -464.954 | 0.4070648 | 0 | 0            | 0 | 0.013647227  |
| cov2_5_6_8_9_10  | 31.5263 | -464.954 | 0.4072884 | 0 | 0            | 0 | 0.00893111   |
| cov1_4_5_6_7_9   | 31.5283 | -464.955 | 0.4078006 | 0 | -0.071332016 | 0 | 0            |
| cov2_5_6_8_10_11 | 31.5309 | -464.956 | 0.4073775 | 0 | 0            | 0 | 0.009617978  |
| cov2_5_6_9_10_11 | 31.5315 | -464.957 | 0.4074165 | 0 | 0            | 0 | 0.009849251  |
| cov2_4_5_6_7_10  | 31.5322 | -464.957 | 0.4071208 | 0 | 0            | 0 | 0.013842113  |
| cov2_5_6_7_9_10  | 31.5351 | -464.958 | 0.4074598 | 0 | 0            | 0 | 0.008997192  |
| cov2_5_6_7_10_11 | 31.5371 | -464.959 | 0.4075403 | 0 | 0            | 0 | 0.010052962  |
| cov4_5_6_8_9_10  | 31.5393 | -464.961 | 0.4072649 | 0 | 0            | 0 | 0            |
| cov1_2_4_6_9_11  | 31.5402 | -464.961 | 0.4060754 | 0 | -0.16760686  | 0 | 0.070204333  |
| cov5_6_8_9_10_11 | 31.5403 | -464.961 | 0.4073811 | 0 | 0            | 0 | 0            |
| cov4_5_6_8_10_11 | 31.5457 | -464.964 | 0.4073794 | 0 | 0            | 0 | 0            |
| cov4_5_6_9_10_11 | 31.5479 | -464.965 | 0.4074846 | 0 | 0            | 0 | 0            |
| cov5_6_7_9_10_11 | 31.5481 | -464.965 | 0.4075493 | 0 | 0            | 0 | 0            |
| cov4_5_6_7_9_10  | 31.5492 | -464.966 | 0.4075016 | 0 | 0            | 0 | 0            |
| cov4_5_6_7_10_11 | 31.5542 | -464.968 | 0.4076091 | 0 | 0            | 0 | 0            |
| cov2_3_4_5_7_10  | 31.5597 | -464.971 | 0.4099976 | 0 | 0            | 0 | 0.013599537  |
| cov1_3_4_6_9_10  | 31.5657 | -464.974 | 0.4109446 | 0 | -0.14323433  | 0 | 0            |
| cov1_3_4_6_10_11 | 31.5662 | -464.974 | 0.4110019 | 0 | -0.14226148  | 0 | 0            |
| cov2_3_5_7_9_10  | 31.5666 | -464.974 | 0.410468  | 0 | 0            | 0 | 0.009127561  |
| cov2_3_5_7_10_11 | 31.5674 | -464.975 | 0.4105036 | 0 | 0            | 0 | 0.009029411  |
| cov3_5_6_7_9_11  | 31.5736 | -464.978 | 0.4091988 | 0 | 0            | 0 | 0            |
| cov3_5_7_9_10_11 | 31.5802 | -464.981 | 0.4107249 | 0 | 0            | 0 | 0            |
| cov3_4_5_7_10_11 | 31.5811 | -464.981 | 0.4107486 | 0 | 0            | 0 | 0            |
| cov3_4_5_7_9_10  | 31.5812 | -464.982 | 0.4107401 | 0 | 0            | 0 | 0            |

|                  |         |          |           |   |              |   |              |
|------------------|---------|----------|-----------|---|--------------|---|--------------|
| cov2_3_5_6_7_9   | 31.5835 | -464.983 | 0.4092039 | 0 | 0            | 0 | -0.002160347 |
| cov3_4_5_6_7_9   | 31.5837 | -464.983 | 0.4090671 | 0 | 0            | 0 | 0            |
| cov1_2_3_5_7_9   | 31.597  | -464.989 | 0.4119675 | 0 | -0.070276915 | 0 | 0.022062376  |
| cov1_3_5_7_9_11  | 31.6224 | -465.002 | 0.4123117 | 0 | -0.067297987 | 0 | 0            |
| cov2_4_7_8_10_11 | 31.6361 | -465.009 | 0.4040492 | 0 | 0            | 0 | 0.03342233   |
| cov1_2_7_8_10_11 | 31.6462 | -465.014 | 0.4093865 | 0 | -0.11923112  | 0 | 0.021723058  |
| cov2_3_7_8_10_11 | 31.6535 | -465.018 | 0.4131179 | 0 | 0            | 0 | -0.047466272 |
| cov1_3_4_7_9_11  | 31.6605 | -465.021 | 0.4125016 | 0 | -0.092570154 | 0 | 0            |
| cov1_3_4_5_7_9   | 31.6647 | -465.023 | 0.4119375 | 0 | -0.055783802 | 0 | 0            |
| cov1_2_3_7_9_11  | 31.6702 | -465.026 | 0.4136524 | 0 | -0.12165468  | 0 | 0.018230945  |
| cov2_3_5_6_9_11  | 31.6722 | -465.027 | 0.4085567 | 0 | 0            | 0 | 0.004215152  |
| cov2_3_4_5_8_9   | 31.6724 | -465.027 | 0.4097982 | 0 | 0            | 0 | 0.008867727  |
| cov2_3_6_7_8_10  | 31.675  | -465.028 | 0.4132459 | 0 | 0            | 0 | -0.042043943 |
| cov3_4_5_6_9_11  | 31.6751 | -465.028 | 0.4086756 | 0 | 0            | 0 | 0            |
| cov2_3_5_8_9_11  | 31.6803 | -465.031 | 0.4103176 | 0 | 0            | 0 | 0.003675223  |
| cov3_4_5_8_9_11  | 31.6805 | -465.031 | 0.4102678 | 0 | 0            | 0 | 0            |
| cov1_2_7_8_9_10  | 31.6869 | -465.034 | 0.4092896 | 0 | -0.10904988  | 0 | 0.022938092  |
| cov1_2_3_4_5_10  | 31.6875 | -465.035 | 0.4091486 | 0 | -0.043081835 | 0 | 0.042311311  |
| cov2_3_4_5_6_9   | 31.6881 | -465.035 | 0.4084423 | 0 | 0            | 0 | 0.003425467  |
| cov1_7_8_9_10_11 | 31.7168 | -465.049 | 0.4094056 | 0 | -0.10181036  | 0 | 0            |
| cov1_3_4_6_9_11  | 31.7173 | -465.05  | 0.4106157 | 0 | -0.14188266  | 0 | 0            |
| cov1_2_3_6_10_11 | 31.7186 | -465.05  | 0.4132514 | 0 | -0.17992322  | 0 | 0.019530899  |
| cov1_2_3_6_9_10  | 31.7229 | -465.052 | 0.413266  | 0 | -0.18247361  | 0 | 0.019138121  |
| cov2_4_6_7_8_10  | 31.7258 | -465.054 | 0.4042975 | 0 | 0            | 0 | 0.029563148  |
| cov1_2_3_5_10_11 | 31.7324 | -465.057 | 0.410289  | 0 | -0.032862606 | 0 | 0.026271219  |
| cov1_2_3_5_9_10  | 31.7365 | -465.059 | 0.4102751 | 0 | -0.030098005 | 0 | 0.026613189  |
| cov2_4_5_6_8_9   | 31.7512 | -465.067 | 0.4065539 | 0 | 0            | 0 | 0.0124626    |
| cov1_2_7_8_9_11  | 31.7563 | -465.069 | 0.4091783 | 0 | -0.11784544  | 0 | 0.020324295  |
| cov2_4_5_6_9_11  | 31.7596 | -465.071 | 0.4067699 | 0 | 0            | 0 | 0.012786605  |
| cov2_4_5_6_7_9   | 31.7634 | -465.073 | 0.4068254 | 0 | 0            | 0 | 0.011427143  |
| cov2_4_7_8_9_10  | 31.7647 | -465.073 | 0.4039399 | 0 | 0            | 0 | 0.020955225  |
| cov2_5_6_8_9_11  | 31.7661 | -465.074 | 0.4071254 | 0 | 0            | 0 | 0.006573235  |
| cov2_4_7_8_9_11  | 31.7678 | -465.075 | 0.4038266 | 0 | 0            | 0 | 0.030912755  |
| cov4_7_8_9_10_11 | 31.769  | -465.075 | 0.4051711 | 0 | 0            | 0 | 0            |
| cov4_5_6_8_9_11  | 31.7703 | -465.076 | 0.4069993 | 0 | 0            | 0 | 0            |
| cov2_5_6_7_9_11  | 31.7717 | -465.077 | 0.4072881 | 0 | 0            | 0 | 0.007016602  |
| cov2_3_4_5_9_10  | 31.7752 | -465.079 | 0.4089835 | 0 | 0            | 0 | 0.023826977  |
| cov1_3_6_9_10_11 | 31.7757 | -465.079 | 0.4132641 | 0 | -0.16482857  | 0 | 0            |
| cov2_3_4_5_10_11 | 31.7757 | -465.079 | 0.4090312 | 0 | 0            | 0 | 0.024332419  |
| cov4_5_6_7_9_11  | 31.7787 | -465.08  | 0.4072302 | 0 | 0            | 0 | 0            |
| cov4_6_7_8_10_11 | 31.78   | -465.081 | 0.4052715 | 0 | 0            | 0 | 0            |
| cov2_3_5_9_10_11 | 31.7878 | -465.085 | 0.4096422 | 0 | 0            | 0 | 0.018312263  |
| cov3_6_7_8_10_11 | 31.7947 | -465.088 | 0.4127349 | 0 | 0            | 0 | 0            |
| cov2_3_4_5_7_9   | 31.8157 | -465.099 | 0.4095651 | 0 | 0            | 0 | 0.011899363  |
| cov1_2_4_5_8_10  | 31.817  | -465.099 | 0.4062452 | 0 | -0.038389797 | 0 | 0.055421428  |
| cov4_6_7_8_9_10  | 31.8207 | -465.101 | 0.4050865 | 0 | 0            | 0 | 0            |
| cov2_3_5_7_9_11  | 31.8251 | -465.103 | 0.4101273 | 0 | 0            | 0 | 0.006423626  |

|                  |         |          |           |   |              |   |              |
|------------------|---------|----------|-----------|---|--------------|---|--------------|
| cov2_3_7_8_9_11  | 31.8251 | -465.103 | 0.4126017 | 0 | 0            | 0 | -0.048012664 |
| cov3_4_5_7_9_11  | 31.8311 | -465.106 | 0.4102074 | 0 | 0            | 0 | 0            |
| cov1_3_4_5_10_11 | 31.8334 | -465.108 | 0.4106345 | 0 | -0.014337581 | 0 | 0            |
| cov1_3_5_9_10_11 | 31.8351 | -465.108 | 0.410443  | 0 | -0.014399639 | 0 | 0            |
| cov1_2_4_5_10_11 | 31.8371 | -465.11  | 0.4070311 | 0 | -0.039283219 | 0 | 0.049418821  |
| cov2_3_6_7_8_9   | 31.8376 | -465.11  | 0.4127342 | 0 | 0            | 0 | -0.042615011 |
| cov1_3_4_5_9_10  | 31.8405 | -465.111 | 0.4106026 | 0 | -0.010226478 | 0 | 0            |
| cov2_4_6_7_8_9   | 31.8447 | -465.113 | 0.4040395 | 0 | 0            | 0 | 0.027347814  |
| cov3_4_5_9_10_11 | 31.8455 | -465.114 | 0.4102657 | 0 | 0            | 0 | 0            |
| cov1_2_4_5_7_10  | 31.8473 | -465.115 | 0.4065468 | 0 | -0.035754955 | 0 | 0.053299091  |
| cov1_2_4_5_9_10  | 31.8564 | -465.119 | 0.406798  | 0 | -0.032967181 | 0 | 0.051191244  |
| cov1_4_6_8_10_11 | 31.8592 | -465.121 | 0.4074381 | 0 | -0.14026812  | 0 | 0            |
| cov2_4_5_8_10_11 | 31.8775 | -465.13  | 0.4066193 | 0 | 0            | 0 | 0.033928779  |
| cov1_2_3_6_9_11  | 31.8779 | -465.13  | 0.4129085 | 0 | -0.17838167  | 0 | 0.017912864  |
| cov1_2_3_4_10_11 | 31.8852 | -465.134 | 0.4088373 | 0 | -0.095467789 | 0 | 0.060427315  |
| cov1_2_3_4_9_10  | 31.8856 | -465.134 | 0.4088298 | 0 | -0.094519949 | 0 | 0.060527184  |
| cov2_4_5_8_9_10  | 31.8856 | -465.134 | 0.406458  | 0 | 0            | 0 | 0.037107808  |
| cov4_6_7_8_9_11  | 31.8915 | -465.137 | 0.4049543 | 0 | 0            | 0 | 0            |
| cov1_4_6_8_9_10  | 31.892  | -465.137 | 0.4072308 | 0 | -0.13099989  | 0 | 0            |
| cov2_4_5_7_10_11 | 31.902  | -465.142 | 0.4068811 | 0 | 0            | 0 | 0.03369507   |
| cov1_2_3_4_5_9   | 31.9022 | -465.142 | 0.408853  | 0 | -0.046194004 | 0 | 0.041369385  |
| cov2_4_5_9_10_11 | 31.9049 | -465.143 | 0.4069917 | 0 | 0            | 0 | 0.033593412  |
| cov2_4_5_7_9_10  | 31.9066 | -465.144 | 0.4067404 | 0 | 0            | 0 | 0.036238281  |
| cov1_4_6_7_10_11 | 31.908  | -465.145 | 0.4076352 | 0 | -0.13936124  | 0 | 0            |
| cov1_2_5_8_10_11 | 31.9125 | -465.147 | 0.4080285 | 0 | -0.023214047 | 0 | 0.027758543  |
| cov2_3_7_8_9_10  | 31.9282 | -465.155 | 0.4133073 | 0 | 0            | 0 | -0.068118192 |
| cov1_4_6_7_9_10  | 31.9316 | -465.157 | 0.4074431 | 0 | -0.13126059  | 0 | 0            |
| cov1_2_5_7_10_11 | 31.9337 | -465.158 | 0.4081912 | 0 | -0.021020517 | 0 | 0.027806847  |
| cov1_2_5_9_10_11 | 31.9359 | -465.159 | 0.4082384 | 0 | -0.01964365  | 0 | 0.027759193  |
| cov2_5_8_9_10_11 | 31.9398 | -465.161 | 0.4077389 | 0 | 0            | 0 | 0.021904271  |
| cov1_4_6_9_10_11 | 31.9488 | -465.165 | 0.4079508 | 0 | -0.13632353  | 0 | 0            |
| cov1_2_3_5_9_11  | 31.9508 | -465.166 | 0.4100704 | 0 | -0.036032521 | 0 | 0.024069559  |
| cov1_2_5_8_9_10  | 31.9556 | -465.169 | 0.4078725 | 0 | -0.011826021 | 0 | 0.029013041  |
| cov2_5_7_9_10_11 | 31.9559 | -465.169 | 0.407925  | 0 | 0            | 0 | 0.022507143  |
| cov1_2_5_7_9_10  | 31.9655 | -465.174 | 0.4080514 | 0 | -0.011170824 | 0 | 0.028877947  |
| cov1_2_4_8_10_11 | 31.9713 | -465.177 | 0.4055419 | 0 | -0.10048193  | 0 | 0.074845603  |
| cov1_4_6_8_9_11  | 31.9778 | -465.18  | 0.4071845 | 0 | -0.13994806  | 0 | 0            |
| cov3_6_7_8_9_11  | 31.9902 | -465.186 | 0.4122582 | 0 | 0            | 0 | 0            |
| cov2_3_4_5_9_11  | 32.0038 | -465.193 | 0.4086836 | 0 | 0            | 0 | 0.021618844  |
| cov1_2_4_8_9_10  | 32.0133 | -465.198 | 0.405376  | 0 | -0.089816418 | 0 | 0.076487266  |
| cov1_2_4_5_8_9   | 32.0217 | -465.202 | 0.4060422 | 0 | -0.041532096 | 0 | 0.054098947  |
| cov4_5_8_9_10_11 | 32.0244 | -465.203 | 0.407869  | 0 | 0            | 0 | 0            |
| cov1_4_5_8_10_11 | 32.0248 | -465.203 | 0.4079723 | 0 | -0.004301926 | 0 | 0            |
| cov1_4_6_7_9_11  | 32.0259 | -465.204 | 0.4073821 | 0 | -0.13904397  | 0 | 0            |
| cov1_5_8_9_10_11 | 32.0266 | -465.204 | 0.4080964 | 0 | -0.003187469 | 0 | 0            |
| cov1_2_4_7_10_11 | 32.0328 | -465.207 | 0.4057767 | 0 | -0.099133152 | 0 | 0.074061217  |
| cov1_2_4_5_9_11  | 32.0349 | -465.208 | 0.4068324 | 0 | -0.043213051 | 0 | 0.04793548   |

|                  |         |          |           |   |              |              |
|------------------|---------|----------|-----------|---|--------------|--------------|
| cov3_6_7_8_9_10  | 32.0369 | -465.209 | 0.4127548 | 0 | 0            | 0            |
| cov1_3_4_5_9_11  | 32.0372 | -465.21  | 0.4102825 | 0 | -0.018941432 | 0            |
| cov4_5_7_9_10_11 | 32.0471 | -465.214 | 0.4081291 | 0 | 0            | 0            |
| cov1_5_7_9_10_11 | 32.0482 | -465.215 | 0.4082596 | 0 | -0.00096391  | 0            |
| cov1_4_5_7_10_11 | 32.0483 | -465.215 | 0.4082018 | 0 | -0.001761378 | 0            |
| cov1_4_5_9_10_11 | 32.0506 | -465.216 | 0.4082747 | 0 | 7.46E-06     | 0            |
| cov1_2_4_5_7_9   | 32.0513 | -465.217 | 0.4063401 | 0 | -0.038894353 | 0.051980574  |
| cov1_2_3_4_9_11  | 32.0609 | -465.221 | 0.4086013 | 0 | -0.094589826 | 0.057726817  |
| cov1_2_4_7_9_10  | 32.0643 | -465.223 | 0.4056316 | 0 | -0.089861068 | 0.075473566  |
| cov1_4_5_8_9_10  | 32.0799 | -465.231 | 0.4078007 | 0 | 0.009922382  | 0            |
| cov1_4_5_7_9_10  | 32.0902 | -465.236 | 0.4080452 | 0 | 0.010724486  | 0            |
| cov2_4_5_8_9_11  | 32.0913 | -465.237 | 0.4064019 | 0 | 0            | 0.030735583  |
| cov1_2_4_9_10_11 | 32.0947 | -465.238 | 0.4062822 | 0 | -0.095520712 | 0.07203799   |
| cov2_4_5_7_9_11  | 32.1149 | -465.248 | 0.4066649 | 0 | 0            | 0.030507752  |
| cov1_2_5_8_9_11  | 32.1174 | -465.25  | 0.4078736 | 0 | -0.02654225  | 0.025518037  |
| cov1_2_4_8_9_11  | 32.1323 | -465.257 | 0.405432  | 0 | -0.099356571 | 0.071596872  |
| cov1_2_5_7_9_11  | 32.1383 | -465.26  | 0.4080354 | 0 | -0.024350984 | 0.025566948  |
| cov1_2_4_7_9_11  | 32.1923 | -465.287 | 0.4056666 | 0 | -0.09802228  | 0.070830063  |
| cov1_4_5_8_9_11  | 32.2085 | -465.295 | 0.4077013 | 0 | -0.009210854 | 0            |
| cov3_4_8_9_10_11 | 32.226  | -465.304 | 0.4094295 | 0 | 0            | 0            |
| cov3_4_6_8_10_11 | 32.2281 | -465.305 | 0.4097329 | 0 | 0            | 0            |
| cov2_3_4_8_10_11 | 32.2308 | -465.306 | 0.4092776 | 0 | 0            | 0.004941891  |
| cov1_4_5_7_9_11  | 32.2329 | -465.307 | 0.4079308 | 0 | -0.006697289 | 0            |
| cov3_7_8_9_10_11 | 32.2463 | -465.314 | 0.4124906 | 0 | 0            | 0            |
| cov1_3_4_9_10_11 | 32.2489 | -465.315 | 0.4110979 | 0 | -0.071122938 | 0            |
| cov3_4_6_8_9_10  | 32.3359 | -465.359 | 0.4094541 | 0 | 0            | 0            |
| cov1_2_3_9_10_11 | 32.3401 | -465.361 | 0.4130018 | 0 | -0.11047862  | 0.021217684  |
| cov2_3_4_6_8_10  | 32.3453 | -465.364 | 0.4095812 | 0 | 0            | 0.000504636  |
| cov1_2_6_8_10_11 | 32.3663 | -465.374 | 0.4102808 | 0 | -0.19159391  | 0.020318509  |
| cov1_2_6_8_9_10  | 32.3955 | -465.389 | 0.4101665 | 0 | -0.18422139  | 0.021266769  |
| cov1_2_6_7_10_11 | 32.3966 | -465.389 | 0.4104376 | 0 | -0.19001082  | 0.020340237  |
| cov2_3_4_8_9_10  | 32.3973 | -465.39  | 0.4090745 | 0 | 0            | -0.007643553 |
| cov1_2_6_9_10_11 | 32.4088 | -465.395 | 0.4105768 | 0 | -0.187709    | 0.020285514  |
| cov1_2_6_7_9_10  | 32.4174 | -465.4   | 0.4103331 | 0 | -0.1836966   | 0.021128373  |
| cov3_4_7_9_10_11 | 32.4235 | -465.403 | 0.4093309 | 0 | 0            | 0            |
| cov2_3_4_7_10_11 | 32.4241 | -465.403 | 0.4090177 | 0 | 0            | 0.007854222  |
| cov1_6_8_9_10_11 | 32.427  | -465.404 | 0.4102562 | 0 | -0.1758463   | 0            |
| cov3_4_6_8_9_11  | 32.4276 | -465.405 | 0.4091941 | 0 | 0            | 0            |
| cov3_4_6_7_10_11 | 32.4289 | -465.405 | 0.4095638 | 0 | 0            | 0            |
| cov2_3_4_8_9_11  | 32.4306 | -465.406 | 0.4088389 | 0 | 0            | 0.003337558  |
| cov1_6_7_9_10_11 | 32.4575 | -465.42  | 0.410413  | 0 | -0.17425014  | 0            |
| cov1_2_6_8_9_11  | 32.4789 | -465.43  | 0.4100498 | 0 | -0.18984989  | 0.018850106  |
| cov1_2_6_7_9_11  | 32.5088 | -465.445 | 0.4102064 | 0 | -0.18827264  | 0.018877146  |
| cov2_3_4_6_8_9   | 32.528  | -465.455 | 0.4090974 | 0 | 0            | -0.000798844 |
| cov3_4_6_7_9_10  | 32.5485 | -465.465 | 0.4092672 | 0 | 0            | 0            |
| cov2_3_4_6_7_10  | 32.5578 | -465.47  | 0.4092989 | 0 | 0            | 0.002525757  |
| cov1_4_8_9_10_11 | 32.5632 | -465.473 | 0.4074449 | 0 | -0.067495876 | 0            |

|                  |         |          |           |   |              |   |              |
|------------------|---------|----------|-----------|---|--------------|---|--------------|
| cov2_3_4_7_9_10  | 32.6025 | -465.492 | 0.4088041 | 0 | 0            | 0 | -0.005183225 |
| cov1_4_7_9_10_11 | 32.6122 | -465.497 | 0.4076638 | 0 | -0.066484882 | 0 | 0            |
| cov2_3_4_7_9_11  | 32.6145 | -465.498 | 0.4085803 | 0 | 0            | 0 | 0.00630056   |
| cov3_4_6_7_9_11  | 32.6176 | -465.5   | 0.4090266 | 0 | 0            | 0 | 0            |
| cov2_3_4_6_7_9   | 32.7296 | -465.556 | 0.4088118 | 0 | 0            | 0 | 0.001282334  |
| cov2_3_6_8_10_11 | 32.7393 | -465.561 | 0.4139595 | 0 | 0            | 0 | -0.039767324 |
| cov2_3_8_9_10_11 | 32.796  | -465.589 | 0.4138772 | 0 | 0            | 0 | -0.049171155 |
| cov2_3_4_9_10_11 | 32.8008 | -465.591 | 0.4074078 | 0 | 0            | 0 | 0.021599454  |
| cov2_3_4_6_10_11 | 32.809  | -465.595 | 0.4075434 | 0 | 0            | 0 | 0.021416834  |
| cov1_3_5_6_7_8   | 32.8432 | -465.613 | 0.417884  | 0 | -0.20654269  | 0 | 0            |
| cov3_4_6_9_10_11 | 32.8516 | -465.617 | 0.4083601 | 0 | 0            | 0 | 0            |
| cov2_3_6_8_9_10  | 32.8601 | -465.621 | 0.4140493 | 0 | 0            | 0 | -0.046597828 |
| cov1_3_6_7_8_11  | 32.9026 | -465.642 | 0.4170243 | 0 | -0.18070537  | 0 | 0            |
| cov1_2_3_6_7_8   | 32.9153 | -465.649 | 0.416937  | 0 | -0.18254363  | 0 | 0.014210733  |
| cov2_3_6_8_9_11  | 32.9257 | -465.654 | 0.4134738 | 0 | 0            | 0 | -0.040887975 |
| cov1_3_4_6_7_8   | 32.9456 | -465.664 | 0.4168682 | 0 | -0.1704854   | 0 | 0            |
| cov2_3_4_6_9_11  | 32.9604 | -465.671 | 0.4071854 | 0 | 0            | 0 | 0.019148499  |
| cov2_4_8_9_10_11 | 32.9642 | -465.673 | 0.4043883 | 0 | 0            | 0 | 0.033744331  |
| cov1_2_8_9_10_11 | 32.9727 | -465.677 | 0.4099673 | 0 | -0.12261515  | 0 | 0.021911388  |
| cov2_4_6_8_10_11 | 32.9766 | -465.679 | 0.4045422 | 0 | 0            | 0 | 0.033898771  |
| cov2_3_6_7_10_11 | 32.9787 | -465.68  | 0.4138848 | 0 | 0            | 0 | -0.039284685 |
| cov2_4_7_9_10_11 | 32.9988 | -465.69  | 0.4046275 | 0 | 0            | 0 | 0.033508486  |
| cov1_2_7_9_10_11 | 33.0033 | -465.693 | 0.4101425 | 0 | -0.12088516  | 0 | 0.021937172  |
| cov1_3_5_7_8_11  | 33.0074 | -465.695 | 0.4177382 | 0 | -0.1738554   | 0 | 0            |
| cov2_4_6_7_10_11 | 33.0108 | -465.696 | 0.404771  | 0 | 0            | 0 | 0.033458386  |
| cov2_4_6_9_10_11 | 33.0122 | -465.697 | 0.4048658 | 0 | 0            | 0 | 0.032916197  |
| cov2_3_4_6_9_10  | 33.0145 | -465.698 | 0.4073699 | 0 | 0            | 0 | 0.014121137  |
| cov2_6_7_8_10_11 | 33.0187 | -465.7   | 0.4093449 | 0 | 0            | 0 | -0.031499847 |
| cov1_3_4_5_7_8   | 33.0255 | -465.704 | 0.4168396 | 0 | -0.16167574  | 0 | 0            |
| cov2_3_7_9_10_11 | 33.0274 | -465.705 | 0.4137993 | 0 | 0            | 0 | -0.048072998 |
| cov1_2_3_5_7_8   | 33.0417 | -465.712 | 0.4175708 | 0 | -0.17022107  | 0 | 0.013720582  |
| cov3_6_8_9_10_11 | 33.0426 | -465.712 | 0.4135317 | 0 | 0            | 0 | 0            |
| cov2_4_6_8_9_10  | 33.0605 | -465.721 | 0.4045473 | 0 | 0            | 0 | 0.027725329  |
| cov1_2_3_7_8_11  | 33.0795 | -465.731 | 0.4167743 | 0 | -0.14980477  | 0 | 0.014236393  |
| cov2_6_7_8_9_11  | 33.0949 | -465.738 | 0.409043  | 0 | 0            | 0 | -0.032427185 |
| cov2_6_7_8_9_10  | 33.0989 | -465.74  | 0.4093153 | 0 | 0            | 0 | -0.037335496 |
| cov4_6_8_9_10_11 | 33.1004 | -465.741 | 0.4054722 | 0 | 0            | 0 | 0            |
| cov2_4_6_8_9_11  | 33.1079 | -465.745 | 0.4043181 | 0 | 0            | 0 | 0.03112803   |
| cov1_3_4_7_8_11  | 33.1098 | -465.746 | 0.4168069 | 0 | -0.13872359  | 0 | 0            |
| cov2_4_6_7_9_10  | 33.1117 | -465.747 | 0.4047911 | 0 | 0            | 0 | 0.0267545    |
| cov2_3_6_7_9_10  | 33.1158 | -465.749 | 0.4139798 | 0 | 0            | 0 | -0.046573666 |
| cov2_7_8_9_10_11 | 33.1174 | -465.75  | 0.4092667 | 0 | 0            | 0 | -0.0440567   |
| cov1_2_3_4_7_8   | 33.1195 | -465.751 | 0.4159628 | 0 | -0.13561375  | 0 | 0.022687702  |
| cov4_6_7_9_10_11 | 33.1314 | -465.757 | 0.4056873 | 0 | 0            | 0 | 0            |
| cov2_4_6_7_9_11  | 33.1412 | -465.762 | 0.4045451 | 0 | 0            | 0 | 0.030690909  |
| cov2_3_6_7_9_11  | 33.155  | -465.768 | 0.4134019 | 0 | 0            | 0 | -0.04036165  |
| cov1_2_4_6_7_8   | 33.162  | -465.772 | 0.4126478 | 0 | -0.17222384  | 0 | 0.038676495  |

|                  |         |          |           |   |             |              |
|------------------|---------|----------|-----------|---|-------------|--------------|
| cov6_7_8_9_10_11 | 33.2042 | -465.793 | 0.4090847 | 0 | 0           | 0            |
| cov3_6_7_9_10_11 | 33.2742 | -465.828 | 0.4134582 | 0 | 0           | 0            |
| cov1_4_6_7_8_11  | 33.2813 | -465.832 | 0.4132229 | 0 | -0.16140758 | 0            |
| cov1_4_5_6_7_8   | 33.3292 | -465.856 | 0.4131375 | 0 | -0.15110395 | 0            |
| cov1_5_6_7_8_11  | 33.3323 | -465.857 | 0.4140979 | 0 | -0.1585869  | 0            |
| cov1_2_5_6_7_8   | 33.3352 | -465.859 | 0.4140693 | 0 | -0.16152149 | 0.016773831  |
| cov1_2_6_7_8_11  | 33.3393 | -465.861 | 0.414062  | 0 | -0.1860426  | 0.015004304  |
| cov1_2_4_7_8_11  | 33.3468 | -465.864 | 0.4124928 | 0 | -0.13761456 | 0.038029256  |
| cov1_2_4_5_7_8   | 33.3595 | -465.871 | 0.4115842 | 0 | -0.14582916 | 0.050144363  |
| cov1_2_5_7_8_11  | 33.5039 | -465.943 | 0.4138494 | 0 | -0.12809828 | 0.016824502  |
| cov1_4_5_7_8_11  | 33.5071 | -465.945 | 0.4130458 | 0 | -0.11659978 | 0            |
| cov2_3_6_9_10_11 | 33.5967 | -465.989 | 0.4128849 | 0 | 0           | -0.034309062 |
| cov1_3_4_5_6_8   | 33.7299 | -466.056 | 0.4179394 | 0 | -0.22975639 | 0            |
| cov1_3_5_6_8_11  | 33.7461 | -466.064 | 0.4190815 | 0 | -0.23716498 | 0            |
| cov1_2_3_5_6_8   | 33.7814 | -466.082 | 0.4189281 | 0 | -0.2343539  | 0.01170835   |
| cov1_2_3_6_8_11  | 33.8748 | -466.128 | 0.4179399 | 0 | -0.20393547 | 0.012807349  |
| cov1_3_4_6_8_11  | 33.8993 | -466.141 | 0.4179451 | 0 | -0.19421016 | 0            |
| cov1_2_3_4_6_8   | 33.9112 | -466.147 | 0.4171662 | 0 | -0.19265865 | 0.020695247  |
| cov1_2_3_4_5_8   | 33.9135 | -466.148 | 0.4163538 | 0 | -0.20878614 | 0.045943656  |
| cov1_3_4_5_6_7   | 33.9146 | -466.148 | 0.4176716 | 0 | -0.22119585 | 0            |
| cov1_3_5_6_7_11  | 33.9312 | -466.157 | 0.418728  | 0 | -0.22775845 | 0            |
| cov1_2_3_5_6_7   | 33.9538 | -466.168 | 0.4185845 | 0 | -0.22633217 | 0.012296291  |
| cov1_3_4_5_8_11  | 34.0055 | -466.194 | 0.4179448 | 0 | -0.18777697 | 0            |
| cov1_2_3_6_7_11  | 34.0062 | -466.194 | 0.4177759 | 0 | -0.20249747 | 0.013067801  |
| cov1_2_3_4_6_7   | 34.0236 | -466.203 | 0.4168076 | 0 | -0.19150239 | 0.022804056  |
| cov1_3_4_6_7_11  | 34.0312 | -466.207 | 0.4176533 | 0 | -0.19120738 | 0            |
| cov1_2_3_5_8_11  | 34.0437 | -466.213 | 0.4187794 | 0 | -0.19366146 | 0.011802885  |
| cov1_2_3_4_5_6   | 34.1106 | -466.246 | 0.4148291 | 0 | -0.21130295 | 0.041109109  |
| cov1_2_3_4_5_7   | 34.1145 | -466.248 | 0.4160883 | 0 | -0.19814021 | 0.045056674  |
| cov1_2_3_4_6_11  | 34.1647 | -466.273 | 0.415494  | 0 | -0.18984306 | 0.029149744  |
| cov1_2_3_4_8_11  | 34.1815 | -466.282 | 0.4171669 | 0 | -0.15144506 | 0.019299506  |
| cov1_3_4_5_7_11  | 34.2135 | -466.298 | 0.4176408 | 0 | -0.17652283 | 0            |
| cov1_2_4_5_6_8   | 34.2213 | -466.302 | 0.4120725 | 0 | -0.20942165 | 0.053171742  |
| cov1_2_4_5_6_11  | 34.2284 | -466.305 | 0.4128397 | 0 | -0.20871045 | 0.047329326  |
| cov1_2_4_6_8_11  | 34.2352 | -466.309 | 0.4131828 | 0 | -0.19309842 | 0.038708683  |
| cov1_2_3_5_6_11  | 34.2386 | -466.31  | 0.4168938 | 0 | -0.19297627 | 0.014167001  |
| cov1_2_3_5_7_11  | 34.2386 | -466.31  | 0.4183923 | 0 | -0.18311366 | 0.012600952  |
| cov1_3_4_5_6_11  | 34.2423 | -466.312 | 0.4161913 | 0 | -0.18326248 | 0            |
| cov1_2_4_5_6_7   | 34.2461 | -466.314 | 0.4123615 | 0 | -0.20658917 | 0.051237607  |
| cov1_2_4_6_7_11  | 34.2593 | -466.321 | 0.4133685 | 0 | -0.19163397 | 0.038203413  |
| cov1_2_3_4_7_11  | 34.3144 | -466.348 | 0.416771  | 0 | -0.14833205 | 0.021723775  |
| cov1_4_5_6_8_11  | 34.4013 | -466.392 | 0.413637  | 0 | -0.17479757 | 0            |
| cov1_4_5_6_7_11  | 34.4213 | -466.402 | 0.4138667 | 0 | -0.17234364 | 0            |
| cov1_2_5_6_8_11  | 34.4292 | -466.406 | 0.4146888 | 0 | -0.18301374 | 0.015619695  |
| cov1_2_5_6_7_11  | 34.4393 | -466.411 | 0.414844  | 0 | -0.1808084  | 0.015684151  |
| cov1_2_3_4_5_11  | 34.4491 | -466.415 | 0.4147254 | 0 | -0.15862099 | 0.039888555  |
| cov2_6_7_9_10_11 | 34.4562 | -466.419 | 0.4100244 | 0 | 0           | -0.035523714 |



|                    |         |          |           |   |              |   |              |
|--------------------|---------|----------|-----------|---|--------------|---|--------------|
| cov2_6_8_9_10_11   | 34.4649 | -466.423 | 0.409861  | 0 | 0            | 0 | -0.036140668 |
| cov2_3_5_6_7_8     | 34.5276 | -466.455 | 0.4151871 | 0 | 0            | 0 | -0.025056548 |
| cov2_5_6_7_8_11    | 34.5325 | -466.457 | 0.414406  | 0 | 0            | 0 | -0.020155479 |
| cov1_2_4_5_8_11    | 34.5341 | -466.458 | 0.4120159 | 0 | -0.16160211  | 0 | 0.051091008  |
| cov2_4_5_6_7_8     | 34.5437 | -466.463 | 0.4147072 | 0 | 0            | 0 | -0.024888884 |
| cov1_2_4_5_7_11    | 34.5692 | -466.476 | 0.4123101 | 0 | -0.15753475  | 0 | 0.049252041  |
| cov4_5_6_7_8_11    | 34.5909 | -466.486 | 0.4140796 | 0 | 0            | 0 | 0            |
| cov2_4_5_7_8_11    | 34.5925 | -466.487 | 0.4150598 | 0 | 0            | 0 | -0.032115458 |
| cov3_5_6_7_8_11    | 34.5977 | -466.49  | 0.4149269 | 0 | 0            | 0 | 0            |
| cov2_3_5_7_8_11    | 34.6001 | -466.491 | 0.4149591 | 0 | 0            | 0 | -0.029252607 |
| cov3_4_5_6_7_8     | 34.6214 | -466.502 | 0.4144275 | 0 | 0            | 0 | 0            |
| cov2_3_4_5_7_8     | 34.6255 | -466.504 | 0.4157973 | 0 | 0            | 0 | -0.041668407 |
| cov3_4_5_7_8_11    | 34.7382 | -466.56  | 0.4140707 | 0 | 0            | 0 | 0            |
| cov3_4_6_7_8_11    | 34.8823 | -466.632 | 0.414024  | 0 | 0            | 0 | 0            |
| cov2_3_4_6_7_8     | 34.9023 | -466.642 | 0.4149432 | 0 | 0            | 0 | -0.026427043 |
| cov2_3_6_7_8_11    | 34.9397 | -466.661 | 0.4167501 | 0 | 0            | 0 | -0.042431612 |
| cov2_4_6_7_8_11    | 34.9586 | -466.67  | 0.4124609 | 0 | 0            | 0 | -0.008837659 |
| cov2_3_4_7_8_11    | 35.2734 | -466.828 | 0.4144549 | 0 | 0            | 0 | -0.040459642 |
| cov2_3_5_6_8_11    | 35.8114 | -467.097 | 0.4162049 | 0 | 0            | 0 | -0.027770189 |
| cov2_3_4_5_6_11    | 35.8158 | -467.099 | 0.4164042 | 0 | 0            | 0 | -0.030874108 |
| cov2_3_4_5_6_8     | 35.8197 | -467.101 | 0.4167878 | 0 | 0            | 0 | -0.035711269 |
| cov2_3_5_6_7_11    | 35.8231 | -467.102 | 0.4158276 | 0 | 0            | 0 | -0.025118126 |
| cov2_3_4_5_6_7     | 35.8353 | -467.109 | 0.4164005 | 0 | 0            | 0 | -0.033103917 |
| cov2_4_5_6_7_11    | 35.8367 | -467.109 | 0.4154144 | 0 | 0            | 0 | -0.025661039 |
| cov2_3_4_5_7_11    | 35.8479 | -467.115 | 0.4163478 | 0 | 0            | 0 | -0.03564314  |
| cov2_3_4_5_8_11    | 35.8531 | -467.117 | 0.4167473 | 0 | 0            | 0 | -0.039732448 |
| cov2_4_5_6_8_11    | 35.8659 | -467.124 | 0.4151818 | 0 | 0            | 0 | -0.025325293 |
| cov3_4_5_6_7_11    | 35.9139 | -467.148 | 0.4150838 | 0 | 0            | 0 | 0            |
| cov3_4_5_6_8_11    | 35.9213 | -467.152 | 0.4153726 | 0 | 0            | 0 | 0            |
| cov2_3_4_6_8_11    | 36.1503 | -467.266 | 0.4159603 | 0 | 0            | 0 | -0.027100995 |
| cov2_3_4_6_7_11    | 36.2163 | -467.299 | 0.4155137 | 0 | 0            | 0 | -0.023830046 |
| cov1_3_5_6_7_8_10  | 36.5518 | -463.952 | 0.4118367 | 0 | -0.11780964  | 0 | 0            |
| cov1_3_4_6_7_8_10  | 36.6213 | -463.987 | 0.4121    | 0 | -0.149554    | 0 | 0            |
| cov1_2_3_6_7_8_10  | 36.6497 | -464.001 | 0.4135092 | 0 | -0.18023755  | 0 | 0.018929956  |
| cov1_3_6_7_8_10_11 | 36.6877 | -464.02  | 0.4136588 | 0 | -0.17087676  | 0 | 0            |
| cov1_3_6_7_8_9_10  | 36.7038 | -464.028 | 0.4135692 | 0 | -0.16495314  | 0 | 0            |
| cov1_3_5_6_7_8_9   | 36.803  | -464.078 | 0.4114762 | 0 | -0.11927123  | 0 | 0            |
| cov1_3_4_6_7_8_9   | 36.8479 | -464.1   | 0.4116008 | 0 | -0.14730698  | 0 | 0            |
| cov1_2_3_6_7_8_9   | 36.8886 | -464.121 | 0.4130727 | 0 | -0.17690961  | 0 | 0.017173742  |
| cov1_3_6_7_8_9_11  | 36.9123 | -464.133 | 0.4132147 | 0 | -0.16977079  | 0 | 0            |
| cov1_2_3_4_7_8_10  | 36.9364 | -464.145 | 0.4100556 | 0 | -0.10133355  | 0 | 0.049532677  |
| cov1_2_3_5_7_8_10  | 37.0251 | -464.189 | 0.4114397 | 0 | -0.067673353 | 0 | 0.023842268  |
| cov3_5_6_7_8_10_11 | 37.0734 | -464.213 | 0.409133  | 0 | 0            | 0 | 0            |
| cov1_3_5_7_8_10_11 | 37.0759 | -464.214 | 0.4117973 | 0 | -0.061918989 | 0 | 0            |
| cov3_5_6_7_8_9_10  | 37.0796 | -464.216 | 0.4089945 | 0 | 0            | 0 | 0            |
| cov2_3_5_6_7_8_10  | 37.0835 | -464.218 | 0.4090393 | 0 | 0            | 0 | 0.001932914  |
| cov3_4_5_6_7_8_10  | 37.0841 | -464.218 | 0.4091093 | 0 | 0            | 0 | 0            |

|                    |         |          |           |   |              |   |              |
|--------------------|---------|----------|-----------|---|--------------|---|--------------|
| cov1_2_5_6_7_8_10  | 37.0859 | -464.219 | 0.4075407 | 0 | -0.07549715  | 0 | 0.026927911  |
| cov1_3_4_5_7_8_10  | 37.1085 | -464.231 | 0.4115289 | 0 | -0.051785122 | 0 | 0            |
| cov1_3_5_7_8_9_10  | 37.1104 | -464.232 | 0.4116662 | 0 | -0.051223213 | 0 | 0            |
| cov1_2_3_7_8_10_11 | 37.1371 | -464.245 | 0.413246  | 0 | -0.12166515  | 0 | 0.019776633  |
| cov1_3_4_7_8_10_11 | 37.1387 | -464.246 | 0.4121537 | 0 | -0.091784546 | 0 | 0            |
| cov1_2_3_7_8_9_10  | 37.1667 | -464.26  | 0.4131747 | 0 | -0.11319577  | 0 | 0.020923684  |
| cov1_3_4_7_8_9_10  | 37.1776 | -464.265 | 0.412057  | 0 | -0.081193986 | 0 | 0            |
| cov1_2_3_4_7_8_9   | 37.1784 | -464.266 | 0.4097044 | 0 | -0.098744712 | 0 | 0.047116891  |
| cov1_5_6_7_8_10_11 | 37.1805 | -464.267 | 0.4076911 | 0 | -0.061807917 | 0 | 0            |
| cov1_2_4_6_7_8_10  | 37.184  | -464.268 | 0.404917  | 0 | -0.15806788  | 0 | 0.075712679  |
| cov1_4_5_6_7_8_10  | 37.1918 | -464.272 | 0.4074034 | 0 | -0.05669651  | 0 | 0            |
| cov1_5_6_7_8_9_10  | 37.1918 | -464.272 | 0.4075216 | 0 | -0.055286426 | 0 | 0            |
| cov1_3_7_8_9_10_11 | 37.1957 | -464.274 | 0.4133649 | 0 | -0.10602832  | 0 | 0            |
| cov2_3_4_5_7_8_10  | 37.2328 | -464.293 | 0.4092439 | 0 | 0            | 0 | 0.01347606   |
| cov2_3_5_7_8_9_10  | 37.2388 | -464.296 | 0.4096882 | 0 | 0            | 0 | 0.00917481   |
| cov2_3_5_7_8_10_11 | 37.24   | -464.296 | 0.409736  | 0 | 0            | 0 | 0.009252512  |
| cov3_5_7_8_9_10_11 | 37.2532 | -464.303 | 0.4099572 | 0 | 0            | 0 | 0            |
| cov3_4_5_7_8_9_10  | 37.2537 | -464.303 | 0.4099705 | 0 | 0            | 0 | 0            |
| cov3_4_5_7_8_10_11 | 37.2544 | -464.304 | 0.4099962 | 0 | 0            | 0 | 0            |
| cov1_2_3_5_7_8_9   | 37.2803 | -464.317 | 0.411155  | 0 | -0.068759825 | 0 | 0.021777537  |
| cov1_2_3_4_6_8_10  | 37.2933 | -464.323 | 0.4110035 | 0 | -0.18238806  | 0 | 0.049344987  |
| cov1_2_5_6_7_8_9   | 37.3067 | -464.33  | 0.4073365 | 0 | -0.077253011 | 0 | 0.024668135  |
| cov1_3_5_7_8_9_11  | 37.3101 | -464.331 | 0.4114829 | 0 | -0.065127482 | 0 | 0            |
| cov2_4_5_6_7_8_10  | 37.3135 | -464.333 | 0.40636   | 0 | 0            | 0 | 0.017149025  |
| cov2_5_6_7_8_9_10  | 37.3211 | -464.337 | 0.4067947 | 0 | 0            | 0 | 0.011283428  |
| cov2_5_6_7_8_10_11 | 37.3247 | -464.339 | 0.4068789 | 0 | 0            | 0 | 0.012070932  |
| cov3_5_6_7_8_9_11  | 37.3391 | -464.346 | 0.4086666 | 0 | 0            | 0 | 0            |
| cov4_5_6_7_8_9_10  | 37.3435 | -464.348 | 0.4068618 | 0 | 0            | 0 | 0            |
| cov5_6_7_8_9_10_11 | 37.3436 | -464.348 | 0.406913  | 0 | 0            | 0 | 0            |
| cov3_4_5_6_7_8_9   | 37.3458 | -464.349 | 0.4085462 | 0 | 0            | 0 | 0            |
| cov2_3_5_6_7_8_9   | 37.3463 | -464.35  | 0.4086328 | 0 | 0            | 0 | -0.000305285 |
| cov1_3_4_5_7_8_9   | 37.3467 | -464.35  | 0.4111311 | 0 | -0.054416596 | 0 | 0            |
| cov4_5_6_7_8_10_11 | 37.3494 | -464.351 | 0.4069718 | 0 | 0            | 0 | 0            |
| cov1_3_4_7_8_9_11  | 37.3516 | -464.352 | 0.4117023 | 0 | -0.091053626 | 0 | 0            |
| cov1_2_4_6_7_8_9   | 37.3557 | -464.354 | 0.4047643 | 0 | -0.15554544  | 0 | 0.072434423  |
| cov1_2_3_7_8_9_11  | 37.3622 | -464.357 | 0.4128544 | 0 | -0.11990882  | 0 | 0.01799845   |
| cov1_5_6_7_8_9_11  | 37.379  | -464.366 | 0.4074684 | 0 | -0.065867395 | 0 | 0            |
| cov1_4_5_6_7_8_9   | 37.3912 | -464.372 | 0.4070822 | 0 | -0.060286796 | 0 | 0            |
| cov1_2_3_5_6_8_10  | 37.4305 | -464.392 | 0.4127716 | 0 | -0.1514677   | 0 | 0.021638101  |
| cov1_3_5_6_8_10_11 | 37.4802 | -464.416 | 0.4130667 | 0 | -0.14410813  | 0 | 0            |
| cov1_3_4_5_6_8_10  | 37.4891 | -464.421 | 0.4126053 | 0 | -0.13899255  | 0 | 0            |
| cov2_3_4_5_7_8_9   | 37.4901 | -464.421 | 0.4088018 | 0 | 0            | 0 | 0.011795884  |
| cov2_3_5_7_8_9_11  | 37.4992 | -464.426 | 0.4093516 | 0 | 0            | 0 | 0.006635346  |
| cov1_3_5_6_8_9_10  | 37.5005 | -464.427 | 0.4129282 | 0 | -0.13693615  | 0 | 0            |
| cov3_4_5_7_8_9_11  | 37.5059 | -464.429 | 0.4094462 | 0 | 0            | 0 | 0            |
| cov1_3_4_6_8_10_11 | 37.5089 | -464.431 | 0.4130797 | 0 | -0.16874954  | 0 | 0            |
| cov1_2_3_4_6_7_10  | 37.518  | -464.435 | 0.41079   | 0 | -0.18206299  | 0 | 0.050953579  |

|                    |         |          |           |   |              |   |             |
|--------------------|---------|----------|-----------|---|--------------|---|-------------|
| cov1_2_4_5_7_8_10  | 37.5207 | -464.437 | 0.405829  | 0 | -0.034392352 | 0 | 0.052376375 |
| cov1_3_4_6_8_9_10  | 37.5326 | -464.443 | 0.4129581 | 0 | -0.16162662  | 0 | 0           |
| cov1_2_3_6_8_10_11 | 37.5362 | -464.444 | 0.414413  | 0 | -0.19726627  | 0 | 0.018089379 |
| cov2_4_5_6_7_8_9   | 37.5432 | -464.448 | 0.4060655 | 0 | 0            | 0 | 0.01474688  |
| cov1_2_3_6_8_9_10  | 37.5541 | -464.453 | 0.4143335 | 0 | -0.19173731  | 0 | 0.018916437 |
| cov1_2_3_4_6_8_9   | 37.5543 | -464.454 | 0.4106211 | 0 | -0.17906763  | 0 | 0.046805673 |
| cov2_5_6_7_8_9_11  | 37.5574 | -464.455 | 0.4066263 | 0 | 0            | 0 | 0.009053998 |
| cov4_5_6_7_8_9_11  | 37.5701 | -464.461 | 0.406593  | 0 | 0            | 0 | 0           |
| cov2_4_5_7_8_10_11 | 37.5725 | -464.463 | 0.4061377 | 0 | 0            | 0 | 0.033758571 |
| cov2_4_5_7_8_9_10  | 37.5752 | -464.464 | 0.4060014 | 0 | 0            | 0 | 0.035984665 |
| cov1_3_6_8_9_10_11 | 37.5853 | -464.469 | 0.4144857 | 0 | -0.18339312  | 0 | 0           |
| cov1_2_5_7_8_10_11 | 37.6067 | -464.48  | 0.4074211 | 0 | -0.019449106 | 0 | 0.027573213 |
| cov2_5_7_8_9_10_11 | 37.6252 | -464.489 | 0.4071641 | 0 | 0            | 0 | 0.022666784 |
| cov1_2_5_7_8_9_10  | 37.6332 | -464.493 | 0.4072825 | 0 | -0.010335998 | 0 | 0.028533626 |
| cov1_2_3_5_6_7_10  | 37.6335 | -464.493 | 0.4124346 | 0 | -0.14401148  | 0 | 0.022177226 |
| cov1_3_5_6_7_10_11 | 37.6927 | -464.523 | 0.4127169 | 0 | -0.13525803  | 0 | 0           |
| cov1_3_4_5_6_7_10  | 37.6993 | -464.526 | 0.4123316 | 0 | -0.13091806  | 0 | 0           |
| cov1_2_3_5_6_8_9   | 37.7027 | -464.528 | 0.4124576 | 0 | -0.15179046  | 0 | 0.019462801 |
| cov1_3_5_6_7_9_10  | 37.7068 | -464.53  | 0.4125868 | 0 | -0.12910069  | 0 | 0           |
| cov1_2_4_7_8_10_11 | 37.7161 | -464.534 | 0.4050493 | 0 | -0.097594503 | 0 | 0.073492042 |
| cov4_5_7_8_9_10_11 | 37.718  | -464.535 | 0.4073775 | 0 | 0            | 0 | 0           |
| cov1_5_7_8_9_10_11 | 37.719  | -464.536 | 0.4074774 | 0 | 0.000482866  | 0 | 0           |
| cov1_4_5_7_8_10_11 | 37.7198 | -464.536 | 0.40744   | 0 | -0.000294679 | 0 | 0           |
| cov1_2_4_5_7_8_9   | 37.7266 | -464.54  | 0.405613  | 0 | -0.037486487 | 0 | 0.051039175 |
| cov1_3_5_6_8_9_11  | 37.7331 | -464.543 | 0.4127297 | 0 | -0.14664586  | 0 | 0           |
| cov1_3_4_6_8_9_11  | 37.7405 | -464.547 | 0.4125937 | 0 | -0.16737471  | 0 | 0           |
| cov1_3_4_5_6_8_9   | 37.7416 | -464.547 | 0.4121671 | 0 | -0.14105728  | 0 | 0           |
| cov1_2_4_7_8_9_10  | 37.7424 | -464.548 | 0.4049062 | 0 | -0.089015334 | 0 | 0.074773154 |
| cov1_4_5_7_8_9_10  | 37.7552 | -464.554 | 0.4072827 | 0 | 0.011337921  | 0 | 0           |
| cov1_3_4_6_7_10_11 | 37.7553 | -464.554 | 0.4129238 | 0 | -0.16694963  | 0 | 0           |
| cov1_2_3_4_6_7_9   | 37.7682 | -464.56  | 0.410389  | 0 | -0.17871076  | 0 | 0.048456562 |
| cov1_4_6_7_8_10_11 | 37.7705 | -464.562 | 0.4069401 | 0 | -0.12809625  | 0 | 0           |
| cov1_3_4_6_7_9_10  | 37.773  | -464.563 | 0.4128099 | 0 | -0.16070333  | 0 | 0           |
| cov1_2_3_6_8_9_11  | 37.7802 | -464.566 | 0.4139924 | 0 | -0.1947782   | 0 | 0.01620127  |
| cov2_4_5_7_8_9_11  | 37.7869 | -464.57  | 0.4059134 | 0 | 0            | 0 | 0.030564149 |
| cov1_4_6_7_8_9_10  | 37.7929 | -464.573 | 0.4067511 | 0 | -0.12015019  | 0 | 0           |
| cov1_2_3_6_7_10_11 | 37.7937 | -464.573 | 0.4143772 | 0 | -0.1967554   | 0 | 0.01823736  |
| cov1_2_3_6_7_9_10  | 37.8066 | -464.58  | 0.4143097 | 0 | -0.19204841  | 0 | 0.018937472 |
| cov1_2_5_7_8_9_11  | 37.8135 | -464.583 | 0.4072555 | 0 | -0.022750072 | 0 | 0.025310211 |
| cov1_3_6_7_9_10_11 | 37.8437 | -464.598 | 0.414446  | 0 | -0.18276941  | 0 | 0           |
| cov1_2_4_7_8_9_11  | 37.8772 | -464.615 | 0.4049309 | 0 | -0.09643407  | 0 | 0.070234063 |
| cov1_4_6_7_8_9_11  | 37.8891 | -464.621 | 0.4066828 | 0 | -0.12777701  | 0 | 0           |
| cov1_2_3_5_6_7_9   | 37.8983 | -464.626 | 0.412113  | 0 | -0.14419675  | 0 | 0.02002242  |
| cov1_4_5_7_8_9_11  | 37.9066 | -464.63  | 0.4071603 | 0 | -0.005227524 | 0 | 0           |
| cov1_3_5_6_7_9_11  | 37.939  | -464.646 | 0.4123709 | 0 | -0.13764478  | 0 | 0           |
| cov1_3_4_5_6_7_9   | 37.9451 | -464.649 | 0.4118873 | 0 | -0.13283997  | 0 | 0           |
| cov1_3_4_6_7_9_11  | 37.9768 | -464.665 | 0.4124363 | 0 | -0.16551357  | 0 | 0           |

|                    |         |          |           |   |              |   |              |
|--------------------|---------|----------|-----------|---|--------------|---|--------------|
| cov1_2_3_4_5_6_10  | 37.9909 | -464.672 | 0.4090687 | 0 | -0.11763213  | 0 | 0.042547931  |
| cov1_2_3_4_8_10_11 | 38.0012 | -464.677 | 0.4112155 | 0 | -0.11340705  | 0 | 0.046728595  |
| cov1_2_3_6_7_9_11  | 38.0278 | -464.69  | 0.413955  | 0 | -0.19424331  | 0 | 0.016384356  |
| cov1_2_3_4_8_9_10  | 38.0396 | -464.696 | 0.4110873 | 0 | -0.10361114  | 0 | 0.048317563  |
| cov1_2_3_4_5_8_10  | 38.0399 | -464.696 | 0.411042  | 0 | -0.10136486  | 0 | 0.047715585  |
| cov1_2_3_5_6_9_10  | 38.0527 | -464.703 | 0.4103437 | 0 | -0.10194566  | 0 | 0.024705715  |
| cov1_2_3_5_6_10_11 | 38.0534 | -464.703 | 0.4103896 | 0 | -0.10174918  | 0 | 0.024881132  |
| cov3_4_6_7_8_10_11 | 38.0745 | -464.714 | 0.4090317 | 0 | 0            | 0 | 0            |
| cov1_2_4_5_6_8_10  | 38.0754 | -464.714 | 0.4062667 | 0 | -0.11705161  | 0 | 0.055638714  |
| cov3_4_7_8_9_10_11 | 38.0827 | -464.718 | 0.4085912 | 0 | 0            | 0 | 0            |
| cov2_3_4_7_8_10_11 | 38.0835 | -464.718 | 0.4082738 | 0 | 0            | 0 | 0.008048574  |
| cov1_2_4_5_6_7_10  | 38.111  | -464.732 | 0.4065451 | 0 | -0.11441955  | 0 | 0.053700275  |
| cov1_2_3_5_8_10_11 | 38.1144 | -464.734 | 0.4127704 | 0 | -0.088999842 | 0 | 0.022233592  |
| cov1_2_4_5_6_10_11 | 38.1289 | -464.741 | 0.4070327 | 0 | -0.11174254  | 0 | 0.050028018  |
| cov1_2_4_5_6_9_10  | 38.1292 | -464.741 | 0.4068885 | 0 | -0.10958933  | 0 | 0.050560062  |
| cov1_3_4_5_6_9_10  | 38.1441 | -464.748 | 0.4104946 | 0 | -0.08436873  | 0 | 0            |
| cov1_3_5_6_9_10_11 | 38.1441 | -464.748 | 0.4104647 | 0 | -0.08462728  | 0 | 0            |
| cov1_3_4_5_6_10_11 | 38.1459 | -464.749 | 0.4105667 | 0 | -0.084857213 | 0 | 0            |
| cov1_2_3_5_8_9_10  | 38.1553 | -464.754 | 0.4126562 | 0 | -0.078519103 | 0 | 0.023575833  |
| cov3_4_6_7_8_9_10  | 38.1721 | -464.762 | 0.4087495 | 0 | 0            | 0 | 0            |
| cov2_3_4_6_7_8_10  | 38.178  | -464.765 | 0.4086396 | 0 | 0            | 0 | 0.005229778  |
| cov1_3_4_5_8_10_11 | 38.1822 | -464.767 | 0.4127758 | 0 | -0.075988374 | 0 | 0            |
| cov1_3_5_8_9_10_11 | 38.1879 | -464.77  | 0.4130183 | 0 | -0.074865696 | 0 | 0            |
| cov1_2_3_8_9_10_11 | 38.202  | -464.777 | 0.4141315 | 0 | -0.12518796  | 0 | 0.019904657  |
| cov1_2_3_4_6_10_11 | 38.2096 | -464.781 | 0.4086658 | 0 | -0.16831921  | 0 | 0.062201076  |
| cov1_2_3_4_5_6_9   | 38.2125 | -464.783 | 0.4087218 | 0 | -0.12014214  | 0 | 0.041535854  |
| cov1_2_3_4_6_9_10  | 38.2128 | -464.783 | 0.4086407 | 0 | -0.17061935  | 0 | 0.06181859   |
| cov3_5_6_8_9_10_11 | 38.2139 | -464.783 | 0.4097851 | 0 | 0            | 0 | 0            |
| cov1_3_4_8_9_10_11 | 38.2143 | -464.784 | 0.4131341 | 0 | -0.096375487 | 0 | 0            |
| cov3_4_5_6_8_10_11 | 38.2179 | -464.785 | 0.4098398 | 0 | 0            | 0 | 0            |
| cov2_3_5_6_8_10_11 | 38.218  | -464.785 | 0.4098867 | 0 | 0            | 0 | -0.000449801 |
| cov1_2_5_6_8_10_11 | 38.2226 | -464.788 | 0.4082149 | 0 | -0.093023797 | 0 | 0.026313173  |
| cov2_3_5_6_8_9_10  | 38.2258 | -464.789 | 0.4097823 | 0 | 0            | 0 | -0.001922257 |
| cov3_4_5_6_8_9_10  | 38.2262 | -464.79  | 0.4096935 | 0 | 0            | 0 | 0            |
| cov2_3_4_5_6_8_10  | 38.2305 | -464.792 | 0.4099072 | 0 | 0            | 0 | -0.00214178  |
| cov1_3_4_5_8_9_10  | 38.2338 | -464.793 | 0.4126556 | 0 | -0.062957463 | 0 | 0            |
| cov1_2_5_6_8_9_10  | 38.2366 | -464.795 | 0.4080471 | 0 | -0.086751092 | 0 | 0.026933783  |
| cov1_2_6_7_8_10_11 | 38.2411 | -464.797 | 0.4096731 | 0 | -0.17807278  | 0 | 0.020366636  |
| cov1_2_5_6_7_10_11 | 38.2437 | -464.798 | 0.4083589 | 0 | -0.091014821 | 0 | 0.026358235  |
| cov1_2_3_4_8_9_11  | 38.2456 | -464.799 | 0.4108865 | 0 | -0.11181107  | 0 | 0.044141991  |
| cov1_2_5_6_9_10_11 | 38.2457 | -464.799 | 0.408387  | 0 | -0.089131057 | 0 | 0.026244141  |
| cov1_2_3_4_7_10_11 | 38.2475 | -464.8   | 0.4109561 | 0 | -0.11106628  | 0 | 0.048662861  |
| cov1_2_5_6_7_9_10  | 38.2518 | -464.802 | 0.4082239 | 0 | -0.085988995 | 0 | 0.02683285   |
| cov1_2_6_7_8_9_10  | 38.2609 | -464.807 | 0.4095707 | 0 | -0.17189347  | 0 | 0.021128651  |
| cov3_4_6_7_8_9_11  | 38.2659 | -464.809 | 0.4084955 | 0 | 0            | 0 | 0            |
| cov2_3_4_7_8_9_10  | 38.2679 | -464.81  | 0.4080515 | 0 | 0            | 0 | -0.005205277 |
| cov1_2_4_6_8_10_11 | 38.2697 | -464.811 | 0.4054475 | 0 | -0.17484201  | 0 | 0.07639276   |

|                    |         |          |           |   |              |   |              |
|--------------------|---------|----------|-----------|---|--------------|---|--------------|
| cov1_2_3_4_5_7_10  | 38.2708 | -464.812 | 0.4107658 | 0 | -0.091013542 | 0 | 0.046808416  |
| cov2_3_4_7_8_9_11  | 38.2754 | -464.814 | 0.4078277 | 0 | 0            | 0 | 0.006494529  |
| cov1_2_3_4_7_9_10  | 38.2772 | -464.815 | 0.410836  | 0 | -0.10242393  | 0 | 0.050072035  |
| cov1_2_4_6_8_9_10  | 38.283  | -464.818 | 0.4052879 | 0 | -0.16928268  | 0 | 0.077322164  |
| cov1_2_3_5_6_9_11  | 38.2837 | -464.818 | 0.4101327 | 0 | -0.10418619  | 0 | 0.022555739  |
| cov1_4_7_8_9_10_11 | 38.2871 | -464.82  | 0.4069042 | 0 | -0.065151444 | 0 | 0            |
| cov1_2_4_5_6_8_9   | 38.2877 | -464.82  | 0.4060191 | 0 | -0.1195995   | 0 | 0.054217894  |
| cov1_2_3_4_5_8_9   | 38.292  | -464.822 | 0.410723  | 0 | -0.10344803  | 0 | 0.046598119  |
| cov1_6_7_8_9_10_11 | 38.3022 | -464.827 | 0.4096478 | 0 | -0.16228732  | 0 | 0            |
| cov1_4_5_6_8_10_11 | 38.3178 | -464.835 | 0.4079859 | 0 | -0.076546619 | 0 | 0            |
| cov1_2_4_5_6_7_9   | 38.3226 | -464.838 | 0.406295  | 0 | -0.11696002  | 0 | 0.05228152   |
| cov1_5_6_8_9_10_11 | 38.3226 | -464.838 | 0.408212  | 0 | -0.074529142 | 0 | 0            |
| cov1_2_4_6_7_10_11 | 38.3302 | -464.841 | 0.4056608 | 0 | -0.17368231  | 0 | 0.075677612  |
| cov3_5_6_7_9_10_11 | 38.3309 | -464.842 | 0.4095723 | 0 | 0            | 0 | 0            |
| cov2_3_5_6_7_10_11 | 38.3348 | -464.844 | 0.4096268 | 0 | 0            | 0 | 0.001654194  |
| cov3_4_5_6_7_10_11 | 38.3352 | -464.844 | 0.4096803 | 0 | 0            | 0 | 0            |
| cov1_2_4_5_6_9_11  | 38.337  | -464.845 | 0.4067988 | 0 | -0.11506117  | 0 | 0.048421411  |
| cov1_2_4_6_7_9_10  | 38.338  | -464.845 | 0.4055078 | 0 | -0.16916268  | 0 | 0.076401237  |
| cov1_4_5_6_8_9_10  | 38.338  | -464.845 | 0.4077999 | 0 | -0.06837674  | 0 | 0            |
| cov1_2_3_5_7_10_11 | 38.3408 | -464.847 | 0.4123788 | 0 | -0.078754739 | 0 | 0.022998582  |
| cov1_4_5_6_7_10_11 | 38.3426 | -464.848 | 0.408195  | 0 | -0.074170978 | 0 | 0            |
| cov1_5_6_7_9_10_11 | 38.3442 | -464.848 | 0.408356  | 0 | -0.072494634 | 0 | 0            |
| cov2_3_5_6_7_9_10  | 38.3451 | -464.849 | 0.4095161 | 0 | 0            | 0 | 3.36E-05     |
| cov3_4_5_6_7_9_10  | 38.3451 | -464.849 | 0.4095245 | 0 | 0            | 0 | 0            |
| cov1_4_5_6_9_10_11 | 38.3453 | -464.849 | 0.4082734 | 0 | -0.071686121 | 0 | 0            |
| cov2_3_4_5_6_7_10  | 38.3501 | -464.851 | 0.409635  | 0 | 0            | 0 | -0.000176456 |
| cov1_2_6_7_8_9_11  | 38.3543 | -464.854 | 0.409438  | 0 | -0.17632368  | 0 | 0.018892705  |
| cov2_3_4_6_7_8_9   | 38.3551 | -464.854 | 0.408158  | 0 | 0            | 0 | 0.003958099  |
| cov1_4_5_6_7_9_10  | 38.3552 | -464.854 | 0.4080257 | 0 | -0.067331215 | 0 | 0            |
| cov1_3_4_5_6_9_11  | 38.3595 | -464.856 | 0.4101668 | 0 | -0.088896136 | 0 | 0            |
| cov1_2_3_5_8_9_11  | 38.3671 | -464.86  | 0.4125129 | 0 | -0.091189673 | 0 | 0.020057864  |
| cov1_2_3_5_7_9_10  | 38.3723 | -464.863 | 0.4123034 | 0 | -0.069513751 | 0 | 0.024169738  |
| cov1_2_3_4_6_9_11  | 38.3934 | -464.873 | 0.4083926 | 0 | -0.16680643  | 0 | 0.059397971  |
| cov1_2_4_6_9_10_11 | 38.4038 | -464.878 | 0.4061718 | 0 | -0.16891655  | 0 | 0.073379068  |
| cov1_3_4_5_7_10_11 | 38.4165 | -464.885 | 0.4124538 | 0 | -0.064940167 | 0 | 0            |
| cov1_3_4_5_8_9_11  | 38.4166 | -464.885 | 0.4123981 | 0 | -0.07973788  | 0 | 0            |
| cov1_3_5_7_9_10_11 | 38.4195 | -464.886 | 0.4126237 | 0 | -0.064099542 | 0 | 0            |
| cov2_3_4_5_8_9_10  | 38.4351 | -464.894 | 0.4101786 | 0 | 0            | 0 | 0.010718309  |
| cov2_3_4_5_8_10_11 | 38.4363 | -464.895 | 0.4102315 | 0 | 0            | 0 | 0.010755332  |
| cov1_2_5_6_8_9_11  | 38.4385 | -464.896 | 0.4080242 | 0 | -0.095697445 | 0 | 0.023942958  |
| cov1_2_4_6_8_9_11  | 38.4388 | -464.896 | 0.4053091 | 0 | -0.17308535  | 0 | 0.072985435  |
| cov2_3_5_8_9_10_11 | 38.4419 | -464.897 | 0.4106548 | 0 | 0            | 0 | 0.006323268  |
| cov2_3_5_6_9_10_11 | 38.448  | -464.9   | 0.4088066 | 0 | 0            | 0 | 0.007048576  |
| cov3_4_5_8_9_10_11 | 38.4482 | -464.9   | 0.4107667 | 0 | 0            | 0 | 0            |
| cov2_3_4_5_6_10_11 | 38.4523 | -464.903 | 0.4088093 | 0 | 0            | 0 | 0.008065524  |
| cov3_4_5_6_9_10_11 | 38.4548 | -464.904 | 0.4090824 | 0 | 0            | 0 | 0            |
| cov1_3_4_5_7_9_10  | 38.4575 | -464.905 | 0.4123404 | 0 | -0.053208627 | 0 | 0            |

|                    |         |          |           |   |              |   |              |
|--------------------|---------|----------|-----------|---|--------------|---|--------------|
| cov1_2_5_6_7_9_11  | 38.4595 | -464.906 | 0.4081683 | 0 | -0.093680468 | 0 | 0.023991023  |
| cov2_3_4_5_6_9_10  | 38.47   | -464.911 | 0.4087464 | 0 | 0            | 0 | 0.005371877  |
| cov1_2_3_7_9_10_11 | 38.4753 | -464.914 | 0.4140773 | 0 | -0.12362592  | 0 | 0.020082938  |
| cov1_3_4_7_9_10_11 | 38.4785 | -464.916 | 0.4129569 | 0 | -0.093335419 | 0 | 0            |
| cov1_2_3_4_7_9_11  | 38.4813 | -464.917 | 0.4106238 | 0 | -0.10947298  | 0 | 0.046141407  |
| cov3_4_5_6_8_9_11  | 38.4938 | -464.923 | 0.409274  | 0 | 0            | 0 | 0            |
| cov2_3_5_6_8_9_11  | 38.4939 | -464.923 | 0.4094818 | 0 | 0            | 0 | -0.003053491 |
| cov1_2_4_6_7_9_11  | 38.4979 | -464.925 | 0.4055232 | 0 | -0.17193166  | 0 | 0.072291316  |
| cov2_3_4_5_6_8_9   | 38.5016 | -464.927 | 0.4094166 | 0 | 0            | 0 | -0.003642728 |
| cov1_4_5_6_8_9_11  | 38.5105 | -464.932 | 0.4076748 | 0 | -0.081002235 | 0 | 0            |
| cov1_2_3_4_5_7_9   | 38.5158 | -464.934 | 0.4104399 | 0 | -0.092965917 | 0 | 0.045692924  |
| cov1_4_5_6_7_9_11  | 38.5361 | -464.944 | 0.4078837 | 0 | -0.078647471 | 0 | 0            |
| cov2_4_5_6_8_9_10  | 38.5409 | -464.947 | 0.4067283 | 0 | 0            | 0 | 0.014928088  |
| cov2_4_5_6_8_10_11 | 38.5445 | -464.949 | 0.4067897 | 0 | 0            | 0 | 0.01617274   |
| cov2_4_5_6_9_10_11 | 38.5487 | -464.951 | 0.4069411 | 0 | 0            | 0 | 0.015570664  |
| cov2_5_6_8_9_10_11 | 38.554  | -464.953 | 0.4072794 | 0 | 0            | 0 | 0.009485226  |
| cov2_4_5_6_7_9_10  | 38.5546 | -464.954 | 0.4070025 | 0 | 0            | 0 | 0.013886842  |
| cov2_4_5_6_7_10_11 | 38.5549 | -464.954 | 0.4070397 | 0 | 0            | 0 | 0.015620618  |
| cov2_5_6_7_9_10_11 | 38.5604 | -464.957 | 0.4074421 | 0 | 0            | 0 | 0.009921781  |
| cov4_5_6_8_9_10_11 | 38.5682 | -464.96  | 0.4072627 | 0 | 0            | 0 | 0            |
| cov4_5_6_7_9_10_11 | 38.5769 | -464.965 | 0.4074951 | 0 | 0            | 0 | 0            |
| cov2_3_6_7_8_10_11 | 38.5819 | -464.967 | 0.4130597 | 0 | 0            | 0 | -0.035389926 |
| cov1_2_3_5_7_9_11  | 38.5868 | -464.97  | 0.4121136 | 0 | -0.08083194  | 0 | 0.020840941  |
| cov2_3_4_5_7_9_10  | 38.5876 | -464.97  | 0.4099441 | 0 | 0            | 0 | 0.013704165  |
| cov2_3_4_5_7_10_11 | 38.5887 | -464.971 | 0.4099948 | 0 | 0            | 0 | 0.013843893  |
| cov1_3_4_6_9_10_11 | 38.594  | -464.973 | 0.410941  | 0 | -0.14204276  | 0 | 0            |
| cov2_3_5_7_9_10_11 | 38.5956 | -464.974 | 0.4104638 | 0 | 0            | 0 | 0.009018569  |
| cov3_4_5_6_7_9_11  | 38.6021 | -464.977 | 0.4091137 | 0 | 0            | 0 | 0            |
| cov2_3_5_6_7_9_11  | 38.6025 | -464.978 | 0.40922   | 0 | 0            | 0 | -0.00090361  |
| cov3_4_5_7_9_10_11 | 38.6092 | -464.981 | 0.4107035 | 0 | 0            | 0 | 0            |
| cov2_3_4_5_6_7_9   | 38.6125 | -464.983 | 0.4091506 | 0 | 0            | 0 | -0.001640026 |
| cov1_3_4_5_7_9_11  | 38.645  | -464.999 | 0.4120704 | 0 | -0.068572319 | 0 | 0            |
| cov2_4_7_8_9_10_11 | 38.6524 | -465.003 | 0.4039032 | 0 | 0            | 0 | 0.033576411  |
| cov2_4_6_7_8_10_11 | 38.6573 | -465.005 | 0.4041258 | 0 | 0            | 0 | 0.035700598  |
| cov1_2_7_8_9_10_11 | 38.6752 | -465.014 | 0.4093744 | 0 | -0.11915273  | 0 | 0.021693837  |
| cov2_3_7_8_9_10_11 | 38.6754 | -465.014 | 0.4129951 | 0 | 0            | 0 | -0.047327475 |
| cov2_3_6_7_8_9_10  | 38.6984 | -465.026 | 0.4131419 | 0 | 0            | 0 | -0.042082324 |
| cov2_3_4_5_6_9_11  | 38.7006 | -465.027 | 0.4084039 | 0 | 0            | 0 | 0.005741345  |
| cov2_3_4_5_8_9_11  | 38.7014 | -465.027 | 0.4098019 | 0 | 0            | 0 | 0.008559127  |
| cov1_2_3_4_5_10_11 | 38.7136 | -465.033 | 0.4091664 | 0 | -0.045231323 | 0 | 0.041838216  |
| cov1_2_3_4_5_9_10  | 38.7165 | -465.035 | 0.4091335 | 0 | -0.042986272 | 0 | 0.042297323  |
| cov2_4_6_7_8_9_10  | 38.7405 | -465.047 | 0.4041268 | 0 | 0            | 0 | 0.029584206  |
| cov1_2_3_6_9_10_11 | 38.7477 | -465.05  | 0.4132451 | 0 | -0.17989569  | 0 | 0.019516713  |
| cov1_2_3_5_9_10_11 | 38.7614 | -465.057 | 0.410274  | 0 | -0.032780698 | 0 | 0.02625561   |
| cov2_3_6_7_8_9_11  | 38.7622 | -465.057 | 0.4125766 | 0 | 0            | 0 | -0.036480486 |
| cov2_4_5_6_8_9_11  | 38.7787 | -465.066 | 0.4065163 | 0 | 0            | 0 | 0.013340814  |
| cov2_4_5_6_7_9_11  | 38.7887 | -465.071 | 0.4067669 | 0 | 0            | 0 | 0.012794588  |

|                    |         |          |           |   |              |   |              |
|--------------------|---------|----------|-----------|---|--------------|---|--------------|
| cov2_4_6_7_8_9_11  | 38.7907 | -465.072 | 0.4039023 | 0 | 0            | 0 | 0.032914858  |
| cov4_6_7_8_9_10_11 | 38.7972 | -465.075 | 0.4051163 | 0 | 0            | 0 | 0            |
| cov2_3_4_5_9_10_11 | 38.8038 | -465.078 | 0.4089822 | 0 | 0            | 0 | 0.024398447  |
| cov1_2_4_5_8_10_11 | 38.8058 | -465.079 | 0.4063877 | 0 | -0.048893912 | 0 | 0.053882041  |
| cov3_6_7_8_9_10_11 | 38.8213 | -465.087 | 0.4126621 | 0 | 0            | 0 | 0            |
| cov2_3_4_5_7_9_11  | 38.8448 | -465.099 | 0.4095673 | 0 | 0            | 0 | 0.011696921  |
| cov1_2_4_5_8_9_10  | 38.8457 | -465.099 | 0.406217  | 0 | -0.038151163 | 0 | 0.055366987  |
| cov1_2_4_5_7_10_11 | 38.8465 | -465.1   | 0.4066701 | 0 | -0.044820528 | 0 | 0.051989017  |
| cov1_3_4_5_9_10_11 | 38.8622 | -465.107 | 0.410605  | 0 | -0.014176084 | 0 | 0            |
| cov1_2_4_5_9_10_11 | 38.8657 | -465.109 | 0.4069988 | 0 | -0.038941846 | 0 | 0.049317395  |
| cov1_2_4_5_7_9_10  | 38.876  | -465.114 | 0.4065152 | 0 | -0.03563248  | 0 | 0.053271045  |
| cov1_4_6_8_9_10_11 | 38.884  | -465.118 | 0.4073434 | 0 | -0.13991116  | 0 | 0            |
| cov2_4_5_8_9_10_11 | 38.9044 | -465.129 | 0.4065527 | 0 | 0            | 0 | 0.033991569  |
| cov1_2_3_4_9_10_11 | 38.9143 | -465.134 | 0.4088325 | 0 | -0.095447647 | 0 | 0.060420297  |
| cov1_2_3_4_5_9_11  | 38.9254 | -465.139 | 0.4088728 | 0 | -0.049160807 | 0 | 0.040708011  |
| cov2_4_5_7_9_10_11 | 38.9292 | -465.141 | 0.4068179 | 0 | 0            | 0 | 0.033754392  |
| cov1_4_6_7_9_10_11 | 38.933  | -465.143 | 0.4075425 | 0 | -0.13901057  | 0 | 0            |
| cov1_2_5_8_9_10_11 | 38.9411 | -465.147 | 0.4079957 | 0 | -0.022963282 | 0 | 0.027683391  |
| cov1_2_5_7_9_10_11 | 38.9622 | -465.158 | 0.4081593 | 0 | -0.020779277 | 0 | 0.027734522  |
| cov1_2_4_8_9_10_11 | 38.9999 | -465.176 | 0.405511  | 0 | -0.10028381  | 0 | 0.074793535  |
| cov1_2_4_5_8_9_11  | 39.0026 | -465.178 | 0.4061869 | 0 | -0.052865101 | 0 | 0.052428432  |
| cov1_2_4_5_7_9_11  | 39.0437 | -465.198 | 0.4064681 | 0 | -0.048808772 | 0 | 0.050538816  |
| cov1_4_5_8_9_10_11 | 39.0524 | -465.203 | 0.4079144 | 0 | -0.004010701 | 0 | 0            |
| cov1_2_4_7_9_10_11 | 39.0614 | -465.207 | 0.4057489 | 0 | -0.098963915 | 0 | 0.07401642   |
| cov1_4_5_7_9_10_11 | 39.076  | -465.214 | 0.408146  | 0 | -0.001473948 | 0 | 0            |
| cov3_4_6_8_9_10_11 | 39.2507 | -465.302 | 0.4096099 | 0 | 0            | 0 | 0            |
| cov2_3_4_6_8_10_11 | 39.2521 | -465.302 | 0.409398  | 0 | 0            | 0 | 0.00696111   |
| cov2_3_4_8_9_10_11 | 39.2521 | -465.302 | 0.4091479 | 0 | 0            | 0 | 0.005143376  |
| cov2_3_4_6_8_9_10  | 39.3649 | -465.359 | 0.4094234 | 0 | 0            | 0 | 0.000626403  |
| cov1_2_6_8_9_10_11 | 39.3947 | -465.374 | 0.4102468 | 0 | -0.19142982  | 0 | 0.020231936  |
| cov1_2_6_7_9_10_11 | 39.4251 | -465.389 | 0.4104042 | 0 | -0.18985132  | 0 | 0.020255944  |
| cov2_3_4_7_9_10_11 | 39.4453 | -465.399 | 0.4088885 | 0 | 0            | 0 | 0.008056207  |
| cov2_3_4_6_7_10_11 | 39.4486 | -465.401 | 0.4091098 | 0 | 0            | 0 | 0.009397701  |
| cov3_4_6_7_9_10_11 | 39.4512 | -465.402 | 0.4094334 | 0 | 0            | 0 | 0            |
| cov2_3_4_6_8_9_11  | 39.454  | -465.403 | 0.408951  | 0 | 0            | 0 | 0.005050002  |
| cov2_3_4_6_7_9_10  | 39.5768 | -465.465 | 0.4091357 | 0 | 0            | 0 | 0.002649771  |
| cov2_3_4_6_7_9_11  | 39.6406 | -465.497 | 0.4086669 | 0 | 0            | 0 | 0.00754198   |
| cov2_3_6_8_9_10_11 | 39.7646 | -465.559 | 0.4138713 | 0 | 0            | 0 | -0.039852301 |
| cov1_3_4_5_6_7_8   | 39.8145 | -465.584 | 0.4169863 | 0 | -0.20997128  | 0 | 0            |
| cov1_3_5_6_7_8_11  | 39.8282 | -465.59  | 0.4179973 | 0 | -0.21649568  | 0 | 0            |
| cov2_3_4_6_9_10_11 | 39.8298 | -465.591 | 0.4073992 | 0 | 0            | 0 | 0.021427669  |
| cov1_2_3_5_6_7_8   | 39.8497 | -465.601 | 0.4178589 | 0 | -0.21518992  | 0 | 0.012275561  |
| cov1_2_3_4_5_7_8   | 39.8885 | -465.621 | 0.4154349 | 0 | -0.19775775  | 0 | 0.044216659  |
| cov1_2_3_6_7_8_11  | 39.906  | -465.629 | 0.4170316 | 0 | -0.19077741  | 0 | 0.013092012  |
| cov1_2_3_4_6_7_8   | 39.9256 | -465.639 | 0.41614   | 0 | -0.18012582  | 0 | 0.0221408    |
| cov1_3_4_6_7_8_11  | 39.9315 | -465.642 | 0.4169556 | 0 | -0.17996481  | 0 | 0            |
| cov1_3_4_5_7_8_11  | 39.9885 | -465.671 | 0.4169471 | 0 | -0.17605492  | 0 | 0            |

|                      |         |          |           |   |             |   |              |
|----------------------|---------|----------|-----------|---|-------------|---|--------------|
| cov2_4_6_8_9_10_11   | 39.9933 | -465.673 | 0.4043845 | 0 | 0           | 0 | 0.033834865  |
| cov2_3_6_7_9_10_11   | 40.0039 | -465.678 | 0.4137944 | 0 | 0           | 0 | -0.039370829 |
| cov1_2_3_5_7_8_11    | 40.014  | -465.683 | 0.4176968 | 0 | -0.18244273 | 0 | 0.012281845  |
| cov2_4_6_7_9_10_11   | 40.0279 | -465.69  | 0.4046175 | 0 | 0           | 0 | 0.033382155  |
| cov2_6_7_8_9_10_11   | 40.0398 | -465.696 | 0.4092233 | 0 | 0           | 0 | -0.031626822 |
| cov1_2_3_4_7_8_11    | 40.0951 | -465.724 | 0.4161041 | 0 | -0.14726291 | 0 | 0.020977951  |
| cov1_2_4_5_6_7_8     | 40.1415 | -465.747 | 0.4117486 | 0 | -0.1952393  | 0 | 0.050325008  |
| cov1_2_4_6_7_8_11    | 40.1554 | -465.754 | 0.4127422 | 0 | -0.18022963 | 0 | 0.037335787  |
| cov1_4_5_6_7_8_11    | 40.3104 | -465.832 | 0.413214  | 0 | -0.1616088  | 0 | 0            |
| cov1_2_5_6_7_8_11    | 40.3248 | -465.839 | 0.4141489 | 0 | -0.17011978 | 0 | 0.015626013  |
| cov1_2_4_5_7_8_11    | 40.3365 | -465.845 | 0.4116961 | 0 | -0.1571834  | 0 | 0.048427789  |
| cov1_2_3_4_5_6_8     | 40.5786 | -465.966 | 0.4164614 | 0 | -0.26737384 | 0 | 0.046085747  |
| cov1_3_4_5_6_8_11    | 40.6997 | -466.026 | 0.4180545 | 0 | -0.24124724 | 0 | 0            |
| cov1_2_3_5_6_8_11    | 40.7591 | -466.056 | 0.4190522 | 0 | -0.2440843  | 0 | 0.010396326  |
| cov1_2_3_4_5_6_7     | 40.7697 | -466.061 | 0.4162218 | 0 | -0.25824647 | 0 | 0.045265406  |
| cov1_2_3_4_5_8_11    | 40.8717 | -466.112 | 0.4165191 | 0 | -0.22196875 | 0 | 0.04391349   |
| cov1_2_3_4_6_8_11    | 40.8921 | -466.122 | 0.4173087 | 0 | -0.20192253 | 0 | 0.019099009  |
| cov1_3_4_5_6_7_11    | 40.8954 | -466.124 | 0.4177761 | 0 | -0.23169264 | 0 | 0            |
| cov1_2_3_5_6_7_11    | 40.9419 | -466.147 | 0.4186975 | 0 | -0.23513324 | 0 | 0.011115256  |
| cov1_2_3_4_6_7_11    | 41.0148 | -466.184 | 0.4169364 | 0 | -0.1997815  | 0 | 0.02137546   |
| cov1_2_3_4_5_7_11    | 41.0848 | -466.219 | 0.4162394 | 0 | -0.2102362  | 0 | 0.043221308  |
| cov1_2_3_4_5_6_11    | 41.1329 | -466.243 | 0.4148306 | 0 | -0.21367082 | 0 | 0.040444661  |
| cov1_2_4_5_6_8_11    | 41.2043 | -466.279 | 0.4121891 | 0 | -0.21824168 | 0 | 0.051528465  |
| cov1_2_4_5_6_7_11    | 41.2394 | -466.296 | 0.412466  | 0 | -0.21443049 | 0 | 0.049801823  |
| cov2_3_5_6_7_8_11    | 41.5372 | -466.445 | 0.4152054 | 0 | 0           | 0 | -0.023254229 |
| cov2_3_4_5_6_7_8     | 41.5482 | -466.45  | 0.4156834 | 0 | 0           | 0 | -0.030111173 |
| cov2_4_5_6_7_8_11    | 41.5599 | -466.456 | 0.4145822 | 0 | 0           | 0 | -0.022293867 |
| cov2_3_4_5_7_8_11    | 41.6126 | -466.483 | 0.4156706 | 0 | 0           | 0 | -0.035990028 |
| cov3_4_5_6_7_8_11    | 41.6135 | -466.483 | 0.4144904 | 0 | 0           | 0 | 0            |
| cov2_3_4_6_7_8_11    | 41.8601 | -466.606 | 0.414878  | 0 | 0           | 0 | -0.021668499 |
| cov2_3_4_5_6_8_11    | 42.8316 | -467.092 | 0.4167152 | 0 | 0           | 0 | -0.033138583 |
| cov2_3_4_5_6_7_11    | 42.844  | -467.098 | 0.4163216 | 0 | 0           | 0 | -0.03027122  |
| cov1_2_3_4_6_7_8_10  | 43.401  | -463.862 | 0.4100887 | 0 | -0.17059975 | 0 | 0.050351129  |
| cov1_2_3_5_6_7_8_10  | 43.5071 | -463.915 | 0.4116558 | 0 | -0.13254919 | 0 | 0.022189221  |
| cov1_3_5_6_7_8_10_11 | 43.5672 | -463.945 | 0.4119341 | 0 | -0.12363172 | 0 | 0            |
| cov1_3_4_5_6_7_8_10  | 43.5746 | -463.949 | 0.4115867 | 0 | -0.11928672 | 0 | 0            |
| cov1_3_5_6_7_8_9_10  | 43.5806 | -463.952 | 0.4118067 | 0 | -0.1176105  | 0 | 0            |
| cov1_3_4_6_7_8_10_11 | 43.6334 | -463.979 | 0.4121878 | 0 | -0.15555181 | 0 | 0            |
| cov1_3_4_6_7_8_9_10  | 43.6502 | -463.987 | 0.4120767 | 0 | -0.14944654 | 0 | 0            |
| cov1_2_3_4_6_7_8_9   | 43.6511 | -463.987 | 0.4096938 | 0 | -0.16724699 | 0 | 0.047868291  |
| cov1_2_3_6_7_8_10_11 | 43.6665 | -463.995 | 0.4135881 | 0 | -0.18489563 | 0 | 0.018284817  |
| cov1_2_3_6_7_8_9_10  | 43.6787 | -464.001 | 0.4135229 | 0 | -0.1803114  | 0 | 0.018959949  |
| cov1_3_6_7_8_9_10_11 | 43.7168 | -464.02  | 0.4136556 | 0 | -0.17086795 | 0 | 0            |
| cov1_2_3_5_6_7_8_9   | 43.7719 | -464.048 | 0.4113284 | 0 | -0.13270833 | 0 | 0.020029558  |
| cov1_3_5_6_7_8_9_11  | 43.8136 | -464.069 | 0.4115839 | 0 | -0.12599894 | 0 | 0            |
| cov1_3_4_5_6_7_8_9   | 43.8209 | -464.072 | 0.4111383 | 0 | -0.1211958  | 0 | 0            |
| cov1_3_4_6_7_8_9_11  | 43.8552 | -464.089 | 0.4116956 | 0 | -0.15410793 | 0 | 0            |



|                      |         |          |           |   |              |   |             |
|----------------------|---------|----------|-----------|---|--------------|---|-------------|
| cov1_2_3_6_7_8_9_11  | 43.9008 | -464.112 | 0.4131613 | 0 | -0.18237359  | 0 | 0.016426013 |
| cov1_2_3_4_7_8_10_11 | 43.9401 | -464.132 | 0.4101914 | 0 | -0.10945474  | 0 | 0.048262728 |
| cov1_2_3_4_5_7_8_10  | 43.9572 | -464.14  | 0.4100073 | 0 | -0.089033541 | 0 | 0.045967097 |
| cov1_2_3_4_7_8_9_10  | 43.9652 | -464.144 | 0.4100793 | 0 | -0.10149222  | 0 | 0.049546749 |
| cov1_2_4_5_6_7_8_10  | 43.9812 | -464.152 | 0.4058727 | 0 | -0.10264555  | 0 | 0.052789438 |
| cov1_2_3_5_7_8_10_11 | 44.0273 | -464.176 | 0.411566  | 0 | -0.076524186 | 0 | 0.022824238 |
| cov1_2_3_5_7_8_9_10  | 44.054  | -464.189 | 0.4114606 | 0 | -0.067936342 | 0 | 0.023888805 |
| cov3_5_6_7_8_9_10_11 | 44.0985 | -464.211 | 0.4090422 | 0 | 0            | 0 | 0           |
| cov2_3_5_6_7_8_10_11 | 44.1007 | -464.212 | 0.4090542 | 0 | 0            | 0 | 0.003311299 |
| cov1_3_4_5_7_8_10_11 | 44.1025 | -464.213 | 0.4116492 | 0 | -0.06274636  | 0 | 0           |
| cov3_4_5_6_7_8_10_11 | 44.1025 | -464.213 | 0.4091506 | 0 | 0            | 0 | 0           |
| cov1_3_5_7_8_9_10_11 | 44.105  | -464.214 | 0.4117964 | 0 | -0.061913629 | 0 | 0           |
| cov1_2_5_6_7_8_10_11 | 44.1056 | -464.215 | 0.4076106 | 0 | -0.079960285 | 0 | 0.026337216 |
| cov2_3_5_6_7_8_9_10  | 44.1081 | -464.216 | 0.4089478 | 0 | 0            | 0 | 0.001883187 |
| cov3_4_5_6_7_8_9_10  | 44.1086 | -464.216 | 0.409005  | 0 | 0            | 0 | 0           |
| cov2_3_4_5_6_7_8_10  | 44.1125 | -464.218 | 0.4089802 | 0 | 0            | 0 | 0.002546213 |
| cov1_2_5_6_7_8_9_10  | 44.1129 | -464.218 | 0.4074773 | 0 | -0.075065808 | 0 | 0.026787934 |
| cov1_3_4_5_7_8_9_10  | 44.1376 | -464.231 | 0.411535  | 0 | -0.051830773 | 0 | 0           |
| cov1_2_3_7_8_9_10_11 | 44.1656 | -464.245 | 0.4132822 | 0 | -0.12188698  | 0 | 0.019853668 |
| cov1_3_4_7_8_9_10_11 | 44.1678 | -464.246 | 0.4121609 | 0 | -0.091824536 | 0 | 0           |
| cov1_2_3_4_7_8_9_11  | 44.1758 | -464.25  | 0.4098483 | 0 | -0.10780777  | 0 | 0.045726685 |
| cov1_2_4_5_6_7_8_9   | 44.1934 | -464.259 | 0.4056192 | 0 | -0.10518102  | 0 | 0.051366304 |
| cov1_2_4_6_7_8_10_11 | 44.204  | -464.264 | 0.4049934 | 0 | -0.16214013  | 0 | 0.074928125 |
| cov1_2_3_4_5_7_8_9   | 44.2042 | -464.264 | 0.4096689 | 0 | -0.090905747 | 0 | 0.044835648 |
| cov1_4_5_6_7_8_10_11 | 44.2056 | -464.265 | 0.407481  | 0 | -0.062971609 | 0 | 0           |
| cov1_5_6_7_8_9_10_11 | 44.2058 | -464.265 | 0.407607  | 0 | -0.061446471 | 0 | 0           |
| cov1_2_4_6_7_8_9_10  | 44.2111 | -464.267 | 0.4048553 | 0 | -0.15772787  | 0 | 0.075621249 |
| cov1_4_5_6_7_8_9_10  | 44.2172 | -464.27  | 0.407314  | 0 | -0.056299547 | 0 | 0           |
| cov2_3_4_5_7_8_9_10  | 44.2603 | -464.292 | 0.4091822 | 0 | 0            | 0 | 0.013608251 |
| cov2_3_4_5_7_8_10_11 | 44.2615 | -464.293 | 0.4092364 | 0 | 0            | 0 | 0.013989424 |
| cov2_3_5_7_8_9_10_11 | 44.2679 | -464.296 | 0.4096907 | 0 | 0            | 0 | 0.009240259 |
| cov1_2_3_5_7_8_9_11  | 44.2756 | -464.3   | 0.4112898 | 0 | -0.078534743 | 0 | 0.020642636 |
| cov3_4_5_7_8_9_10_11 | 44.2822 | -464.303 | 0.409945  | 0 | 0            | 0 | 0           |
| cov1_2_3_4_6_8_10_11 | 44.3091 | -464.316 | 0.4111178 | 0 | -0.18727989  | 0 | 0.048410093 |
| cov1_2_3_4_5_6_8_10  | 44.3213 | -464.323 | 0.4109896 | 0 | -0.17796374  | 0 | 0.048036207 |
| cov1_2_5_6_7_8_9_11  | 44.3218 | -464.323 | 0.4074159 | 0 | -0.082619063 | 0 | 0.023963835 |
| cov1_2_3_4_6_8_9_10  | 44.3224 | -464.323 | 0.410998  | 0 | -0.18234664  | 0 | 0.049340008 |
| cov1_3_4_5_7_8_9_11  | 44.3334 | -464.329 | 0.4112545 | 0 | -0.066336518 | 0 | 0           |
| cov2_4_5_6_7_8_9_10  | 44.3362 | -464.33  | 0.406246  | 0 | 0            | 0 | 0.017200468 |
| cov2_4_5_6_7_8_10_11 | 44.3384 | -464.331 | 0.4062957 | 0 | 0            | 0 | 0.018588792 |
| cov2_5_6_7_8_9_10_11 | 44.3483 | -464.336 | 0.4067835 | 0 | 0            | 0 | 0.011941429 |
| cov3_4_5_6_7_8_9_11  | 44.3676 | -464.346 | 0.4085857 | 0 | 0            | 0 | 0           |
| cov2_3_5_6_7_8_9_11  | 44.3681 | -464.346 | 0.4086481 | 0 | 0            | 0 | 0.00076445  |
| cov1_2_4_6_7_8_9_11  | 44.372  | -464.348 | 0.4048499 | 0 | -0.16038024  | 0 | 0.071531456 |
| cov4_5_6_7_8_9_10_11 | 44.3724 | -464.348 | 0.4068597 | 0 | 0            | 0 | 0           |
| cov2_3_4_5_6_7_8_9   | 44.3747 | -464.349 | 0.4084911 | 0 | 0            | 0 | 0.001087407 |
| cov1_4_5_6_7_8_9_11  | 44.4    | -464.362 | 0.4071664 | 0 | -0.06745598  | 0 | 0           |

|                      |         |          |           |   |              |   |             |
|----------------------|---------|----------|-----------|---|--------------|---|-------------|
| cov1_2_3_5_6_8_10_11 | 44.4443 | -464.384 | 0.4128782 | 0 | -0.15708263  | 0 | 0.020886811 |
| cov1_2_3_5_6_8_9_10  | 44.4596 | -464.392 | 0.4127671 | 0 | -0.15143752  | 0 | 0.021631495 |
| cov1_3_4_5_6_8_10_11 | 44.4968 | -464.41  | 0.4127142 | 0 | -0.14630522  | 0 | 0           |
| cov1_3_5_6_8_9_10_11 | 44.509  | -464.416 | 0.4130431 | 0 | -0.14396674  | 0 | 0           |
| cov1_3_4_5_6_8_9_10  | 44.518  | -464.421 | 0.4125796 | 0 | -0.13884489  | 0 | 0           |
| cov2_3_4_5_7_8_9_11  | 44.5192 | -464.421 | 0.4087998 | 0 | 0            | 0 | 0.011842904 |
| cov1_2_4_5_7_8_10_11 | 44.5248 | -464.424 | 0.4059425 | 0 | -0.042687369 | 0 | 0.051180483 |
| cov1_3_4_6_8_9_10_11 | 44.5378 | -464.431 | 0.413052  | 0 | -0.16865958  | 0 | 0           |
| cov1_2_3_4_5_6_7_10  | 44.5382 | -464.431 | 0.410743  | 0 | -0.16948413  | 0 | 0.047278635 |
| cov1_2_3_4_6_7_10_11 | 44.5384 | -464.431 | 0.4108818 | 0 | -0.18604942  | 0 | 0.050194943 |
| cov1_2_3_4_6_7_9_10  | 44.5471 | -464.435 | 0.4107755 | 0 | -0.18193333  | 0 | 0.05092333  |
| cov1_2_4_5_7_8_9_10  | 44.5492 | -464.436 | 0.4057934 | 0 | -0.034099135 | 0 | 0.052312352 |
| cov1_2_3_4_6_8_9_11  | 44.5649 | -464.444 | 0.4107467 | 0 | -0.18485173  | 0 | 0.045726956 |
| cov1_2_3_6_8_9_10_11 | 44.5652 | -464.444 | 0.4144259 | 0 | -0.19732729  | 0 | 0.018119979 |
| cov2_4_5_6_7_8_9_11  | 44.5701 | -464.447 | 0.4060222 | 0 | 0            | 0 | 0.015779572 |
| cov1_2_3_4_5_6_8_9   | 44.5834 | -464.454 | 0.4106205 | 0 | -0.17918583  | 0 | 0.046840276 |
| cov2_4_5_7_8_9_10_11 | 44.5993 | -464.461 | 0.4060677 | 0 | 0            | 0 | 0.033835968 |
| cov1_2_5_7_8_9_10_11 | 44.635  | -464.479 | 0.4073821 | 0 | -0.019155322 | 0 | 0.027485138 |
| cov1_2_3_5_6_7_10_11 | 44.6526 | -464.488 | 0.4125234 | 0 | -0.14860764  | 0 | 0.021567716 |
| cov1_2_3_5_6_7_9_10  | 44.6625 | -464.493 | 0.4124235 | 0 | -0.1439196   | 0 | 0.022157419 |
| cov1_2_3_5_6_8_9_11  | 44.7107 | -464.517 | 0.4125772 | 0 | -0.15834364  | 0 | 0.018596347 |
| cov1_3_4_5_6_7_10_11 | 44.7133 | -464.519 | 0.4124248 | 0 | -0.1371154   | 0 | 0           |
| cov1_3_5_6_7_9_10_11 | 44.7214 | -464.523 | 0.4126848 | 0 | -0.13507181  | 0 | 0           |
| cov1_2_4_5_7_8_9_11  | 44.7243 | -464.524 | 0.4057317 | 0 | -0.046652305 | 0 | 0.049708446 |
| cov1_3_4_5_6_7_9_10  | 44.7281 | -464.526 | 0.4122991 | 0 | -0.13072043  | 0 | 0           |
| cov1_3_4_5_6_8_9_11  | 44.7429 | -464.533 | 0.4122856 | 0 | -0.14929008  | 0 | 0           |
| cov1_2_4_7_8_9_10_11 | 44.7445 | -464.534 | 0.4050135 | 0 | -0.097361689 | 0 | 0.073431526 |
| cov1_4_5_7_8_9_10_11 | 44.7471 | -464.535 | 0.4073772 | 0 | 3.15E-05     | 0 | 0           |
| cov1_3_4_6_7_9_10_11 | 44.7842 | -464.554 | 0.4129026 | 0 | -0.16682701  | 0 | 0           |
| cov1_2_3_4_6_7_9_11  | 44.7844 | -464.554 | 0.410507  | 0 | -0.1835825   | 0 | 0.047566963 |
| cov1_2_3_4_5_6_7_9   | 44.7935 | -464.559 | 0.4103696 | 0 | -0.17040967  | 0 | 0.046028208 |
| cov1_4_6_7_8_9_10_11 | 44.7954 | -464.56  | 0.4068453 | 0 | -0.12774025  | 0 | 0           |
| cov1_2_3_6_7_9_10_11 | 44.8228 | -464.573 | 0.4143887 | 0 | -0.19680874  | 0 | 0.018264325 |
| cov1_2_3_5_6_7_9_11  | 44.9126 | -464.618 | 0.4122145 | 0 | -0.14973964  | 0 | 0.019293569 |
| cov1_3_4_5_6_7_9_11  | 44.9538 | -464.639 | 0.4119902 | 0 | -0.13997931  | 0 | 0           |
| cov1_2_3_4_5_6_9_10  | 45.0187 | -464.671 | 0.4090123 | 0 | -0.11729171  | 0 | 0.042479078 |
| cov1_2_3_4_5_6_10_11 | 45.0192 | -464.671 | 0.4090667 | 0 | -0.11661413  | 0 | 0.042757995 |
| cov1_2_3_4_8_9_10_11 | 45.03   | -464.677 | 0.4112445 | 0 | -0.11357011  | 0 | 0.046745834 |
| cov1_2_3_4_5_8_10_11 | 45.0301 | -464.677 | 0.4112096 | 0 | -0.11161036  | 0 | 0.046208332 |
| cov1_2_3_4_5_8_9_10  | 45.0685 | -464.696 | 0.411079  | 0 | -0.10169945  | 0 | 0.047762876 |
| cov1_2_3_5_6_9_10_11 | 45.0815 | -464.703 | 0.4103414 | 0 | -0.10145669  | 0 | 0.024784076 |
| cov2_3_4_6_7_8_10_11 | 45.0893 | -464.707 | 0.4084746 | 0 | 0            | 0 | 0.011548568 |
| cov1_2_4_5_6_8_10_11 | 45.0907 | -464.707 | 0.4063695 | 0 | -0.12227598  | 0 | 0.054794303 |
| cov3_4_6_7_8_9_10_11 | 45.0973 | -464.71  | 0.4089076 | 0 | 0            | 0 | 0           |
| cov1_2_4_5_6_8_9_10  | 45.1022 | -464.713 | 0.4061989 | 0 | -0.11665133  | 0 | 0.055542914 |
| cov2_3_4_7_8_9_10_11 | 45.1041 | -464.714 | 0.4081378 | 0 | 0            | 0 | 0.008260692 |
| cov1_2_4_5_6_7_10_11 | 45.1316 | -464.728 | 0.4066267 | 0 | -0.11851359  | 0 | 0.053006889 |

|                      |         |          |           |   |              |   |              |
|----------------------|---------|----------|-----------|---|--------------|---|--------------|
| cov1_2_4_5_6_7_9_10  | 45.1378 | -464.731 | 0.4064795 | 0 | -0.11400124  | 0 | 0.053579917  |
| cov1_2_3_5_8_9_10_11 | 45.1432 | -464.733 | 0.4128033 | 0 | -0.089258355 | 0 | 0.022288854  |
| cov1_2_4_5_6_9_10_11 | 45.1556 | -464.74  | 0.4069676 | 0 | -0.11135977  | 0 | 0.049883678  |
| cov1_3_4_5_6_9_10_11 | 45.1731 | -464.748 | 0.4104954 | 0 | -0.084564756 | 0 | 0            |
| cov2_3_4_6_7_8_9_10  | 45.198  | -464.761 | 0.4084841 | 0 | 0            | 0 | 0.005345488  |
| cov1_3_4_5_8_9_10_11 | 45.2112 | -464.767 | 0.4127889 | 0 | -0.076075614 | 0 | 0            |
| cov1_2_3_4_6_9_10_11 | 45.2379 | -464.781 | 0.4086178 | 0 | -0.16814023  | 0 | 0.06218132   |
| cov1_2_3_4_5_6_9_11  | 45.2415 | -464.783 | 0.4087331 | 0 | -0.12004342  | 0 | 0.041569531  |
| cov3_4_5_6_8_9_10_11 | 45.2428 | -464.783 | 0.4097396 | 0 | 0            | 0 | 0            |
| cov2_3_5_6_8_9_10_11 | 45.243  | -464.783 | 0.4097974 | 0 | 0            | 0 | -0.000534501 |
| cov2_3_4_5_6_8_10_11 | 45.247  | -464.785 | 0.4098373 | 0 | 0            | 0 | 5.25E-05     |
| cov1_2_5_6_8_9_10_11 | 45.2493 | -464.786 | 0.4081511 | 0 | -0.092630015 | 0 | 0.026159813  |
| cov2_3_4_5_6_8_9_10  | 45.2549 | -464.789 | 0.4097957 | 0 | 0            | 0 | -0.002050658 |
| cov1_2_6_7_8_9_10_11 | 45.2695 | -464.797 | 0.4096378 | 0 | -0.17790408  | 0 | 0.020277652  |
| cov1_2_3_4_5_7_10_11 | 45.2701 | -464.797 | 0.4109143 | 0 | -0.10007571  | 0 | 0.045495044  |
| cov1_2_5_6_7_9_10_11 | 45.2705 | -464.797 | 0.408295  | 0 | -0.090634012 | 0 | 0.026206464  |
| cov1_2_3_4_5_8_9_11  | 45.2742 | -464.799 | 0.4108968 | 0 | -0.11457122  | 0 | 0.044950532  |
| cov1_2_3_4_7_9_10_11 | 45.2763 | -464.8   | 0.4109801 | 0 | -0.11120709  | 0 | 0.048680748  |
| cov2_3_4_6_7_8_9_11  | 45.285  | -464.804 | 0.408028  | 0 | 0            | 0 | 0.009680328  |
| cov1_2_4_6_8_9_10_11 | 45.2966 | -464.81  | 0.4053844 | 0 | -0.17453666  | 0 | 0.076285715  |
| cov1_2_4_5_6_8_9_11  | 45.2979 | -464.811 | 0.4061277 | 0 | -0.12557309  | 0 | 0.053162088  |
| cov1_2_3_4_5_7_9_10  | 45.2996 | -464.812 | 0.4107951 | 0 | -0.091276057 | 0 | 0.046845475  |
| cov1_2_4_5_6_7_9_11  | 45.3391 | -464.831 | 0.4063832 | 0 | -0.12186272  | 0 | 0.05142738   |
| cov1_4_5_6_8_9_10_11 | 45.3429 | -464.833 | 0.4078933 | 0 | -0.076207775 | 0 | 0            |
| cov1_2_4_6_7_9_10_11 | 45.3572 | -464.84  | 0.4055987 | 0 | -0.17338377  | 0 | 0.075572756  |
| cov2_3_5_6_7_9_10_11 | 45.3596 | -464.842 | 0.4095364 | 0 | 0            | 0 | 0.001567674  |
| cov3_4_5_6_7_9_10_11 | 45.36   | -464.842 | 0.409576  | 0 | 0            | 0 | 0            |
| cov2_3_4_5_6_7_10_11 | 45.3637 | -464.844 | 0.4095684 | 0 | 0            | 0 | 0.002244678  |
| cov1_4_5_6_7_9_10_11 | 45.3678 | -464.846 | 0.4081034 | 0 | -0.073829365 | 0 | 0            |
| cov1_2_3_5_7_9_10_11 | 45.3697 | -464.847 | 0.4124027 | 0 | -0.078958668 | 0 | 0.023039953  |
| cov2_3_4_5_6_7_9_10  | 45.3742 | -464.849 | 0.4095291 | 0 | 0            | 0 | -9.03E-05    |
| cov1_3_4_5_7_9_10_11 | 45.4456 | -464.885 | 0.4124598 | 0 | -0.064980234 | 0 | 0            |
| cov2_3_4_5_8_9_10_11 | 45.4641 | -464.894 | 0.4101765 | 0 | 0            | 0 | 0.010816672  |
| cov2_3_4_5_6_9_10_11 | 45.4767 | -464.9   | 0.4087018 | 0 | 0            | 0 | 0.008089724  |
| cov1_2_3_4_5_7_9_11  | 45.5081 | -464.916 | 0.4105953 | 0 | -0.10291858  | 0 | 0.044240699  |
| cov2_3_4_5_6_8_9_11  | 45.5225 | -464.923 | 0.409368  | 0 | 0            | 0 | -0.001898796 |
| cov2_4_5_6_8_9_10_11 | 45.567  | -464.945 | 0.4066812 | 0 | 0            | 0 | 0.016132588  |
| cov2_4_5_6_7_9_10_11 | 45.5778 | -464.951 | 0.4069278 | 0 | 0            | 0 | 0.015595715  |
| cov2_3_6_7_8_9_10_11 | 45.6074 | -464.966 | 0.4129732 | 0 | 0            | 0 | -0.035474303 |
| cov2_3_4_5_7_9_10_11 | 45.6166 | -464.97  | 0.409942  | 0 | 0            | 0 | 0.013909851  |
| cov2_3_4_5_6_7_9_11  | 45.6312 | -464.977 | 0.4090968 | 0 | 0            | 0 | 0.000340037  |
| cov2_4_6_7_8_9_10_11 | 45.6751 | -464.999 | 0.4039773 | 0 | 0            | 0 | 0.035625036  |
| cov1_2_3_4_5_9_10_11 | 45.7426 | -465.033 | 0.4091475 | 0 | -0.045255842 | 0 | 0.041952478  |
| cov1_2_4_5_8_9_10_11 | 45.8342 | -465.079 | 0.4063534 | 0 | -0.048634668 | 0 | 0.053818582  |
| cov1_2_4_5_7_9_10_11 | 45.875  | -465.099 | 0.4066276 | 0 | -0.044554785 | 0 | 0.051902502  |
| cov2_3_4_6_8_9_10_11 | 46.2746 | -465.299 | 0.4092693 | 0 | 0            | 0 | 0.006992481  |
| cov2_3_4_6_7_9_10_11 | 46.4708 | -465.397 | 0.4089773 | 0 | 0            | 0 | 0.009429001  |

|                        |         |          |           |   |              |   |              |
|------------------------|---------|----------|-----------|---|--------------|---|--------------|
| cov1_2_3_4_5_6_7_8     | 46.6758 | -465.5   | 0.4155722 | 0 | -0.2463707   | 0 | 0.0444266    |
| cov1_3_4_5_6_7_8_11    | 46.7966 | -465.56  | 0.4170854 | 0 | -0.22032392  | 0 | 0            |
| cov1_2_3_5_6_7_8_11    | 46.8389 | -465.581 | 0.4179664 | 0 | -0.22386989  | 0 | 0.011116927  |
| cov1_2_3_4_5_7_8_11    | 46.865  | -465.594 | 0.4155786 | 0 | -0.20919511  | 0 | 0.042484157  |
| cov1_2_3_4_6_7_8_11    | 46.9178 | -465.621 | 0.4162599 | 0 | -0.18829274  | 0 | 0.02075012   |
| cov1_2_4_5_6_7_8_11    | 47.1357 | -465.73  | 0.4118475 | 0 | -0.20297858  | 0 | 0.048909492  |
| cov1_2_3_4_5_6_8_11    | 47.5619 | -465.943 | 0.4166077 | 0 | -0.27616472  | 0 | 0.044444162  |
| cov1_2_3_4_5_6_7_11    | 47.7624 | -466.043 | 0.4163537 | 0 | -0.2661884   | 0 | 0.043807008  |
| cov2_3_4_5_6_7_8_11    | 48.5605 | -466.442 | 0.4156152 | 0 | 0            | 0 | -0.027559916 |
| cov1_2_3_4_5_6_7_8_10  | 50.4199 | -463.857 | 0.4100431 | 0 | -0.15706049  | 0 | 0.046391077  |
| cov1_2_3_4_6_7_8_10_11 | 50.4219 | -463.858 | 0.4101753 | 0 | -0.17446478  | 0 | 0.049616717  |
| cov1_2_3_4_6_7_8_9_10  | 50.43   | -463.862 | 0.4100738 | 0 | -0.17052534  | 0 | 0.050341817  |
| cov1_2_3_5_6_7_8_10_11 | 50.5268 | -463.911 | 0.4117391 | 0 | -0.13699907  | 0 | 0.021599521  |
| cov1_2_3_5_6_7_8_9_10  | 50.5361 | -463.915 | 0.411641  | 0 | -0.13243251  | 0 | 0.022164524  |
| cov1_3_4_5_6_7_8_10_11 | 50.5895 | -463.942 | 0.411675  | 0 | -0.12531059  | 0 | 0            |
| cov1_3_5_6_7_8_9_10_11 | 50.5959 | -463.945 | 0.4118999 | 0 | -0.12342655  | 0 | 0            |
| cov1_3_4_5_6_7_8_9_10  | 50.6033 | -463.949 | 0.4115512 | 0 | -0.11907343  | 0 | 0            |
| cov1_3_4_6_7_8_9_10_11 | 50.6622 | -463.978 | 0.4121594 | 0 | -0.15543806  | 0 | 0            |
| cov1_2_3_4_6_7_8_9_11  | 50.6679 | -463.981 | 0.4097954 | 0 | -0.17198789  | 0 | 0.046987424  |
| cov1_2_3_4_5_6_7_8_9   | 50.6756 | -463.985 | 0.4096575 | 0 | -0.15811569  | 0 | 0.045186749  |
| cov1_2_3_6_7_8_9_10_11 | 50.6955 | -463.995 | 0.4135974 | 0 | -0.18493806  | 0 | 0.018306351  |
| cov1_2_3_5_6_7_8_9_11  | 50.7869 | -464.041 | 0.4114247 | 0 | -0.13810449  | 0 | 0.019320674  |
| cov1_3_4_5_6_7_8_9_11  | 50.8305 | -464.063 | 0.4112362 | 0 | -0.1281662   | 0 | 0            |
| cov1_2_3_4_5_7_8_10_11 | 50.9613 | -464.128 | 0.4101433 | 0 | -0.097326529 | 0 | 0.044767565  |
| cov1_2_3_4_7_8_9_10_11 | 50.9691 | -464.132 | 0.4102072 | 0 | -0.10954685  | 0 | 0.048274482  |
| cov1_2_3_4_5_7_8_9_10  | 50.9862 | -464.14  | 0.4100268 | 0 | -0.089209275 | 0 | 0.045991898  |
| cov1_2_4_5_6_7_8_10_11 | 51.0023 | -464.148 | 0.4059437 | 0 | -0.1065816   | 0 | 0.052112712  |
| cov1_2_4_5_6_7_8_9_10  | 51.0078 | -464.151 | 0.405805  | 0 | -0.10221652  | 0 | 0.052666335  |
| cov1_2_3_5_7_8_9_10_11 | 51.0563 | -464.175 | 0.4115811 | 0 | -0.076652754 | 0 | 0.022850343  |
| cov2_3_5_6_7_8_9_10_11 | 51.1259 | -464.21  | 0.4089665 | 0 | 0            | 0 | 0.003228183  |
| cov3_4_5_6_7_8_9_10_11 | 51.1276 | -464.211 | 0.4090522 | 0 | 0            | 0 | 0            |
| cov2_3_4_5_6_7_8_10_11 | 51.1292 | -464.212 | 0.4089166 | 0 | 0            | 0 | 0.004706937  |
| cov1_3_4_5_7_8_9_10_11 | 51.1315 | -464.213 | 0.4116461 | 0 | -0.062725428 | 0 | 0            |
| cov1_2_5_6_7_8_9_10_11 | 51.1322 | -464.213 | 0.4075436 | 0 | -0.079579896 | 0 | 0.026200879  |
| cov2_3_4_5_6_7_8_9_10  | 51.137  | -464.216 | 0.4088709 | 0 | 0            | 0 | 0.002634316  |
| cov1_2_3_4_5_7_8_9_11  | 51.2018 | -464.248 | 0.4098132 | 0 | -0.10011076  | 0 | 0.043495242  |
| cov1_2_4_5_6_7_8_9_11  | 51.2105 | -464.253 | 0.4057042 | 0 | -0.10996505  | 0 | 0.05053579   |
| cov1_4_5_6_7_8_9_10_11 | 51.2306 | -464.263 | 0.4073885 | 0 | -0.062647777 | 0 | 0            |
| cov1_2_4_6_7_8_9_10_11 | 51.2309 | -464.263 | 0.4049293 | 0 | -0.16183343  | 0 | 0.074820556  |
| cov2_3_4_5_7_8_9_10_11 | 51.2891 | -464.292 | 0.4091771 | 0 | 0            | 0 | 0.014063012  |
| cov1_2_3_4_5_6_8_10_11 | 51.3372 | -464.316 | 0.4111061 | 0 | -0.18299036  | 0 | 0.047151099  |
| cov1_2_3_4_6_8_9_10_11 | 51.3382 | -464.316 | 0.4111053 | 0 | -0.18722482  | 0 | 0.048400894  |
| cov1_2_3_4_5_6_8_9_10  | 51.3504 | -464.322 | 0.4109844 | 0 | -0.17789305  | 0 | 0.048027198  |
| cov2_4_5_6_7_8_9_10_11 | 51.3615 | -464.328 | 0.4061861 | 0 | 0            | 0 | 0.018563453  |
| cov2_3_4_5_6_7_8_9_11  | 51.3959 | -464.345 | 0.4084462 | 0 | 0            | 0 | 0.00281036   |
| cov1_2_3_5_6_8_9_10_11 | 51.4734 | -464.384 | 0.4128692 | 0 | -0.15701745  | 0 | 0.020870411  |
| cov1_3_4_5_6_8_9_10_11 | 51.5256 | -464.41  | 0.4126831 | 0 | -0.14613208  | 0 | 0            |

|                            |         |          |           |   |              |   |             |
|----------------------------|---------|----------|-----------|---|--------------|---|-------------|
| cov1_2_4_5_7_8_9_10_11     | 51.553  | -464.424 | 0.4059008 | 0 | -0.042386152 | 0 | 0.051098042 |
| cov1_2_3_4_5_6_7_10_11     | 51.5588 | -464.427 | 0.4108415 | 0 | -0.17341653  | 0 | 0.046520168 |
| cov1_2_3_4_5_6_7_9_10      | 51.5672 | -464.431 | 0.4107338 | 0 | -0.16920809  | 0 | 0.047206377 |
| cov1_2_3_4_6_7_9_10_11     | 51.5674 | -464.431 | 0.4108656 | 0 | -0.18597872  | 0 | 0.05018112  |
| cov1_2_3_4_5_6_8_9_11      | 51.594  | -464.444 | 0.4107475 | 0 | -0.18507991  | 0 | 0.045794326 |
| cov1_2_3_5_6_7_9_10_11     | 51.6816 | -464.488 | 0.4125002 | 0 | -0.14848579  | 0 | 0.021546214 |
| cov1_3_4_5_6_7_9_10_11     | 51.7419 | -464.518 | 0.4123872 | 0 | -0.13691364  | 0 | 0           |
| cov1_2_3_4_5_6_7_9_11      | 51.8098 | -464.552 | 0.410476  | 0 | -0.17537063  | 0 | 0.045164092 |
| cov1_2_3_4_5_6_9_10_11     | 52.047  | -464.671 | 0.4090006 | 0 | -0.11647587  | 0 | 0.042716911 |
| cov1_2_3_4_5_8_9_10_11     | 52.059  | -464.677 | 0.4112363 | 0 | -0.11183434  | 0 | 0.046248465 |
| cov2_3_4_6_7_8_9_10_11     | 52.1121 | -464.703 | 0.408348  | 0 | 0            | 0 | 0.011578972 |
| cov1_2_4_5_6_8_9_10_11     | 52.1172 | -464.706 | 0.4062683 | 0 | -0.12172127  | 0 | 0.054560165 |
| cov1_2_4_5_6_7_9_10_11     | 52.1582 | -464.726 | 0.4065542 | 0 | -0.11810632  | 0 | 0.052859682 |
| cov2_3_4_5_6_8_9_10_11     | 52.2719 | -464.783 | 0.4097359 | 0 | 0            | 0 | 8.50E-05    |
| cov1_2_3_4_5_7_9_10_11     | 52.299  | -464.797 | 0.4109348 | 0 | -0.10023891  | 0 | 0.04552439  |
| cov2_3_4_5_6_7_9_10_11     | 52.3885 | -464.842 | 0.4094646 | 0 | 0            | 0 | 0.002285822 |
| cov1_2_3_4_5_6_7_8_11      | 53.6694 | -465.482 | 0.4156983 | 0 | -0.25421287  | 0 | 0.042990755 |
| cov1_2_3_4_5_6_7_8_10_11   | 57.441  | -463.853 | 0.4101292 | 0 | -0.16101385  | 0 | 0.045706234 |
| cov1_2_3_4_5_6_7_8_9_10    | 57.4489 | -463.857 | 0.410026  | 0 | -0.15691762  | 0 | 0.046362739 |
| cov1_2_3_4_6_7_8_9_10_11   | 57.4508 | -463.858 | 0.4101555 | 0 | -0.17442022  | 0 | 0.049619166 |
| cov1_2_3_5_6_7_8_9_10_11   | 57.5558 | -463.911 | 0.4117224 | 0 | -0.13687635  | 0 | 0.021572594 |
| cov1_3_4_5_6_7_8_9_10_11   | 57.618  | -463.942 | 0.4116233 | 0 | -0.12508924  | 0 | 0           |
| cov1_2_3_4_5_6_7_8_9_11    | 57.6925 | -463.979 | 0.409759  | 0 | -0.16295258  | 0 | 0.044345415 |
| cov1_2_3_4_5_7_8_9_10_11   | 57.9903 | -464.128 | 0.4101368 | 0 | -0.097451779 | 0 | 0.044825327 |
| cov1_2_4_5_6_7_8_9_10_11   | 58.0288 | -464.147 | 0.4058751 | 0 | -0.10620768  | 0 | 0.051965502 |
| cov2_3_4_5_6_7_8_9_10_11   | 58.1543 | -464.21  | 0.4088182 | 0 | 0            | 0 | 0.004752373 |
| cov1_2_3_4_5_6_8_9_10_11   | 58.3662 | -464.316 | 0.41109   | 0 | -0.18285451  | 0 | 0.047126342 |
| cov1_2_3_4_5_6_7_9_10_11   | 58.5877 | -464.427 | 0.4108205 | 0 | -0.173274    | 0 | 0.046488079 |
| cov1_2_3_4_5_6_7_8_9_10_11 | 64.4699 | -463.853 | 0.4101065 | 0 | -0.16085531  | 0 | 0.04567329  |

[illegible]



|   |             |   |              |             |   |              |              |
|---|-------------|---|--------------|-------------|---|--------------|--------------|
| 0 | 0           | 0 | 0            | 0           | 0 | 0            | 0            |
| 0 | 0           | 0 | 0            | 0           | 0 | 0            | 0            |
| 0 | 0           | 0 | -0.073542837 | 0           | 0 | 0            | 0            |
| 0 | 0           | 0 | -0.083237232 | 0           | 0 | 0            | 0            |
| 0 | 0           | 0 | 0            | 0           | 0 | 0            | 0            |
| 0 | 0.024636331 | 0 | -0.076712202 | 0           | 0 | 0            | 0            |
| 0 | 0           | 0 | -0.095992445 | 0           | 0 | 0            | 0            |
| 0 | 0           | 0 | -0.082734494 | 0           | 0 | 0            | -0.014423966 |
| 0 | 0           | 0 | 0            | 0           | 0 | 0            | 0            |
| 0 | 0           | 0 | -0.081251481 | 0           | 0 | 0            | 0            |
| 0 | 0           | 0 | 0            | 0           | 0 | 0            | -0.00220199  |
| 0 | 0           | 0 | -0.079262512 | 0           | 0 | -0.004057793 | 0            |
| 0 | 0           | 0 | -0.081779773 | 0           | 0 | 0            | 0            |
| 0 | 0           | 0 | -0.07286187  | 0           | 0 | 0            | 0            |
| 0 | 0           | 0 | -0.093700427 | 0           | 0 | 0            | 0            |
| 0 | 0           | 0 | -0.08128056  | 0           | 0 | 0            | -0.013725655 |
| 0 | 0           | 0 | -0.078549439 | 0           | 0 | -0.00298733  | 0            |
| 0 | 0           | 0 | 0            | 0           | 0 | 0            | 1.0762661    |
| 0 | 0           | 0 | 0            | 0           | 0 | 0            | 1.0962312    |
| 0 | 0.051789722 | 0 | 0            | 0           | 0 | 0            | 0            |
| 0 | 0.062990232 | 0 | 0            | 0           | 0 | 0            | 0            |
| 0 | 0.050360218 | 0 | 0            | 0           | 0 | 0            | 0            |
| 0 | 0.060871076 | 0 | 0            | 0           | 0 | 0            | 0            |
| 0 | 0.050782203 | 0 | 0            | 0           | 0 | -0.065998775 | 0            |
| 0 | 0.032297528 | 0 | 0            | 0           | 0 | 0.063258934  | 0            |
| 0 | 0.06567697  | 0 | 0            | 0           | 0 | 0            | 0            |
| 0 | 0.049246903 | 0 | 0            | 0           | 0 | -0.06459632  | 0            |
| 0 | 0.058816918 | 0 | 0            | 0           | 0 | 0            | -0.04894943  |
| 0 | 0           | 0 | -0.020500419 | 0           | 0 | 0.066445522  | 0            |
| 0 | 0           | 0 | 0            | 0           | 0 | 0.063147391  | 0            |
| 0 | 0           | 0 | 0            | -0.01896968 | 0 | 0.06509406   | 0            |
| 0 | 0           | 0 | 0            | 0           | 0 | 0.0645506    | 0            |
| 0 | 0           | 0 | 0            | 0           | 0 | 0            | 0            |
| 0 | 0           | 0 | 0            | 0           | 0 | 0.065518495  | 0            |
| 0 | 0           | 0 | 0            | 0           | 0 | 0.065224673  | 0.003219436  |
| 0 | 0           | 0 | 0            | 0           | 0 | -0.031938296 | 0            |
| 0 | 0.033149132 | 0 | 0            | 0           | 0 | 0            | 0            |
| 0 | 0.031521195 | 0 | 0            | 0           | 0 | 0            | 0            |
| 0 | 0           | 0 | 0            | 0           | 0 | 0            | 0            |
| 0 | 0.031332999 | 0 | -0.006401147 | 0           | 0 | 0            | 0            |
| 0 | 0.034114186 | 0 | 0            | 0.001778805 | 0 | 0            | 0            |
| 0 | 0           | 0 | 0            | 0           | 0 | -0.030156768 | 0            |
| 0 | 0           | 0 | -0.035582589 | 0           | 0 | 0            | 0            |
| 0 | 0           | 0 | 0            | 0           | 0 | -0.04301749  | 0            |
| 0 | 0           | 0 | 0            | 0           | 0 | 0            | 0            |
| 0 | 0           | 0 | 0            | 0           | 0 | 0            | 0            |
| 0 | 0           | 0 | 0            | 0           | 0 | 0            | 0.00097873   |



|   |             |   |              |   |              |              |              |              |
|---|-------------|---|--------------|---|--------------|--------------|--------------|--------------|
| 0 | 0           | 0 | -0.018924714 | 0 | 0            | 0            | 0            | 0            |
| 0 | 0           | 0 | 0            | 0 | 0            | 0            | 0            | 0            |
| 0 | 0           | 0 | 0            | 0 | 0            | 0            | 0            | 0.001267433  |
| 0 | 0           | 0 | 0            | 0 | 0            | -0.04254608  | 0            | 0            |
| 0 | 0           | 0 | 0            | 0 | -0.019758598 | 0            | 0            | 0            |
| 0 | 0           | 0 | 0            | 0 | 0            | 0            | 0            | 0            |
| 0 | 0           | 0 | 0            | 0 | -0.020352054 | 0            | 0            | 0            |
| 0 | 0           | 0 | -0.01972012  | 0 | 0            | 0            | 0            | 0            |
| 0 | 0           | 0 | 0            | 0 | 0            | 0            | 0            | 0            |
| 0 | 0           | 0 | -0.017359134 | 0 | -0.003919609 | 0            | 0            | 0            |
| 0 | 0           | 0 | -0.019035102 | 0 | 0            | 0            | 0            | 0.002322032  |
| 0 | 0           | 0 | 0            | 0 | 0            | 0            | 0            | -0.001516412 |
| 0 | 0           | 0 | 0            | 0 | -0.020083152 | 0            | 0            | 0.006182789  |
| 0 | 0           | 0 | 0            | 0 | 0            | 0            | 0            | 0.004663049  |
| 0 | 0           | 0 | 0            | 0 | 0            | 0            | 0            | 0            |
| 0 | 0           | 0 | 0            | 0 | -0.019506944 | 0            | 0            | 0            |
| 0 | 0           | 0 | 0            | 0 | -0.10677501  | 0            | 0            | 1.0714152    |
| 0 | 0           | 0 | 0            | 0 | 0            | -0.063723574 | 0            | 0            |
| 0 | 0           | 0 | 0            | 0 | 0            | -0.064568107 | 0            | 0            |
| 0 | 0           | 0 | 0            | 0 | 0            | -0.064479775 | 0            | 0.001780887  |
| 0 | 0           | 0 | 0            | 0 | 0            | -0.063205452 | 0            | 0            |
| 0 | 0           | 0 | 0            | 0 | 0            | -0.063122849 | 0            | 0.002135891  |
| 0 | 0           | 0 | 0            | 0 | 0            | 0            | 0            | 0.020033516  |
| 0 | 0.002642684 | 0 | 0            | 0 | 0            | 0            | 0            | 0.01893238   |
| 0 | 0.009565816 | 0 | 0            | 0 | 0            | 0            | 0            | 0            |
| 0 | 0           | 0 | 0            | 0 | 0            | 0            | 0            | 0            |
| 0 | 0           | 0 | 0            | 0 | 0            | 0            | 0            | 0            |
| 0 | 0           | 0 | 0            | 0 | 0            | 0            | 0            | 0.019892861  |
| 0 | 0           | 0 | 0            | 0 | 0            | 0            | 0            | 0            |
| 0 | 0           | 0 | 0            | 0 | 0            | 0            | 0            | 1.1283824    |
| 0 | 0           | 0 | 0            | 0 | 0            | 0            | 0            | 1.1280798    |
| 0 | 0.10227443  | 0 | 0            | 0 | 0            | 0            | 0            | 0            |
| 0 | 0.098424918 | 0 | 0            | 0 | 0            | 0            | 0            | 0            |
| 0 | 0.094164289 | 0 | 0            | 0 | 0            | 0            | 0            | -0.084920883 |
| 0 | 0.090400999 | 0 | 0            | 0 | 0            | 0            | 0            | -0.081065912 |
| 0 | 0           | 0 | 0            | 0 | 0            | -0.099321072 | 0            | 1.1794742    |
| 0 | 0           | 0 | 0            | 0 | -0.073576213 | 0            | -0.018886713 | 0            |
| 0 | 0           | 0 | 0            | 0 | -0.07851553  | 0            | 0            | 0            |
| 0 | 0           | 0 | 0            | 0 | -0.082457832 | 0            | 0            | 0.013032605  |
| 0 | 0.008240987 | 0 | 0            | 0 | -0.079665635 | 0            | 0            | 0            |
| 0 | 0           | 0 | 0.010776261  | 0 | -0.08863101  | 0            | 0            | 0            |
| 0 | 0           | 0 | 0            | 0 | -0.082374038 | 0            | 0            | 0            |
| 0 | 0           | 0 | 0            | 0 | -0.082489627 | 0            | -0.031437696 | 0.013288478  |
| 0 | 0           | 0 | 0            | 0 | -0.079632497 | 0            | -0.026551458 | 0            |
| 0 | 0           | 0 | -0.012715754 | 0 | -0.071309958 | 0            | -0.032002296 | 0            |
| 0 | 0.047543255 | 0 | 0            | 0 | 0            | 0            | 0            | 0            |
| 0 | 0.008301957 | 0 | 0            | 0 | -0.07900285  | 0            | -0.0354396   | 0            |

|   |              |   |              |   |              |   |              |   |              |
|---|--------------|---|--------------|---|--------------|---|--------------|---|--------------|
| 0 | 0            | 0 | 0            | 0 | -0.082394064 | 0 | -0.031737831 | 0 | 0            |
| 0 | 0            | 0 | 0            | 0 | -0.091868647 | 0 | 0            | 0 | 0.021076484  |
| 0 | 0            | 0 | -0.014155863 | 0 | -0.081761452 | 0 | 0            | 0 | 0            |
| 0 | 0            | 0 | 0            | 0 | -0.092795611 | 0 | 0            | 0 | 0            |
| 0 | 0.007309922  | 0 | 0            | 0 | -0.091878459 | 0 | 0            | 0 | 0            |
| 0 | -0.016854519 | 0 | 0            | 0 | -0.10806612  | 0 | 0            | 0 | 0.030025619  |
| 0 | 0            | 0 | -0.009870354 | 0 | -0.098683299 | 0 | 0            | 0 | 0.013094029  |
| 0 | 0            | 0 | -0.011580484 | 0 | -0.097348402 | 0 | 0            | 0 | 0            |
| 0 | -0.003246079 | 0 | -0.013431705 | 0 | -0.096067131 | 0 | 0            | 0 | 0            |
| 0 | -0.009906107 | 0 | 0            | 0 | -0.10783678  | 0 | 0            | 0 | 0            |
| 0 | 0            | 0 | 0            | 0 | 0            | 0 | 0            | 0 | 1.0889896    |
| 0 | 0            | 0 | -0.095110287 | 0 | 0            | 0 | 0            | 0 | 1.0569829    |
| 0 | 0            | 0 | -0.053147116 | 0 | 0            | 0 | -0.046941296 | 0 | 0            |
| 0 | 0.012474936  | 0 | -0.051136675 | 0 | 0            | 0 | -0.063528741 | 0 | 0            |
| 0 | 0            | 0 | -0.04701098  | 0 | 0            | 0 | -0.052056056 | 0 | 0            |
| 0 | 0            | 0 | -0.055950888 | 0 | 0            | 0 | -0.059165978 | 0 | 0            |
| 0 | 0            | 0 | -0.05520006  | 0 | 0            | 0 | -0.059424291 | 0 | 0.002192387  |
| 0 | 0.032072936  | 0 | 0            | 0 | 0            | 0 | -0.060079241 | 0 | 0            |
| 0 | 0            | 0 | 0            | 0 | 0            | 0 | 0            | 0 | 0            |
| 0 | 0            | 0 | 0            | 0 | 0            | 0 | 0            | 0 | 0.003244339  |
| 0 | 0            | 0 | -0.053214047 | 0 | 0            | 0 | 0            | 0 | 0            |
| 0 | 0.011862484  | 0 | -0.068269615 | 0 | 0            | 0 | 0            | 0 | 0            |
| 0 | 0            | 0 | -0.069515034 | 0 | 0            | 0 | 0            | 0 | 0.014950554  |
| 0 | 0            | 0 | 0            | 0 | 0            | 0 | -0.050051738 | 0 | 0            |
| 0 | 0            | 0 | -0.070826346 | 0 | 0            | 0 | 0            | 0 | 0            |
| 0 | 0.036567105  | 0 | 0            | 0 | 0            | 0 | -0.076341705 | 0 | 0            |
| 0 | 0.037538501  | 0 | 0            | 0 | 0            | 0 | 0            | 0 | 0            |
| 0 | 0            | 0 | 0            | 0 | 0            | 0 | -0.057921328 | 0 | 0.010488018  |
| 0 | 0            | 0 | 0            | 0 | 0            | 0 | -0.058034365 | 0 | 0            |
| 0 | 0.053242342  | 0 | 0            | 0 | 0            | 0 | -0.10408895  | 0 | 0            |
| 0 | 0.011952484  | 0 | -0.047626177 | 0 | 0            | 0 | 0            | 0 | 0            |
| 0 | 0            | 0 | -0.054848418 | 0 | 0            | 0 | 0            | 0 | 0            |
| 0 | 0            | 0 | -0.05381958  | 0 | 0            | 0 | 0            | 0 | 0.003175521  |
| 0 | 0.045578945  | 0 | 0            | 0 | 0            | 0 | -0.10277565  | 0 | -0.029816263 |
| 0 | 0            | 0 | 0            | 0 | 0            | 0 | 0            | 0 | 1.1279097    |
| 0 | 0            | 0 | 0            | 0 | 0            | 0 | -0.074676003 | 0 | 0.020821103  |
| 0 | 0            | 0 | 0            | 0 | 0            | 0 | 0            | 0 | 0.022844887  |
| 0 | 0.050989275  | 0 | 0            | 0 | 0            | 0 | 0            | 0 | 0            |
| 0 | 0            | 0 | 0            | 0 | 0            | 0 | -0.076106964 | 0 | 0            |
| 0 | 0            | 0 | 0            | 0 | 0            | 0 | 0            | 0 | 0            |
| 0 | 0.044006001  | 0 | 0            | 0 | 0            | 0 | 0            | 0 | -0.028413634 |
| 0 | -0.014483717 | 0 | -0.096266674 | 0 | 0            | 0 | 0            | 0 | 0.011287238  |
| 0 | -0.00774068  | 0 | -0.096454052 | 0 | 0            | 0 | 0            | 0 | 0            |
| 0 | 0            | 0 | 0            | 0 | -0.094086975 | 0 | 0            | 0 | 1.1021514    |
| 0 | 0            | 0 | 0            | 0 | -0.092046882 | 0 | 0            | 0 | 1.1022612    |
| 0 | 0.034917599  | 0 | 0            | 0 | 0            | 0 | 0            | 0 | 0.010387321  |
| 0 | 0.041901946  | 0 | 0            | 0 | 0            | 0 | 0            | 0 | 0            |

|   |             |   |              |   |              |   |             |   |              |
|---|-------------|---|--------------|---|--------------|---|-------------|---|--------------|
| 0 | 0.11819315  | 0 | 0            | 0 | 0            | 0 | 0           | 0 | 0            |
| 0 | 0           | 0 | 0            | 0 | -0.10932591  | 0 | 0.09433531  | 0 | 0            |
| 0 | 0.072293062 | 0 | 0            | 0 | -0.088452248 | 0 | 0           | 0 | 0            |
| 0 | 0.020561395 | 0 | 0            | 0 | -0.13349458  | 0 | 0.055198414 | 0 | 0            |
| 0 | 0.1133353   | 0 | 0            | 0 | 0            | 0 | 0           | 0 | 0            |
| 0 | 0           | 0 | 0            | 0 | -0.10398521  | 0 | 0.09384561  | 0 | 0            |
| 0 | 0           | 0 | 0            | 0 | -0.14468834  | 0 | 0.058811131 | 0 | 0            |
| 0 | 0           | 0 | 0            | 0 | -0.14082606  | 0 | 0.062328092 | 0 | 0            |
| 0 | 0           | 0 | 0            | 0 | -0.14070526  | 0 | 0.062909501 | 0 | 0            |
| 0 | 0.11037051  | 0 | 0            | 0 | 0            | 0 | 0           | 0 | -0.10649965  |
| 0 | 0           | 0 | 0            | 0 | -0.14007161  | 0 | 0.063607255 | 0 | 0            |
| 0 | 0           | 0 | -0.00101871  | 0 | -0.13988094  | 0 | 0.062336567 | 0 | 0            |
| 0 | 0           | 0 | 0            | 0 | -0.14078241  | 0 | 0.062371151 | 0 | -0.000108958 |
| 0 | 0.063893009 | 0 | 0            | 0 | -0.089140818 | 0 | 0           | 0 | -0.059691885 |
| 0 | 0.067944859 | 0 | 0            | 0 | -0.086448298 | 0 | 0           | 0 | 0            |
| 0 | 0.019240318 | 0 | 0            | 0 | -0.12982356  | 0 | 0.053508065 | 0 | 0            |
| 0 | 0           | 0 | 0            | 0 | 0            | 0 | 0           | 0 | 1.1012913    |
| 0 | 0.10559421  | 0 | 0            | 0 | 0            | 0 | 0           | 0 | -0.10133174  |
| 0 | 0           | 0 | 0            | 0 | -0.13676407  | 0 | 0.060270786 | 0 | 0            |
| 0 | 0           | 0 | 0            | 0 | -0.13940625  | 0 | 0.057799788 | 0 | 0            |
| 0 | 0.051547448 | 0 | 0            | 0 | 0            | 0 | 0.086011309 | 0 | 0            |
| 0 | 0           | 0 | -0.003308473 | 0 | -0.13382774  | 0 | 0.06022356  | 0 | 0            |
| 0 | 0           | 0 | 0            | 0 | -0.13625616  | 0 | 0.061137451 | 0 | 0            |
| 0 | 0           | 0 | 0            | 0 | -0.13673084  | 0 | 0.060315764 | 0 | 0.000567816  |
| 0 | 0.027216295 | 0 | 0            | 0 | -0.10514351  | 0 | 0           | 0 | 0            |
| 0 | 0.059600063 | 0 | 0            | 0 | -0.087185249 | 0 | 0           | 0 | -0.054969371 |
| 0 | 0.032975143 | 0 | 0            | 0 | -0.082647616 | 0 | 0           | 0 | 0            |
| 0 | 0.031356194 | 0 | 0.004378579  | 0 | -0.095404826 | 0 | 0           | 0 | 0            |
| 0 | 0.029698681 | 0 | 0            | 0 | -0.093788249 | 0 | 0           | 0 | 0            |
| 0 | 0           | 0 | -0.082159164 | 0 | 0            | 0 | 0           | 0 | 1.0906876    |
| 0 | 0.030817698 | 0 | 0            | 0 | -0.091554413 | 0 | 0           | 0 | 0            |
| 0 | 0           | 0 | 0            | 0 | 0            | 0 | 0           | 0 | 1.1012028    |
| 0 | 0           | 0 | -0.024825865 | 0 | -0.099013904 | 0 | 0           | 0 | 0            |
| 0 | 0.049901406 | 0 | 0            | 0 | 0            | 0 | 0.085831204 | 0 | 0            |
| 0 | 0           | 0 | -0.080681376 | 0 | 0            | 0 | 0           | 0 | 1.0912149    |
| 0 | 0           | 0 | 0            | 0 | -0.11611994  | 0 | 0           | 0 | 0            |
| 0 | 0           | 0 | -0.048407836 | 0 | 0            | 0 | 0.092288435 | 0 | 0            |
| 0 | 0           | 0 | 0            | 0 | -0.11291427  | 0 | 0           | 0 | 0            |
| 0 | 0           | 0 | 0            | 0 | -0.10603303  | 0 | 0           | 0 | 0            |
| 0 | 0           | 0 | 0            | 0 | -0.11274847  | 0 | 0           | 0 | 0            |
| 0 | 0           | 0 | 0            | 0 | -0.11288505  | 0 | 0           | 0 | 0.000286557  |
| 0 | 0.026161864 | 0 | 0            | 0 | -0.10105298  | 0 | 0           | 0 | 0            |
| 0 | 0           | 0 | 0            | 0 | -0.10480524  | 0 | 0           | 0 | 0            |
| 0 | 0.032175972 | 0 | 0            | 0 | -0.077755492 | 0 | 0           | 0 | 0            |
| 0 | 0           | 0 | 0            | 0 | -0.10379968  | 0 | 0           | 0 | -0.004365337 |
| 0 | 0           | 0 | 0            | 0 | -0.10313666  | 0 | 0           | 0 | 0            |
| 0 | 0           | 0 | -0.001905448 | 0 | -0.10157397  | 0 | 0           | 0 | 0            |

|   |             |   |              |   |              |   |             |              |
|---|-------------|---|--------------|---|--------------|---|-------------|--------------|
| 0 | 0           | 0 | 0            | 0 | -0.1032376   | 0 | 0           | 0            |
| 0 | 0.02792697  | 0 | 0            | 0 | -0.092229146 | 0 | 0           | 0            |
| 0 | 0.029505087 | 0 | 0.001958252  | 0 | -0.091379299 | 0 | 0           | 0            |
| 0 | 0           | 0 | 0            | 0 | -0.10323554  | 0 | 0           | 0            |
| 0 | 0           | 0 | -0.047812248 | 0 | 0            | 0 | 0.092172542 | 0            |
| 0 | 0           | 0 | -0.005015707 | 0 | -0.090451172 | 0 | 0           | 0            |
| 0 | 0           | 0 | 0            | 0 | -0.1036625   | 0 | 0           | 0            |
| 0 | 0           | 0 | -0.002344442 | 0 | -0.10133018  | 0 | 0           | 0            |
| 0 | 0           | 0 | 0            | 0 | -0.094618465 | 0 | 0           | 0            |
| 0 | 0           | 0 | 0            | 0 | -0.10360609  | 0 | 0           | 0.000392029  |
| 0 | 0           | 0 | -0.003233745 | 0 | -0.091755913 | 0 | 0           | 0            |
| 0 | 0           | 0 | -0.003291879 | 0 | -0.091848907 | 0 | 0           | -0.000616527 |
| 0 | 0           | 0 | 0            | 0 | -0.094540821 | 0 | 0           | -1.34E-05    |
| 0 | 0           | 0 | -0.076592336 | 0 | 0            | 0 | 0           | 0            |
| 0 | 0           | 0 | -0.02515643  | 0 | -0.094511959 | 0 | 0           | 0            |
| 0 | 0           | 0 | 0            | 0 | -0.1121743   | 0 | 0           | 0            |
| 0 | 0           | 0 | 0            | 0 | -0.10038233  | 0 | 0           | 0            |
| 0 | 0           | 0 | 0            | 0 | -0.1086371   | 0 | 0           | 0            |
| 0 | 0           | 0 | 0            | 0 | -0.10862637  | 0 | 0           | 0.00091328   |
| 0 | 0           | 0 | 0            | 0 | -0.10266296  | 0 | 0           | 0            |
| 0 | 0           | 0 | 0            | 0 | -0.10167165  | 0 | 0           | -0.003732057 |
| 0 | 0           | 0 | -0.003817425 | 0 | -0.097829139 | 0 | 0           | 0            |
| 0 | 0           | 0 | 0            | 0 | -0.098066596 | 0 | 0           | 0            |
| 0 | 0.043022043 | 0 | -0.028142085 | 0 | 0            | 0 | 0           | 0            |
| 0 | 0           | 0 | -0.074496423 | 0 | 0            | 0 | 0           | 0            |
| 0 | 0           | 0 | -0.006814982 | 0 | -0.086893677 | 0 | 0           | 0            |
| 0 | 0           | 0 | 0            | 0 | -0.098017221 | 0 | 0           | 0            |
| 0 | 0           | 0 | -0.004551743 | 0 | -0.094010012 | 0 | 0           | 0            |
| 0 | 0           | 0 | 0            | 0 | -0.098414143 | 0 | 0           | 0.000879948  |
| 0 | 0           | 0 | -0.005084861 | 0 | -0.08830662  | 0 | 0           | -0.000331832 |
| 0 | 0.051538897 | 0 | 0            | 0 | 0            | 0 | 0           | 0            |
| 0 | 0.041442051 | 0 | -0.027968331 | 0 | 0            | 0 | 0           | 0            |
| 0 | 0.051563272 | 0 | 0            | 0 | 0            | 0 | 0           | 0            |
| 0 | 0.052007091 | 0 | 0            | 0 | 0            | 0 | 0           | 0            |
| 0 | 0.076535167 | 0 | -0.076555916 | 0 | 0            | 0 | 0           | 0            |
| 0 | 0           | 0 | 0            | 0 | 0            | 0 | 0.085896573 | 0            |
| 0 | 0           | 0 | 0            | 0 | 0            | 0 | 0.087457632 | 0            |
| 0 | 0           | 0 | 0            | 0 | 0            | 0 | 0.085307386 | 0            |
| 0 | 0           | 0 | 0            | 0 | 0            | 0 | 0.087167505 | -0.005627498 |
| 0 | 0           | 0 | 0            | 0 | 0            | 0 | 0.086917995 | 0            |
| 0 | 0.049929026 | 0 | 0            | 0 | 0            | 0 | 0           | 0            |
| 0 | 0           | 0 | 0            | 0 | 0            | 0 | 0.08580191  | 0            |
| 0 | 0.049697176 | 0 | 0            | 0 | 0            | 0 | 0           | 0            |
| 0 | 0           | 0 | 0            | 0 | 0            | 0 | 0.087312434 | 0            |
| 0 | 0           | 0 | 0            | 0 | 0            | 0 | 0.08506235  | 0            |
| 0 | 0.072646507 | 0 | -0.075195404 | 0 | 0            | 0 | 0           | 0            |
| 0 | 0           | 0 | 0            | 0 | 0            | 0 | 0.08701786  | -0.005142261 |

|   |             |   |              |   |   |   |              |              |
|---|-------------|---|--------------|---|---|---|--------------|--------------|
| 0 | 0.068402966 | 0 | -0.076826797 | 0 | 0 | 0 | 0            | -0.07727052  |
| 0 | 0           | 0 | -0.046422141 | 0 | 0 | 0 | 0            | 0            |
| 0 | 0           | 0 | -0.044025359 | 0 | 0 | 0 | 0            | 0            |
| 0 | 0           | 0 | -0.045544321 | 0 | 0 | 0 | 0            | -0.010014706 |
| 0 | 0           | 0 | -0.044501687 | 0 | 0 | 0 | 0            | 0            |
| 0 | 0           | 0 | -0.045704607 | 0 | 0 | 0 | 0            | 0            |
| 0 | 0           | 0 | -0.043387034 | 0 | 0 | 0 | 0            | 0            |
| 0 | 0.06458695  | 0 | -0.075487836 | 0 | 0 | 0 | 0            | -0.072923233 |
| 0 | 0           | 0 | -0.044830674 | 0 | 0 | 0 | 0            | -0.009393891 |
| 0 | 0.036466078 | 0 | -0.062493598 | 0 | 0 | 0 | 0            | 0            |
| 0 | 0.03441832  | 0 | -0.062392955 | 0 | 0 | 0 | 0            | 0            |
| 0 | 0           | 0 | 0            | 0 | 0 | 0 | 0            | 0            |
| 0 | 0           | 0 | -0.094589455 | 0 | 0 | 0 | 0            | 0            |
| 0 | 0           | 0 | 0            | 0 | 0 | 0 | 0            | 0            |
| 0 | 0           | 0 | 0            | 0 | 0 | 0 | 0            | 0            |
| 0 | 0.028554616 | 0 | -0.07029993  | 0 | 0 | 0 | -0.011732036 | 0            |
| 0 | 0           | 0 | 0            | 0 | 0 | 0 | 0            | -0.003123344 |
| 0 | 0           | 0 | 0            | 0 | 0 | 0 | 0            | 0            |
| 0 | 0.025907105 | 0 | -0.077446266 | 0 | 0 | 0 | 0            | 0            |
| 0 | 0.11363482  | 0 | 0            | 0 | 0 | 0 | 0            | 0            |
| 0 | 0.023920546 | 0 | -0.083455964 | 0 | 0 | 0 | 0            | 0            |
| 0 | 0           | 0 | 0            | 0 | 0 | 0 | 0            | -0.008307849 |
| 0 | 0           | 0 | 0            | 0 | 0 | 0 | 0            | 0            |
| 0 | 0           | 0 | -0.10018533  | 0 | 0 | 0 | 0            | 0            |
| 0 | 0           | 0 | 0            | 0 | 0 | 0 | 0            | 0            |
| 0 | 0           | 0 | 0            | 0 | 0 | 0 | 0            | 0            |
| 0 | 0           | 0 | -0.076295268 | 0 | 0 | 0 | 0            | 0            |
| 0 | 0           | 0 | 0            | 0 | 0 | 0 | 0            | -0.00267232  |
| 0 | 0           | 0 | 0            | 0 | 0 | 0 | 0            | 0            |
| 0 | 0           | 0 | 0            | 0 | 0 | 0 | 0            | 0            |
| 0 | 0           | 0 | -0.092281781 | 0 | 0 | 0 | 0            | 0            |
| 0 | 0           | 0 | -0.076985664 | 0 | 0 | 0 | 0.008519696  | 0            |
| 0 | 0           | 0 | -0.074940233 | 0 | 0 | 0 | 0            | -0.008714677 |
| 0 | 0           | 0 | -0.098864523 | 0 | 0 | 0 | 0            | -0.017123104 |
| 0 | 0           | 0 | -0.073401766 | 0 | 0 | 0 | 0            | 0            |
| 0 | 0           | 0 | -0.082700535 | 0 | 0 | 0 | 0            | 0            |
| 0 | 0           | 0 | 0            | 0 | 0 | 0 | 0            | -0.002608969 |
| 0 | 0.026995323 | 0 | -0.070004556 | 0 | 0 | 0 | -0.010324029 | 0            |
| 0 | 0           | 0 | -0.093061712 | 0 | 0 | 0 | -0.012914195 | 0            |
| 0 | 0.057355247 | 0 | 0            | 0 | 0 | 0 | 0            | 1.0137717    |
| 0 | 0           | 0 | -0.081695349 | 0 | 0 | 0 | -0.002448206 | 0            |
| 0 | 0           | 0 | 0            | 0 | 0 | 0 | 0            | -0.008102902 |
| 0 | 0           | 0 | -0.095874859 | 0 | 0 | 0 | 0            | 0            |
| 0 | 0.022871673 | 0 | -0.08163991  | 0 | 0 | 0 | 0            | 0            |
| 0 | 0           | 0 | -0.082195512 | 0 | 0 | 0 | 0            | -0.014363656 |
| 0 | 0.10944418  | 0 | 0            | 0 | 0 | 0 | 0            | 0            |
| 0 | 0           | 0 | -0.097685184 | 0 | 0 | 0 | 0            | 0            |

|   |             |   |              |   |             |   |              |   |              |
|---|-------------|---|--------------|---|-------------|---|--------------|---|--------------|
| 0 | 0           | 0 | -0.080865643 | 0 | 0           | 0 | -0.002964905 | 0 | -0.014096004 |
| 0 | 0           | 0 | -0.079378667 | 0 | 0           | 0 | -0.003042499 | 0 | 0            |
| 0 | 0           | 0 | -0.075568141 | 0 | 0           | 0 | 0            | 0 | 0            |
| 0 | 0           | 0 | -0.09638419  | 0 | 0           | 0 | 0            | 0 | -0.016233653 |
| 0 | 0           | 0 | -0.076371904 | 0 | 0           | 0 | 0.00872596   | 0 | 0            |
| 0 | 0           | 0 | -0.074218325 | 0 | 0           | 0 | 0            | 0 | -0.00849267  |
| 0 | 0           | 0 | -0.080902962 | 0 | 0           | 0 | -0.001409066 | 0 | 0            |
| 0 | 0           | 0 | -0.091166168 | 0 | 0           | 0 | -0.011105511 | 0 | 0            |
| 0 | 0.11091384  | 0 | 0            | 0 | 0           | 0 | -0.068976492 | 0 | 0            |
| 0 | 0           | 0 | -0.080077095 | 0 | 0           | 0 | -0.001932599 | 0 | -0.013513302 |
| 0 | 0.1056617   | 0 | 0            | 0 | 0           | 0 | 0            | 0 | -0.098255076 |
| 0 | 0           | 0 | 0            | 0 | 0           | 0 | 0            | 0 | 1.1156405    |
| 0 | 0           | 0 | 0            | 0 | 0           | 0 | -0.066767025 | 0 | 1.1752618    |
| 0 | 0           | 0 | 0            | 0 | 0           | 0 | 0            | 0 | 1.1158316    |
| 0 | 0           | 0 | 0            | 0 | 0           | 0 | 0.052483232  | 0 | 1.0242052    |
| 0 | 0.10155366  | 0 | 0            | 0 | 0           | 0 | 0            | 0 | -0.093927459 |
| 0 | 0.11249161  | 0 | 0            | 0 | 0           | 0 | 0            | 0 | 0            |
| 0 | 0           | 0 | 0            | 0 | 0           | 0 | -0.065426048 | 0 | 1.1741632    |
| 0 | 0.10643705  | 0 | 0            | 0 | 0           | 0 | -0.067359777 | 0 | 0            |
| 0 | 0.10241932  | 0 | 0            | 0 | 0           | 0 | -0.068371964 | 0 | -0.094323669 |
| 0 | 0           | 0 | -0.018302873 | 0 | 0           | 0 | 0            | 0 | 1.0709725    |
| 0 | 0           | 0 | 0            | 0 | 0           | 0 | 0            | 0 | 1.0671347    |
| 0 | 0           | 0 | 0            | 0 | 0           | 0 | 0            | 0 | 1.075056     |
| 0 | 0           | 0 | 0            | 0 | -0.0187028  | 0 | 0            | 0 | 1.0746754    |
| 0 | 0.05935004  | 0 | 0            | 0 | 0           | 0 | 0            | 0 | 0            |
| 0 | 0.10762552  | 0 | 0            | 0 | 0           | 0 | 0            | 0 | 0            |
| 0 | 0.10437651  | 0 | 0            | 0 | 0           | 0 | 0            | 0 | -0.076479434 |
| 0 | 0           | 0 | 0            | 0 | 0           | 0 | 0            | 0 | 1.1442731    |
| 0 | 0           | 0 | 0            | 0 | 0           | 0 | 0            | 0 | 1.1437014    |
| 0 | 0.098046309 | 0 | 0            | 0 | 0           | 0 | -0.066778033 | 0 | -0.089684756 |
| 0 | 0.057342213 | 0 | 0            | 0 | 0           | 0 | 0            | 0 | 0            |
| 0 | 0.001281436 | 0 | 0            | 0 | 0           | 0 | 0            | 0 | 1.0948644    |
| 0 | 0.059146691 | 0 | 0            | 0 | 0           | 0 | -0.035418103 | 0 | 0            |
| 0 | 0.099598443 | 0 | 0            | 0 | 0           | 0 | 0            | 0 | -0.072071734 |
| 0 | 0.051878855 | 0 | 0            | 0 | 0           | 0 | -0.032155518 | 0 | 0            |
| 0 | 0.050413873 | 0 | 0            | 0 | 0           | 0 | -0.030295476 | 0 | 0            |
| 0 | 0.06441837  | 0 | 0            | 0 | 0           | 0 | 0.063357821  | 0 | 0            |
| 0 | 0.057155274 | 0 | 0            | 0 | 0           | 0 | -0.035344646 | 0 | 0            |
| 0 | 0.051634388 | 0 | 0            | 0 | 0           | 0 | 0            | 0 | 0            |
| 0 | 0.057975706 | 0 | 0            | 0 | 0           | 0 | 0.063958405  | 0 | -0.049877604 |
| 0 | 0.062757689 | 0 | 0            | 0 | 0           | 0 | 0            | 0 | 0            |
| 0 | 0.093528188 | 0 | 0            | 0 | 0           | 0 | 0            | 0 | 1.0347072    |
| 0 | 0.093120138 | 0 | 0            | 0 | 0.045694297 | 0 | 0            | 0 | 0            |
| 0 | 0.089738794 | 0 | 0            | 0 | 0           | 0 | 0            | 0 | 1.0386262    |
| 0 | 0.065298663 | 0 | 0            | 0 | 0           | 0 | 0            | 0 | 0            |
| 0 | 0.050682004 | 0 | 0            | 0 | 0           | 0 | -0.065339732 | 0 | 0            |
| 0 | 0.031908872 | 0 | 0            | 0 | 0           | 0 | 0.062537612  | 0 | 0            |

|   |             |   |              |   |              |              |   |              |
|---|-------------|---|--------------|---|--------------|--------------|---|--------------|
| 0 | 0.06509588  | 0 | 0            | 0 | 0            | 0            | 0 | 0            |
| 0 | 0.029291297 | 0 | -0.008441357 | 0 | 0            | 0.063894816  | 0 | 0            |
| 0 | 0.030881048 | 0 | 0            | 0 | 0            | 0.062181059  | 0 | 0            |
| 0 | 0.032745436 | 0 | 0            | 0 | 0.001557263  | 0.06325335   | 0 | 0            |
| 0 | 0           | 0 | -0.036218699 | 0 | 0            | 0.065257555  | 0 | 0            |
| 0 | 0.067067164 | 0 | 0.002603681  | 0 | 0            | 0            | 0 | 0            |
| 0 | 0.080929933 | 0 | 0            | 0 | 0.036527294  | 0            | 0 | -0.0714583   |
| 0 | 0.058540074 | 0 | 0            | 0 | 0            | 0            | 0 | -0.054943539 |
| 0 | 0.058233161 | 0 | 0            | 0 | 0            | 0            | 0 | -0.048670109 |
| 0 | 0           | 0 | -0.020206313 | 0 | 0            | 0.064265604  | 0 | 0            |
| 0 | 0.059124774 | 0 | 0.000573898  | 0 | 0            | 0            | 0 | -0.04915231  |
| 0 | 0           | 0 | -0.021115325 | 0 | 0            | 0.066719108  | 0 | 0            |
| 0 | 0           | 0 | -0.020144723 | 0 | -0.000737898 | 0.066415018  | 0 | 0            |
| 0 | 0           | 0 | -0.020467804 | 0 | 0            | 0.066426657  | 0 | 0.00035919   |
| 0 | 0           | 0 | 0            | 0 | 0            | -0.02120304  | 0 | 0            |
| 0 | 0           | 0 | 0            | 0 | -0.019104993 | 0.062851265  | 0 | 0            |
| 0 | 0           | 0 | 0            | 0 | -0.01963804  | 0.06422806   | 0 | 0            |
| 0 | 0           | 0 | 0            | 0 | 0            | 0.062514288  | 0 | 0            |
| 0 | 0           | 0 | 0            | 0 | 0            | 0.063116576  | 0 | 0            |
| 0 | 0           | 0 | 0            | 0 | 0            | 0.063170561  | 0 | -0.00196768  |
| 0 | 0           | 0 | 0            | 0 | -0.019301799 | 0.064885186  | 0 | 0.004413017  |
| 0 | 0           | 0 | 0            | 0 | -0.018756365 | 0.06520113   | 0 | 0            |
| 0 | 0.025346074 | 0 | -0.020952299 | 0 | 0            | 0            | 0 | 0            |
| 0 | 0           | 0 | 0            | 0 | 0            | 0            | 0 | 0.010116345  |
| 0 | 0           | 0 | 0            | 0 | 0            | 0.064695312  | 0 | 0            |
| 0 | 0           | 0 | 0            | 0 | 0            | 0            | 0 | 0            |
| 0 | 0           | 0 | 0            | 0 | 0            | 0.064411099  | 0 | 0.002982604  |
| 0 | 0           | 0 | 0            | 0 | 0            | 0            | 0 | 0            |
| 0 | 0           | 0 | 0            | 0 | 0            | -0.020119613 | 0 | 0            |
| 0 | 0           | 0 | 0            | 0 | 0            | -0.031078251 | 0 | 0            |
| 0 | 0.031258217 | 0 | 0            | 0 | 0            | 0            | 0 | 0            |
| 0 | 0           | 0 | 0            | 0 | 0            | -0.03196498  | 0 | 0            |
| 0 | 0           | 0 | 0            | 0 | 0            | -0.03194005  | 0 | 0.001028195  |
| 0 | 0.033337603 | 0 | 0            | 0 | 0.000655714  | 0            | 0 | 0            |
| 0 | 0.028882806 | 0 | -0.00720012  | 0 | 0            | 0            | 0 | 0            |
| 0 | 0           | 0 | 0            | 0 | 0            | 0            | 0 | 0.009922964  |
| 0 | 0.031548002 | 0 | 0            | 0 | 8.90E-05     | 0            | 0 | 0            |
| 0 | 0           | 0 | 0            | 0 | 0            | 0            | 0 | 0            |
| 0 | 0.032848342 | 0 | -0.011065927 | 0 | 0.01099947   | 0            | 0 | 0            |
| 0 | 0           | 0 | -0.034466165 | 0 | 0            | 0            | 0 | 0            |
| 0 | 0           | 0 | 0            | 0 | 0            | -0.030174499 | 0 | 0            |
| 0 | 0           | 0 | -0.051006732 | 0 | 0.024568879  | 0            | 0 | 0            |
| 0 | 0           | 0 | 0            | 0 | 0            | -0.030159873 | 0 | 0.001350907  |
| 0 | 0           | 0 | 0            | 0 | -0.076731219 | -0.038254672 | 0 | 1.1104548    |
| 0 | 0           | 0 | 0            | 0 | -0.081462053 | 0            | 0 | 1.0747       |
| 0 | 0           | 0 | -0.036651476 | 0 | 0            | 0            | 0 | 0            |
| 0 | 0           | 0 | -0.035668152 | 0 | 0            | 0            | 0 | -0.000627095 |

|   |              |   |              |   |              |   |              |   |              |
|---|--------------|---|--------------|---|--------------|---|--------------|---|--------------|
| 0 | 0            | 0 | 0            | 0 | 0            | 0 | -0.041360186 | 0 | 0.011205004  |
| 0 | 0            | 0 | 0            | 0 | 0            | 0 | -0.042533621 | 0 | 0            |
| 0 | 0            | 0 | 0            | 0 | 0            | 0 | -0.042651269 | 0 | 0            |
| 0 | 0            | 0 | 0            | 0 | 0            | 0 | 0            | 0 | 0            |
| 0 | 0            | 0 | 0            | 0 | 0            | 0 | 0            | 0 | 0.000939202  |
| 0 | 0            | 0 | -0.019991274 | 0 | 0            | 0 | 0            | 0 | 0            |
| 0 | 0            | 0 | 0            | 0 | -0.090731978 | 0 | 0            | 0 | 1.0839786    |
| 0 | 0            | 0 | 0            | 0 | -0.020416311 | 0 | 0            | 0 | 0            |
| 0 | 0            | 0 | -0.019291368 | 0 | 0            | 0 | 0            | 0 | -0.004282586 |
| 0 | 0            | 0 | -0.016679219 | 0 | -0.004670341 | 0 | 0            | 0 | 0            |
| 0 | 0            | 0 | 0            | 0 | 0            | 0 | -0.040888717 | 0 | 0.011272431  |
| 0 | 0            | 0 | 0            | 0 | -0.019125551 | 0 | 0            | 0 | 0            |
| 0 | 0            | 0 | 0            | 0 | 0            | 0 | -0.042170988 | 0 | 0            |
| 0 | 0            | 0 | 0            | 0 | 0            | 0 | 0            | 0 | 0            |
| 0 | 0            | 0 | 0            | 0 | -0.019741817 | 0 | 0            | 0 | -0.000228836 |
| 0 | 0            | 0 | 0            | 0 | 0            | 0 | 0            | 0 | -0.001424576 |
| 0 | 0            | 0 | 0            | 0 | -0.020793109 | 0 | 0            | 0 | 0.005927369  |
| 0 | 0            | 0 | 0            | 0 | -0.020221931 | 0 | 0            | 0 | 0            |
| 0 | 0            | 0 | -0.018479017 | 0 | -0.002522321 | 0 | 0            | 0 | 0            |
| 0 | 0            | 0 | -0.016706183 | 0 | -0.004730442 | 0 | 0            | 0 | 0.002933583  |
| 0 | -0.018142309 | 0 | 0            | 0 | -0.10774172  | 0 | 0            | 0 | 1.0905358    |
| 0 | 0            | 0 | -0.009699954 | 0 | -0.098437667 | 0 | 0            | 0 | 1.0693481    |
| 0 | 0            | 0 | 0            | 0 | 0            | 0 | -0.063794144 | 0 | 0            |
| 0 | 0            | 0 | 0            | 0 | 0            | 0 | -0.063708241 | 0 | 0.001754411  |
| 0 | 0            | 0 | -0.051545438 | 0 | 0            | 0 | -0.064210937 | 0 | 1.1287694    |
| 0 | 0            | 0 | 0            | 0 | 0            | 0 | 0            | 0 | 0.01973936   |
| 0 | 0            | 0 | 0            | 0 | 0            | 0 | 0            | 0 | 0            |
| 0 | 0            | 0 | 0            | 0 | 0            | 0 | 0            | 0 | 1.1286599    |
| 0 | 0.10195412   | 0 | 0            | 0 | 0            | 0 | 0            | 0 | 0            |
| 0 | 0            | 0 | 0            | 0 | 0            | 0 | -0.063757367 | 0 | 1.1462161    |
| 0 | 0.093837368  | 0 | 0            | 0 | 0            | 0 | 0            | 0 | -0.084739752 |
| 0 | 0            | 0 | -0.068639042 | 0 | 0            | 0 | 0            | 0 | 1.0848114    |
| 0 | 0.045072042  | 0 | 0            | 0 | 0            | 0 | -0.10509448  | 0 | 1.1362383    |
| 0 | 0            | 0 | 0            | 0 | 0            | 0 | -0.079245156 | 0 | 1.1727319    |
| 0 | 0            | 0 | -0.052568135 | 0 | 0            | 0 | 0            | 0 | 1.0705232    |
| 0 | 0            | 0 | 0            | 0 | 0            | 0 | 0            | 0 | 1.1050442    |
| 0 | 0.012386174  | 0 | 0            | 0 | -0.067840927 | 0 | -0.022716655 | 0 | 0            |
| 0 | 0            | 0 | 0            | 0 | -0.073889882 | 0 | -0.018523406 | 0 | 0.012515876  |
| 0 | 0            | 0 | 0            | 0 | -0.077584472 | 0 | 0            | 0 | 0.016949458  |
| 0 | 0.012934774  | 0 | 0            | 0 | -0.072825666 | 0 | 0            | 0 | 0            |
| 0 | 0            | 0 | 0            | 0 | -0.072446881 | 0 | -0.016289168 | 0 | 0            |
| 0 | 0            | 0 | 0            | 0 | -0.073716411 | 0 | -0.018711468 | 0 | 0            |
| 0 | 0            | 0 | 0.004523416  | 0 | -0.076743043 | 0 | -0.017778686 | 0 | 0            |
| 0 | 0            | 0 | 0.01465579   | 0 | -0.091090695 | 0 | 0            | 0 | 0.015487224  |
| 0 | 0.012320457  | 0 | 0.017672027  | 0 | -0.088722661 | 0 | 0            | 0 | 0            |
| 0 | 0            | 0 | 0            | 0 | -0.078039244 | 0 | 0            | 0 | 0            |
| 0 | 0            | 0 | 0.006971689  | 0 | -0.083052757 | 0 | 0            | 0 | 0            |



|   |              |   |              |   |              |   |              |   |              |
|---|--------------|---|--------------|---|--------------|---|--------------|---|--------------|
| 0 | 0.001830656  | 0 | 0            | 0 | -0.081851815 | 0 | 0            | 0 | 0.011356101  |
| 0 | 0.042602471  | 0 | 0            | 0 | 0            | 0 | 0            | 0 | 1.0431362    |
| 0 | 0            | 0 | 0.012659176  | 0 | -0.089831161 | 0 | 0            | 0 | 0            |
| 0 | 0.010610499  | 0 | 0            | 0 | -0.078853025 | 0 | 0            | 0 | 0            |
| 0 | 0            | 0 | 0            | 0 | -0.079037831 | 0 | -0.024006808 | 0 | 0.017397638  |
| 0 | 0.012373163  | 0 | 0            | 0 | -0.073807885 | 0 | -0.02970575  | 0 | 0            |
| 0 | 0            | 0 | -0.013495461 | 0 | -0.067849472 | 0 | -0.02625803  | 0 | 0            |
| 0 | 0            | 0 | -0.010249278 | 0 | -0.07361638  | 0 | -0.031518806 | 0 | 0.011352652  |
| 0 | 0            | 0 | 0            | 0 | -0.079364982 | 0 | -0.025153891 | 0 | 0            |
| 0 | 0.006940241  | 0 | -0.011185359 | 0 | -0.069894    | 0 | -0.034872536 | 0 | 0            |
| 0 | 0.001215833  | 0 | 0            | 0 | -0.081992917 | 0 | -0.03198786  | 0 | 0.012172132  |
| 0 | 0            | 0 | -0.012012677 | 0 | -0.071982868 | 0 | -0.031846021 | 0 | 0            |
| 0 | 0.010922285  | 0 | 0            | 0 | -0.077880294 | 0 | -0.03674011  | 0 | 0            |
| 0 | 0            | 0 | -0.010178631 | 0 | -0.083077455 | 0 | 0            | 0 | 0.019174167  |
| 0 | -0.006612668 | 0 | 0            | 0 | -0.09342619  | 0 | 0            | 0 | 0.026506831  |
| 0 | 0            | 0 | -0.011891509 | 0 | -0.082520511 | 0 | 0            | 0 | 0            |
| 0 | 0.005860418  | 0 | -0.013023085 | 0 | -0.080829642 | 0 | 0            | 0 | 0            |
| 0 | 0.000733179  | 0 | 0            | 0 | -0.092621686 | 0 | 0            | 0 | 0            |
| 0 | -0.017094482 | 0 | -0.010340584 | 0 | -0.099190936 | 0 | 0            | 0 | 0.028291308  |
| 0 | -0.015775796 | 0 | -0.095950916 | 0 | 0            | 0 | 0            | 0 | 1.0734633    |
| 0 | -0.010196816 | 0 | -0.011877221 | 0 | -0.097642398 | 0 | 0            | 0 | 0            |
| 0 | 0.018663388  | 0 | -0.046187464 | 0 | 0            | 0 | -0.050093935 | 0 | 0            |
| 0 | 0.057713173  | 0 | 0            | 0 | 0            | 0 | -0.062703956 | 0 | 0            |
| 0 | 0.029598694  | 0 | -0.048163439 | 0 | 0            | 0 | -0.068298727 | 0 | 0            |
| 0 | 0.0184668    | 0 | -0.036437609 | 0 | 0            | 0 | -0.054563838 | 0 | 0            |
| 0 | 0            | 0 | -0.047693636 | 0 | 0            | 0 | -0.043200703 | 0 | 0            |
| 0 | 0            | 0 | -0.052057243 | 0 | 0            | 0 | -0.04604918  | 0 | 0.009101869  |
| 0 | 0            | 0 | -0.053092546 | 0 | 0            | 0 | -0.046892901 | 0 | 0            |
| 0 | 0.02137262   | 0 | -0.049646571 | 0 | 0            | 0 | -0.065937431 | 0 | -0.016309655 |
| 0 | 0.03622531   | 0 | 0            | 0 | 0            | 0 | -0.048463757 | 0 | 0            |
| 0 | 0            | 0 | -0.047652146 | 0 | 0            | 0 | -0.05207394  | 0 | 0            |
| 0 | 0            | 0 | -0.046575504 | 0 | 0            | 0 | -0.052062693 | 0 | 0.003269064  |
| 0 | 0.050310389  | 0 | 0            | 0 | 0            | 0 | -0.061764341 | 0 | -0.035392104 |
| 0 | 0.02170526   | 0 | -0.041054338 | 0 | 0            | 0 | 0            | 0 | 0            |
| 0 | 0            | 0 | -0.051261615 | 0 | 0            | 0 | 0            | 0 | 0.014018643  |
| 0 | 0            | 0 | -0.052419226 | 0 | 0            | 0 | 0            | 0 | 0            |
| 0 | 0.054950568  | 0 | 0            | 0 | 0            | 0 | -0.081789768 | 0 | 0            |
| 0 | 0.054327846  | 0 | 0            | 0 | 0            | 0 | 0            | 0 | 0            |
| 0 | 0            | 0 | 0            | 0 | 0            | 0 | -0.048061045 | 0 | 0.016469994  |
| 0 | 0.007327981  | 0 | -0.068214708 | 0 | 0            | 0 | 0            | 0 | 0.009042585  |
| 0 | 0.014189647  | 0 | -0.068287063 | 0 | 0            | 0 | 0            | 0 | 0            |
| 0 | 0            | 0 | 0            | 0 | 0            | 0 | -0.049052332 | 0 | 0            |
| 0 | 0.047429678  | 0 | 0            | 0 | 0            | 0 | -0.079471912 | 0 | -0.021832942 |
| 0 | 0.047326758  | 0 | 0            | 0 | 0            | 0 | 0            | 0 | -0.019588934 |
| 0 | 0.028374476  | 0 | -0.042281115 | 0 | 0            | 0 | 0            | 0 | 0            |
| 0 | 0.019800841  | 0 | -0.045086269 | 0 | 0            | 0 | 0            | 0 | -0.013476425 |
| 0 | 0.033622599  | 0 | 0            | 0 | 0            | 0 | 0            | 0 | 1.093426     |

|   |             |   |              |   |              |   |             |              |
|---|-------------|---|--------------|---|--------------|---|-------------|--------------|
| 0 | 0.10962445  | 0 | 0            | 0 | 0            | 0 | 0           | 0.99019951   |
| 0 | 0.063444945 | 0 | 0            | 0 | -0.088597861 | 0 | 0           | 1.0403393    |
| 0 | 0           | 0 | 0            | 0 | -0.13457515  | 0 | 0.054727388 | 1.0523229    |
| 0 | 0.10482282  | 0 | 0            | 0 | 0            | 0 | 0           | 0.99476488   |
| 0 | 0.059146302 | 0 | 0            | 0 | -0.086610019 | 0 | 0           | 1.0446606    |
| 0 | 0           | 0 | 0            | 0 | -0.13055193  | 0 | 0.052666967 | 1.054484     |
| 0 | 0.11998075  | 0 | 0            | 0 | 0            | 0 | 0.091136326 | 0            |
| 0 | 0           | 0 | 0            | 0 | -0.11224274  | 0 | 0           | 1.1020639    |
| 0 | 0           | 0 | 0            | 0 | -0.10276635  | 0 | 0           | 1.0960304    |
| 0 | 0           | 0 | 0            | 0 | -0.10346196  | 0 | 0           | 1.1029402    |
| 0 | 0           | 0 | -0.003018467 | 0 | -0.091501197 | 0 | 0           | 1.1014897    |
| 0 | 0           | 0 | 0            | 0 | -0.093930172 | 0 | 0           | 1.1022453    |
| 0 | 0.11497596  | 0 | 0            | 0 | 0            | 0 | 0.090615756 | 0            |
| 0 | 0           | 0 | 0            | 0 | -0.10794492  | 0 | 0           | 1.1021993    |
| 0 | 0.11290988  | 0 | 0            | 0 | 0            | 0 | 0.091981262 | -0.11201091  |
| 0 | 0           | 0 | 0            | 0 | -0.10061898  | 0 | 0           | 1.0962053    |
| 0 | 0           | 0 | 0            | 0 | -0.098246868 | 0 | 0           | 1.1028118    |
| 0 | 0           | 0 | -0.004834401 | 0 | -0.087904104 | 0 | 0           | 1.1012091    |
| 0 | 0.10796693  | 0 | 0            | 0 | 0            | 0 | 0.091409276 | -0.1066522   |
| 0 | 0.030895163 | 0 | 0            | 0 | -0.089586852 | 0 | 0.092496209 | 0            |
| 0 | 0.055805574 | 0 | 0            | 0 | -0.12135753  | 0 | 0.042568144 | 0            |
| 0 | 0.10074246  | 0 | 0            | 0 | -0.03462254  | 0 | 0           | 0            |
| 0 | 0.1177035   | 0 | 0            | 0 | 0            | 0 | 0           | 0            |
| 0 | 0           | 0 | 0            | 0 | -0.11153095  | 0 | 0.093306284 | 0            |
| 0 | 0.1176627   | 0 | 0            | 0 | 0            | 0 | 0           | 0            |
| 0 | 0.11088835  | 0 | -0.015425196 | 0 | 0            | 0 | 0           | 0            |
| 0 | 0.067948948 | 0 | -0.076290715 | 0 | 0            | 0 | 0           | 1.0255309    |
| 0 | 0.11826198  | 0 | 0            | 0 | 0            | 0 | 0           | 0            |
| 0 | 0           | 0 | 0            | 0 | 0            | 0 | 0.074420601 | 1.0292022    |
| 0 | 0           | 0 | -0.04528974  | 0 | 0            | 0 | 0           | 1.091615     |
| 0 | 0           | 0 | 0            | 0 | -0.10887928  | 0 | 0.094792484 | 0            |
| 0 | 0.046137284 | 0 | 0            | 0 | -0.12494216  | 0 | 0.046345802 | -0.04318123  |
| 0 | 0           | 0 | 0            | 0 | -0.10903904  | 0 | 0.093105335 | 0            |
| 0 | 0.030039306 | 0 | 0            | 0 | -0.084622448 | 0 | 0.091995057 | 0            |
| 0 | 0           | 0 | -0.005160953 | 0 | -0.1043559   | 0 | 0.094576775 | 0            |
| 0 | 0           | 0 | 0            | 0 | -0.10946365  | 0 | 0.094523261 | 0            |
| 0 | 0           | 0 | 0            | 0 | -0.10920835  | 0 | 0.094490892 | -0.002643808 |
| 0 | 0           | 0 | -0.08079263  | 0 | 0            | 0 | 0.092718568 | 0            |
| 0 | 0           | 0 | 0            | 0 | 0            | 0 | 0.074279578 | 1.0293295    |
| 0 | 0.069586548 | 0 | 0            | 0 | -0.093334214 | 0 | 0           | 0            |
| 0 | 0.064119051 | 0 | -0.074930714 | 0 | 0            | 0 | 0           | 1.0297409    |
| 0 | 0.072320238 | 0 | 0            | 0 | -0.088270545 | 0 | 0           | 0            |
| 0 | 0.071639131 | 0 | 0            | 0 | -0.089582815 | 0 | 0           | 0            |
| 0 | 0.07221283  | 0 | -0.001695442 | 0 | -0.087006457 | 0 | 0           | 0            |
| 0 | 0.088250053 | 0 | 0            | 0 | -0.04348819  | 0 | 0           | -0.084400317 |
| 0 | 0           | 0 | -0.044583513 | 0 | 0            | 0 | 0           | 1.0917744    |
| 0 | 0.023267786 | 0 | 0            | 0 | -0.12989689  | 0 | 0.058850462 | 0            |

|   |             |   |              |   |              |   |             |   |              |
|---|-------------|---|--------------|---|--------------|---|-------------|---|--------------|
| 0 | 0.020484574 | 0 | 0            | 0 | -0.13345065  | 0 | 0.055729524 | 0 | 0            |
| 0 | 0           | 0 | 0            | 0 | -0.10577859  | 0 | 0.092840904 | 0 | 0            |
| 0 | 0.01984052  | 0 | 0            | 0 | -0.1360774   | 0 | 0.053328662 | 0 | 0            |
| 0 | 0.021041798 | 0 | 0.003796278  | 0 | -0.13667916  | 0 | 0.055159162 | 0 | 0            |
| 0 | 0.11283948  | 0 | 0            | 0 | 0            | 0 | 0           | 0 | 0            |
| 0 | 0.097646414 | 0 | 0            | 0 | -0.030771953 | 0 | 0           | 0 | 0            |
| 0 | 0.11279715  | 0 | 0            | 0 | 0            | 0 | 0           | 0 | 0            |
| 0 | 0.10589924  | 0 | -0.015692875 | 0 | 0            | 0 | 0           | 0 | 0            |
| 0 | 0.051732543 | 0 | 0            | 0 | -0.11837313  | 0 | 0.041647131 | 0 | 0            |
| 0 | 0.10988565  | 0 | 0            | 0 | 0            | 0 | 0           | 0 | -0.10645638  |
| 0 | 0.10225055  | 0 | -0.017061377 | 0 | 0            | 0 | 0           | 0 | -0.10161166  |
| 0 | 0.10994968  | 0 | 0            | 0 | 0            | 0 | 0           | 0 | -0.11104532  |
| 0 | 0           | 0 | 0            | 0 | -0.10371706  | 0 | 0.092416175 | 0 | 0            |
| 0 | 0           | 0 | 0            | 0 | -0.10354174  | 0 | 0.094276223 | 0 | 0            |
| 0 | 0           | 0 | -0.007473163 | 0 | -0.09685327  | 0 | 0.094210931 | 0 | 0            |
| 0 | 0           | 0 | 0            | 0 | -0.14470611  | 0 | 0.058794953 | 0 | 0            |
| 0 | 0           | 0 | -0.00948493  | 0 | -0.13825312  | 0 | 0.05671552  | 0 | 0            |
| 0 | 0           | 0 | 0            | 0 | -0.14457569  | 0 | 0.059372098 | 0 | 0            |
| 0 | 0           | 0 | 0            | 0 | -0.10388613  | 0 | 0.093969708 | 0 | -0.002124291 |
| 0 | 0           | 0 | 0            | 0 | -0.14391345  | 0 | 0.060477687 | 0 | 0            |
| 0 | 0           | 0 | 0            | 0 | -0.14075007  | 0 | 0.062868274 | 0 | 0            |
| 0 | 0           | 0 | 0            | 0 | -0.14468726  | 0 | 0.058812449 | 0 | 3.05E-06     |
| 0 | 0           | 0 | -0.078685899 | 0 | 0            | 0 | 0.092483022 | 0 | 0            |
| 0 | 0           | 0 | -0.002723689 | 0 | -0.13842227  | 0 | 0.062233226 | 0 | 0            |
| 0 | 0           | 0 | 0            | 0 | -0.140522    | 0 | 0.062857086 | 0 | 0            |
| 0 | 0           | 0 | 0            | 0 | -0.14005029  | 0 | 0.064044025 | 0 | 0            |
| 0 | 0           | 0 | -0.001254451 | 0 | -0.13959748  | 0 | 0.062871988 | 0 | 0            |
| 0 | 0           | 0 | 0            | 0 | -0.1407068   | 0 | 0.062909754 | 0 | -0.000128559 |
| 0 | 0.11043613  | 0 | 0            | 0 | 0            | 0 | 0           | 0 | -0.10656281  |
| 0 | 0           | 0 | -0.00121767  | 0 | -0.13898071  | 0 | 0.063592129 | 0 | 0            |
| 0 | 0           | 0 | 0            | 0 | -0.14002327  | 0 | 0.063675642 | 0 | 0.000711354  |
| 0 | 0           | 0 | -0.001084264 | 0 | -0.13982668  | 0 | 0.062334841 | 0 | -0.000309211 |
| 0 | 0.04108138  | 0 | -0.032742298 | 0 | 0            | 0 | 0.089868851 | 0 | 0            |
| 0 | 0.060044595 | 0 | 0            | 0 | -0.096026699 | 0 | 0           | 0 | -0.055990806 |
| 0 | 0.063112201 | 0 | 0            | 0 | -0.090492667 | 0 | 0           | 0 | -0.059575032 |
| 0 | 0.063918211 | 0 | 0            | 0 | -0.088968368 | 0 | 0           | 0 | -0.059722351 |
| 0 | 0.063871682 | 0 | -0.000465651 | 0 | -0.088743686 | 0 | 0           | 0 | -0.059758016 |
| 0 | 0.04209623  | 0 | 0            | 0 | -0.12199617  | 0 | 0.045444866 | 0 | -0.038679619 |
| 0 | 0.085139764 | 0 | 0            | 0 | -0.039759568 | 0 | 0           | 0 | -0.080881776 |
| 0 | 0.021558616 | 0 | 0            | 0 | -0.12670891  | 0 | 0.056587597 | 0 | 0            |
| 0 | 0.066189526 | 0 | 0            | 0 | -0.089550488 | 0 | 0           | 0 | 0            |
| 0 | 0.067775601 | 0 | -0.00401938  | 0 | -0.083018768 | 0 | 0           | 0 | 0            |
| 0 | 0.066981443 | 0 | 0            | 0 | -0.088117109 | 0 | 0           | 0 | 0            |
| 0 | 0           | 0 | 0            | 0 | 0            | 0 | 0           | 0 | 1.0999542    |
| 0 | 0.018862637 | 0 | 0            | 0 | -0.13113832  | 0 | 0.052528781 | 0 | 0            |
| 0 | 0.019375815 | 0 | 0.001081342  | 0 | -0.13072563  | 0 | 0.053490393 | 0 | 0            |
| 0 | 0.097337786 | 0 | -0.017337968 | 0 | 0            | 0 | 0           | 0 | -0.096362282 |

|   |             |   |              |   |              |              |   |              |
|---|-------------|---|--------------|---|--------------|--------------|---|--------------|
| 0 | 0.10505833  | 0 | 0            | 0 | 0            | 0            | 0 | -0.1011903   |
| 0 | 0           | 0 | 0            | 0 | 0            | 0            | 0 | 1.093291     |
| 0 | 0.039425396 | 0 | -0.032646589 | 0 | 0            | 0.089745869  | 0 | 0            |
| 0 | 0.1052067   | 0 | 0            | 0 | 0            | 0            | 0 | -0.10629147  |
| 0 | 0.051137855 | 0 | 0            | 0 | 0            | 0.085181581  | 0 | 0            |
| 0 | 0.031694883 | 0 | 0            | 0 | -0.085704324 | 0            | 0 | 0            |
| 0 | 0           | 0 | -0.010347043 | 0 | -0.132396    | 0.055536887  | 0 | 0            |
| 0 | 0           | 0 | 0            | 0 | 0            | 0            | 0 | 1.1013456    |
| 0 | 0           | 0 | 0            | 0 | -0.13940497  | 0.057773405  | 0 | 0            |
| 0 | 0           | 0 | -0.004966419 | 0 | -0.13240206  | 0.060125238  | 0 | 0            |
| 0 | 0           | 0 | 0            | 0 | -0.13886698  | 0.058911621  | 0 | 0            |
| 0 | 0           | 0 | 0            | 0 | -0.13666923  | 0.060429509  | 0 | 0            |
| 0 | 0           | 0 | 0            | 0 | -0.13940108  | 0.057793265  | 0 | 0.000655004  |
| 0 | 0.052223458 | 0 | 0            | 0 | 0            | 0.086552677  | 0 | 0            |
| 0 | 0.024682259 | 0 | -0.011636173 | 0 | -0.099362701 | 0            | 0 | 0            |
| 0 | 0.051527263 | 0 | 0            | 0 | 0            | 0.086058886  | 0 | 0            |
| 0 | 0           | 0 | -0.003450227 | 0 | -0.13318037  | 0.06111356   | 0 | 0            |
| 0 | 0           | 0 | -0.00331867  | 0 | -0.13381924  | 0.060223296  | 0 | -4.79E-05    |
| 0 | 0           | 0 | 0            | 0 | -0.13617903  | 0.061249773  | 0 | 0.00116233   |
| 0 | 0           | 0 | -0.074104749 | 0 | 0            | 0            | 0 | 1.0984065    |
| 0 | 0           | 0 | -0.098126348 | 0 | 0            | 0            | 0 | 1.0873827    |
| 0 | 0.027222491 | 0 | 0            | 0 | -0.10499989  | 0            | 0 | 0            |
| 0 | 0.027365832 | 0 | 0            | 0 | -0.10491028  | 0            | 0 | 0            |
| 0 | 0           | 0 | 0            | 0 | 0            | 0            | 0 | 1.099896     |
| 0 | 0           | 0 | 0            | 0 | 0            | 0            | 0 | 1.0928384    |
| 0 | 0.056672176 | 0 | 0            | 0 | -0.092317849 | 0            | 0 | -0.052147307 |
| 0 | 0           | 0 | -0.0816017   | 0 | 0            | 0            | 0 | 1.0911953    |
| 0 | 0.058519401 | 0 | 0            | 0 | -0.08905947  | 0            | 0 | -0.054817271 |
| 0 | 0.059489029 | 0 | -0.002733182 | 0 | -0.084852917 | 0            | 0 | -0.055372934 |
| 0 | 0           | 0 | -0.07712826  | 0 | 0            | -0.007975534 | 0 | 1.0986119    |
| 0 | 0.03162712  | 0 | 0            | 0 | -0.083335116 | 0            | 0 | 0            |
| 0 | 0.033435517 | 0 | 0.004064495  | 0 | -0.086281278 | 0            | 0 | 0            |
| 0 | 0.032945562 | 0 | 0            | 0 | -0.082698967 | 0            | 0 | 0            |
| 0 | 0.030240518 | 0 | 0.004401479  | 0 | -0.097527244 | 0            | 0 | 0            |
| 0 | 0.031353802 | 0 | 0.004308083  | 0 | -0.095212795 | 0            | 0 | 0            |
| 0 | 0.029665175 | 0 | 0            | 0 | -0.093704079 | 0            | 0 | 0            |
| 0 | 0           | 0 | -0.036895813 | 0 | -0.072272204 | 0            | 0 | 0            |
| 0 | 0.049491862 | 0 | 0            | 0 | 0            | 0.085035484  | 0 | 0            |
| 0 | 0.031897928 | 0 | -0.058913742 | 0 | 0            | 0            | 0 | 0            |
| 0 | 0           | 0 | -0.028295998 | 0 | -0.097112778 | 0            | 0 | 0            |
| 0 | 0           | 0 | -0.073375201 | 0 | 0            | 0            | 0 | 1.0982026    |
| 0 | 0           | 0 | -0.095629135 | 0 | 0            | 0            | 0 | 1.088152     |
| 0 | 0           | 0 | -0.050820072 | 0 | 0            | 0.09361009   | 0 | 0            |
| 0 | 0           | 0 | -0.023137822 | 0 | -0.10170266  | 0            | 0 | 0            |
| 0 | 0           | 0 | -0.02604146  | 0 | -0.098353724 | 0            | 0 | -0.004397879 |
| 0 | 0           | 0 | -0.025015337 | 0 | -0.098704873 | 0            | 0 | 0            |
| 0 | 0.050280263 | 0 | 0            | 0 | 0            | 0.086137456  | 0 | 0            |

|   |             |   |              |   |              |              |   |              |
|---|-------------|---|--------------|---|--------------|--------------|---|--------------|
| 0 | 0           | 0 | -0.050003084 | 0 | 0            | 0.093328876  | 0 | -0.013899737 |
| 0 | 0           | 0 | 0            | 0 | -0.10561209  | 0            | 0 | 0            |
| 0 | 0           | 0 | -0.076333439 | 0 | 0            | -0.006976037 | 0 | 1.0980978    |
| 0 | 0           | 0 | 0            | 0 | -0.11698784  | 0            | 0 | 0            |
| 0 | 0.10494936  | 0 | 0            | 0 | 0            | 0            | 0 | 1.0099148    |
| 0 | 0           | 0 | -0.048127313 | 0 | 0            | 0.091045567  | 0 | 0            |
| 0 | 0           | 0 | 0            | 0 | -0.10566244  | 0            | 0 | 0            |
| 0 | 0           | 0 | 0            | 0 | -0.11599436  | 0            | 0 | 0            |
| 0 | 0           | 0 | 0            | 0 | -0.1163127   | 0            | 0 | -0.002339228 |
| 0 | 0.030991789 | 0 | 0            | 0 | -0.080350981 | 0            | 0 | 0            |
| 0 | 0           | 0 | -0.048555035 | 0 | 0            | 0.092489056  | 0 | 0            |
| 0 | 0           | 0 | 0            | 0 | -0.112773    | 0            | 0 | 0            |
| 0 | 0           | 0 | 0            | 0 | -0.10605631  | 0            | 0 | 0            |
| 0 | 0           | 0 | 0            | 0 | -0.10602982  | 0            | 0 | -9.66E-05    |
| 0 | 0           | 0 | 0            | 0 | -0.11274739  | 0            | 0 | 0.000280662  |
| 0 | 0.023415288 | 0 | -0.012622578 | 0 | -0.094765326 | 0            | 0 | 0            |
| 0 | 0           | 0 | -0.080766403 | 0 | 0            | 0            | 0 | 0            |
| 0 | 0.025919008 | 0 | 0            | 0 | -0.10143978  | 0            | 0 | 0            |
| 0 | 0           | 0 | -0.050143128 | 0 | 0            | 0.093454962  | 0 | 0            |
| 0 | 0           | 0 | -0.004543516 | 0 | -0.10086693  | 0            | 0 | 0            |
| 0 | 0           | 0 | 0            | 0 | -0.10467894  | 0            | 0 | 0            |
| 0 | 0           | 0 | 0            | 0 | -0.10250129  | 0            | 0 | 0            |
| 0 | 0.030501609 | 0 | 0            | 0 | -0.078667202 | 0            | 0 | 0            |
| 0 | 0.10202325  | 0 | 0            | 0 | 0            | -0.070636215 | 0 | 1.0761594    |
| 0 | 0           | 0 | 0            | 0 | -0.103682    | 0            | 0 | -0.004419808 |
| 0 | 0           | 0 | -0.002873841 | 0 | -0.10130943  | 0            | 0 | -0.004885998 |
| 0 | 0.032359576 | 0 | 0.001609516  | 0 | -0.07917105  | 0            | 0 | 0            |
| 0 | 0           | 0 | 0            | 0 | -0.10296786  | 0            | 0 | -0.004515035 |
| 0 | 0           | 0 | -0.002017538 | 0 | -0.10134104  | 0            | 0 | 0            |
| 0 | 0           | 0 | 0            | 0 | -0.10329368  | 0            | 0 | 0            |
| 0 | 0           | 0 | -0.001931885 | 0 | -0.10135012  | 0            | 0 | 0            |
| 0 | 0           | 0 | -0.049328939 | 0 | 0            | 0.093165149  | 0 | -0.013265448 |
| 0 | 0.028166581 | 0 | 0.001979034  | 0 | -0.093908544 | 0            | 0 | 0            |
| 0 | 0           | 0 | -0.038380105 | 0 | -0.065367881 | 0            | 0 | 0            |
| 0 | 0.030668402 | 0 | -0.057379178 | 0 | 0            | 0            | 0 | 0            |
| 0 | 0           | 0 | -0.07944495  | 0 | 0            | 0            | 0 | -0.01693727  |
| 0 | 0           | 0 | -0.04751176  | 0 | 0            | 0.090777933  | 0 | 0            |
| 0 | 0.10081393  | 0 | 0            | 0 | 0            | 0            | 0 | 1.0140568    |
| 0 | 0           | 0 | -0.004152794 | 0 | -0.099185203 | 0            | 0 | 0            |
| 0 | 0           | 0 | 0            | 0 | -0.10330358  | 0            | 0 | 0            |
| 0 | 0           | 0 | -0.005096239 | 0 | -0.090239098 | 0            | 0 | 0            |
| 0 | 0           | 0 | -0.002418643 | 0 | -0.10132682  | 0            | 0 | 0            |
| 0 | 0           | 0 | 0            | 0 | -0.10368149  | 0            | 0 | 0.000397188  |
| 0 | 0           | 0 | -0.002358828 | 0 | -0.10131342  | 0            | 0 | -5.71E-05    |
| 0 | 0           | 0 | -0.075822587 | 0 | 0            | 0            | 0 | 0            |
| 0 | 0           | 0 | -0.003369308 | 0 | -0.091645813 | 0            | 0 | -0.00063644  |
| 0 | 0           | 0 | -0.028472929 | 0 | -0.092666757 | 0            | 0 | 0            |

[illegible]

|   |             |   |              |   |             |   |              |   |              |
|---|-------------|---|--------------|---|-------------|---|--------------|---|--------------|
| 0 | 0           | 0 | 0            | 0 | 0           | 0 | 0.08613533   | 0 | -0.005478324 |
| 0 | 0.074489853 | 0 | -0.065084532 | 0 | 0           | 0 | -0.017797061 | 0 | -0.08089098  |
| 0 | 0           | 0 | 0            | 0 | 0           | 0 | 0.085279351  | 0 | -0.009285651 |
| 0 | 0           | 0 | -0.046556653 | 0 | 0           | 0 | 0            | 0 | 0            |
| 0 | 0.07639331  | 0 | -0.068238514 | 0 | 0           | 0 | 0            | 0 | 0            |
| 0 | 0.068438413 | 0 | -0.076274056 | 0 | 0           | 0 | 0            | 0 | -0.07724194  |
| 0 | 0           | 0 | -0.0456742   | 0 | 0           | 0 | 0            | 0 | -0.015796131 |
| 0 | 0.070978579 | 0 | -0.072028502 | 0 | 0           | 0 | 0            | 0 | -0.078870774 |
| 0 | 0.07267437  | 0 | -0.062094887 | 0 | 0           | 0 | 0            | 0 | -0.070949076 |
| 0 | 0           | 0 | -0.046500572 | 0 | 0           | 0 | 0            | 0 | 0            |
| 0 | 0           | 0 | -0.044110275 | 0 | 0           | 0 | 0            | 0 | 0            |
| 0 | 0           | 0 | -0.045621557 | 0 | 0           | 0 | 0            | 0 | -0.010025186 |
| 0 | 0           | 0 | -0.045884788 | 0 | 0           | 0 | 0            | 0 | 0            |
| 0 | 0           | 0 | -0.045001653 | 0 | 0           | 0 | 0            | 0 | -0.015478606 |
| 0 | 0.070014403 | 0 | -0.065000651 | 0 | 0           | 0 | -0.016060029 | 0 | -0.076133151 |
| 0 | 0.067246144 | 0 | -0.070575202 | 0 | 0           | 0 | 0            | 0 | -0.074583715 |
| 0 | 0.1153901   | 0 | 0            | 0 | 0           | 0 | 0            | 0 | 0            |
| 0 | 0.032007932 | 0 | -0.077451056 | 0 | 0           | 0 | 0            | 0 | 0            |
| 0 | 0.03629905  | 0 | -0.062425533 | 0 | 0           | 0 | 0            | 0 | 0            |
| 0 | 0.036116726 | 0 | -0.064555881 | 0 | 0           | 0 | 0.00484093   | 0 | 0            |
| 0 | 0.11397394  | 0 | 0            | 0 | 0           | 0 | -0.032813303 | 0 | 0            |
| 0 | 0.056748016 | 0 | 0            | 0 | 0           | 0 | 0.051351385  | 0 | 0.96349381   |
| 0 | 0.030311599 | 0 | -0.075920347 | 0 | 0           | 0 | 0            | 0 | 0            |
| 0 | 0           | 0 | 0            | 0 | 0           | 0 | 0            | 0 | 0            |
| 0 | 0           | 0 | -0.09778765  | 0 | 0           | 0 | 0            | 0 | 0            |
| 0 | 0.11082532  | 0 | 0            | 0 | 0           | 0 | 0            | 0 | 0            |
| 0 | 0.034034667 | 0 | -0.064555532 | 0 | 0           | 0 | 0.005082307  | 0 | 0            |
| 0 | 0           | 0 | 0            | 0 | 0           | 0 | 0            | 0 | -0.00825546  |
| 0 | 0           | 0 | -0.096284054 | 0 | 0           | 0 | 0            | 0 | -0.009538696 |
| 0 | 0           | 0 | -0.094529803 | 0 | 0           | 0 | 0            | 0 | 0            |
| 0 | 0           | 0 | 0            | 0 | 0           | 0 | 0            | 0 | 0            |
| 0 | 0           | 0 | -0.094662459 | 0 | 0           | 0 | 0.000326901  | 0 | 0            |
| 0 | 0.025433033 | 0 | -0.079059198 | 0 | 0           | 0 | -0.015885971 | 0 | 0            |
| 0 | 0           | 0 | 0            | 0 | 0           | 0 | 0            | 0 | 0            |
| 0 | 0.10738111  | 0 | 0            | 0 | 0           | 0 | 0            | 0 | -0.089879341 |
| 0 | 0.10965426  | 0 | 0            | 0 | 0           | 0 | -0.030730733 | 0 | 0            |
| 0 | 0.028374866 | 0 | -0.070461614 | 0 | 0           | 0 | -0.010758904 | 0 | 0            |
| 0 | 0           | 0 | 0            | 0 | 0           | 0 | 0            | 0 | 0            |
| 0 | 0.11326567  | 0 | 0            | 0 | 0           | 0 | -0.043891358 | 0 | 0            |
| 0 | 0           | 0 | 0            | 0 | 0           | 0 | 0            | 0 | -0.003123791 |
| 0 | 0.11338656  | 0 | 0            | 0 | 0           | 0 | 0            | 0 | 0            |
| 0 | 0.023784056 | 0 | -0.083413956 | 0 | 0           | 0 | 0            | 0 | 0            |
| 0 | 0.079838096 | 0 | 0            | 0 | 0.037138391 | 0 | 0            | 0 | 0.9924294    |
| 0 | 0           | 0 | 0            | 0 | 0           | 0 | 0            | 0 | -0.00831648  |
| 0 | 0           | 0 | -0.097357152 | 0 | 0           | 0 | -0.012126548 | 0 | 0            |
| 0 | 0           | 0 | 0            | 0 | 0           | 0 | 0            | 0 | 0            |
| 0 | 0           | 0 | -0.10006854  | 0 | 0           | 0 | 0            | 0 | 0            |





|   |             |   |              |   |              |   |              |   |              |
|---|-------------|---|--------------|---|--------------|---|--------------|---|--------------|
| 0 | 0           | 0 | 0            | 0 | -0.019396943 | 0 | 0            | 0 | 1.0733624    |
| 0 | 0.10226381  | 0 | 0            | 0 | 0            | 0 | -0.067800252 | 0 | -0.094197615 |
| 0 | 0           | 0 | -0.016610068 | 0 | -0.003439901 | 0 | 0            | 0 | 1.071185     |
| 0 | 0.058371838 | 0 | 0            | 0 | 0            | 0 | -0.014754976 | 0 | 0            |
| 0 | 0.059171298 | 0 | 0            | 0 | 0            | 0 | 0            | 0 | 0            |
| 0 | 0           | 0 | 0            | 0 | 0            | 0 | 0            | 0 | 1.144294     |
| 0 | 0.10415404  | 0 | 0            | 0 | 0            | 0 | 0            | 0 | -0.076502901 |
| 0 | 0.056434902 | 0 | 0            | 0 | 0            | 0 | -0.013930632 | 0 | 0            |
| 0 | 0.091709207 | 0 | 0            | 0 | 0.045436745  | 0 | 0.063209809  | 0 | 0            |
| 0 | 0.059045465 | 0 | 0            | 0 | 0            | 0 | -0.035092411 | 0 | 0            |
| 0 | 0.051773887 | 0 | 0            | 0 | 0            | 0 | -0.031418846 | 0 | 0            |
| 0 | 0.064154214 | 0 | 0            | 0 | 0            | 0 | 0.061097161  | 0 | 0            |
| 0 | 0.063917351 | 0 | 0            | 0 | 0            | 0 | 0.062665694  | 0 | 0            |
| 0 | 0.064669418 | 0 | 0.000485551  | 0 | 0            | 0 | 0.063315411  | 0 | 0            |
| 0 | 0.080277798 | 0 | 0            | 0 | 0.036843881  | 0 | 0.064121572  | 0 | -0.072583703 |
| 0 | 0.057779489 | 0 | 0            | 0 | 0            | 0 | 0.061985627  | 0 | -0.05469545  |
| 0 | 0.093196274 | 0 | 0            | 0 | 0            | 0 | 0            | 0 | 1.0355906    |
| 0 | 0.057468098 | 0 | 0            | 0 | 0            | 0 | 0.063257042  | 0 | -0.049620198 |
| 0 | 0.092846023 | 0 | 0            | 0 | 0.045870336  | 0 | 0            | 0 | 0            |
| 0 | 0.057203312 | 0 | -0.001436971 | 0 | 0            | 0 | 0.064059299  | 0 | -0.049371038 |
| 0 | 0.093768773 | 0 | -0.020476174 | 0 | 0.064972757  | 0 | 0            | 0 | 0            |
| 0 | 0.091736583 | 0 | 0            | 0 | 0.044213566  | 0 | 0            | 0 | 0            |
| 0 | 0.023448819 | 0 | -0.022659451 | 0 | 0            | 0 | 0.063516139  | 0 | 0            |
| 0 | 0.064793472 | 0 | 0            | 0 | 0            | 0 | 0            | 0 | 0            |
| 0 | 0.066442002 | 0 | 0.002139437  | 0 | 0            | 0 | 0            | 0 | 0            |
| 0 | 0.030649766 | 0 | 0            | 0 | 0            | 0 | 0.061593897  | 0 | 0            |
| 0 | 0.032068884 | 0 | 0            | 0 | 0.000552895  | 0 | 0.062536406  | 0 | 0            |
| 0 | 0.02758618  | 0 | -0.008972938 | 0 | 0            | 0 | 0.062779309  | 0 | 0            |
| 0 | 0           | 0 | -0.053470014 | 0 | 0.027472099  | 0 | 0.066046753  | 0 | 0            |
| 0 | 0.060497954 | 0 | -0.008237729 | 0 | 0            | 0 | 0            | 0 | 0            |
| 0 | 0.031102936 | 0 | -0.014091851 | 0 | 0.013269851  | 0 | 0.064255183  | 0 | 0            |
| 0 | 0.080798046 | 0 | 0            | 0 | 0.036769473  | 0 | 0            | 0 | -0.07766003  |
| 0 | 0           | 0 | -0.035345157 | 0 | 0            | 0 | 0.063513777  | 0 | 0            |
| 0 | 0.03099927  | 0 | 0            | 0 | 0.000391913  | 0 | 0.062183316  | 0 | 0            |
| 0 | 0           | 0 | -0.037463289 | 0 | 0            | 0 | 0.065616157  | 0 | 0            |
| 0 | 0.081579764 | 0 | -0.018588866 | 0 | 0.054067469  | 0 | 0            | 0 | -0.075698286 |
| 0 | 0           | 0 | -0.036538593 | 0 | 0            | 0 | 0.06537929   | 0 | -0.002462557 |
| 0 | 0.07947116  | 0 | 0            | 0 | 0.034969828  | 0 | 0            | 0 | -0.070251748 |
| 0 | 0.0580235   | 0 | 0            | 0 | 0            | 0 | 0            | 0 | -0.054391465 |
| 0 | 0.058628182 | 0 | 0.00016414   | 0 | 0            | 0 | 0            | 0 | -0.05500043  |
| 0 | 0.051832912 | 0 | -0.01141752  | 0 | 0            | 0 | 0            | 0 | -0.044502054 |
| 0 | 0           | 0 | -0.021288369 | 0 | 0            | 0 | 0.064317311  | 0 | 0            |
| 0 | 0           | 0 | -0.020630397 | 0 | 0            | 0 | 0.064347336  | 0 | -0.004935222 |
| 0 | 0           | 0 | -0.019512589 | 0 | -0.001440125 | 0 | 0.06420486   | 0 | 0            |
| 0 | 0           | 0 | 0            | 0 | -0.019716379 | 0 | 0.062181305  | 0 | 0            |
| 0 | 0           | 0 | -0.021720792 | 0 | 0.001225755  | 0 | 0.066774812  | 0 | 0            |
| 0 | 0           | 0 | 0            | 0 | 0            | 0 | -0.020377281 | 0 | 0.007877856  |

|   |              |   |              |   |              |   |              |   |              |
|---|--------------|---|--------------|---|--------------|---|--------------|---|--------------|
| 0 | 0            | 0 | 0            | 0 | 0            | 0 | -0.0205848   | 0 | 0            |
| 0 | 0            | 0 | 0            | 0 | -0.018469689 | 0 | 0.062854898  | 0 | 0            |
| 0 | 0.027621509  | 0 | -0.039775802 | 0 | 0.032087022  | 0 | 0            | 0 | 0            |
| 0 | 0            | 0 | -0.020038365 | 0 | -0.000870611 | 0 | 0.06638604   | 0 | 0.000472977  |
| 0 | 0            | 0 | 0            | 0 | 0            | 0 | -0.021290709 | 0 | 0            |
| 0 | 0            | 0 | 0            | 0 | 0            | 0 | 0.062509897  | 0 | 0            |
| 0 | 0            | 0 | 0            | 0 | -0.019051803 | 0 | 0.062860691  | 0 | -0.00072316  |
| 0 | 0            | 0 | 0            | 0 | -0.019954091 | 0 | 0.064025449  | 0 | 0.004206781  |
| 0 | 0            | 0 | 0            | 0 | -0.019409926 | 0 | 0.06433492   | 0 | 0            |
| 0 | 0            | 0 | 0            | 0 | 0            | 0 | 0.062536822  | 0 | -0.00187917  |
| 0 | 0.023176278  | 0 | -0.02141131  | 0 | 0            | 0 | 0            | 0 | 0            |
| 0 | 0            | 0 | 0            | 0 | 0            | 0 | 0            | 0 | 0.009902364  |
| 0 | 0            | 0 | 0            | 0 | 0            | 0 | 0            | 0 | 0            |
| 0 | 0            | 0 | 0            | 0 | 0            | 0 | -0.019307347 | 0 | 0.00783837   |
| 0 | 0            | 0 | 0            | 0 | 0            | 0 | -0.020209052 | 0 | 0            |
| 0 | 0            | 0 | 0            | 0 | -0.069101633 | 0 | -0.026668848 | 0 | 1.1008021    |
| 0 | 0            | 0 | 0            | 0 | 0            | 0 | -0.03110189  | 0 | 0            |
| 0 | 0            | 0 | 0            | 0 | 0            | 0 | -0.03107996  | 0 | 0.000999152  |
| 0 | 0.030998135  | 0 | 0            | 0 | -0.000860287 | 0 | 0            | 0 | 0            |
| 0 | 0            | 0 | -0.036091096 | 0 | 0            | 0 | 0            | 0 | 0            |
| 0 | 0            | 0 | -0.048562805 | 0 | 0.022359993  | 0 | 0            | 0 | 0            |
| 0 | 0.030261994  | 0 | -0.011138903 | 0 | 0.009356959  | 0 | 0            | 0 | 0            |
| 0 | 0            | 0 | 0            | 0 | -0.076233987 | 0 | 0            | 0 | 1.0816754    |
| 0 | 0            | 0 | 0            | 0 | -0.073738368 | 0 | -0.031737024 | 0 | 1.1101903    |
| 0 | 0            | 0 | -0.056111692 | 0 | 0.030050146  | 0 | 0            | 0 | 0            |
| 0 | 0            | 0 | -0.035178922 | 0 | 0            | 0 | 0            | 0 | -0.006342442 |
| 0 | 0            | 0 | -0.010152522 | 0 | -0.067943142 | 0 | -0.03833352  | 0 | 1.1083726    |
| 0 | 0            | 0 | -0.052895753 | 0 | 0.026590466  | 0 | 0            | 0 | -0.004797917 |
| 0 | 0            | 0 | 0.015547894  | 0 | -0.09061815  | 0 | 0            | 0 | 1.0785497    |
| 0 | 0.004603576  | 0 | 0            | 0 | -0.074842376 | 0 | -0.040347352 | 0 | 1.1077383    |
| 0 | 0.000767875  | 0 | 0            | 0 | -0.081207893 | 0 | 0            | 0 | 1.0739153    |
| 0 | 0            | 0 | 0            | 0 | 0            | 0 | -0.040899327 | 0 | 0.011117035  |
| 0 | 0            | 0 | 0            | 0 | 0            | 0 | -0.042182832 | 0 | 0            |
| 0 | 0            | 0 | -0.010022399 | 0 | -0.082076396 | 0 | 0            | 0 | 1.0818752    |
| 0 | -0.007478675 | 0 | 0            | 0 | -0.092493362 | 0 | 0            | 0 | 1.0907946    |
| 0 | 0            | 0 | -0.01932499  | 0 | -0.001353508 | 0 | 0            | 0 | 0            |
| 0 | 0            | 0 | 0            | 0 | -0.019796798 | 0 | 0            | 0 | 0            |
| 0 | 0            | 0 | 0            | 0 | -0.020415014 | 0 | 0            | 0 | -8.92E-05    |
| 0 | 0            | 0 | -0.017488651 | 0 | -0.003660732 | 0 | 0            | 0 | -0.003785439 |
| 0 | -0.018379057 | 0 | -0.010205432 | 0 | -0.098982739 | 0 | 0            | 0 | 1.088611     |
| 0 | 0            | 0 | -0.048777522 | 0 | 0            | 0 | -0.052282135 | 0 | 1.1268557    |
| 0 | 0.022855845  | 0 | -0.045594285 | 0 | 0            | 0 | -0.071191767 | 0 | 1.1127025    |
| 0 | 0.049414389  | 0 | 0            | 0 | 0            | 0 | -0.067508238 | 0 | 1.0963969    |
| 0 | 0            | 0 | -0.044418811 | 0 | 0            | 0 | -0.058097405 | 0 | 1.1255266    |
| 0 | 0.046756396  | 0 | 0            | 0 | 0            | 0 | -0.083959294 | 0 | 1.1274504    |
| 0 | 0            | 0 | 0            | 0 | 0            | 0 | -0.054878365 | 0 | 1.1455808    |
| 0 | 0            | 0 | -0.049959346 | 0 | 0            | 0 | 0            | 0 | 1.0864473    |

|   |              |   |              |   |              |   |              |              |
|---|--------------|---|--------------|---|--------------|---|--------------|--------------|
| 0 | 0.006326164  | 0 | -0.067516318 | 0 | 0            | 0 | 0            | 1.0790306    |
| 0 | 0.045961305  | 0 | 0            | 0 | 0            | 0 | 0            | 1.0564817    |
| 0 | 0.018847298  | 0 | -0.044257058 | 0 | 0            | 0 | 0            | 1.0531538    |
| 0 | 0.015167244  | 0 | 0            | 0 | -0.064670665 | 0 | -0.019247992 | 0            |
| 0 | 0.021410712  | 0 | 0            | 0 | -0.06321928  | 0 | -0.026044515 | 0            |
| 0 | 0.014706131  | 0 | 0.011780205  | 0 | -0.075013652 | 0 | -0.020545503 | 0            |
| 0 | 0            | 0 | 0            | 0 | -0.072258182 | 0 | -0.01451828  | 0.015428192  |
| 0 | 0.010942397  | 0 | 0            | 0 | -0.068568247 | 0 | -0.022196871 | 0.002392305  |
| 0 | 0            | 0 | 0.008517736  | 0 | -0.079891908 | 0 | -0.016394862 | 0.014001473  |
| 0 | 0.015692155  | 0 | 0.014138104  | 0 | -0.080811294 | 0 | 0            | 0            |
| 0 | 0            | 0 | 0.010405371  | 0 | -0.084283903 | 0 | 0            | 0.018233126  |
| 0 | 0.006576121  | 0 | 0            | 0 | -0.075004903 | 0 | 0            | 0.011250542  |
| 0 | 0            | 0 | 0            | 0 | -0.072389313 | 0 | -0.015409358 | 0            |
| 0 | 0.01538679   | 0 | 0            | 0 | -0.071980085 | 0 | 0            | 0            |
| 0 | 0            | 0 | 0.002727384  | 0 | -0.07441761  | 0 | -0.015762377 | 0            |
| 0 | 0            | 0 | 0.006208989  | 0 | -0.078096275 | 0 | -0.017151915 | 0            |
| 0 | 0.006597515  | 0 | 0.016931178  | 0 | -0.090246503 | 0 | 0            | 0.009826187  |
| 0 | 0.015700908  | 0 | 0.01810861   | 0 | -0.087831904 | 0 | 0            | 0            |
| 0 | 0            | 0 | 0.008842953  | 0 | -0.083734879 | 0 | 0            | 0            |
| 0 | 0            | 0 | -0.010345898 | 0 | -0.070070405 | 0 | -0.024066719 | 0.0154558    |
| 0 | 0.011015856  | 0 | -0.011297903 | 0 | -0.064582557 | 0 | -0.02911395  | 0            |
| 0 | 0.004793513  | 0 | 0            | 0 | -0.076925256 | 0 | -0.025845987 | 0.013179042  |
| 0 | 0.01437574   | 0 | 0            | 0 | -0.072968213 | 0 | -0.03074718  | 0            |
| 0 | 0            | 0 | -0.012103029 | 0 | -0.068850823 | 0 | -0.025244435 | 0            |
| 0 | 0.000960802  | 0 | -0.010228228 | 0 | -0.073242059 | 0 | -0.031953426 | 0.010474435  |
| 0 | 0.010613828  | 0 | -0.011773065 | 0 | -0.06780782  | 0 | -0.03670509  | 0            |
| 0 | -0.006852463 | 0 | -0.01034159  | 0 | -0.08455117  | 0 | 0            | 0.024771777  |
| 0 | 0.000441118  | 0 | -0.011879796 | 0 | -0.08242627  | 0 | 0            | 0            |
| 0 | 0.042127952  | 0 | -0.02818968  | 0 | 0            | 0 | -0.057921055 | 0            |
| 0 | 0.032857025  | 0 | -0.044036917 | 0 | 0            | 0 | -0.055275569 | 0            |
| 0 | 0.022948934  | 0 | -0.034731891 | 0 | 0            | 0 | -0.044058493 | 0            |
| 0 | 0.058312896  | 0 | 0            | 0 | 0            | 0 | -0.053118686 | 0            |
| 0 | 0.024839179  | 0 | -0.045288168 | 0 | 0            | 0 | -0.05228465  | -0.01171259  |
| 0 | 0.032887317  | 0 | -0.031461007 | 0 | 0            | 0 | -0.056478481 | -0.024379559 |
| 0 | 0            | 0 | -0.046529473 | 0 | 0            | 0 | -0.042255897 | 0.009228439  |
| 0 | 0.050967424  | 0 | 0            | 0 | 0            | 0 | -0.051386416 | -0.029664815 |
| 0 | 0            | 0 | -0.04761777  | 0 | 0            | 0 | -0.043134338 | 0            |
| 0 | 0.034271168  | 0 | -0.037067531 | 0 | 0            | 0 | 0            | 0            |
| 0 | 0.025730059  | 0 | -0.039785229 | 0 | 0            | 0 | 0            | -0.007074661 |
| 0 | 0.11186561   | 0 | 0            | 0 | 0            | 0 | 0.079344966  | 0.91107162   |
| 0 | 0.10691933   | 0 | 0            | 0 | 0            | 0 | 0.078779187  | 0.91641873   |
| 0 | 0.049057333  | 0 | 0            | 0 | -0.11765128  | 0 | 0.037588729  | 1.0201315    |
| 0 | 0.08722507   | 0 | 0            | 0 | -0.044032087 | 0 | 0            | 1.013598     |
| 0 | 0.10914787   | 0 | 0            | 0 | 0            | 0 | 0            | 0.98946967   |
| 0 | 0.10152785   | 0 | -0.017009123 | 0 | 0            | 0 | 0            | 0.99477396   |
| 0 | 0            | 0 | 0            | 0 | -0.10831612  | 0 | 0.081789028  | 1.0237883    |
| 0 | 0.10923481   | 0 | 0            | 0 | 0            | 0 | 0            | 0.9836356    |

|   |             |   |              |   |              |   |             |              |
|---|-------------|---|--------------|---|--------------|---|-------------|--------------|
| 0 | 0.10967655  | 0 | 0            | 0 | 0            | 0 | 0           | 0.99005826   |
| 0 | 0.059578252 | 0 | 0            | 0 | -0.095516793 | 0 | 0           | 1.044075     |
| 0 | 0.063474272 | 0 | 0            | 0 | -0.088396793 | 0 | 0           | 1.0404299    |
| 0 | 0.062924597 | 0 | 0            | 0 | -0.0894987   | 0 | 0           | 1.040243     |
| 0 | 0.063435281 | 0 | -0.000210654 | 0 | -0.088418226 | 0 | 0           | 1.0403026    |
| 0 | 0           | 0 | 0            | 0 | -0.13943792  | 0 | 0.050244046 | 1.0563647    |
| 0 | 0           | 0 | 0            | 0 | -0.13450303  | 0 | 0.055250501 | 1.052122     |
| 0 | 0.045037233 | 0 | 0            | 0 | -0.11471273  | 0 | 0.036664946 | 1.0251391    |
| 0 | 0           | 0 | 0            | 0 | -0.13425846  | 0 | 0.055277645 | 1.0523311    |
| 0 | 0           | 0 | -0.001095053 | 0 | -0.13361001  | 0 | 0.05469081  | 1.0521153    |
| 0 | 0.084074259 | 0 | 0            | 0 | -0.040326332 | 0 | 0           | 1.0164964    |
| 0 | 0.096581391 | 0 | -0.017304416 | 0 | 0            | 0 | 0           | 0.99947628   |
| 0 | 0           | 0 | 0            | 0 | -0.10299427  | 0 | 0.081273277 | 1.0242448    |
| 0 | 0.10429698  | 0 | 0            | 0 | 0            | 0 | 0           | 0.9941495    |
| 0 | 0.10446137  | 0 | 0            | 0 | 0            | 0 | 0           | 0.98763663   |
| 0 | 0.056200751 | 0 | 0            | 0 | -0.091773752 | 0 | 0           | 1.0475101    |
| 0 | 0.099269751 | 0 | 0            | 0 | -0.041173216 | 0 | 0.09327561  | 0            |
| 0 | 0.058316193 | 0 | 0            | 0 | -0.088049773 | 0 | 0           | 1.0445058    |
| 0 | 0.059044629 | 0 | -0.002499656 | 0 | -0.084477168 | 0 | 0           | 1.0442149    |
| 0 | 0.11061293  | 0 | -0.019862787 | 0 | 0            | 0 | 0.093247074 | 0            |
| 0 | 0.11952854  | 0 | 0            | 0 | 0            | 0 | 0.090318369 | 0            |
| 0 | 0           | 0 | 0            | 0 | -0.13417586  | 0 | 0.049206501 | 1.0575998    |
| 0 | 0           | 0 | -0.003304412 | 0 | -0.12765337  | 0 | 0.052575484 | 1.0538524    |
| 0 | 0           | 0 | 0            | 0 | -0.13044134  | 0 | 0.05285604  | 1.0544881    |
| 0 | 0           | 0 | -0.025596286 | 0 | -0.097959173 | 0 | 0           | 1.0964171    |
| 0 | 0.11960235  | 0 | 0            | 0 | 0            | 0 | 0.089574709 | 0            |
| 0 | 0.11999127  | 0 | 0            | 0 | 0            | 0 | 0.091125988 | 0            |
| 0 | 0           | 0 | 0            | 0 | -0.1153697   | 0 | 0           | 1.0985786    |
| 0 | 0           | 0 | 0            | 0 | -0.10584975  | 0 | 0           | 1.1013101    |
| 0 | 0           | 0 | 0            | 0 | -0.11207958  | 0 | 0           | 1.1021738    |
| 0 | 0.087892492 | 0 | 0            | 0 | -0.049306342 | 0 | 0.094221725 | -0.087088707 |
| 0 | 0           | 0 | 0            | 0 | -0.10263321  | 0 | 0           | 1.0961019    |
| 0 | 0           | 0 | -0.002621351 | 0 | -0.10049601  | 0 | 0           | 1.0954758    |
| 0 | 0           | 0 | 0            | 0 | -0.10286371  | 0 | 0           | 1.0960606    |
| 0 | 0           | 0 | -0.078881326 | 0 | 0            | 0 | 0           | 1.0800761    |
| 0 | 0           | 0 | 0            | 0 | -0.1035415   | 0 | 0           | 1.103092     |
| 0 | 0           | 0 | -0.002032167 | 0 | -0.10148037  | 0 | 0           | 1.1024746    |
| 0 | 0.095970575 | 0 | 0            | 0 | -0.037347043 | 0 | 0.092579553 | 0            |
| 0 | 0           | 0 | -0.003111065 | 0 | -0.091257164 | 0 | 0           | 1.1015685    |
| 0 | 0.1054353   | 0 | -0.020212211 | 0 | 0            | 0 | 0.092810624 | 0            |
| 0 | 0.10278654  | 0 | -0.021391419 | 0 | 0            | 0 | 0.09417888  | -0.10601161  |
| 0 | 0           | 0 | -0.025790419 | 0 | -0.093483077 | 0 | 0           | 1.0965573    |
| 0 | 0           | 0 | -0.049159292 | 0 | 0            | 0 | 0.080585905 | 1.012722     |
| 0 | 0.11448738  | 0 | 0            | 0 | 0            | 0 | 0.089838585 | 0            |
| 0 | 0.1124558   | 0 | 0            | 0 | 0            | 0 | 0.091158896 | -0.111921    |
| 0 | 0.11460554  | 0 | 0            | 0 | 0            | 0 | 0.088891274 | 0            |
| 0 | 0           | 0 | 0            | 0 | -0.1113591   | 0 | 0           | 1.0983995    |

|   |             |   |              |   |              |              |             |              |
|---|-------------|---|--------------|---|--------------|--------------|-------------|--------------|
| 0 | 0.11261057  | 0 | 0            | 0 | 0            | 0.09066989   | 0           | -0.11479068  |
| 0 | 0           | 0 | 0            | 0 | -0.10021326  | 0            | 0           | 1.1012413    |
| 0 | 0.11291665  | 0 | 0            | 0 | 0            | 0.091972593  | 0           | -0.11201715  |
| 0 | 0           | 0 | -0.004490964 | 0 | -0.096732697 | 0            | 0           | 1.0952546    |
| 0 | 0           | 0 | -0.076580669 | 0 | 0            | 0            | 0           | 1.0806632    |
| 0 | 0           | 0 | 0            | 0 | -0.097697666 | 0            | 0           | 1.0953515    |
| 0 | 0           | 0 | -0.048486098 | 0 | 0            | 0.080428298  | 0           | 1.013116     |
| 0 | 0           | 0 | -0.004249116 | 0 | -0.094138487 | 0            | 0           | 1.1018456    |
| 0 | 0.084563349 | 0 | 0            | 0 | -0.045602269 | 0            | 0.093508987 | -0.083321218 |
| 0 | 0.097665036 | 0 | -0.021751002 | 0 | 0            | 0.093694471  | 0           | -0.10054831  |
| 0 | 0.097766392 | 0 | -0.040768035 | 0 | 0            | 0            | 0           | 0            |
| 0 | 0.1074766   | 0 | 0            | 0 | 0            | 0.09062726   | 0           | -0.1064832   |
| 0 | 0.029725264 | 0 | 0            | 0 | -0.092365283 | 0            | 0.091620184 | 0            |
| 0 | 0.10767518  | 0 | 0            | 0 | 0            | 0.089939659  | 0           | -0.10985206  |
| 0 | 0.077090709 | 0 | -0.06139536  | 0 | 0            | 0            | 0           | 1.0302847    |
| 0 | 0           | 0 | -0.039330739 | 0 | -0.075600559 | 0            | 0.094239471 | 0            |
| 0 | 0.03080817  | 0 | 0            | 0 | -0.089745749 | 0            | 0.092642815 | 0            |
| 0 | 0.030993136 | 0 | 0.000853822  | 0 | -0.090346123 | 0            | 0.092450498 | 0            |
| 0 | 0.030833136 | 0 | 0            | 0 | -0.089616048 | 0            | 0.092453733 | 0            |
| 0 | 0.098406427 | 0 | 0            | 0 | -0.03817536  | 0            | 0           | 0            |
| 0 | 0.07585253  | 0 | -0.061022722 | 0 | 0            | -0.023126007 | 0           | 1.0409334    |
| 0 | 0.10048855  | 0 | 0            | 0 | -0.034093331 | 0            | 0           | 0            |
| 0 | 0.11724384  | 0 | 0            | 0 | 0            | 0            | 0           | 0            |
| 0 | 0.029691545 | 0 | -0.06424775  | 0 | 0            | 0.090900916  | 0           | 0            |
| 0 | 0.11020213  | 0 | -0.015733015 | 0 | 0            | 0            | 0           | 0            |
| 0 | 0.057625292 | 0 | 0            | 0 | -0.11853775  | 0            | 0.045717963 | 0            |
| 0 | 0.055670376 | 0 | 0            | 0 | -0.12134007  | 0            | 0.04307588  | 0            |
| 0 | 0.056385249 | 0 | 0            | 0 | -0.12035106  | 0            | 0.043095877 | 0            |
| 0 | 0.055770817 | 0 | -0.000878494 | 0 | -0.12059404  | 0            | 0.042549868 | 0            |
| 0 | 0.10090498  | 0 | -0.006000416 | 0 | -0.028660065 | 0            | 0           | 0            |
| 0 | 0.10082623  | 0 | 0            | 0 | -0.034529589 | 0            | 0           | 0            |
| 0 | 0           | 0 | 0            | 0 | -0.11107877  | 0            | 0.093776448 | 0            |
| 0 | 0.11779254  | 0 | 0            | 0 | 0            | 0            | 0           | 0            |
| 0 | 0           | 0 | 0            | 0 | -0.11126463  | 0            | 0.09237099  | 0            |
| 0 | 0           | 0 | 0            | 0 | -0.11162817  | 0            | 0.093459594 | 0            |
| 0 | 0           | 0 | 0            | 0 | -0.11139296  | 0            | 0.093484005 | -0.003064663 |
| 0 | 0           | 0 | 0            | 0 | 0            | 0.073518196  | 0           | 1.028836     |
| 0 | 0.11771756  | 0 | 0            | 0 | 0            | 0            | 0           | 0            |
| 0 | 0.11096133  | 0 | -0.015364454 | 0 | 0            | 0            | 0           | 0            |
| 0 | 0.067985387 | 0 | -0.075719496 | 0 | 0            | 0            | 0           | 1.0260123    |
| 0 | 0.088600966 | 0 | -0.043333649 | 0 | 0            | 0            | 0           | -0.093976615 |
| 0 | 0.072346427 | 0 | -0.061305855 | 0 | 0            | 0            | 0           | 1.0341803    |
| 0 | 0.02896904  | 0 | 0            | 0 | -0.086955148 | 0            | 0.091142453 | 0            |
| 0 | 0           | 0 | -0.085604672 | 0 | 0            | 0.094496056  | 0           | 0            |
| 0 | 0.07054395  | 0 | -0.071456361 | 0 | 0            | 0            | 0           | 1.0239968    |
| 0 | 0           | 0 | -0.045411132 | 0 | 0            | 0            | 0           | 1.0833961    |
| 0 | 0.093233381 | 0 | -0.039739612 | 0 | 0            | 0            | 0           | 0            |

|   |             |   |              |   |              |   |   |              |   |              |
|---|-------------|---|--------------|---|--------------|---|---|--------------|---|--------------|
| 0 | 0           | 0 | 0            | 0 | 0            | 0 | 0 | 0.072822105  | 0 | 1.0249376    |
| 0 | 0           | 0 | 0            | 0 | -0.10830901  | 0 | 0 | 0.093199365  | 0 | 0            |
| 0 | 0           | 0 | 0            | 0 | 0            | 0 | 0 | 0.074523594  | 0 | 1.0292409    |
| 0 | 0.048089997 | 0 | 0            | 0 | -0.12192839  | 0 | 0 | 0.049692996  | 0 | -0.042473284 |
| 0 | 0           | 0 | -0.045380986 | 0 | 0            | 0 | 0 | 0            | 0 | 1.0917403    |
| 0 | 0           | 0 | -0.084395023 | 0 | 0            | 0 | 0 | 0.094301941  | 0 | -0.020950738 |
| 0 | 0           | 0 | -0.007658301 | 0 | -0.10145074  | 0 | 0 | 0.095190134  | 0 | 0            |
| 0 | 0           | 0 | -0.040768188 | 0 | -0.068663428 | 0 | 0 | 0.093830412  | 0 | 0            |
| 0 | 0.045998884 | 0 | 0            | 0 | -0.1249235   | 0 | 0 | 0.046867455  | 0 | -0.043071504 |
| 0 | 0           | 0 | 0            | 0 | -0.10901694  | 0 | 0 | 0.09498033   | 0 | 0            |
| 0 | 0           | 0 | 0            | 0 | -0.10873963  | 0 | 0 | 0.09321347   | 0 | -0.005586814 |
| 0 | 0           | 0 | 0            | 0 | -0.10917948  | 0 | 0 | 0.09328663   | 0 | 0            |
| 0 | 0           | 0 | -0.004895823 | 0 | -0.10432847  | 0 | 0 | 0.093352313  | 0 | 0            |
| 0 | 0.046110931 | 0 | 0            | 0 | -0.12498712  | 0 | 0 | 0.04632248   | 0 | -0.043155699 |
| 0 | 0.046152277 | 0 | 0.000396865  | 0 | -0.12528699  | 0 | 0 | 0.046354061  | 0 | -0.043122027 |
| 0 | 0.07134946  | 0 | -0.060935809 | 0 | 0            | 0 | 0 | -0.021417497 | 0 | 1.0439444    |
| 0 | 0           | 0 | -0.005308395 | 0 | -0.104356    | 0 | 0 | 0.094777312  | 0 | 0            |
| 0 | 0           | 0 | -0.006002732 | 0 | -0.10337664  | 0 | 0 | 0.094839101  | 0 | -0.003796362 |
| 0 | 0.029620982 | 0 | 0            | 0 | -0.084835293 | 0 | 0 | 0.091714364  | 0 | 0            |
| 0 | 0           | 0 | 0            | 0 | -0.10934551  | 0 | 0 | 0.09467698   | 0 | -0.00264239  |
| 0 | 0.029843278 | 0 | -0.00171524  | 0 | -0.08311205  | 0 | 0 | 0.092090916  | 0 | 0            |
| 0 | 0.085838774 | 0 | 0            | 0 | -0.047143447 | 0 | 0 | 0            | 0 | -0.082492039 |
| 0 | 0           | 0 | 0            | 0 | 0            | 0 | 0 | 0.073398506  | 0 | 1.0289898    |
| 0 | 0.028398587 | 0 | -0.062747858 | 0 | 0            | 0 | 0 | 0.090683051  | 0 | 0            |
| 0 | 0           | 0 | -0.04474535  | 0 | 0            | 0 | 0 | 0            | 0 | 1.0831352    |
| 0 | 0           | 0 | -0.080859387 | 0 | 0            | 0 | 0 | 0.092862072  | 0 | 0            |
| 0 | 0           | 0 | -0.080612438 | 0 | 0            | 0 | 0 | 0.09243719   | 0 | 0            |
| 0 | 0           | 0 | 0            | 0 | 0            | 0 | 0 | 0.072581216  | 0 | 1.0247575    |
| 0 | 0.095478037 | 0 | 0            | 0 | -0.033859228 | 0 | 0 | 0            | 0 | 0            |
| 0 | 0.088115658 | 0 | 0            | 0 | -0.042951612 | 0 | 0 | 0            | 0 | -0.089057602 |
| 0 | 0.097393331 | 0 | 0            | 0 | -0.030308516 | 0 | 0 | 0            | 0 | 0            |
| 0 | 0.10522859  | 0 | -0.016041978 | 0 | 0            | 0 | 0 | 0            | 0 | 0            |
| 0 | 0.067443812 | 0 | -0.008586841 | 0 | -0.089144732 | 0 | 0 | 0            | 0 | 0            |
| 0 | 0.11237181  | 0 | 0            | 0 | 0            | 0 | 0 | 0            | 0 | 0            |
| 0 | 0.069605416 | 0 | 0            | 0 | -0.093164528 | 0 | 0 | 0            | 0 | 0            |
| 0 | 0.069449376 | 0 | 0            | 0 | -0.093567973 | 0 | 0 | 0            | 0 | 0            |
| 0 | 0.066790075 | 0 | -0.069995671 | 0 | 0            | 0 | 0 | 0            | 0 | 1.0281343    |
| 0 | 0.071614929 | 0 | 0            | 0 | -0.089482089 | 0 | 0 | 0            | 0 | 0            |
| 0 | 0.072235872 | 0 | -0.001797846 | 0 | -0.086732876 | 0 | 0 | 0            | 0 | 0            |
| 0 | 0.071564391 | 0 | -0.001674809 | 0 | -0.088146869 | 0 | 0 | 0            | 0 | 0            |
| 0 | 0.022586369 | 0 | 0            | 0 | -0.13294685  | 0 | 0 | 0.056740725  | 0 | 0            |
| 0 | 0.023138284 | 0 | 0            | 0 | -0.12993483  | 0 | 0 | 0.059260303  | 0 | 0            |
| 0 | 0.088376903 | 0 | -0.004145085 | 0 | -0.039359788 | 0 | 0 | 0            | 0 | -0.085310434 |
| 0 | 0           | 0 | -0.083269474 | 0 | 0            | 0 | 0 | 0.094187447  | 0 | 0            |
| 0 | 0.023727227 | 0 | 0.003688411  | 0 | -0.13300061  | 0 | 0 | 0.058802449  | 0 | 0            |
| 0 | 0.088306789 | 0 | 0            | 0 | -0.043426605 | 0 | 0 | 0            | 0 | -0.084456085 |
| 0 | 0           | 0 | 0            | 0 | -0.1053279   | 0 | 0 | 0.093282885  | 0 | 0            |

|   |             |   |              |   |              |   |             |   |              |
|---|-------------|---|--------------|---|--------------|---|-------------|---|--------------|
| 0 | 0           | 0 | 0            | 0 | -0.10550909  | 0 | 0.09168159  | 0 | 0            |
| 0 | 0.019772577 | 0 | 0            | 0 | -0.13600553  | 0 | 0.053886851 | 0 | 0            |
| 0 | 0.020936365 | 0 | 0.003557319  | 0 | -0.13643583  | 0 | 0.055682257 | 0 | 0            |
| 0 | 0           | 0 | 0            | 0 | -0.10566582  | 0 | 0.092985104 | 0 | -0.002492863 |
| 0 | 0.019889287 | 0 | 0.000246009  | 0 | -0.13622251  | 0 | 0.053368404 | 0 | 0            |
| 0 | 0.10952765  | 0 | 0            | 0 | 0            | 0 | 0           | 0 | -0.11060412  |
| 0 | 0.09788987  | 0 | -0.008281674 | 0 | -0.022596497 | 0 | 0           | 0 | 0            |
| 0 | 0.10169334  | 0 | -0.017328386 | 0 | 0            | 0 | 0           | 0 | -0.1061709   |
| 0 | 0.053242391 | 0 | 0            | 0 | -0.11599842  | 0 | 0.044244485 | 0 | 0            |
| 0 | 0.053041383 | 0 | 0            | 0 | -0.1161529   | 0 | 0.042842969 | 0 | 0            |
| 0 | 0.051610466 | 0 | -0.00340243  | 0 | -0.11542749  | 0 | 0.041591496 | 0 | 0            |
| 0 | 0.10997227  | 0 | 0            | 0 | 0            | 0 | 0           | 0 | -0.10653949  |
| 0 | 0           | 0 | -0.082066589 | 0 | 0            | 0 | 0.093979286 | 0 | -0.019893739 |
| 0 | 0.084118576 | 0 | -0.04234786  | 0 | 0            | 0 | 0           | 0 | -0.088847592 |
| 0 | 0.10231377  | 0 | -0.017006805 | 0 | 0            | 0 | 0           | 0 | -0.10166317  |
| 0 | 0           | 0 | 0            | 0 | -0.10298865  | 0 | 0.092513257 | 0 | 0            |
| 0 | 0.11000235  | 0 | 0            | 0 | 0            | 0 | 0           | 0 | -0.11108214  |
| 0 | 0           | 0 | -0.009962388 | 0 | -0.093944045 | 0 | 0.094850974 | 0 | 0            |
| 0 | 0           | 0 | -0.007146791 | 0 | -0.096902405 | 0 | 0.092794325 | 0 | 0            |
| 0 | 0           | 0 | 0            | 0 | -0.1034213   | 0 | 0.092525003 | 0 | -0.005504261 |
| 0 | 0           | 0 | -0.012321917 | 0 | -0.13635039  | 0 | 0.056066652 | 0 | 0            |
| 0 | 0           | 0 | -0.011145991 | 0 | -0.13609392  | 0 | 0.058574996 | 0 | 0            |
| 0 | 0           | 0 | -0.009743959 | 0 | -0.137962    | 0 | 0.057240138 | 0 | 0            |
| 0 | 0           | 0 | 0            | 0 | -0.14459159  | 0 | 0.059357063 | 0 | 0            |
| 0 | 0           | 0 | -0.008294968 | 0 | -0.095873632 | 0 | 0.094470175 | 0 | -0.003720688 |
| 0 | 0           | 0 | 0            | 0 | -0.14418804  | 0 | 0.059902258 | 0 | 0            |
| 0 | 0           | 0 | 0            | 0 | -0.14384396  | 0 | 0.060938759 | 0 | 0            |
| 0 | 0           | 0 | -0.010007366 | 0 | -0.13791154  | 0 | 0.056611296 | 0 | -0.001786947 |
| 0 | 0           | 0 | 0            | 0 | -0.14457655  | 0 | 0.059372559 | 0 | -1.73E-05    |
| 0 | 0           | 0 | 0            | 0 | -0.14384995  | 0 | 0.060585415 | 0 | 0.001369475  |
| 0 | 0           | 0 | -0.002975562 | 0 | -0.1381229   | 0 | 0.062772666 | 0 | 0            |
| 0 | 0           | 0 | -0.078371406 | 0 | 0            | 0 | 0.091973719 | 0 | 0            |
| 0 | 0           | 0 | 0            | 0 | -0.14050537  | 0 | 0.063290859 | 0 | 0            |
| 0 | 0           | 0 | -0.002731631 | 0 | -0.13810405  | 0 | 0.062768402 | 0 | 0            |
| 0 | 0           | 0 | -0.001435283 | 0 | -0.13876428  | 0 | 0.064029131 | 0 | 0            |
| 0 | 0           | 0 | 0            | 0 | -0.14000758  | 0 | 0.064103935 | 0 | 0.000628847  |
| 0 | 0           | 0 | -0.001333753 | 0 | -0.13953065  | 0 | 0.062868677 | 0 | -0.000375009 |
| 0 | 0           | 0 | -0.001117582 | 0 | -0.1390359   | 0 | 0.063642154 | 0 | 0.000507415  |
| 0 | 0.057718594 | 0 | -0.009307635 | 0 | -0.091486907 | 0 | 0           | 0 | -0.055484029 |
| 0 | 0.040997712 | 0 | -0.032867598 | 0 | 0            | 0 | 0.090000787 | 0 | 0            |
| 0 | 0.041519075 | 0 | -0.032652801 | 0 | 0            | 0 | 0.090186083 | 0 | 0            |
| 0 | 0.06006165  | 0 | 0            | 0 | -0.095863918 | 0 | 0           | 0 | -0.056013991 |
| 0 | 0.059959199 | 0 | 0            | 0 | -0.096172949 | 0 | 0           | 0 | -0.056004891 |
| 0 | 0.043738163 | 0 | 0            | 0 | -0.11942361  | 0 | 0.048242183 | 0 | -0.038060033 |
| 0 | 0.063088199 | 0 | 0            | 0 | -0.090395835 | 0 | 0           | 0 | -0.059600128 |
| 0 | 0.063093051 | 0 | -0.000441035 | 0 | -0.090114531 | 0 | 0           | 0 | -0.059637842 |
| 0 | 0.063892667 | 0 | -0.000561201 | 0 | -0.088488317 | 0 | 0           | 0 | -0.059802086 |

|   |             |   |              |   |              |   |              |   |              |
|---|-------------|---|--------------|---|--------------|---|--------------|---|--------------|
| 0 | 0.042785997 | 0 | 0            | 0 | -0.12084301  | 0 | 0.046062038  | 0 | -0.039352433 |
| 0 | 0.042023392 | 0 | -0.002087436 | 0 | -0.12019017  | 0 | 0.045412461  | 0 | -0.038998957 |
| 0 | 0.082892908 | 0 | 0            | 0 | -0.042946335 | 0 | 0            | 0 | -0.079082766 |
| 0 | 0.085011632 | 0 | 0            | 0 | -0.039271877 | 0 | 0            | 0 | -0.085966733 |
| 0 | 0           | 0 | -0.095489315 | 0 | 0            | 0 | 0            | 0 | 1.0976405    |
| 0 | 0           | 0 | 0            | 0 | 0            | 0 | 0            | 0 | 1.0927409    |
| 0 | 0.10669171  | 0 | 0            | 0 | 0            | 0 | 0            | 0 | 1.0214001    |
| 0 | 0.096795697 | 0 | -0.017644107 | 0 | 0            | 0 | 0            | 0 | -0.10133282  |
| 0 | 0.085349046 | 0 | -0.006401013 | 0 | -0.033425665 | 0 | 0            | 0 | -0.082304588 |
| 0 | 0.10473341  | 0 | 0            | 0 | 0            | 0 | 0            | 0 | -0.10579394  |
| 0 | 0.021146682 | 0 | 0            | 0 | -0.12848128  | 0 | 0.055319555  | 0 | 0            |
| 0 | 0.063755289 | 0 | -0.009813645 | 0 | -0.084748171 | 0 | 0            | 0 | 0            |
| 0 | 0.1050682   | 0 | 0            | 0 | 0            | 0 | -0.037926838 | 0 | 1.0418131    |
| 0 | 0.021680063 | 0 | 0.000985702  | 0 | -0.12753433  | 0 | 0.056568755  | 0 | 0            |
| 0 | 0.065683107 | 0 | 0            | 0 | -0.090420946 | 0 | 0            | 0 | 0            |
| 0 | 0.066822284 | 0 | -0.003993537 | 0 | -0.084693966 | 0 | 0            | 0 | 0            |
| 0 | 0           | 0 | 0            | 0 | 0            | 0 | 0            | 0 | 1.0999655    |
| 0 | 0.028053802 | 0 | -0.025499656 | 0 | -0.064707234 | 0 | 0            | 0 | 0            |
| 0 | 0.018623112 | 0 | -0.001229248 | 0 | -0.13041053  | 0 | 0.052327119  | 0 | 0            |
| 0 | 0           | 0 | 0            | 0 | 0            | 0 | 0            | 0 | 1.0933536    |
| 0 | 0.039538784 | 0 | -0.03262248  | 0 | 0            | 0 | 0.089827906  | 0 | 0            |
| 0 | 0.052035969 | 0 | 0            | 0 | 0            | 0 | 0.085891208  | 0 | 0            |
| 0 | 0.05113062  | 0 | 0            | 0 | 0            | 0 | 0.085203019  | 0 | 0            |
| 0 | 0           | 0 | -0.093819197 | 0 | 0            | 0 | -0.018331264 | 0 | 1.1040949    |
| 0 | 0.030699548 | 0 | 0            | 0 | -0.086180112 | 0 | 0            | 0 | 0            |
| 0 | 0.031685796 | 0 | 0            | 0 | -0.085721406 | 0 | 0            | 0 | 0            |
| 0 | 0           | 0 | -0.013037388 | 0 | -0.13057269  | 0 | 0.054924542  | 0 | 0            |
| 0 | 0           | 0 | 0            | 0 | 0            | 0 | 0            | 0 | 1.092243     |
| 0 | 0           | 0 | -0.011620925 | 0 | -0.13071811  | 0 | 0.056946257  | 0 | 0            |
| 0 | 0           | 0 | -0.010716731 | 0 | -0.13215004  | 0 | 0.055462824  | 0 | -0.001263181 |
| 0 | 0           | 0 | -0.098005661 | 0 | 0            | 0 | 0            | 0 | 1.0878414    |
| 0 | 0           | 0 | 0            | 0 | -0.1391235   | 0 | 0.058361956  | 0 | 0            |
| 0 | 0           | 0 | -0.09309885  | 0 | 0            | 0 | 0            | 0 | 1.0974766    |
| 0 | 0           | 0 | -0.07398641  | 0 | 0            | 0 | 0            | 0 | 1.0984985    |
| 0 | 0           | 0 | -0.004970697 | 0 | -0.13229463  | 0 | 0.060302388  | 0 | 0            |
| 0 | 0           | 0 | 0            | 0 | -0.13879343  | 0 | 0.059038991  | 0 | 0.001631882  |
| 0 | 0.024646448 | 0 | -0.011815311 | 0 | -0.099102665 | 0 | 0            | 0 | 0            |
| 0 | 0.052201564 | 0 | 0            | 0 | 0            | 0 | 0.086603437  | 0 | 0            |
| 0 | 0.025114182 | 0 | -0.012068828 | 0 | -0.09831159  | 0 | 0            | 0 | 0            |
| 0 | 0           | 0 | -0.003341864 | 0 | -0.13324034  | 0 | 0.061167468  | 0 | 0.000550302  |
| 0 | 0           | 0 | -0.074758407 | 0 | 0            | 0 | 0.001656114  | 0 | 1.0971208    |
| 0 | 0.027333578 | 0 | 0            | 0 | -0.10482594  | 0 | 0            | 0 | 0            |
| 0 | 0.10435306  | 0 | 0            | 0 | 0            | 0 | -0.046707021 | 0 | 1.0658501    |
| 0 | 0.054064324 | 0 | -0.010503099 | 0 | -0.087178764 | 0 | 0            | 0 | -0.051595967 |
| 0 | 0           | 0 | -0.043338454 | 0 | -0.065602377 | 0 | 0            | 0 | 0            |
| 0 | 0           | 0 | -0.077248473 | 0 | 0            | 0 | -0.006984761 | 0 | 1.0980856    |
| 0 | 0.056226175 | 0 | 0            | 0 | -0.093087529 | 0 | 0            | 0 | -0.052223869 |



|   |             |   |              |   |              |   |              |              |
|---|-------------|---|--------------|---|--------------|---|--------------|--------------|
| 0 | 0.1021768   | 0 | 0            | 0 | 0            | 0 | 0            | 1.0248453    |
| 0 | 0.058415514 | 0 | -0.002704472 | 0 | -0.086741256 | 0 | 0            | -0.055217524 |
| 0 | 0.032086209 | 0 | 0.00398969   | 0 | -0.086898268 | 0 | 0            | 0            |
| 0 | 0.031578278 | 0 | 0            | 0 | -0.083410472 | 0 | 0            | 0            |
| 0 | 0           | 0 | -0.035373869 | 0 | -0.073318889 | 0 | 0            | 0            |
| 0 | 0.10080365  | 0 | 0            | 0 | 0            | 0 | -0.035896094 | 1.0441885    |
| 0 | 0.033395408 | 0 | 0.004005984  | 0 | -0.08630223  | 0 | 0            | 0            |
| 0 | 0           | 0 | -0.091718007 | 0 | 0            | 0 | -0.016550474 | 1.1031693    |
| 0 | 0.030199341 | 0 | 0.004321429  | 0 | -0.097380559 | 0 | 0            | 0            |
| 0 | 0           | 0 | -0.040065211 | 0 | -0.068993471 | 0 | 0            | -0.008121504 |
| 0 | 0           | 0 | -0.036910383 | 0 | -0.07229794  | 0 | 0            | 0            |
| 0 | 0           | 0 | -0.050821276 | 0 | 0            | 0 | 0.091648108  | 0            |
| 0 | 0           | 0 | -0.026174496 | 0 | -0.1009725   | 0 | 0            | 0            |
| 0 | 0.050068995 | 0 | 0            | 0 | 0            | 0 | 0.085492715  | 0            |
| 0 | 0.031630444 | 0 | -0.058929944 | 0 | 0            | 0 | 0            | 0            |
| 0 | 0.031894109 | 0 | -0.058918651 | 0 | 0            | 0 | 0            | 0            |
| 0 | 0           | 0 | -0.028510002 | 0 | -0.096785121 | 0 | 0            | 0            |
| 0 | 0           | 0 | -0.07410895  | 0 | 0            | 0 | 0.001865799  | 1.096772     |
| 0 | 0           | 0 | -0.050974166 | 0 | 0            | 0 | 0.093817605  | 0            |
| 0 | 0           | 0 | -0.024358288 | 0 | -0.10141363  | 0 | 0            | -0.00572037  |
| 0 | 0.027098423 | 0 | -0.027314292 | 0 | -0.057960371 | 0 | 0            | 0            |
| 0 | 0           | 0 | -0.023289796 | 0 | -0.10145277  | 0 | 0            | 0            |
| 0 | 0           | 0 | -0.026244745 | 0 | -0.098031814 | 0 | 0            | -0.004442807 |
| 0 | 0           | 0 | -0.05001101  | 0 | 0            | 0 | 0.091683587  | -0.017771754 |
| 0 | 0           | 0 | 0            | 0 | -0.10490052  | 0 | 0            | 0            |
| 0 | 0.10468466  | 0 | 0            | 0 | 0            | 0 | 0            | 1.0105608    |
| 0 | 0           | 0 | -0.050155875 | 0 | 0            | 0 | 0.093534814  | -0.013927214 |
| 0 | 0           | 0 | 0            | 0 | -0.10537126  | 0 | 0            | -0.004361124 |
| 0 | 0           | 0 | 0            | 0 | -0.10565527  | 0 | 0            | 0            |
| 0 | 0           | 0 | 0            | 0 | -0.11685809  | 0 | 0            | 0            |
| 0 | 0           | 0 | -0.048278022 | 0 | 0            | 0 | 0.091238902  | 0            |
| 0 | 0.029638289 | 0 | 0            | 0 | -0.081065371 | 0 | 0            | 0            |
| 0 | 0           | 0 | 0            | 0 | -0.1056971   | 0 | 0            | 0            |
| 0 | 0           | 0 | 0            | 0 | -0.11618948  | 0 | 0            | -0.00239198  |
| 0 | 0           | 0 | 0            | 0 | -0.10606381  | 0 | 0            | -9.27E-05    |
| 0 | 0           | 0 | -0.080116592 | 0 | 0            | 0 | 0            | 0            |
| 0 | 0           | 0 | -0.050173102 | 0 | 0            | 0 | 0.091379686  | 0            |
| 0 | 0.099644755 | 0 | 0            | 0 | 0            | 0 | -0.046358153 | 1.0694598    |
| 0 | 0.023539299 | 0 | -0.012742898 | 0 | -0.094468366 | 0 | 0            | 0            |
| 0 | 0           | 0 | -0.080789721 | 0 | 0            | 0 | 0            | 0            |
| 0 | 0           | 0 | -0.044633103 | 0 | -0.058883197 | 0 | 0            | 0            |
| 0 | 0           | 0 | -0.004672643 | 0 | -0.1006223   | 0 | 0            | 0            |
| 0 | 0           | 0 | -0.00489374  | 0 | -0.097722288 | 0 | 0            | 0            |
| 0 | 0           | 0 | -0.049362481 | 0 | 0            | 0 | 0.091409306  | -0.017461009 |
| 0 | 0           | 0 | 0            | 0 | -0.10257945  | 0 | 0            | 0            |
| 0 | 0           | 0 | -0.078890791 | 0 | 0            | 0 | 0            | -0.021061958 |
| 0 | 0           | 0 | -0.036551822 | 0 | -0.06675241  | 0 | 0            | 0            |

|   |             |   |              |   |              |              |              |              |
|---|-------------|---|--------------|---|--------------|--------------|--------------|--------------|
| 0 | 0.10187571  | 0 | 0            | 0 | 0            | -0.070092843 | 0            | 1.0760575    |
| 0 | 0.030676702 | 0 | 0.001531627  | 0 | -0.08002208  | 0            | 0            | 0            |
| 0 | 0           | 0 | -0.002994873 | 0 | -0.10108046  | 0            | 0            | -0.004960842 |
| 0 | 0           | 0 | 0            | 0 | -0.10304481  | 0            | 0            | -0.004533328 |
| 0 | 0           | 0 | -0.003018882 | 0 | -0.10002232  | 0            | 0            | -0.005119221 |
| 0 | 0           | 0 | -0.002017236 | 0 | -0.10134632  | 0            | 0            | 0            |
| 0 | 0           | 0 | -0.041357109 | 0 | -0.062285495 | 0            | 0            | -0.007848392 |
| 0 | 0.030077247 | 0 | -0.057427628 | 0 | 0            | 0            | 0            | 0            |
| 0 | 0           | 0 | -0.079467468 | 0 | 0            | 0            | 0            | -0.016939138 |
| 0 | 0           | 0 | -0.004232868 | 0 | -0.099179114 | 0            | 0            | 0            |
| 0 | 0           | 0 | -0.002434012 | 0 | -0.1013099   | 0            | 0            | -6.53E-05    |
| 0 | 0           | 0 | -0.02612687  | 0 | -0.096958323 | 0            | 0            | 0            |
| 0 | 0           | 0 | -0.07584605  | 0 | 0            | 0            | 0            | 0            |
| 0 | 0           | 0 | -0.024301554 | 0 | -0.097424635 | 0            | 0            | -0.005333496 |
| 0 | 0           | 0 | 0            | 0 | -0.099315278 | 0            | 0            | 0            |
| 0 | 0           | 0 | -0.077807473 | 0 | 0            | 0            | 0            | 0            |
| 0 | 0           | 0 | 0            | 0 | -0.099790715 | 0            | 0            | -0.004283727 |
| 0 | 0           | 0 | -0.07659031  | 0 | 0            | 0            | 0            | -0.020433244 |
| 0 | 0           | 0 | -0.007113529 | 0 | -0.090468559 | 0            | 0            | 0            |
| 0 | 0.085312627 | 0 | -0.061986284 | 0 | 0            | 0            | 0            | 0            |
| 0 | 0.086679289 | 0 | -0.059522173 | 0 | 0            | 0            | -0.00593449  | 0            |
| 0 | 0.083673484 | 0 | -0.065517101 | 0 | 0            | 0            | 0            | 0            |
| 0 | 0           | 0 | -0.005241175 | 0 | -0.092749022 | 0            | 0            | -0.005481778 |
| 0 | 0.10350283  | 0 | 0            | 0 | 0            | 0            | 0            | 1.0422641    |
| 0 | 0.042223428 | 0 | -0.028363556 | 0 | 0            | 0            | 0            | 0            |
| 0 | 0.083002651 | 0 | -0.063907179 | 0 | 0            | 0            | -0.018537892 | 0            |
| 0 | 0.051390488 | 0 | 0            | 0 | 0            | 0            | 0            | 0            |
| 0 | 0.083099525 | 0 | -0.064076068 | 0 | 0            | 0            | -0.019538317 | 0            |
| 0 | 0           | 0 | 0            | 0 | 0            | 0            | 0.084809932  | 0            |
| 0 | 0           | 0 | 0            | 0 | 0            | 0            | 0.086611202  | 0            |
| 0 | 0           | 0 | 0            | 0 | 0            | 0            | 0.084839766  | -0.009428565 |
| 0 | 0.079935727 | 0 | -0.069726513 | 0 | 0            | 0            | 0            | 0            |
| 0 | 0           | 0 | 0            | 0 | 0            | 0            | 0.084693459  | 0            |
| 0 | 0           | 0 | 0            | 0 | 0            | 0            | 0.086333655  | -0.006006015 |
| 0 | 0.077232406 | 0 | -0.06211253  | 0 | 0            | 0            | 0            | -0.075389678 |
| 0 | 0.074515583 | 0 | -0.067680776 | 0 | 0            | 0            | 0            | -0.07308748  |
| 0 | 0           | 0 | 0            | 0 | 0            | 0            | 0.085601124  | 0            |
| 0 | 0.081749333 | 0 | -0.059722112 | 0 | 0            | 0            | -0.005275926 | 0            |
| 0 | 0.078122581 | 0 | -0.060614109 | 0 | 0            | 0            | -0.003673423 | -0.076228243 |
| 0 | 0.079435887 | 0 | -0.064306725 | 0 | 0            | 0            | 0            | 0            |
| 0 | 0           | 0 | 0            | 0 | 0            | 0            | 0.085630217  | -0.009509725 |
| 0 | 0           | 0 | 0            | 0 | 0            | 0            | 0.084575739  | 0            |
| 0 | 0           | 0 | 0            | 0 | 0            | 0            | 0.084601171  | -0.009217123 |
| 0 | 0.078974384 | 0 | -0.063161802 | 0 | 0            | 0            | -0.017417504 | 0            |
| 0 | 0.074217041 | 0 | -0.065241632 | 0 | 0            | 0            | -0.016914928 | -0.080692248 |
| 0 | 0.073617152 | 0 | -0.066697968 | 0 | 0            | 0            | -0.018505176 | -0.080344094 |
| 0 | 0           | 0 | -0.046653643 | 0 | 0            | 0            | 0            | 0            |

|   |             |   |              |             |   |              |   |              |
|---|-------------|---|--------------|-------------|---|--------------|---|--------------|
| 0 | 0.070729298 | 0 | -0.072018571 | 0           | 0 | 0            | 0 | -0.078666621 |
| 0 | 0           | 0 | -0.045767168 | 0           | 0 | 0            | 0 | -0.015834115 |
| 0 | 0.070336205 | 0 | -0.066504394 | 0           | 0 | 0            | 0 | -0.069090538 |
| 0 | 0.073281885 | 0 | -0.060806257 | 0           | 0 | -0.003024901 | 0 | -0.071654595 |
| 0 | 0.069566504 | 0 | -0.0658173   | 0           | 0 | -0.016419436 | 0 | -0.0758502   |
| 0 | 0.11518929  | 0 | 0            | 0           | 0 | -0.020321517 | 0 | 0            |
| 0 | 0.11520666  | 0 | 0            | 0           | 0 | 0            | 0 | 0            |
| 0 | 0.031788122 | 0 | -0.077518563 | 0           | 0 | 0            | 0 | 0            |
| 0 | 0.032008462 | 0 | -0.077439133 | 0           | 0 | -5.74E-05    | 0 | 0            |
| 0 | 0.079364994 | 0 | 0            | 0.037363641 | 0 | 0.051498582  | 0 | 0.94187915   |
| 0 | 0.035893218 | 0 | -0.064746513 | 0           | 0 | 0.005459687  | 0 | 0            |
| 0 | 0.11381442  | 0 | 0            | 0           | 0 | -0.032190517 | 0 | 0            |
| 0 | 0.056554372 | 0 | 0            | 0           | 0 | 0.049412548  | 0 | 0.95821235   |
| 0 | 0.056240178 | 0 | 0            | 0           | 0 | 0.050648888  | 0 | 0.96377036   |
| 0 | 0.11063157  | 0 | 0            | 0           | 0 | -0.019236412 | 0 | 0            |
| 0 | 0.056340213 | 0 | -0.0007589   | 0           | 0 | 0.051405887  | 0 | 0.96366604   |
| 0 | 0.030304003 | 0 | -0.076068309 | 0           | 0 | 0.000692073  | 0 | 0            |
| 0 | 0           | 0 | -0.097760487 | 0           | 0 | 0            | 0 | 0            |
| 0 | 0           | 0 | 0            | 0           | 0 | 0            | 0 | 0            |
| 0 | 0           | 0 | -0.097588989 | 0           | 0 | -0.001019783 | 0 | 0            |
| 0 | 0.10708726  | 0 | 0            | 0           | 0 | -0.018980078 | 0 | -0.091687398 |
| 0 | 0           | 0 | -0.096258525 | 0           | 0 | 0            | 0 | -0.00973896  |
| 0 | 0           | 0 | 0            | 0           | 0 | 0            | 0 | -0.008258094 |
| 0 | 0.079714993 | 0 | 0            | 0.037366039 | 0 | 0            | 0 | 0.98367646   |
| 0 | 0           | 0 | -0.096221393 | 0           | 0 | -0.000322011 | 0 | -0.009561492 |
| 0 | 0           | 0 | -0.094747723 | 0           | 0 | 0.00105089   | 0 | 0            |
| 0 | 0.025227835 | 0 | -0.079288351 | 0           | 0 | -0.014930332 | 0 | 0            |
| 0 | 0           | 0 | 0            | 0           | 0 | -0.027097183 | 0 | 1.1466996    |
| 0 | 0.080483615 | 0 | -0.018467298 | 0.054563218 | 0 | 0            | 0 | 0.987869     |
| 0 | 0.1071956   | 0 | 0            | 0           | 0 | 0            | 0 | -0.089860982 |
| 0 | 0.078421967 | 0 | 0            | 0.035625333 | 0 | 0            | 0 | 0.99290352   |
| 0 | 0.11315033  | 0 | 0            | 0           | 0 | -0.043606758 | 0 | 0            |
| 0 | 0           | 0 | -0.097493553 | 0           | 0 | -0.011098927 | 0 | 0            |
| 0 | 0.056590734 | 0 | 0            | 0           | 0 | 0            | 0 | 1.0052656    |
| 0 | 0           | 0 | 0            | 0           | 0 | -0.026029547 | 0 | 1.1452449    |
| 0 | 0           | 0 | 0            | 0           | 0 | -0.036840858 | 0 | 1.1470374    |
| 0 | 0           | 0 | -0.079405401 | 0           | 0 | 0.008229805  | 0 | 0            |
| 0 | 0           | 0 | -0.095374521 | 0           | 0 | -0.000136338 | 0 | 0            |
| 0 | 0.057354375 | 0 | 0.000481234  | 0           | 0 | 0            | 0 | 1.0051007    |
| 0 | 0           | 0 | -0.096119951 | 0           | 0 | -0.011270559 | 0 | -0.016634827 |
| 0 | 0.10561679  | 0 | 0            | 0           | 0 | -0.031595048 | 0 | -0.098180547 |
| 0 | 0           | 0 | 0            | 0           | 0 | 0            | 0 | 1.1278555    |
| 0 | 0.050794661 | 0 | -0.01069025  | 0           | 0 | 0            | 0 | 1.0162746    |
| 0 | 0           | 0 | -0.078280841 | 0           | 0 | 0.008790743  | 0 | -0.008370151 |
| 0 | 0           | 0 | -0.094013525 | 0           | 0 | 0.000546415  | 0 | -0.009191096 |
| 0 | 0.1026174   | 0 | 0            | 0           | 0 | -0.017928314 | 0 | -0.087500646 |
| 0 | 0           | 0 | -0.035211719 | 0           | 0 | 0.052699947  | 0 | 1.0111562    |

|   |             |   |              |   |              |   |              |   |              |
|---|-------------|---|--------------|---|--------------|---|--------------|---|--------------|
| 0 | 0           | 0 | 0            | 0 | 0            | 0 | -0.045396648 | 0 | 1.1680346    |
| 0 | 0.10483917  | 0 | 0            | 0 | 0            | 0 | -0.041958153 | 0 | -0.085969611 |
| 0 | 0           | 0 | -0.019658256 | 0 | 0            | 0 | 0.051639303  | 0 | 1.0115438    |
| 0 | 0           | 0 | -0.019310825 | 0 | -0.000379157 | 0 | 0.053663188  | 0 | 1.0174181    |
| 0 | 0           | 0 | 0            | 0 | -0.017893107 | 0 | 0.050200924  | 0 | 1.0173469    |
| 0 | 0           | 0 | 0            | 0 | -0.018788232 | 0 | 0.051338749  | 0 | 1.0225893    |
| 0 | 0           | 0 | 0            | 0 | 0            | 0 | 0.049831308  | 0 | 1.0185706    |
| 0 | 0           | 0 | -0.033990867 | 0 | 0            | 0 | 0            | 0 | 1.0556504    |
| 0 | 0           | 0 | -0.052143637 | 0 | 0.027310164  | 0 | 0            | 0 | 1.0600783    |
| 0 | 0           | 0 | 0            | 0 | -0.019041188 | 0 | 0            | 0 | 1.0650103    |
| 0 | 0           | 0 | -0.017353605 | 0 | -0.002426069 | 0 | 0            | 0 | 1.0617904    |
| 0 | 0.058253091 | 0 | 0            | 0 | 0            | 0 | -0.014319743 | 0 | 0            |
| 0 | 0.092414045 | 0 | -0.023584248 | 0 | 0.067630025  | 0 | 0.064896177  | 0 | 0            |
| 0 | 0.091536966 | 0 | 0            | 0 | 0.045592205  | 0 | 0.060928797  | 0 | 0            |
| 0 | 0.090519988 | 0 | 0            | 0 | 0.044151623  | 0 | 0.062639046  | 0 | 0            |
| 0 | 0.063710659 | 0 | 0            | 0 | 0            | 0 | 0.060575125  | 0 | 0            |
| 0 | 0.064255251 | 0 | 0.00018857   | 0 | 0            | 0 | 0.061083547  | 0 | 0            |
| 0 | 0.058305164 | 0 | -0.010039521 | 0 | 0            | 0 | 0.063089333  | 0 | 0            |
| 0 | 0.090079582 | 0 | -0.052937114 | 0 | 0.090481794  | 0 | 0            | 0 | 0            |
| 0 | 0.081019972 | 0 | -0.021863653 | 0 | 0.057478204  | 0 | 0.065747496  | 0 | -0.077594966 |
| 0 | 0.080194184 | 0 | 0            | 0 | 0.037032024  | 0 | 0.06212806   | 0 | -0.077573517 |
| 0 | 0.0790157   | 0 | 0            | 0 | 0.035485801  | 0 | 0.063508809  | 0 | -0.071523569 |
| 0 | 0.093513892 | 0 | -0.021295184 | 0 | 0.065924445  | 0 | 0            | 0 | 0            |
| 0 | 0.057322796 | 0 | 0            | 0 | 0            | 0 | 0.061445787  | 0 | -0.054201595 |
| 0 | 0.050146388 | 0 | -0.013047703 | 0 | 0            | 0 | 0.063747332  | 0 | -0.044863195 |
| 0 | 0.05686229  | 0 | -0.001705836 | 0 | 0            | 0 | 0.062101618  | 0 | -0.054103672 |
| 0 | 0.091641946 | 0 | 0            | 0 | 0.044564612  | 0 | 0            | 0 | 0            |
| 0 | 0.025873925 | 0 | -0.042853777 | 0 | 0.034417434  | 0 | 0.064259961  | 0 | 0            |
| 0 | 0.078041737 | 0 | -0.050436205 | 0 | 0.079152067  | 0 | 0            | 0 | -0.079112872 |
| 0 | 0.021980496 | 0 | -0.022948527 | 0 | 0            | 0 | 0.062500673  | 0 | 0            |
| 0 | 0.060515405 | 0 | -0.007667698 | 0 | 0            | 0 | 0            | 0 | 0            |
| 0 | 0.081469893 | 0 | -0.019359802 | 0 | 0.055043188  | 0 | 0            | 0 | -0.082242172 |
| 0 | 0           | 0 | -0.05938413  | 0 | 0.033824036  | 0 | 0.066784894  | 0 | 0            |
| 0 | 0           | 0 | -0.051606311 | 0 | 0.025770304  | 0 | 0.064412121  | 0 | 0            |
| 0 | 0           | 0 | -0.036985613 | 0 | 0            | 0 | 0.063553407  | 0 | 0            |
| 0 | 0.030507896 | 0 | 0            | 0 | -0.00047195  | 0 | 0.061592837  | 0 | 0            |
| 0 | 0.079500335 | 0 | 0            | 0 | 0.03536774   | 0 | 0            | 0 | -0.076312029 |
| 0 | 0.029368672 | 0 | -0.014086    | 0 | 0.01211848   | 0 | 0.063202198  | 0 | 0            |
| 0 | 0           | 0 | -0.056357562 | 0 | 0.030563387  | 0 | 0.066496832  | 0 | -0.007288947 |
| 0 | 0           | 0 | -0.036131103 | 0 | 0            | 0 | 0.063622392  | 0 | -0.006938436 |
| 0 | 0.051926452 | 0 | -0.01088     | 0 | 0            | 0 | 0            | 0 | -0.050346698 |
| 0 | 0           | 0 | -0.022302064 | 0 | 0.002055269  | 0 | 0.064405148  | 0 | 0            |
| 0 | 0           | 0 | -0.020574368 | 0 | -0.000118906 | 0 | 0.06434243   | 0 | -0.004919913 |
| 0 | 0           | 0 | 0            | 0 | -0.019088869 | 0 | 0.062188178  | 0 | 0            |
| 0 | 0           | 0 | 0            | 0 | -0.019669858 | 0 | 0.062188758  | 0 | -0.000589742 |
| 0 | 0.025642555 | 0 | -0.039023727 | 0 | 0.030140095  | 0 | 0            | 0 | 0            |
| 0 | 0           | 0 | 0            | 0 | 0            | 0 | -0.019782405 | 0 | 0.007766047  |

|   |             |   |              |   |              |             |              |   |              |
|---|-------------|---|--------------|---|--------------|-------------|--------------|---|--------------|
| 0 | 0           | 0 | 0            | 0 | 0            | -0.02068054 | 0            | 0 |              |
| 0 | 0.013566408 | 0 | 0            | 0 | -0.062488605 | 0           | -0.031247417 | 0 | 1.0914735    |
| 0 | 0           | 0 | 0            | 0 | -0.067696333 | 0           | -0.023193514 | 0 | 1.1014267    |
| 0 | 0           | 0 | -0.055415649 | 0 | 0.029836943  | 0           | 0            | 0 | 0            |
| 0 | 0           | 0 | 0.006164063  | 0 | -0.073449122 | 0           | -0.025120663 | 0 | 1.1008163    |
| 0 | 0           | 0 | -0.052299236 | 0 | 0.026421784  | 0           | 0            | 0 | -0.010462941 |
| 0 | 0           | 0 | -0.01023747  | 0 | -0.064864521 | 0           | -0.031795487 | 0 | 1.1080578    |
| 0 | 0           | 0 | 0.010982517  | 0 | -0.083304388 | 0           | 0            | 0 | 1.083597     |
| 0 | 0.007835032 | 0 | 0            | 0 | -0.070272817 | 0           | -0.034759787 | 0 | 1.1055109    |
| 0 | 0.005785458 | 0 | 0            | 0 | -0.073964669 | 0           | 0            | 0 | 1.0762592    |
| 0 | 0.004352262 | 0 | -0.010057074 | 0 | -0.066239761 | 0           | -0.040311456 | 0 | 1.1058234    |
| 0 | 0.005697213 | 0 | 0.017512565  | 0 | -0.089889705 | 0           | 0            | 0 | 1.0732448    |
| 0 | -0.00771534 | 0 | -0.010205904 | 0 | -0.083735192 | 0           | 0            | 0 | 1.0888671    |
| 0 | 0.025977846 | 0 | -0.04168788  | 0 | 0            | 0           | -0.058821521 | 0 | 1.1083663    |
| 0 | 0.033297009 | 0 | -0.029113454 | 0 | 0            | 0           | -0.062577592 | 0 | 1.0990918    |
| 0 | 0.05001378  | 0 | 0            | 0 | 0            | 0           | -0.058108629 | 0 | 1.095122     |
| 0 | 0           | 0 | -0.044389006 | 0 | 0            | 0           | -0.049253995 | 0 | 1.1249065    |
| 0 | 0.024865419 | 0 | -0.038870659 | 0 | 0            | 0           | 0            | 0 | 1.0643031    |
| 0 | 0.023195295 | 0 | 0            | 0 | -0.060663692 | 0           | -0.022476524 | 0 | 0            |
| 0 | 0.016922456 | 0 | 0.009939478  | 0 | -0.070953431 | 0           | -0.017669758 | 0 | 0            |
| 0 | 0.023876144 | 0 | 0.011964353  | 0 | -0.070449452 | 0           | -0.023882788 | 0 | 0            |
| 0 | 0.012879207 | 0 | 0            | 0 | -0.065796826 | 0           | -0.018358415 | 0 | 0.003865157  |
| 0 | 0.013379768 | 0 | 0.011748891  | 0 | -0.075660449 | 0           | -0.020079218 | 0 | 0.002187002  |
| 0 | 0           | 0 | 0.006513625  | 0 | -0.076953482 | 0           | -0.013151059 | 0 | 0.016374962  |
| 0 | 0.009859146 | 0 | 0.013367858  | 0 | -0.082323536 | 0           | 0            | 0 | 0.010054894  |
| 0 | 0.018957715 | 0 | 0.01457167   | 0 | -0.079959234 | 0           | 0            | 0 | 0            |
| 0 | 0           | 0 | 0.004551683  | 0 | -0.075673029 | 0           | -0.014448757 | 0 | 0            |
| 0 | 0.004540048 | 0 | -0.010250433 | 0 | -0.068152612 | 0           | -0.025807817 | 0 | 0.011478137  |
| 0 | 0.01407206  | 0 | -0.011788336 | 0 | -0.062874116 | 0           | -0.030710947 | 0 | 0            |
| 0 | 0.042952715 | 0 | -0.027766505 | 0 | 0            | 0           | -0.048600252 | 0 | 0            |
| 0 | 0.033789341 | 0 | -0.030997894 | 0 | 0            | 0           | -0.046399309 | 0 | -0.018939083 |
| 0 | 0.086985835 | 0 | 0            | 0 | -0.049033684 | 0           | 0.081586014  | 0 | 0.93489111   |
| 0 | 0.1020427   | 0 | -0.020760819 | 0 | 0            | 0           | 0.081509656  | 0 | 0.9144886    |
| 0 | 0.11141094  | 0 | 0            | 0 | 0            | 0           | 0.078519272  | 0 | 0.91122984   |
| 0 | 0.11157353  | 0 | 0            | 0 | 0            | 0           | 0.078070587  | 0 | 0.90800697   |
| 0 | 0.11186792  | 0 | 0            | 0 | 0            | 0           | 0.079342074  | 0 | 0.91106775   |
| 0 | 0.083647422 | 0 | 0            | 0 | -0.045341289 | 0           | 0.080879337  | 0 | 0.93875303   |
| 0 | 0.096915536 | 0 | -0.021125843 | 0 | 0            | 0           | 0.081030938  | 0 | 0.91992235   |
| 0 | 0.10642873  | 0 | 0            | 0 | 0            | 0           | 0.077994937  | 0 | 0.91663928   |
| 0 | 0.10663242  | 0 | 0            | 0 | 0            | 0           | 0.077348752  | 0 | 0.91289397   |
| 0 | 0.088022802 | 0 | -0.043007372 | 0 | 0            | 0           | 0            | 0 | 1.000011     |
| 0 | 0.084814444 | 0 | 0            | 0 | -0.047673051 | 0           | 0            | 0 | 1.0147288    |
| 0 | 0.050706801 | 0 | 0            | 0 | -0.11511045  | 0           | 0.040436041  | 0 | 1.019107     |
| 0 | 0.087102126 | 0 | 0            | 0 | -0.043535015 | 0           | 0            | 0 | 1.0070238    |
| 0 | 0.048925042 | 0 | 0            | 0 | -0.11763452  | 0           | 0.038087842  | 0 | 1.0200449    |
| 0 | 0.048453508 | 0 | 0            | 0 | -0.11868583  | 0           | 0.03703819   | 0 | 1.0212275    |
| 0 | 0.049075725 | 0 | 0.000480256  | 0 | -0.11806827  | 0           | 0.037598392  | 0 | 1.0202101    |

|   |             |   |              |   |              |   |             |   |              |
|---|-------------|---|--------------|---|--------------|---|-------------|---|--------------|
| 0 | 0           | 0 | 0            | 0 | -0.1105036   | 0 | 0.080785401 | 0 | 1.0232266    |
| 0 | 0.087341425 | 0 | -0.003800506 | 0 | -0.040246864 | 0 | 0           | 0 | 1.0126077    |
| 0 | 0.087250307 | 0 | 0            | 0 | -0.04400472  | 0 | 0           | 0 | 1.0135529    |
| 0 | 0.10881831  | 0 | 0            | 0 | 0            | 0 | 0           | 0 | 0.98355536   |
| 0 | 0.10101273  | 0 | -0.017255299 | 0 | 0            | 0 | 0           | 0 | 0.98812919   |
| 0 | 0.10922106  | 0 | 0            | 0 | 0            | 0 | 0           | 0 | 0.98926223   |
| 0 | 0.10157013  | 0 | -0.016972081 | 0 | 0            | 0 | 0           | 0 | 0.99469272   |
| 0 | 0.083510934 | 0 | -0.042036474 | 0 | 0            | 0 | 0           | 0 | 1.0046639    |
| 0 | 0           | 0 | 0            | 0 | -0.10785942  | 0 | 0.080548945 | 0 | 1.0205886    |
| 0 | 0           | 0 | -0.083207156 | 0 | 0            | 0 | 0.081620923 | 0 | 1.0000287    |
| 0 | 0           | 0 | -0.00521445  | 0 | -0.10325035  | 0 | 0.082098397 | 0 | 1.0222936    |
| 0 | 0           | 0 | 0            | 0 | -0.108457    | 0 | 0.081980627 | 0 | 1.0238508    |
| 0 | 0.10927466  | 0 | 0            | 0 | 0            | 0 | 0           | 0 | 0.983545     |
| 0 | 0.057338327 | 0 | -0.00896722  | 0 | -0.091141955 | 0 | 0           | 0 | 1.0442767    |
| 0 | 0.059597902 | 0 | 0            | 0 | -0.09532798  | 0 | 0           | 0 | 1.0441789    |
| 0 | 0.059693807 | 0 | 0            | 0 | -0.095319349 | 0 | 0           | 0 | 1.0441463    |
| 0 | 0.062897488 | 0 | 0            | 0 | -0.08938882  | 0 | 0           | 0 | 1.0403271    |
| 0 | 0.06345964  | 0 | -0.000321561 | 0 | -0.088121768 | 0 | 0           | 0 | 1.040374     |
| 0 | 0.062916199 | 0 | -0.000194289 | 0 | -0.089332127 | 0 | 0           | 0 | 1.0402092    |
| 0 | 0.081859665 | 0 | 0            | 0 | -0.043471205 | 0 | 0           | 0 | 1.0174801    |
| 0 | 0.097202919 | 0 | -0.045792078 | 0 | 0            | 0 | 0.093860832 | 0 | 0            |
| 0 | 0           | 0 | 0            | 0 | -0.10477015  | 0 | 0.080291115 | 0 | 1.0237323    |
| 0 | 0.083956141 | 0 | 0            | 0 | -0.039871265 | 0 | 0           | 0 | 1.0093111    |
| 0 | 0           | 0 | -0.01214774  | 0 | -0.1312049   | 0 | 0.047557178 | 0 | 1.0561286    |
| 0 | 0           | 0 | 0            | 0 | -0.13933222  | 0 | 0.050785147 | 0 | 1.0561411    |
| 0 | 0           | 0 | 0            | 0 | -0.13883404  | 0 | 0.051538684 | 0 | 1.0566457    |
| 0 | 0.046382328 | 0 | 0            | 0 | -0.11260984  | 0 | 0.038971689 | 0 | 1.0243278    |
| 0 | 0           | 0 | -0.001336814 | 0 | -0.13332427  | 0 | 0.055209419 | 0 | 1.0518682    |
| 0 | 0           | 0 | 0            | 0 | -0.13424374  | 0 | 0.055698171 | 0 | 1.0521309    |
| 0 | 0.044968063 | 0 | -0.001986389 | 0 | -0.1129943   | 0 | 0.036634205 | 0 | 1.0248022    |
| 0 | 0.045134479 | 0 | 0            | 0 | -0.11455031  | 0 | 0.036752806 | 0 | 1.0249657    |
| 0 | 0.084273681 | 0 | -0.006076831 | 0 | -0.034313009 | 0 | 0           | 0 | 1.0149093    |
| 0 | 0           | 0 | -0.001109129 | 0 | -0.13327862  | 0 | 0.055244505 | 0 | 1.0521218    |
| 0 | 0.096075336 | 0 | -0.017590805 | 0 | 0            | 0 | 0           | 0 | 0.99226468   |
| 0 | 0           | 0 | -0.080879689 | 0 | 0            | 0 | 0.081302921 | 0 | 1.0010313    |
| 0 | 0.10399529  | 0 | 0            | 0 | 0            | 0 | 0           | 0 | 0.98760543   |
| 0 | 0           | 0 | 0            | 0 | -0.10253979  | 0 | 0.07986503  | 0 | 1.0205622    |
| 0 | 0           | 0 | -0.007518231 | 0 | -0.095752283 | 0 | 0.081734916 | 0 | 1.0220889    |
| 0 | 0.097135927 | 0 | 0            | 0 | -0.044385942 | 0 | 0.092501928 | 0 | 0            |
| 0 | 0.099134717 | 0 | 0            | 0 | -0.040727932 | 0 | 0.091773692 | 0 | 0            |
| 0 | 0.099515859 | 0 | -0.009409335 | 0 | -0.031862385 | 0 | 0.093791327 | 0 | 0            |
| 0 | 0.053665748 | 0 | -0.010181431 | 0 | -0.086798104 | 0 | 0           | 0 | 1.0477085    |
| 0 | 0.055948118 | 0 | 0            | 0 | -0.092210069 | 0 | 0           | 0 | 1.0473512    |
| 0 | 0.099209423 | 0 | 0            | 0 | -0.041241214 | 0 | 0.093313334 | 0 | 0            |
| 0 | 0.058220987 | 0 | -0.002477564 | 0 | -0.085926171 | 0 | 0           | 0 | 1.0440658    |
| 0 | 0.11016636  | 0 | -0.019989046 | 0 | 0            | 0 | 0.091666477 | 0 | 0            |
| 0 | 0.088891493 | 0 | -0.048168487 | 0 | 0            | 0 | 0.094709718 | 0 | -0.098261117 |

|   |             |   |              |   |              |             |             |              |
|---|-------------|---|--------------|---|--------------|-------------|-------------|--------------|
| 0 | 0           | 0 | -0.039088984 | 0 | -0.069717781 | 0           | 0           | 1.090997     |
| 0 | 0.11057476  | 0 | -0.019897595 | 0 | 0            | 0.093279607 | 0           | 0            |
| 0 | 0.11920817  | 0 | 0            | 0 | 0            | 0.088952425 | 0           | 0            |
| 0 | 0           | 0 | -0.012849022 | 0 | -0.12547304  | 0           | 0.046396564 | 1.0573354    |
| 0 | 0.11955902  | 0 | 0            | 0 | 0            | 0.090272014 | 0           | 0            |
| 0 | 0.092494798 | 0 | -0.044804607 | 0 | 0            | 0.093353731 | 0           | 0            |
| 0 | 0           | 0 | 0            | 0 | -0.13380068  | 0           | 0.049982309 | 1.0577737    |
| 0 | 0           | 0 | -0.003309334 | 0 | -0.12753182  | 0           | 0.052774985 | 1.0538516    |
| 0 | 0           | 0 | -0.024145414 | 0 | -0.10060141  | 0           | 0           | 1.0946945    |
| 0 | 0           | 0 | -0.025826161 | 0 | -0.097599365 | 0           | 0           | 1.0965223    |
| 0 | 0.11960459  | 0 | 0            | 0 | 0            | 0.089572092 | 0           | 0            |
| 0 | 0           | 0 | 0            | 0 | -0.10524707  | 0           | 0           | 1.0954251    |
| 0 | 0           | 0 | 0            | 0 | -0.11523176  | 0           | 0           | 1.0986424    |
| 0 | 0           | 0 | 0            | 0 | -0.10589562  | 0           | 0           | 1.1014124    |
| 0 | 0.085682147 | 0 | 0            | 0 | -0.052614462 | 0           | 0.09340516  | -0.085312769 |
| 0 | 0.0878186   | 0 | 0            | 0 | -0.048904964 | 0           | 0.092994605 | -0.089848227 |
| 0 | 0.088125375 | 0 | -0.007760643 | 0 | -0.041607174 | 0           | 0.094669572 | -0.088802999 |
| 0 | 0.094020734 | 0 | 0            | 0 | -0.040094786 | 0           | 0.091840776 | 0            |
| 0 | 0.087802759 | 0 | 0            | 0 | -0.049406784 | 0           | 0.094275785 | -0.087002209 |
| 0 | 0           | 0 | -0.078373855 | 0 | 0            | 0           | 0           | 1.0743557    |
| 0 | 0           | 0 | -0.002755209 | 0 | -0.10024233  | 0           | 0           | 1.0955189    |
| 0 | 0           | 0 | 0            | 0 | -0.10295109  | 0           | 0           | 1.0961943    |
| 0 | 0           | 0 | -0.002645491 | 0 | -0.10028059  | 0           | 0           | 1.0954145    |
| 0 | 0           | 0 | -0.040390575 | 0 | -0.062985846 | 0           | 0           | 1.0905985    |
| 0 | 0.095834519 | 0 | 0            | 0 | -0.036912569 | 0           | 0.090898621 | 0            |
| 0 | 0.10498358  | 0 | -0.020366497 | 0 | 0            | 0.091067314 | 0           | 0            |
| 0 | 0.096300709 | 0 | -0.011783519 | 0 | -0.02576608  | 0           | 0.093252542 | 0            |
| 0 | 0           | 0 | -0.078911664 | 0 | 0            | 0           | 0           | 1.0801581    |
| 0 | 0           | 0 | -0.002122323 | 0 | -0.10147372  | 0           | 0           | 1.102608     |
| 0 | 0.10242886  | 0 | -0.021497567 | 0 | 0            | 0.092845001 | 0           | -0.10882998  |
| 0 | 0.084208404 | 0 | -0.04720511  | 0 | 0            | 0.094145946 | 0           | -0.092905227 |
| 0 | 0           | 0 | -0.049167652 | 0 | 0            | 0.078981352 | 0           | 1.00845      |
| 0 | 0.10273604  | 0 | -0.021437298 | 0 | 0            | 0.094221181 | 0           | -0.10597221  |
| 0 | 0.11417519  | 0 | 0            | 0 | 0            | 0.088301255 | 0           | 0            |
| 0 | 0           | 0 | -0.024104255 | 0 | -0.096574375 | 0           | 0           | 1.094538     |
| 0 | 0           | 0 | -0.049314776 | 0 | 0            | 0.080795145 | 0           | 1.0127414    |
| 0 | 0.11220869  | 0 | 0            | 0 | 0            | 0.090037142 | 0           | -0.11436279  |
| 0 | 0.11248227  | 0 | 0            | 0 | 0            | 0.091121662 | 0           | -0.11194701  |
| 0 | 0           | 0 | 0            | 0 | -0.099641998 | 0           | 0           | 1.094695     |
| 0 | 0.1126095   | 0 | 0            | 0 | 0            | 0.090671128 | 0           | -0.11478995  |
| 0 | 0           | 0 | -0.076069825 | 0 | 0            | 0           | 0           | 1.0743801    |
| 0 | 0           | 0 | -0.048519424 | 0 | 0            | 0.078712405 | 0           | 1.0084809    |
| 0 | 0.08253286  | 0 | 0            | 0 | -0.048440778 | 0           | 0.092727545 | -0.081669202 |
| 0 | 0           | 0 | -0.004895049 | 0 | -0.092959149 | 0           | 0           | 1.0941683    |
| 0 | 0.08449164  | 0 | 0            | 0 | -0.045198537 | 0           | 0.092105901 | -0.086542006 |
| 0 | 0.084886877 | 0 | -0.010107886 | 0 | -0.03563969  | 0           | 0.094113026 | -0.085579141 |
| 0 | 0.097301926 | 0 | -0.021882315 | 0 | 0            | 0.092204597 | 0           | -0.10378608  |

|   |             |   |              |   |              |   |              |   |              |
|---|-------------|---|--------------|---|--------------|---|--------------|---|--------------|
| 0 | 0.02557827  | 0 | -0.028886274 | 0 | -0.068650507 | 0 | 0.092537938  | 0 | 0            |
| 0 | 0.097610011 | 0 | -0.040206404 | 0 | 0            | 0 | 0            | 0 | 0            |
| 0 | 0.10723367  | 0 | 0            | 0 | 0            | 0 | 0.089336908  | 0 | -0.10937949  |
| 0 | 0.097856307 | 0 | -0.04069741  | 0 | 0            | 0 | 0            | 0 | 0            |
| 0 | 0.097082863 | 0 | -0.039670276 | 0 | -0.002413874 | 0 | 0            | 0 | 0            |
| 0 | 0.029664239 | 0 | 0            | 0 | -0.092474399 | 0 | 0.091733635  | 0 | 0            |
| 0 | 0.029963433 | 0 | 0            | 0 | -0.092261625 | 0 | 0.091782192  | 0 | 0            |
| 0 | 0.079134535 | 0 | -0.057001965 | 0 | 0            | 0 | -0.010278278 | 0 | 1.0363669    |
| 0 | 0           | 0 | -0.04701637  | 0 | -0.067714437 | 0 | 0.095321264  | 0 | 0            |
| 0 | 0.076925286 | 0 | -0.061322773 | 0 | 0            | 0 | 0            | 0 | 1.0305074    |
| 0 | 0.074144121 | 0 | -0.067030131 | 0 | 0            | 0 | 0            | 0 | 1.032704     |
| 0 | 0           | 0 | -0.044011711 | 0 | -0.070809658 | 0 | 0.095044074  | 0 | -0.01193259  |
| 0 | 0.098304671 | 0 | 0            | 0 | -0.037499934 | 0 | 0            | 0 | 0            |
| 0 | 0           | 0 | -0.038766218 | 0 | -0.075963157 | 0 | 0.093666491  | 0 | 0            |
| 0 | 0           | 0 | -0.03936909  | 0 | -0.075668216 | 0 | 0.094402077  | 0 | 0            |
| 0 | 0.030891613 | 0 | 0.000728553  | 0 | -0.090392221 | 0 | 0.092603055  | 0 | 0            |
| 0 | 0.030726991 | 0 | 0            | 0 | -0.08978782  | 0 | 0.092588988  | 0 | 0            |
| 0 | 0.030931948 | 0 | 0.000851612  | 0 | -0.090372537 | 0 | 0.092409237  | 0 | 0            |
| 0 | 0.098533694 | 0 | 0            | 0 | -0.038037849 | 0 | 0            | 0 | 0            |
| 0 | 0.075591444 | 0 | -0.061173423 | 0 | 0            | 0 | -0.022286869 | 0 | 1.0407121    |
| 0 | 0.074043067 | 0 | -0.064359529 | 0 | 0            | 0 | -0.024596588 | 0 | 1.0432775    |
| 0 | 0.1006678   | 0 | -0.006706266 | 0 | -0.027423772 | 0 | 0            | 0 | 0            |
| 0 | 0.10054114  | 0 | 0            | 0 | -0.034037344 | 0 | 0            | 0 | 0            |
| 0 | 0.11731994  | 0 | 0            | 0 | 0            | 0 | 0            | 0 | 0            |
| 0 | 0.030573154 | 0 | -0.06423111  | 0 | 0            | 0 | 0.091596066  | 0 | 0            |
| 0 | 0.024559032 | 0 | -0.030764466 | 0 | -0.061813365 | 0 | 0.092145235  | 0 | 0            |
| 0 | 0.029632776 | 0 | -0.064326978 | 0 | 0            | 0 | 0.091004261  | 0 | 0            |
| 0 | 0.057457532 | 0 | 0            | 0 | -0.11858878  | 0 | 0.046114815  | 0 | 0            |
| 0 | 0.11024984  | 0 | -0.015692153 | 0 | 0            | 0 | 0            | 0 | 0            |
| 0 | 0.057589621 | 0 | -0.000914571 | 0 | -0.11774247  | 0 | 0.045700618  | 0 | 0            |
| 0 | 0.057749767 | 0 | 0            | 0 | -0.11831881  | 0 | 0.045819065  | 0 | 0            |
| 0 | 0           | 0 | 0            | 0 | -0.11053676  | 0 | 0.092465641  | 0 | 0            |
| 0 | 0.056265558 | 0 | 0            | 0 | -0.12030573  | 0 | 0.043620031  | 0 | 0            |
| 0 | 0.055622643 | 0 | -0.001098289 | 0 | -0.12039225  | 0 | 0.043062363  | 0 | 0            |
| 0 | 0.056492564 | 0 | 0.000526802  | 0 | -0.12065948  | 0 | 0.043179123  | 0 | 0            |
| 0 | 0.10097996  | 0 | -0.005962778 | 0 | -0.028612808 | 0 | 0            | 0 | 0            |
| 0 | 0           | 0 | 0            | 0 | -0.11120941  | 0 | 0.093906831  | 0 | 0            |
| 0 | 0           | 0 | 0            | 0 | 0            | 0 | 0.072131253  | 0 | 1.0250722    |
| 0 | 0           | 0 | 0            | 0 | -0.11097097  | 0 | 0.092476819  | 0 | -0.005431233 |
| 0 | 0.09311661  | 0 | -0.039160554 | 0 | 0            | 0 | 0            | 0 | 0            |
| 0 | 0           | 0 | 0            | 0 | -0.11136877  | 0 | 0.092517501  | 0 | 0            |
| 0 | 0.088518984 | 0 | -0.042825359 | 0 | 0            | 0 | 0            | 0 | -0.097924333 |
| 0 | 0           | 0 | 0            | 0 | -0.11149627  | 0 | 0.093637373  | 0 | -0.003062933 |
| 0 | 0           | 0 | 0            | 0 | 0            | 0 | 0.073590345  | 0 | 1.0288725    |
| 0 | 0.074281074 | 0 | -0.057190265 | 0 | 0            | 0 | -0.009647651 | 0 | 1.039865     |
| 0 | 0.070285959 | 0 | -0.071445888 | 0 | 0            | 0 | 0            | 0 | 1.0246399    |
| 0 | 0           | 0 | -0.085153505 | 0 | 0            | 0 | 0.093219856  | 0 | 0            |



|   |             |   |              |   |              |              |             |              |
|---|-------------|---|--------------|---|--------------|--------------|-------------|--------------|
| 0 | 0.084710786 | 0 | -0.037188853 | 0 | -0.013541059 | 0            | 0           | -0.088862213 |
| 0 | 0.069936178 | 0 | -0.065851181 | 0 | 0            | 0            | 0           | 1.0361609    |
| 0 | 0.088674672 | 0 | -0.043270911 | 0 | 0            | 0            | 0           | -0.094037964 |
| 0 | 0           | 0 | -0.085681885 | 0 | 0            | 0.09464829   | 0           | 0            |
| 0 | 0.028822028 | 0 | 0            | 0 | -0.087025846 | 0            | 0.091044108 | 0            |
| 0 | 0           | 0 | -0.045516249 | 0 | 0            | 0            | 0           | 1.0835161    |
| 0 | 0           | 0 | -0.04834125  | 0 | -0.060871012 | 0            | 0.094894874 | 0            |
| 0 | 0.094147131 | 0 | -0.041185481 | 0 | 0.00317756   | 0            | 0           | 0            |
| 0 | 0           | 0 | 0            | 0 | 0            | 0.072928266  | 0           | 1.0249576    |
| 0 | 0           | 0 | -0.008085893 | 0 | -0.10044165  | 0            | 0.093618589 | 0            |
| 0 | 0           | 0 | -0.045334261 | 0 | -0.063976957 | 0            | 0.09461437  | 0            |
| 0 | 0           | 0 | 0            | 0 | -0.10845001  | 0            | 0.093383798 | 0            |
| 0 | 0           | 0 | -0.084035886 | 0 | 0            | 0.09331003   | 0           | -0.023184852 |
| 0 | 0.047917088 | 0 | 0            | 0 | -0.12198046  | 0            | 0.05009854  | 0            |
| 0 | 0.047625316 | 0 | 0            | 0 | -0.12273289  | 0            | 0.049319653 | 0            |
| 0 | 0.048103428 | 0 | 0.000356923  | 0 | -0.12223871  | 0            | 0.0496998   | 0            |
| 0 | 0           | 0 | -0.039963856 | 0 | -0.069214074 | 0            | 0.093040814 | 0            |
| 0 | 0           | 0 | -0.084469569 | 0 | 0            | 0.094446745  | 0           | -0.020963577 |
| 0 | 0           | 0 | -0.007818918 | 0 | -0.10142627  | 0            | 0.095423894 | 0            |
| 0 | 0.08582998  | 0 | 0            | 0 | -0.046495297 | 0            | 0           | -0.086737281 |
| 0 | 0           | 0 | -0.006359415 | 0 | -0.10255249  | 0            | 0.093559089 | 0            |
| 0 | 0           | 0 | 0            | 0 | -0.10887918  | 0            | 0.093396511 | 0            |
| 0 | 0.045992412 | 0 | 0            | 0 | -0.12494139  | 0            | 0.046857006 | 0            |
| 0 | 0.046006035 | 0 | 0.000174966  | 0 | -0.12507526  | 0            | 0.046869825 | 0            |
| 0 | 0           | 0 | -0.005046138 | 0 | -0.10432803  | 0            | 0.093546074 | 0            |
| 0 | 0.046210961 | 0 | 0.000515792  | 0 | -0.12530748  | 0            | 0.046410303 | 0            |
| 0 | 0           | 0 | 0            | 0 | 0            | 0.071901264  | 0           | 1.0248695    |
| 0 | 0.0699649   | 0 | -0.063460991 | 0 | 0            | -0.022523023 | 0           | 1.0457308    |
| 0 | 0           | 0 | -0.00615712  | 0 | -0.1033693   | 0            | 0.095042762 | 0            |
| 0 | 0.029422792 | 0 | -0.001724713 | 0 | -0.083316449 | 0            | 0.091809808 | 0            |
| 0 | 0.095382264 | 0 | 0            | 0 | -0.033233674 | 0            | 0           | 0            |
| 0 | 0.085970128 | 0 | 0            | 0 | -0.046977854 | 0            | 0           | -0.082621464 |
| 0 | 0.028928588 | 0 | -0.062725273 | 0 | 0            | 0.091096174  | 0           | 0            |
| 0 | 0           | 0 | -0.08066777  | 0 | 0            | 0.092578423  | 0           | 0            |
| 0 | 0.088260721 | 0 | -0.004789288 | 0 | -0.038176645 | 0            | 0           | -0.090154489 |
| 0 | 0.097654872 | 0 | -0.009017092 | 0 | -0.021400119 | 0            | 0           | 0            |
| 0 | 0.088142919 | 0 | 0            | 0 | -0.042922668 | 0            | 0           | -0.089081216 |
| 0 | 0.067416463 | 0 | -0.008780837 | 0 | -0.088857323 | 0            | 0           | 0            |
| 0 | 0.06753332  | 0 | -0.008693838 | 0 | -0.08889526  | 0            | 0           | 0            |
| 0 | 0           | 0 | 0            | 0 | -0.10477651  | 0            | 0.091778902 | 0            |
| 0 | 0           | 0 | -0.082783863 | 0 | 0            | 0.092741578  | 0           | 0            |
| 0 | 0.069429336 | 0 | 0            | 0 | -0.093461305 | 0            | 0           | 0            |
| 0 | 0.022470719 | 0 | 0            | 0 | -0.13294083  | 0            | 0.057175748 | 0            |
| 0 | 0.071534873 | 0 | -0.001781271 | 0 | -0.087952517 | 0            | 0           | 0            |
| 0 | 0.022282848 | 0 | -0.001743847 | 0 | -0.13187119  | 0            | 0.056500201 | 0            |
| 0 | 0.023571853 | 0 | 0.003472504  | 0 | -0.13285756  | 0            | 0.059205229 | 0            |
| 0 | 0.088426038 | 0 | -0.004123557 | 0 | -0.039327248 | 0            | 0           | -0.085354631 |

|   |             |   |              |   |              |   |              |   |              |
|---|-------------|---|--------------|---|--------------|---|--------------|---|--------------|
| 0 | 0           | 0 | 0            | 0 | -0.10521838  | 0 | 0.091786889  | 0 | -0.00535184  |
| 0 | 0.01976316  | 0 | -5.45E-05    | 0 | -0.13596895  | 0 | 0.053868626  | 0 | 0            |
| 0 | 0.10960227  | 0 | 0            | 0 | 0            | 0 | 0            | 0 | -0.11065556  |
| 0 | 0.10173154  | 0 | -0.017296033 | 0 | 0            | 0 | 0            | 0 | -0.10619598  |
| 0 | 0.084075441 | 0 | -0.041816922 | 0 | 0            | 0 | 0            | 0 | -0.093279639 |
| 0 | 0.053121389 | 0 | -0.003432382 | 0 | -0.11302335  | 0 | 0.044192077  | 0 | 0            |
| 0 | 0.054104123 | 0 | 0            | 0 | -0.11452433  | 0 | 0.044943519  | 0 | 0            |
| 0 | 0           | 0 | -0.081676225 | 0 | 0            | 0 | 0.092818577  | 0 | -0.022548841 |
| 0 | 0.052843475 | 0 | -0.001006024 | 0 | -0.11555674  | 0 | 0.042668994  | 0 | 0            |
| 0 | 0           | 0 | -0.010416345 | 0 | -0.092941868 | 0 | 0.093077171  | 0 | 0            |
| 0 | 0.081761167 | 0 | -0.038679086 | 0 | -0.008081941 | 0 | 0            | 0 | -0.085756481 |
| 0 | 0           | 0 | -0.008692234 | 0 | -0.095037952 | 0 | 0.093017302  | 0 | -0.007250337 |
| 0 | 0           | 0 | -0.012605497 | 0 | -0.13604126  | 0 | 0.056594129  | 0 | 0            |
| 0 | 0           | 0 | -0.013202781 | 0 | -0.13500786  | 0 | 0.05747606   | 0 | 0            |
| 0 | 0           | 0 | -0.011340039 | 0 | -0.1358885   | 0 | 0.059022463  | 0 | 0            |
| 0 | 0           | 0 | 0            | 0 | -0.14412177  | 0 | 0.060361848  | 0 | 0            |
| 0 | 0           | 0 | -0.010287238 | 0 | -0.13760583  | 0 | 0.057130927  | 0 | -0.00185744  |
| 0 | 0           | 0 | -0.011220541 | 0 | -0.13605615  | 0 | 0.058537674  | 0 | -0.000313356 |
| 0 | 0           | 0 | 0            | 0 | -0.14378479  | 0 | 0.061038229  | 0 | 0.001281562  |
| 0 | 0           | 0 | -0.002985019 | 0 | -0.13786464  | 0 | 0.063203939  | 0 | 0            |
| 0 | 0           | 0 | -0.001360086 | 0 | -0.13880583  | 0 | 0.064066116  | 0 | 0.000380106  |
| 0 | 0.10628152  | 0 | 0            | 0 | 0            | 0 | -0.025662003 | 0 | 1.0397334    |
| 0 | 0.082901105 | 0 | 0            | 0 | -0.042325968 | 0 | 0            | 0 | -0.083818463 |
| 0 | 0.057696432 | 0 | -0.009484078 | 0 | -0.091208535 | 0 | 0            | 0 | -0.055503623 |
| 0 | 0.057868701 | 0 | -0.009469609 | 0 | -0.091082846 | 0 | 0            | 0 | -0.055448273 |
| 0 | 0.041421071 | 0 | -0.032778367 | 0 | 0            | 0 | 0.090303061  | 0 | 0            |
| 0 | 0.05993935  | 0 | 0            | 0 | -0.096071079 | 0 | 0            | 0 | -0.056033478 |
| 0 | 0.043666021 | 0 | -0.002120813 | 0 | -0.11758612  | 0 | 0.0482114    | 0 | -0.038384405 |
| 0 | 0.043996782 | 0 | 0            | 0 | -0.11898608  | 0 | 0.048447113  | 0 | -0.03835295  |
| 0 | 0.063064612 | 0 | -0.000541896 | 0 | -0.089930502 | 0 | 0            | 0 | -0.059677437 |
| 0 | 0.042584775 | 0 | -0.001009405 | 0 | -0.12024735  | 0 | 0.04589759   | 0 | -0.039344988 |
| 0 | 0.08524196  | 0 | -0.007077031 | 0 | -0.032262462 | 0 | 0            | 0 | -0.087604968 |
| 0 | 0           | 0 | -0.095462807 | 0 | 0            | 0 | 0            | 0 | 1.0977342    |
| 0 | 0           | 0 | -0.09405121  | 0 | 0            | 0 | -0.007334479 | 0 | 1.1032165    |
| 0 | 0           | 0 | 0            | 0 | 0            | 0 | 0            | 0 | 1.092771     |
| 0 | 0.10649752  | 0 | 0            | 0 | 0            | 0 | 0            | 0 | 1.0216563    |
| 0 | 0.10492017  | 0 | 0            | 0 | 0            | 0 | -0.037319812 | 0 | 1.0417725    |
| 0 | 0.020640597 | 0 | -0.002896182 | 0 | -0.12669889  | 0 | 0.05491566   | 0 | 0            |
| 0 | 0.063574176 | 0 | -0.009602826 | 0 | -0.08525255  | 0 | 0            | 0 | 0            |
| 0 | 0.027249663 | 0 | -0.025217177 | 0 | -0.065343418 | 0 | 0            | 0 | 0            |
| 0 | 0.028037972 | 0 | -0.025511507 | 0 | -0.064722321 | 0 | 0            | 0 | 0            |
| 0 | 0           | 0 | -0.0939518   | 0 | 0            | 0 | -0.017342428 | 0 | 1.1035716    |
| 0 | 0.052029089 | 0 | 0            | 0 | 0            | 0 | 0.085904217  | 0 | 0            |
| 0 | 0.030689505 | 0 | 0            | 0 | -0.086200014 | 0 | 0            | 0 | 0            |
| 0 | 0.10177872  | 0 | 0            | 0 | 0            | 0 | -0.024611223 | 0 | 1.042403     |
| 0 | 0           | 0 | -0.013637962 | 0 | -0.12964307  | 0 | 0.055878452  | 0 | 0            |
| 0 | 0           | 0 | -0.011650261 | 0 | -0.130704    | 0 | 0.056932762  | 0 | -0.000119074 |

|   |             |   |              |   |              |   |              |   |              |
|---|-------------|---|--------------|---|--------------|---|--------------|---|--------------|
| 0 | 0           | 0 | -0.091827027 | 0 | 0            | 0 | -0.006481886 | 0 | 1.102399     |
| 0 | 0           | 0 | -0.074918109 | 0 | 0            | 0 | 0.002364876  | 0 | 1.0966902    |
| 0 | 0.025049731 | 0 | -0.012211289 | 0 | -0.098133573 | 0 | 0            | 0 | 0            |
| 0 | 0           | 0 | -0.042882769 | 0 | -0.065289483 | 0 | 0            | 0 | 0            |
| 0 | 0.10423887  | 0 | 0            | 0 | 0            | 0 | -0.046424697 | 0 | 1.0658235    |
| 0 | 0.053946529 | 0 | -0.010365281 | 0 | -0.087508669 | 0 | 0            | 0 | -0.051629765 |
| 0 | 0           | 0 | -0.04335091  | 0 | -0.065632642 | 0 | 0            | 0 | 0            |
| 0 | 0           | 0 | -0.03969297  | 0 | -0.06870346  | 0 | 0            | 0 | -0.012160654 |
| 0 | 0.032037439 | 0 | 0.003939929  | 0 | -0.086918343 | 0 | 0            | 0 | 0            |
| 0 | 0           | 0 | -0.035321631 | 0 | -0.07347019  | 0 | 0            | 0 | 0            |
| 0 | 0           | 0 | -0.040133628 | 0 | -0.068911165 | 0 | 0            | 0 | -0.008140457 |
| 0 | 0           | 0 | -0.050988696 | 0 | 0            | 0 | 0.091856346  | 0 | 0            |
| 0 | 0           | 0 | -0.026362522 | 0 | -0.10069219  | 0 | 0            | 0 | 0            |
| 0 | 0.031622865 | 0 | -0.058936054 | 0 | 0            | 0 | 0            | 0 | 0            |
| 0 | 0.025968975 | 0 | -0.026908132 | 0 | -0.058913062 | 0 | 0            | 0 | 0            |
| 0 | 0           | 0 | -0.024535899 | 0 | -0.10114894  | 0 | 0            | 0 | -0.005811675 |
| 0 | 0           | 0 | -0.05017436  | 0 | 0            | 0 | 0.091887964  | 0 | -0.017838332 |
| 0 | 0           | 0 | 0            | 0 | -0.1049461   | 0 | 0            | 0 | 0            |
| 0 | 0           | 0 | 0            | 0 | -0.10541425  | 0 | 0            | 0 | -0.004373279 |
| 0 | 0           | 0 | -0.080145823 | 0 | 0            | 0 | 0            | 0 | 0            |
| 0 | 0           | 0 | -0.044113536 | 0 | -0.058680847 | 0 | 0            | 0 | 0            |
| 0 | 0           | 0 | -0.040927681 | 0 | -0.062084973 | 0 | 0            | 0 | -0.012324188 |
| 0 | 0           | 0 | -0.004995781 | 0 | -0.097700027 | 0 | 0            | 0 | 0            |
| 0 | 0           | 0 | -0.078906452 | 0 | 0            | 0 | 0            | 0 | -0.021074931 |
| 0 | 0           | 0 | -0.003113205 | 0 | -0.10000735  | 0 | 0            | 0 | -0.005156184 |
| 0 | 0.086419571 | 0 | -0.059694359 | 0 | 0            | 0 | -0.005373317 | 0 | 0            |
| 0 | 0.084432525 | 0 | -0.063799557 | 0 | 0            | 0 | -0.0073328   | 0 | 0            |
| 0 | 0.083439753 | 0 | -0.065586913 | 0 | 0            | 0 | 0            | 0 | 0            |
| 0 | 0.082791042 | 0 | -0.064309767 | 0 | 0            | 0 | -0.018709348 | 0 | 0            |
| 0 | 0           | 0 | 0            | 0 | 0            | 0 | 0.084888482  | 0 | 0            |
| 0 | 0           | 0 | 0            | 0 | 0            | 0 | 0.084916049  | 0 | -0.00944499  |
| 0 | 0.07427872  | 0 | -0.067751317 | 0 | 0            | 0 | 0            | 0 | -0.073049621 |
| 0 | 0.075058958 | 0 | -0.066384746 | 0 | 0            | 0 | -0.005567709 | 0 | -0.073940402 |
| 0 | 0.077854826 | 0 | -0.06079386  | 0 | 0            | 0 | -0.003095629 | 0 | -0.07611243  |
| 0 | 0.080095162 | 0 | -0.062825928 | 0 | 0            | 0 | -0.006288477 | 0 | 0            |
| 0 | 0.073298387 | 0 | -0.066935315 | 0 | 0            | 0 | -0.017653534 | 0 | -0.080114921 |
| 0 | 0.070788214 | 0 | -0.065439509 | 0 | 0            | 0 | -0.004544296 | 0 | -0.069784987 |
| 0 | 0.11505341  | 0 | 0            | 0 | 0            | 0 | -0.01992665  | 0 | 0            |
| 0 | 0.08008416  | 0 | -0.021119809 | 0 | 0.057295068  | 0 | 0.053095069  | 0 | 0.93509926   |
| 0 | 0.079281579 | 0 | 0            | 0 | 0.037548212  | 0 | 0.049538445  | 0 | 0.93642703   |
| 0 | 0.031783471 | 0 | -0.077636376 | 0 | 0            | 0 | 0.000560158  | 0 | 0            |
| 0 | 0.078105189 | 0 | 0            | 0 | 0.036008113  | 0 | 0.050886864  | 0 | 0.94290246   |
| 0 | 0.077015599 | 0 | -0.049720632 | 0 | 0.079179086  | 0 | 0            | 0 | 0.98167467   |
| 0 | 0.056096669 | 0 | 0            | 0 | 0            | 0 | 0.048870329  | 0 | 0.95875355   |
| 0 | 0.049490337 | 0 | -0.012032804 | 0 | 0            | 0 | 0.051121864  | 0 | 0.9666335    |
| 0 | 0.05600356  | 0 | -0.001024447 | 0 | 0            | 0 | 0.049483759  | 0 | 0.95843791   |
| 0 | 0.08038216  | 0 | -0.019198701 | 0 | 0.055487509  | 0 | 0            | 0 | 0.97868849   |

|   |             |   |              |   |              |   |              |   |              |
|---|-------------|---|--------------|---|--------------|---|--------------|---|--------------|
| 0 | 0           | 0 | -0.097710888 | 0 | 0            | 0 | -0.000281853 | 0 | 0            |
| 0 | 0.10694961  | 0 | 0            | 0 | 0            | 0 | -0.018578033 | 0 | -0.091634886 |
| 0 | 0.078452228 | 0 | 0            | 0 | 0.036001148  | 0 | 0            | 0 | 0.9844892    |
| 0 | 0           | 0 | -0.09633901  | 0 | 0            | 0 | 0.000410744  | 0 | -0.00971086  |
| 0 | 0           | 0 | 0            | 0 | 0            | 0 | -0.026521414 | 0 | 1.1463652    |
| 0 | 0.050884598 | 0 | -0.010183947 | 0 | 0            | 0 | 0            | 0 | 1.008181     |
| 0 | 0           | 0 | -0.054983953 | 0 | 0.030491731  | 0 | 0.053819124  | 0 | 1.0061247    |
| 0 | 0           | 0 | -0.034805971 | 0 | 0            | 0 | 0.050968634  | 0 | 1.006322     |
| 0 | 0           | 0 | -0.019836301 | 0 | 0.000360136  | 0 | 0.051655171  | 0 | 1.0115008    |
| 0 | 0           | 0 | 0            | 0 | -0.018511438 | 0 | 0.049534501  | 0 | 1.0173642    |
| 0 | 0           | 0 | -0.051581206 | 0 | 0.02714992   | 0 | 0            | 0 | 1.0522058    |
| 0 | 0.088710155 | 0 | -0.056154462 | 0 | 0.093224543  | 0 | 0.064979512  | 0 | 0            |
| 0 | 0.092259719 | 0 | -0.024154235 | 0 | 0.068338241  | 0 | 0.062551352  | 0 | 0            |
| 0 | 0.090487867 | 0 | 0            | 0 | 0.0444445262 | 0 | 0.060506957  | 0 | 0            |
| 0 | 0.077464148 | 0 | -0.053869917 | 0 | 0.082688819  | 0 | 0.065872946  | 0 | -0.081029403 |
| 0 | 0.090008102 | 0 | -0.052242924 | 0 | 0.090213497  | 0 | 0            | 0 | 0            |
| 0 | 0.058395754 | 0 | -0.009518259 | 0 | 0            | 0 | 0.060998886  | 0 | 0            |
| 0 | 0.080951798 | 0 | -0.022387526 | 0 | 0.058167305  | 0 | 0.063726139  | 0 | -0.082866547 |
| 0 | 0.079058386 | 0 | 0            | 0 | 0.035798888  | 0 | 0.061665079  | 0 | -0.076390718 |
| 0 | 0.050272616 | 0 | -0.012571491 | 0 | 0            | 0 | 0.061954938  | 0 | -0.049526722 |
| 0 | 0.078085057 | 0 | -0.049830515 | 0 | 0.079004986  | 0 | 0            | 0 | -0.084843988 |
| 0 | 0.024673879 | 0 | -0.042379455 | 0 | 0.033205784  | 0 | 0.06353019   | 0 | 0            |
| 0 | 0           | 0 | -0.058722759 | 0 | 0.033534395  | 0 | 0.064735198  | 0 | 0            |
| 0 | 0           | 0 | -0.05579403  | 0 | 0.030322897  | 0 | 0.064747433  | 0 | -0.011678047 |
| 0 | 0.015305273 | 0 | 0            | 0 | -0.06000545  | 0 | -0.027779665 | 0 | 1.0910004    |
| 0 | 0.015622736 | 0 | 0.0099304    | 0 | -0.068490569 | 0 | -0.02944796  | 0 | 1.0900825    |
| 0 | 0           | 0 | 0.004407664  | 0 | -0.070878634 | 0 | -0.022259284 | 0 | 1.1014       |
| 0 | 0.009158198 | 0 | 0.013734225  | 0 | -0.081483689 | 0 | 0            | 0 | 1.0755039    |
| 0 | 0.007584854 | 0 | -0.010078841 | 0 | -0.061648773 | 0 | -0.034718908 | 0 | 1.1035792    |
| 0 | 0.034110322 | 0 | -0.02870777  | 0 | 0            | 0 | -0.053446561 | 0 | 1.0977993    |
| 0 | 0.025151791 | 0 | 0.01025315   | 0 | -0.067072094 | 0 | -0.020914421 | 0 | 0            |
| 0 | 0.014780848 | 0 | 0.009849896  | 0 | -0.071945861 | 0 | -0.01686103  | 0 | 0.003587112  |
| 0 | 0.088314345 | 0 | -0.047223024 | 0 | 0            | 0 | 0.082072764  | 0 | 0.91926434   |
| 0 | 0.084775484 | 0 | 0            | 0 | -0.052342023 | 0 | 0.080767755  | 0 | 0.93668373   |
| 0 | 0.086913667 | 0 | 0            | 0 | -0.048645276 | 0 | 0.080396324  | 0 | 0.93188723   |
| 0 | 0.087195524 | 0 | -0.006959407 | 0 | -0.042129569 | 0 | 0.08199645   | 0 | 0.93268299   |
| 0 | 0.086886271 | 0 | 0            | 0 | -0.049145147 | 0 | 0.081645769  | 0 | 0.93501105   |
| 0 | 0.10169352  | 0 | -0.02086474  | 0 | 0            | 0 | 0.080213718  | 0 | 0.91136635   |
| 0 | 0.10198599  | 0 | -0.020811684 | 0 | 0            | 0 | 0.081556499  | 0 | 0.91454717   |
| 0 | 0.083637574 | 0 | -0.046280637 | 0 | 0            | 0 | 0.081525824  | 0 | 0.92470613   |
| 0 | 0.11117097  | 0 | 0            | 0 | 0            | 0 | 0.077434155  | 0 | 0.90854811   |
| 0 | 0.11143333  | 0 | 0            | 0 | 0            | 0 | 0.078488581  | 0 | 0.91119494   |
| 0 | 0.11156809  | 0 | 0            | 0 | 0            | 0 | 0.078076761  | 0 | 0.9080142    |
| 0 | 0.081618381 | 0 | 0            | 0 | -0.048181755 | 0 | 0.080094746  | 0 | 0.94040868   |
| 0 | 0.083577664 | 0 | 0            | 0 | -0.044948444 | 0 | 0.079511699  | 0 | 0.93523811   |
| 0 | 0.083947104 | 0 | -0.009311872 | 0 | -0.036164867 | 0 | 0.081447257  | 0 | 0.93577438   |
| 0 | 0.096559878 | 0 | -0.02125474  | 0 | 0            | 0 | 0.07957863   | 0 | 0.916335     |

|   |             |   |              |   |              |             |             |            |            |
|---|-------------|---|--------------|---|--------------|-------------|-------------|------------|------------|
| 0 | 0.10619126  | 0 | 0            | 0 | 0            | 0.076740141 | 0           | 0.91345375 |            |
| 0 | 0.087948651 | 0 | -0.042542562 | 0 | 0            | 0           | 0           | 0.99451525 |            |
| 0 | 0.083745067 | 0 | -0.03625076  | 0 | -0.014889672 | 0           | 0           | 1.0062358  |            |
| 0 | 0.08807831  | 0 | -0.042964087 | 0 | 0            | 0           | 0           | 0.99990325 |            |
| 0 | 0           | 0 | -0.042579961 | 0 | -0.071238015 | 0           | 0.082348381 | 0          | 1.0104796  |
| 0 | 0.084835242 | 0 | 0            | 0 | -0.047051038 | 0           | 0           | 0          | 1.0088178  |
| 0 | 0.084915591 | 0 | 0            | 0 | -0.047568028 | 0           | 0           | 0          | 1.0145443  |
| 0 | 0.050539729 | 0 | 0            | 0 | -0.11516156  | 0           | 0.040828138 | 0          | 1.0190527  |
| 0 | 0.049778439 | 0 | 0            | 0 | -0.11671615  | 0           | 0.03968236  | 0          | 1.0208976  |
| 0 | 0.087235429 | 0 | -0.004396915 | 0 | -0.039150994 | 0           | 0           | 0          | 1.0058142  |
| 0 | 0.050723539 | 0 | 0.000446306  | 0 | -0.11549848  | 0           | 0.040444518 | 0          | 1.0191791  |
| 0 | 0.087099755 | 0 | 0            | 0 | -0.043537924 | 0           | 0           | 0          | 1.0070239  |
| 0 | 0           | 0 | 0            | 0 | -0.11008935  | 0           | 0.07981285  | 0          | 1.0206723  |
| 0 | 0.048335074 | 0 | 0            | 0 | -0.11864392  | 0           | 0.037549496 | 0          | 1.0211023  |
| 0 | 0.048935601 | 0 | 0.00026847   | 0 | -0.11786759  | 0           | 0.038092326 | 0          | 1.0200886  |
| 0 | 0.04821342  | 0 | -0.001188481 | 0 | -0.11798415  | 0           | 0.036839437 | 0          | 1.0213666  |
| 0 | 0           | 0 | 0            | 0 | -0.11060391  | 0           | 0.080942387 | 0          | 1.0232778  |
| 0 | 0.087360032 | 0 | -0.003792374 | 0 | -0.040234532 | 0           | 0           | 0          | 1.012576   |
| 0 | 0.10888133  | 0 | 0            | 0 | 0            | 0           | 0           | 0          | 0.98339893 |
| 0 | 0.10103075  | 0 | -0.017238614 | 0 | 0            | 0           | 0           | 0          | 0.98809714 |
| 0 | 0.083471598 | 0 | -0.041546437 | 0 | 0            | 0           | 0           | 0          | 0.99849003 |
| 0 | 0           | 0 | -0.04390532  | 0 | -0.064399187 | 0           | 0.081925276 | 0          | 1.0105842  |
| 0 | 0           | 0 | -0.082858834 | 0 | 0            | 0           | 0.080660522 | 0          | 0.99763048 |
| 0 | 0.080756893 | 0 | -0.037749934 | 0 | -0.00944147  | 0           | 0           | 0          | 1.0086597  |
| 0 | 0           | 0 | -0.005561632 | 0 | -0.10244876  | 0           | 0.080858093 | 0          | 1.0189416  |
| 0 | 0           | 0 | 0            | 0 | -0.10800208  | 0           | 0.080735107 | 0          | 1.0206153  |
| 0 | 0           | 0 | -0.083278985 | 0 | 0            | 0           | 0.081771711 | 0          | 1.0000567  |
| 0 | 0           | 0 | -0.005371594 | 0 | -0.10324314  | 0           | 0.082305362 | 0          | 1.0223129  |
| 0 | 0.05730688  | 0 | -0.009182025 | 0 | -0.09082401  | 0           | 0           | 0          | 1.0443988  |
| 0 | 0.057637002 | 0 | -0.009317555 | 0 | -0.090311122 | 0           | 0           | 0          | 1.0445224  |
| 0 | 0.059671397 | 0 | 0            | 0 | -0.09520347  | 0           | 0           | 0          | 1.0442238  |
| 0 | 0.081867316 | 0 | 0            | 0 | -0.042895208 | 0           | 0           | 0          | 1.0109177  |
| 0 | 0.062883971 | 0 | -0.000308161 | 0 | -0.089124257 | 0           | 0           | 0          | 1.0402737  |
| 0 | 0.09712016  | 0 | -0.045395236 | 0 | 0            | 0           | 0.092659826 | 0          | 0          |
| 0 | 0.0956607   | 0 | -0.043318733 | 0 | -0.005441816 | 0           | 0.093939165 | 0          | 0          |
| 0 | 0           | 0 | 0            | 0 | -0.10433504  | 0           | 0.079127893 | 0          | 1.0206314  |
| 0 | 0.097184624 | 0 | -0.045806463 | 0 | 0            | 0           | 0.093874003 | 0          | 0          |
| 0 | 0.084174796 | 0 | -0.006708763 | 0 | -0.033226224 | 0           | 0           | 0          | 1.007464   |
| 0 | 0           | 0 | -0.012414869 | 0 | -0.13091827  | 0           | 0.048060106 | 0          | 1.0558909  |
| 0 | 0           | 0 | -0.013130716 | 0 | -0.12970478  | 0           | 0.049127618 | 0          | 1.0564919  |
| 0 | 0           | 0 | 0            | 0 | -0.13877121  | 0           | 0.051980088 | 0          | 1.0564176  |
| 0 | 0.046312891 | 0 | -0.002014032 | 0 | -0.11086563  | 0           | 0.038942886 | 0          | 1.0239838  |
| 0 | 0.046163131 | 0 | 0            | 0 | -0.11297771  | 0           | 0.038794607 | 0          | 1.0247462  |
| 0 | 0           | 0 | -0.080497283 | 0 | 0            | 0           | 0.080178178 | 0          | 0.99817653 |
| 0 | 0           | 0 | -0.001346682 | 0 | -0.13305394  | 0           | 0.055660829 | 0          | 1.0518755  |
| 0 | 0.044596778 | 0 | -0.002701083 | 0 | -0.11295452  | 0           | 0.036310182 | 0          | 1.0252993  |
| 0 | 0           | 0 | -0.007901625 | 0 | -0.094919461 | 0           | 0.08032238  | 0          | 1.0182241  |

|   |             |   |              |   |              |   |              |   |              |
|---|-------------|---|--------------|---|--------------|---|--------------|---|--------------|
| 0 | 0.097092699 | 0 | 0            | 0 | -0.043887778 | 0 | 0.091224956  | 0 | 0            |
| 0 | 0.097124376 | 0 | 0            | 0 | -0.04439838  | 0 | 0.092508642  | 0 | 0            |
| 0 | 0.099391317 | 0 | -0.009803247 | 0 | -0.03101009  | 0 | 0.092276739  | 0 | 0            |
| 0 | 0.099055255 | 0 | 0            | 0 | -0.04081633  | 0 | 0.091819978  | 0 | 0            |
| 0 | 0.099438269 | 0 | -0.009445994 | 0 | -0.031914149 | 0 | 0.093842297  | 0 | 0            |
| 0 | 0.053696214 | 0 | -0.010233692 | 0 | -0.086703705 | 0 | 0            | 0 | 1.0477667    |
| 0 | 0           | 0 | -0.038750082 | 0 | -0.069450485 | 0 | 0            | 0 | 1.085423     |
| 0 | 0.11011139  | 0 | -0.020036458 | 0 | 0            | 0 | 0.091701026  | 0 | 0            |
| 0 | 0.084424685 | 0 | -0.041159256 | 0 | -0.015445318 | 0 | 0.094872552  | 0 | -0.092403    |
| 0 | 0.088846412 | 0 | -0.047845101 | 0 | 0            | 0 | 0.093769236  | 0 | -0.10034707  |
| 0 | 0.088849459 | 0 | -0.048191761 | 0 | 0            | 0 | 0.094694597  | 0 | -0.098215784 |
| 0 | 0           | 0 | -0.039106018 | 0 | -0.06975178  | 0 | 0            | 0 | 1.0911038    |
| 0 | 0.092433615 | 0 | -0.04435981  | 0 | 0            | 0 | 0.091957772  | 0 | 0            |
| 0 | 0.11923085  | 0 | 0            | 0 | 0            | 0 | 0.088924295  | 0 | 0            |
| 0 | 0           | 0 | -0.013554719 | 0 | -0.12437921  | 0 | 0.047515803  | 0 | 1.0576074    |
| 0 | 0.092536645 | 0 | -0.044869613 | 0 | 0.000143958  | 0 | 0.093351976  | 0 | 0            |
| 0 | 0           | 0 | -0.024346005 | 0 | -0.10031413  | 0 | 0            | 0 | 1.0946584    |
| 0 | 0           | 0 | 0            | 0 | -0.10529948  | 0 | 0            | 0 | 1.0955192    |
| 0 | 0.085680416 | 0 | 0            | 0 | -0.052189283 | 0 | 0.092398073  | 0 | -0.08767026  |
| 0 | 0.085644804 | 0 | 0            | 0 | -0.05265531  | 0 | 0.093430892  | 0 | -0.085276691 |
| 0 | 0.093984352 | 0 | 0            | 0 | -0.039581034 | 0 | 0.090366403  | 0 | 0            |
| 0 | 0.088060222 | 0 | -0.008104017 | 0 | -0.040857454 | 0 | 0.093432887  | 0 | -0.091706552 |
| 0 | 0.087712854 | 0 | 0            | 0 | -0.049023526 | 0 | 0.093054297  | 0 | -0.089758009 |
| 0 | 0           | 0 | -0.039995363 | 0 | -0.062798946 | 0 | 0            | 0 | 1.0843939    |
| 0 | 0.088023185 | 0 | -0.007807738 | 0 | -0.041676874 | 0 | 0.094734679  | 0 | -0.088713507 |
| 0 | 0.096173437 | 0 | -0.012217437 | 0 | -0.024894294 | 0 | 0.091550726  | 0 | 0            |
| 0 | 0           | 0 | -0.078408454 | 0 | 0            | 0 | 0            | 0 | 1.0744314    |
| 0 | 0           | 0 | -0.002752679 | 0 | -0.10026526  | 0 | 0            | 0 | 1.0955254    |
| 0 | 0.10236534  | 0 | -0.021551902 | 0 | 0            | 0 | 0.092874188  | 0 | -0.10877877  |
| 0 | 0.084192971 | 0 | -0.046845759 | 0 | 0            | 0 | 0.093027755  | 0 | -0.095503026 |
| 0 | 0.081270409 | 0 | -0.042636098 | 0 | -0.010108141 | 0 | 0.094255027  | 0 | -0.089060495 |
| 0 | 0           | 0 | -0.049333251 | 0 | 0            | 0 | 0.079188816  | 0 | 1.0084227    |
| 0 | 0.11222863  | 0 | 0            | 0 | 0            | 0 | 0.090012757  | 0 | -0.11437601  |
| 0 | 0.082542081 | 0 | 0            | 0 | -0.047980972 | 0 | 0.091524164  | 0 | -0.084549261 |
| 0 | 0.084826344 | 0 | -0.010489951 | 0 | -0.034850175 | 0 | 0.092695344  | 0 | -0.088970847 |
| 0 | 0.025502406 | 0 | -0.028945106 | 0 | -0.068722529 | 0 | 0.092665057  | 0 | 0            |
| 0 | 0.025979279 | 0 | -0.028969817 | 0 | -0.068446144 | 0 | 0.092745415  | 0 | 0            |
| 0 | 0.097675851 | 0 | -0.040152753 | 0 | 0            | 0 | 0            | 0 | 0            |
| 0 | 0.096995289 | 0 | -0.03921933  | 0 | -0.002171161 | 0 | 0            | 0 | 0            |
| 0 | 0.097197808 | 0 | -0.03965025  | 0 | -0.002309444 | 0 | 0            | 0 | 0            |
| 0 | 0.029887314 | 0 | 0            | 0 | -0.092376193 | 0 | 0.091882906  | 0 | 0            |
| 0 | 0.075371957 | 0 | -0.06408653  | 0 | 0            | 0 | -0.012618542 | 0 | 1.0412232    |
| 0 | 0           | 0 | -0.04676752  | 0 | -0.067422328 | 0 | 0.094103555  | 0 | 0            |
| 0 | 0.078879053 | 0 | -0.057172314 | 0 | 0            | 0 | -0.009730496 | 0 | 1.0361303    |
| 0 | 0           | 0 | -0.047083908 | 0 | -0.067773654 | 0 | 0.095495499  | 0 | 0            |
| 0 | 0.073897558 | 0 | -0.067103931 | 0 | 0            | 0 | 0            | 0 | 1.0329963    |
| 0 | 0           | 0 | -0.043781355 | 0 | -0.070626401 | 0 | 0.094124598  | 0 | -0.014054299 |

|   |             |   |              |   |              |   |              |   |              |
|---|-------------|---|--------------|---|--------------|---|--------------|---|--------------|
| 0 | 0           | 0 | -0.044050812 | 0 | -0.070876946 | 0 | 0.09520756   | 0 | -0.01193676  |
| 0 | 0.098397516 | 0 | 0            | 0 | -0.037404144 | 0 | 0            | 0 | 0            |
| 0 | 0           | 0 | -0.03878904  | 0 | -0.076038699 | 0 | 0.093822325  | 0 | 0            |
| 0 | 0.030810012 | 0 | 0.000723951  | 0 | -0.090427229 | 0 | 0.092548167  | 0 | 0            |
| 0 | 0.073739301 | 0 | -0.06458726  | 0 | 0            | 0 | -0.023781133 | 0 | 1.0431115    |
| 0 | 0.10070796  | 0 | -0.006687779 | 0 | -0.027398423 | 0 | 0            | 0 | 0            |
| 0 | 0.030499202 | 0 | -0.064325886 | 0 | 0            | 0 | 0.09168925   | 0 | 0            |
| 0 | 0.024615007 | 0 | -0.03078522  | 0 | -0.061767196 | 0 | 0.092196164  | 0 | 0            |
| 0 | 0.05741078  | 0 | -0.00111774  | 0 | -0.11761854  | 0 | 0.04609583   | 0 | 0            |
| 0 | 0.05760368  | 0 | 0            | 0 | -0.11832893  | 0 | 0.046235079  | 0 | 0            |
| 0 | 0.057574048 | 0 | -0.000949711 | 0 | -0.1177371   | 0 | 0.045687223  | 0 | 0            |
| 0 | 0           | 0 | 0            | 0 | -0.11063859  | 0 | 0.092617914  | 0 | 0            |
| 0 | 0.056315    | 0 | 0.000250078  | 0 | -0.1204541   | 0 | 0.043660863  | 0 | 0            |
| 0 | 0           | 0 | 0            | 0 | 0            | 0 | 0.07221199   | 0 | 1.0250855    |
| 0 | 0.084712136 | 0 | -0.036812429 | 0 | -0.013255046 | 0 | 0            | 0 | -0.092900066 |
| 0 | 0           | 0 | 0            | 0 | -0.11106686  | 0 | 0.092627444  | 0 | -0.005458454 |
| 0 | 0.094069409 | 0 | -0.040670441 | 0 | 0.003319494  | 0 | 0            | 0 | 0            |
| 0 | 0.088576253 | 0 | -0.042782083 | 0 | 0            | 0 | 0            | 0 | -0.09796209  |
| 0 | 0.071081384 | 0 | -0.063129567 | 0 | 0            | 0 | -0.011606105 | 0 | 1.0439714    |
| 0 | 0           | 0 | -0.085224637 | 0 | 0            | 0 | 0.093366365  | 0 | 0            |
| 0 | 0           | 0 | -0.047955898 | 0 | -0.060715356 | 0 | 0.093478575  | 0 | 0            |
| 0 | 0.08480244  | 0 | -0.03717373  | 0 | -0.013457729 | 0 | 0            | 0 | -0.088950246 |
| 0 | 0           | 0 | -0.045034761 | 0 | -0.063842601 | 0 | 0.093501278  | 0 | -0.014219394 |
| 0 | 0           | 0 | -0.008256138 | 0 | -0.10042368  | 0 | 0.093820627  | 0 | 0            |
| 0 | 0           | 0 | -0.084105496 | 0 | 0            | 0 | 0.093453861  | 0 | -0.023224733 |
| 0 | 0.047477766 | 0 | 0            | 0 | -0.12274206  | 0 | 0.049742367  | 0 | -0.041888598 |
| 0 | 0.047920273 | 0 | 0.000150119  | 0 | -0.12211381  | 0 | 0.050094457  | 0 | -0.042369657 |
| 0 | 0.047417504 | 0 | -0.001115885 | 0 | -0.12204988  | 0 | 0.049165101  | 0 | -0.041926041 |
| 0 | 0           | 0 | -0.006526041 | 0 | -0.10254216  | 0 | 0.09375349   | 0 | -0.006928203 |
| 0 | 0.085906388 | 0 | 0            | 0 | -0.046415696 | 0 | 0            | 0 | -0.086802884 |
| 0 | 0.04603673  | 0 | 0.000234228  | 0 | -0.12507831  | 0 | 0.046896532  | 0 | -0.043062885 |
| 0 | 0.088279374 | 0 | -0.004780895 | 0 | -0.038164815 | 0 | 0            | 0 | -0.090168954 |
| 0 | 0.067477497 | 0 | -0.008847292 | 0 | -0.088693919 | 0 | 0            | 0 | 0            |
| 0 | 0.022122661 | 0 | -0.001979178 | 0 | -0.13172175  | 0 | 0.056899404  | 0 | 0            |
| 0 | 0.081779211 | 0 | -0.038242298 | 0 | -0.007874879 | 0 | 0            | 0 | -0.090260563 |
| 0 | 0.053701205 | 0 | -0.002182111 | 0 | -0.11319039  | 0 | 0.04464609   | 0 | 0            |
| 0 | 0           | 0 | -0.013432266 | 0 | -0.13477347  | 0 | 0.057920017  | 0 | 0            |
| 0 | 0           | 0 | -0.011447934 | 0 | -0.13583031  | 0 | 0.058967779  | 0 | -0.000438178 |
| 0 | 0.10614951  | 0 | 0            | 0 | 0            | 0 | -0.025275734 | 0 | 1.0396433    |
| 0 | 0.057812675 | 0 | -0.009623105 | 0 | -0.0908858   | 0 | 0            | 0 | -0.055471651 |
| 0 | 0.043560997 | 0 | -0.00234455  | 0 | -0.11755631  | 0 | 0.048130007  | 0 | -0.038308521 |
| 0 | 0           | 0 | -0.094160227 | 0 | 0            | 0 | -0.006630423 | 0 | 1.1027593    |
| 0 | 0.027212378 | 0 | -0.025309816 | 0 | -0.065300833 | 0 | 0            | 0 | 0            |
| 0 | 0           | 0 | -0.042900336 | 0 | -0.065325348 | 0 | 0            | 0 | 0            |
| 0 | 0           | 0 | -0.039694956 | 0 | -0.068745636 | 0 | 0            | 0 | -0.012172942 |
| 0 | 0.084158776 | 0 | -0.063995488 | 0 | 0            | 0 | -0.006771596 | 0 | 0            |
| 0 | 0.074780052 | 0 | -0.066584474 | 0 | 0            | 0 | -0.004992412 | 0 | -0.073816163 |

|   |             |   |              |   |              |   |              |   |              |
|---|-------------|---|--------------|---|--------------|---|--------------|---|--------------|
| 0 | 0.076598061 | 0 | -0.052533839 | 0 | 0.08203877   | 0 | 0.053256733  | 0 | 0.92871288   |
| 0 | 0.080015535 | 0 | -0.021637682 | 0 | 0.057974517  | 0 | 0.051110966  | 0 | 0.92930901   |
| 0 | 0.078143978 | 0 | 0            | 0 | 0.036311789  | 0 | 0.049074478  | 0 | 0.93760395   |
| 0 | 0.077058094 | 0 | -0.049150109 | 0 | 0.079039863  | 0 | 0            | 0 | 0.97371372   |
| 0 | 0.049596941 | 0 | -0.011569099 | 0 | 0            | 0 | 0.049342764  | 0 | 0.96164824   |
| 0 | 0           | 0 | -0.054429929 | 0 | 0.030256154  | 0 | 0.052096816  | 0 | 1.0013842    |
| 0 | 0.088696711 | 0 | -0.055491143 | 0 | 0.092919515  | 0 | 0.062938416  | 0 | 0            |
| 0 | 0.077516673 | 0 | -0.053295617 | 0 | 0.082474961  | 0 | 0.064107345  | 0 | -0.085505909 |
| 0 | 0.016892085 | 0 | 0.008222449  | 0 | -0.065140059 | 0 | -0.026519856 | 0 | 1.0898802    |
| 0 | 0.083564388 | 0 | -0.039724085 | 0 | -0.016539643 | 0 | 0.08221902   | 0 | 0.92603304   |
| 0 | 0.088270342 | 0 | -0.046909525 | 0 | 0            | 0 | 0.081162059  | 0 | 0.91702425   |
| 0 | 0.088272852 | 0 | -0.047252023 | 0 | 0            | 0 | 0.082104659  | 0 | 0.91929878   |
| 0 | 0.084773659 | 0 | 0            | 0 | -0.051931386 | 0 | 0.079799826  | 0 | 0.93413854   |
| 0 | 0.084727625 | 0 | 0            | 0 | -0.052394505 | 0 | 0.080798744  | 0 | 0.93674269   |
| 0 | 0.087131771 | 0 | -0.007293421 | 0 | -0.041400884 | 0 | 0.080799279  | 0 | 0.9295054    |
| 0 | 0.086798276 | 0 | 0            | 0 | -0.048772248 | 0 | 0.080460021  | 0 | 0.93201288   |
| 0 | 0.087085055 | 0 | -0.007010311 | 0 | -0.042204414 | 0 | 0.08206658   | 0 | 0.93280255   |
| 0 | 0.10162203  | 0 | -0.020928143 | 0 | 0            | 0 | 0.08026661   | 0 | 0.91142138   |
| 0 | 0.083613594 | 0 | -0.045914452 | 0 | 0            | 0 | 0.08042486   | 0 | 0.92193411   |
| 0 | 0.080400934 | 0 | -0.041246082 | 0 | -0.011098882 | 0 | 0.081625501  | 0 | 0.92930484   |
| 0 | 0.11118665  | 0 | 0            | 0 | 0            | 0 | 0.07741505   | 0 | 0.90852849   |
| 0 | 0.081628749 | 0 | 0            | 0 | -0.047738724 | 0 | 0.078928703  | 0 | 0.93728268   |
| 0 | 0.083887737 | 0 | -0.009684865 | 0 | -0.035394301 | 0 | 0.080068345  | 0 | 0.9320574    |
| 0 | 0.083747296 | 0 | -0.035908226 | 0 | -0.0146257   | 0 | 0            | 0 | 1.0006601    |
| 0 | 0.087986124 | 0 | -0.042514301 | 0 | 0            | 0 | 0            | 0 | 0.99445253   |
| 0 | 0.083806547 | 0 | -0.036240593 | 0 | -0.014833855 | 0 | 0            | 0 | 1.0061235    |
| 0 | 0           | 0 | -0.042361468 | 0 | -0.071048757 | 0 | 0.081419974  | 0 | 1.008173     |
| 0 | 0           | 0 | -0.042620507 | 0 | -0.071306397 | 0 | 0.082516022  | 0 | 1.0105218    |
| 0 | 0.084883412 | 0 | 0            | 0 | -0.047000874 | 0 | 0            | 0 | 1.0087379    |
| 0 | 0.049636545 | 0 | 0            | 0 | -0.11672637  | 0 | 0.040088948  | 0 | 1.0207991    |
| 0 | 0.050549361 | 0 | 0.000248935  | 0 | -0.11537788  | 0 | 0.04083222   | 0 | 1.0190936    |
| 0 | 0.049287706 | 0 | -0.002644043 | 0 | -0.1150947   | 0 | 0.03931455   | 0 | 1.0211979    |
| 0 | 0.087225687 | 0 | -0.004401294 | 0 | -0.039157163 | 0 | 0            | 0 | 1.005829     |
| 0 | 0           | 0 | 0            | 0 | -0.11019012  | 0 | 0.079976943  | 0 | 1.0206596    |
| 0 | 0.048042679 | 0 | -0.001459175 | 0 | -0.11777944  | 0 | 0.037309888  | 0 | 1.0212847    |
| 0 | 0.080774206 | 0 | -0.037349137 | 0 | -0.00924717  | 0 | 0            | 0 | 1.0024169    |
| 0 | 0           | 0 | -0.043611762 | 0 | -0.064265532 | 0 | 0.080835854  | 0 | 1.0078004    |
| 0 | 0           | 0 | -0.005723263 | 0 | -0.10242957  | 0 | 0.081062089  | 0 | 1.0189776    |
| 0 | 0           | 0 | -0.082930692 | 0 | 0            | 0 | 0.080807524  | 0 | 0.99762012   |
| 0 | 0.05757436  | 0 | -0.009489063 | 0 | -0.090090608 | 0 | 0            | 0 | 1.0446158    |
| 0 | 0.095631411 | 0 | -0.043008878 | 0 | -0.005257819 | 0 | 0.092737021  | 0 | 0            |
| 0 | 0.09709005  | 0 | -0.045419518 | 0 | 0            | 0 | 0.092684665  | 0 | 0            |
| 0 | 0.095633846 | 0 | -0.043328436 | 0 | -0.005463592 | 0 | 0.093953086  | 0 | 0            |
| 0 | 0           | 0 | -0.01334969  | 0 | -0.12948708  | 0 | 0.04954855   | 0 | 1.0562417    |
| 0 | 0.045446346 | 0 | -0.003862977 | 0 | -0.1106158   | 0 | 0.038265073  | 0 | 1.0252119    |
| 0 | 0.097063402 | 0 | 0            | 0 | -0.043919558 | 0 | 0.091243197  | 0 | 0            |
| 0 | 0.099289979 | 0 | -0.009855572 | 0 | -0.031074047 | 0 | 0.092334596  | 0 | 0            |



|   |             |   |              |   |              |   |              |              |
|---|-------------|---|--------------|---|--------------|---|--------------|--------------|
| 0 | 0           | 0 | -0.038768457 | 0 | -0.069489177 | 0 | 0            | 1.0855186    |
| 0 | 0.08442987  | 0 | -0.040873736 | 0 | -0.015383838 | 0 | 0.093922304  | -0.094520514 |
| 0 | 0.084369875 | 0 | -0.041126232 | 0 | -0.015607046 | 0 | 0.094891321  | -0.092341494 |
| 0 | 0.088809494 | 0 | -0.047873477 | 0 | 0            | 0 | 0.093800577  | -0.10032475  |
| 0 | 0.092513745 | 0 | -0.044486362 | 0 | 0.000278635  | 0 | 0.091953665  | 0            |
| 0 | 0.085629017 | 0 | 0            | 0 | -0.052233646 | 0 | 0.092414775  | -0.087615463 |
| 0 | 0.087940973 | 0 | -0.008160429 | 0 | -0.040934665 | 0 | 0.093503224  | -0.09161536  |
| 0 | 0.08128885  | 0 | -0.042328778 | 0 | -0.009961156 | 0 | 0.093126153  | -0.091686702 |
| 0 | 0.025891167 | 0 | -0.02909288  | 0 | -0.068422172 | 0 | 0.092942349  | 0            |
| 0 | 0.097078179 | 0 | -0.039206162 | 0 | -0.002094038 | 0 | 0            | 0            |
| 0 | 0.075104347 | 0 | -0.064279507 | 0 | 0            | 0 | -0.012066461 | 1.0411034    |
| 0 | 0           | 0 | -0.046694006 | 0 | -0.067696722 | 0 | 0.094295597  | 0            |
| 0 | 0           | 0 | -0.043810112 | 0 | -0.070706165 | 0 | 0.094270573  | -0.014085586 |
| 0 | 0.057385836 | 0 | -0.001172288 | 0 | -0.11761121  | 0 | 0.046075017  | 0            |
| 0 | 0.084773702 | 0 | -0.036801873 | 0 | -0.0132009   | 0 | 0            | -0.092949459 |
| 0 | 0.047224482 | 0 | -0.001341793 | 0 | -0.12192885  | 0 | 0.049559786  | -0.041857833 |
| 0 | 0.076648756 | 0 | -0.051969793 | 0 | 0.081830211  | 0 | 0.051521512  | 0.92387779   |
| 0 | 0.083569036 | 0 | -0.039490644 | 0 | -0.016372168 | 0 | 0.081318358  | 0.92375145   |
| 0 | 0.08350188  | 0 | -0.039733068 | 0 | -0.016593795 | 0 | 0.08225969   | 0.92610295   |
| 0 | 0.088217257 | 0 | -0.046970359 | 0 | 0            | 0 | 0.08122286   | 0.91722107   |
| 0 | 0.084712883 | 0 | 0            | 0 | -0.051992114 | 0 | 0.079841913  | 0.93417006   |
| 0 | 0.087004033 | 0 | -0.007362764 | 0 | -0.04147731  | 0 | 0.080871443  | 0.92964762   |
| 0 | 0.080418396 | 0 | -0.040947499 | 0 | -0.010955253 | 0 | 0.080528469  | 0.92647765   |
| 0 | 0.08380272  | 0 | -0.035954011 | 0 | -0.0145536   | 0 | 0            | 1.0006501    |
| 0 | 0           | 0 | -0.042383505 | 0 | -0.071134793 | 0 | 0.081608072  | 1.0082056    |
| 0 | 0.049099373 | 0 | -0.002879386 | 0 | -0.11496202  | 0 | 0.039691674  | 1.0211337    |
| 0 | 0.09556809  | 0 | -0.043020836 | 0 | -0.005304923 | 0 | 0.09274072   | 0            |
| 0 | 0.084361834 | 0 | -0.040885841 | 0 | -0.015445529 | 0 | 0.093969555  | -0.094464438 |
| 0 | 0.083493963 | 0 | -0.039505037 | 0 | -0.016440585 | 0 | 0.081364191  | 0.92383133   |

| SE | bsnp_rs6469674 | SE | bsnp_rs13269857 | SE | bsnp_rs3020106 | SE | bsnp_rs3020119 | SE |
|----|----------------|----|-----------------|----|----------------|----|----------------|----|
| 0  | 0              | 0  | 0               | 0  | 0              | 0  | 0              | 0  |
| 0  | 0              | 0  | 0               | 0  | 0              | 0  | 0              | 0  |
| 0  | 0              | 0  | 0               | 0  | 0              | 0  | 0              | 0  |
| 0  | 0              | 0  | -0.14666113     | 0  | 0              | 0  | 0              | 0  |
| 0  | 0              | 0  | 0               | 0  | -0.14794332    | 0  | 0              | 0  |
| 0  | 0              | 0  | 0               | 0  | 0              | 0  | 0              | 0  |
| 0  | 0              | 0  | 0               | 0  | 0              | 0  | 0              | 0  |
| 0  | 0              | 0  | 0               | 0  | 0              | 0  | 0              | 0  |
| 0  | 0              | 0  | 0               | 0  | 0              | 0  | 0.082414687    | 0  |
| 0  | 0              | 0  | 0               | 0  | -0.12869846    | 0  | 0              | 0  |
| 0  | 0              | 0  | -0.12470181     | 0  | 0              | 0  | 0              | 0  |
| 0  | 0              | 0  | 0               | 0  | -0.093215419   | 0  | 0              | 0  |
| 0  | 0              | 0  | -0.090398937    | 0  | 0              | 0  | 0              | 0  |
| 0  | 0              | 0  | 0               | 0  | -0.13024136    | 0  | 0              | 0  |
| 0  | 0              | 0  | -0.12753785     | 0  | 0              | 0  | 0              | 0  |
| 0  | 0              | 0  | 0               | 0  | 0              | 0  | 0              | 0  |
| 0  | 0              | 0  | 0               | 0  | 0              | 0  | 0              | 0  |
| 0  | 0              | 0  | 0               | 0  | -0.11239705    | 0  | 0              | 0  |
| 0  | 0              | 0  | -0.11089541     | 0  | 0              | 0  | 0              | 0  |
| 0  | 0              | 0  | 0               | 0  | 0              | 0  | 0              | 0  |
| 0  | 0              | 0  | 0               | 0  | 0              | 0  | -0.018816843   | 0  |
| 0  | 0              | 0  | 0               | 0  | 0              | 0  | 0              | 0  |
| 0  | 0              | 0  | 0               | 0  | 0              | 0  | 0              | 0  |
| 0  | 0              | 0  | 0               | 0  | 0              | 0  | 0              | 0  |
| 0  | 0              | 0  | 0               | 0  | -0.10797594    | 0  | 0              | 0  |
| 0  | -0.002678457   | 0  | 0               | 0  | 0              | 0  | 0              | 0  |
| 0  | 0              | 0  | -0.10624524     | 0  | 0              | 0  | 0              | 0  |
| 0  | 0              | 0  | 0               | 0  | 0              | 0  | 0              | 0  |
| 0  | 0              | 0  | 0               | 0  | 0              | 0  | 0              | 0  |
| 0  | 0.013604315    | 0  | 0               | 0  | 0              | 0  | 0              | 0  |
| 0  | 0              | 0  | 0               | 0  | -0.12376497    | 0  | 0.057001226    | 0  |
| 0  | 0              | 0  | -0.12184371     | 0  | 0              | 0  | 0.055289062    | 0  |
| 0  | 0              | 0  | 0               | 0  | 0              | 0  | 0              | 0  |
| 0  | 0              | 0  | 0               | 0  | 0              | 0  | 0              | 0  |
| 0  | 0              | 0  | -0.15782846     | 0  | 0              | 0  | 0              | 0  |
| 0  | 0              | 0  | 0               | 0  | -0.16003276    | 0  | 0              | 0  |
| 0  | 0              | 0  | 0               | 0  | 0              | 0  | 0.019709677    | 0  |
| 0  | 0              | 0  | 0               | 0  | 0              | 0  | 0              | 0  |
| 0  | 0              | 0  | 0               | 0  | 0              | 0  | 0              | 0  |
| 0  | 0.007407883    | 0  | 0               | 0  | 0              | 0  | 0              | 0  |
| 0  | 0              | 0  | 0               | 0  | 0              | 0  | 0              | 0  |
| 0  | 0              | 0  | 0               | 0  | 0              | 0  | 0              | 0  |
| 0  | 0              | 0  | -0.083991912    | 0  | -0.065082552   | 0  | 0              | 0  |
| 0  | -0.004478711   | 0  | -0.1469965      | 0  | 0              | 0  | 0              | 0  |
| 0  | 0              | 0  | -0.14640071     | 0  | 0              | 0  | 0              | 0  |

|   |              |   |              |   |              |   |              |   |
|---|--------------|---|--------------|---|--------------|---|--------------|---|
| 0 | -0.004648273 | 0 | 0            | 0 | -0.14830015  | 0 | 0            | 0 |
| 0 | 0            | 0 | 0            | 0 | -0.14768904  | 0 | 0            | 0 |
| 0 | 0            | 0 | 0            | 0 | 0            | 0 | 0.042499054  | 0 |
| 0 | 0            | 0 | 0            | 0 | 0            | 0 | 0            | 0 |
| 0 | 0            | 0 | 0            | 0 | 0            | 0 | 0            | 0 |
| 0 | 0            | 0 | 0            | 0 | 0            | 0 | 0            | 0 |
| 0 | 0            | 0 | 0            | 0 | 0            | 0 | 0.026291557  | 0 |
| 0 | 0            | 0 | 0            | 0 | 0            | 0 | 0.033685158  | 0 |
| 0 | 0            | 0 | 0            | 0 | 0            | 0 | 0            | 0 |
| 0 | 0            | 0 | 0            | 0 | 0            | 0 | 0            | 0 |
| 0 | 0.003362263  | 0 | 0            | 0 | 0            | 0 | 0            | 0 |
| 0 | 0            | 0 | 0            | 0 | 0            | 0 | 0            | 0 |
| 0 | -0.009112157 | 0 | 0            | 0 | 0            | 0 | 0            | 0 |
| 0 | 0            | 0 | 0            | 0 | 0            | 0 | 0            | 0 |
| 0 | 0            | 0 | 0            | 0 | 0            | 0 | 0            | 0 |
| 0 | 0.003963332  | 0 | 0            | 0 | 0            | 0 | 0            | 0 |
| 0 | 0            | 0 | 0            | 0 | 0            | 0 | 0.089314823  | 0 |
| 0 | 0            | 0 | 0            | 0 | 0            | 0 | 0.085250146  | 0 |
| 0 | 0.032816456  | 0 | 0            | 0 | 0            | 0 | 0.084679679  | 0 |
| 0 | 0            | 0 | 0            | 0 | -0.15798006  | 0 | 0            | 0 |
| 0 | 0            | 0 | -0.15287181  | 0 | 0            | 0 | 0            | 0 |
| 0 | 0            | 0 | 0            | 0 | -0.13709285  | 0 | 0            | 0 |
| 0 | 0            | 0 | 0            | 0 | -0.13899289  | 0 | 0            | 0 |
| 0 | 0            | 0 | 0            | 0 | -0.13266839  | 0 | -0.013478319 | 0 |
| 0 | 0            | 0 | -0.13243941  | 0 | 0            | 0 | 0            | 0 |
| 0 | -0.007856658 | 0 | 0            | 0 | -0.12928721  | 0 | 0            | 0 |
| 0 | 0            | 0 | 0            | 0 | -0.13339701  | 0 | 0            | 0 |
| 0 | 0            | 0 | 0            | 0 | -0.12856629  | 0 | 0            | 0 |
| 0 | 0            | 0 | -0.006116926 | 0 | -0.12269001  | 0 | 0            | 0 |
| 0 | 0            | 0 | 0            | 0 | -0.12869903  | 0 | 0            | 0 |
| 0 | 0            | 0 | -0.13355278  | 0 | 0            | 0 | 0            | 0 |
| 0 | 0            | 0 | -0.1287528   | 0 | 0            | 0 | -0.013542493 | 0 |
| 0 | -0.00723369  | 0 | -0.12522983  | 0 | 0            | 0 | 0            | 0 |
| 0 | 0            | 0 | -0.12770768  | 0 | 0            | 0 | 0            | 0 |
| 0 | 0            | 0 | -0.12452945  | 0 | 0            | 0 | 0            | 0 |
| 0 | 0            | 0 | -0.12465789  | 0 | 0            | 0 | 0            | 0 |
| 0 | 0            | 0 | 0            | 0 | -0.10546123  | 0 | 0            | 0 |
| 0 | 0            | 0 | 0            | 0 | -0.10091758  | 0 | 0            | 0 |
| 0 | 0            | 0 | -0.10162573  | 0 | 0            | 0 | 0            | 0 |
| 0 | 0            | 0 | -0.098241507 | 0 | 0            | 0 | 0            | 0 |
| 0 | 0            | 0 | 0            | 0 | -0.10548593  | 0 | 0            | 0 |
| 0 | 0            | 0 | -0.10250936  | 0 | 0            | 0 | 0            | 0 |
| 0 | 0            | 0 | 0            | 0 | -0.094129474 | 0 | 0            | 0 |
| 0 | 0            | 0 | 0            | 0 | -0.13760787  | 0 | 0            | 0 |
| 0 | 0            | 0 | 0            | 0 | -0.092552484 | 0 | -0.014806199 | 0 |
| 0 | -0.010526685 | 0 | 0            | 0 | -0.093876932 | 0 | 0            | 0 |
| 0 | 0            | 0 | 0            | 0 | -0.093378547 | 0 | 0            | 0 |

|   |              |   |              |   |              |   |              |   |
|---|--------------|---|--------------|---|--------------|---|--------------|---|
| 0 | 0            | 0 | -0.002301921 | 0 | -0.09098212  | 0 | 0            | 0 |
| 0 | 0            | 0 | -0.09106355  | 0 | 0            | 0 | 0            | 0 |
| 0 | 0            | 0 | 0            | 0 | -0.1253018   | 0 | 0.015854768  | 0 |
| 0 | -0.022312485 | 0 | 0            | 0 | -0.13164204  | 0 | 0            | 0 |
| 0 | 0            | 0 | -0.08982553  | 0 | 0            | 0 | -0.015610683 | 0 |
| 0 | 0            | 0 | -0.13434718  | 0 | 0            | 0 | 0            | 0 |
| 0 | 0            | 0 | 0            | 0 | -0.13728006  | 0 | 0            | 0 |
| 0 | 0            | 0 | 0            | 0 | -0.13112465  | 0 | 0            | 0 |
| 0 | -0.010052013 | 0 | -0.091010232 | 0 | 0            | 0 | 0            | 0 |
| 0 | 0            | 0 | -0.036057589 | 0 | -0.094786709 | 0 | 0            | 0 |
| 0 | 0            | 0 | -0.090528121 | 0 | 0            | 0 | 0            | 0 |
| 0 | 0            | 0 | 0            | 0 | -0.12827388  | 0 | 0            | 0 |
| 0 | -0.021612799 | 0 | -0.12882597  | 0 | 0            | 0 | 0            | 0 |
| 0 | 0            | 0 | -0.12276013  | 0 | 0            | 0 | 0.014633439  | 0 |
| 0 | 0            | 0 | -0.13410601  | 0 | 0            | 0 | 0            | 0 |
| 0 | 0            | 0 | -0.12833463  | 0 | 0            | 0 | 0            | 0 |
| 0 | 0            | 0 | -0.12606274  | 0 | 0            | 0 | 0            | 0 |
| 0 | -1.0725662   | 0 | 0            | 0 | 0            | 0 | 0            | 0 |
| 0 | -1.0761811   | 0 | 0            | 0 | 0            | 0 | 0            | 0 |
| 0 | 0            | 0 | 0            | 0 | -0.12448688  | 0 | 0            | 0 |
| 0 | 0            | 0 | 0            | 0 | -0.13619565  | 0 | 0.065286541  | 0 |
| 0 | 0            | 0 | -0.12198866  | 0 | 0            | 0 | 0            | 0 |
| 0 | 0            | 0 | -0.13290865  | 0 | 0            | 0 | 0.063298416  | 0 |
| 0 | 0            | 0 | 0            | 0 | -0.11989172  | 0 | 0            | 0 |
| 0 | 0            | 0 | 0            | 0 | 0            | 0 | 0            | 0 |
| 0 | -0.062426881 | 0 | 0            | 0 | 0            | 0 | 0            | 0 |
| 0 | 0            | 0 | -0.11716583  | 0 | 0            | 0 | 0            | 0 |
| 0 | 0            | 0 | 0            | 0 | 0            | 0 | 0            | 0 |
| 0 | 0            | 0 | 0            | 0 | 0            | 0 | 0            | 0 |
| 0 | 0            | 0 | 0            | 0 | 0            | 0 | -0.015074387 | 0 |
| 0 | 0            | 0 | 0            | 0 | 0            | 0 | 0            | 0 |
| 0 | 0            | 0 | 0            | 0 | 0            | 0 | 0            | 0 |
| 0 | 0            | 0 | 0            | 0 | -0.11051401  | 0 | 0.0280406    | 0 |
| 0 | -0.003958275 | 0 | 0            | 0 | 0            | 0 | 0            | 0 |
| 0 | 0            | 0 | 0            | 0 | 0            | 0 | 0            | 0 |
| 0 | 0            | 0 | 0            | 0 | -0.10505684  | 0 | 0            | 0 |
| 0 | 0            | 0 | 0            | 0 | 0            | 0 | 0            | 0 |
| 0 | 0            | 0 | 0            | 0 | 0            | 0 | -0.011455933 | 0 |
| 0 | 0            | 0 | -0.10857962  | 0 | 0            | 0 | 0.026325475  | 0 |
| 0 | 0            | 0 | 0            | 0 | 0            | 0 | 0            | 0 |
| 0 | 0            | 0 | 0            | 0 | 0            | 0 | 0            | 0 |
| 0 | 0            | 0 | -0.10347515  | 0 | 0            | 0 | 0            | 0 |
| 0 | 0            | 0 | 0            | 0 | 0            | 0 | 0            | 0 |
| 0 | 0            | 0 | 0            | 0 | -0.10891338  | 0 | 0.029170165  | 0 |
| 0 | 0            | 0 | -0.043262263 | 0 | -0.070146676 | 0 | 0            | 0 |
| 0 | -0.006963439 | 0 | 0            | 0 | -0.11288564  | 0 | 0            | 0 |
| 0 | 0            | 0 | 0            | 0 | -0.11232997  | 0 | 0            | 0 |

|   |              |   |              |   |              |              |             |
|---|--------------|---|--------------|---|--------------|--------------|-------------|
| 0 | 0            | 0 | 0            | 0 | 0            | -0.018451707 | 0           |
| 0 | -0.006673545 | 0 | -0.11135162  | 0 | 0            | 0            | 0           |
| 0 | 0            | 0 | -0.11081094  | 0 | 0            | 0            | 0           |
| 0 | 0            | 0 | -0.10681906  | 0 | 0            | 0.028091882  | 0           |
| 0 | 0            | 0 | 0            | 0 | 0            | -0.018902712 | 0           |
| 0 | 0            | 0 | 0            | 0 | 0            | -0.017783017 | 0           |
| 0 | 0            | 0 | 0            | 0 | 0            | 0            | 0           |
| 0 | -0.005365281 | 0 | 0            | 0 | 0            | 0            | 0           |
| 0 | -0.009751488 | 0 | 0            | 0 | 0            | -0.021181555 | 0           |
| 0 | 0            | 0 | 0            | 0 | 0            | 0            | 0           |
| 0 | 0            | 0 | 0            | 0 | 0            | 0            | 0           |
| 0 | 0            | 0 | 0            | 0 | 0            | -0.019186309 | 0           |
| 0 | 0            | 0 | 0            | 0 | 0            | 0            | 0           |
| 0 | 0            | 0 | 0            | 0 | 0            | 0            | 0           |
| 0 | -0.002960112 | 0 | 0            | 0 | 0            | 0            | 0           |
| 0 | -0.001469289 | 0 | 0            | 0 | 0            | 0            | 0           |
| 0 | -1.0576795   | 0 | 0            | 0 | 0            | 0            | 0           |
| 0 | 0            | 0 | -0.028767686 | 0 | -0.080074011 | 0            | 0           |
| 0 | -0.006573248 | 0 | 0            | 0 | -0.10843645  | 0            | 0           |
| 0 | 0            | 0 | 0            | 0 | -0.10785159  | 0            | 0           |
| 0 | -0.006205081 | 0 | -0.10667078  | 0 | 0            | 0            | 0           |
| 0 | 0            | 0 | -0.10609938  | 0 | 0            | 0            | 0           |
| 0 | 0            | 0 | 0            | 0 | -0.12146498  | 0            | 0.058862219 |
| 0 | 0            | 0 | 0            | 0 | 0            | 0            | 0           |
| 0 | 0.005074473  | 0 | 0            | 0 | 0            | 0            | 0           |
| 0 | 0.011698256  | 0 | 0            | 0 | -0.12240589  | 0            | 0.058086654 |
| 0 | 0            | 0 | -0.038662615 | 0 | -0.085982736 | 0            | 0.056151681 |
| 0 | 0            | 0 | -0.11953065  | 0 | 0            | 0            | 0.057182807 |
| 0 | 0.011555594  | 0 | -0.12048431  | 0 | 0            | 0            | 0.056388123 |
| 0 | -1.1263565   | 0 | -0.1480936   | 0 | 0            | 0            | 0           |
| 0 | -1.126226    | 0 | 0            | 0 | -0.1494006   | 0            | 0           |
| 0 | -0.099951089 | 0 | 0            | 0 | -0.18149372  | 0            | 0           |
| 0 | -0.096021914 | 0 | -0.17754663  | 0 | 0            | 0            | 0           |
| 0 | 0            | 0 | 0            | 0 | -0.17816754  | 0            | 0           |
| 0 | 0            | 0 | -0.17438146  | 0 | 0            | 0            | 0           |
| 0 | -1.1694059   | 0 | 0            | 0 | 0            | 0            | 0           |
| 0 | 0            | 0 | 0            | 0 | 0            | 0            | 0           |
| 0 | 0            | 0 | 0            | 0 | 0            | 0.010310681  | 0           |
| 0 | 0            | 0 | 0            | 0 | 0            | 0            | 0           |
| 0 | 0            | 0 | 0            | 0 | 0            | 0            | 0           |
| 0 | 0            | 0 | 0            | 0 | 0            | 0            | 0           |
| 0 | 0.005443924  | 0 | 0            | 0 | 0            | 0            | 0           |
| 0 | 0            | 0 | 0            | 0 | 0            | 0            | 0           |
| 0 | 0            | 0 | 0            | 0 | 0            | 0.01039817   | 0           |
| 0 | 0            | 0 | 0            | 0 | 0            | 0            | 0           |
| 0 | 0            | 0 | -0.081084036 | 0 | -0.079984532 | 0            | 0           |
| 0 | 0            | 0 | 0            | 0 | 0            | 0            | 0           |

|   |              |   |              |   |              |             |   |
|---|--------------|---|--------------|---|--------------|-------------|---|
| 0 | 0.005495417  | 0 | 0            | 0 | 0            | 0           | 0 |
| 0 | 0            | 0 | 0            | 0 | 0            | 0.022781234 | 0 |
| 0 | 0            | 0 | 0            | 0 | 0            | 0.020182264 | 0 |
| 0 | 0.013140913  | 0 | 0            | 0 | 0            | 0.021609737 | 0 |
| 0 | 0            | 0 | 0            | 0 | 0            | 0.022568056 | 0 |
| 0 | 0            | 0 | 0            | 0 | 0            | 0           | 0 |
| 0 | 0            | 0 | 0            | 0 | 0            | 0           | 0 |
| 0 | 0.005239233  | 0 | 0            | 0 | 0            | 0           | 0 |
| 0 | 0            | 0 | 0            | 0 | 0            | 0           | 0 |
| 0 | 0.016202509  | 0 | 0            | 0 | 0            | 0           | 0 |
| 0 | -1.0786083   | 0 | 0            | 0 | 0            | 0           | 0 |
| 0 | -1.0596609   | 0 | 0            | 0 | 0            | 0           | 0 |
| 0 | 0            | 0 | 0            | 0 | 0            | 0.019207752 | 0 |
| 0 | 0            | 0 | 0            | 0 | 0            | 0           | 0 |
| 0 | 0            | 0 | 0            | 0 | 0            | 0           | 0 |
| 0 | -0.005878091 | 0 | 0            | 0 | 0            | 0           | 0 |
| 0 | 0            | 0 | 0            | 0 | 0            | 0           | 0 |
| 0 | 0            | 0 | 0            | 0 | 0            | 0           | 0 |
| 0 | -0.004783292 | 0 | -0.084084243 | 0 | -0.065358664 | 0           | 0 |
| 0 | 0            | 0 | -0.083931678 | 0 | -0.064897547 | 0           | 0 |
| 0 | 0            | 0 | 0            | 0 | 0            | 0.032589471 | 0 |
| 0 | 0            | 0 | 0            | 0 | 0            | 0.046544834 | 0 |
| 0 | 0            | 0 | 0            | 0 | 0            | 0.04485396  | 0 |
| 0 | 0            | 0 | 0            | 0 | 0            | 0.015931263 | 0 |
| 0 | 0.006717772  | 0 | 0            | 0 | 0            | 0.043554375 | 0 |
| 0 | 0            | 0 | 0            | 0 | 0            | 0.033895893 | 0 |
| 0 | 0            | 0 | 0            | 0 | 0            | 0.040991254 | 0 |
| 0 | 0            | 0 | 0            | 0 | 0            | 0           | 0 |
| 0 | 0.002425323  | 0 | 0            | 0 | 0            | 0           | 0 |
| 0 | -0.044814023 | 0 | 0            | 0 | 0            | 0           | 0 |
| 0 | 0            | 0 | 0            | 0 | 0            | 0           | 0 |
| 0 | -0.004549886 | 0 | 0            | 0 | 0            | 0           | 0 |
| 0 | 0            | 0 | 0            | 0 | 0            | 0           | 0 |
| 0 | 0            | 0 | 0            | 0 | 0            | 0           | 0 |
| 0 | -1.0882566   | 0 | 0            | 0 | 0            | 0.085588479 | 0 |
| 0 | 0            | 0 | 0            | 0 | 0            | 0.030253086 | 0 |
| 0 | 0            | 0 | 0            | 0 | 0            | 0.037457716 | 0 |
| 0 | -0.042127074 | 0 | 0            | 0 | 0            | 0           | 0 |
| 0 | 0.012071314  | 0 | 0            | 0 | 0            | 0.028614029 | 0 |
| 0 | 0.014652208  | 0 | 0            | 0 | 0            | 0.036094723 | 0 |
| 0 | 0            | 0 | 0            | 0 | 0            | 0           | 0 |
| 0 | 0            | 0 | 0            | 0 | 0            | 0           | 0 |
| 0 | -0.002313163 | 0 | 0            | 0 | 0            | 0           | 0 |
| 0 | -1.1036374   | 0 | 0            | 0 | -0.13049558  | 0           | 0 |
| 0 | -1.1031248   | 0 | -0.12646326  | 0 | 0            | 0           | 0 |
| 0 | 0            | 0 | 0            | 0 | 0            | 0.089135646 | 0 |
| 0 | -0.003471741 | 0 | 0            | 0 | 0            | 0.08937421  | 0 |

|   |              |   |              |   |             |   |              |   |
|---|--------------|---|--------------|---|-------------|---|--------------|---|
| 0 | -0.12100396  | 0 | 0            | 0 | -0.12865823 | 0 | 0            | 0 |
| 0 | 0            | 0 | 0            | 0 | -0.14398527 | 0 | 0            | 0 |
| 0 | -0.074975102 | 0 | 0            | 0 | -0.1540113  | 0 | 0            | 0 |
| 0 | 0            | 0 | 0            | 0 | -0.16021389 | 0 | 0            | 0 |
| 0 | -0.11576747  | 0 | -0.12268646  | 0 | 0           | 0 | 0            | 0 |
| 0 | 0            | 0 | -0.13832396  | 0 | 0           | 0 | 0            | 0 |
| 0 | 0            | 0 | 0            | 0 | -0.16000462 | 0 | 0            | 0 |
| 0 | -0.007553041 | 0 | 0            | 0 | -0.15852614 | 0 | 0            | 0 |
| 0 | 0            | 0 | -0.022606608 | 0 | -0.13602753 | 0 | 0            | 0 |
| 0 | 0            | 0 | 0            | 0 | -0.12571201 | 0 | 0            | 0 |
| 0 | 0            | 0 | 0            | 0 | -0.1578105  | 0 | 0.002547358  | 0 |
| 0 | 0            | 0 | 0            | 0 | -0.15792155 | 0 | 0            | 0 |
| 0 | 0            | 0 | 0            | 0 | -0.15798826 | 0 | 0            | 0 |
| 0 | 0            | 0 | 0            | 0 | -0.15048653 | 0 | 0            | 0 |
| 0 | -0.070210235 | 0 | -0.14779105  | 0 | 0           | 0 | 0            | 0 |
| 0 | 0            | 0 | -0.15477896  | 0 | 0           | 0 | 0            | 0 |
| 0 | -1.1054199   | 0 | 0            | 0 | -0.09545654 | 0 | 0            | 0 |
| 0 | 0            | 0 | -0.11989883  | 0 | 0           | 0 | 0            | 0 |
| 0 | -0.00688779  | 0 | -0.1533532   | 0 | 0           | 0 | 0            | 0 |
| 0 | 0            | 0 | -0.15419802  | 0 | 0           | 0 | 0            | 0 |
| 0 | 0            | 0 | 0            | 0 | -0.11299021 | 0 | 0            | 0 |
| 0 | 0            | 0 | -0.15271574  | 0 | 0           | 0 | 0            | 0 |
| 0 | 0            | 0 | -0.15274366  | 0 | 0           | 0 | 0.001711906  | 0 |
| 0 | 0            | 0 | -0.15283143  | 0 | 0           | 0 | 0            | 0 |
| 0 | 0            | 0 | 0            | 0 | -0.14351319 | 0 | 0            | 0 |
| 0 | 0            | 0 | -0.14438755  | 0 | 0           | 0 | 0            | 0 |
| 0 | 0            | 0 | 0            | 0 | -0.13302956 | 0 | 0            | 0 |
| 0 | 0            | 0 | 0            | 0 | -0.13742392 | 0 | 0            | 0 |
| 0 | 0            | 0 | 0            | 0 | -0.13770597 | 0 | -0.003112047 | 0 |
| 0 | -1.1064854   | 0 | 0            | 0 | -0.13292198 | 0 | 0            | 0 |
| 0 | 0            | 0 | -0.00678523  | 0 | -0.13042992 | 0 | 0            | 0 |
| 0 | -1.1048562   | 0 | -0.092631159 | 0 | 0           | 0 | 0            | 0 |
| 0 | 0            | 0 | 0            | 0 | -0.1421643  | 0 | 0            | 0 |
| 0 | 0            | 0 | -0.10928254  | 0 | 0           | 0 | 0            | 0 |
| 0 | -1.1063078   | 0 | -0.13013126  | 0 | 0           | 0 | 0            | 0 |
| 0 | 0            | 0 | 0            | 0 | -0.14029311 | 0 | -0.008027624 | 0 |
| 0 | 0            | 0 | 0            | 0 | -0.11477359 | 0 | 0            | 0 |
| 0 | -0.007560904 | 0 | 0            | 0 | -0.13952933 | 0 | 0            | 0 |
| 0 | 0            | 0 | 0            | 0 | -0.13548564 | 0 | 0            | 0 |
| 0 | 0            | 0 | -0.007358443 | 0 | -0.13177439 | 0 | 0            | 0 |
| 0 | 0            | 0 | 0            | 0 | -0.13897297 | 0 | 0            | 0 |
| 0 | 0            | 0 | -0.1377292   | 0 | 0           | 0 | 0            | 0 |
| 0 | -0.012612999 | 0 | 0            | 0 | -0.13426784 | 0 | -0.015703499 | 0 |
| 0 | 0            | 0 | -0.12705249  | 0 | 0           | 0 | 0            | 0 |
| 0 | 0            | 0 | 0            | 0 | -0.13321592 | 0 | -0.014253104 | 0 |
| 0 | 0            | 0 | -0.010022744 | 0 | -0.12286276 | 0 | -0.013615566 | 0 |
| 0 | 0            | 0 | 0            | 0 | -0.13256603 | 0 | -0.013398429 | 0 |

|   |              |   |              |   |              |   |              |   |
|---|--------------|---|--------------|---|--------------|---|--------------|---|
| 0 | 0            | 0 | 0            | 0 | -0.13265706  | 0 | -0.013483674 | 0 |
| 0 | 0            | 0 | -0.13320961  | 0 | 0            | 0 | -0.00375908  | 0 |
| 0 | 0            | 0 | -0.13256963  | 0 | 0            | 0 | 0            | 0 |
| 0 | -0.007480201 | 0 | 0            | 0 | -0.13372857  | 0 | 0            | 0 |
| 0 | 0            | 0 | -0.11196057  | 0 | 0            | 0 | 0            | 0 |
| 0 | -0.008776847 | 0 | 0            | 0 | -0.12914636  | 0 | 0            | 0 |
| 0 | 0            | 0 | -0.008600306 | 0 | -0.12507979  | 0 | 0            | 0 |
| 0 | 0            | 0 | 0            | 0 | -0.1331666   | 0 | 0            | 0 |
| 0 | -0.007862442 | 0 | -0.006207567 | 0 | -0.12319015  | 0 | 0            | 0 |
| 0 | 0            | 0 | 0            | 0 | -0.13337703  | 0 | 0            | 0 |
| 0 | 0            | 0 | -0.006502611 | 0 | -0.12217596  | 0 | 0            | 0 |
| 0 | 0            | 0 | 0            | 0 | -0.12860611  | 0 | 0            | 0 |
| 0 | 0            | 0 | -0.006117024 | 0 | -0.1226909   | 0 | 0            | 0 |
| 0 | 0            | 0 | 0            | 0 | -0.11727147  | 0 | 0            | 0 |
| 0 | 0            | 0 | -0.13684369  | 0 | 0            | 0 | 0            | 0 |
| 0 | 0            | 0 | -0.13506973  | 0 | 0            | 0 | -0.008843893 | 0 |
| 0 | 0            | 0 | -0.12928713  | 0 | 0            | 0 | 0            | 0 |
| 0 | -0.006932666 | 0 | -0.13402986  | 0 | 0            | 0 | 0            | 0 |
| 0 | 0            | 0 | -0.13349143  | 0 | 0            | 0 | 0            | 0 |
| 0 | -0.011979811 | 0 | -0.13026233  | 0 | 0            | 0 | -0.015664125 | 0 |
| 0 | 0            | 0 | -0.12921825  | 0 | 0            | 0 | -0.014206586 | 0 |
| 0 | 0            | 0 | -0.12856987  | 0 | 0            | 0 | -0.013368589 | 0 |
| 0 | 0            | 0 | -0.12705179  | 0 | 0            | 0 | -0.014688584 | 0 |
| 0 | 0            | 0 | 0            | 0 | -0.11112324  | 0 | 0            | 0 |
| 0 | 0            | 0 | -0.11314614  | 0 | 0            | 0 | 0            | 0 |
| 0 | -0.008489708 | 0 | -0.1250874   | 0 | 0            | 0 | 0            | 0 |
| 0 | -0.006991287 | 0 | -0.1280004   | 0 | 0            | 0 | 0            | 0 |
| 0 | 0            | 0 | -0.12731456  | 0 | 0            | 0 | 0            | 0 |
| 0 | 0            | 0 | -0.12767355  | 0 | 0            | 0 | 0            | 0 |
| 0 | 0            | 0 | -0.12455075  | 0 | 0            | 0 | 0            | 0 |
| 0 | 0            | 0 | 0            | 0 | -0.10618734  | 0 | 0            | 0 |
| 0 | 0            | 0 | -0.10737086  | 0 | 0            | 0 | 0            | 0 |
| 0 | 0            | 0 | 0            | 0 | -0.10526017  | 0 | -0.00219962  | 0 |
| 0 | 0            | 0 | 0.002195407  | 0 | -0.10759332  | 0 | 0            | 0 |
| 0 | -0.092187554 | 0 | 0            | 0 | -0.15782867  | 0 | 0            | 0 |
| 0 | 0            | 0 | 0            | 0 | -0.10166571  | 0 | 0            | 0 |
| 0 | -0.012890721 | 0 | 0            | 0 | -0.10178357  | 0 | 0            | 0 |
| 0 | 0            | 0 | 0            | 0 | -0.10036193  | 0 | -0.009407083 | 0 |
| 0 | 0            | 0 | 0            | 0 | -0.10129178  | 0 | 0            | 0 |
| 0 | 0            | 0 | -0.008846302 | 0 | -0.092343701 | 0 | 0            | 0 |
| 0 | 0            | 0 | -0.10212239  | 0 | 0            | 0 | 0            | 0 |
| 0 | 0            | 0 | -0.098756337 | 0 | 0            | 0 | 0            | 0 |
| 0 | 0            | 0 | -0.10133836  | 0 | 0            | 0 | -0.003579534 | 0 |
| 0 | -0.012403656 | 0 | -0.099050341 | 0 | 0            | 0 | 0            | 0 |
| 0 | 0            | 0 | -0.097715177 | 0 | 0            | 0 | -0.01028259  | 0 |
| 0 | -0.087776534 | 0 | -0.15284551  | 0 | 0            | 0 | 0            | 0 |
| 0 | 0            | 0 | -0.098573104 | 0 | 0            | 0 | 0            | 0 |



|   |              |   |              |   |              |   |              |   |
|---|--------------|---|--------------|---|--------------|---|--------------|---|
| 0 | 0            | 0 | 0            | 0 | -0.15445663  | 0 | 0            | 0 |
| 0 | -0.017949662 | 0 | 0            | 0 | -0.10716297  | 0 | 0            | 0 |
| 0 | 0            | 0 | 0            | 0 | -0.10477337  | 0 | -0.013424802 | 0 |
| 0 | 0            | 0 | 0            | 0 | -0.10640451  | 0 | 0            | 0 |
| 0 | 0            | 0 | -0.008958659 | 0 | -0.096814399 | 0 | 0            | 0 |
| 0 | -0.01732482  | 0 | -0.10408948  | 0 | 0            | 0 | 0            | 0 |
| 0 | 0            | 0 | -0.10187052  | 0 | 0            | 0 | -0.014341719 | 0 |
| 0 | 0            | 0 | -0.14962005  | 0 | 0            | 0 | 0            | 0 |
| 0 | 0            | 0 | -0.1033495   | 0 | 0            | 0 | 0            | 0 |
| 0 | 0            | 0 | 0            | 0 | -0.13227257  | 0 | 0.026827104  | 0 |
| 0 | 0            | 0 | -0.12889325  | 0 | 0            | 0 | 0.024997614  | 0 |
| 0 | 0            | 0 | 0            | 0 | -0.093481239 | 0 | -0.01339325  | 0 |
| 0 | 0            | 0 | 0            | 0 | -0.13524835  | 0 | 0.024831375  | 0 |
| 0 | -0.010971062 | 0 | 0            | 0 | -0.094827631 | 0 | 0            | 0 |
| 0 | -0.016780498 | 0 | 0            | 0 | -0.093426634 | 0 | -0.01883712  | 0 |
| 0 | 0            | 0 | 0            | 0 | -0.13268637  | 0 | 0            | 0 |
| 0 | 0            | 0 | 0            | 0 | -0.094322639 | 0 | 0            | 0 |
| 0 | 0            | 0 | 0.000691745  | 0 | -0.09480094  | 0 | 0            | 0 |
| 0 | 0            | 0 | -0.036800454 | 0 | -0.10143735  | 0 | 0            | 0 |
| 0 | -0.11301213  | 0 | 0            | 0 | -0.14685261  | 0 | 0            | 0 |
| 0 | 0            | 0 | 0            | 0 | -0.13961789  | 0 | 0            | 0 |
| 0 | 0            | 0 | 0            | 0 | -0.092969884 | 0 | -0.016812038 | 0 |
| 0 | 0            | 0 | -0.003922708 | 0 | -0.088745655 | 0 | -0.01483119  | 0 |
| 0 | -0.025125219 | 0 | 0            | 0 | -0.14012786  | 0 | 0            | 0 |
| 0 | -0.010526436 | 0 | -0.002288615 | 0 | -0.091656537 | 0 | 0            | 0 |
| 0 | 0            | 0 | -0.090498569 | 0 | 0            | 0 | -0.014299443 | 0 |
| 0 | -0.017265124 | 0 | 0            | 0 | -0.12736348  | 0 | 0.012715693  | 0 |
| 0 | 0            | 0 | -0.002294905 | 0 | -0.091152062 | 0 | 0            | 0 |
| 0 | -0.016571501 | 0 | -0.09068642  | 0 | 0            | 0 | -0.019597955 | 0 |
| 0 | -0.010453116 | 0 | -0.091705257 | 0 | 0            | 0 | 0            | 0 |
| 0 | 0            | 0 | -0.13174253  | 0 | 0            | 0 | 0.022855601  | 0 |
| 0 | 0            | 0 | 0            | 0 | -0.12831574  | 0 | 0.019441052  | 0 |
| 0 | 0            | 0 | 0            | 0 | -0.12633068  | 0 | 0.014264781  | 0 |
| 0 | 0            | 0 | 0            | 0 | -0.13919647  | 0 | 0            | 0 |
| 0 | 0            | 0 | -0.028329078 | 0 | -0.097615259 | 0 | 0.015311376  | 0 |
| 0 | -0.022255822 | 0 | -0.035632895 | 0 | -0.096600884 | 0 | 0            | 0 |
| 0 | 0            | 0 | -0.091218643 | 0 | 0            | 0 | 0            | 0 |
| 0 | 0            | 0 | -0.12990057  | 0 | 0            | 0 | 0            | 0 |
| 0 | 0            | 0 | 0            | 0 | -0.13355188  | 0 | 0            | 0 |
| 0 | -1.0626216   | 0 | 0            | 0 | 0            | 0 | 0            | 0 |
| 0 | -0.022058938 | 0 | 0            | 0 | -0.13043888  | 0 | 0            | 0 |
| 0 | 0            | 0 | -0.09023146  | 0 | 0            | 0 | -0.017570366 | 0 |
| 0 | 0            | 0 | -0.039538961 | 0 | -0.098636791 | 0 | 0            | 0 |
| 0 | 0            | 0 | -0.13616139  | 0 | 0            | 0 | 0            | 0 |
| 0 | 0            | 0 | -0.035767268 | 0 | -0.095951295 | 0 | 0            | 0 |
| 0 | -0.10861471  | 0 | -0.14242782  | 0 | 0            | 0 | 0            | 0 |
| 0 | -0.024234056 | 0 | -0.1367468   | 0 | 0            | 0 | 0            | 0 |

|   |              |   |              |              |   |              |
|---|--------------|---|--------------|--------------|---|--------------|
| 0 | 0            | 0 | 0            | -0.12966672  | 0 | 0            |
| 0 | 0            | 0 | -0.034525223 | -0.0948179   | 0 | 0            |
| 0 | -0.017043517 | 0 | -0.12479741  | 0            | 0 | 0.011505216  |
| 0 | 0            | 0 | -0.13585189  | 0            | 0 | 0            |
| 0 | 0            | 0 | -0.12588674  | 0            | 0 | 0.018253238  |
| 0 | 0            | 0 | -0.12376382  | 0            | 0 | 0.013069462  |
| 0 | -0.021468062 | 0 | -0.12812167  | 0            | 0 | 0            |
| 0 | 0            | 0 | -0.1307448   | 0            | 0 | 0            |
| 0 | -0.11002748  | 0 | 0            | -0.14171228  | 0 | 0            |
| 0 | 0            | 0 | -0.12736826  | 0            | 0 | 0            |
| 0 | 0            | 0 | 0            | -0.1437949   | 0 | 0            |
| 0 | -1.1161578   | 0 | 0            | -0.11426087  | 0 | 0            |
| 0 | -1.1751301   | 0 | 0            | -0.10822358  | 0 | 0            |
| 0 | -1.1160571   | 0 | -0.11274079  | 0            | 0 | 0            |
| 0 | -1.0218394   | 0 | 0            | 0            | 0 | 0            |
| 0 | 0            | 0 | -0.13953156  | 0            | 0 | 0            |
| 0 | -0.091649155 | 0 | 0            | -0.15661172  | 0 | 0.063286136  |
| 0 | -1.1736665   | 0 | -0.10639216  | 0            | 0 | 0            |
| 0 | -0.10528739  | 0 | -0.13705381  | 0            | 0 | 0            |
| 0 | 0            | 0 | 0            | -0.13859759  | 0 | 0            |
| 0 | -1.0697974   | 0 | 0            | 0            | 0 | 0            |
| 0 | -1.0695627   | 0 | 0            | 0            | 0 | -0.018188879 |
| 0 | -1.0716364   | 0 | 0            | 0            | 0 | 0            |
| 0 | -1.0698257   | 0 | 0            | 0            | 0 | 0            |
| 0 | 0            | 0 | 0            | -0.12364173  | 0 | 0.038933318  |
| 0 | -0.087178012 | 0 | -0.15166292  | 0            | 0 | 0.061151622  |
| 0 | 0            | 0 | 0            | -0.1531426   | 0 | 0.063619848  |
| 0 | -1.1257702   | 0 | 0            | -0.1231857   | 0 | 0.058837387  |
| 0 | -1.1253442   | 0 | -0.12124601  | 0            | 0 | 0.057129072  |
| 0 | 0            | 0 | -0.13411123  | 0            | 0 | 0            |
| 0 | 0            | 0 | -0.12030293  | 0            | 0 | 0.036703736  |
| 0 | -1.075965    | 0 | 0            | 0            | 0 | 0            |
| 0 | 0            | 0 | 0            | -0.12320599  | 0 | 0.041867597  |
| 0 | 0            | 0 | -0.14832821  | 0            | 0 | 0.061527633  |
| 0 | 0            | 0 | 0            | -0.11711525  | 0 | 0            |
| 0 | 0            | 0 | -0.11454419  | 0            | 0 | 0            |
| 0 | -0.062521019 | 0 | 0            | 0            | 0 | 0            |
| 0 | 0            | 0 | -0.11974751  | 0            | 0 | 0.040215652  |
| 0 | 0            | 0 | -0.039026954 | -0.086337399 | 0 | 0            |
| 0 | 0            | 0 | 0            | 0            | 0 | 0            |
| 0 | 0            | 0 | -0.028186089 | -0.10861067  | 0 | 0.064631232  |
| 0 | -1.1205449   | 0 | 0            | -0.17966803  | 0 | 0            |
| 0 | -0.090231814 | 0 | 0            | 0            | 0 | 0            |
| 0 | -1.1205825   | 0 | -0.17586391  | 0            | 0 | 0            |
| 0 | -0.068850238 | 0 | 0            | 0            | 0 | -0.020272907 |
| 0 | 0            | 0 | -0.02442074  | -0.096183064 | 0 | 0            |
| 0 | 0            | 0 | 0            | 0            | 0 | 0            |

|   |              |   |              |   |              |              |              |
|---|--------------|---|--------------|---|--------------|--------------|--------------|
| 0 | -0.062144065 | 0 | 0            | 0 | 0            | 0            | 0            |
| 0 | 0            | 0 | 0            | 0 | 0            | 0            | 0            |
| 0 | 0            | 0 | 0            | 0 | 0            | -0.007922641 | 0            |
| 0 | 0            | 0 | 0            | 0 | 0            | 0            | 0            |
| 0 | 0            | 0 | 0            | 0 | 0            | 0            | 0            |
| 0 | -0.06333686  | 0 | 0            | 0 | 0            | 0            | 0            |
| 0 | 0            | 0 | 0            | 0 | 0            | 0            | 0            |
| 0 | 0            | 0 | 0            | 0 | 0            | -0.018539432 | 0            |
| 0 | 0            | 0 | 0            | 0 | 0            | 0            | 0            |
| 0 | 0            | 0 | 0            | 0 | 0            | -0.014616565 | 0            |
| 0 | 0            | 0 | 0            | 0 | 0            | 0            | 0            |
| 0 | -0.006860959 | 0 | 0            | 0 | 0            | 0            | 0            |
| 0 | 0            | 0 | 0            | 0 | 0            | 0            | 0            |
| 0 | 0            | 0 | 0            | 0 | 0            | 0            | 0            |
| 0 | 0            | 0 | 0            | 0 | -0.10613107  | 0            | 0.020743388  |
| 0 | 0            | 0 | 0            | 0 | 0            | 0            | -0.015175087 |
| 0 | 0            | 0 | 0            | 0 | 0            | 0            | 0            |
| 0 | 0            | 0 | 0            | 0 | 0            | 0            | -0.014172466 |
| 0 | -0.009713757 | 0 | 0            | 0 | 0            | 0            | -0.017412743 |
| 0 | 0            | 0 | 0            | 0 | 0            | 0            | -0.015552418 |
| 0 | 0            | 0 | 0            | 0 | 0            | 0            | 0            |
| 0 | -0.002789749 | 0 | 0            | 0 | 0            | 0            | 0            |
| 0 | 0            | 0 | 0            | 0 | 0            | 0            | 0            |
| 0 | 0            | 0 | 0            | 0 | -0.10970578  | 0            | 0.029751531  |
| 0 | -0.004194329 | 0 | 0            | 0 | 0            | 0            | 0            |
| 0 | 0            | 0 | -0.03234153  | 0 | -0.078967604 | 0            | 0.027459321  |
| 0 | 0            | 0 | 0            | 0 | 0            | 0            | 0            |
| 0 | 0.001665258  | 0 | 0            | 0 | -0.11037831  | 0            | 0.028321227  |
| 0 | 0            | 0 | -0.10423104  | 0 | 0            | 0            | 0.01948329   |
| 0 | 0            | 0 | -0.030233651 | 0 | -0.07572822  | 0            | 0            |
| 0 | 0            | 0 | 0            | 0 | 0            | 0            | -0.010541065 |
| 0 | -0.007106372 | 0 | 0            | 0 | -0.10554966  | 0            | 0            |
| 0 | 0            | 0 | 0            | 0 | -0.10498583  | 0            | 0            |
| 0 | 0            | 0 | 0            | 0 | 0            | 0            | 0            |
| 0 | 0            | 0 | 0            | 0 | 0            | 0            | -0.011933451 |
| 0 | 0            | 0 | -0.1077686   | 0 | 0            | 0            | 0.028018064  |
| 0 | 0            | 0 | 0            | 0 | 0            | 0            | -0.011449305 |
| 0 | 0.001472117  | 0 | -0.10845696  | 0 | 0            | 0            | 0.026575713  |
| 0 | 0            | 0 | 0            | 0 | 0            | 0            | 0            |
| 0 | 0            | 0 | 0            | 0 | 0            | 0            | -0.015733333 |
| 0 | -0.006770536 | 0 | -0.1039338   | 0 | 0            | 0            | 0            |
| 0 | 0            | 0 | 0            | 0 | 0            | 0            | 0            |
| 0 | 0            | 0 | -0.10338424  | 0 | 0            | 0            | 0            |
| 0 | -1.098794    | 0 | 0            | 0 | 0            | 0            | 0            |
| 0 | -1.0629395   | 0 | 0            | 0 | 0            | 0            | 0            |
| 0 | -0.008318189 | 0 | 0            | 0 | 0            | 0            | 0            |
| 0 | 0            | 0 | 0            | 0 | 0            | 0            | 0            |



|   |              |   |   |   |   |             |   |
|---|--------------|---|---|---|---|-------------|---|
| 0 | 0            | 0 | 0 | 0 | 0 | 0           | 0 |
| 0 | -1.0715356   | 0 | 0 | 0 | 0 | 0           | 0 |
| 0 | 0.007544002  | 0 | 0 | 0 | 0 | 0           | 0 |
| 0 | -0.004208259 | 0 | 0 | 0 | 0 | 0           | 0 |
| 0 | 0            | 0 | 0 | 0 | 0 | 0.013826614 | 0 |
| 0 | 0            | 0 | 0 | 0 | 0 | 0.014131414 | 0 |
| 0 | 0            | 0 | 0 | 0 | 0 | 0.010951609 | 0 |
| 0 | 0            | 0 | 0 | 0 | 0 | 0           | 0 |
| 0 | 0.009131348  | 0 | 0 | 0 | 0 | 0.012208783 | 0 |
| 0 | 0            | 0 | 0 | 0 | 0 | 0           | 0 |
| 0 | 0            | 0 | 0 | 0 | 0 | 0           | 0 |
| 0 | 0.00324048   | 0 | 0 | 0 | 0 | 0           | 0 |
| 0 | -0.004502518 | 0 | 0 | 0 | 0 | 0           | 0 |
| 0 | 0            | 0 | 0 | 0 | 0 | 0.022844516 | 0 |
| 0 | 0            | 0 | 0 | 0 | 0 | 0.020987299 | 0 |
| 0 | 0.01093563   | 0 | 0 | 0 | 0 | 0.021687971 | 0 |
| 0 | 0            | 0 | 0 | 0 | 0 | 0.022436431 | 0 |
| 0 | 0.012543128  | 0 | 0 | 0 | 0 | 0.021810012 | 0 |
| 0 | 0            | 0 | 0 | 0 | 0 | 0           | 0 |
| 0 | -1.0621841   | 0 | 0 | 0 | 0 | 0           | 0 |
| 0 | 0.014236569  | 0 | 0 | 0 | 0 | 0           | 0 |
| 0 | 0            | 0 | 0 | 0 | 0 | 0.024013499 | 0 |
| 0 | -0.049862039 | 0 | 0 | 0 | 0 | 0           | 0 |
| 0 | -0.031373244 | 0 | 0 | 0 | 0 | 0           | 0 |
| 0 | 0            | 0 | 0 | 0 | 0 | 0           | 0 |
| 0 | 0            | 0 | 0 | 0 | 0 | 0.017377729 | 0 |
| 0 | 0            | 0 | 0 | 0 | 0 | 0.021084059 | 0 |
| 0 | 0.000467448  | 0 | 0 | 0 | 0 | 0.019305269 | 0 |
| 0 | 0            | 0 | 0 | 0 | 0 | 0           | 0 |
| 0 | 0            | 0 | 0 | 0 | 0 | 0.023539629 | 0 |
| 0 | -0.004813536 | 0 | 0 | 0 | 0 | 0           | 0 |
| 0 | 0            | 0 | 0 | 0 | 0 | 0           | 0 |
| 0 | 0            | 0 | 0 | 0 | 0 | 0           | 0 |
| 0 | 0            | 0 | 0 | 0 | 0 | 0.037064808 | 0 |
| 0 | 0            | 0 | 0 | 0 | 0 | 0.03494394  | 0 |
| 0 | 0.005761861  | 0 | 0 | 0 | 0 | 0.033553173 | 0 |
| 0 | -0.037053036 | 0 | 0 | 0 | 0 | 0.030584773 | 0 |
| 0 | -0.033681208 | 0 | 0 | 0 | 0 | 0.038716588 | 0 |
| 0 | 0            | 0 | 0 | 0 | 0 | 0.019356252 | 0 |
| 0 | 0            | 0 | 0 | 0 | 0 | 0.046424562 | 0 |
| 0 | -0.004634251 | 0 | 0 | 0 | 0 | 0.046616141 | 0 |
| 0 | 0.007869193  | 0 | 0 | 0 | 0 | 0.017579023 | 0 |
| 0 | 0            | 0 | 0 | 0 | 0 | 0.031999181 | 0 |
| 0 | 0            | 0 | 0 | 0 | 0 | 0.039659674 | 0 |
| 0 | -0.028247721 | 0 | 0 | 0 | 0 | 0           | 0 |
| 0 | 0            | 0 | 0 | 0 | 0 | 0           | 0 |
| 0 | -1.0831007   | 0 | 0 | 0 | 0 | 0.089328535 | 0 |

|   |              |   |              |   |             |   |              |   |
|---|--------------|---|--------------|---|-------------|---|--------------|---|
| 0 | -1.0974429   | 0 | 0            | 0 | -0.12756074 | 0 | 0            | 0 |
| 0 | -1.1010864   | 0 | 0            | 0 | -0.15212837 | 0 | 0            | 0 |
| 0 | -1.0538298   | 0 | 0            | 0 | -0.15611569 | 0 | 0            | 0 |
| 0 | -1.0968136   | 0 | -0.12177582  | 0 | 0           | 0 | 0            | 0 |
| 0 | -1.1006785   | 0 | -0.1460409   | 0 | 0           | 0 | 0            | 0 |
| 0 | -1.0553214   | 0 | -0.15098729  | 0 | 0           | 0 | 0            | 0 |
| 0 | -0.12514348  | 0 | 0            | 0 | -0.13742991 | 0 | 0            | 0 |
| 0 | -1.1032552   | 0 | 0            | 0 | -0.14073644 | 0 | 0            | 0 |
| 0 | -1.1016542   | 0 | 0            | 0 | -0.13478635 | 0 | -0.013547864 | 0 |
| 0 | -1.1040056   | 0 | 0            | 0 | -0.13540332 | 0 | 0            | 0 |
| 0 | -1.1035332   | 0 | 0            | 0 | -0.13041009 | 0 | 0            | 0 |
| 0 | -1.1037377   | 0 | -0.007480437 | 0 | -0.12314844 | 0 | 0            | 0 |
| 0 | -0.11974328  | 0 | -0.13149602  | 0 | 0           | 0 | 0            | 0 |
| 0 | -1.102762    | 0 | -0.13526204  | 0 | 0           | 0 | 0            | 0 |
| 0 | 0            | 0 | 0            | 0 | -0.13481233 | 0 | 0            | 0 |
| 0 | -1.1012      | 0 | -0.13080027  | 0 | 0           | 0 | -0.013518671 | 0 |
| 0 | -1.1033876   | 0 | -0.1297162   | 0 | 0           | 0 | 0            | 0 |
| 0 | -1.1029696   | 0 | -0.12636105  | 0 | 0           | 0 | 0            | 0 |
| 0 | 0            | 0 | -0.12901543  | 0 | 0           | 0 | 0            | 0 |
| 0 | 0            | 0 | 0            | 0 | -0.14343718 | 0 | 0            | 0 |
| 0 | -0.05946104  | 0 | 0            | 0 | -0.1683407  | 0 | 0            | 0 |
| 0 | -0.10366766  | 0 | 0            | 0 | -0.13688061 | 0 | 0            | 0 |
| 0 | -0.12094768  | 0 | 0            | 0 | -0.12936917 | 0 | 0            | 0 |
| 0 | 0            | 0 | 0            | 0 | -0.14581071 | 0 | 0            | 0 |
| 0 | -0.12591808  | 0 | 0            | 0 | -0.12810859 | 0 | -0.016303728 | 0 |
| 0 | -0.11664259  | 0 | 0            | 0 | -0.13092559 | 0 | 0            | 0 |
| 0 | -1.1037541   | 0 | 0            | 0 | -0.15609719 | 0 | 0            | 0 |
| 0 | -0.12106896  | 0 | 0.008058391  | 0 | -0.13649647 | 0 | 0            | 0 |
| 0 | -1.0357614   | 0 | 0            | 0 | -0.1020808  | 0 | 0            | 0 |
| 0 | -1.1030402   | 0 | 0            | 0 | -0.1084063  | 0 | 0            | 0 |
| 0 | -0.009875871 | 0 | 0            | 0 | -0.14447386 | 0 | 0            | 0 |
| 0 | 0            | 0 | 0            | 0 | -0.1661945  | 0 | 0            | 0 |
| 0 | 0            | 0 | 0            | 0 | -0.14342637 | 0 | -0.007525491 | 0 |
| 0 | 0            | 0 | -0.13750081  | 0 | 0           | 0 | 0            | 0 |
| 0 | 0            | 0 | 0            | 0 | -0.1435058  | 0 | 0            | 0 |
| 0 | 0            | 0 | -0.016069389 | 0 | -0.12846567 | 0 | 0            | 0 |
| 0 | 0            | 0 | 0            | 0 | -0.14411481 | 0 | 0            | 0 |
| 0 | 0            | 0 | 0            | 0 | -0.12667269 | 0 | 0            | 0 |
| 0 | -1.0354012   | 0 | -0.099364955 | 0 | 0           | 0 | 0            | 0 |
| 0 | -0.072386706 | 0 | 0            | 0 | -0.15570547 | 0 | 0            | 0 |
| 0 | -1.1035986   | 0 | -0.15126056  | 0 | 0           | 0 | 0            | 0 |
| 0 | -0.075008433 | 0 | -0.008554117 | 0 | -0.14561887 | 0 | 0            | 0 |
| 0 | -0.074875603 | 0 | 0            | 0 | -0.15431902 | 0 | -0.001676324 | 0 |
| 0 | -0.075211674 | 0 | 0            | 0 | -0.15393649 | 0 | 0            | 0 |
| 0 | 0            | 0 | 0            | 0 | -0.1360123  | 0 | 0            | 0 |
| 0 | -1.1025757   | 0 | -0.10537818  | 0 | 0           | 0 | 0            | 0 |
| 0 | 0            | 0 | 0            | 0 | -0.15987747 | 0 | 0.009471149  | 0 |

|   |              |   |              |   |              |   |              |   |
|---|--------------|---|--------------|---|--------------|---|--------------|---|
| 0 | 0            | 0 | -0.021173242 | 0 | -0.13964482  | 0 | 0            | 0 |
| 0 | 0            | 0 | -0.13966177  | 0 | 0            | 0 | 0            | 0 |
| 0 | 0            | 0 | 0            | 0 | -0.16134115  | 0 | 0            | 0 |
| 0 | 0            | 0 | 0            | 0 | -0.16048431  | 0 | 0            | 0 |
| 0 | -0.12110705  | 0 | -0.12225552  | 0 | 0            | 0 | -0.017449832 | 0 |
| 0 | -0.10016951  | 0 | -0.12990703  | 0 | 0            | 0 | 0            | 0 |
| 0 | -0.11561787  | 0 | -0.12314481  | 0 | 0            | 0 | 0            | 0 |
| 0 | -0.11132855  | 0 | -0.12510114  | 0 | 0            | 0 | 0            | 0 |
| 0 | -0.054945428 | 0 | -0.1618406   | 0 | 0            | 0 | 0            | 0 |
| 0 | 0            | 0 | 0            | 0 | -0.12642721  | 0 | 0            | 0 |
| 0 | 0            | 0 | 0            | 0 | -0.12821537  | 0 | 0            | 0 |
| 0 | 0            | 0 | 0            | 0 | -0.12522694  | 0 | -0.014750106 | 0 |
| 0 | 0            | 0 | -0.13776627  | 0 | 0            | 0 | -0.008843    | 0 |
| 0 | -0.009357495 | 0 | -0.13876384  | 0 | 0            | 0 | 0            | 0 |
| 0 | 0            | 0 | -0.13772079  | 0 | 0            | 0 | 0            | 0 |
| 0 | -0.007460815 | 0 | 0            | 0 | -0.16052732  | 0 | 0            | 0 |
| 0 | 0            | 0 | 0            | 0 | -0.16046736  | 0 | 0            | 0 |
| 0 | 0            | 0 | -0.022118975 | 0 | -0.13850615  | 0 | 0            | 0 |
| 0 | 0            | 0 | -0.13842289  | 0 | 0            | 0 | 0            | 0 |
| 0 | 0            | 0 | 0            | 0 | -0.15992601  | 0 | 0.004155403  | 0 |
| 0 | -0.007571247 | 0 | -0.022682071 | 0 | -0.13650147  | 0 | 0            | 0 |
| 0 | 0            | 0 | 0            | 0 | -0.16000413  | 0 | 0            | 0 |
| 0 | 0            | 0 | -0.12268023  | 0 | 0            | 0 | 0            | 0 |
| 0 | -0.008053117 | 0 | 0            | 0 | -0.15840547  | 0 | 0            | 0 |
| 0 | -0.007221816 | 0 | 0            | 0 | -0.15843006  | 0 | 0.001085215  | 0 |
| 0 | 0            | 0 | -0.022228114 | 0 | -0.13623812  | 0 | 0.002356246  | 0 |
| 0 | 0            | 0 | -0.022749781 | 0 | -0.13581718  | 0 | 0            | 0 |
| 0 | 0            | 0 | -0.022607968 | 0 | -0.13603575  | 0 | 0            | 0 |
| 0 | 0            | 0 | 0.007511032  | 0 | -0.13301826  | 0 | 0            | 0 |
| 0 | 0            | 0 | 0            | 0 | -0.15773686  | 0 | 0.002600938  | 0 |
| 0 | 0            | 0 | 0            | 0 | -0.1577482   | 0 | 0.002690595  | 0 |
| 0 | 0            | 0 | 0            | 0 | -0.15794071  | 0 | 0            | 0 |
| 0 | 0            | 0 | 0            | 0 | -0.11991514  | 0 | 0            | 0 |
| 0 | 0            | 0 | 0            | 0 | -0.15286903  | 0 | 0            | 0 |
| 0 | 0            | 0 | 0            | 0 | -0.15085517  | 0 | -0.002004636 | 0 |
| 0 | 0            | 0 | -0.00812177  | 0 | -0.14251798  | 0 | 0            | 0 |
| 0 | 0            | 0 | 0            | 0 | -0.15046615  | 0 | 0            | 0 |
| 0 | 0            | 0 | -0.15981967  | 0 | 0            | 0 | 0            | 0 |
| 0 | 0            | 0 | -0.12920811  | 0 | 0            | 0 | 0            | 0 |
| 0 | 0            | 0 | -0.15439881  | 0 | 0            | 0 | 0.008128953  | 0 |
| 0 | -0.06852774  | 0 | -0.14883466  | 0 | 0            | 0 | 0            | 0 |
| 0 | -0.070794064 | 0 | -0.14765143  | 0 | 0            | 0 | 0            | 0 |
| 0 | -0.070072125 | 0 | -0.14827136  | 0 | 0            | 0 | -0.002492031 | 0 |
| 0 | -1.1045258   | 0 | 0            | 0 | -0.096386545 | 0 | 0            | 0 |
| 0 | 0            | 0 | -0.15532674  | 0 | 0            | 0 | 0            | 0 |
| 0 | 0            | 0 | -0.15484344  | 0 | 0            | 0 | 0            | 0 |
| 0 | 0            | 0 | -0.12256288  | 0 | 0            | 0 | 0            | 0 |

|   |              |   |              |   |              |   |              |
|---|--------------|---|--------------|---|--------------|---|--------------|
| 0 | 0            | 0 | -0.12036093  | 0 | 0            | 0 | 0            |
| 0 | -1.1026887   | 0 | 0            | 0 | -0.095069085 | 0 | -0.015730883 |
| 0 | 0            | 0 | -0.11633771  | 0 | 0            | 0 | 0            |
| 0 | 0            | 0 | -0.11951892  | 0 | 0            | 0 | -0.01585888  |
| 0 | 0            | 0 | 0            | 0 | -0.11357237  | 0 | 0            |
| 0 | 0            | 0 | 0            | 0 | -0.13496406  | 0 | 0            |
| 0 | 0            | 0 | -0.15474453  | 0 | 0            | 0 | 0            |
| 0 | -1.1054734   | 0 | -0.00379524  | 0 | -0.091774428 | 0 | 0            |
| 0 | -0.006818227 | 0 | -0.15465924  | 0 | 0            | 0 | 0            |
| 0 | -0.007804297 | 0 | -0.15318286  | 0 | 0            | 0 | 0            |
| 0 | 0            | 0 | -0.15411117  | 0 | 0            | 0 | 0.002823019  |
| 0 | -0.006786427 | 0 | -0.15332085  | 0 | 0            | 0 | 0.000333718  |
| 0 | 0            | 0 | -0.15415108  | 0 | 0            | 0 | 0            |
| 0 | 0            | 0 | 0            | 0 | -0.11335193  | 0 | 0.00343674   |
| 0 | 0            | 0 | 0            | 0 | -0.14458112  | 0 | 0            |
| 0 | 0            | 0 | -0.004342787 | 0 | -0.10877571  | 0 | 0            |
| 0 | 0            | 0 | -0.1525692   | 0 | 0            | 0 | 0.001863204  |
| 0 | 0            | 0 | -0.15271869  | 0 | 0            | 0 | 0            |
| 0 | 0            | 0 | -0.15264281  | 0 | 0            | 0 | 0.001946707  |
| 0 | -1.1083078   | 0 | 0            | 0 | -0.12797098  | 0 | 0.014739644  |
| 0 | -1.1058502   | 0 | 0            | 0 | -0.14091208  | 0 | 0            |
| 0 | 0            | 0 | -0.007602461 | 0 | -0.13605802  | 0 | 0            |
| 0 | 0            | 0 | 0            | 0 | -0.14346284  | 0 | 0.000474587  |
| 0 | -1.1039485   | 0 | -0.093308954 | 0 | 0            | 0 | 0            |
| 0 | -1.1020314   | 0 | -0.09234645  | 0 | 0            | 0 | -0.016505468 |
| 0 | 0            | 0 | -0.14610923  | 0 | 0            | 0 | 0            |
| 0 | -1.1069311   | 0 | -0.036981116 | 0 | -0.096555734 | 0 | 0            |
| 0 | 0            | 0 | -0.14492792  | 0 | 0            | 0 | -0.002799106 |
| 0 | 0            | 0 | -0.14429339  | 0 | 0            | 0 | 0            |
| 0 | -1.1135366   | 0 | 0            | 0 | -0.12901153  | 0 | 0            |
| 0 | 0            | 0 | 0            | 0 | -0.1327083   | 0 | -0.006019221 |
| 0 | 0            | 0 | 0            | 0 | -0.1334232   | 0 | 0            |
| 0 | 0            | 0 | -0.004511296 | 0 | -0.1286645   | 0 | 0            |
| 0 | 0            | 0 | 0            | 0 | -0.13804234  | 0 | -0.00313017  |
| 0 | 0            | 0 | -0.006282326 | 0 | -0.13124959  | 0 | 0            |
| 0 | 0            | 0 | -0.007685723 | 0 | -0.1301816   | 0 | -0.003227841 |
| 0 | 0            | 0 | 0            | 0 | -0.13347061  | 0 | 0            |
| 0 | 0            | 0 | -0.10965504  | 0 | 0            | 0 | 0            |
| 0 | 0            | 0 | 0            | 0 | -0.11939611  | 0 | 0            |
| 0 | -0.012619513 | 0 | 0            | 0 | -0.14350409  | 0 | 0            |
| 0 | -1.1078847   | 0 | -0.12540515  | 0 | 0            | 0 | 0.01351975   |
| 0 | -1.1057254   | 0 | -0.13757091  | 0 | 0            | 0 | 0            |
| 0 | -0.021185974 | 0 | 0            | 0 | -0.11688545  | 0 | 0            |
| 0 | 0            | 0 | 0            | 0 | -0.14265067  | 0 | -0.00433314  |
| 0 | 0            | 0 | 0            | 0 | -0.14262544  | 0 | 0            |
| 0 | 0            | 0 | -0.01085269  | 0 | -0.13154219  | 0 | 0            |
| 0 | 0            | 0 | -0.10946881  | 0 | 0            | 0 | 0.001954296  |



|   |              |   |              |   |              |   |              |   |
|---|--------------|---|--------------|---|--------------|---|--------------|---|
| 0 | 0            | 0 | 0            | 0 | -0.11615301  | 0 | 0            | 0 |
| 0 | 0            | 0 | 0            | 0 | -0.13475429  | 0 | -0.011676272 | 0 |
| 0 | -1.112433    | 0 | -0.12665215  | 0 | 0            | 0 | 0            | 0 |
| 0 | -0.010657355 | 0 | 0            | 0 | -0.14138606  | 0 | -0.010091749 | 0 |
| 0 | -1.1089874   | 0 | 0            | 0 | -0.14550584  | 0 | 0            | 0 |
| 0 | 0            | 0 | 0            | 0 | -0.11424841  | 0 | -0.007526889 | 0 |
| 0 | -0.007960361 | 0 | 0            | 0 | -0.13584831  | 0 | 0            | 0 |
| 0 | 0            | 0 | -0.009570323 | 0 | -0.13092631  | 0 | -0.008160523 | 0 |
| 0 | 0            | 0 | 0            | 0 | -0.14052984  | 0 | -0.008482855 | 0 |
| 0 | 0            | 0 | -0.12851616  | 0 | 0            | 0 | 0            | 0 |
| 0 | 0            | 0 | -0.016538838 | 0 | -0.098786446 | 0 | 0            | 0 |
| 0 | -0.007568284 | 0 | -0.007442238 | 0 | -0.13223096  | 0 | 0            | 0 |
| 0 | 0            | 0 | -0.005032859 | 0 | -0.13060806  | 0 | 0            | 0 |
| 0 | 0            | 0 | 0            | 0 | -0.13549182  | 0 | 0            | 0 |
| 0 | 0            | 0 | -0.007355688 | 0 | -0.13175753  | 0 | 0            | 0 |
| 0 | 0            | 0 | -0.13894302  | 0 | 0            | 0 | 0            | 0 |
| 0 | -0.02488839  | 0 | 0            | 0 | -0.12011381  | 0 | 0            | 0 |
| 0 | 0            | 0 | -0.13782574  | 0 | 0            | 0 | -0.00078919  | 0 |
| 0 | -0.02055027  | 0 | -0.11396676  | 0 | 0            | 0 | 0            | 0 |
| 0 | -0.01342502  | 0 | 0            | 0 | -0.13411783  | 0 | -0.01563258  | 0 |
| 0 | -0.012670515 | 0 | -0.010812735 | 0 | -0.12369732  | 0 | -0.015860131 | 0 |
| 0 | -0.013022965 | 0 | 0            | 0 | -0.13304543  | 0 | -0.016632445 | 0 |
| 0 | 0            | 0 | -0.12674671  | 0 | 0            | 0 | -0.007490221 | 0 |
| 0 | -1.1717548   | 0 | 0            | 0 | -0.13885395  | 0 | 0            | 0 |
| 0 | 0            | 0 | -0.010275736 | 0 | -0.1231734   | 0 | -0.014403409 | 0 |
| 0 | 0            | 0 | 0            | 0 | -0.13312023  | 0 | -0.014208535 | 0 |
| 0 | 0            | 0 | -0.12718226  | 0 | 0            | 0 | 0            | 0 |
| 0 | 0            | 0 | 0            | 0 | -0.13277441  | 0 | -0.014589042 | 0 |
| 0 | 0            | 0 | -0.010237163 | 0 | -0.1225407   | 0 | -0.013523431 | 0 |
| 0 | 0            | 0 | -0.010063584 | 0 | -0.12290783  | 0 | -0.01355917  | 0 |
| 0 | 0            | 0 | 0            | 0 | -0.13245557  | 0 | -0.013459108 | 0 |
| 0 | 0            | 0 | -0.11324977  | 0 | 0            | 0 | 0            | 0 |
| 0 | 0            | 0 | -0.1333425   | 0 | 0            | 0 | -0.003765296 | 0 |
| 0 | 0            | 0 | -0.12733238  | 0 | 0            | 0 | 0            | 0 |
| 0 | 0            | 0 | -0.11486841  | 0 | 0            | 0 | 0            | 0 |
| 0 | 0            | 0 | 0            | 0 | -0.11917906  | 0 | 0            | 0 |
| 0 | 0            | 0 | -0.11143758  | 0 | 0            | 0 | -0.008528244 | 0 |
| 0 | -1.1087742   | 0 | -0.14124425  | 0 | 0            | 0 | 0            | 0 |
| 0 | -0.008263776 | 0 | 0            | 0 | -0.13335404  | 0 | 0            | 0 |
| 0 | -0.007476832 | 0 | -0.008573662 | 0 | -0.12543693  | 0 | 0            | 0 |
| 0 | -0.008797948 | 0 | -0.00682586  | 0 | -0.12243976  | 0 | 0            | 0 |
| 0 | 0            | 0 | -0.00881757  | 0 | -0.12463146  | 0 | 0            | 0 |
| 0 | 0            | 0 | -0.008602434 | 0 | -0.12506082  | 0 | 0            | 0 |
| 0 | 0            | 0 | 0            | 0 | -0.13316908  | 0 | 0            | 0 |
| 0 | 0            | 0 | 0            | 0 | -0.11666104  | 0 | -0.007794094 | 0 |
| 0 | 0            | 0 | -0.006524624 | 0 | -0.12219525  | 0 | 0            | 0 |
| 0 | -0.0120186   | 0 | -0.13810382  | 0 | 0            | 0 | 0            | 0 |

|   |              |   |              |   |              |   |              |   |
|---|--------------|---|--------------|---|--------------|---|--------------|---|
| 0 | 0            | 0 | -0.004300985 | 0 | -0.11310313  | 0 | 0            | 0 |
| 0 | 0            | 0 | -0.13747101  | 0 | 0            | 0 | -0.005179028 | 0 |
| 0 | 0            | 0 | -0.13723675  | 0 | 0            | 0 | 0            | 0 |
| 0 | 0            | 0 | -0.12863365  | 0 | 0            | 0 | -0.013041792 | 0 |
| 0 | -0.010265361 | 0 | -0.13611989  | 0 | 0            | 0 | -0.010842182 | 0 |
| 0 | -0.007416874 | 0 | -0.12960485  | 0 | 0            | 0 | 0            | 0 |
| 0 | 0            | 0 | -0.13526622  | 0 | 0            | 0 | -0.009225608 | 0 |
| 0 | 0            | 0 | -0.12926889  | 0 | 0            | 0 | 0            | 0 |
| 0 | -0.023859773 | 0 | -0.11577953  | 0 | 0            | 0 | 0            | 0 |
| 0 | -0.013133653 | 0 | -0.1301005   | 0 | 0            | 0 | -0.015576635 | 0 |
| 0 | -1.1700077   | 0 | -0.13428215  | 0 | 0            | 0 | 0            | 0 |
| 0 | -0.012934875 | 0 | -0.12745397  | 0 | 0            | 0 | -0.017806698 | 0 |
| 0 | 0            | 0 | -0.11487705  | 0 | 0            | 0 | 0            | 0 |
| 0 | -0.090369938 | 0 | 0            | 0 | -0.15243259  | 0 | 0.025130108  | 0 |
| 0 | 0            | 0 | -0.12909858  | 0 | 0            | 0 | -0.014144098 | 0 |
| 0 | 0            | 0 | -0.12718448  | 0 | 0            | 0 | -0.015761312 | 0 |
| 0 | 0            | 0 | -0.12670325  | 0 | 0            | 0 | -0.014605777 | 0 |
| 0 | 0            | 0 | 0            | 0 | -0.11083242  | 0 | -0.00358683  | 0 |
| 0 | 0            | 0 | -0.11253342  | 0 | 0            | 0 | -0.009071861 | 0 |
| 0 | 0            | 0 | -0.002803374 | 0 | -0.10840756  | 0 | 0            | 0 |
| 0 | -1.1194277   | 0 | 0            | 0 | -0.15466175  | 0 | 0.06356623   | 0 |
| 0 | -0.008193598 | 0 | -0.12750411  | 0 | 0            | 0 | 0            | 0 |
| 0 | 0            | 0 | -0.12731433  | 0 | 0            | 0 | 0            | 0 |
| 0 | 0            | 0 | 0.004898718  | 0 | -0.11094755  | 0 | 0            | 0 |
| 0 | 0            | 0 | 0            | 0 | -0.10610436  | 0 | -0.000886247 | 0 |
| 0 | -0.096326293 | 0 | 0            | 0 | -0.15059898  | 0 | 0            | 0 |
| 0 | 0            | 0 | -0.10702186  | 0 | 0            | 0 | -0.005009396 | 0 |
| 0 | -0.013269823 | 0 | 0            | 0 | -0.10256539  | 0 | 0            | 0 |
| 0 | -0.092165666 | 0 | -0.036497488 | 0 | -0.12195122  | 0 | 0            | 0 |
| 0 | 0            | 0 | 0.001877211  | 0 | -0.10708146  | 0 | -0.002188144 | 0 |
| 0 | 0            | 0 | 0            | 0 | -0.1011588   | 0 | -0.008141203 | 0 |
| 0 | -0.094432018 | 0 | 0            | 0 | -0.15582007  | 0 | 0            | 0 |
| 0 | 0            | 0 | 0            | 0 | -0.10206755  | 0 | 0            | 0 |
| 0 | 0            | 0 | -0.006061059 | 0 | -0.095788215 | 0 | 0            | 0 |
| 0 | -0.017339058 | 0 | 0            | 0 | -0.10128162  | 0 | -0.01356007  | 0 |
| 0 | 0            | 0 | 0            | 0 | -0.1489947   | 0 | 0.025381461  | 0 |
| 0 | -0.085886795 | 0 | -0.14739372  | 0 | 0            | 0 | 0.023148211  | 0 |
| 0 | -1.1189004   | 0 | -0.14984292  | 0 | 0            | 0 | 0.06144507   | 0 |
| 0 | 0            | 0 | 0            | 0 | -0.10085829  | 0 | -0.011683728 | 0 |
| 0 | -0.012892992 | 0 | -0.008879548 | 0 | -0.093177743 | 0 | 0            | 0 |
| 0 | 0            | 0 | -0.009765642 | 0 | -0.090893707 | 0 | -0.009462916 | 0 |
| 0 | 0            | 0 | -0.008857402 | 0 | -0.092707171 | 0 | 0            | 0 |
| 0 | 0            | 0 | -0.10192725  | 0 | 0            | 0 | -0.00238032  | 0 |
| 0 | -0.012739642 | 0 | -0.099592814 | 0 | 0            | 0 | 0            | 0 |
| 0 | 0            | 0 | -0.098268675 | 0 | 0            | 0 | -0.009121547 | 0 |
| 0 | -0.091472127 | 0 | -0.14602699  | 0 | 0            | 0 | 0            | 0 |
| 0 | -0.017135578 | 0 | -0.098621896 | 0 | 0            | 0 | -0.014393732 | 0 |

|   |              |   |              |   |              |   |              |
|---|--------------|---|--------------|---|--------------|---|--------------|
| 0 | 0            | 0 | -0.099112216 | 0 | 0            | 0 | 0            |
| 0 | 0            | 0 | 0            | 0 | -0.14777945  | 0 | 0            |
| 0 | 0            | 0 | -0.098199768 | 0 | 0            | 0 | -0.012514482 |
| 0 | -0.024342541 | 0 | 0            | 0 | -0.10674198  | 0 | -0.0191915   |
| 0 | -0.090097495 | 0 | -0.15078896  | 0 | 0            | 0 | 0            |
| 0 | 0            | 0 | -0.036461833 | 0 | -0.11861277  | 0 | 0            |
| 0 | 0            | 0 | 0            | 0 | -0.10602323  | 0 | -0.017185771 |
| 0 | 0            | 0 | 0            | 0 | -0.15304543  | 0 | 0            |
| 0 | 0            | 0 | -0.14408854  | 0 | 0            | 0 | 0.023442725  |
| 0 | -0.017960997 | 0 | -0.009231348 | 0 | -0.098229365 | 0 | 0            |
| 0 | 0            | 0 | -0.010376398 | 0 | -0.094727232 | 0 | -0.013488196 |
| 0 | 0            | 0 | -0.009098119 | 0 | -0.097599838 | 0 | 0            |
| 0 | -0.024022511 | 0 | -0.10380938  | 0 | 0            | 0 | -0.020047689 |
| 0 | 0            | 0 | -0.10309236  | 0 | 0            | 0 | -0.018036884 |
| 0 | 0            | 0 | -0.14337513  | 0 | 0            | 0 | 0            |
| 0 | 0            | 0 | -0.14817     | 0 | 0            | 0 | 0            |
| 0 | -0.10505522  | 0 | 0            | 0 | -0.14459713  | 0 | 0.031501128  |
| 0 | 0            | 0 | 0            | 0 | -0.1378506   | 0 | 0.031289328  |
| 0 | 0            | 0 | -0.023816955 | 0 | -0.10896401  | 0 | 0.026320003  |
| 0 | 0            | 0 | 0            | 0 | -0.133919    | 0 | 0.028759445  |
| 0 | -0.1134709   | 0 | 0            | 0 | -0.13942218  | 0 | 0            |
| 0 | -1.0130935   | 0 | 0            | 0 | 0            | 0 | 0            |
| 0 | 0            | 0 | -0.13383655  | 0 | 0            | 0 | 0.028958519  |
| 0 | -0.016724034 | 0 | 0            | 0 | -0.094350989 | 0 | -0.017413586 |
| 0 | -0.018089538 | 0 | 0            | 0 | -0.13755706  | 0 | 0.021677048  |
| 0 | -0.10095028  | 0 | -0.13964681  | 0 | 0            | 0 | 0.029209386  |
| 0 | 0            | 0 | -0.13064343  | 0 | 0            | 0 | 0.026989388  |
| 0 | 0            | 0 | 0            | 0 | -0.09389517  | 0 | -0.015387536 |
| 0 | 0            | 0 | 0            | 0 | -0.13645271  | 0 | 0.023161938  |
| 0 | 0            | 0 | -0.029916656 | 0 | -0.10605277  | 0 | 0.024295537  |
| 0 | 0            | 0 | -0.000934173 | 0 | -0.092574204 | 0 | -0.01339989  |
| 0 | 0            | 0 | 0            | 0 | -0.13533658  | 0 | 0.024944214  |
| 0 | 0            | 0 | 0            | 0 | -0.13517915  | 0 | 0            |
| 0 | -0.010971292 | 0 | 0.000734308  | 0 | -0.095540369 | 0 | 0            |
| 0 | 0            | 0 | 0            | 0 | -0.14144545  | 0 | 0.032536539  |
| 0 | -0.10890453  | 0 | -0.13493149  | 0 | 0            | 0 | 0            |
| 0 | 0            | 0 | -0.031451295 | 0 | -0.10218161  | 0 | 0            |
| 0 | -0.016789748 | 0 | -0.004342714 | 0 | -0.089212596 | 0 | -0.018866787 |
| 0 | -0.10189697  | 0 | 0            | 0 | -0.14279705  | 0 | 0.034038933  |
| 0 | 0            | 0 | 0.000707968  | 0 | -0.095010479 | 0 | 0            |
| 0 | -0.11281621  | 0 | -0.03533131  | 0 | -0.1122769   | 0 | 0            |
| 0 | 0            | 0 | -0.03808714  | 0 | -0.10238043  | 0 | 0            |
| 0 | -1.0641661   | 0 | 0            | 0 | 0            | 0 | 0            |
| 0 | 0            | 0 | -0.004124829 | 0 | -0.08896729  | 0 | -0.016840344 |
| 0 | -0.024669824 | 0 | 0            | 0 | -0.13657569  | 0 | 0            |
| 0 | -0.016503623 | 0 | -0.091354344 | 0 | 0            | 0 | -0.018274008 |
| 0 | -0.025142908 | 0 | -0.039665297 | 0 | -0.10136226  | 0 | 0            |

|   |              |   |              |   |              |              |              |
|---|--------------|---|--------------|---|--------------|--------------|--------------|
| 0 | -0.017781775 | 0 | -0.13400493  | 0 | 0            | 0.019717794  | 0            |
| 0 | -1.1479393   | 0 | 0            | 0 | -0.10565555  | 0            | 0            |
| 0 | -1.0597695   | 0 | 0            | 0 | 0            | -0.017565125 | 0            |
| 0 | -0.01745762  | 0 | -0.029610599 | 0 | -0.098447745 | 0            | 0.012112249  |
| 0 | 0            | 0 | -0.090900481 | 0 | 0            | 0            | -0.016245154 |
| 0 | -0.016752626 | 0 | 0            | 0 | -0.12995328  | 0            | 0.015962842  |
| 0 | 0            | 0 | 0            | 0 | -0.13641716  | 0            | 0            |
| 0 | 0            | 0 | 0            | 0 | -0.13558691  | 0            | 0            |
| 0 | -1.1190173   | 0 | 0            | 0 | -0.11160247  | 0            | 0.030193207  |
| 0 | 0            | 0 | -0.03960783  | 0 | -0.1004868   | 0            | 0            |
| 0 | -1.0619016   | 0 | 0            | 0 | 0            | 0            | 0            |
| 0 | 0            | 0 | -0.1329059   | 0 | 0            | 0            | 0.021220256  |
| 0 | 0            | 0 | -0.031061629 | 0 | -0.098217362 | 0            | 0.019150558  |
| 0 | 0            | 0 | -0.02897537  | 0 | -0.098034588 | 0            | 0.013674873  |
| 0 | 0            | 0 | 0            | 0 | -0.12912429  | 0            | 0.017750283  |
| 0 | 0            | 0 | -0.13204947  | 0 | 0            | 0            | 0            |
| 0 | 0            | 0 | -0.13205235  | 0 | 0            | 0            | 0.023233007  |
| 0 | 0            | 0 | -0.034686739 | 0 | -0.099937362 | 0            | 0            |
| 0 | -0.022110149 | 0 | -0.034921515 | 0 | -0.096603663 | 0            | 0            |
| 0 | -1.062669    | 0 | 0            | 0 | 0            | 0            | 0            |
| 0 | -1.1461149   | 0 | -0.10395543  | 0 | 0            | 0            | 0            |
| 0 | -0.023833508 | 0 | -0.13358221  | 0 | 0            | 0            | 0            |
| 0 | -1.1185399   | 0 | -0.10965919  | 0 | 0            | 0            | 0.028426647  |
| 0 | 0            | 0 | -0.034794164 | 0 | -0.095955247 | 0            | 0            |
| 0 | 0            | 0 | -0.13663017  | 0 | 0            | 0            | 0.030297809  |
| 0 | -1.1595888   | 0 | 0            | 0 | -0.10853201  | 0            | 0.028265939  |
| 0 | -0.016526447 | 0 | -0.127506    | 0 | 0            | 0            | 0.014808503  |
| 0 | 0            | 0 | -0.13262407  | 0 | 0            | 0            | 0            |
| 0 | -0.097311966 | 0 | -0.1376346   | 0 | 0            | 0            | 0.032474287  |
| 0 | 0            | 0 | -0.12667512  | 0 | 0            | 0            | 0.016601017  |
| 0 | 0            | 0 | 0            | 0 | -0.13976204  | 0            | 0.035473274  |
| 0 | 0            | 0 | -0.13209604  | 0 | 0            | 0            | 0            |
| 0 | -1.1586915   | 0 | -0.10638238  | 0 | 0            | 0            | 0.027206175  |
| 0 | 0            | 0 | -0.035705906 | 0 | -0.10885114  | 0            | 0            |
| 0 | -0.10990372  | 0 | -0.020418178 | 0 | -0.1218649   | 0            | 0            |
| 0 | -1.0177344   | 0 | 0            | 0 | 0            | 0            | 0            |
| 0 | -1.1166578   | 0 | -0.044415793 | 0 | -0.070887693 | 0            | 0            |
| 0 | -1.0212565   | 0 | 0            | 0 | 0            | 0            | -0.015330102 |
| 0 | -1.0194598   | 0 | 0            | 0 | 0            | 0            | 0            |
| 0 | -1.0217696   | 0 | 0            | 0 | 0            | 0            | 0            |
| 0 | -1.1748185   | 0 | -0.027658883 | 0 | -0.081398846 | 0            | 0            |
| 0 | -1.0652675   | 0 | 0            | 0 | 0            | 0            | 0            |
| 0 | -0.091676337 | 0 | -0.028750834 | 0 | -0.12847537  | 0            | 0.062622915  |
| 0 | 0            | 0 | -0.13474769  | 0 | 0            | 0            | 0.033934678  |
| 0 | -1.0667133   | 0 | 0            | 0 | 0            | 0            | -0.018481349 |
| 0 | -1.0669035   | 0 | 0            | 0 | 0            | 0            | -0.017978916 |
| 0 | -1.0688789   | 0 | 0            | 0 | 0            | 0            | -0.017155672 |

|   |              |   |              |   |              |   |              |
|---|--------------|---|--------------|---|--------------|---|--------------|
| 0 | -1.06876     | 0 | 0            | 0 | 0            | 0 | 0            |
| 0 | 0            | 0 | -0.021070962 | 0 | -0.11811602  | 0 | 0            |
| 0 | -1.0695648   | 0 | 0            | 0 | 0            | 0 | 0            |
| 0 | 0            | 0 | 0            | 0 | -0.12037298  | 0 | 0.033675067  |
| 0 | 0            | 0 | -0.023126279 | 0 | -0.10104511  | 0 | 0.038485264  |
| 0 | -1.1260924   | 0 | -0.037694695 | 0 | -0.086383457 | 0 | 0.057982781  |
| 0 | 0            | 0 | -0.02859301  | 0 | -0.12516021  | 0 | 0.062959988  |
| 0 | 0            | 0 | -0.11710443  | 0 | 0            | 0 | 0.031802178  |
| 0 | -0.090168706 | 0 | 0            | 0 | 0            | 0 | 0            |
| 0 | 0            | 0 | -0.016500946 | 0 | -0.10717326  | 0 | 0.041700921  |
| 0 | 0            | 0 | -0.025844451 | 0 | -0.092020862 | 0 | 0            |
| 0 | -0.067800225 | 0 | 0            | 0 | 0            | 0 | -0.016668518 |
| 0 | -0.06226963  | 0 | 0            | 0 | 0            | 0 | 0            |
| 0 | -0.062681651 | 0 | 0            | 0 | 0            | 0 | 0            |
| 0 | 0            | 0 | 0            | 0 | 0            | 0 | 0            |
| 0 | 0            | 0 | 0            | 0 | 0            | 0 | -0.014987031 |
| 0 | -1.1212442   | 0 | -0.081041607 | 0 | -0.099622633 | 0 | 0            |
| 0 | 0            | 0 | 0            | 0 | 0            | 0 | 0            |
| 0 | -0.096810612 | 0 | 0            | 0 | 0            | 0 | -0.020422433 |
| 0 | 0            | 0 | 0            | 0 | 0            | 0 | 0            |
| 0 | -0.094808611 | 0 | 0            | 0 | 0            | 0 | 0            |
| 0 | -0.08909022  | 0 | 0            | 0 | 0            | 0 | 0            |
| 0 | 0            | 0 | 0            | 0 | 0            | 0 | 0            |
| 0 | -0.06830998  | 0 | 0            | 0 | 0            | 0 | -0.019369769 |
| 0 | -0.069582924 | 0 | 0            | 0 | 0            | 0 | -0.020225115 |
| 0 | 0            | 0 | 0            | 0 | 0            | 0 | -0.007126694 |
| 0 | 0            | 0 | 0            | 0 | 0            | 0 | 0            |
| 0 | 0            | 0 | 0            | 0 | 0            | 0 | -0.008482753 |
| 0 | 0            | 0 | 0            | 0 | 0            | 0 | 0            |
| 0 | -0.059167701 | 0 | 0            | 0 | 0            | 0 | 0            |
| 0 | 0            | 0 | 0            | 0 | 0            | 0 | 0            |
| 0 | 0            | 0 | 0            | 0 | 0            | 0 | -0.01871749  |
| 0 | 0            | 0 | 0            | 0 | 0            | 0 | -0.012010395 |
| 0 | 0            | 0 | 0            | 0 | 0            | 0 | -0.007893168 |
| 0 | -0.00968854  | 0 | 0            | 0 | 0            | 0 | 0            |
| 0 | 0            | 0 | 0            | 0 | 0            | 0 | 0            |
| 0 | 0            | 0 | 0            | 0 | 0            | 0 | 0            |
| 0 | 0            | 0 | 0            | 0 | 0            | 0 | 0            |
| 0 | 0            | 0 | 0            | 0 | 0            | 0 | -0.01761692  |
| 0 | 0            | 0 | 0            | 0 | 0            | 0 | -0.018535932 |
| 0 | 0            | 0 | 0            | 0 | 0            | 0 | 0            |
| 0 | -0.012740319 | 0 | 0            | 0 | 0            | 0 | -0.017681652 |
| 0 | 0            | 0 | 0            | 0 | 0            | 0 | -0.015805759 |
| 0 | 0            | 0 | 0            | 0 | 0            | 0 | -0.014639862 |
| 0 | 0            | 0 | 0            | 0 | 0            | 0 | -0.014237149 |
| 0 | -0.007019893 | 0 | 0            | 0 | 0            | 0 | 0            |
| 0 | 0            | 0 | 0            | 0 | -0.10567221  | 0 | 0.022359908  |

|   |              |   |              |   |              |   |              |   |
|---|--------------|---|--------------|---|--------------|---|--------------|---|
| 0 | 0            | 0 | -0.026490063 | 0 | -0.080420318 | 0 | 0.020480267  | 0 |
| 0 | -0.008516642 | 0 | 0            | 0 | 0            | 0 | -0.017237264 | 0 |
| 0 | 0            | 0 | 0            | 0 | 0            | 0 | 0            | 0 |
| 0 | 0            | 0 | 0            | 0 | 0            | 0 | 0            | 0 |
| 0 | -0.000788658 | 0 | 0            | 0 | -0.10617345  | 0 | 0.020577154  | 0 |
| 0 | -0.009645345 | 0 | 0            | 0 | 0            | 0 | -0.016515134 | 0 |
| 0 | 0            | 0 | 0            | 0 | 0            | 0 | -0.015350461 | 0 |
| 0 | 0            | 0 | 0            | 0 | 0            | 0 | 0            | 0 |
| 0 | -0.002993914 | 0 | 0            | 0 | 0            | 0 | 0            | 0 |
| 0 | 0            | 0 | 0            | 0 | 0            | 0 | -0.014629649 | 0 |
| 0 | 0            | 0 | 0            | 0 | 0            | 0 | -0.011140004 | 0 |
| 0 | 0            | 0 | -0.031565077 | 0 | -0.078934065 | 0 | 0.029148535  | 0 |
| 0 | 0.001445758  | 0 | -0.032230484 | 0 | -0.078958293 | 0 | 0.027705199  | 0 |
| 0 | 0            | 0 | -0.10376554  | 0 | 0            | 0 | 0.021096776  | 0 |
| 0 | -0.000818551 | 0 | -0.10427966  | 0 | 0            | 0 | 0.019313903  | 0 |
| 0 | -1.0898177   | 0 | 0            | 0 | 0            | 0 | 0            | 0 |
| 0 | -0.007132651 | 0 | -0.030310092 | 0 | -0.076148811 | 0 | 0            | 0 |
| 0 | 0            | 0 | -0.030221848 | 0 | -0.075670854 | 0 | 0            | 0 |
| 0 | 0            | 0 | 0            | 0 | 0            | 0 | -0.010603352 | 0 |
| 0 | -0.014617446 | 0 | 0            | 0 | 0            | 0 | -0.019187608 | 0 |
| 0 | 0            | 0 | 0            | 0 | 0            | 0 | -0.014844176 | 0 |
| 0 | 0            | 0 | 0            | 0 | 0            | 0 | -0.011494307 | 0 |
| 0 | -1.0657182   | 0 | 0            | 0 | 0            | 0 | 0.014353683  | 0 |
| 0 | -1.0949341   | 0 | 0            | 0 | 0            | 0 | 0.012078206  | 0 |
| 0 | -0.013006155 | 0 | 0            | 0 | 0            | 0 | 0            | 0 |
| 0 | 0            | 0 | 0            | 0 | 0            | 0 | -0.017238195 | 0 |
| 0 | -1.0986287   | 0 | 0            | 0 | 0            | 0 | 0            | 0 |
| 0 | 0            | 0 | 0            | 0 | 0            | 0 | 0            | 0 |
| 0 | -1.0641871   | 0 | 0            | 0 | 0            | 0 | 0            | 0 |
| 0 | -1.1003066   | 0 | 0            | 0 | 0            | 0 | 0            | 0 |
| 0 | -1.0628579   | 0 | 0            | 0 | 0            | 0 | 0            | 0 |
| 0 | 0            | 0 | -0.023265431 | 0 | -0.085632414 | 0 | 0.031061985  | 0 |
| 0 | 0.002330049  | 0 | -0.023653037 | 0 | -0.0858164   | 0 | 0.029406602  | 0 |
| 0 | -1.0636003   | 0 | 0            | 0 | 0            | 0 | 0.023948523  | 0 |
| 0 | -1.0645061   | 0 | 0            | 0 | 0            | 0 | 0.021857963  | 0 |
| 0 | -0.012392918 | 0 | 0            | 0 | 0            | 0 | -0.021455075 | 0 |
| 0 | -0.008346797 | 0 | 0            | 0 | 0            | 0 | -0.019854926 | 0 |
| 0 | 0            | 0 | 0            | 0 | 0            | 0 | -0.017851699 | 0 |
| 0 | 0            | 0 | 0            | 0 | 0            | 0 | -0.019417579 | 0 |
| 0 | -1.0603674   | 0 | 0            | 0 | 0            | 0 | 0            | 0 |
| 0 | -1.1194374   | 0 | 0            | 0 | 0            | 0 | 0.018748995  | 0 |
| 0 | -1.1312242   | 0 | 0            | 0 | 0            | 0 | 0            | 0 |
| 0 | -1.1324253   | 0 | 0            | 0 | 0            | 0 | 0            | 0 |
| 0 | -1.123364    | 0 | 0            | 0 | 0            | 0 | 0            | 0 |
| 0 | -1.1511682   | 0 | 0            | 0 | 0            | 0 | 0.028978016  | 0 |
| 0 | -1.1311766   | 0 | 0            | 0 | 0            | 0 | 0.017369935  | 0 |
| 0 | -1.0733035   | 0 | 0            | 0 | 0            | 0 | 0.035561041  | 0 |

|   |              |   |             |   |             |   |              |   |
|---|--------------|---|-------------|---|-------------|---|--------------|---|
| 0 | -1.0700312   | 0 | 0           | 0 | 0           | 0 | 0.047052594  | 0 |
| 0 | -1.0759498   | 0 | 0           | 0 | 0           | 0 | 0.040150892  | 0 |
| 0 | -1.0668891   | 0 | 0           | 0 | 0           | 0 | 0            | 0 |
| 0 | 0            | 0 | 0           | 0 | 0           | 0 | 0.010555288  | 0 |
| 0 | -0.014940789 | 0 | 0           | 0 | 0           | 0 | 0            | 0 |
| 0 | 0            | 0 | 0           | 0 | 0           | 0 | 0            | 0 |
| 0 | 0            | 0 | 0           | 0 | 0           | 0 | 0.009570798  | 0 |
| 0 | 0            | 0 | 0           | 0 | 0           | 0 | 0            | 0 |
| 0 | 0            | 0 | 0           | 0 | 0           | 0 | 0            | 0 |
| 0 | 0            | 0 | 0           | 0 | 0           | 0 | 0.012969833  | 0 |
| 0 | 0            | 0 | 0           | 0 | 0           | 0 | 0.011817706  | 0 |
| 0 | 0            | 0 | 0           | 0 | 0           | 0 | 0.014492462  | 0 |
| 0 | 0.007179105  | 0 | 0           | 0 | 0           | 0 | 0.007848851  | 0 |
| 0 | -0.004345474 | 0 | 0           | 0 | 0           | 0 | 0.014534713  | 0 |
| 0 | 0            | 0 | 0           | 0 | 0           | 0 | 0.005995528  | 0 |
| 0 | 0.005876063  | 0 | 0           | 0 | 0           | 0 | 0            | 0 |
| 0 | 0            | 0 | 0           | 0 | 0           | 0 | 0            | 0 |
| 0 | -0.005833659 | 0 | 0           | 0 | 0           | 0 | 0            | 0 |
| 0 | 0.009973655  | 0 | 0           | 0 | 0           | 0 | 0.010578297  | 0 |
| 0 | 0            | 0 | 0           | 0 | 0           | 0 | 0.013867795  | 0 |
| 0 | 0            | 0 | 0           | 0 | 0           | 0 | 0.014184852  | 0 |
| 0 | 0            | 0 | 0           | 0 | 0           | 0 | 0.014441524  | 0 |
| 0 | -0.003480966 | 0 | 0           | 0 | 0           | 0 | 0.014045728  | 0 |
| 0 | 0.006873307  | 0 | 0           | 0 | 0           | 0 | 0.012261269  | 0 |
| 0 | 0            | 0 | 0           | 0 | 0           | 0 | 0            | 0 |
| 0 | -0.006432353 | 0 | 0           | 0 | 0           | 0 | 0            | 0 |
| 0 | 0            | 0 | 0           | 0 | 0           | 0 | 0.020985937  | 0 |
| 0 | 0.010578091  | 0 | 0           | 0 | 0           | 0 | 0.021808792  | 0 |
| 0 | -0.040024933 | 0 | 0           | 0 | 0           | 0 | 0            | 0 |
| 0 | -0.026926383 | 0 | 0           | 0 | 0           | 0 | 0.022068188  | 0 |
| 0 | 0            | 0 | 0           | 0 | 0           | 0 | 0.021810156  | 0 |
| 0 | -0.044566511 | 0 | 0           | 0 | 0           | 0 | 0.018859573  | 0 |
| 0 | 0            | 0 | 0           | 0 | 0           | 0 | 0.023188275  | 0 |
| 0 | 0            | 0 | 0           | 0 | 0           | 0 | 0            | 0 |
| 0 | 0            | 0 | 0           | 0 | 0           | 0 | 0.019260291  | 0 |
| 0 | 0            | 0 | 0           | 0 | 0           | 0 | 0.020476136  | 0 |
| 0 | 0.000611637  | 0 | 0           | 0 | 0           | 0 | 0.017503397  | 0 |
| 0 | -0.022123284 | 0 | 0           | 0 | 0           | 0 | 0.035953861  | 0 |
| 0 | 0            | 0 | 0           | 0 | 0           | 0 | 0.036705894  | 0 |
| 0 | -1.0230184   | 0 | 0           | 0 | -0.13528468 | 0 | 0            | 0 |
| 0 | -1.0230037   | 0 | -0.12950534 | 0 | 0           | 0 | 0            | 0 |
| 0 | -1.0674546   | 0 | 0           | 0 | -0.16481848 | 0 | 0            | 0 |
| 0 | -1.098465    | 0 | 0           | 0 | -0.13799299 | 0 | 0            | 0 |
| 0 | -1.0966682   | 0 | 0           | 0 | -0.12826459 | 0 | 0            | 0 |
| 0 | -1.0971413   | 0 | 0           | 0 | -0.13005576 | 0 | 0            | 0 |
| 0 | -1.0273812   | 0 | 0           | 0 | -0.14455451 | 0 | 0            | 0 |
| 0 | -1.0950944   | 0 | 0           | 0 | -0.12710656 | 0 | -0.013685724 | 0 |

|   |             |   |              |   |             |   |              |   |
|---|-------------|---|--------------|---|-------------|---|--------------|---|
| 0 | -1.0973517  | 0 | 0.005955968  | 0 | -0.13335414 | 0 | 0            | 0 |
| 0 | -1.1011037  | 0 | 0            | 0 | -0.15452303 | 0 | 0            | 0 |
| 0 | -1.1012126  | 0 | -0.009467877 | 0 | -0.14283932 | 0 | 0            | 0 |
| 0 | -1.100912   | 0 | 0            | 0 | -0.15237377 | 0 | -0.001335711 | 0 |
| 0 | -1.1010795  | 0 | 0            | 0 | -0.15211913 | 0 | 0            | 0 |
| 0 | -1.057737   | 0 | 0            | 0 | -0.15863123 | 0 | 0            | 0 |
| 0 | -1.0536476  | 0 | -0.021902113 | 0 | -0.13484892 | 0 | 0            | 0 |
| 0 | -1.0679824  | 0 | -0.15844277  | 0 | 0           | 0 | 0            | 0 |
| 0 | -1.0534931  | 0 | 0            | 0 | -0.15601548 | 0 | 0.001129777  | 0 |
| 0 | -1.0538245  | 0 | 0            | 0 | -0.15606766 | 0 | 0            | 0 |
| 0 | -1.0978025  | 0 | -0.13122053  | 0 | 0           | 0 | 0            | 0 |
| 0 | -1.0965632  | 0 | -0.12443386  | 0 | 0           | 0 | 0            | 0 |
| 0 | -1.0273175  | 0 | -0.13887319  | 0 | 0           | 0 | 0            | 0 |
| 0 | -1.0960591  | 0 | -0.12222938  | 0 | 0           | 0 | 0            | 0 |
| 0 | -1.0943139  | 0 | -0.12141559  | 0 | 0           | 0 | -0.014809419 | 0 |
| 0 | -1.1006887  | 0 | -0.14777336  | 0 | 0           | 0 | 0            | 0 |
| 0 | -0.10462273 | 0 | 0            | 0 | -0.14741144 | 0 | 0            | 0 |
| 0 | -1.1004064  | 0 | -0.14645558  | 0 | 0           | 0 | -0.002150057 | 0 |
| 0 | -1.1006017  | 0 | -0.14595472  | 0 | 0           | 0 | 0            | 0 |
| 0 | -0.11962113 | 0 | 0            | 0 | -0.14055207 | 0 | 0            | 0 |
| 0 | -0.12505621 | 0 | 0            | 0 | -0.13798574 | 0 | 0            | 0 |
| 0 | -1.0583223  | 0 | -0.15278231  | 0 | 0           | 0 | 0            | 0 |
| 0 | -1.0553028  | 0 | -0.15087509  | 0 | 0           | 0 | 0            | 0 |
| 0 | -1.0552055  | 0 | -0.15094944  | 0 | 0           | 0 | 0.000392406  | 0 |
| 0 | -1.1022101  | 0 | 0            | 0 | -0.14432515 | 0 | 0            | 0 |
| 0 | -0.12831138 | 0 | 0            | 0 | -0.13691754 | 0 | -0.010742033 | 0 |
| 0 | -0.12515449 | 0 | 0.001347558  | 0 | -0.13874007 | 0 | 0            | 0 |
| 0 | -1.1021634  | 0 | 0            | 0 | -0.14215496 | 0 | -0.00773717  | 0 |
| 0 | -1.1028576  | 0 | 0            | 0 | -0.13748768 | 0 | 0            | 0 |
| 0 | -1.1033722  | 0 | -0.008714173 | 0 | -0.13218864 | 0 | 0            | 0 |
| 0 | 0           | 0 | 0            | 0 | -0.14670983 | 0 | 0            | 0 |
| 0 | -1.1017874  | 0 | -0.011456283 | 0 | -0.12358697 | 0 | -0.013714467 | 0 |
| 0 | -1.1015728  | 0 | 0            | 0 | -0.13469973 | 0 | -0.013508824 | 0 |
| 0 | -1.1016683  | 0 | 0            | 0 | -0.13483783 | 0 | -0.013509623 | 0 |
| 0 | -1.098353   | 0 | 0            | 0 | -0.12105796 | 0 | 0            | 0 |
| 0 | -1.104153   | 0 | -0.010094497 | 0 | -0.12564115 | 0 | 0            | 0 |
| 0 | -1.1039261  | 0 | 0            | 0 | -0.13521978 | 0 | 0            | 0 |
| 0 | -0.100898   | 0 | -0.14044893  | 0 | 0           | 0 | 0            | 0 |
| 0 | -1.1036358  | 0 | -0.007857266 | 0 | -0.12269021 | 0 | 0            | 0 |
| 0 | -0.11412052 | 0 | -0.13481874  | 0 | 0           | 0 | 0            | 0 |
| 0 | 0           | 0 | 0            | 0 | -0.13816729 | 0 | 0            | 0 |
| 0 | -1.1017583  | 0 | -0.1389466   | 0 | 0           | 0 | 0            | 0 |
| 0 | -1.0274049  | 0 | 0            | 0 | -0.11668636 | 0 | 0            | 0 |
| 0 | -0.11957593 | 0 | -0.13182249  | 0 | 0           | 0 | 0            | 0 |
| 0 | 0           | 0 | 0            | 0 | -0.13536987 | 0 | 0            | 0 |
| 0 | -0.12333992 | 0 | -0.13103176  | 0 | 0           | 0 | -0.011997843 | 0 |
| 0 | -1.101597   | 0 | -0.13689593  | 0 | 0           | 0 | -0.008499528 | 0 |



|   |              |   |              |   |             |   |              |   |
|---|--------------|---|--------------|---|-------------|---|--------------|---|
| 0 | 0            | 0 | 0            | 0 | -0.1343775  | 0 | -0.009272204 | 0 |
| 0 | -1.102244    | 0 | -0.1312901   | 0 | 0           | 0 | 0            | 0 |
| 0 | 0            | 0 | 0.000803882  | 0 | -0.13559344 | 0 | 0            | 0 |
| 0 | -1.1010642   | 0 | -0.1306863   | 0 | 0           | 0 | -0.013459129 | 0 |
| 0 | -1.0979127   | 0 | -0.11678566  | 0 | 0           | 0 | 0            | 0 |
| 0 | -1.1008774   | 0 | -0.12925354  | 0 | 0           | 0 | -0.014699781 | 0 |
| 0 | -1.0271632   | 0 | -0.113786    | 0 | 0           | 0 | 0            | 0 |
| 0 | -1.1032314   | 0 | -0.12938125  | 0 | 0           | 0 | 0            | 0 |
| 0 | 0            | 0 | -0.13990034  | 0 | 0           | 0 | 0            | 0 |
| 0 | 0            | 0 | -0.13258475  | 0 | 0           | 0 | 0            | 0 |
| 0 | -0.10934712  | 0 | 0            | 0 | -0.13628372 | 0 | 0            | 0 |
| 0 | 0            | 0 | -0.12934354  | 0 | 0           | 0 | 0            | 0 |
| 0 | 0            | 0 | 0            | 0 | -0.14513803 | 0 | 0            | 0 |
| 0 | 0            | 0 | -0.12862052  | 0 | 0           | 0 | -0.010495529 | 0 |
| 0 | -1.1065794   | 0 | 0            | 0 | -0.15054662 | 0 | 0.025813735  | 0 |
| 0 | 0            | 0 | 0            | 0 | -0.1437683  | 0 | 0            | 0 |
| 0 | 0            | 0 | -0.012070517 | 0 | -0.13178119 | 0 | 0            | 0 |
| 0 | 0            | 0 | 0            | 0 | -0.14351452 | 0 | 0            | 0 |
| 0 | 0            | 0 | 0            | 0 | -0.14341748 | 0 | -0.000280818 | 0 |
| 0 | -0.10182698  | 0 | 0            | 0 | -0.13851903 | 0 | 0            | 0 |
| 0 | -1.1238829   | 0 | 0            | 0 | -0.1474522  | 0 | 0            | 0 |
| 0 | -0.10873501  | 0 | 0            | 0 | -0.13621644 | 0 | -0.015939122 | 0 |
| 0 | -0.12547933  | 0 | 0            | 0 | -0.12881943 | 0 | -0.015024505 | 0 |
| 0 | 0            | 0 | 0            | 0 | -0.12846803 | 0 | 0            | 0 |
| 0 | -0.12155286  | 0 | 0            | 0 | -0.13041146 | 0 | -0.016582042 | 0 |
| 0 | -0.058776151 | 0 | 0            | 0 | -0.16797062 | 0 | 0.007791168  | 0 |
| 0 | -0.059351051 | 0 | -0.019302695 | 0 | -0.14957394 | 0 | 0            | 0 |
| 0 | -0.060018526 | 0 | 0            | 0 | -0.16802737 | 0 | 0            | 0 |
| 0 | -0.059590314 | 0 | 0            | 0 | -0.16829569 | 0 | 0            | 0 |
| 0 | -0.1049555   | 0 | 0            | 0 | -0.13634627 | 0 | 0            | 0 |
| 0 | -0.103749    | 0 | 0.004439889  | 0 | -0.14117644 | 0 | 0            | 0 |
| 0 | -0.010296428 | 0 | 0            | 0 | -0.14633148 | 0 | 0            | 0 |
| 0 | -0.12103403  | 0 | 0.010745347  | 0 | -0.13982476 | 0 | 0            | 0 |
| 0 | 0            | 0 | 0            | 0 | -0.1453405  | 0 | -0.005847468 | 0 |
| 0 | 0            | 0 | -0.012661325 | 0 | -0.13357338 | 0 | 0            | 0 |
| 0 | 0            | 0 | 0            | 0 | -0.14596598 | 0 | 0            | 0 |
| 0 | -1.0357725   | 0 | 0            | 0 | -0.10285528 | 0 | 0            | 0 |
| 0 | -0.12595524  | 0 | 0.00624937   | 0 | -0.13418873 | 0 | -0.016259668 | 0 |
| 0 | -0.11670245  | 0 | 0.005129917  | 0 | -0.13590715 | 0 | 0            | 0 |
| 0 | -1.1042063   | 0 | -0.037667569 | 0 | -0.11906878 | 0 | 0            | 0 |
| 0 | 0            | 0 | 0            | 0 | -0.13376786 | 0 | 0            | 0 |
| 0 | -1.106034    | 0 | -0.14563758  | 0 | 0           | 0 | 0.023846708  | 0 |
| 0 | 0            | 0 | -0.13875469  | 0 | 0           | 0 | 0            | 0 |
| 0 | -0.028235108 | 0 | 0            | 0 | -0.13007591 | 0 | 0            | 0 |
| 0 | -1.1038327   | 0 | 0            | 0 | -0.15467535 | 0 | 0            | 0 |
| 0 | -1.1002351   | 0 | 0            | 0 | -0.10804382 | 0 | -0.016104503 | 0 |
| 0 | -0.10417191  | 0 | -0.12988893  | 0 | 0           | 0 | 0            | 0 |

|   |              |   |              |   |              |   |              |   |
|---|--------------|---|--------------|---|--------------|---|--------------|---|
| 0 | -1.0352725   | 0 | 0            | 0 | -0.1016565   | 0 | -0.011429188 | 0 |
| 0 | -0.013417611 | 0 | 0            | 0 | -0.14385062  | 0 | -0.010750524 | 0 |
| 0 | -1.0358016   | 0 | -0.009303663 | 0 | -0.093063776 | 0 | 0            | 0 |
| 0 | 0            | 0 | 0            | 0 | -0.1658018   | 0 | 0.008303398  | 0 |
| 0 | -1.1031786   | 0 | -0.01056654  | 0 | -0.098181582 | 0 | 0            | 0 |
| 0 | 0            | 0 | 0            | 0 | -0.12919252  | 0 | 0            | 0 |
| 0 | -0.011332484 | 0 | 0            | 0 | -0.14384275  | 0 | 0            | 0 |
| 0 | 0            | 0 | -0.13770933  | 0 | 0            | 0 | 0            | 0 |
| 0 | 0            | 0 | -0.019850382 | 0 | -0.14689519  | 0 | 0            | 0 |
| 0 | -0.009874895 | 0 | -0.016062425 | 0 | -0.12896086  | 0 | 0            | 0 |
| 0 | 0            | 0 | 0            | 0 | -0.14360072  | 0 | -0.008870833 | 0 |
| 0 | 0            | 0 | -0.016789122 | 0 | -0.12720483  | 0 | -0.007618869 | 0 |
| 0 | 0            | 0 | 0            | 0 | -0.14297972  | 0 | -0.007415202 | 0 |
| 0 | 0            | 0 | 0            | 0 | -0.1662084   | 0 | 0            | 0 |
| 0 | 0            | 0 | 0            | 0 | -0.16621467  | 0 | 0            | 0 |
| 0 | -1.1220996   | 0 | -0.14295933  | 0 | 0            | 0 | 0            | 0 |
| 0 | 0            | 0 | -0.01657321  | 0 | -0.12748594  | 0 | 0            | 0 |
| 0 | 0            | 0 | 0            | 0 | -0.14361386  | 0 | 0            | 0 |
| 0 | 0            | 0 | -0.13739285  | 0 | 0            | 0 | -0.001898821 | 0 |
| 0 | 0            | 0 | -0.01606368  | 0 | -0.12860017  | 0 | 0            | 0 |
| 0 | 0            | 0 | -0.13736808  | 0 | 0            | 0 | 0            | 0 |
| 0 | 0            | 0 | 0            | 0 | -0.13769584  | 0 | 0            | 0 |
| 0 | -1.035398    | 0 | -0.099904975 | 0 | 0            | 0 | 0            | 0 |
| 0 | 0            | 0 | -0.12409068  | 0 | 0            | 0 | 0            | 0 |
| 0 | -1.099658    | 0 | -0.10513082  | 0 | 0            | 0 | -0.016971186 | 0 |
| 0 | 0            | 0 | -0.011882314 | 0 | -0.11517265  | 0 | 0            | 0 |
| 0 | 0            | 0 | 0            | 0 | -0.12651147  | 0 | -0.001693514 | 0 |
| 0 | -1.03489     | 0 | -0.098998762 | 0 | 0            | 0 | -0.01226611  | 0 |
| 0 | -0.098440175 | 0 | -0.13113991  | 0 | 0            | 0 | 0            | 0 |
| 0 | 0            | 0 | 0            | 0 | -0.13541647  | 0 | -0.01423107  | 0 |
| 0 | -0.10566247  | 0 | -0.12937383  | 0 | 0            | 0 | -0.017185109 | 0 |
| 0 | -0.11666058  | 0 | -0.12471632  | 0 | 0            | 0 | -0.017749842 | 0 |
| 0 | -0.07192441  | 0 | 0            | 0 | -0.156414    | 0 | 0            | 0 |
| 0 | -0.12061483  | 0 | -0.12270982  | 0 | 0            | 0 | -0.016296379 | 0 |
| 0 | -0.072412485 | 0 | -0.008783411 | 0 | -0.147094    | 0 | 0            | 0 |
| 0 | -0.07240728  | 0 | 0            | 0 | -0.1557622   | 0 | -0.000482764 | 0 |
| 0 | -1.1036566   | 0 | -0.14980322  | 0 | 0            | 0 | 0            | 0 |
| 0 | -0.074902797 | 0 | -0.009056797 | 0 | -0.14545838  | 0 | -0.00181218  | 0 |
| 0 | -0.075260109 | 0 | -0.008769458 | 0 | -0.14532829  | 0 | 0            | 0 |
| 0 | -0.075109957 | 0 | 0            | 0 | -0.15424303  | 0 | -0.001664799 | 0 |
| 0 | 0            | 0 | 0            | 0 | -0.16133152  | 0 | 0.01041988   | 0 |
| 0 | 0            | 0 | -0.019498647 | 0 | -0.14094269  | 0 | 0.009265072  | 0 |
| 0 | 0            | 0 | 0            | 0 | -0.13564285  | 0 | 0            | 0 |
| 0 | -0.027176944 | 0 | -0.12585359  | 0 | 0            | 0 | 0            | 0 |
| 0 | 0            | 0 | 0            | 0 | -0.16014108  | 0 | 0.009445647  | 0 |
| 0 | 0            | 0 | 0.002910968  | 0 | -0.13882926  | 0 | 0            | 0 |
| 0 | -0.009723807 | 0 | -0.14013005  | 0 | 0            | 0 | 0            | 0 |

|   |              |   |              |   |             |              |              |
|---|--------------|---|--------------|---|-------------|--------------|--------------|
| 0 | 0            | 0 | -0.13916383  | 0 | 0           | -0.007344045 | 0            |
| 0 | 0            | 0 | -0.020937864 | 0 | -0.14098731 | 0            | 0            |
| 0 | 0            | 0 | -0.020743937 | 0 | -0.1403155  | 0            | 0            |
| 0 | 0            | 0 | -0.13978057  | 0 | 0           | 0            | 0            |
| 0 | 0            | 0 | 0            | 0 | -0.16133301 | 0            | 0            |
| 0 | 0            | 0 | 0            | 0 | -0.12594528 | 0            | -0.013458921 |
| 0 | -0.10197081  | 0 | -0.12926343  | 0 | 0           | 0            | 0            |
| 0 | 0            | 0 | 0            | 0 | -0.12775932 | 0            | -0.015044652 |
| 0 | -0.054355252 | 0 | -0.16146023  | 0 | 0           | 0.006519498  | 0            |
| 0 | -0.056207961 | 0 | -0.16119246  | 0 | 0           | 0            | 0            |
| 0 | -0.055459582 | 0 | -0.1617037   | 0 | 0           | 0            | 0            |
| 0 | 0            | 0 | 0.010203756  | 0 | -0.13635583 | 0            | 0            |
| 0 | 0            | 0 | -0.12499681  | 0 | 0           | 0            | 0            |
| 0 | 0            | 0 | -0.12754127  | 0 | 0           | 0            | 0            |
| 0 | 0            | 0 | 0.004257179  | 0 | -0.13234829 | 0            | 0            |
| 0 | -0.01333505  | 0 | -0.13819147  | 0 | 0           | -0.012051088 | 0            |
| 0 | 0            | 0 | 0.005885529  | 0 | -0.13095338 | 0            | -0.014708826 |
| 0 | -0.011258603 | 0 | -0.1380487   | 0 | 0           | 0            | 0            |
| 0 | 0            | 0 | -0.13720068  | 0 | 0           | -0.008672945 | 0            |
| 0 | 0            | 0 | -0.13793975  | 0 | 0           | -0.01016936  | 0            |
| 0 | -0.009669248 | 0 | 0            | 0 | -0.16128613 | 0            | 0            |
| 0 | 0            | 0 | 0            | 0 | -0.16044487 | 0            | 0.005552231  |
| 0 | 0            | 0 | -0.022952626 | 0 | -0.13817179 | 0            | 0            |
| 0 | -0.007483359 | 0 | -0.022197869 | 0 | -0.13895539 | 0            | 0            |
| 0 | 0            | 0 | -0.13781496  | 0 | 0           | 0            | 0            |
| 0 | -0.006617078 | 0 | 0            | 0 | -0.16041767 | 0            | 0.002757817  |
| 0 | 0            | 0 | -0.02143921  | 0 | -0.13909238 | 0            | 0.003950562  |
| 0 | 0            | 0 | 0            | 0 | -0.1606208  | 0            | 0            |
| 0 | 0            | 0 | -0.022127079 | 0 | -0.13849893 | 0            | 0            |
| 0 | 0            | 0 | 0            | 0 | -0.15982236 | 0            | 0.004443614  |
| 0 | -0.008117796 | 0 | -0.023018365 | 0 | -0.13604311 | 0            | 0            |
| 0 | 0            | 0 | -0.12241871  | 0 | 0           | -0.003083506 | 0            |
| 0 | -0.00730417  | 0 | -0.022538864 | 0 | -0.13656297 | 0            | 0.00087463   |
| 0 | -0.00771623  | 0 | 0            | 0 | -0.15830921 | 0            | 0.00110316   |
| 0 | 0            | 0 | -0.022377759 | 0 | -0.13600608 | 0            | 0.002418111  |
| 0 | 0            | 0 | -0.022201009 | 0 | -0.13620936 | 0            | 0.002483095  |
| 0 | 0            | 0 | -0.022758995 | 0 | -0.13583061 | 0            | 0            |
| 0 | 0            | 0 | 0            | 0 | -0.15769848 | 0            | 0.002698701  |
| 0 | 0            | 0 | 0            | 0 | -0.15363765 | 0            | 0            |
| 0 | 0            | 0 | -0.010468404 | 0 | -0.10978572 | 0            | 0            |
| 0 | 0            | 0 | 0            | 0 | -0.12011512 | 0            | 0.002079132  |
| 0 | 0            | 0 | -0.008448615 | 0 | -0.14458579 | 0            | 0            |
| 0 | 0            | 0 | 0            | 0 | -0.15290508 | 0            | -0.000302372 |
| 0 | 0            | 0 | -0.15940987  | 0 | 0           | 0.00704248   | 0            |
| 0 | 0            | 0 | -0.008714375 | 0 | -0.14232929 | 0            | -0.002135396 |
| 0 | 0            | 0 | 0            | 0 | -0.15083536 | 0            | -0.002001618 |
| 0 | 0            | 0 | -0.008187948 | 0 | -0.14242855 | 0            | 0            |

|   |              |   |              |   |              |              |              |
|---|--------------|---|--------------|---|--------------|--------------|--------------|
| 0 | 0            | 0 | -0.15948369  | 0 | 0            | 0            | 0            |
| 0 | 0            | 0 | -0.15973675  | 0 | 0            | 0            | 0            |
| 0 | 0            | 0 | -0.13047702  | 0 | 0            | 0            | 0            |
| 0 | 0            | 0 | -0.12872311  | 0 | 0            | -0.015460324 | 0            |
| 0 | -1.1083665   | 0 | 0            | 0 | -0.13811372  | 0            | 0.023653576  |
| 0 | -1.1020864   | 0 | 0            | 0 | -0.095984285 | 0            | -0.01432226  |
| 0 | -1.1119924   | 0 | 0            | 0 | -0.14313085  | 0            | 0.032961156  |
| 0 | 0            | 0 | -0.12222209  | 0 | 0            | 0            | -0.01617654  |
| 0 | 0            | 0 | -0.12871087  | 0 | 0            | 0            | 0            |
| 0 | 0            | 0 | -0.1199797   | 0 | 0            | 0            | -0.014690844 |
| 0 | 0            | 0 | -0.15519965  | 0 | 0            | 0            | 0.008682794  |
| 0 | -0.068015809 | 0 | -0.1496951   | 0 | 0            | 0            | 0            |
| 0 | -1.1409773   | 0 | 0            | 0 | -0.13687536  | 0            | 0            |
| 0 | 0            | 0 | -0.15445801  | 0 | 0            | 0            | 0.008121675  |
| 0 | -0.068610246 | 0 | -0.14906899  | 0 | 0            | 0            | -0.001802276 |
| 0 | -0.07065347  | 0 | -0.14812812  | 0 | 0            | 0            | -0.002468659 |
| 0 | -1.1045368   | 0 | -0.000832122 | 0 | -0.095578841 | 0            | 0            |
| 0 | 0            | 0 | 0            | 0 | -0.13363417  | 0            | 0            |
| 0 | 0            | 0 | -0.1553775   | 0 | 0            | 0            | 0            |
| 0 | -1.1027629   | 0 | -0.005501024 | 0 | -0.089731259 | 0            | -0.015768621 |
| 0 | 0            | 0 | -0.11638422  | 0 | 0            | 0            | 0.000544181  |
| 0 | 0            | 0 | 0            | 0 | -0.11406875  | 0            | 0.004605867  |
| 0 | 0            | 0 | -0.001836719 | 0 | -0.11178985  | 0            | 0            |
| 0 | -1.1217699   | 0 | 0            | 0 | -0.13555438  | 0            | 0            |
| 0 | 0            | 0 | 0            | 0 | -0.13469726  | 0            | -0.004519622 |
| 0 | 0            | 0 | -0.001334443 | 0 | -0.1336747   | 0            | 0            |
| 0 | -0.009152513 | 0 | -0.15550756  | 0 | 0            | 0            | 0            |
| 0 | -1.1013727   | 0 | -0.093005006 | 0 | 0            | 0            | -0.015199346 |
| 0 | 0            | 0 | -0.15468165  | 0 | 0            | 0            | 0.004273558  |
| 0 | 0            | 0 | -0.15485075  | 0 | 0            | 0            | 0            |
| 0 | -1.1063228   | 0 | -0.040785849 | 0 | -0.10105194  | 0            | 0            |
| 0 | -0.006363682 | 0 | -0.15458397  | 0 | 0            | 0            | 0.001474617  |
| 0 | -1.1078971   | 0 | -0.13456212  | 0 | 0            | 0            | 0.021684562  |
| 0 | -1.1085937   | 0 | -0.02996442  | 0 | -0.098709508 | 0            | 0.014129705  |
| 0 | -0.007692619 | 0 | -0.15314725  | 0 | 0            | 0            | 0.000367885  |
| 0 | 0            | 0 | -0.15398768  | 0 | 0            | 0            | 0.003167668  |
| 0 | 0            | 0 | -0.009229963 | 0 | -0.13554495  | 0            | 0            |
| 0 | 0            | 0 | -0.003938193 | 0 | -0.10953071  | 0            | 0.0034145    |
| 0 | 0            | 0 | 0            | 0 | -0.14443194  | 0            | 0.001702055  |
| 0 | 0            | 0 | -0.1525271   | 0 | 0            | 0            | 0.001970049  |
| 0 | -1.1069171   | 0 | 0            | 0 | -0.1285424   | 0            | 0.015455128  |
| 0 | 0            | 0 | -0.007507073 | 0 | -0.13611228  | 0            | 0.000360684  |
| 0 | -1.153835    | 0 | 0            | 0 | -0.13991544  | 0            | 0.032449306  |
| 0 | 0            | 0 | -0.14703049  | 0 | 0            | 0            | 0            |
| 0 | -0.016571672 | 0 | 0            | 0 | -0.13387104  | 0            | 0            |
| 0 | -1.1130627   | 0 | -0.03348505  | 0 | -0.096568982 | 0            | 0            |
| 0 | 0            | 0 | -0.14631681  | 0 | 0            | 0            | -0.001594208 |

|   |              |   |              |   |              |              |              |
|---|--------------|---|--------------|---|--------------|--------------|--------------|
| 0 | -1.1113643   | 0 | -0.13830925  | 0 | 0            | 0.030691754  | 0            |
| 0 | 0            | 0 | -0.14483187  | 0 | 0            | -0.002783435 | 0            |
| 0 | 0            | 0 | 0            | 0 | -0.13309641  | 0            | -0.005987285 |
| 0 | 0            | 0 | -0.005299662 | 0 | -0.12758278  | 0            | -0.006067235 |
| 0 | 0            | 0 | 0            | 0 | -0.13295348  | 0            | -0.009587499 |
| 0 | -1.138833    | 0 | -0.13245299  | 0 | 0            | 0            | 0            |
| 0 | 0            | 0 | -0.004066939 | 0 | -0.12949693  | 0            | 0            |
| 0 | -1.1200089   | 0 | -0.13250351  | 0 | 0            | 0            | 0            |
| 0 | 0            | 0 | -0.00718431  | 0 | -0.13100273  | 0            | -0.003238074 |
| 0 | 0            | 0 | 0            | 0 | -0.13365184  | 0            | 0            |
| 0 | 0            | 0 | -0.005607789 | 0 | -0.12804233  | 0            | 0            |
| 0 | -0.025634104 | 0 | 0            | 0 | -0.11638296  | 0            | -0.01355986  |
| 0 | -0.014262654 | 0 | 0            | 0 | -0.1444222   | 0            | -0.006610874 |
| 0 | 0            | 0 | -0.10994304  | 0 | 0            | 0.003003514  | 0            |
| 0 | 0            | 0 | 0            | 0 | -0.11927355  | 0            | -0.001337485 |
| 0 | 0            | 0 | -0.000558273 | 0 | -0.11885486  | 0            | 0            |
| 0 | -0.012662429 | 0 | -0.011473061 | 0 | -0.13228173  | 0            | 0            |
| 0 | -1.106339    | 0 | -0.12605805  | 0 | 0            | 0.014313894  | 0            |
| 0 | -0.02121386  | 0 | -0.016966496 | 0 | -0.10048757  | 0            | 0            |
| 0 | 0            | 0 | 0            | 0 | -0.14335368  | 0            | -0.005251457 |
| 0 | 0            | 0 | -0.12723191  | 0 | 0            | 0            | 0            |
| 0 | 0            | 0 | -0.011824435 | 0 | -0.13109319  | 0            | -0.004473158 |
| 0 | 0            | 0 | -0.011067274 | 0 | -0.13179808  | 0            | 0            |
| 0 | 0            | 0 | 0            | 0 | -0.11571999  | 0            | -0.011716824 |
| 0 | -0.012864252 | 0 | 0            | 0 | -0.13514624  | 0            | -0.014779055 |
| 0 | -1.1094196   | 0 | -0.036913313 | 0 | -0.10938113  | 0            | 0            |
| 0 | 0            | 0 | -0.016815793 | 0 | -0.099900837 | 0            | 0            |
| 0 | 0            | 0 | 0            | 0 | -0.13487927  | 0            | -0.012733414 |
| 0 | 0            | 0 | -0.006419776 | 0 | -0.12853822  | 0            | -0.011721158 |
| 0 | -0.010713507 | 0 | -0.010253205 | 0 | -0.13135672  | 0            | -0.010245305 |
| 0 | 0            | 0 | -0.017236041 | 0 | -0.09758097  | 0            | -0.007619948 |
| 0 | 0            | 0 | -0.128246    | 0 | 0            | 0            | -0.006141299 |
| 0 | -0.007957978 | 0 | -0.004968047 | 0 | -0.13104027  | 0            | 0            |
| 0 | 0            | 0 | -0.009720301 | 0 | -0.13102159  | 0            | -0.008628119 |
| 0 | 0            | 0 | -0.005019162 | 0 | -0.130632    | 0            | 0            |
| 0 | -0.029597128 | 0 | 0            | 0 | -0.11951031  | 0            | -0.014589054 |
| 0 | -0.025323285 | 0 | -0.11354337  | 0 | 0            | 0            | -0.014503891 |
| 0 | -1.1529101   | 0 | -0.13486071  | 0 | 0            | 0            | 0.030910736  |
| 0 | 0            | 0 | -0.13889526  | 0 | 0            | 0            | 0.000487872  |
| 0 | -0.024890123 | 0 | -0.00447914  | 0 | -0.1157733   | 0            | 0            |
| 0 | -0.01629461  | 0 | -0.12772029  | 0 | 0            | 0            | 0            |
| 0 | -0.013508506 | 0 | -0.011360973 | 0 | -0.1230071   | 0            | -0.01579513  |
| 0 | -0.01399313  | 0 | 0            | 0 | -0.13259891  | 0            | -0.016772433 |
| 0 | 0            | 0 | -0.11288141  | 0 | 0            | 0            | -0.012655735 |
| 0 | -0.013042553 | 0 | -0.010341353 | 0 | -0.12304129  | 0            | -0.01670202  |
| 0 | 0            | 0 | 0            | 0 | -0.11865341  | 0            | -0.012654463 |
| 0 | 0            | 0 | -0.12689076  | 0 | 0            | 0            | -0.010863892 |

|   |              |   |              |   |              |   |              |   |
|---|--------------|---|--------------|---|--------------|---|--------------|---|
| 0 | -1.171533    | 0 | -0.020013435 | 0 | -0.11940056  | 0 | 0            | 0 |
| 0 | 0            | 0 | -0.12687581  | 0 | 0            | 0 | -0.007479397 | 0 |
| 0 | 0            | 0 | -0.01064519  | 0 | -0.1227101   | 0 | -0.01436173  | 0 |
| 0 | 0            | 0 | -0.010151337 | 0 | -0.12295414  | 0 | -0.014657076 | 0 |
| 0 | 0            | 0 | 0            | 0 | -0.13250141  | 0 | -0.014678129 | 0 |
| 0 | 0            | 0 | -0.010238103 | 0 | -0.12254253  | 0 | -0.013521628 | 0 |
| 0 | 0            | 0 | -0.12751214  | 0 | 0            | 0 | 0            | 0 |
| 0 | 0            | 0 | -0.11463397  | 0 | 0            | 0 | -0.00297614  | 0 |
| 0 | 0            | 0 | -0.004390157 | 0 | -0.11492499  | 0 | 0            | 0 |
| 0 | -0.008275937 | 0 | -0.00894957  | 0 | -0.12469279  | 0 | 0            | 0 |
| 0 | 0            | 0 | -0.008820992 | 0 | -0.12462992  | 0 | 0            | 0 |
| 0 | -0.013877948 | 0 | -0.13919694  | 0 | 0            | 0 | -0.007411921 | 0 |
| 0 | 0            | 0 | -0.005200649 | 0 | -0.11162038  | 0 | -0.00782877  | 0 |
| 0 | 0            | 0 | -0.1381272   | 0 | 0            | 0 | -0.006041184 | 0 |
| 0 | -0.01277929  | 0 | -0.12902627  | 0 | 0            | 0 | -0.016130188 | 0 |
| 0 | -0.028965534 | 0 | -0.11527943  | 0 | 0            | 0 | -0.015749569 | 0 |
| 0 | 0            | 0 | -0.12875927  | 0 | 0            | 0 | -0.01408592  | 0 |
| 0 | 0            | 0 | -0.11443351  | 0 | 0            | 0 | -0.01380633  | 0 |
| 0 | -0.014347194 | 0 | -0.12688963  | 0 | 0            | 0 | -0.018002841 | 0 |
| 0 | -0.090393329 | 0 | -0.024372401 | 0 | -0.12858566  | 0 | 0.024611158  | 0 |
| 0 | -0.091808958 | 0 | 0            | 0 | -0.15073526  | 0 | 0.022733701  | 0 |
| 0 | -0.088954534 | 0 | 0            | 0 | -0.15340487  | 0 | 0.026187894  | 0 |
| 0 | 0            | 0 | -0.12676404  | 0 | 0            | 0 | -0.01591031  | 0 |
| 0 | -1.1196946   | 0 | -0.029550976 | 0 | -0.12574197  | 0 | 0.062884523  | 0 |
| 0 | 0            | 0 | -0.003293178 | 0 | -0.1076396   | 0 | -0.003614212 | 0 |
| 0 | -0.096126753 | 0 | -0.027272908 | 0 | -0.12410977  | 0 | 0            | 0 |
| 0 | 0            | 0 | 0.004782113  | 0 | -0.11075429  | 0 | -0.00084562  | 0 |
| 0 | -0.096220264 | 0 | 0            | 0 | -0.15066957  | 0 | 0            | 0 |
| 0 | -0.017281396 | 0 | 0            | 0 | -0.10207367  | 0 | -0.012283366 | 0 |
| 0 | -0.013270058 | 0 | -0.006063957 | 0 | -0.096685078 | 0 | 0            | 0 |
| 0 | 0            | 0 | 0            | 0 | -0.10165101  | 0 | -0.010405029 | 0 |
| 0 | -0.094239109 | 0 | -0.035145149 | 0 | -0.12142552  | 0 | 0            | 0 |
| 0 | 0            | 0 | -0.006953732 | 0 | -0.094413566 | 0 | -0.008185927 | 0 |
| 0 | 0            | 0 | -0.006058078 | 0 | -0.096194421 | 0 | 0            | 0 |
| 0 | 0            | 0 | -0.024211839 | 0 | -0.12530413  | 0 | 0.024865906  | 0 |
| 0 | 0            | 0 | 0            | 0 | -0.15053538  | 0 | 0.027064156  | 0 |
| 0 | -0.017361933 | 0 | -0.010211616 | 0 | -0.091382184 | 0 | -0.013623945 | 0 |
| 0 | -0.087163014 | 0 | -0.1458482   | 0 | 0            | 0 | 0.021051383  | 0 |
| 0 | 0            | 0 | 0            | 0 | -0.14793593  | 0 | 0.023898464  | 0 |
| 0 | -0.084916003 | 0 | -0.14803729  | 0 | 0            | 0 | 0.023853343  | 0 |
| 0 | 0            | 0 | -0.010006234 | 0 | -0.091157935 | 0 | -0.011746286 | 0 |
| 0 | -0.017067865 | 0 | -0.09917061  | 0 | 0            | 0 | -0.013220302 | 0 |
| 0 | 0            | 0 | -0.0987489   | 0 | 0            | 0 | -0.011339425 | 0 |
| 0 | -0.091644795 | 0 | -0.14591892  | 0 | 0            | 0 | 0            | 0 |
| 0 | 0            | 0 | -0.028040612 | 0 | -0.12054612  | 0 | 0            | 0 |
| 0 | 0            | 0 | 0            | 0 | -0.14812684  | 0 | 0            | 0 |
| 0 | -0.024382804 | 0 | -0.011352804 | 0 | -0.095753606 | 0 | -0.019270464 | 0 |

|   |              |   |              |   |              |   |              |   |
|---|--------------|---|--------------|---|--------------|---|--------------|---|
| 0 | 0            | 0 | -0.035542961 | 0 | -0.11826035  | 0 | 0            | 0 |
| 0 | 0            | 0 | -0.010991979 | 0 | -0.095383817 | 0 | -0.017262322 | 0 |
| 0 | 0            | 0 | -0.14530054  | 0 | 0            | 0 | 0.024773821  | 0 |
| 0 | 0            | 0 | -0.14319607  | 0 | 0            | 0 | 0.022240788  | 0 |
| 0 | 0            | 0 | -0.14354606  | 0 | 0            | 0 | 0            | 0 |
| 0 | -0.10720789  | 0 | 0            | 0 | -0.14052491  | 0 | 0.024107578  | 0 |
| 0 | -0.10504107  | 0 | -0.022766227 | 0 | -0.12234957  | 0 | 0.031061273  | 0 |
| 0 | 0            | 0 | -0.025413884 | 0 | -0.11303146  | 0 | 0.030790031  | 0 |
| 0 | 0            | 0 | 0            | 0 | -0.13783547  | 0 | 0.031270229  | 0 |
| 0 | -1.0145063   | 0 | 0            | 0 | 0            | 0 | 0            | 0 |
| 0 | 0            | 0 | -0.025473653 | 0 | -0.10919955  | 0 | 0.028463893  | 0 |
| 0 | -0.11334118  | 0 | -0.021814256 | 0 | -0.11821551  | 0 | 0            | 0 |
| 0 | -1.0125615   | 0 | 0            | 0 | 0            | 0 | -0.014775667 | 0 |
| 0 | -1.0131126   | 0 | 0            | 0 | 0            | 0 | 0            | 0 |
| 0 | -0.10294802  | 0 | -0.13561377  | 0 | 0            | 0 | 0.022291931  | 0 |
| 0 | -1.0129982   | 0 | 0            | 0 | 0            | 0 | 0            | 0 |
| 0 | 0            | 0 | -0.13402205  | 0 | 0            | 0 | 0.029187131  | 0 |
| 0 | -0.018295957 | 0 | -0.031281329 | 0 | -0.10705577  | 0 | 0.021080726  | 0 |
| 0 | -0.016727112 | 0 | -0.00135908  | 0 | -0.093031487 | 0 | -0.017423819 | 0 |
| 0 | -0.018175299 | 0 | 0            | 0 | -0.13730315  | 0 | 0.021306193  | 0 |
| 0 | 0            | 0 | 0            | 0 | -0.13759899  | 0 | 0.025644675  | 0 |
| 0 | 0            | 0 | -0.03062163  | 0 | -0.10659514  | 0 | 0.022577558  | 0 |
| 0 | 0            | 0 | -0.001133587 | 0 | -0.092794798 | 0 | -0.015396418 | 0 |
| 0 | -1.0612908   | 0 | 0            | 0 | 0            | 0 | -0.01774446  | 0 |
| 0 | 0            | 0 | 0            | 0 | -0.13637159  | 0 | 0.023049075  | 0 |
| 0 | 0            | 0 | -0.030210348 | 0 | -0.10604057  | 0 | 0.024644582  | 0 |
| 0 | 0            | 0 | -0.031865052 | 0 | -0.10429188  | 0 | 0            | 0 |
| 0 | -1.1409518   | 0 | 0            | 0 | -0.10627625  | 0 | 0.020372453  | 0 |
| 0 | -1.0638169   | 0 | 0            | 0 | 0            | 0 | 0            | 0 |
| 0 | 0            | 0 | -0.022733667 | 0 | -0.11922878  | 0 | 0.032097756  | 0 |
| 0 | -1.063468    | 0 | 0            | 0 | 0            | 0 | 0            | 0 |
| 0 | -0.101844    | 0 | -0.014282349 | 0 | -0.12890949  | 0 | 0.033899091  | 0 |
| 0 | -0.024723123 | 0 | -0.035103894 | 0 | -0.10256912  | 0 | 0            | 0 |
| 0 | -1.0592535   | 0 | 0            | 0 | 0            | 0 | -0.016661458 | 0 |
| 0 | -1.1395288   | 0 | -0.10429721  | 0 | 0            | 0 | 0.019103645  | 0 |
| 0 | -1.1475676   | 0 | -0.02900081  | 0 | -0.077524752 | 0 | 0            | 0 |
| 0 | -0.016909754 | 0 | -0.03198956  | 0 | -0.098968747 | 0 | 0.015630631  | 0 |
| 0 | -0.017792286 | 0 | -0.13396985  | 0 | 0            | 0 | 0.019670091  | 0 |
| 0 | -1.059796    | 0 | 0            | 0 | 0            | 0 | -0.017554807 | 0 |
| 0 | 0            | 0 | -0.034974998 | 0 | -0.10170532  | 0 | 0            | 0 |
| 0 | 0            | 0 | -0.022450132 | 0 | -0.11459276  | 0 | 0            | 0 |
| 0 | -1.1193247   | 0 | -0.032559367 | 0 | -0.07986208  | 0 | 0.02957097   | 0 |
| 0 | -1.0609489   | 0 | 0            | 0 | 0            | 0 | 0            | 0 |
| 0 | 0            | 0 | -0.031521147 | 0 | -0.098594085 | 0 | 0.017422932  | 0 |
| 0 | 0            | 0 | -0.13304246  | 0 | 0            | 0 | 0.021412254  | 0 |
| 0 | 0            | 0 | -0.13282991  | 0 | 0            | 0 | 0.023866331  | 0 |
| 0 | -1.0142673   | 0 | 0            | 0 | 0            | 0 | 0            | 0 |

|   |              |   |              |   |              |   |              |   |
|---|--------------|---|--------------|---|--------------|---|--------------|---|
| 0 | -1.1594515   | 0 | -0.022721084 | 0 | -0.086493651 | 0 | 0.028050193  | 0 |
| 0 | 0            | 0 | -0.014663796 | 0 | -0.12550388  | 0 | 0.035329428  | 0 |
| 0 | -1.0171148   | 0 | 0            | 0 | 0            | 0 | -0.01557217  | 0 |
| 0 | -1.0177238   | 0 | 0            | 0 | 0            | 0 | 0            | 0 |
| 0 | -1.018924    | 0 | 0            | 0 | 0            | 0 | -0.015142726 | 0 |
| 0 | -1.0193053   | 0 | 0            | 0 | 0            | 0 | 0            | 0 |
| 0 | -1.0212294   | 0 | 0            | 0 | 0            | 0 | -0.01440868  | 0 |
| 0 | -1.0627338   | 0 | 0            | 0 | 0            | 0 | -0.016298861 | 0 |
| 0 | -1.0660441   | 0 | 0            | 0 | 0            | 0 | 0            | 0 |
| 0 | -1.0661      | 0 | 0            | 0 | 0            | 0 | -0.016897889 | 0 |
| 0 | -1.0665458   | 0 | 0            | 0 | 0            | 0 | -0.018434792 | 0 |
| 0 | 0            | 0 | -0.019192505 | 0 | -0.10171565  | 0 | 0.033465173  | 0 |
| 0 | -0.095434923 | 0 | 0            | 0 | 0            | 0 | 0            | 0 |
| 0 | -0.09559337  | 0 | 0            | 0 | 0            | 0 | -0.016828835 | 0 |
| 0 | -0.089177223 | 0 | 0            | 0 | 0            | 0 | 0            | 0 |
| 0 | -0.067323147 | 0 | 0            | 0 | 0            | 0 | -0.015885249 | 0 |
| 0 | -0.067865075 | 0 | 0            | 0 | 0            | 0 | -0.016665146 | 0 |
| 0 | -0.058642747 | 0 | 0            | 0 | 0            | 0 | 0            | 0 |
| 0 | -0.098168648 | 0 | 0            | 0 | 0            | 0 | 0            | 0 |
| 0 | 0            | 0 | 0            | 0 | 0            | 0 | 0            | 0 |
| 0 | 0            | 0 | 0            | 0 | 0            | 0 | -0.015158933 | 0 |
| 0 | 0            | 0 | 0            | 0 | 0            | 0 | 0            | 0 |
| 0 | -0.10174492  | 0 | 0            | 0 | 0            | 0 | -0.020963432 | 0 |
| 0 | 0            | 0 | 0            | 0 | 0            | 0 | -0.014187636 | 0 |
| 0 | 0            | 0 | 0            | 0 | 0            | 0 | 0            | 0 |
| 0 | 0            | 0 | 0            | 0 | 0            | 0 | -0.015016692 | 0 |
| 0 | -0.095565861 | 0 | 0            | 0 | 0            | 0 | -0.019668392 | 0 |
| 0 | 0            | 0 | 0            | 0 | 0            | 0 | 0            | 0 |
| 0 | 0            | 0 | 0            | 0 | 0            | 0 | 0            | 0 |
| 0 | 0            | 0 | 0            | 0 | 0            | 0 | -0.007710984 | 0 |
| 0 | -0.065491456 | 0 | 0            | 0 | 0            | 0 | -0.019218794 | 0 |
| 0 | 0            | 0 | 0            | 0 | 0            | 0 | -0.019222957 | 0 |
| 0 | -0.01499264  | 0 | 0            | 0 | 0            | 0 | 0            | 0 |
| 0 | 0            | 0 | 0            | 0 | 0            | 0 | -0.01093187  | 0 |
| 0 | -0.014730035 | 0 | 0            | 0 | 0            | 0 | -0.015487876 | 0 |
| 0 | 0            | 0 | 0            | 0 | 0            | 0 | -0.007160033 | 0 |
| 0 | 0            | 0 | 0            | 0 | 0            | 0 | -0.017908481 | 0 |
| 0 | 0            | 0 | 0            | 0 | 0            | 0 | -0.00789742  | 0 |
| 0 | 0            | 0 | 0            | 0 | 0            | 0 | 0            | 0 |
| 0 | 0            | 0 | 0            | 0 | 0            | 0 | -0.013652247 | 0 |
| 0 | 0            | 0 | 0            | 0 | 0            | 0 | -0.017393969 | 0 |
| 0 | -0.013018851 | 0 | 0            | 0 | 0            | 0 | -0.017715412 | 0 |
| 0 | 0            | 0 | 0            | 0 | 0            | 0 | -0.015803558 | 0 |
| 0 | -0.00838414  | 0 | 0            | 0 | 0            | 0 | -0.016271299 | 0 |
| 0 | 0            | 0 | 0            | 0 | 0            | 0 | -0.01437914  | 0 |
| 0 | 0            | 0 | 0            | 0 | 0            | 0 | -0.009450929 | 0 |
| 0 | 0            | 0 | -0.026136048 | 0 | -0.080308976 | 0 | 0.02207547   | 0 |



|   |              |   |              |   |              |   |              |   |
|---|--------------|---|--------------|---|--------------|---|--------------|---|
| 0 | -0.000899049 | 0 | -0.026522791 | 0 | -0.080441739 | 0 | 0.020294118  | 0 |
| 0 | -1.0930446   | 0 | 0            | 0 | 0            | 0 | 0            | 0 |
| 0 | -1.0879201   | 0 | 0            | 0 | 0            | 0 | 0.008279881  | 0 |
| 0 | -0.019242339 | 0 | 0            | 0 | 0            | 0 | -0.019092311 | 0 |
| 0 | -1.0887555   | 0 | 0            | 0 | 0            | 0 | 0            | 0 |
| 0 | 0            | 0 | 0            | 0 | 0            | 0 | -0.017165314 | 0 |
| 0 | -1.0947219   | 0 | 0            | 0 | 0            | 0 | 0.012120741  | 0 |
| 0 | -1.0662857   | 0 | 0            | 0 | 0            | 0 | 0.012698673  | 0 |
| 0 | -1.0971539   | 0 | 0            | 0 | 0            | 0 | 0.013081326  | 0 |
| 0 | -1.0653151   | 0 | 0            | 0 | 0            | 0 | 0.015326996  | 0 |
| 0 | -1.1000598   | 0 | 0            | 0 | 0            | 0 | 0            | 0 |
| 0 | -1.06377     | 0 | 0            | 0 | 0            | 0 | 0            | 0 |
| 0 | -1.0642904   | 0 | 0            | 0 | 0            | 0 | 0.021856401  | 0 |
| 0 | -1.1227204   | 0 | 0            | 0 | 0            | 0 | 0.020943893  | 0 |
| 0 | -1.1249244   | 0 | 0            | 0 | 0            | 0 | 0            | 0 |
| 0 | -1.1259787   | 0 | 0            | 0 | 0            | 0 | 0.018480366  | 0 |
| 0 | -1.1173842   | 0 | 0            | 0 | 0            | 0 | 0.017303618  | 0 |
| 0 | -1.0715437   | 0 | 0            | 0 | 0            | 0 | 0.03726205   | 0 |
| 0 | -0.013563987 | 0 | 0            | 0 | 0            | 0 | 0.009934216  | 0 |
| 0 | 0            | 0 | 0            | 0 | 0            | 0 | 0.009790499  | 0 |
| 0 | -0.015122904 | 0 | 0            | 0 | 0            | 0 | 0            | 0 |
| 0 | 0            | 0 | 0            | 0 | 0            | 0 | 0.010728805  | 0 |
| 0 | 0            | 0 | 0            | 0 | 0            | 0 | 0            | 0 |
| 0 | 0            | 0 | 0            | 0 | 0            | 0 | 0.008948494  | 0 |
| 0 | 0            | 0 | 0            | 0 | 0            | 0 | 0.013029622  | 0 |
| 0 | -0.005637312 | 0 | 0            | 0 | 0            | 0 | 0.012940473  | 0 |
| 0 | 0.007842019  | 0 | 0            | 0 | 0            | 0 | 0.007414574  | 0 |
| 0 | 0            | 0 | 0            | 0 | 0            | 0 | 0.014449904  | 0 |
| 0 | -0.005413724 | 0 | 0            | 0 | 0            | 0 | 0.014053637  | 0 |
| 0 | -0.034987831 | 0 | 0            | 0 | 0            | 0 | 0.018483289  | 0 |
| 0 | 0            | 0 | 0            | 0 | 0            | 0 | 0.020037158  | 0 |
| 0 | -1.0220523   | 0 | 0            | 0 | -0.14711786  | 0 | 0            | 0 |
| 0 | -1.0206121   | 0 | 0            | 0 | -0.13853977  | 0 | 0            | 0 |
| 0 | -1.0230878   | 0 | 0            | 0 | -0.13584303  | 0 | 0            | 0 |
| 0 | -1.0226628   | 0 | 0            | 0 | -0.13486054  | 0 | -0.009037915 | 0 |
| 0 | -1.0230166   | 0 | 0.000276177  | 0 | -0.13555301  | 0 | 0            | 0 |
| 0 | -1.022137    | 0 | -0.14032903  | 0 | 0            | 0 | 0            | 0 |
| 0 | -1.020578    | 0 | -0.13297111  | 0 | 0            | 0 | 0            | 0 |
| 0 | -1.0230555   | 0 | -0.12983438  | 0 | 0            | 0 | 0            | 0 |
| 0 | -1.0226058   | 0 | -0.12911576  | 0 | 0            | 0 | -0.010263896 | 0 |
| 0 | -1.0948218   | 0 | 0            | 0 | -0.13554755  | 0 | 0            | 0 |
| 0 | -1.0976818   | 0 | 0            | 0 | -0.13965975  | 0 | 0            | 0 |
| 0 | -1.0658247   | 0 | 0            | 0 | -0.164488    | 0 | 0.007030681  | 0 |
| 0 | -1.0961956   | 0 | 0            | 0 | -0.13743798  | 0 | -0.013158663 | 0 |
| 0 | -1.0672608   | 0 | -0.018954713 | 0 | -0.14639034  | 0 | 0            | 0 |
| 0 | -1.0679646   | 0 | 0            | 0 | -0.16514168  | 0 | 0            | 0 |
| 0 | -1.0674617   | 0 | 0            | 0 | -0.16484279  | 0 | 0            | 0 |

|   |             |   |              |   |             |   |              |   |
|---|-------------|---|--------------|---|-------------|---|--------------|---|
| 0 | -1.0272412  | 0 | 0            | 0 | -0.14640233 | 0 | 0            | 0 |
| 0 | -1.0983089  | 0 | 0            | 0 | -0.13765381 | 0 | 0            | 0 |
| 0 | -1.0984447  | 0 | 0.001291485  | 0 | -0.13924273 | 0 | 0            | 0 |
| 0 | -1.0945781  | 0 | 0            | 0 | -0.12781709 | 0 | -0.012408908 | 0 |
| 0 | -1.0947328  | 0 | 0            | 0 | -0.12962746 | 0 | -0.01397946  | 0 |
| 0 | -1.0965329  | 0 | 0.008611029  | 0 | -0.13664366 | 0 | 0            | 0 |
| 0 | -1.097095   | 0 | 0.00270855   | 0 | -0.13268476 | 0 | 0            | 0 |
| 0 | -1.0943175  | 0 | -0.12935414  | 0 | 0           | 0 | 0            | 0 |
| 0 | -1.0270477  | 0 | 0            | 0 | -0.14405337 | 0 | -0.008639885 | 0 |
| 0 | -1.0216861  | 0 | 0            | 0 | -0.1295935  | 0 | 0            | 0 |
| 0 | -1.0268871  | 0 | 0            | 0 | -0.14411868 | 0 | 0            | 0 |
| 0 | -1.0274422  | 0 | -0.016453114 | 0 | -0.12866404 | 0 | 0            | 0 |
| 0 | -1.0950317  | 0 | 0.004449701  | 0 | -0.13143585 | 0 | -0.013654575 | 0 |
| 0 | -1.1008186  | 0 | 0            | 0 | -0.15526261 | 0 | 0            | 0 |
| 0 | -1.1012341  | 0 | -0.009796215 | 0 | -0.14491854 | 0 | 0            | 0 |
| 0 | -1.101157   | 0 | 0            | 0 | -0.15447499 | 0 | 0.000408391  | 0 |
| 0 | -1.1010245  | 0 | -0.009879526 | 0 | -0.14270808 | 0 | -0.00148389  | 0 |
| 0 | -1.1012025  | 0 | -0.009506332 | 0 | -0.1427875  | 0 | 0            | 0 |
| 0 | -1.1009059  | 0 | 0            | 0 | -0.15236501 | 0 | -0.001334388 | 0 |
| 0 | -1.0970119  | 0 | -0.13247488  | 0 | 0           | 0 | 0            | 0 |
| 0 | -0.11218426 | 0 | 0            | 0 | -0.14608779 | 0 | 0            | 0 |
| 0 | -1.0271721  | 0 | -0.14022859  | 0 | 0           | 0 | 0            | 0 |
| 0 | -1.0953529  | 0 | -0.13076417  | 0 | 0           | 0 | -0.014404385 | 0 |
| 0 | -1.0596752  | 0 | 0            | 0 | -0.15937842 | 0 | 0            | 0 |
| 0 | -1.0575326  | 0 | -0.021287744 | 0 | -0.13794268 | 0 | 0            | 0 |
| 0 | -1.057024   | 0 | 0            | 0 | -0.15850069 | 0 | 0.003229027  | 0 |
| 0 | -1.0666584  | 0 | -0.15810789  | 0 | 0           | 0 | 0.005780806  | 0 |
| 0 | -1.0536408  | 0 | -0.022053416 | 0 | -0.13464336 | 0 | 0            | 0 |
| 0 | -1.0533735  | 0 | -0.021750263 | 0 | -0.13491417 | 0 | 0.000926646  | 0 |
| 0 | -1.0679495  | 0 | -0.15836391  | 0 | 0           | 0 | 0            | 0 |
| 0 | -1.0679038  | 0 | -0.15839538  | 0 | 0           | 0 | 0            | 0 |
| 0 | -1.0975657  | 0 | -0.13074599  | 0 | 0           | 0 | 0            | 0 |
| 0 | -1.0534862  | 0 | 0            | 0 | -0.15596611 | 0 | 0.001137855  | 0 |
| 0 | -1.0939972  | 0 | -0.12411068  | 0 | 0           | 0 | -0.015126917 | 0 |
| 0 | -1.0216313  | 0 | -0.12540774  | 0 | 0           | 0 | 0            | 0 |
| 0 | -1.0937923  | 0 | -0.12187082  | 0 | 0           | 0 | -0.01365752  | 0 |
| 0 | -1.026939   | 0 | -0.13840062  | 0 | 0           | 0 | -0.009941835 | 0 |
| 0 | -1.0266092  | 0 | -0.13833317  | 0 | 0           | 0 | 0            | 0 |
| 0 | -0.10292285 | 0 | 0            | 0 | -0.14882994 | 0 | 0            | 0 |
| 0 | -0.10784216 | 0 | 0            | 0 | -0.14681783 | 0 | -0.010166945 | 0 |
| 0 | -0.10664755 | 0 | 0            | 0 | -0.14663363 | 0 | 0            | 0 |
| 0 | -1.1003461  | 0 | -0.14866435  | 0 | 0           | 0 | 0            | 0 |
| 0 | -1.1005739  | 0 | -0.14789098  | 0 | 0           | 0 | -0.000905232 | 0 |
| 0 | -0.10456505 | 0 | -0.003139895 | 0 | -0.1443771  | 0 | 0            | 0 |
| 0 | -1.1003329  | 0 | -0.14636741  | 0 | 0           | 0 | -0.002135731 | 0 |
| 0 | -0.12281813 | 0 | 0            | 0 | -0.14004848 | 0 | -0.010962134 | 0 |
| 0 | 0           | 0 | 0            | 0 | -0.14387426 | 0 | 0            | 0 |

|   |              |   |              |   |             |   |              |   |
|---|--------------|---|--------------|---|-------------|---|--------------|---|
| 0 | -1.1003699   | 0 | 0            | 0 | -0.13568952 | 0 | 0            | 0 |
| 0 | -0.11959165  | 0 | -0.002613856 | 0 | -0.13801791 | 0 | 0            | 0 |
| 0 | -0.12789486  | 0 | 0            | 0 | -0.13750474 | 0 | -0.009612298 | 0 |
| 0 | -1.0603597   | 0 | -0.15361857  | 0 | 0           | 0 | 0            | 0 |
| 0 | -0.12508542  | 0 | 0.003804355  | 0 | -0.1416843  | 0 | 0            | 0 |
| 0 | -0.10682392  | 0 | -0.13976346  | 0 | 0           | 0 | 0            | 0 |
| 0 | -1.05789     | 0 | -0.15268114  | 0 | 0           | 0 | 0.001963658  | 0 |
| 0 | -1.055176    | 0 | -0.15083482  | 0 | 0           | 0 | 0.000415014  | 0 |
| 0 | -1.1016294   | 0 | 0            | 0 | -0.14495323 | 0 | -0.004534555 | 0 |
| 0 | -1.1023664   | 0 | -0.012365518 | 0 | -0.13222795 | 0 | 0            | 0 |
| 0 | -0.12831286  | 0 | 0.000262581  | 0 | -0.13717275 | 0 | -0.010740346 | 0 |
| 0 | -1.1008794   | 0 | 0            | 0 | -0.13692426 | 0 | -0.011670792 | 0 |
| 0 | -1.1022864   | 0 | -0.010878497 | 0 | -0.13151406 | 0 | -0.007899774 | 0 |
| 0 | -1.1029558   | 0 | -0.006551504 | 0 | -0.13114688 | 0 | 0            | 0 |
| 0 | 0            | 0 | 0            | 0 | -0.14816219 | 0 | 0            | 0 |
| 0 | 0            | 0 | 0            | 0 | -0.14621161 | 0 | -0.008534006 | 0 |
| 0 | 0            | 0 | 0            | 0 | -0.14606979 | 0 | 0            | 0 |
| 0 | -0.099326998 | 0 | -0.14148274  | 0 | 0           | 0 | 0            | 0 |
| 0 | 0            | 0 | -0.004595028 | 0 | -0.14226924 | 0 | 0            | 0 |
| 0 | -1.0964154   | 0 | 0            | 0 | -0.12057213 | 0 | -0.011612009 | 0 |
| 0 | -1.1017021   | 0 | -0.011779334 | 0 | -0.12317991 | 0 | -0.013677294 | 0 |
| 0 | -1.1018228   | 0 | -0.011527749 | 0 | -0.12368636 | 0 | -0.013586754 | 0 |
| 0 | -1.1015509   | 0 | 0            | 0 | -0.13459564 | 0 | -0.013587026 | 0 |
| 0 | -1.0996957   | 0 | -0.12956884  | 0 | 0           | 0 | 0            | 0 |
| 0 | -0.1045794   | 0 | -0.13989778  | 0 | 0           | 0 | -0.011549507 | 0 |
| 0 | -0.11774621  | 0 | -0.13437036  | 0 | 0           | 0 | -0.012241598 | 0 |
| 0 | -0.10346268  | 0 | -0.13961043  | 0 | 0           | 0 | 0            | 0 |
| 0 | -1.0984375   | 0 | -0.005886523 | 0 | -0.11535381 | 0 | 0            | 0 |
| 0 | -1.1040722   | 0 | -0.010284684 | 0 | -0.12526569 | 0 | 0            | 0 |
| 0 | 0            | 0 | 0            | 0 | -0.13773799 | 0 | -0.00950222  | 0 |
| 0 | 0            | 0 | -0.13768379  | 0 | 0           | 0 | 0            | 0 |
| 0 | -1.0269211   | 0 | 0            | 0 | -0.11626257 | 0 | -0.011463684 | 0 |
| 0 | 0            | 0 | -0.003463966 | 0 | -0.13480898 | 0 | 0            | 0 |
| 0 | -0.12288219  | 0 | -0.13138124  | 0 | 0           | 0 | -0.01099309  | 0 |
| 0 | -1.1010918   | 0 | -0.13973279  | 0 | 0           | 0 | -0.005341958 | 0 |
| 0 | -1.0274522   | 0 | -0.017125742 | 0 | -0.10013464 | 0 | 0            | 0 |
| 0 | 0            | 0 | 0            | 0 | -0.13496817 | 0 | -0.008132324 | 0 |
| 0 | 0            | 0 | 0.003269093  | 0 | -0.13854672 | 0 | 0            | 0 |
| 0 | -1.1000695   | 0 | -0.13081259  | 0 | 0           | 0 | -0.013036038 | 0 |
| 0 | 0            | 0 | -0.000124438 | 0 | -0.13425654 | 0 | -0.009272993 | 0 |
| 0 | -1.0958114   | 0 | -0.11637404  | 0 | 0           | 0 | -0.012780482 | 0 |
| 0 | -1.026641    | 0 | -0.11342481  | 0 | 0           | 0 | -0.012406964 | 0 |
| 0 | 0            | 0 | -0.14096086  | 0 | 0           | 0 | 0            | 0 |
| 0 | -1.1006739   | 0 | -0.12886319  | 0 | 0           | 0 | -0.014838049 | 0 |
| 0 | 0            | 0 | -0.13942747  | 0 | 0           | 0 | -0.00990317  | 0 |
| 0 | 0            | 0 | -0.13918128  | 0 | 0           | 0 | 0            | 0 |
| 0 | 0            | 0 | -0.13219825  | 0 | 0           | 0 | -0.010749575 | 0 |

|   |              |   |              |   |              |   |              |   |
|---|--------------|---|--------------|---|--------------|---|--------------|---|
| 0 | 0            | 0 | 0            | 0 | -0.14373466  | 0 | 0            | 0 |
| 0 | -0.11372719  | 0 | 0            | 0 | -0.13567546  | 0 | -0.013998671 | 0 |
| 0 | 0            | 0 | -0.12896934  | 0 | 0            | 0 | -0.009481055 | 0 |
| 0 | -0.10942124  | 0 | 0.006428684  | 0 | -0.14252717  | 0 | 0            | 0 |
| 0 | -0.10845027  | 0 | 0            | 0 | -0.13667618  | 0 | 0            | 0 |
| 0 | 0            | 0 | -0.0090784   | 0 | -0.13636507  | 0 | 0            | 0 |
| 0 | 0            | 0 | 0            | 0 | -0.14522093  | 0 | 0.001097912  | 0 |
| 0 | -1.1150711   | 0 | 0            | 0 | -0.14759582  | 0 | 0.021667513  | 0 |
| 0 | -0.019677343 | 0 | 0            | 0 | -0.1443618   | 0 | 0            | 0 |
| 0 | -1.1068231   | 0 | -0.025216334 | 0 | -0.12587357  | 0 | 0.025276863  | 0 |
| 0 | -1.1066602   | 0 | 0            | 0 | -0.15212581  | 0 | 0.027537983  | 0 |
| 0 | 0            | 0 | 0            | 0 | -0.14412286  | 0 | 0            | 0 |
| 0 | -0.1065281   | 0 | 0            | 0 | -0.13782457  | 0 | -0.014464634 | 0 |
| 0 | 0            | 0 | 0            | 0 | -0.14352061  | 0 | -0.003472597 | 0 |
| 0 | 0            | 0 | -0.013369453 | 0 | -0.13084483  | 0 | 0            | 0 |
| 0 | 0            | 0 | -0.011989359 | 0 | -0.13192497  | 0 | 0            | 0 |
| 0 | 0            | 0 | -0.012095188 | 0 | -0.13173328  | 0 | -0.000364269 | 0 |
| 0 | 0            | 0 | 0            | 0 | -0.14349485  | 0 | -0.000276969 | 0 |
| 0 | -0.1019514   | 0 | 0.007062058  | 0 | -0.14535659  | 0 | 0            | 0 |
| 0 | -1.1234698   | 0 | -0.026592424 | 0 | -0.12162466  | 0 | 0            | 0 |
| 0 | -1.1250913   | 0 | 0            | 0 | -0.14816939  | 0 | 0            | 0 |
| 0 | -0.11023544  | 0 | 0            | 0 | -0.13561216  | 0 | -0.016129043 | 0 |
| 0 | -0.10877982  | 0 | 0.002718528  | 0 | -0.13884832  | 0 | -0.015920204 | 0 |
| 0 | -0.12553008  | 0 | 0.008916963  | 0 | -0.13749851  | 0 | -0.014955108 | 0 |
| 0 | 0            | 0 | 0            | 0 | -0.12894854  | 0 | 0.004486818  | 0 |
| 0 | 0            | 0 | -0.13742239  | 0 | 0            | 0 | 0            | 0 |
| 0 | 0            | 0 | -0.008255674 | 0 | -0.12047448  | 0 | 0            | 0 |
| 0 | -0.058692494 | 0 | -0.017948021 | 0 | -0.15053046  | 0 | 0.007604523  | 0 |
| 0 | -0.12158343  | 0 | 0.003223582  | 0 | -0.13354178  | 0 | -0.016558564 | 0 |
| 0 | -0.058909925 | 0 | 0            | 0 | -0.16792377  | 0 | 0.007794142  | 0 |
| 0 | -0.058915808 | 0 | 0            | 0 | -0.1678983   | 0 | 0.007727355  | 0 |
| 0 | -0.013262923 | 0 | 0            | 0 | -0.14575462  | 0 | -0.009040412 | 0 |
| 0 | -0.059923506 | 0 | -0.019370592 | 0 | -0.1491859   | 0 | 0            | 0 |
| 0 | -0.05950886  | 0 | -0.019424232 | 0 | -0.14940202  | 0 | 0            | 0 |
| 0 | -0.060024001 | 0 | 0            | 0 | -0.16800654  | 0 | 0            | 0 |
| 0 | -0.10502097  | 0 | 0.00391692   | 0 | -0.14013861  | 0 | 0            | 0 |
| 0 | -0.010286216 | 0 | -0.012663588 | 0 | -0.13410737  | 0 | 0            | 0 |
| 0 | -1.0353484   | 0 | 0            | 0 | -0.10245091  | 0 | -0.010149458 | 0 |
| 0 | 0            | 0 | 0            | 0 | -0.14550784  | 0 | -0.007157354 | 0 |
| 0 | -0.10904869  | 0 | -0.12937875  | 0 | 0            | 0 | -0.015358127 | 0 |
| 0 | 0            | 0 | -0.01329061  | 0 | -0.13249042  | 0 | -0.005932597 | 0 |
| 0 | 0            | 0 | 0            | 0 | -0.13323949  | 0 | -0.012336636 | 0 |
| 0 | 0            | 0 | -0.012651534 | 0 | -0.13373661  | 0 | 0            | 0 |
| 0 | -1.0358104   | 0 | -0.006503807 | 0 | -0.096552143 | 0 | 0            | 0 |
| 0 | -1.1139755   | 0 | -0.14280169  | 0 | 0            | 0 | 0.020015985  | 0 |
| 0 | -1.1042648   | 0 | -0.036745031 | 0 | -0.11871456  | 0 | 0            | 0 |
| 0 | -0.031016287 | 0 | 0            | 0 | -0.12957845  | 0 | -0.008762043 | 0 |

|   |              |   |              |   |              |   |              |   |
|---|--------------|---|--------------|---|--------------|---|--------------|---|
| 0 | 0            | 0 | 0            | 0 | -0.13596439  | 0 | 0            | 0 |
| 0 | -1.1060989   | 0 | -0.1468871   | 0 | 0            | 0 | 0.02521872   | 0 |
| 0 | 0            | 0 | 0.005587675  | 0 | -0.13919261  | 0 | 0            | 0 |
| 0 | -0.028246161 | 0 | -0.012211878 | 0 | -0.11825942  | 0 | 0            | 0 |
| 0 | 0            | 0 | -0.1387133   | 0 | 0            | 0 | -0.00067804  | 0 |
| 0 | -1.100398    | 0 | -0.01233293  | 0 | -0.096106898 | 0 | -0.016189928 | 0 |
| 0 | -0.019379461 | 0 | -0.13827067  | 0 | 0            | 0 | 0            | 0 |
| 0 | -0.10536769  | 0 | -0.12938377  | 0 | 0            | 0 | 0            | 0 |
| 0 | -1.0353157   | 0 | -0.010428229 | 0 | -0.091547134 | 0 | -0.011494417 | 0 |
| 0 | -0.015022306 | 0 | 0            | 0 | -0.14316322  | 0 | -0.010954244 | 0 |
| 0 | 0            | 0 | -0.13804093  | 0 | 0            | 0 | 0            | 0 |
| 0 | -0.013450626 | 0 | -0.017087029 | 0 | -0.12734208  | 0 | -0.010853797 | 0 |
| 0 | 0            | 0 | 0            | 0 | -0.12879624  | 0 | -0.00698535  | 0 |
| 0 | 0            | 0 | -0.018403093 | 0 | -0.14791878  | 0 | 0.008111383  | 0 |
| 0 | 0            | 0 | 0            | 0 | -0.16606516  | 0 | 0.008537748  | 0 |
| 0 | 0            | 0 | 0            | 0 | -0.16581992  | 0 | 0.008302376  | 0 |
| 0 | 0            | 0 | -0.13741626  | 0 | 0            | 0 | -0.004875888 | 0 |
| 0 | 0            | 0 | -0.012111234 | 0 | -0.1174726   | 0 | 0            | 0 |
| 0 | -0.011361608 | 0 | -0.016803165 | 0 | -0.12759227  | 0 | 0            | 0 |
| 0 | 0            | 0 | 0            | 0 | -0.13708591  | 0 | -0.012703078 | 0 |
| 0 | 0            | 0 | 0            | 0 | -0.14306021  | 0 | -0.009034629 | 0 |
| 0 | 0            | 0 | -0.016912366 | 0 | -0.12726095  | 0 | -0.008972805 | 0 |
| 0 | 0            | 0 | -0.019840668 | 0 | -0.14691297  | 0 | 0            | 0 |
| 0 | 0            | 0 | -0.019826346 | 0 | -0.14692763  | 0 | 0            | 0 |
| 0 | 0            | 0 | -0.017258771 | 0 | -0.12629055  | 0 | -0.007507922 | 0 |
| 0 | 0            | 0 | 0            | 0 | -0.16620293  | 0 | 0            | 0 |
| 0 | -1.0349336   | 0 | -0.099548876 | 0 | 0            | 0 | -0.01109037  | 0 |
| 0 | -1.1230101   | 0 | -0.14349004  | 0 | 0            | 0 | 0            | 0 |
| 0 | 0            | 0 | -0.016649453 | 0 | -0.12752102  | 0 | 0            | 0 |
| 0 | 0            | 0 | -0.13725872  | 0 | 0            | 0 | -0.001904161 | 0 |
| 0 | -0.10362438  | 0 | -0.13056789  | 0 | 0            | 0 | -0.015874773 | 0 |
| 0 | 0            | 0 | 0.005688222  | 0 | -0.14318934  | 0 | 0            | 0 |
| 0 | 0            | 0 | -0.12434569  | 0 | 0            | 0 | 0.002718841  | 0 |
| 0 | 0            | 0 | -0.01206517  | 0 | -0.11482549  | 0 | -0.001763804 | 0 |
| 0 | 0            | 0 | 0            | 0 | -0.13498395  | 0 | -0.014370071 | 0 |
| 0 | -0.1077023   | 0 | -0.12866506  | 0 | 0            | 0 | -0.017431481 | 0 |
| 0 | 0            | 0 | 0.001391497  | 0 | -0.13676364  | 0 | -0.014221555 | 0 |
| 0 | -0.071942564 | 0 | -0.009985531 | 0 | -0.14663998  | 0 | 0            | 0 |
| 0 | -0.071901329 | 0 | 0            | 0 | -0.15637526  | 0 | 0.000409649  | 0 |
| 0 | -0.01318425  | 0 | -0.13957483  | 0 | 0            | 0 | -0.0105238   | 0 |
| 0 | -0.030378623 | 0 | -0.12537906  | 0 | 0            | 0 | -0.010036067 | 0 |
| 0 | -0.072438579 | 0 | -0.008950128 | 0 | -0.14700336  | 0 | -0.000619287 | 0 |
| 0 | 0            | 0 | -0.019020758 | 0 | -0.14284103  | 0 | 0.01020698   | 0 |
| 0 | -0.075152684 | 0 | -0.009267594 | 0 | -0.14517133  | 0 | -0.001803081 | 0 |
| 0 | 0            | 0 | 0            | 0 | -0.1613945   | 0 | 0.010555167  | 0 |
| 0 | 0            | 0 | -0.019097525 | 0 | -0.14157909  | 0 | 0.009242109  | 0 |
| 0 | 0            | 0 | 0.002556069  | 0 | -0.1381183   | 0 | 0            | 0 |

|   |              |   |              |   |              |   |              |   |
|---|--------------|---|--------------|---|--------------|---|--------------|---|
| 0 | 0            | 0 | -0.1393302   | 0 | 0            | 0 | -0.008636096 | 0 |
| 0 | 0            | 0 | -0.020938588 | 0 | -0.14098793  | 0 | 0            | 0 |
| 0 | 0            | 0 | 0.008576845  | 0 | -0.1342937   | 0 | -0.013392494 | 0 |
| 0 | 0            | 0 | 0.002540706  | 0 | -0.13022668  | 0 | -0.015026256 | 0 |
| 0 | 0            | 0 | -0.12709599  | 0 | 0            | 0 | -0.013658013 | 0 |
| 0 | -0.054873015 | 0 | -0.16132149  | 0 | 0            | 0 | 0.00652889   | 0 |
| 0 | -0.055321509 | 0 | -0.16100573  | 0 | 0            | 0 | 0.006089409  | 0 |
| 0 | 0            | 0 | -0.12460679  | 0 | 0            | 0 | -0.008252784 | 0 |
| 0 | -0.056203814 | 0 | -0.16122795  | 0 | 0            | 0 | 0            | 0 |
| 0 | -0.015405606 | 0 | -0.13743172  | 0 | 0            | 0 | -0.012301874 | 0 |
| 0 | 0            | 0 | -0.12882422  | 0 | 0            | 0 | 0            | 0 |
| 0 | 0            | 0 | -0.13730588  | 0 | 0            | 0 | -0.010383808 | 0 |
| 0 | -0.009739485 | 0 | -0.02329744  | 0 | -0.13866137  | 0 | 0            | 0 |
| 0 | -0.008599242 | 0 | 0            | 0 | -0.16117932  | 0 | 0.003993775  | 0 |
| 0 | 0            | 0 | -0.022165519 | 0 | -0.13891702  | 0 | 0.005369083  | 0 |
| 0 | -0.006704888 | 0 | -0.021754995 | 0 | -0.13928346  | 0 | 0.002531327  | 0 |
| 0 | 0            | 0 | -0.023019906 | 0 | -0.13826522  | 0 | 0            | 0 |
| 0 | 0            | 0 | 0            | 0 | -0.16047205  | 0 | 0.005495666  | 0 |
| 0 | 0            | 0 | -0.021376729 | 0 | -0.13905635  | 0 | 0.004221075  | 0 |
| 0 | -0.007846774 | 0 | -0.022873169 | 0 | -0.13610447  | 0 | 0.00089324   | 0 |
| 0 | 0            | 0 | -0.022353531 | 0 | -0.13600086  | 0 | 0.002491541  | 0 |
| 0 | -1.1327836   | 0 | 0            | 0 | -0.13796216  | 0 | 0.023651956  | 0 |
| 0 | 0            | 0 | -0.1299671   | 0 | 0            | 0 | -0.014094756 | 0 |
| 0 | 0            | 0 | -0.009756587 | 0 | -0.14408454  | 0 | 0            | 0 |
| 0 | 0            | 0 | 0            | 0 | -0.15357188  | 0 | 0.000669615  | 0 |
| 0 | 0            | 0 | -0.01022298  | 0 | -0.11021563  | 0 | 0.002001613  | 0 |
| 0 | 0            | 0 | -0.008564912 | 0 | -0.14452282  | 0 | -0.000433075 | 0 |
| 0 | 0            | 0 | -0.15932533  | 0 | 0            | 0 | 0.00704877   | 0 |
| 0 | 0            | 0 | -0.15927628  | 0 | 0            | 0 | 0.006914441  | 0 |
| 0 | 0            | 0 | -0.008778473 | 0 | -0.1422422   | 0 | -0.002132652 | 0 |
| 0 | 0            | 0 | -0.15952455  | 0 | 0            | 0 | 0            | 0 |
| 0 | 0            | 0 | -0.12816479  | 0 | 0            | 0 | -0.015658846 | 0 |
| 0 | -1.1086681   | 0 | -0.031627124 | 0 | -0.10727565  | 0 | 0.023050873  | 0 |
| 0 | -1.1144631   | 0 | 0            | 0 | -0.13627285  | 0 | 0.02109351   | 0 |
| 0 | -1.102122    | 0 | -0.00254542  | 0 | -0.093513155 | 0 | -0.01434164  | 0 |
| 0 | -1.1122294   | 0 | -0.023777485 | 0 | -0.11989451  | 0 | 0.032502294  | 0 |
| 0 | -1.14081     | 0 | -0.02132235  | 0 | -0.11616307  | 0 | 0            | 0 |
| 0 | 0            | 0 | -0.15531594  | 0 | 0            | 0 | 0.008904114  | 0 |
| 0 | -0.068065004 | 0 | -0.1497845   | 0 | 0            | 0 | -0.000831055 | 0 |
| 0 | 0            | 0 | 0            | 0 | -0.13342262  | 0 | -0.003833563 | 0 |
| 0 | 0            | 0 | -0.002172167 | 0 | -0.13153184  | 0 | 0            | 0 |
| 0 | -1.121301    | 0 | -0.033673381 | 0 | -0.10293428  | 0 | 0            | 0 |
| 0 | 0            | 0 | -0.001262817 | 0 | -0.11284186  | 0 | 0.004596223  | 0 |
| 0 | 0            | 0 | -0.001994642 | 0 | -0.13276769  | 0 | -0.004528024 | 0 |
| 0 | -1.1312299   | 0 | -0.13312551  | 0 | 0            | 0 | 0.021867817  | 0 |
| 0 | -0.008414955 | 0 | -0.15540575  | 0 | 0            | 0 | 0.002742236  | 0 |
| 0 | 0            | 0 | -0.15469287  | 0 | 0            | 0 | 0.004251328  | 0 |

|   |              |   |              |   |              |              |   |
|---|--------------|---|--------------|---|--------------|--------------|---|
| 0 | -1.1132676   | 0 | -0.13288678  | 0 | 0            | 0.019454505  | 0 |
| 0 | -1.1066406   | 0 | -0.030644004 | 0 | -0.098862753 | 0.01513654   | 0 |
| 0 | 0            | 0 | -0.008862447 | 0 | -0.1357657   | 0.00158223   | 0 |
| 0 | -0.021213604 | 0 | 0            | 0 | -0.13321445  | -0.01426166  | 0 |
| 0 | -1.1537562   | 0 | -0.014166261 | 0 | -0.12614095  | 0.032310607  | 0 |
| 0 | 0            | 0 | -0.14708927  | 0 | 0            | -0.000544634 | 0 |
| 0 | -0.016570354 | 0 | -0.005595164 | 0 | -0.1284562   | 0            | 0 |
| 0 | 0            | 0 | 0            | 0 | -0.13308038  | -0.01228032  | 0 |
| 0 | 0            | 0 | -0.004879487 | 0 | -0.1283709   | -0.006028395 | 0 |
| 0 | 0            | 0 | -0.006784641 | 0 | -0.12640977  | -0.009629955 | 0 |
| 0 | 0            | 0 | -0.005569552 | 0 | -0.12823678  | 0            | 0 |
| 0 | -0.025700897 | 0 | -0.018304612 | 0 | -0.098687478 | -0.013674778 | 0 |
| 0 | -0.014359771 | 0 | -0.013035584 | 0 | -0.13169293  | -0.006780733 | 0 |
| 0 | 0            | 0 | -0.000753141 | 0 | -0.11854092  | -0.001350131 | 0 |
| 0 | 0            | 0 | -0.12701074  | 0 | 0            | -0.005393579 | 0 |
| 0 | 0            | 0 | -0.012309188 | 0 | -0.1313336   | -0.005411851 | 0 |
| 0 | 0            | 0 | -0.017975638 | 0 | -0.098342654 | -0.011829244 | 0 |
| 0 | -0.012877218 | 0 | -0.006708935 | 0 | -0.1286511   | -0.014828768 | 0 |
| 0 | 0            | 0 | -0.006512569 | 0 | -0.12857358  | -0.012781953 | 0 |
| 0 | -0.029614985 | 0 | -0.006184039 | 0 | -0.11351566  | -0.014635651 | 0 |
| 0 | -0.021368323 | 0 | -0.12718382  | 0 | 0            | -0.015572789 | 0 |
| 0 | 0            | 0 | -0.12703669  | 0 | 0            | -0.013593465 | 0 |
| 0 | -0.014034953 | 0 | -0.010795993 | 0 | -0.12214408  | -0.0168501   | 0 |
| 0 | 0            | 0 | -0.005816155 | 0 | -0.11300873  | -0.012696937 | 0 |
| 0 | 0            | 0 | -0.010440893 | 0 | -0.12238945  | -0.014749906 | 0 |
| 0 | -0.091694763 | 0 | -0.022733063 | 0 | -0.12865259  | 0.022478029  | 0 |
| 0 | -0.090154182 | 0 | 0            | 0 | -0.15170468  | 0.023659273  | 0 |
| 0 | -0.088920381 | 0 | -0.024743145 | 0 | -0.12923476  | 0.025704315  | 0 |
| 0 | -0.095997796 | 0 | -0.027297642 | 0 | -0.12417542  | 0            | 0 |
| 0 | -0.017298226 | 0 | -0.007405275 | 0 | -0.094891417 | -0.012335142 | 0 |
| 0 | 0            | 0 | -0.007197136 | 0 | -0.094670645 | -0.010455691 | 0 |
| 0 | 0            | 0 | -0.024791278 | 0 | -0.12631818  | 0.026578918  | 0 |
| 0 | 0            | 0 | 0            | 0 | -0.14923322  | 0.025147044  | 0 |
| 0 | 0            | 0 | -0.023276696 | 0 | -0.12532682  | 0.023636045  | 0 |
| 0 | -0.085939401 | 0 | -0.14652561  | 0 | 0            | 0.021714738  | 0 |
| 0 | 0            | 0 | -0.028141854 | 0 | -0.12081147  | 0            | 0 |
| 0 | 0            | 0 | -0.1441989   | 0 | 0            | 0.023229064  | 0 |
| 0 | -0.10715479  | 0 | -0.017289529 | 0 | -0.12370811  | 0.023917169  | 0 |
| 0 | -1.0125669   | 0 | 0            | 0 | 0            | 0            | 0 |
| 0 | -1.013974    | 0 | 0            | 0 | 0            | -0.014949893 | 0 |
| 0 | 0            | 0 | -0.02557119  | 0 | -0.11302411  | 0.030974877  | 0 |
| 0 | -1.0144714   | 0 | 0            | 0 | 0            | 0            | 0 |
| 0 | -1.0609729   | 0 | 0            | 0 | 0            | 0            | 0 |
| 0 | -1.012608    | 0 | 0            | 0 | 0            | -0.01397526  | 0 |
| 0 | -1.0115894   | 0 | 0            | 0 | 0            | 0            | 0 |
| 0 | -1.0124316   | 0 | 0            | 0 | 0            | -0.014793673 | 0 |
| 0 | -1.0608467   | 0 | 0            | 0 | 0            | -0.018245951 | 0 |

|   |              |   |              |   |              |   |              |   |
|---|--------------|---|--------------|---|--------------|---|--------------|---|
| 0 | -0.018324768 | 0 | -0.031221279 | 0 | -0.10704971  | 0 | 0.020980378  | 0 |
| 0 | 0            | 0 | -0.017624729 | 0 | -0.12045659  | 0 | 0.025450485  | 0 |
| 0 | -1.0607934   | 0 | 0            | 0 | 0            | 0 | -0.016957956 | 0 |
| 0 | 0            | 0 | -0.030746408 | 0 | -0.10657778  | 0 | 0.022720391  | 0 |
| 0 | -1.1407243   | 0 | -0.02528194  | 0 | -0.081743023 | 0 | 0.020100394  | 0 |
| 0 | -1.0583828   | 0 | 0            | 0 | 0            | 0 | -0.016453722 | 0 |
| 0 | -1.0140499   | 0 | 0            | 0 | 0            | 0 | 0            | 0 |
| 0 | -1.0138486   | 0 | 0            | 0 | 0            | 0 | -0.013466964 | 0 |
| 0 | -1.0171211   | 0 | 0            | 0 | 0            | 0 | -0.015578376 | 0 |
| 0 | -1.0188082   | 0 | 0            | 0 | 0            | 0 | -0.014174514 | 0 |
| 0 | -1.0635232   | 0 | 0            | 0 | 0            | 0 | -0.016223292 | 0 |
| 0 | -0.098805754 | 0 | 0            | 0 | 0            | 0 | 0            | 0 |
| 0 | -0.10116673  | 0 | 0            | 0 | 0            | 0 | -0.017345951 | 0 |
| 0 | -0.094507892 | 0 | 0            | 0 | 0            | 0 | -0.016189669 | 0 |
| 0 | 0            | 0 | 0            | 0 | 0            | 0 | 0            | 0 |
| 0 | -0.10428594  | 0 | 0            | 0 | 0            | 0 | -0.018945643 | 0 |
| 0 | -0.063821696 | 0 | 0            | 0 | 0            | 0 | -0.015673178 | 0 |
| 0 | 0            | 0 | 0            | 0 | 0            | 0 | -0.015650109 | 0 |
| 0 | 0            | 0 | 0            | 0 | 0            | 0 | -0.014470821 | 0 |
| 0 | 0            | 0 | 0            | 0 | 0            | 0 | -0.013900298 | 0 |
| 0 | 0            | 0 | 0            | 0 | 0            | 0 | -0.017249527 | 0 |
| 0 | 0            | 0 | 0            | 0 | 0            | 0 | -0.00579825  | 0 |
| 0 | -0.019931839 | 0 | 0            | 0 | 0            | 0 | -0.01531174  | 0 |
| 0 | 0            | 0 | 0            | 0 | 0            | 0 | -0.01350173  | 0 |
| 0 | -1.091241    | 0 | 0            | 0 | 0            | 0 | 0.009652113  | 0 |
| 0 | -1.0918226   | 0 | 0            | 0 | 0            | 0 | 0            | 0 |
| 0 | -1.0872519   | 0 | 0            | 0 | 0            | 0 | 0.007858922  | 0 |
| 0 | -1.0657889   | 0 | 0            | 0 | 0            | 0 | 0.013824472  | 0 |
| 0 | -1.0968924   | 0 | 0            | 0 | 0            | 0 | 0.013090775  | 0 |
| 0 | -1.1187148   | 0 | 0            | 0 | 0            | 0 | 0.018085324  | 0 |
| 0 | -0.013829031 | 0 | 0            | 0 | 0            | 0 | 0.009115467  | 0 |
| 0 | 0            | 0 | 0            | 0 | 0            | 0 | 0.009954623  | 0 |
| 0 | -1.0177278   | 0 | 0            | 0 | -0.14417956  | 0 | 0            | 0 |
| 0 | -1.0220695   | 0 | 0            | 0 | -0.14857262  | 0 | 0            | 0 |
| 0 | -1.0217342   | 0 | 0            | 0 | -0.14663384  | 0 | -0.008307205 | 0 |
| 0 | -1.0213815   | 0 | 0            | 0 | -0.14654325  | 0 | 0            | 0 |
| 0 | -1.0220763   | 0 | -0.005095639 | 0 | -0.14219354  | 0 | 0            | 0 |
| 0 | -1.0202364   | 0 | 0            | 0 | -0.13812109  | 0 | -0.009262128 | 0 |
| 0 | -1.0206263   | 0 | -0.003866561 | 0 | -0.13479071  | 0 | 0            | 0 |
| 0 | -1.0178298   | 0 | -0.13802012  | 0 | 0            | 0 | 0            | 0 |
| 0 | -1.0227754   | 0 | 0            | 0 | -0.13545344  | 0 | -0.007895337 | 0 |
| 0 | -1.023074    | 0 | 0.002745371  | 0 | -0.13851149  | 0 | 0            | 0 |
| 0 | -1.0226663   | 0 | -0.000629411 | 0 | -0.13424877  | 0 | -0.009041875 | 0 |
| 0 | -1.0221432   | 0 | -0.14139243  | 0 | 0            | 0 | 0            | 0 |
| 0 | -1.0217702   | 0 | -0.13986752  | 0 | 0            | 0 | -0.009676616 | 0 |
| 0 | -1.0212397   | 0 | -0.13966674  | 0 | 0            | 0 | 0            | 0 |
| 0 | -1.0201564   | 0 | -0.13259293  | 0 | 0            | 0 | -0.010512553 | 0 |



|   |             |   |              |   |              |              |              |
|---|-------------|---|--------------|---|--------------|--------------|--------------|
| 0 | -1.0226945  | 0 | -0.12946917  | 0 | 0            | -0.009248082 | 0            |
| 0 | -1.0929395  | 0 | 0            | 0 | -0.13506075  | 0            | -0.01129636  |
| 0 | -1.0954238  | 0 | 0            | 0 | -0.13796454  | 0            | 0            |
| 0 | -1.0947604  | 0 | 0.004029516  | 0 | -0.13946114  | 0            | 0            |
| 0 | -1.0230669  | 0 | 0            | 0 | -0.14461787  | 0            | 0            |
| 0 | -1.0956878  | 0 | 0            | 0 | -0.13909443  | 0            | -0.011643268 |
| 0 | -1.0975974  | 0 | 0.003947113  | 0 | -0.14347927  | 0            | 0            |
| 0 | -1.0656862  | 0 | -0.017737897 | 0 | -0.14725156  | 0            | 0.006845747  |
| 0 | -1.0665662  | 0 | 0            | 0 | -0.16501436  | 0            | 0.007498932  |
| 0 | -1.0959928  | 0 | 0            | 0 | -0.13704017  | 0            | -0.013286582 |
| 0 | -1.0658303  | 0 | 0            | 0 | -0.16451065  | 0            | 0.007029374  |
| 0 | -1.0961935  | 0 | -9.79E-05    | 0 | -0.13734349  | 0            | -0.013159296 |
| 0 | -1.026976   | 0 | 0            | 0 | -0.14595992  | 0            | -0.006928197 |
| 0 | -1.067745   | 0 | -0.01888803  | 0 | -0.14676706  | 0            | 0            |
| 0 | -1.0672648  | 0 | -0.018923528 | 0 | -0.14643426  | 0            | 0            |
| 0 | -1.0680909  | 0 | 0            | 0 | -0.16518001  | 0            | 0            |
| 0 | -1.0272889  | 0 | -0.013043846 | 0 | -0.1337951   | 0            | 0            |
| 0 | -1.0982939  | 0 | 0.000965311  | 0 | -0.13858865  | 0            | 0            |
| 0 | -1.0944668  | 0 | 0.007151111  | 0 | -0.13477706  | 0            | -0.012356717 |
| 0 | -1.0947131  | 0 | 0.001113994  | 0 | -0.13070806  | 0            | -0.013972713 |
| 0 | -1.0922413  | 0 | -0.12893881  | 0 | 0            | 0            | -0.01263346  |
| 0 | -1.0228732  | 0 | -0.13854148  | 0 | 0            | 0            | 0            |
| 0 | -1.0214568  | 0 | 0            | 0 | -0.12920877  | 0            | -0.006781531 |
| 0 | -1.0947026  | 0 | -0.13085354  | 0 | 0            | 0            | 0            |
| 0 | -1.0265155  | 0 | 0            | 0 | -0.14358018  | 0            | -0.008783383 |
| 0 | -1.0271075  | 0 | -0.017278107 | 0 | -0.12736041  | 0            | -0.008744147 |
| 0 | -1.0217258  | 0 | -0.012475149 | 0 | -0.11752095  | 0            | 0            |
| 0 | -1.026935   | 0 | -0.016962286 | 0 | -0.12772362  | 0            | 0            |
| 0 | -1.100959   | 0 | -0.011053376 | 0 | -0.144444325 | 0            | 0            |
| 0 | -1.1009852  | 0 | 0            | 0 | -0.15513091  | 0            | 0.001364588  |
| 0 | -1.1012674  | 0 | -0.009726482 | 0 | -0.14495627  | 0            | 0.000260187  |
| 0 | -1.0948328  | 0 | -0.13199593  | 0 | 0            | 0            | -0.01305275  |
| 0 | -1.101015   | 0 | -0.009916301 | 0 | -0.1426582   | 0            | -0.001482377 |
| 0 | -0.11472154 | 0 | 0            | 0 | -0.14560472  | 0            | -0.008220984 |
| 0 | -0.11016357 | 0 | 0            | 0 | -0.1469788   | 0            | 0            |
| 0 | -1.0268561  | 0 | -0.13979024  | 0 | 0            | 0            | -0.008410712 |
| 0 | -0.11216995 | 0 | -0.001331458 | 0 | -0.14479617  | 0            | 0            |
| 0 | -1.0950587  | 0 | -0.13023409  | 0 | 0            | 0            | -0.014592905 |
| 0 | -1.0595067  | 0 | -0.022324096 | 0 | -0.13770495  | 0            | 0            |
| 0 | -1.0588419  | 0 | 0            | 0 | -0.15925845  | 0            | 0.00445799   |
| 0 | -1.0568815  | 0 | -0.020760825 | 0 | -0.13833224  | 0            | 0.003012057  |
| 0 | -1.0666215  | 0 | -0.15802779  | 0 | 0            | 0            | 0.00578628   |
| 0 | -1.0668293  | 0 | -0.15822053  | 0 | 0            | 0            | 0.005887901  |
| 0 | -1.0213639  | 0 | -0.12502838  | 0 | 0            | 0            | -0.00805064  |
| 0 | -1.0533643  | 0 | -0.021901356 | 0 | -0.13470763  | 0            | 0.000935024  |
| 0 | -1.0682184  | 0 | -0.15850432  | 0 | 0            | 0            | 0            |
| 0 | -1.0261874  | 0 | -0.13782374  | 0 | 0            | 0            | -0.010137035 |

|   |              |   |              |   |              |   |              |   |
|---|--------------|---|--------------|---|--------------|---|--------------|---|
| 0 | -0.10577432  | 0 | 0            | 0 | -0.14826552  | 0 | -0.008818476 | 0 |
| 0 | -0.10291173  | 0 | -0.000664732 | 0 | -0.14818673  | 0 | 0            | 0 |
| 0 | -0.11003301  | 0 | 0            | 0 | -0.14599137  | 0 | -0.010414635 | 0 |
| 0 | -0.10777438  | 0 | -0.004116177 | 0 | -0.14283877  | 0 | -0.010191756 | 0 |
| 0 | -0.10658029  | 0 | -0.004004264 | 0 | -0.14276123  | 0 | 0            | 0 |
| 0 | -1.1004009   | 0 | -0.14865342  | 0 | 0            | 0 | 0.00013068   | 0 |
| 0 | -1.098488    | 0 | 0            | 0 | -0.13516283  | 0 | -0.011231136 | 0 |
| 0 | -0.12278548  | 0 | -0.003732162 | 0 | -0.13642679  | 0 | -0.010990696 | 0 |
| 0 | 0            | 0 | 0            | 0 | -0.14636693  | 0 | 0            | 0 |
| 0 | 0            | 0 | 0            | 0 | -0.14348832  | 0 | -0.006649515 | 0 |
| 0 | 0            | 0 | -0.002141287 | 0 | -0.14179242  | 0 | 0            | 0 |
| 0 | -1.1004755   | 0 | -0.00710643  | 0 | -0.12881085  | 0 | 0            | 0 |
| 0 | -0.10986642  | 0 | -0.13929369  | 0 | 0            | 0 | -0.009705288 | 0 |
| 0 | -0.12790949  | 0 | 0.00273819   | 0 | -0.14016718  | 0 | -0.009592518 | 0 |
| 0 | -1.059763    | 0 | -0.1534984   | 0 | 0            | 0 | 0.003223331  | 0 |
| 0 | -0.10687888  | 0 | -0.13974078  | 0 | 0            | 0 | 0            | 0 |
| 0 | -1.1016912   | 0 | -0.013407532 | 0 | -0.13186901  | 0 | -0.004702543 | 0 |
| 0 | -1.1009883   | 0 | -0.007919503 | 0 | -0.12925662  | 0 | -0.011729687 | 0 |
| 0 | 0            | 0 | 0            | 0 | -0.14770621  | 0 | -0.007142745 | 0 |
| 0 | 0            | 0 | -0.00206369  | 0 | -0.14616719  | 0 | 0            | 0 |
| 0 | -0.10270023  | 0 | -0.14094149  | 0 | 0            | 0 | -0.010366738 | 0 |
| 0 | 0            | 0 | 0            | 0 | -0.14553196  | 0 | -0.008744395 | 0 |
| 0 | 0            | 0 | -0.00541159  | 0 | -0.14098097  | 0 | -0.008569649 | 0 |
| 0 | -1.0976255   | 0 | -0.12912545  | 0 | 0            | 0 | -0.012563066 | 0 |
| 0 | 0            | 0 | -0.005304852 | 0 | -0.14093932  | 0 | 0            | 0 |
| 0 | -0.10733143  | 0 | -0.1390143   | 0 | 0            | 0 | -0.011841631 | 0 |
| 0 | -1.096512    | 0 | -0.00725016  | 0 | -0.11354461  | 0 | -0.011666124 | 0 |
| 0 | -1.1017045   | 0 | -0.011783731 | 0 | -0.12318674  | 0 | -0.013669001 | 0 |
| 0 | 0            | 0 | -0.00438416  | 0 | -0.13347727  | 0 | -0.009520505 | 0 |
| 0 | 0            | 0 | -0.13731002  | 0 | 0            | 0 | -0.008100738 | 0 |
| 0 | 0            | 0 | -0.1393109   | 0 | 0            | 0 | 0            | 0 |
| 0 | -1.0269613   | 0 | -0.018261412 | 0 | -0.098608962 | 0 | -0.011577962 | 0 |
| 0 | 0            | 0 | 0.00236923   | 0 | -0.13727189  | 0 | -0.008115446 | 0 |
| 0 | 0            | 0 | -0.14050513  | 0 | 0            | 0 | -0.008675079 | 0 |
| 0 | 0            | 0 | -0.13866956  | 0 | 0            | 0 | -0.010160807 | 0 |
| 0 | 0            | 0 | -0.010103297 | 0 | -0.13396822  | 0 | 0            | 0 |
| 0 | 0            | 0 | 0            | 0 | -0.14390782  | 0 | 0.001958597  | 0 |
| 0 | -0.11376954  | 0 | 0.004769879  | 0 | -0.14030784  | 0 | -0.013963554 | 0 |
| 0 | -0.11291829  | 0 | 0            | 0 | -0.13602876  | 0 | -0.013991572 | 0 |
| 0 | -0.1085592   | 0 | 0.006317364  | 0 | -0.14279473  | 0 | 0            | 0 |
| 0 | 0            | 0 | -0.008942132 | 0 | -0.13657417  | 0 | 0.001024105  | 0 |
| 0 | -1.1171207   | 0 | 0            | 0 | -0.14918977  | 0 | 0.023197619  | 0 |
| 0 | -0.022350567 | 0 | 0            | 0 | -0.1438288   | 0 | -0.008347361 | 0 |
| 0 | -1.1147294   | 0 | -0.022284521 | 0 | -0.12594751  | 0 | 0.021412272  | 0 |
| 0 | -0.019687835 | 0 | -0.013456802 | 0 | -0.13136113  | 0 | 0            | 0 |
| 0 | -1.1069122   | 0 | -0.025808177 | 0 | -0.12691523  | 0 | 0.027034004  | 0 |
| 0 | 0            | 0 | 0            | 0 | -0.14371356  | 0 | -0.006556182 | 0 |

|   |              |   |              |   |              |   |              |   |
|---|--------------|---|--------------|---|--------------|---|--------------|---|
| 0 | 0            | 0 | -0.013412743 | 0 | -0.13115746  | 0 | 0            | 0 |
| 0 | -0.1066056   | 0 | 0.005360126  | 0 | -0.14302121  | 0 | -0.014426055 | 0 |
| 0 | 0            | 0 | -0.013736403 | 0 | -0.13023429  | 0 | -0.003557816 | 0 |
| 0 | 0            | 0 | -0.012036551 | 0 | -0.13185371  | 0 | -0.000370038 | 0 |
| 0 | -1.1247062   | 0 | -0.02679744  | 0 | -0.12215985  | 0 | 0            | 0 |
| 0 | -0.11026598  | 0 | 0.002118146  | 0 | -0.13766419  | 0 | -0.016114062 | 0 |
| 0 | 0            | 0 | -0.007707989 | 0 | -0.12148694  | 0 | 0.004428096  | 0 |
| 0 | 0            | 0 | -0.13743631  | 0 | 0            | 0 | 0.000261094  | 0 |
| 0 | -0.058853297 | 0 | -0.01808053  | 0 | -0.15034412  | 0 | 0.007605246  | 0 |
| 0 | -0.058856383 | 0 | -0.01798243  | 0 | -0.15041036  | 0 | 0.007527854  | 0 |
| 0 | -0.058899288 | 0 | 0            | 0 | -0.16793033  | 0 | 0.007801211  | 0 |
| 0 | -0.013288777 | 0 | -0.0135867   | 0 | -0.13261844  | 0 | -0.009129869 | 0 |
| 0 | -0.059924618 | 0 | -0.01934546  | 0 | -0.14920143  | 0 | 0            | 0 |
| 0 | -1.035379    | 0 | -0.007615397 | 0 | -0.095064962 | 0 | -0.010202773 | 0 |
| 0 | 0            | 0 | 0            | 0 | -0.13539219  | 0 | -0.012278786 | 0 |
| 0 | 0            | 0 | -0.013433403 | 0 | -0.1325164   | 0 | -0.007249278 | 0 |
| 0 | -0.11029659  | 0 | -0.12885211  | 0 | 0            | 0 | -0.015362456 | 0 |
| 0 | 0            | 0 | 0.004142636  | 0 | -0.13726438  | 0 | -0.012305651 | 0 |
| 0 | -1.115685    | 0 | -0.1440884   | 0 | 0            | 0 | 0.021283513  | 0 |
| 0 | -0.031057044 | 0 | -0.013145077 | 0 | -0.11685255  | 0 | -0.008851004 | 0 |
| 0 | -0.022528722 | 0 | -0.13777433  | 0 | 0            | 0 | -0.009809944 | 0 |
| 0 | 0            | 0 | 0.004919423  | 0 | -0.14072887  | 0 | 0            | 0 |
| 0 | 0            | 0 | -0.13763802  | 0 | 0            | 0 | -0.00799044  | 0 |
| 0 | -0.015090508 | 0 | -0.01788942  | 0 | -0.125865    | 0 | -0.011066394 | 0 |
| 0 | 0            | 0 | -0.012865818 | 0 | -0.11634067  | 0 | -0.007072458 | 0 |
| 0 | 0            | 0 | -0.018305188 | 0 | -0.14826353  | 0 | 0.008334898  | 0 |
| 0 | 0            | 0 | -0.018382616 | 0 | -0.14794595  | 0 | 0.008101876  | 0 |
| 0 | 0            | 0 | 0            | 0 | -0.16610254  | 0 | 0.008624604  | 0 |
| 0 | 0            | 0 | -0.017545219 | 0 | -0.12609856  | 0 | -0.00914403  | 0 |
| 0 | 0            | 0 | 0.004115415  | 0 | -0.14107259  | 0 | -0.012672488 | 0 |
| 0 | 0            | 0 | -0.019822133 | 0 | -0.14691981  | 0 | 0            | 0 |
| 0 | 0            | 0 | 0.000964971  | 0 | -0.13591879  | 0 | -0.014363299 | 0 |
| 0 | -0.071928647 | 0 | -0.009919745 | 0 | -0.14667768  | 0 | 0.000271111  | 0 |
| 0 | 0            | 0 | -0.019179796 | 0 | -0.14275793  | 0 | 0.010355583  | 0 |
| 0 | 0            | 0 | -0.12834633  | 0 | 0            | 0 | -0.013635323 | 0 |
| 0 | -0.055285034 | 0 | -0.16108944  | 0 | 0            | 0 | 0.006258213  | 0 |
| 0 | -0.008725492 | 0 | -0.02273338  | 0 | -0.13910374  | 0 | 0.003774992  | 0 |
| 0 | 0            | 0 | -0.022195477 | 0 | -0.1389241   | 0 | 0.005286622  | 0 |
| 0 | -1.1326432   | 0 | -0.016846184 | 0 | -0.12157721  | 0 | 0.023465789  | 0 |
| 0 | 0            | 0 | -0.009621674 | 0 | -0.14416638  | 0 | 0.000538734  | 0 |
| 0 | 0            | 0 | -0.1593665   | 0 | 0            | 0 | 0.00709726   | 0 |
| 0 | -1.1141494   | 0 | -0.029815302 | 0 | -0.10737536  | 0 | 0.020773048  | 0 |
| 0 | 0            | 0 | -0.002729055 | 0 | -0.13077399  | 0 | -0.0038683   | 0 |
| 0 | -0.021229332 | 0 | -0.007270634 | 0 | -0.12617545  | 0 | -0.014312968 | 0 |
| 0 | 0            | 0 | -0.007064113 | 0 | -0.12623758  | 0 | -0.012332479 | 0 |
| 0 | -0.090031017 | 0 | -0.022832848 | 0 | -0.12953084  | 0 | 0.023406421  | 0 |
| 0 | 0            | 0 | -0.023382919 | 0 | -0.12652568  | 0 | 0.024888663  | 0 |

|   |             |   |              |             |             |              |              |
|---|-------------|---|--------------|-------------|-------------|--------------|--------------|
| 0 | -1.0095517  | 0 | 0            | 0           | 0           | 0            | 0            |
| 0 | -1.0119714  | 0 | 0            | 0           | 0           | -0.015425003 | 0            |
| 0 | -1.0139666  | 0 | 0            | 0           | 0           | -0.014264144 | 0            |
| 0 | -1.0584297  | 0 | 0            | 0           | 0           | -0.016308982 | 0            |
| 0 | -1.0111953  | 0 | 0            | 0           | 0           | -0.013714131 | 0            |
| 0 | -1.0136395  | 0 | 0            | 0           | 0           | -0.013319121 | 0            |
| 0 | -0.10371917 | 0 | 0            | 0           | 0           | -0.01527887  | 0            |
| 0 | 0           | 0 | 0            | 0           | 0           | -0.013626763 | 0            |
| 0 | -1.0903489  | 0 | 0            | 0           | 0           | 0.009009916  | 0            |
| 0 | -1.0182578  | 0 | 0            | -0.14687931 | 0           | 0            | 0            |
| 0 | -1.0175095  | 0 | 0            | -0.14380569 | 0           | -0.00644429  | 0            |
| 0 | -1.0177287  | 0 | -0.002564009 | 0           | -0.14169056 | 0            | 0            |
| 0 | -1.0218048  | 0 | 0            | 0           | -0.1481314  | 0            | -0.006909021 |
| 0 | -1.022082   | 0 | -0.002562143 | 0           | -0.14609498 | 0            | 0            |
| 0 | -1.0210238  | 0 | 0            | 0           | -0.14602065 | 0            | -0.008494298 |
| 0 | -1.0217604  | 0 | -0.005891434 | 0           | -0.14093829 | 0            | -0.008343036 |
| 0 | -1.0214043  | 0 | -0.005732999 | 0           | -0.14099877 | 0            | 0            |
| 0 | -1.0202463  | 0 | -0.004817738 | 0           | -0.13344855 | 0            | -0.009294162 |
| 0 | -1.0175738  | 0 | -0.13764282  | 0           | 0           | 0            | -0.007897282 |
| 0 | -1.0181884  | 0 | -0.13979289  | 0           | 0           | 0            | 0            |
| 0 | -1.0227662  | 0 | 0.001870484  | 0           | -0.13727219 | 0            | -0.007882001 |
| 0 | -1.021823   | 0 | -0.14095203  | 0           | 0           | 0            | -0.008446156 |
| 0 | -1.0208318  | 0 | -0.13916702  | 0           | 0           | 0            | -0.009914663 |
| 0 | -1.0935406  | 0 | 0            | 0           | -0.13743756 | 0            | -0.011231911 |
| 0 | -1.0929015  | 0 | 0.002707393  | 0           | -0.13769113 | 0            | -0.011276131 |
| 0 | -1.0953704  | 0 | 0.003291581  | 0           | -0.14115233 | 0            | 0            |
| 0 | -1.0228128  | 0 | 0            | 0           | -0.14421617 | 0            | -0.006353152 |
| 0 | -1.0231135  | 0 | -0.013778065 | 0           | -0.13129923 | 0            | 0            |
| 0 | -1.0956492  | 0 | 0.002591527  | 0           | -0.1416048  | 0            | -0.011624052 |
| 0 | -1.0664107  | 0 | -0.017541837 | 0           | -0.14795524 | 0            | 0.007304213  |
| 0 | -1.0656902  | 0 | -0.017709227 | 0           | -0.14729205 | 0            | 0.006845327  |
| 0 | -1.0668177  | 0 | 0            | 0           | -0.16510233 | 0            | 0.00770329   |
| 0 | -1.096      | 0 | -0.000504137 | 0           | -0.13655178 | 0            | -0.013290109 |
| 0 | -1.0269875  | 0 | -0.013835942 | 0           | -0.13257928 | 0            | -0.007016535 |
| 0 | -1.0679149  | 0 | -0.019029885 | 0           | -0.14667968 | 0            | 0            |
| 0 | -1.0926227  | 0 | -0.13040809  | 0           | 0           | 0            | -0.012606597 |
| 0 | -1.0226103  | 0 | -0.13814652  | 0           | 0           | 0            | -0.007791378 |
| 0 | -1.0266178  | 0 | -0.017824401 | 0           | -0.12633715 | 0            | -0.00889733  |
| 0 | -1.021488   | 0 | -0.013192274 | 0           | -0.11643791 | 0            | -0.006870962 |
| 0 | -1.1011049  | 0 | -0.010768312 | 0           | -0.14460469 | 0            | 0.001218126  |
| 0 | -0.1127637  | 0 | 0            | 0           | -0.14646846 | 0            | -0.008199121 |
| 0 | -0.1147025  | 0 | -0.002206184 | 0           | -0.14346397 | 0            | -0.008236012 |
| 0 | -0.11013964 | 0 | -0.001606247 | 0           | -0.14542567 | 0            | 0            |
| 0 | -1.0587135  | 0 | -0.021705126 | 0           | -0.13818607 | 0            | 0.004252403  |
| 0 | -1.0672246  | 0 | -0.15836747  | 0           | 0           | 0            | 0.006186216  |
| 0 | -0.10574962 | 0 | -0.001600006 | 0           | -0.1467176  | 0            | -0.008829288 |
| 0 | -0.10995632 | 0 | -0.00504453  | 0           | -0.14111229 | 0            | -0.010444069 |

|   |              |   |              |   |             |   |              |   |
|---|--------------|---|--------------|---|-------------|---|--------------|---|
| 0 | -1.0986029   | 0 | -0.008419616 | 0 | -0.12701011 | 0 | -0.011293568 | 0 |
| 0 | 0            | 0 | 0            | 0 | -0.1460031  | 0 | -0.006573207 | 0 |
| 0 | 0            | 0 | -0.002935228 | 0 | -0.14357374 | 0 | 0            | 0 |
| 0 | 0            | 0 | -0.002865273 | 0 | -0.14070892 | 0 | -0.006671051 | 0 |
| 0 | -0.10997139  | 0 | -0.13924894  | 0 | 0           | 0 | -0.009706037 | 0 |
| 0 | 0            | 0 | -0.002809937 | 0 | -0.14497978 | 0 | -0.007148579 | 0 |
| 0 | 0            | 0 | -0.006174203 | 0 | -0.13955835 | 0 | -0.008783411 | 0 |
| 0 | 0            | 0 | -0.13890221  | 0 | 0           | 0 | -0.008066342 | 0 |
| 0 | 0            | 0 | -0.009862155 | 0 | -0.13433645 | 0 | 0.001877739  | 0 |
| 0 | -0.11298457  | 0 | 0.004675108  | 0 | -0.14055719 | 0 | -0.013957334 | 0 |
| 0 | -1.1168816   | 0 | -0.022416648 | 0 | -0.12742042 | 0 | 0.022949538  | 0 |
| 0 | -0.022394087 | 0 | -0.014298237 | 0 | -0.13006481 | 0 | -0.008464311 | 0 |
| 0 | 0            | 0 | -0.014109637 | 0 | -0.13006936 | 0 | -0.006649597 | 0 |
| 0 | -0.058835408 | 0 | -0.018081045 | 0 | -0.15035406 | 0 | 0.007617988  | 0 |
| 0 | 0            | 0 | 0.00349597   | 0 | -0.13877918 | 0 | -0.012252204 | 0 |
| 0 | 0            | 0 | -0.018413038 | 0 | -0.1482052  | 0 | 0.008438709  | 0 |
| 0 | -1.0091324   | 0 | 0            | 0 | 0           | 0 | -0.013440649 | 0 |
| 0 | -1.0180356   | 0 | 0            | 0 | -0.14648295 | 0 | -0.006362927 | 0 |
| 0 | -1.0182683   | 0 | -0.003391798 | 0 | -0.14359613 | 0 | 0            | 0 |
| 0 | -1.0176819   | 0 | -0.003287408 | 0 | -0.14062471 | 0 | -0.006493905 | 0 |
| 0 | -1.0217841   | 0 | -0.00328336  | 0 | -0.14495479 | 0 | -0.0069282   | 0 |
| 0 | -1.0210705   | 0 | -0.006667077 | 0 | -0.13956751 | 0 | -0.008536545 | 0 |
| 0 | -1.0179198   | 0 | -0.13939449  | 0 | 0           | 0 | -0.007859932 | 0 |
| 0 | -1.0935981   | 0 | 0.001863018  | 0 | -0.13925615 | 0 | -0.01122302  | 0 |
| 0 | -1.0228832   | 0 | -0.014495923 | 0 | -0.1301984  | 0 | -0.006452461 | 0 |
| 0 | -1.0666903   | 0 | -0.017772283 | 0 | -0.1478279  | 0 | 0.007525307  | 0 |
| 0 | -0.11270134  | 0 | -0.002428722 | 0 | -0.14411157 | 0 | -0.008208607 | 0 |
| 0 | 0            | 0 | -0.0036167   | 0 | -0.14250389 | 0 | -0.006591289 | 0 |
| 0 | -1.0180547   | 0 | -0.004071835 | 0 | -0.14254316 | 0 | -0.00639022  | 0 |

SUPPLEMENTARY TABLE 7

| Model    | BIC     | Loglike  | H2r       | SE | bsnp_rs2938864 | SE | bsnp_rs1001646 |
|----------|---------|----------|-----------|----|----------------|----|----------------|
| cov0     | 0       | -227.149 | 0.372704  | 0  | 0              | 0  | 0              |
| cov9     | 4.3123  | -225.795 | 0.3701944 | 0  | 0              | 0  | 0              |
| cov10    | 4.3266  | -225.802 | 0.3706997 | 0  | 0              | 0  | 0              |
| cov3     | 4.7989  | -226.038 | 0.3668976 | 0  | 0              | 0  | 0              |
| cov1     | 4.933   | -226.105 | 0.3716411 | 0  | -0.050935257   | 0  | 0              |
| cov2     | 5.6548  | -226.466 | 0.373105  | 0  | 0              | 0  | -0.040725921   |
| cov6     | 6.4283  | -226.853 | 0.3727161 | 0  | 0              | 0  | 0              |
| cov11    | 6.723   | -227     | 0.3713302 | 0  | 0              | 0  | 0              |
| cov5     | 6.9273  | -227.102 | 0.3724024 | 0  | 0              | 0  | 0              |
| cov7     | 6.9711  | -227.124 | 0.373258  | 0  | 0              | 0  | 0              |
| cov8     | 6.9884  | -227.133 | 0.3731517 | 0  | 0              | 0  | 0              |
| cov4     | 7.0198  | -227.149 | 0.3727212 | 0  | 0              | 0  | 0              |
| cov1_5   | 8.3152  | -224.286 | 0.3736679 | 0  | -0.16803053    | 0  | 0              |
| cov1_4   | 9.3785  | -224.818 | 0.372682  | 0  | -0.11251736    | 0  | 0              |
| cov3_9   | 10.0477 | -225.153 | 0.366488  | 0  | 0              | 0  | 0              |
| cov3_10  | 10.0885 | -225.173 | 0.366947  | 0  | 0              | 0  | 0              |
| cov2_4   | 10.0975 | -225.177 | 0.3766971 | 0  | 0              | 0  | -0.11597477    |
| cov1_6   | 10.1446 | -225.201 | 0.3694756 | 0  | -0.1566975     | 0  | 0              |
| cov1_3   | 10.228  | -225.243 | 0.3664635 | 0  | -0.044780565   | 0  | 0              |
| cov3_8   | 10.6013 | -225.429 | 0.3595119 | 0  | 0              | 0  | 0              |
| cov1_10  | 10.6527 | -225.455 | 0.3706591 | 0  | -0.03233146    | 0  | 0              |
| cov1_9   | 10.6905 | -225.474 | 0.3702914 | 0  | -0.031448139   | 0  | 0              |
| cov3_7   | 10.7043 | -225.481 | 0.3597964 | 0  | 0              | 0  | 0              |
| cov2_3   | 10.8526 | -225.555 | 0.3676205 | 0  | 0              | 0  | -0.034495066   |
| cov2_10  | 10.9961 | -225.627 | 0.3713842 | 0  | 0              | 0  | -0.022270407   |
| cov2_9   | 11.0065 | -225.632 | 0.3709333 | 0  | 0              | 0  | -0.021593756   |
| cov1_11  | 11.1863 | -225.722 | 0.374417  | 0  | -0.087805112   | 0  | 0              |
| cov7_9   | 11.1936 | -225.725 | 0.3711301 | 0  | 0              | 0  | 0              |
| cov7_10  | 11.2061 | -225.732 | 0.3716466 | 0  | 0              | 0  | 0              |
| cov8_9   | 11.2225 | -225.74  | 0.3710301 | 0  | 0              | 0  | 0              |
| cov8_10  | 11.2352 | -225.746 | 0.3715463 | 0  | 0              | 0  | 0              |
| cov4_9   | 11.2445 | -225.751 | 0.3703674 | 0  | 0              | 0  | 0              |
| cov4_10  | 11.2759 | -225.767 | 0.3708727 | 0  | 0              | 0  | 0              |
| cov9_10  | 11.3041 | -225.781 | 0.3704024 | 0  | 0              | 0  | 0              |
| cov5_9   | 11.3312 | -225.794 | 0.370166  | 0  | 0              | 0  | 0              |
| cov9_11  | 11.3319 | -225.795 | 0.3701495 | 0  | 0              | 0  | 0              |
| cov6_9   | 11.332  | -225.795 | 0.3702157 | 0  | 0              | 0  | 0              |
| cov5_10  | 11.3404 | -225.799 | 0.3706306 | 0  | 0              | 0  | 0              |
| cov10_11 | 11.343  | -225.8   | 0.3705754 | 0  | 0              | 0  | 0              |
| cov6_10  | 11.343  | -225.8   | 0.3707468 | 0  | 0              | 0  | 0              |
| cov3_6   | 11.4854 | -225.871 | 0.3671369 | 0  | 0              | 0  | 0              |
| cov3_5   | 11.6158 | -225.937 | 0.366111  | 0  | 0              | 0  | 0              |
| cov3_4   | 11.771  | -226.014 | 0.3665118 | 0  | 0              | 0  | 0              |
| cov3_11  | 11.7752 | -226.016 | 0.3665301 | 0  | 0              | 0  | 0              |
| cov1_7   | 11.8473 | -226.052 | 0.3723412 | 0  | -0.051759031   | 0  | 0              |

|           |         |          |           |   |              |   |              |
|-----------|---------|----------|-----------|---|--------------|---|--------------|
| cov1_8    | 11.8741 | -226.066 | 0.3722502 | 0 | -0.051643897 | 0 | 0            |
| cov1_2    | 11.9411 | -226.099 | 0.3714416 | 0 | -0.057149143 | 0 | 0.007233494  |
| cov2_5    | 11.945  | -226.101 | 0.3748664 | 0 | 0            | 0 | -0.074179385 |
| cov2_11   | 12.5583 | -226.408 | 0.3744281 | 0 | 0            | 0 | -0.051797692 |
| cov2_7    | 12.5962 | -226.427 | 0.3737508 | 0 | 0            | 0 | -0.04121919  |
| cov2_6    | 12.6188 | -226.438 | 0.3731879 | 0 | 0            | 0 | -0.051167408 |
| cov2_8    | 12.6188 | -226.438 | 0.3736532 | 0 | 0            | 0 | -0.041142179 |
| cov4_6    | 12.8908 | -226.574 | 0.3735769 | 0 | 0            | 0 | 0            |
| cov5_6    | 13.2047 | -226.731 | 0.3735577 | 0 | 0            | 0 | 0            |
| cov6_7    | 13.3807 | -226.819 | 0.3733294 | 0 | 0            | 0 | 0            |
| cov6_8    | 13.4002 | -226.829 | 0.3732364 | 0 | 0            | 0 | 0            |
| cov6_11   | 13.4482 | -226.853 | 0.3727767 | 0 | 0            | 0 | 0            |
| cov1_5_6  | 13.4738 | -223.356 | 0.3715963 | 0 | -0.27590385  | 0 | 0            |
| cov4_11   | 13.5897 | -226.924 | 0.3711079 | 0 | 0            | 0 | 0            |
| cov4_5    | 13.637  | -226.947 | 0.3724279 | 0 | 0            | 0 | 0            |
| cov7_11   | 13.7206 | -226.989 | 0.3717474 | 0 | 0            | 0 | 0            |
| cov8_11   | 13.7317 | -226.995 | 0.3716287 | 0 | 0            | 0 | 0            |
| cov7_8    | 13.7348 | -226.996 | 0.3731343 | 0 | 0            | 0 | 0            |
| cov5_11   | 13.737  | -226.997 | 0.3712633 | 0 | 0            | 0 | 0            |
| cov5_7    | 13.8947 | -227.076 | 0.3729549 | 0 | 0            | 0 | 0            |
| cov5_8    | 13.9129 | -227.085 | 0.3728523 | 0 | 0            | 0 | 0            |
| cov4_7    | 13.9912 | -227.124 | 0.3732534 | 0 | 0            | 0 | 0            |
| cov4_8    | 14.0086 | -227.133 | 0.3731504 | 0 | 0            | 0 | 0            |
| cov1_5_11 | 14.5841 | -223.911 | 0.376213  | 0 | -0.20424375  | 0 | 0            |
| cov1_4_6  | 14.7485 | -223.993 | 0.3710363 | 0 | -0.21157733  | 0 | 0            |
| cov1_3_5  | 15.0266 | -224.132 | 0.3712428 | 0 | -0.14908887  | 0 | 0            |
| cov1_5_7  | 15.1213 | -224.179 | 0.3747991 | 0 | -0.17125388  | 0 | 0            |
| cov1_4_5  | 15.1278 | -224.182 | 0.3736722 | 0 | -0.16662798  | 0 | 0            |
| cov1_5_8  | 15.1588 | -224.198 | 0.374701  | 0 | -0.17097753  | 0 | 0            |
| cov1_5_9  | 15.2885 | -224.263 | 0.3733551 | 0 | -0.15624113  | 0 | 0            |
| cov1_5_10 | 15.2899 | -224.264 | 0.3734392 | 0 | -0.15642316  | 0 | 0            |
| cov1_3_6  | 15.3209 | -224.279 | 0.3640948 | 0 | -0.15361349  | 0 | 0            |
| cov1_2_5  | 15.3343 | -224.286 | 0.3735985 | 0 | -0.16986473  | 0 | 0.00223401   |
| cov1_6_10 | 15.3593 | -224.298 | 0.3681858 | 0 | -0.1495185   | 0 | 0            |
| cov1_6_9  | 15.3911 | -224.314 | 0.3677414 | 0 | -0.1485251   | 0 | 0            |
| cov1_4_11 | 15.5963 | -224.417 | 0.3754231 | 0 | -0.15063351  | 0 | 0            |
| cov1_2_4  | 15.7766 | -224.507 | 0.3748135 | 0 | -0.078423285 | 0 | -0.059802496 |
| cov1_3_4  | 15.8193 | -224.528 | 0.3693587 | 0 | -0.096627776 | 0 | 0            |
| cov1_4_10 | 15.8422 | -224.54  | 0.3719981 | 0 | -0.092123936 | 0 | 0            |
| cov1_4_9  | 15.8686 | -224.553 | 0.3717567 | 0 | -0.091821155 | 0 | 0            |
| cov1_3_11 | 15.8887 | -224.563 | 0.3692754 | 0 | -0.093673953 | 0 | 0            |
| cov2_4_9  | 16.3212 | -224.779 | 0.3747829 | 0 | 0            | 0 | -0.090528239 |
| cov2_4_10 | 16.3418 | -224.789 | 0.3751127 | 0 | 0            | 0 | -0.090818826 |
| cov1_4_7  | 16.3739 | -224.806 | 0.3729983 | 0 | -0.11228088  | 0 | 0            |
| cov1_4_8  | 16.3854 | -224.811 | 0.3729148 | 0 | -0.11234886  | 0 | 0            |
| cov1_3_10 | 16.4709 | -224.854 | 0.3667678 | 0 | -0.030974448 | 0 | 0            |
| cov1_3_9  | 16.4786 | -224.858 | 0.3664333 | 0 | -0.030110402 | 0 | 0            |

|            |         |          |           |   |              |   |              |
|------------|---------|----------|-----------|---|--------------|---|--------------|
| cov1_3_8   | 16.5219 | -224.88  | 0.360855  | 0 | -0.038070426 | 0 | 0            |
| cov1_6_11  | 16.5914 | -224.914 | 0.3721102 | 0 | -0.18328808  | 0 | 0            |
| cov3_8_9   | 16.6011 | -224.919 | 0.3617778 | 0 | 0            | 0 | 0            |
| cov1_3_7   | 16.6062 | -224.922 | 0.3611628 | 0 | -0.038412251 | 0 | 0            |
| cov2_3_4   | 16.6132 | -224.925 | 0.3727641 | 0 | 0            | 0 | -0.095729505 |
| cov3_8_10  | 16.652  | -224.945 | 0.3621835 | 0 | 0            | 0 | 0            |
| cov3_7_9   | 16.6685 | -224.953 | 0.3621103 | 0 | 0            | 0 | 0            |
| cov3_7_10  | 16.719  | -224.978 | 0.3625265 | 0 | 0            | 0 | 0            |
| cov2_3_9   | 16.7938 | -225.015 | 0.3670913 | 0 | 0            | 0 | -0.019796722 |
| cov2_3_10  | 16.8106 | -225.024 | 0.367503  | 0 | 0            | 0 | -0.020526474 |
| cov1_10_11 | 16.9882 | -225.113 | 0.3732532 | 0 | -0.06775719  | 0 | 0            |
| cov2_3_8   | 16.9956 | -225.116 | 0.3612241 | 0 | 0            | 0 | -0.028214733 |
| cov1_9_11  | 17.0104 | -225.124 | 0.3729129 | 0 | -0.067183128 | 0 | 0            |
| cov1_6_7   | 17.0238 | -225.131 | 0.3702648 | 0 | -0.15875039  | 0 | 0            |
| cov3_5_9   | 17.0288 | -225.133 | 0.3661685 | 0 | 0            | 0 | 0            |
| cov2_4_11  | 17.0316 | -225.134 | 0.3778096 | 0 | 0            | 0 | -0.12508515  |
| cov3_9_11  | 17.0395 | -225.138 | 0.3667536 | 0 | 0            | 0 | 0            |
| cov2_4_5   | 17.0406 | -225.139 | 0.3764311 | 0 | 0            | 0 | -0.11295834  |
| cov3_5_10  | 17.054  | -225.146 | 0.3665555 | 0 | 0            | 0 | 0            |
| cov3_9_10  | 17.0598 | -225.149 | 0.3666231 | 0 | 0            | 0 | 0            |
| cov1_6_8   | 17.0634 | -225.15  | 0.3701528 | 0 | -0.15819691  | 0 | 0            |
| cov3_4_9   | 17.0637 | -225.15  | 0.3665878 | 0 | 0            | 0 | 0            |
| cov3_6_9   | 17.0678 | -225.152 | 0.366481  | 0 | 0            | 0 | 0            |
| cov2_3_7   | 17.0863 | -225.162 | 0.3615323 | 0 | 0            | 0 | -0.028500945 |
| cov3_10_11 | 17.0918 | -225.164 | 0.3671635 | 0 | 0            | 0 | 0            |
| cov3_4_10  | 17.1072 | -225.172 | 0.3670103 | 0 | 0            | 0 | 0            |
| cov3_6_10  | 17.1079 | -225.173 | 0.366964  | 0 | 0            | 0 | 0            |
| cov2_4_7   | 17.1144 | -225.176 | 0.3768029 | 0 | 0            | 0 | -0.11570072  |
| cov2_4_8   | 17.1174 | -225.177 | 0.3767252 | 0 | 0            | 0 | -0.11589999  |
| cov2_4_6   | 17.1177 | -225.177 | 0.376696  | 0 | 0            | 0 | -0.11612364  |
| cov1_2_6   | 17.1621 | -225.2   | 0.3693967 | 0 | -0.15942254  | 0 | 0.003379535  |
| cov1_2_3   | 17.223  | -225.23  | 0.3661577 | 0 | -0.053727762 | 0 | 0.010447088  |
| cov3_5_8   | 17.3619 | -225.3   | 0.3585002 | 0 | 0            | 0 | 0            |
| cov3_5_7   | 17.4679 | -225.353 | 0.358788  | 0 | 0            | 0 | 0            |
| cov3_6_8   | 17.4834 | -225.36  | 0.3602171 | 0 | 0            | 0 | 0            |
| cov3_7_8   | 17.493  | -225.365 | 0.3597373 | 0 | 0            | 0 | 0            |
| cov2_3_11  | 17.4959 | -225.367 | 0.3695517 | 0 | 0            | 0 | -0.054173866 |
| cov1_7_10  | 17.5086 | -225.373 | 0.371597  | 0 | -0.032902412 | 0 | 0            |
| cov1_8_10  | 17.5409 | -225.389 | 0.3715029 | 0 | -0.032826571 | 0 | 0            |
| cov1_7_9   | 17.5499 | -225.394 | 0.371216  | 0 | -0.032002869 | 0 | 0            |
| cov3_6_7   | 17.5767 | -225.407 | 0.3605164 | 0 | 0            | 0 | 0            |
| cov1_8_9   | 17.5818 | -225.409 | 0.3711225 | 0 | -0.031928125 | 0 | 0            |
| cov3_4_8   | 17.5835 | -225.41  | 0.3592031 | 0 | 0            | 0 | 0            |
| cov3_8_11  | 17.5903 | -225.414 | 0.3592683 | 0 | 0            | 0 | 0            |
| cov2_3_5   | 17.6435 | -225.44  | 0.3693848 | 0 | 0            | 0 | -0.054760935 |
| cov1_2_10  | 17.6468 | -225.442 | 0.3703304 | 0 | -0.041373114 | 0 | 0.010664867  |
| cov1_9_10  | 17.6671 | -225.452 | 0.3705497 | 0 | -0.031858732 | 0 | 0            |



|            |         |          |           |   |              |   |              |
|------------|---------|----------|-----------|---|--------------|---|--------------|
| cov2_5_9   | 17.6701 | -225.454 | 0.372564  | 0 | 0            | 0 | -0.047384594 |
| cov2_6_9   | 17.6731 | -225.455 | 0.3709479 | 0 | 0            | 0 | -0.046320494 |
| cov3_4_7   | 17.6865 | -225.462 | 0.3594883 | 0 | 0            | 0 | 0            |
| cov1_2_9   | 17.6886 | -225.463 | 0.3699913 | 0 | -0.039777868 | 0 | 0.009800397  |
| cov3_7_11  | 17.6927 | -225.465 | 0.3595489 | 0 | 0            | 0 | 0            |
| cov2_6_10  | 17.6946 | -225.466 | 0.3714695 | 0 | 0            | 0 | -0.045981648 |
| cov2_5_10  | 17.6961 | -225.467 | 0.3729196 | 0 | 0            | 0 | -0.046999165 |
| cov2_3_6   | 17.7807 | -225.509 | 0.367679  | 0 | 0            | 0 | -0.047789621 |
| cov2_9_11  | 17.8312 | -225.534 | 0.3725635 | 0 | 0            | 0 | -0.035446565 |
| cov1_7_11  | 17.8361 | -225.537 | 0.376394  | 0 | -0.097274302 | 0 | 0            |
| cov2_10_11 | 17.8421 | -225.54  | 0.3729475 | 0 | 0            | 0 | -0.035461012 |
| cov2_7_10  | 17.868  | -225.553 | 0.372314  | 0 | 0            | 0 | -0.022514339 |
| cov2_7_9   | 17.8808 | -225.559 | 0.3718517 | 0 | 0            | 0 | -0.021830406 |
| cov1_8_11  | 17.8927 | -225.565 | 0.3762389 | 0 | -0.096457382 | 0 | 0            |
| cov2_8_10  | 17.8982 | -225.568 | 0.3722167 | 0 | 0            | 0 | -0.022478629 |
| cov2_8_9   | 17.9107 | -225.574 | 0.3717547 | 0 | 0            | 0 | -0.021795127 |
| cov4_5_10  | 17.9329 | -225.585 | 0.3705104 | 0 | 0            | 0 | 0            |
| cov4_5_9   | 17.9446 | -225.591 | 0.3700479 | 0 | 0            | 0 | 0            |
| cov7_8_9   | 17.9938 | -225.615 | 0.3710332 | 0 | 0            | 0 | 0            |
| cov2_9_10  | 17.9957 | -225.616 | 0.3711574 | 0 | 0            | 0 | -0.021683022 |
| cov7_8_10  | 18.0062 | -225.622 | 0.3715454 | 0 | 0            | 0 | 0            |
| cov4_7_9   | 18.1478 | -225.692 | 0.3712206 | 0 | 0            | 0 | 0            |
| cov4_6_9   | 18.1653 | -225.701 | 0.3709504 | 0 | 0            | 0 | 0            |
| cov4_8_9   | 18.1741 | -225.706 | 0.3711216 | 0 | 0            | 0 | 0            |
| cov4_7_10  | 18.1753 | -225.706 | 0.3717399 | 0 | 0            | 0 | 0            |
| cov4_6_10  | 18.1791 | -225.708 | 0.3714439 | 0 | 0            | 0 | 0            |
| cov7_9_10  | 18.1831 | -225.71  | 0.3713527 | 0 | 0            | 0 | 0            |
| cov4_8_10  | 18.2021 | -225.72  | 0.3716414 | 0 | 0            | 0 | 0            |
| cov1_2_11  | 18.2055 | -225.721 | 0.3743458 | 0 | -0.089541124 | 0 | 0.002163468  |
| cov7_9_11  | 18.2121 | -225.725 | 0.3712295 | 0 | 0            | 0 | 0            |
| cov5_7_9   | 18.2122 | -225.725 | 0.3710958 | 0 | 0            | 0 | 0            |
| cov8_9_10  | 18.2122 | -225.725 | 0.3712522 | 0 | 0            | 0 | 0            |
| cov6_7_9   | 18.2131 | -225.725 | 0.3711539 | 0 | 0            | 0 | 0            |
| cov4_9_11  | 18.2167 | -225.727 | 0.3699611 | 0 | 0            | 0 | 0            |
| cov5_7_10  | 18.2191 | -225.728 | 0.3715681 | 0 | 0            | 0 | 0            |
| cov6_7_10  | 18.222  | -225.73  | 0.3716907 | 0 | 0            | 0 | 0            |
| cov7_10_11 | 18.2263 | -225.732 | 0.3716519 | 0 | 0            | 0 | 0            |
| cov4_10_11 | 18.2353 | -225.736 | 0.3703934 | 0 | 0            | 0 | 0            |
| cov5_8_9   | 18.2411 | -225.739 | 0.3709966 | 0 | 0            | 0 | 0            |
| cov8_9_11  | 18.2415 | -225.739 | 0.3711127 | 0 | 0            | 0 | 0            |
| cov4_9_10  | 18.2418 | -225.74  | 0.3705498 | 0 | 0            | 0 | 0            |
| cov6_8_9   | 18.2419 | -225.74  | 0.3710542 | 0 | 0            | 0 | 0            |
| cov5_8_10  | 18.2483 | -225.743 | 0.3714693 | 0 | 0            | 0 | 0            |
| cov6_8_10  | 18.251  | -225.744 | 0.3715941 | 0 | 0            | 0 | 0            |
| cov8_10_11 | 18.2553 | -225.746 | 0.3715357 | 0 | 0            | 0 | 0            |
| cov5_9_10  | 18.3215 | -225.779 | 0.3703665 | 0 | 0            | 0 | 0            |
| cov9_10_11 | 18.3231 | -225.78  | 0.37034   | 0 | 0            | 0 | 0            |

|             |         |          |           |   |              |   |              |
|-------------|---------|----------|-----------|---|--------------|---|--------------|
| cov6_9_10   | 18.3234 | -225.78  | 0.3704322 | 0 | 0            | 0 | 0            |
| cov5_6_9    | 18.3512 | -225.794 | 0.3701325 | 0 | 0            | 0 | 0            |
| cov5_9_11   | 18.3514 | -225.794 | 0.3701665 | 0 | 0            | 0 | 0            |
| cov6_9_11   | 18.352  | -225.795 | 0.3701763 | 0 | 0            | 0 | 0            |
| cov5_10_11  | 18.3605 | -225.799 | 0.370608  | 0 | 0            | 0 | 0            |
| cov5_6_10   | 18.3605 | -225.799 | 0.3706117 | 0 | 0            | 0 | 0            |
| cov6_10_11  | 18.3625 | -225.8   | 0.3706531 | 0 | 0            | 0 | 0            |
| cov3_6_11   | 18.4184 | -225.828 | 0.3680007 | 0 | 0            | 0 | 0            |
| cov3_4_6    | 18.4256 | -225.831 | 0.3679546 | 0 | 0            | 0 | 0            |
| cov3_5_6    | 18.5045 | -225.871 | 0.3672516 | 0 | 0            | 0 | 0            |
| cov3_4_5    | 18.525  | -225.881 | 0.3662884 | 0 | 0            | 0 | 0            |
| cov1_7_8    | 18.6085 | -225.923 | 0.3722272 | 0 | -0.051782246 | 0 | 0            |
| cov3_5_11   | 18.6112 | -225.924 | 0.3662315 | 0 | 0            | 0 | 0            |
| cov3_4_11   | 18.7824 | -226.01  | 0.3664316 | 0 | 0            | 0 | 0            |
| cov1_2_7    | 18.854  | -226.046 | 0.3721388 | 0 | -0.058343585 | 0 | 0.007658618  |
| cov2_5_7    | 18.8783 | -226.058 | 0.3755949 | 0 | 0            | 0 | -0.074894994 |
| cov1_2_8    | 18.881  | -226.059 | 0.3720494 | 0 | -0.05817143  | 0 | 0.007591603  |
| cov2_5_8    | 18.9016 | -226.069 | 0.3754882 | 0 | 0            | 0 | -0.074802282 |
| cov2_5_6    | 18.9197 | -226.078 | 0.3750395 | 0 | 0            | 0 | -0.068118773 |
| cov2_5_11   | 18.9606 | -226.099 | 0.375092  | 0 | 0            | 0 | -0.075595262 |
| cov2_7_8    | 19.3612 | -226.299 | 0.3736371 | 0 | 0            | 0 | -0.041196644 |
| cov2_7_11   | 19.4427 | -226.34  | 0.3756442 | 0 | 0            | 0 | -0.055270006 |
| cov2_8_11   | 19.4741 | -226.356 | 0.3754957 | 0 | 0            | 0 | -0.05482428  |
| cov2_6_7    | 19.5625 | -226.4   | 0.3738269 | 0 | 0            | 0 | -0.051445595 |
| cov2_6_11   | 19.5677 | -226.402 | 0.3742848 | 0 | 0            | 0 | -0.055290774 |
| cov2_6_8    | 19.5853 | -226.411 | 0.3737251 | 0 | 0            | 0 | -0.051340931 |
| cov4_6_7    | 19.882  | -226.56  | 0.3739553 | 0 | 0            | 0 | 0            |
| cov4_6_8    | 19.8934 | -226.565 | 0.3738746 | 0 | 0            | 0 | 0            |
| cov4_6_11   | 19.9044 | -226.571 | 0.3733025 | 0 | 0            | 0 | 0            |
| cov4_5_6    | 19.907  | -226.572 | 0.3734997 | 0 | 0            | 0 | 0            |
| cov1_5_6_11 | 19.9364 | -223.077 | 0.3740149 | 0 | -0.30187491  | 0 | 0            |
| cov1_3_5_6  | 20.1364 | -223.177 | 0.3689642 | 0 | -0.25691553  | 0 | 0            |
| cov5_6_7    | 20.1515 | -226.694 | 0.374223  | 0 | 0            | 0 | 0            |
| cov5_6_8    | 20.1706 | -226.704 | 0.3741358 | 0 | 0            | 0 | 0            |
| cov6_7_8    | 20.1776 | -226.707 | 0.3732145 | 0 | 0            | 0 | 0            |
| cov5_6_11   | 20.2155 | -226.726 | 0.3732402 | 0 | 0            | 0 | 0            |
| cov1_5_6_7  | 20.2291 | -223.223 | 0.3728338 | 0 | -0.28104145  | 0 | 0            |
| cov1_5_6_8  | 20.2833 | -223.25  | 0.3727114 | 0 | -0.28016117  | 0 | 0            |
| cov1_5_6_9  | 20.3003 | -223.259 | 0.3708832 | 0 | -0.25726719  | 0 | 0            |
| cov1_5_6_10 | 20.3065 | -223.262 | 0.3710563 | 0 | -0.25750032  | 0 | 0            |
| cov1_4_5_6  | 20.3537 | -223.285 | 0.3717683 | 0 | -0.27297088  | 0 | 0            |
| cov6_7_11   | 20.394  | -226.816 | 0.3736935 | 0 | 0            | 0 | 0            |
| cov6_8_11   | 20.4151 | -226.826 | 0.3735584 | 0 | 0            | 0 | 0            |
| cov4_5_11   | 20.4663 | -226.852 | 0.3713399 | 0 | 0            | 0 | 0            |
| cov7_8_11   | 20.4878 | -226.862 | 0.3716367 | 0 | 0            | 0 | 0            |
| cov1_2_5_6  | 20.4934 | -223.355 | 0.3716425 | 0 | -0.27459322  | 0 | -0.001706696 |
| cov4_7_11   | 20.6065 | -226.922 | 0.3712808 | 0 | 0            | 0 | 0            |

|              |         |          |           |   |             |              |
|--------------|---------|----------|-----------|---|-------------|--------------|
| cov4_8_11    | 20.6097 | -226.923 | 0.3711498 | 0 | 0           | 0            |
| cov4_5_7     | 20.6424 | -226.94  | 0.3727146 | 0 | 0           | 0            |
| cov4_5_8     | 20.6512 | -226.944 | 0.3726115 | 0 | 0           | 0            |
| cov5_7_8     | 20.6558 | -226.946 | 0.3728284 | 0 | 0           | 0            |
| cov5_7_11    | 20.7377 | -226.987 | 0.371676  | 0 | 0           | 0            |
| cov5_8_11    | 20.748  | -226.993 | 0.3715496 | 0 | 0           | 0            |
| cov4_7_8     | 20.7549 | -226.996 | 0.3731272 | 0 | 0           | 0            |
| cov1_4_6_10  | 20.849  | -223.533 | 0.3699818 | 0 | -0.19671822 | 0            |
| cov1_4_6_9   | 20.8743 | -223.546 | 0.3696564 | 0 | -0.19611338 | 0            |
| cov1_3_5_11  | 21.0084 | -223.613 | 0.3732898 | 0 | -0.18470284 | 0            |
| cov1_5_7_11  | 21.0418 | -223.629 | 0.3788193 | 0 | -0.21933591 | 0            |
| cov1_3_4_6   | 21.0849 | -223.651 | 0.3672891 | 0 | -0.19741682 | 0            |
| cov1_2_4_6   | 21.0872 | -223.652 | 0.3731811 | 0 | -0.17773852 | -0.062550344 |
| cov1_5_8_11  | 21.1097 | -223.663 | 0.3786606 | 0 | -0.21835712 | 0            |
| cov1_4_6_11  | 21.1561 | -223.687 | 0.3736459 | 0 | -0.23952783 | 0            |
| cov1_3_6_9   | 21.1681 | -223.693 | 0.3639538 | 0 | -0.14731986 | 0            |
| cov1_3_6_10  | 21.1697 | -223.693 | 0.3643669 | 0 | -0.14821443 | 0            |
| cov1_3_6_11  | 21.237  | -223.727 | 0.366968  | 0 | -0.19069866 | 0            |
| cov1_4_5_11  | 21.3798 | -223.798 | 0.376249  | 0 | -0.20319373 | 0            |
| cov1_5_9_11  | 21.5702 | -223.894 | 0.3759232 | 0 | -0.19390429 | 0            |
| cov1_5_10_11 | 21.5743 | -223.896 | 0.3760021 | 0 | -0.19446873 | 0            |
| cov1_2_5_11  | 21.6025 | -223.91  | 0.3763145 | 0 | -0.20208721 | -0.002819522 |
| cov1_3_6_8   | 21.632  | -223.925 | 0.3585886 | 0 | -0.14636042 | 0            |
| cov1_3_4_11  | 21.6649 | -223.941 | 0.3717297 | 0 | -0.1388324  | 0            |
| cov1_4_6_7   | 21.7243 | -223.971 | 0.3714449 | 0 | -0.21194367 | 0            |
| cov1_3_6_7   | 21.7434 | -223.98  | 0.3590252 | 0 | -0.14610997 | 0            |
| cov1_4_6_8   | 21.7444 | -223.981 | 0.3713431 | 0 | -0.21173853 | 0            |
| cov1_2_4_11  | 21.8218 | -224.019 | 0.3781969 | 0 | -0.11602368 | -0.068014223 |
| cov1_3_4_5   | 21.9031 | -224.06  | 0.3714712 | 0 | -0.14980317 | 0            |
| cov1_5_7_8   | 21.9091 | -224.063 | 0.3746791 | 0 | -0.17084809 | 0            |
| cov1_6_10_11 | 21.9136 | -224.065 | 0.3705456 | 0 | -0.17371353 | 0            |
| cov1_6_9_11  | 21.9308 | -224.074 | 0.3701384 | 0 | -0.17308282 | 0            |
| cov1_3_5_9   | 21.9978 | -224.107 | 0.3709285 | 0 | -0.13697861 | 0            |
| cov1_3_5_10  | 22.0012 | -224.109 | 0.3710251 | 0 | -0.1374665  | 0            |
| cov1_4_5_7   | 22.0053 | -224.111 | 0.374592  | 0 | -0.16955617 | 0            |
| cov1_4_5_8   | 22.036  | -224.126 | 0.374493  | 0 | -0.16923698 | 0            |
| cov1_2_3_5   | 22.0423 | -224.13  | 0.3710893 | 0 | -0.1525936  | 0.00443426   |
| cov1_2_4_5   | 22.0437 | -224.13  | 0.3745298 | 0 | -0.14342161 | -0.027292141 |
| cov1_3_5_8   | 22.0457 | -224.131 | 0.3709095 | 0 | -0.14717824 | 0            |
| cov1_3_5_7   | 22.0458 | -224.131 | 0.3715664 | 0 | -0.15094851 | 0            |
| cov1_4_5_10  | 22.0783 | -224.148 | 0.373367  | 0 | -0.15209744 | 0            |
| cov1_4_5_9   | 22.0797 | -224.148 | 0.3732739 | 0 | -0.15227319 | 0            |
| cov1_5_7_9   | 22.0868 | -224.152 | 0.3745023 | 0 | -0.15858451 | 0            |
| cov1_5_7_10  | 22.0878 | -224.152 | 0.3745907 | 0 | -0.15870401 | 0            |
| cov1_4_10_11 | 22.1208 | -224.169 | 0.3746435 | 0 | -0.12992138 | 0            |
| cov1_5_8_9   | 22.1247 | -224.171 | 0.3744045 | 0 | -0.15835525 | 0            |
| cov1_5_8_10  | 22.1257 | -224.171 | 0.3744928 | 0 | -0.15848133 | 0            |

|              |         |          |           |   |              |   |              |
|--------------|---------|----------|-----------|---|--------------|---|--------------|
| cov1_4_9_11  | 22.136  | -224.176 | 0.3744236 | 0 | -0.12973205  | 0 | 0            |
| cov1_2_5_7   | 22.1398 | -224.178 | 0.3747156 | 0 | -0.17350997  | 0 | 0.002741968  |
| cov1_6_7_10  | 22.151  | -224.184 | 0.3692839 | 0 | -0.15195006  | 0 | 0            |
| cov1_2_5_8   | 22.1773 | -224.197 | 0.3746195 | 0 | -0.17318398  | 0 | 0.002681745  |
| cov1_6_7_9   | 22.1872 | -224.202 | 0.3688266 | 0 | -0.15091269  | 0 | 0            |
| cov1_6_8_10  | 22.2018 | -224.209 | 0.3691631 | 0 | -0.15134072  | 0 | 0            |
| cov1_6_8_9   | 22.2375 | -224.227 | 0.3687058 | 0 | -0.15030925  | 0 | 0            |
| cov1_3_9_11  | 22.2879 | -224.252 | 0.3690899 | 0 | -0.077839261 | 0 | 0            |
| cov1_3_10_11 | 22.2997 | -224.258 | 0.3693732 | 0 | -0.078457278 | 0 | 0            |
| cov1_2_5_9   | 22.3064 | -224.262 | 0.3732523 | 0 | -0.15864913  | 0 | 0.003127199  |
| cov1_2_5_10  | 22.3076 | -224.262 | 0.3733306 | 0 | -0.15893466  | 0 | 0.003309937  |
| cov1_5_9_10  | 22.3083 | -224.263 | 0.3733772 | 0 | -0.15608466  | 0 | 0            |
| cov1_2_3_6   | 22.3312 | -224.274 | 0.3639318 | 0 | -0.15889     | 0 | 0.006554988  |
| cov1_6_9_10  | 22.3642 | -224.291 | 0.3680083 | 0 | -0.1490436   | 0 | 0            |
| cov1_2_6_10  | 22.3685 | -224.293 | 0.3680016 | 0 | -0.15505955  | 0 | 0.006899714  |
| cov1_2_6_9   | 22.4033 | -224.31  | 0.3675857 | 0 | -0.1532553   | 0 | 0.005886075  |
| cov1_3_4_10  | 22.4103 | -224.314 | 0.3692484 | 0 | -0.080329856 | 0 | 0            |
| cov1_3_4_9   | 22.4226 | -224.32  | 0.3689897 | 0 | -0.079713658 | 0 | 0            |
| cov1_4_7_11  | 22.4236 | -224.32  | 0.3767745 | 0 | -0.15567582  | 0 | 0            |
| cov1_2_4_10  | 22.4435 | -224.33  | 0.3739937 | 0 | -0.067295798 | 0 | -0.050174751 |
| cov1_2_4_9   | 22.4549 | -224.336 | 0.3738145 | 0 | -0.066539165 | 0 | -0.050920403 |
| cov1_4_8_11  | 22.4622 | -224.34  | 0.3766333 | 0 | -0.15511794  | 0 | 0            |
| cov1_2_3_4   | 22.4804 | -224.349 | 0.3717999 | 0 | -0.073308948 | 0 | -0.047304106 |
| cov1_3_4_8   | 22.4915 | -224.354 | 0.365141  | 0 | -0.085688698 | 0 | 0            |
| cov1_3_8_11  | 22.5265 | -224.372 | 0.3647577 | 0 | -0.083000273 | 0 | 0            |
| cov1_3_4_7   | 22.5519 | -224.384 | 0.3655048 | 0 | -0.086612208 | 0 | 0            |
| cov1_3_7_11  | 22.5919 | -224.404 | 0.3651345 | 0 | -0.083835528 | 0 | 0            |
| cov1_2_4_7   | 22.7883 | -224.503 | 0.374973  | 0 | -0.078615111 | 0 | -0.059221614 |
| cov1_2_4_8   | 22.7942 | -224.506 | 0.374902  | 0 | -0.078527882 | 0 | -0.059488007 |
| cov1_4_7_10  | 22.8076 | -224.512 | 0.3724835 | 0 | -0.091121959 | 0 | 0            |
| cov1_4_8_10  | 22.8253 | -224.521 | 0.3723999 | 0 | -0.091297455 | 0 | 0            |
| cov1_4_7_9   | 22.8359 | -224.526 | 0.3722282 | 0 | -0.090829577 | 0 | 0            |
| cov1_4_8_9   | 22.8531 | -224.535 | 0.3721455 | 0 | -0.09100569  | 0 | 0            |
| cov1_4_9_10  | 22.8616 | -224.539 | 0.3719575 | 0 | -0.09190814  | 0 | 0            |
| cov1_2_3_11  | 22.9049 | -224.561 | 0.3691347 | 0 | -0.097022406 | 0 | 0.004166303  |
| cov2_3_4_9   | 22.9486 | -224.583 | 0.3715677 | 0 | 0            | 0 | -0.074352622 |
| cov2_3_4_10  | 22.9749 | -224.596 | 0.3718977 | 0 | 0            | 0 | -0.07487119  |
| cov1_3_8_9   | 23.1087 | -224.663 | 0.3621633 | 0 | -0.02814543  | 0 | 0            |
| cov1_3_8_10  | 23.1163 | -224.667 | 0.3624926 | 0 | -0.028992469 | 0 | 0            |
| cov1_4_7_8   | 23.1521 | -224.685 | 0.3728847 | 0 | -0.11209288  | 0 | 0            |
| cov1_3_7_9   | 23.1721 | -224.695 | 0.3625059 | 0 | -0.028263015 | 0 | 0            |
| cov2_3_4_8   | 23.1786 | -224.698 | 0.3673013 | 0 | 0            | 0 | -0.081366958 |
| cov1_3_7_10  | 23.1787 | -224.698 | 0.3628463 | 0 | -0.029118692 | 0 | 0            |
| cov2_4_9_11  | 23.2017 | -224.709 | 0.3761155 | 0 | 0            | 0 | -0.10122558  |
| cov1_6_7_11  | 23.2237 | -224.72  | 0.374153  | 0 | -0.19351473  | 0 | 0            |
| cov2_4_10_11 | 23.2357 | -224.726 | 0.3764042 | 0 | 0            | 0 | -0.10116662  |
| cov2_4_5_9   | 23.2413 | -224.729 | 0.3744138 | 0 | 0            | 0 | -0.086701635 |

|              |         |          |           |   |              |   |              |
|--------------|---------|----------|-----------|---|--------------|---|--------------|
| cov2_3_4_7   | 23.246  | -224.731 | 0.3676993 | 0 | 0            | 0 | -0.082417899 |
| cov2_4_5_10  | 23.2473 | -224.732 | 0.3747051 | 0 | 0            | 0 | -0.086471023 |
| cov2_4_6_9   | 23.2513 | -224.734 | 0.3746442 | 0 | 0            | 0 | -0.099582908 |
| cov2_4_6_10  | 23.2844 | -224.751 | 0.3750257 | 0 | 0            | 0 | -0.099314233 |
| cov1_6_8_11  | 23.2958 | -224.756 | 0.3739639 | 0 | -0.19203804  | 0 | 0            |
| cov2_4_7_9   | 23.3138 | -224.765 | 0.3750831 | 0 | 0            | 0 | -0.089147423 |
| cov2_4_8_9   | 23.3255 | -224.771 | 0.375012  | 0 | 0            | 0 | -0.089487931 |
| cov2_4_7_10  | 23.3336 | -224.775 | 0.3754214 | 0 | 0            | 0 | -0.089394302 |
| cov2_4_9_10  | 23.3367 | -224.777 | 0.3748599 | 0 | 0            | 0 | -0.090265339 |
| cov2_4_8_10  | 23.3455 | -224.781 | 0.375351  | 0 | 0            | 0 | -0.089739872 |
| cov2_3_9_11  | 23.3843 | -224.801 | 0.3691418 | 0 | 0            | 0 | -0.04044789  |
| cov1_3_7_8   | 23.3897 | -224.803 | 0.3611126 | 0 | -0.03849966  | 0 | 0            |
| cov2_3_8_9   | 23.3909 | -224.804 | 0.3625659 | 0 | 0            | 0 | -0.01817314  |
| cov2_3_4_11  | 23.4125 | -224.815 | 0.3739772 | 0 | 0            | 0 | -0.10753063  |
| cov2_3_8_10  | 23.4196 | -224.818 | 0.3629453 | 0 | 0            | 0 | -0.018919937 |
| cov2_3_10_11 | 23.4311 | -224.824 | 0.3694975 | 0 | 0            | 0 | -0.040637778 |
| cov1_2_3_10  | 23.454  | -224.835 | 0.3663731 | 0 | -0.041730285 | 0 | 0.012693973  |
| cov2_3_7_9   | 23.4559 | -224.836 | 0.3629069 | 0 | 0            | 0 | -0.018268124 |
| cov1_2_3_9   | 23.4653 | -224.841 | 0.3660581 | 0 | -0.040345838 | 0 | 0.012049597  |
| cov2_3_6_9   | 23.4662 | -224.842 | 0.3671831 | 0 | 0            | 0 | -0.044295403 |
| cov3_7_8_9   | 23.4749 | -224.846 | 0.3620343 | 0 | 0            | 0 | 0            |
| cov1_3_9_10  | 23.4819 | -224.849 | 0.3666297 | 0 | -0.030376754 | 0 | 0            |
| cov2_3_7_10  | 23.4841 | -224.851 | 0.3632971 | 0 | 0            | 0 | -0.01901781  |
| cov2_3_6_10  | 23.5129 | -224.865 | 0.3676522 | 0 | 0            | 0 | -0.04407528  |
| cov1_2_3_8   | 23.5145 | -224.866 | 0.3605265 | 0 | -0.047408201 | 0 | 0.010916076  |
| cov3_7_8_10  | 23.525  | -224.871 | 0.3624458 | 0 | 0            | 0 | 0            |
| cov3_5_8_9   | 23.5378 | -224.877 | 0.361056  | 0 | 0            | 0 | 0            |
| cov1_7_10_11 | 23.5521 | -224.885 | 0.3755399 | 0 | -0.077553947 | 0 | 0            |
| cov2_3_4_5   | 23.5565 | -224.887 | 0.3724617 | 0 | 0            | 0 | -0.092726243 |
| cov3_5_8_10  | 23.5704 | -224.894 | 0.3613797 | 0 | 0            | 0 | 0            |
| cov1_7_9_11  | 23.5759 | -224.896 | 0.3751929 | 0 | -0.076940165 | 0 | 0            |
| cov1_2_3_7   | 23.5991 | -224.908 | 0.3608359 | 0 | -0.047708155 | 0 | 0.010866518  |
| cov1_6_7_8   | 23.603  | -224.91  | 0.3700197 | 0 | -0.16461251  | 0 | 0            |
| cov3_8_9_11  | 23.6073 | -224.912 | 0.3620177 | 0 | 0            | 0 | 0            |
| cov3_5_7_9   | 23.6091 | -224.913 | 0.3614045 | 0 | 0            | 0 | 0            |
| cov1_2_6_11  | 23.6114 | -224.914 | 0.3721346 | 0 | -0.18264772  | 0 | -0.000841074 |
| cov1_8_10_11 | 23.6123 | -224.915 | 0.3753842 | 0 | -0.076790478 | 0 | 0            |
| cov3_6_8_9   | 23.6195 | -224.918 | 0.3617296 | 0 | 0            | 0 | 0            |
| cov3_4_8_9   | 23.6206 | -224.919 | 0.3618294 | 0 | 0            | 0 | 0            |
| cov3_8_9_10  | 23.6207 | -224.919 | 0.3618303 | 0 | 0            | 0 | 0            |
| cov2_3_4_6   | 23.6242 | -224.921 | 0.3727154 | 0 | 0            | 0 | -0.099000735 |
| cov1_8_9_11  | 23.636  | -224.927 | 0.375037  | 0 | -0.076176939 | 0 | 0            |
| cov3_5_7_10  | 23.6416 | -224.929 | 0.3617376 | 0 | 0            | 0 | 0            |
| cov3_8_10_11 | 23.6651 | -224.941 | 0.3623595 | 0 | 0            | 0 | 0            |
| cov3_4_8_10  | 23.6722 | -224.945 | 0.3621911 | 0 | 0            | 0 | 0            |
| cov3_6_8_10  | 23.6722 | -224.945 | 0.3621783 | 0 | 0            | 0 | 0            |
| cov3_7_9_11  | 23.6738 | -224.945 | 0.3623586 | 0 | 0            | 0 | 0            |

|              |         |          |           |   |              |   |              |
|--------------|---------|----------|-----------|---|--------------|---|--------------|
| cov3_6_7_9   | 23.6873 | -224.952 | 0.3620689 | 0 | 0            | 0 | 0            |
| cov3_4_7_9   | 23.6878 | -224.952 | 0.3621686 | 0 | 0            | 0 | 0            |
| cov3_7_9_10  | 23.6879 | -224.952 | 0.3621733 | 0 | 0            | 0 | 0            |
| cov2_3_5_9   | 23.7135 | -224.965 | 0.3683351 | 0 | 0            | 0 | -0.034103127 |
| cov3_7_10_11 | 23.7316 | -224.974 | 0.3627102 | 0 | 0            | 0 | 0            |
| cov3_4_7_10  | 23.7392 | -224.978 | 0.3625408 | 0 | 0            | 0 | 0            |
| cov3_6_7_10  | 23.7392 | -224.978 | 0.3625261 | 0 | 0            | 0 | 0            |
| cov2_3_5_10  | 23.7443 | -224.981 | 0.3686476 | 0 | 0            | 0 | -0.033930425 |
| cov2_3_8_11  | 23.7713 | -224.994 | 0.363204  | 0 | 0            | 0 | -0.044617558 |
| cov2_3_9_10  | 23.8043 | -225.011 | 0.3672435 | 0 | 0            | 0 | -0.019857089 |
| cov3_4_5_9   | 23.845  | -225.031 | 0.3663312 | 0 | 0            | 0 | 0            |
| cov2_3_7_11  | 23.8569 | -225.037 | 0.3635435 | 0 | 0            | 0 | -0.045091014 |
| cov3_4_5_10  | 23.8573 | -225.037 | 0.3667391 | 0 | 0            | 0 | 0            |
| cov2_4_5_11  | 23.8631 | -225.04  | 0.3781085 | 0 | 0            | 0 | -0.12592227  |
| cov3_5_9_11  | 23.8663 | -225.042 | 0.3664562 | 0 | 0            | 0 | 0            |
| cov2_3_7_8   | 23.8734 | -225.045 | 0.3614816 | 0 | 0            | 0 | -0.02853453  |
| cov2_3_6_8   | 23.8735 | -225.045 | 0.361077  | 0 | 0            | 0 | -0.044566374 |
| cov2_4_7_8   | 23.9037 | -225.06  | 0.3766826 | 0 | 0            | 0 | -0.11531561  |
| cov3_5_10_11 | 23.9042 | -225.061 | 0.3668592 | 0 | 0            | 0 | 0            |
| cov3_5_6_9   | 23.9541 | -225.086 | 0.3650215 | 0 | 0            | 0 | 0            |
| cov2_3_6_7   | 23.9722 | -225.095 | 0.3614074 | 0 | 0            | 0 | -0.044399614 |
| cov2_3_5_8   | 23.9774 | -225.097 | 0.3624257 | 0 | 0            | 0 | -0.037359928 |
| cov3_5_6_10  | 23.9857 | -225.101 | 0.3654991 | 0 | 0            | 0 | 0            |
| cov1_9_10_11 | 23.9987 | -225.108 | 0.3731131 | 0 | -0.067259187 | 0 | 0            |
| cov1_2_10_11 | 24.0007 | -225.109 | 0.3730444 | 0 | -0.072320461 | 0 | 0.005784636  |
| cov1_2_9_11  | 24.0251 | -225.121 | 0.3727347 | 0 | -0.071056087 | 0 | 0.004899126  |
| cov2_4_5_6   | 24.0278 | -225.122 | 0.3763823 | 0 | 0            | 0 | -0.11980068  |
| cov2_4_6_11  | 24.0348 | -225.126 | 0.3780003 | 0 | 0            | 0 | -0.1215467   |
| cov2_4_7_11  | 24.035  | -225.126 | 0.3781841 | 0 | 0            | 0 | -0.12541656  |
| cov3_5_9_10  | 24.0373 | -225.127 | 0.3663155 | 0 | 0            | 0 | 0            |
| cov3_6_9_11  | 24.0378 | -225.127 | 0.3671315 | 0 | 0            | 0 | 0            |
| cov1_2_6_7   | 24.0406 | -225.129 | 0.3701778 | 0 | -0.16184525  | 0 | 0.003829642  |
| cov2_4_8_11  | 24.0443 | -225.131 | 0.3780609 | 0 | 0            | 0 | -0.12531013  |
| cov3_9_10_11 | 24.0536 | -225.135 | 0.3668616 | 0 | 0            | 0 | 0            |
| cov3_4_9_11  | 24.0576 | -225.137 | 0.3667187 | 0 | 0            | 0 | 0            |
| cov2_4_5_8   | 24.0601 | -225.139 | 0.3763801 | 0 | 0            | 0 | -0.11303862  |
| cov2_4_5_7   | 24.0605 | -225.139 | 0.3764634 | 0 | 0            | 0 | -0.11290561  |
| cov2_3_5_7   | 24.0619 | -225.139 | 0.3628338 | 0 | 0            | 0 | -0.038374046 |
| cov3_4_9_10  | 24.0764 | -225.147 | 0.3667126 | 0 | 0            | 0 | 0            |
| cov3_6_9_10  | 24.08   | -225.148 | 0.3666185 | 0 | 0            | 0 | 0            |
| cov1_2_6_8   | 24.0803 | -225.149 | 0.3700673 | 0 | -0.16123463  | 0 | 0.003760515  |
| cov3_4_6_9   | 24.0812 | -225.149 | 0.3667254 | 0 | 0            | 0 | 0            |
| cov3_6_10_11 | 24.0843 | -225.151 | 0.3675695 | 0 | 0            | 0 | 0            |
| cov3_4_10_11 | 24.1096 | -225.163 | 0.3671265 | 0 | 0            | 0 | 0            |
| cov3_4_6_10  | 24.1208 | -225.169 | 0.3672132 | 0 | 0            | 0 | 0            |
| cov2_4_6_7   | 24.1346 | -225.176 | 0.3768039 | 0 | 0            | 0 | -0.11585686  |
| cov2_4_6_8   | 24.1376 | -225.177 | 0.3767261 | 0 | 0            | 0 | -0.11604743  |

|              |         |          |           |   |              |   |              |
|--------------|---------|----------|-----------|---|--------------|---|--------------|
| cov3_4_5_8   | 24.1443 | -225.181 | 0.3583985 | 0 | 0            | 0 | 0            |
| cov3_5_7_8   | 24.2533 | -225.235 | 0.3587259 | 0 | 0            | 0 | 0            |
| cov3_4_5_7   | 24.2553 | -225.236 | 0.3586789 | 0 | 0            | 0 | 0            |
| cov1_7_8_10  | 24.299  | -225.258 | 0.3714964 | 0 | -0.033122666 | 0 | 0            |
| cov3_5_8_11  | 24.3108 | -225.264 | 0.3584976 | 0 | 0            | 0 | 0            |
| cov1_7_8_9   | 24.3401 | -225.279 | 0.371121  | 0 | -0.03223913  | 0 | 0            |
| cov3_5_6_8   | 24.3711 | -225.294 | 0.3578078 | 0 | 0            | 0 | 0            |
| cov3_6_7_8   | 24.3803 | -225.299 | 0.3604232 | 0 | 0            | 0 | 0            |
| cov3_5_7_11  | 24.4198 | -225.318 | 0.358787  | 0 | 0            | 0 | 0            |
| cov2_3_5_11  | 24.4531 | -225.335 | 0.3702106 | 0 | 0            | 0 | -0.062224608 |
| cov3_4_7_8   | 24.4739 | -225.345 | 0.3594249 | 0 | 0            | 0 | 0            |
| cov3_7_8_11  | 24.4822 | -225.35  | 0.3594933 | 0 | 0            | 0 | 0            |
| cov3_5_6_7   | 24.4824 | -225.35  | 0.3582935 | 0 | 0            | 0 | 0            |
| cov3_6_8_11  | 24.4851 | -225.351 | 0.3607635 | 0 | 0            | 0 | 0            |
| cov3_4_6_8   | 24.4913 | -225.354 | 0.3606944 | 0 | 0            | 0 | 0            |
| cov1_2_7_10  | 24.4996 | -225.358 | 0.3712596 | 0 | -0.042467242 | 0 | 0.011276249  |
| cov2_3_6_11  | 24.5133 | -225.365 | 0.3694889 | 0 | 0            | 0 | -0.055944504 |
| cov1_7_9_10  | 24.5231 | -225.37  | 0.3714907 | 0 | -0.032434585 | 0 | 0            |
| cov1_2_8_10  | 24.5322 | -225.375 | 0.3711678 | 0 | -0.042331209 | 0 | 0.011204559  |
| cov2_5_7_9   | 24.544  | -225.381 | 0.373511  | 0 | 0            | 0 | -0.047635197 |
| cov1_2_7_9   | 24.5453 | -225.381 | 0.3709071 | 0 | -0.04083143  | 0 | 0.010381262  |
| cov2_6_7_9   | 24.5459 | -225.381 | 0.3719005 | 0 | 0            | 0 | -0.046611106 |
| cov1_8_9_10  | 24.5554 | -225.386 | 0.3713966 | 0 | -0.032358147 | 0 | 0            |
| cov2_6_7_10  | 24.5655 | -225.391 | 0.3724296 | 0 | 0            | 0 | -0.046264607 |
| cov2_5_7_10  | 24.5688 | -225.393 | 0.3738709 | 0 | 0            | 0 | -0.047213914 |
| cov2_5_8_9   | 24.5737 | -225.395 | 0.373413  | 0 | 0            | 0 | -0.047609864 |
| cov3_6_7_11  | 24.5754 | -225.396 | 0.3611035 | 0 | 0            | 0 | 0            |
| cov1_2_8_9   | 24.5775 | -225.397 | 0.3708155 | 0 | -0.040697222 | 0 | 0.010311642  |
| cov2_6_8_9   | 24.5783 | -225.398 | 0.37179   | 0 | 0            | 0 | -0.046491755 |
| cov3_4_6_7   | 24.5815 | -225.399 | 0.3610452 | 0 | 0            | 0 | 0            |
| cov1_7_8_11  | 24.5839 | -225.4   | 0.3763045 | 0 | -0.097591307 | 0 | 0            |
| cov2_5_6_9   | 24.5979 | -225.407 | 0.3719828 | 0 | 0            | 0 | -0.053533867 |
| cov2_6_8_10  | 24.598  | -225.408 | 0.3723193 | 0 | 0            | 0 | -0.046143896 |
| cov2_5_8_10  | 24.5987 | -225.408 | 0.3737729 | 0 | 0            | 0 | -0.047192444 |
| cov3_4_8_11  | 24.5987 | -225.408 | 0.3591663 | 0 | 0            | 0 | 0            |
| cov2_7_9_11  | 24.6008 | -225.409 | 0.3742721 | 0 | 0            | 0 | -0.039580302 |
| cov2_7_10_11 | 24.6155 | -225.416 | 0.3746505 | 0 | 0            | 0 | -0.039576017 |
| cov2_5_9_11  | 24.6281 | -225.423 | 0.3732858 | 0 | 0            | 0 | -0.051708997 |
| cov2_5_6_10  | 24.6314 | -225.424 | 0.3724067 | 0 | 0            | 0 | -0.052837796 |
| cov2_8_9_11  | 24.6424 | -225.43  | 0.3741244 | 0 | 0            | 0 | -0.039187873 |
| cov2_6_9_11  | 24.6466 | -225.432 | 0.3718245 | 0 | 0            | 0 | -0.049684772 |
| cov2_8_10_11 | 24.6567 | -225.437 | 0.3745035 | 0 | 0            | 0 | -0.03918254  |
| cov2_3_5_6   | 24.6604 | -225.439 | 0.3692658 | 0 | 0            | 0 | -0.056190989 |
| cov2_5_10_11 | 24.6611 | -225.439 | 0.3736147 | 0 | 0            | 0 | -0.051106199 |
| cov1_2_9_10  | 24.662  | -225.44  | 0.3702356 | 0 | -0.040788076 | 0 | 0.010488144  |
| cov2_7_8_10  | 24.6636 | -225.44  | 0.3722163 | 0 | 0            | 0 | -0.022655206 |
| cov2_6_9_10  | 24.6715 | -225.444 | 0.3711402 | 0 | 0            | 0 | -0.046101042 |

|              |         |          |           |   |              |   |              |
|--------------|---------|----------|-----------|---|--------------|---|--------------|
| cov2_6_10_11 | 24.675  | -225.446 | 0.3722807 | 0 | 0            | 0 | -0.049099506 |
| cov2_7_8_9   | 24.6764 | -225.447 | 0.3717618 | 0 | 0            | 0 | -0.021977445 |
| cov2_5_9_10  | 24.6809 | -225.449 | 0.3726577 | 0 | 0            | 0 | -0.046868722 |
| cov3_4_7_11  | 24.7013 | -225.459 | 0.3594494 | 0 | 0            | 0 | 0            |
| cov2_9_10_11 | 24.83   | -225.524 | 0.3727159 | 0 | 0            | 0 | -0.035207057 |
| cov1_2_7_11  | 24.8555 | -225.536 | 0.3763308 | 0 | -0.098794585 | 0 | 0.001898432  |
| cov2_7_9_10  | 24.8675 | -225.542 | 0.3720908 | 0 | 0            | 0 | -0.02192505  |
| cov4_5_7_10  | 24.8887 | -225.553 | 0.3711395 | 0 | 0            | 0 | 0            |
| cov2_8_9_10  | 24.8977 | -225.557 | 0.3719935 | 0 | 0            | 0 | -0.021889308 |
| cov4_5_7_9   | 24.9006 | -225.559 | 0.3706764 | 0 | 0            | 0 | 0            |
| cov4_5_8_10  | 24.9079 | -225.562 | 0.3710389 | 0 | 0            | 0 | 0            |
| cov1_2_8_11  | 24.912  | -225.565 | 0.3761752 | 0 | -0.0979863   | 0 | 0.001909241  |
| cov4_5_8_9   | 24.9198 | -225.568 | 0.3705759 | 0 | 0            | 0 | 0            |
| cov4_5_9_10  | 24.9229 | -225.57  | 0.3702803 | 0 | 0            | 0 | 0            |
| cov4_7_8_9   | 24.9508 | -225.584 | 0.3711213 | 0 | 0            | 0 | 0            |
| cov4_5_10_11 | 24.9524 | -225.585 | 0.370562  | 0 | 0            | 0 | 0            |
| cov4_5_6_10  | 24.9524 | -225.585 | 0.3704473 | 0 | 0            | 0 | 0            |
| cov4_5_9_11  | 24.9635 | -225.59  | 0.3701135 | 0 | 0            | 0 | 0            |
| cov4_5_6_9   | 24.9641 | -225.591 | 0.3699774 | 0 | 0            | 0 | 0            |
| cov4_7_8_10  | 24.9779 | -225.597 | 0.3716364 | 0 | 0            | 0 | 0            |
| cov7_8_9_10  | 24.9837 | -225.6   | 0.3712539 | 0 | 0            | 0 | 0            |
| cov5_7_8_9   | 25.0118 | -225.614 | 0.370994  | 0 | 0            | 0 | 0            |
| cov7_8_9_11  | 25.0123 | -225.615 | 0.3711326 | 0 | 0            | 0 | 0            |
| cov6_7_8_9   | 25.0139 | -225.615 | 0.3710406 | 0 | 0            | 0 | 0            |
| cov5_7_8_10  | 25.0183 | -225.618 | 0.3714624 | 0 | 0            | 0 | 0            |
| cov6_7_8_10  | 25.0242 | -225.621 | 0.3715805 | 0 | 0            | 0 | 0            |
| cov7_8_10_11 | 25.0264 | -225.622 | 0.3715501 | 0 | 0            | 0 | 0            |
| cov4_6_7_9   | 25.0868 | -225.652 | 0.371665  | 0 | 0            | 0 | 0            |
| cov4_6_7_10  | 25.0988 | -225.658 | 0.3721689 | 0 | 0            | 0 | 0            |
| cov4_6_8_9   | 25.11   | -225.663 | 0.3715806 | 0 | 0            | 0 | 0            |
| cov4_6_8_10  | 25.1221 | -225.67  | 0.3720846 | 0 | 0            | 0 | 0            |
| cov4_7_9_10  | 25.1424 | -225.68  | 0.3714236 | 0 | 0            | 0 | 0            |
| cov4_7_9_11  | 25.1512 | -225.684 | 0.3708712 | 0 | 0            | 0 | 0            |
| cov4_6_9_10  | 25.1624 | -225.69  | 0.3711351 | 0 | 0            | 0 | 0            |
| cov4_8_9_10  | 25.169  | -225.693 | 0.3713212 | 0 | 0            | 0 | 0            |
| cov4_7_10_11 | 25.1709 | -225.694 | 0.3713027 | 0 | 0            | 0 | 0            |
| cov4_8_9_11  | 25.1742 | -225.696 | 0.3707406 | 0 | 0            | 0 | 0            |
| cov4_6_9_11  | 25.1809 | -225.699 | 0.3707317 | 0 | 0            | 0 | 0            |
| cov4_6_10_11 | 25.1927 | -225.705 | 0.3711765 | 0 | 0            | 0 | 0            |
| cov4_8_10_11 | 25.1937 | -225.705 | 0.3711709 | 0 | 0            | 0 | 0            |
| cov5_7_9_10  | 25.1999 | -225.708 | 0.3713101 | 0 | 0            | 0 | 0            |
| cov6_7_9_10  | 25.2022 | -225.71  | 0.3713842 | 0 | 0            | 0 | 0            |
| cov7_9_10_11 | 25.2023 | -225.71  | 0.3714259 | 0 | 0            | 0 | 0            |
| cov4_9_10_11 | 25.2116 | -225.714 | 0.3701421 | 0 | 0            | 0 | 0            |
| cov5_7_9_11  | 25.224  | -225.72  | 0.371328  | 0 | 0            | 0 | 0            |
| cov6_7_9_11  | 25.2265 | -225.722 | 0.3715075 | 0 | 0            | 0 | 0            |
| cov5_8_9_10  | 25.2291 | -225.723 | 0.3712105 | 0 | 0            | 0 | 0            |



|                |         |          |           |   |              |   |              |
|----------------|---------|----------|-----------|---|--------------|---|--------------|
| cov6_8_9_10    | 25.2312 | -225.724 | 0.3712807 | 0 | 0            | 0 | 0            |
| cov8_9_10_11   | 25.2318 | -225.724 | 0.3713068 | 0 | 0            | 0 | 0            |
| cov5_6_7_9     | 25.2322 | -225.725 | 0.3710633 | 0 | 0            | 0 | 0            |
| cov5_7_10_11   | 25.2328 | -225.725 | 0.3717791 | 0 | 0            | 0 | 0            |
| cov6_7_10_11   | 25.2377 | -225.727 | 0.3719826 | 0 | 0            | 0 | 0            |
| cov5_6_7_10    | 25.2392 | -225.728 | 0.371549  | 0 | 0            | 0 | 0            |
| cov5_8_9_11    | 25.2547 | -225.736 | 0.3712016 | 0 | 0            | 0 | 0            |
| cov6_8_9_11    | 25.2568 | -225.737 | 0.3713685 | 0 | 0            | 0 | 0            |
| cov5_6_8_9     | 25.2612 | -225.739 | 0.3709704 | 0 | 0            | 0 | 0            |
| cov5_8_10_11   | 25.2637 | -225.74  | 0.3716518 | 0 | 0            | 0 | 0            |
| cov6_8_10_11   | 25.2679 | -225.742 | 0.3718438 | 0 | 0            | 0 | 0            |
| cov5_6_8_10    | 25.2685 | -225.743 | 0.3714558 | 0 | 0            | 0 | 0            |
| cov5_6_9_10    | 25.3411 | -225.779 | 0.370299  | 0 | 0            | 0 | 0            |
| cov5_9_10_11   | 25.3417 | -225.779 | 0.3703687 | 0 | 0            | 0 | 0            |
| cov6_9_10_11   | 25.3432 | -225.78  | 0.3703669 | 0 | 0            | 0 | 0            |
| cov5_6_9_11    | 25.3714 | -225.794 | 0.3701206 | 0 | 0            | 0 | 0            |
| cov5_6_10_11   | 25.3805 | -225.799 | 0.3705665 | 0 | 0            | 0 | 0            |
| cov3_4_6_11    | 25.388  | -225.802 | 0.3685142 | 0 | 0            | 0 | 0            |
| cov3_4_5_6     | 25.3974 | -225.807 | 0.3674863 | 0 | 0            | 0 | 0            |
| cov3_5_6_11    | 25.4347 | -225.826 | 0.3678296 | 0 | 0            | 0 | 0            |
| cov3_4_5_11    | 25.5225 | -225.87  | 0.3664014 | 0 | 0            | 0 | 0            |
| cov1_2_7_8     | 25.6147 | -225.916 | 0.3720167 | 0 | -0.058497241 | 0 | 0.007810077  |
| cov2_5_7_8     | 25.6549 | -225.936 | 0.3754634 | 0 | 0            | 0 | -0.074604658 |
| cov2_5_6_7     | 25.8491 | -226.033 | 0.3757848 | 0 | 0            | 0 | -0.06859975  |
| cov2_5_6_8     | 25.8722 | -226.045 | 0.3756886 | 0 | 0            | 0 | -0.068491021 |
| cov2_5_7_11    | 25.8784 | -226.048 | 0.3761576 | 0 | 0            | 0 | -0.078015146 |
| cov2_5_8_11    | 25.9048 | -226.061 | 0.3760122 | 0 | 0            | 0 | -0.077680171 |
| cov2_5_6_11    | 25.9198 | -226.068 | 0.3755669 | 0 | 0            | 0 | -0.069904058 |
| cov2_7_8_11    | 26.2042 | -226.211 | 0.3755496 | 0 | 0            | 0 | -0.055386272 |
| cov2_6_7_8     | 26.3095 | -226.263 | 0.3737222 | 0 | 0            | 0 | -0.053024192 |
| cov1_3_5_6_11  | 26.3393 | -222.768 | 0.3710574 | 0 | -0.28254722  | 0 | 0            |
| cov1_5_6_7_11  | 26.3704 | -222.784 | 0.3767026 | 0 | -0.31799342  | 0 | 0            |
| cov1_5_6_8_11  | 26.4579 | -222.827 | 0.3765072 | 0 | -0.31617937  | 0 | 0            |
| cov2_6_7_11    | 26.4596 | -226.338 | 0.3755411 | 0 | 0            | 0 | -0.057152656 |
| cov2_6_8_11    | 26.4905 | -226.354 | 0.3753842 | 0 | 0            | 0 | -0.056834992 |
| cov4_6_7_8     | 26.7129 | -226.465 | 0.3738277 | 0 | 0            | 0 | 0            |
| cov1_5_6_9_11  | 26.7953 | -222.996 | 0.3732899 | 0 | -0.28411439  | 0 | 0            |
| cov1_4_5_6_11  | 26.8008 | -222.999 | 0.3742191 | 0 | -0.29915645  | 0 | 0            |
| cov1_5_6_10_11 | 26.8062 | -223.002 | 0.3734507 | 0 | -0.28453169  | 0 | 0            |
| cov1_5_6_7_8   | 26.84   | -223.018 | 0.3725892 | 0 | -0.28615343  | 0 | 0            |
| cov4_6_7_11    | 26.9008 | -226.559 | 0.3738009 | 0 | 0            | 0 | 0            |
| cov4_5_6_7     | 26.9009 | -226.559 | 0.3738952 | 0 | 0            | 0 | 0            |
| cov4_6_8_11    | 26.9113 | -226.564 | 0.3736778 | 0 | 0            | 0 | 0            |
| cov4_5_6_8     | 26.9118 | -226.564 | 0.373806  | 0 | 0            | 0 | 0            |
| cov4_5_6_11    | 26.9222 | -226.57  | 0.3732735 | 0 | 0            | 0 | 0            |
| cov1_2_5_6_11  | 26.9486 | -223.073 | 0.3742013 | 0 | -0.29760524  | 0 | -0.005902721 |
| cov1_3_5_6_9   | 26.9556 | -223.076 | 0.3682423 | 0 | -0.23774656  | 0 | 0            |

|                |         |          |           |   |             |   |              |
|----------------|---------|----------|-----------|---|-------------|---|--------------|
| cov1_3_5_6_10  | 26.9664 | -223.082 | 0.3684374 | 0 | -0.23830996 | 0 | 0            |
| cov5_6_7_8     | 26.9794 | -226.598 | 0.3740568 | 0 | 0           | 0 | 0            |
| cov1_5_6_7_9   | 27.035  | -223.116 | 0.3721778 | 0 | -0.26163013 | 0 | 0            |
| cov1_5_6_7_10  | 27.0404 | -223.119 | 0.3723551 | 0 | -0.2618103  | 0 | 0            |
| cov1_3_4_5_6   | 27.0728 | -223.135 | 0.3692776 | 0 | -0.25599192 | 0 | 0            |
| cov1_5_6_8_9   | 27.0914 | -223.144 | 0.3720541 | 0 | -0.26083333 | 0 | 0            |
| cov1_5_6_8_10  | 27.0968 | -223.147 | 0.3722314 | 0 | -0.26101917 | 0 | 0            |
| cov1_3_4_6_11  | 27.1474 | -223.172 | 0.3696988 | 0 | -0.22950634 | 0 | 0            |
| cov1_4_5_6_9   | 27.1487 | -223.173 | 0.3709941 | 0 | -0.25248191 | 0 | 0            |
| cov1_4_5_6_10  | 27.1504 | -223.174 | 0.3711744 | 0 | -0.2524108  | 0 | 0            |
| cov1_3_5_6_7   | 27.1526 | -223.175 | 0.3695851 | 0 | -0.26061019 | 0 | 0            |
| cov1_3_5_6_8   | 27.156  | -223.176 | 0.3687159 | 0 | -0.25547604 | 0 | 0            |
| cov1_2_3_5_6   | 27.1565 | -223.177 | 0.3689463 | 0 | -0.25734912 | 0 | 0.000586374  |
| cov5_6_7_11    | 27.1707 | -226.694 | 0.3740986 | 0 | 0           | 0 | 0            |
| cov1_4_5_6_7   | 27.1741 | -223.185 | 0.3728068 | 0 | -0.27826889 | 0 | 0            |
| cov5_6_8_11    | 27.1891 | -226.703 | 0.3739733 | 0 | 0           | 0 | 0            |
| cov6_7_8_11    | 27.1936 | -226.705 | 0.3735001 | 0 | 0           | 0 | 0            |
| cov1_4_5_6_8   | 27.2213 | -223.209 | 0.3726842 | 0 | -0.27731277 | 0 | 0            |
| cov1_2_5_6_7   | 27.249  | -223.223 | 0.3728651 | 0 | -0.28012118 | 0 | -0.001194781 |
| cov1_2_4_5_6   | 27.2625 | -223.23  | 0.3726614 | 0 | -0.24923212 | 0 | -0.028185622 |
| cov1_3_6_9_11  | 27.2756 | -223.236 | 0.3665866 | 0 | -0.18168379 | 0 | 0            |
| cov1_3_6_10_11 | 27.2971 | -223.247 | 0.3669431 | 0 | -0.18221885 | 0 | 0            |
| cov1_2_5_6_8   | 27.3031 | -223.25  | 0.3727444 | 0 | -0.27919661 | 0 | -0.001252557 |
| cov1_5_6_9_10  | 27.3189 | -223.258 | 0.3709255 | 0 | -0.25699659 | 0 | 0            |
| cov1_2_5_6_9   | 27.3205 | -223.259 | 0.370886  | 0 | -0.25719447 | 0 | -9.91E-05    |
| cov1_2_5_6_10  | 27.3267 | -223.262 | 0.3710485 | 0 | -0.25769545 | 0 | 0.000269829  |
| cov1_2_4_6_11  | 27.3404 | -223.269 | 0.3764144 | 0 | -0.20534164 | 0 | -0.069695762 |
| cov1_4_6_10_11 | 27.3454 | -223.271 | 0.3724275 | 0 | -0.22331068 | 0 | 0            |
| cov1_3_4_6_10  | 27.3553 | -223.276 | 0.3669843 | 0 | -0.18570939 | 0 | 0            |
| cov1_4_6_9_11  | 27.359  | -223.278 | 0.3721341 | 0 | -0.22293066 | 0 | 0            |
| cov1_3_4_6_9   | 27.3622 | -223.28  | 0.3666349 | 0 | -0.1848494  | 0 | 0            |
| cov4_7_8_11    | 27.3793 | -226.798 | 0.3711802 | 0 | 0           | 0 | 0            |
| cov4_5_7_8     | 27.4049 | -226.811 | 0.3725894 | 0 | 0           | 0 | 0            |
| cov1_2_4_6_10  | 27.4585 | -223.328 | 0.3719372 | 0 | -0.17198682 | 0 | -0.049611705 |
| cov1_2_4_6_9   | 27.4664 | -223.332 | 0.3716789 | 0 | -0.1709101  | 0 | -0.050515397 |
| cov4_5_7_11    | 27.4852 | -226.851 | 0.3714426 | 0 | 0           | 0 | 0            |
| cov4_5_8_11    | 27.4864 | -226.852 | 0.3713152 | 0 | 0           | 0 | 0            |
| cov5_7_8_11    | 27.5058 | -226.861 | 0.3715764 | 0 | 0           | 0 | 0            |
| cov1_2_3_4_6   | 27.7218 | -223.459 | 0.3697737 | 0 | -0.17409043 | 0 | -0.048812462 |
| cov1_3_4_6_8   | 27.7491 | -223.473 | 0.3629792 | 0 | -0.18647825 | 0 | 0            |
| cov1_4_6_7_10  | 27.7686 | -223.483 | 0.3706225 | 0 | -0.19673762 | 0 | 0            |
| cov1_4_6_7_9   | 27.7965 | -223.497 | 0.3702837 | 0 | -0.1961168  | 0 | 0            |
| cov1_4_6_8_10  | 27.8004 | -223.499 | 0.3705169 | 0 | -0.1965483  | 0 | 0            |
| cov1_5_7_8_11  | 27.8166 | -223.507 | 0.3787219 | 0 | -0.21919849 | 0 | 0            |
| cov1_4_6_8_9   | 27.8279 | -223.512 | 0.3701792 | 0 | -0.19593342 | 0 | 0            |
| cov1_3_4_6_7   | 27.829  | -223.513 | 0.3634847 | 0 | -0.1871861  | 0 | 0            |
| cov1_3_6_8_11  | 27.8569 | -223.527 | 0.3623314 | 0 | -0.18020643 | 0 | 0            |

|                |         |          |           |   |             |   |              |
|----------------|---------|----------|-----------|---|-------------|---|--------------|
| cov1_4_6_9_10  | 27.8635 | -223.53  | 0.3698693 | 0 | -0.1963139  | 0 | 0            |
| cov1_3_6_8_9   | 27.8886 | -223.543 | 0.3602511 | 0 | -0.14335862 | 0 | 0            |
| cov1_3_4_5_11  | 27.8943 | -223.546 | 0.3734958 | 0 | -0.18523175 | 0 | 0            |
| cov1_3_6_8_10  | 27.9056 | -223.551 | 0.3606843 | 0 | -0.14424331 | 0 | 0            |
| cov1_3_6_7_11  | 27.9432 | -223.57  | 0.3628451 | 0 | -0.18073744 | 0 | 0            |
| cov1_4_5_7_11  | 27.9561 | -223.576 | 0.3785683 | 0 | -0.21720561 | 0 | 0            |
| cov1_3_6_7_9   | 27.9637 | -223.58  | 0.3607379 | 0 | -0.14335106 | 0 | 0            |
| cov1_4_6_7_11  | 27.9663 | -223.582 | 0.3750555 | 0 | -0.24534059 | 0 | 0            |
| cov1_3_5_7_11  | 27.9744 | -223.586 | 0.3757174 | 0 | -0.19971587 | 0 | 0            |
| cov1_3_6_7_10  | 27.979  | -223.588 | 0.3611851 | 0 | -0.14426852 | 0 | 0            |
| cov1_3_5_9_11  | 27.9944 | -223.596 | 0.3730145 | 0 | -0.17435503 | 0 | 0            |
| cov1_3_5_10_11 | 28.0012 | -223.599 | 0.3731071 | 0 | -0.17541834 | 0 | 0            |
| cov1_3_5_8_11  | 28.0028 | -223.6   | 0.3749509 | 0 | -0.19495271 | 0 | 0            |
| cov1_4_6_8_11  | 28.0165 | -223.607 | 0.3748823 | 0 | -0.24428284 | 0 | 0            |
| cov1_4_5_8_11  | 28.017  | -223.607 | 0.3784058 | 0 | -0.21616988 | 0 | 0            |
| cov1_5_7_9_11  | 28.0199 | -223.608 | 0.378545  | 0 | -0.20796168 | 0 | 0            |
| cov1_5_7_10_11 | 28.0244 | -223.611 | 0.3786262 | 0 | -0.20851963 | 0 | 0            |
| cov1_2_3_5_11  | 28.0285 | -223.613 | 0.373317  | 0 | -0.18416483 | 0 | -0.000718127 |
| cov1_2_5_7_11  | 28.0595 | -223.628 | 0.3789403 | 0 | -0.2168183  | 0 | -0.003305284 |
| cov1_2_4_6_7   | 28.0868 | -223.642 | 0.3734206 | 0 | -0.17847158 | 0 | -0.061656642 |
| cov1_5_8_9_11  | 28.0878 | -223.642 | 0.3783856 | 0 | -0.20698733 | 0 | 0            |
| cov1_5_8_10_11 | 28.0924 | -223.645 | 0.3784671 | 0 | -0.20754504 | 0 | 0            |
| cov1_2_4_6_8   | 28.0994 | -223.648 | 0.3733327 | 0 | -0.17812834 | 0 | -0.062000615 |
| cov1_2_5_8_11  | 28.1274 | -223.662 | 0.378781  | 0 | -0.21585148 | 0 | -0.003289898 |
| cov1_3_6_9_10  | 28.1693 | -223.683 | 0.3641616 | 0 | -0.1476607  | 0 | 0            |
| cov1_2_3_6_10  | 28.1715 | -223.684 | 0.3641269 | 0 | -0.15536332 | 0 | 0.008909252  |
| cov1_2_3_6_9   | 28.1731 | -223.685 | 0.3637354 | 0 | -0.15383658 | 0 | 0.008115927  |
| cov1_2_4_5_11  | 28.2061 | -223.701 | 0.3776418 | 0 | -0.1736761  | 0 | -0.037557541 |
| cov1_2_3_4_11  | 28.2542 | -223.726 | 0.3745275 | 0 | -0.11460267 | 0 | -0.051887452 |
| cov1_2_3_6_11  | 28.2569 | -223.727 | 0.3669349 | 0 | -0.19154873 | 0 | 0.001114775  |
| cov1_4_6_7_8   | 28.3343 | -223.766 | 0.3712233 | 0 | -0.21723117 | 0 | 0            |
| cov1_4_5_9_11  | 28.3469 | -223.772 | 0.3758697 | 0 | -0.19018621 | 0 | 0            |
| cov1_4_5_10_11 | 28.3493 | -223.773 | 0.3759572 | 0 | -0.19036828 | 0 | 0            |
| cov1_3_6_7_8   | 28.3501 | -223.773 | 0.3588673 | 0 | -0.15184233 | 0 | 0            |
| cov1_3_4_9_11  | 28.3536 | -223.775 | 0.371319  | 0 | -0.12223614 | 0 | 0            |
| cov1_3_4_10_11 | 28.3563 | -223.777 | 0.3715436 | 0 | -0.12279828 | 0 | 0            |
| cov1_6_7_10_11 | 28.4372 | -223.817 | 0.3729787 | 0 | -0.18498964 | 0 | 0            |
| cov1_6_7_9_11  | 28.4558 | -223.826 | 0.3725665 | 0 | -0.18432211 | 0 | 0            |
| cov1_6_8_10_11 | 28.5184 | -223.858 | 0.3727805 | 0 | -0.18347612 | 0 | 0            |
| cov1_6_8_9_11  | 28.5369 | -223.867 | 0.3723681 | 0 | -0.18281092 | 0 | 0            |
| cov1_3_4_8_11  | 28.5417 | -223.869 | 0.3687778 | 0 | -0.12859482 | 0 | 0            |
| cov1_2_4_10_11 | 28.5671 | -223.882 | 0.3773215 | 0 | -0.10473001 | 0 | -0.059177697 |
| cov1_2_4_9_11  | 28.5673 | -223.882 | 0.3771638 | 0 | -0.10409093 | 0 | -0.059763937 |
| cov1_3_4_7_11  | 28.5821 | -223.889 | 0.3692128 | 0 | -0.13007248 | 0 | 0            |
| cov1_2_5_9_11  | 28.5895 | -223.893 | 0.3760001 | 0 | -0.19246329 | 0 | -0.002030797 |
| cov1_5_9_10_11 | 28.5903 | -223.894 | 0.3759102 | 0 | -0.19402535 | 0 | 0            |
| cov1_2_5_10_11 | 28.5936 | -223.895 | 0.3760746 | 0 | -0.19313201 | 0 | -0.001917999 |

|                |         |          |           |   |              |   |              |
|----------------|---------|----------|-----------|---|--------------|---|--------------|
| cov1_2_3_6_8   | 28.6408 | -223.919 | 0.358408  | 0 | -0.15200103  | 0 | 0.007019556  |
| cov1_2_4_7_11  | 28.6885 | -223.943 | 0.3793181 | 0 | -0.12134282  | 0 | -0.066410823 |
| cov1_2_4_8_11  | 28.7221 | -223.959 | 0.3791903 | 0 | -0.12068718  | 0 | -0.066627877 |
| cov1_6_7_8_10  | 28.7475 | -223.972 | 0.3690607 | 0 | -0.15772151  | 0 | 0            |
| cov1_2_3_6_7   | 28.7523 | -223.975 | 0.3588451 | 0 | -0.15172498  | 0 | 0.006988859  |
| cov1_6_7_8_9   | 28.7834 | -223.99  | 0.3686072 | 0 | -0.15669033  | 0 | 0            |
| cov1_4_5_7_8   | 28.7938 | -223.995 | 0.3744729 | 0 | -0.16915538  | 0 | 0            |
| cov1_3_5_7_8   | 28.8358 | -224.016 | 0.3714866 | 0 | -0.1507875   | 0 | 0            |
| cov1_3_4_5_9   | 28.8564 | -224.027 | 0.3710988 | 0 | -0.13563921  | 0 | 0            |
| cov1_3_4_5_10  | 28.8575 | -224.027 | 0.3712066 | 0 | -0.13582182  | 0 | 0            |
| cov1_2_3_4_5   | 28.8701 | -224.033 | 0.3722831 | 0 | -0.13446925  | 0 | -0.019866747 |
| cov1_5_7_8_9   | 28.8794 | -224.038 | 0.374397  | 0 | -0.15874665  | 0 | 0            |
| cov1_5_7_8_10  | 28.8802 | -224.039 | 0.3744812 | 0 | -0.15885665  | 0 | 0            |
| cov1_4_7_10_11 | 28.8854 | -224.041 | 0.3762241 | 0 | -0.13438941  | 0 | 0            |
| cov1_4_7_9_11  | 28.9019 | -224.049 | 0.3759891 | 0 | -0.13416156  | 0 | 0            |
| cov1_6_9_10_11 | 28.9143 | -224.056 | 0.3703526 | 0 | -0.17329365  | 0 | 0            |
| cov1_3_4_5_8   | 28.9151 | -224.056 | 0.3705896 | 0 | -0.14470105  | 0 | 0            |
| cov1_3_4_5_7   | 28.9227 | -224.06  | 0.3712408 | 0 | -0.14846665  | 0 | 0            |
| cov1_2_5_7_8   | 28.9273 | -224.062 | 0.3745907 | 0 | -0.17323735  | 0 | 0.002904157  |
| cov1_4_8_10_11 | 28.9292 | -224.063 | 0.3760831 | 0 | -0.13393709  | 0 | 0            |
| cov1_2_6_10_11 | 28.9317 | -224.064 | 0.3704485 | 0 | -0.17599113  | 0 | 0.003011917  |
| cov1_4_8_9_11  | 28.9456 | -224.071 | 0.3758487 | 0 | -0.13371091  | 0 | 0            |
| cov1_2_6_9_11  | 28.9501 | -224.073 | 0.3700753 | 0 | -0.17457752  | 0 | 0.001973857  |
| cov1_4_5_7_10  | 28.9522 | -224.075 | 0.3743099 | 0 | -0.15469135  | 0 | 0            |
| cov1_4_5_7_9   | 28.9538 | -224.075 | 0.3742157 | 0 | -0.1548677   | 0 | 0            |
| cov1_2_4_5_7   | 28.96   | -224.078 | 0.3751501 | 0 | -0.15043772  | 0 | -0.022033854 |
| cov1_4_5_8_10  | 28.983  | -224.09  | 0.3742082 | 0 | -0.1543837   | 0 | 0            |
| cov1_4_5_8_9   | 28.9845 | -224.091 | 0.374114  | 0 | -0.1545595   | 0 | 0            |
| cov1_2_4_5_8   | 28.9861 | -224.091 | 0.3750705 | 0 | -0.14947422  | 0 | -0.022777418 |
| cov1_2_4_5_10  | 28.996  | -224.096 | 0.3742257 | 0 | -0.12926145  | 0 | -0.027066798 |
| cov1_2_4_5_9   | 28.9962 | -224.097 | 0.374134  | 0 | -0.12917199  | 0 | -0.0272274   |
| cov1_2_3_5_9   | 29.0114 | -224.104 | 0.3707335 | 0 | -0.1409419   | 0 | 0.00536653   |
| cov1_2_3_5_10  | 29.0144 | -224.106 | 0.370825  | 0 | -0.14149202  | 0 | 0.005529236  |
| cov1_3_5_7_9   | 29.0161 | -224.106 | 0.3713591 | 0 | -0.13934288  | 0 | 0            |
| cov1_3_5_8_9   | 29.0175 | -224.107 | 0.3707075 | 0 | -0.13577139  | 0 | 0            |
| cov1_3_5_9_10  | 29.018  | -224.107 | 0.3709344 | 0 | -0.136945    | 0 | 0            |
| cov1_3_5_7_10  | 29.0192 | -224.108 | 0.3714841 | 0 | -0.13994888  | 0 | 0            |
| cov1_3_5_8_10  | 29.021  | -224.109 | 0.3708305 | 0 | -0.13641895  | 0 | 0            |
| cov1_2_3_5_8   | 29.0611 | -224.129 | 0.370717  | 0 | -0.15058442  | 0 | 0.004561989  |
| cov1_2_3_5_7   | 29.0616 | -224.129 | 0.3713833 | 0 | -0.15418347  | 0 | 0.004334615  |
| cov1_4_5_9_10  | 29.0976 | -224.147 | 0.3733251 | 0 | -0.15187572  | 0 | 0            |
| cov1_2_5_7_9   | 29.1039 | -224.15  | 0.3743834 | 0 | -0.16145171  | 0 | 0.003716372  |
| cov1_2_5_7_10  | 29.1045 | -224.151 | 0.374466  | 0 | -0.16168639  | 0 | 0.003922912  |
| cov1_5_7_9_10  | 29.1063 | -224.152 | 0.3745323 | 0 | -0.15837733  | 0 | 0            |
| cov1_3_8_9_11  | 29.1369 | -224.167 | 0.365981  | 0 | -0.072834804 | 0 | 0            |
| cov1_4_9_10_11 | 29.1385 | -224.168 | 0.3745728 | 0 | -0.1295885   | 0 | 0            |
| cov1_2_5_8_9   | 29.1418 | -224.169 | 0.3742874 | 0 | -0.16117333  | 0 | 0.003652933  |

|                |         |          |           |   |              |   |              |
|----------------|---------|----------|-----------|---|--------------|---|--------------|
| cov1_2_5_8_10  | 29.1425 | -224.17  | 0.3743696 | 0 | -0.16141499  | 0 | 0.003858224  |
| cov1_5_8_9_10  | 29.1442 | -224.171 | 0.3744339 | 0 | -0.15815236  | 0 | 0            |
| cov1_3_8_10_11 | 29.1545 | -224.176 | 0.3662639 | 0 | -0.073558    | 0 | 0            |
| cov1_6_7_9_10  | 29.1561 | -224.176 | 0.369112  | 0 | -0.15147643  | 0 | 0            |
| cov1_2_6_7_10  | 29.158  | -224.177 | 0.3690889 | 0 | -0.15803728  | 0 | 0.007563865  |
| cov1_3_7_9_11  | 29.181  | -224.189 | 0.3663937 | 0 | -0.073445169 | 0 | 0            |
| cov1_4_7_8_11  | 29.189  | -224.193 | 0.3766849 | 0 | -0.15576661  | 0 | 0            |
| cov1_2_3_4_10  | 29.1923 | -224.195 | 0.3713262 | 0 | -0.063263227 | 0 | -0.039182048 |
| cov1_2_3_4_9   | 29.1973 | -224.197 | 0.3711242 | 0 | -0.06241269  | 0 | -0.039699313 |
| cov1_2_6_7_9   | 29.1976 | -224.197 | 0.3686601 | 0 | -0.15615787  | 0 | 0.006513901  |
| cov1_3_7_10_11 | 29.1981 | -224.197 | 0.3666875 | 0 | -0.074171855 | 0 | 0            |
| cov1_6_8_9_10  | 29.2069 | -224.202 | 0.3689904 | 0 | -0.15086686  | 0 | 0            |
| cov1_2_6_8_10  | 29.2091 | -224.203 | 0.36897   | 0 | -0.15736273  | 0 | 0.007485153  |
| cov1_3_4_8_10  | 29.2472 | -224.222 | 0.3660948 | 0 | -0.075088856 | 0 | 0            |
| cov1_2_6_8_9   | 29.2481 | -224.222 | 0.3685411 | 0 | -0.15549222  | 0 | 0.006438556  |
| cov1_3_4_8_9   | 29.2492 | -224.223 | 0.3658061 | 0 | -0.074315959 | 0 | 0            |
| cov1_2_3_4_8   | 29.2547 | -224.226 | 0.3678837 | 0 | -0.067300789 | 0 | -0.040565916 |
| cov1_3_4_7_10  | 29.2915 | -224.244 | 0.3664887 | 0 | -0.07571362  | 0 | 0            |
| cov1_3_4_7_9   | 29.2946 | -224.246 | 0.3661921 | 0 | -0.074934697 | 0 | 0            |
| cov1_2_3_9_11  | 29.3    | -224.248 | 0.368879  | 0 | -0.082562465 | 0 | 0.005954218  |
| cov1_3_9_10_11 | 29.3029 | -224.25  | 0.3691912 | 0 | -0.077822501 | 0 | 0            |
| cov1_2_3_4_7   | 29.3058 | -224.251 | 0.3682987 | 0 | -0.067907946 | 0 | -0.041298252 |
| cov1_2_3_10_11 | 29.3101 | -224.253 | 0.3691421 | 0 | -0.083633717 | 0 | 0.00655142   |
| cov1_2_5_9_10  | 29.3261 | -224.261 | 0.3732745 | 0 | -0.15853701  | 0 | 0.003212284  |
| cov1_3_4_7_8   | 29.3402 | -224.269 | 0.3654401 | 0 | -0.08658464  | 0 | 0            |
| cov1_3_7_8_11  | 29.3625 | -224.28  | 0.3651094 | 0 | -0.084205137 | 0 | 0            |
| cov1_2_6_9_10  | 29.3744 | -224.286 | 0.3678385 | 0 | -0.15435023  | 0 | 0.006589008  |
| cov1_3_4_9_10  | 29.4281 | -224.312 | 0.3691708 | 0 | -0.079915299 | 0 | 0            |
| cov1_2_4_7_10  | 29.4363 | -224.317 | 0.3742739 | 0 | -0.067270821 | 0 | -0.048788025 |
| cov1_2_4_8_10  | 29.4481 | -224.322 | 0.3742075 | 0 | -0.067274326 | 0 | -0.049138125 |
| cov1_2_4_7_9   | 29.4489 | -224.323 | 0.3740845 | 0 | -0.066489311 | 0 | -0.049603746 |
| cov1_2_4_8_9   | 29.4604 | -224.329 | 0.3740178 | 0 | -0.066496167 | 0 | -0.049945454 |
| cov1_2_4_9_10  | 29.4619 | -224.329 | 0.3739332 | 0 | -0.066937184 | 0 | -0.050241412 |
| cov1_2_3_8_11  | 29.5404 | -224.369 | 0.3645653 | 0 | -0.087198483 | 0 | 0.005268944  |
| cov1_2_4_7_8   | 29.5752 | -224.386 | 0.3748505 | 0 | -0.07867479  | 0 | -0.058791858 |
| cov1_4_7_8_10  | 29.603  | -224.4   | 0.3723814 | 0 | -0.091249638 | 0 | 0            |
| cov1_2_3_7_11  | 29.606  | -224.401 | 0.364946  | 0 | -0.087950283 | 0 | 0.005164598  |
| cov1_4_7_8_9   | 29.631  | -224.414 | 0.3721306 | 0 | -0.090973458 | 0 | 0            |
| cov2_3_4_9_11  | 29.6902 | -224.444 | 0.3728775 | 0 | 0            | 0 | -0.086694972 |
| cov2_3_4_10_11 | 29.7363 | -224.467 | 0.373187  | 0 | 0            | 0 | -0.087038387 |
| cov2_3_4_8_9   | 29.7481 | -224.472 | 0.3678168 | 0 | 0            | 0 | -0.06735246  |
| cov2_3_4_8_10  | 29.7786 | -224.488 | 0.3681294 | 0 | 0            | 0 | -0.068055115 |
| cov2_3_4_7_9   | 29.7957 | -224.496 | 0.3682305 | 0 | 0            | 0 | -0.068112057 |
| cov1_6_7_8_11  | 29.7985 | -224.498 | 0.3739249 | 0 | -0.19949192  | 0 | 0            |
| cov2_3_4_7_10  | 29.826  | -224.511 | 0.3685519 | 0 | 0            | 0 | -0.068807121 |
| cov1_4_7_9_10  | 29.827  | -224.512 | 0.3724418 | 0 | -0.090897787 | 0 | 0            |
| cov2_3_4_6_9   | 29.8344 | -224.516 | 0.3712109 | 0 | 0            | 0 | -0.084484768 |

|                |         |          |           |   |              |   |              |
|----------------|---------|----------|-----------|---|--------------|---|--------------|
| cov1_4_8_9_10  | 29.8447 | -224.521 | 0.3723605 | 0 | -0.091077008 | 0 | 0            |
| cov2_3_4_5_9   | 29.8706 | -224.534 | 0.3711737 | 0 | 0            | 0 | -0.070600735 |
| cov2_3_4_6_10  | 29.8768 | -224.537 | 0.3716135 | 0 | 0            | 0 | -0.084501598 |
| cov2_3_4_5_10  | 29.8836 | -224.54  | 0.3714729 | 0 | 0            | 0 | -0.070652147 |
| cov2_4_5_6_9   | 29.9082 | -224.553 | 0.3736233 | 0 | 0            | 0 | -0.10359283  |
| cov2_4_5_6_10  | 29.9218 | -224.559 | 0.3740098 | 0 | 0            | 0 | -0.1031318   |
| cov2_4_5_9_11  | 29.9553 | -224.576 | 0.3763067 | 0 | 0            | 0 | -0.10105443  |
| cov2_3_4_9_10  | 29.9669 | -224.582 | 0.3716253 | 0 | 0            | 0 | -0.074229866 |
| cov1_3_7_8_9   | 29.9696 | -224.583 | 0.3624352 | 0 | -0.028504854 | 0 | 0            |
| cov2_4_5_10_11 | 29.9718 | -224.584 | 0.3765981 | 0 | 0            | 0 | -0.10069153  |
| cov1_3_7_8_10  | 29.9759 | -224.586 | 0.3627701 | 0 | -0.029345655 | 0 | 0            |
| cov2_3_4_5_8   | 30.0187 | -224.608 | 0.3661439 | 0 | 0            | 0 | -0.074788702 |
| cov2_3_4_8_11  | 30.0367 | -224.617 | 0.3686532 | 0 | 0            | 0 | -0.092398679 |
| cov2_3_4_7_8   | 30.042  | -224.619 | 0.3676167 | 0 | 0            | 0 | -0.082168036 |
| cov2_3_6_8_9   | 30.0642 | -224.631 | 0.3626354 | 0 | 0            | 0 | -0.042619729 |
| cov2_3_8_9_11  | 30.0937 | -224.645 | 0.3649196 | 0 | 0            | 0 | -0.036324938 |
| cov2_3_4_5_7   | 30.0945 | -224.646 | 0.3665604 | 0 | 0            | 0 | -0.075974975 |
| cov1_2_3_8_9   | 30.0953 | -224.646 | 0.361791  | 0 | -0.038397488 | 0 | 0.012070364  |
| cov1_2_3_8_10  | 30.1001 | -224.648 | 0.3621093 | 0 | -0.039655675 | 0 | 0.012580097  |
| cov2_3_4_7_11  | 30.1006 | -224.649 | 0.3690759 | 0 | 0            | 0 | -0.093592041 |
| cov2_4_7_8_9   | 30.1203 | -224.659 | 0.3749845 | 0 | 0            | 0 | -0.089054622 |
| cov2_3_6_8_10  | 30.1206 | -224.659 | 0.3630617 | 0 | 0            | 0 | -0.042492042 |
| cov1_3_8_9_10  | 30.1245 | -224.661 | 0.3623178 | 0 | -0.028305425 | 0 | 0            |
| cov2_3_6_7_9   | 30.1348 | -224.666 | 0.3630103 | 0 | 0            | 0 | -0.042534327 |
| cov2_4_7_8_10  | 30.1397 | -224.668 | 0.3753182 | 0 | 0            | 0 | -0.089300176 |
| cov2_3_8_10_11 | 30.143  | -224.67  | 0.3652211 | 0 | 0            | 0 | -0.036614857 |
| cov2_4_7_9_11  | 30.1503 | -224.674 | 0.3768693 | 0 | 0            | 0 | -0.10089615  |
| cov2_3_7_9_11  | 30.1507 | -224.674 | 0.3653039 | 0 | 0            | 0 | -0.036662052 |
| cov1_2_3_7_9   | 30.1587 | -224.678 | 0.3621345 | 0 | -0.038500561 | 0 | 0.012052922  |
| cov2_3_4_5_11  | 30.1614 | -224.679 | 0.3739808 | 0 | 0            | 0 | -0.10732735  |
| cov1_2_3_7_10  | 30.1626 | -224.68  | 0.3624658 | 0 | -0.03975739  | 0 | 0.012553689  |
| cov2_3_4_6_8   | 30.1644 | -224.681 | 0.3669893 | 0 | 0            | 0 | -0.08723638  |
| cov2_4_8_9_11  | 30.1711 | -224.684 | 0.3767514 | 0 | 0            | 0 | -0.10094956  |
| cov2_4_7_10_11 | 30.186  | -224.691 | 0.377156  | 0 | 0            | 0 | -0.10082102  |
| cov1_3_7_9_10  | 30.1871 | -224.692 | 0.3626686 | 0 | -0.028435047 | 0 | 0            |
| cov2_3_6_7_10  | 30.1905 | -224.694 | 0.3634464 | 0 | 0            | 0 | -0.042402701 |
| cov2_4_6_9_11  | 30.1961 | -224.696 | 0.3757775 | 0 | 0            | 0 | -0.10446272  |
| cov2_3_7_10_11 | 30.2001 | -224.698 | 0.3656146 | 0 | 0            | 0 | -0.036946517 |
| cov2_4_8_10_11 | 30.2066 | -224.702 | 0.377037  | 0 | 0            | 0 | -0.10087754  |
| cov2_4_9_10_11 | 30.2199 | -224.708 | 0.3761561 | 0 | 0            | 0 | -0.10097125  |
| cov2_4_6_10_11 | 30.2353 | -224.716 | 0.3761175 | 0 | 0            | 0 | -0.10407045  |
| cov2_3_4_6_7   | 30.2361 | -224.716 | 0.3674188 | 0 | 0            | 0 | -0.087933801 |
| cov2_4_6_7_9   | 30.2393 | -224.718 | 0.374972  | 0 | 0            | 0 | -0.098328196 |
| cov1_2_6_7_11  | 30.2436 | -224.72  | 0.3741861 | 0 | -0.19266122  | 0 | -0.00112352  |
| cov2_4_5_7_9   | 30.2466 | -224.722 | 0.3746263 | 0 | 0            | 0 | -0.085881194 |
| cov2_4_5_9_10  | 30.251  | -224.724 | 0.3745159 | 0 | 0            | 0 | -0.086173349 |
| cov2_4_5_7_10  | 30.2525 | -224.725 | 0.3749426 | 0 | 0            | 0 | -0.085648324 |

|                |         |          |           |   |              |   |              |
|----------------|---------|----------|-----------|---|--------------|---|--------------|
| cov2_4_6_8_9   | 30.2526 | -224.725 | 0.374897  | 0 | 0            | 0 | -0.098604139 |
| cov2_4_5_8_9   | 30.2548 | -224.726 | 0.3745723 | 0 | 0            | 0 | -0.086162553 |
| cov2_3_7_8_9   | 30.2584 | -224.728 | 0.3628398 | 0 | 0            | 0 | -0.018421009 |
| cov2_4_5_8_10  | 30.2608 | -224.729 | 0.3748698 | 0 | 0            | 0 | -0.085925569 |
| cov2_4_6_9_10  | 30.2679 | -224.732 | 0.3747127 | 0 | 0            | 0 | -0.099299697 |
| cov2_4_6_7_10  | 30.2719 | -224.734 | 0.3753599 | 0 | 0            | 0 | -0.098024054 |
| cov3_4_5_8_9   | 30.2754 | -224.736 | 0.3609198 | 0 | 0            | 0 | 0            |
| cov3_5_6_8_9   | 30.2796 | -224.738 | 0.3578786 | 0 | 0            | 0 | 0            |
| cov2_3_6_9_11  | 30.2846 | -224.741 | 0.3687104 | 0 | 0            | 0 | -0.051247826 |
| cov2_4_6_8_10  | 30.2854 | -224.741 | 0.3752839 | 0 | 0            | 0 | -0.098305618 |
| cov2_3_7_8_10  | 30.2861 | -224.741 | 0.3632248 | 0 | 0            | 0 | -0.019163334 |
| cov3_4_5_8_10  | 30.2976 | -224.747 | 0.3612717 | 0 | 0            | 0 | 0            |
| cov1_2_6_8_11  | 30.3157 | -224.756 | 0.3739961 | 0 | -0.19120737  | 0 | -0.001093292 |
| cov2_4_7_9_10  | 30.3285 | -224.763 | 0.3751706 | 0 | 0            | 0 | -0.088845391 |
| cov3_5_6_8_10  | 30.3285 | -224.763 | 0.3583876 | 0 | 0            | 0 | 0            |
| cov1_7_8_10_11 | 30.3295 | -224.763 | 0.3754648 | 0 | -0.078074319 | 0 | 0            |
| cov2_4_8_9_10  | 30.3404 | -224.769 | 0.3750973 | 0 | 0            | 0 | -0.089188686 |
| cov2_3_6_10_11 | 30.3446 | -224.771 | 0.3691178 | 0 | 0            | 0 | -0.050835832 |
| cov3_4_5_7_9   | 30.3517 | -224.774 | 0.3612578 | 0 | 0            | 0 | 0            |
| cov1_7_8_9_11  | 30.3533 | -224.775 | 0.3751227 | 0 | -0.077471315 | 0 | 0            |
| cov3_5_8_9_11  | 30.361  | -224.779 | 0.3612599 | 0 | 0            | 0 | 0            |
| cov3_5_6_7_9   | 30.3735 | -224.785 | 0.3583933 | 0 | 0            | 0 | 0            |
| cov3_4_5_7_10  | 30.3736 | -224.785 | 0.3616185 | 0 | 0            | 0 | 0            |
| cov1_2_3_7_8   | 30.3819 | -224.789 | 0.3607805 | 0 | -0.047907113 | 0 | 0.010997118  |
| cov2_3_5_8_9   | 30.3915 | -224.794 | 0.3634208 | 0 | 0            | 0 | -0.024848221 |
| cov2_3_5_9_11  | 30.4023 | -224.8   | 0.369277  | 0 | 0            | 0 | -0.042101446 |
| cov2_3_9_10_11 | 30.4025 | -224.8   | 0.3692005 | 0 | 0            | 0 | -0.040359895 |
| cov3_5_8_10_11 | 30.4057 | -224.801 | 0.3615972 | 0 | 0            | 0 | 0            |
| cov2_3_8_9_10  | 30.4099 | -224.803 | 0.3626445 | 0 | 0            | 0 | -0.018202846 |
| cov3_5_7_8_9   | 30.4126 | -224.805 | 0.3613169 | 0 | 0            | 0 | 0            |
| cov3_5_6_7_10  | 30.4215 | -224.809 | 0.3589061 | 0 | 0            | 0 | 0            |
| cov2_3_4_6_11  | 30.4224 | -224.81  | 0.3741466 | 0 | 0            | 0 | -0.10484545  |
| cov2_3_5_8_10  | 30.4244 | -224.811 | 0.3636951 | 0 | 0            | 0 | -0.024874502 |
| cov3_5_7_9_11  | 30.434  | -224.815 | 0.3616114 | 0 | 0            | 0 | 0            |
| cov3_5_7_8_10  | 30.4444 | -224.821 | 0.3616462 | 0 | 0            | 0 | 0            |
| cov2_3_5_10_11 | 30.4501 | -224.823 | 0.3695991 | 0 | 0            | 0 | -0.041833137 |
| cov2_3_5_7_9   | 30.4522 | -224.825 | 0.3638543 | 0 | 0            | 0 | -0.025642336 |
| cov1_2_3_9_10  | 30.4662 | -224.832 | 0.3662527 | 0 | -0.040989366 | 0 | 0.012472227  |
| cov2_3_7_9_10  | 30.4745 | -224.836 | 0.3629968 | 0 | 0            | 0 | -0.018302326 |
| cov3_5_7_10_11 | 30.4786 | -224.838 | 0.3619582 | 0 | 0            | 0 | 0            |
| cov3_7_8_9_11  | 30.4804 | -224.839 | 0.3622812 | 0 | 0            | 0 | 0            |
| cov2_3_6_9_10  | 30.4815 | -224.839 | 0.3672933 | 0 | 0            | 0 | -0.044199629 |
| cov2_3_5_6_9   | 30.4841 | -224.84  | 0.3669544 | 0 | 0            | 0 | -0.043097811 |
| cov2_3_5_7_10  | 30.4852 | -224.841 | 0.3641341 | 0 | 0            | 0 | -0.025655124 |
| cov2_3_4_5_6   | 30.4914 | -224.844 | 0.3720933 | 0 | 0            | 0 | -0.10258296  |
| cov3_6_7_8_9   | 30.4921 | -224.844 | 0.3619732 | 0 | 0            | 0 | 0            |
| cov3_7_8_9_10  | 30.4943 | -224.846 | 0.3620951 | 0 | 0            | 0 | 0            |

|                |         |          |           |   |              |   |              |
|----------------|---------|----------|-----------|---|--------------|---|--------------|
| cov3_4_7_8_9   | 30.4945 | -224.846 | 0.3620822 | 0 | 0            | 0 | 0            |
| cov2_3_5_6_10  | 30.5297 | -224.863 | 0.3673779 | 0 | 0            | 0 | -0.04258494  |
| cov3_7_8_10_11 | 30.5376 | -224.867 | 0.3626285 | 0 | 0            | 0 | 0            |
| cov3_6_7_8_10  | 30.5449 | -224.871 | 0.3624291 | 0 | 0            | 0 | 0            |
| cov3_4_7_8_10  | 30.5452 | -224.871 | 0.3624498 | 0 | 0            | 0 | 0            |
| cov3_5_8_9_10  | 30.5558 | -224.876 | 0.36115   | 0 | 0            | 0 | 0            |
| cov1_7_9_10_11 | 30.5619 | -224.879 | 0.3754047 | 0 | -0.077046243 | 0 | 0            |
| cov1_2_7_10_11 | 30.5651 | -224.881 | 0.3753365 | 0 | -0.081974684 | 0 | 0.005610374  |
| cov1_2_7_9_11  | 30.591  | -224.894 | 0.3750232 | 0 | -0.080655557 | 0 | 0.004699291  |
| cov1_2_6_7_8   | 30.6198 | -224.908 | 0.3699337 | 0 | -0.16769826  | 0 | 0.003818943  |
| cov1_8_9_10_11 | 30.6221 | -224.909 | 0.3752501 | 0 | -0.076280859 | 0 | 0            |
| cov3_6_8_9_11  | 30.6244 | -224.911 | 0.3622182 | 0 | 0            | 0 | 0            |
| cov3_4_8_9_11  | 30.6245 | -224.911 | 0.361966  | 0 | 0            | 0 | 0            |
| cov1_2_8_10_11 | 30.6253 | -224.911 | 0.3751723 | 0 | -0.081216948 | 0 | 0.005621173  |
| cov3_5_7_9_10  | 30.6268 | -224.912 | 0.3615072 | 0 | 0            | 0 | 0            |
| cov3_8_9_10_11 | 30.6273 | -224.912 | 0.3620504 | 0 | 0            | 0 | 0            |
| cov3_6_8_9_10  | 30.6392 | -224.918 | 0.3617784 | 0 | 0            | 0 | 0            |
| cov3_4_6_8_9   | 30.6397 | -224.918 | 0.3617092 | 0 | 0            | 0 | 0            |
| cov2_3_7_8_11  | 30.6403 | -224.919 | 0.3635079 | 0 | 0            | 0 | -0.045244101 |
| cov3_4_8_9_10  | 30.6403 | -224.919 | 0.3618777 | 0 | 0            | 0 | 0            |
| cov1_2_8_9_11  | 30.6512 | -224.924 | 0.374867  | 0 | -0.079896576 | 0 | 0.004704898  |
| cov3_6_8_10_11 | 30.6795 | -224.938 | 0.3626226 | 0 | 0            | 0 | 0            |
| cov3_4_8_10_11 | 30.6819 | -224.939 | 0.3623035 | 0 | 0            | 0 | 0            |
| cov3_4_5_9_11  | 30.6835 | -224.94  | 0.3666081 | 0 | 0            | 0 | 0            |
| cov3_6_7_9_11  | 30.6896 | -224.943 | 0.3625941 | 0 | 0            | 0 | 0            |
| cov3_4_7_9_11  | 30.6912 | -224.944 | 0.3623094 | 0 | 0            | 0 | 0            |
| cov3_4_6_8_10  | 30.6924 | -224.945 | 0.3621786 | 0 | 0            | 0 | 0            |
| cov3_7_9_10_11 | 30.6936 | -224.945 | 0.3624011 | 0 | 0            | 0 | 0            |
| cov3_6_7_9_10  | 30.7068 | -224.952 | 0.3621295 | 0 | 0            | 0 | 0            |
| cov3_4_7_9_10  | 30.7072 | -224.952 | 0.3622268 | 0 | 0            | 0 | 0            |
| cov3_4_6_7_9   | 30.7075 | -224.952 | 0.3620865 | 0 | 0            | 0 | 0            |
| cov3_4_5_10_11 | 30.708  | -224.952 | 0.3670326 | 0 | 0            | 0 | 0            |
| cov2_3_5_9_10  | 30.73   | -224.963 | 0.3684032 | 0 | 0            | 0 | -0.033809931 |
| cov2_3_6_7_8   | 30.7332 | -224.965 | 0.3613433 | 0 | 0            | 0 | -0.04595098  |
| cov3_6_7_10_11 | 30.7443 | -224.971 | 0.3630064 | 0 | 0            | 0 | 0            |
| cov3_4_7_10_11 | 30.7485 | -224.973 | 0.3626568 | 0 | 0            | 0 | 0            |
| cov2_3_6_8_11  | 30.7585 | -224.978 | 0.3627821 | 0 | 0            | 0 | -0.050463521 |
| cov3_4_6_7_10  | 30.7593 | -224.978 | 0.3625664 | 0 | 0            | 0 | 0            |
| cov3_4_5_6_9   | 30.7759 | -224.986 | 0.3652347 | 0 | 0            | 0 | 0            |
| cov2_3_5_8_11  | 30.7915 | -224.994 | 0.3632254 | 0 | 0            | 0 | -0.044780989 |
| cov3_4_5_6_10  | 30.7929 | -224.995 | 0.3657227 | 0 | 0            | 0 | 0            |
| cov2_4_7_8_11  | 30.8215 | -225.009 | 0.3780832 | 0 | 0            | 0 | -0.12516584  |
| cov3_4_5_9_10  | 30.8469 | -225.022 | 0.3665173 | 0 | 0            | 0 | 0            |
| cov3_5_6_9_11  | 30.8485 | -225.023 | 0.3656642 | 0 | 0            | 0 | 0            |
| cov2_4_5_7_8   | 30.8487 | -225.023 | 0.3763412 | 0 | 0            | 0 | -0.11249867  |
| cov2_3_6_7_11  | 30.8489 | -225.023 | 0.3631624 | 0 | 0            | 0 | -0.050497366 |
| cov2_3_5_7_8   | 30.8507 | -225.024 | 0.3627571 | 0 | 0            | 0 | -0.03821541  |



|                |         |          |           |   |              |   |              |
|----------------|---------|----------|-----------|---|--------------|---|--------------|
| cov2_4_5_7_11  | 30.8723 | -225.035 | 0.3783969 | 0 | 0            | 0 | -0.12617857  |
| cov3_5_9_10_11 | 30.8763 | -225.037 | 0.366593  | 0 | 0            | 0 | 0            |
| cov2_3_5_7_11  | 30.8767 | -225.037 | 0.3636395 | 0 | 0            | 0 | -0.045797275 |
| cov2_4_5_6_11  | 30.8785 | -225.038 | 0.3780242 | 0 | 0            | 0 | -0.12808439  |
| cov2_4_5_8_11  | 30.8795 | -225.038 | 0.3782792 | 0 | 0            | 0 | -0.12607409  |
| cov3_5_6_10_11 | 30.8897 | -225.043 | 0.3661298 | 0 | 0            | 0 | 0            |
| cov2_3_5_6_8   | 30.8927 | -225.045 | 0.3608222 | 0 | 0            | 0 | -0.043721116 |
| cov2_4_6_7_8   | 30.9224 | -225.06  | 0.3766916 | 0 | 0            | 0 | -0.11678839  |
| cov3_5_6_9_10  | 30.9588 | -225.078 | 0.3651655 | 0 | 0            | 0 | 0            |
| cov2_3_5_6_7   | 30.9924 | -225.095 | 0.3613727 | 0 | 0            | 0 | -0.044284556 |
| cov1_2_9_10_11 | 31.0119 | -225.104 | 0.3729225 | 0 | -0.071637346 | 0 | 0.005529431  |
| cov2_4_6_7_11  | 31.0342 | -225.116 | 0.3784418 | 0 | 0            | 0 | -0.12149512  |
| cov3_4_5_7_8   | 31.0418 | -225.119 | 0.3586174 | 0 | 0            | 0 | 0            |
| cov2_4_6_8_11  | 31.0446 | -225.121 | 0.3783147 | 0 | 0            | 0 | -0.12149657  |
| cov2_4_5_6_8   | 31.0461 | -225.121 | 0.3762929 | 0 | 0            | 0 | -0.12009994  |
| cov2_4_5_6_7   | 31.048  | -225.122 | 0.3763812 | 0 | 0            | 0 | -0.11980288  |
| cov3_6_9_10_11 | 31.0522 | -225.125 | 0.3672358 | 0 | 0            | 0 | 0            |
| cov3_4_6_9_11  | 31.0567 | -225.127 | 0.3672193 | 0 | 0            | 0 | 0            |
| cov3_4_9_10_11 | 31.0718 | -225.134 | 0.3668281 | 0 | 0            | 0 | 0            |
| cov3_4_6_9_10  | 31.0937 | -225.145 | 0.3668555 | 0 | 0            | 0 | 0            |
| cov3_4_5_8_11  | 31.0954 | -225.146 | 0.3583932 | 0 | 0            | 0 | 0            |
| cov3_4_6_10_11 | 31.1026 | -225.15  | 0.3676718 | 0 | 0            | 0 | 0            |
| cov3_4_5_6_8   | 31.1546 | -225.176 | 0.3577551 | 0 | 0            | 0 | 0            |
| cov3_5_7_8_11  | 31.2019 | -225.199 | 0.3587255 | 0 | 0            | 0 | 0            |
| cov3_4_5_7_11  | 31.2093 | -225.203 | 0.3586761 | 0 | 0            | 0 | 0            |
| cov3_5_6_7_8   | 31.2594 | -225.228 | 0.3579468 | 0 | 0            | 0 | 0            |
| cov3_4_5_6_7   | 31.2706 | -225.234 | 0.3582302 | 0 | 0            | 0 | 0            |
| cov1_2_7_8_10  | 31.2894 | -225.243 | 0.3711556 | 0 | -0.042778647 | 0 | 0.01138235   |
| cov2_6_7_8_9   | 31.3018 | -225.249 | 0.3718122 | 0 | 0            | 0 | -0.048174833 |
| cov1_7_8_9_10  | 31.3138 | -225.255 | 0.3713938 | 0 | -0.03266855  | 0 | 0            |
| cov2_6_7_8_10  | 31.3232 | -225.26  | 0.3723342 | 0 | 0            | 0 | -0.047824534 |
| cov3_5_6_8_11  | 31.3307 | -225.264 | 0.3583815 | 0 | 0            | 0 | 0            |
| cov1_2_7_8_9   | 31.335  | -225.266 | 0.3708082 | 0 | -0.041165157 | 0 | 0.010495795  |
| cov2_5_7_8_9   | 31.3446 | -225.271 | 0.3734087 | 0 | 0            | 0 | -0.047598272 |
| cov2_5_7_8_10  | 31.3688 | -225.283 | 0.3737646 | 0 | 0            | 0 | -0.047179126 |
| cov3_6_7_8_11  | 31.3839 | -225.29  | 0.3609402 | 0 | 0            | 0 | 0            |
| cov3_4_6_7_8   | 31.3907 | -225.294 | 0.3608455 | 0 | 0            | 0 | 0            |
| cov2_7_8_9_11  | 31.3933 | -225.295 | 0.3741947 | 0 | 0            | 0 | -0.039818853 |
| cov2_7_8_10_11 | 31.4079 | -225.302 | 0.3745695 | 0 | 0            | 0 | -0.039814514 |
| cov2_5_7_9_11  | 31.4367 | -225.317 | 0.3748163 | 0 | 0            | 0 | -0.054099238 |
| cov3_5_6_7_11  | 31.4398 | -225.318 | 0.3588737 | 0 | 0            | 0 | 0            |
| cov2_6_7_9_11  | 31.4597 | -225.328 | 0.3734874 | 0 | 0            | 0 | -0.051935136 |
| cov2_3_5_6_11  | 31.4693 | -225.333 | 0.3703761 | 0 | 0            | 0 | -0.06084832  |
| cov2_5_6_7_9   | 31.471  | -225.334 | 0.3729381 | 0 | 0            | 0 | -0.053813495 |
| cov2_5_7_10_11 | 31.4719 | -225.334 | 0.3751457 | 0 | 0            | 0 | -0.053448447 |
| cov2_5_8_9_11  | 31.4744 | -225.336 | 0.3746778 | 0 | 0            | 0 | -0.05386151  |
| cov3_4_7_8_11  | 31.4895 | -225.343 | 0.3593888 | 0 | 0            | 0 | 0            |

|                |         |          |           |   |              |   |              |
|----------------|---------|----------|-----------|---|--------------|---|--------------|
| cov2_6_7_10_11 | 31.4902 | -225.344 | 0.3739369 | 0 | 0            | 0 | -0.051326379 |
| cov3_4_6_8_11  | 31.4978 | -225.347 | 0.3610737 | 0 | 0            | 0 | 0            |
| cov2_6_8_9_11  | 31.4994 | -225.348 | 0.3733245 | 0 | 0            | 0 | -0.051605755 |
| cov2_5_6_8_9   | 31.5023 | -225.35  | 0.3728375 | 0 | 0            | 0 | -0.053732954 |
| cov2_5_6_7_10  | 31.5032 | -225.35  | 0.3733651 | 0 | 0            | 0 | -0.053085738 |
| cov2_5_8_10_11 | 31.5094 | -225.353 | 0.3750036 | 0 | 0            | 0 | -0.053216315 |
| cov1_2_7_9_10  | 31.515  | -225.356 | 0.3711682 | 0 | -0.041892866 | 0 | 0.011102534  |
| cov2_6_8_10_11 | 31.5296 | -225.363 | 0.3737744 | 0 | 0            | 0 | -0.050999199 |
| cov2_5_6_8_10  | 31.5346 | -225.366 | 0.3732656 | 0 | 0            | 0 | -0.05300891  |
| cov2_6_7_9_10  | 31.5422 | -225.369 | 0.3721058 | 0 | 0            | 0 | -0.046384941 |
| cov1_2_8_9_10  | 31.5476 | -225.372 | 0.3710761 | 0 | -0.041754465 | 0 | 0.011030126  |
| cov2_5_7_9_10  | 31.5534 | -225.375 | 0.3736145 | 0 | 0            | 0 | -0.047083518 |
| cov2_6_8_9_10  | 31.5747 | -225.386 | 0.3719972 | 0 | 0            | 0 | -0.046263807 |
| cov2_5_8_9_10  | 31.5832 | -225.39  | 0.373516  | 0 | 0            | 0 | -0.047062034 |
| cov3_4_6_7_11  | 31.586  | -225.391 | 0.3614491 | 0 | 0            | 0 | 0            |
| cov2_5_6_9_11  | 31.5884 | -225.393 | 0.3725995 | 0 | 0            | 0 | -0.055648741 |
| cov2_7_9_10_11 | 31.5993 | -225.398 | 0.3744252 | 0 | 0            | 0 | -0.039341705 |
| cov1_2_7_8_11  | 31.6032 | -225.4   | 0.3762371 | 0 | -0.099207307 | 0 | 0.002017982  |
| cov2_5_6_9_10  | 31.6063 | -225.402 | 0.3720797 | 0 | 0            | 0 | -0.053038828 |
| cov2_5_6_10_11 | 31.626  | -225.411 | 0.3729858 | 0 | 0            | 0 | -0.054818346 |
| cov2_5_9_10_11 | 31.64   | -225.418 | 0.3733683 | 0 | 0            | 0 | -0.051186906 |
| cov2_8_9_10_11 | 31.6409 | -225.419 | 0.3742774 | 0 | 0            | 0 | -0.038949317 |
| cov2_6_9_10_11 | 31.6482 | -225.423 | 0.3719735 | 0 | 0            | 0 | -0.049374385 |
| cov2_7_8_9_10  | 31.6635 | -225.43  | 0.3719988 | 0 | 0            | 0 | -0.022071381 |
| cov4_5_7_8_10  | 31.6898 | -225.443 | 0.3710366 | 0 | 0            | 0 | 0            |
| cov4_5_7_8_9   | 31.7021 | -225.449 | 0.3705778 | 0 | 0            | 0 | 0            |
| cov4_5_7_9_10  | 31.8779 | -225.537 | 0.3709146 | 0 | 0            | 0 | 0            |
| cov4_5_8_9_10  | 31.8973 | -225.547 | 0.370814  | 0 | 0            | 0 | 0            |
| cov4_5_7_10_11 | 31.9012 | -225.549 | 0.3713644 | 0 | 0            | 0 | 0            |
| cov4_6_7_8_9   | 31.9058 | -225.551 | 0.3715239 | 0 | 0            | 0 | 0            |
| cov4_5_6_7_10  | 31.9082 | -225.553 | 0.3710773 | 0 | 0            | 0 | 0            |
| cov4_5_7_9_11  | 31.9113 | -225.554 | 0.3709182 | 0 | 0            | 0 | 0            |
| cov4_6_7_8_10  | 31.9188 | -225.558 | 0.3720297 | 0 | 0            | 0 | 0            |
| cov4_5_6_7_9   | 31.9202 | -225.559 | 0.3706097 | 0 | 0            | 0 | 0            |
| cov4_5_8_10_11 | 31.9221 | -225.559 | 0.3712379 | 0 | 0            | 0 | 0            |
| cov4_5_6_8_10  | 31.9276 | -225.562 | 0.3709798 | 0 | 0            | 0 | 0            |
| cov4_5_8_9_11  | 31.9324 | -225.565 | 0.3707914 | 0 | 0            | 0 | 0            |
| cov4_5_6_8_9   | 31.9395 | -225.568 | 0.3705126 | 0 | 0            | 0 | 0            |
| cov4_5_6_9_10  | 31.9415 | -225.569 | 0.3701763 | 0 | 0            | 0 | 0            |
| cov4_5_9_10_11 | 31.9417 | -225.569 | 0.3703487 | 0 | 0            | 0 | 0            |
| cov4_7_8_9_10  | 31.9458 | -225.571 | 0.3713205 | 0 | 0            | 0 | 0            |
| cov4_7_8_9_11  | 31.9551 | -225.576 | 0.3707811 | 0 | 0            | 0 | 0            |
| cov4_5_6_10_11 | 31.9722 | -225.585 | 0.3705018 | 0 | 0            | 0 | 0            |
| cov4_7_8_10_11 | 31.9746 | -225.586 | 0.3712086 | 0 | 0            | 0 | 0            |
| cov4_5_6_9_11  | 31.9835 | -225.59  | 0.3700636 | 0 | 0            | 0 | 0            |
| cov5_7_8_9_10  | 31.9999 | -225.598 | 0.3712072 | 0 | 0            | 0 | 0            |
| cov7_8_9_10_11 | 32.003  | -225.6   | 0.3713262 | 0 | 0            | 0 | 0            |

|                  |         |          |           |   |             |   |              |
|------------------|---------|----------|-----------|---|-------------|---|--------------|
| cov6_7_8_9_10    | 32.0036 | -225.6   | 0.3712689 | 0 | 0           | 0 | 0            |
| cov5_7_8_9_11    | 32.0228 | -225.61  | 0.3712379 | 0 | 0           | 0 | 0            |
| cov5_6_7_8_9     | 32.0294 | -225.613 | 0.3708545 | 0 | 0           | 0 | 0            |
| cov6_7_8_9_11    | 32.0299 | -225.613 | 0.3713188 | 0 | 0           | 0 | 0            |
| cov5_7_8_10_11   | 32.0313 | -225.614 | 0.3716852 | 0 | 0           | 0 | 0            |
| cov5_6_7_8_10    | 32.0363 | -225.617 | 0.3713426 | 0 | 0           | 0 | 0            |
| cov6_7_8_10_11   | 32.0419 | -225.619 | 0.3717931 | 0 | 0           | 0 | 0            |
| cov4_6_7_9_10    | 32.0815 | -225.639 | 0.3718645 | 0 | 0           | 0 | 0            |
| cov4_6_8_9_10    | 32.105  | -225.651 | 0.3717805 | 0 | 0           | 0 | 0            |
| cov4_6_7_9_11    | 32.1067 | -225.652 | 0.371736  | 0 | 0           | 0 | 0            |
| cov4_6_7_10_11   | 32.1189 | -225.658 | 0.3721841 | 0 | 0           | 0 | 0            |
| cov4_6_8_9_11    | 32.1301 | -225.663 | 0.3716091 | 0 | 0           | 0 | 0            |
| cov4_6_8_10_11   | 32.1423 | -225.67  | 0.3720567 | 0 | 0           | 0 | 0            |
| cov4_7_9_10_11   | 32.1446 | -225.671 | 0.3710629 | 0 | 0           | 0 | 0            |
| cov4_8_9_10_11   | 32.1678 | -225.682 | 0.3709328 | 0 | 0           | 0 | 0            |
| cov4_6_9_10_11   | 32.1772 | -225.687 | 0.3708989 | 0 | 0           | 0 | 0            |
| cov5_7_9_10_11   | 32.2114 | -225.704 | 0.3715476 | 0 | 0           | 0 | 0            |
| cov6_7_9_10_11   | 32.2167 | -225.707 | 0.3716953 | 0 | 0           | 0 | 0            |
| cov5_6_7_9_10    | 32.2196 | -225.708 | 0.371247  | 0 | 0           | 0 | 0            |
| cov5_8_9_10_11   | 32.2425 | -225.72  | 0.3714205 | 0 | 0           | 0 | 0            |
| cov5_6_7_9_11    | 32.2437 | -225.72  | 0.3714133 | 0 | 0           | 0 | 0            |
| cov6_8_9_10_11   | 32.2471 | -225.722 | 0.3715651 | 0 | 0           | 0 | 0            |
| cov5_6_8_9_10    | 32.2489 | -225.723 | 0.3711534 | 0 | 0           | 0 | 0            |
| cov5_6_7_10_11   | 32.2525 | -225.725 | 0.3718637 | 0 | 0           | 0 | 0            |
| cov5_6_8_9_11    | 32.2745 | -225.736 | 0.3712814 | 0 | 0           | 0 | 0            |
| cov5_6_8_10_11   | 32.2834 | -225.74  | 0.3717317 | 0 | 0           | 0 | 0            |
| cov3_4_5_6_11    | 32.3274 | -225.762 | 0.3680499 | 0 | 0           | 0 | 0            |
| cov5_6_9_10_11   | 32.3613 | -225.779 | 0.3702854 | 0 | 0           | 0 | 0            |
| cov2_5_6_7_8     | 32.6428 | -225.92  | 0.375625  | 0 | 0           | 0 | -0.069507748 |
| cov2_5_7_8_11    | 32.6531 | -225.925 | 0.3760584 | 0 | 0           | 0 | -0.077870075 |
| cov2_5_6_7_11    | 32.8177 | -226.007 | 0.3768157 | 0 | 0           | 0 | -0.071656259 |
| cov2_5_6_8_11    | 32.8456 | -226.021 | 0.3766672 | 0 | 0           | 0 | -0.071396742 |
| cov1_5_6_7_8_11  | 32.9772 | -222.577 | 0.3764746 | 0 | -0.32321234 | 0 | 0            |
| cov1_3_5_6_9_11  | 33.197  | -222.687 | 0.3703675 | 0 | -0.26471032 | 0 | 0            |
| cov1_5_6_7_9_11  | 33.2105 | -222.694 | 0.376048  | 0 | -0.29950002 | 0 | 0            |
| cov1_3_5_6_10_11 | 33.2144 | -222.696 | 0.3705501 | 0 | -0.26561142 | 0 | 0            |
| cov2_6_7_8_11    | 33.2153 | -226.206 | 0.3753779 | 0 | 0           | 0 | -0.058502515 |
| cov1_5_6_7_10_11 | 33.2222 | -222.699 | 0.3762078 | 0 | -0.29989523 | 0 | 0            |
| cov1_3_4_5_6_11  | 33.2791 | -222.728 | 0.3713492 | 0 | -0.28159137 | 0 | 0            |
| cov1_5_6_8_9_11  | 33.2994 | -222.738 | 0.3758496 | 0 | -0.29773852 | 0 | 0            |
| cov1_3_5_6_7_11  | 33.3016 | -222.739 | 0.3735745 | 0 | -0.29820432 | 0 | 0            |
| cov1_5_6_8_10_11 | 33.311  | -222.744 | 0.3760099 | 0 | -0.29814197 | 0 | 0            |
| cov1_4_5_6_7_11  | 33.3327 | -222.755 | 0.3766239 | 0 | -0.31522008 | 0 | 0            |
| cov1_3_5_6_8_11  | 33.3376 | -222.757 | 0.3725981 | 0 | -0.29190329 | 0 | 0            |
| cov1_2_3_5_6_11  | 33.3562 | -222.766 | 0.3711881 | 0 | -0.2798559  | 0 | -0.003799649 |
| cov1_2_5_6_7_11  | 33.3812 | -222.779 | 0.3769131 | 0 | -0.31337585 | 0 | -0.006413968 |
| cov1_4_5_6_8_11  | 33.4134 | -222.795 | 0.3764276 | 0 | -0.31329995 | 0 | 0            |

|                  |         |          |           |   |             |   |              |
|------------------|---------|----------|-----------|---|-------------|---|--------------|
| cov1_2_5_6_8_11  | 33.4688 | -222.823 | 0.3767162 | 0 | -0.31159066 | 0 | -0.006372646 |
| cov1_3_4_6_9_11  | 33.549  | -222.863 | 0.3689571 | 0 | -0.21593436 | 0 | 0            |
| cov1_3_4_6_10_11 | 33.5587 | -222.868 | 0.3692642 | 0 | -0.21657534 | 0 | 0            |
| cov1_4_5_6_9_11  | 33.6301 | -222.903 | 0.3734301 | 0 | -0.27950478 | 0 | 0            |
| cov1_2_4_5_6_11  | 33.6312 | -222.904 | 0.3756135 | 0 | -0.26987513 | 0 | -0.037117126 |
| cov1_4_5_6_10_11 | 33.6374 | -222.907 | 0.3735957 | 0 | -0.27960085 | 0 | 0            |
| cov1_5_6_7_8_9   | 33.6483 | -222.912 | 0.3719414 | 0 | -0.26683508 | 0 | 0            |
| cov1_5_6_7_8_10  | 33.6536 | -222.915 | 0.372117  | 0 | -0.26701389 | 0 | 0            |
| cov1_2_3_4_6_11  | 33.719  | -222.948 | 0.3725141 | 0 | -0.20537233 | 0 | -0.052888162 |
| cov4_5_6_7_8     | 33.7299 | -226.463 | 0.3737345 | 0 | 0           | 0 | 0            |
| cov4_6_7_8_11    | 33.7306 | -226.464 | 0.3736185 | 0 | 0           | 0 | 0            |
| cov1_3_5_6_7_8   | 33.7665 | -222.972 | 0.3693949 | 0 | -0.2660232  | 0 | 0            |
| cov1_4_5_6_7_8   | 33.7884 | -222.983 | 0.3725683 | 0 | -0.28342413 | 0 | 0            |
| cov1_2_5_6_9_11  | 33.8113 | -222.994 | 0.3734385 | 0 | -0.28116405 | 0 | -0.004320387 |
| cov1_5_6_9_10_11 | 33.8154 | -222.996 | 0.3733024 | 0 | -0.28402261 | 0 | 0            |
| cov1_2_4_6_9_11  | 33.8205 | -222.999 | 0.3748007 | 0 | -0.19724067 | 0 | -0.058146839 |
| cov1_2_5_6_10_11 | 33.8228 | -223     | 0.3735887 | 0 | -0.28183738 | 0 | -0.004006355 |
| cov1_2_4_6_10_11 | 33.825  | -223.001 | 0.3750283 | 0 | -0.19806295 | 0 | -0.057371683 |
| cov1_2_5_6_7_8   | 33.8599 | -223.018 | 0.3726201 | 0 | -0.28524261 | 0 | -0.001182492 |
| cov1_3_4_5_6_9   | 33.8674 | -223.022 | 0.3685326 | 0 | -0.23547717 | 0 | 0            |
| cov1_3_4_5_6_10  | 33.8744 | -223.026 | 0.3687388 | 0 | -0.23579837 | 0 | 0            |
| cov4_5_6_7_11    | 33.92   | -226.558 | 0.3737727 | 0 | 0           | 0 | 0            |
| cov4_5_6_8_11    | 33.9302 | -226.564 | 0.3736422 | 0 | 0           | 0 | 0            |
| cov1_4_5_6_7_9   | 33.9579 | -223.067 | 0.3720858 | 0 | -0.25742019 | 0 | 0            |
| cov1_4_5_6_7_10  | 33.9596 | -223.068 | 0.3722679 | 0 | -0.25734705 | 0 | 0            |
| cov1_3_5_6_7_9   | 33.9682 | -223.072 | 0.3691008 | 0 | -0.24266178 | 0 | 0            |
| cov1_2_3_5_6_9   | 33.9747 | -223.076 | 0.3681693 | 0 | -0.23933505 | 0 | 0.002258886  |
| cov1_3_5_6_9_10  | 33.9753 | -223.076 | 0.3682723 | 0 | -0.23761059 | 0 | 0            |
| cov1_3_5_6_8_9   | 33.9758 | -223.076 | 0.3682291 | 0 | -0.23767281 | 0 | 0            |
| cov1_3_5_6_7_10  | 33.9778 | -223.077 | 0.369355  | 0 | -0.24350656 | 0 | 0            |
| cov1_2_3_5_6_10  | 33.985  | -223.081 | 0.3683533 | 0 | -0.24011856 | 0 | 0.002603468  |
| cov1_3_5_6_8_10  | 33.9865 | -223.082 | 0.3684811 | 0 | -0.23855076 | 0 | 0            |
| cov5_6_7_8_11    | 33.9979 | -226.597 | 0.3738914 | 0 | 0           | 0 | 0            |
| cov1_3_4_6_8_11  | 34.0028 | -223.09  | 0.3664842 | 0 | -0.21911123 | 0 | 0            |
| cov1_4_5_6_8_9   | 34.0064 | -223.092 | 0.3719606 | 0 | -0.25651173 | 0 | 0            |
| cov1_4_5_6_8_10  | 34.0082 | -223.092 | 0.3721413 | 0 | -0.2564381  | 0 | 0            |
| cov1_2_3_4_5_6   | 34.0395 | -223.108 | 0.3700973 | 0 | -0.2406622  | 0 | -0.019886517 |
| cov1_5_6_7_9_10  | 34.0529 | -223.115 | 0.3722295 | 0 | -0.26131131 | 0 | 0            |
| cov1_2_5_6_7_9   | 34.0552 | -223.116 | 0.3721632 | 0 | -0.26200981 | 0 | 0.000516847  |
| cov1_3_4_6_7_11  | 34.0578 | -223.117 | 0.3670652 | 0 | -0.22060906 | 0 | 0            |
| cov1_2_4_5_6_9   | 34.058  | -223.117 | 0.3718911 | 0 | -0.22882303 | 0 | -0.028118703 |
| cov1_2_5_6_7_10  | 34.0604 | -223.119 | 0.3723293 | 0 | -0.26247442 | 0 | 0.000915413  |
| cov1_2_4_5_6_10  | 34.062  | -223.119 | 0.3720674 | 0 | -0.22910459 | 0 | -0.027826024 |
| cov1_4_6_7_10_11 | 34.0658 | -223.121 | 0.3741489 | 0 | -0.22936194 | 0 | 0            |
| cov1_4_6_7_9_11  | 34.0807 | -223.129 | 0.3738418 | 0 | -0.22894462 | 0 | 0            |
| cov1_3_4_5_6_8   | 34.0883 | -223.132 | 0.3686158 | 0 | -0.25204026 | 0 | 0            |
| cov1_3_4_5_6_7   | 34.0925 | -223.135 | 0.369476  | 0 | -0.25720613 | 0 | 0            |

|                  |         |          |           |   |             |   |              |
|------------------|---------|----------|-----------|---|-------------|---|--------------|
| cov1_5_6_8_9_10  | 34.1093 | -223.143 | 0.3721051 | 0 | -0.26051954 | 0 | 0            |
| cov1_2_5_6_8_9   | 34.1115 | -223.144 | 0.3720414 | 0 | -0.26116416 | 0 | 0.000450536  |
| cov1_2_5_6_8_10  | 34.1168 | -223.147 | 0.3722088 | 0 | -0.26163896 | 0 | 0.000844949  |
| cov1_4_6_8_10_11 | 34.1266 | -223.152 | 0.3739716 | 0 | -0.2283251  | 0 | 0            |
| cov1_2_4_5_6_7   | 34.1299 | -223.153 | 0.3733665 | 0 | -0.25930917 | 0 | -0.021824184 |
| cov1_4_6_8_9_11  | 34.1414 | -223.159 | 0.3736663 | 0 | -0.22791284 | 0 | 0            |
| cov1_2_3_4_6_9   | 34.154  | -223.165 | 0.3686873 | 0 | -0.16779375 | 0 | -0.038241989 |
| cov1_2_3_4_6_10  | 34.1552 | -223.166 | 0.3689788 | 0 | -0.16890715 | 0 | -0.037623379 |
| cov1_3_6_8_9_11  | 34.1606 | -223.169 | 0.3638324 | 0 | -0.17630805 | 0 | 0            |
| cov1_4_5_6_9_10  | 34.1649 | -223.171 | 0.3710621 | 0 | -0.25200584 | 0 | 0            |
| cov1_2_4_5_6_8   | 34.1713 | -223.174 | 0.3732719 | 0 | -0.25754997 | 0 | -0.022795299 |
| cov1_2_3_5_6_7   | 34.1728 | -223.175 | 0.3695708 | 0 | -0.26086755 | 0 | 0.000371447  |
| cov1_2_3_5_6_8   | 34.176  | -223.176 | 0.3686904 | 0 | -0.25594504 | 0 | 0.000673869  |
| cov1_3_6_8_10_11 | 34.1887 | -223.183 | 0.3642118 | 0 | -0.17695072 | 0 | 0            |
| cov1_2_4_6_7_11  | 34.1925 | -223.185 | 0.3775891 | 0 | -0.21136501 | 0 | -0.06802833  |
| cov1_3_6_7_9_11  | 34.2111 | -223.194 | 0.3643973 | 0 | -0.17706919 | 0 | 0            |
| cov1_3_4_6_8_9   | 34.2317 | -223.204 | 0.3638154 | 0 | -0.17899218 | 0 | 0            |
| cov1_3_4_6_8_10  | 34.2357 | -223.206 | 0.3642234 | 0 | -0.18002425 | 0 | 0            |
| cov1_2_4_6_8_11  | 34.2366 | -223.207 | 0.3774306 | 0 | -0.21022519 | 0 | -0.068289523 |
| cov1_3_6_7_10_11 | 34.238  | -223.207 | 0.3647899 | 0 | -0.17773371 | 0 | 0            |
| cov4_5_7_8_11    | 34.2547 | -226.726 | 0.371344  | 0 | 0           | 0 | 0            |
| cov1_3_4_6_7_9   | 34.2842 | -223.23  | 0.364353  | 0 | -0.17975752 | 0 | 0            |
| cov1_3_4_6_7_10  | 34.2864 | -223.232 | 0.364774  | 0 | -0.18082097 | 0 | 0            |
| cov1_3_6_9_10_11 | 34.2883 | -223.232 | 0.3667062 | 0 | -0.18173161 | 0 | 0            |
| cov1_2_3_6_9_11  | 34.2937 | -223.235 | 0.3664909 | 0 | -0.18398231 | 0 | 0.003030752  |
| cov1_2_3_6_10_11 | 34.314  | -223.245 | 0.3668234 | 0 | -0.18508846 | 0 | 0.003790641  |
| cov1_2_5_6_9_10  | 34.3391 | -223.258 | 0.3709472 | 0 | -0.25703707 | 0 | 5.63E-05     |
| cov1_4_6_9_10_11 | 34.3571 | -223.267 | 0.3722957 | 0 | -0.22289454 | 0 | 0            |
| cov1_3_4_6_9_10  | 34.3655 | -223.271 | 0.3668271 | 0 | -0.18512524 | 0 | 0            |
| cov1_4_6_7_8_10  | 34.3854 | -223.281 | 0.3704096 | 0 | -0.20203273 | 0 | 0            |
| cov1_4_6_7_8_9   | 34.4132 | -223.295 | 0.3700732 | 0 | -0.20141556 | 0 | 0            |
| cov1_2_4_6_7_10  | 34.4163 | -223.296 | 0.3723477 | 0 | -0.17304032 | 0 | -0.047525131 |
| cov1_2_4_6_7_9   | 34.4262 | -223.301 | 0.3720762 | 0 | -0.17190953 | 0 | -0.048512741 |
| cov1_2_4_6_8_10  | 34.4406 | -223.309 | 0.3722626 | 0 | -0.17266228 | 0 | -0.047998253 |
| cov1_3_4_6_7_8   | 34.4489 | -223.313 | 0.3633089 | 0 | -0.1925344  | 0 | 0            |
| cov1_2_4_6_8_9   | 34.4501 | -223.313 | 0.3719931 | 0 | -0.17154341 | 0 | -0.04897383  |
| cov1_2_4_6_9_10  | 34.4706 | -223.324 | 0.3718073 | 0 | -0.17142802 | 0 | -0.049766961 |
| cov1_2_3_4_6_8   | 34.4927 | -223.335 | 0.3657963 | 0 | -0.16804481 | 0 | -0.04203143  |
| cov1_3_6_7_8_11  | 34.5458 | -223.361 | 0.3627044 | 0 | -0.18658241 | 0 | 0            |
| cov1_2_3_4_6_7   | 34.5599 | -223.368 | 0.3663665 | 0 | -0.16843528 | 0 | -0.04300239  |
| cov1_4_6_7_8_11  | 34.5719 | -223.374 | 0.3748511 | 0 | -0.25074692 | 0 | 0            |
| cov1_3_6_7_8_9   | 34.5762 | -223.376 | 0.3605802 | 0 | -0.14905361 | 0 | 0            |
| cov1_3_6_7_8_10  | 34.5913 | -223.384 | 0.3610245 | 0 | -0.14996995 | 0 | 0            |
| cov1_2_4_6_7_8   | 34.7058 | -223.441 | 0.373189  | 0 | -0.18393769 | 0 | -0.061222619 |
| cov1_4_5_7_8_11  | 34.7317 | -223.454 | 0.3784729 | 0 | -0.21707671 | 0 | 0            |
| cov1_3_5_7_8_11  | 34.7515 | -223.464 | 0.3756621 | 0 | -0.19983645 | 0 | 0            |
| cov1_4_6_7_9_10  | 34.7828 | -223.48  | 0.370511  | 0 | -0.19632581 | 0 | 0            |

|                  |         |          |           |   |             |   |              |
|------------------|---------|----------|-----------|---|-------------|---|--------------|
| cov1_5_7_8_9_11  | 34.7991 | -223.488 | 0.3784635 | 0 | -0.20842865 | 0 | 0            |
| cov1_5_7_8_10_11 | 34.8034 | -223.49  | 0.3785404 | 0 | -0.20898453 | 0 | 0            |
| cov1_2_3_4_5_11  | 34.8104 | -223.493 | 0.3747196 | 0 | -0.16470609 | 0 | -0.02792117  |
| cov1_4_6_8_9_10  | 34.8147 | -223.496 | 0.3704053 | 0 | -0.19613796 | 0 | 0            |
| cov1_2_5_7_8_11  | 34.8345 | -223.506 | 0.3788381 | 0 | -0.2167817  | 0 | -0.003173018 |
| cov1_2_4_5_7_11  | 34.8618 | -223.519 | 0.3794338 | 0 | -0.19307827 | 0 | -0.029235953 |
| cov1_3_4_5_9_11  | 34.8658 | -223.521 | 0.3731623 | 0 | -0.17284195 | 0 | 0            |
| cov1_3_4_5_10_11 | 34.8717 | -223.524 | 0.3732646 | 0 | -0.17358866 | 0 | 0            |
| cov1_2_3_6_8_11  | 34.876  | -223.526 | 0.3622598 | 0 | -0.18187685 | 0 | 0.002209927  |
| cov1_3_4_5_7_11  | 34.8826 | -223.53  | 0.3753569 | 0 | -0.19684695 | 0 | 0            |
| cov1_2_3_6_8_9   | 34.8933 | -223.535 | 0.360031  | 0 | -0.14993525 | 0 | 0.008195168  |
| cov1_3_6_8_9_10  | 34.902  | -223.539 | 0.3604355 | 0 | -0.14362385 | 0 | 0            |
| cov1_3_4_5_8_11  | 34.9032 | -223.54  | 0.374594  | 0 | -0.19206849 | 0 | 0            |
| cov1_2_3_6_8_10  | 34.9077 | -223.542 | 0.3604504 | 0 | -0.15134304 | 0 | 0.008848159  |
| cov1_2_4_5_8_11  | 34.917  | -223.547 | 0.3792954 | 0 | -0.19146046 | 0 | -0.029956441 |
| cov1_4_5_7_9_11  | 34.9208 | -223.549 | 0.3782199 | 0 | -0.20394723 | 0 | 0            |
| cov1_4_5_7_10_11 | 34.9241 | -223.55  | 0.3783057 | 0 | -0.2042195  | 0 | 0            |
| cov1_3_5_7_9_11  | 34.9565 | -223.567 | 0.3755225 | 0 | -0.18932872 | 0 | 0            |
| cov1_2_3_6_7_11  | 34.9624 | -223.57  | 0.362777  | 0 | -0.18232091 | 0 | 0.002096402  |
| cov1_3_5_7_10_11 | 34.9626 | -223.57  | 0.3756313 | 0 | -0.1903147  | 0 | 0            |
| cov1_2_3_6_7_9   | 34.9684 | -223.573 | 0.3605175 | 0 | -0.14992205 | 0 | 0.008188369  |
| cov1_3_6_7_9_10  | 34.9759 | -223.576 | 0.3609388 | 0 | -0.14365056 | 0 | 0            |
| cov1_2_3_6_7_10  | 34.9811 | -223.579 | 0.3609504 | 0 | -0.15137787 | 0 | 0.008859693  |
| cov1_4_5_8_9_11  | 34.9813 | -223.579 | 0.3780529 | 0 | -0.20290082 | 0 | 0            |
| cov1_4_5_8_10_11 | 34.9845 | -223.581 | 0.3781405 | 0 | -0.20313651 | 0 | 0            |
| cov1_3_5_8_9_11  | 34.9859 | -223.581 | 0.3747619 | 0 | -0.18473379 | 0 | 0            |
| cov1_3_5_8_10_11 | 34.9923 | -223.584 | 0.3748693 | 0 | -0.18576274 | 0 | 0            |
| cov1_2_3_5_7_11  | 34.9939 | -223.585 | 0.3758039 | 0 | -0.19850565 | 0 | -0.001771977 |
| cov1_3_5_9_10_11 | 35.0129 | -223.595 | 0.3729673 | 0 | -0.17470776 | 0 | 0            |
| cov1_2_3_5_9_11  | 35.0146 | -223.596 | 0.3730113 | 0 | -0.17441166 | 0 | 8.16E-05     |
| cov1_2_3_5_10_11 | 35.0214 | -223.599 | 0.3731011 | 0 | -0.1755218  | 0 | 0.000151701  |
| cov1_2_3_5_8_11  | 35.0225 | -223.6   | 0.375022  | 0 | -0.19396503 | 0 | -0.001443991 |
| cov1_6_7_8_10_11 | 35.0292 | -223.603 | 0.3727724 | 0 | -0.19088482 | 0 | 0            |
| cov1_2_5_7_9_11  | 35.0387 | -223.608 | 0.3786382 | 0 | -0.20623939 | 0 | -0.002435053 |
| cov1_5_7_9_10_11 | 35.04   | -223.608 | 0.3785346 | 0 | -0.20805858 | 0 | 0            |
| cov1_2_5_7_10_11 | 35.0434 | -223.61  | 0.3787142 | 0 | -0.20691893 | 0 | -0.002303832 |
| cov1_6_7_8_9_11  | 35.0476 | -223.612 | 0.3723638 | 0 | -0.19022254 | 0 | 0            |
| cov1_2_3_4_9_11  | 35.0559 | -223.616 | 0.3738624 | 0 | -0.10400573 | 0 | -0.04526669  |
| cov1_2_3_4_10_11 | 35.0638 | -223.62  | 0.3740357 | 0 | -0.10476452 | 0 | -0.044984397 |
| cov1_2_5_8_9_11  | 35.1067 | -223.642 | 0.3784783 | 0 | -0.20527603 | 0 | -0.002419633 |
| cov1_5_8_9_10_11 | 35.1079 | -223.642 | 0.3783752 | 0 | -0.20708429 | 0 | 0            |
| cov1_2_5_8_10_11 | 35.1114 | -223.644 | 0.3785544 | 0 | -0.20595528 | 0 | -0.00228835  |
| cov1_2_3_6_9_10  | 35.1727 | -223.675 | 0.3639383 | 0 | -0.15454275 | 0 | 0.008553259  |
| cov1_2_4_5_9_11  | 35.1747 | -223.676 | 0.3772656 | 0 | -0.16097193 | 0 | -0.037408894 |
| cov1_2_4_5_10_11 | 35.1787 | -223.678 | 0.3773524 | 0 | -0.16148771 | 0 | -0.03725623  |
| cov1_2_3_4_8_11  | 35.2055 | -223.691 | 0.3722485 | 0 | -0.10919825 | 0 | -0.047988104 |
| cov1_2_3_4_7_11  | 35.233  | -223.705 | 0.3727511 | 0 | -0.11036347 | 0 | -0.048857007 |

|                  |         |          |           |   |             |   |              |
|------------------|---------|----------|-----------|---|-------------|---|--------------|
| cov1_3_4_8_9_11  | 35.3142 | -223.745 | 0.3694022 | 0 | -0.11722366 | 0 | 0            |
| cov1_3_4_8_10_11 | 35.3204 | -223.749 | 0.369654  | 0 | -0.11796685 | 0 | 0            |
| cov1_3_4_7_9_11  | 35.3396 | -223.758 | 0.3698585 | 0 | -0.11838672 | 0 | 0            |
| cov1_3_4_7_10_11 | 35.3451 | -223.761 | 0.3701204 | 0 | -0.11913175 | 0 | 0            |
| cov1_3_4_7_8_11  | 35.3579 | -223.767 | 0.3691734 | 0 | -0.13031714 | 0 | 0            |
| cov1_2_3_6_7_8   | 35.3591 | -223.768 | 0.3586886 | 0 | -0.15743159 | 0 | 0.006958057  |
| cov1_4_5_9_10_11 | 35.3669 | -223.772 | 0.3758851 | 0 | -0.19003172 | 0 | 0            |
| cov1_3_4_9_10_11 | 35.3693 | -223.773 | 0.3714108 | 0 | -0.12220838 | 0 | 0            |
| cov1_2_4_7_10_11 | 35.385  | -223.781 | 0.3785839 | 0 | -0.1098398  | 0 | -0.05652661  |
| cov1_2_4_7_9_11  | 35.386  | -223.781 | 0.3784132 | 0 | -0.10914824 | 0 | -0.057181337 |
| cov1_2_4_8_10_11 | 35.4235 | -223.8   | 0.3784609 | 0 | -0.10927279 | 0 | -0.056816171 |
| cov1_2_4_8_9_11  | 35.4244 | -223.8   | 0.3782906 | 0 | -0.10858386 | 0 | -0.057466439 |
| cov1_6_7_9_10_11 | 35.4367 | -223.807 | 0.3727905 | 0 | -0.18456885 | 0 | 0            |
| cov1_2_6_7_10_11 | 35.4556 | -223.816 | 0.3728874 | 0 | -0.18711044 | 0 | 0.00280837   |
| cov1_2_4_7_8_11  | 35.4629 | -223.82  | 0.3792189 | 0 | -0.12163993 | 0 | -0.066009644 |
| cov1_2_6_7_9_11  | 35.4753 | -223.826 | 0.3725105 | 0 | -0.18563459 | 0 | 0.001735978  |
| cov1_6_8_9_10_11 | 35.518  | -223.847 | 0.3725782 | 0 | -0.1830515  | 0 | 0            |
| cov1_2_6_8_10_11 | 35.5368 | -223.857 | 0.3726886 | 0 | -0.18561351 | 0 | 0.002830083  |
| cov1_2_6_8_9_11  | 35.5564 | -223.867 | 0.3723112 | 0 | -0.18414195 | 0 | 0.001760304  |
| cov1_2_4_9_10_11 | 35.5825 | -223.88  | 0.3772271 | 0 | -0.10420692 | 0 | -0.059315927 |
| cov1_2_5_9_10_11 | 35.6095 | -223.893 | 0.3759874 | 0 | -0.19256292 | 0 | -0.002086777 |
| cov1_4_7_8_10_11 | 35.6682 | -223.922 | 0.3761461 | 0 | -0.1348079  | 0 | 0            |
| cov1_4_7_8_9_11  | 35.6846 | -223.931 | 0.3759155 | 0 | -0.13459156 | 0 | 0            |
| cov1_3_4_5_7_8   | 35.7135 | -223.945 | 0.3711622 | 0 | -0.14831284 | 0 | 0            |
| cov1_4_5_7_8_10  | 35.7462 | -223.961 | 0.3742033 | 0 | -0.15486348 | 0 | 0            |
| cov1_4_5_7_8_9   | 35.7477 | -223.962 | 0.3741132 | 0 | -0.1550471  | 0 | 0            |
| cov1_2_4_5_7_8   | 35.7505 | -223.964 | 0.3750243 | 0 | -0.1503371  | 0 | -0.021689996 |
| cov1_6_7_8_9_10  | 35.7527 | -223.965 | 0.3688905 | 0 | -0.15724918 | 0 | 0            |
| cov1_2_6_7_8_10  | 35.7546 | -223.966 | 0.3688672 | 0 | -0.16378523 | 0 | 0.007535919  |
| cov1_2_6_7_8_9   | 35.7939 | -223.985 | 0.3684418 | 0 | -0.16191609 | 0 | 0.006490722  |
| cov1_3_5_7_8_9   | 35.8106 | -223.994 | 0.3712898 | 0 | -0.13971563 | 0 | 0            |
| cov1_3_5_7_8_10  | 35.8135 | -223.995 | 0.3714089 | 0 | -0.14029913 | 0 | 0            |
| cov1_2_3_4_5_9   | 35.8236 | -224     | 0.3719105 | 0 | -0.12035918 | 0 | -0.019825485 |
| cov1_2_3_4_5_10  | 35.8254 | -224.001 | 0.3720155 | 0 | -0.12070176 | 0 | -0.019706526 |
| cov1_2_3_5_7_8   | 35.8514 | -224.014 | 0.3712971 | 0 | -0.15412954 | 0 | 0.004478221  |
| cov1_3_4_5_8_9   | 35.8701 | -224.023 | 0.3703134 | 0 | -0.1312579  | 0 | 0            |
| cov1_3_4_5_8_10  | 35.8717 | -224.024 | 0.3704504 | 0 | -0.1316664  | 0 | 0            |
| cov1_3_4_5_9_10  | 35.8757 | -224.026 | 0.3711356 | 0 | -0.13542543 | 0 | 0            |
| cov1_3_4_5_7_9   | 35.8764 | -224.027 | 0.3709585 | 0 | -0.13485314 | 0 | 0            |
| cov1_3_4_5_7_10  | 35.8776 | -224.027 | 0.3710985 | 0 | -0.13522341 | 0 | 0            |
| cov1_2_3_4_5_8   | 35.8795 | -224.028 | 0.3712966 | 0 | -0.12822982 | 0 | -0.020369162 |
| cov1_2_3_4_5_7   | 35.8889 | -224.033 | 0.3719284 | 0 | -0.13222338 | 0 | -0.020050508 |
| cov1_2_5_7_8_9   | 35.8962 | -224.036 | 0.374274  | 0 | -0.16170524 | 0 | 0.003834778  |
| cov1_2_5_7_8_10  | 35.8967 | -224.037 | 0.3743523 | 0 | -0.16192367 | 0 | 0.004033354  |
| cov1_5_7_8_9_10  | 35.8989 | -224.038 | 0.3744259 | 0 | -0.15854654 | 0 | 0            |
| cov1_4_7_9_10_11 | 35.9026 | -224.04  | 0.3761501 | 0 | -0.13402701 | 0 | 0            |
| cov1_2_4_5_7_10  | 35.9088 | -224.043 | 0.3748647 | 0 | -0.13603678 | 0 | -0.021717701 |

|                  |         |          |           |   |              |   |              |
|------------------|---------|----------|-----------|---|--------------|---|--------------|
| cov1_2_4_5_7_9   | 35.9093 | -224.043 | 0.3747723 | 0 | -0.13596171  | 0 | -0.02188907  |
| cov1_2_6_9_10_11 | 35.9329 | -224.055 | 0.3702699 | 0 | -0.17528714  | 0 | 0.002632326  |
| cov1_2_4_5_8_10  | 35.9351 | -224.056 | 0.3747842 | 0 | -0.13510219  | 0 | -0.022454127 |
| cov1_2_4_5_8_9   | 35.9356 | -224.056 | 0.3746915 | 0 | -0.1350234   | 0 | -0.022625081 |
| cov1_4_8_9_10_11 | 35.9464 | -224.062 | 0.3760094 | 0 | -0.1335768   | 0 | 0            |
| cov1_3_7_8_9_11  | 35.9658 | -224.071 | 0.3663472 | 0 | -0.073975773 | 0 | 0            |
| cov1_4_5_7_9_10  | 35.9716 | -224.074 | 0.3742678 | 0 | -0.15446273  | 0 | 0            |
| cov1_3_7_8_10_11 | 35.9824 | -224.08  | 0.3666359 | 0 | -0.074691965 | 0 | 0            |
| cov1_4_5_8_9_10  | 36.0023 | -224.089 | 0.3741661 | 0 | -0.15415499  | 0 | 0            |
| cov1_2_4_5_9_10  | 36.0148 | -224.096 | 0.3741743 | 0 | -0.12891745  | 0 | -0.027140631 |
| cov1_2_3_5_7_9   | 36.03   | -224.103 | 0.3711309 | 0 | -0.14300459  | 0 | 0.005238537  |
| cov1_2_3_5_8_9   | 36.0309 | -224.104 | 0.3704706 | 0 | -0.13958487  | 0 | 0.005451722  |
| cov1_2_3_5_9_10  | 36.0315 | -224.104 | 0.3707435 | 0 | -0.14090263  | 0 | 0.005400722  |
| cov1_2_3_5_7_10  | 36.0327 | -224.105 | 0.3712511 | 0 | -0.14367505  | 0 | 0.005396745  |
| cov1_2_3_5_8_10  | 36.034  | -224.105 | 0.3705892 | 0 | -0.14029031  | 0 | 0.005602991  |
| cov1_3_5_7_9_10  | 36.0362 | -224.106 | 0.3713569 | 0 | -0.13929856  | 0 | 0            |
| cov1_3_5_8_9_10  | 36.0377 | -224.107 | 0.3707139 | 0 | -0.13575817  | 0 | 0            |
| cov1_2_3_4_8_9   | 36.0744 | -224.126 | 0.3681592 | 0 | -0.059493261 | 0 | -0.035660874 |
| cov1_2_3_4_8_10  | 36.0759 | -224.126 | 0.3683924 | 0 | -0.060360124 | 0 | -0.035383654 |
| cov1_3_4_7_8_10  | 36.0904 | -224.133 | 0.3664085 | 0 | -0.075891478 | 0 | 0            |
| cov1_3_4_7_8_9   | 36.0936 | -224.135 | 0.366115  | 0 | -0.075132653 | 0 | 0            |
| cov1_2_3_4_7_8   | 36.0982 | -224.137 | 0.3682156 | 0 | -0.068026899 | 0 | -0.040974337 |
| cov1_2_3_4_7_9   | 36.1134 | -224.145 | 0.3685838 | 0 | -0.059878889 | 0 | -0.036246062 |
| cov1_2_3_4_7_10  | 36.1141 | -224.145 | 0.3688255 | 0 | -0.060758488 | 0 | -0.035950706 |
| cov1_2_5_7_9_10  | 36.1232 | -224.15  | 0.3744132 | 0 | -0.16130749  | 0 | 0.003829509  |
| cov1_2_3_8_9_11  | 36.1476 | -224.162 | 0.3657412 | 0 | -0.07793323  | 0 | 0.006453336  |
| cov1_3_8_9_10_11 | 36.156  | -224.166 | 0.3660525 | 0 | -0.072865193 | 0 | 0            |
| cov1_2_5_8_9_10  | 36.1612 | -224.169 | 0.3743173 | 0 | -0.1610311   | 0 | 0.003762155  |
| cov1_2_3_8_10_11 | 36.1637 | -224.17  | 0.3660106 | 0 | -0.079018399 | 0 | 0.006933262  |
| cov1_2_6_7_9_10  | 36.1642 | -224.17  | 0.3689315 | 0 | -0.15733176  | 0 | 0.007254985  |
| cov1_2_3_7_9_11  | 36.1919 | -224.184 | 0.3661567 | 0 | -0.078485963 | 0 | 0.006381129  |
| cov1_3_7_9_10_11 | 36.1997 | -224.188 | 0.3664768 | 0 | -0.073480972 | 0 | 0            |
| cov1_2_3_7_10_11 | 36.2074 | -224.192 | 0.366436  | 0 | -0.079587047 | 0 | 0.006876034  |
| cov1_2_3_4_9_10  | 36.2092 | -224.193 | 0.3712395 | 0 | -0.062755089 | 0 | -0.039249208 |
| cov1_2_6_8_9_10  | 36.2152 | -224.196 | 0.3688118 | 0 | -0.15665661  | 0 | 0.00717594   |
| cov1_2_4_7_8_10  | 36.2355 | -224.206 | 0.3741654 | 0 | -0.067517191 | 0 | -0.048543224 |
| cov1_2_4_7_8_9   | 36.2481 | -224.212 | 0.37398   | 0 | -0.066756071 | 0 | -0.049350789 |
| cov1_3_4_8_9_10  | 36.2634 | -224.22  | 0.3659809 | 0 | -0.0745414   | 0 | 0            |
| cov1_3_4_7_9_10  | 36.308  | -224.242 | 0.3663782 | 0 | -0.075177723 | 0 | 0            |
| cov1_2_3_9_10_11 | 36.3143 | -224.245 | 0.3689763 | 0 | -0.082736497 | 0 | 0.006199738  |
| cov2_3_4_5_9_11  | 36.361  | -224.269 | 0.3727506 | 0 | 0            | 0 | -0.085319209 |
| cov1_2_3_7_8_11  | 36.3763 | -224.276 | 0.3649167 | 0 | -0.08839883  | 0 | 0.005263507  |
| cov2_3_4_5_10_11 | 36.3903 | -224.283 | 0.3730635 | 0 | 0            | 0 | -0.085340327 |
| cov2_3_4_5_6_9   | 36.4331 | -224.305 | 0.3697937 | 0 | 0            | 0 | -0.087796829 |
| cov1_2_4_7_9_10  | 36.4547 | -224.316 | 0.3742146 | 0 | -0.066904564 | 0 | -0.048861814 |
| cov2_3_4_5_6_10  | 36.4584 | -224.318 | 0.3702162 | 0 | 0            | 0 | -0.08761989  |
| cov1_2_4_8_9_10  | 36.4665 | -224.322 | 0.3741467 | 0 | -0.066906719 | 0 | -0.049211943 |



|                  |         |          |           |   |              |   |              |
|------------------|---------|----------|-----------|---|--------------|---|--------------|
| cov2_3_4_8_9_11  | 36.5453 | -224.361 | 0.3694547 | 0 | 0            | 0 | -0.079366308 |
| cov2_3_4_7_9_11  | 36.587  | -224.382 | 0.3699025 | 0 | 0            | 0 | -0.080307368 |
| cov2_3_4_8_10_11 | 36.5912 | -224.384 | 0.3697207 | 0 | 0            | 0 | -0.079835939 |
| cov2_3_4_5_8_9   | 36.5949 | -224.386 | 0.3666348 | 0 | 0            | 0 | -0.06099888  |
| cov2_3_4_7_8_9   | 36.6038 | -224.39  | 0.3681418 | 0 | 0            | 0 | -0.068052251 |
| cov2_3_4_5_8_10  | 36.6119 | -224.394 | 0.3669122 | 0 | 0            | 0 | -0.06124123  |
| cov2_3_4_6_8_9   | 36.6145 | -224.396 | 0.3672393 | 0 | 0            | 0 | -0.077880651 |
| cov1_4_7_8_9_10  | 36.6225 | -224.4   | 0.3723437 | 0 | -0.091045091 | 0 | 0            |
| cov2_3_4_7_10_11 | 36.6331 | -224.405 | 0.3701765 | 0 | 0            | 0 | -0.080764596 |
| cov2_3_4_7_8_10  | 36.6335 | -224.405 | 0.3684596 | 0 | 0            | 0 | -0.068742588 |
| cov2_3_4_5_8_11  | 36.6422 | -224.409 | 0.367698  | 0 | 0            | 0 | -0.089328381 |
| cov2_3_4_5_7_9   | 36.6511 | -224.414 | 0.3670672 | 0 | 0            | 0 | -0.061900481 |
| cov2_3_4_6_8_10  | 36.6622 | -224.419 | 0.3676339 | 0 | 0            | 0 | -0.078116106 |
| cov2_3_4_6_7_9   | 36.6671 | -224.422 | 0.3676906 | 0 | 0            | 0 | -0.078509603 |
| cov2_3_4_5_7_10  | 36.6679 | -224.422 | 0.367352  | 0 | 0            | 0 | -0.062134471 |
| cov2_3_4_6_9_11  | 36.6818 | -224.429 | 0.3725177 | 0 | 0            | 0 | -0.090066615 |
| cov2_3_4_9_10_11 | 36.7104 | -224.444 | 0.372882  | 0 | 0            | 0 | -0.086677163 |
| cov2_3_4_6_7_10  | 36.7143 | -224.445 | 0.3680922 | 0 | 0            | 0 | -0.078730697 |
| cov2_3_4_5_7_11  | 36.718  | -224.447 | 0.3681245 | 0 | 0            | 0 | -0.090542443 |
| cov2_3_4_6_10_11 | 36.7338 | -224.455 | 0.3728852 | 0 | 0            | 0 | -0.090049261 |
| cov2_4_5_6_9_11  | 36.7461 | -224.461 | 0.375285  | 0 | 0            | 0 | -0.11208122  |
| cov2_3_4_5_6_8   | 36.7526 | -224.465 | 0.3640257 | 0 | 0            | 0 | -0.089693957 |
| cov2_3_4_8_9_10  | 36.7682 | -224.472 | 0.3678211 | 0 | 0            | 0 | -0.067349258 |
| cov2_4_5_6_10_11 | 36.7684 | -224.473 | 0.3756469 | 0 | 0            | 0 | -0.11147561  |
| cov2_3_4_7_9_10  | 36.8158 | -224.496 | 0.3682456 | 0 | 0            | 0 | -0.068102159 |
| cov1_2_6_7_8_11  | 36.8184 | -224.498 | 0.3739585 | 0 | -0.19862156  | 0 | -0.001145881 |
| cov2_3_4_5_6_7   | 36.8533 | -224.515 | 0.3645729 | 0 | 0            | 0 | -0.090275823 |
| cov2_3_4_6_9_10  | 36.8536 | -224.515 | 0.3712536 | 0 | 0            | 0 | -0.08436755  |
| cov2_3_4_5_9_10  | 36.8848 | -224.531 | 0.3712658 | 0 | 0            | 0 | -0.070288631 |
| cov2_3_4_5_7_8   | 36.8893 | -224.533 | 0.3664744 | 0 | 0            | 0 | -0.075702361 |
| cov2_3_4_7_8_11  | 36.8933 | -224.535 | 0.3690073 | 0 | 0            | 0 | -0.093451081 |
| cov2_3_6_7_8_9   | 36.8989 | -224.538 | 0.362946  | 0 | 0            | 0 | -0.044079522 |
| cov2_4_5_6_9_10  | 36.9125 | -224.545 | 0.3737408 | 0 | 0            | 0 | -0.10308436  |
| cov2_4_5_7_9_11  | 36.9159 | -224.546 | 0.376964  | 0 | 0            | 0 | -0.10075436  |
| cov2_4_5_6_7_9   | 36.9197 | -224.548 | 0.3738075 | 0 | 0            | 0 | -0.10284253  |
| cov2_4_5_6_8_9   | 36.926  | -224.551 | 0.3737194 | 0 | 0            | 0 | -0.10319608  |
| cov2_4_5_6_7_10  | 36.9332 | -224.555 | 0.3741954 | 0 | 0            | 0 | -0.10237179  |
| cov2_4_5_7_10_11 | 36.9337 | -224.555 | 0.3772559 | 0 | 0            | 0 | -0.10038446  |
| cov2_4_5_8_9_11  | 36.9348 | -224.556 | 0.3768507 | 0 | 0            | 0 | -0.10080868  |
| cov2_4_5_6_8_10  | 36.9396 | -224.558 | 0.3741074 | 0 | 0            | 0 | -0.102728    |
| cov2_3_7_8_9_11  | 36.9501 | -224.563 | 0.3652492 | 0 | 0            | 0 | -0.03690211  |
| cov2_4_5_8_10_11 | 36.9524 | -224.565 | 0.3771406 | 0 | 0            | 0 | -0.10043743  |
| cov2_4_7_8_9_11  | 36.9541 | -224.565 | 0.3767841 | 0 | 0            | 0 | -0.10088889  |
| cov1_2_3_7_8_9   | 36.9556 | -224.566 | 0.3620596 | 0 | -0.03883486  | 0 | 0.012161436  |
| cov2_3_6_7_8_10  | 36.9557 | -224.566 | 0.3633793 | 0 | 0            | 0 | -0.043946829 |
| cov1_2_3_7_8_10  | 36.9591 | -224.568 | 0.3623858 | 0 | -0.040070517 | 0 | 0.01265507   |
| cov2_3_6_8_9_11  | 36.9648 | -224.571 | 0.3642223 | 0 | 0            | 0 | -0.048189807 |

|                  |         |          |           |   |              |   |              |
|------------------|---------|----------|-----------|---|--------------|---|--------------|
| cov2_4_5_9_10_11 | 36.9674 | -224.572 | 0.3763892 | 0 | 0            | 0 | -0.10053823  |
| cov1_3_7_8_9_10  | 36.9847 | -224.581 | 0.3625964 | 0 | -0.028675367 | 0 | 0            |
| cov2_4_7_8_10_11 | 36.9894 | -224.583 | 0.3770676 | 0 | 0            | 0 | -0.10081827  |
| cov2_3_5_6_8_9   | 36.9979 | -224.587 | 0.3603439 | 0 | 0            | 0 | -0.034426407 |
| cov2_3_7_8_10_11 | 36.9989 | -224.588 | 0.3655552 | 0 | 0            | 0 | -0.037186567 |
| cov3_4_5_6_8_9   | 37.0119 | -224.594 | 0.3577689 | 0 | 0            | 0 | 0            |
| cov2_3_4_6_7_8   | 37.0188 | -224.598 | 0.3672768 | 0 | 0            | 0 | -0.088798898 |
| cov2_4_6_7_8_9   | 37.0243 | -224.6   | 0.3748566 | 0 | 0            | 0 | -0.099240269 |
| cov2_3_6_7_9_11  | 37.028  | -224.602 | 0.3646442 | 0 | 0            | 0 | -0.048294633 |
| cov2_3_6_8_10_11 | 37.0287 | -224.603 | 0.3645863 | 0 | 0            | 0 | -0.047900401 |
| cov3_4_5_6_8_10  | 37.0478 | -224.612 | 0.3582908 | 0 | 0            | 0 | 0            |
| cov2_4_5_7_8_9   | 37.052  | -224.614 | 0.3745474 | 0 | 0            | 0 | -0.085778423 |
| cov2_3_5_6_8_10  | 37.0525 | -224.615 | 0.3607917 | 0 | 0            | 0 | -0.034156618 |
| cov2_3_4_6_8_11  | 37.0566 | -224.617 | 0.3685941 | 0 | 0            | 0 | -0.092785541 |
| cov2_4_5_7_8_10  | 37.0577 | -224.617 | 0.3748402 | 0 | 0            | 0 | -0.085535699 |
| cov2_4_6_7_8_10  | 37.0581 | -224.617 | 0.3752453 | 0 | 0            | 0 | -0.098943485 |
| cov2_3_5_6_7_9   | 37.0823 | -224.629 | 0.3609196 | 0 | 0            | 0 | -0.035001509 |
| cov2_3_6_8_9_10  | 37.0844 | -224.63  | 0.3626496 | 0 | 0            | 0 | -0.042612836 |
| cov2_3_6_7_10_11 | 37.0917 | -224.634 | 0.3650164 | 0 | 0            | 0 | -0.04799635  |
| cov3_4_5_8_9_11  | 37.0986 | -224.638 | 0.3611103 | 0 | 0            | 0 | 0            |
| cov2_3_5_8_9_11  | 37.1056 | -224.641 | 0.3644776 | 0 | 0            | 0 | -0.03286722  |
| cov1_2_3_8_9_10  | 37.1098 | -224.643 | 0.3619533 | 0 | -0.038773567 | 0 | 0.012301434  |
| cov3_4_5_6_7_9   | 37.1114 | -224.644 | 0.3582724 | 0 | 0            | 0 | 0            |
| cov2_3_8_9_10_11 | 37.1138 | -224.645 | 0.3649104 | 0 | 0            | 0 | -0.036331261 |
| cov2_3_4_6_7_11  | 37.1208 | -224.649 | 0.3690668 | 0 | 0            | 0 | -0.093653457 |
| cov3_5_6_7_8_9   | 37.132  | -224.654 | 0.3580345 | 0 | 0            | 0 | 0            |
| cov3_4_5_8_10_11 | 37.1322 | -224.654 | 0.3614768 | 0 | 0            | 0 | 0            |
| cov2_4_7_8_9_10  | 37.1351 | -224.656 | 0.3750703 | 0 | 0            | 0 | -0.088753353 |
| cov2_3_5_6_7_10  | 37.1362 | -224.656 | 0.3613699 | 0 | 0            | 0 | -0.034721055 |
| cov3_4_5_6_7_10  | 37.1463 | -224.661 | 0.358798  | 0 | 0            | 0 | 0            |
| cov2_4_6_7_9_11  | 37.15   | -224.663 | 0.3765448 | 0 | 0            | 0 | -0.1038014   |
| cov2_3_5_8_10_11 | 37.1532 | -224.665 | 0.3647419 | 0 | 0            | 0 | -0.032774934 |
| cov2_3_6_7_9_10  | 37.1548 | -224.666 | 0.3630374 | 0 | 0            | 0 | -0.042521683 |
| cov3_4_5_7_8_9   | 37.1568 | -224.667 | 0.3611721 | 0 | 0            | 0 | 0            |
| cov2_3_4_5_6_11  | 37.1597 | -224.668 | 0.3737209 | 0 | 0            | 0 | -0.11166243  |
| cov2_3_5_7_9_11  | 37.1649 | -224.671 | 0.3649246 | 0 | 0            | 0 | -0.033699228 |
| cov2_4_7_9_10_11 | 37.1681 | -224.672 | 0.3769161 | 0 | 0            | 0 | -0.10061486  |
| cov2_4_6_8_9_11  | 37.1704 | -224.674 | 0.3764201 | 0 | 0            | 0 | -0.10388638  |
| cov2_3_7_9_10_11 | 37.1709 | -224.674 | 0.3653039 | 0 | 0            | 0 | -0.036662152 |
| cov1_2_3_7_9_10  | 37.1724 | -224.675 | 0.3623083 | 0 | -0.038903535 | 0 | 0.012300216  |
| cov3_4_5_7_9_11  | 37.1766 | -224.677 | 0.3614525 | 0 | 0            | 0 | 0            |
| cov3_4_5_7_8_10  | 37.1782 | -224.677 | 0.361529  | 0 | 0            | 0 | 0            |
| cov3_5_6_7_8_10  | 37.1807 | -224.679 | 0.358551  | 0 | 0            | 0 | 0            |
| cov2_4_8_9_10_11 | 37.1889 | -224.683 | 0.3767976 | 0 | 0            | 0 | -0.1006722   |
| cov2_4_6_7_10_11 | 37.1903 | -224.683 | 0.376883  | 0 | 0            | 0 | -0.10338666  |
| cov3_5_6_8_9_11  | 37.207  | -224.692 | 0.3585796 | 0 | 0            | 0 | 0            |
| cov3_4_5_7_10_11 | 37.2099 | -224.693 | 0.3618267 | 0 | 0            | 0 | 0            |

|                  |         |          |           |   |              |   |              |
|------------------|---------|----------|-----------|---|--------------|---|--------------|
| cov2_4_6_8_10_11 | 37.2105 | -224.694 | 0.3767576 | 0 | 0            | 0 | -0.10347651  |
| cov2_3_5_7_10_11 | 37.2127 | -224.695 | 0.3651948 | 0 | 0            | 0 | -0.033592987 |
| cov2_4_6_9_10_11 | 37.2144 | -224.696 | 0.3758179 | 0 | 0            | 0 | -0.10420848  |
| cov3_5_7_8_9_11  | 37.2336 | -224.705 | 0.3615267 | 0 | 0            | 0 | 0            |
| cov2_4_6_7_9_10  | 37.2552 | -224.716 | 0.3750501 | 0 | 0            | 0 | -0.098004074 |
| cov2_3_5_7_8_9   | 37.2557 | -224.716 | 0.3637665 | 0 | 0            | 0 | -0.025636658 |
| cov2_4_5_7_9_10  | 37.2558 | -224.716 | 0.3747548 | 0 | 0            | 0 | -0.085336819 |
| cov3_5_6_8_10_11 | 37.263  | -224.72  | 0.359071  | 0 | 0            | 0 | 0            |
| cov2_4_5_8_9_10  | 37.2642 | -224.72  | 0.3746771 | 0 | 0            | 0 | -0.085614356 |
| cov2_4_6_8_9_10  | 37.2687 | -224.723 | 0.3749734 | 0 | 0            | 0 | -0.098285987 |
| cov2_3_7_8_9_10  | 37.2771 | -224.727 | 0.3629277 | 0 | 0            | 0 | -0.018454418 |
| cov3_5_7_8_10_11 | 37.2776 | -224.727 | 0.3618696 | 0 | 0            | 0 | 0            |
| cov2_3_5_6_9_11  | 37.281  | -224.729 | 0.3680741 | 0 | 0            | 0 | -0.047814535 |
| cov2_3_5_7_8_10  | 37.2881 | -224.732 | 0.3640427 | 0 | 0            | 0 | -0.025650412 |
| cov3_4_5_8_9_10  | 37.2902 | -224.733 | 0.3610683 | 0 | 0            | 0 | 0            |
| cov3_5_6_8_9_10  | 37.2959 | -224.736 | 0.3579932 | 0 | 0            | 0 | 0            |
| cov3_5_6_7_9_11  | 37.298  | -224.737 | 0.3591034 | 0 | 0            | 0 | 0            |
| cov2_3_6_9_10_11 | 37.3032 | -224.74  | 0.3687627 | 0 | 0            | 0 | -0.051154505 |
| cov2_3_5_6_10_11 | 37.3395 | -224.758 | 0.3684804 | 0 | 0            | 0 | -0.047233778 |
| cov1_7_8_9_10_11 | 37.3397 | -224.758 | 0.3753337 | 0 | -0.077573941 | 0 | 0            |
| cov1_2_7_8_10_11 | 37.3424 | -224.759 | 0.3752583 | 0 | -0.08255186  | 0 | 0.005682257  |
| cov3_5_6_7_10_11 | 37.3531 | -224.765 | 0.3595971 | 0 | 0            | 0 | 0            |
| cov3_4_5_7_9_10  | 37.3659 | -224.771 | 0.3614132 | 0 | 0            | 0 | 0            |
| cov1_2_7_8_9_11  | 37.3683 | -224.772 | 0.3749497 | 0 | -0.081251093 | 0 | 0.004780593  |
| cov3_5_8_9_10_11 | 37.3798 | -224.778 | 0.361337  | 0 | 0            | 0 | 0            |
| cov3_5_6_7_9_10  | 37.3894 | -224.783 | 0.3585156 | 0 | 0            | 0 | 0            |
| cov2_3_5_8_9_10  | 37.4112 | -224.794 | 0.3634568 | 0 | 0            | 0 | -0.02476939  |
| cov2_3_5_9_10_11 | 37.4209 | -224.799 | 0.3693196 | 0 | 0            | 0 | -0.041889323 |
| cov3_5_7_8_9_10  | 37.4303 | -224.803 | 0.3614183 | 0 | 0            | 0 | 0            |
| cov3_5_7_9_10_11 | 37.4524 | -224.815 | 0.3616972 | 0 | 0            | 0 | 0            |
| cov2_3_5_7_9_10  | 37.4718 | -224.824 | 0.3638963 | 0 | 0            | 0 | -0.025550732 |
| cov3_4_7_8_9_11  | 37.497  | -224.837 | 0.3622264 | 0 | 0            | 0 | 0            |
| cov2_3_5_6_9_10  | 37.4985 | -224.838 | 0.3670323 | 0 | 0            | 0 | -0.042772733 |
| cov3_6_7_8_9_11  | 37.4988 | -224.838 | 0.3624295 | 0 | 0            | 0 | 0            |
| cov3_7_8_9_10_11 | 37.5002 | -224.838 | 0.362321  | 0 | 0            | 0 | 0            |
| cov3_6_7_8_9_10  | 37.5117 | -224.844 | 0.3620295 | 0 | 0            | 0 | 0            |
| cov3_4_6_7_8_9   | 37.5118 | -224.844 | 0.3618881 | 0 | 0            | 0 | 0            |
| cov3_4_7_8_9_10  | 37.514  | -224.845 | 0.3621388 | 0 | 0            | 0 | 0            |
| cov3_4_7_8_10_11 | 37.5538 | -224.865 | 0.3625694 | 0 | 0            | 0 | 0            |
| cov3_6_7_8_10_11 | 37.554  | -224.865 | 0.3628404 | 0 | 0            | 0 | 0            |
| cov3_4_6_7_8_10  | 37.5648 | -224.871 | 0.3623684 | 0 | 0            | 0 | 0            |
| cov1_2_7_9_10_11 | 37.5756 | -224.876 | 0.3752166 | 0 | -0.081271754 | 0 | 0.005344465  |
| cov2_3_6_7_8_11  | 37.6191 | -224.898 | 0.3630438 | 0 | 0            | 0 | -0.051823859 |
| cov1_2_8_9_10_11 | 37.6358 | -224.906 | 0.3750605 | 0 | -0.080512008 | 0 | 0.005349043  |
| cov3_4_6_8_9_11  | 37.6437 | -224.91  | 0.3621185 | 0 | 0            | 0 | 0            |
| cov3_6_8_9_10_11 | 37.6443 | -224.91  | 0.3622514 | 0 | 0            | 0 | 0            |
| cov3_4_8_9_10_11 | 37.6444 | -224.911 | 0.3619987 | 0 | 0            | 0 | 0            |

|                  |         |          |           |   |              |   |              |
|------------------|---------|----------|-----------|---|--------------|---|--------------|
| cov2_4_5_7_8_11  | 37.6552 | -224.916 | 0.3783004 | 0 | 0            | 0 | -0.1259322   |
| cov3_4_6_8_9_10  | 37.6594 | -224.918 | 0.3617544 | 0 | 0            | 0 | 0            |
| cov2_3_5_7_8_11  | 37.6603 | -224.918 | 0.3635742 | 0 | 0            | 0 | -0.045729327 |
| cov3_4_5_6_9_11  | 37.6692 | -224.923 | 0.3658655 | 0 | 0            | 0 | 0            |
| cov3_4_5_9_10_11 | 37.6873 | -224.932 | 0.3667837 | 0 | 0            | 0 | 0            |
| cov3_4_5_6_10_11 | 37.6959 | -224.936 | 0.3663415 | 0 | 0            | 0 | 0            |
| cov3_4_6_8_10_11 | 37.6992 | -224.938 | 0.3625514 | 0 | 0            | 0 | 0            |
| cov3_4_6_7_9_11  | 37.7093 | -224.943 | 0.3625235 | 0 | 0            | 0 | 0            |
| cov3_6_7_9_10_11 | 37.7094 | -224.943 | 0.3626368 | 0 | 0            | 0 | 0            |
| cov3_4_7_9_10_11 | 37.711  | -224.944 | 0.3623509 | 0 | 0            | 0 | 0            |
| cov3_4_6_7_9_10  | 37.7269 | -224.952 | 0.3621459 | 0 | 0            | 0 | 0            |
| cov2_3_5_6_7_8   | 37.7521 | -224.964 | 0.3610666 | 0 | 0            | 0 | -0.045032649 |
| cov3_4_6_7_10_11 | 37.7643 | -224.97  | 0.3629631 | 0 | 0            | 0 | 0            |
| cov2_3_5_6_8_11  | 37.7684 | -224.973 | 0.3620566 | 0 | 0            | 0 | -0.048061441 |
| cov3_4_5_6_9_10  | 37.7733 | -224.975 | 0.3654122 | 0 | 0            | 0 | 0            |
| cov2_4_5_6_7_8   | 37.8184 | -224.998 | 0.3762354 | 0 | 0            | 0 | -0.12108497  |
| cov2_4_6_7_8_11  | 37.8298 | -225.003 | 0.3782786 | 0 | 0            | 0 | -0.12222437  |
| cov3_5_6_9_10_11 | 37.856  | -225.016 | 0.3657888 | 0 | 0            | 0 | 0            |
| cov2_3_5_6_7_11  | 37.8634 | -225.02  | 0.3626256 | 0 | 0            | 0 | -0.048702984 |
| cov2_4_5_6_7_11  | 37.8896 | -225.033 | 0.3783085 | 0 | 0            | 0 | -0.12787337  |
| cov2_4_5_6_8_11  | 37.896  | -225.036 | 0.3781777 | 0 | 0            | 0 | -0.12796142  |
| cov3_4_5_7_8_11  | 37.9925 | -225.085 | 0.358615  | 0 | 0            | 0 | 0            |
| cov3_4_5_6_7_8   | 38.0492 | -225.113 | 0.3578876 | 0 | 0            | 0 | 0            |
| cov3_4_6_9_10_11 | 38.0711 | -225.124 | 0.3673214 | 0 | 0            | 0 | 0            |
| cov3_4_5_6_8_11  | 38.1155 | -225.146 | 0.3583043 | 0 | 0            | 0 | 0            |
| cov3_5_6_7_8_11  | 38.2211 | -225.199 | 0.3585108 | 0 | 0            | 0 | 0            |
| cov2_6_7_8_9_11  | 38.2235 | -225.2   | 0.3733373 | 0 | 0            | 0 | -0.053273347 |
| cov3_4_5_6_7_11  | 38.2292 | -225.203 | 0.3587908 | 0 | 0            | 0 | 0            |
| cov2_5_7_8_9_11  | 38.234  | -225.205 | 0.3747312 | 0 | 0            | 0 | -0.054144037 |
| cov2_5_6_7_8_9   | 38.2442 | -225.21  | 0.3727496 | 0 | 0            | 0 | -0.054651395 |
| cov2_6_7_8_10_11 | 38.2553 | -225.216 | 0.3737858 | 0 | 0            | 0 | -0.052664652 |
| cov2_5_7_8_10_11 | 38.2686 | -225.223 | 0.3750572 | 0 | 0            | 0 | -0.053498986 |
| cov2_5_6_7_8_10  | 38.2768 | -225.227 | 0.373179  | 0 | 0            | 0 | -0.05391737  |
| cov2_6_7_8_9_10  | 38.299  | -225.238 | 0.3720091 | 0 | 0            | 0 | -0.047948205 |
| cov1_2_7_8_9_10  | 38.3051 | -225.241 | 0.3710675 | 0 | -0.042222141 | 0 | 0.011214014  |
| cov2_5_7_8_9_10  | 38.3541 | -225.265 | 0.3735112 | 0 | 0            | 0 | -0.047050097 |
| cov2_7_8_9_10_11 | 38.3923 | -225.284 | 0.3743462 | 0 | 0            | 0 | -0.039581406 |
| cov3_4_6_7_8_11  | 38.3983 | -225.287 | 0.3612091 | 0 | 0            | 0 | 0            |
| cov2_5_6_7_9_11  | 38.4115 | -225.294 | 0.3741757 | 0 | 0            | 0 | -0.057456287 |
| cov2_5_7_9_10_11 | 38.4474 | -225.312 | 0.3749067 | 0 | 0            | 0 | -0.05354962  |
| cov2_5_6_8_9_11  | 38.4492 | -225.313 | 0.3740273 | 0 | 0            | 0 | -0.057216419 |
| cov2_5_6_7_10_11 | 38.4508 | -225.314 | 0.3745577 | 0 | 0            | 0 | -0.056588982 |
| cov2_6_7_9_10_11 | 38.4607 | -225.319 | 0.3736391 | 0 | 0            | 0 | -0.051617278 |
| cov2_5_6_7_9_10  | 38.4779 | -225.327 | 0.3730448 | 0 | 0            | 0 | -0.053287839 |
| cov2_5_8_9_10_11 | 38.4852 | -225.331 | 0.3747648 | 0 | 0            | 0 | -0.053317459 |
| cov2_5_6_8_10_11 | 38.4883 | -225.332 | 0.3744091 | 0 | 0            | 0 | -0.056353298 |
| cov2_6_8_9_10_11 | 38.5005 | -225.339 | 0.3734771 | 0 | 0            | 0 | -0.051289379 |

|                    |         |          |           |   |             |   |              |
|--------------------|---------|----------|-----------|---|-------------|---|--------------|
| cov2_5_6_8_9_10    | 38.5094 | -225.343 | 0.3729446 | 0 | 0           | 0 | -0.053210764 |
| cov2_5_6_9_10_11   | 38.598  | -225.387 | 0.3726787 | 0 | 0           | 0 | -0.0551368   |
| cov4_5_7_8_9_10    | 38.6797 | -225.428 | 0.370814  | 0 | 0           | 0 | 0            |
| cov4_5_7_8_10_11   | 38.7015 | -225.439 | 0.3712751 | 0 | 0           | 0 | 0            |
| cov4_5_6_7_8_10    | 38.706  | -225.441 | 0.3708745 | 0 | 0           | 0 | 0            |
| cov4_5_7_8_9_11    | 38.7119 | -225.444 | 0.3708306 | 0 | 0           | 0 | 0            |
| cov4_5_6_7_8_9     | 38.7182 | -225.447 | 0.3704061 | 0 | 0           | 0 | 0            |
| cov4_5_7_9_10_11   | 38.8882 | -225.532 | 0.3711614 | 0 | 0           | 0 | 0            |
| cov4_5_6_7_9_10    | 38.8966 | -225.537 | 0.3708125 | 0 | 0           | 0 | 0            |
| cov4_6_7_8_9_10    | 38.9008 | -225.539 | 0.3717231 | 0 | 0           | 0 | 0            |
| cov4_5_8_9_10_11   | 38.9095 | -225.543 | 0.3710349 | 0 | 0           | 0 | 0            |
| cov4_5_6_8_9_10    | 38.916  | -225.546 | 0.3707148 | 0 | 0           | 0 | 0            |
| cov4_5_6_7_10_11   | 38.9213 | -225.549 | 0.3713906 | 0 | 0           | 0 | 0            |
| cov4_6_7_8_9_11    | 38.926  | -225.551 | 0.3715413 | 0 | 0           | 0 | 0            |
| cov4_5_6_7_9_11    | 38.9314 | -225.554 | 0.3709561 | 0 | 0           | 0 | 0            |
| cov4_6_7_8_10_11   | 38.9389 | -225.558 | 0.3719903 | 0 | 0           | 0 | 0            |
| cov4_5_6_8_10_11   | 38.9423 | -225.559 | 0.3712553 | 0 | 0           | 0 | 0            |
| cov4_7_8_9_10_11   | 38.9489 | -225.563 | 0.3709721 | 0 | 0           | 0 | 0            |
| cov4_5_6_8_9_11    | 38.9526 | -225.565 | 0.370821  | 0 | 0           | 0 | 0            |
| cov4_5_6_9_10_11   | 38.9611 | -225.569 | 0.3702495 | 0 | 0           | 0 | 0            |
| cov5_7_8_9_10_11   | 39.0105 | -225.594 | 0.3714563 | 0 | 0           | 0 | 0            |
| cov5_6_7_8_9_10    | 39.0161 | -225.596 | 0.3710397 | 0 | 0           | 0 | 0            |
| cov6_7_8_9_10_11   | 39.0205 | -225.599 | 0.3715135 | 0 | 0           | 0 | 0            |
| cov5_6_7_8_9_11    | 39.0426 | -225.61  | 0.3711681 | 0 | 0           | 0 | 0            |
| cov5_6_7_8_10_11   | 39.0511 | -225.614 | 0.3716202 | 0 | 0           | 0 | 0            |
| cov4_6_7_9_10_11   | 39.1016 | -225.639 | 0.3719141 | 0 | 0           | 0 | 0            |
| cov4_6_8_9_10_11   | 39.1252 | -225.651 | 0.3717869 | 0 | 0           | 0 | 0            |
| cov5_6_7_9_10_11   | 39.2315 | -225.704 | 0.3715587 | 0 | 0           | 0 | 0            |
| cov5_6_8_9_10_11   | 39.2626 | -225.72  | 0.3714539 | 0 | 0           | 0 | 0            |
| cov2_5_6_7_8_11    | 39.6149 | -225.896 | 0.3766198 | 0 | 0           | 0 | -0.07245788  |
| cov1_5_6_7_8_9_11  | 39.8195 | -222.488 | 0.3758277 | 0 | -0.30481331 | 0 | 0            |
| cov1_5_6_7_8_10_11 | 39.8311 | -222.494 | 0.3759862 | 0 | -0.3052169  | 0 | 0            |
| cov1_3_5_6_7_8_11  | 39.9113 | -222.534 | 0.3734016 | 0 | -0.30373236 | 0 | 0            |
| cov1_4_5_6_7_8_11  | 39.9425 | -222.549 | 0.376404  | 0 | -0.32049273 | 0 | 0            |
| cov1_2_5_6_7_8_11  | 39.988  | -222.572 | 0.3766846 | 0 | -0.31859633 | 0 | -0.006412163 |
| cov1_3_4_5_6_9_11  | 40.1151 | -222.636 | 0.3706293 | 0 | -0.26240493 | 0 | 0            |
| cov1_3_4_5_6_10_11 | 40.1299 | -222.643 | 0.3708217 | 0 | -0.26304718 | 0 | 0            |
| cov1_3_5_6_7_9_11  | 40.1501 | -222.653 | 0.3730771 | 0 | -0.28107272 | 0 | 0            |
| cov1_4_5_6_7_9_11  | 40.1545 | -222.655 | 0.3759078 | 0 | -0.29532034 | 0 | 0            |
| cov1_4_5_6_7_10_11 | 40.1637 | -222.66  | 0.3760645 | 0 | -0.29547698 | 0 | 0            |
| cov1_3_5_6_7_10_11 | 40.1653 | -222.661 | 0.3733024 | 0 | -0.28207633 | 0 | 0            |
| cov1_3_5_6_8_9_11  | 40.1895 | -222.673 | 0.3720982 | 0 | -0.27490904 | 0 | 0            |
| cov1_2_3_4_5_6_11  | 40.201  | -222.679 | 0.3725508 | 0 | -0.2615199  | 0 | -0.027096175 |
| cov1_3_5_6_8_10_11 | 40.2055 | -222.681 | 0.3723239 | 0 | -0.27595276 | 0 | 0            |
| cov1_2_3_5_6_9_11  | 40.2161 | -222.686 | 0.3704476 | 0 | -0.26324106 | 0 | -0.00220125  |
| cov1_3_5_6_9_10_11 | 40.2169 | -222.687 | 0.3703488 | 0 | -0.2648413  | 0 | 0            |
| cov1_2_5_6_7_9_11  | 40.2255 | -222.691 | 0.3762133 | 0 | -0.29625775 | 0 | -0.004753962 |

|                    |         |          |           |   |             |   |              |
|--------------------|---------|----------|-----------|---|-------------|---|--------------|
| cov1_5_6_7_9_10_11 | 40.2305 | -222.693 | 0.37606   | 0 | -0.29937943 | 0 | 0            |
| cov1_2_3_5_6_10_11 | 40.2337 | -222.695 | 0.3706216 | 0 | -0.26432784 | 0 | -0.00193273  |
| cov1_4_5_6_8_9_11  | 40.2357 | -222.696 | 0.3756982 | 0 | -0.29342426 | 0 | 0            |
| cov1_2_5_6_7_10_11 | 40.2379 | -222.697 | 0.376362  | 0 | -0.29693384 | 0 | -0.004418796 |
| cov1_4_5_6_8_10_11 | 40.2447 | -222.701 | 0.3758718 | 0 | -0.29357311 | 0 | 0            |
| cov1_2_4_5_6_7_11  | 40.2451 | -222.701 | 0.3774767 | 0 | -0.29164792 | 0 | -0.028336722 |
| cov1_3_4_5_6_7_11  | 40.2595 | -222.708 | 0.37342   | 0 | -0.29483411 | 0 | 0            |
| cov1_2_3_4_6_9_11  | 40.2784 | -222.717 | 0.3713917 | 0 | -0.19787356 | 0 | -0.043247697 |
| cov1_3_4_5_6_8_11  | 40.2879 | -222.722 | 0.3724489 | 0 | -0.28846299 | 0 | 0            |
| cov1_2_3_4_6_10_11 | 40.2949 | -222.726 | 0.3716467 | 0 | -0.19872118 | 0 | -0.042828341 |
| cov1_2_5_6_8_9_11  | 40.3145 | -222.735 | 0.3760141 | 0 | -0.29452742 | 0 | -0.00471845  |
| cov1_2_3_5_6_7_11  | 40.3163 | -222.736 | 0.3737944 | 0 | -0.29506159 | 0 | -0.004898295 |
| cov1_2_4_5_6_8_11  | 40.3188 | -222.738 | 0.3773102 | 0 | -0.2890297  | 0 | -0.029243518 |
| cov1_5_6_8_9_10_11 | 40.3194 | -222.738 | 0.3758627 | 0 | -0.29762643 | 0 | 0            |
| cov1_2_5_6_8_10_11 | 40.3268 | -222.742 | 0.3761629 | 0 | -0.29520291 | 0 | -0.004384698 |
| cov1_2_3_5_6_8_11  | 40.3532 | -222.755 | 0.3727978 | 0 | -0.28902072 | 0 | -0.004474095 |
| cov1_2_4_5_6_9_11  | 40.4636 | -222.81  | 0.3748251 | 0 | -0.2506266  | 0 | -0.036808534 |
| cov1_2_4_5_6_10_11 | 40.4739 | -222.815 | 0.3749871 | 0 | -0.25113479 | 0 | -0.036507712 |
| cov1_3_4_6_8_9_11  | 40.5214 | -222.839 | 0.3672241 | 0 | -0.21111883 | 0 | 0            |
| cov1_3_4_6_8_10_11 | 40.5352 | -222.846 | 0.3675858 | 0 | -0.211975   | 0 | 0            |
| cov1_3_4_6_7_9_11  | 40.5494 | -222.853 | 0.367838  | 0 | -0.21265918 | 0 | 0            |
| cov1_3_4_6_7_10_11 | 40.5618 | -222.859 | 0.3682121 | 0 | -0.2135371  | 0 | 0            |
| cov1_3_4_6_9_10_11 | 40.5626 | -222.86  | 0.3690681 | 0 | -0.21595096 | 0 | 0            |
| cov1_4_5_6_7_8_9   | 40.575  | -222.866 | 0.3718587 | 0 | -0.26268612 | 0 | 0            |
| cov1_4_5_6_7_8_10  | 40.5768 | -222.867 | 0.3720376 | 0 | -0.26261482 | 0 | 0            |
| cov1_3_5_6_7_8_9   | 40.5842 | -222.87  | 0.3689176 | 0 | -0.24815612 | 0 | 0            |
| cov1_3_5_6_7_8_10  | 40.5937 | -222.875 | 0.3691696 | 0 | -0.24899475 | 0 | 0            |
| cov1_2_4_6_7_9_11  | 40.5984 | -222.877 | 0.3761829 | 0 | -0.20392666 | 0 | -0.05530237  |
| cov1_2_4_6_7_10_11 | 40.602  | -222.879 | 0.3764218 | 0 | -0.20481161 | 0 | -0.054448687 |
| cov1_4_5_6_9_10_11 | 40.649  | -222.903 | 0.3734631 | 0 | -0.2791838  | 0 | 0            |
| cov1_2_4_6_8_9_11  | 40.6523 | -222.904 | 0.3760272 | 0 | -0.20277557 | 0 | -0.055671662 |
| cov1_2_4_6_8_10_11 | 40.656  | -222.906 | 0.3762652 | 0 | -0.20365349 | 0 | -0.054826933 |
| cov1_2_3_4_6_8_11  | 40.6563 | -222.906 | 0.3699829 | 0 | -0.19981695 | 0 | -0.048618509 |
| cov1_5_6_7_8_9_10  | 40.6662 | -222.911 | 0.3719927 | 0 | -0.26651729 | 0 | 0            |
| cov1_2_5_6_7_8_9   | 40.6684 | -222.912 | 0.3719268 | 0 | -0.26721639 | 0 | 0.000519482  |
| cov1_3_4_6_7_8_11  | 40.6734 | -222.915 | 0.3669068 | 0 | -0.22607325 | 0 | 0            |
| cov1_2_5_6_7_8_10  | 40.6736 | -222.915 | 0.3720913 | 0 | -0.26767837 | 0 | 0.000915951  |
| cov1_4_6_7_8_10_11 | 40.6783 | -222.917 | 0.3739531 | 0 | -0.23478232 | 0 | 0            |
| cov1_4_6_7_8_9_11  | 40.693  | -222.925 | 0.3736484 | 0 | -0.23436682 | 0 | 0            |
| cov1_2_3_4_6_7_11  | 40.6944 | -222.925 | 0.3706464 | 0 | -0.20102433 | 0 | -0.04973775  |
| cov1_3_4_5_6_7_8   | 40.71   | -222.933 | 0.3692944 | 0 | -0.26267272 | 0 | 0            |
| cov1_2_4_5_6_7_8   | 40.7469 | -222.952 | 0.3731196 | 0 | -0.26485351 | 0 | -0.021355715 |
| cov4_5_6_7_8_11    | 40.7483 | -226.462 | 0.3735684 | 0 | 0           | 0 | 0            |
| cov1_2_3_5_6_7_8   | 40.7867 | -222.972 | 0.3693813 | 0 | -0.26627196 | 0 | 0.000358432  |
| cov1_2_4_6_7_8_11  | 40.8077 | -222.982 | 0.3773729 | 0 | -0.21692437 | 0 | -0.067603999 |
| cov1_3_6_7_8_9_11  | 40.8195 | -222.988 | 0.3642565 | 0 | -0.18288886 | 0 | 0            |
| cov1_2_5_6_9_10_11 | 40.8314 | -222.994 | 0.3734444 | 0 | -0.28112408 | 0 | -0.004291817 |

|                    |         |          |           |   |             |   |              |
|--------------------|---------|----------|-----------|---|-------------|---|--------------|
| cov1_2_4_6_9_10_11 | 40.833  | -222.995 | 0.3748792 | 0 | -0.19745935 | 0 | -0.057587459 |
| cov1_2_3_4_5_6_9   | 40.8346 | -222.995 | 0.369352  | 0 | -0.22021938 | 0 | -0.019815595 |
| cov1_2_3_4_5_6_10  | 40.8427 | -223     | 0.3695473 | 0 | -0.22076894 | 0 | -0.019594378 |
| cov1_3_6_7_8_10_11 | 40.8461 | -223.001 | 0.3646461 | 0 | -0.18355308 | 0 | 0            |
| cov1_3_4_5_6_8_9   | 40.8852 | -223.021 | 0.3680603 | 0 | -0.23274831 | 0 | 0            |
| cov1_3_4_5_6_9_10  | 40.8856 | -223.021 | 0.368587  | 0 | -0.23519507 | 0 | 0            |
| cov1_3_4_5_6_7_9   | 40.886  | -223.021 | 0.3689234 | 0 | -0.23779536 | 0 | 0            |
| cov1_3_4_5_6_7_10  | 40.8925 | -223.024 | 0.3691869 | 0 | -0.23843129 | 0 | 0            |
| cov1_3_4_5_6_8_10  | 40.8927 | -223.025 | 0.3683222 | 0 | -0.23341366 | 0 | 0            |
| cov1_3_4_6_7_8_9   | 40.9074 | -223.032 | 0.3641788 | 0 | -0.1851068  | 0 | 0            |
| cov1_3_4_6_7_8_10  | 40.9094 | -223.033 | 0.3645977 | 0 | -0.18616778 | 0 | 0            |
| cov1_2_4_5_6_7_9   | 40.9152 | -223.036 | 0.3726415 | 0 | -0.23876829 | 0 | -0.021549632 |
| cov1_2_4_5_6_7_10  | 40.9188 | -223.038 | 0.3728183 | 0 | -0.23904064 | 0 | -0.021241245 |
| cov1_2_4_5_6_8_9   | 40.958  | -223.057 | 0.3725439 | 0 | -0.23706192 | 0 | -0.022519944 |
| cov1_2_4_5_6_8_10  | 40.9616 | -223.059 | 0.3727201 | 0 | -0.23733882 | 0 | -0.022212378 |
| cov1_4_5_6_7_9_10  | 40.9738 | -223.065 | 0.3721551 | 0 | -0.25693513 | 0 | 0            |
| cov1_2_3_5_6_7_9   | 40.9875 | -223.072 | 0.3690222 | 0 | -0.24397218 | 0 | 0.001980805  |
| cov1_3_5_6_7_9_10  | 40.9875 | -223.072 | 0.3691519 | 0 | -0.24258744 | 0 | 0            |
| cov1_2_3_5_6_9_10  | 40.9942 | -223.075 | 0.3681963 | 0 | -0.23924825 | 0 | 0.002351954  |
| cov1_2_3_5_6_8_9   | 40.9948 | -223.076 | 0.3681395 | 0 | -0.23917758 | 0 | 0.002268569  |
| cov1_3_5_6_8_9_10  | 40.9955 | -223.076 | 0.3682707 | 0 | -0.23760903 | 0 | 0            |
| cov1_2_3_5_6_7_10  | 40.9968 | -223.077 | 0.3692637 | 0 | -0.24502453 | 0 | 0.002316779  |
| cov1_2_3_5_6_8_10  | 41.0052 | -223.081 | 0.3683793 | 0 | -0.24025477 | 0 | 0.002595335  |
| cov1_4_5_6_8_9_10  | 41.0223 | -223.089 | 0.3720295 | 0 | -0.25602758 | 0 | 0            |
| cov1_2_4_6_7_8_10  | 41.0391 | -223.098 | 0.3721225 | 0 | -0.17849281 | 0 | -0.047134489 |
| cov1_2_4_6_7_8_9   | 41.049  | -223.103 | 0.3718536 | 0 | -0.17736571 | 0 | -0.048120299 |
| cov1_2_3_4_5_6_8   | 41.0531 | -223.105 | 0.3693249 | 0 | -0.23564236 | 0 | -0.020279139 |
| cov1_2_3_4_5_6_7   | 41.0597 | -223.108 | 0.3701642 | 0 | -0.24110794 | 0 | -0.019851749 |
| cov1_2_3_4_6_8_9   | 41.0663 | -223.111 | 0.3661053 | 0 | -0.16435468 | 0 | -0.034749288 |
| cov1_2_5_6_7_9_10  | 41.073  | -223.115 | 0.3722104 | 0 | -0.26181972 | 0 | 0.000697535  |
| cov1_2_3_4_6_8_10  | 41.0748 | -223.116 | 0.3664536 | 0 | -0.16549553 | 0 | -0.034375636 |
| cov1_2_4_5_6_9_10  | 41.0752 | -223.116 | 0.371947  | 0 | -0.22851257 | 0 | -0.027997657 |
| cov1_4_6_7_9_10_11 | 41.0764 | -223.116 | 0.3740161 | 0 | -0.22893017 | 0 | 0            |
| cov1_2_3_4_6_7_9   | 41.1103 | -223.133 | 0.3666949 | 0 | -0.16485228 | 0 | -0.035548959 |
| cov1_2_3_4_6_7_10  | 41.1172 | -223.137 | 0.3670541 | 0 | -0.16603077 | 0 | -0.035150287 |
| cov1_2_5_6_8_9_10  | 41.1294 | -223.143 | 0.372088  | 0 | -0.26097689 | 0 | 0.000627742  |
| cov1_4_6_8_9_10_11 | 41.1374 | -223.147 | 0.3738395 | 0 | -0.22788471 | 0 | 0            |
| cov1_2_3_4_6_9_10  | 41.1641 | -223.16  | 0.3688133 | 0 | -0.16822997 | 0 | -0.037743609 |
| cov1_2_3_6_8_9_11  | 41.178  | -223.167 | 0.3637159 | 0 | -0.1789399  | 0 | 0.003489792  |
| cov1_3_6_8_9_10_11 | 41.178  | -223.167 | 0.3639434 | 0 | -0.17640927 | 0 | 0            |
| cov1_2_3_4_6_7_8   | 41.1842 | -223.17  | 0.3661704 | 0 | -0.17390469 | 0 | -0.042665019 |
| cov1_2_3_6_8_10_11 | 41.2049 | -223.181 | 0.3640754 | 0 | -0.1800726  | 0 | 0.00414221   |
| cov1_3_6_7_9_10_11 | 41.2278 | -223.192 | 0.3645252 | 0 | -0.17718969 | 0 | 0            |
| cov1_2_3_6_7_9_11  | 41.2287 | -223.193 | 0.3642834 | 0 | -0.17963193 | 0 | 0.00339999   |
| cov1_3_4_6_8_9_10  | 41.2437 | -223.2   | 0.3640203 | 0 | -0.17932646 | 0 | 0            |
| cov1_2_3_6_7_10_11 | 41.2544 | -223.205 | 0.3646553 | 0 | -0.18080124 | 0 | 0.004071941  |
| cov1_3_4_6_7_9_10  | 41.2948 | -223.226 | 0.3645751 | 0 | -0.18013224 | 0 | 0            |

|                    |         |          |           |   |             |   |              |
|--------------------|---------|----------|-----------|---|-------------|---|--------------|
| cov1_2_3_6_9_10_11 | 41.306  | -223.231 | 0.3666044 | 0 | -0.18425817 | 0 | 0.003329589  |
| cov1_4_6_7_8_9_10  | 41.3997 | -223.278 | 0.370299  | 0 | -0.20162287 | 0 | 0            |
| cov1_2_4_6_7_9_10  | 41.4283 | -223.292 | 0.3722195 | 0 | -0.17247898 | 0 | -0.047679939 |
| cov1_2_4_6_8_9_10  | 41.4526 | -223.305 | 0.372134  | 0 | -0.17210181 | 0 | -0.048152847 |
| cov1_2_3_6_7_8_11  | 41.565  | -223.361 | 0.3626378 | 0 | -0.18813341 | 0 | 0.002053916  |
| cov1_2_3_6_7_8_9   | 41.5811 | -223.369 | 0.3603614 | 0 | -0.15559528 | 0 | 0.008153482  |
| cov1_3_6_7_8_9_10  | 41.5884 | -223.372 | 0.3607806 | 0 | -0.1493534  | 0 | 0            |
| cov1_2_3_6_7_8_10  | 41.5935 | -223.375 | 0.3607915 | 0 | -0.15704803 | 0 | 0.00882252   |
| cov1_2_4_5_7_8_11  | 41.6398 | -223.398 | 0.3793302 | 0 | -0.19320905 | 0 | -0.028920976 |
| cov1_3_4_5_7_8_11  | 41.6606 | -223.409 | 0.3753029 | 0 | -0.19697883 | 0 | 0            |
| cov1_4_5_7_8_9_11  | 41.7015 | -223.429 | 0.3781412 | 0 | -0.20443841 | 0 | 0            |
| cov1_4_5_7_8_10_11 | 41.7046 | -223.431 | 0.3782232 | 0 | -0.20471195 | 0 | 0            |
| cov1_3_5_7_8_9_11  | 41.7377 | -223.447 | 0.3754787 | 0 | -0.19001832 | 0 | 0            |
| cov1_3_5_7_8_10_11 | 41.7434 | -223.45  | 0.3755816 | 0 | -0.19098846 | 0 | 0            |
| cov1_2_3_5_7_8_11  | 41.7711 | -223.464 | 0.3757432 | 0 | -0.19870295 | 0 | -0.001659666 |
| cov1_2_3_4_5_9_11  | 41.7825 | -223.469 | 0.3743856 | 0 | -0.15248329 | 0 | -0.027820854 |
| cov1_2_3_4_5_10_11 | 41.7893 | -223.473 | 0.3744859 | 0 | -0.15342653 | 0 | -0.02771412  |
| cov1_2_3_4_5_7_11  | 41.8031 | -223.48  | 0.376412  | 0 | -0.17590531 | 0 | -0.027343097 |
| cov1_2_5_7_8_9_11  | 41.818  | -223.487 | 0.3785533 | 0 | -0.20676631 | 0 | -0.002350163 |
| cov1_5_7_8_9_10_11 | 41.8192 | -223.488 | 0.3784516 | 0 | -0.20853661 | 0 | 0            |
| cov1_2_3_4_5_8_11  | 41.8218 | -223.489 | 0.3756714 | 0 | -0.17096183 | 0 | -0.027603949 |
| cov1_2_5_7_8_10_11 | 41.8224 | -223.489 | 0.3786256 | 0 | -0.20743619 | 0 | -0.002228522 |
| cov1_2_4_5_7_9_11  | 41.8279 | -223.492 | 0.3790834 | 0 | -0.18013273 | 0 | -0.029057543 |
| cov1_2_4_5_7_10_11 | 41.8323 | -223.494 | 0.37917   | 0 | -0.18068559 | 0 | -0.028906867 |
| cov1_3_4_5_7_9_11  | 41.8517 | -223.504 | 0.3750908 | 0 | -0.1845829  | 0 | 0            |
| cov1_3_4_5_7_10_11 | 41.8569 | -223.507 | 0.3752129 | 0 | -0.18534051 | 0 | 0            |
| cov1_3_4_5_8_9_11  | 41.8731 | -223.515 | 0.3743334 | 0 | -0.17993601 | 0 | 0            |
| cov1_3_4_5_8_10_11 | 41.8786 | -223.518 | 0.3744547 | 0 | -0.18073039 | 0 | 0            |
| cov1_2_4_5_8_9_11  | 41.8827 | -223.52  | 0.378943  | 0 | -0.1784914  | 0 | -0.029771456 |
| cov1_3_4_5_9_10_11 | 41.8857 | -223.521 | 0.3731429 | 0 | -0.1729902  | 0 | 0            |
| cov1_2_4_5_8_10_11 | 41.8872 | -223.522 | 0.3790284 | 0 | -0.17903786 | 0 | -0.029621648 |
| cov1_2_3_6_8_9_10  | 41.9057 | -223.531 | 0.3602207 | 0 | -0.15043536 | 0 | 0.008463867  |
| cov1_4_5_7_9_10_11 | 41.9409 | -223.549 | 0.378229  | 0 | -0.20384903 | 0 | 0            |
| cov1_3_5_7_9_10_11 | 41.9759 | -223.566 | 0.3754742 | 0 | -0.1894817  | 0 | 0            |
| cov1_2_3_5_7_9_11  | 41.9765 | -223.566 | 0.375571  | 0 | -0.18871729 | 0 | -0.00096639  |
| cov1_2_3_6_7_9_10  | 41.9795 | -223.568 | 0.360723  | 0 | -0.15047472 | 0 | 0.008478954  |
| cov1_2_3_5_7_10_11 | 41.9826 | -223.57  | 0.375675  | 0 | -0.18976753 | 0 | -0.000878419 |
| cov1_4_5_8_9_10_11 | 42.0014 | -223.579 | 0.3780642 | 0 | -0.20276745 | 0 | 0            |
| cov1_3_5_8_9_10_11 | 42.0051 | -223.581 | 0.3747074 | 0 | -0.18490877 | 0 | 0            |
| cov1_2_3_5_8_9_11  | 42.006  | -223.581 | 0.3747944 | 0 | -0.18432167 | 0 | -0.000650115 |
| cov1_2_3_5_8_10_11 | 42.0124 | -223.584 | 0.3748974 | 0 | -0.185408   | 0 | -0.000568433 |
| cov1_2_3_4_7_8_11  | 42.0131 | -223.585 | 0.3726935 | 0 | -0.1107233  | 0 | -0.048567392 |
| cov1_6_7_8_9_10_11 | 42.0289 | -223.593 | 0.3725854 | 0 | -0.1904696  | 0 | 0            |
| cov1_2_3_5_9_10_11 | 42.0331 | -223.595 | 0.3729708 | 0 | -0.17466003 | 0 | -7.27E-05    |
| cov1_2_6_7_8_10_11 | 42.0476 | -223.602 | 0.3726826 | 0 | -0.19297503 | 0 | 0.002767082  |
| cov1_2_3_4_8_9_11  | 42.0495 | -223.603 | 0.372464  | 0 | -0.1014093  | 0 | -0.043310353 |
| cov1_2_3_4_8_10_11 | 42.0588 | -223.608 | 0.3726586 | 0 | -0.10222935 | 0 | -0.043137329 |



|                    |         |          |           |   |              |   |              |
|--------------------|---------|----------|-----------|---|--------------|---|--------------|
| cov1_2_5_7_9_10_11 | 42.0588 | -223.608 | 0.3786275 | 0 | -0.20632209  | 0 | -0.002485094 |
| cov1_2_3_4_7_9_11  | 42.0655 | -223.611 | 0.3729756 | 0 | -0.10234088  | 0 | -0.044028207 |
| cov1_2_6_7_8_9_11  | 42.0672 | -223.612 | 0.372309  | 0 | -0.19150748  | 0 | 0.001699916  |
| cov1_2_3_4_7_10_11 | 42.0744 | -223.615 | 0.3731782 | 0 | -0.10316868  | 0 | -0.043835936 |
| cov1_2_3_4_9_10_11 | 42.0752 | -223.616 | 0.3738971 | 0 | -0.10405537  | 0 | -0.04511069  |
| cov1_3_4_7_8_9_11  | 42.1261 | -223.641 | 0.3698062 | 0 | -0.11886621  | 0 | 0            |
| cov1_2_5_8_9_10_11 | 42.1267 | -223.642 | 0.3784675 | 0 | -0.20535865  | 0 | -0.00246966  |
| cov1_3_4_7_8_10_11 | 42.1313 | -223.644 | 0.3700625 | 0 | -0.11959525  | 0 | 0            |
| cov1_2_4_7_8_10_11 | 42.1715 | -223.664 | 0.3785002 | 0 | -0.11034499  | 0 | -0.056319968 |
| cov1_2_4_7_8_9_11  | 42.1726 | -223.665 | 0.3783343 | 0 | -0.10966827  | 0 | -0.056966487 |
| cov1_2_4_5_9_10_11 | 42.1949 | -223.676 | 0.3772692 | 0 | -0.16097456  | 0 | -0.037397776 |
| cov1_3_4_8_9_10_11 | 42.3324 | -223.744 | 0.3694973 | 0 | -0.11728805  | 0 | 0            |
| cov1_3_4_7_9_10_11 | 42.3573 | -223.757 | 0.3699658 | 0 | -0.118461    | 0 | 0            |
| cov1_2_4_7_9_10_11 | 42.3999 | -223.778 | 0.3784891 | 0 | -0.10929535  | 0 | -0.056668649 |
| cov1_2_4_8_9_10_11 | 42.4384 | -223.797 | 0.3783647 | 0 | -0.10873047  | 0 | -0.056958184 |
| cov1_2_6_7_9_10_11 | 42.4555 | -223.806 | 0.3727141 | 0 | -0.18639788  | 0 | 0.002416125  |
| cov1_2_6_8_9_10_11 | 42.5368 | -223.847 | 0.3725162 | 0 | -0.18489935  | 0 | 0.002438072  |
| cov1_3_4_5_7_8_9   | 42.6724 | -223.914 | 0.3708926 | 0 | -0.13524685  | 0 | 0            |
| cov1_3_4_5_7_8_10  | 42.6735 | -223.915 | 0.3710266 | 0 | -0.13559684  | 0 | 0            |
| cov1_2_3_4_5_7_8   | 42.6814 | -223.919 | 0.3718406 | 0 | -0.13232971  | 0 | -0.019730539 |
| cov1_4_7_8_9_10_11 | 42.6856 | -223.921 | 0.3760748 | 0 | -0.13445781  | 0 | 0            |
| cov1_2_4_5_7_8_10  | 42.7047 | -223.931 | 0.3747514 | 0 | -0.13648999  | 0 | -0.021389903 |
| cov1_2_4_5_7_8_9   | 42.7052 | -223.931 | 0.3746615 | 0 | -0.13642942  | 0 | -0.021554979 |
| cov1_2_6_7_8_9_10  | 42.7609 | -223.959 | 0.3687114 | 0 | -0.16308249  | 0 | 0.007228816  |
| cov1_4_5_7_8_9_10  | 42.7656 | -223.961 | 0.3741641 | 0 | -0.15465051  | 0 | 0            |
| cov1_2_3_5_7_8_9   | 42.8243 | -223.99  | 0.371057  | 0 | -0.14344887  | 0 | 0.005340561  |
| cov1_2_3_5_7_8_10  | 42.8268 | -223.992 | 0.3711716 | 0 | -0.14409104  | 0 | 0.005491625  |
| cov1_3_5_7_8_9_10  | 42.8307 | -223.994 | 0.3712998 | 0 | -0.13969075  | 0 | 0            |
| cov1_2_3_4_5_8_9   | 42.835  | -223.996 | 0.3710163 | 0 | -0.11490771  | 0 | -0.020279563 |
| cov1_2_3_4_5_8_10  | 42.8373 | -223.997 | 0.3711515 | 0 | -0.11549539  | 0 | -0.020147367 |
| cov1_2_3_4_5_7_9   | 42.843  | -224     | 0.3716445 | 0 | -0.11872782  | 0 | -0.019963426 |
| cov1_2_3_4_5_9_10  | 42.8432 | -224     | 0.3719286 | 0 | -0.12020568  | 0 | -0.019786484 |
| cov1_2_3_4_5_7_10  | 42.845  | -224.001 | 0.3717812 | 0 | -0.11928073  | 0 | -0.019828761 |
| cov1_3_4_5_8_9_10  | 42.8896 | -224.023 | 0.3703583 | 0 | -0.13114479  | 0 | 0            |
| cov1_3_4_5_7_9_10  | 42.8957 | -224.026 | 0.3710094 | 0 | -0.13472686  | 0 | 0            |
| cov1_2_3_4_7_8_9   | 42.9147 | -224.036 | 0.3684957 | 0 | -0.0601639   | 0 | -0.036034405 |
| cov1_2_3_4_7_8_10  | 42.9152 | -224.036 | 0.3687323 | 0 | -0.061021949 | 0 | -0.035742874 |
| cov1_2_5_7_8_9_10  | 42.9155 | -224.036 | 0.3743031 | 0 | -0.16156362  | 0 | 0.003944571  |
| cov1_2_4_5_7_9_10  | 42.9277 | -224.042 | 0.3748347 | 0 | -0.13572584  | 0 | -0.021792112 |
| cov1_2_4_5_8_9_10  | 42.954  | -224.055 | 0.3747344 | 0 | -0.13476106  | 0 | -0.02252802  |
| cov2_3_4_5_6_8_9   | 42.9564 | -224.056 | 0.3634307 | 0 | 0            | 0 | -0.078946715 |
| cov1_2_3_7_8_9_11  | 42.9765 | -224.066 | 0.3661073 | 0 | -0.079076957 | 0 | 0.006457231  |
| cov1_3_7_8_9_10_11 | 42.9846 | -224.071 | 0.3664288 | 0 | -0.074010854 | 0 | 0            |
| cov1_2_3_7_8_10_11 | 42.9915 | -224.074 | 0.3663815 | 0 | -0.08016081  | 0 | 0.006944023  |
| cov2_3_4_5_6_8_10  | 42.9922 | -224.074 | 0.3638839 | 0 | 0            | 0 | -0.07899611  |
| cov2_3_4_5_6_7_9   | 43.0421 | -224.099 | 0.364     | 0 | 0            | 0 | -0.079524845 |
| cov1_2_3_5_7_9_10  | 43.05   | -224.103 | 0.3711501 | 0 | -0.14299005  | 0 | 0.005279062  |

|                    |         |          |           |   |              |   |              |
|--------------------|---------|----------|-----------|---|--------------|---|--------------|
| cov1_2_3_5_8_9_10  | 43.051  | -224.104 | 0.3704835 | 0 | -0.13957463  | 0 | 0.005479065  |
| cov2_3_4_5_6_7_10  | 43.077  | -224.117 | 0.364457  | 0 | 0            | 0 | -0.079566865 |
| cov1_2_3_4_8_9_10  | 43.0916 | -224.124 | 0.3682722 | 0 | -0.059746575 | 0 | -0.035441865 |
| cov2_3_4_5_6_9_11  | 43.0946 | -224.126 | 0.3714178 | 0 | 0            | 0 | -0.096909713 |
| cov1_3_4_7_8_9_10  | 43.1071 | -224.132 | 0.3663008 | 0 | -0.075373689 | 0 | 0            |
| cov2_3_4_5_8_9_11  | 43.1206 | -224.139 | 0.3684106 | 0 | 0            | 0 | -0.075792188 |
| cov1_2_3_4_7_9_10  | 43.13   | -224.143 | 0.3687074 | 0 | -0.060156451 | 0 | -0.03600725  |
| cov2_3_4_5_6_10_11 | 43.1343 | -224.145 | 0.3718254 | 0 | 0            | 0 | -0.096649625 |
| cov2_3_4_5_8_10_11 | 43.1513 | -224.154 | 0.3686878 | 0 | 0            | 0 | -0.075978305 |
| cov1_2_3_8_9_10_11 | 43.1663 | -224.161 | 0.3658188 | 0 | -0.078066746 | 0 | 0.006578704  |
| cov2_3_4_5_7_9_11  | 43.1742 | -224.165 | 0.3688605 | 0 | 0            | 0 | -0.076758663 |
| cov2_3_4_5_7_10_11 | 43.2049 | -224.181 | 0.3691447 | 0 | 0            | 0 | -0.076934162 |
| cov1_2_3_7_9_10_11 | 43.2102 | -224.183 | 0.3662449 | 0 | -0.078638573 | 0 | 0.006523287  |
| cov1_2_4_7_8_9_10  | 43.2541 | -224.205 | 0.374109  | 0 | -0.067168903 | 0 | -0.048613094 |
| cov2_3_4_5_9_10_11 | 43.3784 | -224.267 | 0.37281   | 0 | 0            | 0 | -0.085067508 |
| cov2_3_4_7_8_9_11  | 43.3921 | -224.274 | 0.3698255 | 0 | 0            | 0 | -0.080325709 |
| cov2_3_4_7_8_10_11 | 43.4376 | -224.297 | 0.3700952 | 0 | 0            | 0 | -0.080783513 |
| cov2_3_4_5_6_9_10  | 43.4432 | -224.3   | 0.3699067 | 0 | 0            | 0 | -0.087471418 |
| cov2_3_4_6_7_8_9   | 43.4486 | -224.302 | 0.3675496 | 0 | 0            | 0 | -0.079367495 |
| cov2_3_4_5_7_8_9   | 43.4579 | -224.307 | 0.3669759 | 0 | 0            | 0 | -0.061816896 |
| cov2_3_4_5_7_8_10  | 43.4743 | -224.315 | 0.3672566 | 0 | 0            | 0 | -0.06204851  |
| cov2_3_4_6_7_8_10  | 43.4967 | -224.327 | 0.3679508 | 0 | 0            | 0 | -0.079594307 |
| cov2_3_4_5_7_8_11  | 43.5062 | -224.331 | 0.3680528 | 0 | 0            | 0 | -0.090384372 |
| cov2_3_4_5_6_8_11  | 43.5089 | -224.333 | 0.365871  | 0 | 0            | 0 | -0.098281596 |
| cov2_3_4_6_8_9_11  | 43.5184 | -224.337 | 0.3687693 | 0 | 0            | 0 | -0.083266156 |
| cov2_3_4_6_7_9_11  | 43.5641 | -224.36  | 0.3692625 | 0 | 0            | 0 | -0.08406247  |
| cov2_3_4_8_9_10_11 | 43.5646 | -224.361 | 0.3694014 | 0 | 0            | 0 | -0.079456687 |
| cov2_3_4_6_8_10_11 | 43.5722 | -224.364 | 0.3691169 | 0 | 0            | 0 | -0.083420206 |
| cov2_3_4_5_6_7_8   | 43.5992 | -224.378 | 0.3642968 | 0 | 0            | 0 | -0.091314411 |
| cov2_3_4_5_6_7_11  | 43.6032 | -224.38  | 0.3664397 | 0 | 0            | 0 | -0.09898344  |
| cov2_3_4_7_9_10_11 | 43.6066 | -224.382 | 0.369857  | 0 | 0            | 0 | -0.080383878 |
| cov2_3_4_5_8_9_10  | 43.6135 | -224.385 | 0.3667112 | 0 | 0            | 0 | -0.060882781 |
| cov2_3_4_6_7_10_11 | 43.6178 | -224.387 | 0.3696159 | 0 | 0            | 0 | -0.084199868 |
| cov2_3_4_7_8_9_10  | 43.6239 | -224.39  | 0.3681543 | 0 | 0            | 0 | -0.068043689 |
| cov2_3_4_6_8_9_10  | 43.6345 | -224.395 | 0.3672121 | 0 | 0            | 0 | -0.077913845 |
| cov2_3_4_5_7_9_10  | 43.6694 | -224.413 | 0.3671676 | 0 | 0            | 0 | -0.061776219 |
| cov2_4_5_6_7_8_9   | 43.6721 | -224.414 | 0.3736354 | 0 | 0            | 0 | -0.10403483  |
| cov2_4_5_6_7_8_10  | 43.6858 | -224.421 | 0.3740255 | 0 | 0            | 0 | -0.10356004  |
| cov2_3_4_6_7_9_10  | 43.6873 | -224.422 | 0.3676733 | 0 | 0            | 0 | -0.078530012 |
| cov2_3_4_6_9_10_11 | 43.702  | -224.429 | 0.3725233 | 0 | 0            | 0 | -0.090052834 |
| cov2_4_5_7_8_9_11  | 43.7164 | -224.436 | 0.3768821 | 0 | 0            | 0 | -0.10074741  |
| cov2_4_5_6_7_9_11  | 43.7279 | -224.442 | 0.3758518 | 0 | 0            | 0 | -0.11137709  |
| cov2_4_5_7_8_10_11 | 43.7339 | -224.445 | 0.3771703 | 0 | 0            | 0 | -0.1003781   |
| cov2_4_5_6_8_9_11  | 43.7439 | -224.45  | 0.3757269 | 0 | 0            | 0 | -0.11151673  |
| cov2_4_5_6_7_10_11 | 43.7511 | -224.454 | 0.3762186 | 0 | 0            | 0 | -0.11077378  |
| cov2_4_5_6_9_10_11 | 43.7538 | -224.455 | 0.3753751 | 0 | 0            | 0 | -0.11154292  |
| cov2_4_5_6_8_10_11 | 43.7668 | -224.462 | 0.3760889 | 0 | 0            | 0 | -0.11093461  |

|                    |         |          |           |   |              |   |              |
|--------------------|---------|----------|-----------|---|--------------|---|--------------|
| cov2_3_6_7_8_9_11  | 43.8007 | -224.479 | 0.3645264 | 0 | 0            | 0 | -0.049617884 |
| cov2_3_5_6_7_8_9   | 43.8283 | -224.492 | 0.3606035 | 0 | 0            | 0 | -0.035700519 |
| cov2_3_5_6_8_9_11  | 43.8525 | -224.504 | 0.3616554 | 0 | 0            | 0 | -0.038963797 |
| cov2_3_6_7_8_10_11 | 43.865  | -224.511 | 0.3648963 | 0 | 0            | 0 | -0.049319788 |
| cov3_4_5_6_7_8_9   | 43.8713 | -224.514 | 0.3579208 | 0 | 0            | 0 | 0            |
| cov2_3_5_6_7_8_10  | 43.883  | -224.52  | 0.3610572 | 0 | 0            | 0 | -0.035416864 |
| cov3_4_5_6_7_8_10  | 43.9068 | -224.532 | 0.3584501 | 0 | 0            | 0 | 0            |
| cov2_3_4_6_7_8_11  | 43.912  | -224.534 | 0.368877  | 0 | 0            | 0 | -0.094323597 |
| cov2_3_5_6_8_10_11 | 43.9168 | -224.537 | 0.3620721 | 0 | 0            | 0 | -0.038602433 |
| cov2_3_6_7_8_9_10  | 43.919  | -224.538 | 0.3629673 | 0 | 0            | 0 | -0.044069467 |
| cov2_4_5_6_7_9_10  | 43.9236 | -224.54  | 0.3739298 | 0 | 0            | 0 | -0.10231181  |
| cov2_4_5_7_9_10_11 | 43.9274 | -224.542 | 0.3770526 | 0 | 0            | 0 | -0.10021908  |
| cov2_4_5_6_8_9_10  | 43.9302 | -224.543 | 0.3738353 | 0 | 0            | 0 | -0.10266471  |
| cov2_3_5_6_7_9_11  | 43.9316 | -224.544 | 0.362251  | 0 | 0            | 0 | -0.039612411 |
| cov3_4_5_6_8_9_11  | 43.9401 | -224.548 | 0.3584492 | 0 | 0            | 0 | 0            |
| cov2_4_6_7_8_9_11  | 43.9427 | -224.55  | 0.3763774 | 0 | 0            | 0 | -0.10450707  |
| cov2_4_5_8_9_10_11 | 43.9465 | -224.551 | 0.3769443 | 0 | 0            | 0 | -0.10027314  |
| cov2_3_5_7_8_9_11  | 43.9635 | -224.56  | 0.3648466 | 0 | 0            | 0 | -0.033756744 |
| cov1_2_3_7_8_9_10  | 43.9694 | -224.563 | 0.3622318 | 0 | -0.039234589 | 0 | 0.012406566  |
| cov2_3_7_8_9_10_11 | 43.9703 | -224.563 | 0.3652469 | 0 | 0            | 0 | -0.03690362  |
| cov2_4_7_8_9_10_11 | 43.9719 | -224.564 | 0.3768298 | 0 | 0            | 0 | -0.10061353  |
| cov3_4_5_7_8_9_11  | 43.9778 | -224.567 | 0.3613685 | 0 | 0            | 0 | 0            |
| cov3_4_5_6_8_10_11 | 43.9831 | -224.57  | 0.3589524 | 0 | 0            | 0 | 0            |
| cov2_4_6_7_8_10_11 | 43.9838 | -224.57  | 0.3767163 | 0 | 0            | 0 | -0.10409724  |
| cov2_3_6_8_9_10_11 | 43.9848 | -224.571 | 0.3641963 | 0 | 0            | 0 | -0.048214616 |
| cov2_3_5_6_7_10_11 | 43.9954 | -224.576 | 0.3626673 | 0 | 0            | 0 | -0.039244479 |
| cov2_3_5_7_8_10_11 | 44.0106 | -224.584 | 0.3651131 | 0 | 0            | 0 | -0.033654192 |
| cov3_4_5_7_8_10_11 | 44.0107 | -224.584 | 0.3617398 | 0 | 0            | 0 | 0            |
| cov2_3_5_6_8_9_10  | 44.0171 | -224.587 | 0.3603954 | 0 | 0            | 0 | -0.034316188 |
| cov3_4_5_6_8_9_10  | 44.024  | -224.59  | 0.3579327 | 0 | 0            | 0 | 0            |
| cov3_4_5_6_7_9_11  | 44.0367 | -224.597 | 0.3589608 | 0 | 0            | 0 | 0            |
| cov2_4_6_7_8_9_10  | 44.0405 | -224.598 | 0.3749322 | 0 | 0            | 0 | -0.098924845 |
| cov2_3_6_7_9_10_11 | 44.0481 | -224.602 | 0.3646285 | 0 | 0            | 0 | -0.048309352 |
| cov2_4_5_7_8_9_10  | 44.0614 | -224.609 | 0.3746538 | 0 | 0            | 0 | -0.085228663 |
| cov3_5_6_7_8_9_11  | 44.0617 | -224.609 | 0.3587297 | 0 | 0            | 0 | 0            |
| cov3_4_5_6_7_10_11 | 44.0787 | -224.618 | 0.3594664 | 0 | 0            | 0 | 0            |
| cov2_3_5_6_7_9_10  | 44.1013 | -224.629 | 0.3609766 | 0 | 0            | 0 | -0.034879995 |
| cov3_4_5_8_9_10_11 | 44.1145 | -224.635 | 0.3612391 | 0 | 0            | 0 | 0            |
| cov3_5_6_7_8_10_11 | 44.1174 | -224.637 | 0.3592264 | 0 | 0            | 0 | 0            |
| cov3_4_5_6_7_9_10  | 44.1228 | -224.64  | 0.3584439 | 0 | 0            | 0 | 0            |
| cov2_3_5_8_9_10_11 | 44.1258 | -224.641 | 0.3644817 | 0 | 0            | 0 | -0.032857465 |
| cov3_5_6_7_8_9_10  | 44.1478 | -224.652 | 0.3581578 | 0 | 0            | 0 | 0            |
| cov2_4_6_7_9_10_11 | 44.1678 | -224.662 | 0.3765914 | 0 | 0            | 0 | -0.10351936  |
| cov3_4_5_7_8_9_10  | 44.1711 | -224.664 | 0.361326  | 0 | 0            | 0 | 0            |
| cov2_3_5_7_9_10_11 | 44.185  | -224.671 | 0.3649343 | 0 | 0            | 0 | -0.033674719 |
| cov2_4_6_8_9_10_11 | 44.1883 | -224.672 | 0.3764662 | 0 | 0            | 0 | -0.1036085   |
| cov3_4_5_7_9_10_11 | 44.192  | -224.674 | 0.3615902 | 0 | 0            | 0 | 0            |

|                      |         |          |           |   |              |   |              |
|----------------------|---------|----------|-----------|---|--------------|---|--------------|
| cov3_5_6_8_9_10_11   | 44.2243 | -224.69  | 0.3586773 | 0 | 0            | 0 | 0            |
| cov3_5_7_8_9_10_11   | 44.2521 | -224.704 | 0.3616112 | 0 | 0            | 0 | 0            |
| cov2_3_5_7_8_9_10    | 44.2754 | -224.716 | 0.3638078 | 0 | 0            | 0 | -0.025547223 |
| cov2_3_5_6_9_10_11   | 44.2982 | -224.727 | 0.3681253 | 0 | 0            | 0 | -0.047554826 |
| cov3_5_6_7_9_10_11   | 44.315  | -224.736 | 0.3592059 | 0 | 0            | 0 | 0            |
| cov1_2_7_8_9_10_11   | 44.3532 | -224.755 | 0.3751413 | 0 | -0.081862898 | 0 | 0.005421741  |
| cov3_4_7_8_9_10_11   | 44.5169 | -224.837 | 0.3622667 | 0 | 0            | 0 | 0            |
| cov3_4_6_7_8_9_11    | 44.5171 | -224.837 | 0.3622846 | 0 | 0            | 0 | 0            |
| cov3_6_7_8_9_10_11   | 44.5187 | -224.838 | 0.3624701 | 0 | 0            | 0 | 0            |
| cov3_4_6_7_8_9_10    | 44.5314 | -224.844 | 0.3619441 | 0 | 0            | 0 | 0            |
| cov3_4_6_7_8_10_11   | 44.5729 | -224.865 | 0.3627245 | 0 | 0            | 0 | 0            |
| cov2_3_5_6_7_8_11    | 44.6285 | -224.892 | 0.362301  | 0 | 0            | 0 | -0.049362111 |
| cov3_4_6_8_9_10_11   | 44.6636 | -224.91  | 0.3621517 | 0 | 0            | 0 | 0            |
| cov2_4_5_6_7_8_11    | 44.6658 | -224.911 | 0.3781357 | 0 | 0            | 0 | -0.12900785  |
| cov3_4_5_6_9_10_11   | 44.67   | -224.913 | 0.3660225 | 0 | 0            | 0 | 0            |
| cov3_4_6_7_9_10_11   | 44.7291 | -224.943 | 0.3625662 | 0 | 0            | 0 | 0            |
| cov3_4_5_6_7_8_11    | 45.012  | -225.084 | 0.3584354 | 0 | 0            | 0 | 0            |
| cov2_5_6_7_8_9_11    | 45.1889 | -225.173 | 0.3739569 | 0 | 0            | 0 | -0.058187888 |
| cov2_6_7_8_9_10_11   | 45.2252 | -225.191 | 0.3734866 | 0 | 0            | 0 | -0.052961964 |
| cov2_5_6_7_8_10_11   | 45.2285 | -225.192 | 0.3743404 | 0 | 0            | 0 | -0.057312775 |
| cov2_5_7_8_9_10_11   | 45.2449 | -225.201 | 0.3748204 | 0 | 0            | 0 | -0.053599534 |
| cov2_5_6_7_8_9_10    | 45.2508 | -225.204 | 0.3728565 | 0 | 0            | 0 | -0.054122035 |
| cov2_5_6_7_9_10_11   | 45.4203 | -225.288 | 0.3742604 | 0 | 0            | 0 | -0.056927409 |
| cov2_5_6_8_9_10_11   | 45.4581 | -225.307 | 0.3741118 | 0 | 0            | 0 | -0.056690215 |
| cov4_5_7_8_9_10_11   | 45.6891 | -225.423 | 0.3710727 | 0 | 0            | 0 | 0            |
| cov4_5_6_7_8_9_10    | 45.6939 | -225.425 | 0.3706098 | 0 | 0            | 0 | 0            |
| cov4_5_6_7_8_10_11   | 45.7206 | -225.439 | 0.3711536 | 0 | 0            | 0 | 0            |
| cov4_5_6_7_8_9_11    | 45.7312 | -225.444 | 0.3707177 | 0 | 0            | 0 | 0            |
| cov4_5_6_7_9_10_11   | 45.9084 | -225.532 | 0.3711464 | 0 | 0            | 0 | 0            |
| cov4_6_7_8_9_10_11   | 45.921  | -225.539 | 0.37172   | 0 | 0            | 0 | 0            |
| cov4_5_6_8_9_10_11   | 45.9297 | -225.543 | 0.3710111 | 0 | 0            | 0 | 0            |
| cov5_6_7_8_9_10_11   | 46.0298 | -225.593 | 0.3713431 | 0 | 0            | 0 | 0            |
| cov1_3_5_6_7_8_9_11  | 46.7618 | -222.449 | 0.3729111 | 0 | -0.2866907   | 0 | 0            |
| cov1_4_5_6_7_8_9_11  | 46.7671 | -222.452 | 0.3756929 | 0 | -0.3007171   | 0 | 0            |
| cov1_4_5_6_7_8_10_11 | 46.7763 | -222.456 | 0.3758525 | 0 | -0.3008782   | 0 | 0            |
| cov1_3_5_6_7_8_10_11 | 46.7768 | -222.457 | 0.3731357 | 0 | -0.28769271  | 0 | 0            |
| cov1_2_5_6_7_8_9_11  | 46.8345 | -222.485 | 0.3759934 | 0 | -0.30157292  | 0 | -0.004762868 |
| cov1_5_6_7_8_9_10_11 | 46.8395 | -222.488 | 0.3758406 | 0 | -0.30470202  | 0 | 0            |
| cov1_2_5_6_7_8_10_11 | 46.8468 | -222.492 | 0.3761404 | 0 | -0.30224825  | 0 | -0.004430169 |
| cov1_2_4_5_6_7_8_11  | 46.8583 | -222.497 | 0.377246  | 0 | -0.29728076  | 0 | -0.027879133 |
| cov1_3_4_5_6_7_8_11  | 46.8724 | -222.504 | 0.3732564 | 0 | -0.30042903  | 0 | 0            |
| cov1_2_3_5_6_7_8_11  | 46.926  | -222.531 | 0.3736223 | 0 | -0.30057444  | 0 | -0.004922924 |
| cov1_2_3_4_5_6_9_11  | 47.0387 | -222.587 | 0.3718275 | 0 | -0.24259816  | 0 | -0.026857987 |
| cov1_2_3_4_5_6_10_11 | 47.0551 | -222.596 | 0.3720132 | 0 | -0.2434957   | 0 | -0.026637712 |
| cov1_2_4_5_6_7_9_11  | 47.0698 | -222.603 | 0.3767492 | 0 | -0.27221933  | 0 | -0.027947527 |
| cov1_2_4_5_6_7_10_11 | 47.0812 | -222.609 | 0.3769062 | 0 | -0.27274324  | 0 | -0.027652619 |
| cov1_3_4_5_6_7_9_11  | 47.0897 | -222.613 | 0.372852  | 0 | -0.27627784  | 0 | 0            |

|                      |         |          |           |   |             |   |              |
|----------------------|---------|----------|-----------|---|-------------|---|--------------|
| cov1_3_4_5_6_7_10_11 | 47.1028 | -222.62  | 0.3730856 | 0 | -0.27708129 | 0 | 0            |
| cov1_3_4_5_6_8_9_11  | 47.1207 | -222.628 | 0.3718777 | 0 | -0.27001165 | 0 | 0            |
| cov1_3_4_5_6_8_10_11 | 47.1346 | -222.635 | 0.3721108 | 0 | -0.27084711 | 0 | 0            |
| cov1_3_4_5_6_9_10_11 | 47.1353 | -222.636 | 0.370632  | 0 | -0.26238666 | 0 | 0            |
| cov1_2_4_5_6_8_9_11  | 47.144  | -222.64  | 0.376578  | 0 | -0.26962704 | 0 | -0.028852617 |
| cov1_2_4_5_6_8_10_11 | 47.1554 | -222.646 | 0.3767354 | 0 | -0.27014734 | 0 | -0.028557818 |
| cov1_2_3_5_6_7_9_11  | 47.1677 | -222.652 | 0.3732326 | 0 | -0.27905373 | 0 | -0.003334037 |
| cov1_3_4_6_7_8_9_11  | 47.1683 | -222.652 | 0.3676809 | 0 | -0.21812746 | 0 | 0            |
| cov1_3_5_6_7_9_10_11 | 47.1702 | -222.653 | 0.3730703 | 0 | -0.28108971 | 0 | 0            |
| cov1_4_5_6_7_9_10_11 | 47.1738 | -222.655 | 0.3759274 | 0 | -0.29505076 | 0 | 0            |
| cov1_3_4_6_7_8_10_11 | 47.1806 | -222.658 | 0.3680526 | 0 | -0.21900337 | 0 | 0            |
| cov1_2_3_5_6_7_10_11 | 47.1833 | -222.66  | 0.3734458 | 0 | -0.28025226 | 0 | -0.003056803 |
| cov1_2_3_4_5_6_7_11  | 47.1863 | -222.661 | 0.3744588 | 0 | -0.27441491 | 0 | -0.026440061 |
| cov1_2_3_5_6_8_9_11  | 47.2077 | -222.672 | 0.3722338 | 0 | -0.27313142 | 0 | -0.002923018 |
| cov1_3_5_6_8_9_10_11 | 47.2096 | -222.673 | 0.3720834 | 0 | -0.27494724 | 0 | 0            |
| cov1_2_3_4_5_6_8_11  | 47.2123 | -222.674 | 0.3735084 | 0 | -0.26783691 | 0 | -0.026777728 |
| cov1_2_4_6_7_8_9_11  | 47.2174 | -222.677 | 0.375976  | 0 | -0.20947846 | 0 | -0.054922423 |
| cov1_2_4_6_7_8_10_11 | 47.221  | -222.679 | 0.3762129 | 0 | -0.21036103 | 0 | -0.054071241 |
| cov1_2_3_5_6_8_10_11 | 47.2241 | -222.68  | 0.3724463 | 0 | -0.27435943 | 0 | -0.002654225 |
| cov1_2_3_5_6_9_10_11 | 47.2359 | -222.686 | 0.3704288 | 0 | -0.2633354  | 0 | -0.002277384 |
| cov1_2_5_6_7_9_10_11 | 47.2456 | -222.691 | 0.3762212 | 0 | -0.29620492 | 0 | -0.004715864 |
| cov1_4_5_6_8_9_10_11 | 47.255  | -222.696 | 0.3757287 | 0 | -0.29314573 | 0 | 0            |
| cov1_2_3_4_6_8_9_11  | 47.2787 | -222.707 | 0.3701716 | 0 | -0.19543819 | 0 | -0.041558942 |
| cov1_2_3_4_6_7_9_11  | 47.2948 | -222.716 | 0.3708539 | 0 | -0.19672589 | 0 | -0.042503719 |
| cov1_2_3_4_6_9_10_11 | 47.2965 | -222.716 | 0.3714434 | 0 | -0.19799    | 0 | -0.04300482  |
| cov1_2_3_4_6_8_10_11 | 47.2969 | -222.717 | 0.3704713 | 0 | -0.19637598 | 0 | -0.041268246 |
| cov1_2_3_4_6_7_10_11 | 47.312  | -222.724 | 0.3711634 | 0 | -0.19768982 | 0 | -0.042187137 |
| cov1_2_3_4_6_7_8_11  | 47.3148 | -222.726 | 0.3704676 | 0 | -0.20658835 | 0 | -0.049413156 |
| cov1_2_5_6_8_9_10_11 | 47.3346 | -222.735 | 0.3760214 | 0 | -0.29447279 | 0 | -0.004680971 |
| cov1_2_4_5_6_9_10_11 | 47.4833 | -222.81  | 0.3748447 | 0 | -0.25047619 | 0 | -0.036749882 |
| cov1_3_4_5_6_7_8_9   | 47.5062 | -222.821 | 0.3687513 | 0 | -0.24336236 | 0 | 0            |
| cov1_3_4_5_6_7_8_10  | 47.5126 | -222.824 | 0.3690123 | 0 | -0.24399435 | 0 | 0            |
| cov1_2_4_5_6_7_8_9   | 47.5351 | -222.836 | 0.3724056 | 0 | -0.24441959 | 0 | -0.021085051 |
| cov1_3_4_6_8_9_10_11 | 47.5379 | -222.837 | 0.3673556 | 0 | -0.21126625 | 0 | 0            |
| cov1_2_4_5_6_7_8_10  | 47.5386 | -222.837 | 0.3725798 | 0 | -0.24469399 | 0 | -0.02077772  |
| cov1_3_4_6_7_9_10_11 | 47.5649 | -222.851 | 0.3679843 | 0 | -0.212833   | 0 | 0            |
| cov1_4_5_6_7_8_9_10  | 47.591  | -222.864 | 0.3719275 | 0 | -0.26220435 | 0 | 0            |
| cov1_2_3_5_6_7_8_9   | 47.6035 | -222.87  | 0.3688401 | 0 | -0.24945198 | 0 | 0.001959033  |
| cov1_3_5_6_7_8_9_10  | 47.6036 | -222.87  | 0.3689688 | 0 | -0.24808178 | 0 | 0            |
| cov1_2_4_6_7_9_10_11 | 47.609  | -222.873 | 0.3762711 | 0 | -0.20420487 | 0 | -0.05466823  |
| cov1_2_3_5_6_7_8_10  | 47.6127 | -222.874 | 0.3690794 | 0 | -0.25049643 | 0 | 0.00229337   |
| cov1_2_4_6_8_9_10_11 | 47.6631 | -222.9   | 0.3761145 | 0 | -0.20304607 | 0 | -0.05504902  |
| cov1_2_3_4_5_6_7_8   | 47.6794 | -222.908 | 0.3699699 | 0 | -0.24691399 | 0 | -0.019415435 |
| cov1_2_5_6_7_8_9_10  | 47.6863 | -222.911 | 0.3719688 | 0 | -0.26703866 | 0 | 0.000699956  |
| cov1_4_6_7_8_9_10_11 | 47.6889 | -222.913 | 0.3738212 | 0 | -0.23435135 | 0 | 0            |
| cov1_2_3_4_6_7_8_9   | 47.7368 | -222.937 | 0.3665012 | 0 | -0.17031486 | 0 | -0.035231695 |
| cov1_2_3_4_6_7_8_10  | 47.7436 | -222.94  | 0.3668586 | 0 | -0.17149163 | 0 | -0.034832793 |

|                      |         |          |           |   |             |   |              |
|----------------------|---------|----------|-----------|---|-------------|---|--------------|
| cov1_3_6_7_8_9_10_11 | 47.8361 | -222.986 | 0.3643821 | 0 | -0.18301117 | 0 | 0            |
| cov1_2_3_6_7_8_9_11  | 47.8371 | -222.987 | 0.3641444 | 0 | -0.18541524 | 0 | 0.003352684  |
| cov1_2_3_4_5_6_8_9   | 47.8509 | -222.994 | 0.3687656 | 0 | -0.21652446 | 0 | -0.020113102 |
| cov1_2_3_4_5_6_9_10  | 47.8532 | -222.995 | 0.3693983 | 0 | -0.22001706 | 0 | -0.019749139 |
| cov1_2_3_4_5_6_7_9   | 47.854  | -222.995 | 0.3696076 | 0 | -0.22187371 | 0 | -0.019682609 |
| cov1_2_3_4_5_6_8_10  | 47.8598 | -222.998 | 0.3690212 | 0 | -0.21744652 | 0 | -0.019866956 |
| cov1_2_3_4_5_6_7_10  | 47.8618 | -222.999 | 0.3698645 | 0 | -0.22276873 | 0 | -0.019432396 |
| cov1_2_3_6_7_8_10_11 | 47.8626 | -222.999 | 0.3645135 | 0 | -0.18658221 | 0 | 0.004022053  |
| cov1_3_4_5_6_8_9_10  | 47.9037 | -223.02  | 0.3681321 | 0 | -0.2326029  | 0 | 0            |
| cov1_3_4_5_6_7_9_10  | 47.904  | -223.02  | 0.3690051 | 0 | -0.23765443 | 0 | 0            |
| cov1_3_4_6_7_8_9_10  | 47.9179 | -223.027 | 0.3644004 | 0 | -0.18548154 | 0 | 0            |
| cov1_2_4_5_6_7_9_10  | 47.932  | -223.034 | 0.3727041 | 0 | -0.23845023 | 0 | -0.021412866 |
| cov1_2_4_5_6_8_9_10  | 47.9748 | -223.056 | 0.3726016 | 0 | -0.23677477 | 0 | -0.022346931 |
| cov1_2_3_5_6_7_9_10  | 48.0067 | -223.071 | 0.369072  | 0 | -0.24396372 | 0 | 0.00208639   |
| cov1_2_3_5_6_8_9_10  | 48.0144 | -223.075 | 0.3681793 | 0 | -0.23916619 | 0 | 0.002358911  |
| cov1_2_4_6_7_8_9_10  | 48.0511 | -223.094 | 0.3719954 | 0 | -0.17793561 | 0 | -0.047287868 |
| cov1_2_3_4_6_8_9_10  | 48.0817 | -223.109 | 0.3662463 | 0 | -0.16472767 | 0 | -0.034473362 |
| cov1_2_3_4_6_7_9_10  | 48.1246 | -223.13  | 0.3668506 | 0 | -0.16527228 | 0 | -0.035245833 |
| cov1_2_3_6_8_9_10_11 | 48.1951 | -223.166 | 0.3638264 | 0 | -0.17918169 | 0 | 0.0036692    |
| cov1_2_3_6_7_9_10_11 | 48.245  | -223.191 | 0.3644082 | 0 | -0.17991193 | 0 | 0.003601862  |
| cov1_2_3_4_5_7_8_11  | 48.5832 | -223.36  | 0.376354  | 0 | -0.17625766 | 0 | -0.027052449 |
| cov1_2_3_6_7_8_9_10  | 48.5921 | -223.364 | 0.3605668 | 0 | -0.15615574 | 0 | 0.00844229   |
| cov1_2_4_5_7_8_9_11  | 48.6109 | -223.374 | 0.3789983 | 0 | -0.18086855 | 0 | -0.028756114 |
| cov1_2_4_5_7_8_10_11 | 48.6151 | -223.376 | 0.3790794 | 0 | -0.18141534 | 0 | -0.028613409 |
| cov1_3_4_5_7_8_9_11  | 48.6345 | -223.385 | 0.3750508 | 0 | -0.18530125 | 0 | 0            |
| cov1_3_4_5_7_8_10_11 | 48.6394 | -223.388 | 0.3751671 | 0 | -0.18604597 | 0 | 0            |
| cov1_4_5_7_8_9_10_11 | 48.7216 | -223.429 | 0.3781492 | 0 | -0.20435333 | 0 | 0            |
| cov1_3_5_7_8_9_10_11 | 48.757  | -223.447 | 0.3754288 | 0 | -0.19017644 | 0 | 0            |
| cov1_2_3_5_7_8_9_11  | 48.7577 | -223.447 | 0.3755238 | 0 | -0.18944941 | 0 | -0.000899114 |
| cov1_2_3_5_7_8_10_11 | 48.7634 | -223.45  | 0.3756224 | 0 | -0.19047795 | 0 | -0.000819487 |
| cov1_2_3_4_5_7_9_11  | 48.7731 | -223.455 | 0.3761489 | 0 | -0.1638466  | 0 | -0.027214347 |
| cov1_2_3_4_5_7_10_11 | 48.7792 | -223.458 | 0.376268  | 0 | -0.16481101 | 0 | -0.027096038 |
| cov1_2_3_4_5_8_9_11  | 48.7926 | -223.464 | 0.3754088 | 0 | -0.15903639 | 0 | -0.027478168 |
| cov1_2_3_4_5_8_10_11 | 48.799  | -223.468 | 0.3755271 | 0 | -0.16003649 | 0 | -0.027362137 |
| cov1_2_3_4_5_9_10_11 | 48.8021 | -223.469 | 0.3743589 | 0 | -0.15266051 | 0 | -0.027871136 |
| cov1_2_5_7_8_9_10_11 | 48.838  | -223.487 | 0.3785417 | 0 | -0.20685624 | 0 | -0.002404678 |
| cov1_2_4_5_7_9_10_11 | 48.8481 | -223.492 | 0.3790831 | 0 | -0.18013536 | 0 | -0.029058655 |
| cov1_2_3_4_7_8_9_11  | 48.8543 | -223.495 | 0.3729135 | 0 | -0.102883   | 0 | -0.043858382 |
| cov1_2_3_4_7_8_10_11 | 48.8628 | -223.5   | 0.3731107 | 0 | -0.10369138 | 0 | -0.043669027 |
| cov1_3_4_5_7_9_10_11 | 48.8718 | -223.504 | 0.3750767 | 0 | -0.18463688 | 0 | 0            |
| cov1_3_4_5_8_9_10_11 | 48.8931 | -223.515 | 0.3743143 | 0 | -0.1800095  | 0 | 0            |
| cov1_2_4_5_8_9_10_11 | 48.9029 | -223.52  | 0.3789431 | 0 | -0.17849131 | 0 | -0.029771496 |
| cov1_2_3_5_7_9_10_11 | 48.9958 | -223.566 | 0.3755266 | 0 | -0.18880571 | 0 | -0.001075947 |
| cov1_2_3_5_8_9_10_11 | 49.0251 | -223.581 | 0.3747449 | 0 | -0.18442237 | 0 | -0.000772787 |
| cov1_2_6_7_8_9_10_11 | 49.0478 | -223.592 | 0.372511  | 0 | -0.19226412 | 0 | 0.002376488  |
| cov1_2_3_4_8_9_10_11 | 49.0695 | -223.603 | 0.3724945 | 0 | -0.10145756 | 0 | -0.043242649 |
| cov1_2_3_4_7_9_10_11 | 49.0853 | -223.611 | 0.373016  | 0 | -0.10240531 | 0 | -0.043938946 |

|                      |         |          |           |   |              |   |              |
|----------------------|---------|----------|-----------|---|--------------|---|--------------|
| cov1_3_4_7_8_9_10_11 | 49.1439 | -223.64  | 0.3699117 | 0 | -0.11893911  | 0 | 0            |
| cov1_2_4_7_8_9_10_11 | 49.1866 | -223.661 | 0.378409  | 0 | -0.10983211  | 0 | -0.056443007 |
| cov1_2_3_4_5_7_8_9   | 49.6407 | -223.888 | 0.3715698 | 0 | -0.11937289  | 0 | -0.01965031  |
| cov1_2_3_4_5_7_8_10  | 49.6425 | -223.889 | 0.3717003 | 0 | -0.11990041  | 0 | -0.019520968 |
| cov1_3_4_5_7_8_9_10  | 49.6918 | -223.914 | 0.370942  | 0 | -0.135124    | 0 | 0            |
| cov2_3_4_5_6_8_9_11  | 49.6918 | -223.914 | 0.3653371 | 0 | 0            | 0 | -0.087730319 |
| cov1_2_4_5_7_8_9_10  | 49.7237 | -223.93  | 0.3747056 | 0 | -0.13616265  | 0 | -0.021462941 |
| cov2_3_4_5_6_8_10_11 | 49.7385 | -223.937 | 0.3657637 | 0 | 0            | 0 | -0.087679406 |
| cov2_3_4_5_6_7_9_11  | 49.7704 | -223.953 | 0.3659272 | 0 | 0            | 0 | -0.088431351 |
| cov2_3_4_5_6_7_8_9   | 49.7752 | -223.956 | 0.363714  | 0 | 0            | 0 | -0.080504783 |
| cov2_3_4_5_6_7_8_10  | 49.8108 | -223.974 | 0.364174  | 0 | 0            | 0 | -0.08054651  |
| cov2_3_4_5_6_7_10_11 | 49.8165 | -223.976 | 0.3663572 | 0 | 0            | 0 | -0.088370723 |
| cov1_2_3_5_7_8_9_10  | 49.8443 | -223.99  | 0.3710751 | 0 | -0.14343508  | 0 | 0.005378907  |
| cov1_2_3_4_5_8_9_10  | 49.8548 | -223.995 | 0.3710509 | 0 | -0.11485081  | 0 | -0.020239075 |
| cov1_2_3_4_5_7_9_10  | 49.8626 | -223.999 | 0.3716928 | 0 | -0.11869189  | 0 | -0.01989843  |
| cov1_2_3_4_7_8_9_10  | 49.9313 | -224.034 | 0.3686182 | 0 | -0.060439217 | 0 | -0.035797749 |
| cov2_3_4_5_6_8_9_10  | 49.9735 | -224.055 | 0.3635274 | 0 | 0            | 0 | -0.078808472 |
| cov2_3_4_5_7_8_9_11  | 49.9751 | -224.056 | 0.3687816 | 0 | 0            | 0 | -0.07676094  |
| cov1_2_3_7_8_9_10_11 | 49.9948 | -224.066 | 0.3661937 | 0 | -0.079226749 | 0 | 0.006596817  |
| cov2_3_4_5_7_8_10_11 | 50.0054 | -224.071 | 0.3690619 | 0 | 0            | 0 | -0.076936824 |
| cov2_3_4_5_6_7_9_10  | 50.0587 | -224.097 | 0.3641033 | 0 | 0            | 0 | -0.079379639 |
| cov2_3_4_5_6_9_10_11 | 50.1091 | -224.123 | 0.3714936 | 0 | 0            | 0 | -0.096616291 |
| cov2_3_4_5_8_9_10_11 | 50.1404 | -224.138 | 0.368442  | 0 | 0            | 0 | -0.07572808  |
| cov2_3_4_5_7_9_10_11 | 50.1939 | -224.165 | 0.3688982 | 0 | 0            | 0 | -0.076682146 |
| cov2_3_4_6_7_8_9_11  | 50.3536 | -224.245 | 0.3690729 | 0 | 0            | 0 | -0.084721685 |
| cov2_3_4_5_6_7_8_11  | 50.3556 | -224.246 | 0.366148  | 0 | 0            | 0 | -0.09990369  |
| cov2_3_4_6_7_8_10_11 | 50.408  | -224.272 | 0.3694264 | 0 | 0            | 0 | -0.084863561 |
| cov2_3_4_7_8_9_10_11 | 50.4117 | -224.274 | 0.3697783 | 0 | 0            | 0 | -0.080405191 |
| cov2_3_4_6_7_8_9_10  | 50.4686 | -224.302 | 0.367528  | 0 | 0            | 0 | -0.079393414 |
| cov2_3_4_5_7_8_9_10  | 50.4763 | -224.306 | 0.3670528 | 0 | 0            | 0 | -0.061694096 |
| cov2_4_5_6_7_8_9_11  | 50.4866 | -224.311 | 0.3756617 | 0 | 0            | 0 | -0.11243153  |
| cov2_4_5_6_7_8_10_11 | 50.51   | -224.323 | 0.3760207 | 0 | 0            | 0 | -0.11181556  |
| cov2_3_4_6_8_9_10_11 | 50.5376 | -224.337 | 0.3687085 | 0 | 0            | 0 | -0.083372301 |
| cov2_3_4_6_7_9_10_11 | 50.5836 | -224.36  | 0.3692109 | 0 | 0            | 0 | -0.084153528 |
| cov2_4_5_6_7_8_9_10  | 50.6758 | -224.406 | 0.3737581 | 0 | 0            | 0 | -0.10350051  |
| cov2_3_5_6_7_8_9_11  | 50.6832 | -224.41  | 0.3619168 | 0 | 0            | 0 | -0.040232955 |
| cov2_4_5_7_8_9_10_11 | 50.728  | -224.432 | 0.3769693 | 0 | 0            | 0 | -0.10021574  |
| cov2_4_5_6_7_9_10_11 | 50.7352 | -224.436 | 0.3759542 | 0 | 0            | 0 | -0.11084079  |
| cov2_3_5_6_7_8_10_11 | 50.7478 | -224.442 | 0.3623387 | 0 | 0            | 0 | -0.039855034 |
| cov2_4_5_6_8_9_10_11 | 50.7512 | -224.444 | 0.375822  | 0 | 0            | 0 | -0.11098325  |
| cov3_4_5_6_7_8_9_11  | 50.8017 | -224.469 | 0.3585936 | 0 | 0            | 0 | 0            |
| cov2_3_6_7_8_9_10_11 | 50.8208 | -224.479 | 0.3645069 | 0 | 0            | 0 | -0.049636276 |
| cov3_4_5_6_7_8_10_11 | 50.8442 | -224.49  | 0.3591034 | 0 | 0            | 0 | 0            |
| cov2_3_5_6_7_8_9_10  | 50.8472 | -224.492 | 0.3606611 | 0 | 0            | 0 | -0.035578175 |
| cov2_3_5_6_8_9_10_11 | 50.8724 | -224.504 | 0.361679  | 0 | 0            | 0 | -0.038902874 |
| cov3_4_5_6_7_8_9_10  | 50.8826 | -224.509 | 0.3580925 | 0 | 0            | 0 | 0            |
| cov2_3_5_6_7_9_10_11 | 50.9514 | -224.544 | 0.3622774 | 0 | 0            | 0 | -0.039544284 |

|                        |         |          |           |   |             |   |              |
|------------------------|---------|----------|-----------|---|-------------|---|--------------|
| cov3_4_5_6_8_9_10_11   | 50.9537 | -224.545 | 0.3585928 | 0 | 0           | 0 | 0            |
| cov2_4_6_7_8_9_10_11   | 50.9606 | -224.548 | 0.3764235 | 0 | 0           | 0 | -0.10423164  |
| cov2_3_5_7_8_9_10_11   | 50.9836 | -224.56  | 0.3648551 | 0 | 0           | 0 | -0.033735278 |
| cov3_4_5_7_8_9_10_11   | 50.9933 | -224.565 | 0.3615057 | 0 | 0           | 0 | 0            |
| cov3_4_5_6_7_9_10_11   | 51.0497 | -224.593 | 0.3591085 | 0 | 0           | 0 | 0            |
| cov3_5_6_7_8_9_10_11   | 51.0785 | -224.607 | 0.3588337 | 0 | 0           | 0 | 0            |
| cov3_4_6_7_8_9_10_11   | 51.5369 | -224.837 | 0.3623252 | 0 | 0           | 0 | 0            |
| cov2_5_6_7_8_9_10_11   | 52.1975 | -225.167 | 0.374042  | 0 | 0           | 0 | -0.057653851 |
| cov4_5_6_7_8_9_10_11   | 52.7074 | -225.422 | 0.3709081 | 0 | 0           | 0 | 0            |
| cov1_2_4_5_6_7_8_9_11  | 53.6857 | -222.401 | 0.3765292 | 0 | -0.27796985 | 0 | -0.027494255 |
| cov1_2_4_5_6_7_8_10_11 | 53.6971 | -222.407 | 0.3766845 | 0 | -0.27849522 | 0 | -0.027201576 |
| cov1_3_4_5_6_7_8_9_11  | 53.7052 | -222.411 | 0.3726976 | 0 | -0.28198392 | 0 | 0            |
| cov1_3_4_5_6_7_8_10_11 | 53.7181 | -222.417 | 0.372929  | 0 | -0.2827858  | 0 | 0            |
| cov1_2_3_5_6_7_8_9_11  | 53.7794 | -222.448 | 0.3730679 | 0 | -0.28465139 | 0 | -0.00336839  |
| cov1_3_5_6_7_8_9_10_11 | 53.782  | -222.449 | 0.3728982 | 0 | -0.28668526 | 0 | 0            |
| cov1_4_5_6_7_8_9_10_11 | 53.7864 | -222.451 | 0.3757194 | 0 | -0.30045365 | 0 | 0            |
| cov1_2_3_5_6_7_8_10_11 | 53.7949 | -222.455 | 0.373279  | 0 | -0.28584438 | 0 | -0.003092884 |
| cov1_2_3_4_5_6_7_8_11  | 53.8021 | -222.459 | 0.3742819 | 0 | -0.28031897 | 0 | -0.026016049 |
| cov1_2_5_6_7_8_9_10_11 | 53.8546 | -222.485 | 0.376001  | 0 | -0.30152166 | 0 | -0.004725888 |
| cov1_2_3_4_6_7_8_9_11  | 53.9175 | -222.517 | 0.3706773 | 0 | -0.20228596 | 0 | -0.042200584 |
| cov1_2_3_4_6_7_8_10_11 | 53.9345 | -222.525 | 0.3709849 | 0 | -0.20324897 | 0 | -0.041884151 |
| cov1_2_3_4_5_6_7_9_11  | 54.0185 | -222.567 | 0.3738844 | 0 | -0.2561835  | 0 | -0.026150228 |
| cov1_2_3_4_5_6_7_10_11 | 54.0333 | -222.575 | 0.3741106 | 0 | -0.25726108 | 0 | -0.025908696 |
| cov1_2_3_4_5_6_8_9_11  | 54.0471 | -222.582 | 0.3729303 | 0 | -0.24970794 | 0 | -0.026490407 |
| cov1_2_3_4_5_6_9_10_11 | 54.0588 | -222.587 | 0.3718221 | 0 | -0.24265553 | 0 | -0.026842401 |
| cov1_2_3_4_5_6_8_10_11 | 54.0626 | -222.589 | 0.3731567 | 0 | -0.25081597 | 0 | -0.026252716 |
| cov1_2_4_5_6_7_9_10_11 | 54.0896 | -222.603 | 0.3767663 | 0 | -0.27206237 | 0 | -0.02790562  |
| cov1_3_4_5_6_7_9_10_11 | 54.1098 | -222.613 | 0.3728661 | 0 | -0.27621745 | 0 | 0            |
| cov1_3_4_5_6_8_9_10_11 | 54.1409 | -222.628 | 0.3718895 | 0 | -0.26997278 | 0 | 0            |
| cov1_2_4_5_6_8_9_10_11 | 54.1638 | -222.64  | 0.3765957 | 0 | -0.26948882 | 0 | -0.028801886 |
| cov1_3_4_6_7_8_9_10_11 | 54.1838 | -222.65  | 0.3678268 | 0 | -0.21830058 | 0 | 0            |
| cov1_2_3_5_6_7_9_10_11 | 54.1879 | -222.652 | 0.373224  | 0 | -0.27906981 | 0 | -0.003356516 |
| cov1_2_3_5_6_8_9_10_11 | 54.2278 | -222.672 | 0.3722169 | 0 | -0.27315393 | 0 | -0.002965675 |
| cov1_2_4_6_7_8_9_10_11 | 54.228  | -222.672 | 0.37606   | 0 | -0.20975159 | 0 | -0.054291199 |
| cov1_2_3_4_6_8_9_10_11 | 54.2978 | -222.707 | 0.370236  | 0 | -0.19558405 | 0 | -0.041404383 |
| cov1_2_3_4_6_7_9_10_11 | 54.3133 | -222.715 | 0.3709308 | 0 | -0.19689511 | 0 | -0.042330013 |
| cov1_2_3_4_5_6_7_8_9   | 54.4764 | -222.796 | 0.3694228 | 0 | -0.22777662 | 0 | -0.01924917  |
| cov1_2_3_4_5_6_7_8_10  | 54.4841 | -222.8   | 0.3696773 | 0 | -0.22866592 | 0 | -0.019000324 |
| cov1_3_4_5_6_7_8_9_10  | 54.5242 | -222.82  | 0.3688306 | 0 | -0.24320602 | 0 | 0            |
| cov1_2_4_5_6_7_8_9_10  | 54.5519 | -222.834 | 0.3724641 | 0 | -0.24410515 | 0 | -0.020949416 |
| cov1_2_3_5_6_7_8_9_10  | 54.6228 | -222.869 | 0.3688899 | 0 | -0.24944352 | 0 | 0.002064932  |
| cov1_2_3_4_6_7_8_9_10  | 54.7511 | -222.934 | 0.3666569 | 0 | -0.17073589 | 0 | -0.03492815  |
| cov1_2_3_6_7_8_9_10_11 | 54.8534 | -222.985 | 0.3642441 | 0 | -0.18572588 | 0 | 0.003568996  |
| cov1_2_3_4_5_6_8_9_10  | 54.8698 | -222.993 | 0.3688266 | 0 | -0.21645316 | 0 | -0.0200426   |
| cov1_2_3_4_5_6_7_9_10  | 54.8725 | -222.994 | 0.3696765 | 0 | -0.22179877 | 0 | -0.019602711 |
| cov1_2_3_4_5_7_8_9_11  | 55.5579 | -223.337 | 0.3761002 | 0 | -0.16477434 | 0 | -0.026935971 |
| cov1_2_3_4_5_7_8_10_11 | 55.5636 | -223.34  | 0.3762137 | 0 | -0.1657206  | 0 | -0.026823479 |



|                            |         |          |           |   |             |   |              |
|----------------------------|---------|----------|-----------|---|-------------|---|--------------|
| cov1_2_4_5_7_8_9_10_11     | 55.6311 | -223.374 | 0.378997  | 0 | -0.18088102 | 0 | -0.028760191 |
| cov1_3_4_5_7_8_9_10_11     | 55.6545 | -223.385 | 0.3750343 | 0 | -0.18536669 | 0 | 0            |
| cov1_2_3_5_7_8_9_10_11     | 55.777  | -223.447 | 0.3754781 | 0 | -0.18954063 | 0 | -0.001011966 |
| cov1_2_3_4_5_7_9_10_11     | 55.793  | -223.455 | 0.376123  | 0 | -0.1639205  | 0 | -0.027251568 |
| cov1_2_3_4_5_8_9_10_11     | 55.8124 | -223.464 | 0.3753781 | 0 | -0.15912577 | 0 | -0.027521944 |
| cov1_2_3_4_7_8_9_10_11     | 55.8741 | -223.495 | 0.3729521 | 0 | -0.10294349 | 0 | -0.04377005  |
| cov2_3_4_5_6_7_8_9_11      | 56.5103 | -223.813 | 0.3656262 | 0 | 0           | 0 | -0.089295406 |
| cov2_3_4_5_6_7_8_10_11     | 56.557  | -223.837 | 0.3660583 | 0 | 0           | 0 | -0.089228479 |
| cov1_2_3_4_5_7_8_9_10      | 56.6604 | -223.888 | 0.3716087 | 0 | -0.11930885 | 0 | -0.019605149 |
| cov2_3_4_5_6_8_9_10_11     | 56.7107 | -223.913 | 0.3653964 | 0 | 0           | 0 | -0.087618362 |
| cov2_3_4_5_6_7_9_10_11     | 56.789  | -223.953 | 0.3659917 | 0 | 0           | 0 | -0.088297654 |
| cov2_3_4_5_6_7_8_9_10      | 56.7918 | -223.954 | 0.3638177 | 0 | 0           | 0 | -0.080359174 |
| cov2_3_4_5_7_8_9_10_11     | 56.9949 | -224.055 | 0.368818  | 0 | 0           | 0 | -0.076687013 |
| cov2_3_4_6_7_8_9_10_11     | 57.373  | -224.245 | 0.3690189 | 0 | 0           | 0 | -0.08481799  |
| cov2_4_5_6_7_8_9_10_11     | 57.4937 | -224.305 | 0.3757588 | 0 | 0           | 0 | -0.11188705  |
| cov2_3_5_6_7_8_9_10_11     | 57.7031 | -224.41  | 0.3619447 | 0 | 0           | 0 | -0.04015724  |
| cov3_4_5_6_7_8_9_10_11     | 57.8146 | -224.465 | 0.3587445 | 0 | 0           | 0 | 0            |
| cov1_2_3_4_5_6_7_8_9_11    | 60.6369 | -222.366 | 0.3737161 | 0 | -0.26219327 | 0 | -0.025729772 |
| cov1_2_3_4_5_6_7_8_10_11   | 60.6515 | -222.374 | 0.3739406 | 0 | -0.26326749 | 0 | -0.025489973 |
| cov1_2_4_5_6_7_8_9_10_11   | 60.7056 | -222.401 | 0.3765457 | 0 | -0.27783547 | 0 | -0.027443252 |
| cov1_3_4_5_6_7_8_9_10_11   | 60.7253 | -222.411 | 0.3727153 | 0 | -0.28192749 | 0 | 0            |
| cov1_2_3_5_6_7_8_9_10_11   | 60.7996 | -222.448 | 0.3730576 | 0 | -0.28468056 | 0 | -0.003390597 |
| cov1_2_3_4_6_7_8_9_10_11   | 60.936  | -222.516 | 0.3707541 | 0 | -0.2024556  | 0 | -0.0420266   |
| cov1_2_3_4_5_6_7_9_10_11   | 61.0387 | -222.567 | 0.3738896 | 0 | -0.25616986 | 0 | -0.026141705 |
| cov1_2_3_4_5_6_8_9_10_11   | 61.0673 | -222.582 | 0.3729299 | 0 | -0.24970883 | 0 | -0.026490997 |
| cov1_2_3_4_5_6_7_8_9_10    | 61.4949 | -222.795 | 0.3694914 | 0 | -0.22769176 | 0 | -0.019182133 |
| cov1_2_3_4_5_7_8_9_10_11   | 62.5778 | -223.337 | 0.3760728 | 0 | -0.16485313 | 0 | -0.026975085 |
| cov2_3_4_5_6_7_8_9_10_11   | 63.5289 | -223.812 | 0.3656929 | 0 | 0           | 0 | -0.08914694  |
| cov1_2_3_4_5_6_7_8_9_10_11 | 67.6571 | -222.366 | 0.3737191 | 0 | -0.26214757 | 0 | -0.025735558 |

[illegible]

|   |              |   |              |   |              |   |              |   |              |
|---|--------------|---|--------------|---|--------------|---|--------------|---|--------------|
| 0 | 0            | 0 | 0            | 0 | 0            | 0 | 0            | 0 | 0            |
| 0 | 0            | 0 | 0            | 0 | 0            | 0 | 0            | 0 | 0            |
| 0 | 0            | 0 | 0            | 0 | 0.045720289  | 0 | 0            | 0 | 0            |
| 0 | 0            | 0 | 0            | 0 | 0            | 0 | 0            | 0 | 0            |
| 0 | 0            | 0 | 0            | 0 | 0            | 0 | 0            | 0 | -0.018092118 |
| 0 | 0            | 0 | 0            | 0 | 0            | 0 | 0.013655731  | 0 | 0            |
| 0 | 0            | 0 | 0            | 0 | 0            | 0 | 0            | 0 | 0            |
| 0 | 0            | 0 | 0.036223126  | 0 | 0            | 0 | -0.052485143 | 0 | 0            |
| 0 | 0            | 0 | 0            | 0 | 0.028646392  | 0 | -0.050239297 | 0 | 0            |
| 0 | 0            | 0 | 0            | 0 | 0            | 0 | -0.027976088 | 0 | -0.016796013 |
| 0 | 0            | 0 | 0            | 0 | 0            | 0 | -0.027930742 | 0 | 0            |
| 0 | 0            | 0 | 0            | 0 | 0            | 0 | -0.028127429 | 0 | 0            |
| 0 | 0            | 0 | 0            | 0 | 0.13703493   | 0 | 0.11903507   | 0 | 0            |
| 0 | 0            | 0 | 0.016743926  | 0 | 0            | 0 | 0            | 0 | 0            |
| 0 | 0            | 0 | 0.038944275  | 0 | -0.04457448  | 0 | 0            | 0 | 0            |
| 0 | 0            | 0 | 0            | 0 | 0            | 0 | 0            | 0 | -0.009776778 |
| 0 | 0            | 0 | 0            | 0 | 0            | 0 | 0            | 0 | 0            |
| 0 | 0            | 0 | 0            | 0 | 0            | 0 | 0            | 0 | -0.40049887  |
| 0 | 0            | 0 | 0            | 0 | 0.003751699  | 0 | 0            | 0 | 0            |
| 0 | 0            | 0 | 0            | 0 | -0.011065726 | 0 | 0            | 0 | -0.014811481 |
| 0 | 0            | 0 | 0            | 0 | -0.01101926  | 0 | 0            | 0 | 0            |
| 0 | 0            | 0 | -0.000276213 | 0 | 0            | 0 | 0            | 0 | -0.014345349 |
| 0 | 0            | 0 | -7.59E-05    | 0 | 0            | 0 | 0            | 0 | 0            |
| 0 | 0            | 0 | 0            | 0 | 0.135937     | 0 | 0            | 0 | 0            |
| 0 | 0            | 0 | 0.081306345  | 0 | 0            | 0 | 0.11218692   | 0 | 0            |
| 0 | -0.029666226 | 0 | 0            | 0 | 0.11752438   | 0 | 0            | 0 | 0            |
| 0 | 0            | 0 | 0            | 0 | 0.13859267   | 0 | 0            | 0 | -0.029896351 |
| 0 | 0            | 0 | 0.031805558  | 0 | 0.1074359    | 0 | 0            | 0 | 0            |
| 0 | 0            | 0 | 0            | 0 | 0.13840251   | 0 | 0            | 0 | 0            |
| 0 | 0            | 0 | 0            | 0 | 0.12750236   | 0 | 0            | 0 | 0            |
| 0 | 0            | 0 | 0            | 0 | 0.12738005   | 0 | 0            | 0 | 0            |
| 0 | -0.06563695  | 0 | 0            | 0 | 0            | 0 | 0.12111364   | 0 | 0            |
| 0 | 0            | 0 | 0            | 0 | 0.13610909   | 0 | 0            | 0 | 0            |
| 0 | 0            | 0 | 0            | 0 | 0            | 0 | 0.13406852   | 0 | 0            |
| 0 | 0            | 0 | 0            | 0 | 0            | 0 | 0.13429363   | 0 | 0            |
| 0 | 0            | 0 | 0.084542152  | 0 | 0            | 0 | 0            | 0 | 0            |
| 0 | 0            | 0 | 0.10749561   | 0 | 0            | 0 | 0            | 0 | 0            |
| 0 | -0.03978237  | 0 | 0.067549811  | 0 | 0            | 0 | 0            | 0 | 0            |
| 0 | 0            | 0 | 0.073326751  | 0 | 0            | 0 | 0            | 0 | 0            |
| 0 | 0            | 0 | 0.073561117  | 0 | 0            | 0 | 0            | 0 | 0            |
| 0 | -0.075190679 | 0 | 0            | 0 | 0            | 0 | 0            | 0 | 0            |
| 0 | 0            | 0 | 0.080428213  | 0 | 0            | 0 | 0            | 0 | 0            |
| 0 | 0            | 0 | 0.079966745  | 0 | 0            | 0 | 0            | 0 | 0            |
| 0 | 0            | 0 | 0.083081388  | 0 | 0            | 0 | 0            | 0 | -0.010195915 |
| 0 | 0            | 0 | 0.083322796  | 0 | 0            | 0 | 0            | 0 | 0            |
| 0 | -0.054237398 | 0 | 0            | 0 | 0            | 0 | 0            | 0 | 0            |
| 0 | -0.054780062 | 0 | 0            | 0 | 0            | 0 | 0            | 0 | 0            |

|   |              |   |              |   |              |              |              |
|---|--------------|---|--------------|---|--------------|--------------|--------------|
| 0 | -0.10228577  | 0 | 0            | 0 | 0            | 0            | 0            |
| 0 | 0            | 0 | 0            | 0 | 0            | 0.11149022   | 0            |
| 0 | -0.090250107 | 0 | 0            | 0 | 0            | 0            | 0            |
| 0 | -0.10031294  | 0 | 0            | 0 | 0            | 0            | 0.071203017  |
| 0 | -0.038372012 | 0 | 0.074294135  | 0 | 0            | 0            | 0            |
| 0 | -0.089816198 | 0 | 0            | 0 | 0            | 0            | 0            |
| 0 | -0.087943741 | 0 | 0            | 0 | 0            | 0            | 0.058500982  |
| 0 | -0.087463495 | 0 | 0            | 0 | 0            | 0            | 0.058060809  |
| 0 | -0.054831647 | 0 | 0            | 0 | 0            | 0            | 0            |
| 0 | -0.054350891 | 0 | 0            | 0 | 0            | 0            | 0            |
| 0 | 0            | 0 | 0            | 0 | 0            | 0            | 0            |
| 0 | -0.10749816  | 0 | 0            | 0 | 0            | 0            | 0            |
| 0 | 0            | 0 | 0            | 0 | 0            | 0            | 0            |
| 0 | 0            | 0 | 0            | 0 | 0            | 0            | 0            |
| 0 | 0            | 0 | 0            | 0 | 0            | 0.11870034   | 0            |
| 0 | -0.057307397 | 0 | 0            | 0 | -0.00718875  | 0            | 0            |
| 0 | 0            | 0 | 0.094773608  | 0 | 0            | 0            | 0            |
| 0 | -0.057329483 | 0 | 0            | 0 | 0            | 0            | 0            |
| 0 | 0            | 0 | 0.10981812   | 0 | -0.019809472 | 0            | 0            |
| 0 | -0.057055107 | 0 | 0            | 0 | -0.008464916 | 0            | 0            |
| 0 | -0.05560918  | 0 | 0            | 0 | 0            | 0            | 0            |
| 0 | 0            | 0 | 0            | 0 | 0            | 0.11825057   | 0            |
| 0 | -0.055249255 | 0 | 0.002355806  | 0 | 0            | 0            | 0            |
| 0 | -0.055930902 | 0 | 0            | 0 | 0            | 0.00038563   | 0            |
| 0 | -0.10562883  | 0 | 0            | 0 | 0            | 0            | 0.078361666  |
| 0 | -0.056575294 | 0 | 0            | 0 | 0            | 0            | 0            |
| 0 | -0.055069325 | 0 | 0.001429684  | 0 | 0            | 0            | 0            |
| 0 | -0.055429546 | 0 | 0            | 0 | 0            | -0.001135362 | 0            |
| 0 | 0            | 0 | 0.094807261  | 0 | 0            | 0            | -0.003698955 |
| 0 | 0            | 0 | 0.095151961  | 0 | 0            | 0            | 0            |
| 0 | 0            | 0 | 0.09524729   | 0 | 0            | 0.000230528  | 0            |
| 0 | 0            | 0 | 0            | 0 | 0            | 0.11727911   | 0            |
| 0 | -0.063817083 | 0 | 0            | 0 | 0            | 0            | 0            |
| 0 | -0.12255368  | 0 | 0            | 0 | -0.018176859 | 0            | 0            |
| 0 | -0.1208916   | 0 | 0            | 0 | -0.018072129 | 0            | 0.093914937  |
| 0 | -0.11347579  | 0 | 0            | 0 | 0            | -0.013611094 | 0            |
| 0 | -0.11695189  | 0 | 0            | 0 | 0            | 0            | -0.27459167  |
| 0 | -0.07118263  | 0 | 0            | 0 | 0            | 0            | 0            |
| 0 | 0            | 0 | 0            | 0 | 0            | 0            | -0.026206886 |
| 0 | 0            | 0 | 0            | 0 | 0            | 0            | 0            |
| 0 | 0            | 0 | 0            | 0 | 0            | 0            | -0.025919514 |
| 0 | -0.11167318  | 0 | 0            | 0 | 0            | -0.014073272 | 0.085202222  |
| 0 | 0            | 0 | 0            | 0 | 0            | 0            | 0            |
| 0 | -0.12035348  | 0 | -0.006968285 | 0 | 0            | 0            | 0            |
| 0 | -0.11681765  | 0 | 0            | 0 | 0            | 0            | 0            |
| 0 | -0.05820278  | 0 | 0            | 0 | 0.026773422  | 0            | 0            |
| 0 | 0            | 0 | 0            | 0 | 0            | 0            | 0            |
| 0 | 0            | 0 | 0            | 0 | 0            | 0            | 0            |



|   |              |   |              |   |              |             |              |              |
|---|--------------|---|--------------|---|--------------|-------------|--------------|--------------|
| 0 | 0            | 0 | 0            | 0 | 0            | -0.00118196 | 0            | 0            |
| 0 | 0            | 0 | 0            | 0 | -0.001901093 | 0           | 0.000829004  | 0            |
| 0 | 0            | 0 | 0            | 0 | -0.001303623 | 0           | 0            | 0            |
| 0 | 0            | 0 | 0            | 0 | 0            | 0           | -0.000474057 | 0            |
| 0 | 0            | 0 | 0            | 0 | -0.002496595 | 0           | 0            | 0            |
| 0 | 0            | 0 | 0            | 0 | -0.003230596 | 0           | 0.000502756  | 0            |
| 0 | 0            | 0 | 0            | 0 | 0            | 0           | -0.001418427 | 0            |
| 0 | -0.070678223 | 0 | 0            | 0 | 0            | 0           | -0.03177835  | 0            |
| 0 | -0.062825253 | 0 | 0.014584868  | 0 | 0            | 0           | -0.031348733 | 0            |
| 0 | -0.067275556 | 0 | 0            | 0 | 0.002011745  | 0           | -0.022448514 | 0            |
| 0 | -0.071198048 | 0 | 0.02350698   | 0 | -0.036274383 | 0           | 0            | 0            |
| 0 | 0            | 0 | 0            | 0 | 0            | 0           | 0            | -0.4086856   |
| 0 | -0.076890196 | 0 | 0            | 0 | -0.021769563 | 0           | 0            | 0            |
| 0 | -0.071291712 | 0 | -0.005198933 | 0 | 0            | 0           | 0            | 0            |
| 0 | 0            | 0 | 0            | 0 | 0            | 0           | 0            | -0.021143167 |
| 0 | 0            | 0 | 0            | 0 | 0.045989053  | 0           | 0            | -0.019014623 |
| 0 | 0            | 0 | 0            | 0 | 0            | 0           | 0            | 0            |
| 0 | 0            | 0 | 0            | 0 | 0.045965538  | 0           | 0            | 0            |
| 0 | 0            | 0 | 0            | 0 | 0.052220852  | 0           | -0.014147229 | 0            |
| 0 | 0            | 0 | 0            | 0 | 0.044475333  | 0           | 0            | 0            |
| 0 | 0            | 0 | 0            | 0 | 0            | 0           | 0            | -0.40320047  |
| 0 | 0            | 0 | 0            | 0 | 0            | 0           | 0            | -0.024405877 |
| 0 | 0            | 0 | 0            | 0 | 0            | 0           | 0            | 0            |
| 0 | 0            | 0 | 0            | 0 | 0            | 0           | 0.013382948  | -0.017834894 |
| 0 | 0            | 0 | 0            | 0 | 0            | 0           | 0.006593353  | 0            |
| 0 | 0            | 0 | 0            | 0 | 0            | 0           | 0.013349976  | 0            |
| 0 | 0            | 0 | 0.035205146  | 0 | 0            | 0           | -0.052090944 | -0.0110538   |
| 0 | 0            | 0 | 0.035461321  | 0 | 0            | 0           | -0.05221672  | 0            |
| 0 | 0            | 0 | 0.036736055  | 0 | 0            | 0           | -0.049776179 | 0            |
| 0 | 0            | 0 | 0.03940598   | 0 | -0.00528837  | 0           | -0.050483701 | 0            |
| 0 | 0            | 0 | 0            | 0 | 0.13677198   | 0           | 0.11314937   | 0            |
| 0 | -0.031905526 | 0 | 0            | 0 | 0.11694411   | 0           | 0.12056807   | 0            |
| 0 | 0            | 0 | 0            | 0 | 0.028983564  | 0           | -0.050993424 | -0.017481047 |
| 0 | 0            | 0 | 0            | 0 | 0.029015765  | 0           | -0.050980756 | 0            |
| 0 | 0            | 0 | 0            | 0 | 0            | 0           | -0.027228589 | -0.37735469  |
| 0 | 0            | 0 | 0            | 0 | 0.029944086  | 0           | -0.047537769 | 0            |
| 0 | 0            | 0 | 0            | 0 | 0.13969856   | 0           | 0.1207469    | -0.033243977 |
| 0 | 0            | 0 | 0            | 0 | 0.13943854   | 0           | 0.12018103   | 0            |
| 0 | 0            | 0 | 0            | 0 | 0.1191784    | 0           | 0.1252193    | 0            |
| 0 | 0            | 0 | 0            | 0 | 0.1189568    | 0           | 0.12501833   | 0            |
| 0 | 0            | 0 | 0.026166604  | 0 | 0.11335668   | 0           | 0.11706558   | 0            |
| 0 | 0            | 0 | 0            | 0 | 0            | 0           | -0.031220994 | -0.01815098  |
| 0 | 0            | 0 | 0            | 0 | 0            | 0           | -0.030798603 | 0            |
| 0 | 0            | 0 | 0.037719705  | 0 | -0.029598033 | 0           | 0            | 0            |
| 0 | 0            | 0 | 0            | 0 | 0            | 0           | 0            | -0.39330898  |
| 0 | 0            | 0 | 0            | 0 | 0.13711061   | 0           | 0.11913543   | 0            |
| 0 | 0            | 0 | 0.016132286  | 0 | 0            | 0           | 0            | -0.003862804 |

|   |              |   |              |   |              |            |   |              |
|---|--------------|---|--------------|---|--------------|------------|---|--------------|
| 0 | 0            | 0 | 0.01659726   | 0 | 0            | 0          | 0 | 0            |
| 0 | 0            | 0 | 0.037224239  | 0 | -0.043202356 | 0          | 0 | -0.007987687 |
| 0 | 0            | 0 | 0.037853392  | 0 | -0.043702442 | 0          | 0 | 0            |
| 0 | 0            | 0 | 0            | 0 | -0.011215183 | 0          | 0 | -0.40300385  |
| 0 | 0            | 0 | 0            | 0 | 0.00269798   | 0          | 0 | -0.009203971 |
| 0 | 0            | 0 | 0            | 0 | 0.00303555   | 0          | 0 | 0            |
| 0 | 0            | 0 | -0.000430096 | 0 | 0            | 0          | 0 | -0.4006733   |
| 0 | 0            | 0 | 0.067177912  | 0 | 0            | 0.12539514 | 0 | 0            |
| 0 | 0            | 0 | 0.067332068  | 0 | 0            | 0.12548976 | 0 | 0            |
| 0 | -0.04230109  | 0 | 0            | 0 | 0.10925387   | 0          | 0 | 0            |
| 0 | 0            | 0 | 0            | 0 | 0.13991097   | 0          | 0 | -0.050690835 |
| 0 | -0.043237238 | 0 | 0.063379019  | 0 | 0            | 0.11572524 | 0 | 0            |
| 0 | 0            | 0 | 0.10589192   | 0 | 0            | 0.11424532 | 0 | 0            |
| 0 | 0            | 0 | 0            | 0 | 0.13971158   | 0          | 0 | 0            |
| 0 | 0            | 0 | 0.081986692  | 0 | 0            | 0.10598779 | 0 | 0            |
| 0 | -0.054946431 | 0 | 0            | 0 | 0            | 0.134442   | 0 | 0            |
| 0 | -0.05433598  | 0 | 0            | 0 | 0            | 0.13412494 | 0 | 0            |
| 0 | -0.076027527 | 0 | 0            | 0 | 0            | 0.11321774 | 0 | 0            |
| 0 | 0            | 0 | 0.033081505  | 0 | 0.10600759   | 0          | 0 | 0            |
| 0 | 0            | 0 | 0            | 0 | 0.12851843   | 0          | 0 | 0            |
| 0 | 0            | 0 | 0            | 0 | 0.12876334   | 0          | 0 | 0            |
| 0 | 0            | 0 | 0            | 0 | 0.13606025   | 0          | 0 | 0            |
| 0 | -0.10386231  | 0 | 0            | 0 | 0            | 0.12041762 | 0 | 0            |
| 0 | -0.052184868 | 0 | 0.06317723   | 0 | 0            | 0          | 0 | 0            |
| 0 | 0            | 0 | 0.080127052  | 0 | 0            | 0.11295816 | 0 | -0.013664598 |
| 0 | -0.10105829  | 0 | 0            | 0 | 0            | 0.11960033 | 0 | 0.068641374  |
| 0 | 0            | 0 | 0.080447568  | 0 | 0            | 0.11262652 | 0 | 0            |
| 0 | 0            | 0 | 0.1113897    | 0 | 0            | 0          | 0 | 0            |
| 0 | -0.026700559 | 0 | 0.026732798  | 0 | 0.095209382  | 0          | 0 | 0            |
| 0 | 0            | 0 | 0            | 0 | 0.13809658   | 0          | 0 | -0.3966859   |
| 0 | 0            | 0 | 0            | 0 | 0            | 0.12820305 | 0 | 0            |
| 0 | 0            | 0 | 0            | 0 | 0            | 0.12839573 | 0 | 0            |
| 0 | -0.029764989 | 0 | 0            | 0 | 0.10856606   | 0          | 0 | 0            |
| 0 | -0.029669715 | 0 | 0            | 0 | 0.10868458   | 0          | 0 | 0            |
| 0 | 0            | 0 | 0.026311068  | 0 | 0.11439304   | 0          | 0 | -0.024921607 |
| 0 | 0            | 0 | 0.026959188  | 0 | 0.1136027    | 0          | 0 | 0            |
| 0 | -0.029880117 | 0 | 0            | 0 | 0.11719443   | 0          | 0 | 0            |
| 0 | 0            | 0 | 0.04992452   | 0 | 0.092249067  | 0          | 0 | 0            |
| 0 | -0.032042392 | 0 | 0            | 0 | 0.11573479   | 0          | 0 | 0            |
| 0 | -0.02734828  | 0 | 0            | 0 | 0.11926506   | 0          | 0 | -0.003519457 |
| 0 | 0            | 0 | 0.033798002  | 0 | 0.094649498  | 0          | 0 | 0            |
| 0 | 0            | 0 | 0.033544939  | 0 | 0.095319369  | 0          | 0 | 0            |
| 0 | 0            | 0 | 0            | 0 | 0.1292379    | 0          | 0 | -0.030450452 |
| 0 | 0            | 0 | 0            | 0 | 0.12904722   | 0          | 0 | -0.030484095 |
| 0 | 0            | 0 | 0.074484832  | 0 | 0            | 0          | 0 | 0            |
| 0 | 0            | 0 | 0            | 0 | 0.12908284   | 0          | 0 | 0            |
| 0 | 0            | 0 | 0            | 0 | 0.12889814   | 0          | 0 | 0            |

|   |              |   |             |   |              |   |            |              |
|---|--------------|---|-------------|---|--------------|---|------------|--------------|
| 0 | 0            | 0 | 0.074627572 | 0 | 0            | 0 | 0          | 0            |
| 0 | 0            | 0 | 0           | 0 | 0.13847526   | 0 | 0          | -0.029940777 |
| 0 | 0            | 0 | 0           | 0 | 0            | 0 | 0.13607784 | -0.030892147 |
| 0 | 0            | 0 | 0           | 0 | 0.13828766   | 0 | 0          | 0            |
| 0 | 0            | 0 | 0           | 0 | 0            | 0 | 0.13627729 | -0.030592511 |
| 0 | 0            | 0 | 0           | 0 | 0            | 0 | 0.13549335 | 0            |
| 0 | 0            | 0 | 0           | 0 | 0            | 0 | 0.13569755 | 0            |
| 0 | -0.066688125 | 0 | 0           | 0 | 0            | 0 | 0          | 0            |
| 0 | -0.066233532 | 0 | 0           | 0 | 0            | 0 | 0          | 0            |
| 0 | 0            | 0 | 0           | 0 | 0.12724663   | 0 | 0          | 0            |
| 0 | 0            | 0 | 0           | 0 | 0.12707721   | 0 | 0          | 0            |
| 0 | 0            | 0 | 0           | 0 | 0.12730199   | 0 | 0          | 0            |
| 0 | -0.065806009 | 0 | 0           | 0 | 0            | 0 | 0.12073814 | 0            |
| 0 | 0            | 0 | 0           | 0 | 0            | 0 | 0.13439955 | 0            |
| 0 | 0            | 0 | 0           | 0 | 0            | 0 | 0.13371587 | 0            |
| 0 | 0            | 0 | 0           | 0 | 0            | 0 | 0.13398106 | 0            |
| 0 | -0.035409089 | 0 | 0.059954953 | 0 | 0            | 0 | 0          | 0            |
| 0 | -0.035902407 | 0 | 0.059882791 | 0 | 0            | 0 | 0          | 0            |
| 0 | 0            | 0 | 0.082094294 | 0 | 0            | 0 | 0          | -0.029773973 |
| 0 | 0            | 0 | 0.095049813 | 0 | 0            | 0 | 0          | 0            |
| 0 | 0            | 0 | 0.095492288 | 0 | 0            | 0 | 0          | 0            |
| 0 | 0            | 0 | 0.082382764 | 0 | 0            | 0 | 0          | 0            |
| 0 | -0.030634635 | 0 | 0.089944831 | 0 | 0            | 0 | 0          | 0            |
| 0 | -0.070172532 | 0 | 0.059519885 | 0 | 0            | 0 | 0          | 0            |
| 0 | -0.10262617  | 0 | 0           | 0 | 0            | 0 | 0          | 0            |
| 0 | -0.067668413 | 0 | 0.060213765 | 0 | 0            | 0 | 0          | 0.049009561  |
| 0 | -0.10042002  | 0 | 0           | 0 | 0            | 0 | 0          | 0.051249173  |
| 0 | 0            | 0 | 0.10675688  | 0 | 0            | 0 | 0          | -0.005989971 |
| 0 | 0            | 0 | 0.10709485  | 0 | 0            | 0 | 0          | 0            |
| 0 | 0            | 0 | 0.071692471 | 0 | 0            | 0 | 0          | -0.01523558  |
| 0 | 0            | 0 | 0.07198972  | 0 | 0            | 0 | 0          | 0            |
| 0 | 0            | 0 | 0.071963533 | 0 | 0            | 0 | 0          | -0.014974882 |
| 0 | 0            | 0 | 0.072258775 | 0 | 0            | 0 | 0          | 0            |
| 0 | 0            | 0 | 0.073272345 | 0 | 0            | 0 | 0          | 0            |
| 0 | -0.075251132 | 0 | 0           | 0 | 0            | 0 | 0          | 0            |
| 0 | -0.03399133  | 0 | 0.062865278 | 0 | 0            | 0 | 0          | 0            |
| 0 | -0.0337712   | 0 | 0.062635971 | 0 | 0            | 0 | 0          | 0            |
| 0 | -0.086334335 | 0 | 0           | 0 | 0            | 0 | 0          | 0            |
| 0 | -0.085535338 | 0 | 0           | 0 | 0            | 0 | 0          | 0            |
| 0 | 0            | 0 | 0.082792698 | 0 | 0            | 0 | 0          | -0.38465109  |
| 0 | -0.083908175 | 0 | 0           | 0 | 0            | 0 | 0          | 0.053064265  |
| 0 | -0.074023233 | 0 | 0.0625445   | 0 | 0            | 0 | 0          | 0            |
| 0 | -0.083055927 | 0 | 0           | 0 | 0            | 0 | 0          | 0.052150866  |
| 0 | 0            | 0 | 0.079226758 | 0 | 0            | 0 | 0          | 0            |
| 0 | 0            | 0 | 0           | 0 | 0            | 0 | 0.11211891 | -0.041999458 |
| 0 | 0            | 0 | 0.078920203 | 0 | 0            | 0 | 0          | 0            |
| 0 | 0            | 0 | 0.096770064 | 0 | -0.022578948 | 0 | 0          | 0            |



|   |              |   |             |   |              |   |             |              |
|---|--------------|---|-------------|---|--------------|---|-------------|--------------|
| 0 | -0.07155794  | 0 | 0.063424503 | 0 | 0            | 0 | 0           | 0.056864514  |
| 0 | 0            | 0 | 0.097321724 | 0 | -0.024201083 | 0 | 0           | 0            |
| 0 | 0            | 0 | 0.076023643 | 0 | 0            | 0 | 0.018389424 | 0            |
| 0 | 0            | 0 | 0.075921062 | 0 | 0            | 0 | 0.016970288 | 0            |
| 0 | 0            | 0 | 0           | 0 | 0            | 0 | 0.11157606  | 0            |
| 0 | 0            | 0 | 0.078697194 | 0 | 0            | 0 | 0           | -0.010888734 |
| 0 | 0            | 0 | 0.079127751 | 0 | 0            | 0 | 0           | 0            |
| 0 | 0            | 0 | 0.078180002 | 0 | 0            | 0 | 0           | -0.011052147 |
| 0 | 0            | 0 | 0.080080513 | 0 | 0            | 0 | 0           | 0            |
| 0 | 0            | 0 | 0.078617657 | 0 | 0            | 0 | 0           | 0            |
| 0 | -0.060833762 | 0 | 0           | 0 | 0            | 0 | 0           | 0            |
| 0 | -0.099817072 | 0 | 0           | 0 | 0            | 0 | 0           | -0.29914466  |
| 0 | -0.087681952 | 0 | 0           | 0 | 0            | 0 | 0           | 0            |
| 0 | -0.044395696 | 0 | 0.070163143 | 0 | 0            | 0 | 0           | 0            |
| 0 | -0.087104699 | 0 | 0           | 0 | 0            | 0 | 0           | 0            |
| 0 | -0.060269707 | 0 | 0           | 0 | 0            | 0 | 0           | 0            |
| 0 | -0.054501506 | 0 | 0           | 0 | 0            | 0 | 0           | 0            |
| 0 | -0.085310679 | 0 | 0           | 0 | 0            | 0 | 0           | 0.055509723  |
| 0 | -0.05505426  | 0 | 0           | 0 | 0            | 0 | 0           | 0            |
| 0 | -0.054690757 | 0 | 0           | 0 | 0            | 0 | 0.03510961  | 0            |
| 0 | -0.087757149 | 0 | 0           | 0 | 0            | 0 | 0           | -0.29318549  |
| 0 | -0.054322127 | 0 | 0           | 0 | 0            | 0 | 0           | 0            |
| 0 | -0.084684221 | 0 | 0           | 0 | 0            | 0 | 0           | 0.054887715  |
| 0 | -0.054256339 | 0 | 0           | 0 | 0            | 0 | 0.033401408 | 0            |
| 0 | -0.10264151  | 0 | 0           | 0 | 0            | 0 | 0           | 0            |
| 0 | -0.087286176 | 0 | 0           | 0 | 0            | 0 | 0           | -0.29402862  |
| 0 | -0.094198415 | 0 | 0           | 0 | -0.010582829 | 0 | 0           | 0            |
| 0 | 0            | 0 | 0           | 0 | 0            | 0 | 0           | -0.045645947 |
| 0 | -0.038361814 | 0 | 0.088797339 | 0 | -0.019757236 | 0 | 0           | 0            |
| 0 | -0.093988467 | 0 | 0           | 0 | -0.011618257 | 0 | 0           | 0            |
| 0 | 0            | 0 | 0           | 0 | 0            | 0 | 0           | -0.045566124 |
| 0 | -0.10066314  | 0 | 0           | 0 | 0            | 0 | 0           | 0.071316811  |
| 0 | 0            | 0 | 0           | 0 | 0            | 0 | 0.12516984  | -0.53291413  |
| 0 | -0.090799858 | 0 | 0           | 0 | 0            | 0 | 0           | 0            |
| 0 | -0.091806673 | 0 | 0           | 0 | -0.010327711 | 0 | 0           | 0.061901058  |
| 0 | 0            | 0 | 0           | 0 | 0            | 0 | 0.11153065  | 0            |
| 0 | 0            | 0 | 0           | 0 | 0            | 0 | 0           | 0            |
| 0 | -0.090409046 | 0 | 0           | 0 | 0            | 0 | 0.001687984 | 0            |
| 0 | -0.089904463 | 0 | 0.000957525 | 0 | 0            | 0 | 0           | 0            |
| 0 | -0.090053775 | 0 | 0           | 0 | 0            | 0 | 0           | 0            |
| 0 | -0.03903732  | 0 | 0.07309209  | 0 | 0            | 0 | 0.005602365 | 0            |
| 0 | 0            | 0 | 0           | 0 | 0            | 0 | 0           | 0            |
| 0 | -0.091560122 | 0 | 0           | 0 | -0.011377907 | 0 | 0           | 0.061621591  |
| 0 | -0.090240547 | 0 | 0           | 0 | 0            | 0 | 0           | 0            |
| 0 | -0.08976743  | 0 | 0.00013736  | 0 | 0            | 0 | 0           | 0            |
| 0 | -0.08983685  | 0 | 0           | 0 | 0            | 0 | 0.000207527 | 0            |
| 0 | -0.088503717 | 0 | 0           | 0 | 0            | 0 | 0           | 0.057660079  |

|   |              |   |              |   |              |             |              |              |
|---|--------------|---|--------------|---|--------------|-------------|--------------|--------------|
| 0 | -0.088073455 | 0 | 0            | 0 | 0            | 0.001480884 | 0            | 0.058646534  |
| 0 | -0.087552791 | 0 | 0.001085166  | 0 | 0            | 0           | 0            | 0.058350251  |
| 0 | -0.087706084 | 0 | 0            | 0 | 0            | 0           | 0            | 0.058244867  |
| 0 | -0.050579059 | 0 | 0            | 0 | 0.017939792  | 0           | 0            | 0            |
| 0 | -0.087899862 | 0 | 0            | 0 | 0            | 0           | 0            | 0.057503245  |
| 0 | -0.087372268 | 0 | 0.000257924  | 0 | 0            | 0           | 0            | 0.058027025  |
| 0 | -0.087463759 | 0 | 0            | 0 | 0            | -6.93E-07   | 0            | 0.058060867  |
| 0 | -0.050491021 | 0 | 0            | 0 | 0.016719976  | 0           | 0            | 0            |
| 0 | -0.10930105  | 0 | 0            | 0 | 0            | 0           | 0            | 0            |
| 0 | -0.054489888 | 0 | 0            | 0 | 0            | 0           | 0            | 0            |
| 0 | -0.053483061 | 0 | 0.031968099  | 0 | -0.034346753 | 0           | 0            | 0            |
| 0 | -0.10738241  | 0 | 0            | 0 | 0            | 0           | 0            | 0.072415761  |
| 0 | -0.053023764 | 0 | 0.033000325  | 0 | -0.03650891  | 0           | 0            | 0            |
| 0 | 0            | 0 | 0.1193392    | 0 | -0.033933072 | 0           | 0            | 0            |
| 0 | -0.065213288 | 0 | 0            | 0 | -0.022288591 | 0           | 0            | 0            |
| 0 | -0.10516373  | 0 | 0            | 0 | 0            | 0           | 0            | -0.28915696  |
| 0 | -0.10970771  | 0 | 0            | 0 | 0            | 0.02175123  | 0            | 0            |
| 0 | 0            | 0 | 0.09434481   | 0 | 0            | 0           | 0            | -0.36983407  |
| 0 | -0.06469222  | 0 | 0            | 0 | -0.02310914  | 0           | 0            | 0            |
| 0 | -0.06124252  | 0 | 0            | 0 | -0.02365454  | 0           | 0.021952447  | 0            |
| 0 | -0.10766319  | 0 | 0            | 0 | 0            | 0.021126116 | 0            | 0.080631784  |
| 0 | -0.10153635  | 0 | 0            | 0 | 0.011511921  | 0           | 0            | 0            |
| 0 | -0.060809497 | 0 | 0            | 0 | -0.024501498 | 0           | 0.021154778  | 0            |
| 0 | 0            | 0 | 0            | 0 | 0            | 0           | 0            | 0            |
| 0 | 0            | 0 | 0            | 0 | 0            | 0           | 0            | 0            |
| 0 | 0            | 0 | 0            | 0 | 0            | 0           | 0            | 0            |
| 0 | 0            | 0 | 0.11399916   | 0 | -0.02805723  | 0           | 0.01252299   | 0            |
| 0 | 0            | 0 | 0.095916748  | 0 | 0            | 0           | -0.008344578 | 0            |
| 0 | 0            | 0 | 0.093607423  | 0 | 0            | 0           | 0            | -0.008667301 |
| 0 | -0.057003129 | 0 | 0            | 0 | -0.00754075  | 0           | 0            | 0            |
| 0 | -0.058229458 | 0 | 0            | 0 | 0            | 0           | -0.008186179 | 0            |
| 0 | 0            | 0 | 0            | 0 | 0            | 0           | 0.11848055   | -0.024285238 |
| 0 | 0            | 0 | 0.094003534  | 0 | 0            | 0           | 0            | 0            |
| 0 | -0.057013637 | 0 | 0            | 0 | 0            | 0           | 0            | 0            |
| 0 | -0.058199513 | 0 | -0.0020724   | 0 | 0            | 0           | 0            | 0            |
| 0 | 0            | 0 | 0.11022575   | 0 | -0.020077663 | 0           | 0            | 0            |
| 0 | 0            | 0 | 0.10955582   | 0 | -0.01963799  | 0           | 0            | -0.001063752 |
| 0 | -0.099155236 | 0 | 0            | 0 | 0.012421182  | 0           | 0            | 0.072204617  |
| 0 | -0.05499134  | 0 | 0.002210463  | 0 | 0            | 0           | 0            | 0            |
| 0 | -0.055617808 | 0 | 0            | 0 | 0            | 0           | 0.000227002  | 0            |
| 0 | 0            | 0 | 0            | 0 | 0            | 0           | 0.11803367   | 0            |
| 0 | -0.054598991 | 0 | 0.004289414  | 0 | 0            | 0           | -0.002964981 | 0            |
| 0 | -0.057616851 | 0 | 0            | 0 | 0            | 0           | -0.009186982 | 0            |
| 0 | -0.057514425 | 0 | -0.002232388 | 0 | 0            | 0           | 0            | 0            |
| 0 | -0.054050455 | 0 | 0.004470026  | 0 | 0            | 0           | -0.004611387 | 0            |
| 0 | 0            | 0 | 0.094771057  | 0 | 0            | 0           | 0.000241593  | -0.003699926 |
| 0 | 0            | 0 | 0.095117985  | 0 | 0            | 0           | 0.000227924  | 0            |

[illegible]

|   |             |   |             |   |              |   |              |   |              |
|---|-------------|---|-------------|---|--------------|---|--------------|---|--------------|
| 0 | 0           | 0 | 0           | 0 | 0            | 0 | 0.028228365  | 0 | 0            |
| 0 | 0           | 0 | 0           | 0 | 0            | 0 | 0            | 0 | -0.38560413  |
| 0 | 0           | 0 | 0           | 0 | 0.031938448  | 0 | 0            | 0 | 0            |
| 0 | -0.11714026 | 0 | -0.00490644 | 0 | 0            | 0 | 0            | 0 | 0.091128044  |
| 0 | 0           | 0 | 0           | 0 | 0            | 0 | 0            | 0 | 0            |
| 0 | 0           | 0 | 0           | 0 | 0            | 0 | 0            | 0 | -0.041062999 |
| 0 | 0           | 0 | 0           | 0 | 0            | 0 | 0            | 0 | -0.024899895 |
| 0 | 0           | 0 | 0.042203303 | 0 | -0.039361596 | 0 | 0            | 0 | -0.016719475 |
| 0 | 0           | 0 | 0           | 0 | 0            | 0 | 0            | 0 | 0            |
| 0 | 0           | 0 | 0.041033995 | 0 | -0.036772757 | 0 | 0            | 0 | -0.016690429 |
| 0 | 0           | 0 | 0.0427911   | 0 | -0.039839057 | 0 | 0            | 0 | 0            |
| 0 | 0           | 0 | 0           | 0 | 0            | 0 | 0            | 0 | 0            |
| 0 | 0           | 0 | 0.041623285 | 0 | -0.037254229 | 0 | 0            | 0 | 0            |
| 0 | 0           | 0 | 0.045267704 | 0 | -0.041038844 | 0 | 0            | 0 | 0            |
| 0 | 0           | 0 | 0.009068331 | 0 | 0            | 0 | 0            | 0 | -0.37719175  |
| 0 | 0           | 0 | 0.045830315 | 0 | -0.043208248 | 0 | 0            | 0 | 0            |
| 0 | 0           | 0 | 0.045772667 | 0 | -0.043636373 | 0 | 0.001794719  | 0 | 0            |
| 0 | 0           | 0 | 0.04470001  | 0 | -0.040954371 | 0 | 0            | 0 | 0            |
| 0 | 0           | 0 | 0.044599177 | 0 | -0.041061675 | 0 | 0.00181477   | 0 | 0            |
| 0 | 0           | 0 | 0.007928997 | 0 | 0            | 0 | 0            | 0 | -0.37796376  |
| 0 | 0           | 0 | 0           | 0 | 0            | 0 | 0            | 0 | -0.38117657  |
| 0 | 0           | 0 | 0           | 0 | -0.001659647 | 0 | 0            | 0 | -0.38178658  |
| 0 | 0           | 0 | 0           | 0 | 0            | 0 | 0            | 0 | -0.38176124  |
| 0 | 0           | 0 | 0           | 0 | 0            | 0 | -0.000330407 | 0 | -0.38109626  |
| 0 | 0           | 0 | 0           | 0 | -0.003240396 | 0 | 0            | 0 | -0.3823979   |
| 0 | 0           | 0 | 0           | 0 | 0            | 0 | -0.001879951 | 0 | -0.3801905   |
| 0 | 0           | 0 | 0           | 0 | 0            | 0 | 0            | 0 | -0.38155244  |
| 0 | 0           | 0 | 0.019226091 | 0 | 0            | 0 | -0.01590303  | 0 | -0.020508222 |
| 0 | 0           | 0 | 0.019043518 | 0 | 0            | 0 | -0.017232716 | 0 | -0.020712371 |
| 0 | 0           | 0 | 0.019580938 | 0 | 0            | 0 | -0.016196969 | 0 | 0            |
| 0 | 0           | 0 | 0.019400163 | 0 | 0            | 0 | -0.017525284 | 0 | 0            |
| 0 | 0           | 0 | 0.00891713  | 0 | 0            | 0 | 0            | 0 | -0.022497427 |
| 0 | 0           | 0 | 0.012540805 | 0 | 0            | 0 | 0            | 0 | -0.019807345 |
| 0 | 0           | 0 | 0.021177132 | 0 | 0            | 0 | -0.01755659  | 0 | 0            |
| 0 | 0           | 0 | 0.00910089  | 0 | 0            | 0 | 0            | 0 | 0            |
| 0 | 0           | 0 | 0.012107897 | 0 | 0            | 0 | 0            | 0 | -0.019677555 |
| 0 | 0           | 0 | 0.013022668 | 0 | 0            | 0 | 0            | 0 | 0            |
| 0 | 0           | 0 | 0.02192403  | 0 | 0            | 0 | -0.015303014 | 0 | 0            |
| 0 | 0           | 0 | 0.021861076 | 0 | 0            | 0 | -0.016155692 | 0 | 0            |
| 0 | 0           | 0 | 0.012591328 | 0 | 0            | 0 | 0            | 0 | 0            |
| 0 | 0           | 0 | 0           | 0 | -0.002096437 | 0 | 0            | 0 | -0.024334997 |
| 0 | 0           | 0 | 0           | 0 | 0            | 0 | -0.001343608 | 0 | -0.024306998 |
| 0 | 0           | 0 | 0           | 0 | 0            | 0 | 0            | 0 | -0.024628773 |
| 0 | 0           | 0 | 0.015498759 | 0 | 0            | 0 | 0            | 0 | 0            |
| 0 | 0           | 0 | 0           | 0 | -0.004424459 | 0 | 0            | 0 | -0.025561384 |
| 0 | 0           | 0 | 0           | 0 | 0            | 0 | -0.004272071 | 0 | -0.02544807  |
| 0 | 0           | 0 | 0           | 0 | -0.002062982 | 0 | 0            | 0 | 0            |

|   |              |   |             |   |              |              |              |              |
|---|--------------|---|-------------|---|--------------|--------------|--------------|--------------|
| 0 | 0            | 0 | 0           | 0 | 0            | -0.00136875  | 0            | 0            |
| 0 | 0            | 0 | 0           | 0 | 0            | 0            | 0            | 0            |
| 0 | 0            | 0 | 0           | 0 | -0.002052187 | 0            | 0.000816567  | -0.024111757 |
| 0 | 0            | 0 | 0           | 0 | -0.005667582 | 0            | 0            | -0.025583303 |
| 0 | 0            | 0 | 0           | 0 | 0            | -0.005226955 | 0            | -0.025384042 |
| 0 | 0            | 0 | 0           | 0 | -0.003432126 | 0            | 0.000519939  | -0.024317886 |
| 0 | 0            | 0 | 0           | 0 | -0.004047404 | 0            | 0            | 0            |
| 0 | 0            | 0 | 0           | 0 | 0            | -0.003930723 | 0            | 0            |
| 0 | 0            | 0 | 0           | 0 | -0.001906055 | 0            | 0.000658116  | 0            |
| 0 | 0            | 0 | 0           | 0 | -0.005285198 | 0            | 0            | 0            |
| 0 | 0            | 0 | 0           | 0 | 0            | -0.004883708 | 0            | 0            |
| 0 | 0            | 0 | 0           | 0 | -0.003278329 | 0            | 0.000356418  | 0            |
| 0 | 0            | 0 | 0           | 0 | -0.003098257 | 0            | 0.001615384  | 0            |
| 0 | 0            | 0 | 0           | 0 | -0.00194043  | 0            | 0            | 0            |
| 0 | 0            | 0 | 0           | 0 | 0            | -0.000475294 | 0            | 0            |
| 0 | 0            | 0 | 0           | 0 | -0.001840599 | 0            | 0.000933531  | 0            |
| 0 | 0            | 0 | 0           | 0 | -0.003010325 | 0            | 0.000884057  | 0            |
| 0 | -0.066128907 | 0 | 0.011878864 | 0 | 0            | -0.038546944 | 0            | 0            |
| 0 | -0.064281879 | 0 | 0.025227804 | 0 | -0.018522774 | 0            | -0.023847308 | 0            |
| 0 | -0.07198934  | 0 | 0           | 0 | -0.004036791 | 0            | -0.029227931 | 0            |
| 0 | -0.074345604 | 0 | 0.02328222  | 0 | -0.041507853 | 0            | 0            | 0            |
| 0 | 0            | 0 | 0           | 0 | 0            | 0            | 0            | -0.40923159  |
| 0 | 0            | 0 | 0           | 0 | 0.045623211  | 0            | 0            | -0.3952126   |
| 0 | 0            | 0 | 0           | 0 | 0.05276509   | 0            | -0.014732804 | -0.019435963 |
| 0 | 0            | 0 | 0           | 0 | 0.052764289  | 0            | -0.014779063 | 0            |
| 0 | 0            | 0 | 0           | 0 | 0.043349438  | 0            | 0            | -0.021234272 |
| 0 | 0            | 0 | 0           | 0 | 0.043532253  | 0            | 0            | 0            |
| 0 | 0            | 0 | 0           | 0 | 0.050903938  | 0            | -0.017231993 | 0            |
| 0 | 0            | 0 | 0           | 0 | 0            | 0            | 0            | -0.41227216  |
| 0 | 0            | 0 | 0           | 0 | 0            | 0.01547983   | 0            | -0.41713159  |
| 0 | -0.043012825 | 0 | 0           | 0 | 0.10963725   | 0            | 0.11378926   | 0            |
| 0 | 0            | 0 | 0           | 0 | 0.14083468   | 0            | 0.11397816   | -0.051701088 |
| 0 | 0            | 0 | 0           | 0 | 0.14056263   | 0            | 0.11330852   | 0            |
| 0 | 0            | 0 | 0           | 0 | 0            | 0.003684185  | 0            | -0.023916322 |
| 0 | 0            | 0 | 0           | 0 | 0            | 0.003941333  | 0            | 0            |
| 0 | 0            | 0 | 0.034076942 | 0 | 0            | -0.050628943 | 0            | -0.34364842  |
| 0 | 0            | 0 | 0           | 0 | 0.12046933   | 0            | 0.11896793   | 0            |
| 0 | 0            | 0 | 0.027581113 | 0 | 0.11181367   | 0            | 0.11099749   | 0            |
| 0 | 0            | 0 | 0           | 0 | 0.12056517   | 0            | 0.11870828   | 0            |
| 0 | 0            | 0 | 0           | 0 | 0.13909455   | 0            | 0.12696396   | -0.52260025  |
| 0 | 0            | 0 | 0.035511074 | 0 | 0            | -0.05082344  | 0            | -0.010387363 |
| 0 | 0            | 0 | 0.037110004 | 0 | -0.003106537 | -0.050928684 | 0            | -0.010669794 |
| 0 | 0            | 0 | 0.035847803 | 0 | 0            | -0.050600254 | 0            | 0            |
| 0 | 0            | 0 | 0.037656569 | 0 | -0.003582795 | -0.050874035 | 0            | 0            |
| 0 | 0            | 0 | 0.039169989 | 0 | -0.004144005 | -0.048524324 | 0            | 0            |
| 0 | 0            | 0 | 0           | 0 | 0.13703156   | 0            | 0.11343559   | 0            |
| 0 | -0.032221095 | 0 | 0           | 0 | 0.098561888  | 0            | 0.1268752    | 0            |

|   |              |   |             |   |              |   |              |   |              |
|---|--------------|---|-------------|---|--------------|---|--------------|---|--------------|
| 0 | -0.032021395 | 0 | 0           | 0 | 0.098665441  | 0 | 0.12659424   | 0 | 0            |
| 0 | 0            | 0 | 0           | 0 | 0.027188847  | 0 | -0.048871125 | 0 | -0.35290705  |
| 0 | 0            | 0 | 0           | 0 | 0.12101085   | 0 | 0.12732309   | 0 | -0.03453512  |
| 0 | 0            | 0 | 0           | 0 | 0.12070944   | 0 | 0.12713877   | 0 | -0.034592704 |
| 0 | -0.029601932 | 0 | 0.020438499 | 0 | 0.099901103  | 0 | 0.11891442   | 0 | 0            |
| 0 | 0            | 0 | 0           | 0 | 0.12084571   | 0 | 0.12670801   | 0 | 0            |
| 0 | 0            | 0 | 0           | 0 | 0.12055307   | 0 | 0.12652135   | 0 | 0            |
| 0 | -0.054243564 | 0 | 0.059693974 | 0 | 0            | 0 | 0.10869207   | 0 | 0            |
| 0 | 0            | 0 | 0.02904694  | 0 | 0.091430607  | 0 | 0.12353772   | 0 | 0            |
| 0 | 0            | 0 | 0.029465956 | 0 | 0.09054043   | 0 | 0.12337865   | 0 | 0            |
| 0 | -0.027454257 | 0 | 0           | 0 | 0.12028925   | 0 | 0.12070235   | 0 | -0.006763161 |
| 0 | -0.033673067 | 0 | 0           | 0 | 0.11561223   | 0 | 0.12054867   | 0 | 0            |
| 0 | -0.031933242 | 0 | 0           | 0 | 0.11690059   | 0 | 0.12053475   | 0 | 0            |
| 0 | 0            | 0 | 0           | 0 | 0.029402735  | 0 | -0.050078939 | 0 | -0.016970414 |
| 0 | 0            | 0 | 0.019576416 | 0 | 0.12168236   | 0 | 0.11908445   | 0 | -0.029500907 |
| 0 | 0            | 0 | 0           | 0 | 0.029558086  | 0 | -0.04978449  | 0 | 0            |
| 0 | 0            | 0 | 0           | 0 | 0            | 0 | -0.029773084 | 0 | -0.37653535  |
| 0 | 0            | 0 | 0.020452055 | 0 | 0.12061649   | 0 | 0.11849351   | 0 | 0            |
| 0 | 0            | 0 | 0           | 0 | 0.13975017   | 0 | 0.12081612   | 0 | -0.03322638  |
| 0 | 0            | 0 | 0.044872898 | 0 | 0.097681188  | 0 | 0.11731469   | 0 | 0            |
| 0 | -0.065311597 | 0 | 0           | 0 | 0            | 0 | 0.12615762   | 0 | 0            |
| 0 | -0.064752759 | 0 | 0           | 0 | 0            | 0 | 0.12582654   | 0 | 0            |
| 0 | 0            | 0 | 0           | 0 | 0.13949264   | 0 | 0.12025385   | 0 | 0            |
| 0 | 0            | 0 | 0           | 0 | 0.11877683   | 0 | 0.1252694    | 0 | 0            |
| 0 | 0            | 0 | 0           | 0 | 0.11918612   | 0 | 0.1252239    | 0 | 0            |
| 0 | 0            | 0 | 0           | 0 | 0.11893299   | 0 | 0.12500638   | 0 | 0            |
| 0 | 0            | 0 | 0.10946939  | 0 | 0            | 0 | 0.10750498   | 0 | 0            |
| 0 | 0            | 0 | 0.068483168 | 0 | 0            | 0 | 0.11902798   | 0 | 0            |
| 0 | -0.037730575 | 0 | 0.052821717 | 0 | 0            | 0 | 0.12727453   | 0 | 0            |
| 0 | 0            | 0 | 0.06856671  | 0 | 0            | 0 | 0.11912341   | 0 | 0            |
| 0 | -0.038341451 | 0 | 0.052608381 | 0 | 0            | 0 | 0.1275049    | 0 | 0            |
| 0 | 0            | 0 | 0.015790386 | 0 | 0            | 0 | 0            | 0 | -0.38330117  |
| 0 | 0            | 0 | 0.037125112 | 0 | -0.043265703 | 0 | 0            | 0 | -0.39510872  |
| 0 | 0            | 0 | 0.088680058 | 0 | 0            | 0 | 0.12516152   | 0 | 0            |
| 0 | 0            | 0 | 0.089104857 | 0 | 0            | 0 | 0.1253319    | 0 | 0            |
| 0 | 0            | 0 | 0.037227718 | 0 | -0.029435398 | 0 | 0            | 0 | -0.00237887  |
| 0 | 0            | 0 | 0.037837425 | 0 | -0.029637511 | 0 | 0            | 0 | 0            |
| 0 | 0            | 0 | 0           | 0 | 0.00227637   | 0 | 0            | 0 | -0.3921983   |
| 0 | -0.033820085 | 0 | 0.086467542 | 0 | 0            | 0 | 0.11656108   | 0 | 0            |
| 0 | -0.073962232 | 0 | 0.055230264 | 0 | 0            | 0 | 0.11588595   | 0 | 0            |
| 0 | 0            | 0 | 0.064884219 | 0 | 0            | 0 | 0.12704191   | 0 | -0.020673152 |
| 0 | 0            | 0 | 0.065079198 | 0 | 0            | 0 | 0.12711241   | 0 | -0.020401698 |
| 0 | 0            | 0 | 0.065305931 | 0 | 0            | 0 | 0.12653465   | 0 | 0            |
| 0 | 0            | 0 | 0           | 0 | 0.13940896   | 0 | 0            | 0 | -0.42767852  |
| 0 | 0            | 0 | 0.065498256 | 0 | 0            | 0 | 0.1266098    | 0 | 0            |
| 0 | -0.070525918 | 0 | 0.056192651 | 0 | 0            | 0 | 0.11525583   | 0 | 0.047972323  |
| 0 | -0.10406652  | 0 | 0           | 0 | 0            | 0 | 0.11371705   | 0 | 0            |

|   |              |   |             |   |             |   |            |   |              |
|---|--------------|---|-------------|---|-------------|---|------------|---|--------------|
| 0 | 0            | 0 | 0.067017803 | 0 | 0           | 0 | 0.12561809 | 0 | 0            |
| 0 | -0.082602517 | 0 | 0           | 0 | 0           | 0 | 0.13187668 | 0 | 0            |
| 0 | -0.039377451 | 0 | 0.025835838 | 0 | 0.087723745 | 0 | 0          | 0 | 0            |
| 0 | -0.0815919   | 0 | 0           | 0 | 0           | 0 | 0.13155926 | 0 | 0            |
| 0 | -0.10110316  | 0 | 0           | 0 | 0           | 0 | 0.1130187  | 0 | 0.050953128  |
| 0 | 0            | 0 | 0.023225108 | 0 | 0.11852889  | 0 | 0          | 0 | -0.046024003 |
| 0 | -0.07911456  | 0 | 0           | 0 | 0           | 0 | 0.13165032 | 0 | 0.044042205  |
| 0 | 0            | 0 | 0.079425143 | 0 | 0           | 0 | 0.10663836 | 0 | -0.031050699 |
| 0 | -0.026158642 | 0 | 0           | 0 | 0.12142733  | 0 | 0          | 0 | -0.025374497 |
| 0 | -0.078031605 | 0 | 0           | 0 | 0           | 0 | 0.13135871 | 0 | 0.042890983  |
| 0 | -0.042301457 | 0 | 0           | 0 | 0.10182802  | 0 | 0          | 0 | 0            |
| 0 | -0.042206654 | 0 | 0           | 0 | 0.10246685  | 0 | 0          | 0 | 0            |
| 0 | -0.031290414 | 0 | 0           | 0 | 0.11758111  | 0 | 0          | 0 | 0            |
| 0 | 0            | 0 | 0.079790929 | 0 | 0           | 0 | 0.10620871 | 0 | 0            |
| 0 | 0            | 0 | 0.023974886 | 0 | 0.11763814  | 0 | 0          | 0 | 0            |
| 0 | 0            | 0 | 0           | 0 | 0.13169896  | 0 | 0          | 0 | -0.051067295 |
| 0 | 0            | 0 | 0           | 0 | 0.13192357  | 0 | 0          | 0 | -0.051044192 |
| 0 | -0.042276721 | 0 | 0           | 0 | 0.10930074  | 0 | 0          | 0 | 0            |
| 0 | 0            | 0 | 0           | 0 | 0.14005848  | 0 | 0          | 0 | -0.050724486 |
| 0 | 0            | 0 | 0.10473447  | 0 | 0           | 0 | 0.11474286 | 0 | -0.009338756 |
| 0 | 0            | 0 | 0           | 0 | 0.13149991  | 0 | 0          | 0 | 0            |
| 0 | 0            | 0 | 0           | 0 | 0.1317245   | 0 | 0          | 0 | 0            |
| 0 | 0            | 0 | 0.10518167  | 0 | 0           | 0 | 0.11448021 | 0 | 0            |
| 0 | 0            | 0 | 0           | 0 | 0.13985851  | 0 | 0          | 0 | 0            |
| 0 | -0.054462254 | 0 | 0           | 0 | 0           | 0 | 0.13450934 | 0 | 0            |
| 0 | -0.05451926  | 0 | 0           | 0 | 0           | 0 | 0.13366748 | 0 | 0            |
| 0 | -0.055129008 | 0 | 0           | 0 | 0           | 0 | 0.1340094  | 0 | 0            |
| 0 | 0            | 0 | 0.058099978 | 0 | 0.085015405 | 0 | 0          | 0 | 0            |
| 0 | -0.042541025 | 0 | 0.087605134 | 0 | 0           | 0 | 0          | 0 | 0            |
| 0 | -0.076043143 | 0 | 0           | 0 | 0           | 0 | 0.11316409 | 0 | 0            |
| 0 | 0            | 0 | 0.079584496 | 0 | 0           | 0 | 0.11923063 | 0 | -0.50393191  |
| 0 | 0            | 0 | 0.0346031   | 0 | 0.095332836 | 0 | 0          | 0 | 0            |
| 0 | 0            | 0 | 0.034766764 | 0 | 0.095110005 | 0 | 0          | 0 | 0            |
| 0 | -0.10043844  | 0 | 0           | 0 | 0           | 0 | 0.1258375  | 0 | -0.4233636   |
| 0 | -0.048288264 | 0 | 0.05647977  | 0 | 0           | 0 | 0          | 0 | 0            |
| 0 | -0.047842892 | 0 | 0.056690647 | 0 | 0           | 0 | 0          | 0 | 0            |
| 0 | 0            | 0 | 0           | 0 | 0           | 0 | 0.12948005 | 0 | -0.047573551 |
| 0 | 0            | 0 | 0           | 0 | 0           | 0 | 0.12967564 | 0 | -0.047502693 |
| 0 | 0            | 0 | 0           | 0 | 0           | 0 | 0.12882367 | 0 | 0            |
| 0 | 0            | 0 | 0           | 0 | 0           | 0 | 0.1290198  | 0 | 0            |
| 0 | -0.071213883 | 0 | 0.058232951 | 0 | 0           | 0 | 0          | 0 | 0            |
| 0 | 0            | 0 | 0.10023423  | 0 | 0           | 0 | 0          | 0 | 0            |
| 0 | 0            | 0 | 0.10048138  | 0 | 0           | 0 | 0          | 0 | 0            |
| 0 | -0.068464872 | 0 | 0.058968548 | 0 | 0           | 0 | 0          | 0 | 0.029965958  |
| 0 | 0            | 0 | 0           | 0 | 0.12868776  | 0 | 0          | 0 | 0            |
| 0 | 0            | 0 | 0           | 0 | 0.12864678  | 0 | 0          | 0 | 0            |
| 0 | 0            | 0 | 0           | 0 | 0.12894281  | 0 | 0          | 0 | 0            |

|   |              |   |             |   |             |            |   |              |
|---|--------------|---|-------------|---|-------------|------------|---|--------------|
| 0 | -0.10408296  | 0 | 0           | 0 | 0           | 0.12001252 | 0 | 0            |
| 0 | 0            | 0 | 0.10856959  | 0 | 0           | 0          | 0 | -0.026594337 |
| 0 | 0            | 0 | 0.10893593  | 0 | 0           | 0          | 0 | 0            |
| 0 | 0            | 0 | 0           | 0 | 0           | 0.14233024 | 0 | -0.52904239  |
| 0 | -0.10127917  | 0 | 0           | 0 | 0           | 0.11919616 | 0 | 0.068721261  |
| 0 | 0            | 0 | 0           | 0 | 0           | 0.14252949 | 0 | -0.52886527  |
| 0 | 0            | 0 | 0.026243153 | 0 | 0.11396023  | 0          | 0 | -0.39116518  |
| 0 | -0.027021431 | 0 | 0           | 0 | 0.11900276  | 0          | 0 | -0.36869569  |
| 0 | -0.02662528  | 0 | 0.028470839 | 0 | 0.083246339 | 0          | 0 | 0            |
| 0 | -0.026487013 | 0 | 0.028710515 | 0 | 0.082883931 | 0          | 0 | 0            |
| 0 | -0.024225091 | 0 | 0.040391518 | 0 | 0.085288276 | 0          | 0 | 0            |
| 0 | 0            | 0 | 0           | 0 | 0.12916317  | 0          | 0 | -0.39349865  |
| 0 | 0            | 0 | 0           | 0 | 0.12897773  | 0          | 0 | -0.3936243   |
| 0 | 0            | 0 | 0.070995236 | 0 | 0           | 0          | 0 | -0.034413864 |
| 0 | 0            | 0 | 0.071150181 | 0 | 0           | 0          | 0 | -0.034321228 |
| 0 | 0            | 0 | 0           | 0 | 0           | 0.12854794 | 0 | 0            |
| 0 | -0.03297294  | 0 | 0.027674415 | 0 | 0.089621369 | 0          | 0 | 0            |
| 0 | -0.028347379 | 0 | 0.026980177 | 0 | 0.093745824 | 0          | 0 | 0.002542417  |
| 0 | 0            | 0 | 0           | 0 | 0.13797192  | 0          | 0 | -0.3969002   |
| 0 | 0            | 0 | 0.071331376 | 0 | 0           | 0          | 0 | 0            |
| 0 | 0            | 0 | 0           | 0 | 0           | 0.12808368 | 0 | 0            |
| 0 | 0            | 0 | 0.071485864 | 0 | 0           | 0          | 0 | 0            |
| 0 | 0            | 0 | 0           | 0 | 0           | 0.12831312 | 0 | 0            |
| 0 | 0            | 0 | 0.028284879 | 0 | 0.10136802  | 0          | 0 | -0.025237535 |
| 0 | 0            | 0 | 0.028026733 | 0 | 0.10205093  | 0          | 0 | -0.025233795 |
| 0 | 0            | 0 | 0.041656663 | 0 | 0.10122336  | 0          | 0 | -0.021662912 |
| 0 | 0            | 0 | 0.028925402 | 0 | 0.10059391  | 0          | 0 | 0            |
| 0 | 0            | 0 | 0.028667288 | 0 | 0.10127621  | 0          | 0 | 0            |
| 0 | 0            | 0 | 0.042813906 | 0 | 0.099995792 | 0          | 0 | 0            |
| 0 | 0            | 0 | 0.051742278 | 0 | 0.079745952 | 0          | 0 | 0            |
| 0 | 0            | 0 | 0.05161428  | 0 | 0.080211447 | 0          | 0 | 0            |
| 0 | -0.030026374 | 0 | 0           | 0 | 0.10796095  | 0          | 0 | 0            |
| 0 | -0.02993683  | 0 | 0           | 0 | 0.1080111   | 0          | 0 | 0            |
| 0 | -0.026671311 | 0 | 0           | 0 | 0.11080248  | 0          | 0 | -0.004699458 |
| 0 | -0.031345857 | 0 | 0           | 0 | 0.10742265  | 0          | 0 | 0            |
| 0 | -0.029757909 | 0 | 0           | 0 | 0.10852168  | 0          | 0 | 0            |
| 0 | -0.026371805 | 0 | 0           | 0 | 0.11103699  | 0          | 0 | -0.005008171 |
| 0 | -0.031062466 | 0 | 0           | 0 | 0.10769066  | 0          | 0 | 0            |
| 0 | -0.032510064 | 0 | 0           | 0 | 0.11520871  | 0          | 0 | 0            |
| 0 | -0.02779509  | 0 | 0           | 0 | 0.11876391  | 0          | 0 | -0.003158798 |
| 0 | 0            | 0 | 0.033740388 | 0 | 0.094652426 | 0          | 0 | 0            |
| 0 | 0            | 0 | 0           | 0 | 0.12893798  | 0          | 0 | -0.030518809 |
| 0 | 0            | 0 | 0           | 0 | 0.1286925   | 0          | 0 | -0.030558779 |
| 0 | 0            | 0 | 0           | 0 | 0.1289716   | 0          | 0 | -0.030475305 |
| 0 | -0.087114207 | 0 | 0           | 0 | 0           | 0          | 0 | 0            |
| 0 | 0            | 0 | 0.074388695 | 0 | 0           | 0          | 0 | 0            |
| 0 | 0            | 0 | 0           | 0 | 0.12878792  | 0          | 0 | 0            |



|   |              |   |             |   |            |   |            |   |              |
|---|--------------|---|-------------|---|------------|---|------------|---|--------------|
| 0 | 0            | 0 | 0           | 0 | 0.12854972 | 0 | 0          | 0 | 0            |
| 0 | 0            | 0 | 0           | 0 | 0.12882205 | 0 | 0          | 0 | 0            |
| 0 | -0.086545063 | 0 | 0           | 0 | 0          | 0 | 0          | 0 | 0            |
| 0 | 0            | 0 | 0           | 0 | 0          | 0 | 0.13640699 | 0 | -0.030883711 |
| 0 | 0            | 0 | 0           | 0 | 0          | 0 | 0.13570158 | 0 | -0.031046927 |
| 0 | -0.084446364 | 0 | 0           | 0 | 0          | 0 | 0          | 0 | 0.033801579  |
| 0 | 0            | 0 | 0.081791392 | 0 | 0          | 0 | 0          | 0 | -0.4141813   |
| 0 | -0.028438088 | 0 | 0.079551874 | 0 | 0          | 0 | 0          | 0 | 0            |
| 0 | -0.028748575 | 0 | 0.079706348 | 0 | 0          | 0 | 0          | 0 | 0            |
| 0 | 0            | 0 | 0           | 0 | 0          | 0 | 0.13593986 | 0 | -0.030719919 |
| 0 | -0.083825431 | 0 | 0           | 0 | 0          | 0 | 0          | 0 | 0.033241598  |
| 0 | 0            | 0 | 0           | 0 | 0          | 0 | 0.1358229  | 0 | 0            |
| 0 | 0            | 0 | 0           | 0 | 0          | 0 | 0.13511903 | 0 | 0            |
| 0 | -0.059130678 | 0 | 0.055302878 | 0 | 0          | 0 | 0          | 0 | 0            |
| 0 | 0            | 0 | 0           | 0 | 0          | 0 | 0.1353624  | 0 | 0            |
| 0 | -0.060035026 | 0 | 0.055068279 | 0 | 0          | 0 | 0          | 0 | 0            |
| 0 | -0.05785818  | 0 | 0.079905718 | 0 | 0          | 0 | 0          | 0 | 0            |
| 0 | -0.056242758 | 0 | 0.055879283 | 0 | 0          | 0 | 0          | 0 | 0.03539308   |
| 0 | -0.057200107 | 0 | 0.055643571 | 0 | 0          | 0 | 0          | 0 | 0.036372918  |
| 0 | -0.066741167 | 0 | 0           | 0 | 0          | 0 | 0          | 0 | 0            |
| 0 | -0.066393714 | 0 | 0           | 0 | 0          | 0 | 0          | 0 | 0            |
| 0 | -0.055082856 | 0 | 0.080976823 | 0 | 0          | 0 | 0          | 0 | 0.040926522  |
| 0 | -0.066276045 | 0 | 0           | 0 | 0          | 0 | 0          | 0 | 0            |
| 0 | 0            | 0 | 0           | 0 | 0.12701208 | 0 | 0          | 0 | 0            |
| 0 | -0.067258479 | 0 | 0.060070885 | 0 | 0          | 0 | 0          | 0 | -0.31745045  |
| 0 | -0.099913072 | 0 | 0           | 0 | 0          | 0 | 0          | 0 | -0.32916669  |
| 0 | 0            | 0 | 0           | 0 | 0          | 0 | 0.13405208 | 0 | 0            |
| 0 | -0.035493511 | 0 | 0.059825662 | 0 | 0          | 0 | 0          | 0 | 0            |
| 0 | 0            | 0 | 0.093287309 | 0 | 0          | 0 | 0          | 0 | -0.01085277  |
| 0 | 0            | 0 | 0.09373349  | 0 | 0          | 0 | 0          | 0 | 0            |
| 0 | 0            | 0 | 0.093793587 | 0 | 0          | 0 | 0          | 0 | -0.010599754 |
| 0 | 0            | 0 | 0.094232092 | 0 | 0          | 0 | 0          | 0 | 0            |
| 0 | 0            | 0 | 0.09499829  | 0 | 0          | 0 | 0          | 0 | 0            |
| 0 | -0.10279704  | 0 | 0           | 0 | 0          | 0 | 0          | 0 | 0            |
| 0 | 0            | 0 | 0.10630147  | 0 | 0          | 0 | 0          | 0 | -0.37370294  |
| 0 | 0            | 0 | 0.071580525 | 0 | 0          | 0 | 0          | 0 | -0.37606149  |
| 0 | -0.10058795  | 0 | 0           | 0 | 0          | 0 | 0          | 0 | 0.051438858  |
| 0 | 0            | 0 | 0.071853779 | 0 | 0          | 0 | 0          | 0 | -0.37596407  |
| 0 | -0.040582847 | 0 | 0.057715602 | 0 | 0          | 0 | 0          | 0 | 0            |
| 0 | -0.040165136 | 0 | 0.057815112 | 0 | 0          | 0 | 0          | 0 | 0            |
| 0 | -0.060450665 | 0 | 0.056182059 | 0 | 0          | 0 | 0          | 0 | 0            |
| 0 | -0.060158004 | 0 | 0.056153818 | 0 | 0          | 0 | 0          | 0 | 0            |
| 0 | -0.057616433 | 0 | 0.056927599 | 0 | 0          | 0 | 0          | 0 | 0.039447139  |
| 0 | 0            | 0 | 0           | 0 | 0          | 0 | 0.11860751 | 0 | -0.5532704   |
| 0 | -0.057285227 | 0 | 0.056888732 | 0 | 0          | 0 | 0          | 0 | 0.039136054  |
| 0 | 0            | 0 | 0.07163464  | 0 | 0          | 0 | 0          | 0 | -0.015239254 |
| 0 | -0.036045816 | 0 | 0.056394792 | 0 | 0          | 0 | 0.02256769 | 0 | 0            |

|   |              |   |             |   |              |   |             |              |
|---|--------------|---|-------------|---|--------------|---|-------------|--------------|
| 0 | 0            | 0 | 0.071933422 | 0 | 0            | 0 | 0           | 0            |
| 0 | -0.033910296 | 0 | 0.079083084 | 0 | -0.022352557 | 0 | 0           | 0            |
| 0 | -0.035682955 | 0 | 0.056635579 | 0 | 0            | 0 | 0.021043792 | 0            |
| 0 | -0.033631017 | 0 | 0.079805776 | 0 | -0.023844287 | 0 | 0           | 0            |
| 0 | 0            | 0 | 0.10794518  | 0 | -0.052821711 | 0 | 0.044718556 | 0            |
| 0 | 0            | 0 | 0.10853556  | 0 | -0.054518781 | 0 | 0.044160167 | 0            |
| 0 | 0            | 0 | 0.1077525   | 0 | -0.04045298  | 0 | 0           | 0            |
| 0 | -0.033896849 | 0 | 0.062692491 | 0 | 0            | 0 | 0           | 0            |
| 0 | -0.083682903 | 0 | 0           | 0 | 0            | 0 | 0           | -0.30588156  |
| 0 | 0            | 0 | 0.10821098  | 0 | -0.041837496 | 0 | 0           | 0            |
| 0 | -0.082840188 | 0 | 0           | 0 | 0            | 0 | 0           | -0.30710015  |
| 0 | -0.078696242 | 0 | 0.08365858  | 0 | -0.030864461 | 0 | 0           | 0            |
| 0 | -0.077012243 | 0 | 0.059712784 | 0 | 0            | 0 | 0           | 0            |
| 0 | -0.07127967  | 0 | 0.063091605 | 0 | 0            | 0 | 0           | -0.30359255  |
| 0 | -0.087502132 | 0 | 0           | 0 | 0            | 0 | 0.035032562 | 0            |
| 0 | -0.088544359 | 0 | 0           | 0 | 0            | 0 | 0           | 0            |
| 0 | -0.076185183 | 0 | 0.084031422 | 0 | -0.030141859 | 0 | 0           | 0.064812964  |
| 0 | -0.086612561 | 0 | 0           | 0 | 0            | 0 | 0           | 0            |
| 0 | -0.085774423 | 0 | 0           | 0 | 0            | 0 | 0           | 0            |
| 0 | -0.074521287 | 0 | 0.060576159 | 0 | 0            | 0 | 0           | 0.052955223  |
| 0 | 0            | 0 | 0.078420906 | 0 | 0            | 0 | 0           | -0.36288721  |
| 0 | -0.087057459 | 0 | 0           | 0 | 0            | 0 | 0.03343794  | 0            |
| 0 | -0.085748232 | 0 | 0           | 0 | 0            | 0 | 0           | 0            |
| 0 | -0.084894153 | 0 | 0           | 0 | 0            | 0 | 0.034756848 | 0.055009359  |
| 0 | 0            | 0 | 0.07791036  | 0 | 0            | 0 | 0           | -0.36337341  |
| 0 | -0.08817546  | 0 | 0           | 0 | 0            | 0 | 0           | 0            |
| 0 | 0            | 0 | 0.076125671 | 0 | 0            | 0 | 0           | -0.018102396 |
| 0 | -0.086091816 | 0 | 0           | 0 | 0            | 0 | 0           | 0.047306824  |
| 0 | -0.08418246  | 0 | 0           | 0 | 0            | 0 | 0           | 0.053066234  |
| 0 | -0.047437842 | 0 | 0.098059756 | 0 | -0.040866053 | 0 | 0           | 0            |
| 0 | -0.083278779 | 0 | 0           | 0 | 0            | 0 | 0           | 0.052083666  |
| 0 | -0.076618225 | 0 | 0.059764534 | 0 | 0            | 0 | 0.010949849 | 0            |
| 0 | 0            | 0 | 0.076637779 | 0 | 0            | 0 | 0           | 0            |
| 0 | 0            | 0 | 0.075832294 | 0 | 0            | 0 | 0           | -0.017880634 |
| 0 | -0.08327753  | 0 | 0           | 0 | 0            | 0 | 0           | 0.052378703  |
| 0 | -0.084406144 | 0 | 0           | 0 | 0            | 0 | 0.033156142 | 0.054557721  |
| 0 | 0            | 0 | 0.07687559  | 0 | 0            | 0 | 0.010790569 | 0            |
| 0 | -0.085679279 | 0 | 0           | 0 | 0            | 0 | 0           | 0.047243624  |
| 0 | 0            | 0 | 0.076348108 | 0 | 0            | 0 | 0           | 0            |
| 0 | 0            | 0 | 0.079008504 | 0 | 0            | 0 | 0           | 0            |
| 0 | 0            | 0 | 0.076819075 | 0 | 0            | 0 | 0.009628565 | 0            |
| 0 | -0.073923203 | 0 | 0.0608476   | 0 | 0            | 0 | 0.010240056 | 0.058830803  |
| 0 | 0            | 0 | 0.074035114 | 0 | 0            | 0 | 0.018874339 | -0.011775766 |
| 0 | 0            | 0 | 0           | 0 | 0            | 0 | 0.11217294  | -0.042007457 |
| 0 | 0            | 0 | 0.094560425 | 0 | -0.02131172  | 0 | 0           | -0.008087609 |
| 0 | 0            | 0 | 0.096809035 | 0 | -0.023356628 | 0 | 0           | 0            |
| 0 | 0            | 0 | 0.09512555  | 0 | -0.02296472  | 0 | 0           | -0.008100804 |

|   |              |   |             |   |              |             |             |              |
|---|--------------|---|-------------|---|--------------|-------------|-------------|--------------|
| 0 | 0            | 0 | 0.074526985 | 0 | 0            | 0.018708776 | 0           | 0            |
| 0 | 0            | 0 | 0.095309868 | 0 | -0.02173861  | 0           | 0           | 0            |
| 0 | -0.085099963 | 0 | 0           | 0 | 0            | 0           | 0           | -0.2994421   |
| 0 | 0            | 0 | 0.095860559 | 0 | -0.023377309 | 0           | 0           | 0            |
| 0 | 0            | 0 | 0.07574554  | 0 | 0            | 0.018281538 | 0           | 0            |
| 0 | 0            | 0 | 0.073893311 | 0 | 0            | 0.017443017 | 0           | -0.01185521  |
| 0 | -0.092626328 | 0 | 0.03780564  | 0 | -0.042967626 | 0           | 0           | 0            |
| 0 | -0.10906659  | 0 | 0           | 0 | -0.040626968 | 0           | 0.039092961 | 0            |
| 0 | -0.059268267 | 0 | 0           | 0 | 0            | 0.022723847 | 0           | 0            |
| 0 | 0            | 0 | 0.074390651 | 0 | 0            | 0.017281045 | 0           | 0            |
| 0 | -0.084483699 | 0 | 0           | 0 | 0            | 0           | 0           | -0.30046629  |
| 0 | -0.092170337 | 0 | 0.038522454 | 0 | -0.044597508 | 0           | 0           | 0            |
| 0 | 0            | 0 | 0           | 0 | 0            | 0.11162854  | 0           | 0            |
| 0 | 0            | 0 | 0.078298331 | 0 | 0            | 0           | 0           | -0.011045241 |
| 0 | -0.10828724  | 0 | 0           | 0 | -0.040934981 | 0           | 0.037821003 | 0            |
| 0 | 0            | 0 | 0           | 0 | 0            | 0           | 0           | -0.42096971  |
| 0 | 0            | 0 | 0.078733739 | 0 | 0            | 0           | 0           | 0            |
| 0 | -0.058778272 | 0 | 0           | 0 | 0            | 0.021365507 | 0           | 0            |
| 0 | -0.090306598 | 0 | 0.037478753 | 0 | -0.042435068 | 0           | 0           | 0.067259301  |
| 0 | 0            | 0 | 0           | 0 | 0            | 0           | 0           | -0.42092252  |
| 0 | -0.10292917  | 0 | 0           | 0 | -0.026296282 | 0           | 0           | 0            |
| 0 | -0.10586397  | 0 | 0           | 0 | -0.039037854 | 0           | 0.037385881 | 0.075097698  |
| 0 | -0.089816409 | 0 | 0.038212272 | 0 | -0.044094759 | 0           | 0           | 0.066849329  |
| 0 | -0.10017263  | 0 | 0           | 0 | 0            | 0           | 0           | -0.29952856  |
| 0 | -0.083663257 | 0 | 0           | 0 | 0.008242525  | 0           | 0           | 0            |
| 0 | -0.059941798 | 0 | 0           | 0 | 0.002927757  | 0           | 0           | 0            |
| 0 | -0.060646388 | 0 | 0           | 0 | 0            | 0           | 0           | 0            |
| 0 | -0.10250785  | 0 | 0           | 0 | -0.026925474 | 0           | 0           | 0            |
| 0 | -0.087390056 | 0 | 0           | 0 | 0            | 0           | 0           | 0            |
| 0 | -0.091690075 | 0 | 0           | 0 | -0.010518559 | 0           | 0           | -0.29214146  |
| 0 | -0.10506191  | 0 | 0           | 0 | -0.039366808 | 0           | 0.036133631 | 0.074279899  |
| 0 | -0.044194394 | 0 | 0.071168808 | 0 | 0            | -0.0065203  | 0           | 0            |
| 0 | -0.083623673 | 0 | 0           | 0 | 0.007315846  | 0           | 0           | 0            |
| 0 | -0.10048407  | 0 | 0           | 0 | -0.025975576 | 0           | 0           | 0.062804556  |
| 0 | -0.09144603  | 0 | 0           | 0 | -0.01155852  | 0           | 0           | -0.29294914  |
| 0 | -0.0596411   | 0 | 0           | 0 | 0.002103222  | 0           | 0           | 0            |
| 0 | -0.0808434   | 0 | 0           | 0 | 0.009101886  | 0           | 0           | 0.051305359  |
| 0 | -0.054575388 | 0 | 0           | 0 | 0            | 0           | 0           | 0            |
| 0 | -0.084974958 | 0 | 0           | 0 | 0            | 0           | 0           | 0.055147812  |
| 0 | -0.10002351  | 0 | 0           | 0 | -0.026615177 | 0           | 0           | 0.062577961  |
| 0 | -0.088314467 | 0 | 0           | 0 | 0            | 0           | 0           | -0.29391328  |
| 0 | -0.054447391 | 0 | 0           | 0 | 0            | 0.034910292 | 0           | 0            |
| 0 | -0.055479745 | 0 | 0           | 0 | -0.003364184 | 0           | 0.037238059 | 0            |
| 0 | -0.080778496 | 0 | 0           | 0 | 0.008153847  | 0           | 0           | 0.051228226  |
| 0 | -0.040773821 | 0 | 0.094270602 | 0 | -0.033166575 | 0           | 0.020370384 | 0            |
| 0 | -0.087949856 | 0 | 0           | 0 | 0            | 0.002184868 | 0           | -0.29452336  |
| 0 | -0.087527518 | 0 | 0           | 0 | 0            | 0           | 0           | -0.29339341  |

|   |              |   |              |   |              |   |              |              |
|---|--------------|---|--------------|---|--------------|---|--------------|--------------|
| 0 | -0.087435538 | 0 | 0.000893022  | 0 | 0            | 0 | 0            | -0.29310127  |
| 0 | -0.055209716 | 0 | 0            | 0 | -0.004161638 | 0 | 0.036019645  | 0            |
| 0 | -0.087720761 | 0 | 0            | 0 | 0            | 0 | 0            | -0.29453874  |
| 0 | -0.087351929 | 0 | 0            | 0 | 0            | 0 | 0.000694     | -0.29446298  |
| 0 | -0.087260601 | 0 | 7.23E-05     | 0 | 0            | 0 | 0            | -0.29402208  |
| 0 | -0.093861009 | 0 | 0            | 0 | -0.010714738 | 0 | 0            | 0            |
| 0 | 0            | 0 | 0            | 0 | 0            | 0 | 0            | -0.045683919 |
| 0 | 0            | 0 | 0            | 0 | 0            | 0 | 0            | -0.04562219  |
| 0 | 0            | 0 | 0            | 0 | 0            | 0 | 0            | -0.045542882 |
| 0 | 0            | 0 | 0            | 0 | 0            | 0 | 0.12495083   | -0.53295923  |
| 0 | 0            | 0 | 0            | 0 | 0            | 0 | 0            | 0            |
| 0 | -0.090760251 | 0 | 0            | 0 | 0            | 0 | -0.003134178 | 0            |
| 0 | -0.091897705 | 0 | -0.002514826 | 0 | 0            | 0 | 0            | 0            |
| 0 | 0            | 0 | 0            | 0 | 0            | 0 | 0            | 0            |
| 0 | -0.091435587 | 0 | 0            | 0 | -0.010471488 | 0 | 0            | 0.061490716  |
| 0 | -0.09066442  | 0 | 0            | 0 | 0            | 0 | 0            | 0            |
| 0 | -0.090224478 | 0 | 0            | 0 | 0            | 0 | 0.001646258  | 0            |
| 0 | -0.090540948 | 0 | -0.000310435 | 0 | 0            | 0 | 0.001935266  | 0            |
| 0 | -0.10692554  | 0 | 0            | 0 | 0            | 0 | 0            | -0.29806422  |
| 0 | -0.0897285   | 0 | 0.000924245  | 0 | 0            | 0 | 0            | 0            |
| 0 | 0            | 0 | 0            | 0 | 0            | 0 | 0            | 0            |
| 0 | -0.090196216 | 0 | 0            | 0 | 0            | 0 | -0.004226866 | 0            |
| 0 | -0.091406714 | 0 | -0.002668421 | 0 | 0            | 0 | 0            | 0            |
| 0 | -0.061377263 | 0 | 0.031893793  | 0 | -0.049344176 | 0 | 0            | 0            |
| 0 | -0.088471234 | 0 | 0            | 0 | 0            | 0 | -0.003718868 | 0.05684158   |
| 0 | -0.089564293 | 0 | -0.002438096 | 0 | 0            | 0 | 0            | 0.057724754  |
| 0 | -0.089836694 | 0 | -8.12E-07    | 0 | 0            | 0 | 0.000209211  | 0            |
| 0 | -0.088328524 | 0 | 0            | 0 | 0            | 0 | 0            | 0.057487739  |
| 0 | -0.087847602 | 0 | 0            | 0 | 0            | 0 | 0.001431048  | 0.058403784  |
| 0 | -0.087339194 | 0 | 0.001045018  | 0 | 0            | 0 | 0            | 0.058110072  |
| 0 | -0.087975931 | 0 | 0.000230885  | 0 | 0            | 0 | 0.001301415  | 0.058599095  |
| 0 | -0.060655527 | 0 | 0.032969425  | 0 | -0.051109127 | 0 | 0            | 0            |
| 0 | -0.050464568 | 0 | 0            | 0 | 0.017525084  | 0 | 0            | 0            |
| 0 | -0.1073647   | 0 | 0            | 0 | 0            | 0 | 0.023140497  | -0.30759085  |
| 0 | -0.087868612 | 0 | 0            | 0 | 0            | 0 | -0.004807996 | 0.05644281   |
| 0 | -0.089028528 | 0 | -0.002591998 | 0 | 0            | 0 | 0            | 0.05757169   |
| 0 | -0.11016335  | 0 | 0            | 0 | 0            | 0 | 0.011610182  | 0            |
| 0 | -0.087234006 | 0 | 0.000536445  | 0 | 0            | 0 | -0.000419869 | 0.057945288  |
| 0 | -0.057353281 | 0 | 0.031529795  | 0 | -0.049951928 | 0 | 0.021302411  | 0            |
| 0 | -0.10914756  | 0 | 0            | 0 | 0.000283646  | 0 | 0            | 0            |
| 0 | -0.056730934 | 0 | 0.032702088  | 0 | -0.051936927 | 0 | 0.020687451  | 0            |
| 0 | 0            | 0 | 0.093125208  | 0 | 0            | 0 | 0            | -0.37717506  |
| 0 | -0.053032226 | 0 | 0.032543028  | 0 | -0.035277052 | 0 | 0            | 0            |
| 0 | -0.066743773 | 0 | 0            | 0 | -0.031116925 | 0 | 0.014486003  | 0            |
| 0 | 0            | 0 | 0.10920121   | 0 | -0.019783109 | 0 | 0            | -0.3680362   |
| 0 | -0.10813301  | 0 | 0            | 0 | 0            | 0 | 0.010715048  | 0.074518518  |
| 0 | -0.098817051 | 0 | 0            | 0 | 0.012179683  | 0 | 0            | -0.29390405  |

|   |              |   |              |   |              |   |              |              |
|---|--------------|---|--------------|---|--------------|---|--------------|--------------|
| 0 | 0            | 0 | 0.1180555    | 0 | -0.033459436 | 0 | 0            | -0.006997966 |
| 0 | -0.064897919 | 0 | 0            | 0 | -0.022558847 | 0 | 0            | 0            |
| 0 | -0.10671535  | 0 | 0            | 0 | 0.001225304  | 0 | 0            | 0.071903975  |
| 0 | 0            | 0 | 0.12059398   | 0 | -0.036601351 | 0 | 0.004942346  | 0            |
| 0 | 0            | 0 | 0.11858989   | 0 | -0.033652414 | 0 | 0            | 0            |
| 0 | -0.06610719  | 0 | 0            | 0 | -0.031607855 | 0 | 0.01384712   | 0            |
| 0 | -0.11106064  | 0 | 0            | 0 | -0.002346159 | 0 | 0.02310607   | 0            |
| 0 | 0            | 0 | 0.093999891  | 0 | 0            | 0 | 0.002282082  | -0.37200977  |
| 0 | -0.060975797 | 0 | 0            | 0 | -0.02441602  | 0 | 0.022425587  | 0            |
| 0 | -0.10784671  | 0 | 0            | 0 | -0.000318192 | 0 | 0.02130913   | 0.080809213  |
| 0 | 0            | 0 | 0            | 0 | 0            | 0 | 0            | 0            |
| 0 | 0            | 0 | 0.094745961  | 0 | 0            | 0 | -0.009341414 | -0.009714471 |
| 0 | -0.11977468  | 0 | 0.034199207  | 0 | -0.047667348 | 0 | 0            | -0.26835283  |
| 0 | 0            | 0 | 0.095105712  | 0 | 0            | 0 | -0.009091313 | 0            |
| 0 | 0            | 0 | 0.11479808   | 0 | -0.028711709 | 0 | 0.012817265  | 0            |
| 0 | 0            | 0 | 0.11400438   | 0 | -0.028061733 | 0 | 0.012525394  | 1.94E-05     |
| 0 | -0.057915361 | 0 | 0            | 0 | 0            | 0 | -0.008144885 | 0            |
| 0 | -0.057542701 | 0 | 0.001956501  | 0 | 0            | 0 | -0.009418765 | 0            |
| 0 | -0.057886842 | 0 | -0.002078264 | 0 | 0            | 0 | 0            | 0            |
| 0 | -0.054320128 | 0 | 0.004197187  | 0 | 0            | 0 | -0.003048802 | 0            |
| 0 | -0.1283807   | 0 | 0.03447545   | 0 | -0.057442898 | 0 | 0            | 0            |
| 0 | -0.056801486 | 0 | 0.002332403  | 0 | 0            | 0 | -0.01064989  | 0            |
| 0 | -0.12562236  | 0 | 0.034555816  | 0 | -0.053464881 | 0 | 0.00672182   | 0            |
| 0 | -0.12715243  | 0 | 0            | 0 | -0.02790665  | 0 | 0            | -0.27523976  |
| 0 | -0.12664329  | 0 | 0.034125979  | 0 | -0.05683201  | 0 | 0            | 0.10167526   |
| 0 | -0.1249843   | 0 | 0            | 0 | -0.024752147 | 0 | 0.008019247  | -0.27829374  |
| 0 | -0.12286964  | 0 | 0.03422322   | 0 | -0.051432087 | 0 | 0.00471759   | 0.10219855   |
| 0 | 0            | 0 | 0            | 0 | 0            | 0 | 0            | -0.39191788  |
| 0 | 0            | 0 | 0            | 0 | 0            | 0 | 0.037530934  | -0.41712105  |
| 0 | 0            | 0 | 0            | 0 | 0            | 0 | 0            | -0.39097855  |
| 0 | 0            | 0 | 0            | 0 | 0            | 0 | 0.035688902  | -0.41597393  |
| 0 | -0.12976142  | 0 | 0            | 0 | -0.028633678 | 0 | 0.001191795  | 0            |
| 0 | 0            | 0 | 0            | 0 | 0            | 0 | 0            | -0.39169098  |
| 0 | 0            | 0 | 0            | 0 | 0.032442502  | 0 | 0            | -0.38163732  |
| 0 | 0            | 0 | 0            | 0 | 0.030877182  | 0 | 0            | -0.38221484  |
| 0 | -0.1118681   | 0 | 0            | 0 | 0            | 0 | -0.018359712 | -0.26711806  |
| 0 | -0.10899405  | 0 | 0.005177951  | 0 | 0            | 0 | -0.017228213 | -0.26642334  |
| 0 | 0            | 0 | 0            | 0 | 0            | 0 | 0            | -0.39676992  |
| 0 | 0            | 0 | 0            | 0 | 0            | 0 | 0            | -0.39661996  |
| 0 | 0            | 0 | 0            | 0 | 0.025159263  | 0 | 0            | -0.030723262 |
| 0 | -0.12703689  | 0 | 0            | 0 | -0.02699441  | 0 | -0.000895073 | 0.095620819  |
| 0 | 0            | 0 | 0            | 0 | 0            | 0 | 0.026433644  | -0.030436536 |
| 0 | -0.065520762 | 0 | 0            | 0 | 0.017258525  | 0 | -0.004479503 | 0            |
| 0 | 0            | 0 | 0            | 0 | 0.020728368  | 0 | 0.022377872  | -0.024781996 |
| 0 | 0            | 0 | 0            | 0 | 0.023862449  | 0 | 0            | -0.030559698 |
| 0 | 0            | 0 | 0            | 0 | 0.025417649  | 0 | 0            | 0            |
| 0 | -0.11682289  | 0 | -0.00517374  | 0 | 0            | 0 | 0            | -0.2756058   |

[illegible]

|   |              |   |             |   |              |              |              |              |
|---|--------------|---|-------------|---|--------------|--------------|--------------|--------------|
| 0 | 0            | 0 | 0           | 0 | 0            | -0.000627536 | 0            | -0.38073093  |
| 0 | 0            | 0 | 0           | 0 | -0.004776546 | 0            | 0            | -0.38402231  |
| 0 | 0            | 0 | 0           | 0 | -0.004232918 | 0            | 0.00351508   | -0.3849703   |
| 0 | 0            | 0 | 0           | 0 | 0            | 0            | -0.002865542 | -0.38027512  |
| 0 | 0            | 0 | 0           | 0 | -0.006013149 | 0            | 0            | -0.38438234  |
| 0 | 0            | 0 | 0           | 0 | -0.005627175 | 0            | 0.003220891  | -0.38532697  |
| 0 | 0            | 0 | 0           | 0 | 0            | 0            | -0.003826889 | -0.3795661   |
| 0 | 0            | 0 | 0.018870042 | 0 | 0            | 0            | -0.015900415 | -0.02076413  |
| 0 | 0            | 0 | 0.019227219 | 0 | 0            | 0            | -0.016193855 | 0            |
| 0 | 0            | 0 | 0.019073304 | 0 | 0            | 0            | -0.016481523 | -0.020827951 |
| 0 | 0            | 0 | 0.019012673 | 0 | 0            | 0            | -0.017353086 | -0.020778163 |
| 0 | 0            | 0 | 0.019519607 | 0 | 0            | 0            | -0.016429152 | 0            |
| 0 | 0            | 0 | 0.019458405 | 0 | 0            | 0            | -0.01729751  | 0            |
| 0 | 0            | 0 | 0.012299618 | 0 | 0            | 0            | 0            | -0.019979029 |
| 0 | 0            | 0 | 0.012782283 | 0 | 0            | 0            | 0            | 0            |
| 0 | 0            | 0 | 0.021645721 | 0 | 0            | 0            | -0.015115667 | 0            |
| 0 | 0            | 0 | 0           | 0 | -0.005121709 | 0            | 0            | -0.025810675 |
| 0 | 0            | 0 | 0           | 0 | 0            | 0            | -0.004287346 | -0.025527092 |
| 0 | 0            | 0 | 0           | 0 | -0.003300566 | 0            | 0.001638959  | -0.024335651 |
| 0 | 0            | 0 | 0           | 0 | -0.004741028 | 0            | 0            | 0            |
| 0 | 0            | 0 | 0           | 0 | -0.003502726 | 0            | -0.001630513 | -0.025694556 |
| 0 | 0            | 0 | 0           | 0 | 0            | 0            | -0.003945589 | 0            |
| 0 | 0            | 0 | 0           | 0 | -0.003146679 | 0            | 0.001474651  | 0            |
| 0 | 0            | 0 | 0           | 0 | -0.004711739 | 0            | -0.001673713 | -0.025719387 |
| 0 | 0            | 0 | 0           | 0 | -0.003188412 | 0            | -0.001520451 | 0            |
| 0 | 0            | 0 | 0           | 0 | -0.004389398 | 0            | -0.001570333 | 0            |
| 0 | -0.068998104 | 0 | 0.025231172 | 0 | -0.024576126 | 0            | -0.030630946 | 0            |
| 0 | 0            | 0 | 0           | 0 | -0.003003327 | 0            | 0.001804775  | 0            |
| 0 | 0            | 0 | 0           | 0 | 0.051130159  | 0            | -0.011949362 | -0.38349586  |
| 0 | 0            | 0 | 0           | 0 | 0.042857444  | 0            | 0            | -0.39908226  |
| 0 | 0            | 0 | 0           | 0 | 0.050689608  | 0            | -0.019977255 | -0.023352654 |
| 0 | 0            | 0 | 0           | 0 | 0.050803516  | 0            | -0.019797353 | 0            |
| 0 | 0            | 0 | 0           | 0 | 0.14023088   | 0            | 0.12021416   | -0.54358029  |
| 0 | -0.043045825 | 0 | 0           | 0 | 0.093258009  | 0            | 0.11962162   | 0            |
| 0 | 0            | 0 | 0           | 0 | 0.12367725   | 0            | 0.12014628   | -0.052543831 |
| 0 | -0.042816108 | 0 | 0           | 0 | 0.093843516  | 0            | 0.11925861   | 0            |
| 0 | 0            | 0 | 0           | 0 | 0            | 0            | 0.006095293  | -0.41677313  |
| 0 | 0            | 0 | 0           | 0 | 0.12374618   | 0            | 0.11987762   | -0.052509947 |
| 0 | -0.04073382  | 0 | 0.02001092  | 0 | 0.092963861  | 0            | 0.11218859   | 0            |
| 0 | 0            | 0 | 0           | 0 | 0.12346598   | 0            | 0.11944049   | 0            |
| 0 | -0.026347801 | 0 | 0           | 0 | 0.1222105    | 0            | 0.11396114   | -0.026198517 |
| 0 | 0            | 0 | 0           | 0 | 0.12354011   | 0            | 0.11917515   | 0            |
| 0 | 0            | 0 | 0.017193033 | 0 | 0.12500021   | 0            | 0.11258593   | -0.048240469 |
| 0 | -0.03287711  | 0 | 0           | 0 | 0.11730453   | 0            | 0.11369171   | 0            |
| 0 | -0.042885756 | 0 | 0           | 0 | 0.10988366   | 0            | 0.11397222   | 0            |
| 0 | 0            | 0 | 0           | 0 | 0.14112248   | 0            | 0.11428975   | -0.051768215 |
| 0 | 0            | 0 | 0.018169701 | 0 | 0.12382814   | 0            | 0.11188255   | 0            |

|   |              |   |             |   |              |   |              |   |              |
|---|--------------|---|-------------|---|--------------|---|--------------|---|--------------|
| 0 | 0            | 0 | 0           | 0 | 0.14084858   | 0 | 0.11361718   | 0 | 0            |
| 0 | -0.049059699 | 0 | 0.050073277 | 0 | 0            | 0 | 0.11993074   | 0 | 0            |
| 0 | -0.048464587 | 0 | 0.050410381 | 0 | 0            | 0 | 0.11965775   | 0 | 0            |
| 0 | 0            | 0 | 0.030188267 | 0 | 0.091650303  | 0 | 0.11714675   | 0 | 0            |
| 0 | 0            | 0 | 0.05232194  | 0 | 0.091050357  | 0 | 0.11086994   | 0 | 0            |
| 0 | 0            | 0 | 0.030528905 | 0 | 0.091142959  | 0 | 0.11693873   | 0 | 0            |
| 0 | 0            | 0 | 0           | 0 | 0.12051344   | 0 | 0.13348401   | 0 | -0.52241356  |
| 0 | 0            | 0 | 0           | 0 | 0.12021286   | 0 | 0.13330162   | 0 | -0.5225299   |
| 0 | -0.044424109 | 0 | 0.084582368 | 0 | 0            | 0 | 0.10935521   | 0 | 0            |
| 0 | 0            | 0 | 0.037029553 | 0 | -0.004826399 | 0 | -0.04881437  | 0 | -0.34507185  |
| 0 | 0            | 0 | 0.034486326 | 0 | 0            | 0 | -0.048911704 | 0 | -0.34389173  |
| 0 | -0.027018838 | 0 | 0           | 0 | 0.11999549   | 0 | 0.12689274   | 0 | -0.49454567  |
| 0 | 0            | 0 | 0.019130542 | 0 | 0.12149284   | 0 | 0.12531153   | 0 | -0.5169417   |
| 0 | 0            | 0 | 0           | 0 | 0.12081882   | 0 | 0.11912092   | 0 | 0            |
| 0 | 0            | 0 | 0           | 0 | 0.1203545    | 0 | 0.11898726   | 0 | 0            |
| 0 | 0            | 0 | 0.093781657 | 0 | 0            | 0 | 0.11815745   | 0 | 0            |
| 0 | 0            | 0 | 0           | 0 | 0.1209308    | 0 | 0.11883791   | 0 | 0            |
| 0 | 0            | 0 | 0.093512202 | 0 | 0            | 0 | 0.11795928   | 0 | 0            |
| 0 | 0            | 0 | 0           | 0 | 0.13914562   | 0 | 0.12703247   | 0 | -0.52258068  |
| 0 | -0.029614135 | 0 | 0.023321473 | 0 | 0.077950101  | 0 | 0.12538658   | 0 | 0            |
| 0 | -0.029354838 | 0 | 0.023751939 | 0 | 0.077446962  | 0 | 0.12513726   | 0 | 0            |
| 0 | 0            | 0 | 0.037093052 | 0 | -0.002666705 | 0 | -0.049987462 | 0 | -0.01014832  |
| 0 | 0            | 0 | 0.037661261 | 0 | -0.003032687 | 0 | -0.049654118 | 0 | 0            |
| 0 | 0            | 0 | 0.022343127 | 0 | 0.099443208  | 0 | 0.12577611   | 0 | -0.030332981 |
| 0 | 0            | 0 | 0.022774638 | 0 | 0.098528578  | 0 | 0.1256128    | 0 | -0.030325342 |
| 0 | -0.026061956 | 0 | 0           | 0 | 0.10300042   | 0 | 0.12712888   | 0 | -0.009363275 |
| 0 | -0.032328649 | 0 | 0           | 0 | 0.098315706  | 0 | 0.12677419   | 0 | 0            |
| 0 | -0.032188038 | 0 | 0           | 0 | 0.098342148  | 0 | 0.12691084   | 0 | 0            |
| 0 | -0.032315343 | 0 | 0           | 0 | 0.098493794  | 0 | 0.12687309   | 0 | 0            |
| 0 | -0.025433278 | 0 | 0           | 0 | 0.1033483    | 0 | 0.12688359   | 0 | -0.010012567 |
| 0 | -0.032144546 | 0 | 0           | 0 | 0.098357637  | 0 | 0.12648457   | 0 | 0            |
| 0 | -0.031709744 | 0 | 0           | 0 | 0.098887466  | 0 | 0.12660195   | 0 | 0            |
| 0 | 0            | 0 | 0           | 0 | 0.027739609  | 0 | -0.047655213 | 0 | -0.35293179  |
| 0 | -0.074651844 | 0 | 0.05435402  | 0 | 0            | 0 | 0.10940702   | 0 | 0            |
| 0 | 0            | 0 | 0.023211441 | 0 | 0.098438163  | 0 | 0.12515812   | 0 | 0            |
| 0 | 0            | 0 | 0.023641582 | 0 | 0.097525659  | 0 | 0.12499548   | 0 | 0            |
| 0 | -0.02712442  | 0 | 0.034115261 | 0 | 0.089967011  | 0 | 0.11893544   | 0 | 0            |
| 0 | 0            | 0 | 0           | 0 | 0.12053119   | 0 | 0.12738628   | 0 | -0.03458164  |
| 0 | 0            | 0 | 0           | 0 | 0.12097078   | 0 | 0.12729938   | 0 | -0.034543927 |
| 0 | -0.071054962 | 0 | 0.055328117 | 0 | 0            | 0 | 0.10888647   | 0 | 0.030931591  |
| 0 | 0            | 0 | 0.047705252 | 0 | 0.075815778  | 0 | 0.1237812    | 0 | 0            |
| 0 | 0            | 0 | 0           | 0 | 0.12062948   | 0 | 0.12709927   | 0 | -0.03460898  |
| 0 | 0            | 0 | 0.047913104 | 0 | 0.075205851  | 0 | 0.12358776   | 0 | 0            |
| 0 | 0            | 0 | 0.06464126  | 0 | 0            | 0 | 0.12055721   | 0 | -0.037245449 |
| 0 | 0            | 0 | 0.064734849 | 0 | 0            | 0 | 0.12065783   | 0 | -0.037168935 |
| 0 | -0.034333584 | 0 | 0.021149785 | 0 | 0.095682805  | 0 | 0.11880283   | 0 | 0            |
| 0 | -0.028176006 | 0 | 0.020222323 | 0 | 0.10117199   | 0 | 0.11897566   | 0 | -0.002203883 |



|   |              |   |             |   |              |   |            |   |              |
|---|--------------|---|-------------|---|--------------|---|------------|---|--------------|
| 0 | 0            | 0 | 0           | 0 | 0.12037452   | 0 | 0.12676946 | 0 | 0            |
| 0 | 0            | 0 | 0           | 0 | 0.12081072   | 0 | 0.12668728 | 0 | 0            |
| 0 | 0            | 0 | 0           | 0 | 0.1204825    | 0 | 0.12648824 | 0 | 0            |
| 0 | 0            | 0 | 0.065099682 | 0 | 0            | 0 | 0.11996886 | 0 | 0            |
| 0 | 0            | 0 | 0.034779691 | 0 | 0.10863636   | 0 | 0.11905531 | 0 | -0.026274414 |
| 0 | 0            | 0 | 0.065193642 | 0 | 0            | 0 | 0.12006956 | 0 | 0            |
| 0 | -0.031441338 | 0 | 0.071739332 | 0 | 0            | 0 | 0.12702388 | 0 | 0            |
| 0 | -0.031027031 | 0 | 0.071676984 | 0 | 0            | 0 | 0.12676408 | 0 | 0            |
| 0 | -0.083464091 | 0 | 0           | 0 | 0            | 0 | 0.12503435 | 0 | 0            |
| 0 | 0            | 0 | 0.029305421 | 0 | 0.090539801  | 0 | 0.12360345 | 0 | 0            |
| 0 | 0            | 0 | 0.036321686 | 0 | 0.10699692   | 0 | 0.11850991 | 0 | 0            |
| 0 | -0.02749255  | 0 | 0           | 0 | 0.12024613   | 0 | 0.12068069 | 0 | -0.00673161  |
| 0 | -0.033741099 | 0 | 0           | 0 | 0.11553506   | 0 | 0.12051009 | 0 | 0            |
| 0 | -0.082663585 | 0 | 0           | 0 | 0            | 0 | 0.1246818  | 0 | 0            |
| 0 | 0            | 0 | 0.10651724  | 0 | 0            | 0 | 0.10805106 | 0 | -0.027809848 |
| 0 | -0.079819048 | 0 | 0           | 0 | 0            | 0 | 0.12491524 | 0 | 0.027596022  |
| 0 | -0.05960221  | 0 | 0.048418787 | 0 | 0            | 0 | 0.12619423 | 0 | 0            |
| 0 | -0.058412694 | 0 | 0.048817756 | 0 | 0            | 0 | 0.12595164 | 0 | 0            |
| 0 | 0            | 0 | 0.10697796  | 0 | 0            | 0 | 0.10766908 | 0 | 0            |
| 0 | -0.078950399 | 0 | 0           | 0 | 0            | 0 | 0.12458428 | 0 | 0.026807641  |
| 0 | 0            | 0 | 0.037129845 | 0 | -0.029771232 | 0 | 0          | 0 | -0.38429993  |
| 0 | -0.055653668 | 0 | 0.049224837 | 0 | 0            | 0 | 0.12606325 | 0 | 0.029607545  |
| 0 | -0.054391259 | 0 | 0.049622952 | 0 | 0            | 0 | 0.12585028 | 0 | 0.028343079  |
| 0 | -0.064955759 | 0 | 0           | 0 | 0            | 0 | 0.12623988 | 0 | 0            |
| 0 | -0.065339377 | 0 | 0           | 0 | 0            | 0 | 0.12602894 | 0 | 0            |
| 0 | -0.064778459 | 0 | 0           | 0 | 0            | 0 | 0.12567425 | 0 | 0            |
| 0 | 0            | 0 | 0           | 0 | 0.11877019   | 0 | 0.12526929 | 0 | 0            |
| 0 | 0            | 0 | 0.068291639 | 0 | 0            | 0 | 0.11928013 | 0 | 0            |
| 0 | -0.037905353 | 0 | 0.052544093 | 0 | 0            | 0 | 0.12757695 | 0 | 0            |
| 0 | 0            | 0 | 0.064402422 | 0 | 0            | 0 | 0.1332053  | 0 | -0.50657164  |
| 0 | 0            | 0 | 0.064596867 | 0 | 0            | 0 | 0.13327671 | 0 | -0.50638157  |
| 0 | 0            | 0 | 0.085956965 | 0 | 0            | 0 | 0.12647649 | 0 | -0.016380812 |
| 0 | 0            | 0 | 0.086462697 | 0 | 0            | 0 | 0.12661941 | 0 | -0.016102804 |
| 0 | 0            | 0 | 0.086578296 | 0 | 0            | 0 | 0.1260225  | 0 | 0            |
| 0 | -0.070133634 | 0 | 0.055788495 | 0 | 0            | 0 | 0.12142722 | 0 | -0.43607613  |
| 0 | 0            | 0 | 0.087074438 | 0 | 0            | 0 | 0.12617085 | 0 | 0            |
| 0 | 0            | 0 | 0.088556516 | 0 | 0            | 0 | 0.12542659 | 0 | 0            |
| 0 | -0.061217866 | 0 | 0.076340855 | 0 | 0            | 0 | 0.11658379 | 0 | 0            |
| 0 | -0.10047963  | 0 | 0           | 0 | 0            | 0 | 0.11927458 | 0 | -0.44360259  |
| 0 | -0.057433243 | 0 | 0.077797455 | 0 | 0            | 0 | 0.11607502 | 0 | 0.039541237  |
| 0 | 0            | 0 | 0.078878946 | 0 | 0            | 0 | 0.11292989 | 0 | -0.52403135  |
| 0 | -0.078581766 | 0 | 0           | 0 | 0            | 0 | 0.13779741 | 0 | -0.44433476  |
| 0 | -0.077500512 | 0 | 0           | 0 | 0            | 0 | 0.13751092 | 0 | -0.44567649  |
| 0 | 0            | 0 | 0.10402478  | 0 | 0            | 0 | 0.12093481 | 0 | -0.49422476  |
| 0 | 0            | 0 | 0.023137468 | 0 | 0.11810988   | 0 | 0          | 0 | -0.42240684  |
| 0 | -0.025815444 | 0 | 0           | 0 | 0.12117054   | 0 | 0          | 0 | -0.40080803  |
| 0 | 0            | 0 | 0.064719023 | 0 | 0            | 0 | 0.12726976 | 0 | -0.020694367 |

|   |              |   |             |   |             |   |            |   |              |
|---|--------------|---|-------------|---|-------------|---|------------|---|--------------|
| 0 | 0            | 0 | 0           | 0 | 0.13163666  | 0 | 0          | 0 | -0.42475312  |
| 0 | 0            | 0 | 0           | 0 | 0.13186961  | 0 | 0          | 0 | -0.42495262  |
| 0 | -0.036258996 | 0 | 0.045006768 | 0 | 0.073567367 | 0 | 0          | 0 | 0            |
| 0 | 0            | 0 | 0.065141221 | 0 | 0           | 0 | 0.12676235 | 0 | 0            |
| 0 | 0            | 0 | 0           | 0 | 0.13955077  | 0 | 0          | 0 | -0.42756967  |
| 0 | 0            | 0 | 0.043507325 | 0 | 0.10116363  | 0 | 0          | 0 | -0.042245413 |
| 0 | -0.039210102 | 0 | 0.027326687 | 0 | 0.077568346 | 0 | 0          | 0 | 0            |
| 0 | -0.039077974 | 0 | 0.027440324 | 0 | 0.077851616 | 0 | 0          | 0 | 0            |
| 0 | -0.10413593  | 0 | 0           | 0 | 0           | 0 | 0.11361078 | 0 | 0            |
| 0 | -0.027064832 | 0 | 0.023883689 | 0 | 0.098801112 | 0 | 0          | 0 | -0.019701205 |
| 0 | -0.082799993 | 0 | 0           | 0 | 0           | 0 | 0.13143703 | 0 | 0            |
| 0 | -0.081884866 | 0 | 0           | 0 | 0           | 0 | 0.13195601 | 0 | 0            |
| 0 | -0.032136819 | 0 | 0.024689435 | 0 | 0.09425266  | 0 | 0          | 0 | 0            |
| 0 | -0.081761189 | 0 | 0           | 0 | 0           | 0 | 0.1311044  | 0 | 0            |
| 0 | 0            | 0 | 0.044745461 | 0 | 0.099852493 | 0 | 0          | 0 | 0            |
| 0 | 0            | 0 | 0.024753851 | 0 | 0.10765205  | 0 | 0          | 0 | -0.046149542 |
| 0 | 0            | 0 | 0.024918047 | 0 | 0.10749693  | 0 | 0          | 0 | -0.046101497 |
| 0 | -0.025571007 | 0 | 0           | 0 | 0.11402464  | 0 | 0          | 0 | -0.026299395 |
| 0 | -0.10116985  | 0 | 0           | 0 | 0           | 0 | 0.112917   | 0 | 0.051029245  |
| 0 | -0.025355437 | 0 | 0           | 0 | 0.11460739  | 0 | 0          | 0 | -0.02647679  |
| 0 | -0.079313017 | 0 | 0           | 0 | 0           | 0 | 0.13121089 | 0 | 0.044069161  |
| 0 | -0.078326156 | 0 | 0           | 0 | 0           | 0 | 0.13174807 | 0 | 0.043181939  |
| 0 | -0.078201984 | 0 | 0           | 0 | 0           | 0 | 0.13090366 | 0 | 0.04287065   |
| 0 | 0            | 0 | 0.02551334  | 0 | 0.10675181  | 0 | 0          | 0 | 0            |
| 0 | 0            | 0 | 0.025668674 | 0 | 0.10656562  | 0 | 0          | 0 | 0            |
| 0 | -0.0306827   | 0 | 0           | 0 | 0.1103021   | 0 | 0          | 0 | 0            |
| 0 | -0.03048189  | 0 | 0           | 0 | 0.11091751  | 0 | 0          | 0 | 0            |
| 0 | -0.025972318 | 0 | 0           | 0 | 0.12163795  | 0 | 0          | 0 | -0.025572786 |
| 0 | -0.042384617 | 0 | 0           | 0 | 0.10219014  | 0 | 0          | 0 | 0            |
| 0 | -0.042304226 | 0 | 0           | 0 | 0.10181947  | 0 | 0          | 0 | 0            |
| 0 | -0.042211697 | 0 | 0           | 0 | 0.10244951  | 0 | 0          | 0 | 0            |
| 0 | -0.031139872 | 0 | 0           | 0 | 0.11775211  | 0 | 0          | 0 | 0            |
| 0 | 0            | 0 | 0           | 0 | 0           | 0 | 0.13574862 | 0 | -0.54842022  |
| 0 | 0            | 0 | 0           | 0 | 0.13190327  | 0 | 0          | 0 | -0.051087837 |
| 0 | 0            | 0 | 0           | 0 | 0.13180222  | 0 | 0          | 0 | -0.051064965 |
| 0 | 0            | 0 | 0           | 0 | 0.13214018  | 0 | 0          | 0 | -0.051062717 |
| 0 | 0            | 0 | 0           | 0 | 0           | 0 | 0.13594496 | 0 | -0.54845065  |
| 0 | -0.040560918 | 0 | 0.078963462 | 0 | 0           | 0 | 0          | 0 | 0            |
| 0 | -0.040290081 | 0 | 0.079070152 | 0 | 0           | 0 | 0          | 0 | 0            |
| 0 | 0            | 0 | 0           | 0 | 0.13170298  | 0 | 0          | 0 | 0            |
| 0 | 0            | 0 | 0           | 0 | 0.1316033   | 0 | 0          | 0 | 0            |
| 0 | 0            | 0 | 0           | 0 | 0.13193978  | 0 | 0          | 0 | 0            |
| 0 | -0.054633279 | 0 | 0           | 0 | 0           | 0 | 0.1340554  | 0 | 0            |
| 0 | 0            | 0 | 0.059499738 | 0 | 0.074578247 | 0 | 0          | 0 | 0            |
| 0 | 0            | 0 | 0.059530976 | 0 | 0.074627584 | 0 | 0          | 0 | 0            |
| 0 | -0.056693219 | 0 | 0.082281613 | 0 | 0           | 0 | 0          | 0 | 0            |
| 0 | -0.053610712 | 0 | 0.083463196 | 0 | 0           | 0 | 0          | 0 | 0.019339401  |

|   |              |   |             |   |             |            |   |              |
|---|--------------|---|-------------|---|-------------|------------|---|--------------|
| 0 | -0.061362017 | 0 | 0.053917439 | 0 | 0           | 0          | 0 | 0            |
| 0 | -0.060652844 | 0 | 0.054216776 | 0 | 0           | 0          | 0 | 0            |
| 0 | -0.058277916 | 0 | 0.054526913 | 0 | 0           | 0          | 0 | 0.017807647  |
| 0 | -0.057515619 | 0 | 0.054827438 | 0 | 0           | 0          | 0 | 0.017139334  |
| 0 | -0.068047355 | 0 | 0.058813752 | 0 | 0           | 0          | 0 | -0.34643473  |
| 0 | -0.10065837  | 0 | 0           | 0 | 0           | 0.12543404 | 0 | -0.42321521  |
| 0 | 0            | 0 | 0.034665936 | 0 | 0.09511595  | 0          | 0 | 0            |
| 0 | -0.048016623 | 0 | 0.056470459 | 0 | 0           | 0          | 0 | 0            |
| 0 | 0            | 0 | 0.095965211 | 0 | 0           | 0          | 0 | -0.030699357 |
| 0 | 0            | 0 | 0.096256597 | 0 | 0           | 0          | 0 | -0.03063335  |
| 0 | 0            | 0 | 0.09642272  | 0 | 0           | 0          | 0 | 0            |
| 0 | 0            | 0 | 0.096712197 | 0 | 0           | 0          | 0 | 0            |
| 0 | 0            | 0 | 0           | 0 | 0           | 0.12983881 | 0 | -0.047631983 |
| 0 | 0            | 0 | 0           | 0 | 0           | 0.12936863 | 0 | -0.047560444 |
| 0 | 0            | 0 | 0.10811227  | 0 | 0           | 0          | 0 | -0.40418751  |
| 0 | 0            | 0 | 0           | 0 | 0           | 0.12960289 | 0 | -0.047493282 |
| 0 | 0            | 0 | 0           | 0 | 0           | 0.1291764  | 0 | 0            |
| 0 | 0            | 0 | 0           | 0 | 0           | 0.12871149 | 0 | 0            |
| 0 | 0            | 0 | 0           | 0 | 0           | 0.12894614 | 0 | 0            |
| 0 | 0            | 0 | 0.10016028  | 0 | 0           | 0          | 0 | 0            |
| 0 | 0            | 0 | 0           | 0 | 0.12884078  | 0          | 0 | 0            |
| 0 | 0            | 0 | 0.070875587 | 0 | 0           | 0          | 0 | -0.40538418  |
| 0 | 0            | 0 | 0.071032139 | 0 | 0           | 0          | 0 | -0.40537666  |
| 0 | -0.028018237 | 0 | 0.02690487  | 0 | 0.093555139 | 0          | 0 | -0.36200425  |
| 0 | 0            | 0 | 0.028142419 | 0 | 0.10143809  | 0          | 0 | -0.38714816  |
| 0 | 0            | 0 | 0.027892518 | 0 | 0.10210669  | 0          | 0 | -0.38712869  |
| 0 | 0            | 0 | 0.041349547 | 0 | 0.10099801  | 0          | 0 | -0.38638607  |
| 0 | 0            | 0 | 0           | 0 | 0           | 0.1426559  | 0 | -0.52892175  |
| 0 | 0            | 0 | 0           | 0 | 0           | 0.1419543  | 0 | -0.52912872  |
| 0 | 0            | 0 | 0           | 0 | 0           | 0.14219245 | 0 | -0.52894243  |
| 0 | -0.026378551 | 0 | 0           | 0 | 0.1109308   | 0          | 0 | -0.3663163   |
| 0 | -0.026093198 | 0 | 0           | 0 | 0.11115841  | 0          | 0 | -0.36680097  |
| 0 | -0.024155594 | 0 | 0.042097868 | 0 | 0.073365049 | 0          | 0 | 0            |
| 0 | -0.024033242 | 0 | 0.042245833 | 0 | 0.073122829 | 0          | 0 | 0            |
| 0 | -0.02748285  | 0 | 0           | 0 | 0.11848485  | 0          | 0 | -0.36854721  |
| 0 | -0.032220919 | 0 | 0.029290238 | 0 | 0.078404854 | 0          | 0 | 0            |
| 0 | -0.031868798 | 0 | 0.029486736 | 0 | 0.078285604 | 0          | 0 | 0            |
| 0 | -0.026566789 | 0 | 0.028605023 | 0 | 0.082852979 | 0          | 0 | 0            |
| 0 | -0.027628365 | 0 | 0.028618178 | 0 | 0.082378389 | 0          | 0 | 0.001548405  |
| 0 | -0.027260918 | 0 | 0.028822644 | 0 | 0.082222236 | 0          | 0 | 0.001194126  |
| 0 | -0.031352935 | 0 | 0.041816938 | 0 | 0.078629224 | 0          | 0 | 0            |
| 0 | -0.026794497 | 0 | 0.040907399 | 0 | 0.082892246 | 0          | 0 | 0.004001957  |
| 0 | 0            | 0 | 0           | 0 | 0.12885361  | 0          | 0 | -0.39372902  |
| 0 | 0            | 0 | 0           | 0 | 0.1286135   | 0          | 0 | -0.39385767  |
| 0 | 0            | 0 | 0           | 0 | 0.12890599  | 0          | 0 | -0.39348533  |
| 0 | 0            | 0 | 0.070885368 | 0 | 0           | 0          | 0 | -0.034451837 |
| 0 | 0            | 0 | 0.043384497 | 0 | 0.088554035 | 0          | 0 | -0.022022324 |

|   |              |   |             |   |              |   |             |   |              |
|---|--------------|---|-------------|---|--------------|---|-------------|---|--------------|
| 0 | 0            | 0 | 0.043260801 | 0 | 0.089041298  | 0 | 0           | 0 | -0.021995444 |
| 0 | 0            | 0 | 0           | 0 | 0            | 0 | 0.12844109  | 0 | 0            |
| 0 | 0            | 0 | 0.04452781  | 0 | 0.087355972  | 0 | 0           | 0 | 0            |
| 0 | 0            | 0 | 0.044404241 | 0 | 0.087839645  | 0 | 0           | 0 | 0            |
| 0 | 0            | 0 | 0.071220585 | 0 | 0            | 0 | 0           | 0 | 0            |
| 0 | -0.084217797 | 0 | 0           | 0 | 0            | 0 | 0           | 0 | -0.33539556  |
| 0 | 0            | 0 | 0.028224328 | 0 | 0.10137234   | 0 | 0           | 0 | -0.025242397 |
| 0 | -0.083608001 | 0 | 0           | 0 | 0            | 0 | 0           | 0 | -0.33633972  |
| 0 | 0            | 0 | 0.028864569 | 0 | 0.10059846   | 0 | 0           | 0 | 0            |
| 0 | 0            | 0 | 0.051718145 | 0 | 0.079708841  | 0 | 0           | 0 | 0            |
| 0 | -0.027197447 | 0 | 0           | 0 | 0.11001594   | 0 | 0           | 0 | -0.004287861 |
| 0 | -0.031889934 | 0 | 0           | 0 | 0.10660647   | 0 | 0           | 0 | 0            |
| 0 | -0.030014453 | 0 | 0           | 0 | 0.10787189   | 0 | 0           | 0 | 0            |
| 0 | -0.026902106 | 0 | 0           | 0 | 0.11018735   | 0 | 0           | 0 | -0.00459885  |
| 0 | -0.031609446 | 0 | 0           | 0 | 0.106811     | 0 | 0           | 0 | 0            |
| 0 | -0.026637682 | 0 | 0           | 0 | 0.11074313   | 0 | 0           | 0 | -0.004741711 |
| 0 | -0.031326008 | 0 | 0           | 0 | 0.10740099   | 0 | 0           | 0 | 0            |
| 0 | -0.05040413  | 0 | 0.073514806 | 0 | 0            | 0 | 0           | 0 | 0            |
| 0 | -0.049751858 | 0 | 0.073605907 | 0 | 0            | 0 | 0           | 0 | 0            |
| 0 | -0.056055417 | 0 | 0.055820356 | 0 | 0            | 0 | 0           | 0 | -0.32248327  |
| 0 | -0.057001302 | 0 | 0.055591651 | 0 | 0            | 0 | 0           | 0 | -0.3213817   |
| 0 | -0.054773526 | 0 | 0.080672014 | 0 | 0            | 0 | 0           | 0 | -0.32229446  |
| 0 | -0.047375353 | 0 | 0.074398143 | 0 | 0            | 0 | 0           | 0 | 0.030747428  |
| 0 | -0.046677293 | 0 | 0.074480902 | 0 | 0            | 0 | 0           | 0 | 0.030008914  |
| 0 | 0            | 0 | 0           | 0 | 0.12863074   | 0 | 0           | 0 | -0.030548852 |
| 0 | -0.087258545 | 0 | 0           | 0 | 0            | 0 | 0           | 0 | 0            |
| 0 | -0.086822092 | 0 | 0           | 0 | 0            | 0 | 0           | 0 | 0            |
| 0 | 0            | 0 | 0           | 0 | 0.1284871    | 0 | 0           | 0 | 0            |
| 0 | -0.086663479 | 0 | 0           | 0 | 0            | 0 | 0           | 0 | 0            |
| 0 | 0            | 0 | 0           | 0 | 0            | 0 | 0.13603433  | 0 | -0.031032446 |
| 0 | -0.084589281 | 0 | 0           | 0 | 0            | 0 | 0           | 0 | 0.033966439  |
| 0 | -0.084106327 | 0 | 0           | 0 | 0            | 0 | 0           | 0 | 0.033456995  |
| 0 | -0.083942678 | 0 | 0           | 0 | 0            | 0 | 0           | 0 | 0.033379843  |
| 0 | -0.028527311 | 0 | 0.079432038 | 0 | 0            | 0 | 0           | 0 | 0            |
| 0 | 0            | 0 | 0           | 0 | 0            | 0 | 0.13545243  | 0 | 0            |
| 0 | 0            | 0 | 0.093067883 | 0 | 0            | 0 | 0           | 0 | -0.36861784  |
| 0 | 0            | 0 | 0.093573373 | 0 | 0            | 0 | 0           | 0 | -0.36835468  |
| 0 | -0.059343185 | 0 | 0.055118143 | 0 | 0            | 0 | 0           | 0 | 0            |
| 0 | -0.05645354  | 0 | 0.055697941 | 0 | 0            | 0 | 0           | 0 | 0.035573966  |
| 0 | -0.066428843 | 0 | 0           | 0 | 0            | 0 | 0           | 0 | 0            |
| 0 | -0.043843551 | 0 | 0.088773425 | 0 | -0.046500091 | 0 | 0           | 0 | 0            |
| 0 | -0.10008402  | 0 | 0           | 0 | 0            | 0 | 0           | 0 | -0.32914664  |
| 0 | -0.043420528 | 0 | 0.089481145 | 0 | -0.047678389 | 0 | 0           | 0 | 0            |
| 0 | -0.03844946  | 0 | 0.08951069  | 0 | -0.056973129 | 0 | 0.051242267 | 0 | 0            |
| 0 | 0            | 0 | 0.093236125 | 0 | 0            | 0 | 0           | 0 | -0.010852487 |
| 0 | -0.038009767 | 0 | 0.09032518  | 0 | -0.058427691 | 0 | 0.050446235 | 0 | 0            |
| 0 | 0            | 0 | 0.093681053 | 0 | 0            | 0 | 0           | 0 | 0            |

|   |              |   |             |   |              |             |             |              |
|---|--------------|---|-------------|---|--------------|-------------|-------------|--------------|
| 0 | -0.063013201 | 0 | 0.05239247  | 0 | 0            | 0           | 0           | 0            |
| 0 | -0.060134935 | 0 | 0.053102915 | 0 | 0            | 0           | 0           | 0.033594218  |
| 0 | -0.062772141 | 0 | 0.052579697 | 0 | 0            | 0           | 0           | 0            |
| 0 | -0.06514128  | 0 | 0.076940462 | 0 | -0.03028157  | 0           | 0           | 0            |
| 0 | -0.057525377 | 0 | 0.056687002 | 0 | 0            | 0           | 0           | -0.31093891  |
| 0 | -0.064812984 | 0 | 0.077610854 | 0 | -0.031446835 | 0           | 0           | 0            |
| 0 | -0.06382345  | 0 | 0.048953892 | 0 | 0            | 0.024153618 | 0           | 0            |
| 0 | 0            | 0 | 0.071528646 | 0 | 0            | 0           | 0           | -0.37598013  |
| 0 | -0.059857899 | 0 | 0.053281652 | 0 | 0            | 0           | 0           | 0.033689005  |
| 0 | -0.05720098  | 0 | 0.056650073 | 0 | 0            | 0           | 0           | -0.31170914  |
| 0 | -0.086906049 | 0 | 0.092781748 | 0 | -0.051289152 | 0           | 0           | 0            |
| 0 | -0.062259395 | 0 | 0.077163898 | 0 | -0.02953404  | 0           | 0           | 0.047374711  |
| 0 | -0.063354033 | 0 | 0.049412851 | 0 | 0            | 0.02263851  | 0           | 0            |
| 0 | -0.060760587 | 0 | 0.049866664 | 0 | 0            | 0.023747433 | 0           | 0.041085397  |
| 0 | -0.061901172 | 0 | 0.077840569 | 0 | -0.030722566 | 0           | 0           | 0.047116101  |
| 0 | -0.040691456 | 0 | 0.055178319 | 0 | 0            | 0.011371449 | 0           | 0            |
| 0 | -0.04057071  | 0 | 0.057703014 | 0 | 0            | 0           | 0           | 0            |
| 0 | -0.060259686 | 0 | 0.050310953 | 0 | 0            | 0.022231963 | 0           | 0.040723337  |
| 0 | -0.084339099 | 0 | 0.093163559 | 0 | -0.050555111 | 0           | 0           | 0.063577351  |
| 0 | -0.040240352 | 0 | 0.05557773  | 0 | 0            | 0.010068952 | 0           | 0            |
| 0 | 0            | 0 | 0.11474249  | 0 | -0.061810876 | 0           | 0.037049722 | 0            |
| 0 | -0.092176984 | 0 | 0.092967688 | 0 | -0.058931734 | 0           | 0.038962796 | 0            |
| 0 | -0.060435858 | 0 | 0.056176319 | 0 | 0            | 0           | 0           | 0            |
| 0 | 0            | 0 | 0.11519337  | 0 | -0.063202122 | 0           | 0.036555355 | 0            |
| 0 | -0.057567195 | 0 | 0.056910118 | 0 | 0            | 0           | 0           | 0.039390573  |
| 0 | 0            | 0 | 0           | 0 | 0            | 0.11866276  | 0           | -0.55328735  |
| 0 | -0.088861789 | 0 | 0.092941332 | 0 | -0.056841795 | 0           | 0.037138348 | 0.078980315  |
| 0 | -0.035972532 | 0 | 0.056289167 | 0 | 0            | 0.022503232 | 0           | 0            |
| 0 | -0.033738506 | 0 | 0.079205413 | 0 | -0.022939296 | 0           | 0           | 0            |
| 0 | -0.075922707 | 0 | 0.08377115  | 0 | -0.030247653 | 0           | 0           | -0.29654543  |
| 0 | -0.074271141 | 0 | 0.060211832 | 0 | 0            | 0           | 0           | -0.31025768  |
| 0 | -0.084641232 | 0 | 0           | 0 | 0            | 0.036732016 | 0           | -0.33073519  |
| 0 | 0            | 0 | 0.10808532  | 0 | -0.05402786  | 0           | 0.04509007  | 0            |
| 0 | 0            | 0 | 0.10430008  | 0 | -0.039574802 | 0           | 0           | -0.016522657 |
| 0 | 0            | 0 | 0.10617765  | 0 | -0.051627106 | 0           | 0.044377956 | -0.006190338 |
| 0 | 0            | 0 | 0.10702748  | 0 | -0.052185926 | 0           | 0.044515562 | 0            |
| 0 | 0            | 0 | 0.10676375  | 0 | -0.053335165 | 0           | 0.043817453 | -0.006219489 |
| 0 | 0            | 0 | 0.10481265  | 0 | -0.041017064 | 0           | 0           | -0.016342649 |
| 0 | 0            | 0 | 0.10491627  | 0 | -0.039719547 | 0           | 0           | 0            |
| 0 | 0            | 0 | 0.10761167  | 0 | -0.053884876 | 0           | 0.043954333 | 0            |
| 0 | -0.085883092 | 0 | 0           | 0 | 0            | 0           | 0           | -0.31025782  |
| 0 | 0            | 0 | 0.10542632  | 0 | -0.041156958 | 0           | 0           | 0            |
| 0 | 0            | 0 | 0.075828764 | 0 | 0            | 0           | 0           | -0.37245155  |
| 0 | -0.083959434 | 0 | 0           | 0 | 0            | 0           | 0           | -0.30635497  |
| 0 | -0.084172064 | 0 | 0           | 0 | 0            | 0.035121834 | 0           | -0.33044945  |
| 0 | -0.083064757 | 0 | 0           | 0 | 0            | 0           | 0           | -0.30762893  |
| 0 | -0.088136201 | 0 | 0           | 0 | 0            | 0.025377007 | 0           | 0            |

|   |              |   |             |   |              |   |             |              |
|---|--------------|---|-------------|---|--------------|---|-------------|--------------|
| 0 | 0            | 0 | 0.10774531  | 0 | -0.041067823 | 0 | 0           | 0            |
| 0 | -0.083057525 | 0 | 0           | 0 | 0            | 0 | 0           | -0.30649726  |
| 0 | 0            | 0 | 0.075540632 | 0 | 0            | 0 | 0           | -0.3725787   |
| 0 | -0.098269739 | 0 | 0           | 0 | -0.022226068 | 0 | 0.049085051 | 0            |
| 0 | -0.085482215 | 0 | 0           | 0 | 0            | 0 | 0           | -0.31082363  |
| 0 | -0.10760698  | 0 | 0.038135572 | 0 | -0.073568926 | 0 | 0.039454578 | 0            |
| 0 | -0.074117688 | 0 | 0.05997923  | 0 | 0            | 0 | 0.012325059 | -0.31270793  |
| 0 | 0            | 0 | 0.073231768 | 0 | 0            | 0 | 0.020950186 | -0.38198375  |
| 0 | -0.085551321 | 0 | 0           | 0 | 0            | 0 | 0.024838356 | 0.049492933  |
| 0 | -0.087798817 | 0 | 0           | 0 | 0            | 0 | 0.02403503  | 0            |
| 0 | -0.10664657  | 0 | 0.039018541 | 0 | -0.074768345 | 0 | 0.038379013 | 0            |
| 0 | 0            | 0 | 0.09438921  | 0 | -0.021443297 | 0 | 0           | -0.36087955  |
| 0 | -0.097762424 | 0 | 0           | 0 | -0.022535842 | 0 | 0.047625753 | 0            |
| 0 | -0.077221185 | 0 | 0.059481545 | 0 | 0            | 0 | 0.001135721 | 0            |
| 0 | 0            | 0 | 0.094934228 | 0 | -0.023072774 | 0 | 0           | -0.36115375  |
| 0 | 0            | 0 | 0.073102925 | 0 | 0            | 0 | 0.019502988 | -0.38123944  |
| 0 | -0.094725438 | 0 | 0           | 0 | -0.020336133 | 0 | 0.047566063 | 0.064223972  |
| 0 | -0.087449867 | 0 | 0           | 0 | 0            | 0 | 0.035015041 | 0            |
| 0 | -0.085175343 | 0 | 0           | 0 | 0            | 0 | 0.023494101 | 0.049361392  |
| 0 | -0.10135932  | 0 | 0.037807862 | 0 | -0.058683477 | 0 | 0           | 0            |
| 0 | -0.091445535 | 0 | 0           | 0 | -0.005826245 | 0 | 0           | 0            |
| 0 | -0.085961304 | 0 | 0           | 0 | 0            | 0 | 0           | 0            |
| 0 | -0.10446697  | 0 | 0.037775357 | 0 | -0.071653245 | 0 | 0.037720912 | 0.080600289  |
| 0 | -0.088583829 | 0 | 0           | 0 | 0            | 0 | 0           | 0            |
| 0 | -0.074553355 | 0 | 0.060540025 | 0 | 0            | 0 | 0.000179043 | 0.053001852  |
| 0 | -0.10697559  | 0 | 0           | 0 | -0.041781206 | 0 | 0.04068473  | -0.31404307  |
| 0 | -0.10070557  | 0 | 0.038570757 | 0 | -0.059975579 | 0 | 0           | 0            |
| 0 | 0            | 0 | 0.07802408  | 0 | 0            | 0 | 0           | -0.36294321  |
| 0 | -0.09420266  | 0 | 0           | 0 | -0.020672361 | 0 | 0.04612374  | 0.063710991  |
| 0 | -0.10348376  | 0 | 0.038667558 | 0 | -0.072880864 | 0 | 0.036664639 | 0.079738049  |
| 0 | 0            | 0 | 0.074135464 | 0 | 0            | 0 | 0.009642632 | -0.017459769 |
| 0 | -0.091326583 | 0 | 0           | 0 | -0.006443332 | 0 | 0           | 0            |
| 0 | -0.084794172 | 0 | 0           | 0 | 0            | 0 | 0.034724091 | 0.054901585  |
| 0 | -0.090194653 | 0 | 0.037366667 | 0 | -0.042529083 | 0 | 0           | -0.28544305  |
| 0 | -0.048198658 | 0 | 0.10040616  | 0 | -0.046696326 | 0 | 0.010595881 | 0            |
| 0 | -0.088586075 | 0 | 0           | 0 | -0.004987437 | 0 | 0           | 0.049130799  |
| 0 | 0            | 0 | 0.075875522 | 0 | 0            | 0 | 0           | -0.018158924 |
| 0 | 0            | 0 | 0.07463567  | 0 | 0            | 0 | 0.009744678 | 0            |
| 0 | -0.08609229  | 0 | 0           | 0 | 0            | 0 | 0           | 0.047307269  |
| 0 | -0.083480112 | 0 | 0           | 0 | 0            | 0 | 0           | 0.052296289  |
| 0 | -0.098979666 | 0 | 0.037479977 | 0 | -0.058083139 | 0 | 0           | 0.068160453  |
| 0 | -0.089707158 | 0 | 0.038091442 | 0 | -0.044170415 | 0 | 0           | -0.28627155  |
| 0 | -0.10616488  | 0 | 0           | 0 | -0.042110699 | 0 | 0.039420292 | -0.31439639  |
| 0 | 0            | 0 | 0.076391122 | 0 | 0            | 0 | 0           | 0            |
| 0 | 0            | 0 | 0.07408522  | 0 | 0            | 0 | 0.008467815 | -0.017300835 |
| 0 | -0.11274453  | 0 | 0           | 0 | -0.04665802  | 0 | 0.032292151 | 0            |
| 0 | -0.098294266 | 0 | 0.038256804 | 0 | -0.059397079 | 0 | 0           | 0.06781491   |

|   |              |   |              |   |              |             |              |              |
|---|--------------|---|--------------|---|--------------|-------------|--------------|--------------|
| 0 | 0            | 0 | 0.074587146  | 0 | 0            | 0.00857495  | 0            | 0            |
| 0 | -0.08844072  | 0 | 0            | 0 | -0.005621989 | 0           | 0            | 0.049246266  |
| 0 | 0            | 0 | 0.076662337  | 0 | 0            | 0.010780302 | 0            | 0            |
| 0 | -0.10044953  | 0 | 0            | 0 | -0.026318054 | 0           | 0            | -0.29430481  |
| 0 | 0            | 0 | 0.07370877   | 0 | 0            | 0.018761042 | 0            | -0.011909229 |
| 0 | -0.080728925 | 0 | 0            | 0 | 0.008906553  | 0           | 0            | -0.30277548  |
| 0 | 0            | 0 | 0.094577512  | 0 | -0.022093929 | 0           | 0            | -0.008208085 |
| 0 | -0.11184975  | 0 | 0            | 0 | -0.046694819 | 0           | 0.031193522  | 0            |
| 0 | 0            | 0 | 0.095316307  | 0 | -0.022508609 | 0           | 0            | 0            |
| 0 | 0            | 0 | 0.074206998  | 0 | 0            | 0.018597151 | 0            | 0            |
| 0 | -0.084771903 | 0 | 0            | 0 | 0            | 0           | 0            | -0.29974286  |
| 0 | -0.099995027 | 0 | 0            | 0 | -0.0269527   | 0           | 0            | -0.29505094  |
| 0 | -0.062273077 | 0 | 0            | 0 | -0.011217929 | 0           | 0.028826555  | 0            |
| 0 | -0.080666637 | 0 | 0            | 0 | 0.007969523  | 0           | 0            | -0.30339038  |
| 0 | -0.092073788 | 0 | 0.038072567  | 0 | -0.043406326 | 0           | 0            | 0            |
| 0 | -0.10866586  | 0 | 0            | 0 | -0.040913924 | 0           | 0.039234763  | 0            |
| 0 | -0.109618    | 0 | 0            | 0 | -0.045185388 | 0           | 0.030505729  | 0.073330048  |
| 0 | -0.059110172 | 0 | 0            | 0 | 0            | 0           | 0.022688264  | 0            |
| 0 | -0.061820698 | 0 | 0            | 0 | -0.011633459 | 0           | 0.027677967  | 0            |
| 0 | 0            | 0 | 0            | 0 | 0            | 0           | 0            | -0.42069199  |
| 0 | 0            | 0 | 0            | 0 | 0            | 0           | 0            | -0.42108039  |
| 0 | -0.10870515  | 0 | 0            | 0 | -0.045238469 | 0           | 0.029420869  | 0.072624244  |
| 0 | -0.089724774 | 0 | 0.037760678  | 0 | -0.042897908 | 0           | 0            | 0.066668825  |
| 0 | 0            | 0 | 0            | 0 | 0            | 0           | 0            | -0.42102851  |
| 0 | -0.10263838  | 0 | 0            | 0 | -0.0263797   | 0           | 0            | 0            |
| 0 | -0.10543415  | 0 | 0            | 0 | -0.039342769 | 0           | 0.037537427  | 0.074612677  |
| 0 | -0.08354272  | 0 | 0            | 0 | 0.008122661  | 0           | 0            | 0            |
| 0 | -0.059843029 | 0 | 0            | 0 | 0.002693556  | 0           | 0            | 0            |
| 0 | -0.091323176 | 0 | 0            | 0 | -0.010660703 | 0           | 0            | -0.29250538  |
| 0 | -0.1001585   | 0 | 0            | 0 | -0.026068427 | 0           | 0            | 0.062459788  |
| 0 | -0.080701105 | 0 | 0            | 0 | 0.008962352  | 0           | 0            | 0.051142544  |
| 0 | -0.089495718 | 0 | -0.002716265 | 0 | 0            | 0           | 0            | -0.29443528  |
| 0 | -0.05535944  | 0 | 0            | 0 | -0.003983664 | 0           | 0.037412446  | 0            |
| 0 | -0.088294999 | 0 | 0            | 0 | 0            | 0           | -0.002336258 | -0.29272098  |
| 0 | -0.088146733 | 0 | 0            | 0 | 0            | 0           | 0            | -0.29404972  |
| 0 | -0.087738064 | 0 | 0            | 0 | 0            | 0           | 0.002136522  | -0.2946848   |
| 0 | -0.088431862 | 0 | -0.001121908 | 0 | 0            | 0           | 0.003067371  | -0.29517741  |
| 0 | -0.087227978 | 0 | 0.000854034  | 0 | 0            | 0           | 0            | -0.29330413  |
| 0 | -0.088970034 | 0 | -0.002869728 | 0 | 0            | 0           | 0            | -0.29508884  |
| 0 | -0.087699773 | 0 | 0            | 0 | 0            | 0           | -0.003430242 | -0.29277928  |
| 0 | -0.087697571 | 0 | -0.000809283 | 0 | 0            | 0           | 0.001328059  | -0.29492516  |
| 0 | 0            | 0 | 0            | 0 | 0            | 0           | 0            | -0.045660077 |
| 0 | -0.10782463  | 0 | 0            | 0 | 0            | 0           | 0.013031635  | -0.30672651  |
| 0 | 0            | 0 | 0            | 0 | 0            | 0           | 0            | 0            |
| 0 | -0.091478763 | 0 | -0.001615796 | 0 | 0            | 0           | -0.002092344 | 0            |
| 0 | -0.090623403 | 0 | 0            | 0 | 0            | 0           | -0.003136715 | 0            |
| 0 | -0.091762244 | 0 | -0.002515009 | 0 | 0            | 0           | 0            | 0            |

|   |              |   |              |   |              |              |              |              |
|---|--------------|---|--------------|---|--------------|--------------|--------------|--------------|
| 0 | 0            | 0 | 0.11780151   | 0 | -0.033778996 | 0            | 0            | -0.37826433  |
| 0 | -0.090363605 | 0 | -0.000321072 | 0 | 0            | 0.001898147  | 0            | 0            |
| 0 | -0.10646722  | 0 | 0            | 0 | 0.000842052  | 0            | 0            | -0.29829034  |
| 0 | -0.062868702 | 0 | 0.031622729  | 0 | -0.05752706  | 0            | 0.013802215  | 0            |
| 0 | -0.060911719 | 0 | 0.032436201  | 0 | -0.050148627 | 0            | 0            | 0            |
| 0 | -0.062045923 | 0 | 0.032779677  | 0 | -0.059142493 | 0            | 0.013346627  | 0            |
| 0 | -0.090716525 | 0 | -0.001172617 | 0 | 0            | -0.003474301 | 0            | 0            |
| 0 | -0.088983342 | 0 | -0.001162323 | 0 | 0            | -0.002970969 | 0            | 0.057036969  |
| 0 | -0.088294136 | 0 | 0            | 0 | 0            | -0.003721612 | 0            | 0.056666352  |
| 0 | -0.08938741  | 0 | -0.002437429 | 0 | 0            | 0            | 0            | 0.057549763  |
| 0 | -0.087752109 | 0 | 0.000220476  | 0 | 0            | 0.001257792  | 0            | 0.05835511   |
| 0 | -0.10883453  | 0 | 0            | 0 | -0.002551009 | 0            | 0.024614331  | -0.30777029  |
| 0 | -0.088186108 | 0 | -0.000722319 | 0 | 0            | -0.004345383 | 0            | 0.056563866  |
| 0 | -0.11451587  | 0 | 0            | 0 | -0.007506446 | 0            | 0.015422631  | 0            |
| 0 | -0.056951813 | 0 | 0.032160392  | 0 | -0.051403304 | 0            | 0.021865226  | 0            |
| 0 | 0            | 0 | 0.11473388   | 0 | -0.030292722 | 0            | 0.015620657  | -0.38199154  |
| 0 | 0            | 0 | 0.093988749  | 0 | 0            | -0.007017299 | 0            | -0.37166614  |
| 0 | -0.066444009 | 0 | 0            | 0 | -0.031729017 | 0            | 0.014993429  | 0            |
| 0 | -0.11136997  | 0 | 0            | 0 | -0.005583231 | 0            | 0.013535572  | 0.077402865  |
| 0 | 0            | 0 | 0.11915034   | 0 | -0.035614296 | 0            | 0.003922401  | -0.00645214  |
| 0 | 0            | 0 | 0.11981421   | 0 | -0.036053156 | 0            | 0.004367239  | 0            |
| 0 | -0.12636662  | 0 | 0.034037811  | 0 | -0.057096625 | 0            | 0            | -0.26873503  |
| 0 | -0.12408054  | 0 | 0.03410048   | 0 | -0.053830663 | 0            | 0.007634362  | -0.27163927  |
| 0 | -0.057239876 | 0 | 0.001926825  | 0 | 0            | -0.009359232 | 0            | 0            |
| 0 | -0.12878248  | 0 | 0.034470348  | 0 | -0.058000253 | 0            | 0.000881957  | 0            |
| 0 | -0.12812733  | 0 | 0            | 0 | -0.029321225 | 0            | 0.002213783  | -0.27616792  |
| 0 | 0            | 0 | 0            | 0 | 0            | 0.028755931  | 0            | -0.4167894   |
| 0 | -0.12611018  | 0 | 0.03413762   | 0 | -0.056071038 | 0            | -0.001208363 | 0.10104958   |
| 0 | 0            | 0 | 0            | 0 | 0.024831617  | 0            | 0            | -0.39044746  |
| 0 | 0            | 0 | 0            | 0 | 0.018786359  | 0            | 0.025555274  | -0.40476368  |
| 0 | 0            | 0 | 0            | 0 | 0            | 0.027340732  | 0            | -0.41567369  |
| 0 | 0            | 0 | 0            | 0 | 0.023543148  | 0            | 0            | -0.39071602  |
| 0 | 0            | 0 | 0            | 0 | 0.017531206  | 0            | 0.024584103  | -0.40454515  |
| 0 | 0            | 0 | 0            | 0 | 0            | 0.03709471   | 0            | -0.41662754  |
| 0 | 0            | 0 | 0            | 0 | 0            | 0            | 0            | -0.39166946  |
| 0 | 0            | 0 | 0            | 0 | 0.031680017  | 0            | 0            | -0.38164956  |
| 0 | 0            | 0 | 0            | 0 | 0            | 0            | 0            | -0.39648352  |
| 0 | -0.10985166  | 0 | 0.004040299  | 0 | 0            | -0.020811119 | 0            | -0.2652666   |
| 0 | 0            | 0 | 0            | 0 | 0.0177925    | 0            | 0.016279692  | -0.029715493 |
| 0 | 0            | 0 | 0            | 0 | 0.024483918  | 0            | 0            | -0.030805328 |
| 0 | 0            | 0 | 0            | 0 | 0.018052365  | 0            | 0.016293823  | 0            |
| 0 | 0            | 0 | 0            | 0 | 0.016742252  | 0            | 0.015506032  | -0.029592303 |
| 0 | 0            | 0 | 0            | 0 | 0            | 0.026233809  | 0            | -0.030476568 |
| 0 | 0            | 0 | 0            | 0 | 0.019708328  | 0            | 0.022692507  | -0.02491872  |
| 0 | 0            | 0 | 0            | 0 | 0.024746813  | 0            | 0            | 0            |
| 0 | 0            | 0 | 0            | 0 | 0.017006362  | 0            | 0.015522584  | 0            |
| 0 | 0            | 0 | 0            | 0 | 0            | 0.026401316  | 0            | 0            |



|   |              |   |             |   |              |   |              |   |              |
|---|--------------|---|-------------|---|--------------|---|--------------|---|--------------|
| 0 | 0            | 0 | 0           | 0 | 0.019832624  | 0 | 0.022494107  | 0 | 0            |
| 0 | 0            | 0 | 0           | 0 | 0.018166284  | 0 | 0.019022538  | 0 | 0            |
| 0 | 0            | 0 | 0.041604213 | 0 | -0.038202863 | 0 | 0            | 0 | -0.37270794  |
| 0 | 0            | 0 | 0.042164193 | 0 | -0.042539868 | 0 | 0            | 0 | -0.37525547  |
| 0 | 0            | 0 | 0.042210023 | 0 | -0.042823756 | 0 | 0.004405295  | 0 | -0.37707772  |
| 0 | 0            | 0 | 0.04099045  | 0 | -0.040241306 | 0 | 0            | 0 | -0.37519064  |
| 0 | 0            | 0 | 0.041019318 | 0 | -0.040200589 | 0 | 0.004421509  | 0 | -0.3768178   |
| 0 | 0            | 0 | 0.041801434 | 0 | -0.041394522 | 0 | 0            | 0 | -0.018378969 |
| 0 | 0            | 0 | 0.041797021 | 0 | -0.040149698 | 0 | 0.00269614   | 0 | -0.016810207 |
| 0 | 0            | 0 | 0.017659482 | 0 | 0            | 0 | -0.01427798  | 0 | -0.363083    |
| 0 | 0            | 0 | 0.042383425 | 0 | -0.041535273 | 0 | 0            | 0 | 0            |
| 0 | 0            | 0 | 0.04238481  | 0 | -0.040560847 | 0 | 0.002604397  | 0 | 0            |
| 0 | 0            | 0 | 0.042271178 | 0 | -0.041990964 | 0 | -0.000523192 | 0 | -0.01813516  |
| 0 | 0            | 0 | 0.017975736 | 0 | 0            | 0 | -0.014423681 | 0 | -0.36304289  |
| 0 | 0            | 0 | 0.041089893 | 0 | -0.039555435 | 0 | -0.000745415 | 0 | -0.018280608 |
| 0 | 0            | 0 | 0.017919473 | 0 | 0            | 0 | -0.015306625 | 0 | -0.36242747  |
| 0 | 0            | 0 | 0.042857683 | 0 | -0.042232342 | 0 | -0.000348344 | 0 | 0            |
| 0 | 0            | 0 | 0.012009442 | 0 | 0            | 0 | 0            | 0 | -0.37400588  |
| 0 | 0            | 0 | 0.041678447 | 0 | -0.039800548 | 0 | -0.000573392 | 0 | 0            |
| 0 | 0            | 0 | 0.045428918 | 0 | -0.043590577 | 0 | 0.002130965  | 0 | 0            |
| 0 | 0            | 0 | 0           | 0 | -0.005470974 | 0 | 0            | 0 | -0.3840768   |
| 0 | 0            | 0 | 0           | 0 | -0.00549958  | 0 | 0.004349355  | 0 | -0.38580149  |
| 0 | 0            | 0 | 0           | 0 | 0            | 0 | -0.002880989 | 0 | -0.38000553  |
| 0 | 0            | 0 | 0           | 0 | -0.005517414 | 0 | 0.001316391  | 0 | -0.3850639   |
| 0 | 0            | 0 | 0           | 0 | -0.006746144 | 0 | 0.001281625  | 0 | -0.38539038  |
| 0 | 0            | 0 | 0.018765258 | 0 | 0            | 0 | -0.016297031 | 0 | -0.020983355 |
| 0 | 0            | 0 | 0.019213527 | 0 | 0            | 0 | -0.016246674 | 0 | 0            |
| 0 | 0            | 0 | 0           | 0 | -0.004730845 | 0 | -0.00072329  | 0 | -0.025887934 |
| 0 | 0            | 0 | 0           | 0 | -0.004375758 | 0 | -0.000642926 | 0 | 0            |
| 0 | 0            | 0 | 0           | 0 | 0.049137084  | 0 | -0.017030912 | 0 | -0.38457641  |
| 0 | 0            | 0 | 0           | 0 | 0.12318021   | 0 | 0.12632222   | 0 | -0.54302706  |
| 0 | 0            | 0 | 0           | 0 | 0.12325476   | 0 | 0.12605795   | 0 | -0.54306309  |
| 0 | -0.025905968 | 0 | 0           | 0 | 0.12192137   | 0 | 0.12017098   | 0 | -0.51657476  |
| 0 | 0            | 0 | 0.01674182  | 0 | 0.1248147    | 0 | 0.11883493   | 0 | -0.53844085  |
| 0 | 0            | 0 | 0           | 0 | 0.14051854   | 0 | 0.1205259    | 0 | -0.54365732  |
| 0 | -0.040472682 | 0 | 0.02262855  | 0 | 0.073279688  | 0 | 0.11821142   | 0 | 0            |
| 0 | -0.040195615 | 0 | 0.022944335 | 0 | 0.073366098  | 0 | 0.11787289   | 0 | 0            |
| 0 | -0.025086566 | 0 | 0           | 0 | 0.10633571   | 0 | 0.11998038   | 0 | -0.028236678 |
| 0 | 0            | 0 | 0.019778212 | 0 | 0.10455006   | 0 | 0.11886684   | 0 | -0.048604624 |
| 0 | 0            | 0 | 0.0201264   | 0 | 0.10410629   | 0 | 0.11862694   | 0 | -0.048509823 |
| 0 | -0.024554746 | 0 | 0           | 0 | 0.10698175   | 0 | 0.11965078   | 0 | -0.028710471 |
| 0 | -0.031641923 | 0 | 0           | 0 | 0.10158137   | 0 | 0.11962358   | 0 | 0            |
| 0 | -0.037705886 | 0 | 0.038632886 | 0 | 0.079211559  | 0 | 0.11200792   | 0 | 0            |
| 0 | -0.031127631 | 0 | 0           | 0 | 0.10227392   | 0 | 0.11927235   | 0 | 0            |
| 0 | -0.042972099 | 0 | 0           | 0 | 0.093482718  | 0 | 0.11969938   | 0 | 0            |
| 0 | -0.043081431 | 0 | 0           | 0 | 0.093415709  | 0 | 0.11959398   | 0 | 0            |
| 0 | 0            | 0 | 0           | 0 | 0.1240606    | 0 | 0.12031266   | 0 | -0.052584482 |

|   |              |   |             |   |              |   |              |   |              |
|---|--------------|---|-------------|---|--------------|---|--------------|---|--------------|
| 0 | 0            | 0 | 0           | 0 | 0.12353518   | 0 | 0.12016685   | 0 | -0.052545529 |
| 0 | -0.042759927 | 0 | 0           | 0 | 0.094056487  | 0 | 0.11930234   | 0 | 0            |
| 0 | 0            | 0 | 0.02075309  | 0 | 0.10339803   | 0 | 0.11816148   | 0 | 0            |
| 0 | 0            | 0 | 0           | 0 | 0.12415166   | 0 | 0.12002105   | 0 | -0.052546699 |
| 0 | 0            | 0 | 0.021097355 | 0 | 0.10295188   | 0 | 0.11791991   | 0 | 0            |
| 0 | 0            | 0 | 0.036867369 | 0 | 0.1081531    | 0 | 0.1123689    | 0 | -0.044576215 |
| 0 | -0.027000568 | 0 | 0.017831672 | 0 | 0.10532783   | 0 | 0.11251079   | 0 | -0.021979716 |
| 0 | -0.041672739 | 0 | 0.071609254 | 0 | 0            | 0 | 0.11909258   | 0 | 0            |
| 0 | -0.033480715 | 0 | 0.018869684 | 0 | 0.099499758  | 0 | 0.11221098   | 0 | 0            |
| 0 | -0.041269904 | 0 | 0.071775172 | 0 | 0            | 0 | 0.11876828   | 0 | 0            |
| 0 | 0            | 0 | 0           | 0 | 0.12385021   | 0 | 0.1196076    | 0 | 0            |
| 0 | -0.025837081 | 0 | 0           | 0 | 0.12279101   | 0 | 0.11420023   | 0 | -0.026743791 |
| 0 | 0            | 0 | 0.038460242 | 0 | 0.1064529    | 0 | 0.11170826   | 0 | 0            |
| 0 | 0            | 0 | 0           | 0 | 0.12332718   | 0 | 0.1194625    | 0 | 0            |
| 0 | 0            | 0 | 0           | 0 | 0.12394248   | 0 | 0.11931695   | 0 | 0            |
| 0 | -0.032418048 | 0 | 0           | 0 | 0.11782968   | 0 | 0.1139041    | 0 | 0            |
| 0 | 0            | 0 | 0.054707137 | 0 | 0.071220815  | 0 | 0.1169715    | 0 | 0            |
| 0 | 0            | 0 | 0.054812965 | 0 | 0.071074116  | 0 | 0.11671623   | 0 | 0            |
| 0 | -0.060764005 | 0 | 0.04778978  | 0 | 0            | 0 | 0.11952757   | 0 | 0            |
| 0 | -0.059757661 | 0 | 0.048241761 | 0 | 0            | 0 | 0.11923768   | 0 | 0            |
| 0 | -0.056658169 | 0 | 0.048603642 | 0 | 0            | 0 | 0.11949778   | 0 | 0.013548787  |
| 0 | -0.055582754 | 0 | 0.049055418 | 0 | 0            | 0 | 0.11923357   | 0 | 0.01261604   |
| 0 | -0.048738176 | 0 | 0.050040172 | 0 | 0            | 0 | 0.11999645   | 0 | 0            |
| 0 | 0            | 0 | 0.021882695 | 0 | 0.099393001  | 0 | 0.13193826   | 0 | -0.51593335  |
| 0 | 0            | 0 | 0.022310972 | 0 | 0.098486036  | 0 | 0.13177561   | 0 | -0.51592492  |
| 0 | -0.025634306 | 0 | 0           | 0 | 0.1028007    | 0 | 0.13326725   | 0 | -0.49579551  |
| 0 | -0.025008757 | 0 | 0           | 0 | 0.10314357   | 0 | 0.13302601   | 0 | -0.49655814  |
| 0 | 0            | 0 | 0.089083196 | 0 | 0            | 0 | 0.11959272   | 0 | -0.033580138 |
| 0 | 0            | 0 | 0.088763716 | 0 | 0            | 0 | 0.11939652   | 0 | -0.033643233 |
| 0 | 0            | 0 | 0.030334698 | 0 | 0.091146382  | 0 | 0.11719855   | 0 | 0            |
| 0 | 0            | 0 | 0.089694401 | 0 | 0            | 0 | 0.11904441   | 0 | 0            |
| 0 | 0            | 0 | 0.089380224 | 0 | 0            | 0 | 0.11884738   | 0 | 0            |
| 0 | -0.059945423 | 0 | 0.078720572 | 0 | 0            | 0 | 0.10981743   | 0 | 0            |
| 0 | 0            | 0 | 0           | 0 | 0.12003586   | 0 | 0.13354662   | 0 | -0.52245422  |
| 0 | 0            | 0 | 0           | 0 | 0.12047314   | 0 | 0.13345996   | 0 | -0.52242553  |
| 0 | -0.07066038  | 0 | 0.054921264 | 0 | 0            | 0 | 0.11507694   | 0 | -0.45577403  |
| 0 | 0            | 0 | 0           | 0 | 0.12013287   | 0 | 0.13326204   | 0 | -0.52254474  |
| 0 | 0            | 0 | 0.064157423 | 0 | 0            | 0 | 0.12673842   | 0 | -0.52588673  |
| 0 | 0            | 0 | 0.064250134 | 0 | 0            | 0 | 0.12683989   | 0 | -0.52588655  |
| 0 | -0.055938327 | 0 | 0.080262487 | 0 | 0            | 0 | 0.10944185   | 0 | 0.02010984   |
| 0 | -0.02772449  | 0 | 0.019767898 | 0 | 0.10130995   | 0 | 0.12517761   | 0 | -0.48796211  |
| 0 | 0            | 0 | 0.034010344 | 0 | 0.10872496   | 0 | 0.12526473   | 0 | -0.51218823  |
| 0 | 0            | 0 | 0.03703313  | 0 | -0.004267132 | 0 | -0.047574453 | 0 | -0.34511139  |
| 0 | -0.02705546  | 0 | 0           | 0 | 0.11995415   | 0 | 0.12687181   | 0 | -0.49451355  |
| 0 | 0            | 0 | 0.10580943  | 0 | 0            | 0 | 0.11426504   | 0 | -0.51508396  |
| 0 | -0.079284412 | 0 | 0           | 0 | 0            | 0 | 0.13107974   | 0 | -0.46337612  |
| 0 | 0            | 0 | 0           | 0 | 0.12074338   | 0 | 0.11913146   | 0 | 0            |

|   |              |   |             |   |             |            |            |              |
|---|--------------|---|-------------|---|-------------|------------|------------|--------------|
| 0 | 0            | 0 | 0.093377608 | 0 | 0           | 0.11825516 | 0          | 0            |
| 0 | -0.027146425 | 0 | 0.036946487 | 0 | 0.068069029 | 0          | 0.12540418 | 0            |
| 0 | -0.026914562 | 0 | 0.037215719 | 0 | 0.067741658 | 0          | 0.12513666 | 0            |
| 0 | -0.078418054 | 0 | 0           | 0 | 0           | 0.13075341 | 0          | -0.46435812  |
| 0 | -0.032985522 | 0 | 0.023816264 | 0 | 0.075037769 | 0          | 0.12527849 | 0            |
| 0 | -0.029529187 | 0 | 0.023517387 | 0 | 0.077370085 | 0          | 0.12542692 | 0            |
| 0 | -0.026806733 | 0 | 0.022905782 | 0 | 0.080373418 | 0          | 0.12553173 | 0            |
| 0 | -0.026134232 | 0 | 0.023281507 | 0 | 0.0801941   | 0          | 0.12531078 | 0            |
| 0 | -0.032332133 | 0 | 0.024182851 | 0 | 0.074906434 | 0          | 0.12503484 | 0            |
| 0 | -0.05530735  | 0 | 0.048844246 | 0 | 0           | 0.13217592 | 0          | -0.4523574   |
| 0 | -0.054047413 | 0 | 0.049240541 | 0 | 0           | 0.13196595 | 0          | -0.45370857  |
| 0 | 0            | 0 | 0.037345959 | 0 | 0.086634315 | 0          | 0.12572782 | 0            |
| 0 | 0            | 0 | 0.037548731 | 0 | 0.085994439 | 0          | 0.12554001 | 0            |
| 0 | 0            | 0 | 0.038878786 | 0 | 0.085061779 | 0          | 0.12515232 | 0            |
| 0 | 0            | 0 | 0.039080556 | 0 | 0.084428849 | 0          | 0.12496388 | 0            |
| 0 | 0            | 0 | 0.022604293 | 0 | 0.098535249 | 0          | 0.1258446  | 0            |
| 0 | -0.026259856 | 0 | 0           | 0 | 0.10270995  | 0          | 0.12703612 | 0            |
| 0 | -0.025897138 | 0 | 0           | 0 | 0.10282232  | 0          | 0.12716848 | 0            |
| 0 | -0.032296559 | 0 | 0           | 0 | 0.098070096 | 0          | 0.12680053 | 0            |
| 0 | -0.032539227 | 0 | 0           | 0 | 0.098162939 | 0          | 0.12676909 | 0            |
| 0 | -0.032183173 | 0 | 0           | 0 | 0.098347224 | 0          | 0.12690346 | 0            |
| 0 | -0.02565991  | 0 | 0           | 0 | 0.10299175  | 0          | 0.12678118 | 0            |
| 0 | -0.031960582 | 0 | 0           | 0 | 0.098489387 | 0          | 0.12648946 | 0            |
| 0 | 0            | 0 | 0.02347207  | 0 | 0.097532319 | 0          | 0.12522614 | 0            |
| 0 | 0            | 0 | 0.085305948 | 0 | 0           | 0.13260055 | 0          | -0.49874498  |
| 0 | 0            | 0 | 0.08581122  | 0 | 0           | 0.13274215 | 0          | -0.49843502  |
| 0 | -0.032723878 | 0 | 0.035234619 | 0 | 0.084735001 | 0          | 0.11880281 | 0            |
| 0 | -0.026636419 | 0 | 0.034016618 | 0 | 0.090423215 | 0          | 0.11895613 | 0            |
| 0 | -0.050214423 | 0 | 0.06641841  | 0 | 0           | 0.12594855 | 0          | 0            |
| 0 | 0            | 0 | 0           | 0 | 0.12047124  | 0          | 0.12735502 | 0            |
| 0 | -0.049298952 | 0 | 0.066625241 | 0 | 0           | 0.12567599 | 0          | 0            |
| 0 | 0            | 0 | 0.047849387 | 0 | 0.075111647 | 0          | 0.12383649 | 0            |
| 0 | 0            | 0 | 0.064430439 | 0 | 0           | 0.12082988 | 0          | -0.037319225 |
| 0 | -0.046015328 | 0 | 0.067639882 | 0 | 0           | 0.12588387 | 0          | 0.024093555  |
| 0 | -0.045039347 | 0 | 0.067832914 | 0 | 0           | 0.12563711 | 0          | 0.023087311  |
| 0 | 0            | 0 | 0           | 0 | 0.12032044  | 0          | 0.1267412  | 0            |
| 0 | 0            | 0 | 0.06488617  | 0 | 0           | 0.12023462 | 0          | 0            |
| 0 | -0.031192923 | 0 | 0.071440566 | 0 | 0           | 0.12708569 | 0          | 0            |
| 0 | -0.083544886 | 0 | 0           | 0 | 0           | 0.12488264 | 0          | 0            |
| 0 | -0.083003983 | 0 | 0           | 0 | 0           | 0.12509943 | 0          | 0            |
| 0 | -0.057144878 | 0 | 0.077226529 | 0 | 0           | 0.12220907 | 0          | -0.44187669  |
| 0 | -0.082737582 | 0 | 0           | 0 | 0           | 0.1245119  | 0          | 0            |
| 0 | -0.079291931 | 0 | 0           | 0 | 0           | 0.12499012 | 0          | 0.027059796  |
| 0 | -0.079899138 | 0 | 0           | 0 | 0           | 0.12476642 | 0          | 0.027689375  |
| 0 | -0.058785697 | 0 | 0.048474541 | 0 | 0           | 0.12627602 | 0          | 0            |
| 0 | -0.079024607 | 0 | 0           | 0 | 0           | 0.12441614 | 0          | 0.026895973  |
| 0 | -0.054760839 | 0 | 0.049286013 | 0 | 0           | 0.12616448 | 0          | 0.02864756   |

|   |              |   |             |   |             |            |   |              |
|---|--------------|---|-------------|---|-------------|------------|---|--------------|
| 0 | -0.064975799 | 0 | 0           | 0 | 0           | 0.12610096 | 0 | 0            |
| 0 | 0            | 0 | 0.06423805  | 0 | 0           | 0.13343229 | 0 | -0.50655305  |
| 0 | 0            | 0 | 0.085831368 | 0 | 0           | 0.12674324 | 0 | -0.016391731 |
| 0 | 0            | 0 | 0.08645251  | 0 | 0           | 0.12628952 | 0 | 0            |
| 0 | -0.10054498  | 0 | 0           | 0 | 0           | 0.11917453 | 0 | -0.44350044  |
| 0 | -0.078779385 | 0 | 0           | 0 | 0           | 0.1373584  | 0 | -0.44421732  |
| 0 | -0.077793366 | 0 | 0           | 0 | 0           | 0.13789545 | 0 | -0.44520687  |
| 0 | -0.077670193 | 0 | 0           | 0 | 0           | 0.13705621 | 0 | -0.44559249  |
| 0 | 0            | 0 | 0.043202292 | 0 | 0.10093134  | 0          | 0 | -0.41682372  |
| 0 | -0.026719041 | 0 | 0.023787912 | 0 | 0.098635559 | 0          | 0 | -0.3944501   |
| 0 | 0            | 0 | 0.024595547 | 0 | 0.10774396  | 0          | 0 | -0.41867142  |
| 0 | 0            | 0 | 0.024750126 | 0 | 0.10760798  | 0          | 0 | -0.41877714  |
| 0 | -0.025262856 | 0 | 0           | 0 | 0.11417621  | 0          | 0 | -0.39859818  |
| 0 | -0.025062132 | 0 | 0           | 0 | 0.11475443  | 0          | 0 | -0.39907879  |
| 0 | -0.025641003 | 0 | 0           | 0 | 0.12136787  | 0          | 0 | -0.40093164  |
| 0 | -0.036104673 | 0 | 0.046416929 | 0 | 0.063539953 | 0          | 0 | 0            |
| 0 | -0.035988409 | 0 | 0.046439453 | 0 | 0.063979997 | 0          | 0 | 0            |
| 0 | -0.024904113 | 0 | 0.042798704 | 0 | 0.084135704 | 0          | 0 | -0.018271793 |
| 0 | 0            | 0 | 0           | 0 | 0.13183402  | 0          | 0 | -0.42470241  |
| 0 | 0            | 0 | 0           | 0 | 0.13175186  | 0          | 0 | -0.42476663  |
| 0 | -0.029916808 | 0 | 0.043779194 | 0 | 0.07947917  | 0          | 0 | 0            |
| 0 | 0            | 0 | 0           | 0 | 0.13207921  | 0          | 0 | -0.42491534  |
| 0 | 0            | 0 | 0.044892266 | 0 | 0.090528895 | 0          | 0 | -0.042393617 |
| 0 | 0            | 0 | 0.044927852 | 0 | 0.090601126 | 0          | 0 | -0.042364925 |
| 0 | -0.026440954 | 0 | 0.025338329 | 0 | 0.088806875 | 0          | 0 | -0.020425715 |
| 0 | -0.026162216 | 0 | 0.025451755 | 0 | 0.089104731 | 0          | 0 | -0.020649353 |
| 0 | -0.031479378 | 0 | 0.026127059 | 0 | 0.084371015 | 0          | 0 | 0            |
| 0 | -0.03121292  | 0 | 0.026234007 | 0 | 0.084702063 | 0          | 0 | 0            |
| 0 | 0            | 0 | 0.046123404 | 0 | 0.089198978 | 0          | 0 | 0            |
| 0 | -0.039252636 | 0 | 0.027250856 | 0 | 0.077783557 | 0          | 0 | 0            |
| 0 | 0            | 0 | 0.046159749 | 0 | 0.089266903 | 0          | 0 | 0            |
| 0 | -0.082037068 | 0 | 0           | 0 | 0           | 0.13150776 | 0 | 0            |
| 0 | 0            | 0 | 0.024794306 | 0 | 0.1075151   | 0          | 0 | -0.046143703 |
| 0 | -0.025733097 | 0 | 0           | 0 | 0.11420148  | 0          | 0 | -0.026135811 |
| 0 | -0.025472055 | 0 | 0           | 0 | 0.11417415  | 0          | 0 | -0.026403351 |
| 0 | -0.078479328 | 0 | 0           | 0 | 0           | 0.13129957 | 0 | 0.043152744  |
| 0 | -0.025267506 | 0 | 0           | 0 | 0.11475009  | 0          | 0 | -0.026569022 |
| 0 | 0            | 0 | 0.025544941 | 0 | 0.10658331  | 0          | 0 | 0            |
| 0 | -0.030864198 | 0 | 0           | 0 | 0.11050351  | 0          | 0 | 0            |
| 0 | -0.03061693  | 0 | 0           | 0 | 0.11040212  | 0          | 0 | 0            |
| 0 | -0.030425686 | 0 | 0           | 0 | 0.11100938  | 0          | 0 | 0            |
| 0 | -0.053284394 | 0 | 0.083164482 | 0 | 0           | 0          | 0 | -0.35377365  |
| 0 | 0            | 0 | 0           | 0 | 0           | 0.13611463 | 0 | -0.54834875  |
| 0 | -0.042380863 | 0 | 0           | 0 | 0.10220122  | 0          | 0 | 0            |
| 0 | 0            | 0 | 0           | 0 | 0           | 0.13563887 | 0 | -0.54836862  |
| 0 | -0.049722481 | 0 | 0.076262622 | 0 | 0           | 0          | 0 | 0            |
| 0 | -0.04928668  | 0 | 0.076475152 | 0 | 0           | 0          | 0 | 0            |

|   |              |   |             |   |              |   |             |   |              |
|---|--------------|---|-------------|---|--------------|---|-------------|---|--------------|
| 0 | 0            | 0 | 0           | 0 | 0.13203331   | 0 | 0           | 0 | -0.051085411 |
| 0 | -0.046387379 | 0 | 0.07725125  | 0 | 0            | 0 | 0           | 0 | 0.010009271  |
| 0 | 0            | 0 | 0           | 0 | 0            | 0 | 0.13587341  | 0 | -0.54842166  |
| 0 | -0.045908653 | 0 | 0.077454667 | 0 | 0            | 0 | 0           | 0 | 0.009614118  |
| 0 | -0.040467394 | 0 | 0.078877553 | 0 | 0            | 0 | 0           | 0 | 0            |
| 0 | -0.058078948 | 0 | 0.05446682  | 0 | 0            | 0 | 0           | 0 | -0.35004059  |
| 0 | 0            | 0 | 0           | 0 | 0.13183297   | 0 | 0           | 0 | 0            |
| 0 | -0.057331184 | 0 | 0.054760712 | 0 | 0            | 0 | 0           | 0 | -0.35091546  |
| 0 | 0            | 0 | 0.095755034 | 0 | 0            | 0 | 0           | 0 | -0.39881731  |
| 0 | 0            | 0 | 0.096046188 | 0 | 0            | 0 | 0           | 0 | -0.39864178  |
| 0 | 0            | 0 | 0.059501597 | 0 | 0.074570312  | 0 | 0           | 0 | 0            |
| 0 | -0.060964107 | 0 | 0.053947687 | 0 | 0            | 0 | 0           | 0 | 0            |
| 0 | -0.057826725 | 0 | 0.054561489 | 0 | 0            | 0 | 0           | 0 | 0.017357313  |
| 0 | 0            | 0 | 0.095881481 | 0 | 0            | 0 | 0           | 0 | -0.030740741 |
| 0 | 0            | 0 | 0.096339578 | 0 | 0            | 0 | 0           | 0 | 0            |
| 0 | 0            | 0 | 0           | 0 | 0            | 0 | 0.12973912  | 0 | -0.047620086 |
| 0 | 0            | 0 | 0           | 0 | 0            | 0 | 0.12907244  | 0 | 0            |
| 0 | -0.027331633 | 0 | 0.028478057 | 0 | 0.082645745  | 0 | 0           | 0 | -0.35883267  |
| 0 | -0.026978408 | 0 | 0.028675094 | 0 | 0.082491056  | 0 | 0           | 0 | -0.35929341  |
| 0 | -0.026491043 | 0 | 0.040610037 | 0 | 0.082875924  | 0 | 0           | 0 | -0.35924631  |
| 0 | 0            | 0 | 0.070769566 | 0 | 0            | 0 | 0           | 0 | -0.40526115  |
| 0 | 0            | 0 | 0.043014764 | 0 | 0.088817355  | 0 | 0           | 0 | -0.38248679  |
| 0 | 0            | 0 | 0.042894565 | 0 | 0.089295854  | 0 | 0           | 0 | -0.3824057   |
| 0 | 0            | 0 | 0           | 0 | 0            | 0 | 0.14228364  | 0 | -0.52900863  |
| 0 | 0            | 0 | 0.028085976 | 0 | 0.10144227   | 0 | 0           | 0 | -0.38706124  |
| 0 | -0.026914827 | 0 | 0           | 0 | 0.11012902   | 0 | 0           | 0 | -0.36608591  |
| 0 | -0.026632639 | 0 | 0           | 0 | 0.11029395   | 0 | 0           | 0 | -0.36656469  |
| 0 | -0.026334662 | 0 | 0           | 0 | 0.11088982   | 0 | 0           | 0 | -0.36650737  |
| 0 | -0.030614959 | 0 | 0.043364191 | 0 | 0.067501305  | 0 | 0           | 0 | 0            |
| 0 | -0.030279565 | 0 | 0.04345849  | 0 | 0.067517874  | 0 | 0           | 0 | 0            |
| 0 | -0.026084507 | 0 | 0.042478586 | 0 | 0.071612321  | 0 | 0           | 0 | 0.003004003  |
| 0 | -0.024111864 | 0 | 0.042182699 | 0 | 0.073051748  | 0 | 0           | 0 | 0            |
| 0 | -0.025734615 | 0 | 0.042578465 | 0 | 0.071594702  | 0 | 0           | 0 | 0.002648582  |
| 0 | -0.03207834  | 0 | 0.029393003 | 0 | 0.078143791  | 0 | 0           | 0 | 0            |
| 0 | -0.027465407 | 0 | 0.028733905 | 0 | 0.082085054  | 0 | 0           | 0 | 0.001385183  |
| 0 | -0.047233589 | 0 | 0.07423726  | 0 | 0            | 0 | 0           | 0 | -0.32517844  |
| 0 | -0.046546924 | 0 | 0.074315075 | 0 | 0            | 0 | 0           | 0 | -0.32608859  |
| 0 | 0            | 0 | 0           | 0 | 0.12855385   | 0 | 0           | 0 | -0.3937204   |
| 0 | 0            | 0 | 0.04336442  | 0 | 0.088538439  | 0 | 0           | 0 | -0.022017629 |
| 0 | 0            | 0 | 0.044505493 | 0 | 0.087317316  | 0 | 0           | 0 | 0            |
| 0 | -0.080894977 | 0 | 0.088997283 | 0 | -0.075311475 | 0 | 0.062854017 | 0 | 0            |
| 0 | -0.08436238  | 0 | 0           | 0 | 0            | 0 | 0           | 0 | -0.33539319  |
| 0 | -0.083885138 | 0 | 0           | 0 | 0            | 0 | 0           | 0 | -0.3356849   |
| 0 | -0.083726677 | 0 | 0           | 0 | 0            | 0 | 0           | 0 | -0.33635702  |
| 0 | -0.080161351 | 0 | 0.089755664 | 0 | -0.076218649 | 0 | 0.061789682 | 0 | 0            |
| 0 | -0.077263925 | 0 | 0.088958881 | 0 | -0.073363785 | 0 | 0.061314117 | 0 | 0.063358447  |
| 0 | -0.027135334 | 0 | 0           | 0 | 0.10993912   | 0 | 0           | 0 | -0.004359474 |

|   |              |   |             |   |              |   |             |   |              |
|---|--------------|---|-------------|---|--------------|---|-------------|---|--------------|
| 0 | -0.031848597 | 0 | 0           | 0 | 0.10655428   | 0 | 0           | 0 | 0            |
| 0 | -0.076510454 | 0 | 0.089722864 | 0 | -0.074300336 | 0 | 0.060267155 | 0 | 0.062731275  |
| 0 | -0.049965504 | 0 | 0.073437877 | 0 | 0            | 0 | 0           | 0 | 0            |
| 0 | -0.045940648 | 0 | 0.095684584 | 0 | -0.070699231 | 0 | 0.041482337 | 0 | 0            |
| 0 | -0.0562594   | 0 | 0.055645836 | 0 | 0            | 0 | 0           | 0 | -0.32210144  |
| 0 | -0.072865281 | 0 | 0.086433526 | 0 | -0.053141482 | 0 | 0           | 0 | 0            |
| 0 | -0.046891025 | 0 | 0.074314543 | 0 | 0            | 0 | 0           | 0 | 0.030197151  |
| 0 | -0.045366277 | 0 | 0.096404134 | 0 | -0.071711076 | 0 | 0.040678411 | 0 | 0            |
| 0 | -0.072524387 | 0 | 0.087094899 | 0 | -0.054080693 | 0 | 0           | 0 | 0            |
| 0 | -0.086926211 | 0 | 0           | 0 | 0            | 0 | 0           | 0 | 0            |
| 0 | -0.069924254 | 0 | 0.086685523 | 0 | -0.052437784 | 0 | 0           | 0 | 0.044084867  |
| 0 | -0.069554801 | 0 | 0.087353924 | 0 | -0.053398475 | 0 | 0           | 0 | 0.044028489  |
| 0 | -0.084209469 | 0 | 0           | 0 | 0            | 0 | 0           | 0 | 0.033581951  |
| 0 | 0            | 0 | 0.093019105 | 0 | 0            | 0 | 0           | 0 | -0.36848127  |
| 0 | -0.043703275 | 0 | 0.08882979  | 0 | -0.046840025 | 0 | 0           | 0 | 0            |
| 0 | -0.060058768 | 0 | 0.052836439 | 0 | 0            | 0 | 0           | 0 | -0.31931987  |
| 0 | -0.059791739 | 0 | 0.053016011 | 0 | 0            | 0 | 0           | 0 | -0.31973921  |
| 0 | -0.038250779 | 0 | 0.089717305 | 0 | -0.057914983 | 0 | 0.051505565 | 0 | 0            |
| 0 | -0.060941832 | 0 | 0.04898534  | 0 | 0            | 0 | 0.025851034 | 0 | -0.3314154   |
| 0 | -0.062185525 | 0 | 0.076998214 | 0 | -0.029645169 | 0 | 0           | 0 | -0.30396167  |
| 0 | -0.061831753 | 0 | 0.077666682 | 0 | -0.030818496 | 0 | 0           | 0 | -0.30457795  |
| 0 | -0.060450822 | 0 | 0.049439695 | 0 | 0            | 0 | 0.024321092 | 0 | -0.33105318  |
| 0 | -0.08413864  | 0 | 0.092973185 | 0 | -0.050828929 | 0 | 0           | 0 | -0.30301522  |
| 0 | -0.095789207 | 0 | 0.098371535 | 0 | -0.0692556   | 0 | 0.029436669 | 0 | 0            |
| 0 | -0.064529283 | 0 | 0.048790489 | 0 | 0            | 0 | 0.014669045 | 0 | 0            |
| 0 | -0.061497706 | 0 | 0.049683825 | 0 | 0            | 0 | 0.014017299 | 0 | 0.035703239  |
| 0 | -0.063229451 | 0 | 0.052455353 | 0 | 0            | 0 | 0           | 0 | 0            |
| 0 | -0.064134316 | 0 | 0.049320552 | 0 | 0            | 0 | 0.013337976 | 0 | 0            |
| 0 | -0.089758996 | 0 | 0.093486763 | 0 | -0.059461677 | 0 | 0.040620614 | 0 | -0.31978272  |
| 0 | -0.092525103 | 0 | 0.098418008 | 0 | -0.067321801 | 0 | 0.027538837 | 0 | 0.074264096  |
| 0 | -0.060320244 | 0 | 0.053156336 | 0 | 0            | 0 | 0           | 0 | 0.033781716  |
| 0 | -0.064897873 | 0 | 0.077014118 | 0 | -0.030547074 | 0 | 0           | 0 | 0            |
| 0 | -0.061075348 | 0 | 0.050201061 | 0 | 0            | 0 | 0.012689518 | 0 | 0.035609594  |
| 0 | -0.057482903 | 0 | 0.0566713   | 0 | 0            | 0 | 0           | 0 | -0.31098337  |
| 0 | -0.063922171 | 0 | 0.048981522 | 0 | 0            | 0 | 0.024183538 | 0 | 0            |
| 0 | -0.061973994 | 0 | 0.077228705 | 0 | -0.029809226 | 0 | 0           | 0 | 0.047061619  |
| 0 | 0            | 0 | 0.10687088  | 0 | -0.054118734 | 0 | 0.047826352 | 0 | -0.40142356  |
| 0 | 0            | 0 | 0.1074614   | 0 | -0.055839412 | 0 | 0.047260465 | 0 | -0.40131723  |
| 0 | -0.060821825 | 0 | 0.049882928 | 0 | 0            | 0 | 0.023766445 | 0 | 0.041155324  |
| 0 | -0.040680872 | 0 | 0.055171509 | 0 | 0            | 0 | 0.011366748 | 0 | 0            |
| 0 | 0            | 0 | 0.10418064  | 0 | -0.039825788 | 0 | 0           | 0 | -0.37352958  |
| 0 | 0            | 0 | 0.11166251  | 0 | -0.06020364  | 0 | 0.03548706  | 0 | -0.013337257 |
| 0 | 0            | 0 | 0.10468856  | 0 | -0.041257174 | 0 | 0           | 0 | -0.37364212  |
| 0 | 0            | 0 | 0.11238727  | 0 | -0.060528038 | 0 | 0.035765849 | 0 | 0            |
| 0 | 0            | 0 | 0.11216047  | 0 | -0.06163601  | 0 | 0.035008395 | 0 | -0.01317409  |
| 0 | 0            | 0 | 0.1148042   | 0 | -0.062814331 | 0 | 0.037441349 | 0 | 0            |
| 0 | 0            | 0 | 0.11288012  | 0 | -0.061945849 | 0 | 0.035294359 | 0 | 0            |

|   |              |   |             |   |              |             |             |              |
|---|--------------|---|-------------|---|--------------|-------------|-------------|--------------|
| 0 | -0.085280029 | 0 | 0           | 0 | 0            | 0.027119984 | 0           | -0.32971967  |
| 0 | -0.095641528 | 0 | 0           | 0 | -0.022773373 | 0           | 0.051149244 | -0.33448576  |
| 0 | -0.1018205   | 0 | 0           | 0 | -0.027987264 | 0           | 0.041172726 | 0            |
| 0 | -0.084917918 | 0 | 0           | 0 | 0            | 0.025767892 | 0           | -0.32934658  |
| 0 | -0.10557738  | 0 | 0.037676557 | 0 | -0.074302248 | 0           | 0.041008361 | -0.30747735  |
| 0 | -0.095114087 | 0 | 0           | 0 | -0.02310757  | 0           | 0.049689199 | -0.33440191  |
| 0 | -0.10458561  | 0 | 0.038576015 | 0 | -0.075536843 | 0           | 0.039940105 | -0.30793366  |
| 0 | -0.074724301 | 0 | 0.059696944 | 0 | 0            | 0.002544432 | 0           | -0.31184615  |
| 0 | -0.1012637   | 0 | 0           | 0 | -0.028033392 | 0           | 0.039815027 | 0            |
| 0 | -0.084562822 | 0 | 0           | 0 | 0            | 0.036706142 | 0           | -0.33078576  |
| 0 | 0            | 0 | 0.10628194  | 0 | -0.05282263  | 0           | 0.044746862 | -0.006322426 |
| 0 | 0            | 0 | 0.10427534  | 0 | -0.040205785 | 0           | 0           | -0.016604894 |
| 0 | 0            | 0 | 0.10712493  | 0 | -0.053364643 | 0           | 0.044875546 | 0            |
| 0 | -0.09834397  | 0 | 0           | 0 | -0.026217326 | 0           | 0.039560816 | 0.060380042  |
| 0 | -0.11126775  | 0 | 0.038082637 | 0 | -0.07953083  | 0           | 0.03269452  | 0            |
| 0 | 0            | 0 | 0.073341559 | 0 | 0            | 0.012009821 | 0           | -0.38160384  |
| 0 | 0            | 0 | 0.10489044  | 0 | -0.040346175 | 0           | 0           | 0            |
| 0 | -0.088530986 | 0 | 0           | 0 | -0.005295343 | 0           | 0           | -0.30894424  |
| 0 | -0.083262958 | 0 | 0           | 0 | 0            | 0           | 0           | -0.30705459  |
| 0 | -0.085892901 | 0 | 0           | 0 | 0            | 0           | 0           | -0.31025054  |
| 0 | 0            | 0 | 0.075583953 | 0 | 0            | 0           | 0           | -0.37242683  |
| 0 | -0.098955295 | 0 | 0.037365335 | 0 | -0.05832578  | 0           | 0           | -0.28760306  |
| 0 | -0.11019724  | 0 | 0.038969008 | 0 | -0.080460988 | 0           | 0.031787871 | 0            |
| 0 | 0            | 0 | 0.073300231 | 0 | 0            | 0.010822674 | 0           | -0.38083721  |
| 0 | -0.088243671 | 0 | 0           | 0 | 0            | 0.025393776 | 0           | 0            |
| 0 | -0.097770865 | 0 | 0           | 0 | -0.026283971 | 0           | 0.038222311 | 0.060056063  |
| 0 | -0.088390934 | 0 | 0           | 0 | -0.005922522 | 0           | 0           | -0.30939     |
| 0 | -0.098271127 | 0 | 0.038136481 | 0 | -0.059630136 | 0           | 0           | -0.28836633  |
| 0 | -0.09810122  | 0 | 0           | 0 | -0.022429281 | 0           | 0.049123969 | 0            |
| 0 | -0.10701693  | 0 | 0.038472687 | 0 | -0.074280827 | 0           | 0.039669525 | 0            |
| 0 | -0.10820887  | 0 | 0.037722562 | 0 | -0.077733437 | 0           | 0.030864386 | 0.07883181   |
| 0 | 0            | 0 | 0.072914818 | 0 | 0            | 0.020839232 | 0           | -0.38193129  |
| 0 | -0.085616622 | 0 | 0           | 0 | 0            | 0.024848123 | 0           | 0.049556194  |
| 0 | 0            | 0 | 0.094391731 | 0 | -0.02221125  | 0           | 0           | -0.36088965  |
| 0 | -0.11061526  | 0 | 0           | 0 | -0.04773212  | 0           | 0.033961996 | -0.31194311  |
| 0 | -0.10711691  | 0 | 0.038619405 | 0 | -0.078687409 | 0           | 0.029985819 | 0.07808888   |
| 0 | -0.094536147 | 0 | 0           | 0 | -0.020563174 | 0           | 0.047612003 | 0.0640045    |
| 0 | -0.10086064  | 0 | 0.038041717 | 0 | -0.059024003 | 0           | 0           | 0            |
| 0 | -0.10969211  | 0 | 0           | 0 | -0.047786202 | 0           | 0.032870611 | -0.31229965  |
| 0 | -0.10384572  | 0 | 0.038118188 | 0 | -0.072382149 | 0           | 0.037939053 | 0.079963312  |
| 0 | -0.091431308 | 0 | 0           | 0 | -0.005837193 | 0           | 0           | 0            |
| 0 | -0.10654106  | 0 | 0           | 0 | -0.042090255 | 0           | 0.040838719 | -0.31461329  |
| 0 | 0            | 0 | 0.073891764 | 0 | 0            | 0.009627629 | 0           | -0.017516562 |
| 0 | -0.089617729 | 0 | 0.037646255 | 0 | -0.042988044 | 0           | 0           | -0.28595358  |
| 0 | -0.088549667 | 0 | 0           | 0 | -0.005015535 | 0           | 0           | 0.049093028  |
| 0 | 0            | 0 | 0.074395657 | 0 | 0            | 0.009729724 | 0           | 0            |
| 0 | -0.098444695 | 0 | 0.037746707 | 0 | -0.058464382 | 0           | 0           | 0.067643085  |

|   |              |   |              |   |              |   |              |   |              |
|---|--------------|---|--------------|---|--------------|---|--------------|---|--------------|
| 0 | -0.11237453  | 0 | 0            | 0 | -0.046876251 | 0 | 0.032453713  | 0 | 0            |
| 0 | -0.10012861  | 0 | 0            | 0 | -0.026409452 | 0 | 0            | 0 | -0.29460433  |
| 0 | -0.080590073 | 0 | 0            | 0 | 0.008770226  | 0 | 0            | 0 | -0.30291056  |
| 0 | -0.062150534 | 0 | 0            | 0 | -0.011625385 | 0 | 0.028996648  | 0 | 0            |
| 0 | -0.10922574  | 0 | 0            | 0 | -0.045416858 | 0 | 0.030673281  | 0 | 0.07291925   |
| 0 | 0            | 0 | 0            | 0 | 0            | 0 | 0            | 0 | -0.42080787  |
| 0 | -0.08932813  | 0 | -0.002716593 | 0 | 0            | 0 | 0            | 0 | -0.29457318  |
| 0 | -0.089338499 | 0 | -0.002370209 | 0 | 0            | 0 | -0.000804661 | 0 | -0.29395818  |
| 0 | -0.088126519 | 0 | 0            | 0 | 0            | 0 | -0.00233898  | 0 | -0.29285813  |
| 0 | -0.088222959 | 0 | -0.001132069 | 0 | 0            | 0 | 0.003026829  | 0 | -0.29534122  |
| 0 | -0.088545373 | 0 | -0.001925137 | 0 | 0            | 0 | -0.00219203  | 0 | -0.29378328  |
| 0 | -0.11228518  | 0 | 0            | 0 | -0.007699715 | 0 | 0.016944467  | 0 | -0.3072201   |
| 0 | -0.091341744 | 0 | -0.001614524 | 0 | 0            | 0 | -0.00209568  | 0 | 0            |
| 0 | 0            | 0 | 0.11978837   | 0 | -0.037698192 | 0 | 0.007123505  | 0 | -0.3839837   |
| 0 | -0.062426018 | 0 | 0.032202135  | 0 | -0.058767694 | 0 | 0.014418825  | 0 | 0            |
| 0 | -0.088805944 | 0 | -0.001161206 | 0 | 0            | 0 | -0.002974432 | 0 | 0.05686174   |
| 0 | -0.12719897  | 0 | 0.034019162  | 0 | -0.058287848 | 0 | 0.001889587  | 0 | -0.26953055  |
| 0 | 0            | 0 | 0            | 0 | 0.015946877  | 0 | 0.019596365  | 0 | -0.40634394  |
| 0 | 0            | 0 | 0            | 0 | 0            | 0 | 0.028556075  | 0 | -0.41627381  |
| 0 | 0            | 0 | 0            | 0 | 0.01488729   | 0 | 0.018818694  | 0 | -0.40600116  |
| 0 | 0            | 0 | 0            | 0 | 0.024160441  | 0 | 0            | 0 | -0.3904129   |
| 0 | 0            | 0 | 0            | 0 | 0.017757561  | 0 | 0.0258738    | 0 | -0.4050632   |
| 0 | 0            | 0 | 0            | 0 | 0.016884159  | 0 | 0.016642708  | 0 | -0.029783538 |
| 0 | 0            | 0 | 0            | 0 | 0.017150687  | 0 | 0.016652523  | 0 | 0            |
| 0 | 0            | 0 | 0.041682854  | 0 | -0.041639897 | 0 | 0            | 0 | -0.37510478  |
| 0 | 0            | 0 | 0.041746134  | 0 | -0.042297477 | 0 | 0.00540147   | 0 | -0.37756927  |
| 0 | 0            | 0 | 0.042224189  | 0 | -0.043979444 | 0 | 0.002424242  | 0 | -0.37717141  |
| 0 | 0            | 0 | 0.041033156  | 0 | -0.0415203   | 0 | 0.00219376   | 0 | -0.37690913  |
| 0 | 0            | 0 | 0.041806179  | 0 | -0.041568716 | 0 | 0.000298005  | 0 | -0.018354074 |
| 0 | 0            | 0 | 0.017674434  | 0 | 0            | 0 | -0.014253078 | 0 | -0.36317468  |
| 0 | 0            | 0 | 0.042394483  | 0 | -0.041810774 | 0 | 0.000468089  | 0 | 0            |
| 0 | 0            | 0 | 0            | 0 | -0.006733338 | 0 | 0.002215964  | 0 | -0.38583754  |
| 0 | -0.024652728 | 0 | 0            | 0 | 0.10614438   | 0 | 0.12613702   | 0 | -0.51733249  |
| 0 | 0            | 0 | 0.01931013   | 0 | 0.10451185   | 0 | 0.1250477    | 0 | -0.53706987  |
| 0 | 0            | 0 | 0.019655262  | 0 | 0.10407667   | 0 | 0.12480828   | 0 | -0.53699307  |
| 0 | -0.024122272 | 0 | 0            | 0 | 0.10678904   | 0 | 0.12581256   | 0 | -0.51792888  |
| 0 | 0            | 0 | 0            | 0 | 0.12356802   | 0 | 0.12649184   | 0 | -0.54309059  |
| 0 | 0            | 0 | 0            | 0 | 0.12304239   | 0 | 0.12634411   | 0 | -0.54302643  |
| 0 | 0            | 0 | 0            | 0 | 0.12366122   | 0 | 0.12620215   | 0 | -0.54312293  |
| 0 | 0            | 0 | 0.03610066   | 0 | 0.10823989   | 0 | 0.11859679   | 0 | -0.53283725  |
| 0 | -0.026542389 | 0 | 0.017370524  | 0 | 0.10547754   | 0 | 0.11873381   | 0 | -0.51057736  |
| 0 | -0.025392739 | 0 | 0            | 0 | 0.12250467   | 0 | 0.12041206   | 0 | -0.51716836  |
| 0 | -0.037473872 | 0 | 0.041073522  | 0 | 0.059738996  | 0 | 0.11800677   | 0 | 0            |
| 0 | -0.037224943 | 0 | 0.041221842  | 0 | 0.060036817  | 0 | 0.11764209   | 0 | 0            |
| 0 | 0            | 0 | 0.03916248   | 0 | 0.08808488   | 0 | 0.11860831   | 0 | -0.044990416 |
| 0 | 0            | 0 | 0.039285247  | 0 | 0.087949629  | 0 | 0.11833543   | 0 | -0.044932041 |
| 0 | -0.025766607 | 0 | 0.02033637   | 0 | 0.086201834  | 0 | 0.11865715   | 0 | -0.023531269 |



|   |              |   |             |   |             |   |            |   |              |
|---|--------------|---|-------------|---|-------------|---|------------|---|--------------|
| 0 | -0.02519162  | 0 | 0.020631456 | 0 | 0.086414764 | 0 | 0.11835914 | 0 | -0.023994872 |
| 0 | -0.032258    | 0 | 0.021359572 | 0 | 0.080500799 | 0 | 0.11829419 | 0 | 0            |
| 0 | -0.031698896 | 0 | 0.021646467 | 0 | 0.080758279 | 0 | 0.11797644 | 0 | 0            |
| 0 | -0.040466813 | 0 | 0.022638985 | 0 | 0.073249676 | 0 | 0.11821447 | 0 | 0            |
| 0 | 0            | 0 | 0.040748994 | 0 | 0.086415454 | 0 | 0.11793419 | 0 | 0            |
| 0 | 0            | 0 | 0.040871884 | 0 | 0.086276521 | 0 | 0.11766346 | 0 | 0            |
| 0 | -0.024747129 | 0 | 0           | 0 | 0.10684184  | 0 | 0.12010154 | 0 | -0.028594597 |
| 0 | -0.056311033 | 0 | 0.04822088  | 0 | 0           | 0 | 0.12562818 | 0 | -0.47108444  |
| 0 | -0.025110162 | 0 | 0           | 0 | 0.1063619   | 0 | 0.11997345 | 0 | -0.028212781 |
| 0 | 0            | 0 | 0.019901863 | 0 | 0.10412545  | 0 | 0.11891182 | 0 | -0.048587109 |
| 0 | -0.055239131 | 0 | 0.048670477 | 0 | 0           | 0 | 0.12536711 | 0 | -0.47211308  |
| 0 | -0.024248316 | 0 | 0           | 0 | 0.1074729   | 0 | 0.11975466 | 0 | -0.02903275  |
| 0 | -0.024911529 | 0 | 0.036139563 | 0 | 0.091129821 | 0 | 0.11231444 | 0 | -0.020593441 |
| 0 | -0.031349125 | 0 | 0           | 0 | 0.10202195  | 0 | 0.11972599 | 0 | 0            |
| 0 | -0.031692639 | 0 | 0           | 0 | 0.10163888  | 0 | 0.11960919 | 0 | 0            |
| 0 | -0.031323495 | 0 | 0.037404193 | 0 | 0.085156663 | 0 | 0.11203016 | 0 | 0            |
| 0 | 0            | 0 | 0.088435436 | 0 | 0           | 0 | 0.12573301 | 0 | -0.51833702  |
| 0 | 0            | 0 | 0.088116705 | 0 | 0           | 0 | 0.12553822 | 0 | -0.51843664  |
| 0 | -0.030867524 | 0 | 0           | 0 | 0.10269526  | 0 | 0.11935793 | 0 | 0            |
| 0 | -0.043009155 | 0 | 0           | 0 | 0.093666063 | 0 | 0.11967061 | 0 | 0            |
| 0 | 0            | 0 | 0           | 0 | 0.12396015  | 0 | 0.12032656 | 0 | -0.052586559 |
| 0 | 0            | 0 | 0.020874779 | 0 | 0.10297384  | 0 | 0.11819334 | 0 | 0            |
| 0 | -0.049594542 | 0 | 0.069279896 | 0 | 0           | 0 | 0.1188622  | 0 | 0            |
| 0 | -0.04518326  | 0 | 0.07058474  | 0 | 0           | 0 | 0.11891423 | 0 | 0.006033     |
| 0 | -0.041529701 | 0 | 0.071472375 | 0 | 0           | 0 | 0.1191435  | 0 | 0            |
| 0 | -0.048885631 | 0 | 0.06958562  | 0 | 0           | 0 | 0.1185269  | 0 | 0            |
| 0 | -0.044418578 | 0 | 0.070876682 | 0 | 0           | 0 | 0.11859993 | 0 | 0.005390123  |
| 0 | -0.055643808 | 0 | 0.079696069 | 0 | 0           | 0 | 0.11559516 | 0 | -0.46373314  |
| 0 | 0            | 0 | 0           | 0 | 0.12374988  | 0 | 0.11962462 | 0 | 0            |
| 0 | 0            | 0 | 0.054756396 | 0 | 0.070944049 | 0 | 0.11700198 | 0 | 0            |
| 0 | -0.026365076 | 0 | 0.022436846 | 0 | 0.08063968  | 0 | 0.1316706  | 0 | -0.48838308  |
| 0 | -0.025696233 | 0 | 0.022810149 | 0 | 0.080460474 | 0 | 0.13145251 | 0 | -0.48908672  |
| 0 | 0            | 0 | 0.036563921 | 0 | 0.086860381 | 0 | 0.13187146 | 0 | -0.51124906  |
| 0 | -0.060209612 | 0 | 0.047829675 | 0 | 0           | 0 | 0.11959908 | 0 | 0            |
| 0 | 0            | 0 | 0.036764979 | 0 | 0.086226162 | 0 | 0.13168568 | 0 | -0.51130841  |
| 0 | -0.056033441 | 0 | 0.048647534 | 0 | 0           | 0 | 0.11958705 | 0 | 0.012923296  |
| 0 | 0            | 0 | 0.022141906 | 0 | 0.098493302 | 0 | 0.13200419 | 0 | -0.51590428  |
| 0 | -0.02582995  | 0 | 0           | 0 | 0.10251352  | 0 | 0.13317525 | 0 | -0.49562414  |
| 0 | -0.025469136 | 0 | 0           | 0 | 0.10262211  | 0 | 0.13330712 | 0 | -0.49598919  |
| 0 | 0            | 0 | 0.088612957 | 0 | 0           | 0 | 0.11971289 | 0 | -0.033715865 |
| 0 | -0.025233053 | 0 | 0           | 0 | 0.10279015  | 0 | 0.13292406 | 0 | -0.49636258  |
| 0 | 0            | 0 | 0.089231637 | 0 | 0           | 0 | 0.11916216 | 0 | 0            |
| 0 | -0.026220391 | 0 | 0.033260805 | 0 | 0.090796841 | 0 | 0.12514206 | 0 | -0.48521176  |
| 0 | 0            | 0 | 0           | 0 | 0.11997906  | 0 | 0.13353219 | 0 | -0.52243586  |
| 0 | 0            | 0 | 0.063947263 | 0 | 0           | 0 | 0.12701    | 0 | -0.52591727  |
| 0 | -0.045755939 | 0 | 0.067096988 | 0 | 0           | 0 | 0.13197484 | 0 | -0.45586683  |
| 0 | -0.04478091  | 0 | 0.067288041 | 0 | 0           | 0 | 0.13173163 | 0 | -0.45698675  |

|   |              |   |             |   |             |            |            |             |
|---|--------------|---|-------------|---|-------------|------------|------------|-------------|
| 0 | -0.078758612 | 0 | 0           | 0 | 0           | 0.13116051 | 0          | -0.46391239 |
| 0 | -0.079363377 | 0 | 0           | 0 | 0           | 0.13093214 | 0          | -0.46323436 |
| 0 | -0.031391333 | 0 | 0.03777959  | 0 | 0.064221746 | 0          | 0.1252671  | 0           |
| 0 | -0.027078167 | 0 | 0.037077035 | 0 | 0.067580618 | 0          | 0.12544038 | 0           |
| 0 | -0.025284088 | 0 | 0.036576758 | 0 | 0.069757712 | 0          | 0.12550105 | 0           |
| 0 | -0.030764512 | 0 | 0.037965169 | 0 | 0.064288953 | 0          | 0.12500451 | 0           |
| 0 | -0.024637316 | 0 | 0.036768485 | 0 | 0.06977836  | 0          | 0.12526169 | 0           |
| 0 | -0.078491376 | 0 | 0           | 0 | 0           | 0.13058648 | 0          | -0.46420797 |
| 0 | -0.032755463 | 0 | 0.023982159 | 0 | 0.074617351 | 0          | 0.12531998 | 0           |
| 0 | -0.026538928 | 0 | 0.023088579 | 0 | 0.079926815 | 0          | 0.12557986 | 0           |
| 0 | -0.054415092 | 0 | 0.048905415 | 0 | 0           | 0.13227731 | 0          | -0.45332106 |
| 0 | 0            | 0 | 0.037483578 | 0 | 0.085901467 | 0          | 0.1257901  | 0           |
| 0 | 0            | 0 | 0.038990481 | 0 | 0.084369705 | 0          | 0.12518785 | 0           |
| 0 | -0.026096548 | 0 | 0           | 0 | 0.10250646  | 0          | 0.12707306 | 0           |
| 0 | -0.032406951 | 0 | 0           | 0 | 0.097989328 | 0          | 0.1267978  | 0           |
| 0 | 0            | 0 | 0.085181896 | 0 | 0           | 0.13286503 | 0          | -0.49868848 |
| 0 | -0.049661881 | 0 | 0.066318367 | 0 | 0           | 0.1260133  | 0          | 0           |
| 0 | -0.045399693 | 0 | 0.067530788 | 0 | 0           | 0.12596447 | 0          | 0.023390401 |
| 0 | -0.083065011 | 0 | 0           | 0 | 0           | 0.12494334 | 0          | 0           |
| 0 | -0.07935372  | 0 | 0           | 0 | 0           | 0.12484188 | 0          | 0.02713599  |
| 0 | -0.024583976 | 0 | 0.042502848 | 0 | 0.0841247   | 0          | 0          | 0           |
| 0 | -0.077940663 | 0 | 0           | 0 | 0           | 0.13745902 | 0          | -0.44521648 |
| 0 | 0            | 0 | 0.044525525 | 0 | 0.090797984 | 0          | 0          | 0           |
| 0 | 0            | 0 | 0.044558572 | 0 | 0.090883225 | 0          | 0          | 0           |
| 0 | -0.026127958 | 0 | 0.025173657 | 0 | 0.089122084 | 0          | 0          | 0           |
| 0 | -0.02586422  | 0 | 0.025278392 | 0 | 0.089425214 | 0          | 0          | 0           |
| 0 | 0            | 0 | 0.024630546 | 0 | 0.10762536  | 0          | 0          | 0           |
| 0 | -0.025430258 | 0 | 0           | 0 | 0.11435891  | 0          | 0          | 0           |
| 0 | -0.025170814 | 0 | 0           | 0 | 0.11431529  | 0          | 0          | 0           |
| 0 | -0.024980111 | 0 | 0           | 0 | 0.11488753  | 0          | 0          | 0           |
| 0 | -0.024297347 | 0 | 0.04415128  | 0 | 0.074297584 | 0          | 0          | 0           |
| 0 | -0.024039734 | 0 | 0.044165305 | 0 | 0.074759676 | 0          | 0          | 0           |
| 0 | -0.029275269 | 0 | 0.045115913 | 0 | 0.069755997 | 0          | 0          | 0           |
| 0 | -0.029030338 | 0 | 0.04512486  | 0 | 0.070250629 | 0          | 0          | 0           |
| 0 | -0.0361618   | 0 | 0.046342409 | 0 | 0.063824647 | 0          | 0          | 0           |
| 0 | 0            | 0 | 0           | 0 | 0.1319754   | 0          | 0          | 0           |
| 0 | 0            | 0 | 0.044891276 | 0 | 0.09053343  | 0          | 0          | 0           |
| 0 | -0.046232419 | 0 | 0.077108114 | 0 | 0           | 0          | 0          | 0           |
| 0 | -0.045768968 | 0 | 0.077302123 | 0 | 0           | 0          | 0          | 0           |
| 0 | -0.0264897   | 0 | 0.02530245  | 0 | 0.088897197 | 0          | 0          | 0           |
| 0 | -0.031544645 | 0 | 0.026078547 | 0 | 0.084493535 | 0          | 0          | 0           |
| 0 | 0            | 0 | 0.046123422 | 0 | 0.0891987   | 0          | 0          | 0           |
| 0 | -0.025628029 | 0 | 0           | 0 | 0.11437344  | 0          | 0          | 0           |
| 0 | -0.030789634 | 0 | 0           | 0 | 0.1106264   | 0          | 0          | 0           |
| 0 | 0            | 0 | 0           | 0 | 0           | 0.13600615 | 0          | 0           |
| 0 | -0.049595338 | 0 | 0.076238721 | 0 | 0           | 0          | 0          | 0           |
| 0 | -0.046218321 | 0 | 0.077220006 | 0 | 0           | 0          | 0          | 0           |
| 0 |              | 0 |             | 0 |             |            |            | 0.009832289 |

|   |              |   |             |            |              |             |             |              |
|---|--------------|---|-------------|------------|--------------|-------------|-------------|--------------|
| 0 | -0.057635691 | 0 | 0.054500792 | 0          | 0            | 0           | 0           | -0.35042085  |
| 0 | 0            | 0 | 0.095676903 | 0          | 0            | 0           | 0           | -0.39875473  |
| 0 | -0.025812886 | 0 | 0.042121961 | 0          | 0.072047057  | 0           | 0           | -0.35609984  |
| 0 | -0.025476534 | 0 | 0.042217921 | 0          | 0.072027571  | 0           | 0           | -0.35659043  |
| 0 | -0.027173198 | 0 | 0.028590638 | 0          | 0.082360438  | 0           | 0           | -0.35895617  |
| 0 | -0.084503375 | 0 | 0.09455728  | 0          | -0.086246522 | 0           | 0.053274738 | 0            |
| 0 | 0            | 0 | 0.042995141 | 0          | 0.08877585   | 0           | 0           | -0.38241515  |
| 0 | -0.083763772 | 0 | 0.095239481 | 0          | -0.08684661  | 0           | 0.052239767 | 0            |
| 0 | -0.080923099 | 0 | 0.094594774 | 0          | -0.084468258 | 0           | 0.051663398 | 0.058253041  |
| 0 | -0.078092707 | 0 | 0.089486366 | 0          | -0.076168223 | 0           | 0.065058076 | -0.34456214  |
| 0 | -0.077333382 | 0 | 0.090256022 | 0          | -0.077108617 | 0           | 0.063998336 | -0.3447819   |
| 0 | -0.08016496  | 0 | 0.095280755 | 0          | -0.085093119 | 0           | 0.050643397 | 0.057817     |
| 0 | -0.026856019 | 0 | 0           | 0.11005631 | 0            | 0           | 0           | -0.36614328  |
| 0 | -0.03050397  | 0 | 0.043418015 | 0          | 0.067315368  | 0           | 0           | 0            |
| 0 | -0.025946116 | 0 | 0.042523872 | 0          | 0.071426271  | 0           | 0           | 0.002853973  |
| 0 | -0.046753038 | 0 | 0.074154663 | 0          | 0            | 0           | 0           | -0.32568144  |
| 0 | -0.080570276 | 0 | 0.089115017 | 0          | -0.075745876 | 0           | 0.062942245 | 0            |
| 0 | -0.069892657 | 0 | 0.086573949 | 0          | -0.052682938 | 0           | 0           | -0.31205451  |
| 0 | -0.083989449 | 0 | 0           | 0          | 0            | 0           | 0           | -0.33572208  |
| 0 | -0.069530027 | 0 | 0.087235629 | 0          | -0.053632535 | 0           | 0           | -0.31252916  |
| 0 | -0.076914816 | 0 | 0.089085261 | 0          | -0.073827663 | 0           | 0.06141078  | 0.062981649  |
| 0 | -0.045751823 | 0 | 0.095808282 | 0          | -0.071339128 | 0           | 0.041743515 | 0            |
| 0 | -0.07274729  | 0 | 0.086458668 | 0          | -0.053243001 | 0           | 0           | 0            |
| 0 | -0.06978169  | 0 | 0.086715677 | 0          | -0.052559332 | 0           | 0           | 0.043942084  |
| 0 | -0.061651564 | 0 | 0.048823351 | 0          | 0            | 0.016408582 | 0           | -0.33041058  |
| 0 | -0.093366579 | 0 | 0.098891018 | 0          | -0.06978294  | 0.031097547 | 0           | -0.31973406  |
| 0 | -0.061235245 | 0 | 0.049348142 | 0          | 0            | 0.015069345 | 0           | -0.32996218  |
| 0 | -0.060251233 | 0 | 0.052891906 | 0          | 0            | 0           | 0           | -0.31916224  |
| 0 | -0.06101893  | 0 | 0.049005732 | 0          | 0            | 0.025875264 | 0           | -0.33136281  |
| 0 | -0.061918388 | 0 | 0.077076218 | 0          | -0.029927628 | 0           | 0           | -0.30421614  |
| 0 | 0            | 0 | 0.11227022  | 0          | -0.062536834 | 0.039029823 | 0           | -0.40390983  |
| 0 | 0            | 0 | 0.11276657  | 0          | -0.063983918 | 0.038545907 | 0           | -0.40365436  |
| 0 | -0.064768403 | 0 | 0.048851589 | 0          | 0            | 0.014695989 | 0           | 0            |
| 0 | -0.061705471 | 0 | 0.049737368 | 0          | 0            | 0.01404053  | 0           | 0.035914694  |
| 0 | 0            | 0 | 0.10697634  | 0          | -0.055324884 | 0.048199857 | 0           | -0.40175151  |
| 0 | -0.099189466 | 0 | 0           | 0          | -0.028527341 | 0.04324374  | 0           | -0.33420884  |
| 0 | 0            | 0 | 0.10415634  | 0          | -0.040452874 | 0           | 0           | -0.37349975  |
| 0 | 0            | 0 | 0.11171607  | 0          | -0.061206302 | 0.035886276 | 0           | -0.013403323 |
| 0 | -0.098611684 | 0 | 0           | 0          | -0.028595352 | 0.04188827  | 0           | -0.3340089   |
| 0 | 0            | 0 | 0.11243476  | 0          | -0.061525024 | 0.036163963 | 0           | 0            |
| 0 | -0.1092072   | 0 | 0.037627586 | 0          | -0.080187561 | 0.034319365 | 0           | -0.30539979  |
| 0 | -0.085361147 | 0 | 0           | 0          | 0            | 0.027132299 | 0           | -0.32966616  |
| 0 | -0.10810323  | 0 | 0.03853017  | 0          | -0.081149668 | 0.0334237   | 0           | -0.30585083  |
| 0 | -0.095451329 | 0 | 0           | 0          | -0.023000995 | 0.051194241 | 0           | -0.33471645  |
| 0 | -0.10173206  | 0 | 0           | 0          | -0.02807898  | 0.041203671 | 0           | 0            |
| 0 | -0.10495155  | 0 | 0.038022025 | 0          | -0.075037268 | 0.041229169 | 0           | -0.30822464  |
| 0 | -0.098234467 | 0 | 0           | 0          | -0.026328595 | 0.039607996 | 0           | 0.06026757   |

|   |              |   |              |   |              |   |             |   |              |
|---|--------------|---|--------------|---|--------------|---|-------------|---|--------------|
| 0 | -0.1107029   | 0 | 0.038382308  | 0 | -0.080118038 | 0 | 0.03293418  | 0 | 0            |
| 0 | 0            | 0 | 0.073103601  | 0 | 0            | 0 | 0.01199442  | 0 | -0.38157361  |
| 0 | -0.088499078 | 0 | 0            | 0 | -0.005319943 | 0 | 0           | 0 | -0.30897163  |
| 0 | -0.098415771 | 0 | 0.037614622  | 0 | -0.05869029  | 0 | 0           | 0 | -0.2880523   |
| 0 | -0.10761792  | 0 | 0.03803505   | 0 | -0.078342716 | 0 | 0.031129961 | 0 | 0.078277565  |
| 0 | -0.11021642  | 0 | 0            | 0 | -0.047968266 | 0 | 0.034133338 | 0 | -0.31245268  |
| 0 | -0.089169939 | 0 | -0.002369045 | 0 | 0            | 0 | -0.00080813 | 0 | -0.29409433  |
| 0 | 0            | 0 | 0            | 0 | 0.015028126  | 0 | 0.019964855 | 0 | -0.40660276  |
| 0 | 0            | 0 | 0.041758136  | 0 | -0.04355877  | 0 | 0.00325844  | 0 | -0.37764681  |
| 0 | 0            | 0 | 0.038382084  | 0 | 0.088313794  | 0 | 0.12476941  | 0 | -0.53155367  |
| 0 | 0            | 0 | 0.038503371  | 0 | 0.088184311  | 0 | 0.12449797  | 0 | -0.53154573  |
| 0 | -0.025317376 | 0 | 0.019859264  | 0 | 0.08648507   | 0 | 0.12481628  | 0 | -0.51050964  |
| 0 | -0.024746831 | 0 | 0.020151893  | 0 | 0.086699561  | 0 | 0.1245205   | 0 | -0.5110546   |
| 0 | -0.024309847 | 0 | 0            | 0 | 0.1066556    | 0 | 0.12626008  | 0 | -0.51773473  |
| 0 | -0.024686332 | 0 | 0            | 0 | 0.10615615   | 0 | 0.12614635  | 0 | -0.51799077  |
| 0 | 0            | 0 | 0.019429545  | 0 | 0.10410155   | 0 | 0.12508664  | 0 | -0.5370318   |
| 0 | -0.023814254 | 0 | 0            | 0 | 0.10728304   | 0 | 0.12591684  | 0 | -0.51829084  |
| 0 | -0.024487822 | 0 | 0.035386797  | 0 | 0.091506942  | 0 | 0.11851921  | 0 | -0.50750345  |
| 0 | 0            | 0 | 0            | 0 | 0.1234704    | 0 | 0.1265055   | 0 | -0.54308954  |
| 0 | -0.044918916 | 0 | 0.070047576  | 0 | 0            | 0 | 0.12502295  | 0 | -0.47636658  |
| 0 | -0.044156081 | 0 | 0.070337872  | 0 | 0            | 0 | 0.12471202  | 0 | -0.47711733  |
| 0 | -0.023705237 | 0 | 0.038429392  | 0 | 0.072261733  | 0 | 0.1184328   | 0 | -0.022155974 |
| 0 | -0.023162327 | 0 | 0.038541038  | 0 | 0.072702216  | 0 | 0.11810724  | 0 | -0.022618496 |
| 0 | -0.030130002 | 0 | 0.039680279  | 0 | 0.066415779  | 0 | 0.1180843   | 0 | 0            |
| 0 | -0.037488524 | 0 | 0.041037139  | 0 | 0.059814644  | 0 | 0.11800288  | 0 | 0            |
| 0 | -0.029601899 | 0 | 0.039786542  | 0 | 0.066898833  | 0 | 0.11773915  | 0 | 0            |
| 0 | 0            | 0 | 0.039216287  | 0 | 0.087812566  | 0 | 0.11863729  | 0 | -0.044985206 |
| 0 | -0.025697342 | 0 | 0.020396538  | 0 | 0.086070727  | 0 | 0.11868691  | 0 | -0.023582633 |
| 0 | -0.032217198 | 0 | 0.021389903  | 0 | 0.080423138  | 0 | 0.11830413  | 0 | 0            |
| 0 | 0            | 0 | 0.040793889  | 0 | 0.08616126   | 0 | 0.1179636   | 0 | 0            |
| 0 | -0.055686991 | 0 | 0.048264978  | 0 | 0            | 0 | 0.12571656  | 0 | -0.47170628  |
| 0 | -0.024783851 | 0 | 0            | 0 | 0.1068908    | 0 | 0.12008981  | 0 | -0.028557326 |
| 0 | -0.031409341 | 0 | 0            | 0 | 0.10210141   | 0 | 0.11970918  | 0 | 0            |
| 0 | 0            | 0 | 0.08796743   | 0 | 0            | 0 | 0.12585183  | 0 | -0.51847834  |
| 0 | -0.049319438 | 0 | 0.069223632  | 0 | 0            | 0 | 0.11889801  | 0 | 0            |
| 0 | -0.04485518  | 0 | 0.070521467  | 0 | 0            | 0 | 0.1189696   | 0 | 0.005688178  |
| 0 | -0.024876114 | 0 | 0.03580815   | 0 | 0.070257003  | 0 | 0.13162445  | 0 | -0.48565903  |
| 0 | -0.024233298 | 0 | 0.035998871  | 0 | 0.070275772  | 0 | 0.13138834  | 0 | -0.48639289  |
| 0 | -0.026109168 | 0 | 0.022616553  | 0 | 0.080178622  | 0 | 0.13172123  | 0 | -0.48863358  |
| 0 | 0            | 0 | 0.036702595  | 0 | 0.086132095  | 0 | 0.13193245  | 0 | -0.51125046  |
| 0 | -0.025666222 | 0 | 0            | 0 | 0.10230937   | 0 | 0.1332124   | 0 | -0.4958202   |
| 0 | -0.045139294 | 0 | 0.066987696  | 0 | 0            | 0 | 0.13205607  | 0 | -0.45659106  |
| 0 | -0.078781879 | 0 | 0            | 0 | 0            | 0 | 0.1310197   | 0 | -0.46362712  |
| 0 | -0.031196266 | 0 | 0.037873902  | 0 | 0.063891626  | 0 | 0.12530473  | 0 | 0            |
| 0 | -0.02506107  | 0 | 0.036682097  | 0 | 0.06938848   | 0 | 0.12554658  | 0 | -0.003140757 |
| 0 | -0.024007166 | 0 | 0.043794921  | 0 | 0.07475999   | 0 | 0           | 0 | -0.38854339  |
| 0 | -0.023763881 | 0 | 0.043804382  | 0 | 0.075223424  | 0 | 0           | 0 | -0.38904112  |

|   |              |   |             |   |              |   |             |   |              |
|---|--------------|---|-------------|---|--------------|---|-------------|---|--------------|
| 0 | 0            | 0 | 0.044521825 | 0 | 0.090817645  | 0 | 0           | 0 | -0.41318188  |
| 0 | -0.026180887 | 0 | 0.025142808 | 0 | 0.089219742  | 0 | 0           | 0 | -0.39139032  |
| 0 | -0.025331432 | 0 | 0           | 0 | 0.11452065   | 0 | 0           | 0 | -0.39855417  |
| 0 | -0.024387291 | 0 | 0.044108871 | 0 | 0.074449221  | 0 | 0           | 0 | -0.018912433 |
| 0 | -0.02938119  | 0 | 0.04506494  | 0 | 0.069937416  | 0 | 0           | 0 | 0            |
| 0 | -0.046072268 | 0 | 0.077072514 | 0 | 0            | 0 | 0           | 0 | -0.35628377  |
| 0 | -0.081698687 | 0 | 0.095050494 | 0 | -0.087109085 | 0 | 0.055476963 | 0 | -0.34482982  |
| 0 | -0.080943009 | 0 | 0.095738616 | 0 | -0.087737396 | 0 | 0.054446192 | 0 | -0.34487788  |
| 0 | -0.025685994 | 0 | 0.042182745 | 0 | 0.071837689  | 0 | 0           | 0 | -0.35620507  |
| 0 | -0.084281409 | 0 | 0.094621057 | 0 | -0.086503956 | 0 | 0.05335674  | 0 | 0            |
| 0 | -0.080684797 | 0 | 0.094655635 | 0 | -0.084754954 | 0 | 0.051754746 | 0 | 0.058018276  |
| 0 | -0.077741796 | 0 | 0.089613865 | 0 | -0.076634812 | 0 | 0.065155441 | 0 | -0.34497189  |
| 0 | -0.069754932 | 0 | 0.086603075 | 0 | -0.052800342 | 0 | 0           | 0 | -0.31216891  |
| 0 | -0.061870014 | 0 | 0.048879798 | 0 | 0            | 0 | 0.01643371  | 0 | -0.33025536  |
| 0 | 0            | 0 | 0.11232037  | 0 | -0.063552777 | 0 | 0.039434833 | 0 | -0.40416763  |
| 0 | -0.099081294 | 0 | 0           | 0 | -0.028638132 | 0 | 0.043275418 | 0 | -0.33429754  |
| 0 | -0.10860862  | 0 | 0.037941388 | 0 | -0.08080644  | 0 | 0.03457473  | 0 | -0.30609032  |
| 0 | -0.023291382 | 0 | 0.037663055 | 0 | 0.072768835  | 0 | 0.12457425  | 0 | -0.5074713   |
| 0 | -0.022751287 | 0 | 0.037774037 | 0 | 0.073207555  | 0 | 0.12425227  | 0 | -0.5080414   |
| 0 | 0            | 0 | 0.038427101 | 0 | 0.088068121  | 0 | 0.12479638  | 0 | -0.53153981  |
| 0 | -0.025255338 | 0 | 0.019904316 | 0 | 0.086369874  | 0 | 0.12483196  | 0 | -0.51056006  |
| 0 | -0.024353457 | 0 | 0           | 0 | 0.10668417   | 0 | 0.12628794  | 0 | -0.51733567  |
| 0 | -0.044590402 | 0 | 0.069984215 | 0 | 0            | 0 | 0.12507855  | 0 | -0.47671867  |
| 0 | -0.023685774 | 0 | 0.038438749 | 0 | 0.072227238  | 0 | 0.1184378   | 0 | -0.02217369  |
| 0 | -0.030131501 | 0 | 0.039679585 | 0 | 0.066418272  | 0 | 0.11808392  | 0 | 0            |
| 0 | -0.024656653 | 0 | 0.035926188 | 0 | 0.069873643  | 0 | 0.13167688  | 0 | -0.48596466  |
| 0 | -0.024102377 | 0 | 0.043749693 | 0 | 0.074920943  | 0 | 0           | 0 | -0.38848303  |
| 0 | -0.081469819 | 0 | 0.09508922  | 0 | -0.087393958 | 0 | 0.055572634 | 0 | -0.34516525  |
| 0 | -0.023273749 | 0 | 0.037670305 | 0 | 0.072720743  | 0 | 0.12456942  | 0 | -0.50744947  |



|   |              |   |              |   |              |              |   |
|---|--------------|---|--------------|---|--------------|--------------|---|
| 0 | -0.018106837 | 0 | 0            | 0 | 0            | 0            | 0 |
| 0 | 0            | 0 | 0            | 0 | 0            | 0            | 0 |
| 0 | 0            | 0 | 0            | 0 | 0            | 0            | 0 |
| 0 | 0            | 0 | 0            | 0 | 0            | -0.016539745 | 0 |
| 0 | 0            | 0 | 0            | 0 | 0            | 0            | 0 |
| 0 | 0            | 0 | 0            | 0 | 0            | 0            | 0 |
| 0 | -0.015246083 | 0 | 0            | 0 | 0            | 0            | 0 |
| 0 | 0            | 0 | 0            | 0 | 0            | 0            | 0 |
| 0 | 0            | 0 | 0            | 0 | 0            | 0            | 0 |
| 0 | 0            | 0 | 0            | 0 | 0            | 0            | 0 |
| 0 | -0.014138293 | 0 | 0            | 0 | 0            | 0            | 0 |
| 0 | 0            | 0 | 0            | 0 | 0            | -0.000848724 | 0 |
| 0 | 0            | 0 | 0            | 0 | 0            | 0            | 0 |
| 0 | 0            | 0 | 0            | 0 | 0            | 0.02871573   | 0 |
| 0 | 0            | 0 | 0            | 0 | 0            | 0            | 0 |
| 0 | 0            | 0 | 0            | 0 | 0            | 0.018620855  | 0 |
| 0 | -0.006947649 | 0 | 0            | 0 | 0            | 0.018830495  | 0 |
| 0 | 0.38666868   | 0 | 0            | 0 | 0            | 0            | 0 |
| 0 | 0            | 0 | 0            | 0 | 0            | 0.021828229  | 0 |
| 0 | 0            | 0 | 0            | 0 | 0            | 0            | 0 |
| 0 | -0.011967247 | 0 | 0            | 0 | 0            | 0            | 0 |
| 0 | 0            | 0 | 0            | 0 | 0            | 0            | 0 |
| 0 | -0.011474645 | 0 | 0            | 0 | 0            | 0            | 0 |
| 0 | 0            | 0 | 0            | 0 | 0            | -0.047778347 | 0 |
| 0 | 0            | 0 | 0            | 0 | 0            | 0            | 0 |
| 0 | 0            | 0 | 0            | 0 | 0            | 0            | 0 |
| 0 | 0            | 0 | 0            | 0 | 0            | 0            | 0 |
| 0 | 0            | 0 | 0            | 0 | 0            | 0            | 0 |
| 0 | -0.027090216 | 0 | 0            | 0 | 0            | 0            | 0 |
| 0 | 0            | 0 | -0.013967049 | 0 | 0            | 0            | 0 |
| 0 | 0            | 0 | 0            | 0 | -0.013871234 | 0            | 0 |
| 0 | 0            | 0 | 0            | 0 | 0            | 0            | 0 |
| 0 | 0            | 0 | 0            | 0 | 0            | 0            | 0 |
| 0 | 0            | 0 | 0            | 0 | -0.076306681 | 0            | 0 |
| 0 | 0            | 0 | -0.075592334 | 0 | 0            | 0            | 0 |
| 0 | 0            | 0 | 0            | 0 | 0            | -0.049400136 | 0 |
| 0 | 0            | 0 | 0            | 0 | 0            | 0            | 0 |
| 0 | 0            | 0 | 0            | 0 | 0            | 0            | 0 |
| 0 | 0            | 0 | 0            | 0 | -0.043491265 | 0            | 0 |
| 0 | 0            | 0 | -0.042411303 | 0 | 0            | 0            | 0 |
| 0 | 0            | 0 | 0            | 0 | 0            | -0.06560226  | 0 |
| 0 | 0            | 0 | -0.050815227 | 0 | 0            | 0            | 0 |
| 0 | 0            | 0 | 0            | 0 | -0.050653144 | 0            | 0 |
| 0 | 0            | 0 | 0            | 0 | 0            | 0            | 0 |
| 0 | -0.007435174 | 0 | 0            | 0 | 0            | 0            | 0 |
| 0 | 0            | 0 | 0            | 0 | -0.050737399 | 0            | 0 |
| 0 | 0            | 0 | -0.050317632 | 0 | 0            | 0            | 0 |

|   |              |   |              |   |              |              |              |
|---|--------------|---|--------------|---|--------------|--------------|--------------|
| 0 | 0.075213923  | 0 | 0            | 0 | 0            | 0            | 0            |
| 0 | 0            | 0 | 0            | 0 | 0            | -0.041932318 | 0            |
| 0 | 0.06282848   | 0 | -0.05588145  | 0 | 0            | 0            | 0            |
| 0 | 0            | 0 | 0            | 0 | 0            | 0            | 0            |
| 0 | 0            | 0 | 0            | 0 | 0            | 0            | 0            |
| 0 | 0.062442543  | 0 | 0            | 0 | -0.055534057 | 0            | 0            |
| 0 | 0            | 0 | -0.056860013 | 0 | 0            | 0            | 0            |
| 0 | 0            | 0 | 0            | 0 | -0.056568473 | 0            | 0            |
| 0 | 0            | 0 | -0.05813382  | 0 | 0            | 0            | 0            |
| 0 | 0            | 0 | 0            | 0 | -0.058192184 | 0            | 0            |
| 0 | 0            | 0 | 0            | 0 | -0.062208754 | 0            | -0.045686626 |
| 0 | 0.082200838  | 0 | 0            | 0 | 0            | 0            | 0            |
| 0 | 0            | 0 | -0.061558845 | 0 | 0            | 0            | -0.046185789 |
| 0 | 0            | 0 | 0            | 0 | 0            | 0            | 0            |
| 0 | 0            | 0 | -0.067066475 | 0 | 0            | 0            | 0            |
| 0 | 0            | 0 | 0            | 0 | 0            | 0            | -0.014203663 |
| 0 | 0            | 0 | -0.071633573 | 0 | 0            | 0            | -0.006381156 |
| 0 | 0            | 0 | 0            | 0 | 0            | 0            | 0            |
| 0 | 0            | 0 | 0            | 0 | -0.06719989  | 0            | 0            |
| 0 | 0            | 0 | -0.049522049 | 0 | -0.02041142  | 0            | 0            |
| 0 | -0.020482622 | 0 | 0            | 0 | 0            | 0            | 0            |
| 0 | 0            | 0 | -0.069814218 | 0 | 0            | 0            | 0            |
| 0 | 0            | 0 | -0.06933435  | 0 | 0            | 0            | 0            |
| 0 | 0            | 0 | 0            | 0 | 0            | 0            | 0            |
| 0 | 0            | 0 | 0            | 0 | -0.071106857 | 0            | -0.004894079 |
| 0 | 0            | 0 | 0            | 0 | -0.069710011 | 0            | 0            |
| 0 | 0            | 0 | 0            | 0 | -0.06859988  | 0            | 0            |
| 0 | 0            | 0 | 0            | 0 | 0            | 0            | 0            |
| 0 | -0.001022942 | 0 | 0            | 0 | 0            | 0            | 0            |
| 0 | 0            | 0 | 0            | 0 | 0            | 0            | 0            |
| 0 | 0            | 0 | 0            | 0 | 0            | 0            | 0            |
| 0 | 0            | 0 | 0            | 0 | 0            | 0            | 0            |
| 0 | 0.097454691  | 0 | 0            | 0 | 0            | 0            | 0            |
| 0 | 0            | 0 | 0            | 0 | 0            | 0            | 0            |
| 0 | 0.088864864  | 0 | 0            | 0 | 0            | 0            | 0            |
| 0 | 0.36626743   | 0 | 0            | 0 | 0            | 0            | 0            |
| 0 | 0            | 0 | 0            | 0 | 0            | 0            | -0.030241959 |
| 0 | 0            | 0 | 0            | 0 | -0.0657926   | 0            | 0            |
| 0 | -0.023436969 | 0 | 0            | 0 | -0.065667839 | 0            | 0            |
| 0 | 0            | 0 | -0.064710625 | 0 | 0            | 0            | 0            |
| 0 | 0            | 0 | 0            | 0 | 0            | 0            | 0            |
| 0 | -0.023152857 | 0 | -0.0645924   | 0 | 0            | 0            | 0            |
| 0 | 0.094798086  | 0 | 0            | 0 | 0            | 0            | 0            |
| 0 | 0.094710346  | 0 | 0            | 0 | 0            | 0            | 0.006409799  |
| 0 | 0            | 0 | 0            | 0 | 0            | 0            | 0            |
| 0 | 0            | 0 | 0            | 0 | -0.064615344 | 0            | 0            |
| 0 | 0            | 0 | -0.017303046 | 0 | -0.047424708 | 0            | 0            |



|   |              |   |              |   |              |             |              |
|---|--------------|---|--------------|---|--------------|-------------|--------------|
| 0 | 0            | 0 | -0.063843712 | 0 | 0            | 0           | 0            |
| 0 | 0            | 0 | -0.079660169 | 0 | 0            | 0           | 0            |
| 0 | 0            | 0 | 0            | 0 | 0            | 0           | 0            |
| 0 | 0            | 0 | -0.063490887 | 0 | 0            | 0           | 0            |
| 0 | 0            | 0 | 0            | 0 | 0            | 0.006473113 | 0            |
| 0 | 0            | 0 | 0            | 0 | -0.079338074 | 0           | 0            |
| 0 | 0            | 0 | 0            | 0 | -0.063996307 | 0           | 0            |
| 0 | 0            | 0 | 0            | 0 | 0            | 0           | 0            |
| 0 | 0            | 0 | -0.072739037 | 0 | 0            | 0           | -0.02144908  |
| 0 | 0            | 0 | 0            | 0 | 0            | 0           | -0.058648329 |
| 0 | 0            | 0 | 0            | 0 | -0.072893813 | 0           | -0.020220554 |
| 0 | 0            | 0 | 0            | 0 | -0.07324784  | 0           | 0            |
| 0 | 0            | 0 | -0.072492512 | 0 | 0            | 0           | 0            |
| 0 | -0.037693769 | 0 | 0            | 0 | 0            | 0           | -0.05775596  |
| 0 | -0.022158033 | 0 | 0            | 0 | -0.073097973 | 0           | 0            |
| 0 | -0.021959561 | 0 | -0.072348259 | 0 | 0            | 0           | 0            |
| 0 | 0            | 0 | 0            | 0 | -0.08532963  | 0           | 0            |
| 0 | 0            | 0 | -0.084397806 | 0 | 0            | 0           | 0            |
| 0 | 0.35772884   | 0 | -0.084283105 | 0 | 0            | 0           | 0            |
| 0 | 0            | 0 | -0.032343171 | 0 | -0.039967035 | 0           | 0            |
| 0 | 0.35777406   | 0 | 0            | 0 | -0.085148724 | 0           | 0            |
| 0 | 0            | 0 | -0.086886804 | 0 | 0            | 0           | 0            |
| 0 | 0            | 0 | -0.07689628  | 0 | 0            | 0           | 0            |
| 0 | -0.019531575 | 0 | -0.086763208 | 0 | 0            | 0           | 0            |
| 0 | 0            | 0 | 0            | 0 | -0.087319565 | 0           | 0            |
| 0 | 0            | 0 | 0            | 0 | -0.076731654 | 0           | 0            |
| 0 | 0            | 0 | -0.046575479 | 0 | -0.039759469 | 0           | 0            |
| 0 | -0.019893537 | 0 | 0            | 0 | -0.087187517 | 0           | 0            |
| 0 | 0            | 0 | 0            | 0 | 0            | 0           | -0.048181776 |
| 0 | 0            | 0 | -0.085566359 | 0 | 0            | 0           | -0.001558241 |
| 0 | 0            | 0 | -0.084488985 | 0 | 0            | 0           | 0            |
| 0 | -0.021587843 | 0 | -0.046560699 | 0 | -0.039606146 | 0           | 0            |
| 0 | 0            | 0 | -0.084153947 | 0 | 0            | 0           | 0            |
| 0 | 0            | 0 | -0.082395895 | 0 | 0            | 0           | 0.009741337  |
| 0 | 0            | 0 | 0            | 0 | -0.085099848 | 0           | 0            |
| 0 | 0            | 0 | 0            | 0 | -0.084095953 | 0           | 0            |
| 0 | 0            | 0 | 0            | 0 | -0.085733562 | 0           | -7.72E-05    |
| 0 | 0            | 0 | 0            | 0 | -0.08250426  | 0           | 0.010911758  |
| 0 | -0.021412167 | 0 | -0.084333011 | 0 | 0            | 0           | 0            |
| 0 | -0.021762166 | 0 | -0.085270967 | 0 | 0            | 0           | -0.001280154 |
| 0 | 0            | 0 | -0.052446576 | 0 | -0.034388467 | 0           | 0            |
| 0 | -0.021407401 | 0 | -0.083975363 | 0 | 0            | 0           | 0            |
| 0 | -0.021612557 | 0 | 0            | 0 | -0.084937797 | 0           | 0            |
| 0 | -0.021603187 | 0 | 0            | 0 | -0.083909074 | 0           | 0            |
| 0 | -0.021486601 | 0 | 0            | 0 | -0.08544234  | 0           | 0.000193954  |
| 0 | 0            | 0 | -0.044722527 | 0 | -0.039416548 | 0           | 0            |
| 0 | 0            | 0 | -0.045275353 | 0 | -0.038707314 | 0           | 0.001265573  |

[illegible]

|   |              |   |              |   |              |             |              |
|---|--------------|---|--------------|---|--------------|-------------|--------------|
| 0 | -0.000932209 | 0 | 0            | 0 | 0            | 0.028565777 | 0            |
| 0 | 0            | 0 | 0            | 0 | 0            | 0           | 0            |
| 0 | -0.005077433 | 0 | 0            | 0 | 0            | 0           | 0            |
| 0 | 0.38864032   | 0 | 0            | 0 | 0            | 0           | 0            |
| 0 | 0            | 0 | 0            | 0 | 0            | 0.020455002 | 0            |
| 0 | -0.006311914 | 0 | 0            | 0 | 0            | 0.020893055 | 0            |
| 0 | 0.3867466    | 0 | 0            | 0 | 0            | 0           | 0            |
| 0 | 0            | 0 | 0            | 0 | -0.056543994 | 0           | 0            |
| 0 | 0            | 0 | -0.055742351 | 0 | 0            | 0           | 0            |
| 0 | 0            | 0 | 0            | 0 | 0            | 0           | -0.057624298 |
| 0 | 0            | 0 | 0            | 0 | 0            | 0           | -0.060480496 |
| 0 | 0            | 0 | 0            | 0 | 0            | 0           | 0            |
| 0 | 0            | 0 | 0            | 0 | 0            | 0           | 0            |
| 0 | -0.047389596 | 0 | 0            | 0 | 0            | 0           | -0.059597997 |
| 0 | 0            | 0 | 0            | 0 | 0            | 0           | -0.043305854 |
| 0 | 0            | 0 | -0.062658076 | 0 | 0            | 0           | 0            |
| 0 | 0            | 0 | 0            | 0 | -0.062799687 | 0           | 0            |
| 0 | 0            | 0 | 0            | 0 | 0            | 0           | -0.05927971  |
| 0 | 0            | 0 | 0            | 0 | 0            | 0           | -0.048317525 |
| 0 | 0            | 0 | -0.011909416 | 0 | 0            | 0           | -0.047397315 |
| 0 | 0            | 0 | 0            | 0 | -0.011279548 | 0           | -0.047331883 |
| 0 | 0            | 0 | 0            | 0 | 0            | 0           | -0.047987052 |
| 0 | 0.074232715  | 0 | 0            | 0 | 0            | 0           | 0            |
| 0 | 0            | 0 | 0            | 0 | 0            | 0           | -0.06112325  |
| 0 | 0            | 0 | 0            | 0 | 0            | 0           | 0            |
| 0 | 0            | 0 | 0            | 0 | 0            | 0           | 0            |
| 0 | -0.010085561 | 0 | 0            | 0 | 0            | 0           | 0            |
| 0 | 0            | 0 | 0            | 0 | 0            | 0           | -0.054789973 |
| 0 | 0            | 0 | 0            | 0 | 0            | 0           | 0            |
| 0 | 0.36724838   | 0 | 0            | 0 | 0            | 0           | 0            |
| 0 | 0            | 0 | 0            | 0 | -0.07413117  | 0           | -0.037816843 |
| 0 | 0            | 0 | -0.073686387 | 0 | 0            | 0           | -0.038387716 |
| 0 | 0            | 0 | -0.01427021  | 0 | 0            | 0           | 0            |
| 0 | 0            | 0 | 0            | 0 | -0.013884139 | 0           | 0            |
| 0 | 0            | 0 | 0            | 0 | 0            | 0           | 0            |
| 0 | -0.022028642 | 0 | 0            | 0 | 0            | 0           | 0            |
| 0 | 0            | 0 | 0            | 0 | 0            | 0           | 0            |
| 0 | 0            | 0 | 0            | 0 | 0            | 0           | 0            |
| 0 | 0.003614877  | 0 | 0            | 0 | 0            | 0           | 0            |
| 0 | 0            | 0 | 0            | 0 | 0            | 0           | 0            |
| 0 | 0            | 0 | 0            | 0 | -0.017258355 | 0           | 0            |
| 0 | 0            | 0 | -0.016914274 | 0 | 0            | 0           | 0            |
| 0 | 0            | 0 | -0.015082549 | 0 | 0            | 0           | 0            |
| 0 | 0            | 0 | 0            | 0 | -0.015075585 | 0           | 0            |
| 0 | 0            | 0 | 0            | 0 | -0.041094058 | 0           | -0.047526073 |
| 0 | -0.027666801 | 0 | -0.015030202 | 0 | 0            | 0           | 0            |
| 0 | -0.027699079 | 0 | 0            | 0 | -0.015014731 | 0           | 0            |

|   |              |   |              |   |              |   |              |   |
|---|--------------|---|--------------|---|--------------|---|--------------|---|
| 0 | 0            | 0 | -0.040411079 | 0 | 0            | 0 | -0.047865718 | 0 |
| 0 | 0            | 0 | 0            | 0 | 0            | 0 | 0            | 0 |
| 0 | 0            | 0 | 0            | 0 | -0.078359348 | 0 | 0            | 0 |
| 0 | -0.027132338 | 0 | 0            | 0 | 0            | 0 | 0            | 0 |
| 0 | 0            | 0 | -0.077551367 | 0 | 0            | 0 | 0            | 0 |
| 0 | -0.027169313 | 0 | 0            | 0 | -0.078130498 | 0 | 0            | 0 |
| 0 | -0.026871984 | 0 | -0.077331375 | 0 | 0            | 0 | 0            | 0 |
| 0 | 0            | 0 | -0.045329213 | 0 | 0            | 0 | -0.062085164 | 0 |
| 0 | 0            | 0 | 0            | 0 | -0.045088947 | 0 | -0.061643689 | 0 |
| 0 | 0            | 0 | -0.014155917 | 0 | 0            | 0 | 0            | 0 |
| 0 | 0            | 0 | 0            | 0 | -0.014117005 | 0 | 0            | 0 |
| 0 | 0            | 0 | -0.009608555 | 0 | -0.00458342  | 0 | 0            | 0 |
| 0 | 0            | 0 | 0            | 0 | 0            | 0 | 0            | 0 |
| 0 | 0            | 0 | -0.027964329 | 0 | -0.049217743 | 0 | 0            | 0 |
| 0 | 0            | 0 | 0            | 0 | -0.076540797 | 0 | 0            | 0 |
| 0 | 0            | 0 | -0.075735677 | 0 | 0            | 0 | 0            | 0 |
| 0 | 0            | 0 | 0            | 0 | -0.038479132 | 0 | 0            | 0 |
| 0 | 0            | 0 | -0.03783485  | 0 | 0            | 0 | 0            | 0 |
| 0 | 0            | 0 | 0            | 0 | 0            | 0 | -0.056834894 | 0 |
| 0 | 0            | 0 | 0            | 0 | -0.035440989 | 0 | 0            | 0 |
| 0 | 0            | 0 | -0.034736018 | 0 | 0            | 0 | 0            | 0 |
| 0 | -0.026536662 | 0 | 0            | 0 | 0            | 0 | -0.055996039 | 0 |
| 0 | 0            | 0 | 0            | 0 | 0            | 0 | 0            | 0 |
| 0 | 0.053522635  | 0 | 0            | 0 | 0            | 0 | 0            | 0 |
| 0 | 0.05586132   | 0 | 0            | 0 | 0            | 0 | -0.057969924 | 0 |
| 0 | 0            | 0 | 0            | 0 | 0            | 0 | 0            | 0 |
| 0 | 0            | 0 | 0            | 0 | 0            | 0 | -0.058553805 | 0 |
| 0 | 0            | 0 | 0            | 0 | 0            | 0 | 0            | 0 |
| 0 | -0.003285869 | 0 | 0            | 0 | 0            | 0 | 0            | 0 |
| 0 | 0            | 0 | 0            | 0 | -0.044878463 | 0 | 0            | 0 |
| 0 | -0.012516792 | 0 | 0            | 0 | -0.04465212  | 0 | 0            | 0 |
| 0 | 0            | 0 | -0.043735441 | 0 | 0            | 0 | 0            | 0 |
| 0 | -0.012258014 | 0 | -0.043516271 | 0 | 0            | 0 | 0            | 0 |
| 0 | 0            | 0 | -0.006271956 | 0 | -0.03742429  | 0 | 0            | 0 |
| 0 | 0            | 0 | 0            | 0 | 0            | 0 | -0.065307776 | 0 |
| 0 | 0            | 0 | -0.047308589 | 0 | 0            | 0 | 0            | 0 |
| 0 | 0            | 0 | 0            | 0 | -0.046887568 | 0 | 0            | 0 |
| 0 | 0.057591607  | 0 | -0.039427211 | 0 | 0            | 0 | 0            | 0 |
| 0 | 0.056741976  | 0 | 0            | 0 | -0.039409264 | 0 | 0            | 0 |
| 0 | 0.37485287   | 0 | 0            | 0 | 0            | 0 | 0            | 0 |
| 0 | 0            | 0 | -0.040368749 | 0 | 0            | 0 | 0            | 0 |
| 0 | 0.061190638  | 0 | 0            | 0 | 0            | 0 | 0            | 0 |
| 0 | 0            | 0 | 0            | 0 | -0.040408099 | 0 | 0            | 0 |
| 0 | 0            | 0 | -0.052710872 | 0 | 0            | 0 | -0.018153588 | 0 |
| 0 | 0            | 0 | 0            | 0 | 0            | 0 | -0.052438319 | 0 |
| 0 | 0            | 0 | 0            | 0 | -0.052080677 | 0 | -0.017234063 | 0 |
| 0 | 0            | 0 | -0.051588409 | 0 | 0            | 0 | 0            | 0 |

|   |              |   |              |   |              |   |              |
|---|--------------|---|--------------|---|--------------|---|--------------|
| 0 | 0            | 0 | 0            | 0 | 0            | 0 | 0            |
| 0 | 0            | 0 | 0            | 0 | -0.051982479 | 0 | 0            |
| 0 | 0            | 0 | -0.056479507 | 0 | 0            | 0 | 0            |
| 0 | 0            | 0 | 0            | 0 | -0.055641978 | 0 | 0            |
| 0 | -0.037774993 | 0 | 0            | 0 | 0            | 0 | -0.051365244 |
| 0 | 0            | 0 | -0.051970819 | 0 | 0            | 0 | 0            |
| 0 | -0.008232451 | 0 | -0.051700525 | 0 | 0            | 0 | 0            |
| 0 | 0            | 0 | 0            | 0 | -0.05187946  | 0 | 0            |
| 0 | 0            | 0 | -0.035849011 | 0 | -0.015621465 | 0 | 0            |
| 0 | -0.008389538 | 0 | 0            | 0 | -0.051595818 | 0 | 0            |
| 0 | 0            | 0 | -0.059588577 | 0 | 0            | 0 | -0.032296492 |
| 0 | 0.37032041   | 0 | 0            | 0 | 0            | 0 | 0            |
| 0 | 0.059940023  | 0 | -0.046425079 | 0 | 0            | 0 | 0            |
| 0 | 0            | 0 | 0            | 0 | 0            | 0 | -0.023360225 |
| 0 | 0.059376327  | 0 | 0            | 0 | -0.045966402 | 0 | 0            |
| 0 | 0            | 0 | 0            | 0 | -0.058828886 | 0 | -0.031135504 |
| 0 | 0            | 0 | 0            | 0 | -0.051160363 | 0 | 0            |
| 0 | 0            | 0 | -0.047369624 | 0 | 0            | 0 | 0            |
| 0 | 0            | 0 | -0.050604807 | 0 | 0            | 0 | 0            |
| 0 | 0            | 0 | -0.06688294  | 0 | 0            | 0 | 0            |
| 0 | 0.35198471   | 0 | -0.056385327 | 0 | 0            | 0 | 0            |
| 0 | 0            | 0 | -0.021804319 | 0 | -0.029570952 | 0 | 0            |
| 0 | 0            | 0 | 0            | 0 | -0.046968345 | 0 | 0            |
| 0 | 0            | 0 | 0            | 0 | -0.065951225 | 0 | 0            |
| 0 | 0.075335618  | 0 | 0            | 0 | 0            | 0 | 0            |
| 0 | 0.35239786   | 0 | 0            | 0 | -0.056085444 | 0 | 0            |
| 0 | 0.066299827  | 0 | -0.052171452 | 0 | 0            | 0 | 0            |
| 0 | 0            | 0 | 0            | 0 | -0.064484781 | 0 | -0.057045451 |
| 0 | 0            | 0 | 0            | 0 | 0            | 0 | 0            |
| 0 | 0.06606483   | 0 | 0            | 0 | -0.051853926 | 0 | 0            |
| 0 | 0            | 0 | -0.063807905 | 0 | 0            | 0 | -0.057541711 |
| 0 | 0            | 0 | 0            | 0 | 0            | 0 | 0            |
| 0 | 0.50911113   | 0 | 0            | 0 | 0            | 0 | 0            |
| 0 | 0.06202223   | 0 | -0.057838896 | 0 | 0            | 0 | -0.004480772 |
| 0 | 0            | 0 | -0.053241021 | 0 | 0            | 0 | 0            |
| 0 | 0            | 0 | 0            | 0 | 0            | 0 | -0.041992243 |
| 0 | -0.04240127  | 0 | 0            | 0 | -0.064402195 | 0 | -0.056185669 |
| 0 | 0.063013342  | 0 | -0.056915476 | 0 | 0            | 0 | 0            |
| 0 | 0.062694045  | 0 | -0.056204761 | 0 | 0            | 0 | 0            |
| 0 | 0.062617623  | 0 | -0.050780823 | 0 | -0.005366851 | 0 | 0            |
| 0 | 0            | 0 | 0            | 0 | 0            | 0 | 0            |
| 0 | -0.042321735 | 0 | -0.063727422 | 0 | 0            | 0 | -0.056681159 |
| 0 | 0            | 0 | 0            | 0 | -0.052966042 | 0 | 0            |
| 0 | 0.061912713  | 0 | 0            | 0 | -0.056825452 | 0 | -0.003174996 |
| 0 | 0.0624243    | 0 | 0            | 0 | -0.055577632 | 0 | 0            |
| 0 | 0.06246681   | 0 | 0            | 0 | -0.055656001 | 0 | 0            |
| 0 | 0            | 0 | -0.058877749 | 0 | 0            | 0 | -0.004616379 |

|   |              |   |              |   |              |   |              |
|---|--------------|---|--------------|---|--------------|---|--------------|
| 0 | 0            | 0 | -0.057770185 | 0 | 0            | 0 | 0            |
| 0 | 0            | 0 | -0.057225856 | 0 | 0            | 0 | 0            |
| 0 | 0            | 0 | -0.050737201 | 0 | -0.006442715 | 0 | 0            |
| 0 | 0            | 0 | -0.055267339 | 0 | 0            | 0 | 0            |
| 0 | 0            | 0 | 0            | 0 | -0.057910916 | 0 | -0.003298015 |
| 0 | 0            | 0 | 0            | 0 | -0.056650409 | 0 | 0            |
| 0 | 0            | 0 | 0            | 0 | -0.056568442 | 0 | 0            |
| 0 | 0            | 0 | 0            | 0 | -0.055085967 | 0 | 0            |
| 0 | 0.076436177  | 0 | 0            | 0 | 0            | 0 | -0.024534161 |
| 0 | 0            | 0 | -0.036683525 | 0 | -0.022341596 | 0 | 0            |
| 0 | 0            | 0 | -0.069265584 | 0 | 0            | 0 | 0            |
| 0 | 0            | 0 | 0            | 0 | 0            | 0 | -0.024799469 |
| 0 | 0            | 0 | 0            | 0 | -0.069777727 | 0 | 0            |
| 0 | 0            | 0 | 0            | 0 | 0            | 0 | -0.023563552 |
| 0 | 0            | 0 | -0.071813609 | 0 | 0            | 0 | -0.022558384 |
| 0 | 0.36752523   | 0 | 0            | 0 | 0            | 0 | 0            |
| 0 | 0.084768953  | 0 | 0            | 0 | 0            | 0 | 0            |
| 0 | 0.3664953    | 0 | 0            | 0 | 0            | 0 | 0            |
| 0 | 0            | 0 | 0            | 0 | -0.071601851 | 0 | -0.0217174   |
| 0 | 0            | 0 | -0.076381962 | 0 | 0            | 0 | 0            |
| 0 | 0            | 0 | 0            | 0 | 0            | 0 | 0            |
| 0 | 0.076555169  | 0 | 0            | 0 | 0            | 0 | 0            |
| 0 | 0            | 0 | 0            | 0 | -0.076210673 | 0 | 0            |
| 0 | 0            | 0 | -0.02229081  | 0 | -0.040585602 | 0 | -0.045830105 |
| 0 | 0            | 0 | 0            | 0 | -0.062450432 | 0 | -0.045247054 |
| 0 | 0            | 0 | -0.061715901 | 0 | 0            | 0 | -0.045813111 |
| 0 | 0            | 0 | 0            | 0 | 0            | 0 | 0            |
| 0 | 0            | 0 | 0            | 0 | 0            | 0 | -0.017099698 |
| 0 | 0            | 0 | 0            | 0 | 0            | 0 | -0.015721124 |
| 0 | 0            | 0 | -0.043363636 | 0 | -0.024622235 | 0 | 0            |
| 0 | 0            | 0 | -0.068562113 | 0 | 0            | 0 | -0.011721819 |
| 0 | 0            | 0 | 0            | 0 | 0            | 0 | 0            |
| 0 | -0.005784324 | 0 | 0            | 0 | 0            | 0 | -0.015212102 |
| 0 | 0            | 0 | -0.054608582 | 0 | -0.017669129 | 0 | -0.006163391 |
| 0 | 0            | 0 | -0.071505106 | 0 | 0            | 0 | -0.007660837 |
| 0 | 0.001660638  | 0 | 0            | 0 | 0            | 0 | 0            |
| 0 | 0            | 0 | 0            | 0 | 0            | 0 | 0            |
| 0 | 0            | 0 | 0            | 0 | 0            | 0 | 0            |
| 0 | 0            | 0 | -0.050801785 | 0 | -0.019786214 | 0 | 0            |
| 0 | 0            | 0 | -0.049720696 | 0 | -0.020354652 | 0 | 0            |
| 0 | -0.020548811 | 0 | 0            | 0 | 0            | 0 | 0            |
| 0 | 0            | 0 | -0.068525555 | 0 | 0            | 0 | 0            |
| 0 | 0            | 0 | 0            | 0 | -0.067712757 | 0 | -0.010963821 |
| 0 | 0            | 0 | 0            | 0 | -0.070973525 | 0 | -0.006276158 |
| 0 | 0            | 0 | 0            | 0 | -0.067757436 | 0 | 0            |
| 0 | 0            | 0 | 0            | 0 | 0            | 0 | 0            |
| 0 | -0.001022221 | 0 | 0            | 0 | 0            | 0 | 0            |

|   |              |   |              |   |              |              |              |
|---|--------------|---|--------------|---|--------------|--------------|--------------|
| 0 | 0.10307689   | 0 | 0            | 0 | 0            | 0            | 0            |
| 0 | 0.36883355   | 0 | 0            | 0 | 0            | 0            | 0            |
| 0 | 0            | 0 | 0            | 0 | 0            | 0            | 0            |
| 0 | 0.36551431   | 0 | 0            | 0 | -0.065097129 | 0            | 0            |
| 0 | 0.099677036  | 0 | 0            | 0 | 0            | -0.013837996 | 0            |
| 0 | 0.3656018    | 0 | -0.064007636 | 0 | 0            | 0            | 0            |
| 0 | 0.1014708    | 0 | 0            | 0 | 0            | 0            | 0            |
| 0 | 0.3546346    | 0 | 0            | 0 | 0            | 0            | 0            |
| 0 | 0            | 0 | 0            | 0 | 0            | -0.013550767 | 0            |
| 0 | 0            | 0 | 0            | 0 | 0            | -0.02474309  | 0            |
| 0 | 0.36731596   | 0 | 0            | 0 | 0            | 0            | 0            |
| 0 | 0.36571157   | 0 | 0            | 0 | 0            | 0.006401813  | 0            |
| 0 | 0            | 0 | 0            | 0 | 0            | 0            | 0            |
| 0 | 0.086943964  | 0 | 0            | 0 | 0            | -0.007194037 | 0            |
| 0 | 0.087167477  | 0 | 0            | 0 | 0            | 0            | 0            |
| 0 | 0            | 0 | 0            | 0 | -0.066241773 | 0            | 0            |
| 0 | 0            | 0 | 0            | 0 | 0            | -0.029050768 | 0            |
| 0 | 0            | 0 | -0.017082983 | 0 | -0.049225739 | 0            | 0            |
| 0 | -0.02367976  | 0 | 0            | 0 | -0.066113958 | 0            | 0            |
| 0 | 0            | 0 | -0.065479711 | 0 | 0            | 0            | 0            |
| 0 | 0            | 0 | -0.065026323 | 0 | 0            | 0            | 0            |
| 0 | 0            | 0 | -0.081323175 | 0 | 0            | 0            | 0            |
| 0 | -0.02342691  | 0 | -0.017136985 | 0 | -0.049048315 | 0            | 0            |
| 0 | 0            | 0 | 0            | 0 | -0.081060838 | 0            | 0            |
| 0 | 0            | 0 | 0            | 0 | -0.06570682  | 0            | 0            |
| 0 | -0.022016622 | 0 | -0.065334503 | 0 | 0            | 0            | 0            |
| 0 | 0            | 0 | 0            | 0 | 0            | -0.007761231 | 0            |
| 0 | -0.023367492 | 0 | -0.064906281 | 0 | 0            | 0            | 0            |
| 0 | -0.021867725 | 0 | -0.081128507 | 0 | 0            | 0            | 0            |
| 0 | 0            | 0 | 0            | 0 | 0            | 0            | 0            |
| 0 | 0.39811583   | 0 | 0            | 0 | 0            | -0.059025781 | 0            |
| 0 | 0            | 0 | -0.071929894 | 0 | 0            | 0            | 0            |
| 0 | -0.022032815 | 0 | 0            | 0 | -0.080867485 | 0            | 0            |
| 0 | -0.022118632 | 0 | 0            | 0 | -0.065553921 | 0            | 0            |
| 0 | 0.094667846  | 0 | 0            | 0 | 0            | 0.003285772  | 0            |
| 0 | 0            | 0 | -0.075463928 | 0 | 0            | -0.027356586 | 0            |
| 0 | 0            | 0 | 0            | 0 | -0.075544584 | 0            | -0.026033357 |
| 0 | 0            | 0 | -0.066067873 | 0 | 0            | -0.012906403 | 0            |
| 0 | 0            | 0 | 0            | 0 | -0.071731298 | 0            | 0            |
| 0 | -0.030331461 | 0 | -0.075269798 | 0 | 0            | -0.026812378 | 0            |
| 0 | 0            | 0 | -0.079222083 | 0 | 0            | -0.011507329 | 0            |
| 0 | -0.03007321  | 0 | 0            | 0 | -0.075356051 | 0            | -0.025492748 |
| 0 | 0            | 0 | 0            | 0 | 0            | 0            | 0            |
| 0 | 0            | 0 | 0            | 0 | -0.065972972 | 0            | -0.012143382 |
| 0 | 0            | 0 | -0.015925751 | 0 | -0.049164445 | 0            | 0            |
| 0 | 0.36140829   | 0 | 0            | 0 | -0.072616053 | 0            | 0            |
| 0 | 0            | 0 | -0.047205172 | 0 | -0.033570163 | 0            | 0            |

|   |              |   |              |   |              |   |              |   |
|---|--------------|---|--------------|---|--------------|---|--------------|---|
| 0 | 0            | 0 | 0            | 0 | -0.078793884 | 0 | -0.010624678 | 0 |
| 0 | 0.36140017   | 0 | -0.071861396 | 0 | 0            | 0 | 0            | 0 |
| 0 | 0            | 0 | -0.04255711  | 0 | -0.022249422 | 0 | 0            | 0 |
| 0 | 0            | 0 | 0            | 0 | 0            | 0 | 0.003385706  | 0 |
| 0 | 0            | 0 | -0.040650194 | 0 | -0.033255043 | 0 | -0.020962849 | 0 |
| 0 | 0            | 0 | 0            | 0 | 0            | 0 | -0.058504135 | 0 |
| 0 | 0            | 0 | -0.032472442 | 0 | -0.041544566 | 0 | 0            | 0 |
| 0 | 0            | 0 | 0            | 0 | -0.086384102 | 0 | 0            | 0 |
| 0 | -0.022173717 | 0 | -0.03247944  | 0 | -0.041387978 | 0 | 0            | 0 |
| 0 | 0            | 0 | -0.085439817 | 0 | 0            | 0 | 0            | 0 |
| 0 | -0.013966222 | 0 | 0            | 0 | -0.086232287 | 0 | 0            | 0 |
| 0 | -0.037680041 | 0 | 0            | 0 | 0            | 0 | -0.057611092 | 0 |
| 0 | -0.013938805 | 0 | -0.085289785 | 0 | 0            | 0 | 0            | 0 |
| 0 | 0            | 0 | -0.039275099 | 0 | -0.046735094 | 0 | 0            | 0 |
| 0 | 0.35539399   | 0 | -0.086302362 | 0 | 0            | 0 | 0            | 0 |
| 0 | 0            | 0 | 0            | 0 | -0.085735562 | 0 | -0.001329949 | 0 |
| 0 | 0            | 0 | 0            | 0 | -0.086186903 | 0 | 0            | 0 |
| 0 | 0            | 0 | -0.084950806 | 0 | 0            | 0 | -0.001788643 | 0 |
| 0 | 0            | 0 | -0.085259093 | 0 | 0            | 0 | 0            | 0 |
| 0 | 0.35580044   | 0 | 0            | 0 | -0.086733946 | 0 | 0            | 0 |
| 0 | 0.35737542   | 0 | -0.046315624 | 0 | -0.039466379 | 0 | 0            | 0 |
| 0 | 0.35815233   | 0 | -0.08389851  | 0 | 0            | 0 | 0            | 0 |
| 0 | 0.35770414   | 0 | -0.085015204 | 0 | 0            | 0 | -0.001540955 | 0 |
| 0 | 0.35749086   | 0 | -0.084071193 | 0 | 0            | 0 | 0            | 0 |
| 0 | 0.3585596    | 0 | 0            | 0 | -0.084510631 | 0 | 0            | 0 |
| 0 | 0.35639648   | 0 | 0            | 0 | -0.083982249 | 0 | 0            | 0 |
| 0 | 0.35777343   | 0 | 0            | 0 | -0.085180088 | 0 | -6.96E-05    | 0 |
| 0 | 0            | 0 | -0.078877825 | 0 | 0            | 0 | 0            | 0 |
| 0 | 0            | 0 | 0            | 0 | -0.078785169 | 0 | 0            | 0 |
| 0 | -0.0178862   | 0 | -0.078609736 | 0 | 0            | 0 | 0            | 0 |
| 0 | -0.018094277 | 0 | 0            | 0 | -0.078512151 | 0 | 0            | 0 |
| 0 | 0            | 0 | -0.051858941 | 0 | -0.036329864 | 0 | 0            | 0 |
| 0 | 0            | 0 | -0.084766556 | 0 | 0            | 0 | 0.005991533  | 0 |
| 0 | 0            | 0 | -0.043458003 | 0 | -0.034648025 | 0 | 0            | 0 |
| 0 | -0.019786824 | 0 | -0.051952611 | 0 | -0.036103944 | 0 | 0            | 0 |
| 0 | 0            | 0 | 0            | 0 | -0.084862215 | 0 | 0.007219675  | 0 |
| 0 | -0.016897524 | 0 | -0.084441163 | 0 | 0            | 0 | 0.006553503  | 0 |
| 0 | 0            | 0 | -0.07685389  | 0 | 0            | 0 | 0.003481551  | 0 |
| 0 | 0            | 0 | 0            | 0 | -0.076728768 | 0 | 0.004203672  | 0 |
| 0 | -0.016767652 | 0 | 0            | 0 | -0.084536212 | 0 | 0.007776818  | 0 |
| 0 | 0            | 0 | -0.04484162  | 0 | -0.041058311 | 0 | 0            | 0 |
| 0 | 0            | 0 | -0.045402002 | 0 | -0.04008161  | 0 | 0            | 0 |
| 0 | 0            | 0 | -0.047528681 | 0 | -0.039346055 | 0 | -0.001168985 | 0 |
| 0 | 0            | 0 | -0.047419972 | 0 | -0.036174065 | 0 | 0.009989146  | 0 |
| 0 | 0            | 0 | -0.086021487 | 0 | 0            | 0 | -0.004672368 | 0 |
| 0 | 0            | 0 | -0.084157975 | 0 | 0            | 0 | -0.004374874 | 0 |
| 0 | -0.021633852 | 0 | -0.044854213 | 0 | -0.04088363  | 0 | 0            | 0 |



|   |              |   |              |   |              |   |              |   |
|---|--------------|---|--------------|---|--------------|---|--------------|---|
| 0 | -0.021617103 | 0 | -0.045338122 | 0 | -0.039962142 | 0 | 0            | 0 |
| 0 | -0.02184911  | 0 | -0.047284031 | 0 | -0.039294927 | 0 | -0.000891869 | 0 |
| 0 | 0            | 0 | -0.084875448 | 0 | 0            | 0 | 0            | 0 |
| 0 | 0            | 0 | 0            | 0 | -0.086422742 | 0 | -0.004079677 | 0 |
| 0 | 0            | 0 | 0            | 0 | -0.084054887 | 0 | -0.003564149 | 0 |
| 0 | 0            | 0 | 0            | 0 | -0.085347437 | 0 | 0            | 0 |
| 0 | -0.022680686 | 0 | -0.085688295 | 0 | 0            | 0 | -0.004127948 | 0 |
| 0 | -0.022610855 | 0 | -0.083979275 | 0 | 0            | 0 | -0.003873629 | 0 |
| 0 | -0.021407532 | 0 | -0.084644326 | 0 | 0            | 0 | 0            | 0 |
| 0 | -0.022699505 | 0 | 0            | 0 | -0.086085436 | 0 | -0.003536462 | 0 |
| 0 | -0.022552476 | 0 | 0            | 0 | -0.083878323 | 0 | -0.003065541 | 0 |
| 0 | -0.021610492 | 0 | 0            | 0 | -0.085107338 | 0 | 0            | 0 |
| 0 | 0            | 0 | -0.045139236 | 0 | -0.039776642 | 0 | 0            | 0 |
| 0 | 0            | 0 | -0.044736396 | 0 | -0.039417797 | 0 | -4.89E-05    | 0 |
| 0 | 0            | 0 | -0.045106731 | 0 | -0.038707626 | 0 | 0.000962122  | 0 |
| 0 | 0            | 0 | -0.083176195 | 0 | 0            | 0 | 0.000217054  | 0 |
| 0 | 0            | 0 | 0            | 0 | -0.083526579 | 0 | 0.000785431  | 0 |
| 0 | 0            | 0 | 0            | 0 | 0            | 0 | -0.01287546  | 0 |
| 0 | 0            | 0 | 0            | 0 | 0            | 0 | 0            | 0 |
| 0 | 0            | 0 | 0            | 0 | 0            | 0 | -0.016514428 | 0 |
| 0 | 0            | 0 | 0            | 0 | 0            | 0 | -0.007782448 | 0 |
| 0 | 0.38853707   | 0 | 0            | 0 | 0            | 0 | 0            | 0 |
| 0 | 0.37664657   | 0 | 0            | 0 | 0            | 0 | 0            | 0 |
| 0 | 0            | 0 | 0            | 0 | 0            | 0 | 0            | 0 |
| 0 | -0.016751925 | 0 | 0            | 0 | 0            | 0 | 0            | 0 |
| 0 | 0            | 0 | 0            | 0 | 0            | 0 | -0.007455069 | 0 |
| 0 | -0.018251297 | 0 | 0            | 0 | 0            | 0 | -0.006875726 | 0 |
| 0 | 0            | 0 | 0            | 0 | 0            | 0 | -0.0076291   | 0 |
| 0 | 0.38826003   | 0 | 0            | 0 | 0            | 0 | -0.020937668 | 0 |
| 0 | 0.39980679   | 0 | 0            | 0 | 0            | 0 | 0            | 0 |
| 0 | 0            | 0 | 0            | 0 | 0            | 0 | -0.05125783  | 0 |
| 0 | 0            | 0 | 0            | 0 | 0            | 0 | -0.054202759 | 0 |
| 0 | -0.047538987 | 0 | 0            | 0 | 0            | 0 | -0.05314202  | 0 |
| 0 | 0            | 0 | 0            | 0 | 0            | 0 | -0.01935655  | 0 |
| 0 | -0.020793666 | 0 | 0            | 0 | 0            | 0 | -0.018714914 | 0 |
| 0 | 0.33286224   | 0 | 0            | 0 | 0            | 0 | 0            | 0 |
| 0 | 0            | 0 | -0.026235184 | 0 | 0            | 0 | -0.040116069 | 0 |
| 0 | 0            | 0 | 0            | 0 | 0            | 0 | -0.041867602 | 0 |
| 0 | 0            | 0 | 0            | 0 | -0.025542203 | 0 | -0.039959261 | 0 |
| 0 | 0.48979499   | 0 | 0            | 0 | 0            | 0 | 0            | 0 |
| 0 | 0            | 0 | 0            | 0 | 0            | 0 | 0.002001381  | 0 |
| 0 | 0            | 0 | 0            | 0 | 0            | 0 | 0            | 0 |
| 0 | -0.007745456 | 0 | 0            | 0 | 0            | 0 | 0.002546457  | 0 |
| 0 | -0.008144225 | 0 | 0            | 0 | 0            | 0 | 0            | 0 |
| 0 | 0            | 0 | 0            | 0 | 0            | 0 | 0.003707773  | 0 |
| 0 | 0            | 0 | 0            | 0 | 0            | 0 | -0.041708416 | 0 |
| 0 | 0            | 0 | -0.029232398 | 0 | 0            | 0 | 0            | 0 |

|   |              |   |              |   |              |   |              |   |
|---|--------------|---|--------------|---|--------------|---|--------------|---|
| 0 | 0            | 0 | 0            | 0 | -0.028661737 | 0 | 0            | 0 |
| 0 | 0.33592574   | 0 | 0            | 0 | 0            | 0 | 0            | 0 |
| 0 | 0            | 0 | -0.030222595 | 0 | 0            | 0 | 0            | 0 |
| 0 | 0            | 0 | 0            | 0 | -0.030078523 | 0 | 0            | 0 |
| 0 | 0            | 0 | 0            | 0 | 0            | 0 | 0            | 0 |
| 0 | -0.030858468 | 0 | -0.030071241 | 0 | 0            | 0 | 0            | 0 |
| 0 | -0.030914545 | 0 | 0            | 0 | -0.029916376 | 0 | 0            | 0 |
| 0 | 0            | 0 | 0            | 0 | 0            | 0 | -0.055323423 | 0 |
| 0 | 0            | 0 | -0.031067452 | 0 | 0            | 0 | 0            | 0 |
| 0 | 0            | 0 | 0            | 0 | -0.03122896  | 0 | 0            | 0 |
| 0 | 0            | 0 | 0            | 0 | 0            | 0 | 0            | 0 |
| 0 | 0.002688932  | 0 | 0            | 0 | 0            | 0 | 0            | 0 |
| 0 | 0            | 0 | 0            | 0 | 0            | 0 | 0            | 0 |
| 0 | 0            | 0 | 0            | 0 | 0            | 0 | 0.001690135  | 0 |
| 0 | 0            | 0 | 0            | 0 | 0            | 0 | 0            | 0 |
| 0 | -0.014343246 | 0 | 0            | 0 | 0            | 0 | 0.002202517  | 0 |
| 0 | 0.35916564   | 0 | 0            | 0 | 0            | 0 | -0.00344271  | 0 |
| 0 | -0.0257022   | 0 | 0            | 0 | 0            | 0 | 0            | 0 |
| 0 | 0            | 0 | 0            | 0 | 0            | 0 | 0            | 0 |
| 0 | 0            | 0 | 0            | 0 | 0            | 0 | 0            | 0 |
| 0 | 0            | 0 | -0.05755593  | 0 | 0            | 0 | -0.054096927 | 0 |
| 0 | 0            | 0 | 0            | 0 | -0.05715055  | 0 | -0.053563832 | 0 |
| 0 | -0.029553482 | 0 | 0            | 0 | 0            | 0 | 0            | 0 |
| 0 | 0            | 0 | -0.020057361 | 0 | -0.009109484 | 0 | 0            | 0 |
| 0 | 0            | 0 | -0.028708552 | 0 | 0            | 0 | 0            | 0 |
| 0 | 0            | 0 | 0            | 0 | -0.028486522 | 0 | 0            | 0 |
| 0 | 0            | 0 | 0            | 0 | 0            | 0 | -0.048743659 | 0 |
| 0 | 0            | 0 | 0            | 0 | -0.053859292 | 0 | -0.040100109 | 0 |
| 0 | 0            | 0 | 0            | 0 | -0.0513916   | 0 | 0            | 0 |
| 0 | 0            | 0 | -0.053372649 | 0 | 0            | 0 | -0.040524184 | 0 |
| 0 | 0            | 0 | -0.051060664 | 0 | 0            | 0 | 0            | 0 |
| 0 | 0.37973114   | 0 | 0            | 0 | 0            | 0 | 0.027774911  | 0 |
| 0 | 0.38754948   | 0 | 0            | 0 | 0            | 0 | 0            | 0 |
| 0 | 0            | 0 | 0            | 0 | -0.048548533 | 0 | 0            | 0 |
| 0 | 0            | 0 | -0.048106444 | 0 | 0            | 0 | 0            | 0 |
| 0 | 0            | 0 | 0            | 0 | 0            | 0 | 0.020463518  | 0 |
| 0 | 0.000570355  | 0 | 0            | 0 | 0            | 0 | 0.020886178  | 0 |
| 0 | 0.3833245    | 0 | 0            | 0 | 0            | 0 | 0.020047513  | 0 |
| 0 | 0            | 0 | 0            | 0 | 0            | 0 | 0            | 0 |
| 0 | 0.054088619  | 0 | 0            | 0 | 0            | 0 | 0            | 0 |
| 0 | 0            | 0 | 0            | 0 | -0.058595788 | 0 | 0            | 0 |
| 0 | 0            | 0 | -0.057716257 | 0 | 0            | 0 | 0            | 0 |
| 0 | -0.017036957 | 0 | 0            | 0 | -0.058241101 | 0 | 0            | 0 |
| 0 | 0.37733838   | 0 | 0            | 0 | 0            | 0 | -0.060831799 | 0 |
| 0 | -0.016768524 | 0 | -0.057370815 | 0 | 0            | 0 | 0            | 0 |
| 0 | 0            | 0 | 0            | 0 | 0            | 0 | 0            | 0 |
| 0 | 0.057098075  | 0 | 0            | 0 | 0            | 0 | -0.051441167 | 0 |

|   |              |   |              |   |              |   |              |   |
|---|--------------|---|--------------|---|--------------|---|--------------|---|
| 0 | 0            | 0 | -0.017149119 | 0 | -0.039978419 | 0 | 0            | 0 |
| 0 | 0.050491603  | 0 | -0.052868339 | 0 | 0            | 0 | 0            | 0 |
| 0 | 0            | 0 | 0            | 0 | 0            | 0 | -0.057363865 | 0 |
| 0 | 0.04942576   | 0 | 0            | 0 | -0.052695    | 0 | 0            | 0 |
| 0 | 0            | 0 | 0            | 0 | 0            | 0 | -0.052274598 | 0 |
| 0 | 0            | 0 | 0            | 0 | 0            | 0 | -0.059688829 | 0 |
| 0 | 0            | 0 | -0.054138896 | 0 | 0            | 0 | 0            | 0 |
| 0 | 0            | 0 | 0            | 0 | 0            | 0 | -0.051024422 | 0 |
| 0 | 0            | 0 | 0            | 0 | 0            | 0 | -0.060224686 | 0 |
| 0 | 0            | 0 | 0            | 0 | -0.054050103 | 0 | 0            | 0 |
| 0 | 0            | 0 | -0.011917638 | 0 | 0            | 0 | -0.057244092 | 0 |
| 0 | 0            | 0 | 0            | 0 | -0.010762502 | 0 | -0.057177113 | 0 |
| 0 | -0.017333616 | 0 | 0            | 0 | 0            | 0 | -0.059384707 | 0 |
| 0 | -0.026995932 | 0 | 0            | 0 | 0            | 0 | -0.050005214 | 0 |
| 0 | -0.042610334 | 0 | 0            | 0 | 0            | 0 | -0.058795129 | 0 |
| 0 | 0            | 0 | -0.013235025 | 0 | 0            | 0 | -0.060152244 | 0 |
| 0 | 0            | 0 | 0            | 0 | -0.012607046 | 0 | -0.06007087  | 0 |
| 0 | 0            | 0 | 0            | 0 | 0            | 0 | -0.057671607 | 0 |
| 0 | 0            | 0 | 0            | 0 | 0            | 0 | -0.060733901 | 0 |
| 0 | 0            | 0 | 0            | 0 | 0            | 0 | 0            | 0 |
| 0 | -0.047790487 | 0 | -0.013238039 | 0 | 0            | 0 | -0.059275256 | 0 |
| 0 | -0.047765762 | 0 | 0            | 0 | -0.012609673 | 0 | -0.0591935   | 0 |
| 0 | -0.005803002 | 0 | 0            | 0 | 0            | 0 | 0            | 0 |
| 0 | -0.047424008 | 0 | 0            | 0 | 0            | 0 | -0.059850383 | 0 |
| 0 | 0            | 0 | -0.032465202 | 0 | -0.03131889  | 0 | 0            | 0 |
| 0 | 0            | 0 | 0            | 0 | -0.063056108 | 0 | 0            | 0 |
| 0 | 0            | 0 | -0.062812246 | 0 | 0            | 0 | 0            | 0 |
| 0 | 0            | 0 | 0            | 0 | 0            | 0 | -0.051507845 | 0 |
| 0 | 0            | 0 | 0            | 0 | 0            | 0 | -0.063066643 | 0 |
| 0 | 0            | 0 | 0            | 0 | 0            | 0 | -0.059204035 | 0 |
| 0 | 0.4905945    | 0 | 0            | 0 | 0            | 0 | 0            | 0 |
| 0 | 0            | 0 | -0.014925214 | 0 | 0            | 0 | -0.047864255 | 0 |
| 0 | 0            | 0 | 0            | 0 | -0.014735948 | 0 | -0.047761154 | 0 |
| 0 | 0.49183536   | 0 | 0            | 0 | 0            | 0 | 0            | 0 |
| 0 | 0            | 0 | -0.033805735 | 0 | 0            | 0 | -0.058974408 | 0 |
| 0 | 0            | 0 | 0            | 0 | -0.033775308 | 0 | -0.058617352 | 0 |
| 0 | 0            | 0 | 0            | 0 | -0.076621215 | 0 | -0.049584088 | 0 |
| 0 | 0            | 0 | -0.076150167 | 0 | 0            | 0 | -0.050156879 | 0 |
| 0 | -0.043374915 | 0 | 0            | 0 | -0.076432033 | 0 | -0.048525    | 0 |
| 0 | -0.04330379  | 0 | -0.075962631 | 0 | 0            | 0 | -0.049096275 | 0 |
| 0 | 0.035089518  | 0 | 0            | 0 | 0            | 0 | -0.056682237 | 0 |
| 0 | 0            | 0 | 0            | 0 | -0.031339383 | 0 | -0.052662784 | 0 |
| 0 | 0            | 0 | -0.031196245 | 0 | 0            | 0 | -0.052953368 | 0 |
| 0 | 0            | 0 | 0            | 0 | 0            | 0 | -0.057302662 | 0 |
| 0 | 0            | 0 | -0.011780197 | 0 | 0            | 0 | -0.047551796 | 0 |
| 0 | 0            | 0 | -0.014688497 | 0 | 0.002923766  | 0 | -0.047424131 | 0 |
| 0 | 0            | 0 | 0            | 0 | -0.011129312 | 0 | -0.047479819 | 0 |

|   |              |   |              |   |              |              |              |
|---|--------------|---|--------------|---|--------------|--------------|--------------|
| 0 | 0.074310893  | 0 | 0            | 0 | 0            | 0            | 0            |
| 0 | 0            | 0 | 0            | 0 | 0            | -0.061305212 | 0            |
| 0 | -0.023423947 | 0 | 0            | 0 | 0            | -0.060503606 | 0            |
| 0 | 0.49858854   | 0 | 0            | 0 | -0.077987092 | 0            | 0            |
| 0 | 0            | 0 | 0            | 0 | 0            | 0            | 0            |
| 0 | 0.49870987   | 0 | -0.077181064 | 0 | 0            | 0            | 0            |
| 0 | 0.36668876   | 0 | 0            | 0 | 0            | 0            | 0            |
| 0 | 0.36531717   | 0 | 0            | 0 | 0            | 0            | 0            |
| 0 | 0            | 0 | -0.016743031 | 0 | 0            | 0            | 0            |
| 0 | 0            | 0 | 0            | 0 | -0.016763382 | 0            | 0            |
| 0 | 0            | 0 | 0            | 0 | 0            | 0            | 0            |
| 0 | 0.3635271    | 0 | -0.014411228 | 0 | 0            | 0            | 0            |
| 0 | 0.36362052   | 0 | 0            | 0 | -0.014409454 | 0            | 0            |
| 0 | 0            | 0 | 0            | 0 | -0.043804817 | 0            | -0.055998047 |
| 0 | 0            | 0 | -0.043096852 | 0 | 0            | 0            | -0.056336132 |
| 0 | 0            | 0 | -0.031678569 | 0 | -0.043431075 | 0            | -0.038001548 |
| 0 | 0.009700166  | 0 | 0            | 0 | 0            | 0            | 0            |
| 0 | 0            | 0 | 0            | 0 | 0            | 0            | 0            |
| 0 | 0.36741584   | 0 | 0            | 0 | 0            | 0            | 0            |
| 0 | -0.031228371 | 0 | 0            | 0 | -0.043608682 | 0            | -0.055175403 |
| 0 | 0            | 0 | 0            | 0 | -0.074245947 | 0            | -0.037595743 |
| 0 | -0.03113597  | 0 | -0.042902606 | 0 | 0            | 0            | -0.055512088 |
| 0 | 0            | 0 | -0.073741504 | 0 | 0            | 0            | -0.038244393 |
| 0 | 0            | 0 | 0            | 0 | -0.017701756 | 0            | 0            |
| 0 | 0            | 0 | -0.017352845 | 0 | 0            | 0            | 0            |
| 0 | 0            | 0 | 0            | 0 | 0            | 0            | 0            |
| 0 | -0.022374584 | 0 | 0            | 0 | -0.017692624 | 0            | 0            |
| 0 | -0.022371031 | 0 | -0.017344446 | 0 | 0            | 0            | 0            |
| 0 | -0.018692246 | 0 | 0            | 0 | 0            | 0            | 0            |
| 0 | 0            | 0 | 0            | 0 | -0.017047134 | 0            | 0            |
| 0 | 0            | 0 | -0.016856096 | 0 | 0            | 0            | 0            |
| 0 | 0            | 0 | -0.014597222 | 0 | 0            | 0            | 0            |
| 0 | 0            | 0 | 0            | 0 | -0.014294834 | 0            | 0            |
| 0 | 0            | 0 | -0.014410588 | 0 | 0            | 0            | 0            |
| 0 | 0.002405644  | 0 | -0.014194065 | 0 | 0            | 0            | 0            |
| 0 | 0            | 0 | -0.013206882 | 0 | -0.001118147 | 0            | 0            |
| 0 | 0            | 0 | 0            | 0 | -0.014080278 | 0            | 0            |
| 0 | 0.002118708  | 0 | 0            | 0 | -0.013797409 | 0            | 0            |
| 0 | 0.003991384  | 0 | 0            | 0 | 0            | 0            | 0            |
| 0 | 0            | 0 | 0            | 0 | 0            | 0            | 0            |
| 0 | 0            | 0 | -0.006501248 | 0 | -0.010968422 | 0            | 0            |
| 0 | 0            | 0 | -0.015309154 | 0 | 0            | 0            | 0            |
| 0 | 0            | 0 | 0            | 0 | -0.015369011 | 0            | 0            |
| 0 | 0            | 0 | -0.009258672 | 0 | -0.006125493 | 0            | 0            |
| 0 | 0.038941318  | 0 | -0.038350197 | 0 | 0            | 0            | -0.057306155 |
| 0 | 0            | 0 | -0.011281697 | 0 | -0.030177395 | 0            | -0.047595621 |
| 0 | -0.027732495 | 0 | -0.015253006 | 0 | 0            | 0            | 0            |

|   |              |   |              |   |              |   |              |   |
|---|--------------|---|--------------|---|--------------|---|--------------|---|
| 0 | -0.027771161 | 0 | 0            | 0 | -0.015303635 | 0 | 0            | 0 |
| 0 | -0.027691266 | 0 | -0.009326698 | 0 | -0.005998903 | 0 | 0            | 0 |
| 0 | 0.038440013  | 0 | 0            | 0 | -0.037837866 | 0 | -0.057028378 | 0 |
| 0 | 0            | 0 | -0.027862138 | 0 | -0.05136852  | 0 | 0            | 0 |
| 0 | 0            | 0 | 0            | 0 | -0.078625741 | 0 | 0            | 0 |
| 0 | 0            | 0 | -0.039328768 | 0 | 0            | 0 | -0.05790231  | 0 |
| 0 | 0.38468745   | 0 | 0            | 0 | 0            | 0 | -0.057206482 | 0 |
| 0 | 0            | 0 | 0            | 0 | -0.033174478 | 0 | 0            | 0 |
| 0 | 0            | 0 | -0.032764573 | 0 | 0            | 0 | 0            | 0 |
| 0 | 0            | 0 | -0.077717681 | 0 | 0            | 0 | 0            | 0 |
| 0 | 0            | 0 | 0            | 0 | -0.03887421  | 0 | -0.057617473 | 0 |
| 0 | -0.027161668 | 0 | -0.02788336  | 0 | -0.051119208 | 0 | 0            | 0 |
| 0 | -0.027321989 | 0 | 0            | 0 | -0.07839426  | 0 | 0            | 0 |
| 0 | 0.040367308  | 0 | 0            | 0 | -0.031374049 | 0 | 0            | 0 |
| 0 | -0.026997473 | 0 | -0.077495878 | 0 | 0            | 0 | 0            | 0 |
| 0 | 0.041285274  | 0 | -0.031033504 | 0 | 0            | 0 | 0            | 0 |
| 0 | 0.045649342  | 0 | 0            | 0 | 0            | 0 | 0            | 0 |
| 0 | 0            | 0 | 0            | 0 | -0.032304435 | 0 | 0            | 0 |
| 0 | 0            | 0 | -0.031900776 | 0 | 0            | 0 | 0            | 0 |
| 0 | 0            | 0 | -0.045505548 | 0 | 0            | 0 | -0.061650392 | 0 |
| 0 | 0            | 0 | -0.02956165  | 0 | -0.016370695 | 0 | -0.061871524 | 0 |
| 0 | 0            | 0 | 0            | 0 | 0            | 0 | 0            | 0 |
| 0 | 0            | 0 | 0            | 0 | -0.045350884 | 0 | -0.06115722  | 0 |
| 0 | 0            | 0 | -0.00920375  | 0 | -0.00521298  | 0 | 0            | 0 |
| 0 | 0.36649091   | 0 | 0            | 0 | 0            | 0 | 0            | 0 |
| 0 | 0.38026745   | 0 | 0            | 0 | 0            | 0 | -0.05891454  | 0 |
| 0 | 0            | 0 | -0.027073868 | 0 | -0.050303977 | 0 | 0            | 0 |
| 0 | 0            | 0 | -0.011240361 | 0 | -0.027593891 | 0 | 0            | 0 |
| 0 | 0            | 0 | 0            | 0 | -0.036646857 | 0 | 0            | 0 |
| 0 | -0.008152049 | 0 | 0            | 0 | -0.036357416 | 0 | 0            | 0 |
| 0 | 0            | 0 | -0.035873594 | 0 | 0            | 0 | 0            | 0 |
| 0 | -0.00790339  | 0 | -0.035596799 | 0 | 0            | 0 | 0            | 0 |
| 0 | 0            | 0 | -0.009590509 | 0 | -0.026146297 | 0 | 0            | 0 |
| 0 | 0.056054418  | 0 | 0            | 0 | 0            | 0 | -0.057571849 | 0 |
| 0 | 0.36807279   | 0 | 0            | 0 | 0            | 0 | 0            | 0 |
| 0 | 0.36128303   | 0 | 0            | 0 | -0.044223056 | 0 | 0            | 0 |
| 0 | 0            | 0 | 0            | 0 | 0            | 0 | -0.058163308 | 0 |
| 0 | 0.36144537   | 0 | -0.04307235  | 0 | 0            | 0 | 0            | 0 |
| 0 | 0            | 0 | -0.049380197 | 0 | 0            | 0 | -0.026284746 | 0 |
| 0 | 0            | 0 | 0            | 0 | -0.048276791 | 0 | -0.025306439 | 0 |
| 0 | 0.044241788  | 0 | -0.039816222 | 0 | 0            | 0 | 0            | 0 |
| 0 | 0.043978649  | 0 | 0            | 0 | -0.039001074 | 0 | 0            | 0 |
| 0 | 0            | 0 | -0.04068015  | 0 | 0            | 0 | 0            | 0 |
| 0 | 0.51164469   | 0 | 0            | 0 | 0            | 0 | -0.05256447  | 0 |
| 0 | 0            | 0 | 0            | 0 | -0.039921094 | 0 | 0            | 0 |
| 0 | 0            | 0 | -0.006399136 | 0 | -0.038690503 | 0 | 0            | 0 |
| 0 | 0            | 0 | -0.054047164 | 0 | 0            | 0 | 0            | 0 |

|   |              |   |              |   |              |   |              |   |
|---|--------------|---|--------------|---|--------------|---|--------------|---|
| 0 | -0.012521676 | 0 | -0.00638846  | 0 | -0.038472806 | 0 | 0            | 0 |
| 0 | 0            | 0 | -0.048084503 | 0 | 0            | 0 | 0            | 0 |
| 0 | 0            | 0 | 0            | 0 | -0.052860053 | 0 | 0            | 0 |
| 0 | 0            | 0 | 0            | 0 | -0.048215045 | 0 | 0            | 0 |
| 0 | 0            | 0 | -0.066398493 | 0 | 0            | 0 | 0            | 0 |
| 0 | 0            | 0 | 0            | 0 | -0.066630091 | 0 | 0            | 0 |
| 0 | 0            | 0 | -0.055277854 | 0 | 0            | 0 | -0.029498474 | 0 |
| 0 | 0            | 0 | -0.037805361 | 0 | -0.009929298 | 0 | 0            | 0 |
| 0 | 0.35920297   | 0 | -0.039743236 | 0 | 0            | 0 | 0            | 0 |
| 0 | 0            | 0 | 0            | 0 | -0.055346591 | 0 | -0.028958596 | 0 |
| 0 | 0.35951867   | 0 | 0            | 0 | -0.039789427 | 0 | 0            | 0 |
| 0 | 0.069229916  | 0 | 0            | 0 | 0            | 0 | 0            | 0 |
| 0 | 0.057416837  | 0 | 0            | 0 | 0            | 0 | -0.020092899 | 0 |
| 0 | 0.36057588   | 0 | 0            | 0 | 0            | 0 | 0            | 0 |
| 0 | 0.059873218  | 0 | -0.055166278 | 0 | 0            | 0 | 0            | 0 |
| 0 | 0.051992235  | 0 | -0.049243097 | 0 | 0            | 0 | -0.028055907 | 0 |
| 0 | 0            | 0 | 0            | 0 | 0            | 0 | 0            | 0 |
| 0 | 0.057600247  | 0 | -0.039714888 | 0 | 0            | 0 | 0            | 0 |
| 0 | 0.05669692   | 0 | 0            | 0 | -0.039831874 | 0 | 0            | 0 |
| 0 | 0            | 0 | 0            | 0 | 0            | 0 | -0.020316092 | 0 |
| 0 | 0.35242044   | 0 | -0.051427044 | 0 | 0            | 0 | 0            | 0 |
| 0 | 0.059466127  | 0 | 0            | 0 | -0.053713168 | 0 | 0            | 0 |
| 0 | 0.056956899  | 0 | -0.024770862 | 0 | -0.015321842 | 0 | 0            | 0 |
| 0 | 0            | 0 | -0.056126274 | 0 | 0            | 0 | 0            | 0 |
| 0 | 0.3527464    | 0 | 0            | 0 | -0.051334482 | 0 | 0            | 0 |
| 0 | 0.05197437   | 0 | 0            | 0 | -0.048045437 | 0 | -0.027088929 | 0 |
| 0 | 0            | 0 | -0.054981608 | 0 | 0            | 0 | -0.021494118 | 0 |
| 0 | 0            | 0 | -0.050241939 | 0 | 0            | 0 | -0.028417556 | 0 |
| 0 | 0            | 0 | -0.040657114 | 0 | 0            | 0 | 0            | 0 |
| 0 | 0            | 0 | 0            | 0 | 0            | 0 | -0.03525216  | 0 |
| 0 | 0            | 0 | 0            | 0 | -0.040841388 | 0 | 0            | 0 |
| 0 | 0.063409306  | 0 | 0            | 0 | 0            | 0 | 0            | 0 |
| 0 | -0.015203573 | 0 | -0.05463843  | 0 | 0            | 0 | -0.02094943  | 0 |
| 0 | 0            | 0 | 0            | 0 | -0.054334726 | 0 | -0.020496734 | 0 |
| 0 | 0            | 0 | -0.024655299 | 0 | -0.016429047 | 0 | 0            | 0 |
| 0 | 0            | 0 | 0            | 0 | -0.054735871 | 0 | 0            | 0 |
| 0 | 0            | 0 | -0.055666742 | 0 | 0            | 0 | -0.014630637 | 0 |
| 0 | 0            | 0 | 0            | 0 | -0.049093486 | 0 | -0.027435413 | 0 |
| 0 | -0.014981075 | 0 | 0            | 0 | -0.053989444 | 0 | -0.019957713 | 0 |
| 0 | 0            | 0 | -0.042928928 | 0 | -0.010195118 | 0 | -0.0180139   | 0 |
| 0 | 0            | 0 | 0            | 0 | -0.054646828 | 0 | -0.014042093 | 0 |
| 0 | 0            | 0 | 0            | 0 | 0            | 0 | 0            | 0 |
| 0 | 0            | 0 | -0.057878413 | 0 | 0            | 0 | 0            | 0 |
| 0 | 0            | 0 | 0            | 0 | 0            | 0 | -0.05252045  | 0 |
| 0 | 0            | 0 | -0.052407205 | 0 | 0            | 0 | 0            | 0 |
| 0 | 0            | 0 | -0.029117289 | 0 | -0.023482874 | 0 | 0            | 0 |
| 0 | 0            | 0 | 0            | 0 | -0.05281327  | 0 | 0            | 0 |

|   |              |   |              |   |              |   |              |
|---|--------------|---|--------------|---|--------------|---|--------------|
| 0 | -0.008987283 | 0 | -0.057544343 | 0 | 0            | 0 | 0            |
| 0 | -0.005386724 | 0 | -0.052138819 | 0 | 0            | 0 | 0            |
| 0 | 0.3552272    | 0 | -0.046811169 | 0 | 0            | 0 | 0            |
| 0 | -0.005402229 | 0 | 0            | 0 | -0.052544949 | 0 | 0            |
| 0 | 0            | 0 | -0.043409437 | 0 | -0.013607754 | 0 | 0            |
| 0 | 0            | 0 | 0            | 0 | -0.057095654 | 0 | 0            |
| 0 | 0.071607967  | 0 | -0.053586299 | 0 | 0            | 0 | 0            |
| 0 | 0.080425286  | 0 | -0.065590549 | 0 | 0            | 0 | 0            |
| 0 | 0            | 0 | -0.064899133 | 0 | 0            | 0 | -0.024390192 |
| 0 | -0.009069626 | 0 | 0            | 0 | -0.056751888 | 0 | 0            |
| 0 | 0.35564052   | 0 | 0            | 0 | -0.046407447 | 0 | 0            |
| 0 | 0.07123612   | 0 | 0            | 0 | -0.05366911  | 0 | 0            |
| 0 | -0.03778266  | 0 | 0            | 0 | 0            | 0 | -0.051445124 |
| 0 | 0            | 0 | -0.035828522 | 0 | -0.016865832 | 0 | 0            |
| 0 | 0.079634145  | 0 | 0            | 0 | -0.064814302 | 0 | 0            |
| 0 | 0.37568965   | 0 | 0            | 0 | -0.063760817 | 0 | -0.057419612 |
| 0 | -0.008386795 | 0 | -0.03584514  | 0 | -0.016566783 | 0 | 0            |
| 0 | 0            | 0 | 0            | 0 | -0.063641719 | 0 | -0.023604064 |
| 0 | 0            | 0 | -0.054628682 | 0 | 0            | 0 | 0            |
| 0 | 0.37572227   | 0 | -0.06307962  | 0 | 0            | 0 | -0.057910584 |
| 0 | 0.067240471  | 0 | -0.056889327 | 0 | 0            | 0 | -0.023405781 |
| 0 | 0            | 0 | -0.066161384 | 0 | 0            | 0 | 0            |
| 0 | 0            | 0 | 0            | 0 | -0.054749948 | 0 | 0            |
| 0 | 0.37082209   | 0 | 0            | 0 | 0            | 0 | 0            |
| 0 | 0.056174785  | 0 | -0.045842576 | 0 | 0            | 0 | 0            |
| 0 | 0            | 0 | -0.059072888 | 0 | 0            | 0 | -0.031230988 |
| 0 | 0            | 0 | -0.049921676 | 0 | -0.010060182 | 0 | -0.032116053 |
| 0 | 0.067058764  | 0 | 0            | 0 | -0.056213843 | 0 | -0.022632826 |
| 0 | 0.059626529  | 0 | -0.038948074 | 0 | -0.007851165 | 0 | 0            |
| 0 | 0.35440532   | 0 | -0.052696207 | 0 | 0            | 0 | 0            |
| 0 | 0            | 0 | 0            | 0 | -0.065435813 | 0 | 0            |
| 0 | 0            | 0 | 0            | 0 | 0            | 0 | -0.02558173  |
| 0 | 0.056129048  | 0 | 0            | 0 | -0.045274969 | 0 | 0            |
| 0 | 0            | 0 | -0.057948219 | 0 | 0            | 0 | -0.023311112 |
| 0 | 0.35493704   | 0 | 0            | 0 | -0.052422532 | 0 | 0            |
| 0 | 0            | 0 | 0            | 0 | -0.058424659 | 0 | -0.03037617  |
| 0 | 0            | 0 | -0.046729628 | 0 | 0            | 0 | 0            |
| 0 | 0            | 0 | -0.02018307  | 0 | -0.031560333 | 0 | 0            |
| 0 | 0            | 0 | -0.038836177 | 0 | -0.008960822 | 0 | 0            |
| 0 | 0            | 0 | 0            | 0 | -0.05731523  | 0 | -0.022532028 |
| 0 | 0.35187574   | 0 | -0.058393287 | 0 | 0            | 0 | -0.004593663 |
| 0 | 0            | 0 | -0.051495603 | 0 | -0.015974917 | 0 | 0            |
| 0 | 0            | 0 | -0.067950953 | 0 | 0            | 0 | 0            |
| 0 | 0            | 0 | 0            | 0 | -0.046200812 | 0 | 0            |
| 0 | 0            | 0 | 0            | 0 | 0            | 0 | 0            |
| 0 | 0.3535422    | 0 | -0.057726234 | 0 | 0            | 0 | 0            |
| 0 | 0.35194507   | 0 | -0.050471435 | 0 | -0.006222959 | 0 | 0            |

|   |              |   |              |   |              |   |              |
|---|--------------|---|--------------|---|--------------|---|--------------|
| 0 | 0.35177627   | 0 | -0.056686685 | 0 | 0            | 0 | 0            |
| 0 | 0            | 0 | 0            | 0 | -0.067332653 | 0 | 0            |
| 0 | 0.35235278   | 0 | 0            | 0 | -0.057422315 | 0 | -0.003284187 |
| 0 | 0.35290773   | 0 | 0            | 0 | -0.056494622 | 0 | 0            |
| 0 | 0.35238182   | 0 | 0            | 0 | -0.056108427 | 0 | 0            |
| 0 | 0.065928094  | 0 | -0.042091841 | 0 | -0.010556995 | 0 | 0            |
| 0 | 0            | 0 | -0.023109424 | 0 | -0.042068254 | 0 | -0.057202662 |
| 0 | 0            | 0 | 0            | 0 | -0.064717255 | 0 | -0.056612589 |
| 0 | 0            | 0 | -0.063955919 | 0 | 0            | 0 | -0.057181684 |
| 0 | 0.50908885   | 0 | 0            | 0 | 0            | 0 | 0            |
| 0 | -0.042441308 | 0 | -0.023130078 | 0 | -0.041966925 | 0 | -0.05634271  |
| 0 | 0.061308362  | 0 | -0.056821465 | 0 | 0            | 0 | -0.006547123 |
| 0 | 0.062096184  | 0 | -0.057667171 | 0 | 0            | 0 | -0.00603121  |
| 0 | -0.042376098 | 0 | 0            | 0 | -0.064637289 | 0 | -0.055746575 |
| 0 | 0            | 0 | -0.042248545 | 0 | -0.011513679 | 0 | 0            |
| 0 | 0.061889238  | 0 | -0.054433121 | 0 | -0.003565168 | 0 | -0.004440834 |
| 0 | 0.06281541   | 0 | -0.052226011 | 0 | -0.004907317 | 0 | 0            |
| 0 | 0.063082631  | 0 | -0.056960263 | 0 | 0            | 0 | 0            |
| 0 | 0.37044311   | 0 | 0            | 0 | 0            | 0 | -0.024977752 |
| 0 | 0.062496869  | 0 | -0.051313242 | 0 | -0.005134986 | 0 | 0            |
| 0 | -0.042297661 | 0 | -0.063875622 | 0 | 0            | 0 | -0.056320543 |
| 0 | 0.060947579  | 0 | 0            | 0 | -0.055486203 | 0 | -0.005994216 |
| 0 | 0.061990938  | 0 | 0            | 0 | -0.056647411 | 0 | -0.004824426 |
| 0 | 0            | 0 | -0.073994692 | 0 | 0            | 0 | -0.022499097 |
| 0 | 0            | 0 | -0.057663221 | 0 | 0            | 0 | -0.007067333 |
| 0 | 0            | 0 | -0.058712946 | 0 | 0            | 0 | -0.006119754 |
| 0 | 0.062466412  | 0 | 0            | 0 | -0.055657301 | 0 | 0            |
| 0 | 0            | 0 | -0.054490045 | 0 | -0.004592951 | 0 | -0.004564806 |
| 0 | 0            | 0 | -0.051992156 | 0 | -0.006047658 | 0 | 0            |
| 0 | 0            | 0 | -0.05133799  | 0 | -0.00618113  | 0 | 0            |
| 0 | 0            | 0 | -0.057737772 | 0 | 0            | 0 | 0            |
| 0 | 0            | 0 | 0            | 0 | -0.074171333 | 0 | -0.021690686 |
| 0 | 0            | 0 | -0.041972977 | 0 | -0.01391589  | 0 | 0            |
| 0 | 0.38844514   | 0 | 0            | 0 | 0            | 0 | 0            |
| 0 | 0            | 0 | 0            | 0 | -0.056377676 | 0 | -0.006503808 |
| 0 | 0            | 0 | 0            | 0 | -0.057739834 | 0 | -0.004900438 |
| 0 | 0.078818704  | 0 | 0            | 0 | 0            | 0 | -0.020223604 |
| 0 | 0            | 0 | 0            | 0 | -0.056491033 | 0 | 0            |
| 0 | 0            | 0 | -0.078276184 | 0 | 0            | 0 | 0            |
| 0 | 0.07631907   | 0 | 0            | 0 | 0            | 0 | -0.024441486 |
| 0 | 0            | 0 | 0            | 0 | -0.078567318 | 0 | 0            |
| 0 | 0.36880049   | 0 | 0            | 0 | 0            | 0 | -0.015942271 |
| 0 | 0            | 0 | -0.039553109 | 0 | -0.030906016 | 0 | 0            |
| 0 | 0            | 0 | -0.077320612 | 0 | 0            | 0 | -0.019515441 |
| 0 | 0.3673531    | 0 | 0            | 0 | 0            | 0 | 0            |
| 0 | 0            | 0 | 0            | 0 | 0            | 0 | -0.020827345 |
| 0 | 0.36623451   | 0 | 0            | 0 | 0            | 0 | 0            |



|   |              |   |              |   |              |   |              |   |
|---|--------------|---|--------------|---|--------------|---|--------------|---|
| 0 | 0            | 0 | 0            | 0 | 0            | 0 | -0.024657618 | 0 |
| 0 | 0            | 0 | -0.049642795 | 0 | -0.023011667 | 0 | -0.022470581 | 0 |
| 0 | 0            | 0 | 0            | 0 | 0            | 0 | -0.024399189 | 0 |
| 0 | 0            | 0 | 0            | 0 | 0            | 0 | -0.022584587 | 0 |
| 0 | -0.00409708  | 0 | 0            | 0 | 0            | 0 | -0.024200231 | 0 |
| 0 | 0            | 0 | 0            | 0 | -0.076900898 | 0 | -0.018755515 | 0 |
| 0 | 0.086079927  | 0 | 0            | 0 | 0            | 0 | 0            | 0 |
| 0 | 0.36866467   | 0 | 0            | 0 | 0            | 0 | 0            | 0 |
| 0 | 0            | 0 | -0.049206434 | 0 | -0.028437864 | 0 | 0            | 0 |
| 0 | 0            | 0 | 0            | 0 | 0            | 0 | 0            | 0 |
| 0 | 0            | 0 | -0.021513105 | 0 | -0.041571271 | 0 | -0.045403552 | 0 |
| 0 | 0            | 0 | 0            | 0 | 0            | 0 | -0.019146395 | 0 |
| 0 | 0.36793909   | 0 | 0            | 0 | 0            | 0 | 0            | 0 |
| 0 | -0.00685899  | 0 | 0            | 0 | 0            | 0 | -0.018554594 | 0 |
| 0 | 0.002854973  | 0 | 0            | 0 | 0            | 0 | 0            | 0 |
| 0 | 0            | 0 | 0            | 0 | 0            | 0 | 0            | 0 |
| 0 | 0            | 0 | -0.051869073 | 0 | -0.017340641 | 0 | -0.011480891 | 0 |
| 0 | 0            | 0 | -0.068220002 | 0 | 0            | 0 | -0.011317638 | 0 |
| 0 | 0            | 0 | -0.054464229 | 0 | -0.017686255 | 0 | -0.007446552 | 0 |
| 0 | 0            | 0 | -0.049284865 | 0 | -0.019985927 | 0 | 0            | 0 |
| 0 | 0.10522466   | 0 | 0            | 0 | 0            | 0 | -0.013625989 | 0 |
| 0 | 0            | 0 | 0            | 0 | -0.067311597 | 0 | -0.010486359 | 0 |
| 0 | 0.10686932   | 0 | 0            | 0 | 0            | 0 | 0            | 0 |
| 0 | 0.37141369   | 0 | 0            | 0 | 0            | 0 | -0.013870993 | 0 |
| 0 | 0            | 0 | 0            | 0 | 0            | 0 | -0.013336669 | 0 |
| 0 | 0.37674403   | 0 | 0            | 0 | 0            | 0 | 0            | 0 |
| 0 | 0            | 0 | 0            | 0 | 0            | 0 | 0            | 0 |
| 0 | 0.36594153   | 0 | 0            | 0 | -0.065549313 | 0 | 0            | 0 |
| 0 | 0.39282964   | 0 | -0.081135802 | 0 | 0            | 0 | 0            | 0 |
| 0 | 0.36526409   | 0 | -0.016604449 | 0 | -0.04899446  | 0 | 0            | 0 |
| 0 | 0.39152706   | 0 | 0            | 0 | -0.080836377 | 0 | 0            | 0 |
| 0 | 0.10030311   | 0 | 0            | 0 | 0            | 0 | -0.013532459 | 0 |
| 0 | 0.36602749   | 0 | -0.064325996 | 0 | 0            | 0 | 0            | 0 |
| 0 | 0.3573999    | 0 | -0.06490496  | 0 | 0            | 0 | 0            | 0 |
| 0 | 0.35787192   | 0 | 0            | 0 | -0.065132537 | 0 | 0            | 0 |
| 0 | 0.35087172   | 0 | 0            | 0 | 0            | 0 | -0.006825238 | 0 |
| 0 | 0.35049695   | 0 | 0            | 0 | 0            | 0 | 0            | 0 |
| 0 | 0.36391436   | 0 | -0.074844678 | 0 | 0            | 0 | -0.027498108 | 0 |
| 0 | 0.364025     | 0 | 0            | 0 | -0.074919734 | 0 | -0.026181789 | 0 |
| 0 | 0            | 0 | -0.069170554 | 0 | 0            | 0 | -0.019108562 | 0 |
| 0 | 0            | 0 | 0            | 0 | 0            | 0 | -0.013780892 | 0 |
| 0 | 0            | 0 | -0.081016598 | 0 | 0            | 0 | -0.01797563  | 0 |
| 0 | 0            | 0 | 0            | 0 | 0            | 0 | -0.025658796 | 0 |
| 0 | 0            | 0 | -0.073605689 | 0 | 0            | 0 | 0            | 0 |
| 0 | 0            | 0 | 0            | 0 | -0.069075649 | 0 | -0.018279102 | 0 |
| 0 | -0.027776485 | 0 | -0.068910255 | 0 | 0            | 0 | -0.018486393 | 0 |
| 0 | 0.36675823   | 0 | 0            | 0 | 0            | 0 | 0.003146018  | 0 |

|   |              |   |              |   |              |   |              |   |
|---|--------------|---|--------------|---|--------------|---|--------------|---|
| 0 | 0            | 0 | 0            | 0 | -0.080554941 | 0 | -0.017040924 | 0 |
| 0 | 0.085831452  | 0 | 0            | 0 | 0            | 0 | -0.006301195 | 0 |
| 0 | -0.027309548 | 0 | -0.080841187 | 0 | 0            | 0 | -0.017347973 | 0 |
| 0 | -0.021939443 | 0 | -0.073380111 | 0 | 0            | 0 | 0            | 0 |
| 0 | 0            | 0 | 0            | 0 | -0.073488484 | 0 | 0            | 0 |
| 0 | -0.027612431 | 0 | 0            | 0 | -0.068814054 | 0 | -0.017662212 | 0 |
| 0 | 0            | 0 | -0.015622506 | 0 | -0.051083989 | 0 | 0            | 0 |
| 0 | -0.027163535 | 0 | 0            | 0 | -0.080384526 | 0 | -0.016416773 | 0 |
| 0 | -0.022055236 | 0 | 0            | 0 | -0.073254382 | 0 | 0            | 0 |
| 0 | 0            | 0 | -0.047355317 | 0 | -0.03514721  | 0 | 0            | 0 |
| 0 | -0.023666737 | 0 | -0.0156864   | 0 | -0.050894291 | 0 | 0            | 0 |
| 0 | 0            | 0 | -0.04267348  | 0 | -0.023846577 | 0 | 0            | 0 |
| 0 | -0.022051198 | 0 | -0.047308311 | 0 | -0.035000971 | 0 | 0            | 0 |
| 0 | -0.022138111 | 0 | -0.04268677  | 0 | -0.02368098  | 0 | 0            | 0 |
| 0 | 0            | 0 | 0            | 0 | 0            | 0 | -0.006748061 | 0 |
| 0 | 0            | 0 | -0.072220105 | 0 | 0            | 0 | -0.00928497  | 0 |
| 0 | 0            | 0 | -0.043161438 | 0 | -0.033478802 | 0 | -0.026870756 | 0 |
| 0 | 0.39819399   | 0 | 0            | 0 | 0            | 0 | -0.05887253  | 0 |
| 0 | 0            | 0 | -0.048255348 | 0 | -0.024857118 | 0 | 0            | 0 |
| 0 | 0            | 0 | 0            | 0 | -0.071896749 | 0 | -0.008608888 | 0 |
| 0 | 0            | 0 | -0.04602945  | 0 | -0.020924901 | 0 | -0.012795784 | 0 |
| 0 | -0.03035312  | 0 | -0.042960529 | 0 | -0.033486119 | 0 | -0.026326724 | 0 |
| 0 | 0            | 0 | -0.049200558 | 0 | -0.03106881  | 0 | -0.01111783  | 0 |
| 0 | 0.36104579   | 0 | -0.032116002 | 0 | -0.041259729 | 0 | 0            | 0 |
| 0 | 0.35686612   | 0 | 0            | 0 | -0.085793956 | 0 | 0            | 0 |
| 0 | 0.35660397   | 0 | -0.0848492   | 0 | 0            | 0 | 0            | 0 |
| 0 | 0            | 0 | -0.039837538 | 0 | -0.047245087 | 0 | 0            | 0 |
| 0 | -0.014071724 | 0 | -0.039741495 | 0 | -0.047186697 | 0 | 0            | 0 |
| 0 | 0            | 0 | 0            | 0 | -0.087834822 | 0 | -0.004466892 | 0 |
| 0 | 0.34279918   | 0 | -0.079130856 | 0 | 0            | 0 | 0            | 0 |
| 0 | 0            | 0 | 0            | 0 | -0.087200278 | 0 | 0            | 0 |
| 0 | 0            | 0 | -0.087069926 | 0 | 0            | 0 | -0.004965407 | 0 |
| 0 | 0.34191987   | 0 | 0            | 0 | -0.079016256 | 0 | 0            | 0 |
| 0 | 0            | 0 | -0.086259907 | 0 | 0            | 0 | 0            | 0 |
| 0 | -0.015165202 | 0 | 0            | 0 | -0.087515368 | 0 | -0.003946901 | 0 |
| 0 | -0.013948159 | 0 | 0            | 0 | -0.087003729 | 0 | 0            | 0 |
| 0 | -0.01529145  | 0 | -0.086749646 | 0 | 0            | 0 | -0.004442437 | 0 |
| 0 | -0.013920027 | 0 | -0.086066934 | 0 | 0            | 0 | 0            | 0 |
| 0 | 0            | 0 | -0.040018329 | 0 | -0.047327334 | 0 | 0            | 0 |
| 0 | 0            | 0 | -0.039808611 | 0 | -0.046778065 | 0 | -0.001860001 | 0 |
| 0 | 0.35515892   | 0 | -0.05148761  | 0 | -0.036107861 | 0 | 0            | 0 |
| 0 | 0.35466875   | 0 | -0.084239596 | 0 | 0            | 0 | 0.005832439  | 0 |
| 0 | 0            | 0 | 0            | 0 | -0.086261508 | 0 | -0.001004468 | 0 |
| 0 | 0.3548737    | 0 | 0            | 0 | -0.084334019 | 0 | 0.007052762  | 0 |
| 0 | 0            | 0 | -0.085384488 | 0 | 0            | 0 | -0.00151963  | 0 |
| 0 | 0.35794635   | 0 | -0.044414897 | 0 | -0.040888609 | 0 | 0            | 0 |
| 0 | 0.35735783   | 0 | -0.047257997 | 0 | -0.039057379 | 0 | -0.001155211 | 0 |

|   |              |   |              |   |              |   |              |   |
|---|--------------|---|--------------|---|--------------|---|--------------|---|
| 0 | 0.35691844   | 0 | -0.045768532 | 0 | -0.039616609 | 0 | 0            | 0 |
| 0 | 0.35886819   | 0 | -0.08550576  | 0 | 0            | 0 | -0.004903493 | 0 |
| 0 | 0.36134226   | 0 | -0.085557655 | 0 | 0            | 0 | 0            | 0 |
| 0 | 0.3556086    | 0 | -0.08407438  | 0 | 0            | 0 | -0.003430763 | 0 |
| 0 | 0.35920598   | 0 | 0            | 0 | -0.085909031 | 0 | -0.004316078 | 0 |
| 0 | 0.36149089   | 0 | 0            | 0 | -0.08603947  | 0 | 0            | 0 |
| 0 | 0.35496351   | 0 | 0            | 0 | -0.083955397 | 0 | -0.002622599 | 0 |
| 0 | 0            | 0 | -0.043889488 | 0 | -0.036288213 | 0 | 0            | 0 |
| 0 | -0.018140343 | 0 | -0.043828652 | 0 | -0.036075059 | 0 | 0            | 0 |
| 0 | 0            | 0 | -0.078920529 | 0 | 0            | 0 | -0.000944141 | 0 |
| 0 | 0            | 0 | 0            | 0 | -0.078792024 | 0 | -0.000194699 | 0 |
| 0 | -0.018014788 | 0 | -0.078627149 | 0 | 0            | 0 | -0.000378301 | 0 |
| 0 | -0.017970011 | 0 | 0            | 0 | -0.07849967  | 0 | 0.000367397  | 0 |
| 0 | 0            | 0 | -0.048804408 | 0 | -0.037216032 | 0 | 0.006213825  | 0 |
| 0 | -0.017069432 | 0 | -0.048616006 | 0 | -0.037074354 | 0 | 0.006774928  | 0 |
| 0 | 0            | 0 | -0.042904367 | 0 | -0.035182762 | 0 | 0.003799331  | 0 |
| 0 | 0            | 0 | -0.046215782 | 0 | -0.041250205 | 0 | -0.00475578  | 0 |
| 0 | 0            | 0 | -0.046150564 | 0 | -0.039313691 | 0 | -0.003988376 | 0 |
| 0 | 0            | 0 | -0.045275852 | 0 | -0.041411652 | 0 | 0            | 0 |
| 0 | -0.022928709 | 0 | -0.046072169 | 0 | -0.04105394  | 0 | -0.004210712 | 0 |
| 0 | 0            | 0 | -0.085389266 | 0 | 0            | 0 | -0.00509893  | 0 |
| 0 | -0.022700951 | 0 | -0.045966971 | 0 | -0.039316116 | 0 | -0.003495331 | 0 |
| 0 | -0.021625199 | 0 | -0.045244806 | 0 | -0.041201488 | 0 | 0            | 0 |
| 0 | 0            | 0 | 0            | 0 | -0.085768973 | 0 | -0.004521205 | 0 |
| 0 | -0.022813597 | 0 | -0.085099939 | 0 | 0            | 0 | -0.004526692 | 0 |
| 0 | -0.022836736 | 0 | 0            | 0 | -0.085473441 | 0 | -0.003952292 | 0 |
| 0 | 0            | 0 | 0            | 0 | 0            | 0 | -0.016521167 | 0 |
| 0 | 0            | 0 | -0.045002908 | 0 | -0.039887436 | 0 | 0.000377024  | 0 |
| 0 | 0.36457501   | 0 | 0            | 0 | 0            | 0 | 0            | 0 |
| 0 | 0.37819568   | 0 | 0            | 0 | 0            | 0 | -0.007805563 | 0 |
| 0 | 0            | 0 | 0            | 0 | 0            | 0 | -0.012665681 | 0 |
| 0 | -0.020480337 | 0 | 0            | 0 | 0            | 0 | -0.012062935 | 0 |
| 0 | 0.49228042   | 0 | 0            | 0 | 0            | 0 | -0.054317739 | 0 |
| 0 | 0            | 0 | -0.02631589  | 0 | 0            | 0 | -0.050091427 | 0 |
| 0 | 0            | 0 | -0.027732288 | 0 | 0            | 0 | -0.053178409 | 0 |
| 0 | 0            | 0 | 0            | 0 | -0.025079762 | 0 | -0.049901706 | 0 |
| 0 | 0.39357651   | 0 | 0            | 0 | 0            | 0 | -0.018664038 | 0 |
| 0 | 0            | 0 | 0            | 0 | -0.027041797 | 0 | -0.052999475 | 0 |
| 0 | 0            | 0 | 0            | 0 | 0            | 0 | -0.051150188 | 0 |
| 0 | -0.048381791 | 0 | -0.027630212 | 0 | 0            | 0 | -0.052119333 | 0 |
| 0 | 0            | 0 | 0            | 0 | 0            | 0 | -0.053938562 | 0 |
| 0 | -0.048348643 | 0 | 0            | 0 | -0.026938608 | 0 | -0.051943899 | 0 |
| 0 | 0            | 0 | 0            | 0 | 0            | 0 | -0.05369856  | 0 |
| 0 | -0.015955372 | 0 | 0            | 0 | 0            | 0 | -0.052886476 | 0 |
| 0 | 0            | 0 | 0            | 0 | 0            | 0 | -0.051498299 | 0 |
| 0 | 0            | 0 | 0            | 0 | 0            | 0 | -0.054676166 | 0 |
| 0 | -0.043922286 | 0 | 0            | 0 | 0            | 0 | -0.052621178 | 0 |

|   |              |   |              |   |              |              |              |
|---|--------------|---|--------------|---|--------------|--------------|--------------|
| 0 | -0.047604994 | 0 | 0            | 0 | 0            | -0.0536123   | 0            |
| 0 | 0            | 0 | -0.046739201 | 0 | 0            | -0.051753023 | 0            |
| 0 | 0            | 0 | 0            | 0 | -0.046503559 | 0            | -0.051288415 |
| 0 | 0            | 0 | -0.028645627 | 0 | 0            | -0.04064428  | 0            |
| 0 | 0            | 0 | 0            | 0 | 0            | -0.04503174  | 0            |
| 0 | 0            | 0 | 0            | 0 | -0.028365256 | 0            | -0.04045444  |
| 0 | 0.48832324   | 0 | -0.030052797 | 0 | 0            | 0            | 0            |
| 0 | 0.48838233   | 0 | 0            | 0 | -0.029910655 | 0            | 0            |
| 0 | 0            | 0 | 0            | 0 | 0            | -0.057272249 | 0            |
| 0 | 0.33488386   | 0 | 0            | 0 | 0            | 0            | 0            |
| 0 | 0.33400675   | 0 | 0            | 0 | 0            | 0.002703583  | 0            |
| 0 | 0.4877992    | 0 | 0            | 0 | 0            | 0            | 0            |
| 0 | 0.48779099   | 0 | 0            | 0 | 0            | 0            | 0            |
| 0 | 0            | 0 | -0.025978644 | 0 | 0            | -0.04043484  | 0            |
| 0 | 0            | 0 | -0.023824927 | 0 | -0.002538446 | 0            | -0.040092072 |
| 0 | 0            | 0 | -0.044296479 | 0 | 0            | 0            | -0.04553668  |
| 0 | 0            | 0 | 0            | 0 | -0.025243803 | 0            | -0.040259806 |
| 0 | 0            | 0 | 0            | 0 | -0.044281914 | 0            | -0.045149899 |
| 0 | 0.48979284   | 0 | 0            | 0 | 0            | 0            | 0            |
| 0 | 0            | 0 | -0.031082734 | 0 | 0            | 0            | 0            |
| 0 | 0            | 0 | 0            | 0 | -0.030874722 | 0            | 0            |
| 0 | 0            | 0 | 0            | 0 | 0            | 0.001729356  | 0            |
| 0 | -0.007463819 | 0 | 0            | 0 | 0            | 0.002247256  | 0            |
| 0 | 0            | 0 | -0.031848831 | 0 | 0            | 0            | 0            |
| 0 | 0            | 0 | 0            | 0 | -0.032013397 | 0            | 0            |
| 0 | 0            | 0 | -0.029541744 | 0 | 0            | 0            | 0            |
| 0 | 0            | 0 | -0.029358167 | 0 | 0            | 0            | 0            |
| 0 | 0            | 0 | -0.024073442 | 0 | -0.005429536 | 0            | 0            |
| 0 | 0.000143488  | 0 | -0.029227612 | 0 | 0            | 0            | 0            |
| 0 | 0            | 0 | 0            | 0 | -0.029087496 | 0            | 0            |
| 0 | 0            | 0 | 0            | 0 | -0.028842411 | 0            | 0            |
| 0 | -0.000474287 | 0 | 0            | 0 | -0.028682035 | 0            | 0            |
| 0 | 0.33662753   | 0 | 0            | 0 | 0            | 0.002240073  | 0            |
| 0 | 0.037601096  | 0 | 0            | 0 | 0            | -0.050519788 | 0            |
| 0 | -0.026538021 | 0 | -0.031761436 | 0 | 0            | 0            | 0            |
| 0 | -0.026530491 | 0 | 0            | 0 | -0.031926462 | 0            | 0            |
| 0 | 0            | 0 | 0            | 0 | 0            | 0            | 0            |
| 0 | 0            | 0 | -0.019829171 | 0 | -0.01093947  | 0            | 0            |
| 0 | 0            | 0 | -0.030251269 | 0 | 0            | 0            | 0            |
| 0 | 0            | 0 | 0            | 0 | 0            | -0.051363852 | 0            |
| 0 | 0            | 0 | -0.031035419 | 0 | 0            | 0            | 0            |
| 0 | 0            | 0 | 0            | 0 | -0.030142417 | 0            | 0            |
| 0 | 0            | 0 | 0            | 0 | -0.031036539 | 0            | 0            |
| 0 | 0            | 0 | 0            | 0 | -0.056953732 | 0            | -0.049178036 |
| 0 | 0            | 0 | -0.056443959 | 0 | 0            | -0.049607164 | 0            |
| 0 | 0.007320813  | 0 | 0            | 0 | 0            | 0            | 0            |
| 0 | 0            | 0 | 0            | 0 | 0            | 0            | 0            |

|   |              |   |              |   |              |   |              |   |
|---|--------------|---|--------------|---|--------------|---|--------------|---|
| 0 | -0.030903947 | 0 | -0.019861111 | 0 | -0.010746545 | 0 | 0            | 0 |
| 0 | -0.030866088 | 0 | -0.03009628  | 0 | 0            | 0 | 0            | 0 |
| 0 | -0.030930123 | 0 | 0            | 0 | -0.02997497  | 0 | 0            | 0 |
| 0 | -0.033142843 | 0 | 0            | 0 | -0.056625626 | 0 | -0.04816335  | 0 |
| 0 | 0            | 0 | 0            | 0 | 0            | 0 | 0            | 0 |
| 0 | -0.033066869 | 0 | -0.056117173 | 0 | 0            | 0 | -0.048590934 | 0 |
| 0 | 0            | 0 | -0.046123844 | 0 | 0            | 0 | 0            | 0 |
| 0 | 0            | 0 | 0            | 0 | -0.04624374  | 0 | 0            | 0 |
| 0 | 0.034593404  | 0 | -0.051243294 | 0 | 0            | 0 | -0.049916523 | 0 |
| 0 | 0            | 0 | -0.017206283 | 0 | -0.0146083   | 0 | 0            | 0 |
| 0 | -0.02236576  | 0 | 0            | 0 | 0            | 0 | 0            | 0 |
| 0 | 0            | 0 | 0            | 0 | 0            | 0 | 0            | 0 |
| 0 | 0.002744251  | 0 | 0            | 0 | 0            | 0 | 0            | 0 |
| 0 | 0.033880499  | 0 | 0            | 0 | -0.050645941 | 0 | -0.049563084 | 0 |
| 0 | 0            | 0 | 0            | 0 | 0            | 0 | -0.055528107 | 0 |
| 0 | 0            | 0 | -0.052533386 | 0 | 0            | 0 | -0.050755386 | 0 |
| 0 | 0.036407862  | 0 | -0.044925505 | 0 | 0            | 0 | 0            | 0 |
| 0 | 0.035229646  | 0 | 0            | 0 | -0.045054636 | 0 | 0            | 0 |
| 0 | -0.023811423 | 0 | 0            | 0 | 0            | 0 | -0.054544177 | 0 |
| 0 | 0            | 0 | 0            | 0 | -0.052016461 | 0 | -0.050391632 | 0 |
| 0 | 0.38223216   | 0 | 0            | 0 | 0            | 0 | 0.020057101  | 0 |
| 0 | 0            | 0 | -0.046079742 | 0 | 0            | 0 | 0            | 0 |
| 0 | 0            | 0 | 0            | 0 | -0.046301008 | 0 | 0            | 0 |
| 0 | 0            | 0 | -0.038559164 | 0 | -0.019731297 | 0 | -0.053834249 | 0 |
| 0 | 0            | 0 | -0.057633297 | 0 | 0            | 0 | -0.053884017 | 0 |
| 0 | 0            | 0 | 0            | 0 | -0.057287852 | 0 | -0.053292435 | 0 |
| 0 | 0            | 0 | -0.020102507 | 0 | -0.009068727 | 0 | 0            | 0 |
| 0 | 0            | 0 | -0.020834996 | 0 | -0.033725513 | 0 | -0.040214429 | 0 |
| 0 | 0            | 0 | -0.022618157 | 0 | -0.0295186   | 0 | 0            | 0 |
| 0 | 0.48624901   | 0 | 0            | 0 | -0.058379111 | 0 | 0            | 0 |
| 0 | 0.48632974   | 0 | -0.057501777 | 0 | 0            | 0 | 0            | 0 |
| 0 | 0            | 0 | 0            | 0 | -0.050513214 | 0 | 0            | 0 |
| 0 | 0            | 0 | -0.049970275 | 0 | 0            | 0 | 0            | 0 |
| 0 | -0.012756182 | 0 | 0            | 0 | -0.050081271 | 0 | 0            | 0 |
| 0 | 0.48402809   | 0 | 0            | 0 | 0            | 0 | 0            | 0 |
| 0 | -0.01248435  | 0 | -0.049554185 | 0 | 0            | 0 | 0            | 0 |
| 0 | 0            | 0 | -0.02042563  | 0 | -0.028792518 | 0 | 0            | 0 |
| 0 | 0.045927977  | 0 | 0            | 0 | 0            | 0 | 0            | 0 |
| 0 | 0.49434312   | 0 | 0            | 0 | 0            | 0 | -0.052396716 | 0 |
| 0 | 0            | 0 | 0            | 0 | 0            | 0 | 0            | 0 |
| 0 | 0.49326399   | 0 | 0            | 0 | 0            | 0 | -0.051158183 | 0 |
| 0 | 0.48830177   | 0 | -0.053932109 | 0 | 0            | 0 | 0            | 0 |
| 0 | 0.48849419   | 0 | 0            | 0 | -0.053849093 | 0 | 0            | 0 |
| 0 | 0.48517891   | 0 | 0            | 0 | 0            | 0 | 0            | 0 |
| 0 | 0.37671553   | 0 | 0            | 0 | 0            | 0 | -0.060041453 | 0 |
| 0 | 0.37545014   | 0 | 0            | 0 | 0            | 0 | -0.060577477 | 0 |
| 0 | 0            | 0 | -0.017454621 | 0 | -0.041736954 | 0 | 0            | 0 |



|   |              |   |              |   |              |              |              |
|---|--------------|---|--------------|---|--------------|--------------|--------------|
| 0 | 0.023338138  | 0 | -0.030146615 | 0 | 0            | -0.056253232 | 0            |
| 0 | 0.022729452  | 0 | 0            | 0 | -0.029982325 | 0            | -0.056021855 |
| 0 | 0            | 0 | -0.031043424 | 0 | 0            | 0            | -0.056879529 |
| 0 | 0            | 0 | 0            | 0 | -0.030943337 | 0            | -0.056642062 |
| 0 | 0.37631023   | 0 | 0            | 0 | 0            | 0            | -0.057663019 |
| 0 | 0.49176645   | 0 | 0            | 0 | 0            | 0            | 0            |
| 0 | 0            | 0 | -0.011539537 | 0 | -0.003567677 | 0            | -0.047832361 |
| 0 | 0            | 0 | -0.019165493 | 0 | -0.01520476  | 0            | -0.058772701 |
| 0 | 0            | 0 | 0            | 0 | -0.034201366 | 0            | -0.059991471 |
| 0 | 0            | 0 | -0.033999306 | 0 | 0            | 0            | -0.060295723 |
| 0 | -0.027544319 | 0 | 0            | 0 | -0.033952817 | 0            | -0.059205459 |
| 0 | -0.02748009  | 0 | -0.033755896 | 0 | 0            | 0            | -0.059507254 |
| 0 | 0            | 0 | -0.032614315 | 0 | -0.045019616 | 0            | -0.049784701 |
| 0 | 0            | 0 | 0            | 0 | -0.076727178 | 0            | -0.049374437 |
| 0 | 0.37784888   | 0 | 0            | 0 | 0            | 0            | -0.061643511 |
| 0 | 0            | 0 | -0.076197928 | 0 | 0            | 0            | -0.050028335 |
| 0 | -0.043432324 | 0 | -0.032512266 | 0 | -0.04493117  | 0            | -0.048726288 |
| 0 | -0.043362089 | 0 | 0            | 0 | -0.07653885  | 0            | -0.048313866 |
| 0 | -0.043294473 | 0 | -0.076011082 | 0 | 0            | 0            | -0.048966013 |
| 0 | 0            | 0 | -0.0157239   | 0 | -0.0161011   | 0            | -0.052771438 |
| 0 | 0            | 0 | -0.014973074 | 0 | 0.003361949  | 0            | -0.047584822 |
| 0 | 0.37131304   | 0 | 0            | 0 | -0.043124028 | 0            | -0.056369628 |
| 0 | 0.37139844   | 0 | -0.042411233 | 0 | 0            | 0            | -0.056702714 |
| 0 | 0.3646703    | 0 | 0            | 0 | 0            | 0            | 0            |
| 0 | 0.36236275   | 0 | 0            | 0 | -0.017024898 | 0            | 0            |
| 0 | 0.36234709   | 0 | -0.016672977 | 0 | 0            | 0            | 0            |
| 0 | 0.36511547   | 0 | 0            | 0 | 0            | 0            | 0            |
| 0 | 0.49847619   | 0 | -0.027699985 | 0 | -0.051153425 | 0            | 0            |
| 0 | 0.49852058   | 0 | 0            | 0 | -0.078252577 | 0            | 0            |
| 0 | 0.49866002   | 0 | -0.077346837 | 0 | 0            | 0            | 0            |
| 0 | 0.3618105    | 0 | -0.013749761 | 0 | 0            | 0            | 0            |
| 0 | 0.36200154   | 0 | 0            | 0 | -0.013427594 | 0            | 0            |
| 0 | 0            | 0 | -0.016717525 | 0 | 0            | 0            | 0            |
| 0 | 0            | 0 | 0            | 0 | -0.016656089 | 0            | 0            |
| 0 | 0.36554141   | 0 | 0            | 0 | 0            | 0            | 0            |
| 0 | 0.008652501  | 0 | -0.016541304 | 0 | 0            | 0            | 0            |
| 0 | 0.008316412  | 0 | 0            | 0 | -0.016501136 | 0            | 0            |
| 0 | 0            | 0 | -0.010188296 | 0 | -0.006904724 | 0            | 0            |
| 0 | 0            | 0 | -0.016709779 | 0 | 0            | 0            | 0            |
| 0 | 0            | 0 | 0            | 0 | -0.01672801  | 0            | 0            |
| 0 | 0.01112263   | 0 | 0            | 0 | 0            | 0            | 0            |
| 0 | 0            | 0 | 0            | 0 | 0            | 0            | 0            |
| 0 | 0.36368713   | 0 | -0.014644789 | 0 | 0            | 0            | 0            |
| 0 | 0.36377717   | 0 | 0            | 0 | -0.014711121 | 0            | 0            |
| 0 | 0.36348972   | 0 | -0.00878729  | 0 | -0.005915283 | 0            | 0            |
| 0 | 0            | 0 | -0.012456101 | 0 | -0.031754544 | 0            | -0.056084209 |
| 0 | 0            | 0 | 0            | 0 | -0.017476797 | 0            | 0            |

|   |              |   |              |   |              |   |              |
|---|--------------|---|--------------|---|--------------|---|--------------|
| 0 | 0            | 0 | -0.01725091  | 0 | 0            | 0 | 0            |
| 0 | 0            | 0 | -0.031260362 | 0 | -0.043939474 | 0 | -0.037801971 |
| 0 | -0.01908289  | 0 | 0            | 0 | -0.017454398 | 0 | 0            |
| 0 | -0.019056825 | 0 | -0.017233373 | 0 | 0            | 0 | 0            |
| 0 | -0.031267794 | 0 | -0.0123772   | 0 | -0.03163593  | 0 | -0.055262836 |
| 0 | 0.36934138   | 0 | -0.038679123 | 0 | 0            | 0 | -0.058263364 |
| 0 | 0            | 0 | -0.006720991 | 0 | -0.011199216 | 0 | 0            |
| 0 | 0.36973615   | 0 | 0            | 0 | -0.038228191 | 0 | -0.057984069 |
| 0 | -0.022380159 | 0 | -0.006723881 | 0 | -0.011187343 | 0 | 0            |
| 0 | 0            | 0 | -0.008256761 | 0 | -0.009058199 | 0 | 0            |
| 0 | 0            | 0 | -0.014717409 | 0 | 0            | 0 | 0            |
| 0 | 0.002829536  | 0 | -0.014512882 | 0 | 0            | 0 | 0            |
| 0 | 0            | 0 | -0.012557424 | 0 | -0.002147097 | 0 | 0            |
| 0 | 0            | 0 | 0            | 0 | -0.014465009 | 0 | 0            |
| 0 | 0.002539051  | 0 | 0            | 0 | -0.014196442 | 0 | 0            |
| 0 | 0            | 0 | -0.012808327 | 0 | -0.001689801 | 0 | 0            |
| 0 | 0.002383277  | 0 | -0.013421072 | 0 | -0.000813566 | 0 | 0            |
| 0 | 0.035801198  | 0 | -0.027378205 | 0 | 0            | 0 | 0            |
| 0 | 0.035118898  | 0 | 0            | 0 | -0.027503633 | 0 | 0            |
| 0 | 0.35816006   | 0 | 0            | 0 | -0.031696396 | 0 | 0            |
| 0 | 0.35802801   | 0 | -0.031284547 | 0 | 0            | 0 | 0            |
| 0 | 0.36331251   | 0 | 0            | 0 | 0            | 0 | 0            |
| 0 | 0            | 0 | -0.02818559  | 0 | 0            | 0 | 0            |
| 0 | 0            | 0 | 0            | 0 | -0.028373547 | 0 | 0            |
| 0 | 0            | 0 | -0.008777575 | 0 | -0.006876935 | 0 | 0            |
| 0 | 0.039107854  | 0 | -0.03851215  | 0 | 0            | 0 | -0.056815385 |
| 0 | 0.038646639  | 0 | -0.031038281 | 0 | -0.007646424 | 0 | -0.05724281  |
| 0 | -0.027762153 | 0 | -0.008841739 | 0 | -0.006750062 | 0 | 0            |
| 0 | 0.038579873  | 0 | 0            | 0 | -0.038089549 | 0 | -0.056497325 |
| 0 | 0            | 0 | -0.02687502  | 0 | -0.052580331 | 0 | 0            |
| 0 | 0            | 0 | -0.039488859 | 0 | 0            | 0 | -0.057416362 |
| 0 | 0            | 0 | -0.030882569 | 0 | -0.008832565 | 0 | -0.057829573 |
| 0 | 0            | 0 | 0            | 0 | -0.039123876 | 0 | -0.057090771 |
| 0 | 0            | 0 | -0.01291085  | 0 | -0.020664931 | 0 | 0            |
| 0 | -0.027308285 | 0 | -0.026907468 | 0 | -0.052317476 | 0 | 0            |
| 0 | 0.35819631   | 0 | 0            | 0 | -0.036038153 | 0 | 0            |
| 0 | 0.35818462   | 0 | -0.035256285 | 0 | 0            | 0 | 0            |
| 0 | 0.04054693   | 0 | -0.014210563 | 0 | -0.017580342 | 0 | 0            |
| 0 | 0            | 0 | -0.013895914 | 0 | -0.018815897 | 0 | 0            |
| 0 | 0            | 0 | -0.028807087 | 0 | -0.017344651 | 0 | -0.061397936 |
| 0 | 0            | 0 | -0.052071144 | 0 | 0            | 0 | -0.039972439 |
| 0 | 0.38044069   | 0 | 0            | 0 | 0            | 0 | -0.058516698 |
| 0 | 0            | 0 | 0            | 0 | -0.051697587 | 0 | -0.039315443 |
| 0 | 0            | 0 | -0.064588647 | 0 | 0            | 0 | 0            |
| 0 | 0            | 0 | -0.009588682 | 0 | -0.027359377 | 0 | 0            |
| 0 | 0            | 0 | 0            | 0 | -0.064459284 | 0 | 0            |
| 0 | -0.008152745 | 0 | -0.009599743 | 0 | -0.027060062 | 0 | 0            |



|   |              |   |              |   |              |              |              |
|---|--------------|---|--------------|---|--------------|--------------|--------------|
| 0 | 0.038587193  | 0 | -0.042642405 | 0 | 0            | -0.023689183 | 0            |
| 0 | 0            | 0 | -0.043557655 | 0 | 0            | -0.02400811  | 0            |
| 0 | 0.038721101  | 0 | 0            | 0 | -0.041197404 | 0            | -0.022816629 |
| 0 | 0.052265113  | 0 | -0.039511913 | 0 | 0            | 0            | 0            |
| 0 | 0.35072676   | 0 | -0.040157114 | 0 | 0            | 0            | 0            |
| 0 | 0.052041487  | 0 | 0            | 0 | -0.039309361 | 0            | 0            |
| 0 | 0.046202483  | 0 | -0.046696671 | 0 | 0            | 0            | 0            |
| 0 | 0.36119768   | 0 | -0.005938478 | 0 | -0.038479062 | 0            | 0            |
| 0 | 0            | 0 | 0            | 0 | -0.042160909 | 0            | -0.023122393 |
| 0 | 0.35119353   | 0 | 0            | 0 | -0.039395462 | 0            | 0            |
| 0 | 0.06809013   | 0 | 0            | 0 | 0            | 0            | -0.034411218 |
| 0 | 0            | 0 | -0.040376559 | 0 | 0            | 0            | 0            |
| 0 | 0.045875431  | 0 | 0            | 0 | -0.045085975 | 0            | 0            |
| 0 | 0            | 0 | -0.047496633 | 0 | 0            | 0            | 0            |
| 0 | 0            | 0 | 0            | 0 | -0.04021404  | 0            | 0            |
| 0 | 0            | 0 | -0.052486864 | 0 | 0            | 0            | -0.022593986 |
| 0 | 0            | 0 | -0.048528851 | 0 | -0.0008883   | 0            | -0.026270125 |
| 0 | 0            | 0 | 0            | 0 | -0.045948368 | 0            | 0            |
| 0 | 0            | 0 | 0            | 0 | 0            | 0            | -0.034417448 |
| 0 | 0            | 0 | 0            | 0 | -0.050952114 | 0            | -0.021983854 |
| 0 | 0            | 0 | -0.066783864 | 0 | 0            | 0            | -0.023393318 |
| 0 | 0.084428761  | 0 | 0            | 0 | 0            | 0            | 0            |
| 0 | 0.044224497  | 0 | -0.03936825  | 0 | -0.000471123 | 0            | 0            |
| 0 | 0            | 0 | 0            | 0 | -0.066758509 | 0            | -0.022828459 |
| 0 | 0            | 0 | -0.039239227 | 0 | -0.001516225 | 0            | 0            |
| 0 | 0.51165349   | 0 | 0            | 0 | 0            | 0            | -0.052648234 |
| 0 | 0            | 0 | 0            | 0 | 0            | 0            | 0            |
| 0 | 0            | 0 | -0.04724715  | 0 | -0.007085915 | 0            | 0            |
| 0 | 0            | 0 | -0.031186677 | 0 | -0.017675268 | 0            | 0            |
| 0 | 0.36150584   | 0 | 0            | 0 | 0            | 0            | 0            |
| 0 | 0.36329423   | 0 | 0            | 0 | 0            | 0            | -0.020518547 |
| 0 | 0.38601509   | 0 | -0.056017081 | 0 | 0            | 0            | 0            |
| 0 | 0            | 0 | -0.038920895 | 0 | -0.028843409 | 0            | 0            |
| 0 | 0            | 0 | -0.057294758 | 0 | 0            | 0            | -0.032300715 |
| 0 | 0            | 0 | -0.066909674 | 0 | 0            | 0            | 0            |
| 0 | -0.003198932 | 0 | -0.066658388 | 0 | 0            | 0            | 0            |
| 0 | 0            | 0 | 0            | 0 | -0.067153635 | 0            | 0            |
| 0 | 0            | 0 | 0            | 0 | -0.057341847 | 0            | -0.031711075 |
| 0 | -0.013608712 | 0 | -0.056956289 | 0 | 0            | 0            | -0.031794695 |
| 0 | -0.00322856  | 0 | 0            | 0 | -0.066897025 | 0            | 0            |
| 0 | 0.35780373   | 0 | -0.049692829 | 0 | 0            | 0            | -0.028550278 |
| 0 | -0.013426845 | 0 | 0            | 0 | -0.057004233 | 0            | -0.031208407 |
| 0 | 0.35472112   | 0 | -0.05445631  | 0 | 0            | 0            | -0.02165156  |
| 0 | 0.3596788    | 0 | -0.040033392 | 0 | 0            | 0            | 0            |
| 0 | 0.38529762   | 0 | 0            | 0 | -0.054588725 | 0            | 0            |
| 0 | 0.35998033   | 0 | 0            | 0 | -0.040225411 | 0            | 0            |
| 0 | 0.05450059   | 0 | -0.054668785 | 0 | 0            | 0            | -0.019023789 |

|   |              |   |              |   |              |   |              |   |
|---|--------------|---|--------------|---|--------------|---|--------------|---|
| 0 | 0            | 0 | -0.035564584 | 0 | -0.020586622 | 0 | -0.029388809 | 0 |
| 0 | 0.35913869   | 0 | -0.024164731 | 0 | -0.016288157 | 0 | 0            | 0 |
| 0 | 0.35506973   | 0 | 0            | 0 | -0.05380661  | 0 | -0.020663101 | 0 |
| 0 | 0.070004388  | 0 | -0.060243297 | 0 | 0            | 0 | 0            | 0 |
| 0 | 0.35831602   | 0 | 0            | 0 | -0.048539358 | 0 | -0.027578108 | 0 |
| 0 | 0.085893507  | 0 | -0.067149819 | 0 | 0            | 0 | 0            | 0 |
| 0 | 0.37206161   | 0 | 0            | 0 | 0            | 0 | 0            | 0 |
| 0 | 0.37055413   | 0 | -0.0579564   | 0 | 0            | 0 | 0            | 0 |
| 0 | 0            | 0 | -0.055609246 | 0 | 0            | 0 | -0.019598045 | 0 |
| 0 | 0.054403821  | 0 | 0            | 0 | -0.052950022 | 0 | -0.018427513 | 0 |
| 0 | 0.08505703   | 0 | 0            | 0 | -0.066852373 | 0 | 0            | 0 |
| 0 | 0.3532329    | 0 | -0.051859955 | 0 | 0            | 0 | 0            | 0 |
| 0 | 0.069508616  | 0 | 0            | 0 | -0.059130766 | 0 | 0            | 0 |
| 0 | 0.057722808  | 0 | 0            | 0 | 0            | 0 | -0.019688579 | 0 |
| 0 | 0.35349216   | 0 | 0            | 0 | -0.052272441 | 0 | 0            | 0 |
| 0 | 0.36973392   | 0 | 0            | 0 | -0.057141114 | 0 | 0            | 0 |
| 0 | 0            | 0 | -0.060782924 | 0 | 0            | 0 | 0            | 0 |
| 0 | 0.059816999  | 0 | -0.053820873 | 0 | -0.001408157 | 0 | 0            | 0 |
| 0 | 0            | 0 | 0            | 0 | -0.053944146 | 0 | -0.018987946 | 0 |
| 0 | 0.072551892  | 0 | -0.058303428 | 0 | 0            | 0 | -0.023405949 | 0 |
| 0 | 0.054102835  | 0 | -0.049850185 | 0 | 0            | 0 | -0.03000475  | 0 |
| 0 | 0.056889411  | 0 | -0.023220692 | 0 | -0.017250421 | 0 | 0            | 0 |
| 0 | 0            | 0 | -0.067683232 | 0 | 0            | 0 | 0            | 0 |
| 0 | 0.052029669  | 0 | -0.050242254 | 0 | 0.001047531  | 0 | -0.028071767 | 0 |
| 0 | 0            | 0 | 0            | 0 | 0            | 0 | -0.020252427 | 0 |
| 0 | 0.39070466   | 0 | -0.066701414 | 0 | 0            | 0 | 0            | 0 |
| 0 | 0.072240966  | 0 | 0            | 0 | -0.058038649 | 0 | -0.022675565 | 0 |
| 0 | 0.35232095   | 0 | -0.035472757 | 0 | -0.016670355 | 0 | 0            | 0 |
| 0 | 0            | 0 | 0            | 0 | -0.059719417 | 0 | 0            | 0 |
| 0 | 0            | 0 | 0            | 0 | -0.067432573 | 0 | 0            | 0 |
| 0 | 0            | 0 | -0.057542126 | 0 | 0            | 0 | -0.018227399 | 0 |
| 0 | 0.054247611  | 0 | 0            | 0 | -0.048819041 | 0 | -0.029237001 | 0 |
| 0 | 0            | 0 | -0.053567769 | 0 | -0.002678003 | 0 | 0            | 0 |
| 0 | 0.35304727   | 0 | -0.054082    | 0 | 0            | 0 | 0            | 0 |
| 0 | 0            | 0 | 0            | 0 | 0            | 0 | -0.033338483 | 0 |
| 0 | 0            | 0 | -0.050760724 | 0 | 0            | 0 | -0.030083385 | 0 |
| 0 | 0            | 0 | -0.044210943 | 0 | -0.011233078 | 0 | -0.021350619 | 0 |
| 0 | -0.014495317 | 0 | -0.057217761 | 0 | 0            | 0 | -0.017637719 | 0 |
| 0 | 0            | 0 | -0.050254446 | 0 | 1.31E-05     | 0 | -0.028417775 | 0 |
| 0 | 0            | 0 | -0.023048455 | 0 | -0.018417531 | 0 | 0            | 0 |
| 0 | 0            | 0 | -0.059337584 | 0 | 0            | 0 | -0.02330982  | 0 |
| 0 | 0.35346722   | 0 | 0            | 0 | -0.054203794 | 0 | 0            | 0 |
| 0 | 0.39023054   | 0 | 0            | 0 | -0.06597303  | 0 | 0            | 0 |
| 0 | -0.015259577 | 0 | -0.044017731 | 0 | -0.011076773 | 0 | -0.020807945 | 0 |
| 0 | 0            | 0 | 0            | 0 | -0.056518223 | 0 | -0.017583804 | 0 |
| 0 | 0.078650904  | 0 | -0.066633087 | 0 | 0            | 0 | -0.01676832  | 0 |
| 0 | 0            | 0 | 0            | 0 | -0.059108243 | 0 | -0.022572192 | 0 |

|   |              |   |              |   |              |   |              |   |
|---|--------------|---|--------------|---|--------------|---|--------------|---|
| 0 | -0.014342019 | 0 | 0            | 0 | -0.056193193 | 0 | -0.016998872 | 0 |
| 0 | 0            | 0 | 0            | 0 | -0.04976726  | 0 | -0.029307164 | 0 |
| 0 | 0            | 0 | -0.046004141 | 0 | -0.010067758 | 0 | -0.014496011 | 0 |
| 0 | 0.35748378   | 0 | -0.057443947 | 0 | 0            | 0 | -0.023534593 | 0 |
| 0 | 0            | 0 | -0.043589188 | 0 | -0.014893503 | 0 | 0            | 0 |
| 0 | 0.35444582   | 0 | -0.046186076 | 0 | 0            | 0 | 0            | 0 |
| 0 | 0            | 0 | -0.029469994 | 0 | -0.023978854 | 0 | 0            | 0 |
| 0 | 0.077966473  | 0 | 0            | 0 | -0.065647828 | 0 | -0.01611286  | 0 |
| 0 | -0.005507594 | 0 | -0.029359949 | 0 | -0.023817491 | 0 | 0            | 0 |
| 0 | -0.009118666 | 0 | -0.043533569 | 0 | -0.014603037 | 0 | 0            | 0 |
| 0 | 0.35517424   | 0 | -0.038469366 | 0 | -0.008759655 | 0 | 0            | 0 |
| 0 | 0.35800839   | 0 | 0            | 0 | -0.056811446 | 0 | -0.022761982 | 0 |
| 0 | 0            | 0 | -0.068297113 | 0 | 0            | 0 | -0.02635141  | 0 |
| 0 | 0.3549874    | 0 | 0            | 0 | -0.045658228 | 0 | 0            | 0 |
| 0 | 0.071049379  | 0 | -0.037506795 | 0 | -0.016851349 | 0 | 0            | 0 |
| 0 | 0.079975408  | 0 | -0.052049831 | 0 | -0.014232659 | 0 | 0            | 0 |
| 0 | 0            | 0 | -0.067223258 | 0 | 0            | 0 | -0.017030391 | 0 |
| 0 | 0            | 0 | -0.056301782 | 0 | -0.008934791 | 0 | -0.024244167 | 0 |
| 0 | 0            | 0 | 0            | 0 | -0.067306391 | 0 | -0.025576262 | 0 |
| 0 | 0.37537444   | 0 | -0.022689057 | 0 | -0.041753624 | 0 | -0.057573178 | 0 |
| 0 | 0.37582445   | 0 | 0            | 0 | -0.063996052 | 0 | -0.056981522 | 0 |
| 0 | 0            | 0 | 0            | 0 | -0.066280142 | 0 | -0.016372834 | 0 |
| 0 | 0            | 0 | -0.037728227 | 0 | -0.017712463 | 0 | 0            | 0 |
| 0 | 0.37585193   | 0 | -0.063230074 | 0 | 0            | 0 | -0.05754459  | 0 |
| 0 | 0.066933827  | 0 | -0.048610536 | 0 | -0.008663077 | 0 | -0.023368793 | 0 |
| 0 | 0            | 0 | -0.051796734 | 0 | -0.015100283 | 0 | 0            | 0 |
| 0 | 0.056037306  | 0 | -0.041264908 | 0 | -0.004815678 | 0 | 0            | 0 |
| 0 | 0            | 0 | -0.050337557 | 0 | -0.00913377  | 0 | -0.03115246  | 0 |
| 0 | 0.35436344   | 0 | -0.041827884 | 0 | -0.011383759 | 0 | 0            | 0 |
| 0 | 0            | 0 | -0.048743637 | 0 | -0.00963241  | 0 | -0.023270129 | 0 |
| 0 | 0            | 0 | -0.041386376 | 0 | -0.005621222 | 0 | 0            | 0 |
| 0 | 0.35247026   | 0 | -0.058208862 | 0 | 0            | 0 | -0.006268525 | 0 |
| 0 | 0            | 0 | -0.051355164 | 0 | -0.017433634 | 0 | 0            | 0 |
| 0 | 0.35016777   | 0 | -0.057632642 | 0 | 0            | 0 | -0.006133501 | 0 |
| 0 | 0.35184674   | 0 | -0.054209095 | 0 | -0.004380341 | 0 | -0.004544665 | 0 |
| 0 | 0.35347513   | 0 | -0.052346615 | 0 | -0.005629545 | 0 | 0            | 0 |
| 0 | 0.35444131   | 0 | -0.057889183 | 0 | 0            | 0 | 0            | 0 |
| 0 | 0.3517457    | 0 | -0.050964208 | 0 | -0.006007652 | 0 | 0            | 0 |
| 0 | 0.35297918   | 0 | 0            | 0 | -0.057232037 | 0 | -0.005058285 | 0 |
| 0 | 0.34983455   | 0 | 0            | 0 | -0.056331911 | 0 | -0.005571437 | 0 |
| 0 | 0.35354457   | 0 | 0            | 0 | -0.056610748 | 0 | 0            | 0 |
| 0 | 0            | 0 | -0.022395355 | 0 | -0.042983308 | 0 | -0.05678519  | 0 |
| 0 | 0.38166175   | 0 | 0            | 0 | 0            | 0 | -0.020152305 | 0 |
| 0 | -0.042416595 | 0 | -0.022383975 | 0 | -0.042912278 | 0 | -0.055925033 | 0 |
| 0 | 0.061593131  | 0 | -0.057049356 | 0 | 0            | 0 | -0.006856426 | 0 |
| 0 | 0.061173445  | 0 | -0.053379739 | 0 | -0.003601953 | 0 | -0.00650845  | 0 |
| 0 | 0.061963096  | 0 | -0.054258532 | 0 | -0.00356816  | 0 | -0.005991358 | 0 |

|   |              |   |              |   |              |              |              |
|---|--------------|---|--------------|---|--------------|--------------|--------------|
| 0 | 0.37157604   | 0 | 0            | 0 | 0            | -0.024966302 | 0            |
| 0 | 0.062887353  | 0 | -0.052261792 | 0 | -0.004918246 | 0            | 0            |
| 0 | 0.37031775   | 0 | 0            | 0 | 0            | -0.024702627 | 0            |
| 0 | 0            | 0 | -0.079225006 | 0 | 0            | -0.019602425 | 0            |
| 0 | 0            | 0 | -0.045807766 | 0 | -0.029292435 | 0            | -0.022385677 |
| 0 | 0            | 0 | 0            | 0 | -0.079264515 | 0            | -0.018840232 |
| 0 | 0.061153731  | 0 | 0            | 0 | -0.055646424 | 0            | -0.006217111 |
| 0 | 0            | 0 | -0.057828925 | 0 | 0            | -0.007291143 | 0            |
| 0 | 0            | 0 | -0.053240415 | 0 | -0.00462913  | 0            | -0.007017348 |
| 0 | 0            | 0 | -0.054321347 | 0 | -0.004598198 | 0            | -0.00606838  |
| 0 | 0            | 0 | -0.051967617 | 0 | -0.006039974 | 0            | 0            |
| 0 | 0.39004784   | 0 | 0            | 0 | 0            | 0            | 0            |
| 0 | 0            | 0 | 0            | 0 | -0.056477541 | 0            | -0.006641916 |
| 0 | 0.082707591  | 0 | 0            | 0 | 0            | -0.02126374  | 0            |
| 0 | 0            | 0 | -0.045330157 | 0 | -0.034518389 | 0            | 0            |
| 0 | 0.38267489   | 0 | 0            | 0 | 0            | 0            | 0            |
| 0 | 0.36249991   | 0 | 0            | 0 | 0            | -0.018511593 | 0            |
| 0 | 0            | 0 | -0.05266682  | 0 | -0.025788803 | 0            | -0.019310441 |
| 0 | 0            | 0 | 0            | 0 | 0            | -0.021605816 | 0            |
| 0 | 0            | 0 | 0            | 0 | 0            | -0.023795614 | 0            |
| 0 | -0.003461225 | 0 | 0            | 0 | 0            | -0.023235696 | 0            |
| 0 | 0.37048339   | 0 | 0            | 0 | 0            | -0.013656662 | 0            |
| 0 | 0.3754883    | 0 | 0            | 0 | 0            | 0            | 0            |
| 0 | 0            | 0 | -0.051593969 | 0 | -0.017276159 | 0            | -0.011083483 |
| 0 | 0.10570348   | 0 | 0            | 0 | 0            | -0.013399241 | 0            |
| 0 | 0.37349271   | 0 | 0            | 0 | 0            | -0.013303643 | 0            |
| 0 | 0.38707471   | 0 | -0.080844291 | 0 | 0            | -0.017298186 | 0            |
| 0 | 0            | 0 | 0            | 0 | 0            | -0.013647275 | 0            |
| 0 | 0.36012878   | 0 | -0.068637989 | 0 | 0            | -0.019350904 | 0            |
| 0 | 0.38048044   | 0 | -0.074147674 | 0 | 0            | 0            | 0            |
| 0 | 0.38611419   | 0 | 0            | 0 | -0.080355075 | 0            | -0.016367893 |
| 0 | 0.36056001   | 0 | 0            | 0 | -0.068543283 | 0            | -0.018529959 |
| 0 | 0.38014557   | 0 | 0            | 0 | -0.074029597 | 0            | 0            |
| 0 | 0.39215935   | 0 | -0.047822651 | 0 | -0.034470789 | 0            | 0            |
| 0 | 0.3657071    | 0 | -0.015128658 | 0 | -0.05087116  | 0            | 0            |
| 0 | 0.3572906    | 0 | -0.042249039 | 0 | -0.02368957  | 0            | 0            |
| 0 | 0.36361008   | 0 | -0.042860221 | 0 | -0.033148498 | 0            | -0.027013319 |
| 0 | 0.3480716    | 0 | 0            | 0 | 0            | -0.006048581 | 0            |
| 0 | 0            | 0 | -0.074432202 | 0 | 0            | -0.015745337 | 0            |
| 0 | 0            | 0 | -0.047858596 | 0 | -0.022263159 | 0            | -0.019005555 |
| 0 | -0.026666903 | 0 | -0.074165384 | 0 | 0            | -0.015103134 | 0            |
| 0 | 0            | 0 | 0            | 0 | -0.074109454 | 0            | -0.01502204  |
| 0 | 0            | 0 | -0.05059827  | 0 | -0.031482432 | 0            | -0.017589707 |
| 0 | 0            | 0 | -0.04840046  | 0 | -0.026474283 | 0            | 0            |
| 0 | -0.027859699 | 0 | -0.047709419 | 0 | -0.022147868 | 0            | -0.018386409 |
| 0 | -0.026546603 | 0 | 0            | 0 | -0.073841845 | 0            | -0.014382864 |
| 0 | -0.027353412 | 0 | -0.050425795 | 0 | -0.03147912  | 0            | -0.016962492 |

|   |              |   |              |   |              |   |              |   |
|---|--------------|---|--------------|---|--------------|---|--------------|---|
| 0 | -0.02207325  | 0 | -0.04836312  | 0 | -0.026276234 | 0 | 0            | 0 |
| 0 | 0            | 0 | -0.049826715 | 0 | -0.023505674 | 0 | -0.009092055 | 0 |
| 0 | 0.35634161   | 0 | -0.039389959 | 0 | -0.047092919 | 0 | 0            | 0 |
| 0 | 0.35754912   | 0 | 0            | 0 | -0.087319238 | 0 | -0.004700143 | 0 |
| 0 | 0.36083907   | 0 | 0            | 0 | -0.087889768 | 0 | 0            | 0 |
| 0 | 0.35735883   | 0 | -0.086553742 | 0 | 0            | 0 | -0.005194987 | 0 |
| 0 | 0.36060812   | 0 | -0.086938889 | 0 | 0            | 0 | 0            | 0 |
| 0 | 0            | 0 | -0.041249183 | 0 | -0.047500384 | 0 | -0.005064967 | 0 |
| 0 | 0            | 0 | -0.040510573 | 0 | -0.04786773  | 0 | 0            | 0 |
| 0 | 0.34256665   | 0 | -0.044338616 | 0 | -0.036086305 | 0 | 0            | 0 |
| 0 | -0.015454417 | 0 | -0.041038312 | 0 | -0.047388163 | 0 | -0.004542948 | 0 |
| 0 | -0.014042669 | 0 | -0.040415345 | 0 | -0.047764929 | 0 | 0            | 0 |
| 0 | 0            | 0 | 0            | 0 | -0.087629738 | 0 | -0.004604786 | 0 |
| 0 | 0.3427021    | 0 | -0.079141246 | 0 | 0            | 0 | -0.000231961 | 0 |
| 0 | 0            | 0 | -0.086780212 | 0 | 0            | 0 | -0.005160219 | 0 |
| 0 | 0.34213754   | 0 | 0            | 0 | -0.078998627 | 0 | 0.000518831  | 0 |
| 0 | -0.015197184 | 0 | 0            | 0 | -0.087379268 | 0 | -0.004039036 | 0 |
| 0 | 0.35440017   | 0 | -0.048506167 | 0 | -0.036979474 | 0 | 0.006053482  | 0 |
| 0 | -0.015343748 | 0 | -0.086527468 | 0 | 0            | 0 | -0.0045928   | 0 |
| 0 | 0            | 0 | -0.040220285 | 0 | -0.047230926 | 0 | -0.001335583 | 0 |
| 0 | 0.35867412   | 0 | -0.045854728 | 0 | -0.041090241 | 0 | -0.004986561 | 0 |
| 0 | 0.36194806   | 0 | -0.045500199 | 0 | -0.041885908 | 0 | 0            | 0 |
| 0 | 0.35525097   | 0 | -0.046293529 | 0 | -0.039076669 | 0 | -0.003055017 | 0 |
| 0 | 0.36002143   | 0 | -0.086016223 | 0 | 0            | 0 | -0.00455715  | 0 |
| 0 | 0.36031944   | 0 | 0            | 0 | -0.086408326 | 0 | -0.003978769 | 0 |
| 0 | 0            | 0 | -0.044012575 | 0 | -0.036193071 | 0 | -0.000650473 | 0 |
| 0 | -0.018169442 | 0 | -0.04384459  | 0 | -0.036062549 | 0 | -8.60E-05    | 0 |
| 0 | 0            | 0 | -0.04590351  | 0 | -0.041284981 | 0 | -0.004966264 | 0 |
| 0 | -0.022983948 | 0 | -0.045949668 | 0 | -0.040923108 | 0 | -0.004379185 | 0 |
| 0 | 0.36186829   | 0 | 0            | 0 | 0            | 0 | -0.012234087 | 0 |
| 0 | 0.49088985   | 0 | -0.027557005 | 0 | 0            | 0 | -0.053297024 | 0 |
| 0 | 0.49095883   | 0 | 0            | 0 | -0.026866156 | 0 | -0.053122108 | 0 |
| 0 | 0.49034826   | 0 | 0            | 0 | 0            | 0 | -0.054057294 | 0 |
| 0 | 0.49050892   | 0 | 0            | 0 | 0            | 0 | -0.053826681 | 0 |
| 0 | 0.49229055   | 0 | 0            | 0 | 0            | 0 | -0.054791114 | 0 |
| 0 | 0            | 0 | -0.028121338 | 0 | 0            | 0 | -0.049889512 | 0 |
| 0 | 0            | 0 | 0            | 0 | -0.027229451 | 0 | -0.049671209 | 0 |
| 0 | 0            | 0 | -0.027085662 | 0 | 0            | 0 | -0.052947313 | 0 |
| 0 | 0            | 0 | -0.029199438 | 0 | 0            | 0 | -0.052539669 | 0 |
| 0 | 0            | 0 | 0            | 0 | -0.028787174 | 0 | -0.052330262 | 0 |
| 0 | 0            | 0 | 0            | 0 | -0.026093702 | 0 | -0.052795801 | 0 |
| 0 | -0.017954111 | 0 | -0.02681092  | 0 | 0            | 0 | -0.051902692 | 0 |
| 0 | 0            | 0 | 0            | 0 | 0            | 0 | -0.052766206 | 0 |
| 0 | -0.018404593 | 0 | 0            | 0 | -0.025733911 | 0 | -0.051754443 | 0 |
| 0 | 0            | 0 | -0.026185183 | 0 | 0            | 0 | -0.050236738 | 0 |
| 0 | 0            | 0 | -0.030164877 | 0 | 0.004052925  | 0 | -0.050138713 | 0 |
| 0 | 0            | 0 | -0.027452914 | 0 | 0            | 0 | -0.05353716  | 0 |

|   |              |   |              |   |              |   |              |   |
|---|--------------|---|--------------|---|--------------|---|--------------|---|
| 0 | 0            | 0 | -0.024735104 | 0 | -0.003158121 | 0 | -0.053144129 | 0 |
| 0 | 0            | 0 | 0            | 0 | -0.024932821 | 0 | -0.050040773 | 0 |
| 0 | -0.044294558 | 0 | -0.029169903 | 0 | 0            | 0 | -0.051462626 | 0 |
| 0 | 0            | 0 | 0            | 0 | -0.026714537 | 0 | -0.053340457 | 0 |
| 0 | -0.044203237 | 0 | 0            | 0 | -0.028768455 | 0 | -0.051256756 | 0 |
| 0 | 0            | 0 | 0            | 0 | 0            | 0 | -0.055214257 | 0 |
| 0 | 0            | 0 | 0            | 0 | 0            | 0 | -0.053410442 | 0 |
| 0 | 0            | 0 | -0.040990466 | 0 | 0            | 0 | -0.053787107 | 0 |
| 0 | -0.011622327 | 0 | 0            | 0 | 0            | 0 | -0.052342492 | 0 |
| 0 | 0            | 0 | 0            | 0 | -0.040448017 | 0 | -0.053393848 | 0 |
| 0 | -0.048422616 | 0 | -0.027351983 | 0 | 0            | 0 | -0.052478005 | 0 |
| 0 | 0            | 0 | 0            | 0 | 0            | 0 | -0.054304771 | 0 |
| 0 | -0.040185884 | 0 | 0            | 0 | 0            | 0 | -0.054198038 | 0 |
| 0 | -0.048385205 | 0 | -0.024655403 | 0 | -0.003132611 | 0 | -0.052090121 | 0 |
| 0 | -0.048384702 | 0 | 0            | 0 | -0.026613797 | 0 | -0.052282138 | 0 |
| 0 | -0.016442473 | 0 | 0            | 0 | 0            | 0 | -0.053219589 | 0 |
| 0 | 0            | 0 | -0.028417192 | 0 | 0            | 0 | -0.04378828  | 0 |
| 0 | 0            | 0 | 0            | 0 | -0.027890012 | 0 | -0.043587909 | 0 |
| 0 | 0.020896175  | 0 | -0.043419239 | 0 | 0            | 0 | -0.049336767 | 0 |
| 0 | 0.020040452  | 0 | 0            | 0 | -0.04311427  | 0 | -0.049021818 | 0 |
| 0 | 0            | 0 | -0.044590695 | 0 | 0            | 0 | -0.050182513 | 0 |
| 0 | 0            | 0 | 0            | 0 | -0.044373691 | 0 | -0.049857963 | 0 |
| 0 | 0            | 0 | -0.028894153 | 0 | -0.018540202 | 0 | -0.05151742  | 0 |
| 0 | 0.485956     | 0 | -0.031646427 | 0 | 0            | 0 | 0            | 0 |
| 0 | 0.48595526   | 0 | 0            | 0 | -0.031807682 | 0 | 0            | 0 |
| 0 | 0.48646204   | 0 | -0.029383317 | 0 | 0            | 0 | 0            | 0 |
| 0 | 0.48657853   | 0 | 0            | 0 | -0.028936435 | 0 | 0            | 0 |
| 0 | 0            | 0 | -0.047523025 | 0 | 0            | 0 | -0.05349837  | 0 |
| 0 | 0            | 0 | 0            | 0 | -0.047572123 | 0 | -0.053093516 | 0 |
| 0 | 0            | 0 | -0.020903334 | 0 | -0.008164995 | 0 | -0.040561921 | 0 |
| 0 | -0.029511936 | 0 | -0.047139776 | 0 | 0            | 0 | -0.05252298  | 0 |
| 0 | -0.029573049 | 0 | 0            | 0 | -0.047181698 | 0 | -0.05212158  | 0 |
| 0 | 0.02713767   | 0 | 0            | 0 | 0            | 0 | -0.053645252 | 0 |
| 0 | 0.48831758   | 0 | -0.019704489 | 0 | -0.010891953 | 0 | 0            | 0 |
| 0 | 0.48832637   | 0 | -0.03008162  | 0 | 0            | 0 | 0            | 0 |
| 0 | 0.48664101   | 0 | 0            | 0 | 0            | 0 | -0.051492556 | 0 |
| 0 | 0.48838087   | 0 | 0            | 0 | -0.029974584 | 0 | 0            | 0 |
| 0 | 0.4889468    | 0 | 0            | 0 | -0.056730913 | 0 | -0.049317811 | 0 |
| 0 | 0.48902258   | 0 | -0.056224882 | 0 | 0            | 0 | -0.04974538  | 0 |
| 0 | 0            | 0 | 0            | 0 | 0            | 0 | -0.054579712 | 0 |
| 0 | 0.48567049   | 0 | 0            | 0 | 0            | 0 | 0            | 0 |
| 0 | 0.48619477   | 0 | 0            | 0 | 0            | 0 | 0            | 0 |
| 0 | 0.3356151    | 0 | 0            | 0 | 0            | 0 | 0.002283142  | 0 |
| 0 | 0.48779712   | 0 | 0            | 0 | 0            | 0 | 0            | 0 |
| 0 | 0.4875342    | 0 | 0            | 0 | 0            | 0 | -0.055631004 | 0 |
| 0 | 0.49085404   | 0 | -0.052322156 | 0 | 0            | 0 | -0.050883388 | 0 |
| 0 | 0            | 0 | -0.024415433 | 0 | -0.001647824 | 0 | -0.040416916 | 0 |

|   |              |   |              |   |              |   |              |   |
|---|--------------|---|--------------|---|--------------|---|--------------|---|
| 0 | 0            | 0 | -0.025060488 | 0 | -0.020026641 | 0 | -0.045300705 | 0 |
| 0 | 0            | 0 | -0.031059962 | 0 | 0            | 0 | 0            | 0 |
| 0 | 0            | 0 | 0            | 0 | -0.030766954 | 0 | 0            | 0 |
| 0 | 0.49104972   | 0 | 0            | 0 | -0.05180988  | 0 | -0.050521025 | 0 |
| 0 | 0.00521662   | 0 | -0.030948479 | 0 | 0            | 0 | 0            | 0 |
| 0 | 0            | 0 | -0.021455863 | 0 | -0.010145642 | 0 | 0            | 0 |
| 0 | 0            | 0 | -0.031193003 | 0 | 0            | 0 | 0            | 0 |
| 0 | 0            | 0 | 0            | 0 | -0.031042006 | 0 | 0            | 0 |
| 0 | 0.004604791  | 0 | 0            | 0 | -0.030718097 | 0 | 0            | 0 |
| 0 | 0.48200022   | 0 | -0.04593877  | 0 | 0            | 0 | 0            | 0 |
| 0 | 0.48208918   | 0 | 0            | 0 | -0.046163286 | 0 | 0            | 0 |
| 0 | 0            | 0 | -0.03174355  | 0 | 0            | 0 | 0            | 0 |
| 0 | 0            | 0 | 0            | 0 | -0.031786863 | 0 | 0            | 0 |
| 0 | -0.02324064  | 0 | -0.031650877 | 0 | 0            | 0 | 0            | 0 |
| 0 | -0.023274742 | 0 | 0            | 0 | -0.031687737 | 0 | 0            | 0 |
| 0 | 0            | 0 | -0.017660636 | 0 | -0.014953707 | 0 | 0            | 0 |
| 0 | 0            | 0 | -0.029646754 | 0 | 0            | 0 | 0            | 0 |
| 0 | 0            | 0 | -0.02322611  | 0 | -0.006652069 | 0 | 0            | 0 |
| 0 | 0            | 0 | -0.023782338 | 0 | -0.005872303 | 0 | 0            | 0 |
| 0 | 0.000319879  | 0 | -0.029348008 | 0 | 0            | 0 | 0            | 0 |
| 0 | -6.33E-06    | 0 | -0.024074412 | 0 | -0.005427436 | 0 | 0            | 0 |
| 0 | 0            | 0 | 0            | 0 | -0.029240749 | 0 | 0            | 0 |
| 0 | -0.000279391 | 0 | 0            | 0 | -0.028853804 | 0 | 0            | 0 |
| 0 | -0.026552539 | 0 | -0.017606523 | 0 | -0.014918534 | 0 | 0            | 0 |
| 0 | 0.482677     | 0 | 0            | 0 | -0.050364086 | 0 | 0            | 0 |
| 0 | 0.48264436   | 0 | -0.049819601 | 0 | 0            | 0 | 0            | 0 |
| 0 | 0.008738915  | 0 | 0            | 0 | 0            | 0 | 0            | 0 |
| 0 | 0            | 0 | 0            | 0 | 0            | 0 | 0            | 0 |
| 0 | 0.031068701  | 0 | -0.041336409 | 0 | 0            | 0 | 0            | 0 |
| 0 | 0            | 0 | -0.019737771 | 0 | -0.011076326 | 0 | 0            | 0 |
| 0 | 0.03013765   | 0 | 0            | 0 | -0.04126434  | 0 | 0            | 0 |
| 0 | 0            | 0 | -0.019041564 | 0 | -0.012640492 | 0 | 0            | 0 |
| 0 | 0            | 0 | -0.022218692 | 0 | -0.035488441 | 0 | -0.049316282 | 0 |
| 0 | 0            | 0 | -0.04241595  | 0 | 0            | 0 | 0            | 0 |
| 0 | 0            | 0 | 0            | 0 | -0.042433427 | 0 | 0            | 0 |
| 0 | -0.030915083 | 0 | -0.019779454 | 0 | -0.010869178 | 0 | 0            | 0 |
| 0 | -0.033216328 | 0 | -0.022076515 | 0 | -0.035300789 | 0 | -0.048297712 | 0 |
| 0 | 0            | 0 | -0.024145369 | 0 | -0.022877242 | 0 | 0            | 0 |
| 0 | 0.034686772  | 0 | -0.051315577 | 0 | 0            | 0 | -0.04966042  | 0 |
| 0 | 0.034128909  | 0 | -0.039778407 | 0 | -0.011995977 | 0 | -0.049812911 | 0 |
| 0 | 0.48146306   | 0 | 0            | 0 | 0            | 0 | 0            | 0 |
| 0 | 0.033967824  | 0 | 0            | 0 | -0.050779539 | 0 | -0.049256618 | 0 |
| 0 | 0            | 0 | -0.039511833 | 0 | -0.013624646 | 0 | -0.050642666 | 0 |
| 0 | 0            | 0 | -0.052603389 | 0 | 0            | 0 | -0.050505428 | 0 |
| 0 | 0.035534149  | 0 | -0.025110241 | 0 | -0.020717196 | 0 | 0            | 0 |
| 0 | 0            | 0 | 0            | 0 | -0.052147283 | 0 | -0.050089961 | 0 |
| 0 | 0            | 0 | -0.024634145 | 0 | -0.022424082 | 0 | 0            | 0 |

|   |              |   |              |   |              |   |              |   |
|---|--------------|---|--------------|---|--------------|---|--------------|---|
| 0 | 0            | 0 | -0.038084524 | 0 | -0.020312545 | 0 | -0.053592571 | 0 |
| 0 | 0.48620946   | 0 | -0.017373033 | 0 | -0.041599172 | 0 | 0            | 0 |
| 0 | 0            | 0 | -0.020533497 | 0 | -0.030653817 | 0 | 0            | 0 |
| 0 | -0.012767478 | 0 | -0.020512096 | 0 | -0.030242826 | 0 | 0            | 0 |
| 0 | 0.49431552   | 0 | 0            | 0 | 0            | 0 | -0.052247324 | 0 |
| 0 | 0.48821106   | 0 | -0.054082596 | 0 | 0            | 0 | 0            | 0 |
| 0 | 0.48831364   | 0 | -0.034390547 | 0 | -0.020442307 | 0 | 0            | 0 |
| 0 | 0.4883898    | 0 | 0            | 0 | -0.054108148 | 0 | 0            | 0 |
| 0 | 0.3748686    | 0 | 0            | 0 | 0            | 0 | -0.061572895 | 0 |
| 0 | 0.37474331   | 0 | 0            | 0 | 0            | 0 | -0.059757328 | 0 |
| 0 | 0.37285674   | 0 | -0.014549804 | 0 | 0            | 0 | -0.059626286 | 0 |
| 0 | 0.37300851   | 0 | 0            | 0 | -0.014238882 | 0 | -0.059519305 | 0 |
| 0 | 0.372366     | 0 | -0.011904526 | 0 | 0            | 0 | -0.060284462 | 0 |
| 0 | 0.3726835    | 0 | 0            | 0 | -0.010969274 | 0 | -0.06022554  | 0 |
| 0 | 0.37538805   | 0 | 0            | 0 | 0            | 0 | -0.060706213 | 0 |
| 0 | 0            | 0 | -0.014195942 | 0 | 0            | 0 | -0.058541606 | 0 |
| 0 | 0            | 0 | 0            | 0 | -0.013288605 | 0 | -0.05843521  | 0 |
| 0 | 0            | 0 | 0            | 0 | 0            | 0 | -0.060873812 | 0 |
| 0 | 0.37398286   | 0 | -0.012384624 | 0 | 0            | 0 | -0.060701749 | 0 |
| 0 | 0.37406958   | 0 | -0.015027678 | 0 | 0.002624629  | 0 | -0.060541323 | 0 |
| 0 | -0.01021885  | 0 | 0            | 0 | 0            | 0 | -0.060045198 | 0 |
| 0 | 0.3742207    | 0 | 0            | 0 | -0.011732585 | 0 | -0.060618581 | 0 |
| 0 | 0            | 0 | -0.015072376 | 0 | 0            | 0 | -0.060801855 | 0 |
| 0 | 0            | 0 | 0            | 0 | -0.014583148 | 0 | -0.060689352 | 0 |
| 0 | 0            | 0 | -0.014653508 | 0 | 0            | 0 | -0.058993492 | 0 |
| 0 | 0            | 0 | 0            | 0 | -0.014026751 | 0 | -0.058899995 | 0 |
| 0 | -0.012383606 | 0 | -0.014538613 | 0 | 0            | 0 | -0.058153425 | 0 |
| 0 | -0.012591744 | 0 | 0            | 0 | -0.013857586 | 0 | -0.058061554 | 0 |
| 0 | -0.038963972 | 0 | -0.015116889 | 0 | 0            | 0 | -0.059968204 | 0 |
| 0 | 0            | 0 | -0.017961967 | 0 | 0.003856551  | 0 | -0.056936202 | 0 |
| 0 | -0.038935891 | 0 | 0            | 0 | -0.014632035 | 0 | -0.059853535 | 0 |
| 0 | 0.049682097  | 0 | -0.03375768  | 0 | -0.02015306  | 0 | 0            | 0 |
| 0 | 0            | 0 | -0.013148315 | 0 | -0.002227717 | 0 | -0.059234682 | 0 |
| 0 | 0            | 0 | -0.018855472 | 0 | 0.006590146  | 0 | -0.059975023 | 0 |
| 0 | 0            | 0 | -0.012536961 | 0 | 0            | 0 | -0.059994153 | 0 |
| 0 | 0            | 0 | -0.033453447 | 0 | -0.021802439 | 0 | 0            | 0 |
| 0 | 0            | 0 | 0            | 0 | -0.011591013 | 0 | -0.059923721 | 0 |
| 0 | -0.042762741 | 0 | -0.013077758 | 0 | -0.00236146  | 0 | -0.058346819 | 0 |
| 0 | -0.018108554 | 0 | -0.019504776 | 0 | 0.00745602   | 0 | -0.059150354 | 0 |
| 0 | -0.018359711 | 0 | -0.012383327 | 0 | 0            | 0 | -0.059136266 | 0 |
| 0 | -0.018507326 | 0 | 0            | 0 | -0.01137665  | 0 | -0.059068233 | 0 |
| 0 | 0.37308586   | 0 | 0            | 0 | 0            | 0 | -0.060824086 | 0 |
| 0 | 0.50111326   | 0 | -0.032438102 | 0 | -0.044814082 | 0 | -0.049916067 | 0 |
| 0 | 0            | 0 | -0.020831818 | 0 | 0.009385768  | 0 | -0.057356208 | 0 |
| 0 | 0.50120173   | 0 | 0            | 0 | -0.076347094 | 0 | -0.049515968 | 0 |
| 0 | 0.015758017  | 0 | -0.02566955  | 0 | 0            | 0 | -0.059118548 | 0 |
| 0 | 0.015412949  | 0 | 0            | 0 | -0.025200633 | 0 | -0.058917922 | 0 |



|   |              |   |              |   |              |   |              |   |
|---|--------------|---|--------------|---|--------------|---|--------------|---|
| 0 | 0            | 0 | -0.015806995 | 0 | 0.002871332  | 0 | -0.060372333 | 0 |
| 0 | 0            | 0 | -0.026494292 | 0 | 0            | 0 | -0.059811747 | 0 |
| 0 | 0.50132158   | 0 | -0.075821472 | 0 | 0            | 0 | -0.050166704 | 0 |
| 0 | 0            | 0 | 0            | 0 | -0.026087613 | 0 | -0.059603811 | 0 |
| 0 | 0            | 0 | -0.021326728 | 0 | -0.006832282 | 0 | -0.060950848 | 0 |
| 0 | 0.36800978   | 0 | -0.030405132 | 0 | 0            | 0 | -0.0572406   | 0 |
| 0 | -0.0478087   | 0 | -0.01581022  | 0 | 0.002870512  | 0 | -0.059494134 | 0 |
| 0 | 0.36822895   | 0 | 0            | 0 | -0.030309452 | 0 | -0.057008199 | 0 |
| 0 | 0.36844438   | 0 | 0            | 0 | -0.033560664 | 0 | -0.060345551 | 0 |
| 0 | 0.36833506   | 0 | -0.03335272  | 0 | 0            | 0 | -0.060643651 | 0 |
| 0 | 0            | 0 | -0.014208424 | 0 | -0.000522427 | 0 | -0.051039241 | 0 |
| 0 | 0.022942987  | 0 | -0.020531597 | 0 | -0.010049899 | 0 | -0.056168735 | 0 |
| 0 | 0            | 0 | -0.020228965 | 0 | -0.011303812 | 0 | -0.056785658 | 0 |
| 0 | 0            | 0 | -0.01657837  | 0 | -0.018138664 | 0 | -0.060115663 | 0 |
| 0 | -0.027586953 | 0 | -0.016522758 | 0 | -0.0179441   | 0 | -0.059329985 | 0 |
| 0 | 0            | 0 | -0.032269059 | 0 | -0.04544533  | 0 | -0.049602235 | 0 |
| 0 | -0.043424164 | 0 | -0.032201202 | 0 | -0.045322043 | 0 | -0.048545883 | 0 |
| 0 | 0.36054303   | 0 | -0.016040038 | 0 | 0            | 0 | 0            | 0 |
| 0 | 0.36066325   | 0 | 0            | 0 | -0.016064284 | 0 | 0            | 0 |
| 0 | 0.36334778   | 0 | 0            | 0 | 0            | 0 | 0            | 0 |
| 0 | 0.3711532    | 0 | -0.012026934 | 0 | -0.031489234 | 0 | -0.056452662 | 0 |
| 0 | 0.36086609   | 0 | 0            | 0 | -0.016806067 | 0 | 0            | 0 |
| 0 | 0.36081095   | 0 | -0.016575346 | 0 | 0            | 0 | 0            | 0 |
| 0 | 0.4984148    | 0 | -0.026716552 | 0 | -0.052360811 | 0 | 0            | 0 |
| 0 | 0.36227113   | 0 | -0.006263573 | 0 | -0.010965026 | 0 | 0            | 0 |
| 0 | 0.36199986   | 0 | -0.014062176 | 0 | 0            | 0 | 0            | 0 |
| 0 | 0.36218183   | 0 | 0            | 0 | -0.01381876  | 0 | 0            | 0 |
| 0 | 0.36195087   | 0 | -0.012263519 | 0 | -0.001563047 | 0 | 0            | 0 |
| 0 | 0.01007529   | 0 | -0.016481751 | 0 | 0            | 0 | 0            | 0 |
| 0 | 0.009738672  | 0 | 0            | 0 | -0.0163473   | 0 | 0            | 0 |
| 0 | 0            | 0 | -0.016652755 | 0 | 0            | 0 | 0            | 0 |
| 0 | 0            | 0 | -0.011223026 | 0 | -0.005792076 | 0 | 0            | 0 |
| 0 | 0            | 0 | 0            | 0 | -0.016576866 | 0 | 0            | 0 |
| 0 | 0.008510297  | 0 | -0.010869775 | 0 | -0.00597786  | 0 | 0            | 0 |
| 0 | 0            | 0 | -0.010301071 | 0 | -0.006754592 | 0 | 0            | 0 |
| 0 | 0.3562291    | 0 | -0.027594608 | 0 | 0            | 0 | 0            | 0 |
| 0 | 0.35641184   | 0 | 0            | 0 | -0.027791124 | 0 | 0            | 0 |
| 0 | 0.3636493    | 0 | -0.00828996  | 0 | -0.006691038 | 0 | 0            | 0 |
| 0 | 0            | 0 | -0.00802044  | 0 | -0.009704239 | 0 | 0            | 0 |
| 0 | -0.019078869 | 0 | -0.008149311 | 0 | -0.009569419 | 0 | 0            | 0 |
| 0 | 0.069294471  | 0 | -0.056968901 | 0 | 0            | 0 | 0            | 0 |
| 0 | 0.36950594   | 0 | -0.038840816 | 0 | 0            | 0 | -0.057771844 | 0 |
| 0 | 0.36929347   | 0 | -0.030416407 | 0 | -0.008640739 | 0 | -0.058192253 | 0 |
| 0 | 0.36989355   | 0 | 0            | 0 | -0.038479981 | 0 | -0.057452    | 0 |
| 0 | 0.068689686  | 0 | 0            | 0 | -0.056363216 | 0 | 0            | 0 |
| 0 | 0            | 0 | -0.057529935 | 0 | 0            | 0 | 0            | 0 |
| 0 | 0            | 0 | -0.012174095 | 0 | -0.002679202 | 0 | 0            | 0 |

|   |              |   |              |   |              |   |              |   |
|---|--------------|---|--------------|---|--------------|---|--------------|---|
| 0 | 0.002782     | 0 | -0.01279798  | 0 | -0.0018066   | 0 | 0            | 0 |
| 0 | 0            | 0 | 0            | 0 | -0.056974237 | 0 | 0            | 0 |
| 0 | 0.035304127  | 0 | -0.015291505 | 0 | -0.012654435 | 0 | 0            | 0 |
| 0 | 0            | 0 | -0.064799307 | 0 | 0            | 0 | -0.033634196 | 0 |
| 0 | 0.35795342   | 0 | -0.013416616 | 0 | -0.01867349  | 0 | 0            | 0 |
| 0 | 0.049112388  | 0 | -0.043885965 | 0 | 0            | 0 | -0.038625285 | 0 |
| 0 | 0            | 0 | -0.014986385 | 0 | -0.013820368 | 0 | 0            | 0 |
| 0 | 0            | 0 | 0            | 0 | -0.064232794 | 0 | -0.032954955 | 0 |
| 0 | 0.049086629  | 0 | 0            | 0 | -0.043189412 | 0 | -0.038041763 | 0 |
| 0 | 0.038773195  | 0 | -0.030126789 | 0 | -0.008771944 | 0 | -0.056732674 | 0 |
| 0 | 0            | 0 | -0.044779369 | 0 | 0            | 0 | -0.038733939 | 0 |
| 0 | 0            | 0 | 0            | 0 | -0.044121305 | 0 | -0.038143132 | 0 |
| 0 | 0            | 0 | -0.029978918 | 0 | -0.00994865  | 0 | -0.057323574 | 0 |
| 0 | 0.35805977   | 0 | -0.009119799 | 0 | -0.027205082 | 0 | 0            | 0 |
| 0 | 0            | 0 | -0.040566026 | 0 | -0.012025392 | 0 | -0.039874759 | 0 |
| 0 | 0.35321874   | 0 | -0.043049036 | 0 | 0            | 0 | -0.024161429 | 0 |
| 0 | 0.35374123   | 0 | 0            | 0 | -0.041648283 | 0 | -0.023284985 | 0 |
| 0 | 0            | 0 | -0.042660603 | 0 | -0.023027362 | 0 | 0            | 0 |
| 0 | 0.37300715   | 0 | -0.04754391  | 0 | 0            | 0 | 0            | 0 |
| 0 | 0.35170679   | 0 | -0.039850957 | 0 | 0            | 0 | 0            | 0 |
| 0 | 0.35206823   | 0 | 0            | 0 | -0.039689321 | 0 | 0            | 0 |
| 0 | 0.37229563   | 0 | 0            | 0 | -0.045958554 | 0 | 0            | 0 |
| 0 | 0.36673109   | 0 | 0            | 0 | 0            | 0 | -0.034697951 | 0 |
| 0 | 0.079754697  | 0 | 0            | 0 | 0            | 0 | -0.028949595 | 0 |
| 0 | 0.040951063  | 0 | -0.046234373 | 0 | 0            | 0 | -0.01877036  | 0 |
| 0 | 0            | 0 | -0.047019005 | 0 | 0            | 0 | -0.019316478 | 0 |
| 0 | 0.038805066  | 0 | -0.048892497 | 0 | 0.006561161  | 0 | -0.023782477 | 0 |
| 0 | 0.0408836    | 0 | 0            | 0 | -0.044345716 | 0 | -0.018276486 | 0 |
| 0 | 0.40025294   | 0 | 0            | 0 | 0            | 0 | 0            | 0 |
| 0 | 0            | 0 | 0            | 0 | 0            | 0 | -0.029302435 | 0 |
| 0 | 0            | 0 | -0.048874912 | 0 | 0.005582048  | 0 | -0.024087219 | 0 |
| 0 | 0.052003029  | 0 | -0.030792737 | 0 | -0.009165926 | 0 | 0            | 0 |
| 0 | 0            | 0 | 0            | 0 | -0.045183672 | 0 | -0.018810725 | 0 |
| 0 | 0.35072132   | 0 | -0.038875674 | 0 | -0.001347852 | 0 | 0            | 0 |
| 0 | 0.046315291  | 0 | -0.049578385 | 0 | 0.003021459  | 0 | 0            | 0 |
| 0 | 0            | 0 | -0.030784008 | 0 | -0.01008977  | 0 | 0            | 0 |
| 0 | 0.39587206   | 0 | -0.067429029 | 0 | 0            | 0 | 0            | 0 |
| 0 | 0.39573616   | 0 | 0            | 0 | -0.067674776 | 0 | 0            | 0 |
| 0 | 0            | 0 | -0.049263516 | 0 | 0.001852423  | 0 | 0            | 0 |
| 0 | 0            | 0 | -0.051784587 | 0 | -0.000727858 | 0 | -0.022582332 | 0 |
| 0 | 0.35739103   | 0 | -0.056780015 | 0 | 0            | 0 | -0.03252777  | 0 |
| 0 | 0            | 0 | -0.067923582 | 0 | 0            | 0 | -0.025915985 | 0 |
| 0 | 0.35768317   | 0 | 0            | 0 | -0.056827923 | 0 | -0.031943554 | 0 |
| 0 | -0.01017736  | 0 | -0.067639699 | 0 | 0            | 0 | -0.025321637 | 0 |
| 0 | 0            | 0 | 0            | 0 | -0.067882113 | 0 | -0.02530503  | 0 |
| 0 | 0            | 0 | -0.042171956 | 0 | -0.025830867 | 0 | -0.023196176 | 0 |
| 0 | -0.010017501 | 0 | 0            | 0 | -0.067599836 | 0 | -0.024723357 | 0 |

|   |              |   |              |   |              |              |              |
|---|--------------|---|--------------|---|--------------|--------------|--------------|
| 0 | 0.37966696   | 0 | -0.055519632 | 0 | 0            | -0.018928701 | 0            |
| 0 | 0.40009426   | 0 | -0.061228603 | 0 | 0            | 0            | 0            |
| 0 | 0.066203357  | 0 | -0.060963202 | 0 | 0            | -0.022761415 | 0            |
| 0 | 0.3791761    | 0 | 0            | 0 | -0.053827219 | 0            | -0.01832143  |
| 0 | 0.38962049   | 0 | -0.068218093 | 0 | 0            | 0            | 0            |
| 0 | 0.39949218   | 0 | 0            | 0 | -0.060154098 | 0            | 0            |
| 0 | 0.38920644   | 0 | 0            | 0 | -0.067964015 | 0            | 0            |
| 0 | 0.36554504   | 0 | 0            | 0 | 0            | -0.019614506 | 0            |
| 0 | 0.065892445  | 0 | 0            | 0 | -0.059536539 | 0            | -0.022086047 |
| 0 | 0.38598109   | 0 | -0.054009914 | 0 | -0.002100928 | 0            | 0            |
| 0 | 0            | 0 | -0.03911674  | 0 | -0.029185551 | 0            | 0            |
| 0 | 0            | 0 | -0.036900917 | 0 | -0.021307912 | 0            | -0.032200382 |
| 0 | -0.003329101 | 0 | -0.039106379 | 0 | -0.028935636 | 0            | 0            |
| 0 | 0            | 0 | -0.061519856 | 0 | 0            | -0.023125133 | 0            |
| 0 | 0.084120073  | 0 | -0.068189461 | 0 | 0            | -0.016686565 | 0            |
| 0 | 0.36468428   | 0 | -0.057630662 | 0 | 0            | -0.017587275 | 0            |
| 0 | -0.013690207 | 0 | -0.036661438 | 0 | -0.02120534  | 0            | -0.031692696 |
| 0 | 0.3584271    | 0 | -0.050242713 | 0 | 0            | -0.030319164 | 0            |
| 0 | 0.35961506   | 0 | -0.022545702 | 0 | -0.018290057 | 0            | 0            |
| 0 | 0.3578058    | 0 | -0.049939905 | 0 | 0.000259027  | 0            | -0.028554176 |
| 0 | 0.35464099   | 0 | -0.043913079 | 0 | -0.010995998 | 0            | -0.021511046 |
| 0 | 0.35612501   | 0 | -0.058828207 | 0 | 0            | -0.023531582 | 0            |
| 0 | 0.083395377  | 0 | 0            | 0 | -0.067678318 | 0            | -0.016033696 |
| 0 | 0.36407875   | 0 | 0            | 0 | -0.056583932 | 0            | -0.016944292 |
| 0 | 0.05460439   | 0 | -0.057401661 | 0 | 0.002861395  | 0            | -0.019060838 |
| 0 | 0            | 0 | 0            | 0 | -0.060135069 | 0            | -0.022441572 |
| 0 | 0.35899253   | 0 | 0            | 0 | -0.049248147 | 0            | -0.029550223 |
| 0 | 0.35654232   | 0 | 0            | 0 | -0.05860138  | 0            | -0.022801301 |
| 0 | 0.069809841  | 0 | -0.05341779  | 0 | -0.007192293 | 0            | 0            |
| 0 | 0.085294285  | 0 | -0.047564546 | 0 | -0.020602333 | 0            | 0            |
| 0 | 0            | 0 | -0.068739173 | 0 | 0            | -0.016966887 | 0            |
| 0 | 0.37037172   | 0 | -0.044069435 | 0 | -0.014474073 | 0            | 0            |
| 0 | 0            | 0 | -0.057260009 | 0 | 0.001728505  | 0            | -0.019620479 |
| 0 | 0.35312105   | 0 | -0.029076176 | 0 | -0.023823587 | 0            | 0            |
| 0 | 0.38687054   | 0 | -0.067728715 | 0 | 0            | -0.016560503 | 0            |
| 0 | 0            | 0 | 0            | 0 | -0.068269452 | 0            | -0.016297299 |
| 0 | 0            | 0 | -0.053185523 | 0 | -0.008007072 | 0            | 0            |
| 0 | 0.072068775  | 0 | -0.044022736 | 0 | -0.014947946 | 0            | -0.023340228 |
| 0 | 0.38651122   | 0 | 0            | 0 | -0.066787777 | 0            | -0.015898748 |
| 0 | 0            | 0 | -0.047333845 | 0 | -0.02140605  | 0            | 0            |
| 0 | 0.054088151  | 0 | -0.049355023 | 0 | -0.000520383 | 0            | -0.030000437 |
| 0 | 0.39078463   | 0 | -0.052171956 | 0 | -0.015273581 | 0            | 0            |
| 0 | 0            | 0 | -0.046911511 | 0 | -0.011082833 | 0            | -0.0180909   |
| 0 | 0.35297223   | 0 | -0.037322663 | 0 | -0.017564698 | 0            | 0            |
| 0 | 0            | 0 | -0.049493831 | 0 | -0.001331317 | 0            | -0.030072817 |
| 0 | -0.014551542 | 0 | -0.046742512 | 0 | -0.010920903 | 0            | -0.017503297 |
| 0 | 0            | 0 | -0.044252638 | 0 | -0.015793178 | 0            | -0.023240163 |

|   |              |   |              |   |              |   |              |   |
|---|--------------|---|--------------|---|--------------|---|--------------|---|
| 0 | 0.078266483  | 0 | -0.054984458 | 0 | -0.012243757 | 0 | -0.016681988 | 0 |
| 0 | 0.35744341   | 0 | -0.04837909  | 0 | -0.009486224 | 0 | -0.023494243 | 0 |
| 0 | 0.35442194   | 0 | -0.040965968 | 0 | -0.005491789 | 0 | 0            | 0 |
| 0 | 0            | 0 | -0.056284203 | 0 | -0.012617553 | 0 | -0.026214183 | 0 |
| 0 | 0            | 0 | -0.054779364 | 0 | -0.013075258 | 0 | -0.016940266 | 0 |
| 0 | 0.37551458   | 0 | -0.021932734 | 0 | -0.042711694 | 0 | -0.057150079 | 0 |
| 0 | 0.35244273   | 0 | -0.054020009 | 0 | -0.004385157 | 0 | -0.006219665 | 0 |
| 0 | 0.3518063    | 0 | -0.057970386 | 0 | 0            | 0 | -0.006585507 | 0 |
| 0 | 0.35013816   | 0 | -0.053424507 | 0 | -0.004404436 | 0 | -0.006086013 | 0 |
| 0 | 0.35437717   | 0 | -0.052474442 | 0 | -0.005667868 | 0 | 0            | 0 |
| 0 | 0.35116357   | 0 | 0            | 0 | -0.056597886 | 0 | -0.005935962 | 0 |
| 0 | 0.38613797   | 0 | 0            | 0 | 0            | 0 | -0.021219055 | 0 |
| 0 | 0.061458384  | 0 | -0.053617276 | 0 | -0.003591681 | 0 | -0.006817607 | 0 |
| 0 | 0.37829402   | 0 | 0            | 0 | 0            | 0 | -0.023405585 | 0 |
| 0 | 0            | 0 | -0.048757023 | 0 | -0.031906642 | 0 | -0.019348437 | 0 |
| 0 | 0            | 0 | -0.053410878 | 0 | -0.00462398  | 0 | -0.007241001 | 0 |
| 0 | 0.37225768   | 0 | 0            | 0 | 0            | 0 | -0.013172492 | 0 |
| 0 | 0.37725729   | 0 | -0.07494708  | 0 | 0            | 0 | -0.015316407 | 0 |
| 0 | 0.3865184    | 0 | -0.050954127 | 0 | -0.030934864 | 0 | -0.016920866 | 0 |
| 0 | 0.37703765   | 0 | 0            | 0 | -0.074628228 | 0 | -0.014588523 | 0 |
| 0 | 0.36001238   | 0 | -0.047496888 | 0 | -0.022085471 | 0 | -0.019250925 | 0 |
| 0 | 0.3806424    | 0 | -0.048751744 | 0 | -0.026674892 | 0 | 0            | 0 |
| 0 | 0            | 0 | -0.051118588 | 0 | -0.024477319 | 0 | -0.015559266 | 0 |
| 0 | -0.026732227 | 0 | -0.05096609  | 0 | -0.024355329 | 0 | -0.014916454 | 0 |
| 0 | 0.35711088   | 0 | -0.040909747 | 0 | -0.04731825  | 0 | -0.005295026 | 0 |
| 0 | 0.36123119   | 0 | -0.040797371 | 0 | -0.048279329 | 0 | 0            | 0 |
| 0 | 0.35967429   | 0 | 0            | 0 | -0.088265692 | 0 | -0.004064077 | 0 |
| 0 | 0.3592658    | 0 | -0.087402654 | 0 | 0            | 0 | -0.004622953 | 0 |
| 0 | 0            | 0 | -0.041311345 | 0 | -0.047556761 | 0 | -0.004988341 | 0 |
| 0 | 0.34267624   | 0 | -0.044260868 | 0 | -0.036157716 | 0 | 5.85E-05     | 0 |
| 0 | -0.015412073 | 0 | -0.041126627 | 0 | -0.047484713 | 0 | -0.004420387 | 0 |
| 0 | 0.36061479   | 0 | -0.046290648 | 0 | -0.04152763  | 0 | -0.004410674 | 0 |
| 0 | 0.48907953   | 0 | -0.026920925 | 0 | 0            | 0 | -0.053071889 | 0 |
| 0 | 0.48877488   | 0 | -0.02898925  | 0 | 0            | 0 | -0.052676437 | 0 |
| 0 | 0.48879273   | 0 | 0            | 0 | -0.028572125 | 0 | -0.052468737 | 0 |
| 0 | 0.4892035    | 0 | 0            | 0 | -0.025934707 | 0 | -0.052919957 | 0 |
| 0 | 0.49091176   | 0 | -0.027276203 | 0 | 0            | 0 | -0.053659232 | 0 |
| 0 | 0.49088585   | 0 | -0.024602982 | 0 | -0.003110727 | 0 | -0.053267988 | 0 |
| 0 | 0.49098184   | 0 | 0            | 0 | -0.026538032 | 0 | -0.053464001 | 0 |
| 0 | 0.48850899   | 0 | 0            | 0 | 0            | 0 | -0.055317851 | 0 |
| 0 | 0.48845914   | 0 | 0            | 0 | 0            | 0 | -0.053542727 | 0 |
| 0 | 0.49039397   | 0 | 0            | 0 | 0            | 0 | -0.054425343 | 0 |
| 0 | 0            | 0 | -0.027995183 | 0 | 0            | 0 | -0.051496638 | 0 |
| 0 | 0            | 0 | 0            | 0 | -0.026968412 | 0 | -0.051273829 | 0 |
| 0 | 0            | 0 | -0.028987278 | 0 | 0            | 0 | -0.05404345  | 0 |
| 0 | 0            | 0 | 0            | 0 | -0.028399303 | 0 | -0.05382813  | 0 |
| 0 | 0            | 0 | -0.028578386 | 0 | 0            | 0 | -0.05228896  | 0 |

|   |              |   |              |   |              |   |              |   |
|---|--------------|---|--------------|---|--------------|---|--------------|---|
| 0 | 0            | 0 | 0            | 0 | -0.027860858 | 0 | -0.052104631 | 0 |
| 0 | -0.013160011 | 0 | -0.02838205  | 0 | 0            | 0 | -0.051227861 | 0 |
| 0 | -0.013604291 | 0 | 0            | 0 | -0.027592764 | 0 | -0.051047104 | 0 |
| 0 | 0            | 0 | -0.027613865 | 0 | -0.000535224 | 0 | -0.049883186 | 0 |
| 0 | -0.040609793 | 0 | -0.028948293 | 0 | 0            | 0 | -0.053030686 | 0 |
| 0 | -0.040551671 | 0 | 0            | 0 | -0.02836646  | 0 | -0.052815473 | 0 |
| 0 | 0            | 0 | -0.026897554 | 0 | 0            | 0 | -0.053203615 | 0 |
| 0 | 0.48462478   | 0 | -0.044445457 | 0 | 0            | 0 | -0.05031486  | 0 |
| 0 | 0            | 0 | -0.027995958 | 0 | 0.000959205  | 0 | -0.052956067 | 0 |
| 0 | 0            | 0 | -0.022748033 | 0 | -0.006805597 | 0 | -0.052470277 | 0 |
| 0 | 0.48472375   | 0 | 0            | 0 | -0.044230653 | 0 | -0.049991225 | 0 |
| 0 | 0            | 0 | 0            | 0 | -0.02587864  | 0 | -0.053032788 | 0 |
| 0 | 0            | 0 | 0            | 0 | 0            | 0 | -0.05484548  | 0 |
| 0 | -0.018260826 | 0 | -0.026645794 | 0 | 0            | 0 | -0.052126504 | 0 |
| 0 | -0.017903047 | 0 | -0.028794083 | 0 | 0.002089693  | 0 | -0.051921837 | 0 |
| 0 | -0.010283478 | 0 | 0            | 0 | 0            | 0 | -0.053802551 | 0 |
| 0 | 0.48503446   | 0 | -0.047366721 | 0 | 0            | 0 | -0.053609101 | 0 |
| 0 | 0.48507116   | 0 | 0            | 0 | -0.047416173 | 0 | -0.053205499 | 0 |
| 0 | -0.018676512 | 0 | 0            | 0 | -0.025547008 | 0 | -0.051960427 | 0 |
| 0 | 0            | 0 | -0.030467081 | 0 | 0.004513735  | 0 | -0.050294298 | 0 |
| 0 | 0            | 0 | -0.025367997 | 0 | -0.002197946 | 0 | -0.053513832 | 0 |
| 0 | -0.044280045 | 0 | -0.022588071 | 0 | -0.006939237 | 0 | -0.051397428 | 0 |
| 0 | 0.013628069  | 0 | -0.039048234 | 0 | 0            | 0 | -0.052130668 | 0 |
| 0 | 0            | 0 | -0.040132014 | 0 | 0            | 0 | -0.053052224 | 0 |
| 0 | 0            | 0 | -0.030900382 | 0 | -0.010517903 | 0 | -0.053636462 | 0 |
| 0 | 0.013049458  | 0 | 0            | 0 | -0.038460106 | 0 | -0.051840185 | 0 |
| 0 | 0            | 0 | 0            | 0 | -0.039628032 | 0 | -0.052750694 | 0 |
| 0 | 0.48384836   | 0 | 0            | 0 | 0            | 0 | -0.05468745  | 0 |
| 0 | -0.048422798 | 0 | -0.02528343  | 0 | -0.002181047 | 0 | -0.052450623 | 0 |
| 0 | 0            | 0 | -0.023608884 | 0 | -0.005070876 | 0 | -0.043736177 | 0 |
| 0 | 0.48397042   | 0 | -0.031001375 | 0 | 0            | 0 | 0            | 0 |
| 0 | 0.48404079   | 0 | 0            | 0 | -0.030852319 | 0 | 0            | 0 |
| 0 | 0.48439034   | 0 | -0.031544154 | 0 | 0            | 0 | 0            | 0 |
| 0 | 0.020344408  | 0 | -0.030062944 | 0 | -0.013968486 | 0 | -0.04921568  | 0 |
| 0 | 0.48441502   | 0 | 0            | 0 | -0.031585619 | 0 | 0            | 0 |
| 0 | 0            | 0 | -0.029648718 | 0 | -0.015628014 | 0 | -0.050047927 | 0 |
| 0 | 0.48591291   | 0 | -0.017561631 | 0 | -0.014843142 | 0 | 0            | 0 |
| 0 | 0.48644626   | 0 | -0.029487174 | 0 | 0            | 0 | 0            | 0 |
| 0 | 0.48646776   | 0 | -0.023044944 | 0 | -0.006675808 | 0 | 0            | 0 |
| 0 | 0            | 0 | -0.026116321 | 0 | -0.02230349  | 0 | -0.053271386 | 0 |
| 0 | 0.48655892   | 0 | 0            | 0 | -0.029088022 | 0 | 0            | 0 |
| 0 | -0.029644246 | 0 | -0.025987099 | 0 | -0.022037579 | 0 | -0.052296677 | 0 |
| 0 | 0.48433214   | 0 | 0            | 0 | 0            | 0 | 0            | 0 |
| 0 | 0.4882871    | 0 | -0.019779227 | 0 | -0.010871775 | 0 | 0            | 0 |
| 0 | 0.48890378   | 0 | -0.022159996 | 0 | -0.03532209  | 0 | -0.049455737 | 0 |
| 0 | 0.48004427   | 0 | -0.04230829  | 0 | 0            | 0 | 0            | 0 |
| 0 | 0.48015852   | 0 | 0            | 0 | -0.042331158 | 0 | 0            | 0 |

|   |              |   |              |   |              |   |              |   |
|---|--------------|---|--------------|---|--------------|---|--------------|---|
| 0 | 0.49085618   | 0 | -0.039340759 | 0 | -0.013584075 | 0 | -0.050767176 | 0 |
| 0 | 0.49080423   | 0 | -0.052391213 | 0 | 0            | 0 | -0.050636971 | 0 |
| 0 | 0.006625376  | 0 | -0.030888926 | 0 | 0            | 0 | 0            | 0 |
| 0 | 0            | 0 | -0.02240208  | 0 | -0.009124582 | 0 | 0            | 0 |
| 0 | 0            | 0 | -0.03113382  | 0 | 0            | 0 | 0            | 0 |
| 0 | 0.006005737  | 0 | 0            | 0 | -0.03056283  | 0 | 0            | 0 |
| 0 | 0            | 0 | 0            | 0 | -0.030889025 | 0 | 0            | 0 |
| 0 | 0.49098678   | 0 | 0            | 0 | -0.051939156 | 0 | -0.050223031 | 0 |
| 0 | 0.004985547  | 0 | -0.021846062 | 0 | -0.00959912  | 0 | 0            | 0 |
| 0 | 0            | 0 | -0.021088168 | 0 | -0.01065117  | 0 | 0            | 0 |
| 0 | 0.48200453   | 0 | -0.024506741 | 0 | -0.02240988  | 0 | 0            | 0 |
| 0 | 0            | 0 | -0.019018265 | 0 | -0.01341356  | 0 | 0            | 0 |
| 0 | -0.023276542 | 0 | -0.018827953 | 0 | -0.013487066 | 0 | 0            | 0 |
| 0 | 0            | 0 | -0.022979921 | 0 | -0.007027616 | 0 | 0            | 0 |
| 0 | 0.00016692   | 0 | -0.02379808  | 0 | -0.005850837 | 0 | 0            | 0 |
| 0 | 0.48260938   | 0 | -0.020440455 | 0 | -0.030594228 | 0 | 0            | 0 |
| 0 | 0.030440179  | 0 | -0.026148355 | 0 | -0.015909655 | 0 | 0            | 0 |
| 0 | 0            | 0 | -0.025690806 | 0 | -0.01752145  | 0 | 0            | 0 |
| 0 | 0.034202945  | 0 | -0.039257452 | 0 | -0.012620544 | 0 | -0.049538207 | 0 |
| 0 | 0            | 0 | -0.03902472  | 0 | -0.014213394 | 0 | -0.050369042 | 0 |
| 0 | 0.37317841   | 0 | 0            | 0 | 0            | 0 | -0.061211117 | 0 |
| 0 | 0.48828658   | 0 | -0.03314427  | 0 | -0.021912165 | 0 | 0            | 0 |
| 0 | 0.37107879   | 0 | -0.014365328 | 0 | 0            | 0 | -0.06115449  | 0 |
| 0 | 0.3712856    | 0 | 0            | 0 | -0.013875502 | 0 | -0.061048167 | 0 |
| 0 | 0.37108601   | 0 | -0.013951361 | 0 | 0            | 0 | -0.059365039 | 0 |
| 0 | 0.37133637   | 0 | 0            | 0 | -0.013326129 | 0 | -0.059277275 | 0 |
| 0 | 0.37283972   | 0 | -0.012718596 | 0 | -0.001929689 | 0 | -0.059607796 | 0 |
| 0 | 0.3724073    | 0 | -0.018370726 | 0 | 0.006807549  | 0 | -0.06034372  | 0 |
| 0 | 0.37234653   | 0 | -0.011849914 | 0 | 0            | 0 | -0.060355573 | 0 |
| 0 | 0.37266844   | 0 | 0            | 0 | -0.010908423 | 0 | -0.060291081 | 0 |
| 0 | 0            | 0 | -0.014525    | 0 | 0            | 0 | -0.060461061 | 0 |
| 0 | 0            | 0 | 0            | 0 | -0.013754313 | 0 | -0.060367332 | 0 |
| 0 | -0.011000616 | 0 | -0.014407109 | 0 | 0            | 0 | -0.059642451 | 0 |
| 0 | -0.011202054 | 0 | 0            | 0 | -0.013580997 | 0 | -0.059550631 | 0 |
| 0 | 0            | 0 | -0.01953135  | 0 | 0.005621749  | 0 | -0.058610479 | 0 |
| 0 | 0.37400616   | 0 | -0.015349737 | 0 | 0.00312329   | 0 | -0.060733956 | 0 |
| 0 | 0            | 0 | -0.015154287 | 0 | 8.61E-05     | 0 | -0.060802735 | 0 |
| 0 | 0.36634706   | 0 | -0.025873795 | 0 | 0            | 0 | -0.060156104 | 0 |
| 0 | 0.36661995   | 0 | 0            | 0 | -0.025474826 | 0 | -0.059957326 | 0 |
| 0 | 0            | 0 | -0.016582193 | 0 | 0.002033519  | 0 | -0.059012498 | 0 |
| 0 | -0.012327538 | 0 | -0.017143152 | 0 | 0.002746162  | 0 | -0.058179165 | 0 |
| 0 | -0.038963871 | 0 | -0.015129964 | 0 | 1.35E-05     | 0 | -0.059968611 | 0 |
| 0 | 0            | 0 | -0.018986019 | 0 | 0.006796432  | 0 | -0.060061921 | 0 |
| 0 | -0.018186694 | 0 | -0.019598767 | 0 | 0.007604333  | 0 | -0.059212546 | 0 |
| 0 | 0.50108696   | 0 | -0.032125861 | 0 | -0.045204146 | 0 | -0.049742772 | 0 |
| 0 | 0.015625554  | 0 | -0.022166227 | 0 | -0.003669203 | 0 | -0.059083256 | 0 |
| 0 | 0            | 0 | -0.021875116 | 0 | -0.004838019 | 0 | -0.059765733 | 0 |

|   |              |   |              |   |              |   |              |   |
|---|--------------|---|--------------|---|--------------|---|--------------|---|
| 0 | 0.36794763   | 0 | -0.019777031 | 0 | -0.011109104 | 0 | -0.057148266 | 0 |
| 0 | 0.36834372   | 0 | -0.016129953 | 0 | -0.017937639 | 0 | -0.060464538 | 0 |
| 0 | 0.35924225   | 0 | -0.015986382 | 0 | 0            | 0 | 0            | 0 |
| 0 | 0.35939122   | 0 | 0            | 0 | -0.015917858 | 0 | 0            | 0 |
| 0 | 0.3605078    | 0 | -0.00980738  | 0 | -0.006569111 | 0 | 0            | 0 |
| 0 | 0.064239696  | 0 | -0.057714647 | 0 | 0            | 0 | -0.030068682 | 0 |
| 0 | 0.36079913   | 0 | -0.007583262 | 0 | -0.009472982 | 0 | 0            | 0 |
| 0 | 0.063822176  | 0 | 0            | 0 | -0.056735809 | 0 | -0.029488118 | 0 |
| 0 | 0            | 0 | -0.05829101  | 0 | 0            | 0 | -0.03044069  | 0 |
| 0 | 0.4093258    | 0 | -0.057965952 | 0 | 0            | 0 | 0            | 0 |
| 0 | 0.40891308   | 0 | 0            | 0 | -0.057402951 | 0 | 0            | 0 |
| 0 | 0            | 0 | 0            | 0 | -0.057356805 | 0 | -0.029854552 | 0 |
| 0 | 0.36198943   | 0 | -0.011654712 | 0 | -0.00253612  | 0 | 0            | 0 |
| 0 | 0.009958617  | 0 | -0.011950088 | 0 | -0.004776042 | 0 | 0            | 0 |
| 0 | 0            | 0 | -0.011448458 | 0 | -0.00548547  | 0 | 0            | 0 |
| 0 | 0.35618577   | 0 | -0.014504152 | 0 | -0.013706376 | 0 | 0            | 0 |
| 0 | 0.068945535  | 0 | -0.044736731 | 0 | -0.012885088 | 0 | 0            | 0 |
| 0 | 0.35649503   | 0 | -0.044271987 | 0 | 0            | 0 | -0.038957676 | 0 |
| 0 | 0.36945726   | 0 | -0.029502506 | 0 | -0.009769181 | 0 | -0.057680681 | 0 |
| 0 | 0.35691789   | 0 | 0            | 0 | -0.043612958 | 0 | -0.038373171 | 0 |
| 0 | 0            | 0 | -0.044505411 | 0 | -0.013721008 | 0 | 0            | 0 |
| 0 | 0            | 0 | -0.048353232 | 0 | -0.017273167 | 0 | -0.03344951  | 0 |
| 0 | 0.048994736  | 0 | -0.039932666 | 0 | -0.004152441 | 0 | -0.03859475  | 0 |
| 0 | 0            | 0 | -0.040039703 | 0 | -0.004978564 | 0 | -0.038697481 | 0 |
| 0 | 0.36679047   | 0 | -0.047081336 | 0 | 0            | 0 | -0.018675559 | 0 |
| 0 | 0.39552797   | 0 | 0            | 0 | 0            | 0 | -0.028943741 | 0 |
| 0 | 0.36625617   | 0 | 0            | 0 | -0.045219793 | 0 | -0.018170412 | 0 |
| 0 | 0.35325588   | 0 | -0.048571967 | 0 | 0.005798016  | 0 | -0.024243619 | 0 |
| 0 | 0.37304257   | 0 | -0.049765308 | 0 | 0.002329051  | 0 | 0            | 0 |
| 0 | 0.35167338   | 0 | -0.03051193  | 0 | -0.009818198 | 0 | 0            | 0 |
| 0 | 0.39131011   | 0 | -0.068422226 | 0 | 0            | 0 | -0.025524913 | 0 |
| 0 | 0.39121766   | 0 | 0            | 0 | -0.068386526 | 0 | -0.024914144 | 0 |
| 0 | 0.041193649  | 0 | -0.053134954 | 0 | 0.00723652   | 0 | -0.018864002 | 0 |
| 0 | 0            | 0 | -0.052920695 | 0 | 0.006189551  | 0 | -0.019396426 | 0 |
| 0 | 0.39606721   | 0 | -0.039419306 | 0 | -0.029413484 | 0 | 0            | 0 |
| 0 | 0.3960228    | 0 | -0.061946774 | 0 | 0            | 0 | -0.022737162 | 0 |
| 0 | 0.35727998   | 0 | -0.036548815 | 0 | -0.021138067 | 0 | -0.032428834 | 0 |
| 0 | 0            | 0 | -0.043134842 | 0 | -0.026026512 | 0 | -0.025719139 | 0 |
| 0 | 0.39549246   | 0 | 0            | 0 | -0.060558046 | 0 | -0.022051643 | 0 |
| 0 | -0.010239875 | 0 | -0.042940832 | 0 | -0.025930141 | 0 | -0.025129095 | 0 |
| 0 | 0.38581566   | 0 | -0.069238114 | 0 | 0            | 0 | -0.016485474 | 0 |
| 0 | 0.37969209   | 0 | -0.057570337 | 0 | 0.002147301  | 0 | -0.01895651  | 0 |
| 0 | 0.38550841   | 0 | 0            | 0 | -0.068771631 | 0 | -0.015824698 | 0 |
| 0 | 0.40010446   | 0 | -0.053598218 | 0 | -0.008041149 | 0 | 0            | 0 |
| 0 | 0.066112984  | 0 | -0.057590539 | 0 | -0.003552656 | 0 | -0.022727774 | 0 |
| 0 | 0.38972654   | 0 | -0.047716536 | 0 | -0.021565942 | 0 | 0            | 0 |
| 0 | 0            | 0 | -0.057405202 | 0 | -0.004334679 | 0 | -0.023080663 | 0 |

|   |              |   |              |   |              |   |              |   |
|---|--------------|---|--------------|---|--------------|---|--------------|---|
| 0 | 0.083587547  | 0 | -0.050469387 | 0 | -0.018629287 | 0 | -0.016557647 | 0 |
| 0 | 0.36459815   | 0 | -0.047269165 | 0 | -0.010802018 | 0 | -0.017454799 | 0 |
| 0 | 0.35842139   | 0 | -0.049132502 | 0 | -0.001166669 | 0 | -0.03030989  | 0 |
| 0 | 0.35604923   | 0 | -0.04387055  | 0 | -0.015662304 | 0 | -0.023464861 | 0 |
| 0 | 0            | 0 | -0.050290788 | 0 | -0.019397668 | 0 | -0.016816017 | 0 |
| 0 | 0.38696256   | 0 | -0.055068011 | 0 | -0.01330316  | 0 | -0.016468672 | 0 |
| 0 | 0.35177591   | 0 | -0.053773135 | 0 | -0.004392872 | 0 | -0.006537925 | 0 |
| 0 | 0.37744769   | 0 | -0.051391071 | 0 | -0.024732052 | 0 | -0.015128162 | 0 |
| 0 | 0.35993301   | 0 | -0.041497531 | 0 | -0.048013837 | 0 | -0.004442876 | 0 |
| 0 | 0.48681323   | 0 | -0.028781426 | 0 | 0            | 0 | -0.054155334 | 0 |
| 0 | 0.48686348   | 0 | 0            | 0 | -0.028190827 | 0 | -0.053941694 | 0 |
| 0 | 0.48684993   | 0 | -0.028379391 | 0 | 0            | 0 | -0.052428841 | 0 |
| 0 | 0.4869351    | 0 | 0            | 0 | -0.027661864 | 0 | -0.052246008 | 0 |
| 0 | 0.48912027   | 0 | -0.026730876 | 0 | 0            | 0 | -0.053330837 | 0 |
| 0 | 0.48977995   | 0 | -0.02783436  | 0 | 0.000955321  | 0 | -0.053055821 | 0 |
| 0 | 0.48875338   | 0 | -0.022679201 | 0 | -0.006654095 | 0 | -0.05261049  | 0 |
| 0 | 0.48924122   | 0 | 0            | 0 | -0.025717375 | 0 | -0.053161114 | 0 |
| 0 | 0.48674888   | 0 | 0            | 0 | 0            | 0 | -0.054954641 | 0 |
| 0 | 0.49090871   | 0 | -0.025250499 | 0 | -0.00213544  | 0 | -0.053636519 | 0 |
| 0 | 0.48244404   | 0 | -0.040019286 | 0 | 0            | 0 | -0.053164053 | 0 |
| 0 | 0.48255309   | 0 | 0            | 0 | -0.039519526 | 0 | -0.052863298 | 0 |
| 0 | 0            | 0 | -0.028430371 | 0 | 0            | 0 | -0.053714942 | 0 |
| 0 | 0            | 0 | 0            | 0 | -0.027571715 | 0 | -0.053524769 | 0 |
| 0 | -0.011830026 | 0 | -0.028231638 | 0 | 0            | 0 | -0.052678097 | 0 |
| 0 | 0            | 0 | -0.028944344 | 0 | 0.001005121  | 0 | -0.051509654 | 0 |
| 0 | -0.012273669 | 0 | 0            | 0 | -0.027300507 | 0 | -0.052492507 | 0 |
| 0 | 0            | 0 | -0.024724246 | 0 | -0.004506467 | 0 | -0.0540004   | 0 |
| 0 | 0            | 0 | -0.025927264 | 0 | -0.002795237 | 0 | -0.052244879 | 0 |
| 0 | -0.013195131 | 0 | -0.026743882 | 0 | -0.001728577 | 0 | -0.051210979 | 0 |
| 0 | -0.040606611 | 0 | -0.024553587 | 0 | -0.00463477  | 0 | -0.052985588 | 0 |
| 0 | 0.48462162   | 0 | -0.02953152  | 0 | -0.015599081 | 0 | -0.050180698 | 0 |
| 0 | 0            | 0 | -0.028421192 | 0 | 0.001607396  | 0 | -0.053220205 | 0 |
| 0 | -0.018200373 | 0 | -0.02916397  | 0 | 0.002655943  | 0 | -0.052154111 | 0 |
| 0 | 0.48504214   | 0 | -0.025986731 | 0 | -0.022272539 | 0 | -0.053378275 | 0 |
| 0 | 0.013336985  | 0 | -0.031621721 | 0 | -0.00778478  | 0 | -0.052065027 | 0 |
| 0 | 0            | 0 | -0.031192091 | 0 | -0.00937005  | 0 | -0.052960091 | 0 |
| 0 | 0.48264844   | 0 | -0.03094437  | 0 | 0            | 0 | 0            | 0 |
| 0 | 0.48273999   | 0 | 0            | 0 | -0.030703316 | 0 | 0            | 0 |
| 0 | 0.48396248   | 0 | -0.020957954 | 0 | -0.010591609 | 0 | 0            | 0 |
| 0 | 0.48435885   | 0 | -0.018908635 | 0 | -0.013317808 | 0 | 0            | 0 |
| 0 | 0.48645238   | 0 | -0.022801375 | 0 | -0.007047623 | 0 | 0            | 0 |
| 0 | 0.48006424   | 0 | -0.025554481 | 0 | -0.017551454 | 0 | 0            | 0 |
| 0 | 0.49060439   | 0 | -0.038608532 | 0 | -0.014423805 | 0 | -0.05050742  | 0 |
| 0 | 0.00641901   | 0 | -0.022918582 | 0 | -0.008405575 | 0 | 0            | 0 |
| 0 | 0            | 0 | -0.022148604 | 0 | -0.009475943 | 0 | 0            | 0 |
| 0 | 0.36956197   | 0 | -0.013827111 | 0 | 0            | 0 | -0.060816086 | 0 |
| 0 | 0.3698546    | 0 | 0            | 0 | -0.013059238 | 0 | -0.060728527 | 0 |



|   |              |   |              |   |              |   |              |   |
|---|--------------|---|--------------|---|--------------|---|--------------|---|
| 0 | 0.37108195   | 0 | -0.014706053 | 0 | 0.000359071  | 0 | -0.061158144 | 0 |
| 0 | 0.37104121   | 0 | -0.016178218 | 0 | 0.002345109  | 0 | -0.059387081 | 0 |
| 0 | 0.37238693   | 0 | -0.018493535 | 0 | 0.007001565  | 0 | -0.060425434 | 0 |
| 0 | 0            | 0 | -0.018194886 | 0 | 0.003869502  | 0 | -0.060499019 | 0 |
| 0 | -0.010904378 | 0 | -0.018765539 | 0 | 0.004595733  | 0 | -0.059687965 | 0 |
| 0 | 0.36631321   | 0 | -0.021419206 | 0 | -0.004668628 | 0 | -0.060115576 | 0 |
| 0 | 0.40453141   | 0 | -0.058712829 | 0 | 0            | 0 | -0.030082156 | 0 |
| 0 | 0.40414426   | 0 | 0            | 0 | -0.057775132 | 0 | -0.029489137 | 0 |
| 0 | 0.35921349   | 0 | -0.010863347 | 0 | -0.005399665 | 0 | 0            | 0 |
| 0 | 0.064023726  | 0 | -0.049701205 | 0 | -0.008439316 | 0 | -0.029993455 | 0 |
| 0 | 0            | 0 | -0.049601626 | 0 | -0.00915741  | 0 | -0.030361589 | 0 |
| 0 | 0.40935688   | 0 | -0.04487538  | 0 | -0.013790611 | 0 | 0            | 0 |
| 0 | 0.35647148   | 0 | -0.039693025 | 0 | -0.004809785 | 0 | -0.038922433 | 0 |
| 0 | 0.36685767   | 0 | -0.053295519 | 0 | 0.006517218  | 0 | -0.018759295 | 0 |
| 0 | 0.39150253   | 0 | -0.043374996 | 0 | -0.026297625 | 0 | -0.025328668 | 0 |
| 0 | 0.39599999   | 0 | -0.057798006 | 0 | -0.004370129 | 0 | -0.022694668 | 0 |
| 0 | 0.38593764   | 0 | -0.050603402 | 0 | -0.01959328  | 0 | -0.016349865 | 0 |
| 0 | 0.48516573   | 0 | -0.028233765 | 0 | 0            | 0 | -0.053831027 | 0 |
| 0 | 0.48527569   | 0 | 0            | 0 | -0.027378271 | 0 | -0.05364299  | 0 |
| 0 | 0.48680401   | 0 | -0.024533846 | 0 | -0.004478961 | 0 | -0.054108096 | 0 |
| 0 | 0.4868464    | 0 | -0.025930358 | 0 | -0.002584097 | 0 | -0.052403838 | 0 |
| 0 | 0.48876649   | 0 | -0.02832189  | 0 | 0.001662996  | 0 | -0.053337163 | 0 |
| 0 | 0.48245087   | 0 | -0.031067495 | 0 | -0.009382458 | 0 | -0.053071785 | 0 |
| 0 | 0            | 0 | -0.027586511 | 0 | -0.000889579 | 0 | -0.053705137 | 0 |
| 0 | -0.011828643 | 0 | -0.028292474 | 0 | 6.42E-05     | 0 | -0.052678749 | 0 |
| 0 | 0.48272216   | 0 | -0.022025681 | 0 | -0.009412371 | 0 | 0            | 0 |
| 0 | 0.36958859   | 0 | -0.017712103 | 0 | 0.004096446  | 0 | -0.060856482 | 0 |
| 0 | 0.40463596   | 0 | -0.049945879 | 0 | -0.00923681  | 0 | -0.030005858 | 0 |
| 0 | 0.48512328   | 0 | -0.027334591 | 0 | -0.000956061 | 0 | -0.05383419  | 0 |

SUPPLEMENTARY TABLE 8

| Model    | BIC     | Loglike  | H2r       | SE | bsnp_rs2938864 | SE | bsnp_rs1001646 |
|----------|---------|----------|-----------|----|----------------|----|----------------|
| cov0     | 0       | -456.076 | 0.3243586 | 0  | 0              | 0  | 0              |
| cov2     | 2.9129  | -454.036 | 0.3188279 | 0  | 0              | 0  | -0.087081061   |
| cov1     | 3.1144  | -454.136 | 0.3167291 | 0  | -0.086122222   | 0  | 0              |
| cov9     | 3.1553  | -454.157 | 0.3157377 | 0  | 0              | 0  | 0              |
| cov10    | 3.3367  | -454.247 | 0.316196  | 0  | 0              | 0  | 0              |
| cov5     | 5.7679  | -455.463 | 0.3198947 | 0  | 0              | 0  | 0              |
| cov6     | 5.7729  | -455.465 | 0.3204928 | 0  | 0              | 0  | 0              |
| cov4     | 5.7765  | -455.467 | 0.3202945 | 0  | 0              | 0  | 0              |
| cov11    | 6.2876  | -455.723 | 0.320818  | 0  | 0              | 0  | 0              |
| cov3     | 6.5757  | -455.867 | 0.32083   | 0  | 0              | 0  | 0              |
| cov7     | 6.6697  | -455.914 | 0.3251811 | 0  | 0              | 0  | 0              |
| cov8     | 6.6907  | -455.924 | 0.3251563 | 0  | 0              | 0  | 0              |
| cov1_6   | 7.2908  | -452.727 | 0.3170811 | 0  | -0.24852679    | 0  | 0              |
| cov2_9   | 8.2942  | -453.229 | 0.314586  | 0  | 0              | 0  | -0.063702362   |
| cov2_10  | 8.3701  | -453.267 | 0.3148669 | 0  | 0              | 0  | -0.065119828   |
| cov1_9   | 8.6306  | -453.397 | 0.3133292 | 0  | -0.059946857   | 0  | 0              |
| cov1_10  | 8.6753  | -453.419 | 0.3134984 | 0  | -0.061880565   | 0  | 0              |
| cov1_5   | 8.6903  | -453.427 | 0.3187116 | 0  | -0.17598819    | 0  | 0              |
| cov1_11  | 9.058   | -453.611 | 0.3189846 | 0  | -0.13905785    | 0  | 0              |
| cov2_4   | 9.161   | -453.662 | 0.321285  | 0  | 0              | 0  | -0.13709023    |
| cov2_6   | 9.2914  | -453.727 | 0.3205358 | 0  | 0              | 0  | -0.13024133    |
| cov2_11  | 9.3984  | -453.781 | 0.3213346 | 0  | 0              | 0  | -0.11536005    |
| cov5_9   | 9.501   | -453.832 | 0.3129676 | 0  | 0              | 0  | 0              |
| cov4_9   | 9.5181  | -453.841 | 0.3133677 | 0  | 0              | 0  | 0              |
| cov2_5   | 9.5468  | -453.855 | 0.3207968 | 0  | 0              | 0  | -0.1161315     |
| cov5_10  | 9.5905  | -453.877 | 0.3131332 | 0  | 0              | 0  | 0              |
| cov4_10  | 9.6354  | -453.899 | 0.313634  | 0  | 0              | 0  | 0              |
| cov1_2   | 9.6775  | -453.92  | 0.3174109 | 0  | -0.039803317   | 0  | -0.053712235   |
| cov2_7   | 9.6939  | -453.929 | 0.3197504 | 0  | 0              | 0  | -0.086009925   |
| cov2_8   | 9.7109  | -453.937 | 0.3197159 | 0  | 0              | 0  | -0.086053572   |
| cov2_3   | 9.7581  | -453.961 | 0.316749  | 0  | 0              | 0  | -0.084848427   |
| cov1_4   | 9.8511  | -454.007 | 0.3174435 | 0  | -0.11021433    | 0  | 0              |
| cov1_7   | 9.9321  | -454.048 | 0.3176415 | 0  | -0.084710644   | 0  | 0              |
| cov1_8   | 9.9471  | -454.055 | 0.3176034 | 0  | -0.084777236   | 0  | 0              |
| cov1_3   | 9.9534  | -454.058 | 0.3146698 | 0  | -0.083825252   | 0  | 0              |
| cov7_9   | 9.9956  | -454.079 | 0.3164128 | 0  | 0              | 0  | 0              |
| cov8_9   | 10.0124 | -454.088 | 0.3163792 | 0  | 0              | 0  | 0              |
| cov6_9   | 10.0926 | -454.128 | 0.3153725 | 0  | 0              | 0  | 0              |
| cov9_11  | 10.0939 | -454.129 | 0.3150932 | 0  | 0              | 0  | 0              |
| cov3_9   | 10.1166 | -454.14  | 0.3150056 | 0  | 0              | 0  | 0              |
| cov9_10  | 10.1499 | -454.157 | 0.3157412 | 0  | 0              | 0  | 0              |
| cov7_10  | 10.1759 | -454.17  | 0.3168774 | 0  | 0              | 0  | 0              |
| cov8_10  | 10.1927 | -454.178 | 0.3168438 | 0  | 0              | 0  | 0              |
| cov6_10  | 10.2391 | -454.201 | 0.3156901 | 0  | 0              | 0  | 0              |
| cov10_11 | 10.2453 | -454.204 | 0.3153606 | 0  | 0              | 0  | 0              |

|            |         |          |           |   |             |   |              |
|------------|---------|----------|-----------|---|-------------|---|--------------|
| cov3_10    | 10.3002 | -454.232 | 0.3154838 | 0 | 0           | 0 | 0            |
| cov3_7     | 11.7475 | -454.955 | 0.3171353 | 0 | 0           | 0 | 0            |
| cov3_8     | 11.8368 | -455     | 0.3172722 | 0 | 0           | 0 | 0            |
| cov3_4     | 12.071  | -455.117 | 0.3149523 | 0 | 0           | 0 | 0            |
| cov1_6_9   | 12.1111 | -451.64  | 0.3132449 | 0 | -0.23703244 | 0 | 0            |
| cov3_5     | 12.1758 | -455.169 | 0.3151119 | 0 | 0           | 0 | 0            |
| cov1_6_10  | 12.1836 | -451.676 | 0.3134456 | 0 | -0.23866236 | 0 | 0            |
| cov5_7     | 12.4767 | -455.32  | 0.3208801 | 0 | 0           | 0 | 0            |
| cov5_8     | 12.4955 | -455.329 | 0.3208477 | 0 | 0           | 0 | 0            |
| cov6_7     | 12.5059 | -455.335 | 0.3214357 | 0 | 0           | 0 | 0            |
| cov3_6     | 12.5114 | -455.337 | 0.3178802 | 0 | 0           | 0 | 0            |
| cov6_8     | 12.5286 | -455.346 | 0.3214017 | 0 | 0           | 0 | 0            |
| cov4_6     | 12.5394 | -455.351 | 0.3196503 | 0 | 0           | 0 | 0            |
| cov4_7     | 12.5812 | -455.372 | 0.3211936 | 0 | 0           | 0 | 0            |
| cov4_8     | 12.5963 | -455.38  | 0.3211573 | 0 | 0           | 0 | 0            |
| cov5_6     | 12.619  | -455.391 | 0.3196782 | 0 | 0           | 0 | 0            |
| cov4_5     | 12.6766 | -455.42  | 0.3197696 | 0 | 0           | 0 | 0            |
| cov4_11    | 12.6962 | -455.43  | 0.3195466 | 0 | 0           | 0 | 0            |
| cov5_11    | 12.7421 | -455.453 | 0.3195763 | 0 | 0           | 0 | 0            |
| cov6_11    | 12.7637 | -455.463 | 0.3203346 | 0 | 0           | 0 | 0            |
| cov7_11    | 12.8152 | -455.489 | 0.3215629 | 0 | 0           | 0 | 0            |
| cov1_5_6   | 12.8235 | -451.996 | 0.3191756 | 0 | -0.34086684 | 0 | 0            |
| cov8_11    | 12.842  | -455.503 | 0.3215462 | 0 | 0           | 0 | 0            |
| cov3_11    | 13.0646 | -455.614 | 0.3186464 | 0 | 0           | 0 | 0            |
| cov1_6_11  | 13.5278 | -452.348 | 0.3191083 | 0 | -0.28564342 | 0 | 0            |
| cov7_8     | 13.6261 | -455.895 | 0.3251571 | 0 | 0           | 0 | 0            |
| cov1_2_6   | 13.7179 | -452.443 | 0.3177341 | 0 | -0.19952258 | 0 | -0.061608068 |
| cov2_6_9   | 13.957  | -452.563 | 0.3163039 | 0 | 0           | 0 | -0.1235915   |
| cov1_3_6   | 14.0846 | -452.626 | 0.3147735 | 0 | -0.24720204 | 0 | 0            |
| cov1_4_6   | 14.0974 | -452.633 | 0.3178552 | 0 | -0.26724027 | 0 | 0            |
| cov2_6_10  | 14.1215 | -452.645 | 0.3166344 | 0 | 0           | 0 | -0.12329582  |
| cov1_6_7   | 14.1586 | -452.663 | 0.3178512 | 0 | -0.24602041 | 0 | 0            |
| cov1_6_8   | 14.1602 | -452.664 | 0.3178501 | 0 | -0.24637034 | 0 | 0            |
| cov2_9_11  | 14.6347 | -452.902 | 0.3171578 | 0 | 0           | 0 | -0.094691446 |
| cov1_5_11  | 14.6435 | -452.906 | 0.3207874 | 0 | -0.22836461 | 0 | 0            |
| cov1_9_11  | 14.665  | -452.917 | 0.3154805 | 0 | -0.11131252 | 0 | 0            |
| cov1_10_11 | 14.7265 | -452.947 | 0.3156601 | 0 | -0.11292473 | 0 | 0            |
| cov2_10_11 | 14.754  | -452.961 | 0.3174185 | 0 | 0           | 0 | -0.095339852 |
| cov2_4_9   | 15.0011 | -453.085 | 0.316783  | 0 | 0           | 0 | -0.098763163 |
| cov2_4_10  | 15.0819 | -453.125 | 0.3170565 | 0 | 0           | 0 | -0.10002022  |
| cov2_7_9   | 15.1549 | -453.162 | 0.3153349 | 0 | 0           | 0 | -0.063365865 |
| cov1_5_9   | 15.1629 | -453.166 | 0.3158811 | 0 | -0.12717809 | 0 | 0            |
| cov2_8_9   | 15.1698 | -453.169 | 0.315297  | 0 | 0           | 0 | -0.063397916 |
| cov2_5_9   | 15.1775 | -453.173 | 0.3160412 | 0 | 0           | 0 | -0.081583259 |
| cov1_2_5   | 15.1861 | -453.177 | 0.3196083 | 0 | -0.12834093 | 0 | -0.057783368 |
| cov1_5_10  | 15.2074 | -453.188 | 0.316052  | 0 | -0.12930882 | 0 | 0            |
| cov2_7_10  | 15.2308 | -453.2   | 0.3156219 | 0 | 0           | 0 | -0.064777541 |

|           |         |          |           |   |              |   |              |
|-----------|---------|----------|-----------|---|--------------|---|--------------|
| cov2_8_10 | 15.2457 | -453.207 | 0.3155826 | 0 | 0            | 0 | -0.0648085   |
| cov1_2_9  | 15.2483 | -453.208 | 0.3141267 | 0 | -0.01715626  | 0 | -0.050169841 |
| cov2_5_10 | 15.2692 | -453.219 | 0.316242  | 0 | 0            | 0 | -0.081894169 |
| cov2_3_9  | 15.273  | -453.221 | 0.3140345 | 0 | 0            | 0 | -0.063450502 |
| cov2_9_10 | 15.288  | -453.228 | 0.3145942 | 0 | 0            | 0 | -0.063721392 |
| cov1_2_10 | 15.3086 | -453.238 | 0.3143012 | 0 | -0.020075334 | 0 | -0.049146281 |
| cov2_3_10 | 15.3506 | -453.259 | 0.3143415 | 0 | 0            | 0 | -0.064885758 |
| cov1_2_11 | 15.5003 | -453.334 | 0.3199831 | 0 | -0.089629645 | 0 | -0.060962181 |
| cov1_7_9  | 15.5075 | -453.338 | 0.3140577 | 0 | -0.059268787 | 0 | 0            |
| cov1_8_9  | 15.5213 | -453.345 | 0.314017  | 0 | -0.059327938 | 0 | 0            |
| cov1_4_5  | 15.5401 | -453.354 | 0.3185405 | 0 | -0.17740162  | 0 | 0            |
| cov1_7_10 | 15.5536 | -453.361 | 0.3142302 | 0 | -0.061197544 | 0 | 0            |
| cov1_8_10 | 15.5672 | -453.368 | 0.3141891 | 0 | -0.061255885 | 0 | 0            |
| cov1_5_7  | 15.5686 | -453.368 | 0.3193623 | 0 | -0.17311269  | 0 | 0            |
| cov1_5_8  | 15.5814 | -453.375 | 0.3193261 | 0 | -0.17325666  | 0 | 0            |
| cov1_4_9  | 15.588  | -453.378 | 0.3137848 | 0 | -0.070592442 | 0 | 0            |
| cov1_3_9  | 15.6035 | -453.386 | 0.3126933 | 0 | -0.059736499 | 0 | 0            |
| cov1_9_10 | 15.6192 | -453.394 | 0.3133368 | 0 | -0.060140223 | 0 | 0            |
| cov1_4_10 | 15.6305 | -453.399 | 0.3139592 | 0 | -0.072759497 | 0 | 0            |
| cov1_3_10 | 15.6508 | -453.41  | 0.3128963 | 0 | -0.061676679 | 0 | 0            |
| cov1_3_5  | 15.6664 | -453.417 | 0.3195581 | 0 | -0.18188079  | 0 | 0            |
| cov1_3_11 | 15.6736 | -453.421 | 0.3159648 | 0 | -0.14194188  | 0 | 0            |
| cov2_4_11 | 15.681  | -453.425 | 0.3236458 | 0 | 0            | 0 | -0.16327774  |
| cov2_4_6  | 15.7055 | -453.437 | 0.3225655 | 0 | 0            | 0 | -0.16888148  |
| cov1_2_4  | 15.7506 | -453.459 | 0.3196784 | 0 | -0.053584352 | 0 | -0.098509928 |
| cov2_3_7  | 15.7645 | -453.466 | 0.3146113 | 0 | 0            | 0 | -0.076336318 |
| cov1_4_11 | 15.7803 | -453.474 | 0.3196897 | 0 | -0.16417789  | 0 | 0            |
| cov2_4_7  | 15.8117 | -453.49  | 0.3227277 | 0 | 0            | 0 | -0.14043543  |
| cov2_3_8  | 15.8263 | -453.497 | 0.3147141 | 0 | 0            | 0 | -0.076669768 |
| cov2_4_8  | 15.8355 | -453.502 | 0.3226783 | 0 | 0            | 0 | -0.14026014  |
| cov5_6_9  | 15.9902 | -453.579 | 0.3114521 | 0 | 0            | 0 | 0            |
| cov1_7_11 | 16.0358 | -453.602 | 0.319184  | 0 | -0.13657376  | 0 | 0            |
| cov1_8_11 | 16.04   | -453.604 | 0.3191591 | 0 | -0.13691037  | 0 | 0            |
| cov1_3_7  | 16.043  | -453.606 | 0.3129483 | 0 | -0.07420673  | 0 | 0            |
| cov2_6_7  | 16.0584 | -453.613 | 0.3214861 | 0 | 0            | 0 | -0.12963424  |
| cov2_6_8  | 16.0716 | -453.62  | 0.3214663 | 0 | 0            | 0 | -0.12980371  |
| cov1_3_8  | 16.101  | -453.635 | 0.3130343 | 0 | -0.074604914 | 0 | 0            |
| cov2_6_11 | 16.1045 | -453.636 | 0.3217587 | 0 | 0            | 0 | -0.13813564  |
| cov2_3_6  | 16.1061 | -453.637 | 0.3183126 | 0 | 0            | 0 | -0.12886969  |
| cov2_3_11 | 16.1074 | -453.638 | 0.3187693 | 0 | 0            | 0 | -0.11635409  |
| cov5_6_10 | 16.1075 | -453.638 | 0.311676  | 0 | 0            | 0 | 0            |
| cov2_4_5  | 16.1545 | -453.661 | 0.3213559 | 0 | 0            | 0 | -0.13758334  |
| cov2_3_4  | 16.1558 | -453.662 | 0.3213033 | 0 | 0            | 0 | -0.13717884  |
| cov2_5_6  | 16.2232 | -453.696 | 0.3211678 | 0 | 0            | 0 | -0.13646679  |
| cov2_5_11 | 16.2388 | -453.704 | 0.3222069 | 0 | 0            | 0 | -0.13016377  |
| cov2_7_11 | 16.2965 | -453.732 | 0.3216999 | 0 | 0            | 0 | -0.11180271  |
| cov2_8_11 | 16.3075 | -453.738 | 0.3216817 | 0 | 0            | 0 | -0.11203033  |

|            |         |          |           |   |              |   |              |
|------------|---------|----------|-----------|---|--------------|---|--------------|
| cov4_6_9   | 16.3274 | -453.748 | 0.3130266 | 0 | 0            | 0 | 0            |
| cov2_5_7   | 16.3341 | -453.751 | 0.321647  | 0 | 0            | 0 | -0.11482942  |
| cov5_9_11  | 16.3507 | -453.76  | 0.3132679 | 0 | 0            | 0 | 0            |
| cov2_5_8   | 16.3514 | -453.76  | 0.3216091 | 0 | 0            | 0 | -0.114858    |
| cov5_7_9   | 16.3526 | -453.76  | 0.3137217 | 0 | 0            | 0 | 0            |
| cov5_8_9   | 16.3682 | -453.768 | 0.3136825 | 0 | 0            | 0 | 0            |
| cov3_4_9   | 16.3852 | -453.777 | 0.311595  | 0 | 0            | 0 | 0            |
| cov3_5_9   | 16.4025 | -453.785 | 0.3114872 | 0 | 0            | 0 | 0            |
| cov4_7_9   | 16.4191 | -453.794 | 0.3140341 | 0 | 0            | 0 | 0            |
| cov4_8_9   | 16.4316 | -453.8   | 0.3139905 | 0 | 0            | 0 | 0            |
| cov5_7_10  | 16.4431 | -453.806 | 0.3138965 | 0 | 0            | 0 | 0            |
| cov5_10_11 | 16.4552 | -453.812 | 0.3134353 | 0 | 0            | 0 | 0            |
| cov4_5_9   | 16.4553 | -453.812 | 0.3129533 | 0 | 0            | 0 | 0            |
| cov5_8_10  | 16.4586 | -453.813 | 0.3138568 | 0 | 0            | 0 | 0            |
| cov4_9_11  | 16.4618 | -453.815 | 0.3136964 | 0 | 0            | 0 | 0            |
| cov4_6_10  | 16.4828 | -453.826 | 0.3133666 | 0 | 0            | 0 | 0            |
| cov1_2_7   | 16.4831 | -453.826 | 0.3183734 | 0 | -0.037684702 | 0 | -0.054477504 |
| cov5_9_10  | 16.4863 | -453.827 | 0.3129514 | 0 | 0            | 0 | 0            |
| cov3_5_10  | 16.4938 | -453.831 | 0.3116587 | 0 | 0            | 0 | 0            |
| cov2_3_5   | 16.4959 | -453.832 | 0.3193954 | 0 | 0            | 0 | -0.11151487  |
| cov1_2_8   | 16.4988 | -453.834 | 0.3183339 | 0 | -0.037794238 | 0 | -0.054429149 |
| cov3_4_10  | 16.503  | -453.836 | 0.3118497 | 0 | 0            | 0 | 0            |
| cov4_9_10  | 16.5088 | -453.839 | 0.3133685 | 0 | 0            | 0 | 0            |
| cov1_2_3   | 16.5356 | -453.852 | 0.3154574 | 0 | -0.038673191 | 0 | -0.052526174 |
| cov4_7_10  | 16.5388 | -453.854 | 0.3143005 | 0 | 0            | 0 | 0            |
| cov3_7_9   | 16.5503 | -453.859 | 0.3138278 | 0 | 0            | 0 | 0            |
| cov4_8_10  | 16.5511 | -453.86  | 0.3142564 | 0 | 0            | 0 | 0            |
| cov4_5_10  | 16.5512 | -453.86  | 0.313126  | 0 | 0            | 0 | 0            |
| cov4_10_11 | 16.5948 | -453.882 | 0.3139235 | 0 | 0            | 0 | 0            |
| cov3_8_9   | 16.602  | -453.885 | 0.3139095 | 0 | 0            | 0 | 0            |
| cov1_4_7   | 16.6203 | -453.894 | 0.3185559 | 0 | -0.1109186   | 0 | 0            |
| cov1_4_8   | 16.638  | -453.903 | 0.3185118 | 0 | -0.11086833  | 0 | 0            |
| cov2_7_8   | 16.6486 | -453.908 | 0.3197181 | 0 | 0            | 0 | -0.086026789 |
| cov3_7_10  | 16.7337 | -453.951 | 0.314279  | 0 | 0            | 0 | 0            |
| cov3_8_10  | 16.7854 | -453.977 | 0.3143621 | 0 | 0            | 0 | 0            |
| cov1_3_4   | 16.799  | -453.984 | 0.3161078 | 0 | -0.10458313  | 0 | 0            |
| cov1_7_8   | 16.8887 | -454.029 | 0.3176135 | 0 | -0.084705974 | 0 | 0            |
| cov7_9_11  | 16.8965 | -454.032 | 0.3156849 | 0 | 0            | 0 | 0            |
| cov8_9_11  | 16.9157 | -454.042 | 0.3156603 | 0 | 0            | 0 | 0            |
| cov7_8_9   | 16.932  | -454.05  | 0.3163555 | 0 | 0            | 0 | 0            |
| cov6_7_9   | 16.9354 | -454.052 | 0.3160724 | 0 | 0            | 0 | 0            |
| cov6_8_9   | 16.9526 | -454.061 | 0.3160374 | 0 | 0            | 0 | 0            |
| cov7_9_10  | 16.9903 | -454.079 | 0.3164144 | 0 | 0            | 0 | 0            |
| cov8_9_10  | 17.0071 | -454.088 | 0.3163811 | 0 | 0            | 0 | 0            |
| cov7_10_11 | 17.0389 | -454.104 | 0.315968  | 0 | 0            | 0 | 0            |
| cov3_6_9   | 17.0562 | -454.112 | 0.3146604 | 0 | 0            | 0 | 0            |
| cov8_10_11 | 17.0586 | -454.113 | 0.3159428 | 0 | 0            | 0 | 0            |

|              |         |          |           |   |             |   |              |
|--------------|---------|----------|-----------|---|-------------|---|--------------|
| cov3_9_11    | 17.0677 | -454.118 | 0.3145664 | 0 | 0           | 0 | 0            |
| cov6_9_11    | 17.0774 | -454.123 | 0.3151411 | 0 | 0           | 0 | 0            |
| cov6_7_10    | 17.0818 | -454.125 | 0.3164015 | 0 | 0           | 0 | 0            |
| cov6_9_10    | 17.0867 | -454.128 | 0.3153761 | 0 | 0           | 0 | 0            |
| cov9_10_11   | 17.0878 | -454.128 | 0.3150949 | 0 | 0           | 0 | 0            |
| cov6_8_10    | 17.0991 | -454.134 | 0.3163656 | 0 | 0           | 0 | 0            |
| cov3_9_10    | 17.1115 | -454.14  | 0.3150077 | 0 | 0           | 0 | 0            |
| cov7_8_10    | 17.1128 | -454.141 | 0.3168219 | 0 | 0           | 0 | 0            |
| cov3_5_7     | 17.1815 | -454.175 | 0.3110838 | 0 | 0           | 0 | 0            |
| cov3_6_10    | 17.2054 | -454.187 | 0.3150043 | 0 | 0           | 0 | 0            |
| cov6_10_11   | 17.2205 | -454.194 | 0.3154157 | 0 | 0           | 0 | 0            |
| cov3_10_11   | 17.2234 | -454.196 | 0.3148915 | 0 | 0           | 0 | 0            |
| cov3_5_8     | 17.2738 | -454.221 | 0.311224  | 0 | 0           | 0 | 0            |
| cov3_4_7     | 17.3165 | -454.242 | 0.3115154 | 0 | 0           | 0 | 0            |
| cov3_4_8     | 17.4013 | -454.285 | 0.3116404 | 0 | 0           | 0 | 0            |
| cov3_6_7     | 18.1285 | -454.648 | 0.3153793 | 0 | 0           | 0 | 0            |
| cov3_6_8     | 18.2141 | -454.691 | 0.3155072 | 0 | 0           | 0 | 0            |
| cov3_7_11    | 18.3024 | -454.735 | 0.31532   | 0 | 0           | 0 | 0            |
| cov3_8_11    | 18.3906 | -454.779 | 0.3154498 | 0 | 0           | 0 | 0            |
| cov1_6_9_11  | 18.4746 | -451.324 | 0.3150944 | 0 | -0.2712812  | 0 | 0            |
| cov1_6_10_11 | 18.5626 | -451.368 | 0.3153004 | 0 | -0.27244611 | 0 | 0            |
| cov1_2_6_9   | 18.5974 | -451.385 | 0.3140431 | 0 | -0.19088343 | 0 | -0.058232827 |
| cov1_2_6_10  | 18.6928 | -451.433 | 0.314252  | 0 | -0.19357612 | 0 | -0.056937437 |
| cov3_7_8     | 18.695  | -454.932 | 0.3170881 | 0 | 0           | 0 | 0            |
| cov1_5_6_9   | 18.8041 | -451.489 | 0.3153537 | 0 | -0.28778086 | 0 | 0            |
| cov1_5_6_10  | 18.8769 | -451.525 | 0.3155548 | 0 | -0.28950531 | 0 | 0            |
| cov3_4_5     | 19.0041 | -455.086 | 0.3145946 | 0 | 0           | 0 | 0            |
| cov3_4_6     | 19.0204 | -455.094 | 0.3151418 | 0 | 0           | 0 | 0            |
| cov1_6_7_9   | 19.0419 | -451.608 | 0.3137665 | 0 | -0.2353914  | 0 | 0            |
| cov1_6_8_9   | 19.0434 | -451.608 | 0.313764  | 0 | -0.23564861 | 0 | 0            |
| cov3_4_11    | 19.0627 | -455.116 | 0.3149662 | 0 | 0           | 0 | 0            |
| cov1_5_6_11  | 19.0706 | -451.622 | 0.3210387 | 0 | -0.37741193 | 0 | 0            |
| cov1_3_6_9   | 19.0828 | -451.628 | 0.3126095 | 0 | -0.23681817 | 0 | 0            |
| cov1_6_9_10  | 19.0979 | -451.636 | 0.3132551 | 0 | -0.23729601 | 0 | 0            |
| cov1_4_6_9   | 19.105  | -451.639 | 0.3133362 | 0 | -0.23846504 | 0 | 0            |
| cov1_6_7_10  | 19.1154 | -451.644 | 0.3139699 | 0 | -0.23702099 | 0 | 0            |
| cov1_6_8_10  | 19.117  | -451.645 | 0.3139671 | 0 | -0.23727629 | 0 | 0            |
| cov3_5_11    | 19.1393 | -455.154 | 0.3150398 | 0 | 0           | 0 | 0            |
| cov3_5_6     | 19.156  | -455.162 | 0.3153297 | 0 | 0           | 0 | 0            |
| cov1_3_6_10  | 19.1585 | -451.666 | 0.3128523 | 0 | -0.23844432 | 0 | 0            |
| cov1_2_5_6   | 19.1712 | -451.672 | 0.3200617 | 0 | -0.29106774 | 0 | -0.065813566 |
| cov1_4_6_10  | 19.1769 | -451.675 | 0.3135532 | 0 | -0.24047132 | 0 | 0            |
| cov4_6_7     | 19.325  | -455.247 | 0.320599  | 0 | 0           | 0 | 0            |
| cov4_6_8     | 19.3436 | -455.256 | 0.3205589 | 0 | 0           | 0 | 0            |
| cov5_6_7     | 19.3456 | -455.257 | 0.3206457 | 0 | 0           | 0 | 0            |
| cov5_6_8     | 19.3663 | -455.267 | 0.3206118 | 0 | 0           | 0 | 0            |
| cov5_7_11    | 19.4062 | -455.287 | 0.3204095 | 0 | 0           | 0 | 0            |

|              |         |          |           |   |             |   |              |
|--------------|---------|----------|-----------|---|-------------|---|--------------|
| cov4_7_11    | 19.4242 | -455.296 | 0.3203343 | 0 | 0           | 0 | 0            |
| cov5_8_11    | 19.4275 | -455.298 | 0.3203849 | 0 | 0           | 0 | 0            |
| cov4_5_7     | 19.4336 | -455.301 | 0.3207103 | 0 | 0           | 0 | 0            |
| cov5_7_8     | 19.4362 | -455.302 | 0.3208602 | 0 | 0           | 0 | 0            |
| cov6_7_8     | 19.4406 | -455.304 | 0.3213664 | 0 | 0           | 0 | 0            |
| cov4_8_11    | 19.4435 | -455.306 | 0.3203067 | 0 | 0           | 0 | 0            |
| cov4_5_8     | 19.4509 | -455.31  | 0.3206753 | 0 | 0           | 0 | 0            |
| cov6_7_11    | 19.4637 | -455.316 | 0.3210393 | 0 | 0           | 0 | 0            |
| cov6_8_11    | 19.4881 | -455.328 | 0.3210157 | 0 | 0           | 0 | 0            |
| cov3_6_11    | 19.505  | -455.337 | 0.3179343 | 0 | 0           | 0 | 0            |
| cov4_5_6     | 19.5307 | -455.35  | 0.3195766 | 0 | 0           | 0 | 0            |
| cov4_6_11    | 19.5342 | -455.351 | 0.3196413 | 0 | 0           | 0 | 0            |
| cov4_7_8     | 19.5407 | -455.355 | 0.3211744 | 0 | 0           | 0 | 0            |
| cov1_4_5_6   | 19.5696 | -451.872 | 0.3187217 | 0 | -0.34603788 | 0 | 0            |
| cov5_6_11    | 19.6134 | -455.391 | 0.3197244 | 0 | 0           | 0 | 0            |
| cov4_5_11    | 19.6471 | -455.408 | 0.3194219 | 0 | 0           | 0 | 0            |
| cov1_5_6_7   | 19.7426 | -451.958 | 0.3196951 | 0 | -0.33750928 | 0 | 0            |
| cov1_5_6_8   | 19.7444 | -451.959 | 0.3196916 | 0 | -0.33778817 | 0 | 0            |
| cov7_8_11    | 19.7688 | -455.469 | 0.3215305 | 0 | 0           | 0 | 0            |
| cov1_3_5_6   | 19.8109 | -451.992 | 0.3197038 | 0 | -0.34433308 | 0 | 0            |
| cov1_2_6_11  | 19.8459 | -452.01  | 0.3200636 | 0 | -0.23467905 | 0 | -0.067469667 |
| cov1_2_4_6   | 19.8516 | -452.013 | 0.3202548 | 0 | -0.21122495 | 0 | -0.10480019  |
| cov1_3_6_11  | 20.1178 | -452.146 | 0.3160515 | 0 | -0.28924161 | 0 | 0            |
| cov1_3_6_7   | 20.2462 | -452.21  | 0.313176  | 0 | -0.2358391  | 0 | 0            |
| cov1_3_6_8   | 20.2627 | -452.218 | 0.3132319 | 0 | -0.2371786  | 0 | 0            |
| cov1_4_6_11  | 20.3204 | -452.247 | 0.3198854 | 0 | -0.3054023  | 0 | 0            |
| cov1_6_7_11  | 20.5102 | -452.342 | 0.3192753 | 0 | -0.28340095 | 0 | 0            |
| cov1_6_8_11  | 20.5105 | -452.342 | 0.3192751 | 0 | -0.28354098 | 0 | 0            |
| cov1_2_3_6   | 20.5353 | -452.354 | 0.3155401 | 0 | -0.19930487 | 0 | -0.06032195  |
| cov1_2_6_7   | 20.5752 | -452.374 | 0.3185519 | 0 | -0.19644702 | 0 | -0.062193823 |
| cov1_2_6_8   | 20.5768 | -452.375 | 0.318551  | 0 | -0.19681164 | 0 | -0.062192512 |
| cov2_5_6_9   | 20.7905 | -452.482 | 0.3145736 | 0 | 0           | 0 | -0.1119383   |
| cov2_6_9_11  | 20.8172 | -452.495 | 0.3173401 | 0 | 0           | 0 | -0.1304288   |
| cov2_6_7_9   | 20.8185 | -452.496 | 0.3170037 | 0 | 0           | 0 | -0.12324316  |
| cov2_6_8_9   | 20.8289 | -452.501 | 0.3169839 | 0 | 0           | 0 | -0.12337255  |
| cov2_4_6_9   | 20.8723 | -452.523 | 0.3174489 | 0 | 0           | 0 | -0.13911275  |
| cov1_4_6_7   | 20.9293 | -452.551 | 0.3188108 | 0 | -0.26621005 | 0 | 0            |
| cov1_4_6_8   | 20.9317 | -452.553 | 0.3188067 | 0 | -0.26656749 | 0 | 0            |
| cov2_3_6_9   | 20.9378 | -452.556 | 0.3158023 | 0 | 0           | 0 | -0.12330651  |
| cov2_5_6_10  | 20.9489 | -452.561 | 0.3148541 | 0 | 0           | 0 | -0.11121942  |
| cov2_6_9_10  | 20.9513 | -452.562 | 0.3162984 | 0 | 0           | 0 | -0.12363911  |
| cov2_6_7_10  | 20.9821 | -452.578 | 0.3173461 | 0 | 0           | 0 | -0.12295999  |
| cov2_6_8_10  | 20.9926 | -452.583 | 0.3173257 | 0 | 0           | 0 | -0.12308956  |
| cov2_6_10_11 | 20.9932 | -452.583 | 0.3176428 | 0 | 0           | 0 | -0.12986377  |
| cov1_3_4_6   | 20.9995 | -452.586 | 0.3159438 | 0 | -0.26076223 | 0 | 0            |
| cov1_2_5_11  | 21.0103 | -452.592 | 0.322016  | 0 | -0.17807797 | 0 | -0.065033283 |
| cov2_4_6_10  | 21.0323 | -452.603 | 0.3178081 | 0 | 0           | 0 | -0.13934205  |

|              |         |          |           |   |              |   |              |
|--------------|---------|----------|-----------|---|--------------|---|--------------|
| cov2_3_6_10  | 21.1033 | -452.638 | 0.3161478 | 0 | 0            | 0 | -0.12303572  |
| cov1_6_7_8   | 21.1533 | -452.663 | 0.3178488 | 0 | -0.24590059  | 0 | 0            |
| cov1_2_9_11  | 21.1727 | -452.673 | 0.3165972 | 0 | -0.065562476 | 0 | -0.05721686  |
| cov1_5_9_11  | 21.174  | -452.674 | 0.3180408 | 0 | -0.18084902  | 0 | 0            |
| cov1_5_10_11 | 21.2282 | -452.701 | 0.3182447 | 0 | -0.18338126  | 0 | 0            |
| cov1_2_10_11 | 21.2518 | -452.713 | 0.3167836 | 0 | -0.068145919 | 0 | -0.05621175  |
| cov2_4_9_11  | 21.3834 | -452.778 | 0.3191218 | 0 | 0            | 0 | -0.12619512  |
| cov1_2_4_11  | 21.4347 | -452.804 | 0.3225509 | 0 | -0.10740732  | 0 | -0.1095544   |
| cov2_4_10_11 | 21.5022 | -452.838 | 0.3193979 | 0 | 0            | 0 | -0.12707721  |
| cov1_4_5_11  | 21.5095 | -452.842 | 0.3206082 | 0 | -0.22929458  | 0 | 0            |
| cov1_3_9_11  | 21.524  | -452.849 | 0.3140152 | 0 | -0.11502324  | 0 | 0            |
| cov2_3_9_11  | 21.5516 | -452.863 | 0.3160877 | 0 | 0            | 0 | -0.096100215 |
| cov1_3_10_11 | 21.5916 | -452.883 | 0.3142229 | 0 | -0.11660162  | 0 | 0            |
| cov2_7_9_11  | 21.5952 | -452.884 | 0.3173922 | 0 | 0            | 0 | -0.092841435 |
| cov2_8_9_11  | 21.6024 | -452.888 | 0.3173689 | 0 | 0            | 0 | -0.093061895 |
| cov1_4_9_11  | 21.6124 | -452.893 | 0.3159897 | 0 | -0.1235679   | 0 | 0            |
| cov2_5_9_11  | 21.6261 | -452.9   | 0.3173595 | 0 | 0            | 0 | -0.097213062 |
| cov1_3_5_11  | 21.6287 | -452.901 | 0.3202116 | 0 | -0.22520899  | 0 | 0            |
| cov2_9_10_11 | 21.629  | -452.901 | 0.3171563 | 0 | 0            | 0 | -0.094741463 |
| cov1_5_7_11  | 21.636  | -452.905 | 0.3208506 | 0 | -0.22719288  | 0 | 0            |
| cov1_5_8_11  | 21.6374 | -452.905 | 0.3208271 | 0 | -0.22763302  | 0 | 0            |
| cov1_7_9_11  | 21.6556 | -452.915 | 0.3155773 | 0 | -0.11016507  | 0 | 0            |
| cov1_8_9_11  | 21.6578 | -452.916 | 0.3155489 | 0 | -0.110518    | 0 | 0            |
| cov1_9_10_11 | 21.658  | -452.916 | 0.3154821 | 0 | -0.11133336  | 0 | 0            |
| cov1_4_10_11 | 21.6707 | -452.922 | 0.3161821 | 0 | -0.12554847  | 0 | 0            |
| cov2_3_10_11 | 21.6757 | -452.925 | 0.3163798 | 0 | 0            | 0 | -0.096772901 |
| cov2_7_10_11 | 21.7116 | -452.943 | 0.3176635 | 0 | 0            | 0 | -0.093406805 |
| cov1_7_10_11 | 21.7171 | -452.945 | 0.3157594 | 0 | -0.11175777  | 0 | 0            |
| cov2_8_10_11 | 21.7191 | -452.946 | 0.3176404 | 0 | 0            | 0 | -0.093627996 |
| cov1_8_10_11 | 21.7192 | -452.946 | 0.3157308 | 0 | -0.11211007  | 0 | 0            |
| cov1_2_5_9   | 21.7202 | -452.947 | 0.3169342 | 0 | -0.085383111 | 0 | -0.054177936 |
| cov2_5_10_11 | 21.7469 | -452.96  | 0.3175707 | 0 | 0            | 0 | -0.097234708 |
| cov1_2_5_10  | 21.7742 | -452.974 | 0.317131  | 0 | -0.088561155 | 0 | -0.053643504 |
| cov2_4_7_9   | 21.7833 | -452.978 | 0.3180797 | 0 | 0            | 0 | -0.10338386  |
| cov2_4_8_9   | 21.8032 | -452.988 | 0.3180197 | 0 | 0            | 0 | -0.10313598  |
| cov2_3_7_9   | 21.8391 | -453.006 | 0.313064  | 0 | 0            | 0 | -0.061253854 |
| cov2_4_7_10  | 21.8635 | -453.019 | 0.3183661 | 0 | 0            | 0 | -0.10472512  |
| cov1_2_4_9   | 21.8768 | -453.025 | 0.3163178 | 0 | -0.030272324 | 0 | -0.080625052 |
| cov2_3_8_9   | 21.8818 | -453.028 | 0.3131373 | 0 | 0            | 0 | -0.061411039 |
| cov2_4_8_10  | 21.8834 | -453.028 | 0.3183055 | 0 | 0            | 0 | -0.10447366  |
| cov2_3_7_10  | 21.9212 | -453.047 | 0.3133521 | 0 | 0            | 0 | -0.062693255 |
| cov1_2_4_10  | 21.9342 | -453.054 | 0.3165014 | 0 | -0.032905767 | 0 | -0.08000962  |
| cov2_3_8_10  | 21.9637 | -453.069 | 0.3134265 | 0 | 0            | 0 | -0.062849382 |
| cov2_3_4_9   | 21.9844 | -453.079 | 0.3174997 | 0 | 0            | 0 | -0.10223787  |
| cov2_3_6_7   | 21.9919 | -453.083 | 0.3161609 | 0 | 0            | 0 | -0.12383854  |
| cov2_4_5_9   | 21.9958 | -453.085 | 0.3167502 | 0 | 0            | 0 | -0.098545067 |
| cov2_4_9_10  | 21.9958 | -453.085 | 0.3167837 | 0 | 0            | 0 | -0.09882389  |



|             |         |          |           |   |              |   |              |
|-------------|---------|----------|-----------|---|--------------|---|--------------|
| cov2_5_7_9  | 22.0368 | -453.105 | 0.3167863 | 0 | 0            | 0 | -0.081354797 |
| cov2_3_6_8  | 22.0439 | -453.109 | 0.3162665 | 0 | 0            | 0 | -0.12445053  |
| cov2_5_8_9  | 22.052  | -453.113 | 0.3167455 | 0 | 0            | 0 | -0.081366586 |
| cov1_2_5_7  | 22.0551 | -453.114 | 0.3202953 | 0 | -0.12490318  | 0 | -0.058330963 |
| cov1_5_7_9  | 22.058  | -453.116 | 0.3164909 | 0 | -0.12527967  | 0 | 0            |
| cov1_4_5_9  | 22.0607 | -453.117 | 0.3158946 | 0 | -0.13041614  | 0 | 0            |
| cov2_3_4_10 | 22.0645 | -453.119 | 0.3177961 | 0 | 0            | 0 | -0.1035745   |
| cov1_2_5_8  | 22.0687 | -453.121 | 0.3202577 | 0 | -0.12508663  | 0 | -0.058283229 |
| cov1_5_8_9  | 22.0706 | -453.122 | 0.3164524 | 0 | -0.12545114  | 0 | 0            |
| cov2_4_5_10 | 22.0752 | -453.124 | 0.3169642 | 0 | 0            | 0 | -0.099387244 |
| cov2_7_8_9  | 22.0962 | -453.135 | 0.315279  | 0 | 0            | 0 | -0.063281758 |
| cov1_5_7_10 | 22.1028 | -453.138 | 0.3166684 | 0 | -0.12746927  | 0 | 0            |
| cov1_4_5_10 | 22.1085 | -453.141 | 0.3160765 | 0 | -0.13276164  | 0 | 0            |
| cov1_2_7_9  | 22.115  | -453.144 | 0.314904  | 0 | -0.015853885 | 0 | -0.050868246 |
| cov1_5_8_10 | 22.1154 | -453.144 | 0.316631  | 0 | -0.12760609  | 0 | 0            |
| cov2_5_7_10 | 22.128  | -453.151 | 0.316999  | 0 | 0            | 0 | -0.081711445 |
| cov1_2_8_9  | 22.1295 | -453.152 | 0.3148619 | 0 | -0.015958189 | 0 | -0.050816791 |
| cov1_3_7_11 | 22.134  | -453.154 | 0.3143408 | 0 | -0.12628952  | 0 | 0            |
| cov1_2_3_11 | 22.1362 | -453.155 | 0.3170191 | 0 | -0.093369629 | 0 | -0.05980514  |
| cov1_3_5_9  | 22.1412 | -453.157 | 0.3166722 | 0 | -0.13281323  | 0 | 0            |
| cov2_5_8_10 | 22.1432 | -453.158 | 0.3169584 | 0 | 0            | 0 | -0.081720509 |
| cov1_2_3_5  | 22.148  | -453.161 | 0.3207558 | 0 | -0.13539201  | 0 | -0.058729378 |
| cov2_7_9_10 | 22.149  | -453.161 | 0.3153419 | 0 | 0            | 0 | -0.063382608 |
| cov1_5_9_10 | 22.1577 | -453.166 | 0.3158827 | 0 | -0.12722459  | 0 | 0            |
| cov2_8_9_10 | 22.1639 | -453.169 | 0.3153029 | 0 | 0            | 0 | -0.063413961 |
| cov2_3_5_9  | 22.171  | -453.172 | 0.3158265 | 0 | 0            | 0 | -0.080943182 |
| cov2_5_9_10 | 22.1722 | -453.173 | 0.3160452 | 0 | 0            | 0 | -0.081668018 |
| cov2_7_8_10 | 22.1725 | -453.173 | 0.3155663 | 0 | 0            | 0 | -0.064697385 |
| cov1_2_4_5  | 22.1744 | -453.174 | 0.3197362 | 0 | -0.12356233  | 0 | -0.063112338 |
| cov1_3_8_11 | 22.1754 | -453.174 | 0.3144323 | 0 | -0.1270885   | 0 | 0            |
| cov1_2_7_10 | 22.1765 | -453.175 | 0.3150832 | 0 | -0.018748905 | 0 | -0.049867744 |
| cov1_3_7_9  | 22.183  | -453.178 | 0.3118328 | 0 | -0.056971232 | 0 | 0            |
| cov1_3_5_10 | 22.1841 | -453.179 | 0.3168734 | 0 | -0.13511924  | 0 | 0            |
| cov1_2_8_10 | 22.1909 | -453.182 | 0.3150406 | 0 | -0.018852937 | 0 | -0.049815613 |
| cov1_3_8_9  | 22.2244 | -453.199 | 0.3118977 | 0 | -0.057177788 | 0 | 0            |
| cov1_2_3_9  | 22.2266 | -453.2   | 0.3135605 | 0 | -0.017264675 | 0 | -0.049828726 |
| cov1_2_9_10 | 22.2409 | -453.207 | 0.3141326 | 0 | -0.017442573 | 0 | -0.049971243 |
| cov1_3_7_10 | 22.2415 | -453.208 | 0.312038  | 0 | -0.058875492 | 0 | 0            |
| cov2_3_5_10 | 22.2625 | -453.218 | 0.316019  | 0 | 0            | 0 | -0.081231093 |
| cov2_3_9_10 | 22.2673 | -453.22  | 0.3140482 | 0 | 0            | 0 | -0.063467967 |
| cov1_3_8_10 | 22.2822 | -453.228 | 0.312103  | 0 | -0.059082865 | 0 | 0            |
| cov1_2_3_10 | 22.2886 | -453.231 | 0.3137635 | 0 | -0.020147011 | 0 | -0.048852276 |
| cov2_3_7_11 | 22.2933 | -453.233 | 0.3164334 | 0 | 0            | 0 | -0.10404706  |
| cov2_3_8_11 | 22.3475 | -453.261 | 0.3165497 | 0 | 0            | 0 | -0.10458581  |
| cov2_4_6_7  | 22.3565 | -453.265 | 0.3239869 | 0 | 0            | 0 | -0.17222863  |
| cov2_4_6_8  | 22.3754 | -453.274 | 0.3239543 | 0 | 0            | 0 | -0.17224465  |
| cov1_2_4_7  | 22.4273 | -453.3   | 0.3211523 | 0 | -0.051872964 | 0 | -0.10296234  |

|             |         |          |           |   |              |   |              |
|-------------|---------|----------|-----------|---|--------------|---|--------------|
| cov1_4_7_9  | 22.4459 | -453.31  | 0.3146902 | 0 | -0.072382974 | 0 | 0            |
| cov1_2_4_8  | 22.45   | -453.312 | 0.3210961 | 0 | -0.051947195 | 0 | -0.10273193  |
| cov1_7_8_9  | 22.4507 | -453.312 | 0.3140072 | 0 | -0.059135526 | 0 | 0            |
| cov1_4_5_7  | 22.461  | -453.317 | 0.3190797 | 0 | -0.17486381  | 0 | 0            |
| cov1_4_8_9  | 22.461  | -453.317 | 0.3146413 | 0 | -0.072286038 | 0 | 0            |
| cov1_4_5_8  | 22.4712 | -453.322 | 0.3190415 | 0 | -0.17503163  | 0 | 0            |
| cov2_3_4_7  | 22.4764 | -453.325 | 0.3182209 | 0 | 0            | 0 | -0.11485014  |
| cov1_2_7_11 | 22.4786 | -453.326 | 0.3201788 | 0 | -0.087196403 | 0 | -0.06093994  |
| cov2_4_7_11 | 22.4819 | -453.328 | 0.3243733 | 0 | 0            | 0 | -0.16192177  |
| cov1_2_8_11 | 22.4827 | -453.328 | 0.3201537 | 0 | -0.087536995 | 0 | -0.060940087 |
| cov1_4_7_10 | 22.4893 | -453.331 | 0.3148723 | 0 | -0.074533056 | 0 | 0            |
| cov2_4_6_11 | 22.4968 | -453.335 | 0.3238823 | 0 | 0            | 0 | -0.17798105  |
| cov1_7_9_10 | 22.4971 | -453.335 | 0.3140626 | 0 | -0.059448832 | 0 | 0            |
| cov1_7_8_10 | 22.4972 | -453.335 | 0.3141809 | 0 | -0.06107399  | 0 | 0            |
| cov2_4_8_11 | 22.4993 | -453.336 | 0.3243418 | 0 | 0            | 0 | -0.16196506  |
| cov1_4_8_10 | 22.5042 | -453.339 | 0.3148231 | 0 | -0.074435774 | 0 | 0            |
| cov1_8_9_10 | 22.5108 | -453.342 | 0.3140218 | 0 | -0.059508805 | 0 | 0            |
| cov1_3_5_7  | 22.5135 | -453.344 | 0.3176401 | 0 | -0.15473729  | 0 | 0            |
| cov1_5_7_8  | 22.5184 | -453.346 | 0.3193368 | 0 | -0.17333541  | 0 | 0            |
| cov1_3_4_5  | 22.5278 | -453.351 | 0.3190729 | 0 | -0.18104014  | 0 | 0            |
| cov2_3_4_8  | 22.5285 | -453.351 | 0.3183768 | 0 | 0            | 0 | -0.11582419  |
| cov1_3_5_8  | 22.5384 | -453.356 | 0.3178342 | 0 | -0.15735076  | 0 | 0            |
| cov2_4_5_6  | 22.559  | -453.366 | 0.3222191 | 0 | 0            | 0 | -0.1740993   |
| cov1_3_4_11 | 22.5742 | -453.374 | 0.3170686 | 0 | -0.15735566  | 0 | 0            |
| cov1_3_4_9  | 22.5754 | -453.374 | 0.3133132 | 0 | -0.068698395 | 0 | 0            |
| cov1_4_9_10 | 22.5776 | -453.376 | 0.3137859 | 0 | -0.070637986 | 0 | 0            |
| cov1_3_9_10 | 22.5936 | -453.384 | 0.3127177 | 0 | -0.059912809 | 0 | 0            |
| cov2_4_5_11 | 22.607  | -453.39  | 0.3235106 | 0 | 0            | 0 | -0.16383205  |
| cov1_3_4_10 | 22.6197 | -453.397 | 0.3135533 | 0 | -0.071133327 | 0 | 0            |
| cov1_2_3_7  | 22.6336 | -453.404 | 0.3137381 | 0 | -0.029594422 | 0 | -0.051952127 |
| cov2_3_4_11 | 22.65   | -453.412 | 0.3225568 | 0 | 0            | 0 | -0.15881055  |
| cov3_5_7_9  | 22.6546 | -453.414 | 0.3097042 | 0 | 0            | 0 | 0            |
| cov1_2_3_8  | 22.6918 | -453.433 | 0.313825  | 0 | -0.030005703 | 0 | -0.051939556 |
| cov2_3_4_6  | 22.6937 | -453.434 | 0.3219776 | 0 | 0            | 0 | -0.16642317  |
| cov2_3_7_8  | 22.713  | -453.443 | 0.314559  | 0 | 0            | 0 | -0.076321679 |
| cov3_5_8_9  | 22.7142 | -453.444 | 0.309807  | 0 | 0            | 0 | 0            |
| cov2_3_5_7  | 22.7177 | -453.446 | 0.3158745 | 0 | 0            | 0 | -0.088217029 |
| cov3_5_6_9  | 22.7327 | -453.453 | 0.308669  | 0 | 0            | 0 | 0            |
| cov1_2_3_4  | 22.7382 | -453.456 | 0.320281  | 0 | -0.054517103 | 0 | -0.10090232  |
| cov1_4_7_11 | 22.7411 | -453.457 | 0.3200051 | 0 | -0.16155442  | 0 | 0            |
| cov3_4_7_9  | 22.7446 | -453.459 | 0.3101251 | 0 | 0            | 0 | 0            |
| cov1_4_8_11 | 22.7473 | -453.46  | 0.3199757 | 0 | -0.16181817  | 0 | 0            |
| cov3_5_7_10 | 22.7476 | -453.461 | 0.3098699 | 0 | 0            | 0 | 0            |
| cov2_4_7_8  | 22.7601 | -453.467 | 0.3227018 | 0 | 0            | 0 | -0.14065653  |
| cov2_3_5_8  | 22.7746 | -453.474 | 0.3160461 | 0 | 0            | 0 | -0.089218017 |
| cov3_4_8_9  | 22.7985 | -453.486 | 0.3102149 | 0 | 0            | 0 | 0            |
| cov2_4_5_7  | 22.8045 | -453.489 | 0.3226618 | 0 | 0            | 0 | -0.13987501  |

|              |         |          |           |   |              |   |             |
|--------------|---------|----------|-----------|---|--------------|---|-------------|
| cov3_5_8_10  | 22.8071 | -453.49  | 0.3099728 | 0 | 0            | 0 | 0           |
| cov2_4_5_8   | 22.8286 | -453.501 | 0.3226148 | 0 | 0            | 0 | -0.13973347 |
| cov2_3_6_11  | 22.8339 | -453.504 | 0.3192949 | 0 | 0            | 0 | -0.13826678 |
| cov5_6_7_9   | 22.8426 | -453.508 | 0.3121913 | 0 | 0            | 0 | 0           |
| cov5_6_8_9   | 22.8546 | -453.514 | 0.3121583 | 0 | 0            | 0 | 0           |
| cov3_5_6_10  | 22.8606 | -453.517 | 0.3089446 | 0 | 0            | 0 | 0           |
| cov3_4_7_10  | 22.8643 | -453.519 | 0.3103624 | 0 | 0            | 0 | 0           |
| cov3_4_8_10  | 22.9182 | -453.546 | 0.3104532 | 0 | 0            | 0 | 0           |
| cov4_5_6_9   | 22.9489 | -453.561 | 0.3114235 | 0 | 0            | 0 | 0           |
| cov2_6_7_11  | 22.9537 | -453.564 | 0.3222509 | 0 | 0            | 0 | -0.13577124 |
| cov5_6_7_10  | 22.9616 | -453.568 | 0.3124271 | 0 | 0            | 0 | 0           |
| cov5_6_9_10  | 22.964  | -453.569 | 0.3114039 | 0 | 0            | 0 | 0           |
| cov5_6_9_11  | 22.9646 | -453.569 | 0.3116843 | 0 | 0            | 0 | 0           |
| cov2_6_8_11  | 22.9648 | -453.569 | 0.3222386 | 0 | 0            | 0 | -0.13597887 |
| cov5_6_8_10  | 22.9735 | -453.574 | 0.3123928 | 0 | 0            | 0 | 0           |
| cov1_3_7_8   | 22.9935 | -453.584 | 0.3129004 | 0 | -0.074164532 | 0 | 0           |
| cov2_5_6_7   | 22.9957 | -453.585 | 0.3220614 | 0 | 0            | 0 | -0.13559223 |
| cov1_7_8_11  | 22.9969 | -453.585 | 0.3191532 | 0 | -0.13644142  | 0 | 0           |
| cov2_5_6_8   | 23.0097 | -453.592 | 0.3220324 | 0 | 0            | 0 | -0.1357223  |
| cov1_3_4_7   | 23.0115 | -453.592 | 0.3136631 | 0 | -0.083597864 | 0 | 0           |
| cov2_6_7_8   | 23.0323 | -453.603 | 0.321437  | 0 | 0            | 0 | -0.12908183 |
| cov2_3_5_11  | 23.063  | -453.618 | 0.3196796 | 0 | 0            | 0 | -0.12431911 |
| cov2_5_6_11  | 23.0633 | -453.618 | 0.3221581 | 0 | 0            | 0 | -0.14235164 |
| cov1_3_4_8   | 23.0666 | -453.62  | 0.3137855 | 0 | -0.084490043 | 0 | 0           |
| cov4_5_6_10  | 23.0737 | -453.624 | 0.3116587 | 0 | 0            | 0 | 0           |
| cov5_6_10_11 | 23.0864 | -453.63  | 0.3118879 | 0 | 0            | 0 | 0           |
| cov2_3_5_6   | 23.0911 | -453.632 | 0.3188018 | 0 | 0            | 0 | -0.13164823 |
| cov3_4_6_9   | 23.0954 | -453.634 | 0.310527  | 0 | 0            | 0 | 0           |
| cov2_5_7_11  | 23.1199 | -453.647 | 0.3226377 | 0 | 0            | 0 | -0.12712468 |
| cov3_5_9_11  | 23.1247 | -453.649 | 0.3109669 | 0 | 0            | 0 | 0           |
| cov2_5_8_11  | 23.1323 | -453.653 | 0.3226157 | 0 | 0            | 0 | -0.12729619 |
| cov2_3_4_5   | 23.1493 | -453.661 | 0.3213766 | 0 | 0            | 0 | -0.13768466 |
| cov3_5_10_11 | 23.2392 | -453.706 | 0.3111814 | 0 | 0            | 0 | 0           |
| cov3_4_9_11  | 23.2433 | -453.708 | 0.3115132 | 0 | 0            | 0 | 0           |
| cov4_6_7_9   | 23.2498 | -453.712 | 0.3136151 | 0 | 0            | 0 | 0           |
| cov2_7_8_11  | 23.2532 | -453.713 | 0.3216626 | 0 | 0            | 0 | -0.11175042 |
| cov5_7_9_11  | 23.257  | -453.715 | 0.3138144 | 0 | 0            | 0 | 0           |
| cov4_6_8_9   | 23.2595 | -453.717 | 0.3135724 | 0 | 0            | 0 | 0           |
| cov3_4_6_10  | 23.2626 | -453.718 | 0.310923  | 0 | 0            | 0 | 0           |
| cov5_8_9_11  | 23.2692 | -453.721 | 0.3137779 | 0 | 0            | 0 | 0           |
| cov2_5_7_8   | 23.2854 | -453.729 | 0.3216222 | 0 | 0            | 0 | -0.11498287 |
| cov5_7_8_9   | 23.2932 | -453.733 | 0.3136735 | 0 | 0            | 0 | 0           |
| cov4_5_9_11  | 23.3131 | -453.743 | 0.3132493 | 0 | 0            | 0 | 0           |
| cov4_6_9_10  | 23.3182 | -453.746 | 0.3130216 | 0 | 0            | 0 | 0           |
| cov4_6_9_11  | 23.3222 | -453.748 | 0.3130414 | 0 | 0            | 0 | 0           |
| cov4_5_7_9   | 23.3298 | -453.752 | 0.3136539 | 0 | 0            | 0 | 0           |
| cov3_4_5_9   | 23.3326 | -453.753 | 0.311269  | 0 | 0            | 0 | 0           |

|              |         |          |           |   |              |   |              |
|--------------|---------|----------|-----------|---|--------------|---|--------------|
| cov5_9_10_11 | 23.3357 | -453.755 | 0.3132521 | 0 | 0            | 0 | 0            |
| cov5_7_9_10  | 23.3392 | -453.756 | 0.3137048 | 0 | 0            | 0 | 0            |
| cov4_5_8_9   | 23.3442 | -453.759 | 0.3136131 | 0 | 0            | 0 | 0            |
| cov5_8_9_10  | 23.3548 | -453.764 | 0.3136655 | 0 | 0            | 0 | 0            |
| cov5_7_10_11 | 23.3594 | -453.766 | 0.3139956 | 0 | 0            | 0 | 0            |
| cov4_7_8_9   | 23.3597 | -453.767 | 0.3139862 | 0 | 0            | 0 | 0            |
| cov5_8_10_11 | 23.3717 | -453.773 | 0.3139593 | 0 | 0            | 0 | 0            |
| cov3_4_9_10  | 23.3782 | -453.776 | 0.3116063 | 0 | 0            | 0 | 0            |
| cov5_7_8_10  | 23.3843 | -453.779 | 0.3138494 | 0 | 0            | 0 | 0            |
| cov3_4_10_11 | 23.3887 | -453.781 | 0.311799  | 0 | 0            | 0 | 0            |
| cov3_5_9_10  | 23.3909 | -453.782 | 0.3114955 | 0 | 0            | 0 | 0            |
| cov4_7_9_11  | 23.3917 | -453.783 | 0.3141609 | 0 | 0            | 0 | 0            |
| cov4_8_9_11  | 23.4023 | -453.788 | 0.3141235 | 0 | 0            | 0 | 0            |
| cov4_6_7_10  | 23.4051 | -453.789 | 0.3139617 | 0 | 0            | 0 | 0            |
| cov4_7_9_10  | 23.4107 | -453.792 | 0.3140321 | 0 | 0            | 0 | 0            |
| cov4_6_8_10  | 23.4149 | -453.794 | 0.3139189 | 0 | 0            | 0 | 0            |
| cov4_8_9_10  | 23.4232 | -453.798 | 0.3139886 | 0 | 0            | 0 | 0            |
| cov4_5_10_11 | 23.4233 | -453.798 | 0.3134226 | 0 | 0            | 0 | 0            |
| cov4_5_7_10  | 23.4244 | -453.799 | 0.3138403 | 0 | 0            | 0 | 0            |
| cov3_4_5_10  | 23.4318 | -453.803 | 0.3114558 | 0 | 0            | 0 | 0            |
| cov1_2_7_8   | 23.4385 | -453.806 | 0.3183442 | 0 | -0.037616485 | 0 | -0.054551364 |
| cov4_5_8_10  | 23.4389 | -453.806 | 0.3137989 | 0 | 0            | 0 | 0            |
| cov4_5_9_10  | 23.4425 | -453.808 | 0.3129395 | 0 | 0            | 0 | 0            |
| cov4_9_10_11 | 23.4534 | -453.813 | 0.3136943 | 0 | 0            | 0 | 0            |
| cov4_6_10_11 | 23.4775 | -453.826 | 0.3133398 | 0 | 0            | 0 | 0            |
| cov3_7_9_11  | 23.4779 | -453.826 | 0.3132793 | 0 | 0            | 0 | 0            |
| cov4_7_8_10  | 23.48   | -453.827 | 0.3142539 | 0 | 0            | 0 | 0            |
| cov3_7_8_9   | 23.4847 | -453.829 | 0.3137643 | 0 | 0            | 0 | 0            |
| cov3_6_7_9   | 23.505  | -453.839 | 0.3135553 | 0 | 0            | 0 | 0            |
| cov4_7_10_11 | 23.5213 | -453.847 | 0.3144043 | 0 | 0            | 0 | 0            |
| cov3_8_9_11  | 23.5309 | -453.852 | 0.3133662 | 0 | 0            | 0 | 0            |
| cov4_8_10_11 | 23.5321 | -453.853 | 0.3143666 | 0 | 0            | 0 | 0            |
| cov3_7_9_10  | 23.5405 | -453.857 | 0.3137811 | 0 | 0            | 0 | 0            |
| cov3_6_8_9   | 23.5573 | -453.865 | 0.3136395 | 0 | 0            | 0 | 0            |
| cov1_4_7_8   | 23.5744 | -453.874 | 0.3185307 | 0 | -0.11101973  | 0 | 0            |
| cov3_8_9_10  | 23.5927 | -453.883 | 0.3138658 | 0 | 0            | 0 | 0            |
| cov3_7_10_11 | 23.6306 | -453.902 | 0.3135842 | 0 | 0            | 0 | 0            |
| cov3_6_7_10  | 23.6597 | -453.917 | 0.3138877 | 0 | 0            | 0 | 0            |
| cov3_7_8_10  | 23.6687 | -453.921 | 0.3142174 | 0 | 0            | 0 | 0            |
| cov3_8_10_11 | 23.6839 | -453.929 | 0.3136721 | 0 | 0            | 0 | 0            |
| cov3_6_8_10  | 23.7121 | -453.943 | 0.3139734 | 0 | 0            | 0 | 0            |
| cov7_8_9_11  | 23.8329 | -454.003 | 0.3156275 | 0 | 0            | 0 | 0            |
| cov6_7_8_9   | 23.8672 | -454.02  | 0.315999  | 0 | 0            | 0 | 0            |
| cov6_7_9_11  | 23.8904 | -454.032 | 0.3156924 | 0 | 0            | 0 | 0            |
| cov7_9_10_11 | 23.8905 | -454.032 | 0.3156858 | 0 | 0            | 0 | 0            |
| cov6_8_9_11  | 23.9095 | -454.042 | 0.3156675 | 0 | 0            | 0 | 0            |
| cov8_9_10_11 | 23.9097 | -454.042 | 0.3156609 | 0 | 0            | 0 | 0            |

|                |         |          |           |   |             |   |              |
|----------------|---------|----------|-----------|---|-------------|---|--------------|
| cov7_8_9_10    | 23.9267 | -454.05  | 0.3163579 | 0 | 0           | 0 | 0            |
| cov6_7_9_10    | 23.9298 | -454.052 | 0.3160749 | 0 | 0           | 0 | 0            |
| cov3_5_6_7     | 23.9432 | -454.058 | 0.3094896 | 0 | 0           | 0 | 0            |
| cov6_8_9_10    | 23.9471 | -454.06  | 0.31604   | 0 | 0           | 0 | 0            |
| cov7_8_10_11   | 23.9759 | -454.075 | 0.3159119 | 0 | 0           | 0 | 0            |
| cov6_7_8_10    | 24.0129 | -454.093 | 0.3163273 | 0 | 0           | 0 | 0            |
| cov6_7_10_11   | 24.03   | -454.102 | 0.3159805 | 0 | 0           | 0 | 0            |
| cov3_5_6_8     | 24.0384 | -454.106 | 0.309636  | 0 | 0           | 0 | 0            |
| cov3_6_9_11    | 24.0468 | -454.11  | 0.3145618 | 0 | 0           | 0 | 0            |
| cov6_8_10_11   | 24.0494 | -454.111 | 0.3159549 | 0 | 0           | 0 | 0            |
| cov3_6_9_10    | 24.0508 | -454.112 | 0.3146667 | 0 | 0           | 0 | 0            |
| cov3_9_10_11   | 24.0621 | -454.118 | 0.3145763 | 0 | 0           | 0 | 0            |
| cov6_9_10_11   | 24.0713 | -454.122 | 0.3151423 | 0 | 0           | 0 | 0            |
| cov3_5_7_11    | 24.0736 | -454.124 | 0.3107932 | 0 | 0           | 0 | 0            |
| cov3_4_5_7     | 24.1243 | -454.149 | 0.3108337 | 0 | 0           | 0 | 0            |
| cov3_5_7_8     | 24.1321 | -454.153 | 0.3110407 | 0 | 0           | 0 | 0            |
| cov3_5_8_11    | 24.1673 | -454.17  | 0.3109378 | 0 | 0           | 0 | 0            |
| cov3_6_10_11   | 24.1934 | -454.183 | 0.3148764 | 0 | 0           | 0 | 0            |
| cov3_4_5_8     | 24.2138 | -454.194 | 0.3109673 | 0 | 0           | 0 | 0            |
| cov3_4_7_8     | 24.2672 | -454.22  | 0.3114731 | 0 | 0           | 0 | 0            |
| cov3_4_6_7     | 24.2951 | -454.234 | 0.3112835 | 0 | 0           | 0 | 0            |
| cov3_4_7_11    | 24.3028 | -454.238 | 0.3115063 | 0 | 0           | 0 | 0            |
| cov3_4_6_8     | 24.38   | -454.277 | 0.311409  | 0 | 0           | 0 | 0            |
| cov3_4_8_11    | 24.3875 | -454.281 | 0.3116319 | 0 | 0           | 0 | 0            |
| cov1_2_6_9_11  | 24.8648 | -451.022 | 0.3161954 | 0 | -0.2233572  | 0 | -0.063704973 |
| cov1_2_6_10_11 | 24.9776 | -451.078 | 0.3164053 | 0 | -0.2256244  | 0 | -0.062422369 |
| cov3_6_7_8     | 25.0602 | -454.617 | 0.3153004 | 0 | 0           | 0 | 0            |
| cov3_6_7_11    | 25.1037 | -454.639 | 0.3151476 | 0 | 0           | 0 | 0            |
| cov1_5_6_9_11  | 25.1456 | -451.162 | 0.3172582 | 0 | -0.32442084 | 0 | 0            |
| cov3_6_8_11    | 25.1897 | -454.682 | 0.3152773 | 0 | 0           | 0 | 0            |
| cov1_5_6_10_11 | 25.229  | -451.204 | 0.3174805 | 0 | -0.32628367 | 0 | 0            |
| cov1_2_5_6_9   | 25.237  | -451.208 | 0.3164047 | 0 | -0.24357115 | 0 | -0.061363765 |
| cov3_7_8_11    | 25.2486 | -454.711 | 0.3152685 | 0 | 0           | 0 | 0            |
| cov1_2_5_6_11  | 25.3027 | -451.241 | 0.3222435 | 0 | -0.32602674 | 0 | -0.071669034 |
| cov1_2_5_6_10  | 25.3269 | -451.253 | 0.3166353 | 0 | -0.24651547 | 0 | -0.0604812   |
| cov1_3_6_9_11  | 25.3592 | -451.269 | 0.313834  | 0 | -0.27389171 | 0 | 0            |
| cov1_2_4_6_9   | 25.3686 | -451.274 | 0.3159522 | 0 | -0.19817831 | 0 | -0.081919112 |
| cov1_3_6_10_11 | 25.4543 | -451.316 | 0.3140705 | 0 | -0.27503432 | 0 | 0            |
| cov1_2_4_6_10  | 25.4606 | -451.32  | 0.3161748 | 0 | -0.20066125 | 0 | -0.081033939 |
| cov1_6_9_10_11 | 25.466  | -451.322 | 0.3151017 | 0 | -0.27129568 | 0 | 0            |
| cov1_4_6_9_11  | 25.4661 | -451.322 | 0.3152605 | 0 | -0.27401606 | 0 | 0            |
| cov1_6_7_9_11  | 25.4686 | -451.324 | 0.3151393 | 0 | -0.27066193 | 0 | 0            |
| cov1_6_8_9_11  | 25.4688 | -451.324 | 0.3151367 | 0 | -0.2707326  | 0 | 0            |
| cov1_2_6_7_9   | 25.5203 | -451.35  | 0.3146083 | 0 | -0.18877332 | 0 | -0.058699748 |
| cov1_2_6_8_9   | 25.522  | -451.35  | 0.3146059 | 0 | -0.18904737 | 0 | -0.058696348 |
| cov1_4_6_10_11 | 25.5529 | -451.366 | 0.3154871 | 0 | -0.27569378 | 0 | 0            |
| cov1_6_7_10_11 | 25.5566 | -451.368 | 0.315343  | 0 | -0.27186519 | 0 | 0            |

|                |         |          |           |   |             |   |              |
|----------------|---------|----------|-----------|---|-------------|---|--------------|
| cov1_6_8_10_11 | 25.5567 | -451.368 | 0.3153403 | 0 | -0.27193687 | 0 | 0            |
| cov1_2_3_6_9   | 25.5755 | -451.377 | 0.3134903 | 0 | -0.19097137 | 0 | -0.057892426 |
| cov1_2_6_9_10  | 25.5894 | -451.384 | 0.3140486 | 0 | -0.19121516 | 0 | -0.058012569 |
| cov1_2_6_7_10  | 25.6166 | -451.398 | 0.3148211 | 0 | -0.19144855 | 0 | -0.057422858 |
| cov1_2_6_8_10  | 25.6182 | -451.398 | 0.3148185 | 0 | -0.19172092 | 0 | -0.057419407 |
| cov1_4_5_6_9   | 25.6292 | -451.404 | 0.3151595 | 0 | -0.29399652 | 0 | 0            |
| cov1_2_3_6_10  | 25.673  | -451.426 | 0.3137318 | 0 | -0.19361989 | 0 | -0.056647046 |
| cov1_4_5_6_10  | 25.7094 | -451.444 | 0.3153813 | 0 | -0.29588158 | 0 | 0            |
| cov1_5_6_7_9   | 25.7449 | -451.462 | 0.3157923 | 0 | -0.28546457 | 0 | 0            |
| cov1_5_6_8_9   | 25.7465 | -451.463 | 0.3157887 | 0 | -0.28570354 | 0 | 0            |
| cov1_3_5_6_9   | 25.7941 | -451.486 | 0.3157781 | 0 | -0.29064977 | 0 | 0            |
| cov1_5_6_9_10  | 25.7985 | -451.489 | 0.3153468 | 0 | -0.28759816 | 0 | 0            |
| cov1_3_6_7_9   | 25.8078 | -451.493 | 0.3119332 | 0 | -0.23123063 | 0 | 0            |
| cov1_3_6_8_9   | 25.8158 | -451.497 | 0.3119673 | 0 | -0.23203633 | 0 | 0            |
| cov1_5_6_7_10  | 25.8181 | -451.498 | 0.3159987 | 0 | -0.28723048 | 0 | 0            |
| cov1_5_6_8_10  | 25.8196 | -451.499 | 0.315995  | 0 | -0.28746789 | 0 | 0            |
| cov1_4_5_6_11  | 25.8406 | -451.51  | 0.3205891 | 0 | -0.38174456 | 0 | 0            |
| cov1_2_4_6_11  | 25.8597 | -451.519 | 0.3228823 | 0 | -0.24964433 | 0 | -0.11409146  |
| cov1_3_5_6_10  | 25.8657 | -451.522 | 0.3160286 | 0 | -0.29268235 | 0 | 0            |
| cov1_3_6_7_10  | 25.8948 | -451.537 | 0.3121805 | 0 | -0.232836   | 0 | 0            |
| cov1_3_6_8_10  | 25.9025 | -451.541 | 0.3122141 | 0 | -0.23363168 | 0 | 0            |
| cov3_4_5_11    | 25.9648 | -455.069 | 0.3145158 | 0 | 0           | 0 | 0            |
| cov3_4_6_11    | 25.9805 | -455.077 | 0.3152904 | 0 | 0           | 0 | 0            |
| cov3_4_5_6     | 25.9903 | -455.082 | 0.3147781 | 0 | 0           | 0 | 0            |
| cov1_6_7_9_10  | 26.0296 | -451.604 | 0.3137787 | 0 | -0.23564576 | 0 | 0            |
| cov1_6_8_9_10  | 26.0312 | -451.605 | 0.3137709 | 0 | -0.23590702 | 0 | 0            |
| cov1_4_6_7_9   | 26.0327 | -451.606 | 0.3139641 | 0 | -0.2383523  | 0 | 0            |
| cov1_4_6_8_9   | 26.0343 | -451.607 | 0.3139592 | 0 | -0.2385762  | 0 | 0            |
| cov1_6_7_8_9   | 26.036  | -451.607 | 0.3137594 | 0 | -0.23510617 | 0 | 0            |
| cov1_3_5_6_11  | 26.0529 | -451.616 | 0.3203889 | 0 | -0.37387614 | 0 | 0            |
| cov1_5_6_7_11  | 26.0647 | -451.622 | 0.3210743 | 0 | -0.3766974  | 0 | 0            |
| cov1_5_6_8_11  | 26.0648 | -451.622 | 0.3210719 | 0 | -0.37677972 | 0 | 0            |
| cov1_3_6_9_10  | 26.0715 | -451.625 | 0.3126423 | 0 | -0.23705872 | 0 | 0            |
| cov1_3_4_6_9   | 26.0771 | -451.628 | 0.3124992 | 0 | -0.23559621 | 0 | 0            |
| cov1_2_5_6_7   | 26.0828 | -451.631 | 0.3206156 | 0 | -0.28724875 | 0 | -0.066208827 |
| cov1_2_5_6_8   | 26.0847 | -451.632 | 0.3206121 | 0 | -0.28754162 | 0 | -0.066204481 |
| cov1_4_6_9_10  | 26.092  | -451.635 | 0.3133325 | 0 | -0.23859582 | 0 | 0            |
| cov3_5_6_11    | 26.0969 | -455.135 | 0.3153797 | 0 | 0           | 0 | 0            |
| cov1_4_6_7_10  | 26.1051 | -451.642 | 0.314191  | 0 | -0.24033763 | 0 | 0            |
| cov1_4_6_8_10  | 26.1068 | -451.643 | 0.3141855 | 0 | -0.24056303 | 0 | 0            |
| cov1_6_7_8_10  | 26.1096 | -451.644 | 0.3139629 | 0 | -0.23673884 | 0 | 0            |
| cov1_2_3_5_6   | 26.1477 | -451.663 | 0.32091   | 0 | -0.29600147 | 0 | -0.066500727 |
| cov1_3_4_6_10  | 26.1533 | -451.666 | 0.3128022 | 0 | -0.23788886 | 0 | 0            |
| cov1_2_4_5_6   | 26.166  | -451.672 | 0.3200755 | 0 | -0.29062444 | 0 | -0.066276156 |
| cov4_6_7_8     | 26.27   | -455.222 | 0.3205582 | 0 | 0           | 0 | 0            |
| cov5_6_7_8     | 26.2928 | -455.233 | 0.3206118 | 0 | 0           | 0 | 0            |
| cov4_5_6_7     | 26.3032 | -455.238 | 0.320493  | 0 | 0           | 0 | 0            |

|                |         |          |           |   |             |   |              |
|----------------|---------|----------|-----------|---|-------------|---|--------------|
| cov4_6_7_11    | 26.3037 | -455.239 | 0.3203642 | 0 | 0           | 0 | 0            |
| cov4_5_6_8     | 26.3221 | -455.248 | 0.3204535 | 0 | 0           | 0 | 0            |
| cov4_6_8_11    | 26.3235 | -455.248 | 0.3203332 | 0 | 0           | 0 | 0            |
| cov5_6_7_11    | 26.329  | -455.251 | 0.3204641 | 0 | 0           | 0 | 0            |
| cov5_6_8_11    | 26.3506 | -455.262 | 0.3204361 | 0 | 0           | 0 | 0            |
| cov4_5_7_11    | 26.3629 | -455.268 | 0.3202362 | 0 | 0           | 0 | 0            |
| cov5_7_8_11    | 26.3641 | -455.269 | 0.3203835 | 0 | 0           | 0 | 0            |
| cov4_7_8_11    | 26.3815 | -455.277 | 0.3203077 | 0 | 0           | 0 | 0            |
| cov4_5_8_11    | 26.3826 | -455.278 | 0.3202087 | 0 | 0           | 0 | 0            |
| cov4_5_7_8     | 26.3933 | -455.283 | 0.3206912 | 0 | 0           | 0 | 0            |
| cov6_7_8_11    | 26.4019 | -455.288 | 0.3209904 | 0 | 0           | 0 | 0            |
| cov1_2_3_6_11  | 26.4581 | -451.818 | 0.3170727 | 0 | -0.23904367 | 0 | -0.066316411 |
| cov4_5_6_11    | 26.5255 | -455.35  | 0.3195936 | 0 | 0           | 0 | 0            |
| cov1_4_5_6_7   | 26.5324 | -451.856 | 0.3190881 | 0 | -0.34342897 | 0 | 0            |
| cov1_4_5_6_8   | 26.5333 | -451.856 | 0.3190842 | 0 | -0.34362819 | 0 | 0            |
| cov1_3_4_5_6   | 26.5642 | -451.871 | 0.3188169 | 0 | -0.3466302  | 0 | 0            |
| cov1_3_6_7_11  | 26.5881 | -451.883 | 0.3144754 | 0 | -0.27337873 | 0 | 0            |
| cov1_3_6_8_11  | 26.5994 | -451.889 | 0.3145286 | 0 | -0.27460473 | 0 | 0            |
| cov1_2_4_6_7   | 26.6001 | -451.889 | 0.3215637 | 0 | -0.2079126  | 0 | -0.10864521  |
| cov1_2_4_6_8   | 26.6043 | -451.891 | 0.3215558 | 0 | -0.20839525 | 0 | -0.1085686   |
| cov1_3_5_6_7   | 26.689  | -451.934 | 0.3180098 | 0 | -0.31932086 | 0 | 0            |
| cov1_3_5_6_8   | 26.6939 | -451.936 | 0.3180744 | 0 | -0.32058639 | 0 | 0            |
| cov1_2_3_6_7   | 26.7077 | -451.943 | 0.3139511 | 0 | -0.18853095 | 0 | -0.059681197 |
| cov1_2_3_6_8   | 26.7238 | -451.951 | 0.3140068 | 0 | -0.18983708 | 0 | -0.059709863 |
| cov1_5_6_7_8   | 26.7368 | -451.958 | 0.3196915 | 0 | -0.33726659 | 0 | 0            |
| cov1_2_6_7_11  | 26.8288 | -452.004 | 0.3202299 | 0 | -0.23249685 | 0 | -0.067445298 |
| cov1_2_6_8_11  | 26.829  | -452.004 | 0.3202299 | 0 | -0.23263018 | 0 | -0.067447269 |
| cov1_2_3_4_6   | 26.8463 | -452.013 | 0.3203398 | 0 | -0.21131313 | 0 | -0.10512618  |
| cov1_3_4_6_11  | 27.0647 | -452.122 | 0.3169241 | 0 | -0.29915263 | 0 | 0            |
| cov1_3_4_6_7   | 27.2367 | -452.208 | 0.3134941 | 0 | -0.23929594 | 0 | 0            |
| cov1_3_6_7_8   | 27.2403 | -452.21  | 0.3131683 | 0 | -0.23555681 | 0 | 0            |
| cov1_3_4_6_8   | 27.2529 | -452.216 | 0.3135609 | 0 | -0.24074429 | 0 | 0            |
| cov2_4_5_6_9   | 27.2875 | -452.233 | 0.3158283 | 0 | 0           | 0 | -0.14542428  |
| cov1_4_6_7_11  | 27.29   | -452.234 | 0.3201565 | 0 | -0.30292027 | 0 | 0            |
| cov1_4_6_8_11  | 27.2907 | -452.235 | 0.3201548 | 0 | -0.3031057  | 0 | 0            |
| cov2_4_5_6_10  | 27.428  | -452.303 | 0.3161139 | 0 | 0           | 0 | -0.14526737  |
| cov1_6_7_8_11  | 27.505  | -452.342 | 0.3192733 | 0 | -0.28330583 | 0 | 0            |
| cov2_3_6_7_9   | 27.5165 | -452.348 | 0.3148101 | 0 | 0           | 0 | -0.12083811  |
| cov2_3_6_8_9   | 27.5469 | -452.363 | 0.3148812 | 0 | 0           | 0 | -0.12123871  |
| cov1_2_6_7_8   | 27.5699 | -452.374 | 0.3185496 | 0 | -0.19634175 | 0 | -0.062192546 |
| cov2_5_6_9_11  | 27.6004 | -452.39  | 0.3155409 | 0 | 0           | 0 | -0.11819613  |
| cov1_2_5_9_11  | 27.6094 | -452.394 | 0.3194545 | 0 | -0.13686205 | 0 | -0.061483115 |
| cov2_5_6_7_9   | 27.6541 | -452.416 | 0.3152921 | 0 | 0           | 0 | -0.11166981  |
| cov2_5_6_8_9   | 27.663  | -452.421 | 0.3152681 | 0 | 0           | 0 | -0.11174477  |
| cov1_2_5_10_11 | 27.6727 | -452.426 | 0.3196926 | 0 | -0.14052124 | 0 | -0.061055456 |
| cov2_3_6_7_10  | 27.6816 | -452.43  | 0.3151333 | 0 | 0           | 0 | -0.12066295  |
| cov1_2_4_9_11  | 27.6907 | -452.435 | 0.3192365 | 0 | -0.08318843 | 0 | -0.09246932  |

|                |         |          |           |   |              |   |              |
|----------------|---------|----------|-----------|---|--------------|---|--------------|
| cov2_4_6_7_9   | 27.6915 | -452.435 | 0.3185718 | 0 | 0            | 0 | -0.14268093  |
| cov2_4_6_8_9   | 27.7044 | -452.442 | 0.318534  | 0 | 0            | 0 | -0.14261923  |
| cov2_3_6_8_10  | 27.7124 | -452.446 | 0.3152061 | 0 | 0            | 0 | -0.12106227  |
| cov2_3_5_6_9   | 27.7151 | -452.447 | 0.3129747 | 0 | 0            | 0 | -0.1086037   |
| cov2_4_6_9_11  | 27.7221 | -452.45  | 0.3185932 | 0 | 0            | 0 | -0.14722774  |
| cov2_6_7_9_11  | 27.7326 | -452.456 | 0.3176844 | 0 | 0            | 0 | -0.12878422  |
| cov2_6_8_9_11  | 27.741  | -452.46  | 0.3176718 | 0 | 0            | 0 | -0.12895862  |
| cov1_2_4_10_11 | 27.7618 | -452.47  | 0.3194503 | 0 | -0.085661823 | 0 | -0.092118586 |
| cov2_3_6_9_11  | 27.773  | -452.476 | 0.3165997 | 0 | 0            | 0 | -0.13070683  |
| cov2_5_6_10_11 | 27.7737 | -452.476 | 0.3158102 | 0 | 0            | 0 | -0.11728401  |
| cov2_5_6_9_10  | 27.7845 | -452.482 | 0.3145619 | 0 | 0            | 0 | -0.11176366  |
| cov2_6_7_8_9   | 27.7893 | -452.484 | 0.3169472 | 0 | 0            | 0 | -0.12264864  |
| cov2_6_9_10_11 | 27.8101 | -452.494 | 0.3173363 | 0 | 0            | 0 | -0.13056192  |
| cov2_5_6_7_10  | 27.8124 | -452.496 | 0.3155877 | 0 | 0            | 0 | -0.11099021  |
| cov2_6_7_9_10  | 27.8125 | -452.496 | 0.3169974 | 0 | 0            | 0 | -0.12330282  |
| cov2_5_6_8_10  | 27.8214 | -452.5   | 0.3155621 | 0 | 0            | 0 | -0.11106552  |
| cov2_6_8_9_10  | 27.8228 | -452.501 | 0.3169777 | 0 | 0            | 0 | -0.12343223  |
| cov2_4_6_7_10  | 27.8487 | -452.514 | 0.3189528 | 0 | 0            | 0 | -0.14302244  |
| cov2_4_6_8_10  | 27.8619 | -452.52  | 0.3189159 | 0 | 0            | 0 | -0.14295436  |
| cov2_4_6_9_10  | 27.8651 | -452.522 | 0.3174501 | 0 | 0            | 0 | -0.13939262  |
| cov2_3_4_6_9   | 27.8672 | -452.523 | 0.3174628 | 0 | 0            | 0 | -0.13917325  |
| cov2_3_5_6_10  | 27.8762 | -452.527 | 0.3132819 | 0 | 0            | 0 | -0.1079869   |
| cov2_4_6_10_11 | 27.8927 | -452.536 | 0.3189355 | 0 | 0            | 0 | -0.14729338  |
| cov2_6_7_10_11 | 27.9054 | -452.542 | 0.3179998 | 0 | 0            | 0 | -0.1281958   |
| cov2_6_8_10_11 | 27.914  | -452.546 | 0.3179882 | 0 | 0            | 0 | -0.12837232  |
| cov1_4_6_7_8   | 27.9238 | -452.551 | 0.3188072 | 0 | -0.26601818  | 0 | 0            |
| cov2_3_6_9_10  | 27.9316 | -452.555 | 0.3157851 | 0 | 0            | 0 | -0.12336575  |
| cov2_3_6_10_11 | 27.9516 | -452.565 | 0.3169223 | 0 | 0            | 0 | -0.13017328  |
| cov2_6_7_8_10  | 27.9524 | -452.566 | 0.3172889 | 0 | 0            | 0 | -0.12235859  |
| cov1_2_4_5_11  | 27.9716 | -452.575 | 0.3223713 | 0 | -0.16797689  | 0 | -0.077306218 |
| cov1_2_3_5_11  | 28.0013 | -452.59  | 0.3216452 | 0 | -0.17626678  | 0 | -0.064796359 |
| cov1_2_5_7_11  | 28.0032 | -452.591 | 0.322073  | 0 | -0.17701887  | 0 | -0.065015349 |
| cov1_2_5_8_11  | 28.0045 | -452.592 | 0.3220495 | 0 | -0.17746033  | 0 | -0.065022052 |
| cov2_3_4_6_10  | 28.027  | -452.603 | 0.3178744 | 0 | 0            | 0 | -0.13962382  |
| cov1_2_3_9_11  | 28.0391 | -452.609 | 0.31515   | 0 | -0.06952595  | 0 | -0.056770621 |
| cov1_4_5_9_11  | 28.0823 | -452.63  | 0.318038  | 0 | -0.18362128  | 0 | 0            |
| cov1_2_3_10_11 | 28.1223 | -452.65  | 0.315355  | 0 | -0.072014894 | 0 | -0.055869788 |
| cov1_4_5_10_11 | 28.1387 | -452.659 | 0.3182534 | 0 | -0.18639643  | 0 | 0            |
| cov1_3_5_9_11  | 28.159  | -452.669 | 0.3174628 | 0 | -0.17763409  | 0 | 0            |
| cov1_2_7_9_11  | 28.1634 | -452.671 | 0.3166935 | 0 | -0.064416316 | 0 | -0.057217291 |
| cov1_2_8_9_11  | 28.1655 | -452.672 | 0.316665  | 0 | -0.064772904 | 0 | -0.057216228 |
| cov1_5_9_10_11 | 28.1669 | -452.673 | 0.3180568 | 0 | -0.18137616  | 0 | 0            |
| cov1_2_9_10_11 | 28.1675 | -452.673 | 0.3165972 | 0 | -0.065581462 | 0 | -0.057196004 |
| cov1_5_7_9_11  | 28.1679 | -452.673 | 0.3180815 | 0 | -0.18014493  | 0 | 0            |
| cov1_5_8_9_11  | 28.1687 | -452.674 | 0.3180564 | 0 | -0.18058389  | 0 | 0            |
| cov1_3_5_10_11 | 28.2144 | -452.697 | 0.3177079 | 0 | -0.18044751  | 0 | 0            |
| cov1_5_7_10_11 | 28.222  | -452.7   | 0.3182873 | 0 | -0.18265111  | 0 | 0            |



|                |         |          |           |   |              |   |              |
|----------------|---------|----------|-----------|---|--------------|---|--------------|
| cov1_5_8_10_11 | 28.2229 | -452.701 | 0.3182621 | 0 | -0.18308813  | 0 | 0            |
| cov1_2_7_10_11 | 28.2423 | -452.71  | 0.3168833 | 0 | -0.066968524 | 0 | -0.056215915 |
| cov1_2_8_10_11 | 28.2445 | -452.712 | 0.3168546 | 0 | -0.067324903 | 0 | -0.056213921 |
| cov2_4_5_9_11  | 28.2446 | -452.712 | 0.3187288 | 0 | 0            | 0 | -0.12589014  |
| cov2_3_7_9_11  | 28.2569 | -452.718 | 0.3150264 | 0 | 0            | 0 | -0.091230684 |
| cov2_3_8_9_11  | 28.2907 | -452.735 | 0.3151129 | 0 | 0            | 0 | -0.091597515 |
| cov2_4_7_9_11  | 28.2999 | -452.739 | 0.319701  | 0 | 0            | 0 | -0.12664155  |
| cov2_4_8_9_11  | 28.3116 | -452.745 | 0.3196584 | 0 | 0            | 0 | -0.12660524  |
| cov1_3_7_9_11  | 28.315  | -452.747 | 0.3132319 | 0 | -0.10825964  | 0 | 0            |
| cov1_3_8_9_11  | 28.3418 | -452.76  | 0.3133025 | 0 | -0.10883748  | 0 | 0            |
| cov2_4_5_10_11 | 28.3505 | -452.765 | 0.3189607 | 0 | 0            | 0 | -0.12647936  |
| cov1_2_4_7_11  | 28.3669 | -452.773 | 0.3230281 | 0 | -0.10314817  | 0 | -0.11090379  |
| cov2_3_4_9_11  | 28.3734 | -452.776 | 0.3186896 | 0 | 0            | 0 | -0.12443095  |
| cov2_4_9_10_11 | 28.3742 | -452.776 | 0.3191361 | 0 | 0            | 0 | -0.12666579  |
| cov2_3_7_10_11 | 28.3752 | -452.777 | 0.315292  | 0 | 0            | 0 | -0.091958813 |
| cov1_2_4_8_11  | 28.3761 | -452.777 | 0.3229918 | 0 | -0.10350389  | 0 | -0.11077482  |
| cov1_3_7_10_11 | 28.3857 | -452.782 | 0.313437  | 0 | -0.10991753  | 0 | 0            |
| cov2_3_8_10_11 | 28.4094 | -452.794 | 0.3153797 | 0 | 0            | 0 | -0.09231992  |
| cov1_2_3_4_11  | 28.41   | -452.794 | 0.3216042 | 0 | -0.10713302  | 0 | -0.10580897  |
| cov1_3_8_10_11 | 28.4122 | -452.795 | 0.3135079 | 0 | -0.1104908   | 0 | 0            |
| cov2_4_7_10_11 | 28.4139 | -452.796 | 0.3199977 | 0 | 0            | 0 | -0.12756555  |
| cov2_4_8_10_11 | 28.4259 | -452.802 | 0.319955  | 0 | 0            | 0 | -0.12752736  |
| cov3_5_6_7_9   | 28.4661 | -452.822 | 0.3051756 | 0 | 0            | 0 | 0            |
| cov1_3_4_5_11  | 28.4822 | -452.83  | 0.3197191 | 0 | -0.22450552  | 0 | 0            |
| cov2_3_4_10_11 | 28.4932 | -452.836 | 0.319015  | 0 | 0            | 0 | -0.125539    |
| cov1_4_5_8_11  | 28.5026 | -452.841 | 0.3205505 | 0 | -0.23034673  | 0 | 0            |
| cov1_4_5_7_11  | 28.5038 | -452.841 | 0.3205757 | 0 | -0.22989336  | 0 | 0            |
| cov1_3_4_9_11  | 28.51   | -452.844 | 0.3143925 | 0 | -0.12032872  | 0 | 0            |
| cov1_3_9_10_11 | 28.5187 | -452.849 | 0.3140198 | 0 | -0.11501911  | 0 | 0            |
| cov3_5_6_8_9   | 28.5262 | -452.852 | 0.3052667 | 0 | 0            | 0 | 0            |
| cov2_7_8_9_11  | 28.5386 | -452.859 | 0.3173314 | 0 | 0            | 0 | -0.092701611 |
| cov2_3_9_10_11 | 28.5442 | -452.861 | 0.316069  | 0 | 0            | 0 | -0.096222084 |
| cov2_3_5_9_11  | 28.5444 | -452.862 | 0.3158477 | 0 | 0            | 0 | -0.094075571 |
| cov1_3_4_10_11 | 28.5752 | -452.877 | 0.3146447 | 0 | -0.12254738  | 0 | 0            |
| cov1_3_5_7_11  | 28.583  | -452.881 | 0.3191416 | 0 | -0.20912096  | 0 | 0            |
| cov2_5_7_9_11  | 28.5843 | -452.881 | 0.3176629 | 0 | 0            | 0 | -0.09605824  |
| cov2_7_9_10_11 | 28.5895 | -452.884 | 0.3173907 | 0 | 0            | 0 | -0.092891647 |
| cov1_5_7_8_11  | 28.5907 | -452.885 | 0.3208217 | 0 | -0.22726285  | 0 | 0            |
| cov2_5_8_9_11  | 28.5918 | -452.885 | 0.3176321 | 0 | 0            | 0 | -0.096189385 |
| cov1_3_5_8_11  | 28.5945 | -452.887 | 0.3193194 | 0 | -0.21173294  | 0 | 0            |
| cov2_8_9_10_11 | 28.5967 | -452.888 | 0.3173674 | 0 | 0            | 0 | -0.093112087 |
| cov1_4_7_9_11  | 28.5989 | -452.889 | 0.3161564 | 0 | -0.12255879  | 0 | 0            |
| cov1_4_8_9_11  | 28.6021 | -452.89  | 0.3161214 | 0 | -0.12278622  | 0 | 0            |
| cov1_7_8_9_11  | 28.6042 | -452.891 | 0.3155238 | 0 | -0.10988099  | 0 | 0            |
| cov1_4_9_10_11 | 28.6061 | -452.892 | 0.3159885 | 0 | -0.12351787  | 0 | 0            |
| cov1_2_5_7_9   | 28.6063 | -452.892 | 0.3175873 | 0 | -0.082959813 | 0 | -0.054750599 |
| cov3_5_6_7_10  | 28.6195 | -452.899 | 0.3055112 | 0 | 0            | 0 | 0            |

|                |         |          |           |   |              |   |              |
|----------------|---------|----------|-----------|---|--------------|---|--------------|
| cov1_2_5_8_9   | 28.6196 | -452.899 | 0.3175484 | 0 | -0.083136081 | 0 | -0.054705926 |
| cov2_5_9_10_11 | 28.62   | -452.899 | 0.3173704 | 0 | 0            | 0 | -0.097439509 |
| cov1_2_3_7_11  | 28.621  | -452.9   | 0.3153929 | 0 | -0.079212843 | 0 | -0.058401193 |
| cov1_7_9_10_11 | 28.6487 | -452.914 | 0.3155784 | 0 | -0.11019222  | 0 | 0            |
| cov1_8_9_10_11 | 28.6508 | -452.915 | 0.3155501 | 0 | -0.11054531  | 0 | 0            |
| cov2_7_8_10_11 | 28.6555 | -452.917 | 0.3176037 | 0 | 0            | 0 | -0.093267231 |
| cov1_4_7_10_11 | 28.6568 | -452.918 | 0.3163536 | 0 | -0.12451265  | 0 | 0            |
| cov1_2_4_7_9   | 28.6597 | -452.919 | 0.317637  | 0 | -0.030188566 | 0 | -0.085287155 |
| cov1_4_8_10_11 | 28.6601 | -452.919 | 0.3163184 | 0 | -0.12474062  | 0 | 0            |
| cov1_2_5_7_10  | 28.6604 | -452.92  | 0.3177926 | 0 | -0.086187862 | 0 | -0.054236796 |
| cov1_2_3_8_11  | 28.6616 | -452.92  | 0.3154865 | 0 | -0.079973701 | 0 | -0.058447294 |
| cov1_7_8_10_11 | 28.666  | -452.922 | 0.3157071 | 0 | -0.11148096  | 0 | 0            |
| cov2_3_5_10_11 | 28.6673 | -452.923 | 0.3160794 | 0 | 0            | 0 | -0.094231773 |
| cov2_3_4_7_9   | 28.6718 | -452.925 | 0.3159011 | 0 | 0            | 0 | -0.091557242 |
| cov1_2_5_8_10  | 28.6737 | -452.926 | 0.3177537 | 0 | -0.086362487 | 0 | -0.054190287 |
| cov3_5_6_8_10  | 28.6793 | -452.929 | 0.3056002 | 0 | 0            | 0 | 0            |
| cov1_2_4_8_9   | 28.6794 | -452.929 | 0.3175757 | 0 | -0.030219076 | 0 | -0.085023229 |
| cov1_2_3_5_9   | 28.6857 | -452.932 | 0.318015  | 0 | -0.092192306 | 0 | -0.055082672 |
| cov1_2_4_5_9   | 28.6978 | -452.938 | 0.3170983 | 0 | -0.076959553 | 0 | -0.062826079 |
| cov2_5_7_10_11 | 28.7026 | -452.941 | 0.3178882 | 0 | 0            | 0 | -0.096061926 |
| cov2_3_4_8_9   | 28.7082 | -452.943 | 0.3160224 | 0 | 0            | 0 | -0.092279399 |
| cov2_5_8_10_11 | 28.7103 | -452.945 | 0.3178567 | 0 | 0            | 0 | -0.096190627 |
| cov1_2_5_9_10  | 28.7131 | -452.946 | 0.3169505 | 0 | -0.085650554 | 0 | -0.054395077 |
| cov1_2_4_7_10  | 28.7171 | -452.948 | 0.3178336 | 0 | -0.032760587 | 0 | -0.084787899 |
| cov2_4_7_8_9   | 28.722  | -452.95  | 0.3180308 | 0 | 0            | 0 | -0.10343952  |
| cov1_2_4_8_10  | 28.7368 | -452.958 | 0.3177719 | 0 | -0.032791761 | 0 | -0.08451997  |
| cov1_2_3_5_10  | 28.738  | -452.958 | 0.3182412 | 0 | -0.095491507 | 0 | -0.054570364 |
| cov1_2_4_5_10  | 28.7517 | -452.965 | 0.3172946 | 0 | -0.08008917  | 0 | -0.062292684 |
| cov2_3_4_7_10  | 28.7531 | -452.966 | 0.3161955 | 0 | 0            | 0 | -0.093090072 |
| cov2_4_5_7_9   | 28.7723 | -452.975 | 0.3179428 | 0 | 0            | 0 | -0.10232356  |
| cov2_4_7_9_10  | 28.7774 | -452.978 | 0.3180839 | 0 | 0            | 0 | -0.10352654  |
| cov2_3_7_8_9   | 28.7787 | -452.979 | 0.3130002 | 0 | 0            | 0 | -0.061161584 |
| cov2_3_4_8_10  | 28.7894 | -452.984 | 0.3163171 | 0 | 0            | 0 | -0.093799499 |
| cov2_4_5_8_9   | 28.7927 | -452.986 | 0.3178877 | 0 | 0            | 0 | -0.10211764  |
| cov2_4_8_9_10  | 28.7974 | -452.988 | 0.3180235 | 0 | 0            | 0 | -0.10327187  |
| cov2_4_7_8_10  | 28.8027 | -452.991 | 0.3183184 | 0 | 0            | 0 | -0.10478201  |
| cov1_2_3_7_9   | 28.8051 | -452.992 | 0.3126864 | 0 | -0.014456482 | 0 | -0.049877292 |
| cov2_3_5_7_9   | 28.8166 | -452.998 | 0.3139099 | 0 | 0            | 0 | -0.069109212 |
| cov2_3_7_9_10  | 28.8324 | -453.006 | 0.3130352 | 0 | 0            | 0 | -0.061212802 |
| cov1_2_3_8_9   | 28.8469 | -453.013 | 0.3127543 | 0 | -0.014682649 | 0 | -0.049854709 |
| cov2_4_5_7_10  | 28.8483 | -453.013 | 0.3181756 | 0 | 0            | 0 | -0.10323851  |
| cov2_3_5_6_7   | 28.8491 | -453.014 | 0.3138079 | 0 | 0            | 0 | -0.11162386  |
| cov1_2_3_4_9   | 28.8507 | -453.015 | 0.3172734 | 0 | -0.031629131 | 0 | -0.084518959 |
| cov2_3_5_8_9   | 28.8563 | -453.018 | 0.3140496 | 0 | 0            | 0 | -0.069893367 |
| cov2_3_4_6_7   | 28.858  | -453.018 | 0.3185692 | 0 | 0            | 0 | -0.14630123  |
| cov2_3_7_8_10  | 28.8613 | -453.02  | 0.31329   | 0 | 0            | 0 | -0.062606277 |
| cov2_4_5_8_10  | 28.8688 | -453.024 | 0.3181205 | 0 | 0            | 0 | -0.10303175  |

|               |         |          |           |   |              |   |              |
|---------------|---------|----------|-----------|---|--------------|---|--------------|
| cov2_3_6_7_11 | 28.8706 | -453.025 | 0.3168882 | 0 | 0            | 0 | -0.13040374  |
| cov1_2_4_9_10 | 28.8717 | -453.025 | 0.3163165 | 0 | -0.030295809 | 0 | -0.080582289 |
| cov1_2_3_7_10 | 28.8752 | -453.027 | 0.3128885 | 0 | -0.017108391 | 0 | -0.04911634  |
| cov2_3_8_9_10 | 28.8754 | -453.027 | 0.3131113 | 0 | 0            | 0 | -0.061374046 |
| cov2_3_5_7_10 | 28.9031 | -453.041 | 0.3140878 | 0 | 0            | 0 | -0.069527761 |
| cov2_3_4_6_8  | 28.9054 | -453.042 | 0.3187125 | 0 | 0            | 0 | -0.14727367  |
| cov1_2_3_4_10 | 28.9061 | -453.042 | 0.3174995 | 0 | -0.034314236 | 0 | -0.084041978 |
| cov2_3_5_6_8  | 28.9062 | -453.042 | 0.3139598 | 0 | 0            | 0 | -0.11251452  |
| cov1_2_3_8_10 | 28.9165 | -453.048 | 0.3129549 | 0 | -0.01734668  | 0 | -0.049081472 |
| cov2_3_6_8_11 | 28.9207 | -453.05  | 0.3169994 | 0 | 0            | 0 | -0.13104427  |
| cov2_3_5_8_10 | 28.9431 | -453.061 | 0.3142269 | 0 | 0            | 0 | -0.070298405 |
| cov2_3_6_7_8  | 28.9628 | -453.071 | 0.3161015 | 0 | 0            | 0 | -0.12324159  |
| cov2_5_7_8_9  | 28.9768 | -453.078 | 0.3167373 | 0 | 0            | 0 | -0.081373046 |
| cov2_3_4_5_9  | 28.9791 | -453.079 | 0.3174679 | 0 | 0            | 0 | -0.10202542  |
| cov2_3_4_9_10 | 28.9792 | -453.079 | 0.317498  | 0 | 0            | 0 | -0.10226774  |
| cov1_4_5_7_9  | 28.9877 | -453.083 | 0.316394  | 0 | -0.12828445  | 0 | 0            |
| cov2_4_5_9_10 | 28.9905 | -453.085 | 0.3167535 | 0 | 0            | 0 | -0.098616035 |
| cov1_4_5_8_9  | 28.9981 | -453.088 | 0.3163562 | 0 | -0.12847211  | 0 | 0            |
| cov1_5_7_8_9  | 29.0008 | -453.09  | 0.3164429 | 0 | -0.12517579  | 0 | 0            |
| cov1_2_5_7_8  | 29.0033 | -453.091 | 0.3202691 | 0 | -0.12505526  | 0 | -0.058420991 |
| cov1_3_5_7_9  | 29.0115 | -453.095 | 0.3149415 | 0 | -0.10893787  | 0 | 0            |
| cov1_2_4_5_7  | 29.0167 | -453.098 | 0.320716  | 0 | -0.11319972  | 0 | -0.070912536 |
| cov1_2_3_5_7  | 29.0219 | -453.1   | 0.3189691 | 0 | -0.11198551  | 0 | -0.057227767 |
| cov2_5_7_9_10 | 29.0313 | -453.105 | 0.3167929 | 0 | 0            | 0 | -0.081485108 |
| cov1_2_4_5_8  | 29.0325 | -453.106 | 0.320662  | 0 | -0.113779    | 0 | -0.070441893 |
| cov1_4_5_7_10 | 29.0353 | -453.107 | 0.3165824 | 0 | -0.13062801  | 0 | 0            |
| cov1_3_5_8_9  | 29.0354 | -453.107 | 0.3151431 | 0 | -0.11161481  | 0 | 0            |
| cov1_2_3_5_8  | 29.0443 | -453.111 | 0.3191667 | 0 | -0.11447486  | 0 | -0.057371508 |
| cov1_4_5_8_10 | 29.0456 | -453.112 | 0.3165443 | 0 | -0.13081442  | 0 | 0            |
| cov1_5_7_8_10 | 29.0461 | -453.112 | 0.3166214 | 0 | -0.12737205  | 0 | 0            |
| cov2_5_8_9_10 | 29.0465 | -453.113 | 0.3167527 | 0 | 0            | 0 | -0.081494218 |
| cov1_3_4_5_9  | 29.0481 | -453.113 | 0.3164277 | 0 | -0.13411     | 0 | 0            |
| cov1_5_7_9_10 | 29.0528 | -453.116 | 0.3164983 | 0 | -0.12536719  | 0 | 0            |
| cov1_4_5_9_10 | 29.055  | -453.117 | 0.3159012 | 0 | -0.13065992  | 0 | 0            |
| cov1_2_7_8_9  | 29.0571 | -453.118 | 0.3148528 | 0 | -0.01566237  | 0 | -0.050934948 |
| cov2_3_4_5_10 | 29.0578 | -453.118 | 0.3177029 | 0 | 0            | 0 | -0.10294359  |
| cov1_3_5_7_10 | 29.0603 | -453.119 | 0.3152061 | 0 | -0.1121339   | 0 | 0            |
| cov1_5_8_9_10 | 29.0654 | -453.122 | 0.3164596 | 0 | -0.12550553  | 0 | 0            |
| cov2_5_7_8_10 | 29.0686 | -453.124 | 0.316951  | 0 | 0            | 0 | -0.081728197 |
| cov2_3_4_7_11 | 29.0731 | -453.126 | 0.3194861 | 0 | 0            | 0 | -0.1358684   |
| cov1_3_5_8_10 | 29.0835 | -453.131 | 0.3154035 | 0 | -0.11475205  | 0 | 0            |
| cov1_3_7_8_11 | 29.0893 | -453.134 | 0.3142913 | 0 | -0.12611271  | 0 | 0            |
| cov2_7_8_9_10 | 29.0903 | -453.134 | 0.3152851 | 0 | 0            | 0 | -0.063297958 |
| cov1_3_4_5_10 | 29.0947 | -453.137 | 0.316647  | 0 | -0.13666207  | 0 | 0            |
| cov1_2_7_9_10 | 29.1082 | -453.143 | 0.3149056 | 0 | -0.016100031 | 0 | -0.050697943 |
| cov1_3_4_7_11 | 29.1087 | -453.144 | 0.3149546 | 0 | -0.13432169  | 0 | 0            |
| cov1_2_7_8_10 | 29.1192 | -453.149 | 0.3150333 | 0 | -0.018572367 | 0 | -0.049928824 |

|               |         |          |           |   |              |   |              |
|---------------|---------|----------|-----------|---|--------------|---|--------------|
| cov2_3_4_8_11 | 29.1196 | -453.149 | 0.3196487 | 0 | 0            | 0 | -0.13695062  |
| cov1_2_8_9_10 | 29.1226 | -453.151 | 0.3148634 | 0 | -0.016206773 | 0 | -0.050644778 |
| cov2_4_5_6_7  | 29.1228 | -453.151 | 0.3238151 | 0 | 0            | 0 | -0.1794012   |
| cov1_3_7_8_9  | 29.1243 | -453.152 | 0.3117754 | 0 | -0.056828952 | 0 | 0            |
| cov1_2_3_4_5  | 29.127  | -453.153 | 0.3211583 | 0 | -0.12888818  | 0 | -0.067428698 |
| cov1_3_5_9_10 | 29.136  | -453.157 | 0.3166724 | 0 | -0.13282581  | 0 | 0            |
| cov2_4_5_6_8  | 29.142  | -453.16  | 0.3237879 | 0 | 0            | 0 | -0.17945246  |
| cov1_3_4_8_11 | 29.1479 | -453.163 | 0.3150764 | 0 | -0.13553667  | 0 | 0            |
| cov2_3_5_9_10 | 29.1657 | -453.172 | 0.3158299 | 0 | 0            | 0 | -0.081023346 |
| cov1_3_4_7_9  | 29.1771 | -453.178 | 0.3119573 | 0 | -0.058645027 | 0 | 0            |
| cov1_3_7_9_10 | 29.1779 | -453.178 | 0.3118347 | 0 | -0.056981276 | 0 | 0            |
| cov1_3_7_8_10 | 29.1833 | -453.181 | 0.3119821 | 0 | -0.058743353 | 0 | 0            |
| cov1_2_3_4_7  | 29.2179 | -453.198 | 0.3177976 | 0 | -0.043399499 | 0 | -0.088470564 |
| cov1_3_4_8_9  | 29.218  | -453.198 | 0.3120547 | 0 | -0.059294578 | 0 | 0            |
| cov1_3_8_9_10 | 29.2192 | -453.199 | 0.3119017 | 0 | -0.057199015 | 0 | 0            |
| cov1_2_3_9_10 | 29.2199 | -453.199 | 0.3135754 | 0 | -0.017496397 | 0 | -0.049673632 |
| cov1_3_4_7_10 | 29.2348 | -453.207 | 0.3122162 | 0 | -0.061273224 | 0 | 0            |
| cov2_3_7_8_11 | 29.244  | -453.211 | 0.3163769 | 0 | 0            | 0 | -0.10396719  |
| cov2_4_5_6_11 | 29.2449 | -453.212 | 0.3237828 | 0 | 0            | 0 | -0.18751627  |
| cov2_4_6_7_11 | 29.2529 | -453.216 | 0.3247173 | 0 | 0            | 0 | -0.17830024  |
| cov1_2_3_4_8  | 29.2628 | -453.221 | 0.3179378 | 0 | -0.043999048 | 0 | -0.089044615 |
| cov2_4_6_8_11 | 29.2696 | -453.224 | 0.3246922 | 0 | 0            | 0 | -0.17837189  |
| cov1_3_4_8_10 | 29.2749 | -453.227 | 0.3123132 | 0 | -0.061915554 | 0 | 0            |
| cov2_3_5_7_11 | 29.2838 | -453.231 | 0.3160613 | 0 | 0            | 0 | -0.10099718  |
| cov2_4_6_7_8  | 29.3236 | -453.251 | 0.323943  | 0 | 0            | 0 | -0.17181312  |
| cov3_4_6_7_9  | 29.3337 | -453.256 | 0.308629  | 0 | 0            | 0 | 0            |
| cov2_3_5_8_11 | 29.3392 | -453.259 | 0.3162349 | 0 | 0            | 0 | -0.10199932  |
| cov3_5_7_9_11 | 29.3488 | -453.264 | 0.3090719 | 0 | 0            | 0 | 0            |
| cov1_2_4_7_8  | 29.3761 | -453.277 | 0.3211271 | 0 | -0.051844957 | 0 | -0.10319738  |
| cov3_4_6_8_9  | 29.3855 | -453.282 | 0.308712  | 0 | 0            | 0 | 0            |
| cov1_4_7_8_9  | 29.3887 | -453.284 | 0.314642  | 0 | -0.07229958  | 0 | 0            |
| cov2_4_5_7_11 | 29.3952 | -453.287 | 0.3242746 | 0 | 0            | 0 | -0.16248336  |
| cov3_5_8_9_11 | 29.4088 | -453.294 | 0.3091775 | 0 | 0            | 0 | 0            |
| cov1_3_4_5_7  | 29.41   | -453.294 | 0.3174291 | 0 | -0.15720655  | 0 | 0            |
| cov1_4_5_7_8  | 29.4111 | -453.295 | 0.3190548 | 0 | -0.1750838   | 0 | 0            |
| cov2_4_5_8_11 | 29.4131 | -453.296 | 0.3242435 | 0 | 0            | 0 | -0.16252401  |
| cov2_3_4_7_8  | 29.4226 | -453.301 | 0.3181814 | 0 | 0            | 0 | -0.1149882   |
| cov1_3_4_5_8  | 29.4314 | -453.305 | 0.3176154 | 0 | -0.15979424  | 0 | 0            |
| cov1_4_7_8_10 | 29.4324 | -453.306 | 0.3148254 | 0 | -0.074460023 | 0 | 0            |
| cov2_4_7_8_11 | 29.4326 | -453.306 | 0.3243427 | 0 | 0            | 0 | -0.16205745  |
| cov1_4_7_9_10 | 29.4367 | -453.308 | 0.3146885 | 0 | -0.072416638 | 0 | 0            |
| cov1_2_7_8_11 | 29.4387 | -453.309 | 0.3201465 | 0 | -0.087018211 | 0 | -0.060994047 |
| cov1_7_8_9_10 | 29.4403 | -453.309 | 0.3140131 | 0 | -0.059316864 | 0 | 0            |
| cov1_4_8_9_10 | 29.4517 | -453.315 | 0.3146399 | 0 | -0.072319885 | 0 | 0            |
| cov2_3_4_5_7  | 29.4537 | -453.316 | 0.3178632 | 0 | 0            | 0 | -0.11226213  |
| cov2_3_4_6_11 | 29.4612 | -453.32  | 0.3226971 | 0 | 0            | 0 | -0.17331701  |
| cov1_3_5_7_8  | 29.4625 | -453.321 | 0.3176    | 0 | -0.1548093   | 0 | 0            |

|                |         |          |           |   |              |   |              |
|----------------|---------|----------|-----------|---|--------------|---|--------------|
| cov3_5_7_10_11 | 29.4643 | -453.322 | 0.3092808 | 0 | 0            | 0 | 0            |
| cov2_3_4_5_8   | 29.5078 | -453.343 | 0.3180394 | 0 | 0            | 0 | -0.11339275  |
| cov3_4_6_7_10  | 29.5127 | -453.346 | 0.3090307 | 0 | 0            | 0 | 0            |
| cov3_5_8_10_11 | 29.5243 | -453.351 | 0.3093866 | 0 | 0            | 0 | 0            |
| cov2_3_4_5_6   | 29.5405 | -453.36  | 0.3213616 | 0 | 0            | 0 | -0.17074634  |
| cov3_4_6_8_10  | 29.5646 | -453.372 | 0.3091147 | 0 | 0            | 0 | 0            |
| cov2_3_4_5_11  | 29.565  | -453.372 | 0.322176  | 0 | 0            | 0 | -0.15850788  |
| cov1_3_4_9_10  | 29.5657 | -453.372 | 0.3133351 | 0 | -0.068833119 | 0 | 0            |
| cov1_2_3_7_8   | 29.5829 | -453.381 | 0.3136893 | 0 | -0.029491336 | 0 | -0.052022569 |
| cov3_5_7_8_9   | 29.5936 | -453.386 | 0.3096512 | 0 | 0            | 0 | 0            |
| cov3_4_5_7_9   | 29.6215 | -453.4   | 0.3095673 | 0 | 0            | 0 | 0            |
| cov3_4_7_9_11  | 29.6258 | -453.402 | 0.3100295 | 0 | 0            | 0 | 0            |
| cov3_5_6_9_11  | 29.636  | -453.407 | 0.3086644 | 0 | 0            | 0 | 0            |
| cov3_5_7_9_10  | 29.6494 | -453.414 | 0.3097063 | 0 | 0            | 0 | 0            |
| cov3_4_5_6_9   | 29.6513 | -453.415 | 0.3083708 | 0 | 0            | 0 | 0            |
| cov2_3_5_7_8   | 29.6655 | -453.422 | 0.3158322 | 0 | 0            | 0 | -0.088299354 |
| cov3_4_8_9_11  | 29.6782 | -453.428 | 0.3101202 | 0 | 0            | 0 | 0            |
| cov3_4_5_8_9   | 29.6796 | -453.429 | 0.3096667 | 0 | 0            | 0 | 0            |
| cov3_4_7_8_9   | 29.6835 | -453.431 | 0.3100726 | 0 | 0            | 0 | 0            |
| cov3_5_7_8_10  | 29.6872 | -453.433 | 0.309818  | 0 | 0            | 0 | 0            |
| cov1_4_7_8_11  | 29.6999 | -453.439 | 0.3199768 | 0 | -0.16151714  | 0 | 0            |
| cov3_5_8_9_10  | 29.709  | -453.444 | 0.3098102 | 0 | 0            | 0 | 0            |
| cov3_5_6_9_10  | 29.712  | -453.445 | 0.3086547 | 0 | 0            | 0 | 0            |
| cov3_4_5_7_10  | 29.7183 | -453.449 | 0.3097422 | 0 | 0            | 0 | 0            |
| cov3_4_7_9_10  | 29.7384 | -453.459 | 0.3101078 | 0 | 0            | 0 | 0            |
| cov2_4_5_7_8   | 29.753  | -453.466 | 0.3226382 | 0 | 0            | 0 | -0.14010195  |
| cov3_4_7_10_11 | 29.7681 | -453.473 | 0.3102926 | 0 | 0            | 0 | 0            |
| cov3_5_6_10_11 | 29.7761 | -453.477 | 0.308955  | 0 | 0            | 0 | 0            |
| cov3_4_5_8_10  | 29.7765 | -453.478 | 0.3098421 | 0 | 0            | 0 | 0            |
| cov3_4_5_6_10  | 29.7909 | -453.485 | 0.3086799 | 0 | 0            | 0 | 0            |
| cov3_4_8_9_10  | 29.7926 | -453.486 | 0.3102009 | 0 | 0            | 0 | 0            |
| cov3_4_7_8_10  | 29.8039 | -453.491 | 0.3103114 | 0 | 0            | 0 | 0            |
| cov5_6_7_8_9   | 29.8069 | -453.493 | 0.3121841 | 0 | 0            | 0 | 0            |
| cov5_6_7_9_10  | 29.8184 | -453.499 | 0.312143  | 0 | 0            | 0 | 0            |
| cov3_4_8_10_11 | 29.8207 | -453.5   | 0.3103842 | 0 | 0            | 0 | 0            |
| cov4_5_6_7_9   | 29.8227 | -453.501 | 0.3121207 | 0 | 0            | 0 | 0            |
| cov2_3_5_6_11  | 29.828  | -453.503 | 0.3191708 | 0 | 0            | 0 | -0.13760934  |
| cov5_6_8_9_10  | 29.8303 | -453.504 | 0.3121093 | 0 | 0            | 0 | 0            |
| cov4_5_6_8_9   | 29.8339 | -453.506 | 0.3120859 | 0 | 0            | 0 | 0            |
| cov5_6_7_9_11  | 29.8349 | -453.507 | 0.31225   | 0 | 0            | 0 | 0            |
| cov5_6_8_9_11  | 29.8465 | -453.513 | 0.312221  | 0 | 0            | 0 | 0            |
| cov2_5_6_7_11  | 29.9104 | -453.545 | 0.3226503 | 0 | 0            | 0 | -0.1401087   |
| cov2_5_6_8_11  | 29.9222 | -453.55  | 0.3226331 | 0 | 0            | 0 | -0.1402796   |
| cov2_6_7_8_11  | 29.9253 | -453.552 | 0.3222095 | 0 | 0            | 0 | -0.1352625   |
| cov4_5_6_9_10  | 29.9255 | -453.552 | 0.3113797 | 0 | 0            | 0 | 0            |
| cov5_6_7_8_10  | 29.9257 | -453.552 | 0.3124199 | 0 | 0            | 0 | 0            |
| cov4_5_6_9_11  | 29.9262 | -453.552 | 0.3116435 | 0 | 0            | 0 | 0            |

|                |         |          |           |   |              |   |             |
|----------------|---------|----------|-----------|---|--------------|---|-------------|
| cov5_6_9_10_11 | 29.9392 | -453.559 | 0.3116328 | 0 | 0            | 0 | 0           |
| cov4_5_6_7_10  | 29.9462 | -453.562 | 0.3123724 | 0 | 0            | 0 | 0           |
| cov5_6_7_10_11 | 29.9553 | -453.567 | 0.3124678 | 0 | 0            | 0 | 0           |
| cov4_5_6_8_10  | 29.9575 | -453.568 | 0.3123318 | 0 | 0            | 0 | 0           |
| cov1_3_4_7_8   | 29.9616 | -453.57  | 0.3136211 | 0 | -0.083612797 | 0 | 0           |
| cov2_5_6_7_8   | 29.9655 | -453.572 | 0.3220304 | 0 | 0            | 0 | -0.13520382 |
| cov5_6_8_10_11 | 29.9669 | -453.573 | 0.312438  | 0 | 0            | 0 | 0           |
| cov3_4_5_9_11  | 30.0548 | -453.617 | 0.3107546 | 0 | 0            | 0 | 0           |
| cov4_5_6_10_11 | 30.0549 | -453.617 | 0.311858  | 0 | 0            | 0 | 0           |
| cov3_4_6_9_11  | 30.0721 | -453.625 | 0.3106371 | 0 | 0            | 0 | 0           |
| cov2_5_7_8_11  | 30.0738 | -453.626 | 0.3226071 | 0 | 0            | 0 | -0.12719922 |
| cov3_4_6_9_10  | 30.0891 | -453.634 | 0.310539  | 0 | 0            | 0 | 0           |
| cov3_5_9_10_11 | 30.1145 | -453.647 | 0.3109759 | 0 | 0            | 0 | 0           |
| cov3_4_5_10_11 | 30.1776 | -453.678 | 0.310985  | 0 | 0            | 0 | 0           |
| cov5_7_8_9_11  | 30.199  | -453.689 | 0.3137657 | 0 | 0            | 0 | 0           |
| cov4_6_7_8_9   | 30.2018 | -453.69  | 0.3135835 | 0 | 0            | 0 | 0           |
| cov4_5_7_9_11  | 30.2353 | -453.707 | 0.3137516 | 0 | 0            | 0 | 0           |
| cov3_4_9_10_11 | 30.2377 | -453.708 | 0.3115201 | 0 | 0            | 0 | 0           |
| cov4_6_7_9_11  | 30.2403 | -453.709 | 0.3135076 | 0 | 0            | 0 | 0           |
| cov4_6_7_9_10  | 30.2413 | -453.71  | 0.3136107 | 0 | 0            | 0 | 0           |
| cov5_7_9_10_11 | 30.2432 | -453.711 | 0.3137973 | 0 | 0            | 0 | 0           |
| cov3_4_6_10_11 | 30.2447 | -453.712 | 0.31102   | 0 | 0            | 0 | 0           |
| cov4_5_8_9_11  | 30.2464 | -453.713 | 0.3137136 | 0 | 0            | 0 | 0           |
| cov4_6_8_9_11  | 30.2506 | -453.715 | 0.3134748 | 0 | 0            | 0 | 0           |
| cov4_6_8_9_10  | 30.251  | -453.715 | 0.3135704 | 0 | 0            | 0 | 0           |
| cov5_8_9_10_11 | 30.2553 | -453.717 | 0.3137607 | 0 | 0            | 0 | 0           |
| cov4_5_7_8_9   | 30.2707 | -453.725 | 0.3136064 | 0 | 0            | 0 | 0           |
| cov5_7_8_9_10  | 30.2799 | -453.729 | 0.3136566 | 0 | 0            | 0 | 0           |
| cov4_5_9_10_11 | 30.2999 | -453.739 | 0.3132357 | 0 | 0            | 0 | 0           |
| cov5_7_8_10_11 | 30.3019 | -453.74  | 0.3139479 | 0 | 0            | 0 | 0           |
| cov4_6_9_10_11 | 30.313  | -453.746 | 0.3130365 | 0 | 0            | 0 | 0           |
| cov4_5_7_9_10  | 30.3175 | -453.748 | 0.3136403 | 0 | 0            | 0 | 0           |
| cov3_4_5_9_10  | 30.3232 | -453.751 | 0.3112793 | 0 | 0            | 0 | 0           |
| cov4_5_8_9_10  | 30.3319 | -453.755 | 0.3135993 | 0 | 0            | 0 | 0           |
| cov4_7_8_9_11  | 30.3328 | -453.756 | 0.3141116 | 0 | 0            | 0 | 0           |
| cov4_5_7_10_11 | 30.3418 | -453.76  | 0.3139438 | 0 | 0            | 0 | 0           |
| cov4_7_8_9_10  | 30.3512 | -453.765 | 0.3139845 | 0 | 0            | 0 | 0           |
| cov4_5_8_10_11 | 30.3531 | -453.766 | 0.3139054 | 0 | 0            | 0 | 0           |
| cov4_6_7_8_10  | 30.3563 | -453.768 | 0.313932  | 0 | 0            | 0 | 0           |
| cov4_5_7_8_10  | 30.3659 | -453.772 | 0.3137938 | 0 | 0            | 0 | 0           |
| cov4_7_9_10_11 | 30.3838 | -453.781 | 0.314158  | 0 | 0            | 0 | 0           |
| cov4_6_7_10_11 | 30.3926 | -453.786 | 0.3138209 | 0 | 0            | 0 | 0           |
| cov4_8_9_10_11 | 30.3943 | -453.787 | 0.3141205 | 0 | 0            | 0 | 0           |
| cov4_6_8_10_11 | 30.4033 | -453.791 | 0.3137875 | 0 | 0            | 0 | 0           |
| cov3_7_8_9_11  | 30.4123 | -453.796 | 0.313216  | 0 | 0            | 0 | 0           |
| cov3_6_7_8_9   | 30.4355 | -453.807 | 0.3134765 | 0 | 0            | 0 | 0           |
| cov4_7_8_10_11 | 30.4628 | -453.821 | 0.3143558 | 0 | 0            | 0 | 0           |

|                  |         |          |           |   |             |   |              |
|------------------|---------|----------|-----------|---|-------------|---|--------------|
| cov3_7_9_10_11   | 30.4702 | -453.824 | 0.3132525 | 0 | 0           | 0 | 0            |
| cov3_6_7_9_11    | 30.4719 | -453.825 | 0.3132885 | 0 | 0           | 0 | 0            |
| cov3_7_8_9_10    | 30.4749 | -453.827 | 0.3137179 | 0 | 0           | 0 | 0            |
| cov3_6_7_9_10    | 30.4965 | -453.838 | 0.3135192 | 0 | 0           | 0 | 0            |
| cov3_8_9_10_11   | 30.5236 | -453.851 | 0.3133416 | 0 | 0           | 0 | 0            |
| cov3_6_8_9_11    | 30.525  | -453.852 | 0.3133703 | 0 | 0           | 0 | 0            |
| cov3_6_8_9_10    | 30.5491 | -453.864 | 0.3136063 | 0 | 0           | 0 | 0            |
| cov3_7_8_10_11   | 30.5657 | -453.872 | 0.3135223 | 0 | 0           | 0 | 0            |
| cov3_6_7_8_10    | 30.5896 | -453.884 | 0.3138086 | 0 | 0           | 0 | 0            |
| cov3_6_7_10_11   | 30.6218 | -453.9   | 0.3135884 | 0 | 0           | 0 | 0            |
| cov3_6_8_10_11   | 30.675  | -453.927 | 0.3136768 | 0 | 0           | 0 | 0            |
| cov6_7_8_9_11    | 30.8259 | -454.002 | 0.3156381 | 0 | 0           | 0 | 0            |
| cov7_8_9_10_11   | 30.8269 | -454.003 | 0.3156287 | 0 | 0           | 0 | 0            |
| cov6_7_8_9_10    | 30.8616 | -454.02  | 0.3160016 | 0 | 0           | 0 | 0            |
| cov3_4_5_6_7     | 30.8815 | -454.03  | 0.3091813 | 0 | 0           | 0 | 0            |
| cov6_7_9_10_11   | 30.8844 | -454.032 | 0.3156935 | 0 | 0           | 0 | 0            |
| cov6_8_9_10_11   | 30.9035 | -454.041 | 0.3156686 | 0 | 0           | 0 | 0            |
| cov3_5_6_7_11    | 30.909  | -454.044 | 0.3095215 | 0 | 0           | 0 | 0            |
| cov3_5_6_7_8     | 30.9096 | -454.044 | 0.3095021 | 0 | 0           | 0 | 0            |
| cov6_7_8_10_11   | 30.9652 | -454.072 | 0.315926  | 0 | 0           | 0 | 0            |
| cov3_4_5_6_8     | 30.974  | -454.076 | 0.3093206 | 0 | 0           | 0 | 0            |
| cov3_5_6_8_11    | 31.0047 | -454.092 | 0.3096695 | 0 | 0           | 0 | 0            |
| cov3_4_5_7_11    | 31.0154 | -454.097 | 0.3105407 | 0 | 0           | 0 | 0            |
| cov3_5_7_8_11    | 31.0258 | -454.102 | 0.3107524 | 0 | 0           | 0 | 0            |
| cov3_6_9_10_11   | 31.0413 | -454.11  | 0.3145715 | 0 | 0           | 0 | 0            |
| cov3_4_5_7_8     | 31.0751 | -454.127 | 0.3107912 | 0 | 0           | 0 | 0            |
| cov3_4_5_8_11    | 31.1064 | -454.143 | 0.310679  | 0 | 0           | 0 | 0            |
| cov3_4_6_7_8     | 31.2492 | -454.214 | 0.3112681 | 0 | 0           | 0 | 0            |
| cov3_4_7_8_11    | 31.2539 | -454.216 | 0.3114643 | 0 | 0           | 0 | 0            |
| cov3_4_6_7_11    | 31.2889 | -454.234 | 0.3113143 | 0 | 0           | 0 | 0            |
| cov3_4_6_8_11    | 31.3737 | -454.276 | 0.3114408 | 0 | 0           | 0 | 0            |
| cov1_2_5_6_9_11  | 31.4729 | -450.828 | 0.3186438 | 0 | -0.27906264 | 0 | -0.067099389 |
| cov1_2_4_6_9_11  | 31.5568 | -450.87  | 0.3185311 | 0 | -0.23375246 | 0 | -0.091700645 |
| cov1_2_5_6_10_11 | 31.5737 | -450.879 | 0.3189014 | 0 | -0.28219868 | 0 | -0.066300503 |
| cov1_2_4_6_10_11 | 31.6629 | -450.923 | 0.3187716 | 0 | -0.23591223 | 0 | -0.091019794 |
| cov1_2_3_6_9_11  | 31.7571 | -450.97  | 0.3149565 | 0 | -0.22624946 | 0 | -0.063288373 |
| cov1_2_6_7_9_11  | 31.8589 | -451.021 | 0.3162338 | 0 | -0.22282174 | 0 | -0.063699517 |
| cov1_2_6_8_9_11  | 31.859  | -451.021 | 0.3162318 | 0 | -0.22288616 | 0 | -0.063704812 |
| cov1_2_6_9_10_11 | 31.8593 | -451.022 | 0.3161968 | 0 | -0.2234571  | 0 | -0.06360843  |
| cov1_2_3_6_10_11 | 31.875  | -451.029 | 0.3151907 | 0 | -0.22838322 | 0 | -0.062096233 |
| cov1_2_6_7_10_11 | 31.9716 | -451.078 | 0.3164469 | 0 | -0.2250516  | 0 | -0.062416704 |
| cov1_2_6_8_10_11 | 31.9717 | -451.078 | 0.3164445 | 0 | -0.22511971 | 0 | -0.062417205 |
| cov1_4_5_6_9_11  | 31.986  | -451.085 | 0.3170618 | 0 | -0.32991994 | 0 | 0            |
| cov3_6_7_8_11    | 32.038  | -454.608 | 0.3150855 | 0 | 0           | 0 | 0            |
| cov1_4_5_6_10_11 | 32.0754 | -451.13  | 0.3173006 | 0 | -0.33198536 | 0 | 0            |
| cov1_3_5_6_9_11  | 32.1271 | -451.155 | 0.3166005 | 0 | -0.32076212 | 0 | 0            |
| cov1_5_6_9_10_11 | 32.1403 | -451.162 | 0.3172629 | 0 | -0.32454688 | 0 | 0            |

|                  |         |          |           |   |             |   |              |
|------------------|---------|----------|-----------|---|-------------|---|--------------|
| cov1_5_6_7_9_11  | 32.1404 | -451.162 | 0.3172606 | 0 | -0.32437446 | 0 | 0            |
| cov1_5_6_8_9_11  | 32.1404 | -451.162 | 0.3172575 | 0 | -0.32443451 | 0 | 0            |
| cov1_2_5_6_7_9   | 32.171  | -451.177 | 0.3168815 | 0 | -0.24083823 | 0 | -0.061749037 |
| cov1_2_5_6_8_9   | 32.1726 | -451.178 | 0.3168777 | 0 | -0.24109237 | 0 | -0.061742842 |
| cov1_3_5_6_10_11 | 32.2127 | -451.198 | 0.3168801 | 0 | -0.32299169 | 0 | 0            |
| cov1_2_3_5_6_9   | 32.2183 | -451.201 | 0.317131  | 0 | -0.24793172 | 0 | -0.061962312 |
| cov1_3_6_7_9_11  | 32.2203 | -451.202 | 0.3132083 | 0 | -0.26679449 | 0 | 0            |
| cov1_5_6_7_10_11 | 32.2239 | -451.204 | 0.3174847 | 0 | -0.32620323 | 0 | 0            |
| cov1_5_6_8_10_11 | 32.2239 | -451.204 | 0.3174816 | 0 | -0.32626415 | 0 | 0            |
| cov1_3_6_8_9_11  | 32.225  | -451.204 | 0.3132383 | 0 | -0.26746728 | 0 | 0            |
| cov1_2_4_5_6_9   | 32.2265 | -451.205 | 0.3165297 | 0 | -0.23873356 | 0 | -0.066133193 |
| cov1_2_5_6_9_10  | 32.2313 | -451.208 | 0.3164129 | 0 | -0.24368738 | 0 | -0.061475135 |
| cov1_2_4_6_7_9   | 32.2408 | -451.212 | 0.3169535 | 0 | -0.19628321 | 0 | -0.085453137 |
| cov1_2_4_6_8_9   | 32.2437 | -451.214 | 0.3169443 | 0 | -0.1966267  | 0 | -0.085379737 |
| cov1_2_5_6_7_10  | 32.2611 | -451.222 | 0.3171183 | 0 | -0.24381277 | 0 | -0.060881617 |
| cov1_2_5_6_8_10  | 32.2628 | -451.223 | 0.3171146 | 0 | -0.24406661 | 0 | -0.060876706 |
| cov1_2_4_5_6_11  | 32.2877 | -451.236 | 0.3224797 | 0 | -0.32010747 | 0 | -0.078297193 |
| cov1_2_3_5_6_11  | 32.2923 | -451.238 | 0.3218136 | 0 | -0.32392103 | 0 | -0.071393942 |
| cov1_2_5_6_7_11  | 32.2971 | -451.24  | 0.3222723 | 0 | -0.32545277 | 0 | -0.07165832  |
| cov1_2_5_6_8_11  | 32.2972 | -451.24  | 0.3222699 | 0 | -0.32552279 | 0 | -0.071659596 |
| cov1_2_3_6_7_9   | 32.3021 | -451.243 | 0.3128033 | 0 | -0.18548561 | 0 | -0.057785917 |
| cov1_2_3_5_6_10  | 32.3064 | -451.245 | 0.3174071 | 0 | -0.25111726 | 0 | -0.061118514 |
| cov1_2_3_6_8_9   | 32.3098 | -451.247 | 0.3128377 | 0 | -0.18627729 | 0 | -0.057799541 |
| cov1_2_4_5_6_10  | 32.3162 | -451.25  | 0.3167639 | 0 | -0.24155599 | 0 | -0.065344543 |
| cov1_3_6_7_10_11 | 32.3196 | -451.252 | 0.3134489 | 0 | -0.26801871 | 0 | 0            |
| cov1_3_6_8_10_11 | 32.3242 | -451.254 | 0.3134786 | 0 | -0.26868438 | 0 | 0            |
| cov1_2_4_6_7_10  | 32.3328 | -451.258 | 0.3171885 | 0 | -0.19870423 | 0 | -0.08465942  |
| cov1_2_4_6_8_10  | 32.3357 | -451.26  | 0.317179  | 0 | -0.19904854 | 0 | -0.084584918 |
| cov1_3_4_6_9_11  | 32.3501 | -451.267 | 0.3135544 | 0 | -0.27081906 | 0 | 0            |
| cov1_3_6_9_10_11 | 32.3531 | -451.268 | 0.3138457 | 0 | -0.27391285 | 0 | 0            |
| cov1_2_3_4_6_9   | 32.3567 | -451.27  | 0.316498  | 0 | -0.19872167 | 0 | -0.084124872 |
| cov1_2_4_6_9_10  | 32.3631 | -451.273 | 0.3159488 | 0 | -0.19828025 | 0 | -0.081766105 |
| cov1_2_3_6_7_10  | 32.4079 | -451.296 | 0.3130472 | 0 | -0.18794421 | 0 | -0.056717097 |
| cov1_2_3_6_8_10  | 32.4154 | -451.3   | 0.3130802 | 0 | -0.18873219 | 0 | -0.056725488 |
| cov1_3_4_6_10_11 | 32.4468 | -451.315 | 0.3138598 | 0 | -0.27271337 | 0 | 0            |
| cov1_2_3_4_6_10  | 32.4471 | -451.315 | 0.3167827 | 0 | -0.20126885 | 0 | -0.083463603 |
| cov1_4_6_9_10_11 | 32.4577 | -451.321 | 0.3152576 | 0 | -0.27399501 | 0 | 0            |
| cov1_4_6_7_9_11  | 32.4597 | -451.322 | 0.3153244 | 0 | -0.27352749 | 0 | 0            |
| cov1_4_6_8_9_11  | 32.4599 | -451.322 | 0.3153207 | 0 | -0.27359214 | 0 | 0            |
| cov1_6_7_9_10_11 | 32.46   | -451.322 | 0.3151412 | 0 | -0.27074976 | 0 | 0            |
| cov1_6_8_9_10_11 | 32.4602 | -451.322 | 0.3151386 | 0 | -0.27082002 | 0 | 0            |
| cov1_6_7_8_9_11  | 32.4629 | -451.323 | 0.3151325 | 0 | -0.27040036 | 0 | 0            |
| cov1_2_6_7_9_10  | 32.5129 | -451.348 | 0.3146116 | 0 | -0.18907856 | 0 | -0.05850056  |
| cov1_2_6_8_9_10  | 32.5145 | -451.349 | 0.314604  | 0 | -0.18935046 | 0 | -0.058499693 |
| cov1_2_6_7_8_9   | 32.5146 | -451.349 | 0.3146014 | 0 | -0.18850646 | 0 | -0.058695695 |
| cov1_4_6_7_10_11 | 32.5463 | -451.365 | 0.315556  | 0 | -0.27517004 | 0 | 0            |
| cov1_4_6_8_10_11 | 32.5465 | -451.365 | 0.3155523 | 0 | -0.27523712 | 0 | 0            |



|                  |         |          |           |   |             |   |              |
|------------------|---------|----------|-----------|---|-------------|---|--------------|
| cov1_6_7_8_10_11 | 32.5509 | -451.367 | 0.3153364 | 0 | -0.27160681 | 0 | 0            |
| cov1_2_3_6_9_10  | 32.5684 | -451.376 | 0.3135083 | 0 | -0.19124567 | 0 | -0.057717099 |
| cov1_4_5_6_7_9   | 32.6002 | -451.392 | 0.3154632 | 0 | -0.2919582  | 0 | 0            |
| cov1_4_5_6_8_9   | 32.6011 | -451.392 | 0.3154592 | 0 | -0.29213873 | 0 | 0            |
| cov1_2_6_7_8_10  | 32.6109 | -451.397 | 0.3148144 | 0 | -0.19118538 | 0 | -0.05741869  |
| cov1_3_4_5_6_9   | 32.6239 | -451.404 | 0.3152316 | 0 | -0.29445551 | 0 | 0            |
| cov1_4_5_6_9_10  | 32.6241 | -451.404 | 0.3151467 | 0 | -0.29403198 | 0 | 0            |
| cov1_4_5_6_7_10  | 32.6801 | -451.432 | 0.315691  | 0 | -0.29382876 | 0 | 0            |
| cov1_4_5_6_8_10  | 32.681  | -451.432 | 0.3156868 | 0 | -0.29401023 | 0 | 0            |
| cov1_3_5_6_7_9   | 32.7032 | -451.444 | 0.3143458 | 0 | -0.2699627  | 0 | 0            |
| cov1_3_4_5_6_10  | 32.7038 | -451.444 | 0.3155109 | 0 | -0.29669734 | 0 | 0            |
| cov1_3_5_6_8_9   | 32.7075 | -451.446 | 0.3144073 | 0 | -0.27111392 | 0 | 0            |
| cov1_5_6_7_8_9   | 32.7388 | -451.461 | 0.315785  | 0 | -0.28515238 | 0 | 0            |
| cov1_5_6_7_9_10  | 32.7394 | -451.462 | 0.3157861 | 0 | -0.28531364 | 0 | 0            |
| cov1_5_6_8_9_10  | 32.741  | -451.462 | 0.3157825 | 0 | -0.28555234 | 0 | 0            |
| cov1_3_5_6_7_10  | 32.7818 | -451.483 | 0.3146717 | 0 | -0.27305493 | 0 | 0            |
| cov1_3_5_6_8_10  | 32.7858 | -451.485 | 0.3147309 | 0 | -0.2741603  | 0 | 0            |
| cov1_3_4_6_7_9   | 32.7872 | -451.486 | 0.3113158 | 0 | -0.22456453 | 0 | 0            |
| cov1_3_5_6_9_10  | 32.7884 | -451.486 | 0.3157743 | 0 | -0.29047584 | 0 | 0            |
| cov1_3_4_6_8_9   | 32.7956 | -451.49  | 0.3113588 | 0 | -0.2254875  | 0 | 0            |
| cov1_3_6_7_8_9   | 32.8016 | -451.493 | 0.3119229 | 0 | -0.23087682 | 0 | 0            |
| cov1_3_6_7_9_10  | 32.802  | -451.493 | 0.3119481 | 0 | -0.23133834 | 0 | 0            |
| cov1_3_4_5_6_11  | 32.803  | -451.493 | 0.3195176 | 0 | -0.37624017 | 0 | 0            |
| cov1_2_4_6_7_11  | 32.8031 | -451.493 | 0.3233134 | 0 | -0.24550695 | 0 | -0.11530353  |
| cov1_2_4_6_8_11  | 32.8045 | -451.494 | 0.3233097 | 0 | -0.24579252 | 0 | -0.115268    |
| cov1_3_6_8_9_10  | 32.8099 | -451.497 | 0.3119826 | 0 | -0.23214474 | 0 | 0            |
| cov1_5_6_7_8_10  | 32.812  | -451.498 | 0.3159916 | 0 | -0.2869214  | 0 | 0            |
| cov1_2_3_4_6_11  | 32.8217 | -451.503 | 0.3216439 | 0 | -0.24965307 | 0 | -0.10925286  |
| cov1_4_5_6_8_11  | 32.8306 | -451.507 | 0.3204902 | 0 | -0.38361193 | 0 | 0            |
| cov1_4_5_6_7_11  | 32.8308 | -451.507 | 0.3204935 | 0 | -0.38364886 | 0 | 0            |
| cov1_3_4_6_7_10  | 32.878  | -451.531 | 0.3116466 | 0 | -0.22706172 | 0 | 0            |
| cov1_3_4_6_8_10  | 32.886  | -451.535 | 0.3116889 | 0 | -0.22796848 | 0 | 0            |
| cov1_3_6_7_8_10  | 32.8887 | -451.536 | 0.3121704 | 0 | -0.23248774 | 0 | 0            |
| cov3_4_5_6_11    | 32.9321 | -455.055 | 0.3148376 | 0 | 0           | 0 | 0            |
| cov1_2_3_6_7_11  | 32.9553 | -451.57  | 0.3155009 | 0 | -0.22464777 | 0 | -0.064920733 |
| cov1_2_3_6_8_11  | 32.9658 | -451.575 | 0.3155536 | 0 | -0.22580883 | 0 | -0.064961271 |
| cov1_3_5_6_7_11  | 33.0129 | -451.598 | 0.3194012 | 0 | -0.3587796  | 0 | 0            |
| cov1_3_5_6_8_11  | 33.0149 | -451.599 | 0.3194475 | 0 | -0.35965265 | 0 | 0            |
| cov1_4_6_7_9_10  | 33.0208 | -451.602 | 0.3139618 | 0 | -0.23846671 | 0 | 0            |
| cov1_4_6_8_9_10  | 33.0224 | -451.603 | 0.3139536 | 0 | -0.23869092 | 0 | 0            |
| cov1_6_7_8_9_10  | 33.0238 | -451.604 | 0.3137664 | 0 | -0.23536482 | 0 | 0            |
| cov1_4_6_7_8_9   | 33.0268 | -451.605 | 0.3139578 | 0 | -0.23807512 | 0 | 0            |
| cov1_2_3_5_6_7   | 33.0531 | -451.618 | 0.319384  | 0 | -0.27509225 | 0 | -0.065160868 |
| cov1_2_3_5_6_8   | 33.0571 | -451.62  | 0.319444  | 0 | -0.27613451 | 0 | -0.065225423 |
| cov1_5_6_7_8_11  | 33.059  | -451.621 | 0.3210692 | 0 | -0.37645692 | 0 | 0            |
| cov1_3_4_6_9_10  | 33.0657 | -451.625 | 0.3125291 | 0 | -0.23580148 | 0 | 0            |
| cov1_2_4_5_6_7   | 33.0699 | -451.627 | 0.3208593 | 0 | -0.28113843 | 0 | -0.072276059 |

|                  |         |          |           |   |             |   |              |
|------------------|---------|----------|-----------|---|-------------|---|--------------|
| cov1_2_4_5_6_8   | 33.072  | -451.628 | 0.3208515 | 0 | -0.28156619 | 0 | -0.072161966 |
| cov1_2_5_6_7_8   | 33.0771 | -451.63  | 0.3206105 | 0 | -0.28699959 | 0 | -0.066206478 |
| cov1_4_6_7_8_10  | 33.0992 | -451.642 | 0.3141848 | 0 | -0.24006204 | 0 | 0            |
| cov1_2_3_4_5_6   | 33.141  | -451.662 | 0.321053  | 0 | -0.29378342 | 0 | -0.069219688 |
| cov4_6_7_8_11    | 33.2503 | -455.215 | 0.3203366 | 0 | 0           | 0 | 0            |
| cov4_5_6_7_8     | 33.2506 | -455.215 | 0.3204599 | 0 | 0           | 0 | 0            |
| cov5_6_7_8_11    | 33.2773 | -455.228 | 0.3204394 | 0 | 0           | 0 | 0            |
| cov4_5_6_7_11    | 33.2864 | -455.233 | 0.3203038 | 0 | 0           | 0 | 0            |
| cov4_5_6_8_11    | 33.3063 | -455.242 | 0.3202728 | 0 | 0           | 0 | 0            |
| cov4_5_7_8_11    | 33.3209 | -455.25  | 0.3202107 | 0 | 0           | 0 | 0            |
| cov1_2_3_4_6_7   | 33.3577 | -451.771 | 0.3178914 | 0 | -0.19957369 | 0 | -0.093060969 |
| cov1_2_3_4_6_8   | 33.37   | -451.777 | 0.3179593 | 0 | -0.20069359 | 0 | -0.093260945 |
| cov1_3_4_5_6_7   | 33.4843 | -451.834 | 0.3175018 | 0 | -0.32621407 | 0 | 0            |
| cov1_3_4_5_6_8   | 33.4875 | -451.836 | 0.3175521 | 0 | -0.32726714 | 0 | 0            |
| cov1_4_5_6_7_8   | 33.5268 | -451.855 | 0.3190844 | 0 | -0.34321431 | 0 | 0            |
| cov1_3_4_6_7_11  | 33.5802 | -451.882 | 0.3147225 | 0 | -0.27610435 | 0 | 0            |
| cov1_3_6_7_8_11  | 33.5824 | -451.883 | 0.314468  | 0 | -0.27311858 | 0 | 0            |
| cov1_3_4_6_8_11  | 33.5912 | -451.888 | 0.3147864 | 0 | -0.27741399 | 0 | 0            |
| cov1_2_4_6_7_8   | 33.5942 | -451.889 | 0.3215584 | 0 | -0.20761989 | 0 | -0.10866522  |
| cov1_3_5_6_7_8   | 33.6831 | -451.933 | 0.318002  | 0 | -0.31902065 | 0 | 0            |
| cov1_2_3_6_7_8   | 33.702  | -451.943 | 0.3139437 | 0 | -0.1882688  | 0 | -0.059676973 |
| cov1_2_6_7_8_11  | 33.8236 | -452.004 | 0.3202282 | 0 | -0.23241914 | 0 | -0.0674442   |
| cov2_4_5_6_9_11  | 33.955  | -452.069 | 0.3173299 | 0 | 0           | 0 | -0.15907275  |
| cov2_3_5_6_7_9   | 33.9727 | -452.078 | 0.309687  | 0 | 0           | 0 | -0.095194457 |
| cov2_4_5_6_7_9   | 34.0049 | -452.094 | 0.3172043 | 0 | 0           | 0 | -0.15055282  |
| cov2_3_5_6_8_9   | 34.0101 | -452.097 | 0.3097905 | 0 | 0           | 0 | -0.095837631 |
| cov2_4_5_6_8_9   | 34.0179 | -452.101 | 0.3171751 | 0 | 0           | 0 | -0.150547    |
| cov2_4_5_6_10_11 | 34.1125 | -452.148 | 0.3176187 | 0 | 0           | 0 | -0.15866804  |
| cov2_3_5_6_7_10  | 34.1408 | -452.162 | 0.310025  | 0 | 0           | 0 | -0.094894495 |
| cov2_4_5_6_7_10  | 34.1427 | -452.163 | 0.3175155 | 0 | 0           | 0 | -0.15047363  |
| cov2_4_5_6_8_10  | 34.1557 | -452.17  | 0.3174849 | 0 | 0           | 0 | -0.15046365  |
| cov2_3_5_6_8_10  | 34.1784 | -452.181 | 0.3101307 | 0 | 0           | 0 | -0.095530448 |
| cov1_3_4_6_7_8   | 34.2308 | -452.207 | 0.3134864 | 0 | -0.23901725 | 0 | 0            |
| cov2_3_4_5_6_9   | 34.2792 | -452.232 | 0.3154409 | 0 | 0           | 0 | -0.14385039  |
| cov2_4_5_6_9_10  | 34.2808 | -452.232 | 0.3158156 | 0 | 0           | 0 | -0.14521865  |
| cov1_4_6_7_8_11  | 34.2846 | -452.234 | 0.3201531 | 0 | -0.30275168 | 0 | 0            |
| cov2_3_6_7_9_11  | 34.4195 | -452.302 | 0.3154677 | 0 | 0           | 0 | -0.12669683  |
| cov2_3_4_5_6_10  | 34.4207 | -452.302 | 0.3157918 | 0 | 0           | 0 | -0.14396896  |
| cov2_3_5_6_9_11  | 34.439  | -452.311 | 0.3133019 | 0 | 0           | 0 | -0.11462727  |
| cov2_3_6_8_9_11  | 34.4483 | -452.316 | 0.3155446 | 0 | 0           | 0 | -0.12713048  |
| cov2_3_6_7_8_9   | 34.486  | -452.335 | 0.3147473 | 0 | 0           | 0 | -0.12022267  |
| cov2_3_4_6_7_9   | 34.4972 | -452.341 | 0.3156496 | 0 | 0           | 0 | -0.12847785  |
| cov2_3_6_7_9_10  | 34.5022 | -452.343 | 0.314742  | 0 | 0           | 0 | -0.1209787   |
| cov2_3_4_6_8_9   | 34.5266 | -452.355 | 0.3157517 | 0 | 0           | 0 | -0.12916179  |
| cov2_5_6_7_9_11  | 34.5271 | -452.355 | 0.3159155 | 0 | 0           | 0 | -0.11699103  |
| cov2_3_6_8_9_10  | 34.5331 | -452.358 | 0.3148155 | 0 | 0           | 0 | -0.12138024  |
| cov2_5_6_8_9_11  | 34.5338 | -452.359 | 0.3158971 | 0 | 0           | 0 | -0.11709823  |

|                  |         |          |           |   |              |   |              |
|------------------|---------|----------|-----------|---|--------------|---|--------------|
| cov1_2_4_5_9_11  | 34.5523 | -452.368 | 0.3198149 | 0 | -0.12322909  | 0 | -0.076679174 |
| cov2_3_6_7_10_11 | 34.5927 | -452.388 | 0.3157668 | 0 | 0            | 0 | -0.12627441  |
| cov2_5_6_9_10_11 | 34.595  | -452.389 | 0.3155353 | 0 | 0            | 0 | -0.11810676  |
| cov1_2_5_9_10_11 | 34.5959 | -452.39  | 0.3194941 | 0 | -0.13761601  | 0 | -0.061960887 |
| cov1_2_3_5_9_11  | 34.6    | -452.392 | 0.3190669 | 0 | -0.13493324  | 0 | -0.061231885 |
| cov1_2_5_7_9_11  | 34.6034 | -452.394 | 0.3194914 | 0 | -0.13622184  | 0 | -0.061475405 |
| cov1_2_5_8_9_11  | 34.6042 | -452.394 | 0.3194663 | 0 | -0.13666035  | 0 | -0.061480482 |
| cov2_4_6_7_9_11  | 34.6046 | -452.394 | 0.3192547 | 0 | 0            | 0 | -0.14834884  |
| cov2_4_6_8_9_11  | 34.6154 | -452.4   | 0.3192245 | 0 | 0            | 0 | -0.14834468  |
| cov1_2_4_5_10_11 | 34.6162 | -452.4   | 0.3200523 | 0 | -0.12695457  | 0 | -0.076131272 |
| cov2_3_5_6_10_11 | 34.6202 | -452.402 | 0.3136274 | 0 | 0            | 0 | -0.11388508  |
| cov2_3_6_8_10_11 | 34.622  | -452.403 | 0.3158452 | 0 | 0            | 0 | -0.12670617  |
| cov2_5_6_7_8_9   | 34.6314 | -452.408 | 0.3152747 | 0 | 0            | 0 | -0.11138023  |
| cov2_5_6_7_9_10  | 34.6484 | -452.416 | 0.3152839 | 0 | 0            | 0 | -0.11153468  |
| cov2_3_6_7_8_10  | 34.6507 | -452.417 | 0.3150703 | 0 | 0            | 0 | -0.1200425   |
| cov2_5_6_8_9_10  | 34.6573 | -452.421 | 0.315269  | 0 | 0            | 0 | -0.11160753  |
| cov1_2_4_7_9_11  | 34.6583 | -452.421 | 0.3195905 | 0 | -0.080838739 | 0 | -0.093688836 |
| cov2_3_4_6_7_10  | 34.6589 | -452.421 | 0.3160654 | 0 | 0            | 0 | -0.12918638  |
| cov2_4_6_7_8_9   | 34.6595 | -452.422 | 0.3185301 | 0 | 0            | 0 | -0.14228159  |
| cov1_2_3_5_10_11 | 34.664  | -452.424 | 0.3193411 | 0 | -0.13880179  | 0 | -0.060830201 |
| cov1_2_4_8_9_11  | 34.6647 | -452.424 | 0.3195476 | 0 | -0.081157757 | 0 | -0.093525205 |
| cov1_2_5_7_10_11 | 34.6667 | -452.425 | 0.3197319 | 0 | -0.13984781  | 0 | -0.061048262 |
| cov1_2_5_8_10_11 | 34.6674 | -452.426 | 0.3197067 | 0 | -0.14028446  | 0 | -0.061052769 |
| cov1_2_3_4_9_11  | 34.6802 | -452.432 | 0.3187792 | 0 | -0.083209821 | 0 | -0.0906188   |
| cov2_4_6_7_9_10  | 34.683  | -452.433 | 0.3185777 | 0 | 0            | 0 | -0.14304856  |
| cov1_2_4_9_10_11 | 34.6834 | -452.434 | 0.3192474 | 0 | -0.083087858 | 0 | -0.092848776 |
| cov2_3_4_6_8_10  | 34.6885 | -452.436 | 0.3161685 | 0 | 0            | 0 | -0.12986546  |
| cov2_4_6_8_9_10  | 34.6959 | -452.44  | 0.3185417 | 0 | 0            | 0 | -0.14299328  |
| cov2_5_6_7_10_11 | 34.6977 | -452.441 | 0.316199  | 0 | 0            | 0 | -0.11607846  |
| cov2_6_7_8_9_11  | 34.7013 | -452.443 | 0.3176355 | 0 | 0            | 0 | -0.12823939  |
| cov2_5_6_8_10_11 | 34.7046 | -452.444 | 0.3161815 | 0 | 0            | 0 | -0.11618638  |
| cov2_3_5_6_9_10  | 34.7094 | -452.447 | 0.3129701 | 0 | 0            | 0 | -0.10848033  |
| cov2_3_4_6_9_11  | 34.711  | -452.447 | 0.3181232 | 0 | 0            | 0 | -0.14531664  |
| cov2_4_6_9_10_11 | 34.7123 | -452.448 | 0.318608  | 0 | 0            | 0 | -0.14773194  |
| cov2_6_7_9_10_11 | 34.7255 | -452.455 | 0.317681  | 0 | 0            | 0 | -0.12891964  |
| cov1_2_4_7_10_11 | 34.7285 | -452.456 | 0.3198141 | 0 | -0.083249353 | 0 | -0.09339054  |
| cov2_6_8_9_10_11 | 34.7338 | -452.459 | 0.3176678 | 0 | 0            | 0 | -0.12909391  |
| cov1_2_4_8_10_11 | 34.735  | -452.459 | 0.3197665 | 0 | -0.083566925 | 0 | -0.09322222  |
| cov1_2_3_4_10_11 | 34.7522 | -452.468 | 0.3190329 | 0 | -0.085689532 | 0 | -0.090453781 |
| cov2_3_6_9_10_11 | 34.7642 | -452.474 | 0.3165708 | 0 | 0            | 0 | -0.13089866  |
| cov2_4_6_7_10_11 | 34.7701 | -452.477 | 0.319619  | 0 | 0            | 0 | -0.14848665  |
| cov2_4_6_8_10_11 | 34.7812 | -452.483 | 0.3195886 | 0 | 0            | 0 | -0.14848371  |
| cov2_6_7_8_9_10  | 34.7833 | -452.484 | 0.3169412 | 0 | 0            | 0 | -0.1227072   |
| cov2_5_6_7_8_10  | 34.7894 | -452.487 | 0.315571  | 0 | 0            | 0 | -0.11070025  |
| cov2_4_6_7_8_10  | 34.8162 | -452.5   | 0.3189118 | 0 | 0            | 0 | -0.14261519  |
| cov1_2_3_7_9_11  | 34.8389 | -452.511 | 0.3143526 | 0 | -0.063335205 | 0 | -0.056237677 |
| cov2_3_4_6_9_10  | 34.86   | -452.522 | 0.3174528 | 0 | 0            | 0 | -0.13939823  |

|                  |         |          |           |   |              |   |              |
|------------------|---------|----------|-----------|---|--------------|---|--------------|
| cov1_2_3_8_9_11  | 34.8652 | -452.524 | 0.3144256 | 0 | -0.063887623 | 0 | -0.056268693 |
| cov2_6_7_8_10_11 | 34.8737 | -452.529 | 0.3179499 | 0 | 0            | 0 | -0.12764589  |
| cov2_3_4_6_10_11 | 34.8831 | -452.533 | 0.3185288 | 0 | 0            | 0 | -0.14565826  |
| cov1_2_3_7_10_11 | 34.9225 | -452.553 | 0.3145513 | 0 | -0.065735116 | 0 | -0.055489221 |
| cov1_2_3_8_10_11 | 34.9487 | -452.566 | 0.3146247 | 0 | -0.066292433 | 0 | -0.055509562 |
| cov1_2_5_7_8_11  | 34.9566 | -452.57  | 0.322043  | 0 | -0.17703683  | 0 | -0.065083954 |
| cov1_2_4_5_7_11  | 34.9577 | -452.571 | 0.3225471 | 0 | -0.16431296  | 0 | -0.078903007 |
| cov1_2_4_5_8_11  | 34.9609 | -452.572 | 0.322511  | 0 | -0.16508236  | 0 | -0.078563185 |
| cov1_2_3_4_5_11  | 34.9659 | -452.575 | 0.3222207 | 0 | -0.16757062  | 0 | -0.076878673 |
| cov1_2_3_5_7_11  | 34.9738 | -452.579 | 0.3208181 | 0 | -0.16490389  | 0 | -0.063970846 |
| cov1_2_3_5_8_11  | 34.982  | -452.583 | 0.3209982 | 0 | -0.16734257  | 0 | -0.064142724 |
| cov1_2_3_9_10_11 | 35.0333 | -452.609 | 0.3151418 | 0 | -0.069448623 | 0 | -0.056877204 |
| cov1_3_4_5_9_11  | 35.0572 | -452.62  | 0.3172114 | 0 | -0.1791916   | 0 | 0            |
| cov1_4_5_9_10_11 | 35.0734 | -452.629 | 0.3180577 | 0 | -0.18439068  | 0 | 0            |
| cov1_4_5_8_9_11  | 35.075  | -452.629 | 0.3179773 | 0 | -0.18477572  | 0 | 0            |
| cov1_4_5_7_9_11  | 35.0764 | -452.63  | 0.3180028 | 0 | -0.18430351  | 0 | 0            |
| cov1_2_7_8_9_11  | 35.1111 | -452.647 | 0.3166389 | 0 | -0.064094469 | 0 | -0.057261465 |
| cov1_3_4_5_10_11 | 35.1155 | -452.65  | 0.3174704 | 0 | -0.1822981   | 0 | 0            |
| cov1_5_7_8_9_11  | 35.1161 | -452.65  | 0.3180304 | 0 | -0.17988034  | 0 | 0            |
| cov1_3_5_7_9_11  | 35.1228 | -452.653 | 0.3165393 | 0 | -0.16403079  | 0 | 0            |
| cov1_4_5_8_10_11 | 35.1316 | -452.658 | 0.318195  | 0 | -0.18750887  | 0 | 0            |
| cov1_4_5_7_10_11 | 35.1329 | -452.658 | 0.3182199 | 0 | -0.18704012  | 0 | 0            |
| cov1_3_5_8_9_11  | 35.1333 | -452.659 | 0.3167246 | 0 | -0.16671615  | 0 | 0            |
| cov2_3_4_7_9_11  | 35.1513 | -452.668 | 0.3171907 | 0 | 0            | 0 | -0.11379495  |
| cov1_3_5_9_10_11 | 35.1515 | -452.668 | 0.3174704 | 0 | -0.17814933  | 0 | 0            |
| cov2_4_5_7_9_11  | 35.1526 | -452.668 | 0.3193494 | 0 | 0            | 0 | -0.12635365  |
| cov1_2_7_9_10_11 | 35.1582 | -452.671 | 0.3166934 | 0 | -0.064433813 | 0 | -0.05719881  |
| cov1_2_8_9_10_11 | 35.1603 | -452.672 | 0.3166649 | 0 | -0.0647909   | 0 | -0.057197199 |
| cov1_5_7_9_10_11 | 35.1608 | -452.672 | 0.3180976 | 0 | -0.18067024  | 0 | 0            |
| cov1_5_8_9_10_11 | 35.1616 | -452.673 | 0.3180727 | 0 | -0.1811094   | 0 | 0            |
| cov2_4_5_8_9_11  | 35.1649 | -452.674 | 0.3193065 | 0 | 0            | 0 | -0.12631768  |
| cov1_2_3_4_7_11  | 35.1676 | -452.676 | 0.3196885 | 0 | -0.094610864 | 0 | -0.096717178 |
| cov1_5_7_8_10_11 | 35.1707 | -452.677 | 0.318237  | 0 | -0.18238926  | 0 | 0            |
| cov1_3_5_7_10_11 | 35.1805 | -452.682 | 0.3168267 | 0 | -0.1674834   | 0 | 0            |
| cov2_3_4_8_9_11  | 35.1808 | -452.682 | 0.3173183 | 0 | 0            | 0 | -0.1146274   |
| cov1_3_5_8_10_11 | 35.1905 | -452.687 | 0.3170084 | 0 | -0.17011547  | 0 | 0            |
| cov1_2_7_8_10_11 | 35.1906 | -452.687 | 0.3168298 | 0 | -0.066658915 | 0 | -0.05625441  |
| cov1_2_3_4_8_11  | 35.1955 | -452.69  | 0.3198279 | 0 | -0.095511838 | 0 | -0.097293116 |
| cov2_3_7_8_9_11  | 35.1985 | -452.691 | 0.3149589 | 0 | 0            | 0 | -0.091084493 |
| cov2_3_5_7_9_11  | 35.2177 | -452.701 | 0.3139365 | 0 | 0            | 0 | -0.082410165 |
| cov2_3_4_5_9_11  | 35.2272 | -452.706 | 0.318022  | 0 | 0            | 0 | -0.12308509  |
| cov2_4_5_9_10_11 | 35.2384 | -452.711 | 0.3187391 | 0 | 0            | 0 | -0.12612533  |
| cov2_4_7_8_9_11  | 35.2408 | -452.712 | 0.3196483 | 0 | 0            | 0 | -0.12664005  |
| cov2_3_7_9_10_11 | 35.2428 | -452.713 | 0.31497   | 0 | 0            | 0 | -0.091399962 |
| cov2_4_5_7_10_11 | 35.2538 | -452.719 | 0.3196027 | 0 | 0            | 0 | -0.12697824  |
| cov2_3_5_8_9_11  | 35.2547 | -452.719 | 0.3140766 | 0 | 0            | 0 | -0.08320097  |
| cov1_3_7_8_9_11  | 35.2618 | -452.723 | 0.313172  | 0 | -0.10796557  | 0 | 0            |

|                  |         |          |           |   |              |   |              |
|------------------|---------|----------|-----------|---|--------------|---|--------------|
| cov2_3_4_7_10_11 | 35.266  | -452.725 | 0.3174945 | 0 | 0            | 0 | -0.11496493  |
| cov2_4_5_8_10_11 | 35.2664 | -452.725 | 0.3195594 | 0 | 0            | 0 | -0.12694085  |
| cov2_3_8_9_10_11 | 35.2772 | -452.731 | 0.315059  | 0 | 0            | 0 | -0.091762799 |
| cov2_4_7_9_10_11 | 35.29   | -452.737 | 0.3197181 | 0 | 0            | 0 | -0.1271474   |
| cov2_3_4_8_10_11 | 35.2958 | -452.74  | 0.3176225 | 0 | 0            | 0 | -0.11578425  |
| cov2_4_8_9_10_11 | 35.3017 | -452.743 | 0.3196755 | 0 | 0            | 0 | -0.12710876  |
| cov1_3_7_9_10_11 | 35.309  | -452.746 | 0.3132154 | 0 | -0.1082284   | 0 | 0            |
| cov1_3_4_7_9_11  | 35.3098 | -452.747 | 0.3132774 | 0 | -0.10887179  | 0 | 0            |
| cov2_3_7_8_10_11 | 35.3174 | -452.751 | 0.315226  | 0 | 0            | 0 | -0.091813666 |
| cov1_2_4_7_8_11  | 35.3207 | -452.752 | 0.323     | 0 | -0.10300086  | 0 | -0.11110708  |
| cov2_3_5_7_10_11 | 35.3326 | -452.758 | 0.3141458 | 0 | 0            | 0 | -0.082646666 |
| cov1_3_7_8_10_11 | 35.333  | -452.758 | 0.3133786 | 0 | -0.1096315   | 0 | 0            |
| cov2_3_4_5_10_11 | 35.3347 | -452.759 | 0.3182993 | 0 | 0            | 0 | -0.12389193  |
| cov1_3_8_9_10_11 | 35.3359 | -452.76  | 0.3132879 | 0 | -0.10881031  | 0 | 0            |
| cov1_3_4_8_9_11  | 35.3364 | -452.76  | 0.3133762 | 0 | -0.10982989  | 0 | 0            |
| cov2_3_4_5_6_7   | 35.3422 | -452.763 | 0.3165535 | 0 | 0            | 0 | -0.14943172  |
| cov2_4_7_8_10_11 | 35.3554 | -452.77  | 0.3199459 | 0 | 0            | 0 | -0.12756118  |
| cov2_3_4_9_10_11 | 35.3636 | -452.774 | 0.3186815 | 0 | 0            | 0 | -0.12483658  |
| cov2_3_5_8_10_11 | 35.37   | -452.777 | 0.314286  | 0 | 0            | 0 | -0.083423963 |
| cov1_3_4_7_10_11 | 35.38   | -452.782 | 0.3135407 | 0 | -0.11131375  | 0 | 0            |
| cov2_3_4_5_6_8   | 35.3956 | -452.79  | 0.3167077 | 0 | 0            | 0 | -0.15043442  |
| cov3_5_6_7_9_11  | 35.4004 | -452.792 | 0.305178  | 0 | 0            | 0 | 0            |
| cov1_3_4_8_10_11 | 35.4062 | -452.795 | 0.3136392 | 0 | -0.11226113  | 0 | 0            |
| cov3_4_5_6_7_9   | 35.4333 | -452.809 | 0.3049999 | 0 | 0            | 0 | 0            |
| cov3_5_6_7_8_9   | 35.4406 | -452.812 | 0.3051916 | 0 | 0            | 0 | 0            |
| cov1_3_4_5_7_11  | 35.4552 | -452.82  | 0.3189468 | 0 | -0.21262677  | 0 | 0            |
| cov1_4_5_7_8_11  | 35.4588 | -452.821 | 0.3205472 | 0 | -0.22995936  | 0 | 0            |
| cov3_5_6_7_9_10  | 35.4592 | -452.822 | 0.3051787 | 0 | 0            | 0 | 0            |
| cov3_5_6_8_9_11  | 35.4607 | -452.822 | 0.3052662 | 0 | 0            | 0 | 0            |
| cov1_3_4_5_8_11  | 35.4633 | -452.824 | 0.319116  | 0 | -0.21518722  | 0 | 0            |
| cov3_4_5_6_8_9   | 35.4921 | -452.838 | 0.3050854 | 0 | 0            | 0 | 0            |
| cov1_3_4_9_10_11 | 35.5047 | -452.844 | 0.3143966 | 0 | -0.12032106  | 0 | 0            |
| cov3_5_6_8_9_10  | 35.5191 | -452.851 | 0.3052718 | 0 | 0            | 0 | 0            |
| cov2_5_7_8_9_11  | 35.5273 | -452.856 | 0.3176111 | 0 | 0            | 0 | -0.09602637  |
| cov2_7_8_9_10_11 | 35.5329 | -452.858 | 0.31733   | 0 | 0            | 0 | -0.092750426 |
| cov1_3_5_7_8_11  | 35.5369 | -452.86  | 0.3190986 | 0 | -0.20904548  | 0 | 0            |
| cov2_3_5_9_10_11 | 35.5374 | -452.861 | 0.3158539 | 0 | 0            | 0 | -0.094369894 |
| cov1_4_7_8_9_11  | 35.547  | -452.865 | 0.3161053 | 0 | -0.12232253  | 0 | 0            |
| cov1_2_5_7_8_9   | 35.5479 | -452.866 | 0.3175389 | 0 | -0.082801571 | 0 | -0.054819535 |
| cov1_2_4_5_7_9   | 35.5495 | -452.867 | 0.3180268 | 0 | -0.067397908 | 0 | -0.07036569  |
| cov3_5_6_7_10_11 | 35.5624 | -452.873 | 0.3055236 | 0 | 0            | 0 | 0            |
| cov1_2_4_5_8_9   | 35.5657 | -452.875 | 0.3179725 | 0 | -0.068030552 | 0 | -0.069872046 |
| cov1_2_3_7_8_11  | 35.5754 | -452.88  | 0.3153418 | 0 | -0.078993598 | 0 | -0.058451162 |
| cov1_2_3_5_7_9   | 35.578  | -452.881 | 0.316395  | 0 | -0.071462566 | 0 | -0.053768547 |
| cov2_5_7_9_10_11 | 35.578  | -452.881 | 0.3176749 | 0 | 0            | 0 | -0.096299736 |
| cov1_2_3_4_7_9   | 35.5784 | -452.881 | 0.3158291 | 0 | -0.026369888 | 0 | -0.077446983 |
| cov2_5_8_9_10_11 | 35.5855 | -452.885 | 0.317644  | 0 | 0            | 0 | -0.096429113 |

|                  |         |          |           |   |              |              |
|------------------|---------|----------|-----------|---|--------------|--------------|
| cov3_4_5_6_7_10  | 35.5921 | -452.888 | 0.3053568 | 0 | 0            | 0            |
| cov1_4_7_9_10_11 | 35.5926 | -452.888 | 0.3161546 | 0 | -0.12251568  | 0            |
| cov3_5_6_7_8_10  | 35.5937 | -452.889 | 0.3055273 | 0 | 0            | 0            |
| cov1_4_8_9_10_11 | 35.5958 | -452.89  | 0.3161195 | 0 | -0.12274303  | 0            |
| cov1_7_8_9_10_11 | 35.5972 | -452.891 | 0.315525  | 0 | -0.10990834  | 0            |
| cov1_2_5_7_9_10  | 35.5987 | -452.891 | 0.3176064 | 0 | -0.083252202 | -0.054994247 |
| cov1_2_3_5_8_9   | 35.5996 | -452.892 | 0.3165998 | 0 | -0.074008675 | -0.053916507 |
| cov1_2_4_7_8_9   | 35.5996 | -452.892 | 0.3175912 | 0 | -0.030027976 | -0.085438497 |
| cov1_2_5_7_8_10  | 35.6026 | -452.893 | 0.3177457 | 0 | -0.086041032 | -0.054299497 |
| cov1_2_4_5_7_10  | 35.6036 | -452.894 | 0.3182312 | 0 | -0.07056781  | -0.069839502 |
| cov1_4_7_8_10_11 | 35.6053 | -452.895 | 0.3163035 | 0 | -0.12428396  | 0            |
| cov2_3_4_7_8_9   | 35.61   | -452.897 | 0.3158474 | 0 | 0            | -0.091585593 |
| cov1_2_3_4_8_9   | 35.6119 | -452.898 | 0.3159449 | 0 | -0.026794877 | -0.077925774 |
| cov1_2_5_8_9_10  | 35.6121 | -452.898 | 0.3175711 | 0 | -0.083431431 | -0.05494814  |
| cov1_2_4_5_8_10  | 35.6197 | -452.902 | 0.3181782 | 0 | -0.071194801 | -0.069345783 |
| cov3_5_6_8_10_11 | 35.6225 | -452.903 | 0.3056145 | 0 | 0            | 0            |
| cov1_2_3_5_7_10  | 35.6347 | -452.909 | 0.3166746 | 0 | -0.075459482 | -0.053327326 |
| cov1_2_3_4_7_10  | 35.6398 | -452.912 | 0.3160777 | 0 | -0.029020376 | -0.077309926 |
| cov2_5_7_8_10_11 | 35.6462 | -452.915 | 0.3178368 | 0 | 0            | -0.096026874 |
| cov1_2_3_4_5_9   | 35.6498 | -452.917 | 0.3185075 | 0 | -0.082292061 | -0.06715637  |
| cov2_3_4_5_7_9   | 35.6508 | -452.917 | 0.3155469 | 0 | 0            | -0.089116294 |
| cov3_4_5_6_8_10  | 35.6508 | -452.917 | 0.3054421 | 0 | 0            | 0            |
| cov1_2_4_7_9_10  | 35.6545 | -452.919 | 0.317639  | 0 | -0.030147058 | -0.085361172 |
| cov1_2_3_5_8_10  | 35.6556 | -452.92  | 0.3168754 | 0 | -0.077952338 | -0.053469899 |
| cov1_2_4_7_8_10  | 35.6576 | -452.921 | 0.317789  | 0 | -0.032613911 | -0.084933434 |
| cov2_3_4_7_9_10  | 35.6635 | -452.924 | 0.3158748 | 0 | 0            | -0.091674256 |
| cov2_3_5_6_7_11  | 35.668  | -452.926 | 0.3141939 | 0 | 0            | -0.11715537  |
| cov1_2_3_4_8_10  | 35.6729 | -452.928 | 0.3161925 | 0 | -0.029447511 | -0.077769767 |
| cov1_2_4_8_9_10  | 35.6742 | -452.929 | 0.3175777 | 0 | -0.030180372 | -0.085091859 |
| cov1_2_3_5_9_10  | 35.6789 | -452.931 | 0.3180241 | 0 | -0.092401414 | -0.055277021 |
| cov2_3_4_5_8_9   | 35.6891 | -452.936 | 0.3156886 | 0 | 0            | -0.089990145 |
| cov1_2_4_5_9_10  | 35.691  | -452.937 | 0.3171121 | 0 | -0.0772825   | -0.062945782 |
| cov2_3_4_7_8_10  | 35.6919 | -452.938 | 0.3161434 | 0 | 0            | -0.093121821 |
| cov2_3_4_8_9_10  | 35.7003 | -452.942 | 0.3159982 | 0 | 0            | -0.092391072 |
| cov1_2_3_4_5_10  | 35.7015 | -452.943 | 0.3187375 | 0 | -0.085437237 | -0.066735838 |
| cov2_4_5_7_8_9   | 35.7111 | -452.947 | 0.3178951 | 0 | 0            | -0.10238943  |
| cov2_4_7_8_9_10  | 35.7161 | -452.95  | 0.3180343 | 0 | 0            | -0.10358001  |
| cov2_3_5_6_8_11  | 35.7243 | -452.954 | 0.3143501 | 0 | 0            | -0.11805503  |
| cov2_3_4_5_7_10  | 35.7263 | -452.955 | 0.315775  | 0 | 0            | -0.09013992  |
| cov2_3_4_6_7_11  | 35.7408 | -452.962 | 0.3192417 | 0 | 0            | -0.15239732  |
| cov1_2_3_7_8_9   | 35.7454 | -452.965 | 0.3126301 | 0 | -0.014255726 | -0.049943458 |
| cov2_3_5_7_8_9   | 35.7557 | -452.97  | 0.313855  | 0 | 0            | -0.069102918 |
| cov2_3_4_5_8_10  | 35.7647 | -452.974 | 0.3159158 | 0 | 0            | -0.091001499 |
| cov2_4_5_7_9_10  | 35.7667 | -452.975 | 0.317949  | 0 | 0            | -0.10245232  |
| cov2_3_7_8_9_10  | 35.772  | -452.978 | 0.3129716 | 0 | 0            | -0.061120952 |
| cov2_3_4_6_8_11  | 35.7863 | -452.985 | 0.3193923 | 0 | 0            | -0.15341247  |
| cov2_4_5_8_9_10  | 35.7872 | -452.986 | 0.3178939 | 0 | 0            | -0.10224385  |

|                 |         |          |           |   |              |   |              |
|-----------------|---------|----------|-----------|---|--------------|---|--------------|
| cov2_4_5_7_8_10 | 35.7876 | -452.986 | 0.318129  | 0 | 0            | 0 | -0.10330442  |
| cov1_2_3_7_9_10 | 35.7992 | -452.992 | 0.3126734 | 0 | -0.014282978 | 0 | -0.049985724 |
| cov2_3_5_7_9_10 | 35.8086 | -452.996 | 0.3139044 | 0 | 0            | 0 | -0.069369212 |
| cov1_2_3_7_8_10 | 35.8161 | -453     | 0.312832  | 0 | -0.016923971 | 0 | -0.049176403 |
| cov2_3_4_6_7_8  | 35.8261 | -453.005 | 0.3185327 | 0 | 0            | 0 | -0.14592075  |
| cov2_3_5_6_7_8  | 35.8262 | -453.005 | 0.3138062 | 0 | 0            | 0 | -0.11136583  |
| cov2_3_6_7_8_11 | 35.8388 | -453.011 | 0.3168338 | 0 | 0            | 0 | -0.12985062  |
| cov1_2_3_8_9_10 | 35.8412 | -453.013 | 0.3127411 | 0 | -0.014535766 | 0 | -0.049945857 |
| cov2_3_5_7_8_10 | 35.8428 | -453.013 | 0.3140337 | 0 | 0            | 0 | -0.069521045 |
| cov1_2_3_4_9_10 | 35.8454 | -453.015 | 0.3172744 | 0 | -0.031688297 | 0 | -0.084440961 |
| cov2_3_5_8_9_10 | 35.8486 | -453.016 | 0.3140446 | 0 | 0            | 0 | -0.070142054 |
| cov2_3_4_5_7_11 | 35.8871 | -453.035 | 0.3186054 | 0 | 0            | 0 | -0.13305384  |
| cov1_4_5_7_8_9  | 35.931  | -453.057 | 0.3163468 | 0 | -0.12817036  | 0 | 0            |
| cov2_3_4_5_8_11 | 35.9388 | -453.061 | 0.3187851 | 0 | 0            | 0 | -0.13419711  |
| cov2_4_5_6_7_11 | 35.941  | -453.062 | 0.3247875 | 0 | 0            | 0 | -0.18904494  |
| cov1_3_4_5_7_9  | 35.9439 | -453.064 | 0.3148945 | 0 | -0.11242096  | 0 | 0            |
| cov1_3_5_7_8_9  | 35.9535 | -453.069 | 0.3148789 | 0 | -0.10868461  | 0 | 0            |
| cov2_4_5_6_8_11 | 35.9575 | -453.071 | 0.324763  | 0 | 0            | 0 | -0.18911404  |
| cov1_2_4_5_7_8  | 35.9644 | -453.074 | 0.3206928 | 0 | -0.11325597  | 0 | -0.071107221 |
| cov1_3_4_5_8_9  | 35.965  | -453.074 | 0.315091  | 0 | -0.11511156  | 0 | 0            |
| cov1_2_3_5_7_8  | 35.9695 | -453.077 | 0.3189285 | 0 | -0.11199924  | 0 | -0.057306572 |
| cov2_5_7_8_9_10 | 35.9713 | -453.078 | 0.3167438 | 0 | 0            | 0 | -0.081501096 |
| cov2_3_4_5_9_10 | 35.9739 | -453.079 | 0.3174682 | 0 | 0            | 0 | -0.10206121  |
| cov1_4_5_7_8_10 | 35.979  | -453.081 | 0.3165362 | 0 | -0.13051885  | 0 | 0            |
| cov1_4_5_7_9_10 | 35.982  | -453.083 | 0.3164006 | 0 | -0.12853311  | 0 | 0            |
| cov1_2_3_4_5_7  | 35.9852 | -453.084 | 0.3194191 | 0 | -0.10097757  | 0 | -0.069517226 |
| cov1_4_5_8_9_10 | 35.9924 | -453.088 | 0.3163621 | 0 | -0.12872367  | 0 | 0            |
| cov1_3_4_5_7_10 | 35.995  | -453.089 | 0.3151645 | 0 | -0.11571757  | 0 | 0            |
| cov1_5_7_8_9_10 | 35.9955 | -453.09  | 0.3164458 | 0 | -0.12526121  | 0 | 0            |
| cov1_3_5_7_8_10 | 36.0028 | -453.093 | 0.3151454 | 0 | -0.11189647  | 0 | 0            |
| cov1_3_5_7_9_10 | 36.0058 | -453.095 | 0.3149387 | 0 | -0.10904232  | 0 | 0            |
| cov1_2_3_4_5_8  | 36.0096 | -453.097 | 0.3196049 | 0 | -0.10386736  | 0 | -0.069263464 |
| cov1_3_4_5_8_10 | 36.0155 | -453.1   | 0.3153572 | 0 | -0.11835388  | 0 | 0            |
| cov2_3_4_7_8_11 | 36.0217 | -453.103 | 0.3194429 | 0 | 0            | 0 | -0.13594042  |
| cov1_3_5_8_9_10 | 36.0299 | -453.107 | 0.3151555 | 0 | -0.11176962  | 0 | 0            |
| cov1_3_4_5_9_10 | 36.0425 | -453.113 | 0.3164296 | 0 | -0.13429332  | 0 | 0            |
| cov1_2_7_8_9_10 | 36.0503 | -453.117 | 0.3148544 | 0 | -0.015911111 | 0 | -0.05076282  |
| cov1_3_4_7_8_11 | 36.0638 | -453.124 | 0.3149095 | 0 | -0.13419967  | 0 | 0            |
| cov2_4_5_6_7_8  | 36.0974 | -453.141 | 0.3237793 | 0 | 0            | 0 | -0.17894441  |
| cov1_3_4_7_8_9  | 36.1184 | -453.151 | 0.3119014 | 0 | -0.058522404 | 0 | 0            |
| cov1_3_7_8_9_10 | 36.1192 | -453.151 | 0.3117775 | 0 | -0.056839776 | 0 | 0            |
| cov1_2_3_4_7_8  | 36.1649 | -453.174 | 0.3177594 | 0 | -0.043334095 | 0 | -0.088647429 |
| cov1_3_4_7_9_10 | 36.172  | -453.178 | 0.3119596 | 0 | -0.058658559 | 0 | 0            |
| cov1_3_4_7_8_10 | 36.1766 | -453.18  | 0.3121621 | 0 | -0.061164024 | 0 | 0            |
| cov2_3_4_5_6_11 | 36.1783 | -453.181 | 0.3220441 | 0 | 0            | 0 | -0.18150824  |
| cov1_3_4_8_9_10 | 36.2128 | -453.198 | 0.3120594 | 0 | -0.059321941 | 0 | 0            |
| cov2_4_6_7_8_11 | 36.2174 | -453.201 | 0.3246812 | 0 | 0            | 0 | -0.17794719  |

|                  |         |          |           |   |              |   |             |
|------------------|---------|----------|-----------|---|--------------|---|-------------|
| cov2_3_5_7_8_11  | 36.2348 | -453.209 | 0.3160186 | 0 | 0            | 0 | -0.10102924 |
| cov3_5_7_8_9_11  | 36.2901 | -453.237 | 0.3090215 | 0 | 0            | 0 | 0           |
| cov3_4_6_7_8_9   | 36.2907 | -453.237 | 0.3086155 | 0 | 0            | 0 | 0           |
| cov3_4_5_7_9_11  | 36.3163 | -453.25  | 0.3089414 | 0 | 0            | 0 | 0           |
| cov3_4_6_7_9_10  | 36.3261 | -453.255 | 0.3086001 | 0 | 0            | 0 | 0           |
| cov3_4_6_7_9_11  | 36.3272 | -453.256 | 0.3086607 | 0 | 0            | 0 | 0           |
| cov3_5_7_9_10_11 | 36.3437 | -453.264 | 0.3090703 | 0 | 0            | 0 | 0           |
| cov2_4_5_7_8_11  | 36.3469 | -453.265 | 0.3242458 | 0 | 0            | 0 | -0.16261336 |
| cov1_3_4_5_7_8   | 36.3593 | -453.272 | 0.317394  | 0 | -0.15726925  | 0 | 0           |
| cov3_4_5_8_9_11  | 36.3748 | -453.279 | 0.3090438 | 0 | 0            | 0 | 0           |
| cov3_4_6_8_9_10  | 36.3781 | -453.281 | 0.3086849 | 0 | 0            | 0 | 0           |
| cov3_4_6_8_9_11  | 36.3789 | -453.281 | 0.3087477 | 0 | 0            | 0 | 0           |
| cov1_4_7_8_9_10  | 36.3794 | -453.282 | 0.3146408 | 0 | -0.072333383 | 0 | 0           |
| cov2_3_4_5_7_8   | 36.4002 | -453.292 | 0.3178258 | 0 | 0            | 0 | -0.11241601 |
| cov3_5_8_9_10_11 | 36.4037 | -453.294 | 0.3091771 | 0 | 0            | 0 | 0           |
| cov3_5_7_8_10_11 | 36.4062 | -453.295 | 0.3092315 | 0 | 0            | 0 | 0           |
| cov3_4_5_7_10_11 | 36.4358 | -453.31  | 0.3091595 | 0 | 0            | 0 | 0           |
| cov3_4_6_7_8_10  | 36.4689 | -453.326 | 0.3090167 | 0 | 0            | 0 | 0           |
| cov3_4_5_8_10_11 | 36.4944 | -453.339 | 0.3092624 | 0 | 0            | 0 | 0           |
| cov3_4_6_7_10_11 | 36.5072 | -453.345 | 0.3090487 | 0 | 0            | 0 | 0           |
| cov3_4_5_6_9_11  | 36.5559 | -453.37  | 0.3083769 | 0 | 0            | 0 | 0           |
| cov3_4_6_8_10_11 | 36.559  | -453.371 | 0.309134  | 0 | 0            | 0 | 0           |
| cov3_4_5_7_8_9   | 36.5608 | -453.372 | 0.3095153 | 0 | 0            | 0 | 0           |
| cov3_4_7_8_9_11  | 36.5659 | -453.375 | 0.3099779 | 0 | 0            | 0 | 0           |
| cov3_5_7_8_9_10  | 36.5884 | -453.386 | 0.3096533 | 0 | 0            | 0 | 0           |
| cov3_4_5_7_9_10  | 36.6164 | -453.4   | 0.3095667 | 0 | 0            | 0 | 0           |
| cov3_5_6_9_10_11 | 36.6178 | -453.401 | 0.308652  | 0 | 0            | 0 | 0           |
| cov3_4_7_9_10_11 | 36.6181 | -453.401 | 0.3100018 | 0 | 0            | 0 | 0           |
| cov3_4_5_6_9_10  | 36.6344 | -453.409 | 0.3083658 | 0 | 0            | 0 | 0           |
| cov3_4_5_7_8_10  | 36.6582 | -453.421 | 0.3096912 | 0 | 0            | 0 | 0           |
| cov3_4_8_9_10_11 | 36.6708 | -453.427 | 0.3100947 | 0 | 0            | 0 | 0           |
| cov3_4_5_8_9_10  | 36.6744 | -453.429 | 0.3096671 | 0 | 0            | 0 | 0           |
| cov3_4_7_8_9_10  | 36.6774 | -453.431 | 0.3100563 | 0 | 0            | 0 | 0           |
| cov3_4_5_6_10_11 | 36.7074 | -453.446 | 0.3086984 | 0 | 0            | 0 | 0           |
| cov3_4_7_8_10_11 | 36.7087 | -453.446 | 0.3102422 | 0 | 0            | 0 | 0           |
| cov5_6_7_8_9_10  | 36.7829 | -453.483 | 0.3121357 | 0 | 0            | 0 | 0           |
| cov4_5_6_7_8_9   | 36.7871 | -453.485 | 0.3121136 | 0 | 0            | 0 | 0           |
| cov5_6_7_8_9_11  | 36.7988 | -453.491 | 0.3122465 | 0 | 0            | 0 | 0           |
| cov4_5_6_7_9_10  | 36.8001 | -453.492 | 0.3120777 | 0 | 0            | 0 | 0           |
| cov5_6_7_9_10_11 | 36.811  | -453.497 | 0.3121995 | 0 | 0            | 0 | 0           |
| cov4_5_6_8_9_10  | 36.8112 | -453.498 | 0.3120428 | 0 | 0            | 0 | 0           |
| cov4_5_6_7_9_11  | 36.8151 | -453.499 | 0.3121789 | 0 | 0            | 0 | 0           |
| cov5_6_8_9_10_11 | 36.8224 | -453.503 | 0.3121695 | 0 | 0            | 0 | 0           |
| cov4_5_6_8_9_11  | 36.8259 | -453.505 | 0.3121486 | 0 | 0            | 0 | 0           |
| cov2_5_6_7_8_11  | 36.8787 | -453.531 | 0.3226237 | 0 | 0            | 0 | -0.13975128 |
| cov4_5_6_9_10_11 | 36.9033 | -453.544 | 0.3115984 | 0 | 0            | 0 | 0           |
| cov4_5_6_7_8_10  | 36.9104 | -453.547 | 0.3123657 | 0 | 0            | 0 | 0           |



|                    |         |          |           |   |             |   |              |
|--------------------|---------|----------|-----------|---|-------------|---|--------------|
| cov5_6_7_8_10_11   | 36.9191 | -453.551 | 0.312465  | 0 | 0           | 0 | 0            |
| cov4_5_6_7_10_11   | 36.94   | -453.562 | 0.3124126 | 0 | 0           | 0 | 0            |
| cov4_5_6_8_10_11   | 36.951  | -453.567 | 0.3123799 | 0 | 0           | 0 | 0            |
| cov3_4_5_9_10_11   | 37.0465 | -453.615 | 0.3107646 | 0 | 0           | 0 | 0            |
| cov3_4_6_9_10_11   | 37.0663 | -453.625 | 0.3106449 | 0 | 0           | 0 | 0            |
| cov4_5_7_8_9_11    | 37.1775 | -453.681 | 0.3137035 | 0 | 0           | 0 | 0            |
| cov5_7_8_9_10_11   | 37.1852 | -453.684 | 0.3137487 | 0 | 0           | 0 | 0            |
| cov4_6_7_8_9_11    | 37.193  | -453.688 | 0.3134883 | 0 | 0           | 0 | 0            |
| cov4_6_7_8_9_10    | 37.1933 | -453.689 | 0.3135816 | 0 | 0           | 0 | 0            |
| cov4_5_7_9_10_11   | 37.2226 | -453.703 | 0.3137377 | 0 | 0           | 0 | 0            |
| cov4_6_7_9_10_11   | 37.2316 | -453.708 | 0.3135021 | 0 | 0           | 0 | 0            |
| cov4_5_8_9_10_11   | 37.2337 | -453.709 | 0.3137    | 0 | 0           | 0 | 0            |
| cov4_6_8_9_10_11   | 37.2419 | -453.713 | 0.3134692 | 0 | 0           | 0 | 0            |
| cov4_5_7_8_9_10    | 37.2584 | -453.721 | 0.3135928 | 0 | 0           | 0 | 0            |
| cov4_5_7_8_10_11   | 37.2845 | -453.734 | 0.3138965 | 0 | 0           | 0 | 0            |
| cov4_7_8_9_10_11   | 37.3249 | -453.754 | 0.3141088 | 0 | 0           | 0 | 0            |
| cov4_6_7_8_10_11   | 37.3449 | -453.764 | 0.3138016 | 0 | 0           | 0 | 0            |
| cov3_7_8_9_10_11   | 37.4047 | -453.794 | 0.3131893 | 0 | 0           | 0 | 0            |
| cov3_6_7_8_9_11    | 37.4055 | -453.795 | 0.3132208 | 0 | 0           | 0 | 0            |
| cov3_6_7_8_9_10    | 37.427  | -453.805 | 0.3134409 | 0 | 0           | 0 | 0            |
| cov3_6_7_9_10_11   | 37.4643 | -453.824 | 0.3132561 | 0 | 0           | 0 | 0            |
| cov3_6_8_9_10_11   | 37.5176 | -453.851 | 0.3133455 | 0 | 0           | 0 | 0            |
| cov3_6_7_8_10_11   | 37.5551 | -453.869 | 0.3135265 | 0 | 0           | 0 | 0            |
| cov6_7_8_9_10_11   | 37.8199 | -454.002 | 0.3156393 | 0 | 0           | 0 | 0            |
| cov3_4_5_6_7_11    | 37.8473 | -454.016 | 0.3092182 | 0 | 0           | 0 | 0            |
| cov3_4_5_6_7_8     | 37.8482 | -454.016 | 0.3091956 | 0 | 0           | 0 | 0            |
| cov3_5_6_7_8_11    | 37.8744 | -454.029 | 0.3095349 | 0 | 0           | 0 | 0            |
| cov3_4_5_6_8_11    | 37.9403 | -454.062 | 0.3093591 | 0 | 0           | 0 | 0            |
| cov3_4_5_7_8_11    | 37.9679 | -454.076 | 0.310501  | 0 | 0           | 0 | 0            |
| cov3_4_6_7_8_11    | 38.2426 | -454.213 | 0.3113044 | 0 | 0           | 0 | 0            |
| cov1_2_4_5_6_9_11  | 38.4434 | -450.816 | 0.3189664 | 0 | -0.26924218 | 0 | -0.077478851 |
| cov1_2_3_5_6_9_11  | 38.4616 | -450.825 | 0.3181867 | 0 | -0.27677525 | 0 | -0.066801752 |
| cov1_2_5_6_9_10_11 | 38.4637 | -450.826 | 0.3186723 | 0 | -0.27950511 | 0 | -0.067424448 |
| cov1_2_5_6_7_9_11  | 38.4677 | -450.828 | 0.318642  | 0 | -0.27909836 | 0 | -0.067099866 |
| cov1_2_5_6_8_9_11  | 38.4677 | -450.828 | 0.3186385 | 0 | -0.27915142 | 0 | -0.067099962 |
| cov1_2_4_6_7_9_11  | 38.5399 | -450.864 | 0.3187596 | 0 | -0.23192031 | 0 | -0.092504167 |
| cov1_2_4_6_8_9_11  | 38.5406 | -450.865 | 0.3187542 | 0 | -0.23208152 | 0 | -0.092471912 |
| cov1_2_3_4_6_9_11  | 38.5424 | -450.866 | 0.3179279 | 0 | -0.23386024 | 0 | -0.089267745 |
| cov1_2_4_5_6_10_11 | 38.5442 | -450.867 | 0.3192239 | 0 | -0.27233602 | 0 | -0.076674864 |
| cov1_2_4_6_9_10_11 | 38.5511 | -450.87  | 0.3185334 | 0 | -0.23368724 | 0 | -0.091882011 |
| cov1_2_3_5_6_10_11 | 38.5637 | -450.876 | 0.318496  | 0 | -0.28019848 | 0 | -0.066039039 |
| cov1_2_5_6_7_10_11 | 38.5685 | -450.879 | 0.3189018 | 0 | -0.28219166 | 0 | -0.066300415 |
| cov1_2_5_6_8_10_11 | 38.5685 | -450.879 | 0.3188989 | 0 | -0.28224646 | 0 | -0.066301144 |
| cov1_2_3_6_7_9_11  | 38.6272 | -450.908 | 0.314327  | 0 | -0.21976288 | 0 | -0.062801353 |
| cov1_2_3_6_8_9_11  | 38.6315 | -450.91  | 0.3143567 | 0 | -0.22039502 | 0 | -0.062822277 |
| cov1_2_4_6_7_10_11 | 38.6453 | -450.917 | 0.3190097 | 0 | -0.23400772 | 0 | -0.091868985 |
| cov1_2_4_6_8_10_11 | 38.646  | -450.917 | 0.3190034 | 0 | -0.23416805 | 0 | -0.09183838  |

|                    |         |          |           |   |             |   |              |
|--------------------|---------|----------|-----------|---|-------------|---|--------------|
| cov1_2_3_4_6_10_11 | 38.6502 | -450.92  | 0.3182276 | 0 | -0.23601158 | 0 | -0.088850954 |
| cov1_2_3_6_7_10_11 | 38.7469 | -450.968 | 0.3145605 | 0 | -0.22181838 | 0 | -0.061734073 |
| cov1_2_3_6_8_10_11 | 38.7511 | -450.97  | 0.3145901 | 0 | -0.22245109 | 0 | -0.061752112 |
| cov1_2_3_6_9_10_11 | 38.7518 | -450.97  | 0.3149556 | 0 | -0.22621695 | 0 | -0.063331297 |
| cov1_2_6_7_8_9_11  | 38.8532 | -451.021 | 0.3162279 | 0 | -0.22258008 | 0 | -0.063698848 |
| cov1_2_6_7_9_10_11 | 38.8534 | -451.021 | 0.3162363 | 0 | -0.22290123 | 0 | -0.063629681 |
| cov1_2_6_8_9_10_11 | 38.8535 | -451.021 | 0.3162319 | 0 | -0.22296809 | 0 | -0.063628254 |
| cov1_3_4_5_6_9_11  | 38.9513 | -451.07  | 0.3160612 | 0 | -0.3247545  | 0 | 0            |
| cov1_2_6_7_8_10_11 | 38.966  | -451.077 | 0.3164501 | 0 | -0.22476462 | 0 | -0.062449854 |
| cov1_4_5_6_8_9_11  | 38.9745 | -451.082 | 0.3169549 | 0 | -0.33200112 | 0 | 0            |
| cov1_4_5_6_7_9_11  | 38.9748 | -451.082 | 0.3169583 | 0 | -0.33203487 | 0 | 0            |
| cov1_4_5_6_9_10_11 | 38.9796 | -451.084 | 0.3170708 | 0 | -0.33031268 | 0 | 0            |
| cov1_3_4_5_6_10_11 | 39.0442 | -451.117 | 0.3163675 | 0 | -0.32724447 | 0 | 0            |
| cov1_4_5_6_8_10_11 | 39.0644 | -451.127 | 0.3172003 | 0 | -0.33399894 | 0 | 0            |
| cov1_4_5_6_7_10_11 | 39.0647 | -451.127 | 0.3172037 | 0 | -0.33403033 | 0 | 0            |
| cov1_3_5_6_7_9_11  | 39.0998 | -451.144 | 0.3158189 | 0 | -0.30904867 | 0 | 0            |
| cov1_3_5_6_8_9_11  | 39.1015 | -451.145 | 0.3158632 | 0 | -0.30984079 | 0 | 0            |
| cov1_3_5_6_9_10_11 | 39.1217 | -451.155 | 0.3166035 | 0 | -0.32091273 | 0 | 0            |
| cov1_5_6_7_8_9_11  | 39.1344 | -451.162 | 0.3172535 | 0 | -0.32408132 | 0 | 0            |
| cov1_5_6_7_9_10_11 | 39.1351 | -451.162 | 0.3172653 | 0 | -0.32449962 | 0 | 0            |
| cov1_5_6_8_9_10_11 | 39.1351 | -451.162 | 0.3172622 | 0 | -0.32455961 | 0 | 0            |
| cov1_2_4_5_6_7_9   | 39.1451 | -451.167 | 0.3172293 | 0 | -0.23044593 | 0 | -0.071614354 |
| cov1_2_4_5_6_8_9   | 39.1472 | -451.168 | 0.3172217 | 0 | -0.23085734 | 0 | -0.071497095 |
| cov1_2_3_5_6_7_9   | 39.1481 | -451.169 | 0.3158456 | 0 | -0.23063595 | 0 | -0.0608874   |
| cov1_2_3_5_6_8_9   | 39.1516 | -451.17  | 0.3159027 | 0 | -0.23163579 | 0 | -0.060932405 |
| cov1_2_5_6_7_8_9   | 39.1649 | -451.177 | 0.3168741 | 0 | -0.24053865 | 0 | -0.061743722 |
| cov1_2_5_6_7_9_10  | 39.1651 | -451.177 | 0.3168914 | 0 | -0.24096935 | 0 | -0.061878359 |
| cov1_2_5_6_8_9_10  | 39.1668 | -451.178 | 0.3168879 | 0 | -0.24122386 | 0 | -0.06187376  |
| cov1_2_3_4_6_7_9   | 39.1729 | -451.181 | 0.3152891 | 0 | -0.19243674 | 0 | -0.078338047 |
| cov1_2_3_4_6_8_9   | 39.1793 | -451.184 | 0.3153328 | 0 | -0.19314755 | 0 | -0.078462303 |
| cov1_3_5_6_7_10_11 | 39.1882 | -451.189 | 0.3161572 | 0 | -0.31214129 | 0 | 0            |
| cov1_3_5_6_8_10_11 | 39.1898 | -451.189 | 0.3161993 | 0 | -0.31289383 | 0 | 0            |
| cov1_3_4_6_7_9_11  | 39.1976 | -451.193 | 0.3125608 | 0 | -0.25975301 | 0 | 0            |
| cov1_2_3_4_5_6_9   | 39.2026 | -451.196 | 0.3174685 | 0 | -0.24183342 | 0 | -0.068986765 |
| cov1_3_4_6_8_9_11  | 39.2026 | -451.196 | 0.3125985 | 0 | -0.26053052 | 0 | 0            |
| cov1_2_3_5_6_9_10  | 39.2127 | -451.201 | 0.3171355 | 0 | -0.24801866 | 0 | -0.062059211 |
| cov1_3_6_7_8_9_11  | 39.2142 | -451.202 | 0.3131983 | 0 | -0.266462   | 0 | 0            |
| cov1_3_6_7_9_10_11 | 39.2151 | -451.202 | 0.3132066 | 0 | -0.26677698 | 0 | 0            |
| cov1_5_6_7_8_10_11 | 39.2179 | -451.203 | 0.3174777 | 0 | -0.32591309 | 0 | 0            |
| cov1_3_6_8_9_10_11 | 39.2198 | -451.204 | 0.3132376 | 0 | -0.26746426 | 0 | 0            |
| cov1_2_4_5_6_9_10  | 39.2209 | -451.205 | 0.3165387 | 0 | -0.23887913 | 0 | -0.06619286  |
| cov1_2_4_6_7_8_9   | 39.2346 | -451.212 | 0.3169464 | 0 | -0.1959354  | 0 | -0.085473912 |
| cov1_2_4_5_6_7_10  | 39.2348 | -451.212 | 0.3174703 | 0 | -0.23328719 | 0 | -0.070836435 |
| cov1_2_4_6_7_9_10  | 39.2356 | -451.212 | 0.3169516 | 0 | -0.19632921 | 0 | -0.085384286 |
| cov1_2_4_5_6_8_10  | 39.2369 | -451.213 | 0.3174626 | 0 | -0.23369737 | 0 | -0.070719715 |
| cov1_2_4_6_8_9_10  | 39.2385 | -451.214 | 0.3169423 | 0 | -0.19667319 | 0 | -0.085309718 |
| cov1_2_3_5_6_7_10  | 39.2415 | -451.215 | 0.3161875 | 0 | -0.2346648  | 0 | -0.060117217 |

|                    |         |          |           |   |             |   |              |
|--------------------|---------|----------|-----------|---|-------------|---|--------------|
| cov1_2_3_5_6_8_10  | 39.2447 | -451.217 | 0.3162423 | 0 | -0.23562623 | 0 | -0.060159924 |
| cov1_2_5_6_7_8_10  | 39.2551 | -451.222 | 0.3171283 | 0 | -0.24355442 | 0 | -0.060872818 |
| cov1_2_3_5_6_7_11  | 39.2704 | -451.23  | 0.3211016 | 0 | -0.313938   | 0 | -0.070676519 |
| cov1_2_3_4_6_7_10  | 39.2705 | -451.23  | 0.3156037 | 0 | -0.19496224 | 0 | -0.078007522 |
| cov1_2_3_5_6_8_11  | 39.2716 | -451.23  | 0.3211404 | 0 | -0.31459138 | 0 | -0.070712493 |
| cov1_2_3_4_6_8_10  | 39.2767 | -451.233 | 0.3156465 | 0 | -0.1956659  | 0 | -0.078124556 |
| cov1_2_3_4_5_6_11  | 39.2798 | -451.234 | 0.3221333 | 0 | -0.31925027 | 0 | -0.077315751 |
| cov1_2_4_5_6_7_11  | 39.2801 | -451.235 | 0.3225761 | 0 | -0.31803335 | 0 | -0.079149751 |
| cov1_2_4_5_6_8_11  | 39.2803 | -451.235 | 0.3225718 | 0 | -0.31818959 | 0 | -0.079101565 |
| cov1_2_3_4_5_6_10  | 39.2901 | -451.24  | 0.3177566 | 0 | -0.24477742 | 0 | -0.06837416  |
| cov1_2_5_6_7_8_11  | 39.2914 | -451.24  | 0.3222673 | 0 | -0.32522262 | 0 | -0.07165577  |
| cov1_2_3_6_7_8_9   | 39.296  | -451.242 | 0.3127937 | 0 | -0.18515461 | 0 | -0.057780381 |
| cov1_2_3_6_7_9_10  | 39.2968 | -451.243 | 0.3127988 | 0 | -0.18542354 | 0 | -0.057820222 |
| cov1_3_4_6_7_10_11 | 39.3011 | -451.245 | 0.3128879 | 0 | -0.26190256 | 0 | 0            |
| cov1_2_3_6_8_9_10  | 39.3046 | -451.247 | 0.312842  | 0 | -0.1862611  | 0 | -0.057847565 |
| cov1_3_4_6_8_10_11 | 39.306  | -451.247 | 0.3129249 | 0 | -0.26266665 | 0 | 0            |
| cov1_3_6_7_8_10_11 | 39.3136 | -451.251 | 0.3134392 | 0 | -0.26769184 | 0 | 0            |
| cov1_2_4_6_7_8_10  | 39.3266 | -451.258 | 0.3171815 | 0 | -0.19835945 | 0 | -0.084679924 |
| cov1_3_4_6_9_10_11 | 39.3439 | -451.266 | 0.3135653 | 0 | -0.27083025 | 0 | 0            |
| cov1_2_3_4_6_9_10  | 39.351  | -451.27  | 0.3165015 | 0 | -0.19885081 | 0 | -0.083971442 |
| cov1_2_3_6_7_8_10  | 39.4018 | -451.295 | 0.3130367 | 0 | -0.18761787 | 0 | -0.056709716 |
| cov1_4_6_7_9_10_11 | 39.4513 | -451.32  | 0.3153202 | 0 | -0.27351694 | 0 | 0            |
| cov1_4_6_8_9_10_11 | 39.4515 | -451.32  | 0.3153171 | 0 | -0.27358069 | 0 | 0            |
| cov1_4_6_7_8_9_11  | 39.4539 | -451.321 | 0.3153184 | 0 | -0.27327229 | 0 | 0            |
| cov1_6_7_8_9_10_11 | 39.4543 | -451.322 | 0.3151344 | 0 | -0.27048724 | 0 | 0            |
| cov1_2_6_7_8_9_10  | 39.5071 | -451.348 | 0.3146048 | 0 | -0.18881111 | 0 | -0.058496424 |
| cov1_4_6_7_8_10_11 | 39.5406 | -451.365 | 0.3155501 | 0 | -0.27491634 | 0 | 0            |
| cov1_3_4_5_6_7_9   | 39.5622 | -451.376 | 0.3140896 | 0 | -0.27716484 | 0 | 0            |
| cov1_3_4_5_6_8_9   | 39.5652 | -451.377 | 0.3141403 | 0 | -0.27815515 | 0 | 0            |
| cov1_2_3_4_6_7_11  | 39.5721 | -451.381 | 0.3196658 | 0 | -0.23706516 | 0 | -0.10002807  |
| cov1_2_3_4_6_8_11  | 39.5793 | -451.384 | 0.319725  | 0 | -0.23799704 | 0 | -0.10020682  |
| cov1_4_5_6_7_8_9   | 39.5944 | -451.392 | 0.3154575 | 0 | -0.29168307 | 0 | 0            |
| cov1_4_5_6_7_9_10  | 39.5951 | -451.392 | 0.3154638 | 0 | -0.29199112 | 0 | 0            |
| cov1_4_5_6_8_9_10  | 39.596  | -451.392 | 0.3154601 | 0 | -0.29217099 | 0 | 0            |
| cov1_3_4_5_6_9_10  | 39.6188 | -451.404 | 0.3152318 | 0 | -0.2944759  | 0 | 0            |
| cov1_3_4_5_6_7_10  | 39.6468 | -451.418 | 0.3144292 | 0 | -0.28028918 | 0 | 0            |
| cov1_3_4_5_6_8_10  | 39.6496 | -451.419 | 0.3144779 | 0 | -0.2812408  | 0 | 0            |
| cov1_4_5_6_7_8_10  | 39.6742 | -451.432 | 0.3156853 | 0 | -0.29355561 | 0 | 0            |
| cov1_3_5_6_7_8_9   | 39.697  | -451.443 | 0.3143355 | 0 | -0.26960989 | 0 | 0            |
| cov1_3_5_6_7_9_10  | 39.698  | -451.444 | 0.3143463 | 0 | -0.2699416  | 0 | 0            |
| cov1_3_5_6_8_9_10  | 39.7023 | -451.446 | 0.3144081 | 0 | -0.27108921 | 0 | 0            |
| cov1_5_6_7_8_9_10  | 39.7333 | -451.461 | 0.3157789 | 0 | -0.28500185 | 0 | 0            |
| cov1_3_5_6_7_8_10  | 39.7756 | -451.482 | 0.314662  | 0 | -0.27270696 | 0 | 0            |
| cov1_3_4_6_7_8_9   | 39.7811 | -451.485 | 0.3113076 | 0 | -0.22424196 | 0 | 0            |
| cov1_3_4_6_7_9_10  | 39.7815 | -451.485 | 0.3113312 | 0 | -0.22468041 | 0 | 0            |
| cov1_3_4_5_6_7_11  | 39.7847 | -451.487 | 0.3189249 | 0 | -0.36676884 | 0 | 0            |
| cov1_3_4_5_6_8_11  | 39.7856 | -451.487 | 0.3189562 | 0 | -0.36737863 | 0 | 0            |

|                    |         |          |           |   |             |   |              |
|--------------------|---------|----------|-----------|---|-------------|---|--------------|
| cov1_3_4_6_8_9_10  | 39.7898 | -451.489 | 0.3113748 | 0 | -0.2256051  | 0 | 0            |
| cov1_3_6_7_8_9_10  | 39.7958 | -451.492 | 0.311938  | 0 | -0.23097463 | 0 | 0            |
| cov1_2_4_6_7_8_11  | 39.7973 | -451.493 | 0.3233082 | 0 | -0.24523585 | 0 | -0.11532129  |
| cov1_4_5_6_7_8_11  | 39.8253 | -451.507 | 0.3204894 | 0 | -0.38345269 | 0 | 0            |
| cov1_3_4_6_7_8_10  | 39.8719 | -451.53  | 0.3116386 | 0 | -0.22674298 | 0 | 0            |
| cov1_2_3_6_7_8_11  | 39.9497 | -451.569 | 0.3154952 | 0 | -0.22442841 | 0 | -0.064916468 |
| cov1_3_5_6_7_8_11  | 40.0071 | -451.598 | 0.3193937 | 0 | -0.35849985 | 0 | 0            |
| cov1_4_6_7_8_9_10  | 40.0149 | -451.602 | 0.3139555 | 0 | -0.23818883 | 0 | 0            |
| cov1_2_3_4_5_6_7   | 40.041  | -451.615 | 0.3196343 | 0 | -0.26943687 | 0 | -0.070945861 |
| cov1_2_3_4_5_6_8   | 40.0453 | -451.617 | 0.3196895 | 0 | -0.27070855 | 0 | -0.070856772 |
| cov1_2_3_5_6_7_8   | 40.0473 | -451.618 | 0.3193769 | 0 | -0.27475593 | 0 | -0.06517295  |
| cov1_2_4_5_6_7_8   | 40.0641 | -451.627 | 0.3208548 | 0 | -0.28085383 | 0 | -0.072297481 |
| cov4_5_6_7_8_11    | 40.2349 | -455.209 | 0.3202816 | 0 | 0           | 0 | 0            |
| cov1_2_3_4_6_7_8   | 40.3516 | -451.77  | 0.3178839 | 0 | -0.19924192 | 0 | -0.09307646  |
| cov1_3_4_5_6_7_8   | 40.4786 | -451.834 | 0.3174954 | 0 | -0.32596267 | 0 | 0            |
| cov2_3_4_5_6_7_9   | 40.5576 | -451.873 | 0.3122759 | 0 | 0           | 0 | -0.12975098  |
| cov1_3_4_6_7_8_11  | 40.5744 | -451.882 | 0.3147175 | 0 | -0.27584468 | 0 | 0            |
| cov2_3_4_5_6_8_9   | 40.5927 | -451.891 | 0.3123827 | 0 | 0           | 0 | -0.13046919  |
| cov2_3_4_5_6_7_10  | 40.7075 | -451.948 | 0.3126612 | 0 | 0           | 0 | -0.13015789  |
| cov2_3_4_5_6_8_10  | 40.7427 | -451.966 | 0.3127677 | 0 | 0           | 0 | -0.13087071  |
| cov2_3_5_6_7_9_11  | 40.7645 | -451.977 | 0.3100555 | 0 | 0           | 0 | -0.10100133  |
| cov2_4_5_6_7_9_11  | 40.7828 | -451.986 | 0.3181791 | 0 | 0           | 0 | -0.16091979  |
| cov2_4_5_6_8_9_11  | 40.7932 | -451.991 | 0.3181544 | 0 | 0           | 0 | -0.16094804  |
| cov2_3_5_6_8_9_11  | 40.801  | -451.995 | 0.3101649 | 0 | 0           | 0 | -0.1016518   |
| cov2_3_4_5_6_9_11  | 40.9136 | -452.051 | 0.3160888 | 0 | 0           | 0 | -0.15460778  |
| cov2_4_5_6_7_10_11 | 40.9349 | -452.062 | 0.3184852 | 0 | 0           | 0 | -0.16057509  |
| cov2_4_5_6_8_10_11 | 40.9455 | -452.067 | 0.3184588 | 0 | 0           | 0 | -0.1606002   |
| cov2_3_5_6_7_10_11 | 40.9481 | -452.069 | 0.3104016 | 0 | 0           | 0 | -0.10052749  |
| cov2_4_5_6_9_10_11 | 40.9495 | -452.069 | 0.3173292 | 0 | 0           | 0 | -0.15895908  |
| cov2_3_5_6_7_8_9   | 40.9543 | -452.072 | 0.3096866 | 0 | 0           | 0 | -0.09499212  |
| cov2_3_5_6_7_9_10  | 40.9667 | -452.078 | 0.3096835 | 0 | 0           | 0 | -0.095334718 |
| cov2_3_5_6_8_10_11 | 40.9848 | -452.087 | 0.3105078 | 0 | 0           | 0 | -0.10117919  |
| cov2_4_5_6_7_8_9   | 40.9854 | -452.087 | 0.3171819 | 0 | 0           | 0 | -0.15020099  |
| cov2_4_5_6_7_9_10  | 40.9989 | -452.094 | 0.3171941 | 0 | 0           | 0 | -0.15038989  |
| cov2_3_5_6_8_9_10  | 41.0042 | -452.097 | 0.3097893 | 0 | 0           | 0 | -0.095970143 |
| cov2_4_5_6_8_9_10  | 41.0118 | -452.1   | 0.3171646 | 0 | 0           | 0 | -0.15037977  |
| cov2_3_4_5_6_10_11 | 41.0759 | -452.132 | 0.3164557 | 0 | 0           | 0 | -0.15454475  |
| cov2_3_5_6_7_8_10  | 41.1221 | -452.156 | 0.3100267 | 0 | 0           | 0 | -0.094690093 |
| cov2_4_5_6_7_8_10  | 41.1229 | -452.156 | 0.3174923 | 0 | 0           | 0 | -0.15011812  |
| cov2_3_4_5_6_9_10  | 41.2727 | -452.231 | 0.3154382 | 0 | 0           | 0 | -0.14369021  |
| cov2_3_6_7_8_9_11  | 41.3866 | -452.288 | 0.3154108 | 0 | 0           | 0 | -0.12613098  |
| cov2_3_4_6_7_9_11  | 41.4011 | -452.295 | 0.31628   | 0 | 0           | 0 | -0.13409889  |
| cov2_3_6_7_9_10_11 | 41.4017 | -452.295 | 0.3153994 | 0 | 0           | 0 | -0.1269868   |
| cov2_3_4_6_8_9_11  | 41.4287 | -452.309 | 0.316389  | 0 | 0           | 0 | -0.13482683  |
| cov2_3_6_8_9_10_11 | 41.431  | -452.31  | 0.3154781 | 0 | 0           | 0 | -0.12741925  |
| cov2_3_5_6_9_10_11 | 41.4338 | -452.311 | 0.3133022 | 0 | 0           | 0 | -0.11463788  |
| cov2_3_4_6_7_8_9   | 41.4658 | -452.327 | 0.3156123 | 0 | 0           | 0 | -0.12810577  |

|                    |         |          |           |   |              |   |              |
|--------------------|---------|----------|-----------|---|--------------|---|--------------|
| cov2_3_6_7_8_9_10  | 41.4719 | -452.33  | 0.3146799 | 0 | 0            | 0 | -0.12036403  |
| cov2_3_4_6_7_9_10  | 41.4823 | -452.336 | 0.3156021 | 0 | 0            | 0 | -0.12881214  |
| cov2_5_6_7_8_9_11  | 41.5029 | -452.346 | 0.3159018 | 0 | 0            | 0 | -0.11672261  |
| cov2_3_4_6_8_9_10  | 41.5121 | -452.351 | 0.3157034 | 0 | 0            | 0 | -0.12949661  |
| cov2_5_6_7_9_10_11 | 41.5218 | -452.355 | 0.3159118 | 0 | 0            | 0 | -0.11691253  |
| cov2_5_6_8_9_10_11 | 41.5285 | -452.359 | 0.3158918 | 0 | 0            | 0 | -0.11702173  |
| cov1_2_4_5_7_9_11  | 41.5393 | -452.364 | 0.319974  | 0 | -0.11983011  | 0 | -0.078170716 |
| cov1_2_4_5_9_10_11 | 41.5398 | -452.364 | 0.3198486 | 0 | -0.12406424  | 0 | -0.076986011 |
| cov1_2_4_5_8_9_11  | 41.5425 | -452.366 | 0.3199379 | 0 | -0.12061827  | 0 | -0.077831259 |
| cov1_2_3_4_5_9_11  | 41.5469 | -452.368 | 0.3197088 | 0 | -0.12294885  | 0 | -0.076372518 |
| cov1_2_5_7_8_9_11  | 41.5508 | -452.37  | 0.3194392 | 0 | -0.13592185  | 0 | -0.061521168 |
| cov2_3_6_7_8_10_11 | 41.5596 | -452.374 | 0.3157104 | 0 | 0            | 0 | -0.12570493  |
| cov2_4_6_7_8_9_11  | 41.5702 | -452.38  | 0.319221  | 0 | 0            | 0 | -0.14801452  |
| cov2_3_4_6_7_10_11 | 41.5707 | -452.38  | 0.3166889 | 0 | 0            | 0 | -0.13459804  |
| cov1_2_3_5_7_9_11  | 41.5782 | -452.384 | 0.318362  | 0 | -0.12542999  | 0 | -0.060545006 |
| cov1_2_3_4_7_9_11  | 41.5792 | -452.384 | 0.3177656 | 0 | -0.077001292 | 0 | -0.085935402 |
| cov1_2_3_5_8_9_11  | 41.5856 | -452.387 | 0.3185496 | 0 | -0.12793404  | 0 | -0.060721778 |
| cov1_2_3_5_9_10_11 | 41.5861 | -452.388 | 0.3190893 | 0 | -0.1356144   | 0 | -0.061709529 |
| cov1_2_5_7_9_10_11 | 41.5899 | -452.389 | 0.3195349 | 0 | -0.13698703  | 0 | -0.061952365 |
| cov1_2_5_8_9_10_11 | 41.5906 | -452.39  | 0.3195063 | 0 | -0.13740923  | 0 | -0.061958427 |
| cov2_4_6_7_9_10_11 | 41.594  | -452.392 | 0.3192725 | 0 | 0            | 0 | -0.14889852  |
| cov1_2_3_4_8_9_11  | 41.5974 | -452.393 | 0.3178821 | 0 | -0.077716803 | 0 | -0.086425716 |
| cov2_3_4_6_8_10_11 | 41.5988 | -452.394 | 0.3167889 | 0 | 0            | 0 | -0.13535116  |
| cov1_2_4_5_7_10_11 | 41.603  | -452.396 | 0.3202133 | 0 | -0.12341868  | 0 | -0.077682156 |
| cov1_2_4_7_8_9_11  | 41.604  | -452.397 | 0.3195404 | 0 | -0.080543112 | 0 | -0.09380791  |
| cov2_4_6_8_9_10_11 | 41.6049 | -452.397 | 0.3192423 | 0 | 0            | 0 | -0.14889297  |
| cov1_2_4_5_8_10_11 | 41.6062 | -452.398 | 0.3201769 | 0 | -0.124236    | 0 | -0.077322784 |
| cov1_2_3_4_5_10_11 | 41.6109 | -452.4   | 0.3199828 | 0 | -0.12673135  | 0 | -0.075951494 |
| cov1_2_5_7_8_10_11 | 41.6146 | -452.402 | 0.3196807 | 0 | -0.1395558   | 0 | -0.061088115 |
| cov2_5_6_7_8_9_10  | 41.6257 | -452.407 | 0.3152663 | 0 | 0            | 0 | -0.11124521  |
| cov2_3_4_6_7_8_10  | 41.627  | -452.408 | 0.3160286 | 0 | 0            | 0 | -0.12880674  |
| cov1_2_3_5_7_10_11 | 41.6435 | -452.416 | 0.3186698 | 0 | -0.12975245  | 0 | -0.060184527 |
| cov1_2_3_5_8_10_11 | 41.6505 | -452.42  | 0.3188538 | 0 | -0.13220923  | 0 | -0.06035616  |
| cov1_2_4_7_9_10_11 | 41.6507 | -452.42  | 0.319604  | 0 | -0.08071743  | 0 | -0.094102139 |
| cov2_4_6_7_8_9_10  | 41.6511 | -452.42  | 0.3185374 | 0 | 0            | 0 | -0.14265253  |
| cov1_2_3_4_7_10_11 | 41.6518 | -452.42  | 0.3180245 | 0 | -0.07949153  | 0 | -0.08592598  |
| cov1_2_4_8_9_10_11 | 41.6571 | -452.423 | 0.3195628 | 0 | -0.081031394 | 0 | -0.093948187 |
| cov1_2_3_4_8_10_11 | 41.6699 | -452.429 | 0.3181404 | 0 | -0.080205553 | 0 | -0.086397702 |
| cov1_2_3_4_9_10_11 | 41.6725 | -452.431 | 0.3187741 | 0 | -0.083099116 | 0 | -0.090963911 |
| cov2_5_6_7_8_10_11 | 41.6733 | -452.431 | 0.3161854 | 0 | 0            | 0 | -0.11580994  |
| cov1_2_4_7_8_10_11 | 41.6748 | -452.432 | 0.319765  | 0 | -0.082965228 | 0 | -0.093502938 |
| cov2_6_7_8_9_10_11 | 41.6942 | -452.442 | 0.3176315 | 0 | 0            | 0 | -0.12837302  |
| cov2_3_4_6_9_10_11 | 41.7007 | -452.445 | 0.3181152 | 0 | 0            | 0 | -0.14575203  |
| cov2_4_6_7_8_10_11 | 41.7354 | -452.462 | 0.3195852 | 0 | 0            | 0 | -0.14814987  |
| cov1_2_3_7_8_9_11  | 41.7849 | -452.487 | 0.3142914 | 0 | -0.063004579 | 0 | -0.056280326 |
| cov1_2_3_7_9_10_11 | 41.8295 | -452.509 | 0.3143183 | 0 | -0.063043042 | 0 | -0.056516517 |
| cov1_2_3_8_9_10_11 | 41.8561 | -452.523 | 0.3143934 | 0 | -0.063611357 | 0 | -0.056534341 |

|                    |         |          |           |   |              |   |              |
|--------------------|---------|----------|-----------|---|--------------|---|--------------|
| cov1_2_3_7_8_10_11 | 41.8692 | -452.529 | 0.3144915 | 0 | -0.065417179 | 0 | -0.055526666 |
| cov1_2_4_5_7_8_11  | 41.9105 | -452.55  | 0.3225201 | 0 | -0.16424381  | 0 | -0.079067392 |
| cov1_2_3_5_7_8_11  | 41.9266 | -452.558 | 0.320774  | 0 | -0.16478693  | 0 | -0.064028299 |
| cov1_2_3_4_5_7_11  | 41.93   | -452.559 | 0.3213277 | 0 | -0.15292154  | 0 | -0.077590694 |
| cov2_3_4_5_7_9_11  | 41.9362 | -452.563 | 0.3161405 | 0 | 0            | 0 | -0.11039298  |
| cov1_2_3_4_5_8_11  | 41.9401 | -452.565 | 0.3214996 | 0 | -0.1557028   | 0 | -0.077441322 |
| cov2_3_4_5_8_9_11  | 41.971  | -452.58  | 0.3162847 | 0 | 0            | 0 | -0.11128797  |
| cov1_4_5_7_8_9_11  | 42.0252 | -452.607 | 0.3179525 | 0 | -0.18402627  | 0 | 0            |
| cov1_3_4_5_7_9_11  | 42.0344 | -452.612 | 0.3165187 | 0 | -0.16874814  | 0 | 0            |
| cov2_3_4_5_7_10_11 | 42.0377 | -452.613 | 0.3163974 | 0 | 0            | 0 | -0.11125543  |
| cov1_3_4_5_8_9_11  | 42.042  | -452.615 | 0.3166979 | 0 | -0.17142043  | 0 | 0            |
| cov1_3_4_5_9_10_11 | 42.0474 | -452.618 | 0.3172181 | 0 | -0.17994863  | 0 | 0            |
| cov1_4_5_8_9_10_11 | 42.066  | -452.627 | 0.3179986 | 0 | -0.18556536  | 0 | 0            |
| cov1_4_5_7_9_10_11 | 42.0674 | -452.628 | 0.3180237 | 0 | -0.18509113  | 0 | 0            |
| cov1_3_5_7_8_9_11  | 42.0703 | -452.63  | 0.3164741 | 0 | -0.16362178  | 0 | 0            |
| cov2_3_4_5_8_10_11 | 42.0728 | -452.631 | 0.3165424 | 0 | 0            | 0 | -0.11213797  |
| cov2_3_4_5_6_7_11  | 42.0801 | -452.635 | 0.317259  | 0 | 0            | 0 | -0.15941223  |
| cov1_4_5_7_8_10_11 | 42.0822 | -452.636 | 0.3181711 | 0 | -0.1867589   | 0 | 0            |
| cov2_3_4_7_8_9_11  | 42.0918 | -452.64  | 0.3171343 | 0 | 0            | 0 | -0.11377205  |
| cov1_3_4_5_7_10_11 | 42.0941 | -452.642 | 0.3168122 | 0 | -0.17236514  | 0 | 0            |
| cov2_4_5_7_8_9_11  | 42.0947 | -452.642 | 0.3192981 | 0 | 0            | 0 | -0.126353    |
| cov1_3_4_5_8_10_11 | 42.1013 | -452.645 | 0.3169878 | 0 | -0.17499026  | 0 | 0            |
| cov1_2_7_8_9_10_11 | 42.1059 | -452.647 | 0.3166388 | 0 | -0.064113895 | 0 | -0.057240901 |
| cov1_5_7_8_9_10_11 | 42.109  | -452.649 | 0.3180463 | 0 | -0.18039967  | 0 | 0            |
| cov1_3_5_7_9_10_11 | 42.1145 | -452.652 | 0.3165356 | 0 | -0.16443288  | 0 | 0            |
| cov1_2_3_4_7_8_11  | 42.1198 | -452.654 | 0.3196434 | 0 | -0.094410436 | 0 | -0.09685885  |
| cov1_3_5_8_9_10_11 | 42.1251 | -452.657 | 0.3167193 | 0 | -0.16710227  | 0 | 0            |
| cov1_3_5_7_8_10_11 | 42.1285 | -452.659 | 0.3167632 | 0 | -0.16708633  | 0 | 0            |
| cov2_3_4_5_6_8_11  | 42.1323 | -452.661 | 0.3174181 | 0 | 0            | 0 | -0.1604174   |
| cov2_3_4_7_9_10_11 | 42.1352 | -452.662 | 0.3171502 | 0 | 0            | 0 | -0.11423299  |
| cov2_4_5_7_9_10_11 | 42.1462 | -452.668 | 0.3193622 | 0 | 0            | 0 | -0.12661937  |
| cov2_4_5_8_9_10_11 | 42.1585 | -452.674 | 0.3193189 | 0 | 0            | 0 | -0.12658164  |
| cov2_3_5_7_8_9_11  | 42.1601 | -452.675 | 0.3138818 | 0 | 0            | 0 | -0.08236637  |
| cov2_3_4_8_9_10_11 | 42.1652 | -452.677 | 0.3172795 | 0 | 0            | 0 | -0.11505638  |
| cov2_3_7_8_9_10_11 | 42.1845 | -452.687 | 0.314903  | 0 | 0            | 0 | -0.091252964 |
| cov2_4_5_7_8_10_11 | 42.1965 | -452.693 | 0.3195531 | 0 | 0            | 0 | -0.12697531  |
| cov2_3_5_7_9_10_11 | 42.2061 | -452.698 | 0.3139263 | 0 | 0            | 0 | -0.082853929 |
| cov2_3_4_7_8_10_11 | 42.2071 | -452.698 | 0.3174393 | 0 | 0            | 0 | -0.11494195  |
| cov2_3_4_5_9_10_11 | 42.2207 | -452.705 | 0.3180236 | 0 | 0            | 0 | -0.12331713  |
| cov2_4_7_8_9_10_11 | 42.231  | -452.71  | 0.3196652 | 0 | 0            | 0 | -0.12714215  |
| cov2_3_5_8_9_10_11 | 42.2435 | -452.716 | 0.3140674 | 0 | 0            | 0 | -0.083633139 |
| cov1_3_7_8_9_10_11 | 42.2558 | -452.722 | 0.3131558 | 0 | -0.10793465  | 0 | 0            |
| cov1_3_4_7_8_9_11  | 42.2565 | -452.723 | 0.3132192 | 0 | -0.10859908  | 0 | 0            |
| cov2_3_5_7_8_10_11 | 42.2757 | -452.732 | 0.3140923 | 0 | 0            | 0 | -0.082601748 |
| cov1_3_4_7_9_10_11 | 42.3038 | -452.746 | 0.3132595 | 0 | -0.10881931  | 0 | 0            |
| cov2_3_4_5_6_7_8   | 42.3216 | -452.755 | 0.3165431 | 0 | 0            | 0 | -0.14911563  |
| cov1_3_4_7_8_10_11 | 42.3273 | -452.758 | 0.3134842 | 0 | -0.11105212  | 0 | 0            |

|                    |         |          |           |   |              |   |              |
|--------------------|---------|----------|-----------|---|--------------|---|--------------|
| cov1_3_4_8_9_10_11 | 42.3305 | -452.76  | 0.3133604 | 0 | -0.1097843   | 0 | 0            |
| cov3_4_5_6_7_9_11  | 42.3678 | -452.778 | 0.305008  | 0 | 0            | 0 | 0            |
| cov3_5_6_7_8_9_11  | 42.3737 | -452.781 | 0.3051946 | 0 | 0            | 0 | 0            |
| cov3_5_6_7_9_10_11 | 42.394  | -452.792 | 0.3051837 | 0 | 0            | 0 | 0            |
| cov3_4_5_6_7_8_9   | 42.408  | -452.798 | 0.3050176 | 0 | 0            | 0 | 0            |
| cov1_3_4_5_7_8_11  | 42.4095 | -452.799 | 0.3189043 | 0 | -0.21254596  | 0 | 0            |
| cov3_4_5_6_8_9_11  | 42.4269 | -452.808 | 0.3050956 | 0 | 0            | 0 | 0            |
| cov3_4_5_6_7_9_10  | 42.4271 | -452.808 | 0.3050069 | 0 | 0            | 0 | 0            |
| cov3_5_6_7_8_9_10  | 42.4338 | -452.811 | 0.3051982 | 0 | 0            | 0 | 0            |
| cov3_5_6_8_9_10_11 | 42.4542 | -452.822 | 0.3052754 | 0 | 0            | 0 | 0            |
| cov3_4_5_6_8_9_10  | 42.4857 | -452.837 | 0.305093  | 0 | 0            | 0 | 0            |
| cov1_2_4_5_7_8_9   | 42.4902 | -452.84  | 0.317981  | 0 | -0.067253077 | 0 | -0.07050267  |
| cov1_2_3_4_7_8_9   | 42.5178 | -452.853 | 0.3157766 | 0 | -0.026193928 | 0 | -0.077569177 |
| cov1_2_3_5_7_8_9   | 42.519  | -452.854 | 0.316332  | 0 | -0.071166625 | 0 | -0.053826203 |
| cov2_5_7_8_9_10_11 | 42.5211 | -452.855 | 0.317623  | 0 | 0            | 0 | -0.096265158 |
| cov1_2_3_4_5_7_9   | 42.5232 | -452.856 | 0.3168747 | 0 | -0.056709315 | 0 | -0.069111764 |
| cov3_4_5_6_7_10_11 | 42.5352 | -452.862 | 0.3053738 | 0 | 0            | 0 | 0            |
| cov3_5_6_7_8_10_11 | 42.5355 | -452.862 | 0.3055405 | 0 | 0            | 0 | 0            |
| cov1_2_5_7_8_9_10  | 42.5403 | -452.865 | 0.3175577 | 0 | -0.083091645 | 0 | -0.055061211 |
| cov1_4_7_8_9_10_11 | 42.5407 | -452.865 | 0.316103  | 0 | -0.12227906  | 0 | 0            |
| cov1_2_4_5_7_9_10  | 42.5424 | -452.866 | 0.3180399 | 0 | -0.067732392 | 0 | -0.070506836 |
| cov1_2_4_5_7_8_10  | 42.5449 | -452.867 | 0.3181855 | 0 | -0.070285174 | 0 | -0.07004055  |
| cov1_2_3_4_5_8_9   | 42.5474 | -452.868 | 0.3170721 | 0 | -0.059709693 | 0 | -0.068868108 |
| cov1_2_4_5_8_9_10  | 42.5586 | -452.874 | 0.3179875 | 0 | -0.068364571 | 0 | -0.070010525 |
| cov3_4_5_6_7_8_10  | 42.5665 | -452.878 | 0.3053739 | 0 | 0            | 0 | 0            |
| cov1_2_3_5_7_9_10  | 42.5695 | -452.879 | 0.3163916 | 0 | -0.071556757 | 0 | -0.054034358 |
| cov1_2_3_4_7_9_10  | 42.5719 | -452.88  | 0.3158132 | 0 | -0.026153776 | 0 | -0.077639244 |
| cov1_2_3_5_7_8_10  | 42.5763 | -452.883 | 0.3166129 | 0 | -0.075187608 | 0 | -0.053379378 |
| cov1_2_3_4_7_8_10  | 42.5797 | -452.884 | 0.3160246 | 0 | -0.028859354 | 0 | -0.077429997 |
| cov1_2_3_4_5_7_10  | 42.5798 | -452.884 | 0.3171591 | 0 | -0.060658307 | 0 | -0.068676349 |
| cov2_3_4_5_7_8_9   | 42.5892 | -452.889 | 0.3154949 | 0 | 0            | 0 | -0.089156942 |
| cov1_2_3_5_8_9_10  | 42.5913 | -452.89  | 0.316597  | 0 | -0.074103013 | 0 | -0.054173077 |
| cov3_4_5_6_8_10_11 | 42.5941 | -452.892 | 0.3054613 | 0 | 0            | 0 | 0            |
| cov1_2_4_7_8_9_10  | 42.5944 | -452.892 | 0.3175931 | 0 | -0.029987913 | 0 | -0.085509957 |
| cov2_3_4_7_8_9_10  | 42.6017 | -452.895 | 0.3158213 | 0 | 0            | 0 | -0.091701974 |
| cov1_2_3_4_5_8_10  | 42.6033 | -452.896 | 0.3173515 | 0 | -0.063600924 | 0 | -0.068418134 |
| cov1_2_3_4_8_9_10  | 42.6057 | -452.897 | 0.3159293 | 0 | -0.026596717 | 0 | -0.078092469 |
| cov1_2_3_4_5_9_10  | 42.6435 | -452.916 | 0.3185116 | 0 | -0.082537088 | 0 | -0.06723948  |
| cov2_3_4_5_7_9_10  | 42.6436 | -452.916 | 0.3155349 | 0 | 0            | 0 | -0.089285649 |
| cov2_3_5_6_7_8_11  | 42.6436 | -452.916 | 0.3141935 | 0 | 0            | 0 | -0.11691415  |
| cov2_3_4_5_7_8_10  | 42.6652 | -452.927 | 0.3157217 | 0 | 0            | 0 | -0.090182072 |
| cov2_3_4_5_8_9_10  | 42.6821 | -452.936 | 0.3156822 | 0 | 0            | 0 | -0.090156029 |
| cov2_4_5_7_8_9_10  | 42.7056 | -452.947 | 0.3179012 | 0 | 0            | 0 | -0.10251589  |
| cov2_3_4_6_7_8_11  | 42.7062 | -452.948 | 0.3192116 | 0 | 0            | 0 | -0.15207318  |
| cov1_2_3_7_8_9_10  | 42.7396 | -452.964 | 0.3126153 | 0 | -0.014085532 | 0 | -0.050049775 |
| cov2_3_5_7_8_9_10  | 42.7478 | -452.968 | 0.3138497 | 0 | 0            | 0 | -0.06936174  |
| cov2_3_4_5_7_8_11  | 42.8369 | -453.013 | 0.3185649 | 0 | 0            | 0 | -0.13313458  |

|                      |         |          |           |   |              |   |              |
|----------------------|---------|----------|-----------|---|--------------|---|--------------|
| cov1_3_4_5_7_8_9     | 42.8864 | -453.038 | 0.3148326 | 0 | -0.11215506  | 0 | 0            |
| cov2_4_5_6_7_8_11    | 42.9139 | -453.051 | 0.3247532 | 0 | 0            | 0 | -0.18860759  |
| cov1_4_5_7_8_9_10    | 42.9253 | -453.057 | 0.3163539 | 0 | -0.12841579  | 0 | 0            |
| cov1_2_3_4_5_7_8     | 42.9322 | -453.061 | 0.3193817 | 0 | -0.1009004   | 0 | -0.069697961 |
| cov1_3_4_5_7_9_10    | 42.9375 | -453.063 | 0.3148889 | 0 | -0.11262496  | 0 | 0            |
| cov1_3_4_5_7_8_10    | 42.9381 | -453.064 | 0.3151045 | 0 | -0.11546592  | 0 | 0            |
| cov1_3_5_7_8_9_10    | 42.9479 | -453.068 | 0.3148735 | 0 | -0.10879062  | 0 | 0            |
| cov1_3_4_5_8_9_10    | 42.9587 | -453.074 | 0.3150862 | 0 | -0.11530459  | 0 | 0            |
| cov1_3_4_7_8_9_10    | 43.1132 | -453.151 | 0.3119058 | 0 | -0.058535549 | 0 | 0            |
| cov3_4_5_7_8_9_11    | 43.2579 | -453.223 | 0.308892  | 0 | 0            | 0 | 0            |
| cov3_4_6_7_8_9_10    | 43.2831 | -453.236 | 0.3085867 | 0 | 0            | 0 | 0            |
| cov3_4_6_7_8_9_11    | 43.2838 | -453.236 | 0.3086556 | 0 | 0            | 0 | 0            |
| cov3_5_7_8_9_10_11   | 43.285  | -453.237 | 0.30902   | 0 | 0            | 0 | 0            |
| cov3_4_5_7_9_10_11   | 43.311  | -453.25  | 0.3089361 | 0 | 0            | 0 | 0            |
| cov3_4_6_7_9_10_11   | 43.3194 | -453.254 | 0.3086352 | 0 | 0            | 0 | 0            |
| cov3_4_5_8_9_10_11   | 43.3695 | -453.279 | 0.3090398 | 0 | 0            | 0 | 0            |
| cov3_4_6_8_9_10_11   | 43.3714 | -453.28  | 0.3087216 | 0 | 0            | 0 | 0            |
| cov3_4_5_7_8_10_11   | 43.3779 | -453.283 | 0.3091112 | 0 | 0            | 0 | 0            |
| cov3_4_6_7_8_10_11   | 43.4632 | -453.326 | 0.3090401 | 0 | 0            | 0 | 0            |
| cov3_4_5_6_9_10_11   | 43.5411 | -453.365 | 0.3083723 | 0 | 0            | 0 | 0            |
| cov3_4_5_7_8_9_10    | 43.5557 | -453.372 | 0.3095144 | 0 | 0            | 0 | 0            |
| cov3_4_7_8_9_10_11   | 43.5582 | -453.374 | 0.3099504 | 0 | 0            | 0 | 0            |
| cov4_5_6_7_8_9_10    | 43.7647 | -453.477 | 0.3120706 | 0 | 0            | 0 | 0            |
| cov5_6_7_8_9_10_11   | 43.775  | -453.482 | 0.3121959 | 0 | 0            | 0 | 0            |
| cov4_5_6_7_8_9_11    | 43.7791 | -453.484 | 0.3121761 | 0 | 0            | 0 | 0            |
| cov4_5_6_7_9_10_11   | 43.7927 | -453.491 | 0.3121335 | 0 | 0            | 0 | 0            |
| cov4_5_6_8_9_10_11   | 43.8034 | -453.496 | 0.3121033 | 0 | 0            | 0 | 0            |
| cov4_5_6_7_8_10_11   | 43.904  | -453.546 | 0.3124104 | 0 | 0            | 0 | 0            |
| cov4_5_7_8_9_10_11   | 44.1648 | -453.677 | 0.3136933 | 0 | 0            | 0 | 0            |
| cov4_6_7_8_9_10_11   | 44.1843 | -453.687 | 0.3134828 | 0 | 0            | 0 | 0            |
| cov3_6_7_8_9_10_11   | 44.3979 | -453.793 | 0.3131949 | 0 | 0            | 0 | 0            |
| cov3_4_5_6_7_8_11    | 44.813  | -454.001 | 0.3092334 | 0 | 0            | 0 | 0            |
| cov1_2_4_5_6_9_10_11 | 45.4347 | -450.814 | 0.3189896 | 0 | -0.26974693  | 0 | -0.077691232 |
| cov1_2_3_4_5_6_9_11  | 45.4362 | -450.815 | 0.3186719 | 0 | -0.26851618  | 0 | -0.076626672 |
| cov1_2_4_5_6_7_9_11  | 45.4367 | -450.815 | 0.3190329 | 0 | -0.26763026  | 0 | -0.078148745 |
| cov1_2_4_5_6_8_9_11  | 45.4369 | -450.816 | 0.3190375 | 0 | -0.26781201  | 0 | -0.078093382 |
| cov1_2_3_5_6_7_9_11  | 45.447  | -450.821 | 0.3176566 | 0 | -0.26947206  | 0 | -0.066281343 |
| cov1_2_3_5_6_8_9_11  | 45.448  | -450.821 | 0.3176933 | 0 | -0.27006271  | 0 | -0.066315159 |
| cov1_2_3_5_6_9_10_11 | 45.4521 | -450.823 | 0.3182032 | 0 | -0.27717079  | 0 | -0.067133554 |
| cov1_2_5_6_7_9_10_11 | 45.4586 | -450.826 | 0.3186702 | 0 | -0.27953434  | 0 | -0.067426535 |
| cov1_2_5_6_8_9_10_11 | 45.4586 | -450.826 | 0.3186668 | 0 | -0.27958656  | 0 | -0.067428118 |
| cov1_2_5_6_7_8_9_11  | 45.4618 | -450.828 | 0.3186351 | 0 | -0.27882119  | 0 | -0.067096141 |
| cov1_2_3_4_6_7_9_11  | 45.4733 | -450.834 | 0.3170815 | 0 | -0.22806385  | 0 | -0.08544322  |
| cov1_2_3_4_6_8_9_11  | 45.4763 | -450.835 | 0.3171169 | 0 | -0.22858706  | 0 | -0.085552314 |
| cov1_2_4_6_7_8_9_11  | 45.5338 | -450.864 | 0.3187526 | 0 | -0.23159345  | 0 | -0.092522699 |
| cov1_2_4_6_7_9_10_11 | 45.5341 | -450.864 | 0.3187616 | 0 | -0.23182528  | 0 | -0.092724765 |
| cov1_2_4_6_8_9_10_11 | 45.5347 | -450.864 | 0.3187619 | 0 | -0.23198943  | 0 | -0.092687932 |



|                      |         |          |           |   |             |   |              |
|----------------------|---------|----------|-----------|---|-------------|---|--------------|
| cov1_2_3_4_6_9_10_11 | 45.5364 | -450.865 | 0.3179258 | 0 | -0.23376782 | 0 | -0.089465865 |
| cov1_2_4_5_6_7_10_11 | 45.5373 | -450.866 | 0.3192992 | 0 | -0.2706553  | 0 | -0.077373922 |
| cov1_2_4_5_6_8_10_11 | 45.5376 | -450.866 | 0.3192946 | 0 | -0.27081495 | 0 | -0.077320316 |
| cov1_2_3_4_5_6_10_11 | 45.5377 | -450.866 | 0.3189881 | 0 | -0.27177532 | 0 | -0.07599116  |
| cov1_2_3_5_6_7_10_11 | 45.5506 | -450.872 | 0.3180144 | 0 | -0.27354673 | 0 | -0.065570389 |
| cov1_2_3_5_6_8_10_11 | 45.5515 | -450.873 | 0.3180492 | 0 | -0.27410392 | 0 | -0.065604581 |
| cov1_2_5_6_7_8_10_11 | 45.5627 | -450.878 | 0.3188951 | 0 | -0.28191799 | 0 | -0.066296582 |
| cov1_2_3_4_6_7_10_11 | 45.583  | -450.889 | 0.3173965 | 0 | -0.23025005 | 0 | -0.085206152 |
| cov1_2_3_4_6_8_10_11 | 45.586  | -450.89  | 0.3174316 | 0 | -0.23076465 | 0 | -0.085316128 |
| cov1_2_3_6_7_9_10_11 | 45.6203 | -450.907 | 0.3143054 | 0 | -0.21952747 | 0 | -0.062976687 |
| cov1_2_3_6_7_8_9_11  | 45.6213 | -450.908 | 0.3143179 | 0 | -0.219459   | 0 | -0.062801089 |
| cov1_2_3_6_8_9_10_11 | 45.6247 | -450.909 | 0.3143353 | 0 | -0.2201714  | 0 | -0.062993198 |
| cov1_2_4_6_7_8_10_11 | 45.6392 | -450.917 | 0.3190028 | 0 | -0.23368402 | 0 | -0.091887181 |
| cov1_2_3_6_7_8_10_11 | 45.741  | -450.968 | 0.3145513 | 0 | -0.22151704 | 0 | -0.061728236 |
| cov1_2_6_7_8_9_10_11 | 45.8478 | -451.021 | 0.316228  | 0 | -0.22266162 | 0 | -0.063623789 |
| cov1_3_4_5_6_7_9_11  | 45.938  | -451.066 | 0.315596  | 0 | -0.31747867 | 0 | 0            |
| cov1_3_4_5_6_8_9_11  | 45.9389 | -451.066 | 0.315628  | 0 | -0.31805986 | 0 | 0            |
| cov1_3_4_5_6_9_10_11 | 45.9443 | -451.069 | 0.3160656 | 0 | -0.32517775 | 0 | 0            |
| cov1_4_5_6_8_9_10_11 | 45.9681 | -451.081 | 0.3169637 | 0 | -0.3324193  | 0 | 0            |
| cov1_4_5_6_7_9_10_11 | 45.9684 | -451.081 | 0.3169706 | 0 | -0.33244364 | 0 | 0            |
| cov1_4_5_6_7_8_9_11  | 45.9691 | -451.082 | 0.3169531 | 0 | -0.33178259 | 0 | 0            |
| cov1_3_4_5_6_7_10_11 | 46.0323 | -451.113 | 0.3159473 | 0 | -0.32066036 | 0 | 0            |
| cov1_3_4_5_6_8_10_11 | 46.033  | -451.114 | 0.3159776 | 0 | -0.32120863 | 0 | 0            |
| cov1_4_5_6_7_8_10_11 | 46.059  | -451.127 | 0.3171984 | 0 | -0.33376244 | 0 | 0            |
| cov1_3_5_6_7_8_9_11  | 46.0937 | -451.144 | 0.3158092 | 0 | -0.30871587 | 0 | 0            |
| cov1_3_5_6_7_9_10_11 | 46.0941 | -451.144 | 0.3158171 | 0 | -0.30917599 | 0 | 0            |
| cov1_3_5_6_8_9_10_11 | 46.0958 | -451.145 | 0.3158544 | 0 | -0.30996657 | 0 | 0            |
| cov1_2_3_4_5_6_7_9   | 46.1234 | -451.159 | 0.3162174 | 0 | -0.2208547  | 0 | -0.070509775 |
| cov1_2_3_4_5_6_8_9   | 46.1273 | -451.161 | 0.3162737 | 0 | -0.22206594 | 0 | -0.070425647 |
| cov1_5_6_7_8_9_10_11 | 46.1291 | -451.162 | 0.3172582 | 0 | -0.32420639 | 0 | 0            |
| cov1_2_4_5_6_7_8_9   | 46.1389 | -451.167 | 0.3172255 | 0 | -0.2300986  | 0 | -0.071664303 |
| cov1_2_4_5_6_7_9_10  | 46.1394 | -451.167 | 0.3172367 | 0 | -0.23060185 | 0 | -0.07168837  |
| cov1_2_4_5_6_8_9_10  | 46.1415 | -451.168 | 0.317229  | 0 | -0.23101308 | 0 | -0.071571006 |
| cov1_2_3_5_6_7_9_10  | 46.1418 | -451.168 | 0.3158434 | 0 | -0.23065349 | 0 | -0.061043417 |
| cov1_2_3_5_6_7_8_9   | 46.142  | -451.168 | 0.315836  | 0 | -0.23030283 | 0 | -0.060881947 |
| cov1_2_3_5_6_8_9_10  | 46.1452 | -451.17  | 0.3159014 | 0 | -0.23166854 | 0 | -0.06108556  |
| cov1_2_5_6_7_8_9_10  | 46.159  | -451.177 | 0.316888  | 0 | -0.24066855 | 0 | -0.061866962 |
| cov1_2_3_4_6_7_8_9   | 46.1666 | -451.18  | 0.3152805 | 0 | -0.19206932 | 0 | -0.078353785 |
| cov1_2_3_4_6_7_9_10  | 46.1675 | -451.181 | 0.31529   | 0 | -0.19233316 | 0 | -0.078420486 |
| cov1_2_3_4_6_8_9_10  | 46.1739 | -451.184 | 0.3153241 | 0 | -0.19306627 | 0 | -0.078532025 |
| cov1_3_5_6_7_8_10_11 | 46.1822 | -451.188 | 0.3161477 | 0 | -0.31181369 | 0 | 0            |
| cov1_3_4_6_7_8_9_11  | 46.1916 | -451.193 | 0.3125528 | 0 | -0.2594515  | 0 | 0            |
| cov1_3_4_6_7_9_10_11 | 46.1924 | -451.193 | 0.3125587 | 0 | -0.25974198 | 0 | 0            |
| cov1_2_3_4_5_6_9_10  | 46.1972 | -451.196 | 0.3174715 | 0 | -0.24194554 | 0 | -0.069031634 |
| cov1_3_4_6_8_9_10_11 | 46.1975 | -451.196 | 0.3125961 | 0 | -0.26050884 | 0 | 0            |
| cov1_3_6_7_8_9_10_11 | 46.2091 | -451.202 | 0.3131999 | 0 | -0.2663889  | 0 | 0            |
| cov1_2_3_4_5_6_7_10  | 46.2163 | -451.205 | 0.3165655 | 0 | -0.22475069 | 0 | -0.069845957 |

|                      |         |          |           |   |             |   |              |
|----------------------|---------|----------|-----------|---|-------------|---|--------------|
| cov1_2_3_4_5_6_8_10  | 46.22   | -451.207 | 0.3166192 | 0 | -0.22591422 | 0 | -0.069765056 |
| cov1_2_4_5_6_7_8_10  | 46.2287 | -451.211 | 0.3174639 | 0 | -0.23294104 | 0 | -0.070861609 |
| cov1_2_4_6_7_8_9_10  | 46.2294 | -451.212 | 0.316944  | 0 | -0.19598131 | 0 | -0.085402813 |
| cov1_2_3_5_6_7_8_10  | 46.2354 | -451.215 | 0.3161781 | 0 | -0.23433695 | 0 | -0.060111878 |
| cov1_2_3_4_5_6_7_11  | 46.2544 | -451.224 | 0.3214185 | 0 | -0.307064   | 0 | -0.077888776 |
| cov1_2_3_4_5_6_8_11  | 46.2558 | -451.225 | 0.3214561 | 0 | -0.30784608 | 0 | -0.077850615 |
| cov1_2_3_4_6_7_8_10  | 46.2642 | -451.229 | 0.3155951 | 0 | -0.19460009 | 0 | -0.078021366 |
| cov1_2_3_5_6_7_8_11  | 46.2646 | -451.229 | 0.3210944 | 0 | -0.31367857 | 0 | -0.070672402 |
| cov1_2_4_5_6_7_8_11  | 46.2744 | -451.234 | 0.3225715 | 0 | -0.31777065 | 0 | -0.079168878 |
| cov1_2_3_6_7_8_9_10  | 46.2908 | -451.242 | 0.3127891 | 0 | -0.18510286 | 0 | -0.057820228 |
| cov1_3_4_6_7_8_10_11 | 46.2952 | -451.245 | 0.3128807 | 0 | -0.26160546 | 0 | 0            |
| cov1_4_6_7_8_9_10_11 | 46.4456 | -451.32  | 0.3153142 | 0 | -0.2732606  | 0 | 0            |
| cov1_3_4_5_6_7_8_9   | 46.5563 | -451.375 | 0.3140814 | 0 | -0.27685094 | 0 | 0            |
| cov1_3_4_5_6_7_9_10  | 46.5569 | -451.375 | 0.3140872 | 0 | -0.27722969 | 0 | 0            |
| cov1_3_4_5_6_8_9_10  | 46.5599 | -451.377 | 0.3141382 | 0 | -0.27821741 | 0 | 0            |
| cov1_2_3_4_6_7_8_11  | 46.5661 | -451.38  | 0.3196584 | 0 | -0.23675501 | 0 | -0.10004198  |
| cov1_4_5_6_7_8_9_10  | 46.5892 | -451.392 | 0.315457  | 0 | -0.29171256 | 0 | 0            |
| cov1_3_4_5_6_7_8_10  | 46.6409 | -451.418 | 0.3144213 | 0 | -0.27997942 | 0 | 0            |
| cov1_3_5_6_7_8_9_10  | 46.6918 | -451.443 | 0.3143386 | 0 | -0.2695919  | 0 | 0            |
| cov1_3_4_6_7_8_9_10  | 46.7754 | -451.485 | 0.3113229 | 0 | -0.22435807 | 0 | 0            |
| cov1_3_4_5_6_7_8_11  | 46.7791 | -451.487 | 0.3189194 | 0 | -0.36654164 | 0 | 0            |
| cov1_2_3_4_5_6_7_8   | 47.0351 | -451.615 | 0.3196253 | 0 | -0.26908172 | 0 | -0.070965509 |
| cov2_3_4_5_6_7_9_11  | 47.272  | -451.733 | 0.3129671 | 0 | 0           | 0 | -0.14001909  |
| cov2_3_4_5_6_8_9_11  | 47.3059 | -451.75  | 0.3130759 | 0 | 0           | 0 | -0.1407425   |
| cov2_3_4_5_6_7_10_11 | 47.4381 | -451.816 | 0.3133563 | 0 | 0           | 0 | -0.14020769  |
| cov2_3_4_5_6_8_10_11 | 47.4722 | -451.833 | 0.3134669 | 0 | 0           | 0 | -0.14092831  |
| cov2_3_4_5_6_7_8_9   | 47.5408 | -451.867 | 0.3122697 | 0 | 0           | 0 | -0.12949399  |
| cov2_3_4_5_6_7_9_10  | 47.5522 | -451.873 | 0.3122728 | 0 | 0           | 0 | -0.12978643  |
| cov2_3_4_5_6_8_9_10  | 47.5874 | -451.891 | 0.3123814 | 0 | 0           | 0 | -0.13051489  |
| cov2_3_4_5_6_7_8_10  | 47.6905 | -451.942 | 0.3126545 | 0 | 0           | 0 | -0.1298983   |
| cov2_3_5_6_7_8_9_11  | 47.7446 | -451.969 | 0.3100622 | 0 | 0           | 0 | -0.10080133  |
| cov2_3_5_6_7_9_10_11 | 47.7569 | -451.976 | 0.3100543 | 0 | 0           | 0 | -0.1012521   |
| cov2_4_5_6_7_8_9_11  | 47.7618 | -451.978 | 0.3181579 | 0 | 0           | 0 | -0.16058485  |
| cov2_4_5_6_7_9_10_11 | 47.7775 | -451.986 | 0.3181729 | 0 | 0           | 0 | -0.16082388  |
| cov2_4_5_6_8_9_10_11 | 47.7878 | -451.991 | 0.3181472 | 0 | 0           | 0 | -0.16085184  |
| cov2_3_5_6_8_9_10_11 | 47.7936 | -451.994 | 0.3101639 | 0 | 0           | 0 | -0.10189508  |
| cov2_3_4_5_6_9_10_11 | 47.9083 | -452.051 | 0.3160874 | 0 | 0           | 0 | -0.15455218  |
| cov2_4_5_6_7_8_10_11 | 47.9136 | -452.054 | 0.318463  | 0 | 0           | 0 | -0.16023774  |
| cov2_3_5_6_7_8_10_11 | 47.928  | -452.061 | 0.3104059 | 0 | 0           | 0 | -0.10034256  |
| cov2_3_5_6_7_8_9_10  | 47.9482 | -452.071 | 0.3096851 | 0 | 0           | 0 | -0.095132313 |
| cov2_4_5_6_7_8_9_10  | 47.9794 | -452.087 | 0.3171718 | 0 | 0           | 0 | -0.15003695  |
| cov2_3_4_6_7_8_9_11  | 48.3672 | -452.281 | 0.3162505 | 0 | 0           | 0 | -0.13378478  |
| cov2_3_6_7_8_9_10_11 | 48.3689 | -452.282 | 0.3153429 | 0 | 0           | 0 | -0.12642079  |
| cov2_3_4_6_7_9_10_11 | 48.3824 | -452.288 | 0.3162318 | 0 | 0           | 0 | -0.13461713  |
| cov2_3_4_6_8_9_10_11 | 48.4106 | -452.302 | 0.3163436 | 0 | 0           | 0 | -0.13534123  |
| cov2_3_4_6_7_8_9_10  | 48.451  | -452.323 | 0.3155636 | 0 | 0           | 0 | -0.12844189  |
| cov1_2_4_5_7_8_9_11  | 48.4858 | -452.34  | 0.3199244 | 0 | -0.11937352 | 0 | -0.078363141 |

|                      |         |          |           |   |              |   |              |
|----------------------|---------|----------|-----------|---|--------------|---|--------------|
| cov2_5_6_7_8_9_10_11 | 48.4976 | -452.346 | 0.3158966 | 0 | 0            | 0 | -0.11664916  |
| cov1_2_3_4_5_7_9_11  | 48.5161 | -452.355 | 0.3188942 | 0 | -0.10983963  | 0 | -0.077023825 |
| cov1_2_3_4_7_8_9_11  | 48.5243 | -452.359 | 0.317709  | 0 | -0.076689858 | 0 | -0.086026345 |
| cov1_2_3_5_7_8_9_11  | 48.5251 | -452.36  | 0.3182957 | 0 | -0.12499546  | 0 | -0.060579646 |
| cov1_2_3_4_5_8_9_11  | 48.5257 | -452.36  | 0.3190759 | 0 | -0.1127381   | 0 | -0.076868248 |
| cov1_2_4_5_7_9_10_11 | 48.5268 | -452.36  | 0.3200051 | 0 | -0.12062241  | 0 | -0.078505433 |
| cov1_2_4_5_8_9_10_11 | 48.53   | -452.362 | 0.3199707 | 0 | -0.12146281  | 0 | -0.0781324   |
| cov1_2_3_4_5_9_10_11 | 48.5342 | -452.364 | 0.3197207 | 0 | -0.12372892  | 0 | -0.076621449 |
| cov2_3_4_6_7_8_10_11 | 48.5365 | -452.365 | 0.3166492 | 0 | 0            | 0 | -0.13430983  |
| cov1_2_5_7_8_9_10_11 | 48.5373 | -452.366 | 0.319479  | 0 | -0.13666768  | 0 | -0.061996798 |
| cov1_2_4_5_7_8_10_11 | 48.55   | -452.372 | 0.3201646 | 0 | -0.12300057  | 0 | -0.077847223 |
| cov2_4_6_7_8_9_10_11 | 48.5598 | -452.377 | 0.3192387 | 0 | 0            | 0 | -0.14855757  |
| cov1_2_3_5_7_9_10_11 | 48.5631 | -452.379 | 0.3183607 | 0 | -0.12581631  | 0 | -0.061029459 |
| cov1_2_3_4_7_9_10_11 | 48.5682 | -452.381 | 0.3177352 | 0 | -0.076704916 | 0 | -0.086362783 |
| cov1_2_3_5_8_9_10_11 | 48.5708 | -452.382 | 0.3185488 | 0 | -0.12832074  | 0 | -0.061199074 |
| cov1_2_3_4_5_7_10_11 | 48.5818 | -452.388 | 0.3192027 | 0 | -0.11416504  | 0 | -0.076587269 |
| cov1_2_3_4_8_9_10_11 | 48.5868 | -452.39  | 0.3178536 | 0 | -0.077434469 | 0 | -0.086836603 |
| cov1_2_3_4_5_8_10_11 | 48.591  | -452.393 | 0.3193811 | 0 | -0.11701065  | 0 | -0.076433283 |
| cov1_2_3_5_7_8_10_11 | 48.591  | -452.393 | 0.3186052 | 0 | -0.12933399  | 0 | -0.060214038 |
| cov1_2_4_7_8_9_10_11 | 48.5965 | -452.395 | 0.3195538 | 0 | -0.080422932 | 0 | -0.094217718 |
| cov1_2_3_4_7_8_10_11 | 48.5975 | -452.396 | 0.3179693 | 0 | -0.079194256 | 0 | -0.08601155  |
| cov1_2_3_7_8_9_10_11 | 48.7755 | -452.485 | 0.3142573 | 0 | -0.062714026 | 0 | -0.056557748 |
| cov2_3_4_5_7_8_9_11  | 48.878  | -452.536 | 0.3160869 | 0 | 0            | 0 | -0.11038082  |
| cov1_2_3_4_5_7_8_11  | 48.8823 | -452.538 | 0.3212863 | 0 | -0.15272354  | 0 | -0.077740999 |
| cov2_3_4_5_7_9_10_11 | 48.9259 | -452.56  | 0.3161241 | 0 | 0            | 0 | -0.11073213  |
| cov2_3_4_5_8_9_10_11 | 48.961  | -452.578 | 0.3162706 | 0 | 0            | 0 | -0.11161977  |
| cov2_3_4_5_7_8_10_11 | 48.98   | -452.587 | 0.3163456 | 0 | 0            | 0 | -0.11124235  |
| cov1_3_4_5_7_8_9_11  | 48.9826 | -452.588 | 0.3164499 | 0 | -0.16832628  | 0 | 0            |
| cov1_4_5_7_8_9_10_11 | 49.0163 | -452.605 | 0.3179735 | 0 | -0.18480735  | 0 | 0            |
| cov1_3_4_5_7_9_10_11 | 49.0239 | -452.609 | 0.3165101 | 0 | -0.16933022  | 0 | 0            |
| cov1_3_4_5_8_9_10_11 | 49.0317 | -452.613 | 0.31669   | 0 | -0.17199507  | 0 | 0            |
| cov1_3_4_5_7_8_10_11 | 49.0428 | -452.618 | 0.3167491 | 0 | -0.17195355  | 0 | 0            |
| cov2_3_4_5_6_7_8_11  | 49.0578 | -452.626 | 0.3172452 | 0 | 0            | 0 | -0.15910354  |
| cov1_3_5_7_8_9_10_11 | 49.062  | -452.628 | 0.3164683 | 0 | -0.16401298  | 0 | 0            |
| cov2_3_4_7_8_9_10_11 | 49.0757 | -452.635 | 0.3170943 | 0 | 0            | 0 | -0.11421225  |
| cov2_4_5_7_8_9_10_11 | 49.0884 | -452.641 | 0.3193103 | 0 | 0            | 0 | -0.12661604  |
| cov2_3_5_7_8_9_10_11 | 49.1486 | -452.671 | 0.3138717 | 0 | 0            | 0 | -0.082809059 |
| cov1_3_4_7_8_9_10_11 | 49.2505 | -452.722 | 0.3132015 | 0 | -0.10854733  | 0 | 0            |
| cov3_4_5_6_7_8_9_11  | 49.3413 | -452.768 | 0.3050256 | 0 | 0            | 0 | 0            |
| cov3_4_5_6_7_9_10_11 | 49.362  | -452.778 | 0.3050137 | 0 | 0            | 0 | 0            |
| cov3_5_6_7_8_9_10_11 | 49.3674 | -452.781 | 0.3052002 | 0 | 0            | 0 | 0            |
| cov3_4_5_6_7_8_9_10  | 49.4018 | -452.798 | 0.3050241 | 0 | 0            | 0 | 0            |
| cov3_4_5_6_8_9_10_11 | 49.4209 | -452.808 | 0.3050988 | 0 | 0            | 0 | 0            |
| cov1_2_3_4_5_7_8_9   | 49.4634 | -452.829 | 0.3168169 | 0 | -0.056284231 | 0 | -0.069314448 |
| cov1_2_4_5_7_8_9_10  | 49.4832 | -452.839 | 0.3179938 | 0 | -0.067472413 | 0 | -0.070693249 |
| cov3_4_5_6_7_8_10_11 | 49.5084 | -452.851 | 0.3053917 | 0 | 0            | 0 | 0            |
| cov1_2_3_5_7_8_9_10  | 49.5105 | -452.852 | 0.3163266 | 0 | -0.07124527  | 0 | -0.054095646 |

|                        |         |          |           |   |              |   |              |
|------------------------|---------|----------|-----------|---|--------------|---|--------------|
| cov1_2_3_4_7_8_9_10    | 49.5113 | -452.853 | 0.3157608 | 0 | -0.025986596 | 0 | -0.077755417 |
| cov1_2_3_4_5_7_9_10    | 49.5153 | -452.855 | 0.316877  | 0 | -0.056881632 | 0 | -0.069276936 |
| cov1_2_3_4_5_7_8_10    | 49.5206 | -452.857 | 0.3171011 | 0 | -0.060251307 | 0 | -0.06886232  |
| cov1_2_3_4_5_8_9_10    | 49.5397 | -452.867 | 0.3170659 | 0 | -0.059889177 | 0 | -0.068997051 |
| cov2_3_4_5_7_8_9_10    | 49.582  | -452.888 | 0.315486  | 0 | 0            | 0 | -0.089330333 |
| cov1_3_4_5_7_8_9_10    | 49.88   | -453.037 | 0.3148274 | 0 | -0.1123542   | 0 | 0            |
| cov3_4_5_7_8_9_10_11   | 50.2526 | -453.223 | 0.3088868 | 0 | 0            | 0 | 0            |
| cov3_4_6_7_8_9_10_11   | 50.276  | -453.235 | 0.308627  | 0 | 0            | 0 | 0            |
| cov4_5_6_7_8_9_10_11   | 50.7569 | -453.476 | 0.3121313 | 0 | 0            | 0 | 0            |
| cov1_2_3_4_5_6_7_9_11  | 52.4172 | -450.808 | 0.3180814 | 0 | -0.25865883  | 0 | -0.077100175 |
| cov1_2_3_4_5_6_8_9_11  | 52.4185 | -450.809 | 0.3181196 | 0 | -0.25941208  | 0 | -0.077061546 |
| cov1_2_3_4_5_6_9_10_11 | 52.4273 | -450.813 | 0.3186805 | 0 | -0.26899857  | 0 | -0.076800894 |
| cov1_2_4_5_6_7_9_10_11 | 52.428  | -450.814 | 0.3190602 | 0 | -0.26815389  | 0 | -0.078353807 |
| cov1_2_4_5_6_8_9_10_11 | 52.4282 | -450.814 | 0.3190545 | 0 | -0.26830838  | 0 | -0.078299821 |
| cov1_2_4_5_6_7_8_9_11  | 52.4307 | -450.815 | 0.3190309 | 0 | -0.26731545  | 0 | -0.078168084 |
| cov1_2_3_5_6_7_9_10_11 | 52.4369 | -450.818 | 0.3176551 | 0 | -0.26964725  | 0 | -0.066619304 |
| cov1_2_3_5_6_8_9_10_11 | 52.4379 | -450.819 | 0.3176942 | 0 | -0.27027014  | 0 | -0.066646234 |
| cov1_2_3_5_6_7_8_9_11  | 52.4411 | -450.82  | 0.3176474 | 0 | -0.2691631   | 0 | -0.066275741 |
| cov1_2_5_6_7_8_9_10_11 | 52.4527 | -450.826 | 0.3186691 | 0 | -0.2793237   | 0 | -0.067427062 |
| cov1_2_3_4_6_7_9_10_11 | 52.4655 | -450.832 | 0.317062  | 0 | -0.22780405  | 0 | -0.085724425 |
| cov1_2_3_4_6_7_8_9_11  | 52.4671 | -450.833 | 0.3170728 | 0 | -0.22771774  | 0 | -0.085456914 |
| cov1_2_3_4_6_8_9_10_11 | 52.4687 | -450.834 | 0.3170983 | 0 | -0.22833739  | 0 | -0.085831191 |
| cov1_2_3_4_5_6_7_10_11 | 52.5205 | -450.86  | 0.3184426 | 0 | -0.26264143  | 0 | -0.076442106 |
| cov1_2_3_4_5_6_8_10_11 | 52.5217 | -450.86  | 0.3184797 | 0 | -0.26336584  | 0 | -0.076400284 |
| cov1_2_4_6_7_8_9_10_11 | 52.528  | -450.864 | 0.3187618 | 0 | -0.23149452  | 0 | -0.092765992 |
| cov1_2_4_5_6_7_8_10_11 | 52.5314 | -450.865 | 0.3193053 | 0 | -0.27034955  | 0 | -0.077409366 |
| cov1_2_3_5_6_7_8_10_11 | 52.5447 | -450.872 | 0.3180051 | 0 | -0.27323666  | 0 | -0.065566465 |
| cov1_2_3_4_6_7_8_10_11 | 52.5768 | -450.888 | 0.317388  | 0 | -0.22990789  | 0 | -0.085219737 |
| cov1_2_3_6_7_8_9_10_11 | 52.6144 | -450.907 | 0.3142962 | 0 | -0.21923118  | 0 | -0.062977504 |
| cov1_3_4_5_6_7_9_10_11 | 52.9308 | -451.065 | 0.3155949 | 0 | -0.31782149  | 0 | 0            |
| cov1_3_4_5_6_8_9_10_11 | 52.9316 | -451.065 | 0.3156228 | 0 | -0.31837023  | 0 | 0            |
| cov1_3_4_5_6_7_8_9_11  | 52.9322 | -451.066 | 0.3155882 | 0 | -0.31718977  | 0 | 0            |
| cov1_4_5_6_7_8_9_10_11 | 52.9626 | -451.081 | 0.3169586 | 0 | -0.3321667   | 0 | 0            |
| cov1_3_4_5_6_7_8_10_11 | 53.0265 | -451.113 | 0.3159398 | 0 | -0.32037573  | 0 | 0            |
| cov1_3_5_6_7_8_9_10_11 | 53.088  | -451.144 | 0.3158074 | 0 | -0.30884317  | 0 | 0            |
| cov1_2_3_4_5_6_7_8_9   | 53.1171 | -451.158 | 0.3162084 | 0 | -0.22047743  | 0 | -0.070532568 |
| cov1_2_3_4_5_6_7_9_10  | 53.1173 | -451.158 | 0.3162133 | 0 | -0.22093425  | 0 | -0.070591169 |
| cov1_2_3_4_5_6_8_9_10  | 53.1213 | -451.16  | 0.3162698 | 0 | -0.22214276  | 0 | -0.070506604 |
| cov1_2_4_5_6_7_8_9_10  | 53.1332 | -451.166 | 0.31723   | 0 | -0.2302527   | 0 | -0.071713726 |
| cov1_2_3_5_6_7_8_9_10  | 53.1356 | -451.167 | 0.3158267 | 0 | -0.23029153  | 0 | -0.061030482 |
| cov1_2_3_4_6_7_8_9_10  | 53.1612 | -451.18  | 0.3152676 | 0 | -0.19194292  | 0 | -0.078434984 |
| cov1_3_4_6_7_8_9_10_11 | 53.1865 | -451.193 | 0.3125507 | 0 | -0.25944051  | 0 | 0            |
| cov1_2_3_4_5_6_7_8_10  | 53.21   | -451.205 | 0.3165566 | 0 | -0.22437256  | 0 | -0.069869532 |
| cov1_2_3_4_5_6_7_8_11  | 53.2485 | -451.224 | 0.3214118 | 0 | -0.30676637  | 0 | -0.077908915 |
| cov1_3_4_5_6_7_8_9_10  | 53.5509 | -451.375 | 0.3140791 | 0 | -0.27691576  | 0 | 0            |
| cov2_3_4_5_6_7_8_9_11  | 54.2538 | -451.727 | 0.3129603 | 0 | 0            | 0 | -0.1397677   |
| cov2_3_4_5_6_7_9_10_11 | 54.2656 | -451.732 | 0.3129705 | 0 | 0            | 0 | -0.14016857  |

|                            |         |          |           |   |              |   |              |
|----------------------------|---------|----------|-----------|---|--------------|---|--------------|
| cov2_3_4_5_6_8_9_10_11     | 54.2996 | -451.749 | 0.3130758 | 0 | 0            | 0 | -0.14088176  |
| cov2_3_4_5_6_7_8_10_11     | 54.4197 | -451.809 | 0.3133511 | 0 | 0            | 0 | -0.13995914  |
| cov2_3_4_5_6_7_8_9_10      | 54.5354 | -451.867 | 0.3122672 | 0 | 0            | 0 | -0.12954546  |
| cov2_3_5_6_7_8_9_10_11     | 54.7371 | -451.968 | 0.310058  | 0 | 0            | 0 | -0.1010658   |
| cov2_4_5_6_7_8_9_10_11     | 54.7564 | -451.978 | 0.3181507 | 0 | 0            | 0 | -0.1604891   |
| cov2_3_4_6_7_8_9_10_11     | 55.3487 | -452.274 | 0.3162038 | 0 | 0            | 0 | -0.13430327  |
| cov1_2_3_4_5_7_8_9_11      | 55.4621 | -452.331 | 0.3188304 | 0 | -0.10928679  | 0 | -0.0771824   |
| cov1_2_4_5_7_8_9_10_11     | 55.4734 | -452.336 | 0.3199569 | 0 | -0.1202131   | 0 | -0.078661605 |
| cov1_2_3_4_5_7_9_10_11     | 55.5022 | -452.351 | 0.3188869 | 0 | -0.11036414  | 0 | -0.077305783 |
| cov1_2_3_5_7_8_9_10_11     | 55.5101 | -452.355 | 0.318294  | 0 | -0.12538008  | 0 | -0.061062147 |
| cov1_2_3_4_5_8_9_10_11     | 55.5121 | -452.356 | 0.3190696 | 0 | -0.11325984  | 0 | -0.07714603  |
| cov1_2_3_4_7_8_9_10_11     | 55.5133 | -452.356 | 0.3176786 | 0 | -0.076392231 | 0 | -0.086451364 |
| cov1_2_3_4_5_7_8_10_11     | 55.5285 | -452.364 | 0.3191408 | 0 | -0.11362543  | 0 | -0.076739119 |
| cov2_3_4_5_7_8_9_10_11     | 55.8677 | -452.533 | 0.316072  | 0 | 0            | 0 | -0.11072056  |
| cov1_3_4_5_7_8_9_10_11     | 55.9721 | -452.586 | 0.3164457 | 0 | -0.16890318  | 0 | 0            |
| cov3_4_5_6_7_8_9_10_11     | 56.3355 | -452.767 | 0.3050315 | 0 | 0            | 0 | 0            |
| cov1_2_3_4_5_7_8_9_10      | 56.4556 | -452.827 | 0.3168131 | 0 | -0.0566272   | 0 | -0.069389038 |
| cov1_2_3_4_5_6_7_9_10_11   | 59.4077 | -450.806 | 0.3180763 | 0 | -0.25894389  | 0 | -0.077300601 |
| cov1_2_3_4_5_6_8_9_10_11   | 59.409  | -450.807 | 0.3181149 | 0 | -0.25970457  | 0 | -0.077263709 |
| cov1_2_3_4_5_6_7_8_9_11    | 59.4112 | -450.808 | 0.3180725 | 0 | -0.25830201  | 0 | -0.077121745 |
| cov1_2_4_5_6_7_8_9_10_11   | 59.422  | -450.813 | 0.3190536 | 0 | -0.26782725  | 0 | -0.07837654  |
| cov1_2_3_5_6_7_8_9_10_11   | 59.431  | -450.818 | 0.3176441 | 0 | -0.26930906  | 0 | -0.066591695 |
| cov1_2_3_4_6_7_8_9_10_11   | 59.4594 | -450.832 | 0.3170539 | 0 | -0.22745664  | 0 | -0.085741552 |
| cov1_2_3_4_5_6_7_8_10_11   | 59.5145 | -450.859 | 0.3184343 | 0 | -0.26229404  | 0 | -0.076458448 |
| cov1_3_4_5_6_7_8_9_10_11   | 59.9249 | -451.065 | 0.3155828 | 0 | -0.31749586  | 0 | 0            |
| cov1_2_3_4_5_6_7_8_9_10    | 60.111  | -451.158 | 0.3162041 | 0 | -0.22055071  | 0 | -0.070615168 |
| cov2_3_4_5_6_7_8_9_10_11   | 61.2474 | -451.726 | 0.3129576 | 0 | 0            | 0 | -0.13990415  |
| cov1_2_3_4_5_7_8_9_10_11   | 62.4483 | -452.326 | 0.3188232 | 0 | -0.10980813  | 0 | -0.077461252 |
| cov1_2_3_4_5_6_7_8_9_10_11 | 66.4016 | -450.806 | 0.3180695 | 0 | -0.25856812  | 0 | -0.077341577 |

[illegible]

|   |              |   |              |   |              |              |              |
|---|--------------|---|--------------|---|--------------|--------------|--------------|
| 0 | -0.01089794  | 0 | 0            | 0 | 0            | 0            | 0            |
| 0 | -0.11110538  | 0 | 0            | 0 | 0            | 0            | 0.1451668    |
| 0 | -0.10867391  | 0 | 0            | 0 | 0            | 0            | 0            |
| 0 | -0.050603621 | 0 | -0.054496622 | 0 | 0            | 0            | 0            |
| 0 | 0            | 0 | 0            | 0 | 0            | 0.20347739   | 0            |
| 0 | -0.045974853 | 0 | 0            | 0 | -0.052417646 | 0            | 0            |
| 0 | 0            | 0 | 0            | 0 | 0            | 0.20258938   | 0            |
| 0 | 0            | 0 | 0            | 0 | -0.04817451  | 0            | 0.042807125  |
| 0 | 0            | 0 | 0            | 0 | -0.048217445 | 0            | 0            |
| 0 | 0            | 0 | 0            | 0 | 0            | -0.047831426 | 0.040990112  |
| 0 | -0.030484168 | 0 | 0            | 0 | 0            | -0.046042497 | 0            |
| 0 | 0            | 0 | 0            | 0 | 0            | -0.047806288 | 0            |
| 0 | 0            | 0 | -0.028738845 | 0 | 0            | -0.029239216 | 0            |
| 0 | 0            | 0 | -0.046116732 | 0 | 0            | 0            | 0.035160718  |
| 0 | 0            | 0 | -0.046235554 | 0 | 0            | 0            | 0            |
| 0 | 0            | 0 | 0            | 0 | -0.027593012 | 0            | -0.027243326 |
| 0 | 0            | 0 | -0.025479356 | 0 | -0.026854762 | 0            | 0            |
| 0 | 0            | 0 | -0.040468836 | 0 | 0            | 0            | 0            |
| 0 | 0            | 0 | 0            | 0 | -0.043323049 | 0            | 0            |
| 0 | 0            | 0 | 0            | 0 | 0            | -0.046116635 | 0            |
| 0 | 0            | 0 | 0            | 0 | 0            | 0            | 0.055139892  |
| 0 | 0            | 0 | 0            | 0 | 0.10627779   | 0            | 0.18197678   |
| 0 | 0            | 0 | 0            | 0 | 0            | 0            | 0            |
| 0 | -0.028636222 | 0 | 0            | 0 | 0            | 0            | 0            |
| 0 | 0            | 0 | 0            | 0 | 0            | 0.17174755   | 0            |
| 0 | 0            | 0 | 0            | 0 | 0            | 0            | 0.23008522   |
| 0 | 0            | 0 | 0            | 0 | 0            | 0.18520589   | 0            |
| 0 | 0            | 0 | 0            | 0 | 0            | 0.085651878  | 0            |
| 0 | -0.026932672 | 0 | 0            | 0 | 0            | 0.18205661   | 0            |
| 0 | 0            | 0 | 0.028089986  | 0 | 0            | 0.17856259   | 0            |
| 0 | 0            | 0 | 0            | 0 | 0            | 0.082338328  | 0            |
| 0 | 0            | 0 | 0            | 0 | 0            | 0.17916574   | 0.028542255  |
| 0 | 0            | 0 | 0            | 0 | 0            | 0.17954076   | 0            |
| 0 | 0            | 0 | 0            | 0 | 0            | 0            | 0            |
| 0 | 0            | 0 | 0            | 0 | 0.10444886   | 0            | 0            |
| 0 | 0            | 0 | 0            | 0 | 0            | 0            | 0            |
| 0 | 0            | 0 | 0            | 0 | 0            | 0            | 0            |
| 0 | 0            | 0 | 0            | 0 | 0            | 0            | 0            |
| 0 | 0            | 0 | 0            | 0 | 0            | 0            | 0            |
| 0 | 0            | 0 | 0.040955182  | 0 | 0            | 0            | 0            |
| 0 | 0            | 0 | 0.040756909  | 0 | 0            | 0            | 0            |
| 0 | 0            | 0 | 0            | 0 | 0            | 0            | 0.02935618   |
| 0 | 0            | 0 | 0            | 0 | 0.068740454  | 0            | 0            |
| 0 | 0            | 0 | 0            | 0 | 0            | 0            | 0            |
| 0 | 0            | 0 | 0            | 0 | 0.022652552  | 0            | 0            |
| 0 | 0            | 0 | 0            | 0 | 0.10735824   | 0            | 0            |
| 0 | 0            | 0 | 0            | 0 | 0.069269503  | 0            | 0            |
| 0 | 0            | 0 | 0            | 0 | 0            | 0            | 0.02936171   |





|   |              |              |   |              |              |             |
|---|--------------|--------------|---|--------------|--------------|-------------|
| 0 | 0            | -0.053705907 | 0 | 0            | 0.029674395  | 0           |
| 0 | 0            | 0            | 0 | 0.03948869   | 0            | 0.036453027 |
| 0 | 0            | 0            | 0 | -0.050609333 | 0            | 0           |
| 0 | 0            | 0            | 0 | 0.039466439  | 0            | 0           |
| 0 | 0            | 0            | 0 | -0.035652778 | 0            | 0.030336115 |
| 0 | 0            | 0            | 0 | -0.035686661 | 0            | 0           |
| 0 | -0.02240488  | -0.03871701  | 0 | 0            | 0            | 0           |
| 0 | -0.018936118 | 0            | 0 | -0.037990786 | 0            | 0           |
| 0 | 0            | -0.033799917 | 0 | 0            | 0            | 0.024697171 |
| 0 | 0            | -0.033923265 | 0 | 0            | 0            | 0           |
| 0 | 0            | 0            | 0 | -0.037933037 | 0            | 0.030231054 |
| 0 | 0            | 0            | 0 | -0.052257819 | 0            | 0           |
| 0 | 0            | -0.017457412 | 0 | -0.020906512 | 0            | 0           |
| 0 | 0            | 0            | 0 | -0.037967662 | 0            | 0           |
| 0 | 0            | -0.041748389 | 0 | 0            | 0            | 0           |
| 0 | 0            | -0.053436628 | 0 | 0            | 0.026253622  | 0           |
| 0 | 0            | 0            | 0 | 0            | 0            | 0.034853252 |
| 0 | 0            | 0            | 0 | -0.036397743 | 0            | 0           |
| 0 | -0.018790349 | 0            | 0 | -0.040200483 | 0            | 0           |
| 0 | -0.013510139 | 0            | 0 | 0.035282444  | 0            | 0           |
| 0 | 0            | 0            | 0 | 0            | 0            | 0           |
| 0 | -0.022413612 | -0.040299178 | 0 | 0            | 0            | 0           |
| 0 | 0            | -0.035499536 | 0 | 0            | 0            | 0           |
| 0 | -0.022242441 | 0            | 0 | 0            | 0            | 0           |
| 0 | 0            | -0.035457127 | 0 | 0            | 0            | 0.024394701 |
| 0 | -0.058139311 | 0            | 0 | 0            | 0            | 0.085798546 |
| 0 | 0            | -0.035579946 | 0 | 0            | 0            | 0           |
| 0 | 0            | -0.01601467  | 0 | -0.024464723 | 0            | 0           |
| 0 | 0            | -0.042361514 | 0 | 0            | 0            | 0           |
| 0 | -0.055551849 | 0            | 0 | 0            | 0            | 0           |
| 0 | 0            | 0.036040919  | 0 | 0            | 0            | 0.038247356 |
| 0 | 0            | 0.035875877  | 0 | 0            | 0            | 0           |
| 0 | 0            | 0            | 0 | 0            | 0            | 0.22502734  |
| 0 | -0.058341922 | 0            | 0 | 0            | 0            | 0.086221378 |
| 0 | -0.055723306 | 0            | 0 | 0            | 0            | 0           |
| 0 | -0.014095925 | 0.027071979  | 0 | 0            | 0            | 0           |
| 0 | 0            | 0            | 0 | 0            | 0            | 0.21710702  |
| 0 | 0            | 0            | 0 | 0            | 0            | 0.035648529 |
| 0 | 0            | 0            | 0 | 0            | 0            | 0           |
| 0 | 0            | 0            | 0 | 0            | 0            | 0.25821257  |
| 0 | 0            | 0            | 0 | 0            | -0.01166524  | 0.031262421 |
| 0 | 0            | 0            | 0 | 0            | -0.011621438 | 0           |
| 0 | 0            | 0            | 0 | 0            | 0            | 0.031509598 |
| 0 | 0            | 0            | 0 | 0            | 0            | 0           |
| 0 | 0            | 0            | 0 | 0            | 0            | 0.036450237 |
| 0 | -0.010851621 | 0            | 0 | 0            | -0.01169866  | 0           |
| 0 | 0            | 0            | 0 | 0            | 0            | 0           |

|   |              |   |              |   |              |   |              |   |             |
|---|--------------|---|--------------|---|--------------|---|--------------|---|-------------|
| 0 | -0.00904563  | 0 | 0            | 0 | 0            | 0 | 0            | 0 | 0           |
| 0 | 0            | 0 | 0            | 0 | 0            | 0 | -0.007270515 | 0 | 0           |
| 0 | 0            | 0 | 0            | 0 | 0            | 0 | -0.014664533 | 0 | 0.031287884 |
| 0 | 0            | 0 | 0            | 0 | 0            | 0 | -0.011990234 | 0 | 0           |
| 0 | 0            | 0 | 0            | 0 | 0            | 0 | 0            | 0 | 0           |
| 0 | 0            | 0 | 0            | 0 | 0            | 0 | -0.014622651 | 0 | 0           |
| 0 | -0.011216215 | 0 | 0            | 0 | 0            | 0 | 0            | 0 | 0           |
| 0 | 0            | 0 | 0            | 0 | 0            | 0 | 0            | 0 | 0.25727451  |
| 0 | -0.12198563  | 0 | 0            | 0 | -0.055417844 | 0 | 0            | 0 | 0.15154944  |
| 0 | -0.010394376 | 0 | 0            | 0 | 0            | 0 | -0.014723071 | 0 | 0           |
| 0 | 0            | 0 | 0            | 0 | 0            | 0 | -0.009510945 | 0 | 0           |
| 0 | -0.008060465 | 0 | 0            | 0 | 0            | 0 | 0            | 0 | 0           |
| 0 | -0.11954254  | 0 | 0            | 0 | -0.055370244 | 0 | 0            | 0 | 0           |
| 0 | -0.12113574  | 0 | -0.053080358 | 0 | 0            | 0 | 0            | 0 | 0.14201656  |
| 0 | -0.11879239  | 0 | -0.053165785 | 0 | 0            | 0 | 0            | 0 | 0           |
| 0 | -0.096443512 | 0 | 0            | 0 | 0            | 0 | -0.035679366 | 0 | 0.12853263  |
| 0 | -0.093882034 | 0 | 0            | 0 | 0            | 0 | -0.035816282 | 0 | 0           |
| 0 | -0.10041177  | 0 | 0            | 0 | 0            | 0 | 0            | 0 | 0.14252362  |
| 0 | -0.097969303 | 0 | 0            | 0 | 0            | 0 | 0            | 0 | 0           |
| 0 | 0            | 0 | 0            | 0 | 0            | 0 | 0.19477757   | 0 | 0           |
| 0 | 0            | 0 | 0            | 0 | 0            | 0 | 0.19386785   | 0 | 0           |
| 0 | 0            | 0 | 0            | 0 | 0            | 0 | 0.20751639   | 0 | 0           |
| 0 | 0            | 0 | 0            | 0 | 0            | 0 | 0.20642034   | 0 | 0           |
| 0 | -0.11137099  | 0 | 0            | 0 | 0            | 0 | 0            | 0 | 0.3495742   |
| 0 | 0            | 0 | 0            | 0 | 0.055577734  | 0 | 0.19932704   | 0 | 0           |
| 0 | 0            | 0 | 0            | 0 | 0.055972882  | 0 | 0.19841247   | 0 | 0           |
| 0 | -0.049525017 | 0 | -0.035743381 | 0 | -0.021708359 | 0 | 0            | 0 | 0           |
| 0 | -0.046010911 | 0 | -0.044668551 | 0 | 0            | 0 | -0.013721531 | 0 | 0           |
| 0 | 0            | 0 | 0            | 0 | 0            | 0 | 0.20216473   | 0 | 0.02027961  |
| 0 | 0            | 0 | 0            | 0 | 0            | 0 | 0.2024366    | 0 | 0           |
| 0 | -0.052023466 | 0 | -0.056435225 | 0 | 0            | 0 | 0            | 0 | 0           |
| 0 | 0            | 0 | 0            | 0 | 0.10591051   | 0 | 0.17315815   | 0 | 0           |
| 0 | -0.009301097 | 0 | 0            | 0 | 0            | 0 | 0.20347954   | 0 | 0           |
| 0 | 0            | 0 | 0            | 0 | 0            | 0 | 0.20352979   | 0 | 0           |
| 0 | 0            | 0 | 0.002051035  | 0 | 0            | 0 | 0.20318943   | 0 | 0           |
| 0 | 0            | 0 | 0            | 0 | 0            | 0 | 0.20128295   | 0 | 0.020122137 |
| 0 | 0            | 0 | 0            | 0 | 0            | 0 | 0.201553     | 0 | 0           |
| 0 | -0.050601327 | 0 | 0            | 0 | -0.060287186 | 0 | 0            | 0 | 0           |
| 0 | -0.043292706 | 0 | 0            | 0 | -0.044970039 | 0 | -0.009245444 | 0 | 0           |
| 0 | -0.008656976 | 0 | 0            | 0 | 0            | 0 | 0.20257766   | 0 | 0           |
| 0 | 0            | 0 | 0            | 0 | 0.10921255   | 0 | 0.18690988   | 0 | 0           |
| 0 | 0            | 0 | 0.002603974  | 0 | 0            | 0 | 0.20223112   | 0 | 0           |
| 0 | 0            | 0 | -0.025397826 | 0 | 0            | 0 | -0.030442416 | 0 | 0.036903204 |
| 0 | 0            | 0 | -0.025681253 | 0 | 0            | 0 | -0.030226319 | 0 | 0           |
| 0 | 0            | 0 | 0            | 0 | -0.028192796 | 0 | -0.025532152 | 0 | 0.041495072 |
| 0 | 0            | 0 | 0            | 0 | -0.02837663  | 0 | -0.025354849 | 0 | 0           |
| 0 | 0            | 0 | 0            | 0 | -0.037923544 | 0 | 0            | 0 | 0.046958464 |

|   |              |   |              |   |              |   |              |             |
|---|--------------|---|--------------|---|--------------|---|--------------|-------------|
| 0 | 0            | 0 | -0.033799294 | 0 | 0            | 0 | 0            | 0.042882273 |
| 0 | 0            | 0 | 0            | 0 | -0.038168703 | 0 | 0            | 0           |
| 0 | 0            | 0 | -0.017228455 | 0 | -0.033296322 | 0 | 0            | 0.039764673 |
| 0 | 0            | 0 | 0            | 0 | -0.048111944 | 0 | 0            | 0.21945233  |
| 0 | 0            | 0 | 0            | 0 | 0            | 0 | -0.048324107 | 0.2715129   |
| 0 | 0            | 0 | -0.034106304 | 0 | 0            | 0 | 0            | 0           |
| 0 | 0            | 0 | -0.017573196 | 0 | -0.033039957 | 0 | 0            | 0           |
| 0 | 0            | 0 | 0            | 0 | 0            | 0 | -0.038561041 | 0.044811728 |
| 0 | 0            | 0 | 0            | 0 | 0            | 0 | -0.038732406 | 0           |
| 0 | -0.030921298 | 0 | 0            | 0 | 0            | 0 | -0.047708175 | 0           |
| 0 | 0            | 0 | -0.025029807 | 0 | -0.006120781 | 0 | -0.026958815 | 0           |
| 0 | 0            | 0 | -0.028709059 | 0 | 0            | 0 | -0.029076167 | 0           |
| 0 | 0            | 0 | -0.046050744 | 0 | 0            | 0 | 0            | 0.2117975   |
| 0 | 0            | 0 | -0.043282268 | 0 | 0.14542394   | 0 | 0.18564684   | 0           |
| 0 | 0            | 0 | 0            | 0 | -0.027954638 | 0 | -0.02801516  | 0           |
| 0 | 0            | 0 | -0.026025293 | 0 | -0.02029282  | 0 | 0            | 0           |
| 0 | 0            | 0 | 0            | 0 | 0.10464167   | 0 | 0.18082565   | 0.022072103 |
| 0 | 0            | 0 | 0            | 0 | 0.10464071   | 0 | 0.18112021   | 0           |
| 0 | 0            | 0 | 0            | 0 | 0            | 0 | 0            | 0.24601153  |
| 0 | 0.005738991  | 0 | 0            | 0 | 0.10994057   | 0 | 0.18171728   | 0           |
| 0 | 0            | 0 | 0            | 0 | 0            | 0 | 0.17612243   | 0           |
| 0 | 0            | 0 | 0.069117193  | 0 | 0            | 0 | 0.18335814   | 0           |
| 0 | -0.039003025 | 0 | 0            | 0 | 0            | 0 | 0.17248879   | 0           |
| 0 | -0.078570626 | 0 | 0            | 0 | 0            | 0 | 0.17967087   | 0.10035289  |
| 0 | -0.077580347 | 0 | 0            | 0 | 0            | 0 | 0.18096623   | 0           |
| 0 | 0            | 0 | 0.029121049  | 0 | 0            | 0 | 0.16953177   | 0           |
| 0 | 0            | 0 | 0            | 0 | 0            | 0 | 0.1716107    | 0.00933343  |
| 0 | 0            | 0 | 0            | 0 | 0            | 0 | 0.1717298    | 0           |
| 0 | -0.025314995 | 0 | 0            | 0 | 0            | 0 | 0.18646002   | 0           |
| 0 | 0            | 0 | 0            | 0 | 0            | 0 | 0.1837283    | 0.029701524 |
| 0 | 0            | 0 | 0            | 0 | 0            | 0 | 0.18411822   | 0           |
| 0 | 0            | 0 | 0            | 0 | -0.033253318 | 0 | 0.106528     | 0           |
| 0 | 0            | 0 | 0            | 0 | 0            | 0 | 0.073381443  | 0           |
| 0 | 0            | 0 | 0            | 0 | 0            | 0 | 0.085628711  | 0.029247976 |
| 0 | 0            | 0 | 0            | 0 | 0            | 0 | 0.08577758   | 0           |
| 0 | 0            | 0 | 0.022101909  | 0 | 0            | 0 | 0.080788888  | 0           |
| 0 | 0            | 0 | 0.03082057   | 0 | 0            | 0 | 0.17670292   | 0.032498829 |
| 0 | 0            | 0 | 0.030753164  | 0 | 0            | 0 | 0.17713688   | 0           |
| 0 | -0.007285514 | 0 | 0            | 0 | 0            | 0 | 0.085583366  | 0           |
| 0 | 0            | 0 | 0            | 0 | -0.034166774 | 0 | 0.1036477    | 0           |
| 0 | 0            | 0 | 0            | 0 | 0            | 0 | 0.085739327  | 0           |
| 0 | 0            | 0 | 0            | 0 | 0            | 0 | 0.082344147  | 0.029354087 |
| 0 | 0            | 0 | 0            | 0 | 0            | 0 | 0.082491913  | 0           |
| 0 | 0            | 0 | 0            | 0 | 0            | 0 | 0.070541927  | 0           |
| 0 | -0.019831322 | 0 | 0.019837506  | 0 | 0            | 0 | 0.18021905   | 0           |
| 0 | 0            | 0 | 0            | 0 | 0.10730181   | 0 | 0            | 0           |
| 0 | 0            | 0 | 0.022781211  | 0 | 0            | 0 | 0.077438718  | 0           |

|   |              |   |              |   |              |   |             |   |             |
|---|--------------|---|--------------|---|--------------|---|-------------|---|-------------|
| 0 | -0.007016978 | 0 | 0            | 0 | 0            | 0 | 0.082286617 | 0 | 0           |
| 0 | 0            | 0 | 0            | 0 | 0            | 0 | 0.17903291  | 0 | 0.038951484 |
| 0 | 0            | 0 | 0            | 0 | 0            | 0 | 0           | 0 | 0           |
| 0 | 0            | 0 | 0            | 0 | 0.070441891  | 0 | 0           | 0 | 0           |
| 0 | 0            | 0 | 0            | 0 | 0.071512614  | 0 | 0           | 0 | 0           |
| 0 | 0            | 0 | 0            | 0 | 0            | 0 | 0           | 0 | 0           |
| 0 | 0            | 0 | 0.037916772  | 0 | 0            | 0 | 0           | 0 | 0           |
| 0 | 0            | 0 | 0.076911449  | 0 | 0            | 0 | 0           | 0 | 0           |
| 0 | 0            | 0 | 0.038083747  | 0 | 0            | 0 | 0           | 0 | 0           |
| 0 | 0            | 0 | -0.031116192 | 0 | 0.13258631   | 0 | 0           | 0 | 0           |
| 0 | -0.023141454 | 0 | 0            | 0 | 0            | 0 | 0           | 0 | 0           |
| 0 | -0.017418444 | 0 | 0            | 0 | 0            | 0 | 0           | 0 | 0           |
| 0 | -0.022691294 | 0 | 0            | 0 | 0            | 0 | 0           | 0 | 0           |
| 0 | 0            | 0 | 0            | 0 | 0            | 0 | 0           | 0 | 0.015254743 |
| 0 | 0            | 0 | 0            | 0 | 0            | 0 | 0           | 0 | 0           |
| 0 | 0            | 0 | 0.014594148  | 0 | 0            | 0 | 0           | 0 | 0           |
| 0 | 0            | 0 | 0            | 0 | 0.004238683  | 0 | 0           | 0 | 0           |
| 0 | -0.006710337 | 0 | 0            | 0 | 0.10015903   | 0 | 0           | 0 | 0           |
| 0 | 0            | 0 | 0            | 0 | 0            | 0 | 0           | 0 | 0           |
| 0 | 0            | 0 | 0            | 0 | 0.10415534   | 0 | 0           | 0 | 0.00404133  |
| 0 | 0            | 0 | 0            | 0 | 0.10426253   | 0 | 0           | 0 | 0           |
| 0 | 0            | 0 | 0            | 0 | 0            | 0 | 0           | 0 | 0.005407512 |
| 0 | 0            | 0 | 0            | 0 | 0            | 0 | 0           | 0 | 0           |
| 0 | 0            | 0 | 0            | 0 | 0            | 0 | 0           | 0 | 0           |
| 0 | 0            | 0 | 0.015097379  | 0 | 0            | 0 | 0           | 0 | 0           |
| 0 | -0.016925093 | 0 | 0            | 0 | 0            | 0 | 0           | 0 | 0           |
| 0 | 0            | 0 | 0            | 0 | 0            | 0 | 0           | 0 | 0.015884218 |
| 0 | 0            | 0 | 0            | 0 | 0            | 0 | 0           | 0 | 0.005488213 |
| 0 | 0            | 0 | 0            | 0 | 0            | 0 | 0           | 0 | 0           |
| 0 | 0            | 0 | 0            | 0 | 0            | 0 | 0           | 0 | 0           |
| 0 | 0            | 0 | 0            | 0 | 0.073257884  | 0 | 0           | 0 | 0           |
| 0 | 0            | 0 | 0            | 0 | 0.0031595    | 0 | 0           | 0 | 0           |
| 0 | 0            | 0 | 0            | 0 | 0.074290064  | 0 | 0           | 0 | 0           |
| 0 | 0            | 0 | 0.046848162  | 0 | 0            | 0 | 0           | 0 | 0.037471282 |
| 0 | 0            | 0 | 0.046516661  | 0 | 0            | 0 | 0           | 0 | 0           |
| 0 | -0.048961717 | 0 | 0            | 0 | 0            | 0 | 0           | 0 | 0.075113758 |
| 0 | 0            | 0 | 0.046757646  | 0 | 0            | 0 | 0           | 0 | 0.037538857 |
| 0 | 0            | 0 | 0.047660213  | 0 | 0            | 0 | 0           | 0 | 0           |
| 0 | -0.046524873 | 0 | 0            | 0 | 0            | 0 | 0           | 0 | 0           |
| 0 | 0            | 0 | 0.046422515  | 0 | 0            | 0 | 0           | 0 | 0           |
| 0 | -0.048811469 | 0 | 0            | 0 | 0            | 0 | 0           | 0 | 0.075071532 |
| 0 | 0            | 0 | 0.047965231  | 0 | 0            | 0 | 0           | 0 | 0           |
| 0 | -0.046347815 | 0 | 0            | 0 | 0            | 0 | 0           | 0 | 0           |
| 0 | 0.007264002  | 0 | 0.044737111  | 0 | 0            | 0 | 0           | 0 | 0           |
| 0 | -0.08496805  | 0 | 0            | 0 | 0            | 0 | 0.063038931 | 0 | 0.11541954  |
| 0 | 0            | 0 | 0.041883267  | 0 | -0.001282822 | 0 | 0           | 0 | 0           |
| 0 | 0            | 0 | 0.041034224  | 0 | 0            | 0 | 0           | 0 | 0           |

|   |              |   |              |   |              |   |             |             |
|---|--------------|---|--------------|---|--------------|---|-------------|-------------|
| 0 | 0            | 0 | 0            | 0 | 0.022788534  | 0 | 0           | 0.029505211 |
| 0 | -0.083076031 | 0 | 0            | 0 | 0            | 0 | 0.063478677 | 0           |
| 0 | 0            | 0 | 0            | 0 | 0.022763638  | 0 | 0           | 0           |
| 0 | 0            | 0 | 0            | 0 | 0.10528408   | 0 | 0           | 0.028470135 |
| 0 | 0            | 0 | 0            | 0 | 0.067435447  | 0 | 0           | 0.025345929 |
| 0 | 0            | 0 | -0.027118184 | 0 | 0.094794338  | 0 | 0           | 0           |
| 0 | 0.007486142  | 0 | 0.044628324  | 0 | 0            | 0 | 0           | 0           |
| 0 | 0            | 0 | 0            | 0 | 0.10536912   | 0 | 0           | 0           |
| 0 | 0            | 0 | 0            | 0 | 0.067559317  | 0 | 0           | 0           |
| 0 | 0            | 0 | 0.043268474  | 0 | -0.003505216 | 0 | 0           | 0           |
| 0 | 0            | 0 | 0            | 0 | 0            | 0 | 0           | 0.24612364  |
| 0 | 0            | 0 | 0            | 0 | 0.068026156  | 0 | 0           | 0.025298874 |
| 0 | 0            | 0 | -0.026683114 | 0 | 0.09515423   | 0 | 0           | 0           |
| 0 | 0            | 0 | 0            | 0 | 0            | 0 | 0           | 0.02871459  |
| 0 | 0            | 0 | 0            | 0 | 0.068108294  | 0 | 0           | 0           |
| 0 | 0            | 0 | 0            | 0 | 0.021326545  | 0 | 0           | 0.029565554 |
| 0 | 0            | 0 | 0            | 0 | 0            | 0 | 0           | 0           |
| 0 | -0.078218938 | 0 | 0            | 0 | 0            | 0 | 0           | 0.082269788 |
| 0 | -0.036777306 | 0 | 0            | 0 | 0            | 0 | 0           | 0           |
| 0 | 0.008589446  | 0 | 0            | 0 | 0.074297764  | 0 | 0           | 0           |
| 0 | 0            | 0 | 0            | 0 | 0.021298584  | 0 | 0           | 0           |
| 0 | 0.012144496  | 0 | 0            | 0 | 0.11515585   | 0 | 0           | 0           |
| 0 | 0            | 0 | 0            | 0 | 0            | 0 | 0           | 0.029318397 |
| 0 | 0            | 0 | 0            | 0 | 0.068799883  | 0 | 0           | 0           |
| 0 | 0            | 0 | 0            | 0 | 0            | 0 | 0           | 0           |
| 0 | -0.002370324 | 0 | 0            | 0 | 0.021937596  | 0 | 0           | 0           |
| 0 | 0            | 0 | 0            | 0 | 0.022768957  | 0 | 0           | 0           |
| 0 | 0            | 0 | 0            | 0 | 0            | 0 | 0           | 0.24526882  |
| 0 | 0            | 0 | 0.008989792  | 0 | 0.09946585   | 0 | 0           | 0           |
| 0 | -0.07623874  | 0 | 0            | 0 | 0            | 0 | 0           | 0           |
| 0 | 0            | 0 | 0            | 0 | 0            | 0 | 0           | 0.028576817 |
| 0 | -0.049657992 | 0 | 0            | 0 | 0            | 0 | 0           | 0.074023182 |
| 0 | 0.008967771  | 0 | 0            | 0 | 0.075018355  | 0 | 0           | 0           |
| 0 | 0            | 0 | 0            | 0 | 0            | 0 | 0           | 0           |
| 0 | -0.047253109 | 0 | 0            | 0 | 0            | 0 | 0           | 0           |
| 0 | -0.007899781 | 0 | 0            | 0 | 0            | 0 | 0           | 0           |
| 0 | 0            | 0 | 0            | 0 | 0            | 0 | 0           | 0           |
| 0 | -0.049037245 | 0 | 0            | 0 | 0            | 0 | 0           | 0.073384452 |
| 0 | -0.002486912 | 0 | 0            | 0 | 0.020388827  | 0 | 0           | 0           |
| 0 | -0.00766762  | 0 | 0            | 0 | 0            | 0 | 0           | 0           |
| 0 | -0.046609361 | 0 | 0            | 0 | 0            | 0 | 0           | 0           |
| 0 | -0.00748453  | 0 | 0            | 0 | 0            | 0 | 0           | 0           |
| 0 | -0.082275895 | 0 | 0            | 0 | 0            | 0 | 0           | 0.099158137 |
| 0 | -0.080140323 | 0 | 0            | 0 | 0            | 0 | 0           | 0           |
| 0 | 0            | 0 | 0.06255152   | 0 | 0            | 0 | 0.048655261 | 0.047360342 |
| 0 | 0            | 0 | 0.062267814  | 0 | 0            | 0 | 0.048916923 | 0           |
| 0 | 0            | 0 | 0.077067597  | 0 | 0            | 0 | 0           | 0.045566152 |

|   |              |   |              |             |              |             |             |             |
|---|--------------|---|--------------|-------------|--------------|-------------|-------------|-------------|
| 0 | 0            | 0 | 0.016058164  | 0           | 0            | 0           | 0           | 0.029899079 |
| 0 | 0            | 0 | 0.076793106  | 0           | 0            | 0           | 0           | 0           |
| 0 | 0            | 0 | 0            | 0           | 0            | 0           | 0           | 0.24049715  |
| 0 | 0            | 0 | -0.028291143 | 0           | 0.12874785   | 0           | 0           | 0.022252029 |
| 0 | 0            | 0 | 0.015864622  | 0           | 0            | 0           | 0           | 0           |
| 0 | 0            | 0 | -0.028649296 | 0           | 0.12916765   | 0           | 0           | 0           |
| 0 | -0.054289763 | 0 | 0.04531744   | 0           | 0            | 0           | 0           | 0.093031111 |
| 0 | 0            | 0 | 0            | 0           | 0            | 0           | 0           | 0.010761273 |
| 0 | 0            | 0 | 0.066897933  | 0           | 0            | 0           | 0           | 0.036541413 |
| 0 | 0            | 0 | 0            | 0           | 0            | 0           | 0           | 0           |
| 0 | 0            | 0 | 0.016438619  | 0           | 0            | 0           | 0           | 0.029812229 |
| 0 | 0            | 0 | 0.057650794  | 0           | 0            | 0.033736115 | 0           | 0           |
| 0 | 0            | 0 | 0            | 0           | 0            | 0           | 0           | 0.027421406 |
| 0 | 0            | 0 | 0            | 0           | 0            | 0           | 0           | 0.23949795  |
| 0 | 0            | 0 | 0.066612735  | 0           | 0            | 0           | 0           | 0           |
| 0 | 0            | 0 | 0.016244395  | 0           | 0            | 0           | 0           | 0           |
| 0 | 0            | 0 | 0            | 0           | 0            | 0           | 0           | 0           |
| 0 | -0.024657927 | 0 | 0            | 0.085305959 | 0            | 0           | 0           | 0.051024338 |
| 0 | 0            | 0 | 0            | 0.1030544   | 0            | 0           | 0           | 0.22633821  |
| 0 | 0.00571247   | 0 | -0.031983434 | 0           | 0.13737489   | 0           | 0           | 0           |
| 0 | -0.051693905 | 0 | 0.046085874  | 0           | 0            | 0           | 0           | 0           |
| 0 | -0.021336295 | 0 | 0            | 0.087733194 | 0            | 0           | 0           | 0           |
| 0 | 0            | 0 | 0.08299805   | 0           | -0.039280744 | 0           | 0.065710009 | 0           |
| 0 | -0.02985498  | 0 | 0.021553576  | 0           | 0            | 0           | 0           | 0           |
| 0 | -0.005641949 | 0 | 0.010828647  | 0           | 0            | 0           | 0           | 0           |
| 0 | 0            | 0 | 0.012817028  | 0           | 0            | 0           | 0           | 0           |
| 0 | -0.008789339 | 0 | 0            | 0           | 0            | 0           | 0           | 0           |
| 0 | 0            | 0 | 0.08048443   | 0           | -0.025395755 | 0           | 0           | 0           |
| 0 | -0.004900851 | 0 | 0.011498461  | 0           | 0            | 0           | 0           | 0           |
| 0 | -0.075933498 | 0 | 0            | 0           | 0            | 0           | 0           | 0.10421333  |
| 0 | -0.01113389  | 0 | 0.055842386  | 0           | 0            | 0           | 0           | 0           |
| 0 | -0.074271282 | 0 | 0            | 0           | -0.042890498 | 0           | 0           | 0.099395647 |
| 0 | -0.073669479 | 0 | 0            | 0           | 0            | 0           | 0           | 0           |
| 0 | -0.005537621 | 0 | 0.053401866  | 0           | 0            | 0.049399613 | 0           | 0           |
| 0 | -0.079295447 | 0 | 0            | 0           | 0            | 0           | 0           | 0.31067812  |
| 0 | -0.071571819 | 0 | 0            | 0           | -0.04270261  | 0           | 0           | 0           |
| 0 | -0.071100441 | 0 | 0            | 0           | 0.014952911  | 0           | 0           | 0.10131298  |
| 0 | -0.032172547 | 0 | 0            | 0           | -0.091750325 | 0           | 0.071750527 | 0           |
| 0 | 0.005773963  | 0 | 0.074890159  | 0           | 0            | 0           | 0           | 0           |
| 0 | 0            | 0 | 0.035023302  | 0           | 0            | 0           | 0           | 0.015521119 |
| 0 | -0.072927905 | 0 | -0.040692917 | 0           | 0            | 0           | 0           | 0.091361932 |
| 0 | 0            | 0 | 0.034890317  | 0           | 0            | 0           | 0           | 0           |
| 0 | -0.074522069 | 0 | 0            | 0           | -0.04476183  | 0           | 0           | 0.099649275 |
| 0 | 0            | 0 | 0.069748736  | 0           | 0            | 0           | 0           | 0.24952375  |
| 0 | -0.068430936 | 0 | 0            | 0           | 0.015801937  | 0           | 0           | 0           |
| 0 | -0.070346106 | 0 | -0.040638503 | 0           | 0            | 0           | 0           | 0           |
| 0 | 0            | 0 | 0.072486279  | 0           | -0.003983804 | 0           | 0           | 0.047880529 |

|   |              |   |              |   |              |   |             |             |
|---|--------------|---|--------------|---|--------------|---|-------------|-------------|
| 0 | -0.07179909  | 0 | 0            | 0 | -0.044587422 | 0 | 0           | 0           |
| 0 | 0            | 0 | 0.071995281  | 0 | -0.003716393 | 0 | 0           | 0           |
| 0 | -0.031593601 | 0 | 0            | 0 | 0            | 0 | 0.040894326 | 0           |
| 0 | 0            | 0 | 0            | 0 | -0.07980133  | 0 | 0.0605238   | 0.030233275 |
| 0 | 0            | 0 | 0            | 0 | -0.079992326 | 0 | 0.060742391 | 0           |
| 0 | -0.031514697 | 0 | 0            | 0 | -0.092926275 | 0 | 0.069616749 | 0           |
| 0 | -0.073362219 | 0 | -0.042130246 | 0 | 0            | 0 | 0           | 0.091628759 |
| 0 | -0.070753376 | 0 | -0.042081254 | 0 | 0            | 0 | 0           | 0           |
| 0 | 0            | 0 | -0.016455803 | 0 | -0.065764717 | 0 | 0.060308946 | 0           |
| 0 | 0            | 0 | 0            | 0 | 0            | 0 | 0.046227065 | 0.031563625 |
| 0 | 0            | 0 | 0            | 0 | -0.081320224 | 0 | 0.058738936 | 0.030063906 |
| 0 | 0            | 0 | 0            | 0 | -0.081395415 | 0 | 0.061393478 | 0           |
| 0 | 0            | 0 | 0            | 0 | -0.082717205 | 0 | 0.056062079 | 0           |
| 0 | 0            | 0 | 0            | 0 | 0            | 0 | 0.046255361 | 0           |
| 0 | 0            | 0 | 0            | 0 | -0.081512256 | 0 | 0.058957555 | 0           |
| 0 | -0.077930071 | 0 | 0            | 0 | 0            | 0 | 0           | 0.30233422  |
| 0 | 0            | 0 | 0            | 0 | 0.018205745  | 0 | 0.047439181 | 0.037735003 |
| 0 | 0            | 0 | 0            | 0 | 0            | 0 | 0           | 0.18319736  |
| 0 | 0            | 0 | 0            | 0 | 0.018074078  | 0 | 0.04768897  | 0           |
| 0 | -0.071207202 | 0 | 0.011719066  | 0 | 0            | 0 | 0           | 0.10028548  |
| 0 | 0            | 0 | 0            | 0 | 0            | 0 | 0.056280817 | 0.17424725  |
| 0 | -0.027554137 | 0 | 0            | 0 | 0.015093437  | 0 | 0           | 0           |
| 0 | 0            | 0 | 0            | 0 | 0.014550281  | 0 | 0.03570197  | 0           |
| 0 | -0.068647131 | 0 | 0.012342402  | 0 | 0            | 0 | 0           | 0           |
| 0 | 0            | 0 | -0.014657812 | 0 | -0.068843981 | 0 | 0.058497739 | 0           |
| 0 | 0            | 0 | 0            | 0 | -0.083971298 | 0 | 0.054803222 | 0           |
| 0 | -0.023133764 | 0 | 0            | 0 | 0.008105523  | 0 | 0.053388997 | 0           |
| 0 | -0.030768308 | 0 | -0.063432317 | 0 | 0            | 0 | 0.037866956 | 0           |
| 0 | 0            | 0 | 0            | 0 | 0.029042268  | 0 | 0           | 0.027742308 |
| 0 | -0.031121885 | 0 | 0            | 0 | -0.060730342 | 0 | 0           | 0           |
| 0 | 0            | 0 | 0            | 0 | 0.028916887  | 0 | 0           | 0           |
| 0 | 0.00018935   | 0 | 0.06120534   | 0 | 0.003275136  | 0 | 0           | 0           |
| 0 | -0.030467385 | 0 | 0            | 0 | -0.062068053 | 0 | 0           | 0           |
| 0 | -0.030785867 | 0 | -0.051133011 | 0 | 0            | 0 | 0           | 0           |
| 0 | 0            | 0 | -0.05133769  | 0 | 0            | 0 | 0.028028532 | 0.021788892 |
| 0 | 0            | 0 | 0            | 0 | 0            | 0 | 0           | 0.20864887  |
| 0 | 0            | 0 | 0            | 0 | -0.047604293 | 0 | 0           | 0.024527893 |
| 0 | 0            | 0 | -0.051582504 | 0 | 0            | 0 | 0.028245528 | 0           |
| 0 | -0.030017131 | 0 | -0.062841188 | 0 | 0            | 0 | 0.034158336 | 0           |
| 0 | 0            | 0 | 0            | 0 | -0.047851492 | 0 | 0           | 0           |
| 0 | 0            | 0 | 0            | 0 | 0.039675065  | 0 | 0           | 0.23209742  |
| 0 | 0            | 0 | 0            | 0 | -0.035534436 | 0 | 0           | 0.24848094  |
| 0 | 0            | 0 | -0.01561967  | 0 | -0.036741349 | 0 | 0           | 0           |
| 0 | 0            | 0 | -0.053875029 | 0 | 0            | 0 | 0.029673094 | 0           |
| 0 | 0            | 0 | -0.053758684 | 0 | 0            | 0 | 0.02939087  | 0           |
| 0 | 0            | 0 | -0.01172235  | 0 | -0.025563609 | 0 | 0           | 0.028303855 |
| 0 | -0.021535185 | 0 | -0.022345403 | 0 | -0.018997954 | 0 | 0           | 0           |

|   |              |   |              |              |              |              |             |
|---|--------------|---|--------------|--------------|--------------|--------------|-------------|
| 0 | 0            | 0 | 0            | -0.051063603 | 0            | 0            | 0           |
| 0 | 0            | 0 | 0            | -0.03605704  | 0            | 0            | 0.030197986 |
| 0 | 0            | 0 | -0.012106389 | 0            | -0.025265633 | 0            | 0           |
| 0 | 0            | 0 | 0            | 0            | -0.036092352 | 0            | 0           |
| 0 | 0            | 0 | 0            | 0            | -0.049170266 | 0            | 0.024826669 |
| 0 | 0            | 0 | -0.033678119 | 0            | 0            | 0            | 0.24311506  |
| 0 | 0            | 0 | 0            | 0            | -0.049419752 | 0            | 0           |
| 0 | -0.022245263 | 0 | -0.038807388 | 0            | 0            | 0            | 0           |
| 0 | 0            | 0 | 0            | 0            | -0.037822674 | 0            | 0.24726132  |
| 0 | -0.029962699 | 0 | -0.051457563 | 0            | 0            | 0            | 0           |
| 0 | -0.018655187 | 0 | 0            | 0            | -0.038320218 | 0            | 0           |
| 0 | 0            | 0 | -0.038405824 | 0            | 0            | 0            | 0.021330334 |
| 0 | 0            | 0 | -0.038717553 | 0            | 0            | 0            | 0           |
| 0 | 0            | 0 | -0.051049497 | 0            | 0            | 0.024614446  | 0.021814614 |
| 0 | 0            | 0 | -0.033957805 | 0            | 0            | 0            | 0.024586787 |
| 0 | 0            | 0 | -0.051297354 | 0            | 0            | 0.024832763  | 0           |
| 0 | 0            | 0 | -0.034082108 | 0            | 0            | 0            | 0           |
| 0 | 0            | 0 | -0.014198098 | 0            | -0.03963328  | 0            | 0           |
| 0 | 0            | 0 | -0.010272402 | 0            | -0.029093645 | 0            | 0.028459076 |
| 0 | -0.021281161 | 0 | -0.020944479 | 0            | -0.022392291 | 0            | 0           |
| 0 | 0            | 0 | 0            | 0            | 0            | 0            | 0.22111495  |
| 0 | 0            | 0 | -0.010654145 | 0            | -0.02879889  | 0            | 0           |
| 0 | 0            | 0 | -0.017071481 | 0            | -0.021629645 | 0            | 0           |
| 0 | 0            | 0 | -0.041839776 | 0            | 0            | 0            | 0           |
| 0 | 0            | 0 | -0.053346013 | 0            | 0            | 0.026755953  | 0           |
| 0 | -0.056490579 | 0 | 0            | 0            | 0            | 0            | 0.087753825 |
| 0 | 0            | 0 | -0.035340995 | 0            | 0            | 0            | 0.24165315  |
| 0 | -0.058272231 | 0 | 0            | 0            | 0            | 0            | 0.31641388  |
| 0 | -0.057220973 | 0 | 0            | 0            | 0            | -0.009965204 | 0.084714162 |
| 0 | 0            | 0 | -0.038916523 | 0            | 0            | 0            | 0.021894794 |
| 0 | -0.053905341 | 0 | 0            | 0            | 0            | 0            | 0           |
| 0 | 0            | 0 | -0.039229145 | 0            | 0            | 0            | 0           |
| 0 | -0.058846266 | 0 | 0            | 0            | 0            | 0            | 0.086552473 |
| 0 | -0.054591638 | 0 | 0            | 0            | 0            | -0.009898983 | 0           |
| 0 | 0            | 0 | 0.036186363  | 0            | 0            | 0            | 0.22745549  |
| 0 | -0.05621497  | 0 | 0            | 0            | 0            | 0            | 0           |
| 0 | -0.056195368 | 0 | 0            | 0            | 0            | 0            | 0.088359097 |
| 0 | -0.057067331 | 0 | 0            | 0            | 0            | -0.012912674 | 0.084706917 |
| 0 | -0.058468359 | 0 | 0            | 0            | 0            | 0            | 0.31556291  |
| 0 | -0.053575284 | 0 | 0            | 0            | 0            | 0            | 0           |
| 0 | -0.054390786 | 0 | 0            | 0            | 0            | -0.012853559 | 0           |
| 0 | 0            | 0 | 0            | 0            | 0            | 0            | 0.26223015  |
| 0 | 0            | 0 | 0            | 0            | 0            | -0.012149394 | 0.26681425  |
| 0 | 0            | 0 | 0            | 0            | 0            | -0.002057911 | 0.035214809 |
| 0 | 0            | 0 | 0            | 0            | 0            | 0            | 0.035630084 |
| 0 | 0            | 0 | 0            | 0            | 0            | -0.002225013 | 0           |
| 0 | 0            | 0 | 0            | 0            | 0            | 0            | 0           |



|   |              |   |              |   |              |              |             |             |
|---|--------------|---|--------------|---|--------------|--------------|-------------|-------------|
| 0 | 0            | 0 | 0            | 0 | 0            | 0            | 0           | 0.25822606  |
| 0 | 0            | 0 | 0            | 0 | 0            | -0.011708016 | 0           | 0.031233722 |
| 0 | -0.14497881  | 0 | 0            | 0 | -0.088275313 | 0            | 0.040233253 | 0.17410369  |
| 0 | 0            | 0 | 0            | 0 | 0            | -0.011664943 | 0           | 0           |
| 0 | 0            | 0 | 0            | 0 | 0            | 0            | 0           | 0.26213356  |
| 0 | 0            | 0 | 0            | 0 | 0            | -0.01514725  | 0           | 0.26812033  |
| 0 | 0            | 0 | 0            | 0 | 0            | -0.004224362 | 0           | 0.035550526 |
| 0 | -0.14254477  | 0 | 0            | 0 | -0.088133346 | 0            | 0.040104744 | 0           |
| 0 | -0.010012187 | 0 | 0            | 0 | 0            | -0.008615495 | 0           | 0           |
| 0 | 0            | 0 | 0            | 0 | 0            | -0.004389726 | 0           | 0           |
| 0 | -0.010787782 | 0 | 0            | 0 | 0            | -0.011730743 | 0           | 0           |
| 0 | -0.008934919 | 0 | 0            | 0 | 0            | 0            | 0           | 0           |
| 0 | 0            | 0 | 0            | 0 | 0            | -0.007269666 | 0           | 0           |
| 0 | -0.13215624  | 0 | 0            | 0 | -0.06980026  | 0            | 0           | 0.15503009  |
| 0 | -0.12238519  | 0 | -0.020128259 | 0 | -0.038064405 | 0            | 0           | 0.14835603  |
| 0 | -0.12223181  | 0 | 0            | 0 | -0.055362752 | 0            | 0           | 0.34896077  |
| 0 | -0.12963934  | 0 | 0            | 0 | -0.0696536   | 0            | 0           | 0           |
| 0 | -0.009307571 | 0 | 0            | 0 | 0            | -0.010783114 | 0           | 0           |
| 0 | -0.11998088  | 0 | -0.020638734 | 0 | -0.037576646 | 0            | 0           | 0           |
| 0 | -0.1213814   | 0 | -0.053021325 | 0 | 0            | 0            | 0           | 0.33925061  |
| 0 | -0.12576113  | 0 | -0.059116766 | 0 | 0            | 0.008474588  | 0           | 0.14561306  |
| 0 | -0.12363799  | 0 | -0.056301679 | 0 | 0            | 0            | 0           | 0.14229542  |
| 0 | -0.12343838  | 0 | -0.059196177 | 0 | 0            | 0.008465579  | 0           | 0           |
| 0 | -0.12131035  | 0 | -0.056402519 | 0 | 0            | 0            | 0           | 0           |
| 0 | 0            | 0 | 0            | 0 | 0            | 0.19847941   | 0           | 0           |
| 0 | 0            | 0 | 0            | 0 | 0            | 0.19739409   | 0           | 0           |
| 0 | -0.0965489   | 0 | 0            | 0 | 0            | -0.036170441 | 0           | 0.36467944  |
| 0 | -0.095918783 | 0 | 0            | 0 | 0            | -0.028996329 | 0           | 0.13083916  |
| 0 | 0            | 0 | 0            | 0 | 0.057590683  | 0            | 0.19027686  | 0           |
| 0 | -0.093381159 | 0 | 0            | 0 | 0            | -0.029198719 | 0           | 0           |
| 0 | 0            | 0 | 0            | 0 | 0.058435853  | 0            | 0.18931516  | 0           |
| 0 | 0            | 0 | 0            | 0 | 0.060425792  | 0            | 0.20321821  | 0           |
| 0 | -0.10066484  | 0 | 0            | 0 | 0            | 0            | 0           | 0.34975462  |
| 0 | 0            | 0 | 0            | 0 | 0.10908825   | 0            | 0.17784517  | 0           |
| 0 | 0            | 0 | 0            | 0 | 0.06137693   | 0            | 0.20207554  | 0           |
| 0 | -0.020817639 | 0 | 0            | 0 | 0            | 0.193926     | 0           | 0           |
| 0 | 0            | 0 | 0.037283954  | 0 | 0            | 0.2039738    | 0           | 0           |
| 0 | -0.020207481 | 0 | 0            | 0 | 0            | 0.19303737   | 0           | 0           |
| 0 | 0            | 0 | 0.037656922  | 0 | 0            | 0.20286701   | 0           | 0           |
| 0 | 0            | 0 | 0            | 0 | 0            | 0.19479115   | 0           | 0           |
| 0 | 0            | 0 | 0.003879402  | 0 | 0            | 0.19417049   | 0           | 0           |
| 0 | 0            | 0 | 0            | 0 | 0            | 0.19467028   | 0           | 0.002382742 |
| 0 | 0            | 0 | 0            | 0 | 0            | 0.1947027    | 0           | 0           |
| 0 | 0            | 0 | 0            | 0 | 0            | 0.20615631   | 0           | 0.021493005 |
| 0 | 0            | 0 | 0            | 0 | 0            | 0.20644331   | 0           | 0           |
| 0 | 0            | 0 | 0.004520233  | 0 | 0            | 0.19321959   | 0           | 0           |
| 0 | 0            | 0 | 0            | 0 | 0            | 0.19380411   | 0           | 0.002485728 |

|   |              |   |              |   |              |   |              |   |             |
|---|--------------|---|--------------|---|--------------|---|--------------|---|-------------|
| 0 | 0            | 0 | 0            | 0 | 0            | 0 | 0.19383781   | 0 | 0           |
| 0 | -0.007931586 | 0 | 0            | 0 | 0            | 0 | 0.20749554   | 0 | 0           |
| 0 | 0            | 0 | 0            | 0 | 0            | 0 | 0.20753243   | 0 | 0           |
| 0 | 0            | 0 | 0            | 0 | 0            | 0 | 0.20506491   | 0 | 0.02136361  |
| 0 | 0            | 0 | 0            | 0 | 0            | 0 | 0.20535028   | 0 | 0           |
| 0 | 0            | 0 | -0.035853617 | 0 | 0.089838623  | 0 | 0.20175362   | 0 | 0           |
| 0 | -0.007433467 | 0 | 0            | 0 | 0            | 0 | 0.20639164   | 0 | 0           |
| 0 | 0            | 0 | -0.035106357 | 0 | 0.089850395  | 0 | 0.20070759   | 0 | 0           |
| 0 | 0            | 0 | 0            | 0 | 0.054693321  | 0 | 0.19818504   | 0 | 0.018651118 |
| 0 | 0            | 0 | 0            | 0 | 0.054692248  | 0 | 0.19843777   | 0 | 0           |
| 0 | 0.004649212  | 0 | 0            | 0 | 0.058602226  | 0 | 0.19909962   | 0 | 0           |
| 0 | 0            | 0 | 0            | 0 | 0.055307802  | 0 | 0.19935995   | 0 | 0           |
| 0 | -0.042019367 | 0 | 0            | 0 | 0            | 0 | 0.19962382   | 0 | 0.059712489 |
| 0 | -0.041228868 | 0 | 0            | 0 | 0            | 0 | 0.20044678   | 0 | 0           |
| 0 | 0            | 0 | 0            | 0 | 0.055136859  | 0 | 0.19726743   | 0 | 0.018587253 |
| 0 | 0            | 0 | 0            | 0 | 0.055134976  | 0 | 0.19751945   | 0 | 0           |
| 0 | 0            | 0 | -0.041169676 | 0 | 0.1431541    | 0 | 0.17678132   | 0 | 0           |
| 0 | 0            | 0 | 0.073935954  | 0 | 0            | 0 | 0.17353378   | 0 | 0           |
| 0 | 0.005200945  | 0 | 0            | 0 | 0.059326225  | 0 | 0.19816879   | 0 | 0           |
| 0 | -0.041063671 | 0 | 0            | 0 | 0            | 0 | 0.19872164   | 0 | 0.058745544 |
| 0 | -0.04027354  | 0 | 0            | 0 | 0            | 0 | 0.19953351   | 0 | 0           |
| 0 | -0.054383749 | 0 | -0.036046814 | 0 | -0.029660428 | 0 | 0            | 0 | 0           |
| 0 | -0.049192846 | 0 | -0.047227114 | 0 | 0            | 0 | -0.020610915 | 0 | 0           |
| 0 | -0.047401001 | 0 | -0.035182394 | 0 | -0.016448876 | 0 | -0.007127445 | 0 | 0           |
| 0 | 0            | 0 | 0            | 0 | 0            | 0 | 0.20221694   | 0 | 0.020146839 |
| 0 | 0            | 0 | 0            | 0 | 0            | 0 | 0.20249306   | 0 | 0           |
| 0 | 0            | 0 | 0.004311766  | 0 | 0            | 0 | 0.20152183   | 0 | 0.020939354 |
| 0 | 0            | 0 | 0.004256101  | 0 | 0            | 0 | 0.20180733   | 0 | 0           |
| 0 | 0            | 0 | 0            | 0 | 0            | 0 | 0.201855     | 0 | 0.044896397 |
| 0 | -0.007660365 | 0 | 0            | 0 | 0.10101252   | 0 | 0.17323971   | 0 | 0           |
| 0 | 0            | 0 | 0            | 0 | 0.10573913   | 0 | 0.17312124   | 0 | 0.002355233 |
| 0 | 0            | 0 | 0            | 0 | 0.1057508    | 0 | 0.17315178   | 0 | 0           |
| 0 | -0.008955985 | 0 | 0            | 0 | 0            | 0 | 0.20352571   | 0 | 0           |
| 0 | -0.009853148 | 0 | -0.00173022  | 0 | 0            | 0 | 0.2037208    | 0 | 0           |
| 0 | 0            | 0 | 0            | 0 | 0.10751737   | 0 | 0.18573009   | 0 | 0.023133478 |
| 0 | 0            | 0 | 0            | 0 | 0.10751455   | 0 | 0.18603585   | 0 | 0           |
| 0 | 0            | 0 | 0.00186103   | 0 | 0            | 0 | 0.20327202   | 0 | 0           |
| 0 | -0.047879614 | 0 | 0            | 0 | -0.050753142 | 0 | -0.015716138 | 0 | 0           |
| 0 | 0            | 0 | 0.004861028  | 0 | 0            | 0 | 0.2005659    | 0 | 0.020870317 |
| 0 | 0            | 0 | 0.004803384  | 0 | 0            | 0 | 0.20085435   | 0 | 0           |
| 0 | 0            | 0 | 0            | 0 | 0            | 0 | 0.20097623   | 0 | 0.044498918 |
| 0 | 0.009032558  | 0 | 0            | 0 | 0.11500984   | 0 | 0.18655055   | 0 | 0           |
| 0 | -0.008908438 | 0 | -0.000790893 | 0 | 0            | 0 | 0.20268626   | 0 | 0           |
| 0 | 0            | 0 | 0.000777507  | 0 | 0.1085316    | 0 | 0.18687709   | 0 | 0           |
| 0 | 0            | 0 | -0.024678642 | 0 | 0            | 0 | -0.031383903 | 0 | 0.24718872  |
| 0 | 0            | 0 | 0            | 0 | -0.027097401 | 0 | -0.026837602 | 0 | 0.24709759  |
| 0 | 0            | 0 | -0.017070832 | 0 | -0.013503955 | 0 | -0.025462332 | 0 | 0.038485028 |

|   |              |   |              |   |              |   |              |   |             |
|---|--------------|---|--------------|---|--------------|---|--------------|---|-------------|
| 0 | 0            | 0 | -0.02415094  | 0 | 0            | 0 | -0.025094828 | 0 | 0.039660031 |
| 0 | 0            | 0 | -0.017458694 | 0 | -0.013340985 | 0 | -0.025299081 | 0 | 0           |
| 0 | 0            | 0 | -0.024489693 | 0 | 0            | 0 | -0.025068383 | 0 | 0           |
| 0 | 0            | 0 | 0            | 0 | -0.026432977 | 0 | -0.02164219  | 0 | 0.043640658 |
| 0 | 0            | 0 | 0            | 0 | -0.026703559 | 0 | -0.021615651 | 0 | 0           |
| 0 | 0            | 0 | -0.017282598 | 0 | -0.022979895 | 0 | 0            | 0 | 0.043914261 |
| 0 | 0            | 0 | 0            | 0 | -0.037728448 | 0 | 0            | 0 | 0.22777001  |
| 0 | 0            | 0 | -0.033640159 | 0 | 0            | 0 | 0            | 0 | 0.22503808  |
| 0 | 0            | 0 | -0.017640305 | 0 | -0.022909257 | 0 | 0            | 0 | 0           |
| 0 | 0            | 0 | -0.017182272 | 0 | -0.033273686 | 0 | 0            | 0 | 0.21590519  |
| 0 | 0            | 0 | 0            | 0 | 0            | 0 | -0.039475938 | 0 | 0.26859138  |
| 0 | -0.037918993 | 0 | 0            | 0 | 0            | 0 | 0.17677375   | 0 | 0           |
| 0 | 0            | 0 | -0.025006695 | 0 | -0.006249881 | 0 | -0.027242274 | 0 | 0           |
| 0 | 0            | 0 | -0.040111614 | 0 | 0.14147035   | 0 | 0.18461212   | 0 | 0.01464778  |
| 0 | 0            | 0 | -0.040182661 | 0 | 0.14153695   | 0 | 0.18481524   | 0 | 0           |
| 0 | 0.001018544  | 0 | -0.043093963 | 0 | 0.14590378   | 0 | 0.18558441   | 0 | 0           |
| 0 | -0.079000852 | 0 | 0            | 0 | 0            | 0 | 0.17205815   | 0 | 0.081413162 |
| 0 | -0.078182512 | 0 | 0            | 0 | 0            | 0 | 0.17308135   | 0 | 0           |
| 0 | 0            | 0 | 0.074000273  | 0 | 0            | 0 | 0.18124069   | 0 | 0.040080077 |
| 0 | 0            | 0 | 0.073884221  | 0 | 0            | 0 | 0.18177411   | 0 | 0           |
| 0 | -0.024259413 | 0 | 0            | 0 | 0.087436074  | 0 | 0.18071026   | 0 | 0.045314909 |
| 0 | -0.023288209 | 0 | 0            | 0 | 0.088110773  | 0 | 0.18130085   | 0 | 0           |
| 0 | -0.076631435 | 0 | 0            | 0 | 0            | 0 | 0.18404789   | 0 | 0.09968957  |
| 0 | -0.075655419 | 0 | 0            | 0 | 0            | 0 | 0.18533659   | 0 | 0           |
| 0 | 0            | 0 | 0            | 0 | 0.10467059   | 0 | 0.18052127   | 0 | 0.045034856 |
| 0 | 0            | 0 | 0            | 0 | 0            | 0 | 0.17598319   | 0 | 0.009129015 |
| 0 | 0            | 0 | 0            | 0 | 0            | 0 | 0.17609976   | 0 | 0           |
| 0 | 0.000794375  | 0 | 0.069579112  | 0 | 0            | 0 | 0.18330414   | 0 | 0           |
| 0 | -0.033320081 | 0 | 0.015387357  | 0 | 0            | 0 | 0.17120502   | 0 | 0           |
| 0 | -0.075948484 | 0 | 0.004756819  | 0 | 0            | 0 | 0.17927681   | 0 | 0.098566323 |
| 0 | -0.078603051 | 0 | 0            | 0 | 0            | 0 | 0.17936276   | 0 | 0.12456723  |
| 0 | -0.074866191 | 0 | 0.004943874  | 0 | 0            | 0 | 0.18052794   | 0 | 0           |
| 0 | 0            | 0 | 0.072151478  | 0 | -0.082284326 | 0 | 0.12143227   | 0 | 0           |
| 0 | 0            | 0 | 0.030185566  | 0 | 0            | 0 | 0.16925602   | 0 | 0.013340537 |
| 0 | 0            | 0 | 0.030152499  | 0 | 0            | 0 | 0.16942895   | 0 | 0           |
| 0 | 0            | 0 | 0.073413482  | 0 | -0.084124861 | 0 | 0.11901027   | 0 | 0           |
| 0 | 0            | 0 | 0            | 0 | 0            | 0 | 0.17150684   | 0 | 0.017489373 |
| 0 | -0.047856112 | 0 | 0            | 0 | 0            | 0 | 0.08514749   | 0 | 0.073981306 |
| 0 | -0.04600548  | 0 | 0            | 0 | 0            | 0 | 0.085540384  | 0 | 0           |
| 0 | 0            | 0 | 0            | 0 | 0            | 0 | 0.18361025   | 0 | 0.038963952 |
| 0 | 0            | 0 | 0            | 0 | -0.038495646 | 0 | 0.095290754  | 0 | 0           |
| 0 | 0            | 0 | 0            | 0 | 0.075685216  | 0 | 0            | 0 | 0           |
| 0 | 0            | 0 | 0            | 0 | -0.033035115 | 0 | 0.10637104   | 0 | 0.029008301 |
| 0 | 0            | 0 | 0            | 0 | -0.033183808 | 0 | 0.10661246   | 0 | 0           |
| 0 | 0            | 0 | 0            | 0 | 0.077378656  | 0 | 0            | 0 | 0           |
| 0 | -0.048067157 | 0 | 0            | 0 | 0            | 0 | 0.082003148  | 0 | 0.074374557 |
| 0 | 0            | 0 | 0.054553601  | 0 | 0            | 0 | 0            | 0 | 0           |

|   |              |   |              |   |              |   |             |   |             |
|---|--------------|---|--------------|---|--------------|---|-------------|---|-------------|
| 0 | 0            | 0 | 0.027756544  | 0 | 0            | 0 | 0.079518693 | 0 | 0.034063258 |
| 0 | 0            | 0 | 0.027454945  | 0 | 0            | 0 | 0.079758718 | 0 | 0           |
| 0 | -0.046179479 | 0 | 0            | 0 | 0            | 0 | 0.082389984 | 0 | 0           |
| 0 | -0.01720554  | 0 | 0            | 0 | -0.040855111 | 0 | 0.11113841  | 0 | 0           |
| 0 | 0            | 0 | 0.023534578  | 0 | 0            | 0 | 0.067721759 | 0 | 0           |
| 0 | 0            | 0 | 0            | 0 | 0            | 0 | 0.075816464 | 0 | 0.023325616 |
| 0 | 0            | 0 | 0            | 0 | 0            | 0 | 0.075810073 | 0 | 0           |
| 0 | 0            | 0 | 0.055154145  | 0 | 0            | 0 | 0           | 0 | 0           |
| 0 | -0.012377578 | 0 | 0            | 0 | 0            | 0 | 0.071894542 | 0 | 0           |
| 0 | 0            | 0 | 0            | 0 | -0.039052972 | 0 | 0.092697151 | 0 | 0           |
| 0 | 0            | 0 | 0            | 0 | -0.033582153 | 0 | 0.1066249   | 0 | 0           |
| 0 | 0            | 0 | 0            | 0 | 0            | 0 | 0.084860144 | 0 | 0.17470756  |
| 0 | 0            | 0 | 0            | 0 | 0            | 0 | 0.073462633 | 0 | 0           |
| 0 | 0            | 0 | 0            | 0 | -0.0338744   | 0 | 0.10347278  | 0 | 0.029030841 |
| 0 | 0            | 0 | 0            | 0 | 0            | 0 | 0.085739225 | 0 | 0.02928945  |
| 0 | 0            | 0 | 0            | 0 | -0.034024486 | 0 | 0.10371415  | 0 | 0           |
| 0 | 0            | 0 | 0            | 0 | 0            | 0 | 0.08588804  | 0 | 0           |
| 0 | 0            | 0 | 0.028560302  | 0 | 0            | 0 | 0.076203164 | 0 | 0.034349286 |
| 0 | 0            | 0 | 0.028251375  | 0 | 0            | 0 | 0.07644288  | 0 | 0           |
| 0 | 0            | 0 | 0.02237035   | 0 | 0            | 0 | 0.080897124 | 0 | 0           |
| 0 | 0.000142938  | 0 | 0.022180052  | 0 | 0            | 0 | 0.080773054 | 0 | 0           |
| 0 | -0.016873741 | 0 | 0            | 0 | -0.041546432 | 0 | 0.10812449  | 0 | 0           |
| 0 | 0            | 0 | 0.024306678  | 0 | 0            | 0 | 0.064764012 | 0 | 0           |
| 0 | 0            | 0 | 0            | 0 | 0            | 0 | 0.073053481 | 0 | 0.023798869 |
| 0 | 0            | 0 | 0            | 0 | 0            | 0 | 0.073047913 | 0 | 0           |
| 0 | 0            | 0 | 0.030840982  | 0 | 0            | 0 | 0.17647375  | 0 | 0.050327504 |
| 0 | -0.007425075 | 0 | 0            | 0 | 0            | 0 | 0.085700867 | 0 | 0           |
| 0 | -0.012001809 | 0 | 0            | 0 | 0            | 0 | 0.069096045 | 0 | 0           |
| 0 | 0            | 0 | 0            | 0 | 0            | 0 | 0.081570238 | 0 | 0.17617181  |
| 0 | 0            | 0 | 0.020504554  | 0 | 0.089299283  | 0 | 0           | 0 | 0           |
| 0 | -0.004238539 | 0 | 0            | 0 | 0.10458114   | 0 | 0           | 0 | 0           |
| 0 | 0            | 0 | 0            | 0 | 0.10703216   | 0 | 0           | 0 | 0.003700631 |
| 0 | 0            | 0 | 0            | 0 | 0.10714174   | 0 | 0           | 0 | 0           |
| 0 | 0.00067192   | 0 | 0.023146285  | 0 | 0            | 0 | 0.077364533 | 0 | 0           |
| 0 | -0.022509525 | 0 | 0            | 0 | 0            | 0 | 0           | 0 | 0           |
| 0 | 0            | 0 | -0.025605547 | 0 | 0.095032532  | 0 | 0           | 0 | 0           |
| 0 | -0.022211943 | 0 | 0            | 0 | 0            | 0 | 0           | 0 | 0           |
| 0 | 0            | 0 | -0.025310078 | 0 | 0.096053017  | 0 | 0           | 0 | 0           |
| 0 | -0.00680743  | 0 | 0            | 0 | 0.066078979  | 0 | 0           | 0 | 0           |
| 0 | 0            | 0 | 0            | 0 | 0            | 0 | 0           | 0 | 0.005400224 |
| 0 | 0            | 0 | 0            | 0 | 0            | 0 | 0           | 0 | 0           |
| 0 | 0            | 0 | 0            | 0 | 0.070998077  | 0 | 0           | 0 | 0           |
| 0 | 0            | 0 | 0            | 0 | 0            | 0 | 0           | 0 | 0           |
| 0 | 0            | 0 | 0            | 0 | 0.070290743  | 0 | 0           | 0 | 0.002614828 |
| 0 | 0            | 0 | 0            | 0 | 0.070384599  | 0 | 0           | 0 | 0           |
| 0 | -0.006352659 | 0 | 0            | 0 | 0.067489724  | 0 | 0           | 0 | 0           |
| 0 | 0            | 0 | 0            | 0 | 0.071356835  | 0 | 0           | 0 | 0.002711756 |

|   |              |   |              |   |              |   |             |   |              |
|---|--------------|---|--------------|---|--------------|---|-------------|---|--------------|
| 0 | 0            | 0 | 0            | 0 | 0.071449668  | 0 | 0           | 0 | 0            |
| 0 | 0            | 0 | 0            | 0 | 0            | 0 | 0           | 0 | 0.005522291  |
| 0 | 0            | 0 | 0            | 0 | 0            | 0 | 0           | 0 | 0            |
| 0 | 0            | 0 | 0.062949623  | 0 | -0.035475458 | 0 | 0           | 0 | 0            |
| 0 | -0.050739793 | 0 | 0            | 0 | 0            | 0 | 0           | 0 | 0.062394172  |
| 0 | -0.048461358 | 0 | 0            | 0 | 0            | 0 | 0           | 0 | 0            |
| 0 | 0            | 0 | 0.041875584  | 0 | 0            | 0 | 0           | 0 | 0.023451863  |
| 0 | 0            | 0 | 0.041535949  | 0 | 0            | 0 | 0           | 0 | 0            |
| 0 | -0.05089839  | 0 | 0            | 0 | 0            | 0 | 0           | 0 | 0.052857359  |
| 0 | -0.048781901 | 0 | 0            | 0 | 0            | 0 | 0           | 0 | 0            |
| 0 | 0            | 0 | 0.06414679   | 0 | -0.037214261 | 0 | 0           | 0 | 0            |
| 0 | 0            | 0 | 0.079112147  | 0 | 0            | 0 | 0           | 0 | 0.021082264  |
| 0 | -0.004864809 | 0 | 0.035320822  | 0 | 0            | 0 | 0           | 0 | 0            |
| 0 | 0            | 0 | 0.038318353  | 0 | 0            | 0 | 0           | 0 | 0            |
| 0 | -0.050955763 | 0 | 0            | 0 | 0            | 0 | 0           | 0 | 0.06325621   |
| 0 | 0            | 0 | 0.078912721  | 0 | 0            | 0 | 0           | 0 | 0            |
| 0 | -0.0505589   | 0 | 0            | 0 | 0            | 0 | 0           | 0 | 0.05267994   |
| 0 | -0.048648422 | 0 | 0            | 0 | 0            | 0 | 0           | 0 | 0            |
| 0 | -0.00967463  | 0 | 0.071468852  | 0 | 0            | 0 | 0           | 0 | 0            |
| 0 | -0.048422076 | 0 | 0            | 0 | 0            | 0 | 0           | 0 | 0            |
| 0 | 0            | 0 | 0.042195556  | 0 | 0            | 0 | 0           | 0 | 0.024154691  |
| 0 | 0            | 0 | 0.041853614  | 0 | 0            | 0 | 0           | 0 | 0            |
| 0 | -0.11204397  | 0 | 0            | 0 | -0.11900632  | 0 | 0.099294865 | 0 | 0.13434307   |
| 0 | -0.010297828 | 0 | -0.032909554 | 0 | 0.12762414   | 0 | 0           | 0 | 0            |
| 0 | -0.00431679  | 0 | 0.035800129  | 0 | 0            | 0 | 0           | 0 | 0            |
| 0 | 0            | 0 | -0.031845245 | 0 | 0.13350805   | 0 | 0           | 0 | 0            |
| 0 | 0            | 0 | -0.031532419 | 0 | 0.13310954   | 0 | 0           | 0 | -0.002022523 |
| 0 | -0.0209237   | 0 | 0.006741854  | 0 | 0            | 0 | 0           | 0 | 0            |
| 0 | -0.023077427 | 0 | 0            | 0 | 0            | 0 | 0           | 0 | 0            |
| 0 | -0.10985891  | 0 | 0            | 0 | -0.1190474   | 0 | 0.099518286 | 0 | 0            |
| 0 | 0            | 0 | 0            | 0 | 0            | 0 | 0           | 0 | 0.22775289   |
| 0 | -0.017671902 | 0 | 0            | 0 | 0            | 0 | 0           | 0 | 0            |
| 0 | -0.018534211 | 0 | 0            | 0 | -0.00355486  | 0 | 0           | 0 | 0            |
| 0 | -0.020203652 | 0 | 0.00759335   | 0 | 0            | 0 | 0           | 0 | 0            |
| 0 | -0.024147127 | 0 | 0            | 0 | 0.087035581  | 0 | 0           | 0 | 0.027207003  |
| 0 | 0            | 0 | 0            | 0 | 0.005526319  | 0 | 0           | 0 | 0.015838581  |
| 0 | 0            | 0 | 0            | 0 | 0            | 0 | 0           | 0 | 0.015256927  |
| 0 | 0            | 0 | 0            | 0 | 0.10440171   | 0 | 0           | 0 | 0.19186925   |
| 0 | 0            | 0 | 0            | 0 | 0.005370087  | 0 | 0           | 0 | 0            |
| 0 | -0.021302499 | 0 | 0            | 0 | 0.08914565   | 0 | 0           | 0 | 0            |
| 0 | 0            | 0 | 0            | 0 | 0            | 0 | 0           | 0 | 0            |
| 0 | 0            | 0 | 0.015345409  | 0 | 0            | 0 | 0           | 0 | 0.007729011  |
| 0 | 0            | 0 | 0.015179447  | 0 | 0            | 0 | 0           | 0 | 0            |
| 0 | 0            | 0 | 0            | 0 | 0            | 0 | 0           | 0 | 0.20711978   |
| 0 | 0            | 0 | 0.014514191  | 0 | 0            | 0 | 0           | 0 | 0            |
| 0 | 0            | 0 | 0            | 0 | 0.071943295  | 0 | 0           | 0 | 0.026472996  |
| 0 | -0.11099929  | 0 | 0            | 0 | -0.11935547  | 0 | 0.096459044 | 0 | 0.1333495    |

|   |              |   |             |   |              |   |             |   |             |
|---|--------------|---|-------------|---|--------------|---|-------------|---|-------------|
| 0 | 0            | 0 | 0           | 0 | 0.072024791  | 0 | 0           | 0 | 0           |
| 0 | 0            | 0 | 0           | 0 | 0.004508307  | 0 | 0           | 0 | 0           |
| 0 | -0.076305087 | 0 | 0           | 0 | 0            | 0 | 0           | 0 | 0.080386942 |
| 0 | 0            | 0 | 0           | 0 | 0            | 0 | 0           | 0 | 0.00537652  |
| 0 | 0            | 0 | 0           | 0 | 0            | 0 | 0           | 0 | 0           |
| 0 | 0            | 0 | 0           | 0 | 0            | 0 | 0           | 0 | 0.2273619   |
| 0 | 0            | 0 | 0.015865127 | 0 | 0            | 0 | 0           | 0 | 0.007891057 |
| 0 | 0            | 0 | 0.053525573 | 0 | 0            | 0 | 0           | 0 | 0.037408795 |
| 0 | 0            | 0 | 0.015699496 | 0 | 0            | 0 | 0           | 0 | 0           |
| 0 | 0            | 0 | 0           | 0 | 0.073045762  | 0 | 0           | 0 | 0.026454392 |
| 0 | -0.074324107 | 0 | 0           | 0 | 0            | 0 | 0           | 0 | 0           |
| 0 | 0            | 0 | 0           | 0 | 0            | 0 | 0           | 0 | 0.20629829  |
| 0 | -0.018294946 | 0 | 0           | 0 | -0.00444094  | 0 | 0           | 0 | 0           |
| 0 | -0.031838302 | 0 | 0.034615106 | 0 | 0            | 0 | 0           | 0 | 0.065107266 |
| 0 | 0            | 0 | 0           | 0 | 0.073124709  | 0 | 0           | 0 | 0           |
| 0 | -0.10879028  | 0 | 0           | 0 | -0.11940547  | 0 | 0.09668192  | 0 | 0           |
| 0 | 0            | 0 | 0.053203574 | 0 | 0            | 0 | 0           | 0 | 0           |
| 0 | 0.011441351  | 0 | 0           | 0 | 0.080737148  | 0 | 0           | 0 | 0           |
| 0 | 0            | 0 | 0.014675465 | 0 | 0.059879621  | 0 | 0           | 0 | 0           |
| 0 | 0            | 0 | 0           | 0 | 0.004526014  | 0 | 0           | 0 | 0.016368841 |
| 0 | -0.029144746 | 0 | 0.035268927 | 0 | 0            | 0 | 0           | 0 | 0           |
| 0 | 0            | 0 | 0           | 0 | 0.004365752  | 0 | 0           | 0 | 0           |
| 0 | 0            | 0 | 0           | 0 | 0.073832571  | 0 | 0           | 0 | 0           |
| 0 | 0            | 0 | 0.053916419 | 0 | 0            | 0 | 0           | 0 | 0.037421702 |
| 0 | 0            | 0 | 0.047015388 | 0 | 0            | 0 | 0           | 0 | 0.2595362   |
| 0 | 0            | 0 | 0.053591283 | 0 | 0            | 0 | 0           | 0 | 0           |
| 0 | 0.011776611  | 0 | 0           | 0 | 0.081929773  | 0 | 0           | 0 | 0           |
| 0 | 0            | 0 | 0.014707225 | 0 | 0.060833246  | 0 | 0           | 0 | 0           |
| 0 | -0.031803584 | 0 | 0.034732534 | 0 | 0            | 0 | 0           | 0 | 0.065218699 |
| 0 | 0            | 0 | 0.051932988 | 0 | -0.006845713 | 0 | 0           | 0 | 0.038307582 |
| 0 | 0            | 0 | 0.047033717 | 0 | 0            | 0 | 0           | 0 | 0.037540784 |
| 0 | -0.049103332 | 0 | 0           | 0 | 0            | 0 | 0           | 0 | 0.29556429  |
| 0 | -0.029092694 | 0 | 0.035372709 | 0 | 0            | 0 | 0           | 0 | 0           |
| 0 | 0            | 0 | 0.051395038 | 0 | -0.006569519 | 0 | 0           | 0 | 0           |
| 0 | 0            | 0 | 0.046696002 | 0 | 0            | 0 | 0           | 0 | 0           |
| 0 | 0            | 0 | 0.046920424 | 0 | 0            | 0 | 0           | 0 | 0.25857792  |
| 0 | -0.048515819 | 0 | 0           | 0 | 0            | 0 | 0           | 0 | 0.07410977  |
| 0 | -0.044138915 | 0 | 0           | 0 | 0.009689093  | 0 | 0           | 0 | 0.070671766 |
| 0 | -0.049376909 | 0 | 0           | 0 | 0            | 0 | 0           | 0 | 0.075556781 |
| 0 | -0.046094285 | 0 | 0           | 0 | 0            | 0 | 0           | 0 | 0           |
| 0 | 0            | 0 | 0.053365779 | 0 | -0.008982295 | 0 | 0           | 0 | 0.038609066 |
| 0 | -0.10439828  | 0 | 0           | 0 | -0.033288585 | 0 | 0.08192845  | 0 | 0.13389101  |
| 0 | 0.009844515  | 0 | 0.053084774 | 0 | 0            | 0 | 0           | 0 | 0           |
| 0 | -0.041349752 | 0 | 0           | 0 | 0.010466976  | 0 | 0           | 0 | 0           |
| 0 | -0.067397912 | 0 | 0.031241415 | 0 | 0            | 0 | 0.057612817 | 0 | 0.10403182  |
| 0 | -0.048946437 | 0 | 0           | 0 | 0            | 0 | 0           | 0 | 0.29444462  |
| 0 | 0            | 0 | 0.052830243 | 0 | -0.008711047 | 0 | 0           | 0 | 0           |

[illegible]

|   |              |   |              |   |              |   |             |             |
|---|--------------|---|--------------|---|--------------|---|-------------|-------------|
| 0 | -0.057907906 | 0 | 0.04042934   | 0 | 0            | 0 | 0           | 0           |
| 0 | 0            | 0 | 0            | 0 | 0            | 0 | 0           | 0           |
| 0 | 0            | 0 | 0.097418718  | 0 | -0.050610296 | 0 | 0.070619589 | 0.05373313  |
| 0 | -0.04980467  | 0 | 0            | 0 | 0            | 0 | 0           | 0.29091902  |
| 0 | 0.014136543  | 0 | 0.014416362  | 0 | 0.1037789    | 0 | 0           | 0           |
| 0 | 0.008586965  | 0 | 0            | 0 | 0.074314322  | 0 | 0           | 0           |
| 0 | 0            | 0 | 0.097150501  | 0 | -0.050621169 | 0 | 0.070925798 | 0           |
| 0 | -0.070339542 | 0 | 0.010771056  | 0 | 0            | 0 | 0           | 0           |
| 0 | -0.002399713 | 0 | 0            | 0 | 0.022054305  | 0 | 0           | 0           |
| 0 | -0.048683691 | 0 | 0.00199464   | 0 | 0            | 0 | 0           | 0.073404986 |
| 0 | -0.04962177  | 0 | 0            | 0 | 0            | 0 | 0           | 0.073984086 |
| 0 | -0.049177624 | 0 | 0            | 0 | 0            | 0 | 0           | 0.28918953  |
| 0 | -0.043732452 | 0 | 0.056355193  | 0 | 0            | 0 | 0           | 0.082633896 |
| 0 | -0.046026817 | 0 | 0.002523609  | 0 | 0            | 0 | 0           | 0           |
| 0 | -0.047177016 | 0 | 0            | 0 | 0            | 0 | 0           | 0           |
| 0 | -0.007731895 | 0 | 0            | 0 | 0            | 0 | 0           | 0           |
| 0 | -0.047633262 | 0 | 0.002874147  | 0 | 0            | 0 | 0           | 0.072493434 |
| 0 | -0.082531353 | 0 | 0            | 0 | 0            | 0 | 0           | 0.29631666  |
| 0 | 0            | 0 | 0.093896463  | 0 | -0.053413928 | 0 | 0.052926927 | 0           |
| 0 | 0            | 0 | 0.062502157  | 0 | 0            | 0 | 0.037936736 | 0.040768987 |
| 0 | -0.041103001 | 0 | 0.057250201  | 0 | 0            | 0 | 0           | 0           |
| 0 | 0            | 0 | 0.062231782  | 0 | 0            | 0 | 0.038029649 | 0           |
| 0 | -0.044958841 | 0 | 0.003397084  | 0 | 0            | 0 | 0           | 0           |
| 0 | -0.085197591 | 0 | 0            | 0 | -0.005259858 | 0 | 0           | 0.10137024  |
| 0 | 0            | 0 | 0.062875396  | 0 | 0            | 0 | 0.047762508 | 0.20401379  |
| 0 | -0.087995163 | 0 | -0.070611483 | 0 | 0            | 0 | 0.045530124 | 0.10041989  |
| 0 | -0.082609168 | 0 | 0            | 0 | -0.004465828 | 0 | 0           | 0           |
| 0 | -0.088114454 | 0 | 0            | 0 | -0.066853952 | 0 | 0           | 0.10127258  |
| 0 | 0            | 0 | 0.077315451  | 0 | 0            | 0 | 0           | 0.24679814  |
| 0 | -0.085714604 | 0 | -0.070680503 | 0 | 0            | 0 | 0.045696112 | 0           |
| 0 | 0            | 0 | 0.016119953  | 0 | 0            | 0 | 0           | 0.24378417  |
| 0 | 0            | 0 | 0.087135339  | 0 | -0.027673314 | 0 | 0           | 0.037767394 |
| 0 | -0.085428906 | 0 | 0            | 0 | -0.066655965 | 0 | 0           | 0           |
| 0 | -0.023647238 | 0 | -0.027729224 | 0 | 0.11146368   | 0 | 0           | 0.045009386 |
| 0 | 0            | 0 | -0.028253011 | 0 | 0.12897692   | 0 | 0           | 0.22058135  |
| 0 | 0            | 0 | 0.086795124  | 0 | -0.027596936 | 0 | 0           | 0           |
| 0 | -0.054467121 | 0 | 0.045497798  | 0 | 0            | 0 | 0           | 0.29984227  |
| 0 | -0.020402407 | 0 | -0.028201738 | 0 | 0.11427527   | 0 | 0           | 0           |
| 0 | 0            | 0 | 0.016501643  | 0 | 0            | 0 | 0           | 0.24290005  |
| 0 | 0            | 0 | 0.067154477  | 0 | 0            | 0 | 0           | 0.23369105  |
| 0 | 0            | 0 | 0.015904195  | 0 | 0            | 0 | 0           | 0.029777733 |
| 0 | 0            | 0 | 0            | 0 | 0            | 0 | 0           | 0.1855619   |
| 0 | 0            | 0 | 0            | 0 | 0            | 0 | 0           | 0.24052093  |
| 0 | 0            | 0 | 0.015709722  | 0 | 0            | 0 | 0           | 0           |
| 0 | -0.056184348 | 0 | 0.053447004  | 0 | -0.011951532 | 0 | 0           | 0.096126159 |
| 0 | -0.012089044 | 0 | 0.050842222  | 0 | 0            | 0 | 0.034167315 | 0           |
| 0 | -0.024862824 | 0 | 0            | 0 | 0.085427654  | 0 | 0           | 0.25195174  |



|   |              |   |              |   |              |             |             |             |
|---|--------------|---|--------------|---|--------------|-------------|-------------|-------------|
| 0 | -0.087941868 | 0 | 0            | 0 | -0.067936802 | 0           | 0           | 0.1015911   |
| 0 | -0.053454139 | 0 | 0.053746721  | 0 | -0.011257257 | 0           | 0           | 0           |
| 0 | -0.087369232 | 0 | -0.069860418 | 0 | 0            | 0.041756501 | 0           | 0.10009713  |
| 0 | -0.085230827 | 0 | 0            | 0 | -0.06774908  | 0           | 0           | 0           |
| 0 | -0.007870338 | 0 | 0.079225728  | 0 | -0.040349916 | 0           | 0.067218306 | 0           |
| 0 | -0.085043317 | 0 | -0.069929057 | 0 | 0            | 0.041914316 | 0           | 0           |
| 0 | -0.013384636 | 0 | 0.074551958  | 0 | -0.027525297 | 0           | 0           | 0           |
| 0 | -0.005360537 | 0 | 0.010784049  | 0 | 0            | 0           | 0           | 0           |
| 0 | -0.076210898 | 0 | 0            | 0 | 0            | 0           | 0           | 0.30426954  |
| 0 | -0.074357495 | 0 | 0            | 0 | -0.042779141 | 0           | 0           | 0.32074589  |
| 0 | -0.074882022 | 0 | -0.014737823 | 0 | -0.030267799 | 0           | 0           | 0.097409437 |
| 0 | -0.07968443  | 0 | -0.051979493 | 0 | 0            | 0           | 0           | 0.089756231 |
| 0 | -0.038075254 | 0 | 0            | 0 | -0.099556327 | 0           | 0.063838273 | 0           |
| 0 | -0.074212563 | 0 | 0            | 0 | -0.042914152 | 0           | 0           | 0.099331153 |
| 0 | -0.0351131   | 0 | -0.024236448 | 0 | -0.071632706 | 0           | 0.07239157  | 0           |
| 0 | -0.071306911 | 0 | 0            | 0 | 0.015075183  | 0           | 0           | 0.30474047  |
| 0 | -0.077179917 | 0 | -0.052002051 | 0 | 0            | 0           | 0           | 0           |
| 0 | -0.072221594 | 0 | -0.015142814 | 0 | -0.029733841 | 0           | 0           | 0           |
| 0 | -0.073014227 | 0 | -0.040577803 | 0 | 0            | 0           | 0           | 0.3129369   |
| 0 | -0.074606456 | 0 | 0            | 0 | -0.044657927 | 0           | 0           | 0.31981075  |
| 0 | 0            | 0 | 0.035162835  | 0 | 0            | 0           | 0           | 0.19357885  |
| 0 | -0.071482277 | 0 | 0            | 0 | -0.042738729 | 0           | 0           | 0           |
| 0 | -0.031846793 | 0 | 0            | 0 | -0.092706829 | 0           | 0.072344938 | 0           |
| 0 | -0.07516956  | 0 | -0.013696184 | 0 | -0.033037777 | 0           | 0           | 0.097890681 |
| 0 | -0.073235451 | 0 | -0.040634111 | 0 | 0            | 0           | 0           | 0.091704611 |
| 0 | 0            | 0 | 0.072684692  | 0 | -0.003910364 | 0           | 0           | 0.24985877  |
| 0 | -0.079564198 | 0 | -0.052301519 | 0 | 0            | 0           | 0           | 0.09037112  |
| 0 | -0.03702484  | 0 | 0            | 0 | -0.10012736  | 0           | 0.062115286 | 0           |
| 0 | -0.072485494 | 0 | -0.014085245 | 0 | -0.032530547 | 0           | 0           | 0           |
| 0 | -0.03425452  | 0 | -0.022330671 | 0 | -0.074279555 | 0           | 0.070062314 | 0           |
| 0 | -0.070615787 | 0 | -0.040586368 | 0 | 0            | 0           | 0           | 0           |
| 0 | -0.073445022 | 0 | -0.042020336 | 0 | 0            | 0           | 0           | 0.31190957  |
| 0 | 0            | 0 | 0            | 0 | -0.078816831 | 0           | 0.059294108 | 0.19465365  |
| 0 | 0            | 0 | 0            | 0 | -0.080991895 | 0           | 0.061306286 | 0.030018923 |
| 0 | -0.077026986 | 0 | -0.052324423 | 0 | 0            | 0           | 0           | 0           |
| 0 | 0            | 0 | -0.01070607  | 0 | -0.070467408 | 0           | 0.060356791 | 0.02837595  |
| 0 | -0.032350008 | 0 | 0            | 0 | -0.00227429  | 0           | 0.041907148 | 0           |
| 0 | 0            | 0 | 0            | 0 | -0.081183468 | 0           | 0.061525236 | 0           |
| 0 | 0            | 0 | -0.011003421 | 0 | -0.070385516 | 0           | 0.060555878 | 0           |
| 0 | 0            | 0 | 0            | 0 | -0.080753973 | 0           | 0.058879408 | 0.029189378 |
| 0 | 0            | 0 | 0            | 0 | -0.081009152 | 0           | 0.058962724 | 0           |
| 0 | 0            | 0 | 0            | 0 | 0.014990309  | 0           | 0.039340062 | 0.031805574 |
| 0 | 0            | 0 | 0            | 0 | 0.014841977  | 0           | 0.03942866  | 0           |
| 0 | 0            | 0 | 0            | 0 | 0            | 0           | 0.045324009 | 0.1749028   |
| 0 | 0            | 0 | -0.015844038 | 0 | -0.067465732 | 0           | 0.061087067 | 0           |
| 0 | 0            | 0 | 0            | 0 | -0.080325068 | 0           | 0.057504907 | 0.19484227  |
| 0 | 0            | 0 | -0.015821687 | 0 | -0.068707902 | 0           | 0.056127177 | 0           |

|   |              |   |              |   |              |   |              |   |             |
|---|--------------|---|--------------|---|--------------|---|--------------|---|-------------|
| 0 | 0            | 0 | 0            | 0 | -0.083886864 | 0 | 0.056961624  | 0 | 0           |
| 0 | 0            | 0 | -0.008900935 | 0 | -0.073518668 | 0 | 0.058545376  | 0 | 0.028528978 |
| 0 | 0            | 0 | 0            | 0 | -0.081952148 | 0 | 0.057626702  | 0 | 0.029367989 |
| 0 | 0            | 0 | -0.009193438 | 0 | -0.073443431 | 0 | 0.058745436  | 0 | 0           |
| 0 | -0.071445786 | 0 | 0.011789949  | 0 | 0            | 0 | 0            | 0 | 0.29860625  |
| 0 | 0            | 0 | 0            | 0 | 0.018865469  | 0 | 0.046284818  | 0 | 0.18662707  |
| 0 | 0            | 0 | 0            | 0 | -0.082211723 | 0 | 0.057712287  | 0 | 0           |
| 0 | -0.033720399 | 0 | -0.022345051 | 0 | -0.041737143 | 0 | 0            | 0 | 0           |
| 0 | 0            | 0 | -0.014096569 | 0 | -0.071422404 | 0 | 0.054776636  | 0 | 0           |
| 0 | -0.033103862 | 0 | -0.065233139 | 0 | 0            | 0 | 0.032769742  | 0 | 0           |
| 0 | 0            | 0 | 0            | 0 | 0.029286445  | 0 | 0            | 0 | 0.21763856  |
| 0 | -0.030631109 | 0 | -0.063477977 | 0 | 0            | 0 | 0.037826122  | 0 | 0           |
| 0 | -0.030843565 | 0 | 0            | 0 | -0.060968428 | 0 | 0            | 0 | 0           |
| 0 | -0.032943114 | 0 | -0.020884529 | 0 | -0.044296063 | 0 | 0            | 0 | 0           |
| 0 | 0            | 0 | 0            | 0 | -0.047398469 | 0 | 0            | 0 | 0.23999747  |
| 0 | 0            | 0 | -0.050642945 | 0 | 0            | 0 | 0.027091512  | 0 | 0.21633281  |
| 0 | 0            | 0 | -0.011354889 | 0 | -0.037759765 | 0 | 0            | 0 | 0.022594191 |
| 0 | -0.03067812  | 0 | -0.05113496  | 0 | 0            | 0 | 0            | 0 | 0           |
| 0 | 0            | 0 | -0.050659163 | 0 | 0            | 0 | 0.030716251  | 0 | 0.023234866 |
| 0 | 0            | 0 | -0.051497    | 0 | 0            | 0 | 0.028030301  | 0 | 0.021677586 |
| 0 | 0            | 0 | 0            | 0 | -0.048049951 | 0 | 0            | 0 | 0.024371254 |
| 0 | -0.031989112 | 0 | -0.064330922 | 0 | 0            | 0 | 0.029852705  | 0 | 0           |
| 0 | 0            | 0 | -0.0117173   | 0 | -0.037688625 | 0 | 0            | 0 | 0           |
| 0 | 0            | 0 | -0.050956817 | 0 | 0            | 0 | 0.030750348  | 0 | 0           |
| 0 | 0            | 0 | -0.051743054 | 0 | 0            | 0 | 0.028247409  | 0 | 0           |
| 0 | 0            | 0 | 0            | 0 | -0.048299152 | 0 | 0            | 0 | 0           |
| 0 | 0            | 0 | -0.011646802 | 0 | -0.025510543 | 0 | 0            | 0 | 0.24600478  |
| 0 | 0            | 0 | 0            | 0 | -0.035940207 | 0 | 0            | 0 | 0.24847111  |
| 0 | 0            | 0 | -0.015220331 | 0 | -0.037508982 | 0 | 0            | 0 | 0           |
| 0 | 0            | 0 | 0            | 0 | -0.048969694 | 0 | 0            | 0 | 0.23930561  |
| 0 | 0            | 0 | -0.053902653 | 0 | 0            | 0 | 0.029490749  | 0 | 0           |
| 0 | 0            | 0 | -0.011364819 | 0 | -0.026247845 | 0 | 0            | 0 | 0.028237193 |
| 0 | -0.021266893 | 0 | -0.021996418 | 0 | -0.019561562 | 0 | 0            | 0 | 0           |
| 0 | 0            | 0 | -0.011748207 | 0 | -0.025951174 | 0 | 0            | 0 | 0           |
| 0 | 0            | 0 | -0.038229508 | 0 | 0            | 0 | 0            | 0 | 0.2387272   |
| 0 | 0            | 0 | -0.009859641 | 0 | -0.040610268 | 0 | 0            | 0 | 0.023162424 |
| 0 | 0            | 0 | -0.033836868 | 0 | 0            | 0 | 0            | 0 | 0.24310791  |
| 0 | 0            | 0 | -0.010218342 | 0 | -0.040545205 | 0 | 0            | 0 | 0           |
| 0 | 0            | 0 | -0.050351158 | 0 | 0            | 0 | 0.023677499  | 0 | 0.2180685   |
| 0 | 0            | 0 | -0.010192335 | 0 | -0.029052407 | 0 | 0            | 0 | 0.24507772  |
| 0 | 0            | 0 | -0.038501292 | 0 | 0            | 0 | 0            | 0 | 0.021265202 |
| 0 | 0            | 0 | -0.050183736 | 0 | 0            | 0 | 0.028129854  | 0 | 0.023681218 |
| 0 | 0            | 0 | -0.038813539 | 0 | 0            | 0 | 0            | 0 | 0           |
| 0 | 0            | 0 | -0.050484565 | 0 | 0            | 0 | 0.028163697  | 0 | 0           |
| 0 | -0.056624639 | 0 | 0            | 0 | 0            | 0 | 0            | 0 | 0.31817121  |
| 0 | -0.05731348  | 0 | 0            | 0 | 0            | 0 | -0.010451742 | 0 | 0.32285426  |
| 0 | 0            | 0 | -0.038742457 | 0 | 0            | 0 | 0            | 0 | 0.23836666  |

|   |              |   |              |   |              |              |             |             |
|---|--------------|---|--------------|---|--------------|--------------|-------------|-------------|
| 0 | -0.057035886 | 0 | 0            | 0 | 0            | 0            | 0           | 0.088285259 |
| 0 | -0.056481159 | 0 | 0            | 0 | 0            | -0.001929673 | 0           | 0.087338494 |
| 0 | -0.058974249 | 0 | 0            | 0 | 0            | 0            | 0           | 0.31703911  |
| 0 | -0.057840849 | 0 | 0            | 0 | 0            | -0.009822367 | 0           | 0.085376714 |
| 0 | -0.054408157 | 0 | 0            | 0 | 0            | 0            | 0           | 0           |
| 0 | -0.053890489 | 0 | 0            | 0 | 0            | -0.001966555 | 0           | 0           |
| 0 | -0.055167549 | 0 | 0            | 0 | 0            | -0.009764255 | 0           | 0           |
| 0 | -0.056321585 | 0 | 0            | 0 | 0            | 0            | 0           | 0.31761751  |
| 0 | -0.057151512 | 0 | 0            | 0 | 0            | -0.013397272 | 0           | 0.32383989  |
| 0 | -0.056189777 | 0 | 0            | 0 | 0            | -0.004176735 | 0           | 0.087462319 |
| 0 | -0.053553538 | 0 | 0            | 0 | 0            | -0.004211879 | 0           | 0           |
| 0 | 0            | 0 | 0            | 0 | 0            | -0.002974294 | 0           | 0.26379038  |
| 0 | 0            | 0 | 0            | 0 | 0            | 0            | 0           | 0.26228624  |
| 0 | 0            | 0 | 0            | 0 | 0            | -0.012194624 | 0           | 0.26687     |
| 0 | -0.14562242  | 0 | -0.020970374 | 0 | -0.070516039 | 0            | 0.040622748 | 0.17099853  |
| 0 | 0            | 0 | 0            | 0 | 0            | -0.002059629 | 0           | 0.035198317 |
| 0 | 0            | 0 | 0            | 0 | 0            | -0.002226828 | 0           | 0           |
| 0 | -0.14786336  | 0 | 0            | 0 | -0.092309722 | 0            | 0.035253482 | 0.1732738   |
| 0 | -0.144471    | 0 | 0            | 0 | -0.087221944 | 0            | 0.038997284 | 0.33232786  |
| 0 | 0            | 0 | 0            | 0 | 0            | -0.00513746  | 0           | 0.26483122  |
| 0 | -0.14323109  | 0 | -0.021457037 | 0 | -0.069957666 | 0            | 0.040497554 | 0           |
| 0 | -0.14538578  | 0 | 0            | 0 | -0.092121694 | 0            | 0.035146139 | 0           |
| 0 | -0.13260299  | 0 | -0.020297056 | 0 | -0.052362845 | 0            | 0           | 0.15182521  |
| 0 | -0.13231657  | 0 | 0            | 0 | -0.069631343 | 0            | 0           | 0.34868473  |
| 0 | -0.009915254 | 0 | 0            | 0 | 0            | -0.008601375 | 0           | 0           |
| 0 | -0.12263001  | 0 | -0.020082633 | 0 | -0.038049093 | 0            | 0           | 0.34524407  |
| 0 | -0.13012603  | 0 | -0.020806639 | 0 | -0.051778028 | 0            | 0           | 0           |
| 0 | -0.12548827  | 0 | -0.058395247 | 0 | 0            | 0.007541384  | 0           | 0.33505727  |
| 0 | -0.12382156  | 0 | -0.056164415 | 0 | 0            | 0            | 0           | 0.33860844  |
| 0 | -0.12608473  | 0 | -0.059521072 | 0 | 0            | 0.00720784   | 0           | 0.14518862  |
| 0 | -0.12376465  | 0 | -0.059606622 | 0 | 0            | 0.0071693    | 0           | 0           |
| 0 | 0            | 0 | 0            | 0 | 0.063064145  | 0            | 0.19379731  | 0           |
| 0 | 0            | 0 | 0.043557432  | 0 | 0            | 0            | 0.19383579  | 0           |
| 0 | 0            | 0 | 0            | 0 | 0.06457029   | 0            | 0.19258056  | 0           |
| 0 | 0            | 0 | 0.044161077  | 0 | 0            | 0            | 0.19269117  | 0           |
| 0 | -0.020080512 | 0 | 0            | 0 | 0            | 0            | 0.19768109  | 0           |
| 0 | 0            | 0 | 0            | 0 | 0            | 0            | 0.19842014  | 0.002309142 |
| 0 | 0            | 0 | 0            | 0 | 0            | 0            | 0.19845133  | 0           |
| 0 | 0            | 0 | 0            | 0 | 0            | 0            | 0.19848583  | 0           |
| 0 | -0.01964133  | 0 | 0            | 0 | 0            | 0            | 0.19657325  | 0           |
| 0 | 0            | 0 | 0            | 0 | 0            | 0            | 0.19733219  | 0.00246221  |
| 0 | 0            | 0 | 0            | 0 | 0            | 0            | 0.19736547  | 0           |
| 0 | 0            | 0 | -0.034209042 | 0 | 0.090259763  | 0            | 0.19268986  | 0           |
| 0 | -0.09605739  | 0 | 0            | 0 | 0            | -0.029927335 | 0           | 0.36212369  |
| 0 | 0            | 0 | -0.033587808 | 0 | 0.090821901  | 0            | 0.19160123  | 0           |
| 0 | -0.00787758  | 0 | 0            | 0 | 0.052534008  | 0            | 0.19036379  | 0           |
| 0 | 0            | 0 | 0            | 0 | 0.057744638  | 0            | 0.19025254  | 0           |

|   |              |   |              |   |             |   |            |   |             |
|---|--------------|---|--------------|---|-------------|---|------------|---|-------------|
| 0 | 0            | 0 | 0            | 0 | 0.057581521 | 0 | 0.19027338 | 0 | 0.000162473 |
| 0 | 0            | 0 | 0            | 0 | 0.057593534 | 0 | 0.1902773  | 0 | 0           |
| 0 | 0            | 0 | 0            | 0 | 0.059518887 | 0 | 0.20203169 | 0 | 0.019785472 |
| 0 | 0            | 0 | 0            | 0 | 0.059516207 | 0 | 0.20229684 | 0 | 0           |
| 0 | -0.007218908 | 0 | 0            | 0 | 0.053858216 | 0 | 0.1893757  | 0 | 0           |
| 0 | 0.007765867  | 0 | 0            | 0 | 0.065526292 | 0 | 0.20287486 | 0 | 0           |
| 0 | -0.043325429 | 0 | 0            | 0 | 0           | 0 | 0.19195384 | 0 | 0.042820075 |
| 0 | 0            | 0 | 0            | 0 | 0.05842007  | 0 | 0.18930915 | 0 | 0.000281906 |
| 0 | 0            | 0 | 0            | 0 | 0.058431753 | 0 | 0.18931457 | 0 | 0           |
| 0 | -0.042710689 | 0 | 0            | 0 | 0           | 0 | 0.19252948 | 0 | 0           |
| 0 | 0            | 0 | 0.008102794  | 0 | 0.053061828 | 0 | 0.20297085 | 0 | 0           |
| 0 | 0            | 0 | 0            | 0 | 0.060724873 | 0 | 0.20318986 | 0 | 0           |
| 0 | 0            | 0 | 0.041868361  | 0 | 0           | 0 | 0.20174145 | 0 | 0.028457788 |
| 0 | 0            | 0 | 0.041760594  | 0 | 0           | 0 | 0.20213277 | 0 | 0           |
| 0 | 0            | 0 | 0            | 0 | 0.060524786 | 0 | 0.20088104 | 0 | 0.019754504 |
| 0 | 0            | 0 | 0            | 0 | 0.060521298 | 0 | 0.2011482  | 0 | 0           |
| 0 | 0            | 0 | 0.011108266  | 0 | 0.099331935 | 0 | 0.1773036  | 0 | 0           |
| 0 | -0.004978901 | 0 | 0            | 0 | 0.10589287  | 0 | 0.17787593 | 0 | 0           |
| 0 | 0            | 0 | 0            | 0 | 0.10894781  | 0 | 0.17781601 | 0 | 0.001927288 |
| 0 | 0            | 0 | 0            | 0 | 0.10895881  | 0 | 0.17783934 | 0 | 0           |
| 0 | -0.040555737 | 0 | 0            | 0 | 0           | 0 | 0.20364412 | 0 | 0.059531603 |
| 0 | 0.008262152  | 0 | 0            | 0 | 0.066766092 | 0 | 0.20172971 | 0 | 0           |
| 0 | -0.039777181 | 0 | 0            | 0 | 0           | 0 | 0.20446519 | 0 | 0           |
| 0 | 0            | 0 | 0.00828272   | 0 | 0.053819701 | 0 | 0.20182862 | 0 | 0           |
| 0 | -0.042612019 | 0 | 0            | 0 | 0           | 0 | 0.19103286 | 0 | 0.042307634 |
| 0 | -0.04199682  | 0 | 0            | 0 | 0           | 0 | 0.19160348 | 0 | 0           |
| 0 | 0            | 0 | 0.042307992  | 0 | 0           | 0 | 0.2006252  | 0 | 0.028470259 |
| 0 | 0            | 0 | 0.04219945   | 0 | 0           | 0 | 0.20101682 | 0 | 0           |
| 0 | -0.022300207 | 0 | -0.004524904 | 0 | 0           | 0 | 0.19452369 | 0 | 0           |
| 0 | -0.020652971 | 0 | 0            | 0 | 0           | 0 | 0.19396473 | 0 | 0           |
| 0 | 0.00557515   | 0 | 0.040376536  | 0 | 0           | 0 | 0.20369667 | 0 | 0           |
| 0 | 0            | 0 | 0.037172482  | 0 | 0           | 0 | 0.20399112 | 0 | 0           |
| 0 | -0.039923686 | 0 | 0            | 0 | 0           | 0 | 0.2025325  | 0 | 0.058896777 |
| 0 | -0.03914638  | 0 | 0            | 0 | 0           | 0 | 0.20334427 | 0 | 0           |
| 0 | -0.021326612 | 0 | -0.003430627 | 0 | 0           | 0 | 0.19348381 | 0 | 0           |
| 0 | 0.006204053  | 0 | 0.041073004  | 0 | 0           | 0 | 0.20257031 | 0 | 0           |
| 0 | 0            | 0 | 0.003745836  | 0 | 0           | 0 | 0.19424737 | 0 | 0           |
| 0 | 0            | 0 | 0.004180607  | 0 | 0           | 0 | 0.19404906 | 0 | 0.003025416 |
| 0 | 0            | 0 | 0.004157118  | 0 | 0           | 0 | 0.19409307 | 0 | 0           |
| 0 | 0            | 0 | 0            | 0 | 0           | 0 | 0.1947307  | 0 | 0.002338427 |
| 0 | 0            | 0 | 0            | 0 | 0           | 0 | 0.1947626  | 0 | 0           |
| 0 | 0            | 0 | 0            | 0 | 0           | 0 | 0.19439114 | 0 | 0.024635753 |
| 0 | 0            | 0 | 0            | 0 | 0           | 0 | 0.20617573 | 0 | 0.021414559 |
| 0 | 0            | 0 | 0            | 0 | 0           | 0 | 0.20646095 | 0 | 0           |
| 0 | 0            | 0 | 0            | 0 | 0           | 0 | 0.20586277 | 0 | 0.044807817 |
| 0 | 0            | 0 | 0.004842128  | 0 | 0           | 0 | 0.19309061 | 0 | 0.00323086  |
| 0 | 0            | 0 | 0.004818324  | 0 | 0           | 0 | 0.1931373  | 0 | 0           |

|   |              |   |              |   |              |   |   |              |   |              |
|---|--------------|---|--------------|---|--------------|---|---|--------------|---|--------------|
| 0 | 0            | 0 | 0            | 0 | 0            | 0 | 0 | 0.19352811   | 0 | 0.024478769  |
| 0 | -0.007741267 | 0 | 0            | 0 | 0            | 0 | 0 | 0.2075095    | 0 | 0            |
| 0 | 0            | 0 | -0.033153954 | 0 | 0.086659233  | 0 | 0 | 0.20079659   | 0 | 0.012626497  |
| 0 | 0            | 0 | -0.033227512 | 0 | 0.086731362  | 0 | 0 | 0.20097522   | 0 | 0            |
| 0 | 0            | 0 | 0            | 0 | 0            | 0 | 0 | 0.20477489   | 0 | 0.044387212  |
| 0 | 0.000784596  | 0 | -0.035710001 | 0 | 0.09021199   | 0 | 0 | 0.201705     | 0 | 0            |
| 0 | 0            | 0 | -0.035870881 | 0 | 0.089887806  | 0 | 0 | 0.20175665   | 0 | 0            |
| 0 | 0            | 0 | -0.032389968 | 0 | 0.086655805  | 0 | 0 | 0.19974504   | 0 | 0.012724108  |
| 0 | 0            | 0 | -0.032463504 | 0 | 0.086727806  | 0 | 0 | 0.1999248    | 0 | 0            |
| 0 | -0.021054158 | 0 | 0            | 0 | 0.040037894  | 0 | 0 | 0.19797889   | 0 | 0.038847425  |
| 0 | 0.0014144    | 0 | -0.034843956 | 0 | 0.090509087  | 0 | 0 | 0.20062371   | 0 | 0            |
| 0 | -0.020119493 | 0 | 0            | 0 | 0.040676724  | 0 | 0 | 0.19849197   | 0 | 0            |
| 0 | 0            | 0 | 0            | 0 | 0.054720871  | 0 | 0 | 0.19781661   | 0 | 0.047766216  |
| 0 | 0            | 0 | 0            | 0 | 0.054467807  | 0 | 0 | 0.19821375   | 0 | 0.01863004   |
| 0 | 0            | 0 | 0            | 0 | 0.05446639   | 0 | 0 | 0.19846645   | 0 | 0            |
| 0 | -0.019461684 | 0 | 0            | 0 | 0.04174803   | 0 | 0 | 0.19702896   | 0 | 0.037266836  |
| 0 | -0.018553044 | 0 | 0            | 0 | 0.04236075   | 0 | 0 | 0.19752415   | 0 | 0            |
| 0 | -0.046415523 | 0 | -0.009077079 | 0 | 0            | 0 | 0 | 0.20071301   | 0 | 0.062448962  |
| 0 | 0.004687946  | 0 | 0            | 0 | 0.058335273  | 0 | 0 | 0.19913329   | 0 | 0            |
| 0 | -0.045553962 | 0 | -0.008962419 | 0 | 0            | 0 | 0 | 0.20155712   | 0 | 0            |
| 0 | -0.042054646 | 0 | 0            | 0 | 0            | 0 | 0 | 0.19924123   | 0 | 0.090001149  |
| 0 | -0.041739338 | 0 | 0            | 0 | 0            | 0 | 0 | 0.19965865   | 0 | 0.059409179  |
| 0 | -0.012434866 | 0 | -0.043366068 | 0 | 0.13719076   | 0 | 0 | 0.17711127   | 0 | 0            |
| 0 | 0            | 0 | 0.075936878  | 0 | 0            | 0 | 0 | 0.17318277   | 0 | 0.01907465   |
| 0 | 0            | 0 | 0.075874244  | 0 | 0            | 0 | 0 | 0.17342896   | 0 | 0            |
| 0 | -0.040938608 | 0 | 0            | 0 | 0            | 0 | 0 | 0.20047874   | 0 | 0            |
| 0 | 0            | 0 | 0            | 0 | 0.055164171  | 0 | 0 | 0.19690233   | 0 | 0.047430635  |
| 0 | -0.012522583 | 0 | 0.066872404  | 0 | 0            | 0 | 0 | 0.17399104   | 0 | 0            |
| 0 | 0            | 0 | -0.042396605 | 0 | 0.14470415   | 0 | 0 | 0.17690712   | 0 | 0            |
| 0 | 0            | 0 | -0.04238536  | 0 | 0.14468343   | 0 | 0 | 0.17698122   | 0 | -0.005839448 |
| 0 | -0.044886643 | 0 | -0.007894903 | 0 | 0            | 0 | 0 | 0.19964911   | 0 | 0.061125853  |
| 0 | -0.044028851 | 0 | -0.007782832 | 0 | 0            | 0 | 0 | 0.20047863   | 0 | 0            |
| 0 | -0.041098373 | 0 | 0            | 0 | 0            | 0 | 0 | 0.19834463   | 0 | 0.088578352  |
| 0 | -0.051934416 | 0 | -0.035079496 | 0 | -0.022262897 | 0 | 0 | -0.013547085 | 0 | 0            |
| 0 | -0.076909436 | 0 | 0            | 0 | 0            | 0 | 0 | 0.17626857   | 0 | 0.079308621  |
| 0 | -0.076118666 | 0 | 0            | 0 | 0            | 0 | 0 | 0.17726779   | 0 | 0            |
| 0 | -0.023807731 | 0 | 0            | 0 | 0.088855558  | 0 | 0 | 0.17301644   | 0 | 0.025197743  |
| 0 | -0.023143362 | 0 | 0            | 0 | 0.089325863  | 0 | 0 | 0.17333284   | 0 | 0            |
| 0 | 0            | 0 | 0.004109894  | 0 | 0            | 0 | 0 | 0.20160852   | 0 | 0.020780306  |
| 0 | 0            | 0 | 0.004051399  | 0 | 0            | 0 | 0 | 0.20189604   | 0 | 0            |
| 0 | 0            | 0 | 0            | 0 | 0            | 0 | 0 | 0.20191175   | 0 | 0.044872493  |
| 0 | 0            | 0 | 0.004337869  | 0 | 0            | 0 | 0 | 0.20119746   | 0 | 0.046418337  |
| 0 | -0.017319335 | 0 | 0            | 0 | 0.095205779  | 0 | 0 | 0.18557507   | 0 | 0.039697791  |
| 0 | -0.01644981  | 0 | 0            | 0 | 0.095793312  | 0 | 0 | 0.18609523   | 0 | 0            |
| 0 | 0            | 0 | 0            | 0 | 0.1057661    | 0 | 0 | 0.17283315   | 0 | 0.02499894   |
| 0 | -0.009523331 | 0 | -0.001781105 | 0 | 0            | 0 | 0 | 0.20377409   | 0 | 0            |
| 0 | 0            | 0 | 0.010206407  | 0 | 0.098410339  | 0 | 0 | 0.18521734   | 0 | 0.02512071   |

|   |              |   |              |   |              |   |              |   |             |
|---|--------------|---|--------------|---|--------------|---|--------------|---|-------------|
| 0 | 0            | 0 | 0.010020695  | 0 | 0.098573052  | 0 | 0.18556041   | 0 | 0           |
| 0 | 0            | 0 | 0            | 0 | 0.10754589   | 0 | 0.18542447   | 0 | 0.047091478 |
| 0 | 0            | 0 | 0.004886974  | 0 | 0            | 0 | 0.20024315   | 0 | 0.046220447 |
| 0 | 0.009662493  | 0 | 0.004525089  | 0 | 0.11143886   | 0 | 0.18634171   | 0 | 0           |
| 0 | 0            | 0 | -0.023507819 | 0 | 0            | 0 | -0.026298076 | 0 | 0.24638874  |
| 0 | 0            | 0 | -0.01700971  | 0 | -0.012465725 | 0 | -0.026763948 | 0 | 0.24351713  |
| 0 | 0            | 0 | 0            | 0 | -0.025431008 | 0 | -0.023114875 | 0 | 0.24693707  |
| 0 | 0            | 0 | -0.017105421 | 0 | -0.011704184 | 0 | -0.021526337 | 0 | 0.040646082 |
| 0 | 0            | 0 | -0.01747002  | 0 | -0.011628742 | 0 | -0.021540143 | 0 | 0           |
| 0 | 0            | 0 | -0.017236035 | 0 | -0.022825622 | 0 | 0            | 0 | 0.224229    |
| 0 | -0.047094042 | 0 | 0.051645205  | 0 | 0            | 0 | 0.18217694   | 0 | 0.079957182 |
| 0 | -0.046079323 | 0 | 0.051917429  | 0 | 0            | 0 | 0.18320214   | 0 | 0           |
| 0 | -0.022860778 | 0 | -0.039578621 | 0 | 0.12476499   | 0 | 0.18445804   | 0 | 0.036649903 |
| 0 | -0.022065813 | 0 | -0.039726007 | 0 | 0.12545176   | 0 | 0.18495098   | 0 | 0           |
| 0 | 0            | 0 | -0.040091188 | 0 | 0.14147575   | 0 | 0.18435257   | 0 | 0.034867272 |
| 0 | -0.076907607 | 0 | 0.003797126  | 0 | 0            | 0 | 0.17174912   | 0 | 0.08000506  |
| 0 | -0.079030357 | 0 | 0            | 0 | 0            | 0 | 0.17177834   | 0 | 0.10344748  |
| 0 | -0.076013341 | 0 | 0.003949991  | 0 | 0            | 0 | 0.17274068   | 0 | 0           |
| 0 | 0            | 0 | 0.074038127  | 0 | 0            | 0 | 0.18090486   | 0 | 0.066260487 |
| 0 | -0.024287599 | 0 | 0            | 0 | 0.087448189  | 0 | 0.18037026   | 0 | 0.072021019 |
| 0 | -0.076662058 | 0 | 0            | 0 | 0            | 0 | 0.18375781   | 0 | 0.12246129  |
| 0 | 0            | 0 | 0            | 0 | 0            | 0 | 0.17589738   | 0 | 0.015861221 |
| 0 | 0            | 0 | 0.083305295  | 0 | -0.096988605 | 0 | 0.10855137   | 0 | 0           |
| 0 | -0.08136005  | 0 | 0            | 0 | -0.068409711 | 0 | 0.1277636    | 0 | 0.10478775  |
| 0 | 0            | 0 | 0.084048731  | 0 | -0.090044387 | 0 | 0.12365947   | 0 | 0.043181606 |
| 0 | -0.079416827 | 0 | 0            | 0 | -0.068086406 | 0 | 0.12811601   | 0 | 0           |
| 0 | 0            | 0 | 0.083799195  | 0 | -0.090093935 | 0 | 0.12397031   | 0 | 0           |
| 0 | 0            | 0 | 0.084310324  | 0 | -0.098267332 | 0 | 0.10623829   | 0 | 0           |
| 0 | -0.080945234 | 0 | 0            | 0 | -0.068498478 | 0 | 0.12449447   | 0 | 0.10449963  |
| 0 | 0            | 0 | 0.085352994  | 0 | -0.091808452 | 0 | 0.12125278   | 0 | 0.043414249 |
| 0 | 0            | 0 | 0.085101352  | 0 | -0.09186251  | 0 | 0.121563     | 0 | 0           |
| 0 | -0.078978506 | 0 | 0            | 0 | -0.068183931 | 0 | 0.12484376   | 0 | 0           |
| 0 | -0.075970478 | 0 | 0.004778671  | 0 | 0            | 0 | 0.17895238   | 0 | 0.12347734  |
| 0 | -0.003796677 | 0 | 0.070346136  | 0 | -0.082734447 | 0 | 0.12207731   | 0 | 0           |
| 0 | 0            | 0 | 0.072201291  | 0 | -0.082747526 | 0 | 0.12156833   | 0 | 0           |
| 0 | 0            | 0 | 0.030203298  | 0 | 0            | 0 | 0.16905816   | 0 | 0.028775097 |
| 0 | -0.048773525 | 0 | 0            | 0 | 0            | 0 | 0.074673437  | 0 | 0.068522952 |
| 0 | -0.003152472 | 0 | 0.071917979  | 0 | -0.084485292 | 0 | 0.11953255   | 0 | 0           |
| 0 | -0.026628986 | 0 | 0            | 0 | -0.05160533  | 0 | 0.099550224  | 0 | 0           |
| 0 | -0.04692274  | 0 | 0            | 0 | 0            | 0 | 0.074939141  | 0 | 0           |
| 0 | -0.047962662 | 0 | 0            | 0 | 0            | 0 | 0.084357555  | 0 | 0.2234302   |
| 0 | -0.042670342 | 0 | 0.01053986   | 0 | 0            | 0 | 0.082878664  | 0 | 0.070962278 |
| 0 | -0.048857076 | 0 | 0            | 0 | 0            | 0 | 0.085490647  | 0 | 0.075049391 |
| 0 | -0.040623259 | 0 | 0.0109485    | 0 | 0            | 0 | 0.083167188  | 0 | 0           |
| 0 | 0            | 0 | 0            | 0 | -0.037493979 | 0 | 0.096977127  | 0 | 0.021618227 |
| 0 | -0.046975398 | 0 | 0            | 0 | 0            | 0 | 0.085880316  | 0 | 0           |
| 0 | 0            | 0 | 0            | 0 | -0.037646632 | 0 | 0.097068002  | 0 | 0           |

|   |              |   |             |   |              |             |             |             |
|---|--------------|---|-------------|---|--------------|-------------|-------------|-------------|
| 0 | 0            | 0 | 0.025541696 | 0 | 0.052454831  | 0           | 0           | 0           |
| 0 | -0.049089679 | 0 | 0           | 0 | 0            | 0.07194416  | 0           | 0.069321919 |
| 0 | 0            | 0 | 0           | 0 | -0.03864968  | 0           | 0.095356881 | 0           |
| 0 | 0            | 0 | 0           | 0 | 0.07688234   | 0           | 0           | 0           |
| 0 | -0.004463052 | 0 | 0           | 0 | 0.072803109  | 0           | 0           | 0           |
| 0 | 0            | 0 | 0           | 0 | 0.075545927  | 0           | 0           | 0.002398235 |
| 0 | 0            | 0 | 0           | 0 | 0.075640988  | 0           | 0           | 0           |
| 0 | 0            | 0 | 0.027880363 | 0 | 0            | 0.069611871 | 0           | 0.02812125  |
| 0 | 0            | 0 | 0.027592468 | 0 | 0            | 0.069688735 | 0           | 0           |
| 0 | 0            | 0 | 0.025329585 | 0 | 0.054293029  | 0           | 0           | 0           |
| 0 | -0.025967579 | 0 | 0           | 0 | -0.051682436 | 0           | 0.096732053 | 0           |
| 0 | -0.047201403 | 0 | 0           | 0 | 0            | 0.072209889 | 0           | 0           |
| 0 | 0            | 0 | 0           | 0 | -0.032409358 | 0           | 0.10532089  | 0.1534973   |
| 0 | 0            | 0 | 0           | 0 | -0.033291225 | 0           | 0.106448    | 0.028974821 |
| 0 | -0.048167349 | 0 | 0           | 0 | 0            | 0.081209633 | 0           | 0.22487632  |
| 0 | 0            | 0 | 0           | 0 | -0.033446968 | 0           | 0.10669653  | 0           |
| 0 | 0            | 0 | 0.056437825 | 0 | 0            | 0           | 0           | 0.013941033 |
| 0 | -0.042335935 | 0 | 0.011746844 | 0 | 0            | 0.079516787 | 0           | 0.071060755 |
| 0 | 0            | 0 | 0.028084553 | 0 | 0            | 0.078633375 | 0           | 0.18795634  |
| 0 | -0.004064364 | 0 | 0           | 0 | 0.074783065  | 0           | 0           | 0           |
| 0 | 0            | 0 | 0.056189111 | 0 | 0            | 0           | 0           | 0           |
| 0 | 0            | 0 | 0           | 0 | 0.077233141  | 0           | 0           | 0.002519881 |
| 0 | 0            | 0 | 0           | 0 | 0.077327134  | 0           | 0           | 0           |
| 0 | -0.005075329 | 0 | 0.051848958 | 0 | 0            | 0           | 0           | 0           |
| 0 | 0            | 0 | 0.028120541 | 0 | 0            | 0.079652329 | 0           | 0.034206106 |
| 0 | 0            | 0 | 0.054822353 | 0 | 0            | 0           | 0           | 0           |
| 0 | -0.040255275 | 0 | 0.012152756 | 0 | 0            | 0.079798622 | 0           | 0           |
| 0 | 0            | 0 | 0.027822944 | 0 | 0            | 0.079891346 | 0           | 0           |
| 0 | 0            | 0 | 0           | 0 | -0.038000861 | 0           | 0.094427164 | 0.022045275 |
| 0 | 0            | 0 | 0           | 0 | 0            | 0.074876957 | 0           | 0.17525561  |
| 0 | 0            | 0 | 0           | 0 | -0.038159204 | 0           | 0.094521286 | 0           |
| 0 | -0.017164118 | 0 | 0           | 0 | -0.041083299 | 0           | 0.11119947  | 0           |
| 0 | -0.005315175 | 0 | 0.020689772 | 0 | 0            | 0.067768075 | 0           | 0           |
| 0 | 0            | 0 | 0.023952964 | 0 | 0            | 0.06774655  | 0           | 0           |
| 0 | 0            | 0 | 0           | 0 | 0            | 0.075899861 | 0           | 0.023338376 |
| 0 | 0            | 0 | 0.057090234 | 0 | 0            | 0           | 0           | 0.014198478 |
| 0 | 0            | 0 | 0           | 0 | 0            | 0.075894789 | 0           | 0           |
| 0 | 0            | 0 | 0.056837892 | 0 | 0            | 0           | 0           | 0           |
| 0 | -0.004645913 | 0 | 0.052702699 | 0 | 0            | 0           | 0           | 0           |
| 0 | -0.01269557  | 0 | 0           | 0 | 0            | 0.071964618 | 0           | 0           |
| 0 | 0            | 0 | 0.028781168 | 0 | 0            | 0.066733049 | 0           | 0.028754287 |
| 0 | 0            | 0 | 0.028490196 | 0 | 0            | 0.066812821 | 0           | 0           |
| 0 | 0            | 0 | 0           | 0 | 0            | 0.084968234 | 0           | 0.17458733  |
| 0 | 0            | 0 | 0           | 0 | -0.033239692 | 0           | 0.10241511  | 0.15461446  |
| 0 | 0            | 0 | 0.028886693 | 0 | 0            | 0.075314062 | 0           | 0.1896616   |
| 0 | -0.049669928 | 0 | 0           | 0 | 0            | 0           | 0           | 0.051705119 |
| 0 | 1.32E-05     | 0 | 0.022378338 | 0 | 0            | 0.080895099 | 0           | 0           |

|   |              |   |              |   |              |             |   |              |
|---|--------------|---|--------------|---|--------------|-------------|---|--------------|
| 0 | -0.04754961  | 0 | 0            | 0 | 0            | 0           | 0 | 0            |
| 0 | 0            | 0 | 0            | 0 | 0            | 0.072110866 | 0 | 0.17667836   |
| 0 | -0.004610084 | 0 | 0.0218614    | 0 | 0            | 0.064789641 | 0 | 0            |
| 0 | -0.049659075 | 0 | 0            | 0 | 0            | 0           | 0 | 0.051873649  |
| 0 | -0.047517191 | 0 | 0            | 0 | 0            | 0           | 0 | 0            |
| 0 | 0            | 0 | 0            | 0 | 0.10728551   | 0           | 0 | 0.19462409   |
| 0 | 0            | 0 | 0.023237406  | 0 | 0.08630997   | 0           | 0 | 0.008098433  |
| 0 | 0            | 0 | 0.022659929  | 0 | 0.086932046  | 0           | 0 | 0            |
| 0 | -0.001601695 | 0 | 0.019939921  | 0 | 0.088766961  | 0           | 0 | 0            |
| 0 | -0.017258318 | 0 | 0            | 0 | 0.094747416  | 0           | 0 | 0.020263493  |
| 0 | -0.014458776 | 0 | 0            | 0 | 0.096839895  | 0           | 0 | 0            |
| 0 | -0.022634194 | 0 | 0            | 0 | 0            | 0           | 0 | 0            |
| 0 | -0.009775863 | 0 | -0.02731919  | 0 | 0.090413085  | 0           | 0 | 0            |
| 0 | 0            | 0 | -0.025916956 | 0 | 0.096110887  | 0           | 0 | 0            |
| 0 | 0            | 0 | -0.02641883  | 0 | 0.096043717  | 0           | 0 | 0            |
| 0 | 0            | 0 | -0.026084071 | 0 | 0.095627074  | 0           | 0 | -0.002339293 |
| 0 | 0            | 0 | 0            | 0 | 0            | 0           | 0 | 0.20879025   |
| 0 | -0.009306238 | 0 | -0.026958806 | 0 | 0.091760389  | 0           | 0 | 0            |
| 0 | 0            | 0 | 0            | 0 | 0.070311277  | 0           | 0 | 0.20500273   |
| 0 | -0.022050284 | 0 | 0            | 0 | 0.054934395  | 0           | 0 | 0.023783754  |
| 0 | 0            | 0 | -0.026088855 | 0 | 0.097027276  | 0           | 0 | 0            |
| 0 | 0            | 0 | -0.025757159 | 0 | 0.096614029  | 0           | 0 | -0.002174035 |
| 0 | -0.019065977 | 0 | 0            | 0 | 0.057113779  | 0           | 0 | 0            |
| 0 | -0.037083354 | 0 | 0.02742244   | 0 | 0            | 0           | 0 | 0.055075139  |
| 0 | -0.006923846 | 0 | 0            | 0 | 0.066606021  | 0           | 0 | 0            |
| 0 | 0            | 0 | 0.067907949  | 0 | -0.036594644 | 0           | 0 | 0.024683808  |
| 0 | 0            | 0 | 0            | 0 | 0            | 0           | 0 | 0.005397185  |
| 0 | 0            | 0 | 0            | 0 | 0            | 0           | 0 | 0            |
| 0 | 0            | 0 | 0            | 0 | 0.070847434  | 0           | 0 | 0.002625477  |
| 0 | 0            | 0 | 0            | 0 | 0.070941812  | 0           | 0 | 0            |
| 0 | 0            | 0 | 0.06751801   | 0 | -0.036523706 | 0           | 0 | 0            |
| 0 | -0.042639663 | 0 | 0.058906783  | 0 | 0            | 0           | 0 | 0.057354578  |
| 0 | 0            | 0 | 0            | 0 | 0.071372635  | 0           | 0 | 0.20406307   |
| 0 | -0.021054396 | 0 | 0            | 0 | 0.0568616    | 0           | 0 | 0.022930622  |
| 0 | -0.034562214 | 0 | 0.02800136   | 0 | 0            | 0           | 0 | 0            |
| 0 | -0.018093453 | 0 | 0            | 0 | 0.05900008   | 0           | 0 | 0            |
| 0 | 0            | 0 | 0            | 0 | 0            | 0           | 0 | 0.20777724   |
| 0 | -0.040352677 | 0 | 0.059717947  | 0 | 0            | 0           | 0 | 0            |
| 0 | -0.050875781 | 0 | 0            | 0 | 0            | 0           | 0 | 0.27861882   |
| 0 | -0.058269257 | 0 | 0            | 0 | -0.014744492 | 0           | 0 | 0.067828254  |
| 0 | -0.007703562 | 0 | 0.059659061  | 0 | -0.036638704 | 0           | 0 | 0            |
| 0 | 0            | 0 | 0.062955666  | 0 | -0.035200335 | 0           | 0 | 0            |
| 0 | 0            | 0 | 0.042051225  | 0 | 0            | 0           | 0 | 0.24098352   |
| 0 | -0.051751757 | 0 | 0            | 0 | 0            | 0           | 0 | 0.06334309   |
| 0 | 0            | 0 | 0.069215773  | 0 | -0.038287223 | 0           | 0 | 0.025352041  |
| 0 | -0.055602937 | 0 | 0            | 0 | -0.014048368 | 0           | 0 | 0            |
| 0 | -0.051034166 | 0 | 0            | 0 | 0            | 0           | 0 | 0.25848847   |



|   |              |   |              |   |              |   |             |             |
|---|--------------|---|--------------|---|--------------|---|-------------|-------------|
| 0 | -0.03716256  | 0 | 0.027939181  | 0 | 0            | 0 | 0           | 0.055909781 |
| 0 | 0            | 0 | 0.068827729  | 0 | -0.038221562 | 0 | 0           | 0           |
| 0 | -0.049434542 | 0 | 0            | 0 | 0            | 0 | 0           | 0           |
| 0 | 0            | 0 | 0.042321443  | 0 | 0            | 0 | 0           | 0.023545358 |
| 0 | -0.034620163 | 0 | 0.028508497  | 0 | 0            | 0 | 0           | 0           |
| 0 | 0            | 0 | 0.04197975   | 0 | 0            | 0 | 0           | 0           |
| 0 | -0.051219571 | 0 | 0            | 0 | 0            | 0 | 0           | 0.053178736 |
| 0 | -0.05053607  | 0 | 0.000741195  | 0 | 0            | 0 | 0           | 0.052631761 |
| 0 | -0.051083959 | 0 | 0            | 0 | 0            | 0 | 0           | 0.27822882  |
| 0 | 0            | 0 | 0.079341857  | 0 | 0            | 0 | 0           | 0.21091994  |
| 0 | -0.058727405 | 0 | 0            | 0 | -0.015497758 | 0 | 0           | 0.068817534 |
| 0 | -0.050687456 | 0 | 0            | 0 | 0            | 0 | 0           | 0.25714799  |
| 0 | -0.007210487 | 0 | 0.061076957  | 0 | -0.038277853 | 0 | 0           | 0           |
| 0 | -0.049067474 | 0 | 0            | 0 | 0            | 0 | 0           | 0           |
| 0 | -0.048196635 | 0 | 0.001203175  | 0 | 0            | 0 | 0           | 0           |
| 0 | -0.088333218 | 0 | 0.075905115  | 0 | -0.078957597 | 0 | 0.094653334 | 0.13155042  |
| 0 | 0            | 0 | 0.042366789  | 0 | 0            | 0 | 0           | 0.24056933  |
| 0 | -0.005127002 | 0 | 0.035608116  | 0 | 0            | 0 | 0           | 0           |
| 0 | -0.056045829 | 0 | 0            | 0 | -0.014818119 | 0 | 0           | 0           |
| 0 | -0.049727982 | 0 | 0.001699274  | 0 | 0            | 0 | 0           | 0.052161748 |
| 0 | -0.086147088 | 0 | 0.076193847  | 0 | -0.078613702 | 0 | 0.094940891 | 0           |
| 0 | -0.11596626  | 0 | 0            | 0 | -0.12505732  | 0 | 0.092555046 | 0.13285406  |
| 0 | -0.047372625 | 0 | 0.002157111  | 0 | 0            | 0 | 0           | 0           |
| 0 | -0.11265295  | 0 | -0.014638693 | 0 | -0.10646258  | 0 | 0.099282372 | 0.13237268  |
| 0 | -0.11166605  | 0 | 0            | 0 | -0.11807186  | 0 | 0.09816332  | 0.26788826  |
| 0 | -0.02300623  | 0 | -0.030978218 | 0 | 0.11628804   | 0 | 0           | 0.020156672 |
| 0 | 0            | 0 | -0.031487995 | 0 | 0.13331408   | 0 | 0           | 0.18497537  |
| 0 | -0.11171452  | 0 | 0            | 0 | -0.11925154  | 0 | 0.099418644 | 0.13397216  |
| 0 | -0.11375654  | 0 | 0            | 0 | -0.12508102  | 0 | 0.092784844 | 0           |
| 0 | -0.020257725 | 0 | -0.031397437 | 0 | 0.11871971   | 0 | 0           | 0           |
| 0 | -0.11050342  | 0 | -0.014990691 | 0 | -0.10619541  | 0 | 0.099495966 | 0           |
| 0 | -0.020863874 | 0 | 0.006737162  | 0 | 0            | 0 | 0           | 0           |
| 0 | -0.10951223  | 0 | 0            | 0 | -0.11930626  | 0 | 0.099646587 | 0           |
| 0 | 0            | 0 | 0            | 0 | 0.005712744  | 0 | 0           | 0.22919544  |
| 0 | 0            | 0 | 0            | 0 | 0            | 0 | 0           | 0.22769079  |
| 0 | -0.024342379 | 0 | 0            | 0 | 0.087145714  | 0 | 0           | 0.21699744  |
| 0 | -0.018663201 | 0 | 0            | 0 | -0.003230108 | 0 | 0           | 0           |
| 0 | 0            | 0 | 0.015406203  | 0 | 0            | 0 | 0           | 0.21035428  |
| 0 | 0            | 0 | 0            | 0 | 0.07197996   | 0 | 0           | 0.24265978  |
| 0 | 0            | 0 | 0.026315943  | 0 | 0.047704698  | 0 | 0           | 0.031503149 |
| 0 | -0.11466704  | 0 | 0            | 0 | -0.12491826  | 0 | 0.090125744 | 0.13201734  |
| 0 | 0            | 0 | 0.02556669   | 0 | 0.048482219  | 0 | 0           | 0           |
| 0 | -0.076565995 | 0 | 0            | 0 | 0            | 0 | 0           | 0.26901144  |
| 0 | -0.016835992 | 0 | 0            | 0 | 0.060136599  | 0 | 0           | 0.042596269 |
| 0 | 0            | 0 | 0            | 0 | 0.005819638  | 0 | 0           | 0.015872643 |
| 0 | -0.027271718 | 0 | 0.042203162  | 0 | 0            | 0 | 0           | 0.061087149 |
| 0 | 0            | 0 | 0            | 0 | 0.005661242  | 0 | 0           | 0           |

|   |              |   |              |   |              |   |             |   |             |
|---|--------------|---|--------------|---|--------------|---|-------------|---|-------------|
| 0 | -0.11159825  | 0 | -0.013147055 | 0 | -0.10804506  | 0 | 0.096381831 | 0 | 0.13164075  |
| 0 | 0            | 0 | 0.01526475   | 0 | 0            | 0 | 0           | 0 | 0.007691718 |
| 0 | -0.11062107  | 0 | 0            | 0 | -0.11841206  | 0 | 0.09532105  | 0 | 0.26793691  |
| 0 | 0            | 0 | 0.015098302  | 0 | 0            | 0 | 0           | 0 | 0           |
| 0 | 0            | 0 | 0            | 0 | 0            | 0 | 0           | 0 | 0.20718703  |
| 0 | 0            | 0 | 0            | 0 | 0.072581062  | 0 | 0           | 0 | 0.026534412 |
| 0 | -0.013398759 | 0 | 0            | 0 | 0.06263361   | 0 | 0           | 0 | 0           |
| 0 | 0            | 0 | 0.053655413  | 0 | 0            | 0 | 0           | 0 | 0.25696134  |
| 0 | 0            | 0 | 0            | 0 | 0.073079206  | 0 | 0           | 0 | 0.24152103  |
| 0 | 0            | 0 | 0.026336951  | 0 | 0.048714419  | 0 | 0           | 0 | 0.031481755 |
| 0 | 0            | 0 | 0.015926668  | 0 | 0            | 0 | 0           | 0 | 0.20966016  |
| 0 | -0.031912786 | 0 | 0.034754404  | 0 | 0            | 0 | 0           | 0 | 0.28817171  |
| 0 | -0.02456613  | 0 | 0.042966073  | 0 | 0            | 0 | 0           | 0 | 0           |
| 0 | 0            | 0 | 0            | 0 | 0.072668262  | 0 | 0           | 0 | 0           |
| 0 | 0            | 0 | 0.025586878  | 0 | 0.049487591  | 0 | 0           | 0 | 0           |
| 0 | -0.11242343  | 0 | 0            | 0 | -0.12493825  | 0 | 0.09034445  | 0 | 0           |
| 0 | -0.015904693 | 0 | 0            | 0 | 0.062010972  | 0 | 0           | 0 | 0.041693213 |
| 0 | -0.026665544 | 0 | 0.043017546  | 0 | 0            | 0 | 0           | 0 | 0.060641437 |
| 0 | 0            | 0 | 0            | 0 | 0.004704504  | 0 | 0           | 0 | 0.22852573  |
| 0 | 0.01420396   | 0 | 0.020120022  | 0 | 0.064203977  | 0 | 0           | 0 | 0           |
| 0 | -0.033666177 | 0 | 0.042360491  | 0 | -0.011373647 | 0 | 0           | 0 | 0.068081617 |
| 0 | -0.10942092  | 0 | -0.013486679 | 0 | -0.10779772  | 0 | 0.096595259 | 0 | 0           |
| 0 | 0            | 0 | 0.053580268  | 0 | 0            | 0 | 0           | 0 | 0.037432777 |
| 0 | -0.012492593 | 0 | 0            | 0 | 0.064459673  | 0 | 0           | 0 | 0           |
| 0 | 0            | 0 | 0.054045303  | 0 | 0            | 0 | 0           | 0 | 0.25592252  |
| 0 | -0.032331728 | 0 | 0.034815882  | 0 | 0            | 0 | 0           | 0 | 0.065681568 |
| 0 | -0.10956091  | 0 | 0            | 0 | -0.040622283 | 0 | 0.071556274 | 0 | 0.12980889  |
| 0 | -0.023947061 | 0 | 0.043765533  | 0 | 0            | 0 | 0           | 0 | 0           |
| 0 | 0            | 0 | 0.053254247  | 0 | 0            | 0 | 0           | 0 | 0           |
| 0 | 0.011381839  | 0 | 0            | 0 | 0.081224313  | 0 | 0           | 0 | 0           |
| 0 | -0.030838228 | 0 | 0.042568691  | 0 | -0.010708942 | 0 | 0           | 0 | 0           |
| 0 | 0            | 0 | 0.014544888  | 0 | 0.060525804  | 0 | 0           | 0 | 0           |
| 0 | -0.031873148 | 0 | 0.03486958   | 0 | 0            | 0 | 0           | 0 | 0.28718306  |
| 0 | -0.029605456 | 0 | 0.035459212  | 0 | 0            | 0 | 0           | 0 | 0           |
| 0 | 0.014571085  | 0 | 0.020310736  | 0 | 0.065159958  | 0 | 0           | 0 | 0           |
| 0 | 0            | 0 | 0.052050713  | 0 | -0.006779321 | 0 | 0           | 0 | 0.26013823  |
| 0 | 0            | 0 | 0.047198041  | 0 | 0            | 0 | 0           | 0 | 0.25956154  |
| 0 | -0.10733067  | 0 | 0            | 0 | -0.040050226 | 0 | 0.071712023 | 0 | 0           |
| 0 | -0.033845864 | 0 | 0.043749205  | 0 | -0.013306836 | 0 | 0           | 0 | 0.068579241 |
| 0 | -0.068364348 | 0 | 0.030743098  | 0 | 0            | 0 | 0.046307823 | 0 | 0.097816474 |
| 0 | -0.048662676 | 0 | 0            | 0 | 0            | 0 | 0           | 0 | 0.2929946   |
| 0 | -0.044227961 | 0 | 0            | 0 | 0.009795841  | 0 | 0           | 0 | 0.29186711  |
| 0 | -0.03100705  | 0 | 0.043949374  | 0 | -0.01265039  | 0 | 0           | 0 | 0           |
| 0 | 0            | 0 | 0.051932337  | 0 | -0.006667718 | 0 | 0           | 0 | 0.038335049 |
| 0 | -0.049514214 | 0 | 0            | 0 | 0            | 0 | 0           | 0 | 0.29593849  |
| 0 | -0.066175823 | 0 | 0.031326835  | 0 | 0            | 0 | 0.046450882 | 0 | 0           |
| 0 | 0            | 0 | 0.051394399  | 0 | -0.006395041 | 0 | 0           | 0 | 0           |

|   |              |   |              |   |              |   |             |             |
|---|--------------|---|--------------|---|--------------|---|-------------|-------------|
| 0 | 0            | 0 | 0.053487773  | 0 | -0.008927146 | 0 | 0           | 0.25939221  |
| 0 | -0.048803207 | 0 | 0            | 0 | 0            | 0 | 0           | 0.074423725 |
| 0 | -0.044504799 | 0 | 0            | 0 | 0.01007809   | 0 | 0           | 0.07109041  |
| 0 | -0.048314494 | 0 | 0            | 0 | 0            | 0 | 0           | 0.29137854  |
| 0 | -0.067329068 | 0 | 0.031591186  | 0 | 0            | 0 | 0.056728446 | 0.25766781  |
| 0 | -0.10409883  | 0 | 0            | 0 | -0.032592899 | 0 | 0.080864999 | 0.25866654  |
| 0 | -0.085803971 | 0 | 0            | 0 | 0            | 0 | 0.050486692 | 0.26215838  |
| 0 | -0.046337616 | 0 | 0            | 0 | 0            | 0 | 0           | 0           |
| 0 | -0.044825773 | 0 | 0            | 0 | 0.00848808   | 0 | 0           | 0.29130311  |
| 0 | 0.009879459  | 0 | 0.053038935  | 0 | 0            | 0 | 0           | 0           |
| 0 | -0.04169477  | 0 | 0            | 0 | 0.010838369  | 0 | 0           | 0           |
| 0 | -0.068841313 | 0 | 0.06666169   | 0 | -0.042058912 | 0 | 0           | 0.094896542 |
| 0 | 0            | 0 | -0.022555685 | 0 | 0.089342874  | 0 | 0           | 0.23418779  |
| 0 | -0.066213288 | 0 | 0.066982073  | 0 | -0.041449051 | 0 | 0           | 0           |
| 0 | 0            | 0 | 0.10377834   | 0 | -0.059930135 | 0 | 0.059995211 | 0.045886779 |
| 0 | -0.02170623  | 0 | -0.022162967 | 0 | 0.073814872  | 0 | 0           | 0.042197509 |
| 0 | -0.022652513 | 0 | 0            | 0 | 0.051690807  | 0 | 0           | 0.26243885  |
| 0 | 0            | 0 | 0.10353543   | 0 | -0.059964379 | 0 | 0.060120008 | 0           |
| 0 | 0            | 0 | 0.021266469  | 0 | 0.086589044  | 0 | 0           | 0.2361657   |
| 0 | -0.01831395  | 0 | -0.02265413  | 0 | 0.076743287  | 0 | 0           | 0           |
| 0 | -0.018754866 | 0 | 0            | 0 | 0.092210033  | 0 | 0           | 0.25008925  |
| 0 | 0            | 0 | 0            | 0 | 0.02309697   | 0 | 0           | 0.24894816  |
| 0 | 0.007242626  | 0 | 0.045618247  | 0 | -0.001173773 | 0 | 0           | 0           |
| 0 | 0            | 0 | -0.022111923 | 0 | 0.089696166  | 0 | 0           | 0.23326746  |
| 0 | 0            | 0 | -0.02275525  | 0 | 0.089802778  | 0 | 0           | 0.021304241 |
| 0 | -0.017990903 | 0 | 0.020546842  | 0 | 0.074151709  | 0 | 0           | 0.049650704 |
| 0 | 0            | 0 | -0.023142386 | 0 | 0.090268294  | 0 | 0           | 0           |
| 0 | -0.020683073 | 0 | -0.021780208 | 0 | 0.075104567  | 0 | 0           | 0.041261815 |
| 0 | 0            | 0 | 0            | 0 | 0.067575905  | 0 | 0           | 0.23919816  |
| 0 | -0.021550692 | 0 | 0            | 0 | 0.053216911  | 0 | 0           | 0.26028384  |
| 0 | -0.022595111 | 0 | 0            | 0 | 0.051971506  | 0 | 0           | 0.047037256 |
| 0 | -0.014640389 | 0 | 0.019877953  | 0 | 0.077206614  | 0 | 0           | 0           |
| 0 | -0.017315232 | 0 | -0.022262163 | 0 | 0.077980183  | 0 | 0           | 0           |
| 0 | -0.060511407 | 0 | 0.039918871  | 0 | 0            | 0 | 0           | 0.2878153   |
| 0 | -0.019051957 | 0 | 0            | 0 | 0.054521993  | 0 | 0           | 0           |
| 0 | 0.005775945  | 0 | -0.026181864 | 0 | 0.097887879  | 0 | 0           | 0           |
| 0 | 0            | 0 | 0            | 0 | 0            | 0 | 0           | 0.24379447  |
| 0 | -0.072813056 | 0 | 0.010296172  | 0 | 0            | 0 | 0           | 0.26567661  |
| 0 | 0            | 0 | 0.097169932  | 0 | -0.049840463 | 0 | 0.069525543 | 0.18755222  |
| 0 | -0.048818915 | 0 | 0.002018108  | 0 | 0            | 0 | 0           | 0.29033216  |
| 0 | -0.049765508 | 0 | 0            | 0 | 0            | 0 | 0           | 0.29087949  |
| 0 | -0.043924043 | 0 | 0.056517665  | 0 | 0            | 0 | 0           | 0.28782379  |
| 0 | -0.048642611 | 0 | 0.001997676  | 0 | 0            | 0 | 0           | 0.073361301 |
| 0 | -0.047760308 | 0 | 0.002901728  | 0 | 0            | 0 | 0           | 0.28835483  |
| 0 | -0.017343138 | 0 | 0.086706889  | 0 | -0.057225131 | 0 | 0.054926155 | 0           |
| 0 | -0.045943805 | 0 | 0.002529648  | 0 | 0            | 0 | 0           | 0           |
| 0 | 0            | 0 | 0.062840377  | 0 | 0            | 0 | 0.036857934 | 0.20460383  |

|   |              |   |              |   |              |             |             |             |
|---|--------------|---|--------------|---|--------------|-------------|-------------|-------------|
| 0 | -0.085345239 | 0 | 0            | 0 | -0.005067333 | 0           | 0           | 0.29774873  |
| 0 | -0.088146837 | 0 | 0            | 0 | -0.066654479 | 0           | 0           | 0.31803523  |
| 0 | -0.087759924 | 0 | -0.069908156 | 0 | 0            | 0.044604258 | 0           | 0.28294778  |
| 0 | -0.088706121 | 0 | -0.014592345 | 0 | -0.054333497 | 0           | 0           | 0.099304805 |
| 0 | -0.088511215 | 0 | -0.070584903 | 0 | 0            | 0.045630728 | 0           | 0.10097804  |
| 0 | -0.088356295 | 0 | -0.071065987 | 0 | 0            | 0.044116823 | 0           | 0.099942834 |
| 0 | -0.088157316 | 0 | 0            | 0 | -0.066841674 | 0           | 0           | 0.10131753  |
| 0 | 0            | 0 | 0.087270265  | 0 | -0.027511315 | 0           | 0           | 0.23275059  |
| 0 | -0.023856773 | 0 | -0.027686786 | 0 | 0.11154123   | 0           | 0           | 0.24528994  |
| 0 | -0.086059098 | 0 | -0.01499457  | 0 | -0.053790946 | 0           | 0           | 0           |
| 0 | -0.086194935 | 0 | -0.070657299 | 0 | 0            | 0.045792369 | 0           | 0           |
| 0 | -0.086082303 | 0 | -0.071147286 | 0 | 0            | 0.044228212 | 0           | 0           |
| 0 | 0            | 0 | 0.015965112  | 0 | 0            | 0           | 0           | 0.24377614  |
| 0 | -0.056349572 | 0 | 0.053597621  | 0 | -0.011901352 | 0           | 0           | 0.30259254  |
| 0 | -0.085438846 | 0 | 0            | 0 | -0.066653128 | 0           | 0           | 0           |
| 0 | -0.087970716 | 0 | 0            | 0 | -0.06774182  | 0           | 0           | 0.31720429  |
| 0 | -0.088560748 | 0 | -0.013487293 | 0 | -0.056363399 | 0           | 0           | 0.099854525 |
| 0 | -0.087127032 | 0 | -0.069152753 | 0 | 0            | 0.040829021 | 0           | 0.28433242  |
| 0 | -0.085888785 | 0 | -0.013877164 | 0 | -0.055839372 | 0           | 0           | 0           |
| 0 | -0.087559019 | 0 | -0.070089596 | 0 | 0            | 0.041030067 | 0           | 0.099861743 |
| 0 | -0.040947139 | 0 | -0.024026497 | 0 | -0.079555835 | 0           | 0.064527149 | 0           |
| 0 | -0.085242737 | 0 | -0.07017102  | 0 | 0            | 0.041140374 | 0           | 0           |
| 0 | -0.074965082 | 0 | -0.014664574 | 0 | -0.030219528 | 0           | 0           | 0.31822165  |
| 0 | -0.079737272 | 0 | -0.051810915 | 0 | 0            | 0           | 0           | 0.30915289  |
| 0 | -0.074296148 | 0 | 0            | 0 | -0.04280366  | 0           | 0           | 0.32068552  |
| 0 | -0.074902839 | 0 | -0.014748713 | 0 | -0.030250243 | 0           | 0           | 0.097430287 |
| 0 | -0.037699508 | 0 | 0            | 0 | -0.10033287  | 0           | 0.064486625 | 0           |
| 0 | -0.080235339 | 0 | -0.051980943 | 0 | 0            | 0           | 0           | 0.090293312 |
| 0 | -0.034759212 | 0 | -0.023663798 | 0 | -0.072940705 | 0           | 0.072891972 | 0           |
| 0 | -0.075250052 | 0 | -0.013618701 | 0 | -0.033000441 | 0           | 0           | 0.31751943  |
| 0 | -0.077687966 | 0 | -0.052003311 | 0 | 0            | 0           | 0           | 0           |
| 0 | -0.072212969 | 0 | -0.01513843  | 0 | -0.029740999 | 0           | 0           | 0           |
| 0 | -0.073318375 | 0 | -0.040519462 | 0 | 0            | 0           | 0           | 0.3132324   |
| 0 | -0.039704768 | 0 | -0.022148049 | 0 | -0.081583653 | 0           | 0.062606272 | 0           |
| 0 | -0.079610724 | 0 | -0.052134429 | 0 | 0            | 0           | 0           | 0.30857658  |
| 0 | 0            | 0 | 0            | 0 | -0.08000244  | 0           | 0.060075838 | 0.19392866  |
| 0 | 0            | 0 | -0.010669795 | 0 | -0.069514077 | 0           | 0.059128997 | 0.1925352   |
| 0 | 0            | 0 | 0            | 0 | -0.079830739 | 0           | 0.057520252 | 0.19461311  |
| 0 | 0            | 0 | -0.010130674 | 0 | -0.072108866 | 0           | 0.061115534 | 0.028271584 |
| 0 | 0            | 0 | 0            | 0 | -0.08189182  | 0           | 0.059731604 | 0.02902105  |
| 0 | 0            | 0 | -0.010425903 | 0 | -0.0720306   | 0           | 0.061315468 | 0           |
| 0 | 0            | 0 | -0.010667714 | 0 | -0.071431317 | 0           | 0.058747008 | 0.027362216 |
| 0 | 0            | 0 | 0            | 0 | -0.082150966 | 0           | 0.05981669  | 0           |
| 0 | 0            | 0 | -0.010961784 | 0 | -0.071417976 | 0           | 0.058812911 | 0           |
| 0 | 0            | 0 | 0            | 0 | 0.015639403  | 0           | 0.038074864 | 0.18506521  |
| 0 | 0            | 0 | -0.015232952 | 0 | -0.070326746 | 0           | 0.056968034 | 0           |
| 0 | 0            | 0 | -0.008869009 | 0 | -0.07255266  | 0           | 0.05731349  | 0.19311716  |

|   |              |   |              |   |              |   |              |   |              |
|---|--------------|---|--------------|---|--------------|---|--------------|---|--------------|
| 0 | 0            | 0 | 0            | 0 | -0.081022307 | 0 | 0.056264028  | 0 | 0.1948213    |
| 0 | 0            | 0 | -0.008873646 | 0 | -0.074156767 | 0 | 0.057464844  | 0 | 0.027857271  |
| 0 | 0            | 0 | -0.009161682 | 0 | -0.074154233 | 0 | 0.057549327  | 0 | 0            |
| 0 | -0.033466758 | 0 | -0.022044822 | 0 | -0.042179422 | 0 | 0            | 0 | 0            |
| 0 | -0.03297086  | 0 | -0.065248226 | 0 | 0            | 0 | 0.03279854   | 0 | 0            |
| 0 | 0            | 0 | -0.011282968 | 0 | -0.037616722 | 0 | 0            | 0 | 0.23764916   |
| 0 | 0            | 0 | 0            | 0 | -0.047845621 | 0 | 0            | 0 | 0.23996508   |
| 0 | 0            | 0 | -0.050033435 | 0 | 0            | 0 | 0.029539637  | 0 | 0.21597728   |
| 0 | 0            | 0 | -0.05080342  | 0 | 0            | 0 | 0.027093429  | 0 | 0.21632374   |
| 0 | 0            | 0 | -0.010985043 | 0 | -0.038497239 | 0 | 0            | 0 | 0.022510671  |
| 0 | 0            | 0 | -0.050803679 | 0 | 0            | 0 | 0.030806302  | 0 | 0.023166348  |
| 0 | 0            | 0 | -0.011346544 | 0 | -0.038427926 | 0 | 0            | 0 | 0            |
| 0 | 0            | 0 | -0.051101703 | 0 | 0            | 0 | 0.030840329  | 0 | 0            |
| 0 | 0            | 0 | -0.011287539 | 0 | -0.026197966 | 0 | 0            | 0 | 0.24607192   |
| 0 | 0            | 0 | -0.009782852 | 0 | -0.040476847 | 0 | 0            | 0 | 0.23726333   |
| 0 | 0            | 0 | -0.038325691 | 0 | 0            | 0 | 0            | 0 | 0.2387744    |
| 0 | 0            | 0 | -0.049555589 | 0 | 0            | 0 | 0.026950518  | 0 | 0.21758254   |
| 0 | -0.057164903 | 0 | 0            | 0 | 0            | 0 | 0            | 0 | 0.31860934   |
| 0 | -0.056616336 | 0 | 0            | 0 | 0            | 0 | -0.002861649 | 0 | 0.31966553   |
| 0 | -0.05792294  | 0 | 0            | 0 | 0            | 0 | -0.010310833 | 0 | 0.32329628   |
| 0 | -0.05702888  | 0 | 0            | 0 | 0            | 0 | -0.001926919 | 0 | 0.087872306  |
| 0 | -0.054392942 | 0 | 0            | 0 | 0            | 0 | -0.001961278 | 0 | 0            |
| 0 | -0.056318391 | 0 | 0            | 0 | 0            | 0 | -0.005107149 | 0 | 0.32029598   |
| 0 | 0            | 0 | 0            | 0 | 0            | 0 | -0.002976311 | 0 | 0.26384728   |
| 0 | -0.14850468  | 0 | -0.020960325 | 0 | -0.074556045 | 0 | 0.03564759   | 0 | 0.17017155   |
| 0 | -0.14511654  | 0 | -0.020906818 | 0 | -0.069523786 | 0 | 0.039393839  | 0 | 0.32829478   |
| 0 | -0.14739764  | 0 | 0            | 0 | -0.091308891 | 0 | 0.033906938  | 0 | 0.33434035   |
| 0 | -0.14607003  | 0 | -0.021450837 | 0 | -0.073949567 | 0 | 0.035543858  | 0 | 0            |
| 0 | -0.13276168  | 0 | -0.02025101  | 0 | -0.052233573 | 0 | 0            | 0 | 0.34493632   |
| 0 | -0.12586807  | 0 | -0.058867719 | 0 | 0            | 0 | 0.006043816  | 0 | 0.33557508   |
| 0 | 0            | 0 | 0.017474892  | 0 | 0.0472251    | 0 | 0.19311119   | 0 | 0            |
| 0 | -0.005357961 | 0 | 0            | 0 | 0.059599983  | 0 | 0.19384229   | 0 | 0            |
| 0 | 0            | 0 | 0            | 0 | 0.063900242  | 0 | 0.19368681   | 0 | 0            |
| 0 | 0            | 0 | 0            | 0 | 0.063071295  | 0 | 0.19380006   | 0 | -0.000126187 |
| 0 | 0            | 0 | 0            | 0 | 0.063082618  | 0 | 0.19379955   | 0 | 0            |
| 0 | 0            | 0 | 0.044819639  | 0 | 0            | 0 | 0.19346469   | 0 | 0.009172052  |
| 0 | 0            | 0 | 0.044766361  | 0 | 0            | 0 | 0.19358967   | 0 | 0            |
| 0 | -0.006674577 | 0 | 0.039988252  | 0 | 0            | 0 | 0.19394966   | 0 | 0            |
| 0 | 0            | 0 | 0.017493433  | 0 | 0.048664122  | 0 | 0.19190309   | 0 | 0            |
| 0 | 0            | 0 | 0.043698211  | 0 | 0            | 0 | 0.19381115   | 0 | 0            |
| 0 | -0.004767445 | 0 | 0            | 0 | 0.061522667  | 0 | 0.19260869   | 0 | 0            |
| 0 | 0            | 0 | 0            | 0 | 0.064568894  | 0 | 0.19258002   | 0 | 2.48E-05     |
| 0 | 0            | 0 | 0            | 0 | 0.064580811  | 0 | 0.19258198   | 0 | 0            |
| 0 | -0.041819317 | 0 | 0            | 0 | 0            | 0 | 0.19574885   | 0 | 0.041342379  |
| 0 | -0.041231625 | 0 | 0            | 0 | 0            | 0 | 0.19630554   | 0 | 0            |
| 0 | 0            | 0 | 0.045473475  | 0 | 0            | 0 | 0.19230631   | 0 | 0.009454173  |
| 0 | 0            | 0 | 0.045419968  | 0 | 0            | 0 | 0.1924332    | 0 | 0            |

|   |              |   |              |   |             |   |            |   |              |
|---|--------------|---|--------------|---|-------------|---|------------|---|--------------|
| 0 | -0.006031659 | 0 | 0.040966308  | 0 | 0           | 0 | 0.192775   | 0 | 0            |
| 0 | -0.041477704 | 0 | 0            | 0 | 0           | 0 | 0.19460013 | 0 | 0.041224361  |
| 0 | -0.040886586 | 0 | 0            | 0 | 0           | 0 | 0.19515668 | 0 | 0            |
| 0 | -0.020126543 | 0 | 0            | 0 | 0           | 0 | 0.19766933 | 0 | 0            |
| 0 | 0            | 0 | 0            | 0 | 0           | 0 | 0.19816026 | 0 | 0.022961444  |
| 0 | 0            | 0 | 0            | 0 | 0           | 0 | 0.19843545 | 0 | 0.002297363  |
| 0 | 0            | 0 | 0            | 0 | 0           | 0 | 0.19846389 | 0 | 0            |
| 0 | -0.011858957 | 0 | -0.036312953 | 0 | 0.084654985 | 0 | 0.19297365 | 0 | 0            |
| 0 | 0            | 0 | 0            | 0 | 0           | 0 | 0.19705401 | 0 | 0.023701972  |
| 0 | 0            | 0 | -0.035600119 | 0 | 0.091974367 | 0 | 0.192849   | 0 | 0            |
| 0 | 0            | 0 | -0.03558023  | 0 | 0.091942356 | 0 | 0.19292962 | 0 | -0.006633587 |
| 0 | 0            | 0 | -0.034386236 | 0 | 0.090872292 | 0 | 0.19263323 | 0 | 0            |
| 0 | -0.011149064 | 0 | -0.035585588 | 0 | 0.08567969  | 0 | 0.1918342  | 0 | 0            |
| 0 | 0            | 0 | -0.034927252 | 0 | 0.092484892 | 0 | 0.19174988 | 0 | 0            |
| 0 | 0            | 0 | -0.034907323 | 0 | 0.092453168 | 0 | 0.19183013 | 0 | -0.006374041 |
| 0 | -0.020750412 | 0 | 0            | 0 | 0.043137197 | 0 | 0.19007578 | 0 | 0.020088456  |
| 0 | -0.020104457 | 0 | 0            | 0 | 0.043590189 | 0 | 0.19033095 | 0 | 0            |
| 0 | -0.007916814 | 0 | 0            | 0 | 0.05271494  | 0 | 0.19033177 | 0 | 0            |
| 0 | 0            | 0 | 0            | 0 | 0.05760672  | 0 | 0.18993347 | 0 | 0.027087239  |
| 0 | 0            | 0 | 0            | 0 | 0.057735256 | 0 | 0.19024909 | 0 | 0.000165693  |
| 0 | 0            | 0 | 0            | 0 | 0.057747168 | 0 | 0.19025307 | 0 | 0            |
| 0 | 0            | 0 | 0.016667175  | 0 | 0.044221389 | 0 | 0.20133348 | 0 | 0.022996713  |
| 0 | 0            | 0 | 0.01647697   | 0 | 0.04439224  | 0 | 0.20165029 | 0 | 0            |
| 0 | -0.014701577 | 0 | 0            | 0 | 0.049216645 | 0 | 0.20183417 | 0 | 0.033871533  |
| 0 | -0.01384989  | 0 | 0            | 0 | 0.049803506 | 0 | 0.20228528 | 0 | 0            |
| 0 | 0            | 0 | 0            | 0 | 0.059545008 | 0 | 0.20167353 | 0 | 0.047926473  |
| 0 | 0            | 0 | 0            | 0 | 0.059867538 | 0 | 0.20199458 | 0 | 0.019819939  |
| 0 | 0            | 0 | 0            | 0 | 0.059864316 | 0 | 0.20226202 | 0 | 0            |
| 0 | -0.024726436 | 0 | 0.031609056  | 0 | 0           | 0 | 0.20128889 | 0 | 0.049942664  |
| 0 | -0.02392086  | 0 | 0.031781954  | 0 | 0           | 0 | 0.20197016 | 0 | 0            |
| 0 | -0.019259152 | 0 | 0            | 0 | 0.045170592 | 0 | 0.18907648 | 0 | 0.018781672  |
| 0 | -0.018635747 | 0 | 0            | 0 | 0.045603262 | 0 | 0.18931662 | 0 | 0            |
| 0 | -0.048010156 | 0 | -0.009666605 | 0 | 0           | 0 | 0.19309847 | 0 | 0.045706307  |
| 0 | 0.009387158  | 0 | 0.011732686  | 0 | 0.055917998 | 0 | 0.20244917 | 0 | 0            |
| 0 | -0.047334733 | 0 | -0.00957417  | 0 | 0           | 0 | 0.19369988 | 0 | 0            |
| 0 | 0.007736319  | 0 | 0            | 0 | 0.06577328  | 0 | 0.20285091 | 0 | 0            |
| 0 | -0.043358036 | 0 | 0            | 0 | 0           | 0 | 0.19159997 | 0 | 0.070899985  |
| 0 | -0.043344426 | 0 | 0            | 0 | 0           | 0 | 0.19193554 | 0 | 0.042841678  |
| 0 | 0            | 0 | 0            | 0 | 0.058444936 | 0 | 0.18897262 | 0 | 0.02693013   |
| 0 | -0.042724701 | 0 | 0            | 0 | 0           | 0 | 0.19252742 | 0 | 0            |
| 0 | 0            | 0 | 0.008036832  | 0 | 0.053392604 | 0 | 0.20294901 | 0 | 0            |
| 0 | 0            | 0 | 0.041909218  | 0 | 0           | 0 | 0.2013465  | 0 | 0.059467525  |
| 0 | 0            | 0 | 0.016839805  | 0 | 0.04502029  | 0 | 0.20018658 | 0 | 0.02299532   |
| 0 | 0            | 0 | 0.041817092  | 0 | 0           | 0 | 0.20175032 | 0 | 0.028435119  |
| 0 | 0            | 0 | 0.016650472  | 0 | 0.045189882 | 0 | 0.20050332 | 0 | 0            |
| 0 | 0            | 0 | 0.041708332  | 0 | 0           | 0 | 0.20214156 | 0 | 0            |
| 0 | -0.013309722 | 0 | 0            | 0 | 0.051299444 | 0 | 0.20067474 | 0 | 0.032514394  |

|   |              |   |              |   |             |   |            |   |             |
|---|--------------|---|--------------|---|-------------|---|------------|---|-------------|
| 0 | -0.012481362 | 0 | 0            | 0 | 0.051863147 | 0 | 0.20111018 | 0 | 0           |
| 0 | 0            | 0 | 0            | 0 | 0.060573616 | 0 | 0.2005368  | 0 | 0.048191087 |
| 0 | -0.016224762 | 0 | 0            | 0 | 0.097394443 | 0 | 0.17768132 | 0 | 0.017501558 |
| 0 | -0.023698592 | 0 | 0.032631242  | 0 | 0           | 0 | 0.20013323 | 0 | 0.049124682 |
| 0 | -0.015683726 | 0 | 0            | 0 | 0.097783256 | 0 | 0.17790168 | 0 | 0           |
| 0 | -0.02289607  | 0 | 0.032798163  | 0 | 0           | 0 | 0.20080557 | 0 | 0           |
| 0 | -0.003678407 | 0 | 0.009801522  | 0 | 0.098119816 | 0 | 0.17739265 | 0 | 0           |
| 0 | 0            | 0 | 0.012573912  | 0 | 0.097731297 | 0 | 0.17716173 | 0 | 0.004315816 |
| 0 | 0            | 0 | 0.012490169  | 0 | 0.097816746 | 0 | 0.17722163 | 0 | 0           |
| 0 | 0.009943895  | 0 | 0.012139083  | 0 | 0.056781688 | 0 | 0.20129437 | 0 | 0           |
| 0 | 0            | 0 | 0            | 0 | 0.10897331  | 0 | 0.17754008 | 0 | 0.023477891 |
| 0 | -0.040588793 | 0 | 0            | 0 | 0           | 0 | 0.2032806  | 0 | 0.088341847 |
| 0 | -0.040648108 | 0 | 0            | 0 | 0           | 0 | 0.2036357  | 0 | 0.05963265  |
| 0 | -0.046694219 | 0 | -0.008424487 | 0 | 0           | 0 | 0.19201045 | 0 | 0.044825972 |
| 0 | -0.039859322 | 0 | 0            | 0 | 0           | 0 | 0.20449238 | 0 | 0           |
| 0 | -0.046021127 | 0 | -0.008333824 | 0 | 0           | 0 | 0.19260258 | 0 | 0           |
| 0 | -0.042644015 | 0 | 0            | 0 | 0           | 0 | 0.19068465 | 0 | 0.069929953 |
| 0 | 0            | 0 | 0.04234846   | 0 | 0           | 0 | 0.20023337 | 0 | 0.059226794 |
| 0 | -0.022138361 | 0 | -0.004539945 | 0 | 0           | 0 | 0.19456491 | 0 | 0           |
| 0 | 0.005646308  | 0 | 0.040284647  | 0 | 0           | 0 | 0.20371283 | 0 | 0           |
| 0 | -0.039959264 | 0 | 0            | 0 | 0           | 0 | 0.20217211 | 0 | 0.087244011 |
| 0 | 0            | 0 | 0.00404175   | 0 | 0           | 0 | 0.19412793 | 0 | 0.002961405 |
| 0 | 0            | 0 | 0.004018935  | 0 | 0           | 0 | 0.19416943 | 0 | 0           |
| 0 | 0            | 0 | 0.004204273  | 0 | 0           | 0 | 0.19375583 | 0 | 0.02611749  |
| 0 | 0            | 0 | 0            | 0 | 0           | 0 | 0.19445046 | 0 | 0.024675914 |
| 0 | 0            | 0 | 0            | 0 | 0           | 0 | 0.20588134 | 0 | 0.04479434  |
| 0 | 0            | 0 | 0.00486558   | 0 | 0           | 0 | 0.1927991  | 0 | 0.026187787 |
| 0 | -0.019983132 | 0 | -0.032721258 | 0 | 0.072331902 | 0 | 0.20057058 | 0 | 0.031874966 |
| 0 | -0.019192419 | 0 | -0.032863329 | 0 | 0.073009984 | 0 | 0.20100287 | 0 | 0           |
| 0 | -0.045961558 | 0 | 0.054105958  | 0 | 0           | 0 | 0.17414608 | 0 | 0.058156366 |
| 0 | -0.045169584 | 0 | 0.054330314  | 0 | 0           | 0 | 0.17486907 | 0 | 0           |
| 0 | 0            | 0 | -0.033127356 | 0 | 0.086657494 | 0 | 0.20047585 | 0 | 0.037816681 |
| 0 | 0            | 0 | -0.033171116 | 0 | 0.086719208 | 0 | 0.20079275 | 0 | 0.012627536 |
| 0 | 0            | 0 | -0.033244947 | 0 | 0.086791328 | 0 | 0.20097107 | 0 | 0           |
| 0 | 0.000778954  | 0 | -0.035722993 | 0 | 0.090252443 | 0 | 0.20170253 | 0 | 0           |
| 0 | -0.018490091 | 0 | -0.032018051 | 0 | 0.073573101 | 0 | 0.19949349 | 0 | 0.03053933  |
| 0 | -0.017721514 | 0 | -0.03215452  | 0 | 0.074225046 | 0 | 0.1999098  | 0 | 0           |
| 0 | 0            | 0 | -0.032363439 | 0 | 0.086653699 | 0 | 0.19942669 | 0 | 0.037718377 |
| 0 | -0.021086289 | 0 | 0            | 0 | 0.040044748 | 0 | 0.19758977 | 0 | 0.069611813 |
| 0 | -0.021011883 | 0 | 0            | 0 | 0.039989157 | 0 | 0.19798919 | 0 | 0.038799362 |
| 0 | -0.020074178 | 0 | 0            | 0 | 0.040622332 | 0 | 0.19850267 | 0 | 0           |
| 0 | 0            | 0 | 0            | 0 | 0.054495642 | 0 | 0.19784547 | 0 | 0.047747712 |
| 0 | -0.019493397 | 0 | 0            | 0 | 0.041754929 | 0 | 0.19664481 | 0 | 0.067625102 |
| 0 | -0.046438116 | 0 | -0.009053808 | 0 | 0           | 0 | 0.20034292 | 0 | 0.091523518 |
| 0 | -0.046140756 | 0 | -0.009058809 | 0 | 0           | 0 | 0.20074418 | 0 | 0.062155347 |
| 0 | -0.022312274 | 0 | -0.041855368 | 0 | 0.12836734  | 0 | 0.17683969 | 0 | 0.01567207  |
| 0 | -0.021840727 | 0 | -0.041940311 | 0 | 0.12878189  | 0 | 0.17704358 | 0 | 0           |

|   |              |   |              |   |              |             |              |             |
|---|--------------|---|--------------|---|--------------|-------------|--------------|-------------|
| 0 | -0.045268281 | 0 | -0.008943053 | 0 | 0            | 0.20158537  | 0            | 0           |
| 0 | -0.041774383 | 0 | 0            | 0 | 0            | 0.19926476  | 0            | 0.089697437 |
| 0 | 0            | 0 | 0.075971375  | 0 | 0            | 0.17287561  | 0            | 0.043061055 |
| 0 | 0            | 0 | -0.042364345 | 0 | 0.14468181   | 0           | 0.17675222   | 0.011932224 |
| 0 | -0.044908856 | 0 | -0.007871794 | 0 | 0            | 0.19928304  | 0            | 0.089893788 |
| 0 | -0.076930026 | 0 | 0            | 0 | 0            | 0.17602441  | 0            | 0.098519923 |
| 0 | -0.02383392  | 0 | 0            | 0 | 0.088866157  | 0           | 0.17270475   | 0.049720942 |
| 0 | 0            | 0 | 0.004136008  | 0 | 0            | 0.20128334  | 0            | 0.046324619 |
| 0 | -0.017058196 | 0 | 0.009675093  | 0 | 0.086739473  | 0           | 0.18508999   | 0.041343407 |
| 0 | -0.016148707 | 0 | 0.009444337  | 0 | 0.087581184  | 0           | 0.18563834   | 0           |
| 0 | -0.017358401 | 0 | 0            | 0 | 0.095188789  | 0           | 0.18525074   | 0.0650654   |
| 0 | 0            | 0 | 0.010246611  | 0 | 0.098404281  | 0           | 0.18489573   | 0.050178228 |
| 0 | 0            | 0 | -0.0170575   | 0 | -0.01074161  | 0           | -0.023003419 | 0.2433408   |
| 0 | -0.047114977 | 0 | 0.051677763  | 0 | 0            | 0.18180087  | 0            | 0.10934559  |
| 0 | -0.022884654 | 0 | -0.039555627 | 0 | 0.1247532    | 0           | 0.18417571   | 0.058724471 |
| 0 | -0.067376564 | 0 | 0.068594801  | 0 | -0.10883872  | 0           | 0.13817701   | 0.10332505  |
| 0 | -0.076927635 | 0 | 0.003815997  | 0 | 0            | 0.17146003  | 0            | 0.10258854  |
| 0 | -0.065476094 | 0 | 0.068783716  | 0 | -0.10865563  | 0           | 0.1385692    | 0           |
| 0 | -0.066592874 | 0 | 0.070083962  | 0 | -0.10991174  | 0           | 0.13534571   | 0.10292201  |
| 0 | -0.064672573 | 0 | 0.070277328  | 0 | -0.10974086  | 0           | 0.13573569   | 0           |
| 0 | -0.08674474  | 0 | 0            | 0 | -0.076544703 | 0           | 0.11697886   | 0.10020407  |
| 0 | 0            | 0 | 0.09094305   | 0 | -0.10073482  | 0           | 0.11242657   | 0.034389202 |
| 0 | 0            | 0 | 0.090723668  | 0 | -0.1007969   | 0           | 0.1125923    | 0           |
| 0 | -0.084792391 | 0 | 0            | 0 | -0.076210127 | 0           | 0.11726228   | 0           |
| 0 | -0.013309596 | 0 | 0.077837433  | 0 | -0.099681674 | 0           | 0.10978398   | 0           |
| 0 | 0            | 0 | 0.092065223  | 0 | -0.10203658  | 0           | 0.1102283    | 0.034949459 |
| 0 | 0            | 0 | 0.091842039  | 0 | -0.10210569  | 0           | 0.11039776   | 0           |
| 0 | -0.086207058 | 0 | 0            | 0 | -0.076190068 | 0           | 0.11394922   | 0.10020751  |
| 0 | 0            | 0 | 0.083309008  | 0 | -0.097175573 | 0           | 0.10860915   | 0           |
| 0 | -0.0811207   | 0 | 0            | 0 | -0.067762097 | 0           | 0.12678797   | 0.21276581  |
| 0 | -0.081557155 | 0 | 0            | 0 | -0.068157052 | 0           | 0.12771586   | 0.10501606  |
| 0 | -0.084224853 | 0 | 0            | 0 | -0.075855585 | 0           | 0.11422773   | 0           |
| 0 | 0            | 0 | 0.083851403  | 0 | -0.089343153 | 0           | 0.12266916   | 0.15581216  |
| 0 | 0            | 0 | 0.084080761  | 0 | -0.090401567 | 0           | 0.12376455   | 0.0431444   |
| 0 | -0.079599639 | 0 | 0            | 0 | -0.067848944 | 0           | 0.12807266   | 0           |
| 0 | 0            | 0 | 0.083827622  | 0 | -0.090452544 | 0           | 0.12407545   | 0           |
| 0 | -0.012409801 | 0 | 0.079226461  | 0 | -0.10072806  | 0           | 0.10734589   | 0           |
| 0 | -0.080703139 | 0 | 0            | 0 | -0.067842144 | 0           | 0.12351023   | 0.21376554  |
| 0 | 0            | 0 | 0.085151813  | 0 | -0.091098461 | 0           | 0.12025477   | 0.15686081  |
| 0 | -0.003710868 | 0 | 0.070435903  | 0 | -0.083167021 | 0           | 0.12219203   | 0           |
| 0 | -0.048897552 | 0 | 0            | 0 | 0            | 0.073705065 | 0            | 0.22496671  |
| 0 | -0.043729133 | 0 | 0.010243399  | 0 | 0            | 0.072511638 | 0            | 0.065610415 |
| 0 | -0.049978179 | 0 | 0            | 0 | 0            | 0.074858338 | 0            | 0.069672299 |
| 0 | -0.041674978 | 0 | 0.010665954  | 0 | 0            | 0.072669723 | 0            | 0           |
| 0 | -0.048091944 | 0 | 0            | 0 | 0            | 0.075125727 | 0            | 0           |
| 0 | -0.026633017 | 0 | 0            | 0 | -0.05158994  | 0           | 0.099544958  | 0           |
| 0 | -0.042606736 | 0 | 0.010891758  | 0 | 0            | 0.081997531 | 0            | 0.22312449  |



|   |              |   |             |   |              |             |             |             |
|---|--------------|---|-------------|---|--------------|-------------|-------------|-------------|
| 0 | -0.048954945 | 0 | 0           | 0 | 0            | 0.084700183 | 0           | 0.22405034  |
| 0 | -0.0435753   | 0 | 0.010813033 | 0 | 0            | 0.083167059 | 0           | 0.071989841 |
| 0 | 0            | 0 | 0           | 0 | -0.036869642 | 0           | 0.095824409 | 0.15126128  |
| 0 | -0.041505482 | 0 | 0.011207808 | 0 | 0            | 0.083464736 | 0           | 0           |
| 0 | 0            | 0 | 0           | 0 | -0.037622078 | 0           | 0.097028541 | 0.021609012 |
| 0 | 0            | 0 | 0           | 0 | -0.037774367 | 0           | 0.097117428 | 0           |
| 0 | 0            | 0 | 0.028109775 | 0 | 0.049686277  | 0           | 0           | 0.007683118 |
| 0 | 0            | 0 | 0.025303118 | 0 | 0.053796088  | 0           | 0           | 0           |
| 0 | 0            | 0 | 0.027511106 | 0 | 0.050321749  | 0           | 0           | 0           |
| 0 | -0.001149331 | 0 | 0.025134964 | 0 | 0.052082085  | 0           | 0           | 0           |
| 0 | 0            | 0 | 0           | 0 | 0.075570408  | 0           | 0           | 0.2066356   |
| 0 | -0.049206912 | 0 | 0           | 0 | 0            | 0.070971052 | 0           | 0.22650087  |
| 0 | 0            | 0 | 0.028224324 | 0 | 0            | 0.068544239 | 0           | 0.18857303  |
| 0 | -0.043459149 | 0 | 0.011514149 | 0 | 0            | 0.069544175 | 0           | 0.066088757 |
| 0 | -0.015673441 | 0 | 0           | 0 | 0.064549868  | 0           | 0           | 0.017448891 |
| 0 | -0.02689226  | 0 | 0.045265863 | 0 | 0            | 0           | 0           | 0.037320648 |
| 0 | -0.012739678 | 0 | 0           | 0 | 0.066707792  | 0           | 0           | 0           |
| 0 | -0.004674817 | 0 | 0           | 0 | 0.073893185  | 0           | 0           | 0           |
| 0 | 0            | 0 | 0           | 0 | 0.07676377   | 0           | 0           | 0.002422302 |
| 0 | 0            | 0 | 0           | 0 | 0.076838111  | 0           | 0           | 0           |
| 0 | 0            | 0 | 0.028348876 | 0 | 0            | 0.069645547 | 0           | 0.028223154 |
| 0 | -0.024533242 | 0 | 0.045962556 | 0 | 0            | 0           | 0           | 0           |
| 0 | -0.041367572 | 0 | 0.011957721 | 0 | 0            | 0.069695782 | 0           | 0           |
| 0 | 0            | 0 | 0.028031464 | 0 | 0.051352459  | 0           | 0           | 0.007786082 |
| 0 | 0            | 0 | 0.056552358 | 0 | 0            | 0           | 0           | 0.22172802  |
| 0 | 0            | 0 | 0.028059457 | 0 | 0            | 0.069723036 | 0           | 0           |
| 0 | 0            | 0 | 0.027419858 | 0 | 0.05201379   | 0           | 0           | 0           |
| 0 | -0.000737374 | 0 | 0.025149531 | 0 | 0.053960214  | 0           | 0           | 0           |
| 0 | 0            | 0 | 0           | 0 | 0.077252975  | 0           | 0           | 0.20548358  |
| 0 | 0            | 0 | 0           | 0 | -0.032664002 | 0           | 0.10539533  | 0.15343145  |
| 0 | -0.042267411 | 0 | 0.012096685 | 0 | 0            | 0.078632956 | 0           | 0.22456135  |
| 0 | -0.014851171 | 0 | 0           | 0 | 0.066924694  | 0           | 0           | 0.016784683 |
| 0 | -0.011941627 | 0 | 0           | 0 | 0.069042713  | 0           | 0           | 0           |
| 0 | 0            | 0 | 0.056736676 | 0 | 0            | 0           | 0           | 0.014022627 |
| 0 | 0            | 0 | 0.02844974  | 0 | 0            | 0.078765967 | 0           | 0.18789076  |
| 0 | -0.026560757 | 0 | 0.046229281 | 0 | 0            | 0           | 0           | 0.037339373 |
| 0 | 0            | 0 | 0.056493061 | 0 | 0            | 0           | 0           | 0           |
| 0 | -0.024191274 | 0 | 0.046912328 | 0 | 0            | 0           | 0           | 0           |
| 0 | -0.005268124 | 0 | 0.052039785 | 0 | 0            | 0           | 0           | 0           |
| 0 | 0            | 0 | 0           | 0 | -0.037368626 | 0           | 0.093266275 | 0.1525773   |
| 0 | 0            | 0 | 0.057202873 | 0 | 0            | 0           | 0           | 0.22083014  |
| 0 | 0            | 0 | 0           | 0 | 0            | 0.074961124 | 0           | 0.1750772   |
| 0 | -0.005592108 | 0 | 0.020984892 | 0 | 0            | 0.0677968   | 0           | 0           |
| 0 | 0            | 0 | 0.029125509 | 0 | 0            | 0.06566427  | 0           | 0.19028584  |
| 0 | -0.049805867 | 0 | 0           | 0 | 0            | 0           | 0           | 0.25890125  |
| 0 | -0.050376432 | 0 | 0           | 0 | 0            | 0           | 0           | 0.052412259 |
| 0 | -0.048217735 | 0 | 0           | 0 | 0            | 0           | 0           | 0           |

|   |              |   |              |   |              |   |             |              |
|---|--------------|---|--------------|---|--------------|---|-------------|--------------|
| 0 | -0.04978813  | 0 | 0            | 0 | 0            | 0 | 0           | 0.25771489   |
| 0 | 0            | 0 | 0.023397225  | 0 | 0.086422585  | 0 | 0           | 0.20034052   |
| 0 | -0.017450596 | 0 | 0            | 0 | 0.094865391  | 0 | 0           | 0.21259799   |
| 0 | -0.016625854 | 0 | 0.022726364  | 0 | 0.074931504  | 0 | 0           | 0.023956838  |
| 0 | -0.045860347 | 0 | 0.056221894  | 0 | -0.045297691 | 0 | 0           | 0.064075599  |
| 0 | -0.01377489  | 0 | 0.022185617  | 0 | 0.077540987  | 0 | 0           | 0            |
| 0 | -0.043167854 | 0 | 0.056445779  | 0 | -0.044726837 | 0 | 0           | 0            |
| 0 | 0            | 0 | -0.025995476 | 0 | 0.095561354  | 0 | 0           | 0.19878214   |
| 0 | -0.021183769 | 0 | -0.025613288 | 0 | 0.080416833  | 0 | 0           | 0.018088425  |
| 0 | -0.045974386 | 0 | 0.05753836   | 0 | -0.046736295 | 0 | 0           | 0.064891714  |
| 0 | -0.018282415 | 0 | -0.026051435 | 0 | 0.08296153   | 0 | 0           | 0            |
| 0 | -0.009984036 | 0 | -0.027705625 | 0 | 0.091509155  | 0 | 0           | 0            |
| 0 | 0            | 0 | -0.02674726  | 0 | 0.09714453   | 0 | 0           | 0            |
| 0 | 0            | 0 | -0.026412804 | 0 | 0.096726824  | 0 | 0           | -0.002385479 |
| 0 | -0.022245153 | 0 | 0            | 0 | 0.054819194  | 0 | 0           | 0.22786003   |
| 0 | -0.043267814 | 0 | 0.057765978  | 0 | -0.046184716 | 0 | 0           | 0            |
| 0 | -0.093233792 | 0 | 0.082404929  | 0 | -0.091799431 | 0 | 0.083125462 | 0.12637278   |
| 0 | 0            | 0 | -0.025661801 | 0 | 0.096533934  | 0 | 0           | 0.19785891   |
| 0 | -0.037145039 | 0 | 0.027574803  | 0 | 0            | 0 | 0           | 0.27356789   |
| 0 | -0.020261875 | 0 | -0.025341014 | 0 | 0.082254116  | 0 | 0           | 0.017366073  |
| 0 | 0            | 0 | 0.067979435  | 0 | -0.036451002 | 0 | 0           | 0.23994005   |
| 0 | -0.0173857   | 0 | -0.025768966 | 0 | 0.084751171  | 0 | 0           | 0            |
| 0 | 0            | 0 | 0            | 0 | 0            | 0 | 0           | 0.20879683   |
| 0 | 0            | 0 | 0            | 0 | 0.070861496  | 0 | 0           | 0.20491655   |
| 0 | -0.02244011  | 0 | 0            | 0 | 0.055377942  | 0 | 0           | 0.024166717  |
| 0 | -0.042829973 | 0 | 0.05905179   | 0 | 0            | 0 | 0           | 0.2513191    |
| 0 | -0.019432566 | 0 | 0            | 0 | 0.057550526  | 0 | 0           | 0            |
| 0 | -0.021239768 | 0 | 0            | 0 | 0.056749854  | 0 | 0           | 0.22583015   |
| 0 | -0.091047066 | 0 | 0.082673748  | 0 | -0.09142835  | 0 | 0.083317755 | 0            |
| 0 | -0.038059214 | 0 | 0.027726073  | 0 | 0            | 0 | 0           | 0.056050813  |
| 0 | 0            | 0 | 0.067922235  | 0 | -0.036288362 | 0 | 0           | 0.024722123  |
| 0 | 0            | 0 | 0.067532155  | 0 | -0.03621948  | 0 | 0           | 0            |
| 0 | -0.058317211 | 0 | 0            | 0 | -0.014574513 | 0 | 0           | 0.2823753    |
| 0 | -0.035505233 | 0 | 0.028298136  | 0 | 0            | 0 | 0           | 0            |
| 0 | -0.051882278 | 0 | 0            | 0 | 0            | 0 | 0           | 0.27936877   |
| 0 | 0            | 0 | 0.069290181  | 0 | -0.038152592 | 0 | 0           | 0.23952551   |
| 0 | -0.058876965 | 0 | 0            | 0 | -0.014244198 | 0 | 0           | 0.068453089  |
| 0 | -0.03721779  | 0 | 0.028089827  | 0 | 0            | 0 | 0           | 0.27317836   |
| 0 | -0.007822984 | 0 | 0.059614897  | 0 | -0.036336635 | 0 | 0           | 0            |
| 0 | 0            | 0 | 0.042493694  | 0 | 0            | 0 | 0           | 0.24093846   |
| 0 | -0.056188039 | 0 | 0            | 0 | -0.013561943 | 0 | 0           | 0            |
| 0 | -0.051351231 | 0 | 0            | 0 | 0            | 0 | 0           | 0.25876038   |
| 0 | -0.050658845 | 0 | 0.000767231  | 0 | 0            | 0 | 0           | 0.25827211   |
| 0 | -0.058772085 | 0 | 0            | 0 | -0.015333067 | 0 | 0           | 0.28208938   |
| 0 | -0.050868543 | 0 | 0.00071534   | 0 | 0            | 0 | 0           | 0.052959627  |
| 0 | -0.088075181 | 0 | 0.075751352  | 0 | -0.078206055 | 0 | 0.093628173 | 0.24834865   |
| 0 | -0.049842006 | 0 | 0.001729043  | 0 | 0            | 0 | 0           | 0.25666415   |

|   |              |   |              |   |              |   |             |             |
|---|--------------|---|--------------|---|--------------|---|-------------|-------------|
| 0 | -0.048491123 | 0 | 0.001180516  | 0 | 0            | 0 | 0           | 0           |
| 0 | -0.11656452  | 0 | -0.014576124 | 0 | -0.11255494  | 0 | 0.092554587 | 0.13089479  |
| 0 | -0.11561649  | 0 | 0            | 0 | -0.12415603  | 0 | 0.091322919 | 0.27029099  |
| 0 | -0.11568007  | 0 | 0            | 0 | -0.1252315   | 0 | 0.092683927 | 0.1325571   |
| 0 | -0.11227587  | 0 | -0.014595522 | 0 | -0.10557054  | 0 | 0.098157454 | 0.26543745  |
| 0 | -0.023202475 | 0 | -0.030928817 | 0 | 0.11635088   | 0 | 0           | 0.2090508   |
| 0 | -0.11438042  | 0 | -0.014930606 | 0 | -0.11225566  | 0 | 0.092760837 | 0           |
| 0 | -0.11238644  | 0 | -0.014486062 | 0 | -0.1067866   | 0 | 0.099379496 | 0.13210046  |
| 0 | -0.11133916  | 0 | 0            | 0 | -0.11831492  | 0 | 0.098285599 | 0.26745438  |
| 0 | -0.11344061  | 0 | 0            | 0 | -0.12525588  | 0 | 0.092908002 | 0           |
| 0 | -0.11021738  | 0 | -0.014824989 | 0 | -0.10654537  | 0 | 0.099599591 | 0           |
| 0 | 0            | 0 | 0.026517471  | 0 | 0.047631224  | 0 | 0           | 0.24950919  |
| 0 | -0.02737589  | 0 | 0.042290413  | 0 | 0            | 0 | 0           | 0.28185142  |
| 0 | -0.017036242 | 0 | 0            | 0 | 0.060032861  | 0 | 0           | 0.26007293  |
| 0 | 0            | 0 | 0            | 0 | 0.006002736  | 0 | 0           | 0.22917942  |
| 0 | -0.016093087 | 0 | 0.025802346  | 0 | 0.036887983  | 0 | 0           | 0.046816651 |
| 0 | -0.11525583  | 0 | -0.013089125 | 0 | -0.1136466   | 0 | 0.090060675 | 0.13031834  |
| 0 | -0.11431874  | 0 | 0            | 0 | -0.12401025  | 0 | 0.088887303 | 0.2702491   |
| 0 | 0            | 0 | 0            | 0 | 0.0726126    | 0 | 0           | 0.24264415  |
| 0 | 0            | 0 | 0.015325122  | 0 | 0            | 0 | 0           | 0.21039663  |
| 0 | 0            | 0 | 0.02619171   | 0 | 0.04838553   | 0 | 0           | 0.031533108 |
| 0 | 0            | 0 | 0.026560583  | 0 | 0.048542563  | 0 | 0           | 0.24845136  |
| 0 | -0.012600056 | 0 | 0.025113879  | 0 | 0.040069909  | 0 | 0           | 0           |
| 0 | 0            | 0 | 0.025438678  | 0 | 0.049162333  | 0 | 0           | 0           |
| 0 | -0.11121925  | 0 | -0.013105959 | 0 | -0.10714016  | 0 | 0.095247961 | 0.26577821  |
| 0 | -0.017202628 | 0 | 0            | 0 | 0.060631127  | 0 | 0           | 0.043019812 |
| 0 | -0.027631211 | 0 | 0.042272358  | 0 | 0            | 0 | 0           | 0.061495065 |
| 0 | -0.01609353  | 0 | 0            | 0 | 0.061916922  | 0 | 0           | 0.25786256  |
| 0 | -0.026762521 | 0 | 0.043107864  | 0 | 0            | 0 | 0           | 0.28024499  |
| 0 | -0.015131148 | 0 | 0.025835212  | 0 | 0.038679476  | 0 | 0           | 0.045882766 |
| 0 | -0.033731274 | 0 | 0.042460251  | 0 | -0.011315921 | 0 | 0           | 0.2908064   |
| 0 | -0.013747509 | 0 | 0            | 0 | 0.063113893  | 0 | 0           | 0           |
| 0 | -0.11304418  | 0 | -0.013431184 | 0 | -0.11336731  | 0 | 0.090269707 | 0           |
| 0 | 0            | 0 | 0.053708228  | 0 | 0            | 0 | 0           | 0.25697337  |
| 0 | -0.032403117 | 0 | 0.034953984  | 0 | 0            | 0 | 0           | 0.28866591  |
| 0 | -0.011660679 | 0 | 0.025154485  | 0 | 0.041799721  | 0 | 0           | 0           |
| 0 | -0.024895504 | 0 | 0.043020958  | 0 | 0            | 0 | 0           | 0           |
| 0 | 0.014134334  | 0 | 0.019983502  | 0 | 0.064730319  | 0 | 0           | 0           |
| 0 | -0.034002431 | 0 | 0.042258798  | 0 | -0.010994528 | 0 | 0           | 0.068444154 |
| 0 | -0.10926374  | 0 | 0            | 0 | -0.03992011  | 0 | 0.070393881 | 0.25997002  |
| 0 | -0.033908841 | 0 | 0.043854184  | 0 | -0.013259684 | 0 | 0           | 0.29021851  |
| 0 | -0.031151149 | 0 | 0.042466065  | 0 | -0.010338729 | 0 | 0           | 0           |
| 0 | 0            | 0 | 0.052050052  | 0 | -0.006604486 | 0 | 0           | 0.2601407   |
| 0 | -0.068304125 | 0 | 0.031104181  | 0 | 0            | 0 | 0.045238881 | 0.25908112  |
| 0 | -0.04894745  | 0 | 0            | 0 | 0            | 0 | 0           | 0.29327992  |
| 0 | -0.044591963 | 0 | 0            | 0 | 0.01018279   | 0 | 0           | 0.29222371  |
| 0 | -0.068965836 | 0 | 0.066761772  | 0 | -0.041918678 | 0 | 0           | 0.29393335  |

|   |              |   |              |   |              |   |              |              |
|---|--------------|---|--------------|---|--------------|---|--------------|--------------|
| 0 | -0.021912332 | 0 | -0.022074382 | 0 | 0.073616034  | 0 | 0            | 0.25676739   |
| 0 | 0            | 0 | 0.10354145   | 0 | -0.059168771 | 0 | 0.058796659  | 0.18527544   |
| 0 | 0            | 0 | -0.022677563 | 0 | 0.089755738  | 0 | 0            | 0.23414211   |
| 0 | -0.018187426 | 0 | 0.020716638  | 0 | 0.074136574  | 0 | 0            | 0.25468312   |
| 0 | -0.021937876 | 0 | -0.022348774 | 0 | 0.074282348  | 0 | 0            | 0.042426398  |
| 0 | -0.02087955  | 0 | -0.021687456 | 0 | 0.074906017  | 0 | 0            | 0.2547285    |
| 0 | -0.022792989 | 0 | 0            | 0 | 0.051855899  | 0 | 0            | 0.26256896   |
| 0 | -0.018536332 | 0 | -0.022825456 | 0 | 0.077181121  | 0 | 0            | 0            |
| 0 | -0.048773692 | 0 | 0.002021834  | 0 | 0            | 0 | 0            | 0.29028029   |
| 0 | -0.088735935 | 0 | -0.014520996 | 0 | -0.054195884 | 0 | 0            | 0.31553609   |
| 0 | -0.088269491 | 0 | -0.069882611 | 0 | 0            | 0 | 0.044704289  | 0.28334278   |
| 0 | -0.088174659 | 0 | -0.070426483 | 0 | 0            | 0 | 0.042967421  | 0.28351325   |
| 0 | -0.088186869 | 0 | 0            | 0 | -0.066643015 | 0 | 0            | 0.31807213   |
| 0 | -0.08883235  | 0 | -0.014653744 | 0 | -0.054245071 | 0 | 0            | 0.099425836  |
| 0 | -0.08891556  | 0 | -0.071068438 | 0 | 0            | 0 | 0.044122472  | 0.10048841   |
| 0 | -0.086156109 | 0 | -0.015041197 | 0 | -0.053723507 | 0 | 0            | 0            |
| 0 | -0.086605355 | 0 | -0.071152236 | 0 | 0            | 0 | 0.04423714   | 0            |
| 0 | -0.088587667 | 0 | -0.013415281 | 0 | -0.056228707 | 0 | 0            | 0.31495083   |
| 0 | -0.087374169 | 0 | -0.06944867  | 0 | 0            | 0 | 0.039878336  | 0.28466891   |
| 0 | -0.040562217 | 0 | -0.023512849 | 0 | -0.080652078 | 0 | 0.065070717  | 0            |
| 0 | -0.074983116 | 0 | -0.014673726 | 0 | -0.030204558 | 0 | 0            | 0.31823499   |
| 0 | -0.080282115 | 0 | -0.051811834 | 0 | 0            | 0 | 0            | 0.30959466   |
| 0 | 0            | 0 | -0.010097565 | 0 | -0.071149881 | 0 | 0.059887645  | 0.19195624   |
| 0 | 0            | 0 | 0            | 0 | -0.08096633  | 0 | 0.058371483  | 0.19389453   |
| 0 | 0            | 0 | -0.010628332 | 0 | -0.0705441   | 0 | 0.057390607  | 0.19250372   |
| 0 | 0            | 0 | -0.010093892 | 0 | -0.073024965 | 0 | 0.059580591  | 0.0273077    |
| 0 | 0            | 0 | -0.010389565 | 0 | -0.073011303 | 0 | 0.059637739  | 0            |
| 0 | 0            | 0 | -0.008838459 | 0 | -0.073259032 | 0 | 0.056104589  | 0.19310207   |
| 0 | 0            | 0 | -0.010925077 | 0 | -0.038342659 | 0 | 0            | 0.23764827   |
| 0 | 0            | 0 | -0.050178209 | 0 | 0            | 0 | 0.029629572  | 0.21595573   |
| 0 | -0.057156873 | 0 | 0            | 0 | 0            | 0 | -0.002863798 | 0.32008837   |
| 0 | -0.14803934  | 0 | -0.020897008 | 0 | -0.073614427 | 0 | 0.034307761  | 0.33030794   |
| 0 | 0            | 0 | 0.017314435  | 0 | 0.04815606   | 0 | 0.19301381   | 0            |
| 0 | -0.003194238 | 0 | 0.016339401  | 0 | 0.046188987  | 0 | 0.1931821    | 0            |
| 0 | 0            | 0 | 0.018616547  | 0 | 0.045993949  | 0 | 0.19298876   | 0.003383927  |
| 0 | 0            | 0 | 0.018531393  | 0 | 0.046094133  | 0 | 0.1930408    | 0            |
| 0 | -0.013779895 | 0 | 0            | 0 | 0.053410745  | 0 | 0.19362799   | 0.013110134  |
| 0 | -0.01324987  | 0 | 0            | 0 | 0.053788341  | 0 | 0.19379664   | 0            |
| 0 | -0.005506345 | 0 | 0            | 0 | 0.060373154  | 0 | 0.19372852   | 0            |
| 0 | 0            | 0 | 0            | 0 | 0.063904681  | 0 | 0.19368957   | -0.000110827 |
| 0 | 0            | 0 | 0            | 0 | 0.063915773  | 0 | 0.19369093   | 0            |
| 0 | 0            | 0 | 0            | 0 | 0.063095011  | 0 | 0.1934756    | 0.025553361  |
| 0 | -0.024481071 | 0 | 0.034657187  | 0 | 0            | 0 | 0.19302127   | 0.030465967  |
| 0 | -0.02389112  | 0 | 0.034797518  | 0 | 0            | 0 | 0.19342584   | 0            |
| 0 | 0            | 0 | 0.04485724   | 0 | 0            | 0 | 0.19309869   | 0.037966896  |
| 0 | 0            | 0 | 0.04498295   | 0 | 0            | 0 | 0.19342659   | 0.009219333  |
| 0 | 0            | 0 | 0.044924565  | 0 | 0            | 0 | 0.19355278   | 0            |

|   |              |   |              |   |             |   |            |   |              |
|---|--------------|---|--------------|---|-------------|---|------------|---|--------------|
| 0 | -0.006785591 | 0 | 0.040100625  | 0 | 0           | 0 | 0.19391108 | 0 | 0            |
| 0 | 0            | 0 | 0.018693688  | 0 | 0.04737276  | 0 | 0.19178024 | 0 | 0.003548232  |
| 0 | 0            | 0 | 0.018600964  | 0 | 0.047467541 | 0 | 0.19183054 | 0 | 0            |
| 0 | -0.002564973 | 0 | 0.016578487  | 0 | 0.047856047 | 0 | 0.1919534  | 0 | 0            |
| 0 | -0.012502029 | 0 | 0            | 0 | 0.055899975 | 0 | 0.19239397 | 0 | 0.012037139  |
| 0 | -0.011992359 | 0 | 0            | 0 | 0.05625933  | 0 | 0.19255102 | 0 | 0            |
| 0 | 0            | 0 | 0            | 0 | 0.064592211 | 0 | 0.19225945 | 0 | 0.025390708  |
| 0 | -0.023702492 | 0 | 0.035792891  | 0 | 0           | 0 | 0.19181152 | 0 | 0.030116465  |
| 0 | -0.023116663 | 0 | 0.035929342  | 0 | 0           | 0 | 0.19221573 | 0 | 0            |
| 0 | -0.042271638 | 0 | 0            | 0 | 0           | 0 | 0.19568787 | 0 | 0.041795631  |
| 0 | -0.041844787 | 0 | 0            | 0 | 0           | 0 | 0.19542541 | 0 | 0.067468365  |
| 0 | -0.041670837 | 0 | 0            | 0 | 0           | 0 | 0.19625086 | 0 | 0            |
| 0 | 0            | 0 | 0.045510695  | 0 | 0           | 0 | 0.19194355 | 0 | 0.037988161  |
| 0 | -0.041507772 | 0 | 0            | 0 | 0           | 0 | 0.19427409 | 0 | 0.067049655  |
| 0 | 0            | 0 | 0            | 0 | 0           | 0 | 0.19817305 | 0 | 0.0229744    |
| 0 | -0.019588271 | 0 | -0.035150747 | 0 | 0.077891128 | 0 | 0.19271577 | 0 | 0.012259972  |
| 0 | -0.01910392  | 0 | -0.035234219 | 0 | 0.078314078 | 0 | 0.19287764 | 0 | 0            |
| 0 | -0.011987179 | 0 | -0.036553513 | 0 | 0.085346692 | 0 | 0.19290462 | 0 | 0            |
| 0 | 0            | 0 | -0.035813724 | 0 | 0.092639302 | 0 | 0.19280517 | 0 | 0            |
| 0 | 0            | 0 | -0.035765925 | 0 | 0.092574536 | 0 | 0.19287232 | 0 | -0.006659416 |
| 0 | 0            | 0 | -0.035556152 | 0 | 0.091939739 | 0 | 0.19264215 | 0 | 0.016044533  |
| 0 | -0.018201307 | 0 | -0.034536515 | 0 | 0.079568721 | 0 | 0.19158505 | 0 | 0.011180734  |
| 0 | -0.017736081 | 0 | -0.03461549  | 0 | 0.079971221 | 0 | 0.19173393 | 0 | 0            |
| 0 | 0            | 0 | -0.034880495 | 0 | 0.092447758 | 0 | 0.1915291  | 0 | 0.017301394  |
| 0 | -0.020780607 | 0 | 0            | 0 | 0.043142833 | 0 | 0.18971547 | 0 | 0.048644183  |
| 0 | -0.020910228 | 0 | 0            | 0 | 0.043327307 | 0 | 0.19002666 | 0 | 0.020248259  |
| 0 | -0.020259682 | 0 | 0            | 0 | 0.043779612 | 0 | 0.19027531 | 0 | 0            |
| 0 | -0.014224217 | 0 | 0.016201927  | 0 | 0.034675957 | 0 | 0.2011619  | 0 | 0.03653577   |
| 0 | -0.013322    | 0 | 0.015984469  | 0 | 0.035501673 | 0 | 0.20165743 | 0 | 0            |
| 0 | 0            | 0 | 0            | 0 | 0.057760283 | 0 | 0.18990926 | 0 | 0.027086204  |
| 0 | 0            | 0 | 0.016727687  | 0 | 0.044221425 | 0 | 0.2009493  | 0 | 0.053236827  |
| 0 | 0            | 0 | 0.016599961  | 0 | 0.044585772 | 0 | 0.20130565 | 0 | 0.023013737  |
| 0 | 0            | 0 | 0.016409661  | 0 | 0.04475621  | 0 | 0.20162266 | 0 | 0            |
| 0 | -0.014919709 | 0 | 0            | 0 | 0.049512519 | 0 | 0.20178573 | 0 | 0.034125006  |
| 0 | -0.014732989 | 0 | 0            | 0 | 0.049222109 | 0 | 0.20146297 | 0 | 0.063185977  |
| 0 | -0.014058254 | 0 | 0            | 0 | 0.050102981 | 0 | 0.20224445 | 0 | 0            |
| 0 | 0            | 0 | 0            | 0 | 0.059895659 | 0 | 0.20162758 | 0 | 0.048092032  |
| 0 | -0.024747414 | 0 | 0.031643155  | 0 | 0           | 0 | 0.20087504 | 0 | 0.082424585  |
| 0 | -0.024881415 | 0 | 0.031642267  | 0 | 0           | 0 | 0.20127428 | 0 | 0.050123685  |
| 0 | -0.024064582 | 0 | 0.031812744  | 0 | 0           | 0 | 0.20196286 | 0 | 0            |
| 0 | -0.019288686 | 0 | 0            | 0 | 0.04517649  | 0 | 0.18872113 | 0 | 0.04693053   |
| 0 | -0.048030854 | 0 | -0.009645118 | 0 | 0           | 0 | 0.19275837 | 0 | 0.072492194  |
| 0 | -0.048050967 | 0 | -0.009669474 | 0 | 0           | 0 | 0.19309262 | 0 | 0.045746697  |
| 0 | 0.009356466  | 0 | 0.011668743  | 0 | 0.05618449  | 0 | 0.20243194 | 0 | 0            |
| 0 | -0.047371678 | 0 | -0.009582181 | 0 | 0           | 0 | 0.19369419 | 0 | 0            |
| 0 | -0.043398622 | 0 | 0            | 0 | 0           | 0 | 0.19154671 | 0 | 0.072374159  |
| 0 | -0.01280989  | 0 | 0.016408578  | 0 | 0.036538534 | 0 | 0.20000432 | 0 | 0.035192434  |

|   |              |   |              |   |              |   |             |   |             |
|---|--------------|---|--------------|---|--------------|---|-------------|---|-------------|
| 0 | -0.011927773 | 0 | 0.016194379  | 0 | 0.037335338  | 0 | 0.20048406  | 0 | 0           |
| 0 | 0            | 0 | 0.016888783  | 0 | 0.045002968  | 0 | 0.19980844  | 0 | 0.052691575 |
| 0 | 0            | 0 | 0.041857989  | 0 | 0            | 0 | 0.20135319  | 0 | 0.059484336 |
| 0 | -0.013340495 | 0 | 0            | 0 | 0.051305318  | 0 | 0.20030859  | 0 | 0.061415452 |
| 0 | -0.015879186 | 0 | 0.01206989   | 0 | 0.086875926  | 0 | 0.17705483  | 0 | 0.019460582 |
| 0 | -0.015300868 | 0 | 0.011941275  | 0 | 0.087403355  | 0 | 0.17730995  | 0 | 0           |
| 0 | -0.023724146 | 0 | 0.032662367  | 0 | 0            | 0 | 0.19972747  | 0 | 0.081474354 |
| 0 | -0.016249682 | 0 | 0            | 0 | 0.097404454  | 0 | 0.17738882  | 0 | 0.040443974 |
| 0 | 0            | 0 | 0.01261045   | 0 | 0.097725902  | 0 | 0.17686852  | 0 | 0.027210231 |
| 0 | -0.040675407 | 0 | 0            | 0 | 0            | 0 | 0.20329627  | 0 | 0.087125735 |
| 0 | -0.046713963 | 0 | -0.008401808 | 0 | 0            | 0 | 0.19167263  | 0 | 0.071294431 |
| 0 | 0            | 0 | 0.004065399  | 0 | 0            | 0 | 0.19383411  | 0 | 0.026129107 |
| 0 | -0.020012227 | 0 | -0.032692354 | 0 | 0.072309163  | 0 | 0.20022944  | 0 | 0.058676472 |
| 0 | -0.020077692 | 0 | -0.032792051 | 0 | 0.072514724  | 0 | 0.20055213  | 0 | 0.031969978 |
| 0 | -0.019284334 | 0 | -0.03292986  | 0 | 0.073183886  | 0 | 0.20098652  | 0 | 0           |
| 0 | -0.045981166 | 0 | 0.054135706  | 0 | 0            | 0 | 0.17379953  | 0 | 0.085306398 |
| 0 | 0            | 0 | -0.033144313 | 0 | 0.086715829  | 0 | 0.20047009  | 0 | 0.037798927 |
| 0 | -0.018518556 | 0 | -0.031989369 | 0 | 0.073550661  | 0 | 0.1991564   | 0 | 0.057011695 |
| 0 | -0.021039243 | 0 | 0            | 0 | 0.040004407  | 0 | 0.19759579  | 0 | 0.069768503 |
| 0 | -0.046163136 | 0 | -0.009034962 | 0 | 0            | 0 | 0.20037371  | 0 | 0.091227559 |
| 0 | -0.022333855 | 0 | -0.041834863 | 0 | 0.12835651   | 0 | 0.17658896  | 0 | 0.03526145  |
| 0 | -0.017097757 | 0 | 0.009721856  | 0 | 0.08669894   | 0 | 0.18472651  | 0 | 0.068648401 |
| 0 | -0.072370036 | 0 | 0.075316533  | 0 | -0.12242663  | 0 | 0.12644016  | 0 | 0.097752181 |
| 0 | -0.070470628 | 0 | 0.075505127  | 0 | -0.1222329   | 0 | 0.12674791  | 0 | 0           |
| 0 | -0.071531774 | 0 | 0.076630612  | 0 | -0.12296919  | 0 | 0.12374912  | 0 | 0.097629402 |
| 0 | -0.069605752 | 0 | 0.076838161  | 0 | -0.12279861  | 0 | 0.12406974  | 0 | 0           |
| 0 | -0.067179127 | 0 | 0.068462163  | 0 | -0.10815383  | 0 | 0.13724284  | 0 | 0.20448353  |
| 0 | -0.067477543 | 0 | 0.06851372   | 0 | -0.1086377   | 0 | 0.1381215   | 0 | 0.10342846  |
| 0 | -0.065568913 | 0 | 0.068750028  | 0 | -0.10852302  | 0 | 0.13854251  | 0 | 0           |
| 0 | -0.06639464  | 0 | 0.069948808  | 0 | -0.10921812  | 0 | 0.1344037   | 0 | 0.20514126  |
| 0 | -0.086504835 | 0 | 0            | 0 | -0.075893166 | 0 | 0.11591732  | 0 | 0.21380439  |
| 0 | -0.087084499 | 0 | 0            | 0 | -0.07617429  | 0 | 0.11685455  | 0 | 0.10055046  |
| 0 | 0            | 0 | 0.090759272  | 0 | -0.10003568  | 0 | 0.11134003  | 0 | 0.15298399  |
| 0 | 0            | 0 | 0.090950233  | 0 | -0.10090587  | 0 | 0.11249204  | 0 | 0.034378069 |
| 0 | 0            | 0 | 0.090732405  | 0 | -0.10096912  | 0 | 0.11265856  | 0 | 0           |
| 0 | -0.085116182 | 0 | 0            | 0 | -0.075851372 | 0 | 0.11714356  | 0 | 0           |
| 0 | -0.013276716 | 0 | 0.077857457  | 0 | -0.099794581 | 0 | 0.1098273   | 0 | 0           |
| 0 | 0            | 0 | 0.091875764  | 0 | -0.10133067  | 0 | 0.10913705  | 0 | 0.15422452  |
| 0 | -0.085967273 | 0 | 0            | 0 | -0.075523282 | 0 | 0.11287467  | 0 | 0.21494145  |
| 0 | -0.081317391 | 0 | 0            | 0 | -0.067508773 | 0 | 0.12674025  | 0 | 0.21300445  |
| 0 | 0            | 0 | 0.08387925   | 0 | -0.089695866 | 0 | 0.12277333  | 0 | 0.15571931  |
| 0 | -0.043676932 | 0 | 0.010605622  | 0 | 0            | 0 | 0.071449869 | 0 | 0.2246635   |
| 0 | -0.050095518 | 0 | 0            | 0 | 0            | 0 | 0.073891354 | 0 | 0.22572951  |
| 0 | -0.044820903 | 0 | 0.010546455  | 0 | 0            | 0 | 0.072643941 | 0 | 0.066710481 |
| 0 | -0.042739357 | 0 | 0.010965719  | 0 | 0            | 0 | 0.07279961  | 0 | 0           |
| 0 | -0.043509222 | 0 | 0.011153426  | 0 | 0            | 0 | 0.082297553 | 0 | 0.22376019  |
| 0 | 0            | 0 | 0.028335623  | 0 | 0.049490019  | 0 | 0           | 0 | 0.2138626   |

|   |              |   |              |   |              |   |             |   |             |
|---|--------------|---|--------------|---|--------------|---|-------------|---|-------------|
| 0 | 0            | 0 | 0            | 0 | -0.036992224 | 0 | 0.095871758 | 0 | 0.15122881  |
| 0 | -0.014869725 | 0 | 0.027646281  | 0 | 0.039667242  | 0 | 0           | 0 | 0.021871354 |
| 0 | -0.026992475 | 0 | 0.045339367  | 0 | 0            | 0 | 0           | 0 | 0.24632177  |
| 0 | -0.015866497 | 0 | 0            | 0 | 0.064438935  | 0 | 0           | 0 | 0.22291657  |
| 0 | -0.011869666 | 0 | 0.027080901  | 0 | 0.042393584  | 0 | 0           | 0 | 0           |
| 0 | 0            | 0 | 0.027895651  | 0 | 0.050983286  | 0 | 0           | 0 | 0.007661367 |
| 0 | 0            | 0 | 0.027265241  | 0 | 0.051668377  | 0 | 0           | 0 | 0           |
| 0 | -0.001389791 | 0 | 0.024807162  | 0 | 0.053358548  | 0 | 0           | 0 | 0           |
| 0 | -0.043400154 | 0 | 0.011900538  | 0 | 0            | 0 | 0.068472796 | 0 | 0.22616301  |
| 0 | 0            | 0 | 0            | 0 | 0.076761451  | 0 | 0           | 0 | 0.20646612  |
| 0 | 0            | 0 | 0.028242063  | 0 | 0.051178064  | 0 | 0           | 0 | 0.21270252  |
| 0 | 0            | 0 | 0.028683504  | 0 | 0            | 0 | 0.068567202 | 0 | 0.18834177  |
| 0 | -0.016299498 | 0 | 0            | 0 | 0.065416539  | 0 | 0           | 0 | 0.018072173 |
| 0 | -0.027644165 | 0 | 0.045419213  | 0 | 0            | 0 | 0           | 0 | 0.038101541 |
| 0 | -0.0133497   | 0 | 0            | 0 | 0.06756589   | 0 | 0           | 0 | 0           |
| 0 | -0.014017271 | 0 | 0.027561482  | 0 | 0.042056466  | 0 | 0           | 0 | 0.021160866 |
| 0 | -0.025252347 | 0 | 0.046110244  | 0 | 0            | 0 | 0           | 0 | 0           |
| 0 | -0.011041228 | 0 | 0.027007205  | 0 | 0.04473473   | 0 | 0           | 0 | 0           |
| 0 | -0.015035114 | 0 | 0            | 0 | 0.066816876  | 0 | 0           | 0 | 0.22087452  |
| 0 | 0            | 0 | 0.056848673  | 0 | 0            | 0 | 0           | 0 | 0.22172387  |
| 0 | -0.026653813 | 0 | 0.046304372  | 0 | 0            | 0 | 0           | 0 | 0.24507996  |
| 0 | -0.050508754 | 0 | 0            | 0 | 0            | 0 | 0           | 0 | 0.25951332  |
| 0 | -0.045894758 | 0 | 0.056284962  | 0 | -0.045160343 | 0 | 0           | 0 | 0.27994332  |
| 0 | -0.016814369 | 0 | 0.022880999  | 0 | 0.074916286  | 0 | 0           | 0 | 0.21751876  |
| 0 | -0.046434844 | 0 | 0.056103387  | 0 | -0.044783716 | 0 | 0           | 0 | 0.064647085 |
| 0 | -0.043719181 | 0 | 0.056333054  | 0 | -0.044229107 | 0 | 0           | 0 | 0           |
| 0 | -0.046004504 | 0 | 0.057605402  | 0 | -0.046607358 | 0 | 0           | 0 | 0.27959747  |
| 0 | -0.021378301 | 0 | -0.025517551 | 0 | 0.080210765  | 0 | 0           | 0 | 0.22090816  |
| 0 | 0            | 0 | -0.026320449 | 0 | 0.096649655  | 0 | 0           | 0 | 0.1985828   |
| 0 | -0.021667649 | 0 | -0.025992499 | 0 | 0.081375655  | 0 | 0           | 0 | 0.018498756 |
| 0 | -0.018753733 | 0 | -0.026424551 | 0 | 0.083905709  | 0 | 0           | 0 | 0           |
| 0 | -0.020450705 | 0 | -0.025240338 | 0 | 0.082041171  | 0 | 0           | 0 | 0.21891814  |
| 0 | -0.092984841 | 0 | 0.082249411  | 0 | -0.091041485 | 0 | 0.082004513 | 0 | 0.24900304  |
| 0 | -0.022624106 | 0 | 0            | 0 | 0.055263128  | 0 | 0           | 0 | 0.2281383   |
| 0 | -0.038115111 | 0 | 0.027879613  | 0 | 0            | 0 | 0           | 0 | 0.27435563  |
| 0 | 0            | 0 | 0.067993464  | 0 | -0.036147833 | 0 | 0           | 0 | 0.23992485  |
| 0 | -0.058922352 | 0 | 0            | 0 | -0.014075846 | 0 | 0           | 0 | 0.28288791  |
| 0 | -0.050987272 | 0 | 0.000741716  | 0 | 0            | 0 | 0           | 0 | 0.25855073  |
| 0 | -0.11621428  | 0 | -0.014530954 | 0 | -0.11169575  | 0 | 0.09132814  | 0 | 0.26779443  |
| 0 | -0.116346    | 0 | -0.014458095 | 0 | -0.11278613  | 0 | 0.092651667 | 0 | 0.13068897  |
| 0 | -0.1153332   | 0 | 0            | 0 | -0.12432901  | 0 | 0.091451234 | 0 | 0.26992688  |
| 0 | -0.11201     | 0 | -0.0144436   | 0 | -0.10589135  | 0 | 0.098252102 | 0 | 0.26506819  |
| 0 | -0.11414029  | 0 | -0.014802656 | 0 | -0.11250736  | 0 | 0.092864231 | 0 | 0           |
| 0 | -0.016290033 | 0 | 0.026030042  | 0 | 0.036583637  | 0 | 0           | 0 | 0.26607674  |
| 0 | 0            | 0 | 0.026409981  | 0 | 0.048234639  | 0 | 0           | 0 | 0.24938724  |
| 0 | -0.11490668  | 0 | -0.013046375 | 0 | -0.11277837  | 0 | 0.088826505 | 0 | 0.2680959   |
| 0 | -0.017414827 | 0 | 0            | 0 | 0.060516767  | 0 | 0           | 0 | 0.2605028   |

|   |              |   |              |   |              |             |            |             |
|---|--------------|---|--------------|---|--------------|-------------|------------|-------------|
| 0 | -0.02773196  | 0 | 0.042361235  | 0 | 0            | 0           | 0          | 0.28222169  |
| 0 | -0.016424788 | 0 | 0.025650959  | 0 | 0.037477537  | 0           | 0          | 0.047169424 |
| 0 | -0.015317233 | 0 | 0.026058251  | 0 | 0.038377863  | 0           | 0          | 0.26391671  |
| 0 | -0.012918877 | 0 | 0.02495439   | 0 | 0.040641352  | 0           | 0          | 0           |
| 0 | -0.034062598 | 0 | 0.042364548  | 0 | -0.010941355 | 0           | 0          | 0.29111447  |
| 0 | -0.022146716 | 0 | -0.02225267  | 0 | 0.074070304  | 0           | 0          | 0.25694707  |
| 0 | -0.088861376 | 0 | -0.014580704 | 0 | -0.054109476 | 0           | 0          | 0.31563831  |
| 0 | -0.088729967 | 0 | -0.070430644 | 0 | 0            | 0.042974336 | 0          | 0.28395736  |
| 0 | 0            | 0 | -0.010061197 | 0 | -0.072128501 | 0           | 0.05821372 | 0.19192718  |
| 0 | -0.013240422 | 0 | 0.018184707  | 0 | 0.037111746  | 0           | 0.19284528 | 0.016019674 |
| 0 | -0.012649689 | 0 | 0.018054345  | 0 | 0.03765132   | 0           | 0.19305612 | 0           |
| 0 | -0.003362154 | 0 | 0.016114278  | 0 | 0.047094592  | 0           | 0.19308537 | 0           |
| 0 | 0            | 0 | 0.018453378  | 0 | 0.046931142  | 0           | 0.19289636 | 0.003367269 |
| 0 | 0            | 0 | 0.01836143   | 0 | 0.047026085  | 0           | 0.1929415  | 0           |
| 0 | 0            | 0 | 0.018664453  | 0 | 0.045980238  | 0           | 0.19264094 | 0.03109444  |
| 0 | -0.014224457 | 0 | 0            | 0 | 0.054027305  | 0           | 0.19349911 | 0.013554099 |
| 0 | -0.013684523 | 0 | 0            | 0 | 0.054413573  | 0           | 0.19369748 | 0           |
| 0 | -0.01380883  | 0 | 0            | 0 | 0.053415168  | 0           | 0.19328959 | 0.039897621 |
| 0 | 0            | 0 | 0            | 0 | 0.063947277  | 0           | 0.19341016 | 0.024203459 |
| 0 | -0.024980176 | 0 | 0.034761389  | 0 | 0            | 0           | 0.1929412  | 0.030985922 |
| 0 | -0.024500726 | 0 | 0.034688566  | 0 | 0            | 0           | 0.19263663 | 0.06072499  |
| 0 | -0.024376844 | 0 | 0.034902437  | 0 | 0            | 0           | 0.19335043 | 0           |
| 0 | -0.011948632 | 0 | 0.018285003  | 0 | 0.039464193  | 0           | 0.19161985 | 0.014953974 |
| 0 | -0.011368992 | 0 | 0.018164275  | 0 | 0.03998204   | 0           | 0.19181786 | 0           |
| 0 | 0            | 0 | 0.045035435  | 0 | 0            | 0           | 0.19309188 | 0.036579241 |
| 0 | 0            | 0 | 0.018720409  | 0 | 0.047400468  | 0           | 0.19143573 | 0.027456136 |
| 0 | -0.012534426 | 0 | 0            | 0 | 0.055896218  | 0           | 0.19206282 | 0.038389232 |
| 0 | -0.023722136 | 0 | 0.035823909  | 0 | 0            | 0           | 0.19143098 | 0.060051088 |
| 0 | -0.042299455 | 0 | 0            | 0 | 0            | 0           | 0.1953672  | 0.067432779 |
| 0 | -0.019846527 | 0 | -0.03539034  | 0 | 0.078563794  | 0           | 0.19259599 | 0.012470949 |
| 0 | -0.019404766 | 0 | -0.03546893  | 0 | 0.078919163  | 0           | 0.19280271 | 0           |
| 0 | -0.019614721 | 0 | -0.035124316 | 0 | 0.077869878  | 0           | 0.19240775 | 0.036522873 |
| 0 | 0            | 0 | -0.035728168 | 0 | 0.092541783  | 0           | 0.19257908 | 0.013563604 |
| 0 | -0.018227132 | 0 | -0.034510321 | 0 | 0.079547727  | 0           | 0.19128132 | 0.035100146 |
| 0 | -0.020940456 | 0 | 0            | 0 | 0.043332987  | 0           | 0.18966629 | 0.048807741 |
| 0 | -0.014257897 | 0 | 0.016255556  | 0 | 0.034637079  | 0           | 0.20076684 | 0.067601266 |
| 0 | -0.014423099 | 0 | 0.016110218  | 0 | 0.035025967  | 0           | 0.20112329 | 0.036747998 |
| 0 | -0.013513415 | 0 | 0.01588994   | 0 | 0.035848096  | 0           | 0.20162159 | 0           |
| 0 | 0            | 0 | 0.016649202  | 0 | 0.044568361  | 0           | 0.20092451 | 0.052959172 |
| 0 | -0.014971401 | 0 | 0            | 0 | 0.049477459  | 0           | 0.20142431 | 0.062984628 |
| 0 | -0.024924082 | 0 | 0.031653671  | 0 | 0            | 0           | 0.20084902 | 0.083462359 |
| 0 | -0.048071653 | 0 | -0.009647995 | 0 | 0            | 0           | 0.19275255 | 0.072532436 |
| 0 | -0.012841047 | 0 | 0.016458217  | 0 | 0.036499745  | 0           | 0.1996137  | 0.065863493 |
| 0 | -0.015905318 | 0 | 0.01211243   | 0 | 0.086846163  | 0           | 0.17674782 | 0.043583494 |
| 0 | -0.020106699 | 0 | -0.032763103 | 0 | 0.072491837  | 0           | 0.20021105 | 0.058767198 |
| 0 | -0.072177443 | 0 | 0.075186032  | 0 | -0.12173466  | 0           | 0.12541398 | 0.20490164  |
| 0 | -0.072618229 | 0 | 0.075222814  | 0 | -0.12208031  | 0           | 0.12634759 | 0.098000027 |



|   |              |   |              |   |              |   |            |   |             |
|---|--------------|---|--------------|---|--------------|---|------------|---|-------------|
| 0 | -0.070720105 | 0 | 0.075428954  | 0 | -0.12192702  | 0 | 0.12665409 | 0 | 0           |
| 0 | -0.071332861 | 0 | 0.076511336  | 0 | -0.1222748   | 0 | 0.12272807 | 0 | 0.20572453  |
| 0 | -0.067287073 | 0 | 0.06842314   | 0 | -0.10800218  | 0 | 0.13721264 | 0 | 0.20460956  |
| 0 | -0.086852916 | 0 | 0            | 0 | -0.075516237 | 0 | 0.1157928  | 0 | 0.21420108  |
| 0 | 0            | 0 | 0.090767899  | 0 | -0.10020619  | 0 | 0.11140306 | 0 | 0.15292855  |
| 0 | -0.044764133 | 0 | 0.010909576  | 0 | 0            | 0 | 0.07157752 | 0 | 0.22544314  |
| 0 | -0.015058304 | 0 | 0.027853612  | 0 | 0.039369643  | 0 | 0          | 0 | 0.22919525  |
| 0 | 0            | 0 | 0.028090509  | 0 | 0.050827833  | 0 | 0          | 0 | 0.21364261  |
| 0 | -0.015464935 | 0 | 0.027357708  | 0 | 0.040738938  | 0 | 0          | 0 | 0.022409356 |
| 0 | -0.016490226 | 0 | 0            | 0 | 0.065301819  | 0 | 0          | 0 | 0.22336927  |
| 0 | -0.012449936 | 0 | 0.026797516  | 0 | 0.043452843  | 0 | 0          | 0 | 0           |
| 0 | -0.027742276 | 0 | 0.045490623  | 0 | 0            | 0 | 0          | 0 | 0.24699486  |
| 0 | -0.014197817 | 0 | 0.027766304  | 0 | 0.041761824  | 0 | 0          | 0 | 0.22712085  |
| 0 | -0.046466047 | 0 | 0.056168275  | 0 | -0.044648401 | 0 | 0          | 0 | 0.28041073  |
| 0 | -0.021861195 | 0 | -0.02589588  | 0 | 0.081161471  | 0 | 0          | 0 | 0.22112487  |
| 0 | -0.11599735  | 0 | -0.014411375 | 0 | -0.11192621  | 0 | 0.09142639 | 0 | 0.26754172  |
| 0 | -0.016571407 | 0 | 0.025821559  | 0 | 0.03730221   | 0 | 0          | 0 | 0.26638802  |
| 0 | -0.01366436  | 0 | 0.017985291  | 0 | 0.037874186  | 0 | 0.19273244 | 0 | 0.0164057   |
| 0 | -0.013067611 | 0 | 0.017853686  | 0 | 0.038414539  | 0 | 0.19295131 | 0 | 0           |
| 0 | -0.013270377 | 0 | 0.018231474  | 0 | 0.037075839  | 0 | 0.19248093 | 0 | 0.044743359 |
| 0 | 0            | 0 | 0.018498655  | 0 | 0.046914818  | 0 | 0.19254491 | 0 | 0.031031897 |
| 0 | -0.014283076 | 0 | 0            | 0 | 0.054015147  | 0 | 0.19311516 | 0 | 0.042298909 |
| 0 | -0.024996938 | 0 | 0.034796278  | 0 | 0            | 0 | 0.19255639 | 0 | 0.061268287 |
| 0 | -0.011969493 | 0 | 0.018333406  | 0 | 0.039429887  | 0 | 0.19125992 | 0 | 0.043264199 |
| 0 | -0.019920279 | 0 | -0.035359374 | 0 | 0.07847481   | 0 | 0.19232939 | 0 | 0.036762362 |
| 0 | -0.014455335 | 0 | 0.016160276  | 0 | 0.034986568  | 0 | 0.20072772 | 0 | 0.067806538 |
| 0 | -0.072446627 | 0 | 0.075092235  | 0 | -0.12140539  | 0 | 0.12529616 | 0 | 0.20514602  |
| 0 | -0.015650954 | 0 | 0.027563705  | 0 | 0.040437774  | 0 | 0          | 0 | 0.22955361  |
| 0 | -0.013691992 | 0 | 0.018048821  | 0 | 0.037827307  | 0 | 0.19236494 | 0 | 0.045266879 |

| SE | bsnp_rs6469674 | SE | bsnp_rs13269857 | SE | bsnp_rs3020106 | SE | bsnp_rs3020119 | SE |
|----|----------------|----|-----------------|----|----------------|----|----------------|----|
| 0  | 0              | 0  | 0               | 0  | 0              | 0  | 0              | 0  |
| 0  | 0              | 0  | 0               | 0  | 0              | 0  | 0              | 0  |
| 0  | 0              | 0  | 0               | 0  | 0              | 0  | 0              | 0  |
| 0  | 0              | 0  | -0.12235695     | 0  | 0              | 0  | 0              | 0  |
| 0  | 0              | 0  | 0               | 0  | -0.12087476    | 0  | 0              | 0  |
| 0  | 0              | 0  | 0               | 0  | 0              | 0  | 0              | 0  |
| 0  | 0              | 0  | 0               | 0  | 0              | 0  | 0              | 0  |
| 0  | 0              | 0  | 0               | 0  | 0              | 0  | 0              | 0  |
| 0  | 0              | 0  | 0               | 0  | 0              | 0  | 0.036898302    | 0  |
| 0  | 0              | 0  | 0               | 0  | 0              | 0  | 0              | 0  |
| 0  | 0              | 0  | 0               | 0  | 0              | 0  | 0              | 0  |
| 0  | 0.044048041    | 0  | 0               | 0  | 0              | 0  | 0              | 0  |
| 0  | 0              | 0  | 0               | 0  | 0              | 0  | 0              | 0  |
| 0  | 0              | 0  | -0.086074711    | 0  | 0              | 0  | 0              | 0  |
| 0  | 0              | 0  | 0               | 0  | -0.084548432   | 0  | 0              | 0  |
| 0  | 0              | 0  | -0.084471872    | 0  | 0              | 0  | 0              | 0  |
| 0  | 0              | 0  | 0               | 0  | -0.083227606   | 0  | 0              | 0  |
| 0  | 0              | 0  | 0               | 0  | 0              | 0  | 0              | 0  |
| 0  | 0              | 0  | 0               | 0  | 0              | 0  | -0.069479878   | 0  |
| 0  | 0              | 0  | 0               | 0  | 0              | 0  | 0              | 0  |
| 0  | 0              | 0  | 0               | 0  | 0              | 0  | 0              | 0  |
| 0  | 0              | 0  | 0               | 0  | 0              | 0  | -0.042457901   | 0  |
| 0  | 0              | 0  | -0.11414943     | 0  | 0              | 0  | 0              | 0  |
| 0  | 0              | 0  | -0.11407303     | 0  | 0              | 0  | 0              | 0  |
| 0  | 0              | 0  | 0               | 0  | 0              | 0  | 0              | 0  |
| 0  | 0              | 0  | 0               | 0  | -0.11347348    | 0  | 0              | 0  |
| 0  | 0              | 0  | 0               | 0  | -0.11302893    | 0  | 0              | 0  |
| 0  | 0              | 0  | 0               | 0  | 0              | 0  | 0              | 0  |
| 0  | 0              | 0  | 0               | 0  | 0              | 0  | 0              | 0  |
| 0  | 0.035411556    | 0  | 0               | 0  | 0              | 0  | 0              | 0  |
| 0  | 0              | 0  | 0               | 0  | 0              | 0  | 0              | 0  |
| 0  | 0              | 0  | 0               | 0  | 0              | 0  | 0              | 0  |
| 0  | 0              | 0  | 0               | 0  | 0              | 0  | 0              | 0  |
| 0  | 0.032181856    | 0  | 0               | 0  | 0              | 0  | 0              | 0  |
| 0  | 0              | 0  | 0               | 0  | 0              | 0  | 0              | 0  |
| 0  | 0              | 0  | -0.12011968     | 0  | 0              | 0  | 0              | 0  |
| 0  | 0.029691322    | 0  | -0.12020656     | 0  | 0              | 0  | 0              | 0  |
| 0  | 0              | 0  | -0.11468474     | 0  | 0              | 0  | 0              | 0  |
| 0  | 0              | 0  | -0.11743386     | 0  | 0              | 0  | 0.010931367    | 0  |
| 0  | 0              | 0  | -0.11951045     | 0  | 0              | 0  | 0              | 0  |
| 0  | 0              | 0  | -0.11778853     | 0  | -0.004745532   | 0  | 0              | 0  |
| 0  | 0              | 0  | 0               | 0  | -0.11856426    | 0  | 0              | 0  |
| 0  | 0.029821756    | 0  | 0               | 0  | -0.11865332    | 0  | 0              | 0  |
| 0  | 0              | 0  | 0               | 0  | -0.1115779     | 0  | 0              | 0  |
| 0  | 0              | 0  | 0               | 0  | -0.11516137    | 0  | 0.013449555    | 0  |

|   |             |   |              |   |              |   |              |   |
|---|-------------|---|--------------|---|--------------|---|--------------|---|
| 0 | 0           | 0 | 0            | 0 | -0.11797587  | 0 | 0            | 0 |
| 0 | 0           | 0 | 0            | 0 | 0            | 0 | 0            | 0 |
| 0 | 0.14066026  | 0 | 0            | 0 | 0            | 0 | 0            | 0 |
| 0 | 0           | 0 | 0            | 0 | 0            | 0 | 0            | 0 |
| 0 | 0           | 0 | -0.10335004  | 0 | 0            | 0 | 0            | 0 |
| 0 | 0           | 0 | 0            | 0 | 0            | 0 | 0            | 0 |
| 0 | 0           | 0 | 0            | 0 | -0.10161654  | 0 | 0            | 0 |
| 0 | 0           | 0 | 0            | 0 | 0            | 0 | 0            | 0 |
| 0 | 0.04127354  | 0 | 0            | 0 | 0            | 0 | 0            | 0 |
| 0 | 0           | 0 | 0            | 0 | 0            | 0 | 0            | 0 |
| 0 | 0           | 0 | 0            | 0 | 0            | 0 | 0            | 0 |
| 0 | 0.03908709  | 0 | 0            | 0 | 0            | 0 | 0            | 0 |
| 0 | 0           | 0 | 0            | 0 | 0            | 0 | 0            | 0 |
| 0 | 0           | 0 | 0            | 0 | 0            | 0 | 0            | 0 |
| 0 | 0.03364935  | 0 | 0            | 0 | 0            | 0 | 0            | 0 |
| 0 | 0           | 0 | 0            | 0 | 0            | 0 | 0            | 0 |
| 0 | 0           | 0 | 0            | 0 | 0            | 0 | 0            | 0 |
| 0 | 0           | 0 | 0            | 0 | 0            | 0 | 0.014460632  | 0 |
| 0 | 0           | 0 | 0            | 0 | 0            | 0 | 0.008420394  | 0 |
| 0 | 0           | 0 | 0            | 0 | 0            | 0 | 0.004023527  | 0 |
| 0 | 0           | 0 | 0            | 0 | 0            | 0 | 0.040762674  | 0 |
| 0 | 0           | 0 | 0            | 0 | 0            | 0 | 0            | 0 |
| 0 | 0.053398814 | 0 | 0            | 0 | 0            | 0 | 0.040617772  | 0 |
| 0 | 0           | 0 | 0            | 0 | 0            | 0 | 0.032052213  | 0 |
| 0 | 0           | 0 | 0            | 0 | 0            | 0 | -0.059195726 | 0 |
| 0 | -0.18465225 | 0 | 0            | 0 | 0            | 0 | 0            | 0 |
| 0 | 0           | 0 | 0            | 0 | 0            | 0 | 0            | 0 |
| 0 | 0           | 0 | -0.10703644  | 0 | 0            | 0 | 0            | 0 |
| 0 | 0           | 0 | 0            | 0 | 0            | 0 | 0            | 0 |
| 0 | 0           | 0 | 0            | 0 | 0            | 0 | 0            | 0 |
| 0 | 0           | 0 | 0            | 0 | -0.10329821  | 0 | 0            | 0 |
| 0 | 0           | 0 | 0            | 0 | 0            | 0 | 0            | 0 |
| 0 | 0.028286622 | 0 | 0            | 0 | 0            | 0 | 0            | 0 |
| 0 | 0           | 0 | -0.090115833 | 0 | 0            | 0 | -0.048171457 | 0 |
| 0 | 0           | 0 | 0            | 0 | 0            | 0 | -0.069136907 | 0 |
| 0 | 0           | 0 | -0.081895749 | 0 | 0            | 0 | -0.066369032 | 0 |
| 0 | 0           | 0 | 0            | 0 | -0.080126375 | 0 | -0.065808696 | 0 |
| 0 | 0           | 0 | 0            | 0 | -0.087441005 | 0 | -0.046495694 | 0 |
| 0 | 0           | 0 | -0.075720263 | 0 | 0            | 0 | 0            | 0 |
| 0 | 0           | 0 | 0            | 0 | -0.073740112 | 0 | 0            | 0 |
| 0 | 0           | 0 | -0.084182331 | 0 | 0            | 0 | 0            | 0 |
| 0 | 0           | 0 | -0.057696379 | 0 | 0            | 0 | 0            | 0 |
| 0 | 0.027606705 | 0 | -0.084246786 | 0 | 0            | 0 | 0            | 0 |
| 0 | 0           | 0 | -0.081068683 | 0 | 0            | 0 | 0            | 0 |
| 0 | 0           | 0 | 0            | 0 | 0            | 0 | 0            | 0 |
| 0 | 0           | 0 | 0            | 0 | -0.055625021 | 0 | 0            | 0 |
| 0 | 0           | 0 | 0            | 0 | -0.082594118 | 0 | 0            | 0 |

|   |             |   |              |   |              |   |              |   |
|---|-------------|---|--------------|---|--------------|---|--------------|---|
| 0 | 0.027618087 | 0 | 0            | 0 | -0.082663302 | 0 | 0            | 0 |
| 0 | 0           | 0 | -0.082939747 | 0 | 0            | 0 | 0            | 0 |
| 0 | 0           | 0 | 0            | 0 | -0.079284155 | 0 | 0            | 0 |
| 0 | 0           | 0 | -0.084247627 | 0 | 0            | 0 | 0            | 0 |
| 0 | 0           | 0 | -0.07705541  | 0 | -0.009357497 | 0 | 0            | 0 |
| 0 | 0           | 0 | 0            | 0 | -0.081245208 | 0 | 0            | 0 |
| 0 | 0           | 0 | 0            | 0 | -0.082715071 | 0 | 0            | 0 |
| 0 | 0           | 0 | 0            | 0 | 0            | 0 | -0.073606182 | 0 |
| 0 | 0           | 0 | -0.082944577 | 0 | 0            | 0 | 0            | 0 |
| 0 | 0.025819384 | 0 | -0.082991022 | 0 | 0            | 0 | 0            | 0 |
| 0 | 0           | 0 | 0            | 0 | 0            | 0 | 0            | 0 |
| 0 | 0           | 0 | 0            | 0 | -0.081642734 | 0 | 0            | 0 |
| 0 | 0.02566735  | 0 | 0            | 0 | -0.081693941 | 0 | 0            | 0 |
| 0 | 0           | 0 | 0            | 0 | 0            | 0 | 0            | 0 |
| 0 | 0.025788179 | 0 | 0            | 0 | 0            | 0 | 0            | 0 |
| 0 | 0           | 0 | -0.080788702 | 0 | 0            | 0 | 0            | 0 |
| 0 | 0           | 0 | -0.082299831 | 0 | 0            | 0 | 0            | 0 |
| 0 | 0           | 0 | -0.063067859 | 0 | -0.022106273 | 0 | 0            | 0 |
| 0 | 0           | 0 | 0            | 0 | -0.079442975 | 0 | 0            | 0 |
| 0 | 0           | 0 | 0            | 0 | -0.081075979 | 0 | 0            | 0 |
| 0 | 0           | 0 | 0            | 0 | 0            | 0 | 0            | 0 |
| 0 | 0           | 0 | 0            | 0 | 0            | 0 | -0.078075855 | 0 |
| 0 | 0           | 0 | 0            | 0 | 0            | 0 | -0.041013707 | 0 |
| 0 | 0           | 0 | 0            | 0 | 0            | 0 | 0            | 0 |
| 0 | 0           | 0 | 0            | 0 | 0            | 0 | 0            | 0 |
| 0 | 0           | 0 | 0            | 0 | 0            | 0 | 0            | 0 |
| 0 | 0           | 0 | 0            | 0 | 0            | 0 | -0.069957118 | 0 |
| 0 | 0           | 0 | 0            | 0 | 0            | 0 | 0            | 0 |
| 0 | 0.1045438   | 0 | 0            | 0 | 0            | 0 | 0            | 0 |
| 0 | 0.045587686 | 0 | 0            | 0 | 0            | 0 | 0            | 0 |
| 0 | 0           | 0 | -0.14301763  | 0 | 0            | 0 | 0            | 0 |
| 0 | 0           | 0 | 0            | 0 | 0            | 0 | -0.066817051 | 0 |
| 0 | 0.009466799 | 0 | 0            | 0 | 0            | 0 | -0.067179146 | 0 |
| 0 | 0           | 0 | 0            | 0 | 0            | 0 | 0            | 0 |
| 0 | 0           | 0 | 0            | 0 | 0            | 0 | 0            | 0 |
| 0 | 0.036981485 | 0 | 0            | 0 | 0            | 0 | 0            | 0 |
| 0 | 0.10059589  | 0 | 0            | 0 | 0            | 0 | 0            | 0 |
| 0 | 0           | 0 | 0            | 0 | 0            | 0 | -0.027877844 | 0 |
| 0 | 0           | 0 | 0            | 0 | 0            | 0 | 0            | 0 |
| 0 | 0           | 0 | 0            | 0 | 0            | 0 | -0.048679711 | 0 |
| 0 | 0           | 0 | 0            | 0 | -0.14165695  | 0 | 0            | 0 |
| 0 | 0           | 0 | 0            | 0 | 0            | 0 | 0            | 0 |
| 0 | 0           | 0 | 0            | 0 | 0            | 0 | 0            | 0 |
| 0 | 0           | 0 | 0            | 0 | 0            | 0 | 0            | 0 |
| 0 | 0           | 0 | 0            | 0 | 0            | 0 | -0.034560747 | 0 |
| 0 | 0           | 0 | 0            | 0 | 0            | 0 | -0.038223463 | 0 |
| 0 | 0.023972152 | 0 | 0            | 0 | 0            | 0 | -0.038499571 | 0 |

|   |             |   |              |   |              |              |              |
|---|-------------|---|--------------|---|--------------|--------------|--------------|
| 0 | 0           | 0 | -0.12884653  | 0 | 0            | 0            | 0            |
| 0 | 0           | 0 | 0            | 0 | 0            | 0            | 0            |
| 0 | 0           | 0 | -0.1212396   | 0 | 0            | -0.023168761 | 0            |
| 0 | 0.034819027 | 0 | 0            | 0 | 0            | 0            | 0            |
| 0 | 0           | 0 | -0.11206464  | 0 | 0            | 0            | 0            |
| 0 | 0.028571412 | 0 | -0.11214035  | 0 | 0            | 0            | 0            |
| 0 | 0           | 0 | -0.10759888  | 0 | 0            | 0            | 0            |
| 0 | 0           | 0 | -0.10888881  | 0 | 0            | 0            | 0            |
| 0 | 0           | 0 | -0.11267879  | 0 | 0            | 0            | 0            |
| 0 | 0.02294053  | 0 | -0.11274086  | 0 | 0            | 0            | 0            |
| 0 | 0           | 0 | 0            | 0 | -0.11132985  | 0            | 0            |
| 0 | 0           | 0 | 0            | 0 | -0.12006853  | 0            | -0.021891467 |
| 0 | 0           | 0 | -0.11349241  | 0 | 0            | 0            | 0            |
| 0 | 0.028474675 | 0 | 0            | 0 | -0.11140923  | 0            | 0            |
| 0 | 0           | 0 | -0.11813706  | 0 | 0            | -0.0123675   | 0            |
| 0 | 0           | 0 | 0            | 0 | -0.12586367  | 0            | 0            |
| 0 | 0           | 0 | 0            | 0 | 0            | 0            | 0            |
| 0 | 0           | 0 | -0.08767277  | 0 | -0.027399222 | 0            | 0            |
| 0 | 0           | 0 | 0            | 0 | -0.10810313  | 0            | 0            |
| 0 | 0           | 0 | 0            | 0 | 0            | 0            | 0            |
| 0 | 0.033289973 | 0 | 0            | 0 | 0            | 0            | 0            |
| 0 | 0           | 0 | 0            | 0 | -0.10635985  | 0            | 0            |
| 0 | 0           | 0 | -0.096698307 | 0 | -0.018006394 | 0            | 0            |
| 0 | 0           | 0 | 0            | 0 | 0            | 0            | 0            |
| 0 | 0           | 0 | 0            | 0 | -0.11157011  | 0            | 0            |
| 0 | 0           | 0 | -0.10153487  | 0 | 0            | 0            | 0            |
| 0 | 0.022647528 | 0 | 0            | 0 | -0.11163805  | 0            | 0            |
| 0 | 0           | 0 | 0            | 0 | -0.11274634  | 0            | 0            |
| 0 | 0           | 0 | 0            | 0 | -0.11624173  | 0            | -0.010253365 |
| 0 | 0.081218147 | 0 | -0.10239623  | 0 | 0            | 0            | 0            |
| 0 | 0           | 0 | 0            | 0 | 0            | 0            | 0            |
| 0 | 0.036622915 | 0 | 0            | 0 | 0            | 0            | 0            |
| 0 | -0.18825873 | 0 | 0            | 0 | 0            | 0            | 0            |
| 0 | 0           | 0 | 0            | 0 | -0.099057772 | 0            | 0            |
| 0 | 0.081613705 | 0 | 0            | 0 | -0.099970139 | 0            | 0            |
| 0 | 0           | 0 | 0            | 0 | 0            | 0            | 0            |
| 0 | -0.18360827 | 0 | 0            | 0 | 0            | 0            | 0            |
| 0 | 0           | 0 | -0.11337482  | 0 | 0            | 0.014326626  | 0            |
| 0 | 0.033737259 | 0 | -0.11354457  | 0 | 0            | 0.014139645  | 0            |
| 0 | -0.22700017 | 0 | -0.12047593  | 0 | 0            | 0            | 0            |
| 0 | 0           | 0 | -0.11263799  | 0 | 0            | 0            | 0            |
| 0 | 0.029370353 | 0 | -0.1127574   | 0 | 0            | 0            | 0            |
| 0 | 0           | 0 | -0.11736152  | 0 | -0.002866605 | 0            | 0            |
| 0 | 0.02967625  | 0 | -0.11736297  | 0 | -0.00295499  | 0            | 0            |
| 0 | 0           | 0 | 0            | 0 | -0.11105973  | 0            | 0.016839244  |
| 0 | 0           | 0 | -0.11208597  | 0 | 0            | 0            | 0            |
| 0 | 0.03454352  | 0 | 0            | 0 | -0.11122509  | 0            | 0.016657192  |

[illegible]

|   |             |   |             |   |              |   |              |   |
|---|-------------|---|-------------|---|--------------|---|--------------|---|
| 0 | 0           | 0 | 0           | 0 | 0            | 0 | 0.021161474  | 0 |
| 0 | 0.045290582 | 0 | 0           | 0 | 0            | 0 | 0.0149589    | 0 |
| 0 | 0           | 0 | 0           | 0 | 0            | 0 | 0            | 0 |
| 0 | -0.17685178 | 0 | 0           | 0 | 0            | 0 | 0            | 0 |
| 0 | -0.2308454  | 0 | 0           | 0 | 0            | 0 | 0            | 0 |
| 0 | 0.041171703 | 0 | 0           | 0 | 0            | 0 | 0.020853817  | 0 |
| 0 | 0.038192938 | 0 | 0           | 0 | 0            | 0 | 0            | 0 |
| 0 | 0           | 0 | 0           | 0 | 0            | 0 | 0.012548544  | 0 |
| 0 | 0.042851111 | 0 | 0           | 0 | 0            | 0 | 0.012270839  | 0 |
| 0 | 0           | 0 | 0           | 0 | 0            | 0 | -0.002342263 | 0 |
| 0 | 0           | 0 | 0           | 0 | 0            | 0 | 0            | 0 |
| 0 | 0           | 0 | 0           | 0 | 0            | 0 | 0.00025152   | 0 |
| 0 | -0.176832   | 0 | 0           | 0 | 0            | 0 | 0            | 0 |
| 0 | 0           | 0 | 0           | 0 | 0            | 0 | 0            | 0 |
| 0 | 0           | 0 | 0           | 0 | 0            | 0 | -0.001448488 | 0 |
| 0 | 0           | 0 | 0           | 0 | 0            | 0 | 0.00912959   | 0 |
| 0 | 0           | 0 | 0           | 0 | 0            | 0 | 0            | 0 |
| 0 | 0.021754506 | 0 | 0           | 0 | 0            | 0 | 0            | 0 |
| 0 | -0.19108333 | 0 | 0           | 0 | 0            | 0 | 0.040829728  | 0 |
| 0 | 0           | 0 | 0           | 0 | 0            | 0 | 0            | 0 |
| 0 | 0           | 0 | 0           | 0 | 0            | 0 | -0.063499519 | 0 |
| 0 | 0           | 0 | 0           | 0 | 0            | 0 | 0            | 0 |
| 0 | 0           | 0 | 0           | 0 | 0            | 0 | -0.068015028 | 0 |
| 0 | 0           | 0 | 0           | 0 | 0            | 0 | 0            | 0 |
| 0 | 0.098644757 | 0 | 0           | 0 | 0            | 0 | 0            | 0 |
| 0 | 0           | 0 | 0           | 0 | 0            | 0 | -0.05975175  | 0 |
| 0 | 0           | 0 | 0           | 0 | 0            | 0 | -0.056925034 | 0 |
| 0 | 0.009203955 | 0 | 0           | 0 | 0            | 0 | -0.056960312 | 0 |
| 0 | 0           | 0 | 0           | 0 | 0            | 0 | 0            | 0 |
| 0 | 0           | 0 | 0           | 0 | 0            | 0 | 0            | 0 |
| 0 | 0.029446692 | 0 | 0           | 0 | 0            | 0 | 0            | 0 |
| 0 | 0           | 0 | -0.11949663 | 0 | 0            | 0 | 0            | 0 |
| 0 | 0           | 0 | -0.10604448 | 0 | 0            | 0 | -0.023964152 | 0 |
| 0 | 0           | 0 | -0.10514479 | 0 | 0            | 0 | 0            | 0 |
| 0 | 0.028023213 | 0 | -0.10521256 | 0 | 0            | 0 | 0            | 0 |
| 0 | 0           | 0 | -0.10025743 | 0 | 0            | 0 | 0            | 0 |
| 0 | 0           | 0 | 0           | 0 | 0            | 0 | 0            | 0 |
| 0 | 0.032156437 | 0 | 0           | 0 | 0            | 0 | 0            | 0 |
| 0 | 0           | 0 | -0.1053076  | 0 | 0            | 0 | 0            | 0 |
| 0 | 0           | 0 | 0           | 0 | -0.11666681  | 0 | 0            | 0 |
| 0 | 0           | 0 | -0.1134641  | 0 | 0.00664652   | 0 | 0            | 0 |
| 0 | 0           | 0 | 0           | 0 | -0.10134654  | 0 | 0            | 0 |
| 0 | 0.028118702 | 0 | 0           | 0 | -0.10141461  | 0 | 0            | 0 |
| 0 | 0           | 0 | 0           | 0 | -0.10203914  | 0 | -0.022927907 | 0 |
| 0 | 0           | 0 | 0           | 0 | 0            | 0 | 0            | 0 |
| 0 | 0           | 0 | 0           | 0 | 0            | 0 | -0.07353548  | 0 |
| 0 | 0           | 0 | 0           | 0 | -0.096141485 | 0 | 0            | 0 |

|   |              |   |              |   |              |   |              |   |
|---|--------------|---|--------------|---|--------------|---|--------------|---|
| 0 | 0            | 0 | 0            | 0 | -0.10154332  | 0 | 0            | 0 |
| 0 | -0.010417792 | 0 | 0            | 0 | 0            | 0 | 0            | 0 |
| 0 | 0            | 0 | -0.079994396 | 0 | 0            | 0 | -0.070311788 | 0 |
| 0 | 0            | 0 | -0.054436501 | 0 | 0            | 0 | -0.067191809 | 0 |
| 0 | 0            | 0 | 0            | 0 | -0.051590336 | 0 | -0.066892263 | 0 |
| 0 | 0            | 0 | 0            | 0 | -0.077674223 | 0 | -0.069724321 | 0 |
| 0 | 0            | 0 | -0.080405802 | 0 | 0            | 0 | -0.046677856 | 0 |
| 0 | 0            | 0 | 0            | 0 | 0            | 0 | -0.077992979 | 0 |
| 0 | 0            | 0 | 0            | 0 | -0.077259868 | 0 | -0.04514417  | 0 |
| 0 | 0            | 0 | 0            | 0 | 0            | 0 | -0.068605552 | 0 |
| 0 | 0            | 0 | -0.076162253 | 0 | 0            | 0 | -0.071861804 | 0 |
| 0 | 0            | 0 | -0.086285456 | 0 | 0            | 0 | -0.051245725 | 0 |
| 0 | 0            | 0 | 0            | 0 | -0.074167127 | 0 | -0.071253325 | 0 |
| 0 | 0            | 0 | -0.088911997 | 0 | 0            | 0 | -0.045564157 | 0 |
| 0 | 0.013526784  | 0 | -0.089026086 | 0 | 0            | 0 | -0.045867912 | 0 |
| 0 | 0            | 0 | -0.077740585 | 0 | 0            | 0 | -0.066734601 | 0 |
| 0 | 0            | 0 | -0.089071847 | 0 | 0            | 0 | -0.046889623 | 0 |
| 0 | 0            | 0 | 0            | 0 | 0            | 0 | -0.070680575 | 0 |
| 0 | 0            | 0 | -0.096465507 | 0 | 0.006579297  | 0 | -0.048270069 | 0 |
| 0 | 0            | 0 | 0            | 0 | 0            | 0 | -0.068150235 | 0 |
| 0 | 0.002522435  | 0 | 0            | 0 | 0            | 0 | -0.068524007 | 0 |
| 0 | 0            | 0 | -0.081646205 | 0 | 0            | 0 | -0.065057656 | 0 |
| 0 | 0.003773036  | 0 | -0.081714341 | 0 | 0            | 0 | -0.065458707 | 0 |
| 0 | 0            | 0 | -0.070387161 | 0 | -0.011890737 | 0 | -0.066261586 | 0 |
| 0 | 0            | 0 | 0            | 0 | -0.075828121 | 0 | -0.066220586 | 0 |
| 0 | 0            | 0 | 0            | 0 | -0.08343066  | 0 | -0.04953312  | 0 |
| 0 | 0            | 0 | 0            | 0 | -0.086215324 | 0 | -0.04380384  | 0 |
| 0 | 0            | 0 | 0            | 0 | -0.079870787 | 0 | -0.064479904 | 0 |
| 0 | 0.014160716  | 0 | 0            | 0 | -0.086324854 | 0 | -0.044105103 | 0 |
| 0 | 0.00386018   | 0 | 0            | 0 | -0.079939206 | 0 | -0.064878919 | 0 |
| 0 | 0            | 0 | -0.054293156 | 0 | 0            | 0 | 0            | 0 |
| 0 | 0            | 0 | 0            | 0 | -0.086595043 | 0 | -0.045550507 | 0 |
| 0 | 0            | 0 | 0            | 0 | -0.051472289 | 0 | 0            | 0 |
| 0 | 0            | 0 | -0.071810455 | 0 | 0            | 0 | 0            | 0 |
| 0 | 0.035578542  | 0 | -0.071956302 | 0 | 0            | 0 | 0            | 0 |
| 0 | 0            | 0 | -0.069723054 | 0 | 0            | 0 | 0            | 0 |
| 0 | 0            | 0 | 0            | 0 | -0.069648217 | 0 | 0            | 0 |
| 0 | 0            | 0 | -0.068492548 | 0 | 0            | 0 | 0            | 0 |
| 0 | 0.070805758  | 0 | -0.070453508 | 0 | 0            | 0 | 0            | 0 |
| 0 | 0.035651612  | 0 | 0            | 0 | -0.06980232  | 0 | 0            | 0 |
| 0 | 0            | 0 | 0            | 0 | -0.067426232 | 0 | 0            | 0 |
| 0 | 0            | 0 | 0            | 0 | -0.066413438 | 0 | 0            | 0 |
| 0 | 0.070741473  | 0 | 0            | 0 | -0.068206484 | 0 | 0            | 0 |
| 0 | 0            | 0 | -0.076470232 | 0 | 0            | 0 | 0            | 0 |
| 0 | 0            | 0 | 0            | 0 | 0            | 0 | 0            | 0 |
| 0 | 0            | 0 | -0.075768977 | 0 | 0            | 0 | 0            | 0 |
| 0 | 0            | 0 | -0.078984913 | 0 | 0.003407833  | 0 | 0            | 0 |



|   |             |   |              |   |              |   |              |
|---|-------------|---|--------------|---|--------------|---|--------------|
| 0 | 0           | 0 | -0.07913534  | 0 | 0            | 0 | 0            |
| 0 | 0.11198632  | 0 | 0            | 0 | 0            | 0 | 0            |
| 0 | 0.02773529  | 0 | -0.079207816 | 0 | 0            | 0 | 0            |
| 0 | 0           | 0 | 0            | 0 | 0            | 0 | 0            |
| 0 | 0           | 0 | -0.056799528 | 0 | 0            | 0 | 0            |
| 0 | 0           | 0 | -0.0552421   | 0 | 0            | 0 | 0            |
| 0 | 0           | 0 | 0            | 0 | -0.074572393 | 0 | 0            |
| 0 | 0.026824792 | 0 | 0            | 0 | 0            | 0 | 0            |
| 0 | 0.023633919 | 0 | -0.056803115 | 0 | 0            | 0 | 0            |
| 0 | 0           | 0 | 0            | 0 | -0.073946502 | 0 | 0            |
| 0 | -0.21706285 | 0 | -0.084569181 | 0 | 0            | 0 | 0            |
| 0 | 0           | 0 | 0            | 0 | -0.054656746 | 0 | 0            |
| 0 | 0           | 0 | 0            | 0 | -0.05287259  | 0 | 0            |
| 0 | 0           | 0 | -0.081325315 | 0 | 0            | 0 | 0            |
| 0 | 0.023595791 | 0 | 0            | 0 | -0.054678353 | 0 | 0            |
| 0 | 0           | 0 | 0            | 0 | -0.07726615  | 0 | 0            |
| 0 | 0.026977498 | 0 | -0.081372574 | 0 | 0            | 0 | 0            |
| 0 | 0           | 0 | 0            | 0 | 0            | 0 | -0.067199441 |
| 0 | 0           | 0 | 0            | 0 | 0            | 0 | -0.081887256 |
| 0 | 0           | 0 | -0.057585274 | 0 | 0            | 0 | 0            |
| 0 | 0.027803753 | 0 | 0            | 0 | -0.077343178 | 0 | 0            |
| 0 | 0           | 0 | 0            | 0 | 0            | 0 | 0            |
| 0 | 0           | 0 | -0.076869077 | 0 | -0.007588458 | 0 | 0            |
| 0 | 0           | 0 | -0.058967571 | 0 | 0.001336808  | 0 | 0            |
| 0 | 0.02756838  | 0 | -0.076851382 | 0 | -0.007675381 | 0 | 0            |
| 0 | 0           | 0 | -0.080669667 | 0 | 0            | 0 | 0            |
| 0 | 0           | 0 | -0.084415769 | 0 | 0.003499305  | 0 | 0            |
| 0 | -0.21620189 | 0 | 0            | 0 | -0.082981363 | 0 | 0            |
| 0 | 0           | 0 | 0            | 0 | 0            | 0 | 0            |
| 0 | 0.078428736 | 0 | 0            | 0 | 0            | 0 | -0.067777097 |
| 0 | 0           | 0 | 0            | 0 | -0.079561688 | 0 | 0            |
| 0 | 0           | 0 | -0.068505097 | 0 | 0            | 0 | 0            |
| 0 | 0           | 0 | 0            | 0 | -0.055597598 | 0 | 0            |
| 0 | 0.02684752  | 0 | 0            | 0 | -0.079614016 | 0 | 0            |
| 0 | 0.069769029 | 0 | -0.069184249 | 0 | 0            | 0 | 0            |
| 0 | 0           | 0 | -0.081063098 | 0 | 0            | 0 | 0            |
| 0 | 0           | 0 | -0.069965173 | 0 | -0.013406754 | 0 | 0            |
| 0 | 0           | 0 | 0            | 0 | -0.066641078 | 0 | 0            |
| 0 | 0           | 0 | 0            | 0 | -0.078849618 | 0 | 0            |
| 0 | 0           | 0 | -0.077631531 | 0 | -0.006890223 | 0 | 0            |
| 0 | 0.069114977 | 0 | 0            | 0 | -0.067370974 | 0 | 0            |
| 0 | 0           | 0 | 0            | 0 | -0.079373681 | 0 | 0            |
| 0 | 0           | 0 | 0            | 0 | 0            | 0 | -0.041660963 |
| 0 | 0.09511449  | 0 | 0            | 0 | 0            | 0 | -0.041993246 |
| 0 | 0           | 0 | 0            | 0 | 0            | 0 | 0            |
| 0 | 0.045913809 | 0 | 0            | 0 | 0            | 0 | 0            |
| 0 | 0           | 0 | 0            | 0 | 0            | 0 | 0            |

|   |             |   |              |   |              |              |   |
|---|-------------|---|--------------|---|--------------|--------------|---|
| 0 | 0           | 0 | -0.078255336 | 0 | 0            | 0            | 0 |
| 0 | 0.043791702 | 0 | 0            | 0 | 0            | 0            | 0 |
| 0 | -0.21324802 | 0 | -0.083362351 | 0 | 0            | 0            | 0 |
| 0 | 0           | 0 | 0            | 0 | 0            | 0            | 0 |
| 0 | 0.028136504 | 0 | -0.078355126 | 0 | 0            | 0            | 0 |
| 0 | 0.020608736 | 0 | 0            | 0 | 0            | 0            | 0 |
| 0 | 0           | 0 | 0            | 0 | 0            | 0            | 0 |
| 0 | 0           | 0 | 0            | 0 | 0            | -0.070976726 | 0 |
| 0 | 0           | 0 | 0            | 0 | 0            | -0.034839555 | 0 |
| 0 | 0.009304893 | 0 | 0            | 0 | 0            | -0.071343257 | 0 |
| 0 | 0           | 0 | 0            | 0 | -0.076840987 | 0            | 0 |
| 0 | 0           | 0 | 0            | 0 | 0            | -0.029526131 | 0 |
| 0 | 0           | 0 | -0.063324299 | 0 | -0.020270533 | 0            | 0 |
| 0 | -0.21240711 | 0 | 0            | 0 | -0.082053951 | 0            | 0 |
| 0 | 0.034756728 | 0 | 0            | 0 | 0            | -0.035167485 | 0 |
| 0 | 0.028055073 | 0 | 0            | 0 | -0.076945761 | 0            | 0 |
| 0 | 0.025706962 | 0 | -0.063272782 | 0 | -0.020371994 | 0            | 0 |
| 0 | 0           | 0 | 0            | 0 | 0            | 0            | 0 |
| 0 | -0.19918849 | 0 | 0            | 0 | 0            | 0            | 0 |
| 0 | 0           | 0 | 0            | 0 | 0            | 0            | 0 |
| 0 | 0.08875102  | 0 | 0            | 0 | 0            | 0            | 0 |
| 0 | 0.046094121 | 0 | 0            | 0 | 0            | 0            | 0 |
| 0 | 0           | 0 | 0            | 0 | 0            | 0            | 0 |
| 0 | 0           | 0 | 0            | 0 | 0            | -0.076576776 | 0 |
| 0 | 0           | 0 | -0.0800511   | 0 | 0            | 0            | 0 |
| 0 | 0           | 0 | -0.061132672 | 0 | -0.020348235 | 0            | 0 |
| 0 | 0           | 0 | -0.063744276 | 0 | -0.019239046 | 0            | 0 |
| 0 | 0           | 0 | 0            | 0 | 0            | -0.047875758 | 0 |
| 0 | 0           | 0 | 0            | 0 | -0.078735039 | 0            | 0 |
| 0 | 0           | 0 | 0            | 0 | 0            | 0            | 0 |
| 0 | 0           | 0 | 0            | 0 | 0            | -0.043273342 | 0 |
| 0 | 0           | 0 | -0.086682259 | 0 | 0            | 0            | 0 |
| 0 | 0.1000781   | 0 | 0            | 0 | 0            | 0            | 0 |
| 0 | 0           | 0 | 0            | 0 | 0            | 0            | 0 |
| 0 | -0.20197156 | 0 | 0            | 0 | 0            | 0            | 0 |
| 0 | 0.094705907 | 0 | -0.087603931 | 0 | 0            | 0            | 0 |
| 0 | 0           | 0 | 0            | 0 | 0            | 0            | 0 |
| 0 | 0           | 0 | -0.13940877  | 0 | 0            | 0            | 0 |
| 0 | 0           | 0 | 0            | 0 | 0            | 0            | 0 |
| 0 | 0           | 0 | 0            | 0 | 0            | -0.06618389  | 0 |
| 0 | 0           | 0 | -0.087842351 | 0 | 0            | 0            | 0 |
| 0 | 0.013988554 | 0 | 0            | 0 | 0            | -0.066572622 | 0 |
| 0 | 0           | 0 | 0            | 0 | -0.085105609 | 0            | 0 |
| 0 | -0.20234991 | 0 | 0            | 0 | 0            | 0            | 0 |
| 0 | 0.096815621 | 0 | 0            | 0 | 0            | 0            | 0 |
| 0 | 0.086831804 | 0 | -0.088704077 | 0 | 0            | 0            | 0 |
| 0 | 0           | 0 | 0            | 0 | 0            | 0            | 0 |

|   |             |   |             |   |              |   |              |   |
|---|-------------|---|-------------|---|--------------|---|--------------|---|
| 0 | 0.094939653 | 0 | 0           | 0 | -0.086067775 | 0 | 0            | 0 |
| 0 | 0.046055233 | 0 | 0           | 0 | 0            | 0 | 0            | 0 |
| 0 | 0           | 0 | 0           | 0 | 0            | 0 | -0.034398834 | 0 |
| 0 | 0           | 0 | -0.14091866 | 0 | 0            | 0 | 0            | 0 |
| 0 | 0.02886748  | 0 | -0.14106925 | 0 | 0            | 0 | 0            | 0 |
| 0 | 0           | 0 | 0           | 0 | -0.13782229  | 0 | 0            | 0 |
| 0 | 0           | 0 | 0           | 0 | -0.085718603 | 0 | 0            | 0 |
| 0 | 0.087075017 | 0 | 0           | 0 | -0.086627115 | 0 | 0            | 0 |
| 0 | 0           | 0 | -0.142274   | 0 | 0            | 0 | 0            | 0 |
| 0 | 0           | 0 | 0           | 0 | 0            | 0 | -0.021330086 | 0 |
| 0 | 0           | 0 | 0           | 0 | -0.13948429  | 0 | 0            | 0 |
| 0 | 0           | 0 | -0.10394849 | 0 | -0.040835715 | 0 | 0            | 0 |
| 0 | 0           | 0 | -0.14370573 | 0 | 0            | 0 | -0.00926923  | 0 |
| 0 | 0.030275779 | 0 | 0           | 0 | 0            | 0 | -0.02155598  | 0 |
| 0 | 0.028697271 | 0 | 0           | 0 | -0.13964045  | 0 | 0            | 0 |
| 0 | -0.19761147 | 0 | 0           | 0 | 0            | 0 | 0            | 0 |
| 0 | 0           | 0 | 0           | 0 | 0            | 0 | 0            | 0 |
| 0 | -0.17244135 | 0 | 0           | 0 | 0            | 0 | -0.066651994 | 0 |
| 0 | 0.036448208 | 0 | 0           | 0 | 0            | 0 | 0            | 0 |
| 0 | 0           | 0 | 0           | 0 | 0            | 0 | 0            | 0 |
| 0 | -0.13624021 | 0 | 0           | 0 | 0            | 0 | 0            | 0 |
| 0 | 0           | 0 | 0           | 0 | 0            | 0 | -0.043358606 | 0 |
| 0 | 0           | 0 | 0           | 0 | 0            | 0 | -0.026006812 | 0 |
| 0 | 0.09599533  | 0 | 0           | 0 | 0            | 0 | 0            | 0 |
| 0 | 0           | 0 | 0           | 0 | -0.14083588  | 0 | 0            | 0 |
| 0 | 0           | 0 | 0           | 0 | -0.14219145  | 0 | -0.008166866 | 0 |
| 0 | 0           | 0 | 0           | 0 | 0            | 0 | 0            | 0 |
| 0 | 0           | 0 | -0.12403511 | 0 | 0            | 0 | 0            | 0 |
| 0 | 0           | 0 | 0           | 0 | 0            | 0 | -0.029516752 | 0 |
| 0 | 0           | 0 | -0.11588553 | 0 | 0            | 0 | -0.033910263 | 0 |
| 0 | 0.026107579 | 0 | 0           | 0 | 0            | 0 | -0.029842928 | 0 |
| 0 | 0           | 0 | 0           | 0 | 0            | 0 | 0            | 0 |
| 0 | 0           | 0 | 0           | 0 | -0.11452268  | 0 | -0.032372146 | 0 |
| 0 | 0           | 0 | -0.11224102 | 0 | 0            | 0 | -0.0214854   | 0 |
| 0 | 0           | 0 | -0.12679653 | 0 | 0            | 0 | 0            | 0 |
| 0 | -0.18330625 | 0 | 0           | 0 | 0            | 0 | -0.03812181  | 0 |
| 0 | 0           | 0 | -0.11821969 | 0 | 0            | 0 | -0.018810395 | 0 |
| 0 | 0.020211057 | 0 | -0.12696218 | 0 | 0            | 0 | 0            | 0 |
| 0 | 0           | 0 | 0           | 0 | -0.12079621  | 0 | 0            | 0 |
| 0 | 0.022712907 | 0 | -0.11841288 | 0 | 0            | 0 | -0.019152282 | 0 |
| 0 | -0.19588201 | 0 | 0           | 0 | 0            | 0 | 0            | 0 |
| 0 | -0.21844061 | 0 | -0.1124339  | 0 | 0            | 0 | 0            | 0 |
| 0 | 0           | 0 | -0.12045977 | 0 | 0            | 0 | -0.022541535 | 0 |
| 0 | 0           | 0 | -0.11165483 | 0 | -0.017817646 | 0 | 0            | 0 |
| 0 | 0           | 0 | -0.12884998 | 0 | 0            | 0 | -0.000439994 | 0 |
| 0 | 0           | 0 | -0.1117637  | 0 | 0            | 0 | 0            | 0 |
| 0 | 0           | 0 | -0.10732437 | 0 | 0            | 0 | 0            | 0 |

|   |             |   |              |   |              |   |              |   |
|---|-------------|---|--------------|---|--------------|---|--------------|---|
| 0 | 0           | 0 | -0.094403978 | 0 | -0.027777484 | 0 | -0.023189881 | 0 |
| 0 | 0           | 0 | -0.087546186 | 0 | -0.025382756 | 0 | 0            | 0 |
| 0 | 0.026488483 | 0 | -0.11183174  | 0 | 0            | 0 | 0            | 0 |
| 0 | 0.028432647 | 0 | -0.087517748 | 0 | -0.025490775 | 0 | 0            | 0 |
| 0 | 0           | 0 | 0            | 0 | -0.11698399  | 0 | -0.01749789  | 0 |
| 0 | -0.21869325 | 0 | -0.11304844  | 0 | 0            | 0 | 0            | 0 |
| 0 | 0.023017048 | 0 | 0            | 0 | -0.11717863  | 0 | -0.017838176 | 0 |
| 0 | 0           | 0 | -0.095926467 | 0 | -0.012145527 | 0 | 0            | 0 |
| 0 | -0.217325   | 0 | 0            | 0 | -0.11169559  | 0 | 0            | 0 |
| 0 | 0           | 0 | 0            | 0 | -0.11010901  | 0 | -0.01912644  | 0 |
| 0 | 0           | 0 | -0.087082123 | 0 | -0.022646943 | 0 | 0            | 0 |
| 0 | 0           | 0 | -0.11565275  | 0 | 0            | 0 | -0.008471694 | 0 |
| 0 | 0.019462661 | 0 | -0.11584302  | 0 | 0            | 0 | -0.008825711 | 0 |
| 0 | 0           | 0 | 0            | 0 | -0.12375879  | 0 | 0            | 0 |
| 0 | 0           | 0 | -0.097282716 | 0 | -0.015962334 | 0 | 0            | 0 |
| 0 | 0.02022175  | 0 | 0            | 0 | -0.12392846  | 0 | 0            | 0 |
| 0 | 0.022829367 | 0 | -0.097214664 | 0 | -0.016097471 | 0 | 0            | 0 |
| 0 | 0           | 0 | 0            | 0 | -0.11924511  | 0 | -0.021298091 | 0 |
| 0 | 0           | 0 | 0            | 0 | -0.11098961  | 0 | 0            | 0 |
| 0 | 0           | 0 | 0            | 0 | -0.10643936  | 0 | 0            | 0 |
| 0 | -0.18648153 | 0 | 0            | 0 | 0            | 0 | 0            | 0 |
| 0 | 0.026650689 | 0 | 0            | 0 | -0.11105828  | 0 | 0            | 0 |
| 0 | 0           | 0 | -0.089749316 | 0 | -0.024585361 | 0 | 0            | 0 |
| 0 | 0           | 0 | -0.10290269  | 0 | -0.015750633 | 0 | -0.012256955 | 0 |
| 0 | 0           | 0 | 0            | 0 | -0.12586722  | 0 | 0.000773314  | 0 |
| 0 | 0           | 0 | -0.096339353 | 0 | 0            | 0 | 0.01214829   | 0 |
| 0 | -0.21753371 | 0 | 0            | 0 | -0.11193796  | 0 | 0            | 0 |
| 0 | -0.23080762 | 0 | -0.10185387  | 0 | 0            | 0 | 0            | 0 |
| 0 | 0           | 0 | -0.095436246 | 0 | 0            | 0 | 0            | 0 |
| 0 | 0           | 0 | 0            | 0 | -0.11369149  | 0 | -0.006291601 | 0 |
| 0 | 0.083130682 | 0 | -0.097256367 | 0 | 0            | 0 | 0.012025463  | 0 |
| 0 | 0.020030835 | 0 | 0            | 0 | -0.11388014  | 0 | -0.006642239 | 0 |
| 0 | 0           | 0 | -0.11978131  | 0 | 0.019194984  | 0 | 0            | 0 |
| 0 | 0.080051157 | 0 | -0.096358971 | 0 | 0            | 0 | 0            | 0 |
| 0 | -0.18941461 | 0 | 0            | 0 | 0            | 0 | 0            | 0 |
| 0 | 0.081922978 | 0 | -0.11963781  | 0 | 0.018136643  | 0 | 0            | 0 |
| 0 | 0           | 0 | 0            | 0 | -0.093286834 | 0 | 0.014551136  | 0 |
| 0 | 0           | 0 | 0            | 0 | -0.091476791 | 0 | 0            | 0 |
| 0 | -0.22953857 | 0 | 0            | 0 | -0.099379166 | 0 | 0            | 0 |
| 0 | 0.083706361 | 0 | 0            | 0 | -0.094248871 | 0 | 0.014437191  | 0 |
| 0 | 0.079987245 | 0 | 0            | 0 | -0.092452072 | 0 | 0            | 0 |
| 0 | -0.22689393 | 0 | -0.11373213  | 0 | 0            | 0 | 0.014323171  | 0 |
| 0 | -0.23588618 | 0 | -0.11269714  | 0 | 0            | 0 | 0            | 0 |
| 0 | 0           | 0 | -0.11268844  | 0 | 0            | 0 | 0.012981149  | 0 |
| 0 | 0           | 0 | -0.10558801  | 0 | -0.008053711 | 0 | 0.014405825  | 0 |
| 0 | 0.033260663 | 0 | -0.11280415  | 0 | 0            | 0 | 0.012685261  | 0 |
| 0 | 0.033719309 | 0 | -0.10574551  | 0 | -0.008073632 | 0 | 0.014216017  | 0 |

|   |             |   |              |   |              |   |              |   |
|---|-------------|---|--------------|---|--------------|---|--------------|---|
| 0 | -0.22702846 | 0 | -0.11754672  | 0 | -0.003043678 | 0 | 0            | 0 |
| 0 | 0           | 0 | -0.10716103  | 0 | -0.005662825 | 0 | 0            | 0 |
| 0 | 0           | 0 | 0            | 0 | 0            | 0 | 0            | 0 |
| 0 | 0.029340833 | 0 | -0.10720119  | 0 | -0.005744722 | 0 | 0            | 0 |
| 0 | -0.22599327 | 0 | 0            | 0 | -0.11141694  | 0 | 0.016841651  | 0 |
| 0 | -0.23717037 | 0 | 0            | 0 | -0.10954811  | 0 | 0            | 0 |
| 0 | 0           | 0 | 0            | 0 | -0.10968659  | 0 | 0.014044425  | 0 |
| 0 | 0.16975383  | 0 | 0            | 0 | 0            | 0 | 0            | 0 |
| 0 | 0           | 0 | -0.11238669  | 0 | 0            | 0 | 0.004205821  | 0 |
| 0 | 0.033588887 | 0 | 0            | 0 | -0.10980107  | 0 | 0.013751252  | 0 |
| 0 | 0           | 0 | -0.10814451  | 0 | -0.004089589 | 0 | 0            | 0 |
| 0 | 0           | 0 | -0.11025309  | 0 | -0.00561118  | 0 | 0.009859212  | 0 |
| 0 | 0           | 0 | -0.10623492  | 0 | -0.008891054 | 0 | 0.006414614  | 0 |
| 0 | 0           | 0 | 0            | 0 | 0            | 0 | -0.020507212 | 0 |
| 0 | 0           | 0 | 0            | 0 | 0            | 0 | 0            | 0 |
| 0 | -0.19742237 | 0 | 0            | 0 | 0            | 0 | 0            | 0 |
| 0 | 0.1505088   | 0 | 0            | 0 | 0            | 0 | -0.020364512 | 0 |
| 0 | 0           | 0 | 0            | 0 | -0.10942036  | 0 | 0.005352083  | 0 |
| 0 | 0.14382366  | 0 | 0            | 0 | 0            | 0 | 0            | 0 |
| 0 | -0.19723495 | 0 | 0            | 0 | 0            | 0 | 0            | 0 |
| 0 | 0           | 0 | 0            | 0 | 0            | 0 | 0            | 0 |
| 0 | 0           | 0 | 0            | 0 | 0            | 0 | -0.005287517 | 0 |
| 0 | 0.14129438  | 0 | 0            | 0 | 0            | 0 | 0            | 0 |
| 0 | 0.1379296   | 0 | 0            | 0 | 0            | 0 | -0.005312873 | 0 |
| 0 | 0           | 0 | -0.098690798 | 0 | 0            | 0 | -0.058152145 | 0 |
| 0 | 0           | 0 | 0            | 0 | -0.095923293 | 0 | -0.057486414 | 0 |
| 0 | -0.23638161 | 0 | 0            | 0 | 0            | 0 | 0            | 0 |
| 0 | 0           | 0 | 0            | 0 | 0            | 0 | 0.009135231  | 0 |
| 0 | 0           | 0 | -0.077566771 | 0 | 0            | 0 | -0.054971568 | 0 |
| 0 | 0.1260903   | 0 | 0            | 0 | 0            | 0 | 0.009035452  | 0 |
| 0 | 0           | 0 | 0            | 0 | -0.074563993 | 0 | -0.054556422 | 0 |
| 0 | 0           | 0 | -0.077931976 | 0 | 0            | 0 | 0            | 0 |
| 0 | -0.20724007 | 0 | 0            | 0 | 0            | 0 | 0.02990617   | 0 |
| 0 | 0           | 0 | 0            | 0 | 0            | 0 | -0.063338226 | 0 |
| 0 | 0           | 0 | 0            | 0 | -0.074690893 | 0 | 0            | 0 |
| 0 | 0           | 0 | -0.095202265 | 0 | 0            | 0 | -0.058996229 | 0 |
| 0 | 0           | 0 | -0.090322499 | 0 | 0            | 0 | 0            | 0 |
| 0 | 0           | 0 | 0            | 0 | -0.092920337 | 0 | -0.058268309 | 0 |
| 0 | 0           | 0 | 0            | 0 | -0.087709387 | 0 | 0            | 0 |
| 0 | 0           | 0 | -0.084479629 | 0 | -0.01649867  | 0 | -0.053852287 | 0 |
| 0 | 0           | 0 | -0.099283578 | 0 | 0            | 0 | -0.054139878 | 0 |
| 0 | 0           | 0 | -0.10032693  | 0 | 0            | 0 | -0.053431186 | 0 |
| 0 | 0.002191866 | 0 | -0.10033457  | 0 | 0            | 0 | -0.053478146 | 0 |
| 0 | 0           | 0 | -0.10062288  | 0 | 0            | 0 | 0            | 0 |
| 0 | 0.021189339 | 0 | -0.10062645  | 0 | 0            | 0 | 0            | 0 |
| 0 | 0           | 0 | 0            | 0 | -0.096961786 | 0 | -0.053534833 | 0 |
| 0 | 0           | 0 | 0            | 0 | -0.098189048 | 0 | -0.052769873 | 0 |



|   |              |   |              |   |              |   |              |   |
|---|--------------|---|--------------|---|--------------|---|--------------|---|
| 0 | 0            | 0 | 0            | 0 | 0            | 0 | 0.0083948    | 0 |
| 0 | 0.036723956  | 0 | 0            | 0 | 0            | 0 | 0            | 0 |
| 0 | 0.037792808  | 0 | 0            | 0 | 0            | 0 | 0.008078852  | 0 |
| 0 | 0            | 0 | 0            | 0 | 0            | 0 | 0.007149563  | 0 |
| 0 | 0.041839374  | 0 | 0            | 0 | 0            | 0 | 0.006846573  | 0 |
| 0 | 0            | 0 | 0            | 0 | 0            | 0 | 0.015284445  | 0 |
| 0 | -0.18096989  | 0 | 0            | 0 | 0            | 0 | 0.01545113   | 0 |
| 0 | -0.18230017  | 0 | 0            | 0 | 0            | 0 | 0.021317962  | 0 |
| 0 | 0.042207974  | 0 | 0            | 0 | 0            | 0 | 0.014995001  | 0 |
| 0 | -0.17633833  | 0 | 0            | 0 | 0            | 0 | 0            | 0 |
| 0 | -0.22427272  | 0 | 0            | 0 | 0            | 0 | 0.011957951  | 0 |
| 0 | 0            | 0 | 0            | 0 | 0            | 0 | -0.071989906 | 0 |
| 0 | 0            | 0 | 0            | 0 | 0            | 0 | -0.000500076 | 0 |
| 0 | 0            | 0 | 0            | 0 | 0            | 0 | 0            | 0 |
| 0 | 0.014396946  | 0 | 0            | 0 | 0            | 0 | 0            | 0 |
| 0 | 0            | 0 | 0            | 0 | 0            | 0 | 0            | 0 |
| 0 | 0            | 0 | 0            | 0 | 0            | 0 | -0.057272328 | 0 |
| 0 | 0.079927114  | 0 | 0            | 0 | 0            | 0 | -0.057480464 | 0 |
| 0 | 0            | 0 | 0            | 0 | 0            | 0 | 0            | 0 |
| 0 | 0.039622205  | 0 | 0            | 0 | 0            | 0 | 0            | 0 |
| 0 | 0            | 0 | 0            | 0 | 0            | 0 | 0            | 0 |
| 0 | 0.043913357  | 0 | 0            | 0 | 0            | 0 | 0            | 0 |
| 0 | 0            | 0 | 0            | 0 | 0            | 0 | 0            | 0 |
| 0 | 0.09800955   | 0 | 0            | 0 | 0            | 0 | 0            | 0 |
| 0 | -0.023007012 | 0 | 0            | 0 | 0            | 0 | 0            | 0 |
| 0 | 0            | 0 | 0            | 0 | 0            | 0 | -0.06127335  | 0 |
| 0 | 0.009012046  | 0 | 0            | 0 | 0            | 0 | -0.061305741 | 0 |
| 0 | 0            | 0 | 0            | 0 | 0            | 0 | 0            | 0 |
| 0 | 0            | 0 | 0            | 0 | 0            | 0 | -0.067025777 | 0 |
| 0 | 0            | 0 | 0            | 0 | 0            | 0 | 0            | 0 |
| 0 | -0.024204602 | 0 | 0            | 0 | 0            | 0 | 0            | 0 |
| 0 | 0.096805987  | 0 | 0            | 0 | 0            | 0 | 0            | 0 |
| 0 | 0            | 0 | -0.11572065  | 0 | 0            | 0 | 0            | 0 |
| 0 | 0            | 0 | 0            | 0 | 0            | 0 | -0.056526212 | 0 |
| 0 | 0.013121808  | 0 | 0            | 0 | 0            | 0 | -0.056584067 | 0 |
| 0 | 0            | 0 | 0            | 0 | -0.1131296   | 0 | 0            | 0 |
| 0 | -0.008162039 | 0 | 0            | 0 | 0            | 0 | -0.056923194 | 0 |
| 0 | 0            | 0 | -0.090896912 | 0 | 0            | 0 | 0            | 0 |
| 0 | 0.070746811  | 0 | -0.091516351 | 0 | 0            | 0 | 0            | 0 |
| 0 | -0.009270058 | 0 | 0            | 0 | 0            | 0 | 0            | 0 |
| 0 | 0            | 0 | -0.12028506  | 0 | 0            | 0 | -0.028375802 | 0 |
| 0 | 0            | 0 | -0.050363105 | 0 | 0            | 0 | -0.071493525 | 0 |
| 0 | 0            | 0 | -0.11753909  | 0 | 0            | 0 | 0            | 0 |
| 0 | 0.027939333  | 0 | -0.11765249  | 0 | 0            | 0 | 0            | 0 |
| 0 | 0            | 0 | 0            | 0 | -0.046600888 | 0 | -0.071237282 | 0 |
| 0 | 0            | 0 | 0            | 0 | -0.086333445 | 0 | 0            | 0 |
| 0 | 0            | 0 | -0.063303596 | 0 | 0            | 0 | -0.074113588 | 0 |

|   |             |   |              |   |              |   |              |
|---|-------------|---|--------------|---|--------------|---|--------------|
| 0 | 0           | 0 | -0.096318689 | 0 | 0            | 0 | 0            |
| 0 | 0.032698741 | 0 | -0.096486176 | 0 | 0            | 0 | 0            |
| 0 | 0.071092003 | 0 | 0            | 0 | -0.086988198 | 0 | 0            |
| 0 | 0           | 0 | -0.11826163  | 0 | 0            | 0 | 0            |
| 0 | 0           | 0 | -0.098787947 | 0 | 0            | 0 | -0.02490725  |
| 0 | 0           | 0 | -0.10473365  | 0 | 0            | 0 | -0.019171962 |
| 0 | 0.022014401 | 0 | -0.10479927  | 0 | 0            | 0 | -0.019412669 |
| 0 | 0           | 0 | 0            | 0 | -0.060418909 | 0 | -0.073736035 |
| 0 | 0           | 0 | -0.10299861  | 0 | 0            | 0 | -0.026640746 |
| 0 | 0           | 0 | 0            | 0 | -0.11708313  | 0 | -0.027206363 |
| 0 | 0           | 0 | -0.11148478  | 0 | -0.008411977 | 0 | 0            |
| 0 | -0.1456568  | 0 | -0.10521738  | 0 | 0            | 0 | 0            |
| 0 | 0           | 0 | -0.11794539  | 0 | 0.012312997  | 0 | -0.024121846 |
| 0 | 0           | 0 | 0            | 0 | -0.11462245  | 0 | 0            |
| 0 | 0           | 0 | -0.1132747   | 0 | 0.008409574  | 0 | 0            |
| 0 | 0.027951894 | 0 | 0            | 0 | -0.11473795  | 0 | 0            |
| 0 | 0.028065501 | 0 | -0.11331615  | 0 | 0.008382395  | 0 | 0            |
| 0 | 0           | 0 | 0            | 0 | -0.092040312 | 0 | 0            |
| 0 | 0.032970919 | 0 | 0            | 0 | -0.092215642 | 0 | 0            |
| 0 | 0           | 0 | -0.11244895  | 0 | 0.012691938  | 0 | 0            |
| 0 | 0           | 0 | -0.10026737  | 0 | 0            | 0 | 0            |
| 0 | 0           | 0 | 0            | 0 | -0.11533402  | 0 | 0            |
| 0 | 0           | 0 | 0            | 0 | -0.094344616 | 0 | -0.023998894 |
| 0 | 0           | 0 | 0            | 0 | -0.10072363  | 0 | -0.018054287 |
| 0 | 0.022478103 | 0 | 0            | 0 | -0.10078702  | 0 | -0.018295078 |
| 0 | -0.01784073 | 0 | 0            | 0 | 0            | 0 | 0            |
| 0 | 0           | 0 | -0.11400812  | 0 | 0.009030971  | 0 | 0            |
| 0 | 0           | 0 | 0            | 0 | -0.098894609 | 0 | -0.025566125 |
| 0 | -0.14701819 | 0 | 0            | 0 | -0.10143375  | 0 | 0            |
| 0 | 0           | 0 | 0            | 0 | 0            | 0 | -0.074716752 |
| 0 | 0           | 0 | 0            | 0 | 0            | 0 | -0.074493844 |
| 0 | 0           | 0 | 0            | 0 | 0            | 0 | -0.072630732 |
| 0 | 0.002159463 | 0 | 0            | 0 | 0            | 0 | -0.073010004 |
| 0 | 0           | 0 | 0            | 0 | -0.096193986 | 0 | 0            |
| 0 | 0           | 0 | -0.074433239 | 0 | 0            | 0 | -0.075620679 |
| 0 | 0           | 0 | -0.052139511 | 0 | 0            | 0 | -0.066837847 |
| 0 | 0           | 0 | 0            | 0 | -0.07185648  | 0 | -0.075026999 |
| 0 | 0           | 0 | 0            | 0 | -0.049001764 | 0 | -0.066574291 |
| 0 | 0           | 0 | -0.054449497 | 0 | 0            | 0 | -0.068757932 |
| 0 | 0           | 0 | -0.07974512  | 0 | 0            | 0 | -0.069002137 |
| 0 | 0.00375242  | 0 | -0.079813944 | 0 | 0            | 0 | -0.069406365 |
| 0 | 0           | 0 | -0.066262915 | 0 | 0.012443326  | 0 | -0.067310606 |
| 0 | 0           | 0 | -0.078723583 | 0 | -0.00131374  | 0 | -0.070298498 |
| 0 | 0           | 0 | -0.054374735 | 0 | 0            | 0 | -0.066555645 |
| 0 | 0.000990438 | 0 | -0.054411201 | 0 | 0            | 0 | -0.066952068 |
| 0 | 0           | 0 | 0            | 0 | -0.051526147 | 0 | -0.068356854 |
| 0 | 0           | 0 | 0            | 0 | -0.051526203 | 0 | -0.066232951 |



|   |              |   |              |   |              |   |              |   |
|---|--------------|---|--------------|---|--------------|---|--------------|---|
| 0 | 0.001094997  | 0 | 0            | 0 | -0.051562366 | 0 | -0.066627442 | 0 |
| 0 | 0            | 0 | 0            | 0 | -0.07741682  | 0 | -0.068387517 | 0 |
| 0 | 0.003882493  | 0 | 0            | 0 | -0.077485843 | 0 | -0.068789274 | 0 |
| 0 | 0            | 0 | -0.082727542 | 0 | 0            | 0 | -0.056419798 | 0 |
| 0 | 0            | 0 | -0.074035183 | 0 | 0            | 0 | -0.046468952 | 0 |
| 0 | 0.058233669  | 0 | -0.074768713 | 0 | 0            | 0 | -0.04681325  | 0 |
| 0 | 0            | 0 | -0.077539751 | 0 | 0            | 0 | -0.042512888 | 0 |
| 0 | 0.021566858  | 0 | -0.077740069 | 0 | 0            | 0 | -0.042861886 | 0 |
| 0 | 0            | 0 | -0.066845623 | 0 | 0            | 0 | -0.065636859 | 0 |
| 0 | 0.048906341  | 0 | -0.067458035 | 0 | 0            | 0 | -0.066152629 | 0 |
| 0 | 0            | 0 | 0            | 0 | -0.080249975 | 0 | -0.055352015 | 0 |
| 0 | 0            | 0 | 0            | 0 | 0            | 0 | -0.072966378 | 0 |
| 0 | 0            | 0 | -0.080001404 | 0 | 0            | 0 | -0.047638777 | 0 |
| 0 | 0            | 0 | -0.097711687 | 0 | 0.018038532  | 0 | -0.046932225 | 0 |
| 0 | 0            | 0 | 0            | 0 | -0.070485278 | 0 | -0.044926778 | 0 |
| 0 | 0.019409585  | 0 | 0            | 0 | 0            | 0 | -0.073386003 | 0 |
| 0 | 0            | 0 | 0            | 0 | -0.064394666 | 0 | -0.065190372 | 0 |
| 0 | 0.05907217   | 0 | 0            | 0 | -0.071257098 | 0 | -0.04525925  | 0 |
| 0 | 0            | 0 | 0            | 0 | 0            | 0 | -0.079861746 | 0 |
| 0 | 0.048717802  | 0 | 0            | 0 | -0.065047161 | 0 | -0.065697379 | 0 |
| 0 | 0            | 0 | 0            | 0 | -0.07429539  | 0 | -0.040904133 | 0 |
| 0 | 0.022273945  | 0 | 0            | 0 | -0.074495115 | 0 | -0.041249484 | 0 |
| 0 | 0            | 0 | -0.12110998  | 0 | 0            | 0 | 0            | 0 |
| 0 | 0            | 0 | 0            | 0 | 0            | 0 | -0.070944207 | 0 |
| 0 | 0            | 0 | 0            | 0 | -0.076847846 | 0 | -0.045999926 | 0 |
| 0 | -0.003552071 | 0 | 0            | 0 | 0            | 0 | -0.069456256 | 0 |
| 0 | 0            | 0 | 0            | 0 | 0            | 0 | -0.069092274 | 0 |
| 0 | 0            | 0 | -0.074792613 | 0 | 0            | 0 | -0.071504455 | 0 |
| 0 | 0            | 0 | -0.07279528  | 0 | -0.003495114 | 0 | -0.071814979 | 0 |
| 0 | 0.13056689   | 0 | -0.12187447  | 0 | 0            | 0 | 0            | 0 |
| 0 | -0.21276068  | 0 | -0.089283783 | 0 | 0            | 0 | -0.045477038 | 0 |
| 0 | 0            | 0 | -0.099097903 | 0 | 0.013332733  | 0 | -0.051490402 | 0 |
| 0 | 0            | 0 | -0.086916462 | 0 | 0            | 0 | -0.052517537 | 0 |
| 0 | 0            | 0 | 0            | 0 | -0.072658985 | 0 | -0.070863853 | 0 |
| 0 | 0            | 0 | 0            | 0 | 0            | 0 | -0.068050735 | 0 |
| 0 | 0            | 0 | -0.087504768 | 0 | 0            | 0 | -0.04379294  | 0 |
| 0 | 0            | 0 | -0.095318011 | 0 | 0.006637874  | 0 | -0.045663287 | 0 |
| 0 | -0.18800579  | 0 | 0            | 0 | 0            | 0 | -0.06797349  | 0 |
| 0 | 0.014084366  | 0 | -0.087658473 | 0 | 0            | 0 | -0.044148766 | 0 |
| 0 | 0.022804113  | 0 | 0            | 0 | 0            | 0 | -0.068497647 | 0 |
| 0 | 0.013529437  | 0 | -0.095437114 | 0 | 0.006643123  | 0 | -0.045967008 | 0 |
| 0 | 0            | 0 | -0.077169864 | 0 | 0            | 0 | -0.064879033 | 0 |
| 0 | 0.006046374  | 0 | -0.077283071 | 0 | 0            | 0 | -0.065290374 | 0 |
| 0 | -0.20191254  | 0 | -0.082045924 | 0 | 0            | 0 | -0.064855959 | 0 |
| 0 | 0            | 0 | -0.068236343 | 0 | -0.009843082 | 0 | -0.066643176 | 0 |
| 0 | 0            | 0 | -0.053319763 | 0 | 0            | 0 | 0            | 0 |
| 0 | 0            | 0 | 0            | 0 | -0.11850507  | 0 | 0            | 0 |

|   |             |   |              |   |              |   |              |
|---|-------------|---|--------------|---|--------------|---|--------------|
| 0 | 0.024737039 | 0 | -0.053340248 | 0 | 0            | 0 | 0            |
| 0 | 0           | 0 | -0.09738568  | 0 | 0.008683355  | 0 | -0.046938272 |
| 0 | 0           | 0 | 0            | 0 | 0            | 0 | -0.071164812 |
| 0 | 0           | 0 | -0.070292614 | 0 | -0.011732076 | 0 | -0.064959178 |
| 0 | 0.003741387 | 0 | -0.070316592 | 0 | -0.011777796 | 0 | -0.065359929 |
| 0 | -0.21173781 | 0 | 0            | 0 | -0.086587013 | 0 | -0.043710649 |
| 0 | 0           | 0 | 0            | 0 | -0.075241889 | 0 | -0.064330925 |
| 0 | 0           | 0 | -0.064609886 | 0 | 0            | 0 | 0            |
| 0 | 0.006213963 | 0 | 0            | 0 | -0.07535527  | 0 | -0.064740261 |
| 0 | 0           | 0 | 0            | 0 | -0.050413563 | 0 | 0            |
| 0 | 0.07654188  | 0 | 0            | 0 | 0            | 0 | -0.071744592 |
| 0 | -0.20100946 | 0 | 0            | 0 | -0.080265699 | 0 | -0.064276127 |
| 0 | 0           | 0 | 0            | 0 | -0.084294638 | 0 | -0.051111844 |
| 0 | 0           | 0 | -0.065641114 | 0 | 0            | 0 | 0            |
| 0 | 0.024727157 | 0 | 0            | 0 | -0.050438095 | 0 | 0            |
| 0 | 0.12954416  | 0 | 0            | 0 | -0.11930831  | 0 | 0            |
| 0 | 0.035535202 | 0 | -0.06474668  | 0 | 0            | 0 | 0            |
| 0 | 0           | 0 | -0.054088883 | 0 | 0            | 0 | 0            |
| 0 | 0           | 0 | -0.055077972 | 0 | 0            | 0 | 0            |
| 0 | 0           | 0 | 0            | 0 | -0.084966207 | 0 | -0.042367123 |
| 0 | 0.060712648 | 0 | -0.066289208 | 0 | 0            | 0 | 0            |
| 0 | 0.014620654 | 0 | 0            | 0 | -0.085119679 | 0 | -0.042721245 |
| 0 | 0           | 0 | -0.066179539 | 0 | 0.012514567  | 0 | 0            |
| 0 | 0           | 0 | 0            | 0 | -0.062366558 | 0 | 0            |
| 0 | -0.22233856 | 0 | -0.072164088 | 0 | 0            | 0 | 0            |
| 0 | 0.035554049 | 0 | 0            | 0 | -0.062511739 | 0 | 0            |
| 0 | 0           | 0 | 0            | 0 | -0.051358006 | 0 | 0            |
| 0 | 0           | 0 | 0            | 0 | -0.052319092 | 0 | 0            |
| 0 | 0           | 0 | 0            | 0 | -0.063096617 | 0 | 0            |
| 0 | 0           | 0 | -0.071982444 | 0 | 0            | 0 | 0            |
| 0 | 0           | 0 | -0.079016322 | 0 | 0.007529512  | 0 | 0            |
| 0 | -0.22061813 | 0 | -0.070075673 | 0 | 0            | 0 | 0            |
| 0 | 0.060808236 | 0 | 0            | 0 | -0.06379058  | 0 | 0            |
| 0 | 0.036377846 | 0 | -0.072120372 | 0 | 0            | 0 | 0            |
| 0 | 0.035646719 | 0 | -0.0789827   | 0 | 0.007341971  | 0 | 0            |
| 0 | -0.22131252 | 0 | 0            | 0 | -0.069999525 | 0 | 0            |
| 0 | 0           | 0 | -0.06725277  | 0 | 0            | 0 | 0            |
| 0 | 0           | 0 | -0.069002146 | 0 | 0            | 0 | 0            |
| 0 | 0           | 0 | -0.080291496 | 0 | 0.011095412  | 0 | 0            |
| 0 | 0.069825655 | 0 | -0.067935436 | 0 | 0            | 0 | 0            |
| 0 | 0           | 0 | 0            | 0 | -0.07006115  | 0 | 0            |
| 0 | 0           | 0 | 0            | 0 | 0            | 0 | 0            |
| 0 | 0           | 0 | -0.069186491 | 0 | 0            | 0 | 0            |
| 0 | 0.066061621 | 0 | -0.069671003 | 0 | 0            | 0 | 0            |
| 0 | 0           | 0 | 0            | 0 | 0            | 0 | 0            |
| 0 | -0.21954592 | 0 | 0            | 0 | -0.067777206 | 0 | 0            |
| 0 | 0.036685117 | 0 | 0            | 0 | -0.070201316 | 0 | 0            |

|   |             |   |              |   |              |              |   |
|---|-------------|---|--------------|---|--------------|--------------|---|
| 0 | 0           | 0 | 0            | 0 | 0            | -0.023004863 | 0 |
| 0 | 0           | 0 | -0.067006083 | 0 | -0.001546819 | 0            | 0 |
| 0 | 0           | 0 | 0            | 0 | -0.064855713 | 0            | 0 |
| 0 | 0.071203614 | 0 | -0.08005803  | 0 | 0.010083108  | 0            | 0 |
| 0 | 0           | 0 | 0            | 0 | -0.066594921 | 0            | 0 |
| 0 | 0.10042604  | 0 | 0            | 0 | 0            | 0            | 0 |
| 0 | 0           | 0 | 0            | 0 | -0.067245324 | 0            | 0 |
| 0 | 0.13018569  | 0 | 0            | 0 | 0            | 0            | 0 |
| 0 | 0.069454313 | 0 | 0            | 0 | -0.065592695 | 0            | 0 |
| 0 | 0.10540081  | 0 | 0            | 0 | 0            | -0.023197224 | 0 |
| 0 | 0.066718732 | 0 | 0            | 0 | -0.06729754  | 0            | 0 |
| 0 | -0.14542588 | 0 | 0            | 0 | 0            | 0            | 0 |
| 0 | -0.21973831 | 0 | -0.079499169 | 0 | 0            | 0            | 0 |
| 0 | 0           | 0 | -0.076516687 | 0 | 0            | 0            | 0 |
| 0 | 0           | 0 | -0.078613288 | 0 | 0.00223933   | 0            | 0 |
| 0 | 0           | 0 | -0.054895321 | 0 | 0            | 0            | 0 |
| 0 | 0           | 0 | -0.078643203 | 0 | 0.003004362  | 0            | 0 |
| 0 | 0.019551369 | 0 | -0.0548864   | 0 | 0            | 0            | 0 |
| 0 | -0.21414362 | 0 | -0.057206833 | 0 | 0            | 0            | 0 |
| 0 | -0.202637   | 0 | 0            | 0 | 0            | 0            | 0 |
| 0 | 0           | 0 | -0.056330103 | 0 | 0            | 0            | 0 |
| 0 | 0           | 0 | 0            | 0 | 0            | 0            | 0 |
| 0 | 0           | 0 | 0            | 0 | 0            | 0            | 0 |
| 0 | 0           | 0 | -0.084289313 | 0 | 0.00539029   | 0            | 0 |
| 0 | 0.030725495 | 0 | 0            | 0 | 0            | 0            | 0 |
| 0 | 0           | 0 | 0            | 0 | -0.052519658 | 0            | 0 |
| 0 | 0.041730616 | 0 | -0.056389643 | 0 | 0            | 0            | 0 |
| 0 | 0.041316775 | 0 | 0            | 0 | 0            | 0            | 0 |
| 0 | 0.01960412  | 0 | 0            | 0 | -0.052511161 | 0            | 0 |
| 0 | -0.21321684 | 0 | 0            | 0 | -0.055058354 | 0            | 0 |
| 0 | 0.027762864 | 0 | -0.084262523 | 0 | 0.005286389  | 0            | 0 |
| 0 | 0           | 0 | -0.055262767 | 0 | 0            | 0            | 0 |
| 0 | 0           | 0 | -0.059187483 | 0 | 0.00252339   | 0            | 0 |
| 0 | 0           | 0 | -0.061506875 | 0 | 0.006599839  | 0            | 0 |
| 0 | -0.21536082 | 0 | -0.081745178 | 0 | 0            | 0            | 0 |
| 0 | 0           | 0 | 0            | 0 | -0.074777745 | 0            | 0 |
| 0 | 0           | 0 | 0            | 0 | -0.05395319  | 0            | 0 |
| 0 | 0.023646601 | 0 | -0.059215536 | 0 | 0.002523145  | 0            | 0 |
| 0 | -0.21851877 | 0 | 0            | 0 | -0.077626738 | 0            | 0 |
| 0 | 0           | 0 | 0            | 0 | 0            | -0.038734695 | 0 |
| 0 | 0.040682379 | 0 | 0            | 0 | -0.054061103 | 0            | 0 |
| 0 | -0.18647446 | 0 | 0            | 0 | 0            | -0.06702246  | 0 |
| 0 | -0.21712921 | 0 | -0.077099057 | 0 | -0.007752961 | 0            | 0 |
| 0 | 0           | 0 | 0            | 0 | -0.052967538 | 0            | 0 |
| 0 | 0           | 0 | -0.070340122 | 0 | -0.011354979 | 0            | 0 |
| 0 | 0           | 0 | 0            | 0 | 0            | -0.066988194 | 0 |
| 0 | -0.21431147 | 0 | 0            | 0 | -0.07997398  | 0            | 0 |

|   |             |   |              |   |              |              |   |
|---|-------------|---|--------------|---|--------------|--------------|---|
| 0 | 0.081925303 | 0 | 0            | 0 | 0            | -0.039000732 | 0 |
| 0 | 0.026910409 | 0 | -0.070279649 | 0 | -0.011466392 | 0            | 0 |
| 0 | 0           | 0 | 0            | 0 | 0            | 0            | 0 |
| 0 | -0.21704724 | 0 | -0.068887385 | 0 | 0            | 0            | 0 |
| 0 | 0           | 0 | 0            | 0 | 0            | 0            | 0 |
| 0 | 0           | 0 | -0.057973106 | 0 | 0.000407891  | 0            | 0 |
| 0 | 0.05241797  | 0 | 0            | 0 | 0            | 0            | 0 |
| 0 | 0.074489013 | 0 | 0            | 0 | 0            | -0.067544761 | 0 |
| 0 | 0           | 0 | -0.084367147 | 0 | 0.003868764  | 0            | 0 |
| 0 | 0           | 0 | -0.068206092 | 0 | 0            | 0            | 0 |
| 0 | 0           | 0 | -0.067603352 | 0 | -0.00094249  | 0            | 0 |
| 0 | -0.2159616  | 0 | 0            | 0 | -0.067015977 | 0            | 0 |
| 0 | 0           | 0 | 0            | 0 | 0            | 0            | 0 |
| 0 | 0.06899708  | 0 | -0.068805249 | 0 | 0            | 0            | 0 |
| 0 | 0.069687213 | 0 | -0.067277579 | 0 | -0.001992778 | 0            | 0 |
| 0 | 0           | 0 | -0.070533774 | 0 | -0.01092096  | 0            | 0 |
| 0 | 0           | 0 | 0            | 0 | -0.066231244 | 0            | 0 |
| 0 | -0.19713366 | 0 | 0            | 0 | 0            | -0.041562601 | 0 |
| 0 | 0           | 0 | 0            | 0 | 0            | -0.03742179  | 0 |
| 0 | 0           | 0 | 0            | 0 | 0            | -0.021202431 | 0 |
| 0 | 0.078383175 | 0 | 0            | 0 | 0            | 0            | 0 |
| 0 | 0.039231376 | 0 | 0            | 0 | 0            | -0.021459785 | 0 |
| 0 | 0.068075813 | 0 | 0            | 0 | -0.066885387 | 0            | 0 |
| 0 | 0           | 0 | 0            | 0 | 0            | -0.043359616 | 0 |
| 0 | -0.15681202 | 0 | 0            | 0 | 0            | 0            | 0 |
| 0 | 0           | 0 | -0.1056441   | 0 | 0            | 0            | 0 |
| 0 | 0.096974504 | 0 | 0            | 0 | 0            | -0.043436096 | 0 |
| 0 | 0           | 0 | -0.09360974  | 0 | 0            | -0.035596477 | 0 |
| 0 | -0.20143527 | 0 | 0            | 0 | 0            | 0            | 0 |
| 0 | 0.096383995 | 0 | -0.10645793  | 0 | 0            | 0            | 0 |
| 0 | -0.21416104 | 0 | -0.078656823 | 0 | 0            | 0            | 0 |
| 0 | 0           | 0 | 0            | 0 | 0            | -0.042112185 | 0 |
| 0 | 0.096624155 | 0 | -0.094515501 | 0 | 0            | -0.035577151 | 0 |
| 0 | 0           | 0 | 0            | 0 | 0            | 0            | 0 |
| 0 | -0.19857413 | 0 | 0            | 0 | 0            | 0            | 0 |
| 0 | 0.035989394 | 0 | 0            | 0 | 0            | -0.042418506 | 0 |
| 0 | -0.20687145 | 0 | 0            | 0 | 0            | 0            | 0 |
| 0 | 0.040107986 | 0 | 0            | 0 | 0            | 0            | 0 |
| 0 | -0.21336342 | 0 | 0            | 0 | -0.077235662 | 0            | 0 |
| 0 | -0.19731146 | 0 | 0            | 0 | 0            | -0.03471706  | 0 |
| 0 | 0           | 0 | -0.060944292 | 0 | -0.017931309 | 0            | 0 |
| 0 | -0.17495133 | 0 | 0            | 0 | 0            | -0.07081281  | 0 |
| 0 | -0.21338425 | 0 | -0.063615443 | 0 | -0.020401324 | 0            | 0 |
| 0 | 0.028014245 | 0 | -0.060917525 | 0 | -0.018062599 | 0            | 0 |
| 0 | 0           | 0 | 0            | 0 | 0            | 0            | 0 |
| 0 | 0           | 0 | 0            | 0 | 0            | -0.031828937 | 0 |
| 0 | -0.20098588 | 0 | 0            | 0 | 0            | 0            | 0 |

|   |             |   |              |   |              |   |              |   |
|---|-------------|---|--------------|---|--------------|---|--------------|---|
| 0 | 0           | 0 | 0            | 0 | -0.091436453 | 0 | -0.034175009 | 0 |
| 0 | 0.091629277 | 0 | 0            | 0 | 0            | 0 | 0            | 0 |
| 0 | 0           | 0 | 0            | 0 | -0.10145838  | 0 | 0            | 0 |
| 0 | 0.09692138  | 0 | 0            | 0 | -0.092382216 | 0 | -0.034152046 | 0 |
| 0 | 0           | 0 | 0            | 0 | 0            | 0 | 0            | 0 |
| 0 | 0.096004112 | 0 | 0            | 0 | -0.1023177   | 0 | 0            | 0 |
| 0 | 0           | 0 | 0            | 0 | 0            | 0 | -0.051165925 | 0 |
| 0 | 0           | 0 | -0.061848551 | 0 | -0.018882175 | 0 | 0            | 0 |
| 0 | -0.20003842 | 0 | 0            | 0 | 0            | 0 | 0            | 0 |
| 0 | -0.22156994 | 0 | -0.087026985 | 0 | 0            | 0 | 0            | 0 |
| 0 | 0           | 0 | -0.086093864 | 0 | 0            | 0 | 0            | 0 |
| 0 | 0           | 0 | -0.092422603 | 0 | 0            | 0 | -0.019587943 | 0 |
| 0 | 0           | 0 | -0.14027092  | 0 | 0            | 0 | -0.020482676 | 0 |
| 0 | 0           | 0 | -0.08492148  | 0 | -0.001843501 | 0 | 0            | 0 |
| 0 | 0           | 0 | -0.13798526  | 0 | 0            | 0 | 0            | 0 |
| 0 | -0.20348576 | 0 | 0            | 0 | 0            | 0 | 0            | 0 |
| 0 | 0.085269902 | 0 | -0.093305608 | 0 | 0            | 0 | -0.019720959 | 0 |
| 0 | 0.092701917 | 0 | -0.086993838 | 0 | 0            | 0 | 0            | 0 |
| 0 | -0.22177516 | 0 | -0.088187458 | 0 | 0            | 0 | 0            | 0 |
| 0 | -0.22038159 | 0 | 0            | 0 | -0.085446434 | 0 | 0            | 0 |
| 0 | -0.17819263 | 0 | 0            | 0 | 0            | 0 | -0.06601083  | 0 |
| 0 | 0.094607789 | 0 | -0.084910648 | 0 | -0.002819909 | 0 | 0            | 0 |
| 0 | 0           | 0 | -0.10583513  | 0 | -0.035128983 | 0 | 0            | 0 |
| 0 | 0           | 0 | 0            | 0 | -0.084422908 | 0 | 0            | 0 |
| 0 | 0           | 0 | -0.096343174 | 0 | 0.008921857  | 0 | 0            | 0 |
| 0 | -0.20219231 | 0 | 0            | 0 | 0            | 0 | 0            | 0 |
| 0 | 0           | 0 | 0            | 0 | -0.089428667 | 0 | -0.017474734 | 0 |
| 0 | 0           | 0 | 0            | 0 | -0.13840329  | 0 | -0.019072121 | 0 |
| 0 | 0.093164851 | 0 | 0            | 0 | -0.08536036  | 0 | 0            | 0 |
| 0 | 0           | 0 | 0            | 0 | -0.13623811  | 0 | 0            | 0 |
| 0 | 0.087131309 | 0 | -0.09622979  | 0 | 0.00789777   | 0 | 0            | 0 |
| 0 | -0.22048382 | 0 | 0            | 0 | -0.08606178  | 0 | 0            | 0 |
| 0 | -0.16464274 | 0 | -0.14060961  | 0 | 0            | 0 | 0            | 0 |
| 0 | 0           | 0 | -0.10380359  | 0 | -0.038807907 | 0 | 0            | 0 |
| 0 | 0.085857302 | 0 | 0            | 0 | -0.090353872 | 0 | -0.017597753 | 0 |
| 0 | 0           | 0 | -0.14056339  | 0 | 0            | 0 | 0            | 0 |
| 0 | 0           | 0 | 0            | 0 | 0            | 0 | -0.034846895 | 0 |
| 0 | 0.028658901 | 0 | -0.10383152  | 0 | -0.03893637  | 0 | 0            | 0 |
| 0 | 0.026973353 | 0 | -0.14070043  | 0 | 0            | 0 | 0            | 0 |
| 0 | 0           | 0 | -0.14124127  | 0 | 0            | 0 | -0.003385017 | 0 |
| 0 | 0.027743867 | 0 | -0.14141556  | 0 | 0            | 0 | -0.003644826 | 0 |
| 0 | 0           | 0 | 0            | 0 | 0            | 0 | -0.019352759 | 0 |
| 0 | 0.030441214 | 0 | 0            | 0 | 0            | 0 | -0.019613362 | 0 |
| 0 | -0.14360566 | 0 | 0            | 0 | 0            | 0 | -0.021580588 | 0 |
| 0 | 0           | 0 | -0.10579573  | 0 | -0.038156538 | 0 | 0            | 0 |
| 0 | -0.16499868 | 0 | 0            | 0 | -0.13917059  | 0 | 0            | 0 |
| 0 | 0           | 0 | -0.14294217  | 0 | 0            | 0 | -0.008617112 | 0 |

|   |             |   |              |   |              |   |              |   |
|---|-------------|---|--------------|---|--------------|---|--------------|---|
| 0 | 0           | 0 | -0.10540946  | 0 | -0.040013034 | 0 | -0.009076576 | 0 |
| 0 | 0           | 0 | 0            | 0 | -0.13909707  | 0 | 0            | 0 |
| 0 | 0           | 0 | 0            | 0 | -0.13968265  | 0 | -0.002263382 | 0 |
| 0 | 0.027119635 | 0 | 0            | 0 | -0.13923513  | 0 | 0            | 0 |
| 0 | -0.19832889 | 0 | 0            | 0 | 0            | 0 | 0            | 0 |
| 0 | -0.14910421 | 0 | 0            | 0 | 0            | 0 | 0            | 0 |
| 0 | 0.027920888 | 0 | 0            | 0 | -0.13986     | 0 | -0.00252223  | 0 |
| 0 | 0           | 0 | -0.1143207   | 0 | 0            | 0 | -0.033909513 | 0 |
| 0 | 0           | 0 | 0            | 0 | -0.14136353  | 0 | -0.007583909 | 0 |
| 0 | 0           | 0 | -0.12373965  | 0 | 0            | 0 | -0.00887386  | 0 |
| 0 | -0.19007412 | 0 | 0            | 0 | 0            | 0 | -0.029338128 | 0 |
| 0 | 0           | 0 | -0.11469135  | 0 | -0.009702517 | 0 | 0            | 0 |
| 0 | 0           | 0 | -0.096521173 | 0 | -0.02009307  | 0 | -0.033829448 | 0 |
| 0 | 0           | 0 | 0            | 0 | -0.11285892  | 0 | -0.032350664 | 0 |
| 0 | -0.21571848 | 0 | -0.11853863  | 0 | 0            | 0 | -0.018670421 | 0 |
| 0 | -0.19469228 | 0 | -0.12665496  | 0 | 0            | 0 | 0            | 0 |
| 0 | 0           | 0 | -0.11789132  | 0 | 0            | 0 | -0.018697969 | 0 |
| 0 | 0           | 0 | -0.10647684  | 0 | -0.005980799 | 0 | -0.021411582 | 0 |
| 0 | 0           | 0 | -0.12662766  | 0 | 0            | 0 | 0.004341352  | 0 |
| 0 | 0           | 0 | -0.11133705  | 0 | -0.016030308 | 0 | 0            | 0 |
| 0 | 0           | 0 | -0.093043674 | 0 | -0.026079705 | 0 | -0.018858101 | 0 |
| 0 | 0           | 0 | 0            | 0 | -0.12043196  | 0 | -0.007424304 | 0 |
| 0 | 0.020733923 | 0 | -0.11807458  | 0 | 0            | 0 | -0.019031697 | 0 |
| 0 | 0.021559046 | 0 | -0.12680505  | 0 | 0            | 0 | 0.00403485   | 0 |
| 0 | 0.020099332 | 0 | -0.11138541  | 0 | -0.016150803 | 0 | 0            | 0 |
| 0 | 0.022555523 | 0 | -0.09312171  | 0 | -0.026199096 | 0 | -0.019200157 | 0 |
| 0 | -0.21798296 | 0 | -0.11213411  | 0 | 0            | 0 | 0            | 0 |
| 0 | -0.21856962 | 0 | -0.08781974  | 0 | -0.025482048 | 0 | 0            | 0 |
| 0 | 0           | 0 | -0.096077392 | 0 | -0.025258749 | 0 | -0.022576785 | 0 |
| 0 | -0.21472616 | 0 | 0            | 0 | -0.11729939  | 0 | -0.017355394 | 0 |
| 0 | 0           | 0 | -0.11169504  | 0 | -0.017773801 | 0 | -0.00027472  | 0 |
| 0 | 0           | 0 | -0.088937222 | 0 | -0.023640614 | 0 | 0            | 0 |
| 0 | 0           | 0 | -0.08967492  | 0 | -0.018354855 | 0 | 0            | 0 |
| 0 | 0.026421084 | 0 | -0.088958649 | 0 | -0.023689036 | 0 | 0            | 0 |
| 0 | -0.21763061 | 0 | -0.11598509  | 0 | 0            | 0 | -0.008370375 | 0 |
| 0 | 0           | 0 | 0            | 0 | -0.11661928  | 0 | -0.017380173 | 0 |
| 0 | -0.21879722 | 0 | -0.09753137  | 0 | -0.01608797  | 0 | 0            | 0 |
| 0 | 0.021306427 | 0 | 0            | 0 | -0.11680094  | 0 | -0.017712262 | 0 |
| 0 | -0.1964042  | 0 | 0            | 0 | -0.12362698  | 0 | 0            | 0 |
| 0 | -0.21689896 | 0 | 0            | 0 | -0.11135727  | 0 | 0            | 0 |
| 0 | 0           | 0 | -0.10144599  | 0 | -0.014696102 | 0 | -0.008380454 | 0 |
| 0 | 0           | 0 | 0            | 0 | -0.12360326  | 0 | 0.005624767  | 0 |
| 0 | 0.01939676  | 0 | -0.1015578   | 0 | -0.014777442 | 0 | -0.00873399  | 0 |
| 0 | 0.021993423 | 0 | 0            | 0 | -0.12378123  | 0 | 0.005318283  | 0 |
| 0 | -0.23061092 | 0 | -0.096661815 | 0 | 0            | 0 | 0.012139486  | 0 |
| 0 | -0.23839165 | 0 | -0.095467989 | 0 | 0            | 0 | 0            | 0 |
| 0 | -0.216704   | 0 | 0            | 0 | -0.11402183  | 0 | -0.006185396 | 0 |

|   |             |   |              |   |              |   |              |   |
|---|-------------|---|--------------|---|--------------|---|--------------|---|
| 0 | 0           | 0 | -0.10990929  | 0 | 0.014201599  | 0 | 0.011984419  | 0 |
| 0 | 0           | 0 | -0.095698653 | 0 | 0            | 0 | 0.010887162  | 0 |
| 0 | -0.23068402 | 0 | -0.11997341  | 0 | 0.01906165   | 0 | 0            | 0 |
| 0 | 0           | 0 | -0.11118221  | 0 | 0.016472467  | 0 | 0            | 0 |
| 0 | 0.083618503 | 0 | -0.10985589  | 0 | 0.01318541   | 0 | 0.011873227  | 0 |
| 0 | 0.082694037 | 0 | -0.096606591 | 0 | 0            | 0 | 0.010739636  | 0 |
| 0 | 0.080664782 | 0 | -0.11108915  | 0 | 0.015408576  | 0 | 0            | 0 |
| 0 | -0.2294565  | 0 | 0            | 0 | -0.093610396 | 0 | 0.014546745  | 0 |
| 0 | -0.23939528 | 0 | 0            | 0 | -0.091527386 | 0 | 0            | 0 |
| 0 | 0           | 0 | 0            | 0 | -0.091932125 | 0 | 0.011786558  | 0 |
| 0 | 0.082769459 | 0 | 0            | 0 | -0.092889549 | 0 | 0.011650484  | 0 |
| 0 | -0.22908387 | 0 | -0.11274355  | 0 | 0            | 0 | 0.012378291  | 0 |
| 0 | -0.22696662 | 0 | -0.10577079  | 0 | -0.008232517 | 0 | 0.014405999  | 0 |
| 0 | -0.23597228 | 0 | -0.10692787  | 0 | -0.005965076 | 0 | 0            | 0 |
| 0 | 0           | 0 | 0            | 0 | 0            | 0 | 0            | 0 |
| 0 | 0           | 0 | -0.10489197  | 0 | -0.008061381 | 0 | 0.013061144  | 0 |
| 0 | 0.033243641 | 0 | -0.10498724  | 0 | -0.008082509 | 0 | 0.012765354  | 0 |
| 0 | 0           | 0 | 0            | 0 | 0            | 0 | -0.01155139  | 0 |
| 0 | -0.15892558 | 0 | 0            | 0 | 0            | 0 | 0            | 0 |
| 0 | -0.22979197 | 0 | 0            | 0 | -0.10975229  | 0 | 0.013442683  | 0 |
| 0 | 0.16662708  | 0 | 0            | 0 | 0            | 0 | 0            | 0 |
| 0 | 0.16889521  | 0 | 0            | 0 | 0            | 0 | -0.011464323 | 0 |
| 0 | 0           | 0 | 0            | 0 | 0            | 0 | -0.020594951 | 0 |
| 0 | -0.19369316 | 0 | 0            | 0 | 0            | 0 | -0.02034297  | 0 |
| 0 | 0           | 0 | -0.10734492  | 0 | -0.005234677 | 0 | 0.004281584  | 0 |
| 0 | -0.19689152 | 0 | 0            | 0 | 0            | 0 | 0            | 0 |
| 0 | 0.14727303  | 0 | 0            | 0 | 0            | 0 | -0.020454071 | 0 |
| 0 | -0.18984108 | 0 | 0            | 0 | 0            | 0 | 0            | 0 |
| 0 | -0.19632068 | 0 | 0            | 0 | 0            | 0 | -0.005158648 | 0 |
| 0 | 0           | 0 | 0            | 0 | 0            | 0 | -0.002144695 | 0 |
| 0 | 0.14085394  | 0 | 0            | 0 | 0            | 0 | -0.002189416 | 0 |
| 0 | 0           | 0 | -0.073558875 | 0 | 0            | 0 | -0.059435766 | 0 |
| 0 | 0           | 0 | -0.084920785 | 0 | 0            | 0 | -0.061492593 | 0 |
| 0 | 0           | 0 | 0            | 0 | -0.069551006 | 0 | -0.059057937 | 0 |
| 0 | 0           | 0 | 0            | 0 | -0.081669744 | 0 | -0.061009129 | 0 |
| 0 | 0           | 0 | -0.093648434 | 0 | 0            | 0 | -0.062936219 | 0 |
| 0 | 0           | 0 | -0.098575028 | 0 | 0            | 0 | -0.057592629 | 0 |
| 0 | 0.002131482 | 0 | -0.098586024 | 0 | 0            | 0 | -0.057640218 | 0 |
| 0 | 0           | 0 | -0.093907533 | 0 | -0.004935314 | 0 | -0.058091418 | 0 |
| 0 | 0           | 0 | 0            | 0 | -0.090700211 | 0 | -0.062223485 | 0 |
| 0 | 0           | 0 | 0            | 0 | -0.095806157 | 0 | -0.056892325 | 0 |
| 0 | 0.002285855 | 0 | 0            | 0 | -0.095813064 | 0 | -0.056935801 | 0 |
| 0 | 0           | 0 | -0.074806356 | 0 | 0            | 0 | -0.054333446 | 0 |
| 0 | -0.23166989 | 0 | 0            | 0 | 0            | 0 | 0.008520506  | 0 |
| 0 | 0           | 0 | 0            | 0 | -0.071421442 | 0 | -0.053975919 | 0 |
| 0 | 0           | 0 | -0.077591549 | 0 | 0            | 0 | -0.056776616 | 0 |
| 0 | 0           | 0 | -0.08079947  | 0 | 0.003404458  | 0 | -0.055005662 | 0 |

|   |              |   |              |   |              |   |              |   |
|---|--------------|---|--------------|---|--------------|---|--------------|---|
| 0 | 0            | 0 | -0.077562529 | 0 | 0            | 0 | -0.054932265 | 0 |
| 0 | -4.98E-05    | 0 | -0.077568091 | 0 | 0            | 0 | -0.054983605 | 0 |
| 0 | 0            | 0 | -0.077068172 | 0 | 0            | 0 | 0            | 0 |
| 0 | 0.019457794  | 0 | -0.077075418 | 0 | 0            | 0 | 0            | 0 |
| 0 | 0            | 0 | 0            | 0 | -0.074497786 | 0 | -0.056215174 | 0 |
| 0 | 0            | 0 | -0.077754259 | 0 | 0            | 0 | 0            | 0 |
| 0 | 0            | 0 | -0.087460078 | 0 | 0            | 0 | -0.054082187 | 0 |
| 0 | 0            | 0 | 0            | 0 | -0.074556624 | 0 | -0.054488273 | 0 |
| 0 | 7.10E-05     | 0 | 0            | 0 | -0.074562138 | 0 | -0.054539275 | 0 |
| 0 | 0.041730812  | 0 | -0.087636798 | 0 | 0            | 0 | -0.054215626 | 0 |
| 0 | 0            | 0 | -0.078329402 | 0 | 0            | 0 | 0            | 0 |
| 0 | 0            | 0 | -0.084079302 | 0 | 0.006475592  | 0 | 0            | 0 |
| 0 | 0            | 0 | -0.087130265 | 0 | 0            | 0 | 0            | 0 |
| 0 | 0.028037098  | 0 | -0.087169831 | 0 | 0            | 0 | 0            | 0 |
| 0 | 0            | 0 | 0            | 0 | -0.073764565 | 0 | 0            | 0 |
| 0 | 0.019429363  | 0 | 0            | 0 | -0.073772892 | 0 | 0            | 0 |
| 0 | 0            | 0 | 0            | 0 | 0            | 0 | -0.064012534 | 0 |
| 0 | 0            | 0 | 0            | 0 | 0            | 0 | -0.064460397 | 0 |
| 0 | 0            | 0 | 0            | 0 | 0            | 0 | -0.062869426 | 0 |
| 0 | 0.001745723  | 0 | 0            | 0 | 0            | 0 | -0.062913791 | 0 |
| 0 | 0            | 0 | -0.088614349 | 0 | 0            | 0 | 0            | 0 |
| 0 | 0            | 0 | 0            | 0 | -0.074568317 | 0 | 0            | 0 |
| 0 | 0.058223708  | 0 | -0.088839433 | 0 | 0            | 0 | 0            | 0 |
| 0 | 0            | 0 | 0            | 0 | -0.075135518 | 0 | 0            | 0 |
| 0 | 0            | 0 | 0            | 0 | -0.084876207 | 0 | -0.053531907 | 0 |
| 0 | 0.041224371  | 0 | 0            | 0 | -0.085062694 | 0 | -0.053661659 | 0 |
| 0 | 0            | 0 | 0            | 0 | -0.084395082 | 0 | 0            | 0 |
| 0 | 0.028050893  | 0 | 0            | 0 | -0.084436492 | 0 | 0            | 0 |
| 0 | 0            | 0 | -0.096180494 | 0 | 0            | 0 | -0.059194287 | 0 |
| 0 | 0            | 0 | -0.086569466 | 0 | -0.008965298 | 0 | -0.058873712 | 0 |
| 0 | 0            | 0 | -0.090685384 | 0 | 0            | 0 | 0            | 0 |
| 0 | 0            | 0 | -0.084945406 | 0 | -0.005593562 | 0 | 0            | 0 |
| 0 | 0            | 0 | 0            | 0 | -0.085872551 | 0 | 0            | 0 |
| 0 | 0.057596273  | 0 | 0            | 0 | -0.086108985 | 0 | 0            | 0 |
| 0 | 0            | 0 | 0            | 0 | -0.093645246 | 0 | -0.058412639 | 0 |
| 0 | 0            | 0 | 0            | 0 | -0.088178594 | 0 | 0            | 0 |
| 0 | 0            | 0 | -0.083883583 | 0 | -0.015958144 | 0 | -0.053987441 | 0 |
| 0 | 0            | 0 | -0.099046872 | 0 | 0            | 0 | -0.053421607 | 0 |
| 0 | 0.002819971  | 0 | -0.099061757 | 0 | 0            | 0 | -0.053471588 | 0 |
| 0 | 0            | 0 | -0.084434413 | 0 | -0.016428209 | 0 | -0.05328969  | 0 |
| 0 | 0.002147209  | 0 | -0.084437342 | 0 | -0.01643312  | 0 | -0.053336665 | 0 |
| 0 | -0.022270789 | 0 | -0.10034432  | 0 | 0            | 0 | -0.053425463 | 0 |
| 0 | 0            | 0 | -0.087730655 | 0 | -0.013327882 | 0 | 0            | 0 |
| 0 | 0.021110188  | 0 | -0.087724356 | 0 | -0.01333843  | 0 | 0            | 0 |
| 0 | -0.0233355   | 0 | -0.10064095  | 0 | 0            | 0 | 0            | 0 |
| 0 | 0            | 0 | 0            | 0 | -0.096707814 | 0 | -0.052769829 | 0 |
| 0 | 0.00302497   | 0 | 0            | 0 | -0.096722735 | 0 | -0.052819827 | 0 |





|   |              |   |              |   |              |   |              |
|---|--------------|---|--------------|---|--------------|---|--------------|
| 0 | 0.024746211  | 0 | 0            | 0 | 0            | 0 | 0            |
| 0 | -0.023979518 | 0 | 0            | 0 | 0            | 0 | 0            |
| 0 | -0.025368575 | 0 | 0            | 0 | -0.098859338 | 0 | 0            |
| 0 | 0            | 0 | 0            | 0 | 0            | 0 | 0            |
| 0 | -0.20704694  | 0 | 0            | 0 | 0            | 0 | 0.007959505  |
| 0 | -0.20532817  | 0 | 0            | 0 | 0            | 0 | 0            |
| 0 | -0.20370046  | 0 | 0            | 0 | 0            | 0 | 0.006817551  |
| 0 | 0            | 0 | 0            | 0 | 0            | 0 | 0.00722147   |
| 0 | 0.038796131  | 0 | 0            | 0 | 0            | 0 | 0.006905066  |
| 0 | -0.18046442  | 0 | 0            | 0 | 0            | 0 | 0.015478713  |
| 0 | 0            | 0 | 0            | 0 | 0            | 0 | 0            |
| 0 | 0.078357332  | 0 | 0            | 0 | 0            | 0 | 0            |
| 0 | 0            | 0 | 0            | 0 | 0            | 0 | 0            |
| 0 | 0.035477584  | 0 | 0            | 0 | 0            | 0 | 0            |
| 0 | -0.020233822 | 0 | 0            | 0 | 0            | 0 | 0            |
| 0 | 0            | 0 | 0            | 0 | 0            | 0 | -0.057219596 |
| 0 | -0.022023826 | 0 | 0            | 0 | 0            | 0 | -0.057267481 |
| 0 | 0.078478325  | 0 | 0            | 0 | 0            | 0 | -0.057417731 |
| 0 | -0.026196761 | 0 | 0            | 0 | 0            | 0 | 0            |
| 0 | -0.02670288  | 0 | 0            | 0 | 0            | 0 | 0            |
| 0 | -0.02276252  | 0 | 0            | 0 | 0            | 0 | 0            |
| 0 | -0.006737228 | 0 | 0            | 0 | 0            | 0 | -0.061271742 |
| 0 | 0            | 0 | -0.11621541  | 0 | 0            | 0 | -0.038414347 |
| 0 | 0            | 0 | -0.10658811  | 0 | 0            | 0 | 0            |
| 0 | 0            | 0 | -0.11217807  | 0 | 0            | 0 | 0            |
| 0 | 0.10158792   | 0 | -0.10709309  | 0 | 0            | 0 | 0            |
| 0 | 0.042074071  | 0 | -0.11232747  | 0 | 0            | 0 | 0            |
| 0 | 0            | 0 | 0            | 0 | -0.11317925  | 0 | -0.037418926 |
| 0 | 0            | 0 | 0            | 0 | -0.10291035  | 0 | 0            |
| 0 | 0            | 0 | 0            | 0 | -0.10948974  | 0 | 0            |
| 0 | 0.042296848  | 0 | 0            | 0 | -0.1096432   | 0 | 0            |
| 0 | 0.10126785   | 0 | 0            | 0 | -0.10344311  | 0 | 0            |
| 0 | -0.024907445 | 0 | 0            | 0 | 0            | 0 | 0            |
| 0 | 0            | 0 | -0.11554378  | 0 | 0            | 0 | 0            |
| 0 | 0            | 0 | -0.10531386  | 0 | -0.010924749 | 0 | 0            |
| 0 | -0.015443704 | 0 | 0            | 0 | 0            | 0 | -0.056522352 |
| 0 | 0            | 0 | -0.09018958  | 0 | 0            | 0 | -0.020442865 |
| 0 | 0            | 0 | 0            | 0 | -0.11295274  | 0 | 0            |
| 0 | 0            | 0 | -0.11858205  | 0 | 0            | 0 | -0.035633811 |
| 0 | 0.065210668  | 0 | -0.090808318 | 0 | 0            | 0 | -0.020634547 |
| 0 | -0.14955179  | 0 | -0.090939556 | 0 | 0            | 0 | 0            |
| 0 | 0            | 0 | -0.089089934 | 0 | 0            | 0 | 0            |
| 0 | 0            | 0 | -0.11656504  | 0 | 0.026858755  | 0 | 0            |
| 0 | 0.0676129    | 0 | -0.089639303 | 0 | 0            | 0 | 0            |
| 0 | 0            | 0 | -0.11869958  | 0 | 0            | 0 | -0.023822255 |
| 0 | 0.071779575  | 0 | -0.11653389  | 0 | 0.026176497  | 0 | 0            |
| 0 | 0.020486639  | 0 | -0.11881241  | 0 | 0            | 0 | -0.024044544 |

|   |             |   |              |   |              |   |              |   |
|---|-------------|---|--------------|---|--------------|---|--------------|---|
| 0 | 0           | 0 | -0.05164576  | 0 | 0            | 0 | -0.07291045  | 0 |
| 0 | 0           | 0 | 0            | 0 | -0.085344461 | 0 | -0.019529428 | 0 |
| 0 | 0           | 0 | -0.11646955  | 0 | -0.004007525 | 0 | -0.028341172 | 0 |
| 0 | 0           | 0 | -0.074943704 | 0 | 0.025895518  | 0 | -0.071773929 | 0 |
| 0 | 0           | 0 | -0.050388008 | 0 | 0            | 0 | -0.072502026 | 0 |
| 0 | 0           | 0 | -0.050306902 | 0 | 0            | 0 | -0.070909451 | 0 |
| 0 | 0.000760538 | 0 | -0.050343841 | 0 | 0            | 0 | -0.071309237 | 0 |
| 0 | 0           | 0 | -0.09586597  | 0 | 0            | 0 | -0.01930464  | 0 |
| 0 | 0.026669002 | 0 | -0.096027053 | 0 | 0            | 0 | -0.019555479 | 0 |
| 0 | 0           | 0 | 0            | 0 | -0.047948187 | 0 | -0.072635574 | 0 |
| 0 | 0           | 0 | 0            | 0 | -0.11514507  | 0 | -0.034295231 | 0 |
| 0 | 0.06596412  | 0 | 0            | 0 | -0.085996802 | 0 | -0.019712966 | 0 |
| 0 | -0.12465338 | 0 | -0.11736729  | 0 | 0            | 0 | 0            | 0 |
| 0 | 0           | 0 | -0.11132084  | 0 | -0.006532556 | 0 | 0            | 0 |
| 0 | -0.15061348 | 0 | 0            | 0 | -0.086391247 | 0 | 0            | 0 |
| 0 | 0.027905624 | 0 | -0.11147039  | 0 | -0.006504254 | 0 | 0            | 0 |
| 0 | 0           | 0 | -0.062082337 | 0 | 0            | 0 | -0.070863778 | 0 |
| 0 | 0           | 0 | 0            | 0 | -0.084296368 | 0 | 0            | 0 |
| 0 | -0.15404483 | 0 | -0.096291072 | 0 | 0            | 0 | 0            | 0 |
| 0 | 0           | 0 | 0            | 0 | -0.046577872 | 0 | -0.072157671 | 0 |
| 0 | 0.012161868 | 0 | -0.062217328 | 0 | 0            | 0 | -0.071292864 | 0 |
| 0 | 0           | 0 | 0            | 0 | -0.046541841 | 0 | -0.070624156 | 0 |
| 0 | 0.000891426 | 0 | 0            | 0 | -0.046578322 | 0 | -0.071021488 | 0 |
| 0 | 0           | 0 | -0.062877918 | 0 | 0            | 0 | -0.075123122 | 0 |
| 0 | 0           | 0 | -0.11196165  | 0 | 0.01629947   | 0 | 0            | 0 |
| 0 | 0           | 0 | -0.075782057 | 0 | 0.012985127  | 0 | -0.074263624 | 0 |
| 0 | 0.067665956 | 0 | 0            | 0 | -0.0848805   | 0 | 0            | 0 |
| 0 | 0.032843344 | 0 | -0.11202235  | 0 | 0.016192111  | 0 | 0            | 0 |
| 0 | 0           | 0 | 0            | 0 | -0.11545943  | 0 | -0.022578472 | 0 |
| 0 | -0.15221805 | 0 | -0.10480355  | 0 | 0            | 0 | -0.01943729  | 0 |
| 0 | 0.020905059 | 0 | 0            | 0 | -0.11557156  | 0 | -0.022800976 | 0 |
| 0 | 0           | 0 | -0.11229412  | 0 | -0.006269126 | 0 | 0            | 0 |
| 0 | 0           | 0 | -0.09835761  | 0 | 0            | 0 | -0.02594101  | 0 |
| 0 | 0           | 0 | -0.11704969  | 0 | 0.019027728  | 0 | -0.025167618 | 0 |
| 0 | 0           | 0 | -0.11690283  | 0 | 0.012591653  | 0 | -0.019331644 | 0 |
| 0 | 0           | 0 | 0            | 0 | -0.0591506   | 0 | -0.070439396 | 0 |
| 0 | 0.022028937 | 0 | -0.11698229  | 0 | 0.012605766  | 0 | -0.019571094 | 0 |
| 0 | 0.012424481 | 0 | 0            | 0 | -0.059287396 | 0 | -0.070871971 | 0 |
| 0 | 0           | 0 | 0            | 0 | -0.059970695 | 0 | -0.074670064 | 0 |
| 0 | 0           | 0 | -0.11938683  | 0 | 0.017035476  | 0 | -0.026932472 | 0 |
| 0 | 0           | 0 | 0            | 0 | -0.091339023 | 0 | -0.018308506 | 0 |
| 0 | 0.027290029 | 0 | 0            | 0 | -0.091499072 | 0 | -0.018557525 | 0 |
| 0 | -0.14549614 | 0 | -0.11310166  | 0 | 0.008155542  | 0 | 0            | 0 |
| 0 | -0.12574907 | 0 | 0            | 0 | -0.11444839  | 0 | 0            | 0 |
| 0 | -0.15546745 | 0 | 0            | 0 | -0.092025925 | 0 | 0            | 0 |
| 0 | 0           | 0 | -0.065335724 | 0 | 0            | 0 | -0.069492699 | 0 |
| 0 | 0           | 0 | -0.11244787  | 0 | 0.012690065  | 0 | 0            | 0 |

|   |              |   |              |   |              |              |              |
|---|--------------|---|--------------|---|--------------|--------------|--------------|
| 0 | 0.047746078  | 0 | -0.065950589 | 0 | 0            | -0.070010557 | 0            |
| 0 | -0.15316982  | 0 | 0            | 0 | -0.10080539  | 0            | -0.018319036 |
| 0 | 0            | 0 | 0            | 0 | -0.093911047 | 0            | -0.024904594 |
| 0 | 0            | 0 | 0            | 0 | -0.062249038 | 0            | -0.069027546 |
| 0 | 0.047901469  | 0 | 0            | 0 | -0.062903941 | 0            | -0.069536559 |
| 0 | -0.19110471  | 0 | 0            | 0 | 0            | 0            | -0.072455624 |
| 0 | 0            | 0 | 0            | 0 | 0            | 0            | -0.072894466 |
| 0 | 0.006408032  | 0 | 0            | 0 | 0            | 0            | -0.073281776 |
| 0 | 0            | 0 | 0            | 0 | 0            | 0            | -0.075046305 |
| 0 | 0            | 0 | 0            | 0 | 0            | 0            | -0.072484244 |
| 0 | 0.015930816  | 0 | 0            | 0 | 0            | 0            | -0.07292861  |
| 0 | 0            | 0 | -0.081045521 | 0 | 0.006867358  | 0            | -0.075719603 |
| 0 | 0            | 0 | -0.052002526 | 0 | 0            | 0            | -0.069063998 |
| 0 | 0            | 0 | -0.068619253 | 0 | 0.017368917  | 0            | -0.0670067   |
| 0 | -0.003981944 | 0 | -0.052167544 | 0 | 0            | 0            | -0.067791111 |
| 0 | 0            | 0 | -0.052151237 | 0 | 0            | 0            | -0.067401161 |
| 0 | -0.20359207  | 0 | -0.080146691 | 0 | 0            | 0            | -0.068801646 |
| 0 | 0            | 0 | 0            | 0 | -0.048737953 | 0            | -0.068699365 |
| 0 | -0.20258968  | 0 | -0.054767486 | 0 | 0            | 0            | -0.066353763 |
| 0 | 0            | 0 | -0.053917632 | 0 | 0            | 0            | -0.066479217 |
| 0 | -0.003807604 | 0 | 0            | 0 | -0.049019103 | 0            | -0.067485479 |
| 0 | 0            | 0 | 0            | 0 | -0.049005935 | 0            | -0.067099354 |
| 0 | 0.019157294  | 0 | -0.05398433  | 0 | 0            | 0            | -0.066941652 |
| 0 | 0            | 0 | -0.070593261 | 0 | 0            | 0            | -0.044226179 |
| 0 | 0            | 0 | -0.067242407 | 0 | 0.013459912  | 0            | -0.068913195 |
| 0 | 0            | 0 | -0.079782065 | 0 | 0            | 0            | -0.052345491 |
| 0 | 0            | 0 | -0.078627684 | 0 | -0.001155322 | 0            | -0.068991213 |
| 0 | 0.003749215  | 0 | -0.078652739 | 0 | -0.001200603 | 0            | -0.069395    |
| 0 | 0            | 0 | -0.066225895 | 0 | 0.012469598  | 0            | -0.06667204  |
| 0 | 0.001001892  | 0 | -0.066235687 | 0 | 0.012442533  | 0            | -0.067067809 |
| 0 | 0.022805778  | 0 | -0.079975238 | 0 | 0            | 0            | -0.052674369 |
| 0 | 0            | 0 | 0            | 0 | 0            | 0            | -0.072561498 |
| 0 | -0.20155174  | 0 | 0            | 0 | -0.051915579 | 0            | -0.066029099 |
| 0 | 0            | 0 | 0            | 0 | -0.050836196 | 0            | -0.066172616 |
| 0 | 0.05083197   | 0 | -0.071250592 | 0 | 0            | 0            | -0.044514582 |
| 0 | 0.018340602  | 0 | 0            | 0 | -0.0509395   | 0            | -0.066628572 |
| 0 | -0.20245584  | 0 | 0            | 0 | -0.077812897 | 0            | -0.068184762 |
| 0 | 0.053457423  | 0 | 0            | 0 | 0            | 0            | -0.073105169 |
| 0 | -0.21636521  | 0 | -0.074373063 | 0 | 0            | 0            | -0.04638296  |
| 0 | 0            | 0 | -0.075582842 | 0 | 0            | 0            | -0.051328858 |
| 0 | 0            | 0 | -0.082164616 | 0 | 0            | 0            | -0.058259991 |
| 0 | 0            | 0 | -0.091344316 | 0 | 0.009000946  | 0            | -0.056468603 |
| 0 | -0.21776615  | 0 | -0.07787249  | 0 | 0            | 0            | -0.042410857 |
| 0 | 0            | 0 | -0.099415795 | 0 | 0.026606072  | 0            | -0.046884267 |
| 0 | 0            | 0 | 0            | 0 | -0.077222506 | 0            | -0.051198511 |
| 0 | 0.063359987  | 0 | -0.076246427 | 0 | 0            | 0            | -0.051450289 |
| 0 | -0.20570846  | 0 | -0.067213029 | 0 | 0            | 0            | -0.065433226 |

|   |             |   |              |   |              |   |              |   |
|---|-------------|---|--------------|---|--------------|---|--------------|---|
| 0 | 0           | 0 | 0            | 0 | -0.066851708 | 0 | -0.042701545 | 0 |
| 0 | 0.023478655 | 0 | 0            | 0 | -0.077414585 | 0 | -0.051525177 | 0 |
| 0 | 0.059141811 | 0 | -0.099338833 | 0 | 0.025755641  | 0 | -0.047216486 | 0 |
| 0 | 0           | 0 | -0.096065822 | 0 | 0.019322388  | 0 | -0.04276871  | 0 |
| 0 | 0.051648243 | 0 | 0            | 0 | -0.067545278 | 0 | -0.042980188 | 0 |
| 0 | 0.021660397 | 0 | -0.096179719 | 0 | 0.01923242   | 0 | -0.043116491 | 0 |
| 0 | 0           | 0 | -0.0748017   | 0 | 0.008317602  | 0 | -0.065710336 | 0 |
| 0 | 0           | 0 | -0.066734777 | 0 | 0            | 0 | -0.065624114 | 0 |
| 0 | -0.21511764 | 0 | 0            | 0 | -0.070822997 | 0 | -0.044835118 | 0 |
| 0 | -0.18997108 | 0 | 0            | 0 | 0            | 0 | -0.072793901 | 0 |
| 0 | 0           | 0 | 0            | 0 | -0.072364984 | 0 | -0.050016805 | 0 |
| 0 | -0.20455088 | 0 | 0            | 0 | -0.064756855 | 0 | -0.06498505  | 0 |
| 0 | 0           | 0 | 0            | 0 | -0.079648753 | 0 | -0.057072585 | 0 |
| 0 | 0.049190619 | 0 | -0.074585774 | 0 | 0.00745149   | 0 | -0.066219137 | 0 |
| 0 | 0.048545083 | 0 | -0.067277895 | 0 | 0            | 0 | -0.066130955 | 0 |
| 0 | 0           | 0 | 0            | 0 | 0            | 0 | 0            | 0 |
| 0 | -0.21664736 | 0 | 0            | 0 | -0.07462729  | 0 | -0.040796944 | 0 |
| 0 | 0           | 0 | -0.098388628 | 0 | 0.01918829   | 0 | -0.047961161 | 0 |
| 0 | 0.064336931 | 0 | 0            | 0 | -0.07305761  | 0 | -0.050132276 | 0 |
| 0 | 0           | 0 | 0            | 0 | -0.064153319 | 0 | -0.065162774 | 0 |
| 0 | 0.12799164  | 0 | 0            | 0 | 0            | 0 | 0            | 0 |
| 0 | 0           | 0 | -0.12201737  | 0 | 0            | 0 | -0.016664218 | 0 |
| 0 | 0.048069048 | 0 | 0            | 0 | -0.064740217 | 0 | -0.065660642 | 0 |
| 0 | 0           | 0 | -0.12051892  | 0 | 0            | 0 | 0            | 0 |
| 0 | -0.13407608 | 0 | -0.12092618  | 0 | 0            | 0 | 0            | 0 |
| 0 | 0           | 0 | 0            | 0 | 0            | 0 | -0.068980217 | 0 |
| 0 | -0.1871665  | 0 | 0            | 0 | 0            | 0 | -0.068915007 | 0 |
| 0 | 0           | 0 | -0.10995621  | 0 | -0.011723692 | 0 | 0            | 0 |
| 0 | 0.12904591  | 0 | -0.12278818  | 0 | 0            | 0 | -0.016633139 | 0 |
| 0 | 0.01582174  | 0 | 0            | 0 | 0            | 0 | -0.069417427 | 0 |
| 0 | 0.12858347  | 0 | -0.12126069  | 0 | 0            | 0 | 0            | 0 |
| 0 | 0           | 0 | -0.071566363 | 0 | -0.003350035 | 0 | -0.071459869 | 0 |
| 0 | 0.13017767  | 0 | -0.10993523  | 0 | -0.012546402 | 0 | 0            | 0 |
| 0 | -0.21360073 | 0 | -0.087830523 | 0 | 0            | 0 | -0.043645725 | 0 |
| 0 | -0.21269637 | 0 | -0.095507127 | 0 | 0.006448705  | 0 | -0.045573356 | 0 |
| 0 | -0.18978266 | 0 | 0            | 0 | 0            | 0 | -0.067871594 | 0 |
| 0 | 0           | 0 | -0.098595172 | 0 | 0.012213193  | 0 | -0.052623236 | 0 |
| 0 | -0.20281728 | 0 | -0.077553584 | 0 | 0            | 0 | -0.064675691 | 0 |
| 0 | -0.21647462 | 0 | -0.053727111 | 0 | 0            | 0 | 0            | 0 |
| 0 | 0           | 0 | -0.05453892  | 0 | 0            | 0 | 0            | 0 |
| 0 | 0           | 0 | 0            | 0 | -0.11917074  | 0 | -0.015426544 | 0 |
| 0 | 0.029583611 | 0 | -0.054515319 | 0 | 0            | 0 | 0            | 0 |
| 0 | -0.1885488  | 0 | 0            | 0 | 0            | 0 | -0.070989094 | 0 |
| 0 | 0           | 0 | -0.053028695 | 0 | 0            | 0 | 0            | 0 |
| 0 | 0           | 0 | -0.096459253 | 0 | 0.00935599   | 0 | -0.043838622 | 0 |
| 0 | 0           | 0 | -0.060235124 | 0 | 0            | 0 | 0            | 0 |
| 0 | 0.014118346 | 0 | -0.096547657 | 0 | 0.009287819  | 0 | -0.044194123 | 0 |

|   |             |   |              |   |              |   |              |   |
|---|-------------|---|--------------|---|--------------|---|--------------|---|
| 0 | 0           | 0 | 0            | 0 | -0.11782112  | 0 | 0            | 0 |
| 0 | 0           | 0 | -0.067989096 | 0 | -0.009511137 | 0 | -0.06480009  | 0 |
| 0 | -0.13511962 | 0 | 0            | 0 | -0.11831989  | 0 | 0            | 0 |
| 0 | 0.006008508 | 0 | -0.068034604 | 0 | -0.009581294 | 0 | -0.065210895 | 0 |
| 0 | -0.20201125 | 0 | -0.070548069 | 0 | -0.011881347 | 0 | -0.064756112 | 0 |
| 0 | 0           | 0 | -0.066575732 | 0 | 0.013958906  | 0 | 0            | 0 |
| 0 | 0.037487171 | 0 | -0.053086083 | 0 | 0            | 0 | 0            | 0 |
| 0 | -0.21982278 | 0 | -0.064997769 | 0 | 0            | 0 | 0            | 0 |
| 0 | -0.2153557  | 0 | 0            | 0 | -0.050813271 | 0 | 0            | 0 |
| 0 | 0           | 0 | 0            | 0 | -0.051725846 | 0 | 0            | 0 |
| 0 | -0.20196013 | 0 | 0            | 0 | -0.075620669 | 0 | -0.064125586 | 0 |
| 0 | -0.22327447 | 0 | -0.065981625 | 0 | 0            | 0 | 0            | 0 |
| 0 | 0.056724062 | 0 | -0.060785613 | 0 | 0            | 0 | 0            | 0 |
| 0 | 0.024798303 | 0 | -0.066538631 | 0 | 0.013907528  | 0 | 0            | 0 |
| 0 | 0.029569688 | 0 | 0            | 0 | -0.051706109 | 0 | 0            | 0 |
| 0 | 0.12817279  | 0 | 0            | 0 | -0.11997583  | 0 | -0.015390338 | 0 |
| 0 | 0           | 0 | 0            | 0 | -0.049959133 | 0 | 0            | 0 |
| 0 | 0           | 0 | 0            | 0 | -0.057703514 | 0 | 0            | 0 |
| 0 | -0.21239854 | 0 | 0            | 0 | -0.085289671 | 0 | -0.042217406 | 0 |
| 0 | 0           | 0 | -0.055113211 | 0 | 0            | 0 | 0            | 0 |
| 0 | 0           | 0 | -0.065573407 | 0 | 0            | 0 | 0            | 0 |
| 0 | 0.12782003  | 0 | 0            | 0 | -0.11859916  | 0 | 0            | 0 |
| 0 | 0           | 0 | -0.067099265 | 0 | 0.002590867  | 0 | 0            | 0 |
| 0 | 0.036620528 | 0 | 0            | 0 | -0.050062313 | 0 | 0            | 0 |
| 0 | -0.21877065 | 0 | 0            | 0 | -0.06274639  | 0 | 0            | 0 |
| 0 | 0           | 0 | -0.080704274 | 0 | 0.015839429  | 0 | 0            | 0 |
| 0 | 0           | 0 | 0            | 0 | 0            | 0 | -0.028830504 | 0 |
| 0 | 0.056269687 | 0 | 0            | 0 | -0.058305737 | 0 | 0            | 0 |
| 0 | 0.0355574   | 0 | -0.067045796 | 0 | 0.002393146  | 0 | 0            | 0 |
| 0 | 0           | 0 | -0.06497396  | 0 | 0.011459216  | 0 | 0            | 0 |
| 0 | 0.063473687 | 0 | -0.066226791 | 0 | 0            | 0 | 0            | 0 |
| 0 | 0           | 0 | -0.065955311 | 0 | 0.011460184  | 0 | 0            | 0 |
| 0 | -0.22217824 | 0 | 0            | 0 | -0.063434734 | 0 | 0            | 0 |
| 0 | 0.061247367 | 0 | -0.080493435 | 0 | 0.014935856  | 0 | 0            | 0 |
| 0 | 0           | 0 | 0            | 0 | -0.052498717 | 0 | 0            | 0 |
| 0 | -0.22211214 | 0 | -0.072334073 | 0 | 0            | 0 | 0            | 0 |
| 0 | -0.22229553 | 0 | -0.079259288 | 0 | 0.007413986  | 0 | 0            | 0 |
| 0 | 0.12605718  | 0 | 0            | 0 | 0            | 0 | -0.028900845 | 0 |
| 0 | 0           | 0 | 0            | 0 | -0.063288184 | 0 | 0            | 0 |
| 0 | 0           | 0 | 0            | 0 | 0            | 0 | -0.022604771 | 0 |
| 0 | -0.21903628 | 0 | -0.067634081 | 0 | 0            | 0 | 0            | 0 |
| 0 | -0.22141247 | 0 | -0.069348026 | 0 | 0            | 0 | 0            | 0 |
| 0 | 0.063962314 | 0 | 0            | 0 | -0.06397597  | 0 | 0            | 0 |
| 0 | 0           | 0 | -0.07708695  | 0 | 0.005338477  | 0 | 0            | 0 |
| 0 | -0.22055383 | 0 | -0.08053484  | 0 | 0.010980818  | 0 | 0            | 0 |
| 0 | 0.094125728 | 0 | 0            | 0 | 0            | 0 | -0.022805435 | 0 |
| 0 | 0.036404791 | 0 | -0.077124703 | 0 | 0.005233754  | 0 | 0            | 0 |

|   |             |   |              |   |              |   |              |   |
|---|-------------|---|--------------|---|--------------|---|--------------|---|
| 0 | -0.22106291 | 0 | 0            | 0 | -0.070409585 | 0 | 0            | 0 |
| 0 | 0           | 0 | -0.074457073 | 0 | 0.007535616  | 0 | 0            | 0 |
| 0 | 0           | 0 | -0.083212279 | 0 | 0.014949218  | 0 | 0            | 0 |
| 0 | -0.21777916 | 0 | 0            | 0 | -0.065231578 | 0 | 0            | 0 |
| 0 | -0.15384938 | 0 | 0            | 0 | 0            | 0 | 0            | 0 |
| 0 | -0.12522714 | 0 | 0            | 0 | 0            | 0 | 0            | 0 |
| 0 | -0.15340914 | 0 | 0            | 0 | 0            | 0 | -0.023275187 | 0 |
| 0 | 0.070089893 | 0 | -0.074124226 | 0 | 0.006469751  | 0 | 0            | 0 |
| 0 | -0.22018142 | 0 | 0            | 0 | -0.066938339 | 0 | 0            | 0 |
| 0 | 0           | 0 | -0.065951173 | 0 | -0.003366023 | 0 | 0            | 0 |
| 0 | 0.066455178 | 0 | -0.083206198 | 0 | 0.014238887  | 0 | 0            | 0 |
| 0 | 0           | 0 | 0            | 0 | 0            | 0 | -0.050332717 | 0 |
| 0 | -0.21316006 | 0 | -0.055307677 | 0 | 0            | 0 | 0            | 0 |
| 0 | 0.090526097 | 0 | 0            | 0 | 0            | 0 | -0.05044013  | 0 |
| 0 | 0           | 0 | 0            | 0 | 0            | 0 | -0.029027345 | 0 |
| 0 | 0           | 0 | -0.054479869 | 0 | 0            | 0 | 0            | 0 |
| 0 | -0.21565936 | 0 | -0.056736073 | 0 | 0            | 0 | 0            | 0 |
| 0 | 0.044511542 | 0 | 0            | 0 | 0            | 0 | -0.029258665 | 0 |
| 0 | -0.20384716 | 0 | 0            | 0 | 0            | 0 | 0            | 0 |
| 0 | 0.03706483  | 0 | -0.054504227 | 0 | 0            | 0 | 0            | 0 |
| 0 | -0.20393007 | 0 | 0            | 0 | 0            | 0 | 0            | 0 |
| 0 | -0.21971357 | 0 | -0.084563682 | 0 | 0.005296775  | 0 | 0            | 0 |
| 0 | 0           | 0 | -0.078273172 | 0 | 0.00183806   | 0 | 0            | 0 |
| 0 | -0.21219269 | 0 | 0            | 0 | -0.0529277   | 0 | 0            | 0 |
| 0 | 0           | 0 | -0.061239344 | 0 | 0.006689758  | 0 | 0            | 0 |
| 0 | 0           | 0 | 0            | 0 | 0            | 0 | 0            | 0 |
| 0 | 0.019557323 | 0 | -0.061335911 | 0 | 0.006795079  | 0 | 0            | 0 |
| 0 | 0           | 0 | 0            | 0 | -0.051877087 | 0 | 0            | 0 |
| 0 | -0.21412813 | 0 | -0.059566579 | 0 | 0.00248199   | 0 | 0            | 0 |
| 0 | -0.21459695 | 0 | 0            | 0 | -0.054351142 | 0 | 0            | 0 |
| 0 | 0           | 0 | -0.062156047 | 0 | 0.006130914  | 0 | 0            | 0 |
| 0 | 0.044546972 | 0 | 0            | 0 | 0            | 0 | 0            | 0 |
| 0 | 0.036165899 | 0 | 0            | 0 | -0.051943609 | 0 | 0            | 0 |
| 0 | -0.20177108 | 0 | 0            | 0 | 0            | 0 | -0.038619703 | 0 |
| 0 | 0.041801913 | 0 | -0.06150449  | 0 | 0.005388893  | 0 | 0            | 0 |
| 0 | 0           | 0 | -0.060739986 | 0 | 0.005770368  | 0 | 0            | 0 |
| 0 | -0.2154321  | 0 | -0.070644834 | 0 | -0.011474057 | 0 | 0            | 0 |
| 0 | -0.18714224 | 0 | 0            | 0 | 0            | 0 | -0.066809157 | 0 |
| 0 | -0.13405096 | 0 | 0            | 0 | 0            | 0 | 0            | 0 |
| 0 | -0.21708588 | 0 | -0.068584926 | 0 | 0            | 0 | 0            | 0 |
| 0 | -0.21704993 | 0 | -0.067914177 | 0 | -0.00101722  | 0 | 0            | 0 |
| 0 | -0.20523424 | 0 | 0            | 0 | 0            | 0 | 0            | 0 |
| 0 | 0           | 0 | -0.067219818 | 0 | -0.001030363 | 0 | 0            | 0 |
| 0 | -0.2160264  | 0 | 0            | 0 | -0.066602339 | 0 | 0            | 0 |
| 0 | 0           | 0 | 0            | 0 | 0            | 0 | -0.041286226 | 0 |
| 0 | 0.068909156 | 0 | -0.066793291 | 0 | -0.002101855 | 0 | 0            | 0 |
| 0 | -0.16408967 | 0 | 0            | 0 | 0            | 0 | -0.021488296 | 0 |

|   |             |   |              |   |              |              |              |
|---|-------------|---|--------------|---|--------------|--------------|--------------|
| 0 | -0.19643468 | 0 | 0            | 0 | 0            | -0.043199443 | 0            |
| 0 | -0.2169847  | 0 | -0.093921206 | 0 | 0            | -0.035462109 | 0            |
| 0 | -0.18287708 | 0 | -0.10556661  | 0 | 0            | 0            | 0            |
| 0 | 0           | 0 | -0.093020485 | 0 | 0            | -0.035563484 | 0            |
| 0 | 0           | 0 | -0.11903621  | 0 | 0.014013657  | 0            | 0            |
| 0 | 0           | 0 | -0.10565212  | 0 | 0            | -0.002399765 | 0            |
| 0 | 0           | 0 | -0.09482073  | 0 | 0.001266789  | 0            | -0.035602328 |
| 0 | -0.19515062 | 0 | 0            | 0 | 0            | -0.041948232 | 0            |
| 0 | -0.20032366 | 0 | 0            | 0 | 0            | 0            | 0            |
| 0 | 0.09463865  | 0 | -0.093904336 | 0 | 0            | -0.035542764 | 0            |
| 0 | 0.096901557 | 0 | -0.11898724  | 0 | 0.013109496  | 0            | 0            |
| 0 | 0.095880627 | 0 | -0.10646747  | 0 | 0            | -0.002484982 | 0            |
| 0 | -0.21427525 | 0 | -0.061228047 | 0 | -0.01805345  | 0            | 0            |
| 0 | -0.20654241 | 0 | 0            | 0 | 0            | 0            | 0            |
| 0 | 0.096634544 | 0 | -0.094797877 | 0 | 0.000295325  | 0            | -0.035578569 |
| 0 | -0.2158364  | 0 | 0            | 0 | -0.091744788 | 0            | -0.034037496 |
| 0 | 0           | 0 | 0            | 0 | -0.090757396 | 0            | -0.03413282  |
| 0 | -0.1845935  | 0 | 0            | 0 | -0.10139616  | 0            | 0            |
| 0 | 0.095170411 | 0 | 0            | 0 | -0.091676394 | 0            | -0.034105932 |
| 0 | 0           | 0 | 0            | 0 | -0.10144402  | 0            | -0.001222221 |
| 0 | 0           | 0 | -0.13885103  | 0 | 0            | -0.020336909 | 0            |
| 0 | 0.095749478 | 0 | 0            | 0 | -0.1023031   | 0            | -0.001299146 |
| 0 | -0.22102133 | 0 | -0.086440637 | 0 | 0            | 0            | 0            |
| 0 | -0.21958698 | 0 | -0.092742164 | 0 | 0            | -0.019493163 | 0            |
| 0 | -0.22157705 | 0 | -0.085197685 | 0 | -0.001915416 | 0            | 0            |
| 0 | 0           | 0 | -0.086705558 | 0 | 0.000640849  | 0            | 0            |
| 0 | 0           | 0 | -0.10944134  | 0 | -0.032246047 | 0            | -0.020216636 |
| 0 | 0           | 0 | -0.1060824   | 0 | 0.01429581   | 0            | -0.019753675 |
| 0 | 0           | 0 | -0.10876694  | 0 | -0.030604691 | 0            | 0            |
| 0 | -0.21983835 | 0 | 0            | 0 | -0.084766798 | 0            | 0            |
| 0 | 0.085762379 | 0 | -0.1060221   | 0 | 0.013307488  | 0            | -0.019875384 |
| 0 | 0.092693253 | 0 | -0.086740278 | 0 | -0.000265665 | 0            | 0            |
| 0 | -0.22173167 | 0 | -0.096599964 | 0 | 0.00882903   | 0            | 0            |
| 0 | 0           | 0 | 0            | 0 | -0.13682725  | 0            | -0.018944166 |
| 0 | -0.21839932 | 0 | 0            | 0 | -0.089747547 | 0            | -0.017374779 |
| 0 | -0.16412885 | 0 | -0.10368288  | 0 | -0.038612978 | 0            | 0            |
| 0 | -0.16437346 | 0 | -0.14025698  | 0 | 0            | 0            | 0            |
| 0 | -0.16572259 | 0 | -0.14095497  | 0 | 0            | -0.003633535 | 0            |
| 0 | 0           | 0 | -0.10499349  | 0 | -0.037213127 | 0            | 0            |
| 0 | 0           | 0 | -0.10435013  | 0 | -0.038561536 | 0            | -0.003231928 |
| 0 | 0.026872998 | 0 | -0.10505462  | 0 | -0.037292055 | 0            | 0            |
| 0 | 0           | 0 | -0.14088138  | 0 | 0            | -0.003313629 | 0            |
| 0 | 0.027584104 | 0 | -0.10439721  | 0 | -0.038691598 | 0            | -0.003490987 |
| 0 | 0.025879701 | 0 | -0.14104106  | 0 | 0            | -0.00357096  | 0            |
| 0 | -0.15353404 | 0 | 0            | 0 | 0            | -0.019535279 | 0            |
| 0 | 0           | 0 | -0.1071007   | 0 | -0.03747928  | 0            | -0.008462827 |
| 0 | -0.16480268 | 0 | 0            | 0 | -0.13878511  | 0            | 0            |



|   |              |   |              |   |              |   |              |   |
|---|--------------|---|--------------|---|--------------|---|--------------|---|
| 0 | -0.16575159  | 0 | 0            | 0 | -0.13938945  | 0 | -0.00251366  | 0 |
| 0 | 0            | 0 | 0            | 0 | -0.13929105  | 0 | -0.002200016 | 0 |
| 0 | 0.026379973  | 0 | 0            | 0 | -0.1394565   | 0 | -0.002442239 | 0 |
| 0 | 0            | 0 | -0.099124448 | 0 | -0.015789894 | 0 | -0.033846023 | 0 |
| 0 | 0            | 0 | -0.11651924  | 0 | -0.007501786 | 0 | -0.008770395 | 0 |
| 0 | -0.2152911   | 0 | -0.11821169  | 0 | 0            | 0 | -0.018558996 | 0 |
| 0 | -0.21584344  | 0 | -0.093273342 | 0 | -0.026172376 | 0 | -0.018718244 | 0 |
| 0 | -0.19302263  | 0 | -0.12650199  | 0 | 0            | 0 | 0.003940455  | 0 |
| 0 | -0.19479492  | 0 | -0.11108859  | 0 | -0.01614003  | 0 | 0            | 0 |
| 0 | 0            | 0 | -0.094355561 | 0 | -0.024391631 | 0 | -0.018746266 | 0 |
| 0 | 0            | 0 | -0.11050188  | 0 | -0.016714401 | 0 | 0.004482692  | 0 |
| 0 | 0.020649796  | 0 | -0.094479125 | 0 | -0.024453701 | 0 | -0.019080118 | 0 |
| 0 | 0.021490289  | 0 | -0.11060905  | 0 | -0.016787099 | 0 | 0.004176664  | 0 |
| 0 | -0.21811725  | 0 | -0.089200761 | 0 | -0.023751512 | 0 | 0            | 0 |
| 0 | -0.21433479  | 0 | 0            | 0 | -0.11693701  | 0 | -0.017238971 | 0 |
| 0 | -0.21774372  | 0 | -0.10164096  | 0 | -0.014838486 | 0 | -0.008278237 | 0 |
| 0 | -0.19418424  | 0 | 0            | 0 | -0.12348413  | 0 | 0.005219987  | 0 |
| 0 | -0.23052241  | 0 | -0.11010722  | 0 | 0.0140714    | 0 | 0.011977124  | 0 |
| 0 | -0.23271933  | 0 | -0.095713315 | 0 | 0            | 0 | 0.010268899  | 0 |
| 0 | -0.23818195  | 0 | -0.1109537   | 0 | 0.016200247  | 0 | 0            | 0 |
| 0 | 0            | 0 | -0.10926009  | 0 | 0.014192489  | 0 | 0.010724962  | 0 |
| 0 | 0.083182704  | 0 | -0.10919516  | 0 | 0.013172084  | 0 | 0.010590871  | 0 |
| 0 | -0.23323338  | 0 | 0            | 0 | -0.091956956 | 0 | 0.011168404  | 0 |
| 0 | -0.22915782  | 0 | -0.10477005  | 0 | -0.008244399 | 0 | 0.012459918  | 0 |
| 0 | 0            | 0 | 0            | 0 | 0            | 0 | -0.011541608 | 0 |
| 0 | -0.15798314  | 0 | 0            | 0 | 0            | 0 | 0            | 0 |
| 0 | -0.16179496  | 0 | 0            | 0 | 0            | 0 | -0.011755923 | 0 |
| 0 | 0.16577064   | 0 | 0            | 0 | 0            | 0 | -0.011454364 | 0 |
| 0 | -0.19314215  | 0 | 0            | 0 | 0            | 0 | -0.020430438 | 0 |
| 0 | -0.19086113  | 0 | 0            | 0 | 0            | 0 | -0.002526948 | 0 |
| 0 | 0            | 0 | -0.074348329 | 0 | 0            | 0 | -0.060453207 | 0 |
| 0 | 0            | 0 | -0.073593538 | 0 | 0            | 0 | -0.060642536 | 0 |
| 0 | 0            | 0 | -0.090519036 | 0 | 0.017882947  | 0 | -0.059634153 | 0 |
| 0 | 0            | 0 | -0.073562146 | 0 | 0            | 0 | -0.05946631  | 0 |
| 0 | -0.00032657  | 0 | -0.073567745 | 0 | 0            | 0 | -0.059515119 | 0 |
| 0 | 0            | 0 | -0.084076408 | 0 | 0            | 0 | -0.05937931  | 0 |
| 0 | 0.008874331  | 0 | -0.084101106 | 0 | 0            | 0 | -0.059451064 | 0 |
| 0 | 0            | 0 | -0.084374347 | 0 | 0            | 0 | -0.062809683 | 0 |
| 0 | 0            | 0 | 0            | 0 | -0.070402761 | 0 | -0.060066274 | 0 |
| 0 | 0            | 0 | -0.091366291 | 0 | 0.006710708  | 0 | -0.061567219 | 0 |
| 0 | 0            | 0 | 0            | 0 | -0.069526696 | 0 | -0.060134775 | 0 |
| 0 | 0            | 0 | 0            | 0 | -0.069550363 | 0 | -0.059051934 | 0 |
| 0 | -0.000174284 | 0 | 0            | 0 | -0.069555352 | 0 | -0.059100017 | 0 |
| 0 | 0            | 0 | -0.086185128 | 0 | 0            | 0 | -0.058158324 | 0 |
| 0 | 0.040302412  | 0 | -0.086353158 | 0 | 0            | 0 | -0.058287241 | 0 |
| 0 | 0            | 0 | 0            | 0 | -0.080783419 | 0 | -0.058840172 | 0 |
| 0 | 0.009156894  | 0 | 0            | 0 | -0.080807259 | 0 | -0.058910829 | 0 |

|   |              |   |              |   |              |   |              |   |
|---|--------------|---|--------------|---|--------------|---|--------------|---|
| 0 | 0            | 0 | 0            | 0 | -0.081096899 | 0 | -0.062209694 | 0 |
| 0 | 0            | 0 | 0            | 0 | -0.082874634 | 0 | -0.057582149 | 0 |
| 0 | 0.040185046  | 0 | 0            | 0 | -0.083052658 | 0 | -0.057708032 | 0 |
| 0 | 0            | 0 | -0.096005854 | 0 | 0.002453282  | 0 | -0.062980493 | 0 |
| 0 | -0.020668458 | 0 | -0.098595023 | 0 | 0            | 0 | -0.057590182 | 0 |
| 0 | 0            | 0 | -0.094003951 | 0 | -0.004732247 | 0 | -0.057549531 | 0 |
| 0 | 0.002119014  | 0 | -0.093987981 | 0 | -0.00475507  | 0 | -0.057593756 | 0 |
| 0 | 0            | 0 | -0.074671218 | 0 | 0            | 0 | -0.057011596 | 0 |
| 0 | -0.021246646 | 0 | 0            | 0 | -0.095825314 | 0 | -0.056889568 | 0 |
| 0 | -0.006768484 | 0 | -0.074872115 | 0 | 0            | 0 | -0.055942086 | 0 |
| 0 | 0            | 0 | -0.074867251 | 0 | 0            | 0 | -0.0559128   | 0 |
| 0 | 0            | 0 | -0.084152978 | 0 | 0.009858756  | 0 | -0.054428798 | 0 |
| 0 | 0            | 0 | 0            | 0 | -0.071129498 | 0 | -0.056502041 | 0 |
| 0 | -0.006509977 | 0 | 0            | 0 | -0.071467213 | 0 | -0.055522293 | 0 |
| 0 | 0            | 0 | 0            | 0 | -0.071462813 | 0 | -0.055490636 | 0 |
| 0 | 0            | 0 | -0.077108322 | 0 | 0            | 0 | -0.054867473 | 0 |
| 0 | 0.019108497  | 0 | -0.07712446  | 0 | 0            | 0 | -0.0549647   | 0 |
| 0 | 0            | 0 | -0.081921928 | 0 | 0.004560264  | 0 | -0.056831275 | 0 |
| 0 | -0.02694726  | 0 | -0.077573502 | 0 | 0            | 0 | -0.054926063 | 0 |
| 0 | 0            | 0 | -0.080796557 | 0 | 0.003405907  | 0 | -0.054965585 | 0 |
| 0 | -4.66E-05    | 0 | -0.080800004 | 0 | 0.003403679  | 0 | -0.055016886 | 0 |
| 0 | 0            | 0 | -0.077752553 | 0 | 0            | 0 | 0            | 0 |
| 0 | 0.022599499  | 0 | -0.077752351 | 0 | 0            | 0 | 0            | 0 |
| 0 | 0            | 0 | -0.076790464 | 0 | 0            | 0 | 0            | 0 |
| 0 | 0.032636594  | 0 | -0.076813011 | 0 | 0            | 0 | 0            | 0 |
| 0 | -0.028166838 | 0 | -0.077079415 | 0 | 0            | 0 | 0            | 0 |
| 0 | 0            | 0 | -0.084272019 | 0 | 0.007590183  | 0 | 0            | 0 |
| 0 | 0.01949212   | 0 | -0.084262866 | 0 | 0.00757286   | 0 | 0            | 0 |
| 0 | 0            | 0 | -0.083116182 | 0 | 0            | 0 | 0            | 0 |
| 0 | 0.048671861  | 0 | -0.083298074 | 0 | 0            | 0 | 0            | 0 |
| 0 | 0            | 0 | 0            | 0 | -0.073897367 | 0 | -0.054442929 | 0 |
| 0 | 0.017835347  | 0 | 0            | 0 | -0.073920898 | 0 | -0.054536088 | 0 |
| 0 | 0            | 0 | -0.089027907 | 0 | 0            | 0 | -0.054174388 | 0 |
| 0 | 0            | 0 | -0.07830194  | 0 | 0            | 0 | 0            | 0 |
| 0 | 0.044564669  | 0 | -0.089192744 | 0 | 0            | 0 | -0.05431034  | 0 |
| 0 | 0            | 0 | -0.083231267 | 0 | 0.005768769  | 0 | 0            | 0 |
| 0 | -0.028071914 | 0 | -0.087472245 | 0 | 0            | 0 | -0.054075564 | 0 |
| 0 | 0            | 0 | -0.088056249 | 0 | 0.000623604  | 0 | -0.054087697 | 0 |
| 0 | -0.026670466 | 0 | 0            | 0 | -0.074567354 | 0 | -0.054482033 | 0 |
| 0 | 0.041744769  | 0 | -0.087984648 | 0 | 0.000363873  | 0 | -0.054219002 | 0 |
| 0 | 0            | 0 | -0.083932767 | 0 | 0.005901766  | 0 | 0            | 0 |
| 0 | -0.031030511 | 0 | -0.087141089 | 0 | 0            | 0 | 0            | 0 |
| 0 | 0            | 0 | 0            | 0 | -0.074517235 | 0 | 0            | 0 |
| 0 | 0            | 0 | -0.084820083 | 0 | -0.002405328 | 0 | 0            | 0 |
| 0 | 0.022600246  | 0 | 0            | 0 | -0.074517613 | 0 | 0            | 0 |
| 0 | 0.028014121  | 0 | -0.084815055 | 0 | -0.002451826 | 0 | 0            | 0 |
| 0 | 0            | 0 | 0            | 0 | -0.073359702 | 0 | 0            | 0 |

|   |              |   |              |   |              |   |              |   |
|---|--------------|---|--------------|---|--------------|---|--------------|---|
| 0 | 0.031312636  | 0 | 0            | 0 | -0.073392959 | 0 | 0            | 0 |
| 0 | -0.028465493 | 0 | 0            | 0 | -0.073765104 | 0 | 0            | 0 |
| 0 | 0            | 0 | 0            | 0 | 0            | 0 | -0.062734426 | 0 |
| 0 | 0            | 0 | 0            | 0 | -0.080199762 | 0 | 0            | 0 |
| 0 | 0.016684954  | 0 | 0            | 0 | 0            | 0 | -0.06281897  | 0 |
| 0 | 0.047861551  | 0 | 0            | 0 | -0.080394872 | 0 | 0            | 0 |
| 0 | 0            | 0 | 0            | 0 | 0            | 0 | -0.064762623 | 0 |
| 0 | 0            | 0 | 0            | 0 | 0            | 0 | -0.063050623 | 0 |
| 0 | 0.004090353  | 0 | 0            | 0 | 0            | 0 | -0.06310212  | 0 |
| 0 | 0            | 0 | 0            | 0 | -0.075199174 | 0 | 0            | 0 |
| 0 | -0.021567402 | 0 | 0            | 0 | 0            | 0 | -0.062863468 | 0 |
| 0 | -0.028804689 | 0 | -0.088627381 | 0 | 0            | 0 | 0            | 0 |
| 0 | 0            | 0 | -0.090941468 | 0 | 0.002433418  | 0 | 0            | 0 |
| 0 | 0            | 0 | 0            | 0 | -0.086177375 | 0 | -0.053604691 | 0 |
| 0 | 0.058307216  | 0 | -0.090514853 | 0 | 0.001772529  | 0 | 0            | 0 |
| 0 | 0.043693948  | 0 | 0            | 0 | -0.08635281  | 0 | -0.053736582 | 0 |
| 0 | -0.027614504 | 0 | 0            | 0 | -0.08488778  | 0 | -0.053525318 | 0 |
| 0 | -0.03077717  | 0 | 0            | 0 | -0.084405678 | 0 | 0            | 0 |
| 0 | 0            | 0 | -0.087440667 | 0 | -0.009079793 | 0 | -0.059070843 | 0 |
| 0 | 0            | 0 | -0.084317874 | 0 | -0.006627498 | 0 | 0            | 0 |
| 0 | -0.028338128 | 0 | 0            | 0 | -0.085882573 | 0 | 0            | 0 |
| 0 | 0            | 0 | -0.083779832 | 0 | -0.01582563  | 0 | -0.053285604 | 0 |
| 0 | 0.002757139  | 0 | -0.083820628 | 0 | -0.015799223 | 0 | -0.053336728 | 0 |
| 0 | -0.0231069   | 0 | -0.099057627 | 0 | 0            | 0 | -0.053415674 | 0 |
| 0 | -0.022355379 | 0 | -0.084442387 | 0 | -0.016437967 | 0 | -0.053283927 | 0 |
| 0 | -0.023400608 | 0 | -0.087739046 | 0 | -0.013337934 | 0 | 0            | 0 |
| 0 | -0.022971706 | 0 | 0            | 0 | -0.09671858  | 0 | -0.052763801 | 0 |
| 0 | 0            | 0 | -0.077649776 | 0 | 0            | 0 | 0            | 0 |
| 0 | 0.030702466  | 0 | -0.077662282 | 0 | 0            | 0 | 0            | 0 |
| 0 | 0            | 0 | 0            | 0 | 0            | 0 | -0.062860063 | 0 |
| 0 | 0.056846829  | 0 | 0            | 0 | 0            | 0 | -0.06303833  | 0 |
| 0 | -0.025208305 | 0 | -0.078072392 | 0 | 0            | 0 | 0            | 0 |
| 0 | 0            | 0 | -0.07897753  | 0 | 0.000966735  | 0 | 0            | 0 |
| 0 | 0.012353171  | 0 | -0.078978838 | 0 | 0.000966664  | 0 | 0            | 0 |
| 0 | 0            | 0 | -0.079046781 | 0 | 0.000710556  | 0 | 0            | 0 |
| 0 | 0            | 0 | 0            | 0 | -0.074673632 | 0 | 0            | 0 |
| 0 | 0.029399284  | 0 | 0            | 0 | -0.074695245 | 0 | 0            | 0 |
| 0 | -0.025012242 | 0 | 0            | 0 | -0.07529073  | 0 | 0            | 0 |
| 0 | -0.030761697 | 0 | -0.080069346 | 0 | 0            | 0 | 0            | 0 |
| 0 | 0            | 0 | -0.078390139 | 0 | -0.001756325 | 0 | 0            | 0 |
| 0 | 0.037439489  | 0 | -0.078256577 | 0 | -0.001925218 | 0 | 0            | 0 |
| 0 | -0.029144589 | 0 | -0.075740673 | 0 | -0.005045443 | 0 | 0            | 0 |
| 0 | -0.030355509 | 0 | 0            | 0 | -0.077430517 | 0 | 0            | 0 |
| 0 | -0.029075469 | 0 | -0.091124345 | 0 | 0            | 0 | 0            | 0 |
| 0 | 0            | 0 | -0.084528628 | 0 | -0.006885358 | 0 | 0            | 0 |
| 0 | 0            | 0 | 0            | 0 | 0            | 0 | -0.05912917  | 0 |
| 0 | 0.014943677  | 0 | 0            | 0 | 0            | 0 | -0.059202417 | 0 |

|   |              |   |              |   |              |   |              |   |
|---|--------------|---|--------------|---|--------------|---|--------------|---|
| 0 | 0.060756627  | 0 | -0.084412722 | 0 | -0.007228837 | 0 | 0            | 0 |
| 0 | -0.030281772 | 0 | -0.082721053 | 0 | -0.007247817 | 0 | 0            | 0 |
| 0 | -0.023999809 | 0 | 0            | 0 | 0            | 0 | -0.063360714 | 0 |
| 0 | -0.017782802 | 0 | 0            | 0 | 0            | 0 | -0.059230642 | 0 |
| 0 | -0.028768954 | 0 | 0            | 0 | -0.088760054 | 0 | 0            | 0 |
| 0 | -0.019213657 | 0 | 0            | 0 | 0            | 0 | -0.061434061 | 0 |
| 0 | -0.02451828  | 0 | 0            | 0 | 0            | 0 | -0.058099321 | 0 |
| 0 | -0.025562935 | 0 | -0.078654085 | 0 | -0.022945243 | 0 | 0            | 0 |
| 0 | 0            | 0 | 0            | 0 | 0            | 0 | 0            | 0 |
| 0 | 0.039983793  | 0 | 0            | 0 | 0            | 0 | 0            | 0 |
| 0 | -0.025340985 | 0 | 0            | 0 | 0            | 0 | 0            | 0 |
| 0 | -0.025072195 | 0 | 0            | 0 | 0            | 0 | 0            | 0 |
| 0 | -0.20309061  | 0 | 0            | 0 | 0            | 0 | 0.006885955  | 0 |
| 0 | -0.029388996 | 0 | 0            | 0 | 0            | 0 | 0            | 0 |
| 0 | -0.022066379 | 0 | 0            | 0 | 0            | 0 | 0            | 0 |
| 0 | 0            | 0 | -0.10408922  | 0 | 0            | 0 | 0            | 0 |
| 0 | -0.022577004 | 0 | 0            | 0 | 0            | 0 | -0.057208316 | 0 |
| 0 | 0.10025497   | 0 | -0.1045711   | 0 | 0            | 0 | 0            | 0 |
| 0 | 0            | 0 | 0            | 0 | -0.10076676  | 0 | 0            | 0 |
| 0 | 0.099826363  | 0 | 0            | 0 | -0.10127519  | 0 | 0            | 0 |
| 0 | 0            | 0 | -0.10738225  | 0 | 0            | 0 | -0.03093143  | 0 |
| 0 | 0            | 0 | -0.11330299  | 0 | 0            | 0 | -0.032104659 | 0 |
| 0 | 0.033234825  | 0 | -0.11344712  | 0 | 0            | 0 | -0.032295517 | 0 |
| 0 | 0.096959144  | 0 | -0.10788722  | 0 | 0            | 0 | -0.031006162 | 0 |
| 0 | 0            | 0 | -0.11562366  | 0 | 0            | 0 | -0.041391959 | 0 |
| 0 | 0            | 0 | 0            | 0 | -0.11023729  | 0 | -0.031022031 | 0 |
| 0 | 0.033785807  | 0 | 0            | 0 | -0.11038384  | 0 | -0.031213567 | 0 |
| 0 | 0            | 0 | 0            | 0 | -0.10326478  | 0 | -0.029721815 | 0 |
| 0 | 0            | 0 | -0.11109267  | 0 | -0.005367854 | 0 | -0.038379627 | 0 |
| 0 | -0.10834401  | 0 | -0.10647007  | 0 | 0            | 0 | 0            | 0 |
| 0 | 0            | 0 | -0.1147446   | 0 | 0.008595667  | 0 | 0            | 0 |
| 0 | 0.096922546  | 0 | 0            | 0 | -0.10379529  | 0 | -0.029796833 | 0 |
| 0 | -0.112811    | 0 | -0.11203389  | 0 | 0            | 0 | 0            | 0 |
| 0 | 0            | 0 | -0.10404154  | 0 | -0.008542871 | 0 | 0            | 0 |
| 0 | 0.10179922   | 0 | -0.11476131  | 0 | 0.008079992  | 0 | 0            | 0 |
| 0 | 0.042034424  | 0 | -0.10410659  | 0 | -0.008633424 | 0 | 0            | 0 |
| 0 | 0            | 0 | 0            | 0 | -0.11248831  | 0 | -0.040189976 | 0 |
| 0 | -0.10963577  | 0 | 0            | 0 | -0.10279373  | 0 | 0            | 0 |
| 0 | -0.11363026  | 0 | 0            | 0 | -0.10934478  | 0 | 0            | 0 |
| 0 | 0            | 0 | -0.10563626  | 0 | -0.010403959 | 0 | 0            | 0 |
| 0 | -0.1566249   | 0 | -0.090224702 | 0 | 0            | 0 | -0.020717978 | 0 |
| 0 | 0            | 0 | -0.088436416 | 0 | 0            | 0 | -0.020359582 | 0 |
| 0 | 0            | 0 | -0.12056385  | 0 | 0.03179897   | 0 | -0.020874621 | 0 |
| 0 | 0.06217885   | 0 | -0.088982716 | 0 | 0            | 0 | -0.020552805 | 0 |
| 0 | 0.066320451  | 0 | -0.12056329  | 0 | 0.03114703   | 0 | -0.021057322 | 0 |
| 0 | 0            | 0 | -0.1190017   | 0 | 0.000441107  | 0 | -0.03563837  | 0 |
| 0 | -0.15236689  | 0 | -0.089072803 | 0 | 0            | 0 | 0            | 0 |

|   |             |   |              |   |              |   |              |   |
|---|-------------|---|--------------|---|--------------|---|--------------|---|
| 0 | -0.14911245 | 0 | -0.11639351  | 0 | 0.026634877  | 0 | 0            | 0 |
| 0 | 0           | 0 | -0.11574126  | 0 | 0.027936784  | 0 | 0            | 0 |
| 0 | -0.12986008 | 0 | -0.11852684  | 0 | 0            | 0 | -0.023970094 | 0 |
| 0 | 0.068613742 | 0 | -0.11563947  | 0 | 0.027251268  | 0 | 0            | 0 |
| 0 | 0           | 0 | -0.1155299   | 0 | -0.003329302 | 0 | -0.02379494  | 0 |
| 0 | 0.020477535 | 0 | -0.11559798  | 0 | -0.003375126 | 0 | -0.024017818 | 0 |
| 0 | 0           | 0 | -0.051591002 | 0 | 0            | 0 | -0.071175445 | 0 |
| 0 | 0           | 0 | -0.074721751 | 0 | 0.02432306   | 0 | -0.07316053  | 0 |
| 0 | 0.005879525 | 0 | -0.051595506 | 0 | 0            | 0 | -0.071595368 | 0 |
| 0 | 0           | 0 | -0.05163215  | 0 | 0            | 0 | -0.073147642 | 0 |
| 0 | -0.20444125 | 0 | -0.05070025  | 0 | 0            | 0 | -0.070708776 | 0 |
| 0 | -0.1573691  | 0 | 0            | 0 | -0.085390206 | 0 | -0.019807509 | 0 |
| 0 | -0.16069644 | 0 | -0.0958306   | 0 | 0            | 0 | -0.019585206 | 0 |
| 0 | 0           | 0 | 0            | 0 | -0.08335411  | 0 | -0.019446849 | 0 |
| 0 | 0           | 0 | -0.050042141 | 0 | 0            | 0 | -0.070786272 | 0 |
| 0 | 0           | 0 | -0.05777868  | 0 | 0            | 0 | -0.070758926 | 0 |
| 0 | 0.012902582 | 0 | -0.050107644 | 0 | 0            | 0 | -0.071246118 | 0 |
| 0 | 0           | 0 | -0.075570964 | 0 | 0.026529047  | 0 | -0.072837082 | 0 |
| 0 | 0           | 0 | -0.074983207 | 0 | 0.026002045  | 0 | -0.07118     | 0 |
| 0 | 0.000782237 | 0 | -0.074931018 | 0 | 0.025903445  | 0 | -0.071583979 | 0 |
| 0 | 0           | 0 | -0.11562041  | 0 | 0.020594185  | 0 | -0.019566055 | 0 |
| 0 | 0.033329961 | 0 | -0.058268637 | 0 | 0            | 0 | -0.071259562 | 0 |
| 0 | 0.062609048 | 0 | 0            | 0 | -0.083927075 | 0 | -0.019647674 | 0 |
| 0 | 0           | 0 | 0            | 0 | -0.047922157 | 0 | -0.070881443 | 0 |
| 0 | -0.20797624 | 0 | -0.062456644 | 0 | 0            | 0 | -0.070662633 | 0 |
| 0 | 0.026771355 | 0 | -0.11572184  | 0 | 0.020532037  | 0 | -0.019815812 | 0 |
| 0 | 0.005992124 | 0 | 0            | 0 | -0.047920149 | 0 | -0.071291748 | 0 |
| 0 | 0           | 0 | 0            | 0 | -0.047946406 | 0 | -0.072784474 | 0 |
| 0 | -0.20316608 | 0 | 0            | 0 | -0.046931056 | 0 | -0.070421286 | 0 |
| 0 | -0.1246212  | 0 | -0.11120751  | 0 | -0.006469637 | 0 | 0            | 0 |
| 0 | -0.15371322 | 0 | 0            | 0 | -0.084294753 | 0 | 0            | 0 |
| 0 | 0           | 0 | 0            | 0 | -0.046124054 | 0 | -0.070516679 | 0 |
| 0 | 0.01227609  | 0 | 0            | 0 | -0.046222799 | 0 | -0.070969869 | 0 |
| 0 | 0           | 0 | -0.075427003 | 0 | 0.013894101  | 0 | -0.071005226 | 0 |
| 0 | -0.1538362  | 0 | -0.11176282  | 0 | 0.016124341  | 0 | 0            | 0 |
| 0 | 0           | 0 | 0            | 0 | -0.054514224 | 0 | -0.07038958  | 0 |
| 0 | 0.012241617 | 0 | -0.075430726 | 0 | 0.013761382  | 0 | -0.071431019 | 0 |
| 0 | 0.033344144 | 0 | 0            | 0 | -0.055043877 | 0 | -0.070881697 | 0 |
| 0 | 0           | 0 | -0.076472869 | 0 | 0.014163973  | 0 | -0.075323929 | 0 |
| 0 | -0.13075033 | 0 | 0            | 0 | -0.11528399  | 0 | -0.022728567 | 0 |
| 0 | -0.20682    | 0 | 0            | 0 | -0.059519133 | 0 | -0.070236191 | 0 |
| 0 | -0.1520264  | 0 | -0.11677127  | 0 | 0.012382986  | 0 | -0.019592895 | 0 |
| 0 | 0           | 0 | -0.11780195  | 0 | 0.02028244   | 0 | -0.026274008 | 0 |
| 0 | -0.16177866 | 0 | 0            | 0 | -0.09131153  | 0 | -0.018589575 | 0 |
| 0 | -0.20727502 | 0 | -0.065704801 | 0 | 0            | 0 | -0.069290152 | 0 |
| 0 | 0           | 0 | -0.08297222  | 0 | 0.018445907  | 0 | -0.069674534 | 0 |
| 0 | 0.048411222 | 0 | -0.082758896 | 0 | 0.017579288  | 0 | -0.07018554  | 0 |

|   |              |   |              |   |              |   |              |   |
|---|--------------|---|--------------|---|--------------|---|--------------|---|
| 0 | -0.20592508  | 0 | 0            | 0 | -0.062612122 | 0 | -0.068823189 | 0 |
| 0 | -0.19239434  | 0 | 0            | 0 | 0            | 0 | -0.072719873 | 0 |
| 0 | -0.19233235  | 0 | 0            | 0 | 0            | 0 | -0.07230643  | 0 |
| 0 | 0            | 0 | 0            | 0 | 0            | 0 | -0.072747175 | 0 |
| 0 | 0            | 0 | -0.071731218 | 0 | 0            | 0 | -0.056802457 | 0 |
| 0 | 0.019438349  | 0 | 0            | 0 | 0            | 0 | -0.073198247 | 0 |
| 0 | 0.059627741  | 0 | -0.072377896 | 0 | 0            | 0 | -0.056942173 | 0 |
| 0 | -0.20130495  | 0 | -0.052548998 | 0 | 0            | 0 | -0.067197479 | 0 |
| 0 | 0            | 0 | -0.051750394 | 0 | 0            | 0 | -0.067311635 | 0 |
| 0 | 0            | 0 | 0            | 0 | -0.068666558 | 0 | -0.055693867 | 0 |
| 0 | 0.013508472  | 0 | -0.051787794 | 0 | 0            | 0 | -0.067768968 | 0 |
| 0 | 0            | 0 | -0.070221766 | 0 | 0.019205465  | 0 | -0.069289871 | 0 |
| 0 | -0.004027857 | 0 | -0.068785896 | 0 | 0.017514846  | 0 | -0.067964818 | 0 |
| 0 | 0            | 0 | -0.068718939 | 0 | 0.017463417  | 0 | -0.067572095 | 0 |
| 0 | -0.20409241  | 0 | -0.054309254 | 0 | 0            | 0 | -0.066275208 | 0 |
| 0 | 0.060432512  | 0 | 0            | 0 | -0.069342993 | 0 | -0.055829268 | 0 |
| 0 | 0            | 0 | 0            | 0 | 0            | 0 | -0.035099792 | 0 |
| 0 | -0.200213    | 0 | 0            | 0 | -0.049403215 | 0 | -0.066891282 | 0 |
| 0 | -0.2186753   | 0 | -0.070915663 | 0 | 0            | 0 | -0.0441264   | 0 |
| 0 | 0            | 0 | 0            | 0 | -0.048382219 | 0 | -0.067021343 | 0 |
| 0 | -0.21549335  | 0 | -0.080102583 | 0 | 0            | 0 | -0.052205793 | 0 |
| 0 | 0.012824463  | 0 | 0            | 0 | -0.048450275 | 0 | -0.0674756   | 0 |
| 0 | -0.20360207  | 0 | -0.078892348 | 0 | -0.001296895 | 0 | -0.068789336 | 0 |
| 0 | -0.20249289  | 0 | -0.066480855 | 0 | 0.012324786  | 0 | -0.066468923 | 0 |
| 0 | 0            | 0 | -0.069076496 | 0 | 0.015960483  | 0 | -0.06663605  | 0 |
| 0 | -0.19393274  | 0 | 0            | 0 | 0            | 0 | -0.072369951 | 0 |
| 0 | 0.019520717  | 0 | -0.06870559  | 0 | 0.015497974  | 0 | -0.067085966 | 0 |
| 0 | -0.20292344  | 0 | 0            | 0 | -0.051222137 | 0 | -0.065966935 | 0 |
| 0 | 0.12276889   | 0 | 0            | 0 | 0            | 0 | -0.035199131 | 0 |
| 0 | 0            | 0 | -0.098824045 | 0 | 0.029634218  | 0 | -0.044663667 | 0 |
| 0 | 0            | 0 | -0.089406672 | 0 | 0.010058056  | 0 | -0.052396304 | 0 |
| 0 | 0.022844117  | 0 | -0.089531349 | 0 | 0.009986444  | 0 | -0.052724819 | 0 |
| 0 | -0.21474951  | 0 | -0.075900909 | 0 | 0            | 0 | -0.051187794 | 0 |
| 0 | 0.051770876  | 0 | -0.098742737 | 0 | 0.02885819   | 0 | -0.044941773 | 0 |
| 0 | -0.21617119  | 0 | -0.099618241 | 0 | 0.026464354  | 0 | -0.046796155 | 0 |
| 0 | -0.21440777  | 0 | 0            | 0 | -0.077540754 | 0 | -0.051055739 | 0 |
| 0 | 0            | 0 | -0.097184667 | 0 | 0.022699198  | 0 | -0.051518939 | 0 |
| 0 | -0.21745483  | 0 | 0            | 0 | -0.067173564 | 0 | -0.04259667  | 0 |
| 0 | 0            | 0 | -0.092158613 | 0 | 0.010447996  | 0 | -0.058347985 | 0 |
| 0 | -0.2176281   | 0 | -0.09626246  | 0 | 0.019180595  | 0 | -0.042664851 | 0 |
| 0 | 0.06395921   | 0 | -0.097209963 | 0 | 0.022028533  | 0 | -0.05163474  | 0 |
| 0 | -0.20566308  | 0 | -0.07507368  | 0 | 0.008217822  | 0 | -0.065505773 | 0 |
| 0 | -0.20572595  | 0 | -0.067098425 | 0 | 0            | 0 | -0.065419923 | 0 |
| 0 | -0.21347484  | 0 | 0            | 0 | -0.072680138 | 0 | -0.049871844 | 0 |
| 0 | 0            | 0 | -0.074662795 | 0 | 0.008284173  | 0 | -0.065697773 | 0 |
| 0 | -0.11723049  | 0 | 0            | 0 | 0            | 0 | 0            | 0 |
| 0 | -0.20459432  | 0 | 0            | 0 | -0.06451135  | 0 | -0.064956943 | 0 |

|   |             |   |              |   |              |   |              |   |
|---|-------------|---|--------------|---|--------------|---|--------------|---|
| 0 | 0.048834026 | 0 | -0.07435706  | 0 | 0.007397137  | 0 | -0.066197431 | 0 |
| 0 | 0           | 0 | -0.12142693  | 0 | 0            | 0 | -0.016631713 | 0 |
| 0 | -0.13799825 | 0 | -0.12183723  | 0 | 0            | 0 | -0.016830941 | 0 |
| 0 | 0           | 0 | -0.11287389  | 0 | -0.00960585  | 0 | -0.016593476 | 0 |
| 0 | -0.13358686 | 0 | -0.12033853  | 0 | 0            | 0 | 0            | 0 |
| 0 | -0.18887498 | 0 | 0            | 0 | 0            | 0 | -0.068800439 | 0 |
| 0 | 0.12706365  | 0 | -0.12216991  | 0 | 0            | 0 | -0.016600388 | 0 |
| 0 | 0           | 0 | -0.11169359  | 0 | -0.009282236 | 0 | 0            | 0 |
| 0 | -0.13401    | 0 | -0.10983386  | 0 | -0.011658266 | 0 | 0            | 0 |
| 0 | 0.12871984  | 0 | -0.11284744  | 0 | -0.010436551 | 0 | -0.016556141 | 0 |
| 0 | 0.12829326  | 0 | -0.11171598  | 0 | -0.010037434 | 0 | 0            | 0 |
| 0 | -0.21825903 | 0 | -0.054925198 | 0 | 0            | 0 | 0            | 0 |
| 0 | -0.22094524 | 0 | -0.060608155 | 0 | 0            | 0 | 0            | 0 |
| 0 | -0.21757413 | 0 | -0.053434683 | 0 | 0            | 0 | 0            | 0 |
| 0 | -0.21355097 | 0 | -0.09668505  | 0 | 0.009251615  | 0 | -0.04369093  | 0 |
| 0 | 0           | 0 | -0.054239589 | 0 | 0            | 0 | 0            | 0 |
| 0 | 0           | 0 | 0            | 0 | -0.11848844  | 0 | -0.015397137 | 0 |
| 0 | -0.13879311 | 0 | 0            | 0 | -0.11898784  | 0 | -0.015595868 | 0 |
| 0 | -0.21639794 | 0 | -0.066880081 | 0 | 0.013850539  | 0 | 0            | 0 |
| 0 | -0.20289746 | 0 | -0.068235139 | 0 | -0.009653764 | 0 | -0.06459533  | 0 |
| 0 | 0           | 0 | -0.066246383 | 0 | 0.012334953  | 0 | 0            | 0 |
| 0 | -0.21721407 | 0 | 0            | 0 | -0.052137127 | 0 | 0            | 0 |
| 0 | 0.041487233 | 0 | -0.054255631 | 0 | 0            | 0 | 0            | 0 |
| 0 | 0.029612655 | 0 | -0.066187375 | 0 | 0.012297636  | 0 | 0            | 0 |
| 0 | -0.13466268 | 0 | 0            | 0 | -0.11763874  | 0 | 0            | 0 |
| 0 | 0           | 0 | -0.06864583  | 0 | 0.016451795  | 0 | 0            | 0 |
| 0 | 0           | 0 | -0.070116684 | 0 | 0.010344231  | 0 | 0            | 0 |
| 0 | -0.21627989 | 0 | 0            | 0 | -0.050357206 | 0 | 0            | 0 |
| 0 | -0.21979031 | 0 | 0            | 0 | -0.05806727  | 0 | 0            | 0 |
| 0 | 0           | 0 | 0            | 0 | -0.051269479 | 0 | 0            | 0 |
| 0 | -0.2229496  | 0 | -0.065913847 | 0 | 0            | 0 | 0            | 0 |
| 0 | 0.03788907  | 0 | -0.068148862 | 0 | 0.015868259  | 0 | 0            | 0 |
| 0 | 0.1264581   | 0 | 0            | 0 | -0.11926817  | 0 | -0.01536134  | 0 |
| 0 | -0.21981164 | 0 | -0.067402318 | 0 | 0.002502596  | 0 | 0            | 0 |
| 0 | -0.22319783 | 0 | -0.08095186  | 0 | 0.015741873  | 0 | 0            | 0 |
| 0 | 0.04058818  | 0 | 0            | 0 | -0.051333129 | 0 | 0            | 0 |
| 0 | 0.05709386  | 0 | -0.06972684  | 0 | 0.009357528  | 0 | 0            | 0 |
| 0 | 0           | 0 | -0.064375017 | 0 | 0.009757555  | 0 | 0            | 0 |
| 0 | 0           | 0 | -0.077639544 | 0 | 0.012684544  | 0 | 0            | 0 |
| 0 | -0.1306602  | 0 | 0            | 0 | 0            | 0 | -0.02895998  | 0 |
| 0 | -0.22186369 | 0 | 0            | 0 | -0.06362536  | 0 | 0            | 0 |
| 0 | 0.063809095 | 0 | -0.077578011 | 0 | 0.01193308   | 0 | 0            | 0 |
| 0 | -0.22208761 | 0 | -0.077347938 | 0 | 0.005243722  | 0 | 0            | 0 |
| 0 | -0.16156572 | 0 | 0            | 0 | 0            | 0 | -0.022884988 | 0 |
| 0 | -0.21901147 | 0 | -0.074779122 | 0 | 0.007470777  | 0 | 0            | 0 |
| 0 | -0.22135249 | 0 | -0.08348664  | 0 | 0.014874009  | 0 | 0            | 0 |
| 0 | -0.19910413 | 0 | 0            | 0 | 0            | 0 | -0.050180719 | 0 |

|   |              |   |              |   |              |              |              |
|---|--------------|---|--------------|---|--------------|--------------|--------------|
| 0 | -0.21464295  | 0 | -0.054891213 | 0 | 0            | 0            | 0            |
| 0 | -0.13967091  | 0 | 0            | 0 | 0            | -0.029171241 | 0            |
| 0 | -0.21310918  | 0 | -0.061631243 | 0 | 0.006661983  | 0            | 0            |
| 0 | -0.20507004  | 0 | 0            | 0 | 0            | 0            | 0            |
| 0 | 0            | 0 | -0.064088593 | 0 | 0.010129672  | 0            | 0            |
| 0 | -0.21354755  | 0 | 0            | 0 | -0.052281751 | 0            | 0            |
| 0 | -0.21562829  | 0 | -0.062442086 | 0 | 0.006002244  | 0            | 0            |
| 0 | 0.037285553  | 0 | -0.063644349 | 0 | 0.009633981  | 0            | 0            |
| 0 | -0.21708199  | 0 | -0.067517118 | 0 | -0.001116641 | 0            | 0            |
| 0 | -0.216443    | 0 | -0.093333912 | 0 | 0            | -0.035429676 | 0            |
| 0 | -0.18272096  | 0 | -0.11878252  | 0 | 0.01382917   | 0            | 0            |
| 0 | -0.18399442  | 0 | -0.10557471  | 0 | 0            | -0.002767244 | 0            |
| 0 | -0.21697962  | 0 | -0.095052276 | 0 | 0.001183195  | 0            | -0.035467576 |
| 0 | 0            | 0 | -0.096580076 | 0 | 0.003725995  | 0            | -0.035580187 |
| 0 | 0            | 0 | -0.11954991  | 0 | 0.014542102  | 0            | -0.002565363 |
| 0 | 0.094731735  | 0 | -0.096609425 | 0 | 0.002831573  | 0            | -0.035555769 |
| 0 | 0.096388291  | 0 | -0.11951479  | 0 | 0.013650819  | 0            | -0.002639749 |
| 0 | -0.21530681  | 0 | 0            | 0 | -0.091066886 | 0            | -0.033993708 |
| 0 | -0.1852379   | 0 | 0            | 0 | -0.10137717  | 0            | -0.001593687 |
| 0 | 0            | 0 | -0.11233555  | 0 | -0.027765426 | 0            | -0.020110939 |
| 0 | -0.2210165   | 0 | -0.086969033 | 0 | 0.000553671  | 0            | 0            |
| 0 | -0.21949805  | 0 | -0.10628169  | 0 | 0.014169659  | 0            | -0.019657209 |
| 0 | -0.16389771  | 0 | -0.1048695   | 0 | -0.037023474 | 0            | 0            |
| 0 | -0.16516675  | 0 | -0.10424732  | 0 | -0.038368756 | 0            | -0.003481076 |
| 0 | -0.1654331   | 0 | -0.14059684  | 0 | 0            | -0.003562065 | 0            |
| 0 | 0            | 0 | -0.10550759  | 0 | -0.036996102 | 0            | -0.003160641 |
| 0 | 0.025823886  | 0 | -0.10560623  | 0 | -0.037057038 | 0            | -0.003427598 |
| 0 | -0.16553667  | 0 | 0            | 0 | -0.13899977  | 0            | -0.002450214 |
| 0 | -0.21537424  | 0 | -0.094606911 | 0 | -0.024461793 | 0            | -0.018603599 |
| 0 | -0.1930699   | 0 | -0.11033029  | 0 | -0.016761962 | 0            | 0.004082008  |
| 0 | -0.23261738  | 0 | -0.10914557  | 0 | 0.014056019  | 0            | 0.010102652  |
| 0 | -0.16085165  | 0 | 0            | 0 | 0            | -0.011744903 | 0            |
| 0 | 0            | 0 | -0.090310318 | 0 | 0.016836696  | 0            | -0.060632657 |
| 0 | 0            | 0 | -0.074317797 | 0 | 0            | -0.061106463 | 0            |
| 0 | 0            | 0 | -0.074313934 | 0 | 0            | -0.059699234 | 0            |
| 0 | 0.003123249  | 0 | -0.074304483 | 0 | 0            | -0.059760383 | 0            |
| 0 | 0            | 0 | -0.073308243 | 0 | 0            | -0.059364934 | 0            |
| 0 | 0.012303154  | 0 | -0.073320894 | 0 | 0            | -0.059446468 | 0            |
| 0 | 0            | 0 | -0.09126161  | 0 | 0.018626998  | 0            | -0.060884968 |
| 0 | 0            | 0 | -0.090522362 | 0 | 0.017881889  | 0            | -0.059663138 |
| 0 | -0.000310879 | 0 | -0.090531999 | 0 | 0.017885094  | 0            | -0.059711061 |
| 0 | -0.025700988 | 0 | -0.073572814 | 0 | 0            | -0.059460122 | 0            |
| 0 | 0            | 0 | -0.080110438 | 0 | 0            | -0.05930309  | 0            |
| 0 | 0.029490366  | 0 | -0.080239607 | 0 | 0            | -0.059421872 | 0            |
| 0 | -0.028812125 | 0 | -0.084086792 | 0 | 0            | -0.059373059 | 0            |
| 0 | 0            | 0 | -0.090995333 | 0 | 0.007218141  | 0            | -0.059456808 |
| 0 | 0.008917696  | 0 | -0.091062821 | 0 | 0.007252844  | 0            | -0.05952717  |



|   |              |   |              |   |              |   |              |   |
|---|--------------|---|--------------|---|--------------|---|--------------|---|
| 0 | 0            | 0 | -0.092217656 | 0 | 0.008176513  | 0 | -0.06292807  | 0 |
| 0 | 0            | 0 | 0            | 0 | -0.070369238 | 0 | -0.059276931 | 0 |
| 0 | 0.003291056  | 0 | 0            | 0 | -0.070370543 | 0 | -0.059335196 | 0 |
| 0 | 0            | 0 | 0            | 0 | -0.070345362 | 0 | -0.060592705 | 0 |
| 0 | 0            | 0 | 0            | 0 | -0.069176698 | 0 | -0.058969311 | 0 |
| 0 | 0.011260212  | 0 | 0            | 0 | -0.069194397 | 0 | -0.059047511 | 0 |
| 0 | -0.025387072 | 0 | 0            | 0 | -0.069560845 | 0 | -0.059045738 | 0 |
| 0 | 0            | 0 | 0            | 0 | -0.076592673 | 0 | -0.058818515 | 0 |
| 0 | 0.029149907  | 0 | 0            | 0 | -0.076732355 | 0 | -0.0589352   | 0 |
| 0 | 0            | 0 | -0.09741759  | 0 | 0.011754653  | 0 | -0.058276996 | 0 |
| 0 | -0.026122629 | 0 | -0.086201112 | 0 | 0            | 0 | -0.058151843 | 0 |
| 0 | 0.040739728  | 0 | -0.097365211 | 0 | 0.011522886  | 0 | -0.058405078 | 0 |
| 0 | -0.028551113 | 0 | 0            | 0 | -0.080793621 | 0 | -0.058833886 | 0 |
| 0 | -0.025817851 | 0 | 0            | 0 | -0.082885517 | 0 | -0.057575576 | 0 |
| 0 | -0.020694138 | 0 | -0.093994119 | 0 | -0.004758166 | 0 | -0.057544315 | 0 |
| 0 | 0            | 0 | -0.074469621 | 0 | 0            | 0 | -0.055838683 | 0 |
| 0 | 0.011506765  | 0 | -0.074476574 | 0 | 0            | 0 | -0.055913297 | 0 |
| 0 | 0            | 0 | -0.086033287 | 0 | 0.01198712   | 0 | -0.057157027 | 0 |
| 0 | -0.006795975 | 0 | -0.084560925 | 0 | 0.010212134  | 0 | -0.056037165 | 0 |
| 0 | 0            | 0 | -0.08439321  | 0 | 0.010046606  | 0 | -0.056016074 | 0 |
| 0 | -0.022692304 | 0 | -0.074878637 | 0 | 0            | 0 | -0.055906835 | 0 |
| 0 | 0            | 0 | 0            | 0 | -0.070871312 | 0 | -0.055438366 | 0 |
| 0 | 0.010456729  | 0 | 0            | 0 | -0.070883109 | 0 | -0.055509618 | 0 |
| 0 | -0.023684902 | 0 | 0            | 0 | -0.071475319 | 0 | -0.055481616 | 0 |
| 0 | -0.02855057  | 0 | -0.077119312 | 0 | 0            | 0 | -0.054860826 | 0 |
| 0 | 0            | 0 | -0.083443452 | 0 | 0.006675437  | 0 | -0.054932277 | 0 |
| 0 | 0.019263204  | 0 | -0.083345999 | 0 | 0.006557801  | 0 | -0.055032595 | 0 |
| 0 | 0            | 0 | -0.077467698 | 0 | 0            | 0 | 0            | 0 |
| 0 | 0.035181667  | 0 | -0.077480176 | 0 | 0            | 0 | 0            | 0 |
| 0 | -0.026942997 | 0 | -0.080804542 | 0 | 0.003402747  | 0 | -0.054959347 | 0 |
| 0 | -0.030250878 | 0 | -0.077758035 | 0 | 0            | 0 | 0            | 0 |
| 0 | 0            | 0 | -0.083999599 | 0 | 0.006584941  | 0 | 0            | 0 |
| 0 | 0.022616489  | 0 | -0.083992231 | 0 | 0.006577361  | 0 | 0            | 0 |
| 0 | 0            | 0 | -0.086048834 | 0 | 0.009759144  | 0 | 0            | 0 |
| 0 | -0.029311143 | 0 | -0.076801623 | 0 | 0            | 0 | 0            | 0 |
| 0 | 0.032878432  | 0 | -0.085932101 | 0 | 0.00961361   | 0 | 0            | 0 |
| 0 | -0.028296455 | 0 | -0.084280236 | 0 | 0.007589536  | 0 | 0            | 0 |
| 0 | -0.03248537  | 0 | -0.08312411  | 0 | 0            | 0 | 0            | 0 |
| 0 | 0            | 0 | -0.087513253 | 0 | 0.004601923  | 0 | 0            | 0 |
| 0 | 0.048833379  | 0 | -0.087350072 | 0 | 0.004244261  | 0 | 0            | 0 |
| 0 | -0.02814398  | 0 | 0            | 0 | -0.073907698 | 0 | -0.054436321 | 0 |
| 0 | -0.026784664 | 0 | -0.089036035 | 0 | 0            | 0 | -0.054167872 | 0 |
| 0 | 0            | 0 | -0.08999827  | 0 | 0.001014666  | 0 | -0.054183746 | 0 |
| 0 | 0            | 0 | -0.082841668 | 0 | 0.004788352  | 0 | 0            | 0 |
| 0 | 0.04460113   | 0 | -0.089982108 | 0 | 0.000821049  | 0 | -0.054309857 | 0 |
| 0 | -0.029497452 | 0 | -0.088168254 | 0 | 0.000685414  | 0 | -0.054089332 | 0 |
| 0 | 0            | 0 | 0            | 0 | -0.074108697 | 0 | 0            | 0 |

|   |              |   |              |              |              |              |              |
|---|--------------|---|--------------|--------------|--------------|--------------|--------------|
| 0 | 0.033868677  | 0 | 0            | -0.07413453  | 0            | 0            | 0            |
| 0 | -0.029714022 | 0 | 0            | -0.074531188 | 0            | 0            | 0            |
| 0 | -0.031069282 | 0 | -0.084820349 | 0            | -0.002415564 | 0            | 0            |
| 0 | -0.028897928 | 0 | 0            | -0.073370173 | 0            | 0            | 0            |
| 0 | 0            | 0 | 0            | 0            | 0            | -0.062913133 | 0            |
| 0 | 0.018561057  | 0 | 0            | 0            | 0            | -0.063000677 | 0            |
| 0 | -0.032346489 | 0 | 0            | -0.080207207 | 0            | 0            | 0            |
| 0 | -0.022937043 | 0 | 0            | 0            | 0            | -0.062728921 | 0            |
| 0 | -0.022906405 | 0 | 0            | 0            | 0            | -0.063046024 | 0            |
| 0 | -0.027495943 | 0 | -0.090970128 | 0            | 0.00244381   | 0            | 0            |
| 0 | -0.026467412 | 0 | 0            | -0.086183207 | 0            | -0.053598726 | 0            |
| 0 | -0.023182415 | 0 | -0.083784503 | 0            | -0.015832021 | 0            | -0.053279231 |
| 0 | -0.026792744 | 0 | -0.077661825 | 0            | 0            | 0            | 0            |
| 0 | 0            | 0 | -0.081480505 | 0            | 0.004039779  | 0            | 0            |
| 0 | 0.030795174  | 0 | -0.081386217 | 0            | 0.003925782  | 0            | 0            |
| 0 | -0.02714847  | 0 | 0            | 0            | 0            | -0.062854314 | 0            |
| 0 | -0.025189208 | 0 | -0.078984981 | 0            | 0.000960972  | 0            | 0            |
| 0 | -0.026463969 | 0 | 0            | -0.074685374 | 0            | 0            | 0            |
| 0 | -0.030971374 | 0 | -0.078370852 | 0            | -0.001785012 | 0            | 0            |
| 0 | -0.029073163 | 0 | -0.084537408 | 0            | -0.00688498  | 0            | 0            |
| 0 | -0.019580833 | 0 | 0            | 0            | 0            | -0.059124431 | 0            |
| 0 | -0.027283165 | 0 | 0            | 0            | 0            | 0            | 0            |
| 0 | 0            | 0 | -0.10478332  | 0            | 0            | -0.036606713 | 0            |
| 0 | 0.094643934  | 0 | -0.1052627   | 0            | 0            | -0.036696489 | 0            |
| 0 | 0            | 0 | 0            | -0.10098704  | 0            | -0.035546544 | 0            |
| 0 | 0.09449721   | 0 | 0            | -0.10149398  | 0            | -0.035621154 | 0            |
| 0 | -0.10149862  | 0 | -0.10398398  | 0            | 0            | 0            | 0            |
| 0 | 0            | 0 | -0.10820764  | 0            | 0.004345592  | 0            | 0            |
| 0 | 0.10035504   | 0 | -0.10822303  | 0            | 0.003846568  | 0            | 0            |
| 0 | -0.10256194  | 0 | 0            | -0.10066193  | 0            | 0            | 0            |
| 0 | -0.11400667  | 0 | -0.10726792  | 0            | 0            | -0.031034249 | 0            |
| 0 | 0            | 0 | -0.1204968   | 0            | 0.013816324  | 0            | -0.031068557 |
| 0 | -0.11881948  | 0 | -0.1131562   | 0            | 0            | -0.032223107 | 0            |
| 0 | 0            | 0 | -0.10912315  | 0            | -0.004388412 | 0            | -0.032070677 |
| 0 | 0.033223931  | 0 | -0.10921442  | 0            | -0.00444395  | 0            | -0.032260021 |
| 0 | 0.09728782   | 0 | -0.12052097  | 0            | 0.013309552  | 0            | -0.031137252 |
| 0 | 0            | 0 | -0.1127147   | 0            | -0.003054864 | 0            | -0.041359063 |
| 0 | -0.11950144  | 0 | 0            | -0.11008876  | 0            | -0.031142845 | 0            |
| 0 | -0.11514522  | 0 | 0            | -0.10314206  | 0            | -0.029836208 | 0            |
| 0 | -0.10835435  | 0 | -0.11463834  | 0            | 0.008607628  | 0            | 0            |
| 0 | -0.11275765  | 0 | -0.10395744  | 0            | -0.008481962 | 0            | 0            |
| 0 | -0.15934031  | 0 | -0.088410105 | 0            | 0            | -0.020636473 | 0            |
| 0 | -0.156244    | 0 | -0.1204374   | 0            | 0.031629889  | 0            | -0.02114676  |
| 0 | 0            | 0 | -0.11970608  | 0            | 0.032789176  | 0            | -0.02079791  |
| 0 | 0.063246269  | 0 | -0.11967024  | 0            | 0.032178843  | 0            | -0.020986372 |
| 0 | -0.1519766   | 0 | -0.11550453  | 0            | 0.027704764  | 0            | 0            |
| 0 | -0.20634566  | 0 | -0.052001805 | 0            | 0            | -0.070982438 | 0            |

|   |             |   |              |   |              |   |              |   |
|---|-------------|---|--------------|---|--------------|---|--------------|---|
| 0 | -0.12983659 | 0 | -0.11544464  | 0 | -0.00323655  | 0 | -0.023944578 | 0 |
| 0 | 0           | 0 | -0.051323032 | 0 | 0            | 0 | -0.07106107  | 0 |
| 0 | -0.2091042  | 0 | -0.058138847 | 0 | 0            | 0 | -0.070556446 | 0 |
| 0 | -0.20548719 | 0 | -0.050434232 | 0 | 0            | 0 | -0.070583109 | 0 |
| 0 | 0.017111053 | 0 | -0.051356947 | 0 | 0            | 0 | -0.071532722 | 0 |
| 0 | 0           | 0 | -0.074675946 | 0 | 0.024325325  | 0 | -0.071435771 | 0 |
| 0 | 0.005853955 | 0 | -0.074606933 | 0 | 0.024254979  | 0 | -0.071850435 | 0 |
| 0 | 0           | 0 | -0.074916595 | 0 | 0.024543268  | 0 | -0.07345     | 0 |
| 0 | -0.16037215 | 0 | 0            | 0 | -0.0833319   | 0 | -0.019739717 | 0 |
| 0 | -0.20425151 | 0 | -0.07517065  | 0 | 0.025780585  | 0 | -0.07098314  | 0 |
| 0 | -0.20508125 | 0 | 0            | 0 | -0.048325451 | 0 | -0.070678541 | 0 |
| 0 | -0.16037094 | 0 | -0.11545023  | 0 | 0.020450672  | 0 | -0.019859238 | 0 |
| 0 | 0           | 0 | -0.076860991 | 0 | 0.028265273  | 0 | -0.071081982 | 0 |
| 0 | 0           | 0 | -0.078451761 | 0 | 0.021649154  | 0 | -0.070976433 | 0 |
| 0 | 0.013507202 | 0 | -0.076516048 | 0 | 0.027833745  | 0 | -0.071538807 | 0 |
| 0 | 0           | 0 | 0            | 0 | -0.04750559  | 0 | -0.070775308 | 0 |
| 0 | 0.034072776 | 0 | -0.078196783 | 0 | 0.020868702  | 0 | -0.071471076 | 0 |
| 0 | 0.016441027 | 0 | 0            | 0 | -0.047571971 | 0 | -0.071239692 | 0 |
| 0 | -0.20411646 | 0 | 0            | 0 | -0.046509866 | 0 | -0.07031166  | 0 |
| 0 | -0.2078911  | 0 | -0.075689885 | 0 | 0.013778246  | 0 | -0.070802986 | 0 |
| 0 | -0.20784868 | 0 | 0            | 0 | -0.054868078 | 0 | -0.070185269 | 0 |
| 0 | -0.20718347 | 0 | -0.083252205 | 0 | 0.018352887  | 0 | -0.069471155 | 0 |
| 0 | -0.21607566 | 0 | -0.072046462 | 0 | 0            | 0 | -0.056666042 | 0 |
| 0 | -0.19353542 | 0 | 0            | 0 | 0            | 0 | -0.072570179 | 0 |
| 0 | 0           | 0 | -0.091211412 | 0 | 0.020460752  | 0 | -0.056962429 | 0 |
| 0 | 0.060173884 | 0 | -0.091215316 | 0 | 0.019786424  | 0 | -0.057096956 | 0 |
| 0 | -0.21491508 | 0 | 0            | 0 | -0.06898041  | 0 | -0.055554267 | 0 |
| 0 | -0.20281517 | 0 | -0.052145636 | 0 | 0            | 0 | -0.067103198 | 0 |
| 0 | -0.20115245 | 0 | -0.068971126 | 0 | 0.017308428  | 0 | -0.067369737 | 0 |
| 0 | 0           | 0 | -0.071450113 | 0 | 0.020772013  | 0 | -0.067516208 | 0 |
| 0 | 0.013905586 | 0 | -0.071127189 | 0 | 0.020392518  | 0 | -0.067970737 | 0 |
| 0 | -0.20155354 | 0 | 0            | 0 | -0.048775079 | 0 | -0.066816711 | 0 |
| 0 | -0.12309621 | 0 | 0            | 0 | 0            | 0 | -0.035212789 | 0 |
| 0 | -0.2039932  | 0 | -0.069368782 | 0 | 0.015853673  | 0 | -0.066422043 | 0 |
| 0 | -0.21849343 | 0 | -0.099021867 | 0 | 0.029505144  | 0 | -0.044564024 | 0 |
| 0 | -0.21544006 | 0 | -0.08962693  | 0 | 0.009953206  | 0 | -0.052256165 | 0 |
| 0 | -0.21463963 | 0 | -0.097412382 | 0 | 0.022605026  | 0 | -0.051376711 | 0 |
| 0 | -0.20568062 | 0 | -0.074929643 | 0 | 0.008183108  | 0 | -0.065492724 | 0 |
| 0 | -0.13745254 | 0 | -0.1212494   | 0 | 0            | 0 | -0.016797523 | 0 |
| 0 | 0           | 0 | -0.11460829  | 0 | -0.007168608 | 0 | -0.016578842 | 0 |
| 0 | -0.137928   | 0 | -0.11278127  | 0 | -0.009514039 | 0 | -0.01676077  | 0 |
| 0 | -0.1334888  | 0 | -0.11156975  | 0 | -0.009221735 | 0 | 0            | 0 |
| 0 | 0.12683799  | 0 | -0.11462309  | 0 | -0.00793356  | 0 | -0.016542645 | 0 |
| 0 | -0.21932099 | 0 | -0.054657412 | 0 | 0            | 0 | 0            | 0 |
| 0 | -0.21810446 | 0 | -0.06655702  | 0 | 0.012228951  | 0 | 0            | 0 |
| 0 | -0.13833155 | 0 | 0            | 0 | -0.11830837  | 0 | -0.015566022 | 0 |
| 0 | -0.21756577 | 0 | -0.069085512 | 0 | 0.016475196  | 0 | 0            | 0 |

|   |              |   |              |   |              |   |              |   |
|---|--------------|---|--------------|---|--------------|---|--------------|---|
| 0 | -0.22091138  | 0 | -0.070446806 | 0 | 0.010299997  | 0 | 0            | 0 |
| 0 | 0            | 0 | -0.068240303 | 0 | 0.014759352  | 0 | 0            | 0 |
| 0 | -0.21810413  | 0 | 0            | 0 | -0.051681451 | 0 | 0            | 0 |
| 0 | 0.04182144   | 0 | -0.067728967 | 0 | 0.014199808  | 0 | 0            | 0 |
| 0 | -0.22289988  | 0 | -0.077870949 | 0 | 0.012571065  | 0 | 0            | 0 |
| 0 | -0.21458897  | 0 | -0.064418695 | 0 | 0.01004202   | 0 | 0            | 0 |
| 0 | -0.21642424  | 0 | -0.096806487 | 0 | 0.003635142  | 0 | -0.035446384 | 0 |
| 0 | -0.18389759  | 0 | -0.11936852  | 0 | 0.014432547  | 0 | -0.002932097 | 0 |
| 0 | -0.16491547  | 0 | -0.10541901  | 0 | -0.036789638 | 0 | -0.003419687 | 0 |
| 0 | 0            | 0 | -0.074051196 | 0 | 0            | 0 | -0.059597422 | 0 |
| 0 | 0.015095297  | 0 | -0.074059385 | 0 | 0            | 0 | -0.059687049 | 0 |
| 0 | 0            | 0 | -0.090777771 | 0 | 0.017363622  | 0 | -0.061325894 | 0 |
| 0 | 0            | 0 | -0.090240474 | 0 | 0.016800938  | 0 | -0.059883137 | 0 |
| 0 | 0.003110321  | 0 | -0.090278731 | 0 | 0.016839364  | 0 | -0.059940959 | 0 |
| 0 | -0.027724945 | 0 | -0.074325513 | 0 | 0            | 0 | -0.059694215 | 0 |
| 0 | 0            | 0 | -0.092208712 | 0 | 0.019935913  | 0 | -0.059581801 | 0 |
| 0 | 0.012736494  | 0 | -0.092194365 | 0 | 0.01990691   | 0 | -0.059658416 | 0 |
| 0 | -0.026782023 | 0 | -0.073318822 | 0 | 0            | 0 | -0.059358291 | 0 |
| 0 | -0.024347198 | 0 | -0.090534475 | 0 | 0.017882213  | 0 | -0.059664906 | 0 |
| 0 | 0            | 0 | -0.09375306  | 0 | 0.01429613   | 0 | -0.059450444 | 0 |
| 0 | -0.030260083 | 0 | -0.080118125 | 0 | 0            | 0 | -0.059296501 | 0 |
| 0 | 0.029993696  | 0 | -0.093689207 | 0 | 0.014093767  | 0 | -0.059569492 | 0 |
| 0 | 0            | 0 | 0            | 0 | -0.069996787 | 0 | -0.059196579 | 0 |
| 0 | 0.014049298  | 0 | 0            | 0 | -0.070008494 | 0 | -0.059280475 | 0 |
| 0 | -0.027377001 | 0 | -0.091028691 | 0 | 0.007231443  | 0 | -0.059423557 | 0 |
| 0 | -0.023930091 | 0 | 0            | 0 | -0.070359578 | 0 | -0.059272994 | 0 |
| 0 | -0.02634363  | 0 | 0            | 0 | -0.069188314 | 0 | -0.058964149 | 0 |
| 0 | -0.029935551 | 0 | 0            | 0 | -0.076599826 | 0 | -0.058811914 | 0 |
| 0 | -0.025635731 | 0 | -0.097442747 | 0 | 0.011765706  | 0 | -0.058280333 | 0 |
| 0 | 0            | 0 | -0.086628696 | 0 | 0.01288276   | 0 | -0.05596804  | 0 |
| 0 | 0.011761585  | 0 | -0.086820172 | 0 | 0.013025187  | 0 | -0.056046712 | 0 |
| 0 | -0.024252689 | 0 | -0.074480902 | 0 | 0            | 0 | -0.055832324 | 0 |
| 0 | -0.02021485  | 0 | -0.084516801 | 0 | 0.010168673  | 0 | -0.055994509 | 0 |
| 0 | -0.023909548 | 0 | 0            | 0 | -0.07088235  | 0 | -0.055432001 | 0 |
| 0 | -0.028554291 | 0 | -0.083455697 | 0 | 0.006676764  | 0 | -0.054925641 | 0 |
| 0 | -0.031051672 | 0 | -0.077479307 | 0 | 0            | 0 | 0            | 0 |
| 0 | 0            | 0 | -0.085725135 | 0 | 0.008710448  | 0 | 0            | 0 |
| 0 | 0.035384638  | 0 | -0.085605439 | 0 | 0.008568834  | 0 | 0            | 0 |
| 0 | -0.029963473 | 0 | -0.084007181 | 0 | 0.006578173  | 0 | 0            | 0 |
| 0 | -0.028836143 | 0 | -0.086141912 | 0 | 0.009830083  | 0 | 0            | 0 |
| 0 | -0.033337569 | 0 | -0.087646032 | 0 | 0.004726635  | 0 | 0            | 0 |
| 0 | -0.026784542 | 0 | -0.090006078 | 0 | 0.001014305  | 0 | -0.054177234 | 0 |
| 0 | -0.030659744 | 0 | 0            | 0 | -0.074122178 | 0 | 0            | 0 |
| 0 | -0.024108879 | 0 | 0            | 0 | 0            | 0 | -0.062906796 | 0 |
| 0 | -0.026788543 | 0 | -0.081489926 | 0 | 0.004036977  | 0 | 0            | 0 |
| 0 | -0.10752495  | 0 | -0.10467486  | 0 | 0            | 0 | -0.036707365 | 0 |
| 0 | 0            | 0 | -0.11447729  | 0 | 0.010208238  | 0 | -0.03669283  | 0 |

|   |              |   |              |   |              |   |              |   |
|---|--------------|---|--------------|---|--------------|---|--------------|---|
| 0 | 0.094882494  | 0 | -0.11438361  | 0 | 0.009603168  | 0 | -0.036788951 | 0 |
| 0 | -0.10846989  | 0 | 0            | 0 | -0.10087786  | 0 | -0.035633813 | 0 |
| 0 | -0.10150782  | 0 | -0.10813569  | 0 | 0.004373595  | 0 | 0            | 0 |
| 0 | -0.11404974  | 0 | -0.12041297  | 0 | 0.01385751   | 0 | -0.03117777  | 0 |
| 0 | -0.11877449  | 0 | -0.10905986  | 0 | -0.004300969 | 0 | -0.032190659 | 0 |
| 0 | -0.15902581  | 0 | -0.11955187  | 0 | 0.032657152  | 0 | -0.021076832 | 0 |
| 0 | -0.20731097  | 0 | -0.051726589 | 0 | 0            | 0 | -0.070859418 | 0 |
| 0 | -0.20615278  | 0 | -0.074845367 | 0 | 0.024078494  | 0 | -0.071236281 | 0 |
| 0 | 0            | 0 | -0.076442877 | 0 | 0.02648872   | 0 | -0.071335279 | 0 |
| 0 | -0.20531881  | 0 | -0.077152369 | 0 | 0.028158731  | 0 | -0.070878042 | 0 |
| 0 | 0.017633751  | 0 | -0.076093248 | 0 | 0.026085271  | 0 | -0.071803042 | 0 |
| 0 | -0.20899814  | 0 | -0.078741913 | 0 | 0.021574687  | 0 | -0.070771634 | 0 |
| 0 | -0.20595346  | 0 | 0            | 0 | -0.047905579 | 0 | -0.070570778 | 0 |
| 0 | -0.21597427  | 0 | -0.091433698 | 0 | 0.020364555  | 0 | -0.056824688 | 0 |
| 0 | -0.20262378  | 0 | -0.071720936 | 0 | 0.020639286  | 0 | -0.067309333 | 0 |
| 0 | -0.13740202  | 0 | -0.11451404  | 0 | -0.007081264 | 0 | -0.016741645 | 0 |
| 0 | -0.21934381  | 0 | -0.068468965 | 0 | 0.014598134  | 0 | 0            | 0 |
| 0 | 0            | 0 | -0.091869749 | 0 | 0.018803484  | 0 | -0.059798622 | 0 |
| 0 | 0.015472874  | 0 | -0.091804184 | 0 | 0.018725394  | 0 | -0.059888718 | 0 |
| 0 | -0.028710214 | 0 | -0.074063475 | 0 | 0            | 0 | -0.059590696 | 0 |
| 0 | -0.027679204 | 0 | -0.09024731  | 0 | 0.016794107  | 0 | -0.059876983 | 0 |
| 0 | -0.028715014 | 0 | -0.092199934 | 0 | 0.01992636   | 0 | -0.059579071 | 0 |
| 0 | -0.030284618 | 0 | -0.093760792 | 0 | 0.014296764  | 0 | -0.059442583 | 0 |
| 0 | -0.028307299 | 0 | 0            | 0 | -0.070007325 | 0 | -0.059186771 | 0 |
| 0 | -0.024231204 | 0 | -0.08688064  | 0 | 0.01308439   | 0 | -0.055965822 | 0 |
| 0 | -0.031046457 | 0 | -0.085737842 | 0 | 0.00870939   | 0 | 0            | 0 |
| 0 | -0.10752029  | 0 | -0.11431203  | 0 | 0.010150596  | 0 | -0.036818189 | 0 |
| 0 | -0.20713365  | 0 | -0.076729957 | 0 | 0.02636457   | 0 | -0.071131177 | 0 |
| 0 | -0.028845436 | 0 | -0.091892174 | 0 | 0.018813304  | 0 | -0.059790523 | 0 |

SUPPLEMENTARY TABLE 9

| Model    | BIC     | Loglike  | H2r       | SE | bsnp_rs2938864 | SE | bsnp_rs1001646 |
|----------|---------|----------|-----------|----|----------------|----|----------------|
| cov1     | -1.6208 | -385.574 | 0.4015096 | 0  | -0.11919205    | 0  | 0              |
| cov0     | 0       | -389.899 | 0.4068612 | 0  | 0              | 0  | 0              |
| cov5     | 0.2511  | -386.51  | 0.4039033 | 0  | 0              | 0  | 0              |
| cov10    | 0.3329  | -386.551 | 0.3963353 | 0  | 0              | 0  | 0              |
| cov9     | 0.4056  | -386.587 | 0.3958894 | 0  | 0              | 0  | 0              |
| cov6     | 0.8937  | -386.831 | 0.4021174 | 0  | 0              | 0  | 0              |
| cov2     | 1.145   | -386.957 | 0.4031167 | 0  | 0              | 0  | -0.097292713   |
| cov4     | 1.5839  | -387.177 | 0.4014307 | 0  | 0              | 0  | 0              |
| cov5_10  | 2.2253  | -383.983 | 0.3948512 | 0  | 0              | 0  | 0              |
| cov5_9   | 2.5478  | -384.144 | 0.3947367 | 0  | 0              | 0  | 0              |
| cov11    | 2.8567  | -387.813 | 0.4022041 | 0  | 0              | 0  | 0              |
| cov1_10  | 3.1683  | -384.454 | 0.3965485 | 0  | -0.091167065   | 0  | 0              |
| cov1_9   | 3.3681  | -384.554 | 0.3964525 | 0  | -0.090784428   | 0  | 0              |
| cov4_10  | 3.4671  | -384.604 | 0.3929286 | 0  | 0              | 0  | 0              |
| cov4_9   | 3.6843  | -384.712 | 0.3927225 | 0  | 0              | 0  | 0              |
| cov2_10  | 4.9079  | -385.324 | 0.3969063 | 0  | 0              | 0  | -0.067661243   |
| cov1_3   | 5.0421  | -385.391 | 0.4044507 | 0  | -0.12246955    | 0  | 0              |
| cov2_9   | 5.045   | -385.392 | 0.3966286 | 0  | 0              | 0  | -0.067150243   |
| cov6_10  | 5.0903  | -385.415 | 0.3962955 | 0  | 0              | 0  | 0              |
| cov1_6   | 5.1602  | -385.45  | 0.4018441 | 0  | -0.16399389    | 0  | 0              |
| cov6_9   | 5.2639  | -385.502 | 0.3961054 | 0  | 0              | 0  | 0              |
| cov1_11  | 5.3085  | -385.524 | 0.4020217 | 0  | -0.13434857    | 0  | 0              |
| cov1_4   | 5.3417  | -385.541 | 0.4010858 | 0  | -0.10788753    | 0  | 0              |
| cov1_7   | 5.3505  | -385.545 | 0.402023  | 0  | -0.11844767    | 0  | 0              |
| cov1_8   | 5.3867  | -385.563 | 0.4018297 | 0  | -0.11873948    | 0  | 0              |
| cov1_2   | 5.3916  | -385.566 | 0.4015215 | 0  | -0.12756737    | 0  | 0.009760694    |
| cov1_5   | 5.3977  | -385.569 | 0.4015781 | 0  | -0.1119203     | 0  | 0              |
| cov10_11 | 5.5563  | -385.648 | 0.3951575 | 0  | 0              | 0  | 0              |
| cov9_11  | 5.7432  | -385.742 | 0.3949386 | 0  | 0              | 0  | 0              |
| cov3_10  | 6.6332  | -386.187 | 0.3991766 | 0  | 0              | 0  | 0              |
| cov2_5   | 6.7505  | -386.245 | 0.4030148 | 0  | 0              | 0  | -0.043759958   |
| cov3_9   | 6.7539  | -386.247 | 0.398615  | 0  | 0              | 0  | 0              |
| cov5_6   | 6.806   | -386.273 | 0.402701  | 0  | 0              | 0  | 0              |
| cov7     | 6.8128  | -389.791 | 0.4075112 | 0  | 0              | 0  | 0              |
| cov8     | 6.8915  | -389.83  | 0.4073952 | 0  | 0              | 0  | 0              |
| cov3     | 6.9831  | -389.876 | 0.407901  | 0  | 0              | 0  | 0              |
| cov5_11  | 7.1056  | -386.423 | 0.402915  | 0  | 0              | 0  | 0              |
| cov4_6   | 7.1314  | -386.436 | 0.4009013 | 0  | 0              | 0  | 0              |
| cov5_7   | 7.1358  | -386.438 | 0.4046566 | 0  | 0              | 0  | 0              |
| cov5_8   | 7.1975  | -386.469 | 0.4044855 | 0  | 0              | 0  | 0              |
| cov4_5   | 7.2448  | -386.492 | 0.403402  | 0  | 0              | 0  | 0              |
| cov3_5   | 7.2789  | -386.509 | 0.4037094 | 0  | 0              | 0  | 0              |
| cov2_6   | 7.307   | -386.523 | 0.4020851 | 0  | 0              | 0  | -0.050446212   |
| cov9_10  | 7.3087  | -386.524 | 0.3960483 | 0  | 0              | 0  | 0              |
| cov7_10  | 7.3144  | -386.527 | 0.3966996 | 0  | 0              | 0  | 0              |

|            |         |          |           |   |              |   |              |
|------------|---------|----------|-----------|---|--------------|---|--------------|
| cov8_10    | 7.3478  | -386.544 | 0.3965401 | 0 | 0            | 0 | 0            |
| cov7_9     | 7.385   | -386.563 | 0.3962597 | 0 | 0            | 0 | 0            |
| cov8_9     | 7.4193  | -386.58  | 0.3961012 | 0 | 0            | 0 | 0            |
| cov3_6     | 7.6176  | -386.679 | 0.4047946 | 0 | 0            | 0 | 0            |
| cov2_4     | 7.7592  | -386.75  | 0.4018404 | 0 | 0            | 0 | -0.062321199 |
| cov6_11    | 7.7864  | -386.763 | 0.4016251 | 0 | 0            | 0 | 0            |
| cov4_11    | 7.7958  | -386.768 | 0.400157  | 0 | 0            | 0 | 0            |
| cov6_7     | 7.8147  | -386.777 | 0.4027691 | 0 | 0            | 0 | 0            |
| cov2_11    | 7.8675  | -386.804 | 0.4020784 | 0 | 0            | 0 | -0.077045143 |
| cov6_8     | 7.8719  | -386.806 | 0.4025758 | 0 | 0            | 0 | 0            |
| cov2_3     | 7.8862  | -386.813 | 0.4057395 | 0 | 0            | 0 | -0.10016111  |
| cov2_7     | 8.0657  | -386.903 | 0.4037447 | 0 | 0            | 0 | -0.096551493 |
| cov2_8     | 8.1189  | -386.929 | 0.4035751 | 0 | 0            | 0 | -0.09676472  |
| cov3_4     | 8.5869  | -387.163 | 0.4005188 | 0 | 0            | 0 | 0            |
| cov4_7     | 8.5873  | -387.164 | 0.401747  | 0 | 0            | 0 | 0            |
| cov4_8     | 8.6084  | -387.174 | 0.4015672 | 0 | 0            | 0 | 0            |
| cov5_6_10  | 8.9034  | -383.807 | 0.3943414 | 0 | 0            | 0 | 0            |
| cov3_5_10  | 8.9466  | -383.829 | 0.3970735 | 0 | 0            | 0 | 0            |
| cov2_5_10  | 9.2049  | -383.958 | 0.3945851 | 0 | 0            | 0 | 0.014634201  |
| cov5_10_11 | 9.2149  | -383.963 | 0.3950347 | 0 | 0            | 0 | 0            |
| cov5_7_10  | 9.2247  | -383.968 | 0.3952301 | 0 | 0            | 0 | 0            |
| cov5_8_10  | 9.2487  | -383.98  | 0.3950204 | 0 | 0            | 0 | 0            |
| cov5_9_10  | 9.2498  | -383.98  | 0.3949278 | 0 | 0            | 0 | 0            |
| cov4_5_10  | 9.2504  | -383.981 | 0.3947076 | 0 | 0            | 0 | 0            |
| cov1_5_10  | 9.254   | -383.982 | 0.3948811 | 0 | -0.001887247 | 0 | 0            |
| cov5_6_9   | 9.2731  | -383.992 | 0.394212  | 0 | 0            | 0 | 0            |
| cov3_5_9   | 9.304   | -384.007 | 0.3968105 | 0 | 0            | 0 | 0            |
| cov1_3_10  | 9.335   | -384.023 | 0.4000668 | 0 | -0.0926808   | 0 | 0            |
| cov7_11    | 9.3561  | -387.548 | 0.4032821 | 0 | 0            | 0 | 0            |
| cov3_11    | 9.3859  | -387.563 | 0.4053412 | 0 | 0            | 0 | 0            |
| cov8_11    | 9.4882  | -387.614 | 0.4031643 | 0 | 0            | 0 | 0            |
| cov5_9_11  | 9.5395  | -384.125 | 0.3948997 | 0 | 0            | 0 | 0            |
| cov5_7_9   | 9.5435  | -384.127 | 0.3951362 | 0 | 0            | 0 | 0            |
| cov2_5_9   | 9.5483  | -384.13  | 0.3945361 | 0 | 0            | 0 | 0.011085578  |
| cov4_5_9   | 9.5691  | -384.14  | 0.394533  | 0 | 0            | 0 | 0            |
| cov5_8_9   | 9.5695  | -384.14  | 0.3949287 | 0 | 0            | 0 | 0            |
| cov1_5_9   | 9.5716  | -384.141 | 0.394862  | 0 | -0.007440362 | 0 | 0            |
| cov1_3_9   | 9.5932  | -384.152 | 0.3998409 | 0 | -0.092221671 | 0 | 0            |
| cov1_6_10  | 9.6926  | -384.202 | 0.3968379 | 0 | -0.15372275  | 0 | 0            |
| cov1_4_10  | 9.7544  | -384.233 | 0.3947056 | 0 | -0.057744338 | 0 | 0            |
| cov1_6_9   | 9.8996  | -384.305 | 0.3967101 | 0 | -0.15276453  | 0 | 0            |
| cov1_4_9   | 9.9772  | -384.344 | 0.3946245 | 0 | -0.058025678 | 0 | 0            |
| cov1_10_11 | 10.135  | -384.423 | 0.3969686 | 0 | -0.10333967  | 0 | 0            |
| cov1_2_10  | 10.1575 | -384.434 | 0.3964891 | 0 | -0.10392003  | 0 | 0.01506716   |
| cov1_7_10  | 10.1791 | -384.445 | 0.396839  | 0 | -0.090925473 | 0 | 0            |
| cov1_9_10  | 10.1892 | -384.45  | 0.3966608 | 0 | -0.09180408  | 0 | 0            |
| cov1_8_10  | 10.1959 | -384.453 | 0.3966323 | 0 | -0.091100836 | 0 | 0            |

|            |         |          |           |   |              |              |
|------------|---------|----------|-----------|---|--------------|--------------|
| cov3_4_10  | 10.2821 | -384.496 | 0.394847  | 0 | 0            | 0            |
| cov1_9_11  | 10.3276 | -384.519 | 0.3968891 | 0 | -0.10361687  | 0            |
| cov1_2_9   | 10.3644 | -384.538 | 0.3964081 | 0 | -0.10237797  | 0.013663727  |
| cov1_7_9   | 10.3767 | -384.544 | 0.3967596 | 0 | -0.090532834 | 0            |
| cov4_10_11 | 10.3848 | -384.548 | 0.3928729 | 0 | 0            | 0            |
| cov1_8_9   | 10.395  | -384.553 | 0.3965544 | 0 | -0.090705415 | 0            |
| cov4_6_10  | 10.4547 | -384.583 | 0.3932696 | 0 | 0            | 0            |
| cov4_8_10  | 10.4832 | -384.597 | 0.3926816 | 0 | 0            | 0            |
| cov2_4_10  | 10.4898 | -384.6   | 0.3926916 | 0 | 0            | 0.005975255  |
| cov4_9_10  | 10.4941 | -384.602 | 0.3928791 | 0 | 0            | 0            |
| cov4_7_10  | 10.4959 | -384.603 | 0.3928929 | 0 | 0            | 0            |
| cov3_4_9   | 10.5236 | -384.617 | 0.3945136 | 0 | 0            | 0            |
| cov4_9_11  | 10.615  | -384.663 | 0.3927039 | 0 | 0            | 0            |
| cov4_6_9   | 10.674  | -384.692 | 0.3930825 | 0 | 0            | 0            |
| cov4_8_9   | 10.7029 | -384.707 | 0.3925019 | 0 | 0            | 0            |
| cov2_4_9   | 10.7104 | -384.711 | 0.3925581 | 0 | 0            | 0.004091722  |
| cov4_7_9   | 10.7134 | -384.712 | 0.3927107 | 0 | 0            | 0            |
| cov2_3_10  | 11.0774 | -384.894 | 0.4003472 | 0 | 0            | -0.069524545 |
| cov1_7_8   | 11.1634 | -384.937 | 0.4014576 | 0 | -0.11838709  | 0            |
| cov2_3_9   | 11.2669 | -384.989 | 0.3999444 | 0 | 0            | -0.068988979 |
| cov3_6_10  | 11.2929 | -385.002 | 0.3996353 | 0 | 0            | 0            |
| cov3_10_11 | 11.3627 | -385.037 | 0.3988633 | 0 | 0            | 0            |
| cov3_6_9   | 11.5213 | -385.116 | 0.3993202 | 0 | 0            | 0            |
| cov3_9_11  | 11.6347 | -385.173 | 0.3985204 | 0 | 0            | 0            |
| cov2_6_10  | 11.6709 | -385.191 | 0.3966629 | 0 | 0            | -0.043069304 |
| cov2_10_11 | 11.7337 | -385.222 | 0.3961747 | 0 | 0            | -0.051617759 |
| cov2_6_9   | 11.8303 | -385.271 | 0.3964616 | 0 | 0            | -0.043733337 |
| cov1_3_6   | 11.8444 | -385.278 | 0.4046716 | 0 | -0.16525321  | 0            |
| cov2_9_11  | 11.8972 | -385.304 | 0.3959879 | 0 | 0            | -0.052317773 |
| cov2_7_10  | 11.9032 | -385.307 | 0.3972667 | 0 | 0            | -0.067489016 |
| cov2_8_10  | 11.9296 | -385.32  | 0.3970788 | 0 | 0            | -0.067583545 |
| cov2_9_10  | 11.933  | -385.322 | 0.3968232 | 0 | 0            | -0.067365317 |
| cov1_3_8   | 11.9378 | -385.324 | 0.4050528 | 0 | -0.1258614   | 0            |
| cov6_10_11 | 11.943  | -385.327 | 0.3957691 | 0 | 0            | 0            |
| cov1_3_7   | 12.0132 | -385.362 | 0.4048664 | 0 | -0.12472663  | 0            |
| cov1_3_11  | 12.0329 | -385.372 | 0.4045833 | 0 | -0.13184961  | 0            |
| cov2_7_9   | 12.0381 | -385.374 | 0.3970001 | 0 | 0            | -0.066975662 |
| cov1_3_5   | 12.0419 | -385.376 | 0.4046861 | 0 | -0.13629822  | 0            |
| cov1_2_3   | 12.0598 | -385.385 | 0.4044385 | 0 | -0.12936859  | 0.008065372  |
| cov2_8_9   | 12.0656 | -385.388 | 0.3968129 | 0 | 0            | -0.067068266 |
| cov1_3_4   | 12.0703 | -385.391 | 0.4043404 | 0 | -0.12099392  | 0            |
| cov6_7_10  | 12.0816 | -385.396 | 0.396688  | 0 | 0            | 0            |
| cov6_8_10  | 12.1112 | -385.411 | 0.3964827 | 0 | 0            | 0            |
| cov1_4_6   | 12.114  | -385.412 | 0.4013698 | 0 | -0.1527636   | 0            |
| cov1_6_11  | 12.1162 | -385.414 | 0.4022824 | 0 | -0.17472658  | 0            |
| cov6_9_10  | 12.1194 | -385.415 | 0.3962935 | 0 | 0            | 0            |
| cov6_9_11  | 12.1321 | -385.422 | 0.39562   | 0 | 0            | 0            |



|            |         |          |           |   |             |   |              |
|------------|---------|----------|-----------|---|-------------|---|--------------|
| cov1_6_7   | 12.1396 | -385.425 | 0.402313  | 0 | -0.1625934  | 0 | 0            |
| cov1_6_8   | 12.1714 | -385.441 | 0.4021321 | 0 | -0.16326809 | 0 | 0            |
| cov1_2_6   | 12.1772 | -385.444 | 0.4018591 | 0 | -0.17072778 | 0 | 0.008299127  |
| cov1_5_6   | 12.1799 | -385.445 | 0.4019056 | 0 | -0.15703715 | 0 | 0            |
| cov6_7_9   | 12.2523 | -385.482 | 0.3965117 | 0 | 0           | 0 | 0            |
| cov1_4_11  | 12.274  | -385.492 | 0.4016056 | 0 | -0.12307036 | 0 | 0            |
| cov1_2_4   | 12.2804 | -385.496 | 0.4008413 | 0 | -0.12276618 | 0 | 0.026321623  |
| cov6_8_9   | 12.2834 | -385.497 | 0.3963076 | 0 | 0           | 0 | 0            |
| cov1_7_11  | 12.313  | -385.512 | 0.4022932 | 0 | -0.13159876 | 0 | 0            |
| cov1_4_7   | 12.3254 | -385.518 | 0.4015805 | 0 | -0.10826473 | 0 | 0            |
| cov1_2_11  | 12.3264 | -385.519 | 0.4020159 | 0 | -0.14085362 | 0 | 0.008024289  |
| cov1_5_11  | 12.3267 | -385.519 | 0.4020961 | 0 | -0.12698112 | 0 | 0            |
| cov1_8_11  | 12.334  | -385.522 | 0.4021275 | 0 | -0.13331208 | 0 | 0            |
| cov1_4_8   | 12.3566 | -385.534 | 0.4013671 | 0 | -0.10809368 | 0 | 0            |
| cov1_4_5   | 12.3628 | -385.537 | 0.4008754 | 0 | -0.11287783 | 0 | 0            |
| cov1_2_7   | 12.3639 | -385.537 | 0.4020306 | 0 | -0.12657711 | 0 | 0.009467684  |
| cov1_5_7   | 12.3653 | -385.538 | 0.4021234 | 0 | -0.10995611 | 0 | 0            |
| cov7_10_11 | 12.391  | -385.551 | 0.3959518 | 0 | 0           | 0 | 0            |
| cov1_2_8   | 12.3997 | -385.555 | 0.4018367 | 0 | -0.12697254 | 0 | 0.009587673  |
| cov1_5_8   | 12.403  | -385.557 | 0.4019237 | 0 | -0.11069118 | 0 | 0            |
| cov1_2_5   | 12.4091 | -385.56  | 0.4015946 | 0 | -0.12020872 | 0 | 0.010050031  |
| cov8_10_11 | 12.47   | -385.59  | 0.3957845 | 0 | 0           | 0 | 0            |
| cov7_9_11  | 12.5766 | -385.644 | 0.3957411 | 0 | 0           | 0 | 0            |
| cov9_10_11 | 12.5826 | -385.647 | 0.3951002 | 0 | 0           | 0 | 0            |
| cov7_8     | 12.6276 | -389.184 | 0.4069831 | 0 | 0           | 0 | 0            |
| cov8_9_11  | 12.6558 | -385.683 | 0.395576  | 0 | 0           | 0 | 0            |
| cov5_7_8   | 12.9879 | -385.849 | 0.4041183 | 0 | 0           | 0 | 0            |
| cov7_8_10  | 12.9879 | -385.849 | 0.3960176 | 0 | 0           | 0 | 0            |
| cov7_8_9   | 13.0593 | -385.885 | 0.3955703 | 0 | 0           | 0 | 0            |
| cov3_8_10  | 13.1764 | -385.944 | 0.3998959 | 0 | 0           | 0 | 0            |
| cov3_7_10  | 13.3465 | -386.029 | 0.3998015 | 0 | 0           | 0 | 0            |
| cov3_8_9   | 13.3533 | -386.032 | 0.3992701 | 0 | 0           | 0 | 0            |
| cov6_7_8   | 13.3691 | -386.04  | 0.4020557 | 0 | 0           | 0 | 0            |
| cov3_7_9   | 13.512  | -386.111 | 0.3991761 | 0 | 0           | 0 | 0            |
| cov3_9_10  | 13.6138 | -386.162 | 0.398887  | 0 | 0           | 0 | 0            |
| cov2_5_6   | 13.6268 | -386.169 | 0.4025268 | 0 | 0           | 0 | -0.031140744 |
| cov2_5_7   | 13.6603 | -386.186 | 0.4037274 | 0 | 0           | 0 | -0.04276525  |
| cov5_6_7   | 13.7144 | -386.213 | 0.4034302 | 0 | 0           | 0 | 0            |
| cov2_5_8   | 13.7159 | -386.213 | 0.4035462 | 0 | 0           | 0 | -0.043022033 |
| cov2_3_5   | 13.7412 | -386.226 | 0.404063  | 0 | 0           | 0 | -0.047534942 |
| cov2_4_5   | 13.7458 | -386.228 | 0.403461  | 0 | 0           | 0 | -0.049808221 |
| cov2_5_11  | 13.751  | -386.231 | 0.4026676 | 0 | 0           | 0 | -0.039871166 |
| cov5_6_8   | 13.7725 | -386.242 | 0.4032398 | 0 | 0           | 0 | 0            |
| cov3_5_6   | 13.7892 | -386.25  | 0.4038054 | 0 | 0           | 0 | 0            |
| cov4_5_6   | 13.7999 | -386.255 | 0.4022195 | 0 | 0           | 0 | 0            |
| cov5_6_11  | 13.8167 | -386.264 | 0.4024702 | 0 | 0           | 0 | 0            |
| cov3_7     | 13.8249 | -389.782 | 0.4068327 | 0 | 0           | 0 | 0            |

|             |         |          |           |   |              |   |              |
|-------------|---------|----------|-----------|---|--------------|---|--------------|
| cov2_7_8    | 13.8666 | -386.289 | 0.4031656 | 0 | 0            | 0 | -0.096608243 |
| cov5_7_11   | 13.9122 | -386.312 | 0.4036622 | 0 | 0            | 0 | 0            |
| cov3_8      | 13.9186 | -389.829 | 0.4071713 | 0 | 0            | 0 | 0            |
| cov2_3_6    | 13.993  | -386.352 | 0.4049377 | 0 | 0            | 0 | -0.052032495 |
| cov5_8_11   | 13.9931 | -386.352 | 0.4035282 | 0 | 0            | 0 | 0            |
| cov3_5_7    | 14.0133 | -386.362 | 0.4024957 | 0 | 0            | 0 | 0            |
| cov2_4_6    | 14.061  | -386.386 | 0.4011686 | 0 | 0            | 0 | -0.025291453 |
| cov4_5_11   | 14.0911 | -386.401 | 0.4023325 | 0 | 0            | 0 | 0            |
| cov3_4_6    | 14.0921 | -386.402 | 0.4024128 | 0 | 0            | 0 | 0            |
| cov4_6_11   | 14.0925 | -386.402 | 0.4005486 | 0 | 0            | 0 | 0            |
| cov4_6_7    | 14.1135 | -386.412 | 0.401368  | 0 | 0            | 0 | 0            |
| cov3_5_11   | 14.1144 | -386.413 | 0.4036177 | 0 | 0            | 0 | 0            |
| cov3_5_8    | 14.1344 | -386.423 | 0.402808  | 0 | 0            | 0 | 0            |
| cov4_6_8    | 14.1468 | -386.429 | 0.4011579 | 0 | 0            | 0 | 0            |
| cov4_5_7    | 14.1519 | -386.431 | 0.4042951 | 0 | 0            | 0 | 0            |
| cov4_5_8    | 14.2089 | -386.46  | 0.4040635 | 0 | 0            | 0 | 0            |
| cov2_6_7    | 14.2385 | -386.475 | 0.4027134 | 0 | 0            | 0 | -0.050025584 |
| cov3_4_5    | 14.2697 | -386.49  | 0.4030142 | 0 | 0            | 0 | 0            |
| cov7_9_10   | 14.2907 | -386.501 | 0.3964096 | 0 | 0            | 0 | 0            |
| cov2_6_8    | 14.2909 | -386.501 | 0.4025233 | 0 | 0            | 0 | -0.050221739 |
| cov2_6_11   | 14.3049 | -386.508 | 0.4018186 | 0 | 0            | 0 | -0.047475955 |
| cov8_9_10   | 14.3239 | -386.517 | 0.3962504 | 0 | 0            | 0 | 0            |
| cov3_6_11   | 14.4092 | -386.56  | 0.4045775 | 0 | 0            | 0 | 0            |
| cov4_7_8    | 14.4352 | -386.573 | 0.4012266 | 0 | 0            | 0 | 0            |
| cov2_3_11   | 14.4642 | -386.588 | 0.4050796 | 0 | 0            | 0 | -0.075820156 |
| cov2_4_11   | 14.4991 | -386.605 | 0.4008541 | 0 | 0            | 0 | -0.043399404 |
| cov3_6_8    | 14.6044 | -386.658 | 0.4051648 | 0 | 0            | 0 | 0            |
| cov6_7_11   | 14.6308 | -386.671 | 0.4023705 | 0 | 0            | 0 | 0            |
| cov3_6_7    | 14.6422 | -386.677 | 0.4049203 | 0 | 0            | 0 | 0            |
| cov4_7_11   | 14.674  | -386.692 | 0.400877  | 0 | 0            | 0 | 0            |
| cov2_7_11   | 14.6819 | -386.696 | 0.4028171 | 0 | 0            | 0 | -0.072125516 |
| cov6_8_11   | 14.7102 | -386.711 | 0.4022029 | 0 | 0            | 0 | 0            |
| cov2_3_4    | 14.7122 | -386.712 | 0.4036373 | 0 | 0            | 0 | -0.07152506  |
| cov2_4_7    | 14.7315 | -386.721 | 0.4023596 | 0 | 0            | 0 | -0.063670678 |
| cov4_8_11   | 14.7402 | -386.726 | 0.4007096 | 0 | 0            | 0 | 0            |
| cov2_8_11   | 14.7629 | -386.737 | 0.4026775 | 0 | 0            | 0 | -0.07318545  |
| cov2_4_8    | 14.7676 | -386.739 | 0.4021599 | 0 | 0            | 0 | -0.063123317 |
| cov3_4_11   | 14.7823 | -386.747 | 0.4012871 | 0 | 0            | 0 | 0            |
| cov2_3_8    | 14.8839 | -386.797 | 0.4060828 | 0 | 0            | 0 | -0.10158252  |
| cov2_3_7    | 14.9127 | -386.812 | 0.405843  | 0 | 0            | 0 | -0.10057517  |
| cov5_7_8_10 | 14.95   | -383.316 | 0.39454   | 0 | 0            | 0 | 0            |
| cov7_8_11   | 15.1336 | -386.922 | 0.4027099 | 0 | 0            | 0 | 0            |
| cov5_7_8_9  | 15.2716 | -383.477 | 0.3944389 | 0 | 0            | 0 | 0            |
| cov3_4_7    | 15.4888 | -387.1   | 0.3997011 | 0 | 0            | 0 | 0            |
| cov3_4_8    | 15.5624 | -387.137 | 0.4000044 | 0 | 0            | 0 | 0            |
| cov1_3_8_10 | 15.5634 | -383.623 | 0.4008215 | 0 | -0.096386766 | 0 | 0            |
| cov1_5_6_10 | 15.6817 | -383.682 | 0.3950808 | 0 | -0.06562078  | 0 | 0            |

|              |         |          |           |   |              |   |             |
|--------------|---------|----------|-----------|---|--------------|---|-------------|
| cov3_5_6_10  | 15.7581 | -383.72  | 0.3961613 | 0 | 0            | 0 | 0           |
| cov3_5_8_10  | 15.7626 | -383.722 | 0.3975213 | 0 | 0            | 0 | 0           |
| cov1_3_7_10  | 15.7812 | -383.732 | 0.4007737 | 0 | -0.09591853  | 0 | 0           |
| cov3_5_7_10  | 15.8693 | -383.776 | 0.3974157 | 0 | 0            | 0 | 0           |
| cov1_3_6_10  | 15.8707 | -383.776 | 0.4002872 | 0 | -0.1545274   | 0 | 0           |
| cov1_7_8_10  | 15.9029 | -383.792 | 0.396149  | 0 | -0.090319052 | 0 | 0           |
| cov5_6_7_10  | 15.9032 | -383.793 | 0.3947107 | 0 | 0            | 0 | 0           |
| cov1_3_8_9   | 15.912  | -383.797 | 0.4005317 | 0 | -0.095624254 | 0 | 0           |
| cov1_3_5_10  | 15.9199 | -383.801 | 0.3978464 | 0 | -0.025898226 | 0 | 0           |
| cov5_6_8_10  | 15.9264 | -383.804 | 0.3945138 | 0 | 0            | 0 | 0           |
| cov4_5_6_10  | 15.9307 | -383.806 | 0.3942413 | 0 | 0            | 0 | 0           |
| cov2_5_6_10  | 15.9317 | -383.807 | 0.3943129 | 0 | 0            | 0 | 0.002036778 |
| cov5_6_9_10  | 15.9321 | -383.807 | 0.3943651 | 0 | 0            | 0 | 0           |
| cov5_6_10_11 | 15.9324 | -383.807 | 0.3943288 | 0 | 0            | 0 | 0           |
| cov2_3_5_10  | 15.9659 | -383.824 | 0.3968561 | 0 | 0            | 0 | 0.006685642 |
| cov3_5_9_10  | 15.9716 | -383.827 | 0.3971483 | 0 | 0            | 0 | 0           |
| cov3_4_5_10  | 15.9746 | -383.828 | 0.3971742 | 0 | 0            | 0 | 0           |
| cov3_5_10_11 | 15.9757 | -383.829 | 0.397072  | 0 | 0            | 0 | 0           |
| cov1_5_6_9   | 16.0142 | -383.848 | 0.3950288 | 0 | -0.070287027 | 0 | 0           |
| cov1_7_8_9   | 16.1036 | -383.893 | 0.3960616 | 0 | -0.089886012 | 0 | 0           |
| cov1_3_7_9   | 16.1156 | -383.899 | 0.400483  | 0 | -0.095168268 | 0 | 0           |
| cov1_3_6_9   | 16.1369 | -383.909 | 0.4000278 | 0 | -0.15344428  | 0 | 0           |
| cov3_5_6_9   | 16.1472 | -383.915 | 0.3959245 | 0 | 0            | 0 | 0           |
| cov3_5_8_9   | 16.1648 | -383.923 | 0.3971957 | 0 | 0            | 0 | 0           |
| cov2_4_5_10  | 16.1931 | -383.937 | 0.3939139 | 0 | 0            | 0 | 0.022371583 |
| cov2_5_7_10  | 16.2036 | -383.943 | 0.3949658 | 0 | 0            | 0 | 0.014752804 |
| cov1_4_6_10  | 16.2064 | -383.944 | 0.3947523 | 0 | -0.12204623  | 0 | 0           |
| cov1_2_5_10  | 16.2123 | -383.947 | 0.3947645 | 0 | -0.017257041 | 0 | 0.020117562 |
| cov2_5_10_11 | 16.2138 | -383.948 | 0.3947685 | 0 | 0            | 0 | 0.011910612 |
| cov4_7_8_10  | 16.2145 | -383.948 | 0.3922287 | 0 | 0            | 0 | 0           |
| cov5_7_10_11 | 16.2272 | -383.955 | 0.3952978 | 0 | 0            | 0 | 0           |
| cov2_5_8_10  | 16.228  | -383.955 | 0.394758  | 0 | 0            | 0 | 0.014687182 |
| cov2_5_9_10  | 16.2298 | -383.956 | 0.394659  | 0 | 0            | 0 | 0.014582089 |
| cov1_5_10_11 | 16.2299 | -383.956 | 0.3953042 | 0 | -0.013544792 | 0 | 0           |
| cov1_3_4_10  | 16.2302 | -383.956 | 0.3984858 | 0 | -0.072855473 | 0 | 0           |
| cov5_9_10_11 | 16.241  | -383.961 | 0.3950945 | 0 | 0            | 0 | 0           |
| cov4_5_10_11 | 16.2415 | -383.962 | 0.3949178 | 0 | 0            | 0 | 0           |
| cov5_8_10_11 | 16.2431 | -383.962 | 0.3950974 | 0 | 0            | 0 | 0           |
| cov5_7_9_10  | 16.2492 | -383.966 | 0.3953086 | 0 | 0            | 0 | 0           |
| cov1_3_5_9   | 16.2521 | -383.967 | 0.397775  | 0 | -0.031251124 | 0 | 0           |
| cov4_5_7_10  | 16.2529 | -383.967 | 0.3951475 | 0 | 0            | 0 | 0           |
| cov1_5_7_10  | 16.2537 | -383.968 | 0.3952448 | 0 | -0.000986176 | 0 | 0           |
| cov3_5_7_9   | 16.2574 | -383.97  | 0.3970906 | 0 | 0            | 0 | 0           |
| cov5_6_7_9   | 16.2689 | -383.975 | 0.3946019 | 0 | 0            | 0 | 0           |
| cov5_8_9_10  | 16.2732 | -383.978 | 0.3950982 | 0 | 0            | 0 | 0           |
| cov4_5_9_10  | 16.2753 | -383.979 | 0.3947871 | 0 | 0            | 0 | 0           |
| cov4_5_8_10  | 16.2754 | -383.979 | 0.3948835 | 0 | 0            | 0 | 0           |

|              |         |          |           |   |              |   |              |
|--------------|---------|----------|-----------|---|--------------|---|--------------|
| cov1_5_8_10  | 16.2776 | -383.98  | 0.3950427 | 0 | -0.001500116 | 0 | 0            |
| cov1_5_9_10  | 16.2783 | -383.98  | 0.3949701 | 0 | -0.002512385 | 0 | 0            |
| cov1_4_5_10  | 16.2788 | -383.98  | 0.3947423 | 0 | -0.002563195 | 0 | 0            |
| cov5_6_8_9   | 16.2942 | -383.988 | 0.3944067 | 0 | 0            | 0 | 0            |
| cov3_7_11    | 16.2952 | -387.503 | 0.4046544 | 0 | 0            | 0 | 0            |
| cov4_5_6_9   | 16.2969 | -383.989 | 0.3940404 | 0 | 0            | 0 | 0            |
| cov2_5_6_9   | 16.3019 | -383.992 | 0.3942259 | 0 | 0            | 0 | -0.001048467 |
| cov5_6_9_11  | 16.3022 | -383.992 | 0.3942151 | 0 | 0            | 0 | 0            |
| cov2_3_5_9   | 16.3306 | -384.006 | 0.3967015 | 0 | 0            | 0 | 0.003362583  |
| cov3_5_9_11  | 16.333  | -384.007 | 0.3968059 | 0 | 0            | 0 | 0            |
| cov3_4_5_9   | 16.3331 | -384.007 | 0.396813  | 0 | 0            | 0 | 0            |
| cov1_2_3_10  | 16.3342 | -384.008 | 0.3999834 | 0 | -0.10373508  | 0 | 0.013069512  |
| cov1_2_4_10  | 16.3496 | -384.016 | 0.3933329 | 0 | -0.086591335 | 0 | 0.058861442  |
| cov1_3_9_10  | 16.3525 | -384.017 | 0.4002153 | 0 | -0.093444318 | 0 | 0            |
| cov1_3_10_11 | 16.3619 | -384.022 | 0.4001118 | 0 | -0.095011677 | 0 | 0            |
| cov3_8_11    | 16.3673 | -387.539 | 0.404923  | 0 | 0            | 0 | 0            |
| cov4_7_8_9   | 16.4339 | -384.058 | 0.3920398 | 0 | 0            | 0 | 0            |
| cov1_4_6_9   | 16.4379 | -384.06  | 0.394637  | 0 | -0.12166026  | 0 | 0            |
| cov1_3_4_9   | 16.4945 | -384.088 | 0.3982726 | 0 | -0.072717891 | 0 | 0            |
| cov2_4_5_9   | 16.537  | -384.109 | 0.3938589 | 0 | 0            | 0 | 0.018795285  |
| cov1_5_9_11  | 16.5378 | -384.11  | 0.3953087 | 0 | -0.019959781 | 0 | 0            |
| cov2_5_7_9   | 16.5432 | -384.113 | 0.3949361 | 0 | 0            | 0 | 0.011229868  |
| cov1_2_5_9   | 16.5446 | -384.113 | 0.3947762 | 0 | -0.021299033 | 0 | 0.017889072  |
| cov5_7_9_11  | 16.5486 | -384.115 | 0.3951879 | 0 | 0            | 0 | 0            |
| cov2_5_9_11  | 16.5542 | -384.118 | 0.39472   | 0 | 0            | 0 | 0.008193065  |
| cov4_5_9_11  | 16.5629 | -384.122 | 0.3947203 | 0 | 0            | 0 | 0            |
| cov5_8_9_11  | 16.5668 | -384.124 | 0.394988  | 0 | 0            | 0 | 0            |
| cov1_5_7_9   | 16.5685 | -384.125 | 0.3952388 | 0 | -0.00647428  | 0 | 0            |
| cov2_5_8_9   | 16.5696 | -384.126 | 0.3947307 | 0 | 0            | 0 | 0.011154529  |
| cov4_5_7_9   | 16.5698 | -384.126 | 0.3949866 | 0 | 0            | 0 | 0            |
| cov1_4_5_9   | 16.5916 | -384.137 | 0.3946547 | 0 | -0.008356768 | 0 | 0            |
| cov4_5_8_9   | 16.5933 | -384.138 | 0.3947241 | 0 | 0            | 0 | 0            |
| cov1_5_8_9   | 16.5939 | -384.138 | 0.395039  | 0 | -0.007001604 | 0 | 0            |
| cov1_2_3_9   | 16.5988 | -384.14  | 0.3997751 | 0 | -0.10202853  | 0 | 0.011566827  |
| cov1_3_9_11  | 16.6172 | -384.15  | 0.3999076 | 0 | -0.095735415 | 0 | 0            |
| cov1_2_4_9   | 16.6194 | -384.151 | 0.393358  | 0 | -0.085286434 | 0 | 0.055435332  |
| cov1_6_10_11 | 16.6897 | -384.186 | 0.397146  | 0 | -0.16087927  | 0 | 0            |
| cov1_2_6_10  | 16.6907 | -384.186 | 0.3967991 | 0 | -0.16445722  | 0 | 0.013293125  |
| cov1_6_7_10  | 16.7111 | -384.196 | 0.3970532 | 0 | -0.15312787  | 0 | 0            |
| cov1_6_9_10  | 16.7168 | -384.199 | 0.3969221 | 0 | -0.15403846  | 0 | 0            |
| cov1_6_8_10  | 16.7215 | -384.202 | 0.3968641 | 0 | -0.1536627   | 0 | 0            |
| cov1_4_10_11 | 16.731  | -384.206 | 0.3951211 | 0 | -0.069267804 | 0 | 0            |
| cov1_4_9_10  | 16.779  | -384.23  | 0.3947956 | 0 | -0.058334405 | 0 | 0            |
| cov1_4_8_10  | 16.7809 | -384.231 | 0.3945768 | 0 | -0.05749145  | 0 | 0            |
| cov1_4_7_10  | 16.7813 | -384.232 | 0.3948218 | 0 | -0.057982923 | 0 | 0            |
| cov1_6_9_11  | 16.8911 | -384.286 | 0.39704   | 0 | -0.16053559  | 0 | 0            |
| cov1_2_6_9   | 16.9042 | -384.293 | 0.3966838 | 0 | -0.16232406  | 0 | 0.011829888  |

|              |         |          |           |   |              |   |              |
|--------------|---------|----------|-----------|---|--------------|---|--------------|
| cov1_6_7_9   | 16.9164 | -384.299 | 0.396943  | 0 | -0.15212587  | 0 | 0            |
| cov3_4_8_10  | 16.92   | -384.301 | 0.3955808 | 0 | 0            | 0 | 0            |
| cov1_6_8_9   | 16.9283 | -384.305 | 0.3967544 | 0 | -0.15266308  | 0 | 0            |
| cov1_4_9_11  | 16.9462 | -384.314 | 0.3950598 | 0 | -0.070304687 | 0 | 0            |
| cov1_4_7_9   | 17.0029 | -384.342 | 0.3947663 | 0 | -0.058313005 | 0 | 0            |
| cov1_4_8_9   | 17.0047 | -384.343 | 0.3945234 | 0 | -0.057826467 | 0 | 0            |
| cov3_4_10_11 | 17.0354 | -384.359 | 0.3955549 | 0 | 0            | 0 | 0            |
| cov3_4_7_10  | 17.0694 | -384.376 | 0.3954627 | 0 | 0            | 0 | 0            |
| cov1_2_10_11 | 17.1314 | -384.407 | 0.3968878 | 0 | -0.11425518  | 0 | 0.013699903  |
| cov1_9_10_11 | 17.1571 | -384.419 | 0.3970702 | 0 | -0.10382324  | 0 | 0            |
| cov1_7_10_11 | 17.1597 | -384.421 | 0.3970846 | 0 | -0.10225017  | 0 | 0            |
| cov1_8_10_11 | 17.163  | -384.422 | 0.3969083 | 0 | -0.1038828   | 0 | 0            |
| cov1_2_7_10  | 17.1695 | -384.426 | 0.3967718 | 0 | -0.10352011  | 0 | 0.014871798  |
| cov1_2_9_10  | 17.1771 | -384.429 | 0.3966091 | 0 | -0.10484462  | 0 | 0.015343603  |
| cov1_2_8_10  | 17.1855 | -384.434 | 0.3965645 | 0 | -0.10381816  | 0 | 0.01501709   |
| cov1_7_9_10  | 17.2001 | -384.441 | 0.3969519 | 0 | -0.091561812 | 0 | 0            |
| cov3_4_6_10  | 17.203  | -384.442 | 0.3957815 | 0 | 0            | 0 | 0            |
| cov1_8_9_10  | 17.2169 | -384.449 | 0.3967447 | 0 | -0.091737809 | 0 | 0            |
| cov3_4_8_9   | 17.2179 | -384.45  | 0.395175  | 0 | 0            | 0 | 0            |
| cov2_3_4_10  | 17.3009 | -384.491 | 0.3953482 | 0 | 0            | 0 | -0.008182995 |
| cov3_4_9_10  | 17.3088 | -384.495 | 0.3947943 | 0 | 0            | 0 | 0            |
| cov3_4_9_11  | 17.3098 | -384.496 | 0.3952257 | 0 | 0            | 0 | 0            |
| cov1_2_9_11  | 17.3306 | -384.506 | 0.3968258 | 0 | -0.11338722  | 0 | 0.012220979  |
| cov1_7_9_11  | 17.3516 | -384.517 | 0.3970127 | 0 | -0.10246073  | 0 | 0            |
| cov3_4_7_9   | 17.3545 | -384.518 | 0.395057  | 0 | 0            | 0 | 0            |
| cov1_8_9_11  | 17.3558 | -384.519 | 0.3968366 | 0 | -0.10408804  | 0 | 0            |
| cov2_4_10_11 | 17.3591 | -384.52  | 0.3921076 | 0 | 0            | 0 | 0.019126963  |
| cov1_2_7_9   | 17.374  | -384.528 | 0.3967086 | 0 | -0.10196344  | 0 | 0.013464478  |
| cov1_2_8_9   | 17.3917 | -384.537 | 0.3965028 | 0 | -0.10225361  | 0 | 0.013603559  |
| cov4_7_10_11 | 17.4081 | -384.545 | 0.393041  | 0 | 0            | 0 | 0            |
| cov4_6_10_11 | 17.4127 | -384.547 | 0.3929441 | 0 | 0            | 0 | 0            |
| cov4_8_10_11 | 17.4132 | -384.548 | 0.392815  | 0 | 0            | 0 | 0            |
| cov4_9_10_11 | 17.4137 | -384.548 | 0.3928591 | 0 | 0            | 0 | 0            |
| cov2_3_8_10  | 17.4276 | -384.555 | 0.4011946 | 0 | 0            | 0 | -0.072275772 |
| cov2_4_6_10  | 17.4498 | -384.566 | 0.3928149 | 0 | 0            | 0 | 0.015237048  |
| cov3_4_6_9   | 17.4522 | -384.567 | 0.3954579 | 0 | 0            | 0 | 0            |
| cov4_6_8_10  | 17.4744 | -384.578 | 0.3930449 | 0 | 0            | 0 | 0            |
| cov4_6_9_10  | 17.4833 | -384.583 | 0.3932422 | 0 | 0            | 0 | 0            |
| cov4_6_7_10  | 17.4838 | -384.583 | 0.3932739 | 0 | 0            | 0 | 0            |
| cov2_4_8_10  | 17.5031 | -384.592 | 0.3923706 | 0 | 0            | 0 | 0.007210342  |
| cov4_8_9_10  | 17.5102 | -384.596 | 0.3926336 | 0 | 0            | 0 | 0            |
| cov2_4_9_10  | 17.5164 | -384.599 | 0.3926291 | 0 | 0            | 0 | 0.006173908  |
| cov2_4_7_10  | 17.5181 | -384.6   | 0.3926222 | 0 | 0            | 0 | 0.006248101  |
| cov4_7_9_10  | 17.5229 | -384.602 | 0.3928441 | 0 | 0            | 0 | 0            |
| cov2_3_4_9   | 17.5386 | -384.61  | 0.395106  | 0 | 0            | 0 | -0.009592655 |
| cov2_7_8_10  | 17.6019 | -384.642 | 0.3965654 | 0 | 0            | 0 | -0.067095937 |
| cov2_4_9_11  | 17.6059 | -384.644 | 0.3920681 | 0 | 0            | 0 | 0.015910246  |

|              |         |          |           |   |             |   |              |
|--------------|---------|----------|-----------|---|-------------|---|--------------|
| cov6_7_8_10  | 17.6142 | -384.648 | 0.3959563 | 0 | 0           | 0 | 0            |
| cov2_3_7_10  | 17.6292 | -384.656 | 0.4011152 | 0 | 0           | 0 | -0.071879312 |
| cov4_7_9_11  | 17.6373 | -384.66  | 0.3928873 | 0 | 0           | 0 | 0            |
| cov4_6_9_11  | 17.6422 | -384.662 | 0.3927957 | 0 | 0           | 0 | 0            |
| cov4_8_9_11  | 17.6437 | -384.663 | 0.3926608 | 0 | 0           | 0 | 0            |
| cov2_4_6_9   | 17.6797 | -384.681 | 0.3927081 | 0 | 0           | 0 | 0.012619685  |
| cov3_6_8_10  | 17.6871 | -384.684 | 0.4003504 | 0 | 0           | 0 | 0            |
| cov2_3_8_9   | 17.6889 | -384.685 | 0.4007178 | 0 | 0           | 0 | -0.071577112 |
| cov4_6_8_9   | 17.6957 | -384.689 | 0.3928803 | 0 | 0           | 0 | 0            |
| cov2_3_10_11 | 17.7006 | -384.691 | 0.3997071 | 0 | 0           | 0 | -0.046678084 |
| cov4_6_7_9   | 17.7029 | -384.692 | 0.393112  | 0 | 0           | 0 | 0            |
| cov2_4_8_9   | 17.7273 | -384.705 | 0.3922774 | 0 | 0           | 0 | 0.005165532  |
| cov2_7_8_9   | 17.7384 | -384.71  | 0.3962915 | 0 | 0           | 0 | -0.066562627 |
| cov2_4_7_9   | 17.7394 | -384.711 | 0.3925261 | 0 | 0           | 0 | 0.004216655  |
| cov6_7_8_9   | 17.7893 | -384.736 | 0.3957821 | 0 | 0           | 0 | 0            |
| cov2_3_6_10  | 17.8374 | -384.76  | 0.4001466 | 0 | 0           | 0 | -0.04479262  |
| cov1_3_7_8   | 17.8464 | -384.764 | 0.4042263 | 0 | -0.12448789 | 0 | 0            |
| cov2_3_7_9   | 17.8782 | -384.78  | 0.4006407 | 0 | 0           | 0 | -0.071182213 |
| cov3_6_7_10  | 17.8932 | -384.788 | 0.4002747 | 0 | 0           | 0 | 0            |
| cov3_6_10_11 | 17.9355 | -384.809 | 0.3992636 | 0 | 0           | 0 | 0            |
| cov2_3_9_11  | 17.9393 | -384.811 | 0.3994019 | 0 | 0           | 0 | -0.047773741 |
| cov3_6_8_9   | 17.9902 | -384.836 | 0.3999725 | 0 | 0           | 0 | 0            |
| cov3_8_10_11 | 18.0096 | -384.846 | 0.3993594 | 0 | 0           | 0 | 0            |
| cov2_3_6_9   | 18.0504 | -384.866 | 0.399822  | 0 | 0           | 0 | -0.0454888   |
| cov1_6_7_8   | 18.0546 | -384.868 | 0.4016954 | 0 | -0.15203068 | 0 | 0            |
| cov7_8_10_11 | 18.0631 | -384.872 | 0.3952595 | 0 | 0           | 0 | 0            |
| cov2_3_9_10  | 18.1043 | -384.893 | 0.40028   | 0 | 0           | 0 | -0.069303989 |
| cov1_7_8_11  | 18.1328 | -384.907 | 0.4017136 | 0 | -0.13083665 | 0 | 0            |
| cov1_4_7_8   | 18.1433 | -384.913 | 0.4010367 | 0 | -0.10869119 | 0 | 0            |
| cov3_7_10_11 | 18.1592 | -384.92  | 0.3992874 | 0 | 0           | 0 | 0            |
| cov1_2_7_8   | 18.178  | -384.93  | 0.4014661 | 0 | -0.12618923 | 0 | 0.009085604  |
| cov1_5_7_8   | 18.1816 | -384.932 | 0.4015452 | 0 | -0.11098041 | 0 | 0            |
| cov3_6_7_9   | 18.182  | -384.932 | 0.3998965 | 0 | 0           | 0 | 0            |
| cov3_6_9_11  | 18.199  | -384.94  | 0.3989878 | 0 | 0           | 0 | 0            |
| cov7_8_9_11  | 18.2512 | -384.967 | 0.3950435 | 0 | 0           | 0 | 0            |
| cov3_6_9_10  | 18.3217 | -385.002 | 0.399657  | 0 | 0           | 0 | 0            |
| cov3_8_9_11  | 18.3385 | -385.01  | 0.3989606 | 0 | 0           | 0 | 0            |
| cov3_9_10_11 | 18.3916 | -385.037 | 0.3988483 | 0 | 0           | 0 | 0            |
| cov3_7_9_11  | 18.4748 | -385.078 | 0.3988891 | 0 | 0           | 0 | 0            |
| cov2_6_10_11 | 18.6338 | -385.158 | 0.3962631 | 0 | 0           | 0 | -0.03868668  |
| cov2_6_7_10  | 18.6661 | -385.174 | 0.3970363 | 0 | 0           | 0 | -0.04288751  |
| cov2_7_10_11 | 18.6764 | -385.179 | 0.3966713 | 0 | 0           | 0 | -0.048894569 |
| cov2_6_8_10  | 18.693  | -385.187 | 0.396835  | 0 | 0           | 0 | -0.04301298  |
| cov2_6_9_10  | 18.6999 | -385.191 | 0.3966528 | 0 | 0           | 0 | -0.043073309 |
| cov2_8_10_11 | 18.7257 | -385.204 | 0.3965097 | 0 | 0           | 0 | -0.049849103 |
| cov1_3_6_8   | 18.7395 | -385.211 | 0.405272  | 0 | -0.16870438 | 0 | 0            |
| cov2_9_10_11 | 18.7621 | -385.222 | 0.3961456 | 0 | 0           | 0 | -0.051575536 |

|              |         |          |           |   |             |   |              |
|--------------|---------|----------|-----------|---|-------------|---|--------------|
| cov1_3_5_8   | 18.7724 | -385.227 | 0.4062202 | 0 | -0.17099573 | 0 | 0            |
| cov2_6_9_11  | 18.8039 | -385.243 | 0.3961079 | 0 | 0           | 0 | -0.039734784 |
| cov1_3_6_7   | 18.8122 | -385.247 | 0.4050988 | 0 | -0.16789328 | 0 | 0            |
| cov2_6_7_9   | 18.823  | -385.252 | 0.3968483 | 0 | 0           | 0 | -0.043539418 |
| cov2_7_9_11  | 18.84   | -385.261 | 0.396489  | 0 | 0           | 0 | -0.049605085 |
| cov1_3_5_6   | 18.8448 | -385.263 | 0.4049074 | 0 | -0.17886269 | 0 | 0            |
| cov1_3_6_11  | 18.8496 | -385.266 | 0.4047796 | 0 | -0.1714472  | 0 | 0            |
| cov2_6_8_9   | 18.8512 | -385.267 | 0.3966489 | 0 | 0           | 0 | -0.043668066 |
| cov1_2_3_6   | 18.8656 | -385.274 | 0.4046661 | 0 | -0.17069604 | 0 | 0.006714847  |
| cov1_3_4_6   | 18.8706 | -385.276 | 0.4044691 | 0 | -0.16282937 | 0 | 0            |
| cov6_7_10_11 | 18.8802 | -385.281 | 0.3963117 | 0 | 0           | 0 | 0            |
| cov2_8_9_11  | 18.8892 | -385.286 | 0.3963259 | 0 | 0           | 0 | -0.050555584 |
| cov1_3_8_11  | 18.8913 | -385.287 | 0.4053515 | 0 | -0.13983386 | 0 | 0            |
| cov1_3_5_7   | 18.9112 | -385.297 | 0.405854  | 0 | -0.16190756 | 0 | 0            |
| cov2_7_9_10  | 18.9284 | -385.305 | 0.3971832 | 0 | 0           | 0 | -0.0671958   |
| cov6_8_10_11 | 18.9331 | -385.307 | 0.3961316 | 0 | 0           | 0 | 0            |
| cov2_8_9_10  | 18.9547 | -385.318 | 0.3969953 | 0 | 0           | 0 | -0.067289162 |
| cov1_2_3_8   | 18.9565 | -385.319 | 0.4050379 | 0 | -0.13243544 | 0 | 0.007700149  |
| cov1_3_4_8   | 18.964  | -385.323 | 0.4052716 | 0 | -0.12867489 | 0 | 0            |
| cov6_9_10_11 | 18.9719 | -385.327 | 0.3957869 | 0 | 0           | 0 | 0            |
| cov1_3_7_11  | 18.9797 | -385.331 | 0.4051378 | 0 | -0.13746027 | 0 | 0            |
| cov1_2_3_7   | 19.0316 | -385.357 | 0.4048515 | 0 | -0.13141352 | 0 | 0.007831823  |
| cov3_7_8_10  | 19.0329 | -385.357 | 0.3990992 | 0 | 0           | 0 | 0            |
| cov1_3_5_11  | 19.039  | -385.36  | 0.4047811 | 0 | -0.143387   | 0 | 0            |
| cov1_3_4_7   | 19.0417 | -385.362 | 0.40497   | 0 | -0.12604612 | 0 | 0            |
| cov1_3_4_5   | 19.0443 | -385.363 | 0.4040998 | 0 | -0.13596484 | 0 | 0            |
| cov1_2_3_11  | 19.0532 | -385.368 | 0.4045669 | 0 | -0.13760164 | 0 | 0.007083855  |
| cov1_3_4_11  | 19.0601 | -385.371 | 0.4044265 | 0 | -0.12985839 | 0 | 0            |
| cov1_2_4_6   | 19.0606 | -385.371 | 0.4011377 | 0 | -0.16630867 | 0 | 0.025159826  |
| cov1_2_3_5   | 19.0616 | -385.372 | 0.404666  | 0 | -0.14213819 | 0 | 0.007351242  |
| cov6_7_9_11  | 19.0675 | -385.375 | 0.3961695 | 0 | 0           | 0 | 0            |
| cov1_4_6_11  | 19.0732 | -385.378 | 0.4018156 | 0 | -0.16349754 | 0 | 0            |
| cov1_2_3_4   | 19.0772 | -385.379 | 0.4039457 | 0 | -0.12762905 | 0 | 0.013636956  |
| cov1_4_6_7   | 19.1058 | -385.394 | 0.4018145 | 0 | -0.15243416 | 0 | 0            |
| cov6_7_9_10  | 19.1107 | -385.396 | 0.3966871 | 0 | 0           | 0 | 0            |
| cov6_8_9_11  | 19.121  | -385.401 | 0.395989  | 0 | 0           | 0 | 0            |
| cov1_6_7_11  | 19.1221 | -385.402 | 0.4025418 | 0 | -0.17193535 | 0 | 0            |
| cov1_4_5_6   | 19.1306 | -385.406 | 0.4011018 | 0 | -0.15945128 | 0 | 0            |
| cov1_4_6_8   | 19.1323 | -385.407 | 0.4016137 | 0 | -0.15266963 | 0 | 0            |
| cov1_5_6_11  | 19.1356 | -385.409 | 0.4023493 | 0 | -0.16766651 | 0 | 0            |
| cov1_2_6_11  | 19.1371 | -385.409 | 0.4022794 | 0 | -0.1800502  | 0 | 0.006874736  |
| cov6_8_9_10  | 19.1403 | -385.411 | 0.3964815 | 0 | 0           | 0 | 0            |
| cov1_6_8_11  | 19.1417 | -385.412 | 0.4023872 | 0 | -0.17368828 | 0 | 0            |
| cov1_5_6_7   | 19.156  | -385.419 | 0.4024031 | 0 | -0.15445592 | 0 | 0            |
| cov1_2_6_7   | 19.1573 | -385.42  | 0.402324  | 0 | -0.16913529 | 0 | 0.008050164  |
| cov1_2_6_8   | 19.1888 | -385.435 | 0.4021431 | 0 | -0.1698912  | 0 | 0.008151179  |
| cov1_5_6_8   | 19.1891 | -385.435 | 0.4022169 | 0 | -0.15557071 | 0 | 0            |

|              |         |          |           |   |             |   |              |
|--------------|---------|----------|-----------|---|-------------|---|--------------|
| cov1_2_5_6   | 19.1961 | -385.439 | 0.4019244 | 0 | -0.16370091 | 0 | 0.008574676  |
| cov3_7_8_9   | 19.1991 | -385.44  | 0.398466  | 0 | 0           | 0 | 0            |
| cov1_2_4_11  | 19.2293 | -385.456 | 0.4013349 | 0 | -0.13528042 | 0 | 0.023894891  |
| cov1_2_4_5   | 19.2441 | -385.463 | 0.4000501 | 0 | -0.14531375 | 0 | 0.03785651   |
| cov1_2_4_7   | 19.274  | -385.478 | 0.4012902 | 0 | -0.1223101  | 0 | 0.024923294  |
| cov1_4_7_11  | 19.2863 | -385.484 | 0.4018528 | 0 | -0.12142391 | 0 | 0            |
| cov1_4_5_11  | 19.2963 | -385.489 | 0.4014074 | 0 | -0.12756121 | 0 | 0            |
| cov1_2_4_8   | 19.3006 | -385.491 | 0.4010701 | 0 | -0.12253848 | 0 | 0.025628839  |
| cov1_4_8_11  | 19.302  | -385.492 | 0.4016688 | 0 | -0.12266288 | 0 | 0            |
| cov1_5_7_11  | 19.3288 | -385.505 | 0.4023907 | 0 | -0.12328728 | 0 | 0            |
| cov1_2_7_11  | 19.3307 | -385.506 | 0.402289  | 0 | -0.13814526 | 0 | 0.008087557  |
| cov1_2_5_11  | 19.3437 | -385.513 | 0.4020937 | 0 | -0.13344856 | 0 | 0.008315953  |
| cov1_5_8_11  | 19.3513 | -385.517 | 0.4022193 | 0 | -0.1254794  | 0 | 0            |
| cov1_2_8_11  | 19.3518 | -385.517 | 0.402122  | 0 | -0.13982811 | 0 | 0.00804952   |
| cov1_4_5_7   | 19.3519 | -385.517 | 0.4014363 | 0 | -0.11109976 | 0 | 0            |
| cov1_2_5_7   | 19.3776 | -385.53  | 0.4021354 | 0 | -0.1180455  | 0 | 0.009791619  |
| cov1_4_5_8   | 19.381  | -385.531 | 0.4011713 | 0 | -0.1119462  | 0 | 0            |
| cov1_2_5_8   | 19.415  | -385.548 | 0.401936  | 0 | -0.11886631 | 0 | 0.00989556   |
| cov7_9_10_11 | 19.4185 | -385.55  | 0.3959036 | 0 | 0           | 0 | 0            |
| cov5_6_7_8   | 19.435  | -385.558 | 0.4026927 | 0 | 0           | 0 | 0            |
| cov2_5_7_8   | 19.4947 | -385.588 | 0.4031592 | 0 | 0           | 0 | -0.043484344 |
| cov8_9_10_11 | 19.4972 | -385.589 | 0.3957341 | 0 | 0           | 0 | 0            |
| cov3_7_8     | 19.6352 | -389.173 | 0.4062189 | 0 | 0           | 0 | 0            |
| cov5_7_8_11  | 19.7456 | -385.714 | 0.4030836 | 0 | 0           | 0 | 0            |
| cov4_6_7_8   | 19.7678 | -385.725 | 0.400774  | 0 | 0           | 0 | 0            |
| cov3_5_7_8   | 19.8528 | -385.767 | 0.4018642 | 0 | 0           | 0 | 0            |
| cov2_6_7_8   | 19.8866 | -385.784 | 0.4020142 | 0 | 0           | 0 | -0.046020257 |
| cov7_8_9_10  | 19.9627 | -385.822 | 0.3957225 | 0 | 0           | 0 | 0            |
| cov4_5_7_8   | 20.0045 | -385.843 | 0.4037631 | 0 | 0           | 0 | 0            |
| cov3_8_9_10  | 20.1585 | -385.92  | 0.3996143 | 0 | 0           | 0 | 0            |
| cov3_6_7_8   | 20.2017 | -385.942 | 0.4041799 | 0 | 0           | 0 | 0            |
| cov6_7_8_11  | 20.2249 | -385.953 | 0.4017035 | 0 | 0           | 0 | 0            |
| cov3_7_9_10  | 20.3285 | -386.005 | 0.3995175 | 0 | 0           | 0 | 0            |
| cov2_7_8_11  | 20.4706 | -386.076 | 0.4022253 | 0 | 0           | 0 | -0.071841923 |
| cov4_7_8_11  | 20.4911 | -386.086 | 0.4003338 | 0 | 0           | 0 | 0            |
| cov2_5_6_7   | 20.544  | -386.113 | 0.4032328 | 0 | 0           | 0 | -0.030487619 |
| cov2_4_7_8   | 20.5516 | -386.117 | 0.401827  | 0 | 0           | 0 | -0.064627989 |
| cov2_3_5_6   | 20.5675 | -386.125 | 0.4040632 | 0 | 0           | 0 | -0.034689861 |
| cov2_5_6_8   | 20.599  | -386.14  | 0.4030428 | 0 | 0           | 0 | -0.030719641 |
| cov2_4_5_7   | 20.6219 | -386.152 | 0.4045024 | 0 | 0           | 0 | -0.05134271  |
| cov2_5_7_11  | 20.6242 | -386.153 | 0.4033187 | 0 | 0           | 0 | -0.036557988 |
| cov2_4_5_6   | 20.6506 | -386.166 | 0.402735  | 0 | 0           | 0 | -0.034351583 |
| cov2_5_6_11  | 20.6536 | -386.168 | 0.402445  | 0 | 0           | 0 | -0.030494406 |
| cov2_3_5_7   | 20.6837 | -386.183 | 0.4033121 | 0 | 0           | 0 | -0.040454963 |
| cov2_4_5_8   | 20.6874 | -386.185 | 0.4042589 | 0 | 0           | 0 | -0.05094017  |
| cov2_5_8_11  | 20.6909 | -386.186 | 0.4031704 | 0 | 0           | 0 | -0.037366064 |
| cov5_6_7_11  | 20.6924 | -386.187 | 0.4031543 | 0 | 0           | 0 | 0            |



|               |         |          |           |   |              |   |              |
|---------------|---------|----------|-----------|---|--------------|---|--------------|
| cov2_3_4_5    | 20.6963 | -386.189 | 0.4053336 | 0 | 0            | 0 | -0.059143488 |
| cov2_3_5_11   | 20.7099 | -386.196 | 0.4039712 | 0 | 0            | 0 | -0.043181691 |
| cov2_3_7_8    | 20.7273 | -386.205 | 0.4051863 | 0 | 0            | 0 | -0.10047415  |
| cov4_5_6_7    | 20.7291 | -386.205 | 0.403058  | 0 | 0            | 0 | 0            |
| cov3_5_6_7    | 20.7402 | -386.211 | 0.4031247 | 0 | 0            | 0 | 0            |
| cov2_3_5_8    | 20.7445 | -386.213 | 0.4036665 | 0 | 0            | 0 | -0.043693734 |
| cov2_4_5_11   | 20.7595 | -386.221 | 0.4031115 | 0 | 0            | 0 | -0.045699791 |
| cov5_6_8_11   | 20.7607 | -386.221 | 0.4029949 | 0 | 0            | 0 | 0            |
| cov3_5_6_11   | 20.7751 | -386.228 | 0.4037601 | 0 | 0            | 0 | 0            |
| cov4_5_6_8    | 20.7819 | -386.232 | 0.4028057 | 0 | 0            | 0 | 0            |
| cov3_4_5_6    | 20.7943 | -386.238 | 0.4032709 | 0 | 0            | 0 | 0            |
| cov3_5_6_8    | 20.7994 | -386.241 | 0.4034814 | 0 | 0            | 0 | 0            |
| cov4_5_6_11   | 20.8077 | -386.245 | 0.4019505 | 0 | 0            | 0 | 0            |
| cov3_5_7_11   | 20.8921 | -386.287 | 0.4025334 | 0 | 0            | 0 | 0            |
| cov4_5_7_11   | 20.9273 | -386.305 | 0.4032791 | 0 | 0            | 0 | 0            |
| cov2_3_6_11   | 20.9354 | -386.309 | 0.4047501 | 0 | 0            | 0 | -0.047133019 |
| cov2_3_4_6    | 20.9402 | -386.311 | 0.4036583 | 0 | 0            | 0 | -0.03614292  |
| cov2_3_6_8    | 20.9567 | -386.319 | 0.4053982 | 0 | 0            | 0 | -0.053047584 |
| cov4_5_8_11   | 21.0032 | -386.342 | 0.4030835 | 0 | 0            | 0 | 0            |
| cov3_5_8_11   | 21.0035 | -386.343 | 0.4028361 | 0 | 0            | 0 | 0            |
| cov3_4_6_11   | 21.006  | -386.344 | 0.4024541 | 0 | 0            | 0 | 0            |
| cov2_3_6_7    | 21.0071 | -386.344 | 0.405168  | 0 | 0            | 0 | -0.052569499 |
| cov3_4_5_7    | 21.0271 | -386.354 | 0.4020814 | 0 | 0            | 0 | 0            |
| cov2_4_6_7    | 21.0328 | -386.357 | 0.4017072 | 0 | 0            | 0 | -0.026630592 |
| cov4_6_7_11   | 21.0348 | -386.358 | 0.4011068 | 0 | 0            | 0 | 0            |
| cov2_4_6_11   | 21.0521 | -386.367 | 0.400856  | 0 | 0            | 0 | -0.021682542 |
| cov2_4_6_8    | 21.0705 | -386.376 | 0.4014896 | 0 | 0            | 0 | -0.026097439 |
| cov4_6_8_11   | 21.0848 | -386.383 | 0.4009192 | 0 | 0            | 0 | 0            |
| cov3_4_5_11   | 21.1074 | -386.395 | 0.4029418 | 0 | 0            | 0 | 0            |
| cov3_4_6_8    | 21.1139 | -386.398 | 0.4026222 | 0 | 0            | 0 | 0            |
| cov3_4_6_7    | 21.1186 | -386.4   | 0.4022839 | 0 | 0            | 0 | 0            |
| cov3_4_5_8    | 21.1436 | -386.413 | 0.4023355 | 0 | 0            | 0 | 0            |
| cov2_6_7_11   | 21.1979 | -386.44  | 0.4024492 | 0 | 0            | 0 | -0.045335153 |
| cov2_6_8_11   | 21.2632 | -386.473 | 0.4022863 | 0 | 0            | 0 | -0.046005719 |
| cov3_4_7_8    | 21.3251 | -386.503 | 0.399086  | 0 | 0            | 0 | 0            |
| cov2_3_4_11   | 21.3586 | -386.52  | 0.4034089 | 0 | 0            | 0 | -0.054052041 |
| cov2_4_7_11   | 21.391  | -386.536 | 0.4015481 | 0 | 0            | 0 | -0.042505239 |
| cov3_6_8_11   | 21.4204 | -386.551 | 0.4048216 | 0 | 0            | 0 | 0            |
| cov3_6_7_11   | 21.4382 | -386.56  | 0.4045683 | 0 | 0            | 0 | 0            |
| cov2_4_8_11   | 21.4539 | -386.568 | 0.4013756 | 0 | 0            | 0 | -0.042730377 |
| cov2_3_8_11   | 21.484  | -386.583 | 0.4052682 | 0 | 0            | 0 | -0.077026006 |
| cov2_3_7_11   | 21.4923 | -386.587 | 0.4050158 | 0 | 0            | 0 | -0.075422926 |
| cov1_3_7_8_10 | 21.5229 | -383.088 | 0.4000584 | 0 | -0.095280898 | 0 | 0            |
| cov3_5_7_8_10 | 21.6001 | -383.126 | 0.39671   | 0 | 0            | 0 | 0            |
| cov3_4_7_11   | 21.7004 | -386.691 | 0.4005866 | 0 | 0            | 0 | 0            |
| cov5_6_7_8_10 | 21.7276 | -383.19  | 0.394121  | 0 | 0            | 0 | 0            |
| cov2_3_4_8    | 21.7368 | -386.709 | 0.4038555 | 0 | 0            | 0 | -0.073174805 |

|                |         |          |           |   |              |   |              |
|----------------|---------|----------|-----------|---|--------------|---|--------------|
| cov2_3_4_7     | 21.7373 | -386.71  | 0.4034257 | 0 | 0            | 0 | -0.06995674  |
| cov3_4_8_11    | 21.7685 | -386.725 | 0.4008661 | 0 | 0            | 0 | 0            |
| cov1_3_7_8_9   | 21.8604 | -383.257 | 0.3997582 | 0 | -0.094489368 | 0 | 0            |
| cov2_5_7_8_10  | 21.9293 | -383.291 | 0.3942785 | 0 | 0            | 0 | 0.014677843  |
| cov5_7_8_10_11 | 21.9559 | -383.304 | 0.394603  | 0 | 0            | 0 | 0            |
| cov5_7_8_9_10  | 21.9751 | -383.314 | 0.3946133 | 0 | 0            | 0 | 0            |
| cov4_5_7_8_10  | 21.9784 | -383.316 | 0.3944665 | 0 | 0            | 0 | 0            |
| cov1_5_7_8_10  | 21.979  | -383.316 | 0.3945469 | 0 | -0.000515315 | 0 | 0            |
| cov3_5_7_8_9   | 21.9907 | -383.322 | 0.3963772 | 0 | 0            | 0 | 0            |
| cov1_3_6_8_10  | 22.0423 | -383.347 | 0.401089  | 0 | -0.16188073  | 0 | 0            |
| cov3_7_8_11    | 22.0817 | -386.882 | 0.404014  | 0 | 0            | 0 | 0            |
| cov5_6_7_8_9   | 22.0886 | -383.371 | 0.3940115 | 0 | 0            | 0 | 0            |
| cov1_3_6_7_10  | 22.2526 | -383.453 | 0.4010546 | 0 | -0.16194962  | 0 | 0            |
| cov2_5_7_8_9   | 22.2717 | -383.462 | 0.3942415 | 0 | 0            | 0 | 0.011149623  |
| cov5_7_8_9_11  | 22.2799 | -383.466 | 0.3944869 | 0 | 0            | 0 | 0            |
| cov1_5_7_8_9   | 22.2973 | -383.475 | 0.3945339 | 0 | -0.005974961 | 0 | 0            |
| cov4_5_7_8_9   | 22.2982 | -383.475 | 0.3942979 | 0 | 0            | 0 | 0            |
| cov1_3_5_6_10  | 22.3805 | -383.517 | 0.3978864 | 0 | -0.086818981 | 0 | 0            |
| cov1_3_6_8_9   | 22.4042 | -383.528 | 0.4007613 | 0 | -0.16017969  | 0 | 0            |
| cov1_4_7_8_10  | 22.5095 | -383.581 | 0.394142  | 0 | -0.057562328 | 0 | 0            |
| cov1_3_5_8_10  | 22.5202 | -383.586 | 0.3996922 | 0 | -0.065039649 | 0 | 0            |
| cov1_3_8_10_11 | 22.5464 | -383.6   | 0.4010946 | 0 | -0.10739088  | 0 | 0            |
| cov1_3_4_8_10  | 22.5475 | -383.6   | 0.3998871 | 0 | -0.084552119 | 0 | 0            |
| cov1_2_3_8_10  | 22.5631 | -383.608 | 0.4007386 | 0 | -0.10736754  | 0 | 0.012983109  |
| cov1_3_8_9_10  | 22.5768 | -383.615 | 0.4009913 | 0 | -0.097286404 | 0 | 0            |
| cov1_6_7_8_10  | 22.5883 | -383.621 | 0.3963599 | 0 | -0.14233716  | 0 | 0            |
| cov1_3_6_7_9   | 22.6013 | -383.627 | 0.4007252 | 0 | -0.16020363  | 0 | 0            |
| cov1_2_5_6_10  | 22.6515 | -383.652 | 0.3949955 | 0 | -0.079112678 | 0 | 0.01842452   |
| cov3_5_6_8_10  | 22.6678 | -383.66  | 0.3967123 | 0 | 0            | 0 | 0            |
| cov1_5_6_10_11 | 22.6877 | -383.67  | 0.3953701 | 0 | -0.072044215 | 0 | 0            |
| cov1_5_6_7_10  | 22.6918 | -383.672 | 0.3953667 | 0 | -0.064405446 | 0 | 0            |
| cov1_3_5_7_10  | 22.6958 | -383.674 | 0.3993266 | 0 | -0.056337032 | 0 | 0            |
| cov1_4_5_6_10  | 22.7018 | -383.677 | 0.3948615 | 0 | -0.066904771 | 0 | 0            |
| cov1_5_6_8_10  | 22.7085 | -383.681 | 0.3951854 | 0 | -0.065235702 | 0 | 0            |
| cov1_5_6_9_10  | 22.7087 | -383.681 | 0.3951379 | 0 | -0.065919792 | 0 | 0            |
| cov1_3_4_6_10  | 22.7213 | -383.687 | 0.398404  | 0 | -0.13447682  | 0 | 0            |
| cov1_3_5_6_9   | 22.7277 | -383.69  | 0.3977779 | 0 | -0.091230239 | 0 | 0            |
| cov1_4_7_8_9   | 22.734  | -383.693 | 0.3940792 | 0 | -0.057855755 | 0 | 0            |
| cov3_5_6_7_10  | 22.744  | -383.698 | 0.3965062 | 0 | 0            | 0 | 0            |
| cov1_3_4_7_10  | 22.7552 | -383.704 | 0.3997313 | 0 | -0.082819856 | 0 | 0            |
| cov3_5_6_10_11 | 22.7685 | -383.711 | 0.3961466 | 0 | 0            | 0 | 0            |
| cov1_3_7_10_11 | 22.7732 | -383.713 | 0.4010186 | 0 | -0.10579969  | 0 | 0            |
| cov1_2_3_7_10  | 22.7807 | -383.717 | 0.4006796 | 0 | -0.10691318  | 0 | 0.013000151  |
| cov2_3_5_6_10  | 22.7858 | -383.719 | 0.396224  | 0 | 0            | 0 | -0.002599764 |
| cov3_4_5_6_10  | 22.7864 | -383.72  | 0.396247  | 0 | 0            | 0 | 0            |
| cov3_5_6_9_10  | 22.7865 | -383.72  | 0.3961964 | 0 | 0            | 0 | 0            |
| cov3_5_8_9_10  | 22.7881 | -383.72  | 0.3975893 | 0 | 0            | 0 | 0            |

|                |         |          |           |   |              |   |              |
|----------------|---------|----------|-----------|---|--------------|---|--------------|
| cov2_3_5_8_10  | 22.7913 | -383.722 | 0.3975708 | 0 | 0            | 0 | -0.001351831 |
| cov3_4_5_8_10  | 22.7915 | -383.722 | 0.3974766 | 0 | 0            | 0 | 0            |
| cov3_5_8_10_11 | 22.7916 | -383.722 | 0.3975271 | 0 | 0            | 0 | 0            |
| cov3_4_7_8_10  | 22.7941 | -383.723 | 0.3947803 | 0 | 0            | 0 | 0            |
| cov1_3_7_9_10  | 22.7951 | -383.724 | 0.4009417 | 0 | -0.096804166 | 0 | 0            |
| cov1_6_7_8_9   | 22.7952 | -383.724 | 0.3962464 | 0 | -0.14133127  | 0 | 0            |
| cov1_2_4_6_10  | 22.7959 | -383.724 | 0.3933821 | 0 | -0.15136015  | 0 | 0.059231666  |
| cov1_2_3_6_10  | 22.8774 | -383.765 | 0.4002272 | 0 | -0.16367555  | 0 | 0.011331229  |
| cov1_3_8_9_11  | 22.887  | -383.77  | 0.4008191 | 0 | -0.10751935  | 0 | 0            |
| cov1_7_8_10_11 | 22.8897 | -383.771 | 0.3963786 | 0 | -0.10087338  | 0 | 0            |
| cov1_3_5_8_9   | 22.8899 | -383.771 | 0.3995629 | 0 | -0.069143281 | 0 | 0            |
| cov1_3_6_9_10  | 22.8922 | -383.772 | 0.4004045 | 0 | -0.15492365  | 0 | 0            |
| cov1_2_7_8_10  | 22.8946 | -383.774 | 0.3960853 | 0 | -0.10267038  | 0 | 0.014583602  |
| cov3_5_7_9_10  | 22.8946 | -383.774 | 0.3974862 | 0 | 0            | 0 | 0            |
| cov1_2_3_5_10  | 22.8958 | -383.774 | 0.3976688 | 0 | -0.038709146 | 0 | 0.017483116  |
| cov1_3_4_8_9   | 22.8961 | -383.774 | 0.3995829 | 0 | -0.083719622 | 0 | 0            |
| cov2_3_5_7_10  | 22.8981 | -383.775 | 0.3973754 | 0 | 0            | 0 | 0.001095849  |
| cov3_4_5_7_10  | 22.8983 | -383.776 | 0.3974121 | 0 | 0            | 0 | 0            |
| cov3_5_7_10_11 | 22.8983 | -383.776 | 0.3974194 | 0 | 0            | 0 | 0            |
| cov1_3_6_10_11 | 22.8992 | -383.776 | 0.4002621 | 0 | -0.15352132  | 0 | 0            |
| cov1_2_3_8_9   | 22.9189 | -383.786 | 0.4004579 | 0 | -0.10514547  | 0 | 0.011233532  |
| cov1_7_8_9_10  | 22.9247 | -383.789 | 0.3962558 | 0 | -0.090919299 | 0 | 0            |
| cov5_6_7_10_11 | 22.9294 | -383.791 | 0.3946667 | 0 | 0            | 0 | 0            |
| cov2_5_6_7_10  | 22.9313 | -383.792 | 0.3946812 | 0 | 0            | 0 | 0.002173425  |
| cov5_6_7_9_10  | 22.9318 | -383.792 | 0.3947362 | 0 | 0            | 0 | 0            |
| cov4_5_6_7_10  | 22.9322 | -383.792 | 0.394684  | 0 | 0            | 0 | 0            |
| cov1_3_5_10_11 | 22.9399 | -383.796 | 0.3979186 | 0 | -0.029937342 | 0 | 0            |
| cov1_3_5_9_10  | 22.9414 | -383.797 | 0.3979744 | 0 | -0.026785613 | 0 | 0            |
| cov1_3_4_5_10  | 22.9484 | -383.801 | 0.3979148 | 0 | -0.025791203 | 0 | 0            |
| cov2_5_6_8_10  | 22.9546 | -383.804 | 0.3944852 | 0 | 0            | 0 | 0.002086741  |
| cov5_6_8_10_11 | 22.9546 | -383.804 | 0.3944901 | 0 | 0            | 0 | 0            |
| cov4_5_6_8_10  | 22.9547 | -383.804 | 0.3944343 | 0 | 0            | 0 | 0            |
| cov5_6_8_9_10  | 22.955  | -383.804 | 0.3945381 | 0 | 0            | 0 | 0            |
| cov2_4_5_6_10  | 22.9558 | -383.804 | 0.3940731 | 0 | 0            | 0 | 0.005212791  |
| cov4_5_6_9_10  | 22.9594 | -383.806 | 0.3942656 | 0 | 0            | 0 | 0            |
| cov4_5_6_10_11 | 22.9596 | -383.806 | 0.3942237 | 0 | 0            | 0 | 0            |
| cov2_5_6_9_10  | 22.9603 | -383.807 | 0.3943377 | 0 | 0            | 0 | 0.00205812   |
| cov2_5_6_10_11 | 22.9605 | -383.807 | 0.3942915 | 0 | 0            | 0 | 0.002235039  |
| cov5_6_9_10_11 | 22.9611 | -383.807 | 0.3943527 | 0 | 0            | 0 | 0            |
| cov2_3_5_9_10  | 22.991  | -383.822 | 0.3969309 | 0 | 0            | 0 | 0.006636301  |
| cov1_3_4_6_9   | 22.9941 | -383.823 | 0.3981521 | 0 | -0.13365279  | 0 | 0            |
| cov2_3_4_5_10  | 22.9943 | -383.824 | 0.3967143 | 0 | 0            | 0 | 0.007956514  |
| cov2_3_5_10_11 | 22.9947 | -383.824 | 0.3968564 | 0 | 0            | 0 | 0.006975514  |
| cov1_2_5_6_9   | 22.9979 | -383.825 | 0.3949704 | 0 | -0.082227118 | 0 | 0.016111709  |
| cov3_4_5_9_10  | 22.9994 | -383.826 | 0.3972576 | 0 | 0            | 0 | 0            |
| cov3_5_9_10_11 | 23.0007 | -383.827 | 0.3971489 | 0 | 0            | 0 | 0            |
| cov3_4_5_10_11 | 23.0037 | -383.828 | 0.3971727 | 0 | 0            | 0 | 0            |

|                |         |          |           |   |              |   |              |
|----------------|---------|----------|-----------|---|--------------|---|--------------|
| cov1_5_6_9_11  | 23.0131 | -383.833 | 0.3953514 | 0 | -0.077561993 | 0 | 0            |
| cov1_5_6_7_9   | 23.0219 | -383.837 | 0.3953289 | 0 | -0.068982274 | 0 | 0            |
| cov1_4_5_6_9   | 23.0275 | -383.84  | 0.3947329 | 0 | -0.071909671 | 0 | 0            |
| cov1_2_3_4_10  | 23.0338 | -383.843 | 0.3967526 | 0 | -0.091748132 | 0 | 0.044104015  |
| cov1_5_6_8_9   | 23.0402 | -383.846 | 0.3951473 | 0 | -0.069831083 | 0 | 0            |
| cov1_3_5_7_9   | 23.0565 | -383.855 | 0.3991891 | 0 | -0.060308686 | 0 | 0            |
| cov1_2_4_6_9   | 23.0761 | -383.864 | 0.3933758 | 0 | -0.14925454  | 0 | 0.055709268  |
| cov3_4_7_8_9   | 23.0809 | -383.867 | 0.3943671 | 0 | 0            | 0 | 0            |
| cov1_7_8_9_11  | 23.0851 | -383.869 | 0.3962991 | 0 | -0.10105708  | 0 | 0            |
| cov3_5_6_8_9   | 23.0856 | -383.869 | 0.396406  | 0 | 0            | 0 | 0            |
| cov1_3_4_7_9   | 23.0896 | -383.871 | 0.3994239 | 0 | -0.08198326  | 0 | 0            |
| cov1_3_7_9_11  | 23.1006 | -383.877 | 0.4007425 | 0 | -0.10591514  | 0 | 0            |
| cov1_2_7_8_9   | 23.1023 | -383.878 | 0.3960138 | 0 | -0.1010531   | 0 | 0.013153924  |
| cov4_7_8_10_11 | 23.1208 | -383.887 | 0.3923795 | 0 | 0            | 0 | 0            |
| cov1_2_3_7_9   | 23.1223 | -383.888 | 0.4004097 | 0 | -0.10474961  | 0 | 0.01130487   |
| cov1_2_4_5_10  | 23.1483 | -383.9   | 0.3938131 | 0 | -0.035998383 | 0 | 0.03925917   |
| cov1_2_3_6_9   | 23.1492 | -383.901 | 0.3999828 | 0 | -0.16133986  | 0 | 0.009772787  |
| cov3_5_6_7_9   | 23.1496 | -383.901 | 0.3961963 | 0 | 0            | 0 | 0            |
| cov3_5_6_9_11  | 23.1626 | -383.908 | 0.3959195 | 0 | 0            | 0 | 0            |
| cov1_3_6_9_11  | 23.1659 | -383.909 | 0.4000288 | 0 | -0.15348529  | 0 | 0            |
| cov4_6_7_8_10  | 23.1675 | -383.91  | 0.3927359 | 0 | 0            | 0 | 0            |
| cov2_3_5_6_9   | 23.1701 | -383.911 | 0.3960553 | 0 | 0            | 0 | -0.005546485 |
| cov3_4_5_6_9   | 23.1762 | -383.914 | 0.3959021 | 0 | 0            | 0 | 0            |
| cov2_3_5_8_9   | 23.1904 | -383.922 | 0.397345  | 0 | 0            | 0 | -0.004089041 |
| cov3_4_5_8_9   | 23.1918 | -383.922 | 0.397066  | 0 | 0            | 0 | 0            |
| cov3_5_8_9_11  | 23.1938 | -383.923 | 0.3971976 | 0 | 0            | 0 | 0            |
| cov1_2_5_10_11 | 23.1971 | -383.925 | 0.3951562 | 0 | -0.026969867 | 0 | 0.018866731  |
| cov2_4_5_7_10  | 23.2046 | -383.929 | 0.3943071 | 0 | 0            | 0 | 0.021306499  |
| cov1_4_6_10_11 | 23.2127 | -383.933 | 0.3950401 | 0 | -0.12835022  | 0 | 0            |
| cov2_4_5_10_11 | 23.2133 | -383.933 | 0.3941204 | 0 | 0            | 0 | 0.019566063  |
| cov1_2_5_7_10  | 23.2136 | -383.933 | 0.3951197 | 0 | -0.016213664 | 0 | 0.019899736  |
| cov2_4_5_9_10  | 23.2192 | -383.936 | 0.3939855 | 0 | 0            | 0 | 0.022224851  |
| cov2_4_5_8_10  | 23.2211 | -383.937 | 0.394015  | 0 | 0            | 0 | 0.022102953  |
| cov2_5_7_10_11 | 23.2221 | -383.937 | 0.3950448 | 0 | 0            | 0 | 0.012708999  |
| cov1_4_6_8_10  | 23.228  | -383.94  | 0.3945359 | 0 | -0.12195466  | 0 | 0            |
| cov2_5_7_9_10  | 23.2284 | -383.941 | 0.3950416 | 0 | 0            | 0 | 0.01470047   |
| cov1_4_6_9_10  | 23.2336 | -383.943 | 0.3948092 | 0 | -0.12231138  | 0 | 0            |
| cov1_2_5_9_10  | 23.2352 | -383.944 | 0.394864  | 0 | -0.01813367  | 0 | 0.020332204  |
| cov1_4_6_7_10  | 23.2355 | -383.944 | 0.3947619 | 0 | -0.12204722  | 0 | 0            |
| cov1_2_5_8_10  | 23.2365 | -383.945 | 0.3949167 | 0 | -0.016825098 | 0 | 0.020028159  |
| cov2_4_7_8_10  | 23.2372 | -383.945 | 0.3919675 | 0 | 0            | 0 | 0.006054082  |
| cov2_5_9_10_11 | 23.2398 | -383.946 | 0.3948288 | 0 | 0            | 0 | 0.01193112   |
| cov1_2_3_5_9   | 23.2404 | -383.947 | 0.3976347 | 0 | -0.042612086 | 0 | 0.015292506  |
| cov2_5_8_10_11 | 23.2409 | -383.947 | 0.3948557 | 0 | 0            | 0 | 0.012154926  |
| cov4_7_8_9_10  | 23.2411 | -383.947 | 0.3921752 | 0 | 0            | 0 | 0            |
| cov1_5_7_10_11 | 23.2468 | -383.95  | 0.3954873 | 0 | -0.011284132 | 0 | 0            |
| cov1_3_4_9_10  | 23.2509 | -383.952 | 0.3986286 | 0 | -0.073726078 | 0 | 0            |

|                |         |          |           |   |              |   |              |
|----------------|---------|----------|-----------|---|--------------|---|--------------|
| cov2_5_8_9_10  | 23.2529 | -383.953 | 0.3948331 | 0 | 0            | 0 | 0.014634989  |
| cov5_7_9_10_11 | 23.253  | -383.953 | 0.395363  | 0 | 0            | 0 | 0            |
| cov1_5_9_10_11 | 23.255  | -383.954 | 0.3953755 | 0 | -0.014025381 | 0 | 0            |
| cov1_3_4_10_11 | 23.2551 | -383.954 | 0.3985352 | 0 | -0.075912591 | 0 | 0            |
| cov1_4_5_10_11 | 23.2554 | -383.954 | 0.3951742 | 0 | -0.014090642 | 0 | 0            |
| cov4_5_7_10_11 | 23.2556 | -383.954 | 0.3952252 | 0 | 0            | 0 | 0            |
| cov1_5_8_10_11 | 23.2588 | -383.956 | 0.3953205 | 0 | -0.01335058  | 0 | 0            |
| cov1_3_5_9_11  | 23.2671 | -383.96  | 0.3978584 | 0 | -0.03620804  | 0 | 0            |
| cov4_5_9_10_11 | 23.2678 | -383.96  | 0.3949802 | 0 | 0            | 0 | 0            |
| cov5_8_9_10_11 | 23.2691 | -383.961 | 0.3951603 | 0 | 0            | 0 | 0            |
| cov4_5_8_10_11 | 23.2701 | -383.961 | 0.3949724 | 0 | 0            | 0 | 0            |
| cov4_5_7_9_10  | 23.2776 | -383.965 | 0.3952318 | 0 | 0            | 0 | 0            |
| cov1_5_7_9_10  | 23.2781 | -383.965 | 0.3953342 | 0 | -0.001609247 | 0 | 0            |
| cov1_3_4_5_9   | 23.2811 | -383.967 | 0.3977476 | 0 | -0.031286348 | 0 | 0            |
| cov1_4_5_7_10  | 23.2818 | -383.967 | 0.3951633 | 0 | -0.001347203 | 0 | 0            |
| cov3_4_5_7_9   | 23.2856 | -383.969 | 0.3970028 | 0 | 0            | 0 | 0            |
| cov2_3_5_7_9   | 23.286  | -383.969 | 0.3971492 | 0 | 0            | 0 | -0.00159539  |
| cov3_5_7_9_11  | 23.2865 | -383.97  | 0.3970901 | 0 | 0            | 0 | 0            |
| cov5_6_7_9_11  | 23.296  | -383.974 | 0.3945681 | 0 | 0            | 0 | 0            |
| cov4_5_6_7_9   | 23.2966 | -383.975 | 0.3944951 | 0 | 0            | 0 | 0            |
| cov2_5_6_7_9   | 23.2978 | -383.975 | 0.3946121 | 0 | 0            | 0 | -0.000885171 |
| cov4_5_8_9_10  | 23.3001 | -383.976 | 0.3949661 | 0 | 0            | 0 | 0            |
| cov1_5_8_9_10  | 23.3019 | -383.977 | 0.3951315 | 0 | -0.002124912 | 0 | 0            |
| cov1_4_5_9_10  | 23.3034 | -383.978 | 0.394833  | 0 | -0.003153742 | 0 | 0            |
| cov1_4_5_8_10  | 23.304  | -383.978 | 0.394908  | 0 | -0.002097206 | 0 | 0            |
| cov4_5_6_8_9   | 23.3201 | -383.986 | 0.3942463 | 0 | 0            | 0 | 0            |
| cov5_6_8_9_11  | 23.3228 | -383.988 | 0.3943908 | 0 | 0            | 0 | 0            |
| cov2_5_6_8_9   | 23.3231 | -383.988 | 0.3944195 | 0 | 0            | 0 | -0.000983922 |
| cov2_4_5_6_9   | 23.3251 | -383.989 | 0.3939632 | 0 | 0            | 0 | 0.002432185  |
| cov4_5_6_9_11  | 23.326  | -383.989 | 0.3940378 | 0 | 0            | 0 | 0            |
| cov1_2_3_4_9   | 23.3274 | -383.99  | 0.3966693 | 0 | -0.090316313 | 0 | 0.041070115  |
| cov2_5_6_9_11  | 23.331  | -383.992 | 0.3942338 | 0 | 0            | 0 | -0.001118047 |
| cov2_3_7_8_10  | 23.3443 | -383.998 | 0.4003879 | 0 | 0            | 0 | -0.071456285 |
| cov1_2_3_9_10  | 23.3503 | -384.002 | 0.4001362 | 0 | -0.10481407  | 0 | 0.013387246  |
| cov4_7_8_9_11  | 23.3524 | -384.003 | 0.3922199 | 0 | 0            | 0 | 0            |
| cov1_2_4_10_11 | 23.354  | -384.003 | 0.3936506 | 0 | -0.093772706 | 0 | 0.057300853  |
| cov2_3_4_5_9   | 23.3586 | -384.006 | 0.396526  | 0 | 0            | 0 | 0.004928886  |
| cov2_3_5_9_11  | 23.3597 | -384.006 | 0.3967018 | 0 | 0            | 0 | 0.00338315   |
| cov1_2_3_10_11 | 23.3621 | -384.007 | 0.4000174 | 0 | -0.10529278  | 0 | 0.012880093  |
| cov3_4_5_9_11  | 23.3621 | -384.007 | 0.3968081 | 0 | 0            | 0 | 0            |
| cov1_2_4_8_10  | 23.3635 | -384.008 | 0.3929975 | 0 | -0.086565499 | 0 | 0.060056375  |
| cov1_2_4_9_10  | 23.372  | -384.012 | 0.3934367 | 0 | -0.087390979 | 0 | 0.059023591  |
| cov1_2_4_7_10  | 23.378  | -384.015 | 0.3932635 | 0 | -0.086589201 | 0 | 0.059114402  |
| cov1_3_9_10_11 | 23.3797 | -384.016 | 0.4002555 | 0 | -0.095601314 | 0 | 0            |
| cov4_6_7_8_9   | 23.3892 | -384.021 | 0.3925775 | 0 | 0            | 0 | 0            |
| cov3_6_7_8_10  | 23.4338 | -384.043 | 0.3995332 | 0 | 0            | 0 | 0            |
| cov1_4_6_9_11  | 23.4386 | -384.046 | 0.3949531 | 0 | -0.12867905  | 0 | 0            |

|                |         |          |           |   |              |   |              |
|----------------|---------|----------|-----------|---|--------------|---|--------------|
| cov2_4_7_8_9   | 23.4601 | -384.056 | 0.3918638 | 0 | 0            | 0 | 0.004030159  |
| cov1_4_6_8_9   | 23.4614 | -384.057 | 0.3944495 | 0 | -0.12157609  | 0 | 0            |
| cov1_4_6_7_9   | 23.4668 | -384.06  | 0.3946747 | 0 | -0.12166508  | 0 | 0            |
| cov1_2_4_5_9   | 23.471  | -384.062 | 0.3937778 | 0 | -0.040957955 | 0 | 0.0380546    |
| cov1_3_4_9_11  | 23.5156 | -384.084 | 0.3983371 | 0 | -0.076895101 | 0 | 0            |
| cov1_2_5_9_11  | 23.5193 | -384.086 | 0.3951957 | 0 | -0.031922374 | 0 | 0.016528307  |
| cov1_2_5_7_9   | 23.543  | -384.098 | 0.3951474 | 0 | -0.020186    | 0 | 0.01767051   |
| cov2_4_5_7_9   | 23.5455 | -384.099 | 0.3942833 | 0 | 0            | 0 | 0.017653207  |
| cov1_5_7_9_11  | 23.5543 | -384.104 | 0.3954947 | 0 | -0.01765928  | 0 | 0            |
| cov2_4_5_9_11  | 23.5549 | -384.104 | 0.394081  | 0 | 0            | 0 | 0.01568565   |
| cov1_4_5_9_11  | 23.559  | -384.106 | 0.3951111 | 0 | -0.020700149 | 0 | 0            |
| cov2_5_7_9_11  | 23.5602 | -384.106 | 0.3950117 | 0 | 0            | 0 | 0.009048396  |
| cov2_4_5_8_9   | 23.5641 | -384.108 | 0.3939926 | 0 | 0            | 0 | 0.018443261  |
| cov1_5_8_9_11  | 23.5667 | -384.11  | 0.3953287 | 0 | -0.019722286 | 0 | 0            |
| cov1_2_5_8_9   | 23.5676 | -384.11  | 0.3949453 | 0 | -0.020806619 | 0 | 0.017793389  |
| cov4_5_7_9_11  | 23.5752 | -384.114 | 0.395047  | 0 | 0            | 0 | 0            |
| cov2_5_8_9_11  | 23.5806 | -384.117 | 0.3948231 | 0 | 0            | 0 | 0.008486058  |
| cov4_5_8_9_11  | 23.5912 | -384.122 | 0.3947939 | 0 | 0            | 0 | 0            |
| cov1_4_5_7_9   | 23.5941 | -384.123 | 0.3950779 | 0 | -0.007130281 | 0 | 0            |
| cov2_3_7_8_9   | 23.595  | -384.124 | 0.3999033 | 0 | 0            | 0 | -0.070737597 |
| cov1_2_4_9_11  | 23.6165 | -384.135 | 0.3937116 | 0 | -0.093445637 | 0 | 0.053704035  |
| cov1_4_5_8_9   | 23.6165 | -384.135 | 0.3948243 | 0 | -0.007878586 | 0 | 0            |
| cov1_2_3_9_11  | 23.6243 | -384.139 | 0.3998327 | 0 | -0.10474399  | 0 | 0.011242585  |
| cov1_2_4_8_9   | 23.6372 | -384.145 | 0.3930693 | 0 | -0.085247041 | 0 | 0.056444753  |
| cov1_2_4_7_9   | 23.6484 | -384.151 | 0.3933333 | 0 | -0.085282945 | 0 | 0.055522788  |
| cov1_2_6_10_11 | 23.6922 | -384.172 | 0.3970865 | 0 | -0.17037904  | 0 | 0.012364115  |
| cov3_4_8_10_11 | 23.6963 | -384.175 | 0.3961701 | 0 | 0            | 0 | 0            |
| cov1_2_6_7_10  | 23.7099 | -384.181 | 0.397008  | 0 | -0.16377036  | 0 | 0.013156244  |
| cov1_2_6_9_10  | 23.7139 | -384.183 | 0.3968905 | 0 | -0.16498379  | 0 | 0.013515704  |
| cov1_6_9_10_11 | 23.7145 | -384.184 | 0.3972231 | 0 | -0.16111697  | 0 | 0            |
| cov1_6_7_10_11 | 23.7158 | -384.184 | 0.3972375 | 0 | -0.15990834  | 0 | 0            |
| cov1_6_8_10_11 | 23.7173 | -384.185 | 0.3970779 | 0 | -0.16154117  | 0 | 0            |
| cov1_2_6_8_10  | 23.7197 | -384.186 | 0.3968181 | 0 | -0.16440228  | 0 | 0.013281028  |
| cov3_6_7_8_9   | 23.7277 | -384.19  | 0.3991554 | 0 | 0            | 0 | 0            |
| cov1_6_7_9_10  | 23.7353 | -384.194 | 0.3971367 | 0 | -0.15344424  | 0 | 0            |
| cov1_4_8_10_11 | 23.7457 | -384.199 | 0.3948714 | 0 | -0.070410853 | 0 | 0            |
| cov1_6_8_9_10  | 23.7457 | -384.199 | 0.3969148 | 0 | -0.15396704  | 0 | 0            |
| cov1_4_9_10_11 | 23.7564 | -384.205 | 0.3952013 | 0 | -0.069729404 | 0 | 0            |
| cov1_4_7_10_11 | 23.7597 | -384.206 | 0.3950821 | 0 | -0.069452335 | 0 | 0            |
| cov3_4_6_8_10  | 23.7775 | -384.215 | 0.3967834 | 0 | 0            | 0 | 0            |
| cov1_4_8_9_10  | 23.8055 | -384.229 | 0.3946665 | 0 | -0.058081105 | 0 | 0            |
| cov1_4_7_9_10  | 23.8059 | -384.229 | 0.3949117 | 0 | -0.058566737 | 0 | 0            |
| cov3_4_7_10_11 | 23.8413 | -384.247 | 0.3960635 | 0 | 0            | 0 | 0            |
| cov3_7_8_10_11 | 23.8456 | -384.249 | 0.3985773 | 0 | 0            | 0 | 0            |
| cov2_3_4_8_10  | 23.8934 | -384.273 | 0.3968199 | 0 | 0            | 0 | -0.019465707 |
| cov1_2_6_9_11  | 23.8997 | -384.276 | 0.3969958 | 0 | -0.16885972  | 0 | 0.010818955  |
| cov1_6_7_9_11  | 23.9167 | -384.285 | 0.3971389 | 0 | -0.15949024  | 0 | 0            |

|                |         |          |           |   |              |   |              |
|----------------|---------|----------|-----------|---|--------------|---|--------------|
| cov1_6_8_9_11  | 23.9189 | -384.286 | 0.3969794 | 0 | -0.16112302  | 0 | 0            |
| cov1_2_6_7_9   | 23.9215 | -384.287 | 0.3969113 | 0 | -0.16158648  | 0 | 0.011688205  |
| cov1_2_6_8_9   | 23.933  | -384.293 | 0.3967227 | 0 | -0.16221684  | 0 | 0.011806329  |
| cov3_4_6_7_10  | 23.9442 | -384.298 | 0.3966122 | 0 | 0            | 0 | 0            |
| cov3_4_8_9_10  | 23.9467 | -384.3   | 0.3955302 | 0 | 0            | 0 | 0            |
| cov1_4_8_9_11  | 23.9625 | -384.308 | 0.3948222 | 0 | -0.071374675 | 0 | 0            |
| cov1_4_7_9_11  | 23.9751 | -384.314 | 0.3950342 | 0 | -0.0704246   | 0 | 0            |
| cov3_4_8_9_11  | 24.0267 | -384.34  | 0.3957729 | 0 | 0            | 0 | 0            |
| cov2_3_4_7_10  | 24.0551 | -384.354 | 0.3965637 | 0 | 0            | 0 | -0.017202204 |
| cov3_4_6_10_11 | 24.0569 | -384.355 | 0.395775  | 0 | 0            | 0 | 0            |
| cov2_3_4_10_11 | 24.06   | -384.356 | 0.3952374 | 0 | 0            | 0 | 0.005706835  |
| cov3_4_9_10_11 | 24.0645 | -384.359 | 0.3955608 | 0 | 0            | 0 | 0            |
| cov3_4_6_8_9   | 24.0907 | -384.372 | 0.3963784 | 0 | 0            | 0 | 0            |
| cov3_4_7_9_10  | 24.0962 | -384.374 | 0.3954114 | 0 | 0            | 0 | 0            |
| cov1_2_9_10_11 | 24.1522 | -384.402 | 0.3969962 | 0 | -0.11499842  | 0 | 0.0139727    |
| cov1_2_7_10_11 | 24.156  | -384.404 | 0.3970047 | 0 | -0.11316766  | 0 | 0.013710557  |
| cov3_4_7_9_11  | 24.1586 | -384.406 | 0.3956738 | 0 | 0            | 0 | 0            |
| cov1_2_8_10_11 | 24.1594 | -384.406 | 0.3968283 | 0 | -0.11478675  | 0 | 0.013693954  |
| cov3_7_8_9_11  | 24.1639 | -384.408 | 0.3981716 | 0 | 0            | 0 | 0            |
| cov2_3_8_10_11 | 24.1734 | -384.413 | 0.4004994 | 0 | 0            | 0 | -0.052776839 |
| cov2_3_6_8_10  | 24.1793 | -384.416 | 0.4009508 | 0 | 0            | 0 | -0.047185685 |
| cov1_7_9_10_11 | 24.1817 | -384.417 | 0.3971881 | 0 | -0.10272688  | 0 | 0            |
| cov1_8_9_10_11 | 24.1851 | -384.419 | 0.3970106 | 0 | -0.10435526  | 0 | 0            |
| cov2_3_4_8_9   | 24.1866 | -384.42  | 0.3964743 | 0 | 0            | 0 | -0.020301844 |
| cov1_2_7_9_10  | 24.189  | -384.421 | 0.3968923 | 0 | -0.10444315  | 0 | 0.015147832  |
| cov1_2_8_9_10  | 24.205  | -384.429 | 0.3966845 | 0 | -0.10474272  | 0 | 0.015293576  |
| cov2_3_4_6_10  | 24.2316 | -384.442 | 0.3956886 | 0 | 0            | 0 | 0.001931662  |
| cov3_4_6_9_10  | 24.232  | -384.442 | 0.3957695 | 0 | 0            | 0 | 0            |
| cov3_4_6_7_9   | 24.2433 | -384.448 | 0.3962059 | 0 | 0            | 0 | 0            |
| cov2_6_7_8_10  | 24.2799 | -384.466 | 0.3962801 | 0 | 0            | 0 | -0.038796331 |
| cov2_3_4_9_10  | 24.3281 | -384.49  | 0.3952899 | 0 | 0            | 0 | -0.007990822 |
| cov3_4_6_9_11  | 24.3299 | -384.491 | 0.3954738 | 0 | 0            | 0 | 0            |
| cov2_3_4_7_9   | 24.3362 | -384.494 | 0.3962163 | 0 | 0            | 0 | -0.018003172 |
| cov2_3_4_9_11  | 24.3376 | -384.495 | 0.395062  | 0 | 0            | 0 | 0.002934707  |
| cov1_2_7_9_11  | 24.3546 | -384.504 | 0.3969504 | 0 | -0.11223606  | 0 | 0.012236431  |
| cov2_3_7_10_11 | 24.3569 | -384.505 | 0.4004052 | 0 | 0            | 0 | -0.05175201  |
| cov1_2_8_9_11  | 24.3589 | -384.506 | 0.3967819 | 0 | -0.11383723  | 0 | 0.01220601   |
| cov2_7_8_10_11 | 24.3674 | -384.51  | 0.3959625 | 0 | 0            | 0 | -0.048237216 |
| cov2_4_6_10_11 | 24.3775 | -384.515 | 0.3922337 | 0 | 0            | 0 | 0.021556355  |
| cov2_4_7_10_11 | 24.3833 | -384.518 | 0.3922665 | 0 | 0            | 0 | 0.018980507  |
| cov2_4_8_10_11 | 24.3872 | -384.52  | 0.3920341 | 0 | 0            | 0 | 0.019193215  |
| cov2_4_9_10_11 | 24.3879 | -384.52  | 0.3920896 | 0 | 0            | 0 | 0.019147944  |
| cov2_3_6_7_10  | 24.388  | -384.52  | 0.4008775 | 0 | 0            | 0 | -0.047094154 |
| cov4_6_7_10_11 | 24.4363 | -384.545 | 0.3930996 | 0 | 0            | 0 | 0            |
| cov4_7_9_10_11 | 24.4371 | -384.545 | 0.3930283 | 0 | 0            | 0 | 0            |
| cov4_6_8_10_11 | 24.441  | -384.547 | 0.3928849 | 0 | 0            | 0 | 0            |
| cov4_6_9_10_11 | 24.4417 | -384.547 | 0.3929317 | 0 | 0            | 0 | 0            |

|                |         |          |           |   |             |   |              |
|----------------|---------|----------|-----------|---|-------------|---|--------------|
| cov4_8_9_10_11 | 24.4421 | -384.547 | 0.3928    | 0 | 0           | 0 | 0            |
| cov2_6_7_8_9   | 24.4423 | -384.548 | 0.3960963 | 0 | 0           | 0 | -0.03946448  |
| cov3_6_8_10_11 | 24.4469 | -384.55  | 0.3999221 | 0 | 0           | 0 | 0            |
| cov6_7_8_10_11 | 24.4544 | -384.554 | 0.3956235 | 0 | 0           | 0 | 0            |
| cov2_3_8_9_10  | 24.4554 | -384.554 | 0.4011438 | 0 | 0           | 0 | -0.072105836 |
| cov2_4_6_8_10  | 24.4653 | -384.559 | 0.3925108 | 0 | 0           | 0 | 0.016244457  |
| cov2_3_6_8_9   | 24.4673 | -384.56  | 0.4005568 | 0 | 0           | 0 | -0.047843308 |
| cov2_3_8_9_11  | 24.4741 | -384.563 | 0.4001262 | 0 | 0           | 0 | -0.053632217 |
| cov2_4_6_9_10  | 24.4784 | -384.566 | 0.3927871 | 0 | 0           | 0 | 0.015239497  |
| cov2_4_6_7_10  | 24.4786 | -384.566 | 0.3927711 | 0 | 0           | 0 | 0.015381451  |
| cov2_3_4_6_9   | 24.4813 | -384.567 | 0.3954699 | 0 | 0           | 0 | -0.000242032 |
| cov4_6_8_9_10  | 24.503  | -384.578 | 0.3930142 | 0 | 0           | 0 | 0            |
| cov4_6_7_9_10  | 24.5124 | -384.583 | 0.3932462 | 0 | 0           | 0 | 0            |
| cov2_4_8_9_10  | 24.5297 | -384.591 | 0.3923087 | 0 | 0           | 0 | 0.007410946  |
| cov2_7_8_9_11  | 24.5337 | -384.593 | 0.3957737 | 0 | 0           | 0 | -0.048949461 |
| cov2_4_7_9_10  | 24.5447 | -384.599 | 0.3925602 | 0 | 0           | 0 | 0.0064481    |
| cov2_4_6_9_11  | 24.6249 | -384.639 | 0.3922001 | 0 | 0           | 0 | 0.018273658  |
| cov2_7_8_9_10  | 24.6265 | -384.64  | 0.3964761 | 0 | 0           | 0 | -0.066783702 |
| cov2_4_7_9_11  | 24.629  | -384.641 | 0.3922458 | 0 | 0           | 0 | 0.015753598  |
| cov3_6_7_10_11 | 24.6304 | -384.642 | 0.3998352 | 0 | 0           | 0 | 0            |
| cov2_4_8_9_11  | 24.6344 | -384.644 | 0.3920126 | 0 | 0           | 0 | 0.015958099  |
| cov6_7_8_9_10  | 24.6433 | -384.648 | 0.3959603 | 0 | 0           | 0 | 0            |
| cov6_7_8_9_11  | 24.6445 | -384.649 | 0.3954808 | 0 | 0           | 0 | 0            |
| cov2_3_7_9_11  | 24.6457 | -384.649 | 0.4000329 | 0 | 0           | 0 | -0.05258325  |
| cov2_3_6_10_11 | 24.656  | -384.654 | 0.3997312 | 0 | 0           | 0 | -0.036973339 |
| cov2_3_7_9_10  | 24.6569 | -384.655 | 0.4010622 | 0 | 0           | 0 | -0.071702538 |
| cov2_3_6_7_9   | 24.6625 | -384.658 | 0.4004833 | 0 | 0           | 0 | -0.047716025 |
| cov4_6_7_9_11  | 24.6649 | -384.659 | 0.3929647 | 0 | 0           | 0 | 0            |
| cov4_6_8_9_11  | 24.6708 | -384.662 | 0.3927491 | 0 | 0           | 0 | 0            |
| cov2_4_6_8_9   | 24.6984 | -384.676 | 0.3924428 | 0 | 0           | 0 | 0.013483994  |
| cov2_4_6_7_9   | 24.7088 | -384.681 | 0.3927013 | 0 | 0           | 0 | 0.012642008  |
| cov3_6_8_9_10  | 24.7154 | -384.684 | 0.400388  | 0 | 0           | 0 | 0            |
| cov2_3_9_10_11 | 24.7296 | -384.691 | 0.3997205 | 0 | 0           | 0 | -0.046693404 |
| cov1_3_5_7_8   | 24.7405 | -384.697 | 0.4052295 | 0 | -0.16219575 | 0 | 0            |
| cov1_3_6_7_8   | 24.7442 | -384.698 | 0.4044228 | 0 | -0.15727728 | 0 | 0            |
| cov3_6_8_9_11  | 24.7759 | -384.714 | 0.399588  | 0 | 0           | 0 | 0            |
| cov1_3_7_8_11  | 24.8194 | -384.736 | 0.4044849 | 0 | -0.13653565 | 0 | 0            |
| cov1_2_3_7_8   | 24.8657 | -384.759 | 0.4042136 | 0 | -0.13089168 | 0 | 0.007500394  |
| cov2_3_6_9_10  | 24.8664 | -384.76  | 0.4001615 | 0 | 0           | 0 | -0.04478958  |
| cov1_3_4_7_8   | 24.8747 | -384.764 | 0.4043471 | 0 | -0.12602711 | 0 | 0            |
| cov2_3_6_9_11  | 24.8973 | -384.775 | 0.3994514 | 0 | 0           | 0 | -0.038257784 |
| cov3_6_7_9_10  | 24.9217 | -384.787 | 0.4003094 | 0 | 0           | 0 | 0            |
| cov3_6_7_9_11  | 24.9457 | -384.799 | 0.3995009 | 0 | 0           | 0 | 0            |
| cov3_6_9_10_11 | 24.9628 | -384.808 | 0.3993207 | 0 | 0           | 0 | 0            |
| cov1_4_6_7_8   | 25.028  | -384.84  | 0.401234  | 0 | -0.1425118  | 0 | 0            |
| cov1_6_7_8_11  | 25.0384 | -384.846 | 0.4019175 | 0 | -0.16124303 | 0 | 0            |
| cov3_8_9_10_11 | 25.0385 | -384.846 | 0.399343  | 0 | 0           | 0 | 0            |



|                |         |          |           |   |             |   |              |
|----------------|---------|----------|-----------|---|-------------|---|--------------|
| cov1_2_6_7_8   | 25.0725 | -384.863 | 0.4017059 | 0 | -0.15854991 | 0 | 0.00802148   |
| cov1_5_6_7_8   | 25.0739 | -384.863 | 0.4017762 | 0 | -0.14484782 | 0 | 0            |
| cov7_8_9_10_11 | 25.0903 | -384.872 | 0.3952083 | 0 | 0           | 0 | 0            |
| cov1_2_4_7_8   | 25.0988 | -384.876 | 0.4007643 | 0 | -0.12212018 | 0 | 0.023831087  |
| cov1_4_7_8_11  | 25.1112 | -384.882 | 0.4012951 | 0 | -0.12114872 | 0 | 0            |
| cov1_2_7_8_11  | 25.1514 | -384.902 | 0.4017109 | 0 | -0.13713535 | 0 | 0.007780986  |
| cov1_5_7_8_11  | 25.1518 | -384.902 | 0.401799  | 0 | -0.12360467 | 0 | 0            |
| cov1_4_5_7_8   | 25.1687 | -384.911 | 0.4008622 | 0 | -0.11211735 | 0 | 0            |
| cov3_7_9_10_11 | 25.1881 | -384.92  | 0.399271  | 0 | 0           | 0 | 0            |
| cov1_2_5_7_8   | 25.1954 | -384.924 | 0.4015586 | 0 | -0.11872077 | 0 | 0.009369646  |
| cov1_3_5_6_8   | 25.5757 | -385.114 | 0.4064411 | 0 | -0.2135016  | 0 | 0            |
| cov2_6_7_10_11 | 25.597  | -385.125 | 0.3967026 | 0 | 0           | 0 | -0.037294136 |
| cov2_6_8_10_11 | 25.6395 | -385.146 | 0.3965327 | 0 | 0           | 0 | -0.037900124 |
| cov2_6_9_10_11 | 25.6629 | -385.158 | 0.3962687 | 0 | 0           | 0 | -0.03868128  |
| cov2_6_7_9_10  | 25.6951 | -385.174 | 0.3970275 | 0 | 0           | 0 | -0.042891037 |
| cov2_7_9_10_11 | 25.7052 | -385.179 | 0.3966488 | 0 | 0           | 0 | -0.048867498 |
| cov1_3_5_6_7   | 25.7086 | -385.181 | 0.4060982 | 0 | -0.20544322 | 0 | 0            |
| cov1_3_6_8_11  | 25.7143 | -385.184 | 0.4055302 | 0 | -0.17870928 | 0 | 0            |
| cov2_6_8_9_10  | 25.7221 | -385.187 | 0.3968267 | 0 | 0           | 0 | -0.043015245 |
| cov1_3_5_8_11  | 25.7245 | -385.189 | 0.4065294 | 0 | -0.18525362 | 0 | 0            |
| cov1_3_4_5_8   | 25.7401 | -385.196 | 0.4054459 | 0 | -0.1728549  | 0 | 0            |
| cov2_8_9_10_11 | 25.7543 | -385.204 | 0.3964846 | 0 | 0           | 0 | -0.049818699 |
| cov1_2_3_6_8   | 25.7616 | -385.207 | 0.4052641 | 0 | -0.17383888 | 0 | 0.00634722   |
| cov2_6_7_9_11  | 25.7664 | -385.21  | 0.3965504 | 0 | 0           | 0 | -0.038331872 |
| cov1_3_4_6_8   | 25.7678 | -385.21  | 0.4053934 | 0 | -0.1701049  | 0 | 0            |
| cov1_2_3_5_8   | 25.7968 | -385.225 | 0.4061927 | 0 | -0.17487519 | 0 | 0.005172733  |
| cov1_3_6_7_11  | 25.7975 | -385.225 | 0.4053316 | 0 | -0.17693087 | 0 | 0            |
| cov2_6_8_9_11  | 25.8091 | -385.231 | 0.3963817 | 0 | 0           | 0 | -0.038940895 |
| cov1_2_3_6_7   | 25.8339 | -385.243 | 0.4050909 | 0 | -0.17312118 | 0 | 0.006464616  |
| cov1_3_4_5_6   | 25.8371 | -385.245 | 0.4041996 | 0 | -0.17947954 | 0 | 0            |
| cov1_3_4_6_7   | 25.8412 | -385.247 | 0.4051065 | 0 | -0.16798329 | 0 | 0            |
| cov1_3_5_6_11  | 25.8551 | -385.254 | 0.404983  | 0 | -0.18323845 | 0 | 0            |
| cov1_2_3_5_6   | 25.8676 | -385.26  | 0.4048951 | 0 | -0.18336686 | 0 | 0.00600371   |
| cov1_2_3_6_11  | 25.8725 | -385.263 | 0.4047696 | 0 | -0.17608364 | 0 | 0.005975464  |
| cov1_3_4_6_11  | 25.8747 | -385.264 | 0.4045423 | 0 | -0.16873892 | 0 | 0            |
| cov1_3_5_7_11  | 25.8762 | -385.264 | 0.4061389 | 0 | -0.17500641 | 0 | 0            |
| cov1_2_3_4_6   | 25.8791 | -385.266 | 0.4040904 | 0 | -0.16906617 | 0 | 0.013125577  |
| cov1_3_4_5_7   | 25.8891 | -385.271 | 0.4051468 | 0 | -0.1636494  | 0 | 0            |
| cov6_7_9_10_11 | 25.9089 | -385.281 | 0.396335  | 0 | 0           | 0 | 0            |
| cov1_2_3_8_11  | 25.9136 | -385.283 | 0.4053311 | 0 | -0.14484101 | 0 | 0.006220782  |
| cov1_3_4_8_11  | 25.9181 | -385.285 | 0.4055436 | 0 | -0.1422741  | 0 | 0            |
| cov1_2_3_5_7   | 25.9345 | -385.294 | 0.405824  | 0 | -0.16623036 | 0 | 0.00576633   |
| cov6_8_9_10_11 | 25.9619 | -385.307 | 0.3961531 | 0 | 0           | 0 | 0            |
| cov1_2_3_4_8   | 25.9855 | -385.319 | 0.4050003 | 0 | -0.13229538 | 0 | 0.008093598  |
| cov1_2_3_4_5   | 25.9996 | -385.326 | 0.4031768 | 0 | -0.15718086 | 0 | 0.027310344  |
| cov1_2_3_7_11  | 26.0015 | -385.327 | 0.4051186 | 0 | -0.14268312 | 0 | 0.006490269  |
| cov1_3_4_7_11  | 26.0084 | -385.331 | 0.4052216 | 0 | -0.13847566 | 0 | 0            |

|               |         |          |           |   |             |   |              |
|---------------|---------|----------|-----------|---|-------------|---|--------------|
| cov3_7_8_9_10 | 26.0134 | -385.333 | 0.3988106 | 0 | 0           | 0 | 0            |
| cov1_2_4_5_6  | 26.0146 | -385.334 | 0.400279  | 0 | -0.19133552 | 0 | 0.037506431  |
| cov1_2_4_6_11 | 26.033  | -385.343 | 0.4015549 | 0 | -0.17495086 | 0 | 0.023175507  |
| cov1_3_4_5_11 | 26.0411 | -385.347 | 0.4041919 | 0 | -0.14307784 | 0 | 0            |
| cov1_2_3_4_7  | 26.0588 | -385.356 | 0.404627  | 0 | -0.13058465 | 0 | 0.010154933  |
| cov1_2_3_5_11 | 26.0607 | -385.357 | 0.4047595 | 0 | -0.14835429 | 0 | 0.006523395  |
| cov1_2_4_6_7  | 26.0608 | -385.357 | 0.401553  | 0 | -0.16534847 | 0 | 0.023916945  |
| cov1_2_3_4_11 | 26.0691 | -385.361 | 0.4040469 | 0 | -0.13592498 | 0 | 0.012966186  |
| cov1_2_4_6_8  | 26.0832 | -385.368 | 0.4013316 | 0 | -0.16592166 | 0 | 0.024576869  |
| cov1_4_6_7_11 | 26.0871 | -385.37  | 0.4020455 | 0 | -0.16179095 | 0 | 0            |
| cov1_4_5_6_11 | 26.0913 | -385.372 | 0.4015582 | 0 | -0.16963026 | 0 | 0            |
| cov1_4_6_8_11 | 26.1014 | -385.377 | 0.4018748 | 0 | -0.16310272 | 0 | 0            |
| cov1_4_5_6_7  | 26.129  | -385.391 | 0.4015916 | 0 | -0.15711663 | 0 | 0            |
| cov1_5_6_7_11 | 26.1392 | -385.396 | 0.4026302 | 0 | -0.16394164 | 0 | 0            |
| cov1_2_6_7_11 | 26.1428 | -385.398 | 0.4025444 | 0 | -0.17730499 | 0 | 0.0069423    |
| cov1_4_5_6_8  | 26.1526 | -385.403 | 0.4013408 | 0 | -0.15839929 | 0 | 0            |
| cov1_2_5_6_11 | 26.1558 | -385.404 | 0.4023515 | 0 | -0.17296155 | 0 | 0.007153907  |
| cov1_5_6_8_11 | 26.1602 | -385.406 | 0.4024703 | 0 | -0.16616719 | 0 | 0            |
| cov1_2_6_8_11 | 26.1625 | -385.408 | 0.4023884 | 0 | -0.17902292 | 0 | 0.006902109  |
| cov1_2_5_6_7  | 26.1729 | -385.413 | 0.4024184 | 0 | -0.16096808 | 0 | 0.008359695  |
| cov1_2_4_5_11 | 26.2033 | -385.428 | 0.4005677 | 0 | -0.15523019 | 0 | 0.034669738  |
| cov1_2_5_6_8  | 26.2058 | -385.429 | 0.4022334 | 0 | -0.16214473 | 0 | 0.008435544  |
| cov1_2_4_7_11 | 26.2454 | -385.449 | 0.4015576 | 0 | -0.13353032 | 0 | 0.023302056  |
| cov1_2_4_5_7  | 26.257  | -385.455 | 0.4004623 | 0 | -0.14202401 | 0 | 0.035362478  |
| cov1_2_4_8_11 | 26.2581 | -385.455 | 0.4013678 | 0 | -0.13502951 | 0 | 0.023810936  |
| cov1_2_4_5_8  | 26.2723 | -385.463 | 0.4001484 | 0 | -0.14453875 | 0 | 0.037271573  |
| cov2_5_6_7_8  | 26.2951 | -385.474 | 0.4025185 | 0 | 0           | 0 | -0.028059859 |
| cov1_4_5_7_11 | 26.3119 | -385.482 | 0.4016857 | 0 | -0.12483314 | 0 | 0            |
| cov1_4_5_8_11 | 26.3251 | -385.489 | 0.401448  | 0 | -0.12716561 | 0 | 0            |
| cov1_2_5_7_11 | 26.3456 | -385.499 | 0.4023903 | 0 | -0.12981068 | 0 | 0.008411615  |
| cov1_2_5_8_11 | 26.3682 | -385.51  | 0.4022181 | 0 | -0.13195897 | 0 | 0.008356     |
| cov5_6_7_8_11 | 26.424  | -385.538 | 0.4024536 | 0 | 0           | 0 | 0            |
| cov4_5_6_7_8  | 26.45   | -385.551 | 0.4023262 | 0 | 0           | 0 | 0            |
| cov2_5_7_8_11 | 26.4508 | -385.552 | 0.4027267 | 0 | 0           | 0 | -0.036922427 |
| cov2_4_5_7_8  | 26.4515 | -385.552 | 0.4039577 | 0 | 0           | 0 | -0.052355161 |
| cov3_5_6_7_8  | 26.4636 | -385.558 | 0.402577  | 0 | 0           | 0 | 0            |
| cov2_3_5_7_8  | 26.5162 | -385.584 | 0.4026797 | 0 | 0           | 0 | -0.04082161  |
| cov2_3_6_7_8  | 26.6657 | -385.659 | 0.4044202 | 0 | 0           | 0 | -0.048524143 |
| cov2_4_6_7_8  | 26.7074 | -385.68  | 0.4010809 | 0 | 0           | 0 | -0.02403588  |
| cov4_6_7_8_11 | 26.7107 | -385.682 | 0.4005475 | 0 | 0           | 0 | 0            |
| cov3_5_7_8_11 | 26.721  | -385.687 | 0.4019028 | 0 | 0           | 0 | 0            |
| cov4_5_7_8_11 | 26.7611 | -385.707 | 0.4027065 | 0 | 0           | 0 | 0            |
| cov3_4_6_7_8  | 26.7674 | -385.71  | 0.4017855 | 0 | 0           | 0 | 0            |
| cov2_6_7_8_11 | 26.8603 | -385.757 | 0.4017839 | 0 | 0           | 0 | -0.04186056  |
| cov3_4_5_7_8  | 26.8671 | -385.76  | 0.4014553 | 0 | 0           | 0 | 0            |
| cov3_6_7_8_11 | 27.0395 | -385.846 | 0.4038701 | 0 | 0           | 0 | 0            |
| cov2_4_7_8_11 | 27.1985 | -385.926 | 0.401003  | 0 | 0           | 0 | -0.043122114 |

|                  |         |          |           |   |              |   |              |
|------------------|---------|----------|-----------|---|--------------|---|--------------|
| cov2_3_7_8_11    | 27.2957 | -385.974 | 0.404352  | 0 | 0            | 0 | -0.075025356 |
| cov3_4_7_8_11    | 27.516  | -386.084 | 0.3999791 | 0 | 0            | 0 | 0            |
| cov2_4_5_6_7     | 27.5505 | -386.102 | 0.4037598 | 0 | 0            | 0 | -0.037261938 |
| cov2_5_6_7_11    | 27.5545 | -386.104 | 0.4030689 | 0 | 0            | 0 | -0.028515044 |
| cov2_3_4_7_8     | 27.5603 | -386.107 | 0.4028247 | 0 | 0            | 0 | -0.070507339 |
| cov2_3_4_5_6     | 27.5665 | -386.11  | 0.4048842 | 0 | 0            | 0 | -0.043456617 |
| cov2_3_5_6_7     | 27.568  | -386.11  | 0.4036163 | 0 | 0            | 0 | -0.031924528 |
| cov2_3_5_6_11    | 27.5789 | -386.116 | 0.4040155 | 0 | 0            | 0 | -0.03327122  |
| cov2_3_5_6_8     | 27.596  | -386.124 | 0.403999  | 0 | 0            | 0 | -0.034285797 |
| cov2_4_5_7_11    | 27.6109 | -386.132 | 0.4040308 | 0 | 0            | 0 | -0.044748888 |
| cov2_4_5_6_8     | 27.6115 | -386.132 | 0.4034933 | 0 | 0            | 0 | -0.036526136 |
| cov2_5_6_8_11    | 27.6156 | -386.134 | 0.4029097 | 0 | 0            | 0 | -0.029111171 |
| cov2_3_4_5_7     | 27.6509 | -386.152 | 0.4045417 | 0 | 0            | 0 | -0.051593176 |
| cov2_3_5_7_11    | 27.653  | -386.153 | 0.4032356 | 0 | 0            | 0 | -0.036149682 |
| cov2_4_5_6_11    | 27.6785 | -386.166 | 0.4026551 | 0 | 0            | 0 | -0.033574399 |
| cov2_4_5_8_11    | 27.6835 | -386.168 | 0.4038319 | 0 | 0            | 0 | -0.044956646 |
| cov2_3_4_5_11    | 27.6847 | -386.169 | 0.4050882 | 0 | 0            | 0 | -0.053999646 |
| cov2_3_4_5_8     | 27.7061 | -386.179 | 0.404943  | 0 | 0            | 0 | -0.05532599  |
| cov4_5_6_7_11    | 27.7068 | -386.18  | 0.4027737 | 0 | 0            | 0 | 0            |
| cov2_3_5_8_11    | 27.7137 | -386.183 | 0.403583  | 0 | 0            | 0 | -0.039389088 |
| cov3_5_6_7_11    | 27.7212 | -386.187 | 0.4030623 | 0 | 0            | 0 | 0            |
| cov3_4_5_6_7     | 27.7545 | -386.204 | 0.4027319 | 0 | 0            | 0 | 0            |
| cov4_5_6_8_11    | 27.7698 | -386.211 | 0.4025525 | 0 | 0            | 0 | 0            |
| cov3_4_5_6_11    | 27.7798 | -386.216 | 0.4032177 | 0 | 0            | 0 | 0            |
| cov3_5_6_8_11    | 27.7828 | -386.218 | 0.4034168 | 0 | 0            | 0 | 0            |
| cov3_4_5_6_8     | 27.8092 | -386.231 | 0.403034  | 0 | 0            | 0 | 0            |
| cov2_3_4_6_11    | 27.8924 | -386.273 | 0.4035562 | 0 | 0            | 0 | -0.032473481 |
| cov3_4_5_7_11    | 27.9059 | -386.279 | 0.4021133 | 0 | 0            | 0 | 0            |
| cov2_3_6_8_11    | 27.9212 | -386.287 | 0.4051458 | 0 | 0            | 0 | -0.048574525 |
| cov2_3_4_6_8     | 27.9348 | -386.294 | 0.4042429 | 0 | 0            | 0 | -0.039778986 |
| cov2_3_6_7_11    | 27.9592 | -386.306 | 0.4048948 | 0 | 0            | 0 | -0.04766818  |
| cov2_3_4_6_7     | 27.967  | -386.31  | 0.4038114 | 0 | 0            | 0 | -0.037088422 |
| cov2_4_6_7_11    | 27.9925 | -386.323 | 0.4014295 | 0 | 0            | 0 | -0.021975389 |
| cov3_4_5_8_11    | 28.0126 | -386.333 | 0.4023618 | 0 | 0            | 0 | 0            |
| cov3_4_6_7_11    | 28.0267 | -386.34  | 0.4022273 | 0 | 0            | 0 | 0            |
| cov3_4_6_8_11    | 28.0331 | -386.343 | 0.4025622 | 0 | 0            | 0 | 0            |
| cov2_4_6_8_11    | 28.0431 | -386.348 | 0.4012389 | 0 | 0            | 0 | -0.021904351 |
| cov1_3_6_7_8_10  | 28.1567 | -382.89  | 0.4003332 | 0 | -0.1511985   | 0 | 0            |
| cov2_3_4_7_11    | 28.3728 | -386.513 | 0.4030133 | 0 | 0            | 0 | -0.050695767 |
| cov2_3_4_8_11    | 28.3876 | -386.52  | 0.4034414 | 0 | 0            | 0 | -0.054322307 |
| cov1_3_5_7_8_10  | 28.4345 | -383.029 | 0.398588  | 0 | -0.055203652 | 0 | 0            |
| cov1_3_4_7_8_10  | 28.4972 | -383.06  | 0.3990192 | 0 | -0.082230205 | 0 | 0            |
| cov1_3_6_7_8_9   | 28.506  | -383.065 | 0.3999997 | 0 | -0.14944634  | 0 | 0            |
| cov1_3_7_8_10_11 | 28.5204 | -383.072 | 0.400285  | 0 | -0.10440453  | 0 | 0            |
| cov1_2_3_7_8_10  | 28.5236 | -383.074 | 0.3999685 | 0 | -0.10604682  | 0 | 0.012729404  |
| cov1_3_7_8_9_10  | 28.5381 | -383.081 | 0.4002197 | 0 | -0.096128023 | 0 | 0            |
| cov3_5_6_7_8_10  | 28.5411 | -383.082 | 0.3960353 | 0 | 0            | 0 | 0            |

|                  |         |          |           |   |              |   |             |
|------------------|---------|----------|-----------|---|--------------|---|-------------|
| cov1_5_6_7_8_10  | 28.5855 | -383.105 | 0.3946869 | 0 | -0.054451967 | 0 | 0           |
| cov3_5_7_8_9_10  | 28.626  | -383.125 | 0.3967748 | 0 | 0            | 0 | 0           |
| cov2_3_5_7_8_10  | 28.6289 | -383.126 | 0.3966682 | 0 | 0            | 0 | 0.001136673 |
| cov3_5_7_8_10_11 | 28.6289 | -383.126 | 0.3967185 | 0 | 0            | 0 | 0           |
| cov3_4_5_7_8_10  | 28.6292 | -383.126 | 0.3967138 | 0 | 0            | 0 | 0           |
| cov2_5_6_7_8_10  | 28.753  | -383.188 | 0.3940626 | 0 | 0            | 0 | 0.004264312 |
| cov5_6_7_8_10_11 | 28.7558 | -383.19  | 0.3940966 | 0 | 0            | 0 | 0           |
| cov5_6_7_8_9_10  | 28.7562 | -383.19  | 0.3941497 | 0 | 0            | 0 | 0           |
| cov4_5_6_7_8_10  | 28.7566 | -383.19  | 0.3940946 | 0 | 0            | 0 | 0           |
| cov1_3_5_7_8_9   | 28.7986 | -383.211 | 0.3984403 | 0 | -0.05911151  | 0 | 0           |
| cov1_3_4_7_8_9   | 28.8347 | -383.229 | 0.3987009 | 0 | -0.0813369   | 0 | 0           |
| cov1_3_7_8_9_11  | 28.8513 | -383.237 | 0.4000002 | 0 | -0.10449158  | 0 | 0           |
| cov1_2_3_7_8_9   | 28.8682 | -383.246 | 0.3996888 | 0 | -0.1038263   | 0 | 0.011015838 |
| cov1_5_6_7_8_9   | 28.9164 | -383.27  | 0.3946461 | 0 | -0.059023665 | 0 | 0           |
| cov2_4_5_7_8_10  | 28.9317 | -383.278 | 0.3936387 | 0 | 0            | 0 | 0.02105896  |
| cov1_2_5_7_8_10  | 28.9409 | -383.282 | 0.3944273 | 0 | -0.015516399 | 0 | 0.019603229 |
| cov3_5_6_7_8_9   | 28.9447 | -383.284 | 0.3957263 | 0 | 0            | 0 | 0           |
| cov2_5_7_8_10_11 | 28.95   | -383.287 | 0.3943486 | 0 | 0            | 0 | 0.012858724 |
| cov2_5_7_8_9_10  | 28.9547 | -383.289 | 0.394349  | 0 | 0            | 0 | 0.014629313 |
| cov1_3_5_6_8_10  | 28.9723 | -383.298 | 0.3997649 | 0 | -0.12681077  | 0 | 0           |
| cov1_5_7_8_10_11 | 28.9775 | -383.301 | 0.3947718 | 0 | -0.010000667 | 0 | 0           |
| cov5_7_8_9_10_11 | 28.9822 | -383.303 | 0.3946639 | 0 | 0            | 0 | 0           |
| cov4_5_7_8_10_11 | 28.9845 | -383.304 | 0.3945388 | 0 | 0            | 0 | 0           |
| cov1_3_4_6_8_10  | 29.0003 | -383.312 | 0.3998791 | 0 | -0.1486691   | 0 | 0           |
| cov4_5_7_8_9_10  | 29.0036 | -383.314 | 0.3945452 | 0 | 0            | 0 | 0           |
| cov1_5_7_8_9_10  | 29.0041 | -383.314 | 0.3946307 | 0 | -0.001091909 | 0 | 0           |
| cov1_4_5_7_8_10  | 29.0074 | -383.316 | 0.3944763 | 0 | -0.000832936 | 0 | 0           |
| cov3_4_5_7_8_9   | 29.019  | -383.321 | 0.3962975 | 0 | 0            | 0 | 0           |
| cov2_3_5_7_8_9   | 29.0193 | -383.321 | 0.3964343 | 0 | 0            | 0 | -0.00155672 |
| cov3_5_7_8_9_11  | 29.0197 | -383.322 | 0.3963822 | 0 | 0            | 0 | 0           |
| cov1_2_3_6_8_10  | 29.0497 | -383.337 | 0.4010195 | 0 | -0.17085663  | 0 | 0.011122138 |
| cov1_3_6_8_10_11 | 29.0504 | -383.337 | 0.4012828 | 0 | -0.16810136  | 0 | 0           |
| cov1_3_6_8_9_10  | 29.0604 | -383.342 | 0.4012263 | 0 | -0.16237043  | 0 | 0           |
| cov1_2_4_7_8_10  | 29.1147 | -383.369 | 0.3926096 | 0 | -0.085874085 | 0 | 0.058484247 |
| cov4_5_6_7_8_9   | 29.1164 | -383.37  | 0.393906  | 0 | 0            | 0 | 0           |
| cov5_6_7_8_9_11  | 29.1173 | -383.37  | 0.3939956 | 0 | 0            | 0 | 0           |
| cov2_5_6_7_8_9   | 29.1174 | -383.371 | 0.3939955 | 0 | 0            | 0 | 0.001218866 |
| cov1_4_6_7_8_10  | 29.1298 | -383.377 | 0.3941275 | 0 | -0.11189461  | 0 | 0           |
| cov1_3_5_6_7_10  | 29.1381 | -383.381 | 0.3994322 | 0 | -0.119347    | 0 | 0           |
| cov1_3_4_6_7_10  | 29.1989 | -383.411 | 0.399739  | 0 | -0.14762222  | 0 | 0           |
| cov1_2_3_6_7_10  | 29.2599 | -383.442 | 0.4009865 | 0 | -0.17094338  | 0 | 0.011145471 |
| cov1_3_6_7_10_11 | 29.2664 | -383.445 | 0.4012209 | 0 | -0.16730582  | 0 | 0           |
| cov1_3_6_7_9_10  | 29.2712 | -383.447 | 0.4011902 | 0 | -0.16243269  | 0 | 0           |
| cov1_2_5_7_8_9   | 29.2736 | -383.449 | 0.3944452 | 0 | -0.019438142 | 0 | 0.017351579 |
| cov2_4_5_7_8_9   | 29.2753 | -383.449 | 0.3936067 | 0 | 0            | 0 | 0.017409243 |
| cov1_5_7_8_9_11  | 29.2889 | -383.456 | 0.3947725 | 0 | -0.01636839  | 0 | 0           |
| cov2_5_7_8_9_11  | 29.291  | -383.457 | 0.3943091 | 0 | 0            | 0 | 0.009184922 |

|                  |         |          |           |   |              |              |
|------------------|---------|----------|-----------|---|--------------|--------------|
| cov4_5_7_8_9_11  | 29.3067 | -383.465 | 0.394354  | 0 | 0            | 0            |
| cov1_4_5_7_8_9   | 29.3232 | -383.473 | 0.394383  | 0 | -0.006593145 | 0            |
| cov1_3_5_6_8_9   | 29.3593 | -383.491 | 0.3995948 | 0 | -0.12976097  | 0            |
| cov1_3_4_6_8_9   | 29.362  | -383.493 | 0.3995303 | 0 | -0.14688032  | 0            |
| cov1_4_6_7_8_9   | 29.3622 | -383.493 | 0.3940372 | 0 | -0.11150885  | 0            |
| cov1_2_3_5_6_10  | 29.3653 | -383.494 | 0.3977448 | 0 | -0.098052721 | 0.015955316  |
| cov1_2_4_7_8_9   | 29.3879 | -383.506 | 0.3926707 | 0 | -0.084512173 | 0.054873191  |
| cov1_3_5_6_9_10  | 29.4056 | -383.515 | 0.3979758 | 0 | -0.087304455 | 0            |
| cov1_3_6_8_9_11  | 29.4063 | -383.515 | 0.4009759 | 0 | -0.16724503  | 0            |
| cov1_3_5_6_10_11 | 29.4091 | -383.516 | 0.3979085 | 0 | -0.087570251 | 0            |
| cov1_3_4_5_6_10  | 29.4095 | -383.517 | 0.3978558 | 0 | -0.086899217 | 0            |
| cov1_2_3_6_8_9   | 29.418  | -383.521 | 0.4007102 | 0 | -0.16771405  | 0.009333503  |
| cov1_2_3_4_8_10  | 29.4406 | -383.532 | 0.3984529 | 0 | -0.098685016 | 0.034538466  |
| cov1_4_7_8_10_11 | 29.4944 | -383.559 | 0.3943867 | 0 | -0.068275137 | 0            |
| cov1_3_5_8_10_11 | 29.5054 | -383.565 | 0.399976  | 0 | -0.076253328 | 0            |
| cov1_2_3_5_8_10  | 29.5097 | -383.567 | 0.3995003 | 0 | -0.075521379 | 0.015100252  |
| cov1_2_3_4_6_10  | 29.5136 | -383.569 | 0.3966358 | 0 | -0.1544587   | 0.045190578  |
| cov1_3_5_6_7_9   | 29.5166 | -383.57  | 0.3992528 | 0 | -0.12214093  | 0            |
| cov1_3_4_8_10_11 | 29.5288 | -383.576 | 0.4001498 | 0 | -0.095534557 | 0            |
| cov1_4_7_8_9_10  | 29.5347 | -383.579 | 0.3942266 | 0 | -0.058110382 | 0            |
| cov1_3_5_8_9_10  | 29.5366 | -383.58  | 0.3998674 | 0 | -0.066465586 | 0            |
| cov1_3_4_5_8_10  | 29.5442 | -383.584 | 0.399517  | 0 | -0.065988766 | 0            |
| cov1_3_4_6_7_9   | 29.5474 | -383.586 | 0.3993851 | 0 | -0.14578046  | 0            |
| cov1_2_3_8_10_11 | 29.5511 | -383.587 | 0.4009903 | 0 | -0.11679867  | 0.011827061  |
| cov3_4_7_8_10_11 | 29.5582 | -383.591 | 0.3953948 | 0 | 0            | 0            |
| cov1_3_8_9_10_11 | 29.5612 | -383.592 | 0.401253  | 0 | -0.10807732  | 0            |
| cov1_3_4_8_9_10  | 29.5633 | -383.593 | 0.4000679 | 0 | -0.085691903 | 0            |
| cov1_2_3_8_9_10  | 29.5748 | -383.599 | 0.4009012 | 0 | -0.10860573  | 0.01332936   |
| cov1_2_4_5_6_10  | 29.5748 | -383.599 | 0.3939327 | 0 | -0.099745353 | 0.038803813  |
| cov1_2_6_7_8_10  | 29.587  | -383.605 | 0.3963136 | 0 | -0.15298772  | 0.013167051  |
| cov1_6_7_8_10_11 | 29.5941 | -383.609 | 0.3965375 | 0 | -0.14896639  | 0            |
| cov3_4_6_7_8_10  | 29.6049 | -383.614 | 0.3961289 | 0 | 0            | 0            |
| cov1_3_6_7_9_11  | 29.61   | -383.617 | 0.4009122 | 0 | -0.16638836  | 0            |
| cov1_6_7_8_9_10  | 29.6127 | -383.618 | 0.3964435 | 0 | -0.14264657  | 0            |
| cov1_2_3_6_7_9   | 29.6149 | -383.619 | 0.4006747 | 0 | -0.16778181  | 0.009389683  |
| cov1_2_3_4_7_10  | 29.6354 | -383.63  | 0.3982219 | 0 | -0.097591116 | 0.036145466  |
| cov1_2_5_6_7_10  | 29.6626 | -383.643 | 0.3952742 | 0 | -0.077814456 | 0.018262185  |
| cov1_2_5_6_10_11 | 29.6627 | -383.643 | 0.395253  | 0 | -0.084233078 | 0.017654339  |
| cov1_2_5_6_9_10  | 29.6776 | -383.651 | 0.395059  | 0 | -0.079582404 | 0.018573974  |
| cov1_2_5_6_8_10  | 29.6786 | -383.651 | 0.3950895 | 0 | -0.078722521 | 0.0183712    |
| cov1_2_3_5_7_10  | 29.6823 | -383.653 | 0.3991291 | 0 | -0.067199069 | 0.015659091  |
| cov3_5_6_8_10_11 | 29.6826 | -383.653 | 0.3966848 | 0 | 0            | 0            |
| cov2_3_5_6_8_10  | 29.686  | -383.655 | 0.3969286 | 0 | 0            | -0.007500575 |
| cov1_3_5_7_10_11 | 29.6906 | -383.657 | 0.3995795 | 0 | -0.066313323 | 0            |
| cov3_5_6_8_9_10  | 29.6959 | -383.66  | 0.3967537 | 0 | 0            | 0            |
| cov3_4_5_6_8_10  | 29.6969 | -383.66  | 0.3966871 | 0 | 0            | 0            |
| cov1_5_6_7_10_11 | 29.707  | -383.665 | 0.3955284 | 0 | -0.069899941 | 0            |

|                  |         |          |           |   |              |   |              |
|------------------|---------|----------|-----------|---|--------------|---|--------------|
| cov1_4_5_6_10_11 | 29.7086 | -383.666 | 0.3951561 | 0 | -0.073160124 | 0 | 0            |
| cov1_4_7_8_9_11  | 29.7129 | -383.668 | 0.3943311 | 0 | -0.069216892 | 0 | 0            |
| cov1_3_5_7_9_10  | 29.7133 | -383.668 | 0.3994953 | 0 | -0.057703883 | 0 | 0            |
| cov1_5_6_9_10_11 | 29.7151 | -383.669 | 0.3954214 | 0 | -0.072279795 | 0 | 0            |
| cov1_4_5_6_7_10  | 29.7162 | -383.67  | 0.3951755 | 0 | -0.065471926 | 0 | 0            |
| cov1_5_6_8_10_11 | 29.7168 | -383.67  | 0.3953793 | 0 | -0.07192909  | 0 | 0            |
| cov1_5_6_7_9_10  | 29.7188 | -383.671 | 0.3954243 | 0 | -0.064704694 | 0 | 0            |
| cov1_3_4_5_7_10  | 29.7223 | -383.673 | 0.3992034 | 0 | -0.057017607 | 0 | 0            |
| cov1_2_3_5_6_9   | 29.7242 | -383.674 | 0.397671  | 0 | -0.10098085  | 0 | 0.013686969  |
| cov1_4_5_6_9_10  | 29.729  | -383.676 | 0.3949182 | 0 | -0.067169334 | 0 | 0            |
| cov1_4_5_6_8_10  | 29.73   | -383.677 | 0.3949392 | 0 | -0.06658429  | 0 | 0            |
| cov1_5_6_8_9_10  | 29.7355 | -383.68  | 0.39524   | 0 | -0.065536515 | 0 | 0            |
| cov1_3_4_7_10_11 | 29.7457 | -383.685 | 0.3999679 | 0 | -0.092719405 | 0 | 0            |
| cov1_3_4_6_9_10  | 29.7458 | -383.685 | 0.3985084 | 0 | -0.13493249  | 0 | 0            |
| cov1_3_4_6_10_11 | 29.7503 | -383.687 | 0.3983986 | 0 | -0.13418957  | 0 | 0            |
| cov1_3_5_6_9_11  | 29.7545 | -383.689 | 0.3978173 | 0 | -0.09287074  | 0 | 0            |
| cov1_3_4_5_6_9   | 29.7549 | -383.689 | 0.3976419 | 0 | -0.091554623 | 0 | 0            |
| cov3_5_6_7_10_11 | 29.7569 | -383.69  | 0.3964794 | 0 | 0            | 0 | 0            |
| cov2_3_5_6_7_10  | 29.7668 | -383.695 | 0.3966701 | 0 | 0            | 0 | -0.005660943 |
| cov1_3_4_7_9_10  | 29.7717 | -383.698 | 0.3999082 | 0 | -0.083930012 | 0 | 0            |
| cov3_5_6_7_9_10  | 29.7722 | -383.698 | 0.3965454 | 0 | 0            | 0 | 0            |
| cov3_4_5_6_7_10  | 29.773  | -383.698 | 0.3965231 | 0 | 0            | 0 | 0            |
| cov1_2_3_7_10_11 | 29.7773 | -383.7   | 0.4009164 | 0 | -0.11533623  | 0 | 0.011989153  |
| cov2_3_4_7_8_10  | 29.7795 | -383.702 | 0.3958819 | 0 | 0            | 0 | -0.017249121 |
| cov1_3_7_9_10_11 | 29.7884 | -383.706 | 0.4011761 | 0 | -0.10647958  | 0 | 0            |
| cov1_2_3_7_9_10  | 29.7929 | -383.708 | 0.4008531 | 0 | -0.10815072  | 0 | 0.013361071  |
| cov3_5_6_9_10_11 | 29.7964 | -383.71  | 0.3961891 | 0 | 0            | 0 | 0            |
| cov1_6_7_8_9_11  | 29.7966 | -383.71  | 0.3964357 | 0 | -0.1485484   | 0 | 0            |
| cov3_4_5_6_10_11 | 29.7968 | -383.71  | 0.3962306 | 0 | 0            | 0 | 0            |
| cov2_3_5_6_10_11 | 29.7973 | -383.71  | 0.3961753 | 0 | 0            | 0 | -0.001190231 |
| cov1_2_4_6_8_10  | 29.7996 | -383.712 | 0.3929517 | 0 | -0.15196081  | 0 | 0.060782249  |
| cov1_2_6_7_8_9   | 29.8003 | -383.712 | 0.3962138 | 0 | -0.15079242  | 0 | 0.011689446  |
| cov1_2_3_4_8_9   | 29.8099 | -383.717 | 0.3982692 | 0 | -0.096697953 | 0 | 0.031777705  |
| cov2_3_4_5_6_10  | 29.8111 | -383.717 | 0.3965368 | 0 | 0            | 0 | -0.005750619 |
| cov2_3_5_6_9_10  | 29.8142 | -383.719 | 0.396258  | 0 | 0            | 0 | -0.002576996 |
| cov3_4_5_6_9_10  | 29.8147 | -383.719 | 0.39629   | 0 | 0            | 0 | 0            |
| cov2_3_5_8_9_10  | 29.8168 | -383.72  | 0.3976405 | 0 | 0            | 0 | -0.001391554 |
| cov3_5_8_9_10_11 | 29.8169 | -383.72  | 0.3975981 | 0 | 0            | 0 | 0            |
| cov1_2_3_4_6_9   | 29.817  | -383.72  | 0.3965166 | 0 | -0.1522348   | 0 | 0.042085466  |
| cov3_4_5_8_9_10  | 29.817  | -383.72  | 0.3975502 | 0 | 0            | 0 | 0            |
| cov1_2_4_6_10_11 | 29.8191 | -383.721 | 0.3935455 | 0 | -0.15421719  | 0 | 0.058455326  |
| cov1_2_4_6_7_10  | 29.8202 | -383.722 | 0.3931979 | 0 | -0.1516812   | 0 | 0.059910695  |
| cov2_3_4_5_8_10  | 29.8204 | -383.722 | 0.3975404 | 0 | 0            | 0 | -0.001074758 |
| cov2_3_5_8_10_11 | 29.8204 | -383.722 | 0.3975699 | 0 | 0            | 0 | -0.001216461 |
| cov3_4_5_8_10_11 | 29.8204 | -383.722 | 0.397482  | 0 | 0            | 0 | 0            |
| cov3_4_7_8_9_10  | 29.8205 | -383.722 | 0.3947243 | 0 | 0            | 0 | 0            |
| cov1_2_4_6_9_10  | 29.8217 | -383.723 | 0.3934523 | 0 | -0.15177327  | 0 | 0.059348073  |

|                  |         |          |           |   |              |   |              |
|------------------|---------|----------|-----------|---|--------------|---|--------------|
| cov1_3_5_8_9_11  | 29.8665 | -383.745 | 0.3998611 | 0 | -0.081280682 | 0 | 0            |
| cov1_3_4_8_9_11  | 29.8692 | -383.746 | 0.3998576 | 0 | -0.095571291 | 0 | 0            |
| cov3_4_7_8_9_11  | 29.878  | -383.751 | 0.3949922 | 0 | 0            | 0 | 0            |
| cov1_2_7_8_10_11 | 29.887  | -383.755 | 0.3963021 | 0 | -0.11162938  | 0 | 0.013506659  |
| cov1_2_3_5_8_9   | 29.8898 | -383.757 | 0.3994109 | 0 | -0.078237651 | 0 | 0.012944473  |
| cov1_2_3_4_5_10  | 29.8962 | -383.76  | 0.3969048 | 0 | -0.0478863   | 0 | 0.028606713  |
| cov1_2_3_6_9_10  | 29.8978 | -383.761 | 0.4003505 | 0 | -0.16431315  | 0 | 0.011597472  |
| cov1_2_3_8_9_11  | 29.8986 | -383.761 | 0.4007389 | 0 | -0.11549657  | 0 | 0.009998642  |
| cov1_2_3_6_10_11 | 29.9052 | -383.764 | 0.4001908 | 0 | -0.16238573  | 0 | 0.011515961  |
| cov3_4_6_7_8_9   | 29.9086 | -383.766 | 0.395726  | 0 | 0            | 0 | 0            |
| cov1_3_4_5_8_9   | 29.9087 | -383.766 | 0.399311  | 0 | -0.07043081  | 0 | 0            |
| cov1_2_4_5_6_9   | 29.911  | -383.767 | 0.3938562 | 0 | -0.10377554  | 0 | 0.037477351  |
| cov1_7_8_9_10_11 | 29.9125 | -383.768 | 0.3964767 | 0 | -0.10132344  | 0 | 0            |
| cov1_2_7_8_9_10  | 29.9152 | -383.769 | 0.3961997 | 0 | -0.10354311  | 0 | 0.014844628  |
| cov1_2_3_5_9_10  | 29.9159 | -383.77  | 0.3978053 | 0 | -0.039859224 | 0 | 0.017729774  |
| cov1_2_3_5_10_11 | 29.9185 | -383.771 | 0.3977328 | 0 | -0.041812492 | 0 | 0.017078946  |
| cov1_3_6_9_10_11 | 29.9206 | -383.772 | 0.4003778 | 0 | -0.15381912  | 0 | 0            |
| cov2_3_5_7_9_10  | 29.9234 | -383.774 | 0.3974466 | 0 | 0            | 0 | 0.001054967  |
| cov3_5_7_9_10_11 | 29.9235 | -383.774 | 0.397492  | 0 | 0            | 0 | 0            |
| cov3_4_5_7_9_10  | 29.9236 | -383.774 | 0.3974875 | 0 | 0            | 0 | 0            |
| cov2_3_4_5_7_10  | 29.927  | -383.775 | 0.3973101 | 0 | 0            | 0 | 0.001689052  |
| cov2_3_5_7_10_11 | 29.927  | -383.775 | 0.3973746 | 0 | 0            | 0 | 0.001275555  |
| cov3_4_5_7_10_11 | 29.9274 | -383.776 | 0.3974139 | 0 | 0            | 0 | 0            |
| cov2_5_6_7_10_11 | 29.9567 | -383.79  | 0.3946191 | 0 | 0            | 0 | 0.003012728  |
| cov5_6_7_9_10_11 | 29.958  | -383.791 | 0.3946939 | 0 | 0            | 0 | 0            |
| cov4_5_6_7_10_11 | 29.9584 | -383.791 | 0.3946382 | 0 | 0            | 0 | 0            |
| cov2_4_5_6_7_10  | 29.9594 | -383.792 | 0.3945519 | 0 | 0            | 0 | 0.003655354  |
| cov2_5_6_7_9_10  | 29.9599 | -383.792 | 0.3947068 | 0 | 0            | 0 | 0.002195035  |
| cov4_5_6_7_9_10  | 29.9608 | -383.792 | 0.3947112 | 0 | 0            | 0 | 0            |
| cov1_3_5_9_10_11 | 29.962  | -383.793 | 0.3980399 | 0 | -0.030674071 | 0 | 0            |
| cov1_3_4_5_10_11 | 29.9685 | -383.796 | 0.3979843 | 0 | -0.029825259 | 0 | 0            |
| cov1_3_4_5_9_10  | 29.9698 | -383.797 | 0.3980522 | 0 | -0.026674321 | 0 | 0            |
| cov2_4_5_6_8_10  | 29.9808 | -383.802 | 0.3942696 | 0 | 0            | 0 | 0.00457475   |
| cov2_5_6_8_10_11 | 29.9823 | -383.803 | 0.3944484 | 0 | 0            | 0 | 0.002587784  |
| cov4_5_6_8_10_11 | 29.9829 | -383.803 | 0.3944086 | 0 | 0            | 0 | 0            |
| cov2_5_6_8_9_10  | 29.9832 | -383.803 | 0.3945102 | 0 | 0            | 0 | 0.002107968  |
| cov5_6_8_9_10_11 | 29.9832 | -383.803 | 0.3945153 | 0 | 0            | 0 | 0            |
| cov4_5_6_8_9_10  | 29.9834 | -383.804 | 0.3944605 | 0 | 0            | 0 | 0            |
| cov2_4_5_6_10_11 | 29.9841 | -383.804 | 0.3940087 | 0 | 0            | 0 | 0.005871316  |
| cov2_4_5_6_9_10  | 29.9846 | -383.804 | 0.3940982 | 0 | 0            | 0 | 0.00520853   |
| cov4_5_6_9_10_11 | 29.9883 | -383.806 | 0.3942475 | 0 | 0            | 0 | 0            |
| cov2_5_6_9_10_11 | 29.9892 | -383.806 | 0.3943137 | 0 | 0            | 0 | 0.002269696  |
| cov1_2_3_4_7_9   | 29.991  | -383.807 | 0.3980333 | 0 | -0.095635188 | 0 | 0.033452297  |
| cov1_2_5_6_9_11  | 30.0019 | -383.813 | 0.3952643 | 0 | -0.088214383 | 0 | 0.015208601  |
| cov1_2_5_6_7_9   | 30.0065 | -383.815 | 0.3952647 | 0 | -0.08082967  | 0 | 0.015947741  |
| cov2_3_6_7_8_10  | 30.0182 | -383.821 | 0.4000939 | 0 | 0            | 0 | -0.042995202 |
| cov2_3_4_5_9_10  | 30.0195 | -383.822 | 0.396804  | 0 | 0            | 0 | 0.007760267  |

|                  |         |          |           |   |              |   |              |
|------------------|---------|----------|-----------|---|--------------|---|--------------|
| cov2_3_5_9_10_11 | 30.0196 | -383.822 | 0.3969329 | 0 | 0            | 0 | 0.006987689  |
| cov1_3_4_6_9_11  | 30.0228 | -383.823 | 0.3981678 | 0 | -0.13438768  | 0 | 0            |
| cov2_3_4_5_10_11 | 30.0228 | -383.823 | 0.3966945 | 0 | 0            | 0 | 0.008503884  |
| cov1_2_5_6_8_9   | 30.0242 | -383.824 | 0.3950825 | 0 | -0.081752747 | 0 | 0.016051364  |
| cov1_4_5_6_9_11  | 30.0276 | -383.826 | 0.395061  | 0 | -0.078965582 | 0 | 0            |
| cov3_4_5_9_10_11 | 30.0285 | -383.826 | 0.3972582 | 0 | 0            | 0 | 0            |
| cov1_5_6_7_9_11  | 30.0319 | -383.828 | 0.3955125 | 0 | -0.07537279  | 0 | 0            |
| cov1_4_5_6_7_9   | 30.0414 | -383.833 | 0.39505   | 0 | -0.070455047 | 0 | 0            |
| cov1_5_6_8_9_11  | 30.0421 | -383.833 | 0.395364  | 0 | -0.077403105 | 0 | 0            |
| cov1_3_5_7_9_11  | 30.0438 | -383.834 | 0.3994579 | 0 | -0.07121793  | 0 | 0            |
| cov1_2_3_4_9_10  | 30.0533 | -383.838 | 0.3968985 | 0 | -0.092730943 | 0 | 0.044229465  |
| cov1_2_3_5_7_9   | 30.0538 | -383.839 | 0.3990312 | 0 | -0.069801203 | 0 | 0.013521032  |
| cov1_4_5_6_8_9   | 30.0556 | -383.84  | 0.3948115 | 0 | -0.071571469 | 0 | 0            |
| cov1_2_3_4_10_11 | 30.0613 | -383.842 | 0.3967893 | 0 | -0.093522731 | 0 | 0.043907772  |
| cov2_3_4_7_8_9   | 30.0624 | -383.843 | 0.3955256 | 0 | 0            | 0 | -0.018031156 |
| cov2_3_7_8_10_11 | 30.0638 | -383.844 | 0.3996709 | 0 | 0            | 0 | -0.051075974 |
| cov1_3_4_7_9_11  | 30.0729 | -383.848 | 0.3996731 | 0 | -0.092730692 | 0 | 0            |
| cov1_3_4_5_7_9   | 30.0792 | -383.851 | 0.3989904 | 0 | -0.061342356 | 0 | 0            |
| cov1_2_4_6_8_9   | 30.085  | -383.854 | 0.3929934 | 0 | -0.14976449  | 0 | 0.057061882  |
| cov1_2_7_8_9_11  | 30.089  | -383.856 | 0.3962391 | 0 | -0.11064941  | 0 | 0.012007138  |
| cov1_2_4_6_9_11  | 30.095  | -383.859 | 0.3935849 | 0 | -0.15298945  | 0 | 0.05472467   |
| cov2_3_5_6_8_9   | 30.0952 | -383.859 | 0.3966903 | 0 | 0            | 0 | -0.010028841 |
| cov2_4_7_8_10_11 | 30.0956 | -383.86  | 0.3916055 | 0 | 0            | 0 | 0.019035925  |
| cov1_2_4_6_7_9   | 30.1025 | -383.863 | 0.3932378 | 0 | -0.14948606  | 0 | 0.056209642  |
| cov3_5_6_8_9_11  | 30.1044 | -383.864 | 0.3963899 | 0 | 0            | 0 | 0            |
| cov1_2_3_7_9_11  | 30.1116 | -383.868 | 0.4006621 | 0 | -0.11405081  | 0 | 0.010197647  |
| cov3_4_5_6_8_9   | 30.1131 | -383.868 | 0.3962899 | 0 | 0            | 0 | 0            |
| cov4_6_7_8_10_11 | 30.1378 | -383.881 | 0.3925886 | 0 | 0            | 0 | 0            |
| cov1_2_4_5_10_11 | 30.1443 | -383.884 | 0.3942034 | 0 | -0.043339181 | 0 | 0.037065787  |
| cov4_7_8_9_10_11 | 30.1497 | -383.887 | 0.3923629 | 0 | 0            | 0 | 0            |
| cov2_4_6_7_8_10  | 30.1499 | -383.887 | 0.3921492 | 0 | 0            | 0 | 0.01796432   |
| cov2_3_5_6_7_9   | 30.1658 | -383.895 | 0.3964271 | 0 | 0            | 0 | -0.008147082 |
| cov3_5_6_7_9_11  | 30.1667 | -383.895 | 0.3961806 | 0 | 0            | 0 | 0            |
| cov1_2_4_5_7_10  | 30.1701 | -383.897 | 0.3940742 | 0 | -0.033927207 | 0 | 0.037594559  |
| cov1_2_4_5_9_10  | 30.1714 | -383.898 | 0.3939117 | 0 | -0.036834708 | 0 | 0.039445956  |
| cov1_2_4_5_8_10  | 30.1771 | -383.9   | 0.3937654 | 0 | -0.036369418 | 0 | 0.03955762   |
| cov3_4_5_6_7_9   | 30.178  | -383.901 | 0.3961233 | 0 | 0            | 0 | 0            |
| cov1_2_3_6_9_11  | 30.1782 | -383.901 | 0.3999745 | 0 | -0.16103987  | 0 | 0.009808861  |
| cov2_3_5_6_9_11  | 30.1878 | -383.906 | 0.3960239 | 0 | 0            | 0 | -0.004432516 |
| cov3_4_5_6_9_11  | 30.1916 | -383.908 | 0.3958951 | 0 | 0            | 0 | 0            |
| cov4_6_7_8_9_10  | 30.1963 | -383.91  | 0.3927142 | 0 | 0            | 0 | 0            |
| cov2_3_4_5_6_9   | 30.1968 | -383.91  | 0.3963053 | 0 | 0            | 0 | -0.008071075 |
| cov1_2_5_7_10_11 | 30.2137 | -383.919 | 0.3953409 | 0 | -0.024715571 | 0 | 0.018911294  |
| cov3_6_7_8_10_11 | 30.2182 | -383.921 | 0.3991409 | 0 | 0            | 0 | 0            |
| cov2_3_4_5_8_9   | 30.2193 | -383.921 | 0.3972673 | 0 | 0            | 0 | -0.003395863 |
| cov2_3_5_8_9_11  | 30.2194 | -383.922 | 0.3973452 | 0 | 0            | 0 | -0.004231452 |
| cov1_2_5_9_10_11 | 30.2209 | -383.922 | 0.3952441 | 0 | -0.02768365  | 0 | 0.019077369  |



|                  |         |          |           |   |              |   |              |
|------------------|---------|----------|-----------|---|--------------|---|--------------|
| cov3_4_5_8_9_11  | 30.2209 | -383.922 | 0.3970681 | 0 | 0            | 0 | 0            |
| cov1_4_6_8_10_11 | 30.224  | -383.924 | 0.394767  | 0 | -0.12980911  | 0 | 0            |
| cov1_2_5_8_10_11 | 30.2261 | -383.925 | 0.395174  | 0 | -0.02675251  | 0 | 0.018871247  |
| cov2_4_5_7_10_11 | 30.2288 | -383.926 | 0.3944198 | 0 | 0            | 0 | 0.019320767  |
| cov2_4_5_7_9_10  | 30.2305 | -383.927 | 0.3943841 | 0 | 0            | 0 | 0.021148379  |
| cov1_2_3_4_5_9   | 30.2342 | -383.929 | 0.3967869 | 0 | -0.052735757 | 0 | 0.027653235  |
| cov1_2_5_7_9_10  | 30.2365 | -383.93  | 0.3952196 | 0 | -0.017087318 | 0 | 0.020113785  |
| cov2_4_5_9_10_11 | 30.2399 | -383.932 | 0.3941805 | 0 | 0            | 0 | 0.019507055  |
| cov1_4_6_7_10_11 | 30.2402 | -383.932 | 0.394961  | 0 | -0.12881916  | 0 | 0            |
| cov1_4_6_9_10_11 | 30.2402 | -383.932 | 0.3950912 | 0 | -0.12855722  | 0 | 0            |
| cov2_4_5_8_10_11 | 30.2421 | -383.933 | 0.3941601 | 0 | 0            | 0 | 0.019534052  |
| cov2_4_5_8_9_10  | 30.2471 | -383.935 | 0.3940897 | 0 | 0            | 0 | 0.021948682  |
| cov2_5_7_9_10_11 | 30.2478 | -383.936 | 0.3951113 | 0 | 0            | 0 | 0.012735802  |
| cov1_4_6_8_9_10  | 30.2553 | -383.939 | 0.3945924 | 0 | -0.12221673  | 0 | 0            |
| cov1_2_3_5_9_11  | 30.2584 | -383.941 | 0.3977127 | 0 | -0.046647469 | 0 | 0.014769436  |
| cov1_2_5_8_9_10  | 30.2595 | -383.942 | 0.3950162 | 0 | -0.017702733 | 0 | 0.020239887  |
| cov1_4_6_7_9_10  | 30.2627 | -383.943 | 0.3948194 | 0 | -0.12231255  | 0 | 0            |
| cov2_4_7_8_9_10  | 30.2633 | -383.943 | 0.3919    | 0 | 0            | 0 | 0.006270466  |
| cov2_5_8_9_10_11 | 30.2668 | -383.945 | 0.3949191 | 0 | 0            | 0 | 0.012181492  |
| cov1_5_7_9_10_11 | 30.2718 | -383.948 | 0.3955684 | 0 | -0.01177043  | 0 | 0            |
| cov1_4_5_7_10_11 | 30.2744 | -383.949 | 0.3953897 | 0 | -0.011798664 | 0 | 0            |
| cov1_3_4_9_10_11 | 30.2762 | -383.95  | 0.3986732 | 0 | -0.076621759 | 0 | 0            |
| cov1_4_5_9_10_11 | 30.2807 | -383.952 | 0.3952552 | 0 | -0.014550825 | 0 | 0            |
| cov4_5_7_9_10_11 | 30.2815 | -383.953 | 0.395295  | 0 | 0            | 0 | 0            |
| cov1_5_8_9_10_11 | 30.2839 | -383.954 | 0.3954002 | 0 | -0.013831848 | 0 | 0            |
| cov1_4_5_8_10_11 | 30.2845 | -383.954 | 0.3951686 | 0 | -0.014149744 | 0 | 0            |
| cov1_3_4_5_9_11  | 30.2961 | -383.96  | 0.3978282 | 0 | -0.036247247 | 0 | 0            |
| cov4_5_8_9_10_11 | 30.2963 | -383.96  | 0.3950381 | 0 | 0            | 0 | 0            |
| cov2_3_6_7_8_9   | 30.2987 | -383.961 | 0.3996975 | 0 | 0            | 0 | -0.043630676 |
| cov1_4_5_7_9_10  | 30.3063 | -383.965 | 0.3952566 | 0 | -0.001941138 | 0 | 0            |
| cov2_3_4_5_7_9   | 30.3146 | -383.969 | 0.3970386 | 0 | 0            | 0 | -0.000595566 |
| cov3_4_5_7_9_11  | 30.3147 | -383.969 | 0.3970026 | 0 | 0            | 0 | 0            |
| cov2_3_5_7_9_11  | 30.315  | -383.969 | 0.3971492 | 0 | 0            | 0 | -0.00168775  |
| cov4_5_6_7_9_11  | 30.3237 | -383.974 | 0.3944595 | 0 | 0            | 0 | 0            |
| cov2_5_6_7_9_11  | 30.3251 | -383.974 | 0.3945721 | 0 | 0            | 0 | -0.000292778 |
| cov2_4_5_6_7_9   | 30.3256 | -383.975 | 0.3944668 | 0 | 0            | 0 | 0.000792368  |
| cov1_4_5_8_9_10  | 30.3285 | -383.976 | 0.3950002 | 0 | -0.00268739  | 0 | 0            |
| cov2_4_7_8_9_11  | 30.3439 | -383.984 | 0.3915786 | 0 | 0            | 0 | 0.015798061  |
| cov2_4_5_6_8_9   | 30.3488 | -383.986 | 0.3941861 | 0 | 0            | 0 | 0.001703484  |
| cov4_5_6_8_9_11  | 30.3488 | -383.986 | 0.3942297 | 0 | 0            | 0 | 0            |
| cov2_5_6_8_9_11  | 30.3518 | -383.988 | 0.3944023 | 0 | 0            | 0 | -0.000737018 |
| cov1_2_3_4_9_11  | 30.352  | -383.988 | 0.3967285 | 0 | -0.093310581 | 0 | 0.040754128  |
| cov1_2_4_8_10_11 | 30.3535 | -383.989 | 0.3932633 | 0 | -0.095953608 | 0 | 0.058554442  |
| cov2_4_5_6_9_11  | 30.3541 | -383.989 | 0.3939419 | 0 | 0            | 0 | 0.002647077  |
| cov2_3_7_8_9_11  | 30.3556 | -383.99  | 0.3992911 | 0 | 0            | 0 | -0.051906327 |
| cov4_6_7_8_9_11  | 30.3677 | -383.996 | 0.3924546 | 0 | 0            | 0 | 0            |
| cov2_3_7_8_9_10  | 30.3716 | -383.998 | 0.4003287 | 0 | 0            | 0 | -0.071259403 |

|                  |         |          |           |   |              |   |              |
|------------------|---------|----------|-----------|---|--------------|---|--------------|
| cov1_2_4_9_10_11 | 30.3772 | -384     | 0.3937449 | 0 | -0.094429299 | 0 | 0.057475272  |
| cov1_2_4_7_10_11 | 30.378  | -384.001 | 0.393493  | 0 | -0.094689706 | 0 | 0.057826377  |
| cov1_2_3_9_10_11 | 30.3784 | -384.001 | 0.4001673 | 0 | -0.10618829  | 0 | 0.013215875  |
| cov2_4_6_7_8_9   | 30.3847 | -384.004 | 0.3920844 | 0 | 0            | 0 | 0.015195282  |
| cov1_2_4_8_9_10  | 30.386  | -384.005 | 0.3931007 | 0 | -0.08736051  | 0 | 0.060215935  |
| cov2_3_4_5_9_11  | 30.3876 | -384.006 | 0.3965255 | 0 | 0            | 0 | 0.005084984  |
| cov1_2_4_7_9_10  | 30.4005 | -384.012 | 0.3933676 | 0 | -0.087385654 | 0 | 0.059274492  |
| cov1_4_6_8_9_11  | 30.4516 | -384.038 | 0.3946892 | 0 | -0.1300836   | 0 | 0            |
| cov1_2_4_5_9_11  | 30.459  | -384.041 | 0.3942011 | 0 | -0.048966934 | 0 | 0.035574812  |
| cov3_6_7_8_9_10  | 30.4621 | -384.043 | 0.3995729 | 0 | 0            | 0 | 0            |
| cov1_4_6_7_9_11  | 30.4666 | -384.045 | 0.3948869 | 0 | -0.12906902  | 0 | 0            |
| cov1_2_4_5_7_9   | 30.4921 | -384.058 | 0.3940488 | 0 | -0.038723    | 0 | 0.036267053  |
| cov1_2_4_5_8_9   | 30.5    | -384.062 | 0.3937428 | 0 | -0.041169351 | 0 | 0.038226475  |
| cov1_2_5_7_9_11  | 30.5355 | -384.08  | 0.3953839 | 0 | -0.029632187 | 0 | 0.0165772    |
| cov3_6_7_8_9_11  | 30.5363 | -384.08  | 0.3988048 | 0 | 0            | 0 | 0            |
| cov1_2_5_8_9_11  | 30.5483 | -384.086 | 0.395218  | 0 | -0.031662797 | 0 | 0.016535489  |
| cov2_4_5_7_9_11  | 30.5684 | -384.096 | 0.3944035 | 0 | 0            | 0 | 0.015427754  |
| cov1_4_5_7_9_11  | 30.5789 | -384.101 | 0.3953177 | 0 | -0.018508423 | 0 | 0            |
| cov2_4_5_8_9_11  | 30.5834 | -384.104 | 0.3941375 | 0 | 0            | 0 | 0.015638513  |
| cov1_4_5_8_9_11  | 30.5881 | -384.106 | 0.3950968 | 0 | -0.020847792 | 0 | 0            |
| cov1_2_4_8_9_11  | 30.6196 | -384.122 | 0.3933485 | 0 | -0.095470092 | 0 | 0.054852687  |
| cov1_2_4_7_9_11  | 30.6419 | -384.133 | 0.3935777 | 0 | -0.094217796 | 0 | 0.054141155  |
| cov3_4_6_8_10_11 | 30.6882 | -384.156 | 0.3966861 | 0 | 0            | 0 | 0            |
| cov1_2_6_9_10_11 | 30.7161 | -384.17  | 0.3971708 | 0 | -0.17080795  | 0 | 0.012584637  |
| cov1_2_6_7_10_11 | 30.7182 | -384.171 | 0.3971788 | 0 | -0.1694091   | 0 | 0.012375206  |
| cov1_2_6_8_10_11 | 30.7198 | -384.172 | 0.3970189 | 0 | -0.17102786  | 0 | 0.012356423  |
| cov2_3_4_8_10_11 | 30.7199 | -384.172 | 0.3965494 | 0 | 0            | 0 | -0.006504456 |
| cov3_4_8_9_10_11 | 30.7254 | -384.175 | 0.3961741 | 0 | 0            | 0 | 0            |
| cov1_2_6_7_9_10  | 30.7331 | -384.178 | 0.3971001 | 0 | -0.16429672  | 0 | 0.01337868   |
| cov1_6_7_9_10_11 | 30.7406 | -384.182 | 0.3973162 | 0 | -0.1601363   | 0 | 0            |
| cov1_6_8_9_10_11 | 30.7421 | -384.183 | 0.3971586 | 0 | -0.16176034  | 0 | 0            |
| cov1_2_6_8_9_10  | 30.7429 | -384.183 | 0.3969093 | 0 | -0.16492877  | 0 | 0.013502966  |
| cov1_4_8_9_10_11 | 30.7712 | -384.197 | 0.3949496 | 0 | -0.07085407  | 0 | 0            |
| cov1_4_7_9_10_11 | 30.7851 | -384.204 | 0.3951633 | 0 | -0.069905689 | 0 | 0            |
| cov2_3_4_6_8_10  | 30.7976 | -384.211 | 0.3972106 | 0 | 0            | 0 | -0.008398794 |
| cov3_4_6_8_9_10  | 30.8066 | -384.215 | 0.3967892 | 0 | 0            | 0 | 0            |
| cov3_4_6_7_10_11 | 30.8428 | -384.233 | 0.3965152 | 0 | 0            | 0 | 0            |
| cov2_3_4_7_10_11 | 30.8685 | -384.246 | 0.3962925 | 0 | 0            | 0 | -0.003812655 |
| cov3_4_7_9_10_11 | 30.8704 | -384.247 | 0.3960739 | 0 | 0            | 0 | 0            |
| cov3_7_8_9_10_11 | 30.8745 | -384.249 | 0.3985572 | 0 | 0            | 0 | 0            |
| cov2_3_4_8_9_10  | 30.9213 | -384.272 | 0.396772  | 0 | 0            | 0 | -0.019303772 |
| cov1_2_6_7_9_11  | 30.9253 | -384.274 | 0.3970969 | 0 | -0.16781455  | 0 | 0.010833115  |
| cov1_2_6_8_9_11  | 30.9276 | -384.276 | 0.3969358 | 0 | -0.16943252  | 0 | 0.010810235  |
| cov2_3_4_6_7_10  | 30.9679 | -384.296 | 0.3969436 | 0 | 0            | 0 | -0.006487244 |
| cov3_4_6_7_9_10  | 30.9732 | -384.298 | 0.3966139 | 0 | 0            | 0 | 0            |
| cov3_4_6_8_9_11  | 31.0188 | -384.321 | 0.396308  | 0 | 0            | 0 | 0            |
| cov2_3_4_8_9_11  | 31.046  | -384.335 | 0.3962782 | 0 | 0            | 0 | -0.008641787 |

|                  |         |          |           |   |             |   |              |
|------------------|---------|----------|-----------|---|-------------|---|--------------|
| cov2_3_4_6_10_11 | 31.0772 | -384.35  | 0.3953811 | 0 | 0           | 0 | 0.00824722   |
| cov2_3_4_7_9_10  | 31.0828 | -384.353 | 0.3965137 | 0 | 0           | 0 | -0.017033164 |
| cov3_4_6_9_10_11 | 31.0858 | -384.355 | 0.3957928 | 0 | 0           | 0 | 0            |
| cov2_3_4_9_10_11 | 31.0891 | -384.356 | 0.3952408 | 0 | 0           | 0 | 0.0056995    |
| cov2_3_6_8_10_11 | 31.0949 | -384.359 | 0.4005467 | 0 | 0           | 0 | -0.041224634 |
| cov2_3_4_6_8_9   | 31.1066 | -384.365 | 0.3968917 | 0 | 0           | 0 | -0.010101844 |
| cov3_4_6_7_9_11  | 31.1601 | -384.392 | 0.3961372 | 0 | 0           | 0 | 0            |
| cov1_2_7_9_10_11 | 31.1767 | -384.4   | 0.3971155 | 0 | -0.11390576 | 0 | 0.013985326  |
| cov1_2_8_9_10_11 | 31.1803 | -384.402 | 0.3969372 | 0 | -0.1155171  | 0 | 0.013965968  |
| cov2_3_4_7_9_11  | 31.1831 | -384.403 | 0.396019  | 0 | 0           | 0 | -0.005895815 |
| cov2_3_8_9_10_11 | 31.2023 | -384.413 | 0.4005139 | 0 | 0           | 0 | -0.05279405  |
| cov2_3_6_8_9_10  | 31.2079 | -384.416 | 0.4009811 | 0 | 0           | 0 | -0.047175454 |
| cov2_6_7_8_10_11 | 31.2281 | -384.426 | 0.3959848 | 0 | 0           | 0 | -0.033741686 |
| cov2_3_4_6_9_10  | 31.2606 | -384.442 | 0.3956759 | 0 | 0           | 0 | 0.001938974  |
| cov2_3_4_6_7_9   | 31.2639 | -384.444 | 0.3966221 | 0 | 0           | 0 | -0.008133851 |
| cov2_3_6_7_10_11 | 31.288  | -384.456 | 0.4004506 | 0 | 0           | 0 | -0.040719144 |
| cov2_6_7_8_9_10  | 31.309  | -384.466 | 0.3962773 | 0 | 0           | 0 | -0.03879756  |
| cov2_3_4_6_9_11  | 31.3551 | -384.489 | 0.3952151 | 0 | 0           | 0 | 0.005430108  |
| cov2_3_7_9_10_11 | 31.3858 | -384.505 | 0.4004198 | 0 | 0           | 0 | -0.051769352 |
| cov2_7_8_9_10_11 | 31.396  | -384.51  | 0.3959357 | 0 | 0           | 0 | -0.048205107 |
| cov2_3_6_8_9_11  | 31.4014 | -384.513 | 0.4002032 | 0 | 0           | 0 | -0.042408269 |
| cov2_6_7_8_9_11  | 31.4017 | -384.513 | 0.3958353 | 0 | 0           | 0 | -0.034793637 |
| cov2_4_6_7_10_11 | 31.4027 | -384.513 | 0.3923721 | 0 | 0           | 0 | 0.021320748  |
| cov2_4_6_8_10_11 | 31.4051 | -384.514 | 0.3921449 | 0 | 0           | 0 | 0.021709466  |
| cov2_4_6_9_10_11 | 31.4065 | -384.515 | 0.3922239 | 0 | 0           | 0 | 0.021550447  |
| cov2_4_7_9_10_11 | 31.4122 | -384.518 | 0.3922497 | 0 | 0           | 0 | 0.018998124  |
| cov2_4_8_9_10_11 | 31.416  | -384.52  | 0.3920144 | 0 | 0           | 0 | 0.019214812  |
| cov2_3_6_7_9_10  | 31.4167 | -384.52  | 0.4009049 | 0 | 0           | 0 | -0.047085718 |
| cov4_6_7_9_10_11 | 31.4653 | -384.544 | 0.3930882 | 0 | 0           | 0 | 0            |
| cov4_6_8_9_10_11 | 31.47   | -384.547 | 0.3928711 | 0 | 0           | 0 | 0            |
| cov3_6_8_9_10_11 | 31.4736 | -384.549 | 0.3999867 | 0 | 0           | 0 | 0            |
| cov6_7_8_9_10_11 | 31.4831 | -384.553 | 0.3956493 | 0 | 0           | 0 | 0            |
| cov2_4_6_8_9_10  | 31.4939 | -384.559 | 0.392482  | 0 | 0           | 0 | 0.016247697  |
| cov2_4_6_7_9_10  | 31.5072 | -384.565 | 0.3927421 | 0 | 0           | 0 | 0.015384572  |
| cov2_3_6_7_9_11  | 31.582  | -384.603 | 0.4001069 | 0 | 0           | 0 | -0.041860567 |
| cov1_3_5_6_7_8   | 31.6373 | -384.63  | 0.4054352 | 0 | -0.19526486 | 0 | 0            |
| cov2_4_6_7_9_11  | 31.6489 | -384.636 | 0.3923572 | 0 | 0           | 0 | 0.018017545  |
| cov2_4_6_8_9_11  | 31.653  | -384.638 | 0.3921286 | 0 | 0           | 0 | 0.018387897  |
| cov3_6_7_9_10_11 | 31.6572 | -384.64  | 0.3998985 | 0 | 0           | 0 | 0            |
| cov2_3_6_9_10_11 | 31.684  | -384.654 | 0.3997735 | 0 | 0           | 0 | -0.036931371 |
| cov1_3_5_7_8_11  | 31.7121 | -384.668 | 0.4054995 | 0 | -0.17459766 | 0 | 0            |
| cov1_3_4_5_7_8   | 31.7191 | -384.671 | 0.4045266 | 0 | -0.16392586 | 0 | 0            |
| cov1_3_6_7_8_11  | 31.7308 | -384.677 | 0.4046485 | 0 | -0.16619178 | 0 | 0            |
| cov1_2_3_5_7_8   | 31.7646 | -384.694 | 0.4052024 | 0 | -0.16624632 | 0 | 0.005403112  |
| cov1_2_3_6_7_8   | 31.766  | -384.695 | 0.4044145 | 0 | -0.16251376 | 0 | 0.006475675  |
| cov1_3_4_6_7_8   | 31.7732 | -384.698 | 0.4044708 | 0 | -0.15783162 | 0 | 0            |
| cov1_2_3_7_8_11  | 31.8418 | -384.733 | 0.4044661 | 0 | -0.14155246 | 0 | 0.006232671  |

|                  |         |          |           |   |             |   |              |
|------------------|---------|----------|-----------|---|-------------|---|--------------|
| cov1_3_4_7_8_11  | 31.8479 | -384.736 | 0.404584  | 0 | -0.13778196 | 0 | 0            |
| cov1_2_3_4_7_8   | 31.8936 | -384.759 | 0.404032  | 0 | -0.13022063 | 0 | 0.009381923  |
| cov1_2_4_6_7_8   | 31.9879 | -384.806 | 0.4009712 | 0 | -0.15500909 | 0 | 0.023102799  |
| cov1_4_6_7_8_11  | 32.0107 | -384.817 | 0.4014607 | 0 | -0.15174002 | 0 | 0            |
| cov1_4_5_6_7_8   | 32.0506 | -384.837 | 0.4010005 | 0 | -0.14743352 | 0 | 0            |
| cov1_5_6_7_8_11  | 32.0582 | -384.841 | 0.4019966 | 0 | -0.15420812 | 0 | 0            |
| cov1_2_6_7_8_11  | 32.0591 | -384.841 | 0.4019179 | 0 | -0.16659789 | 0 | 0.006930213  |
| cov1_2_4_7_8_11  | 32.0762 | -384.85  | 0.4010176 | 0 | -0.13273541 | 0 | 0.022299982  |
| cov1_2_4_5_7_8   | 32.0795 | -384.852 | 0.3999182 | 0 | -0.14229838 | 0 | 0.034515525  |
| cov1_2_5_6_7_8   | 32.0909 | -384.857 | 0.4017911 | 0 | -0.15131122 | 0 | 0.008296332  |
| cov1_4_5_7_8_11  | 32.1356 | -384.88  | 0.4010992 | 0 | -0.12513872 | 0 | 0            |
| cov1_2_5_7_8_11  | 32.1696 | -384.897 | 0.4018    | 0 | -0.1298579  | 0 | 0.008062713  |
| cov1_3_4_5_6_8   | 32.5284 | -385.076 | 0.4055502 | 0 | -0.21704353 | 0 | 0            |
| cov1_3_5_6_8_11  | 32.5493 | -385.086 | 0.4067086 | 0 | -0.22376557 | 0 | 0            |
| cov1_2_3_5_6_8   | 32.6023 | -385.113 | 0.4064234 | 0 | -0.21620051 | 0 | 0.003825025  |
| cov2_6_7_9_10_11 | 32.6261 | -385.125 | 0.3967116 | 0 | 0           | 0 | -0.037284159 |
| cov2_6_8_9_10_11 | 32.6686 | -385.146 | 0.3965401 | 0 | 0           | 0 | -0.037891513 |
| cov1_3_4_5_6_7   | 32.6719 | -385.148 | 0.4052736 | 0 | -0.20887466 | 0 | 0            |
| cov1_2_3_4_5_8   | 32.6749 | -385.149 | 0.4044519 | 0 | -0.19807301 | 0 | 0.030937412  |
| cov1_3_4_5_8_11  | 32.6879 | -385.156 | 0.4057403 | 0 | -0.18758582 | 0 | 0            |
| cov1_3_5_6_7_11  | 32.6927 | -385.158 | 0.4063419 | 0 | -0.2147785  | 0 | 0            |
| cov1_2_3_5_6_7   | 32.7344 | -385.179 | 0.4060884 | 0 | -0.20853037 | 0 | 0.004374851  |
| cov1_2_3_6_8_11  | 32.7388 | -385.181 | 0.4055169 | 0 | -0.18266703 | 0 | 0.005143612  |
| cov1_3_4_6_8_11  | 32.7427 | -385.183 | 0.4056339 | 0 | -0.17989322 | 0 | 0            |
| cov1_2_3_5_8_11  | 32.7513 | -385.187 | 0.4065051 | 0 | -0.18780767 | 0 | 0.003647555  |
| cov1_2_3_4_6_8   | 32.7901 | -385.207 | 0.4051379 | 0 | -0.17344999 | 0 | 0.00764596   |
| cov1_2_3_4_5_6   | 32.792  | -385.208 | 0.4032728 | 0 | -0.20079565 | 0 | 0.027394203  |
| cov1_2_3_6_7_11  | 32.8215 | -385.223 | 0.4053179 | 0 | -0.18107254 | 0 | 0.005386994  |
| cov1_3_4_6_7_11  | 32.8266 | -385.225 | 0.4053252 | 0 | -0.17684728 | 0 | 0            |
| cov1_2_3_4_5_7   | 32.829  | -385.226 | 0.4041793 | 0 | -0.18823453 | 0 | 0.030110291  |
| cov1_3_4_5_6_11  | 32.8474 | -385.236 | 0.4042763 | 0 | -0.18385055 | 0 | 0            |
| cov1_3_4_5_7_11  | 32.8504 | -385.237 | 0.4054173 | 0 | -0.17719681 | 0 | 0            |
| cov1_2_3_4_6_7   | 32.8596 | -385.242 | 0.4047833 | 0 | -0.17216026 | 0 | 0.00960296   |
| cov1_2_3_5_6_11  | 32.8791 | -385.251 | 0.4049689 | 0 | -0.18715268 | 0 | 0.005400278  |
| cov1_2_3_4_6_11  | 32.8848 | -385.254 | 0.4041757 | 0 | -0.17453541 | 0 | 0.012607328  |
| cov1_2_3_5_7_11  | 32.902  | -385.263 | 0.40611   | 0 | -0.17806752 | 0 | 0.004376522  |
| cov1_2_3_4_8_11  | 32.9427 | -385.283 | 0.4053274 | 0 | -0.14482684 | 0 | 0.006258455  |
| cov1_2_4_5_6_11  | 32.9968 | -385.31  | 0.4007099 | 0 | -0.19761667 | 0 | 0.034894537  |
| cov1_2_3_4_5_11  | 33.0036 | -385.314 | 0.4032982 | 0 | -0.1624878  | 0 | 0.026037461  |
| cov1_2_3_4_7_11  | 33.0292 | -385.326 | 0.4049245 | 0 | -0.14193016 | 0 | 0.008482964  |
| cov1_2_4_5_6_7   | 33.0332 | -385.328 | 0.4006108 | 0 | -0.18822748 | 0 | 0.035491723  |
| cov1_2_4_5_6_8   | 33.0436 | -385.334 | 0.4003124 | 0 | -0.19102768 | 0 | 0.037300965  |
| cov1_2_4_6_7_11  | 33.0504 | -385.337 | 0.401765  | 0 | -0.17317482 | 0 | 0.022604146  |
| cov1_2_4_6_8_11  | 33.0618 | -385.343 | 0.4015863 | 0 | -0.17470746 | 0 | 0.023087383  |
| cov1_4_5_6_7_11  | 33.1093 | -385.366 | 0.4018082 | 0 | -0.16695244 | 0 | 0            |
| cov1_4_5_6_8_11  | 33.1203 | -385.372 | 0.4015848 | 0 | -0.169363   | 0 | 0            |
| cov1_2_5_6_7_11  | 33.1591 | -385.391 | 0.4026343 | 0 | -0.16929261 | 0 | 0.007252096  |

|                    |         |          |           |   |              |   |              |
|--------------------|---------|----------|-----------|---|--------------|---|--------------|
| cov1_2_5_6_8_11    | 33.1803 | -385.402 | 0.4024744 | 0 | -0.1714742   | 0 | 0.007198756  |
| cov1_2_4_5_7_11    | 33.229  | -385.426 | 0.4007316 | 0 | -0.15306484  | 0 | 0.033686162  |
| cov1_2_4_5_8_11    | 33.2306 | -385.427 | 0.4004472 | 0 | -0.15680602  | 0 | 0.035384004  |
| cov2_4_5_6_7_8     | 33.3076 | -385.466 | 0.4029671 | 0 | 0            | 0 | -0.03385287  |
| cov2_5_6_7_8_11    | 33.3102 | -385.467 | 0.4023801 | 0 | 0            | 0 | -0.026359543 |
| cov2_3_5_6_7_8     | 33.3146 | -385.469 | 0.4030436 | 0 | 0            | 0 | -0.030028509 |
| cov2_4_5_7_8_11    | 33.4351 | -385.529 | 0.4034559 | 0 | 0            | 0 | -0.045336008 |
| cov4_5_6_7_8_11    | 33.4386 | -385.531 | 0.4020793 | 0 | 0            | 0 | 0            |
| cov3_5_6_7_8_11    | 33.4529 | -385.538 | 0.4025235 | 0 | 0            | 0 | 0            |
| cov3_4_5_6_7_8     | 33.4785 | -385.551 | 0.4021937 | 0 | 0            | 0 | 0            |
| cov2_3_5_7_8_11    | 33.4793 | -385.551 | 0.4026002 | 0 | 0            | 0 | -0.036300859 |
| cov2_3_4_5_7_8     | 33.4806 | -385.552 | 0.4039347 | 0 | 0            | 0 | -0.052208439 |
| cov2_3_6_7_8_11    | 33.6329 | -385.628 | 0.4041827 | 0 | 0            | 0 | -0.044154405 |
| cov2_3_4_6_7_8     | 33.6389 | -385.631 | 0.4032049 | 0 | 0            | 0 | -0.034632494 |
| cov2_4_6_7_8_11    | 33.6813 | -385.652 | 0.4008393 | 0 | 0            | 0 | -0.019896253 |
| cov3_4_6_7_8_11    | 33.6975 | -385.661 | 0.4017409 | 0 | 0            | 0 | 0            |
| cov3_4_5_7_8_11    | 33.7352 | -385.679 | 0.4014919 | 0 | 0            | 0 | 0            |
| cov2_3_4_7_8_11    | 34.184  | -385.904 | 0.4024079 | 0 | 0            | 0 | -0.050976915 |
| cov2_4_5_6_7_11    | 34.5662 | -386.095 | 0.4035599 | 0 | 0            | 0 | -0.034798928 |
| cov2_3_4_5_6_7     | 34.5679 | -386.096 | 0.4044384 | 0 | 0            | 0 | -0.040601975 |
| cov2_3_5_6_7_11    | 34.5756 | -386.1   | 0.4035374 | 0 | 0            | 0 | -0.030165306 |
| cov2_3_4_5_6_11    | 34.5828 | -386.103 | 0.4047782 | 0 | 0            | 0 | -0.041546769 |
| cov2_3_4_5_6_8     | 34.5951 | -386.109 | 0.4048251 | 0 | 0            | 0 | -0.043074797 |
| cov2_3_5_6_8_11    | 34.6067 | -386.115 | 0.4039232 | 0 | 0            | 0 | -0.03266214  |
| cov2_4_5_6_8_11    | 34.6317 | -386.128 | 0.4033316 | 0 | 0            | 0 | -0.034528779 |
| cov2_3_4_5_7_11    | 34.6382 | -386.131 | 0.4042962 | 0 | 0            | 0 | -0.046322942 |
| cov2_3_4_5_8_11    | 34.6941 | -386.159 | 0.4046957 | 0 | 0            | 0 | -0.050102042 |
| cov3_4_5_6_7_11    | 34.7355 | -386.18  | 0.4026656 | 0 | 0            | 0 | 0            |
| cov3_4_5_6_8_11    | 34.7925 | -386.208 | 0.402965  | 0 | 0            | 0 | 0            |
| cov2_3_4_6_8_11    | 34.9011 | -386.262 | 0.4040151 | 0 | 0            | 0 | -0.035615928 |
| cov2_3_4_6_7_11    | 34.9215 | -386.273 | 0.4035668 | 0 | 0            | 0 | -0.032544655 |
| cov1_3_5_6_7_8_10  | 35.0437 | -382.819 | 0.3987169 | 0 | -0.10884966  | 0 | 0            |
| cov1_3_4_6_7_8_10  | 35.1079 | -382.851 | 0.3990639 | 0 | -0.13733897  | 0 | 0            |
| cov1_2_3_6_7_8_10  | 35.1639 | -382.879 | 0.400264  | 0 | -0.160217    | 0 | 0.011176896  |
| cov1_3_6_7_8_10_11 | 35.1713 | -382.883 | 0.4004929 | 0 | -0.1564154   | 0 | 0            |
| cov1_3_6_7_8_9_10  | 35.1757 | -382.885 | 0.4004673 | 0 | -0.15167456  | 0 | 0            |
| cov1_2_3_4_7_8_10  | 35.3812 | -382.988 | 0.3975347 | 0 | -0.096810871 | 0 | 0.035669677  |
| cov1_2_3_5_7_8_10  | 35.4223 | -383.008 | 0.398396  | 0 | -0.065898933 | 0 | 0.015416624  |
| cov1_3_5_6_7_8_9   | 35.4226 | -383.009 | 0.3985331 | 0 | -0.11162443  | 0 | 0            |
| cov1_3_5_7_8_10_11 | 35.4345 | -383.015 | 0.3988211 | 0 | -0.064379362 | 0 | 0            |
| cov1_3_5_7_8_9_10  | 35.4532 | -383.024 | 0.3987486 | 0 | -0.05649963  | 0 | 0            |
| cov1_3_4_6_7_8_9   | 35.457  | -383.026 | 0.3987071 | 0 | -0.13548486  | 0 | 0            |
| cov1_3_4_5_7_8_10  | 35.4614 | -383.028 | 0.3984748 | 0 | -0.055830777 | 0 | 0            |
| cov1_3_4_7_8_10_11 | 35.4933 | -383.044 | 0.3992387 | 0 | -0.091385533 | 0 | 0            |
| cov1_3_4_7_8_9_10  | 35.5149 | -383.055 | 0.3991882 | 0 | -0.083287399 | 0 | 0            |
| cov1_3_6_7_8_9_11  | 35.5156 | -383.055 | 0.4001798 | 0 | -0.15549414  | 0 | 0            |
| cov1_2_3_6_7_8_9   | 35.5196 | -383.057 | 0.3999485 | 0 | -0.15704533  | 0 | 0.009415818  |

|                    |         |          |           |   |              |   |              |
|--------------------|---------|----------|-----------|---|--------------|---|--------------|
| cov1_2_3_7_8_10_11 | 35.5252 | -383.06  | 0.4001848 | 0 | -0.11379196  | 0 | 0.011800969  |
| cov1_3_7_8_9_10_11 | 35.5367 | -383.066 | 0.4004364 | 0 | -0.10505624  | 0 | 0            |
| cov1_2_3_7_8_9_10  | 35.5372 | -383.066 | 0.4001354 | 0 | -0.10723192  | 0 | 0.013075023  |
| cov1_2_5_6_7_8_10  | 35.5564 | -383.075 | 0.394593  | 0 | -0.06783742  | 0 | 0.01823046   |
| cov3_5_6_7_8_10_11 | 35.5584 | -383.076 | 0.3960139 | 0 | 0            | 0 | 0            |
| cov2_3_5_6_7_8_10  | 35.5672 | -383.081 | 0.3961503 | 0 | 0            | 0 | -0.003967288 |
| cov3_5_6_7_8_9_10  | 35.5691 | -383.082 | 0.3960787 | 0 | 0            | 0 | 0            |
| cov3_4_5_6_7_8_10  | 35.5702 | -383.082 | 0.3960552 | 0 | 0            | 0 | 0            |
| cov1_5_6_7_8_10_11 | 35.6014 | -383.098 | 0.3948421 | 0 | -0.059797282 | 0 | 0            |
| cov1_4_5_6_7_8_10  | 35.6111 | -383.103 | 0.3945231 | 0 | -0.05538152  | 0 | 0            |
| cov1_5_6_7_8_9_10  | 35.6126 | -383.104 | 0.3947426 | 0 | -0.05474229  | 0 | 0            |
| cov3_5_7_8_9_10_11 | 35.6546 | -383.125 | 0.3967867 | 0 | 0            | 0 | 0            |
| cov2_3_5_7_8_9_10  | 35.6548 | -383.125 | 0.3967343 | 0 | 0            | 0 | 0.001098962  |
| cov3_4_5_7_8_9_10  | 35.6551 | -383.125 | 0.3967849 | 0 | 0            | 0 | 0            |
| cov2_3_5_7_8_10_11 | 35.6576 | -383.126 | 0.3966664 | 0 | 0            | 0 | 0.001480619  |
| cov2_3_4_5_7_8_10  | 35.6579 | -383.126 | 0.39662   | 0 | 0            | 0 | 0.001577605  |
| cov3_4_5_7_8_10_11 | 35.658  | -383.126 | 0.3967219 | 0 | 0            | 0 | 0            |
| cov1_2_4_6_7_8_10  | 35.7245 | -383.16  | 0.3925879 | 0 | -0.14122668  | 0 | 0.059200131  |
| cov1_2_3_4_7_8_9   | 35.7395 | -383.167 | 0.3973372 | 0 | -0.094788152 | 0 | 0.032959749  |
| cov2_4_5_6_7_8_10  | 35.7794 | -383.187 | 0.3938547 | 0 | 0            | 0 | 0.00666815   |
| cov2_5_6_7_8_10_11 | 35.7802 | -383.187 | 0.3940195 | 0 | 0            | 0 | 0.004860978  |
| cov2_5_6_7_8_9_10  | 35.7815 | -383.188 | 0.394092  | 0 | 0            | 0 | 0.004289043  |
| cov5_6_7_8_9_10_11 | 35.7843 | -383.189 | 0.3941263 | 0 | 0            | 0 | 0            |
| cov4_5_6_7_8_10_11 | 35.7848 | -383.19  | 0.3940719 | 0 | 0            | 0 | 0            |
| cov4_5_6_7_8_9_10  | 35.7852 | -383.19  | 0.3941251 | 0 | 0            | 0 | 0            |
| cov1_3_5_7_8_9_11  | 35.7917 | -383.193 | 0.3986904 | 0 | -0.069240464 | 0 | 0            |
| cov1_2_3_5_7_8_9   | 35.7971 | -383.196 | 0.3982875 | 0 | -0.068421091 | 0 | 0.013259375  |
| cov1_3_4_5_7_8_9   | 35.8219 | -383.208 | 0.3982514 | 0 | -0.060097202 | 0 | 0            |
| cov1_3_4_7_8_9_11  | 35.8239 | -383.209 | 0.3989336 | 0 | -0.091353816 | 0 | 0            |
| cov1_2_3_7_8_9_11  | 35.863  | -383.229 | 0.3999232 | 0 | -0.11246083  | 0 | 0.009988334  |
| cov1_2_3_4_6_8_10  | 35.8865 | -383.241 | 0.3984114 | 0 | -0.16351146  | 0 | 0.035393244  |
| cov1_2_5_6_7_8_9   | 35.9012 | -383.248 | 0.3945805 | 0 | -0.070843955 | 0 | 0.015910841  |
| cov1_2_4_5_7_8_10  | 35.9017 | -383.248 | 0.393419  | 0 | -0.032681052 | 0 | 0.036748361  |
| cov1_5_6_7_8_9_11  | 35.9272 | -383.261 | 0.394823  | 0 | -0.065268413 | 0 | 0            |
| cov1_4_5_6_7_8_9   | 35.9376 | -383.266 | 0.3943956 | 0 | -0.060368944 | 0 | 0            |
| cov1_2_5_7_8_10_11 | 35.9458 | -383.27  | 0.3946298 | 0 | -0.023283307 | 0 | 0.018701224  |
| cov2_4_5_7_8_10_11 | 35.9573 | -383.276 | 0.3937337 | 0 | 0            | 0 | 0.019376225  |
| cov2_4_5_7_8_9_10  | 35.9581 | -383.276 | 0.3937098 | 0 | 0            | 0 | 0.020913606  |
| cov1_2_5_7_8_9_10  | 35.9646 | -383.28  | 0.3945208 | 0 | -0.016330666 | 0 | 0.01980259   |
| cov3_5_6_7_8_9_11  | 35.9656 | -383.28  | 0.3957145 | 0 | 0            | 0 | 0            |
| cov2_3_5_6_7_8_9   | 35.9658 | -383.28  | 0.3959098 | 0 | 0            | 0 | -0.006444086 |
| cov1_2_3_5_6_8_10  | 35.9696 | -383.282 | 0.3996103 | 0 | -0.13581094  | 0 | 0.013535268  |
| cov3_4_5_6_7_8_9   | 35.9733 | -383.284 | 0.3956577 | 0 | 0            | 0 | 0            |
| cov2_5_7_8_9_10_11 | 35.9761 | -383.285 | 0.39441   | 0 | 0            | 0 | 0.012884211  |
| cov1_3_5_6_8_10_11 | 35.9828 | -383.289 | 0.399963  | 0 | -0.13307716  | 0 | 0            |
| cov1_3_4_5_6_8_10  | 35.9901 | -383.292 | 0.3994865 | 0 | -0.12861425  | 0 | 0            |
| cov1_3_5_6_8_9_10  | 35.9934 | -383.294 | 0.3999013 | 0 | -0.12769841  | 0 | 0            |

|                    |         |          |           |   |              |   |              |
|--------------------|---------|----------|-----------|---|--------------|---|--------------|
| cov1_5_7_8_9_10_11 | 36.0031 | -383.299 | 0.394847  | 0 | -0.010450737 | 0 | 0            |
| cov1_4_5_7_8_10_11 | 36.0055 | -383.3   | 0.3946855 | 0 | -0.010456929 | 0 | 0            |
| cov1_2_4_6_7_8_9   | 36.0074 | -383.301 | 0.3926239 | 0 | -0.13902284  | 0 | 0.055494759  |
| cov1_3_4_6_8_10_11 | 36.0076 | -383.301 | 0.4000716 | 0 | -0.15493054  | 0 | 0            |
| cov4_5_7_8_9_10_11 | 36.0108 | -383.303 | 0.3946041 | 0 | 0            | 0 | 0            |
| cov1_3_4_6_8_9_10  | 36.0211 | -383.308 | 0.4000198 | 0 | -0.14932577  | 0 | 0            |
| cov1_4_5_7_8_9_10  | 36.0325 | -383.314 | 0.3945636 | 0 | -0.001384546 | 0 | 0            |
| cov2_3_4_5_7_8_9   | 36.0481 | -383.321 | 0.3963385 | 0 | 0            | 0 | -0.000687566 |
| cov3_4_5_7_8_9_11  | 36.0481 | -383.321 | 0.3963024 | 0 | 0            | 0 | 0            |
| cov2_3_5_7_8_9_11  | 36.0484 | -383.321 | 0.3964343 | 0 | 0            | 0 | -0.001491849 |
| cov1_2_3_6_8_10_11 | 36.0607 | -383.328 | 0.4012028 | 0 | -0.17606991  | 0 | 0.010396795  |
| cov1_2_3_6_8_9_10  | 36.0666 | -383.331 | 0.4011616 | 0 | -0.17162704  | 0 | 0.011436732  |
| cov1_3_6_8_9_10_11 | 36.0694 | -383.332 | 0.4014124 | 0 | -0.16846436  | 0 | 0            |
| cov1_2_3_4_6_7_10  | 36.0729 | -383.334 | 0.3982033 | 0 | -0.16302137  | 0 | 0.036882252  |
| cov1_2_4_7_8_10_11 | 36.1194 | -383.357 | 0.39282   | 0 | -0.093289658 | 0 | 0.057306546  |
| cov1_2_3_5_6_7_10  | 36.133  | -383.364 | 0.3992726 | 0 | -0.12865782  | 0 | 0.014038008  |
| cov1_4_6_7_8_10_11 | 36.1356 | -383.365 | 0.3943196 | 0 | -0.11851644  | 0 | 0            |
| cov1_2_4_7_8_9_10  | 36.138  | -383.366 | 0.3927074 | 0 | -0.08662003  | 0 | 0.058634362  |
| cov2_4_5_6_7_8_9   | 36.1434 | -383.369 | 0.3937698 | 0 | 0            | 0 | 0.003816447  |
| cov4_5_6_7_8_9_11  | 36.145  | -383.37  | 0.3938892 | 0 | 0            | 0 | 0            |
| cov2_5_6_7_8_9_11  | 36.1459 | -383.37  | 0.3939721 | 0 | 0            | 0 | 0.001564111  |
| cov1_3_5_6_7_10_11 | 36.1543 | -383.374 | 0.3995982 | 0 | -0.12460455  | 0 | 0            |
| cov1_4_6_7_8_9_10  | 36.1571 | -383.376 | 0.394184  | 0 | -0.11215351  | 0 | 0            |
| cov1_3_4_5_6_7_10  | 36.1596 | -383.377 | 0.399204  | 0 | -0.12086646  | 0 | 0            |
| cov1_3_5_6_7_9_10  | 36.1601 | -383.377 | 0.3995607 | 0 | -0.12020426  | 0 | 0            |
| cov1_3_4_6_7_10_11 | 36.212  | -383.403 | 0.3999048 | 0 | -0.15304193  | 0 | 0            |
| cov1_3_4_6_7_9_10  | 36.2203 | -383.407 | 0.3998754 | 0 | -0.14826309  | 0 | 0            |
| cov1_2_4_5_7_8_9   | 36.2272 | -383.411 | 0.3933855 | 0 | -0.037435212 | 0 | 0.035403675  |
| cov1_2_3_4_6_8_9   | 36.2699 | -383.432 | 0.3981882 | 0 | -0.16049553  | 0 | 0.032570898  |
| cov1_2_5_7_8_9_11  | 36.2714 | -383.433 | 0.3946659 | 0 | -0.028172249 | 0 | 0.0163422    |
| cov1_2_3_6_7_10_11 | 36.2761 | -383.435 | 0.4011414 | 0 | -0.17537523  | 0 | 0.010532799  |
| cov1_2_3_6_7_9_10  | 36.2773 | -383.436 | 0.4011269 | 0 | -0.17170318  | 0 | 0.011454498  |
| cov1_3_6_7_9_10_11 | 36.2856 | -383.44  | 0.4013493 | 0 | -0.16766606  | 0 | 0            |
| cov2_4_5_7_8_9_11  | 36.2997 | -383.447 | 0.3937107 | 0 | 0            | 0 | 0.015477446  |
| cov1_4_5_7_8_9_11  | 36.314  | -383.454 | 0.3946066 | 0 | -0.017178017 | 0 | 0            |
| cov1_2_3_4_5_6_10  | 36.3561 | -383.475 | 0.3968334 | 0 | -0.10920005  | 0 | 0.028807673  |
| cov1_3_4_6_8_9_11  | 36.3631 | -383.479 | 0.3997428 | 0 | -0.15398001  | 0 | 0            |
| cov1_4_6_7_8_9_11  | 36.3632 | -383.479 | 0.3942419 | 0 | -0.11876501  | 0 | 0            |
| cov1_3_5_6_8_9_11  | 36.3633 | -383.479 | 0.3998168 | 0 | -0.13695862  | 0 | 0            |
| cov1_2_3_5_6_8_9   | 36.3661 | -383.48  | 0.3994765 | 0 | -0.13735631  | 0 | 0.011308428  |
| cov1_3_4_5_6_8_9   | 36.3697 | -383.482 | 0.3992312 | 0 | -0.13201799  | 0 | 0            |
| cov1_2_4_7_8_9_11  | 36.3865 | -383.491 | 0.3928971 | 0 | -0.092774641 | 0 | 0.053596062  |
| cov1_2_3_5_6_9_10  | 36.3894 | -383.492 | 0.3978444 | 0 | -0.09872803  | 0 | 0.016143832  |
| cov1_2_3_5_6_10_11 | 36.3943 | -383.494 | 0.3977523 | 0 | -0.098317222 | 0 | 0.015914277  |
| cov1_2_3_6_8_9_11  | 36.4228 | -383.509 | 0.4009172 | 0 | -0.17376647  | 0 | 0.008501573  |
| cov1_2_3_4_8_10_11 | 36.4337 | -383.514 | 0.398733  | 0 | -0.10767965  | 0 | 0.033130134  |
| cov1_3_5_6_9_10_11 | 36.4343 | -383.514 | 0.3979938 | 0 | -0.087997869 | 0 | 0            |

|                    |         |          |           |   |              |   |              |
|--------------------|---------|----------|-----------|---|--------------|---|--------------|
| cov1_3_4_5_6_9_10  | 36.4347 | -383.515 | 0.397953  | 0 | -0.087365179 | 0 | 0            |
| cov1_3_4_5_6_10_11 | 36.4381 | -383.516 | 0.3978745 | 0 | -0.087666183 | 0 | 0            |
| cov1_2_3_4_6_7_9   | 36.4435 | -383.519 | 0.3979741 | 0 | -0.15997209  | 0 | 0.034113367  |
| cov1_2_3_4_8_9_10  | 36.4556 | -383.525 | 0.3986302 | 0 | -0.099900055 | 0 | 0.034647015  |
| cov1_2_3_4_5_8_10  | 36.4673 | -383.531 | 0.3984156 | 0 | -0.09247599  | 0 | 0.032734776  |
| cov1_2_3_5_8_10_11 | 36.5008 | -383.548 | 0.3997763 | 0 | -0.085195138 | 0 | 0.013968685  |
| cov1_4_7_8_9_10_11 | 36.5203 | -383.557 | 0.394462  | 0 | -0.068693988 | 0 | 0            |
| cov1_2_3_5_6_7_9   | 36.5213 | -383.558 | 0.3991295 | 0 | -0.13006524  | 0 | 0.011828139  |
| cov1_3_5_8_9_10_11 | 36.523  | -383.559 | 0.4001391 | 0 | -0.077451567 | 0 | 0            |
| cov1_2_3_5_8_9_10  | 36.5246 | -383.56  | 0.3996806 | 0 | -0.07721642  | 0 | 0.015389905  |
| cov3_4_6_7_8_10_11 | 36.5264 | -383.56  | 0.3960476 | 0 | 0            | 0 | 0            |
| cov1_3_5_6_7_9_11  | 36.5275 | -383.561 | 0.3994436 | 0 | -0.1283403   | 0 | 0            |
| cov1_3_4_5_8_10_11 | 36.5283 | -383.561 | 0.3997869 | 0 | -0.077445445 | 0 | 0            |
| cov1_3_4_5_6_7_9   | 36.5319 | -383.563 | 0.398941  | 0 | -0.12413207  | 0 | 0            |
| cov1_2_3_4_6_9_10  | 36.5372 | -383.566 | 0.3967449 | 0 | -0.15499803  | 0 | 0.045281008  |
| cov1_2_3_4_6_10_11 | 36.5415 | -383.568 | 0.3966005 | 0 | -0.15320019  | 0 | 0.045368663  |
| cov1_3_4_8_9_10_11 | 36.546  | -383.57  | 0.4003177 | 0 | -0.096455224 | 0 | 0            |
| cov1_3_4_6_7_9_11  | 36.5551 | -383.575 | 0.3995718 | 0 | -0.15201969  | 0 | 0            |
| cov1_3_4_5_8_9_10  | 36.561  | -383.578 | 0.3996969 | 0 | -0.067352289 | 0 | 0            |
| cov1_2_3_8_9_10_11 | 36.5645 | -383.58  | 0.4011528 | 0 | -0.11781878  | 0 | 0.012200414  |
| cov2_3_4_7_8_10_11 | 36.5855 | -383.59  | 0.3956074 | 0 | 0            | 0 | -0.003640366 |
| cov3_4_7_8_9_10_11 | 36.5872 | -383.591 | 0.3953953 | 0 | 0            | 0 | 0            |
| cov1_2_4_5_6_10_11 | 36.5935 | -383.594 | 0.3941605 | 0 | -0.1030007   | 0 | 0.037576472  |
| cov1_2_6_7_8_10_11 | 36.5963 | -383.595 | 0.3964781 | 0 | -0.1584898   | 0 | 0.012405613  |
| cov1_2_4_5_6_9_10  | 36.6011 | -383.598 | 0.3939982 | 0 | -0.10017432  | 0 | 0.038928409  |
| cov1_2_4_5_6_8_10  | 36.6015 | -383.598 | 0.3937825 | 0 | -0.1010832   | 0 | 0.039743776  |
| cov1_2_4_5_6_7_10  | 36.6019 | -383.598 | 0.3940693 | 0 | -0.098467102 | 0 | 0.037930617  |
| cov1_2_6_7_8_9_10  | 36.6104 | -383.603 | 0.3964043 | 0 | -0.15350436  | 0 | 0.013384912  |
| cov1_6_7_8_9_10_11 | 36.619  | -383.607 | 0.3966151 | 0 | -0.14919     | 0 | 0            |
| cov1_2_3_6_7_9_11  | 36.626  | -383.61  | 0.4008535 | 0 | -0.17303706  | 0 | 0.008671886  |
| cov2_3_4_6_7_8_10  | 36.6319 | -383.613 | 0.3963341 | 0 | 0            | 0 | -0.004023067 |
| cov3_4_6_7_8_9_10  | 36.634  | -383.614 | 0.396138  | 0 | 0            | 0 | 0            |
| cov1_2_3_4_7_10_11 | 36.6368 | -383.616 | 0.3984701 | 0 | -0.10549097  | 0 | 0.034904798  |
| cov1_2_3_4_5_7_10  | 36.6509 | -383.623 | 0.3981323 | 0 | -0.08286123  | 0 | 0.031883714  |
| cov1_2_3_4_7_9_10  | 36.6511 | -383.623 | 0.3983981 | 0 | -0.098786489 | 0 | 0.03625438   |
| cov1_2_5_6_7_10_11 | 36.6817 | -383.638 | 0.3954128 | 0 | -0.082083286 | 0 | 0.017698816  |
| cov1_2_3_5_7_10_11 | 36.6825 | -383.639 | 0.3993709 | 0 | -0.075689254 | 0 | 0.01467096   |
| cov1_2_5_6_7_9_10  | 36.6887 | -383.642 | 0.3953418 | 0 | -0.078284015 | 0 | 0.018414607  |
| cov1_2_5_6_9_10_11 | 36.6892 | -383.642 | 0.3953132 | 0 | -0.08461639  | 0 | 0.017806678  |
| cov1_2_5_6_8_10_11 | 36.6917 | -383.643 | 0.3952635 | 0 | -0.084085925 | 0 | 0.017658833  |
| cov1_2_3_5_7_9_10  | 36.6984 | -383.646 | 0.3993005 | 0 | -0.068773036 | 0 | 0.015974071  |
| cov2_3_5_6_8_10_11 | 36.7043 | -383.649 | 0.3968679 | 0 | 0            | 0 | -0.006275341 |
| cov1_2_5_6_8_9_10  | 36.7047 | -383.65  | 0.3951564 | 0 | -0.079154483 | 0 | 0.018531831  |
| cov1_2_3_4_5_6_9   | 36.7072 | -383.651 | 0.3966721 | 0 | -0.11314539  | 0 | 0.027794859  |
| cov1_3_5_7_9_10_11 | 36.7092 | -383.652 | 0.3997375 | 0 | -0.067470544 | 0 | 0            |
| cov3_5_6_8_9_10_11 | 36.7103 | -383.652 | 0.3967329 | 0 | 0            | 0 | 0            |
| cov2_3_4_5_6_8_10  | 36.7111 | -383.653 | 0.3972474 | 0 | 0            | 0 | -0.010759883 |



|                    |         |          |           |   |              |              |
|--------------------|---------|----------|-----------|---|--------------|--------------|
| cov3_4_5_6_8_10_11 | 36.7116 | -383.653 | 0.3966578 | 0 | 0            | 0            |
| cov2_3_5_6_8_9_10  | 36.7142 | -383.654 | 0.3969683 | 0 | 0            | -0.007479115 |
| cov1_3_4_5_7_10_11 | 36.7164 | -383.655 | 0.3994431 | 0 | -0.067194328 | 0            |
| cov3_4_5_6_8_9_10  | 36.725  | -383.66  | 0.3967314 | 0 | 0            | 0            |
| cov1_4_5_6_7_10_11 | 36.7309 | -383.663 | 0.3953302 | 0 | -0.071129687 | 0            |
| cov1_5_6_7_9_10_11 | 36.7343 | -383.664 | 0.3955812 | 0 | -0.070128476 | 0            |
| cov1_4_5_6_9_10_11 | 36.7361 | -383.665 | 0.3952097 | 0 | -0.073372663 | 0            |
| cov1_4_5_6_8_10_11 | 36.7375 | -383.666 | 0.3951274 | 0 | -0.073475544 | 0            |
| cov1_3_4_5_7_9_10  | 36.7401 | -383.667 | 0.3993772 | 0 | -0.058330119 | 0            |
| cov1_4_5_6_7_9_10  | 36.7434 | -383.669 | 0.3952284 | 0 | -0.065740566 | 0            |
| cov1_5_6_8_9_10_11 | 36.7441 | -383.669 | 0.3954311 | 0 | -0.072159369 | 0            |
| cov1_2_3_5_6_9_11  | 36.7519 | -383.673 | 0.3977019 | 0 | -0.10213534  | 0.013522735  |
| cov1_4_5_6_8_9_10  | 36.7572 | -383.676 | 0.3949961 | 0 | -0.066847292 | 0            |
| cov1_3_4_7_9_10_11 | 36.7634 | -383.679 | 0.4001334 | 0 | -0.093621569 | 0            |
| cov1_3_4_6_9_10_11 | 36.7748 | -383.685 | 0.3985017 | 0 | -0.13457824  | 0            |
| cov1_3_4_5_6_9_11  | 36.7817 | -383.688 | 0.3976806 | 0 | -0.093200102 | 0            |
| cov2_3_5_6_7_10_11 | 36.7825 | -383.689 | 0.3966049 | 0 | 0            | -0.00429874  |
| cov3_5_6_7_9_10_11 | 36.7848 | -383.69  | 0.3965252 | 0 | 0            | 0            |
| cov3_4_5_6_7_10_11 | 36.786  | -383.69  | 0.396496  | 0 | 0            | 0            |
| cov1_2_3_7_9_10_11 | 36.7909 | -383.693 | 0.4010767 | 0 | -0.11634486  | 0.012356536  |
| cov2_3_4_5_6_7_10  | 36.7919 | -383.693 | 0.3969893 | 0 | 0            | -0.008902282 |
| cov1_2_3_4_8_9_11  | 36.7945 | -383.695 | 0.3985719 | 0 | -0.1066683   | 0.030248497  |
| cov2_3_5_6_7_9_10  | 36.7951 | -383.695 | 0.3967082 | 0 | 0            | -0.005639634 |
| cov3_4_5_6_7_9_10  | 36.8012 | -383.698 | 0.3965657 | 0 | 0            | 0            |
| cov1_2_6_7_8_9_11  | 36.8052 | -383.7   | 0.3963916 | 0 | -0.15689083  | 0.010854415  |
| cov2_3_4_7_8_9_10  | 36.807  | -383.701 | 0.3958259 | 0 | 0            | -0.017060293 |
| cov1_2_4_6_8_10_11 | 36.8132 | -383.704 | 0.3931332 | 0 | -0.15687464  | 0.059821512  |
| cov2_3_4_5_6_10_11 | 36.8242 | -383.709 | 0.3964117 | 0 | 0            | -0.003611124 |
| cov3_4_5_6_9_10_11 | 36.8247 | -383.71  | 0.3962784 | 0 | 0            | 0            |
| cov2_3_5_6_9_10_11 | 36.8253 | -383.71  | 0.3962165 | 0 | 0            | -0.001146445 |
| cov1_2_4_6_8_9_10  | 36.8254 | -383.71  | 0.3930229 | 0 | -0.15236754  | 0.060892971  |
| cov1_2_3_4_5_8_9   | 36.8389 | -383.717 | 0.3982656 | 0 | -0.09611952  | 0.031609093  |
| cov1_2_4_6_7_10_11 | 36.8394 | -383.717 | 0.3933433 | 0 | -0.15563511  | 0.05914671   |
| cov2_3_4_5_6_9_10  | 36.8394 | -383.717 | 0.3965793 | 0 | 0            | -0.005780397 |
| cov1_2_4_6_9_10_11 | 36.8451 | -383.72  | 0.3936125 | 0 | -0.15456328  | 0.058578756  |
| cov2_3_5_8_9_10_11 | 36.8457 | -383.72  | 0.3976397 | 0 | 0            | -0.001196408 |
| cov3_4_5_8_9_10_11 | 36.8458 | -383.72  | 0.3975588 | 0 | 0            | 0            |
| cov2_3_4_5_8_9_10  | 36.8459 | -383.72  | 0.3976231 | 0 | 0            | -0.001266763 |
| cov1_2_4_6_7_9_10  | 36.846  | -383.72  | 0.3932698 | 0 | -0.15208968  | 0.060022071  |
| cov1_2_3_4_6_9_11  | 36.8461 | -383.72  | 0.3965118 | 0 | -0.15205134  | 0.04211004   |
| cov3_4_6_7_8_9_11  | 36.8463 | -383.72  | 0.3956694 | 0 | 0            | 0            |
| cov2_3_4_5_8_10_11 | 36.8494 | -383.722 | 0.3975312 | 0 | 0            | -0.000844888 |
| cov1_2_3_5_8_9_11  | 36.8719 | -383.733 | 0.3997058 | 0 | -0.088888177 | 0.011704979  |
| cov1_3_4_5_8_9_11  | 36.8837 | -383.739 | 0.3995957 | 0 | -0.08286089  | 0            |
| cov2_3_4_7_8_9_11  | 36.9028 | -383.749 | 0.3953273 | 0 | 0            | -0.00572833  |
| cov1_2_7_8_9_10_11 | 36.9086 | -383.752 | 0.3964071 | 0 | -0.11232714  | 0.01376637   |
| cov1_2_3_4_5_9_10  | 36.9167 | -383.756 | 0.397029  | 0 | -0.048935508 | 0.028764987  |

|                    |         |          |           |   |              |   |              |
|--------------------|---------|----------|-----------|---|--------------|---|--------------|
| cov1_2_3_4_5_10_11 | 36.9201 | -383.757 | 0.3969766 | 0 | -0.050518648 | 0 | 0.028025466  |
| cov1_2_4_5_6_9_11  | 36.9245 | -383.76  | 0.3941299 | 0 | -0.10770344  | 0 | 0.035984336  |
| cov1_2_3_6_9_10_11 | 36.9255 | -383.76  | 0.4003123 | 0 | -0.162924    | 0 | 0.011800936  |
| cov2_3_4_6_7_8_9   | 36.9335 | -383.764 | 0.3960162 | 0 | 0            | 0 | -0.005692368 |
| cov1_2_4_5_6_7_9   | 36.9376 | -383.766 | 0.3940071 | 0 | -0.10235452  | 0 | 0.03651853   |
| cov1_2_4_5_6_8_9   | 36.9381 | -383.766 | 0.3937226 | 0 | -0.10497869  | 0 | 0.038329533  |
| cov2_3_6_7_8_10_11 | 36.9381 | -383.766 | 0.3997108 | 0 | 0            | 0 | -0.037162198 |
| cov1_2_3_5_9_10_11 | 36.9391 | -383.767 | 0.3978627 | 0 | -0.042800754 | 0 | 0.017335287  |
| cov2_3_5_7_9_10_11 | 36.9523 | -383.773 | 0.3974464 | 0 | 0            | 0 | 0.001296149  |
| cov2_3_4_5_7_9_10  | 36.9524 | -383.773 | 0.3973969 | 0 | 0            | 0 | 0.001501429  |
| cov3_4_5_7_9_10_11 | 36.9526 | -383.774 | 0.3974937 | 0 | 0            | 0 | 0            |
| cov2_3_4_5_7_10_11 | 36.9559 | -383.775 | 0.3972971 | 0 | 0            | 0 | 0.002013498  |
| cov2_4_5_6_7_10_11 | 36.9841 | -383.789 | 0.3944449 | 0 | 0            | 0 | 0.00502483   |
| cov1_2_3_4_7_9_11  | 36.9852 | -383.79  | 0.3983049 | 0 | -0.10448027  | 0 | 0.032082029  |
| cov2_5_6_7_9_10_11 | 36.9852 | -383.79  | 0.394647  | 0 | 0            | 0 | 0.003051367  |
| cov4_5_6_7_9_10_11 | 36.987  | -383.791 | 0.3946673 | 0 | 0            | 0 | 0            |
| cov2_4_5_6_7_9_10  | 36.988  | -383.791 | 0.3945795 | 0 | 0            | 0 | 0.003645497  |
| cov1_3_4_5_9_10_11 | 36.9905 | -383.793 | 0.3981149 | 0 | -0.030555467 | 0 | 0            |
| cov2_4_5_6_8_10_11 | 37.0079 | -383.801 | 0.3941977 | 0 | 0            | 0 | 0.005496702  |
| cov2_4_5_6_8_9_10  | 37.0095 | -383.802 | 0.3942953 | 0 | 0            | 0 | 0.004565337  |
| cov2_5_6_8_9_10_11 | 37.0109 | -383.803 | 0.3944749 | 0 | 0            | 0 | 0.002621709  |
| cov4_5_6_8_9_10_11 | 37.0115 | -383.803 | 0.3944354 | 0 | 0            | 0 | 0            |
| cov2_4_5_6_9_10_11 | 37.0127 | -383.804 | 0.3940326 | 0 | 0            | 0 | 0.005879429  |
| cov1_2_3_4_5_7_9   | 37.0147 | -383.805 | 0.3979748 | 0 | -0.086384696 | 0 | 0.03075923   |
| cov1_2_5_6_7_9_11  | 37.0205 | -383.808 | 0.3954289 | 0 | -0.086032744 | 0 | 0.015266942  |
| cov1_2_5_6_8_9_11  | 37.0309 | -383.813 | 0.3952788 | 0 | -0.088034087 | 0 | 0.015225363  |
| cov1_2_3_5_7_9_11  | 37.0462 | -383.82  | 0.3992939 | 0 | -0.079279487 | 0 | 0.012422911  |
| cov2_3_6_7_8_9_10  | 37.0467 | -383.821 | 0.4001292 | 0 | 0            | 0 | -0.042983563 |
| cov2_3_4_5_9_10_11 | 37.0479 | -383.821 | 0.3967834 | 0 | 0            | 0 | 0.008384787  |
| cov1_4_5_6_7_9_11  | 37.0506 | -383.823 | 0.3952262 | 0 | -0.077050014 | 0 | 0            |
| cov1_4_5_6_8_9_11  | 37.0564 | -383.825 | 0.3950232 | 0 | -0.079378916 | 0 | 0            |
| cov1_3_4_5_7_9_11  | 37.0653 | -383.83  | 0.3992462 | 0 | -0.072503595 | 0 | 0            |
| cov1_2_3_4_9_10_11 | 37.0811 | -383.838 | 0.3969303 | 0 | -0.094345823 | 0 | 0.04404772   |
| cov2_4_6_7_8_10_11 | 37.0915 | -383.843 | 0.3917929 | 0 | 0            | 0 | 0.023366515  |
| cov2_3_7_8_9_10_11 | 37.0929 | -383.844 | 0.3996809 | 0 | 0            | 0 | -0.051087795 |
| cov1_2_4_6_8_9_11  | 37.0932 | -383.844 | 0.393197  | 0 | -0.15546936  | 0 | 0.055980921  |
| cov1_2_4_6_7_9_11  | 37.1173 | -383.856 | 0.3933998 | 0 | -0.15422691  | 0 | 0.055320408  |
| cov2_3_5_6_8_9_11  | 37.1178 | -383.856 | 0.3966491 | 0 | 0            | 0 | -0.009093956 |
| cov2_3_4_5_6_8_9   | 37.1217 | -383.858 | 0.3969457 | 0 | 0            | 0 | -0.012631741 |
| cov2_4_7_8_9_10_11 | 37.1244 | -383.859 | 0.3915842 | 0 | 0            | 0 | 0.019059043  |
| cov3_4_5_6_8_9_11  | 37.1318 | -383.863 | 0.3962719 | 0 | 0            | 0 | 0            |
| cov4_6_7_8_9_10_11 | 37.1669 | -383.881 | 0.392581  | 0 | 0            | 0 | 0            |
| cov1_2_4_5_9_10_11 | 37.1682 | -383.881 | 0.3942967 | 0 | -0.043986358 | 0 | 0.037250286  |
| cov1_2_4_5_8_10_11 | 37.169  | -383.882 | 0.3940292 | 0 | -0.045745328 | 0 | 0.038181475  |
| cov1_2_4_5_7_10_11 | 37.172  | -383.883 | 0.3943003 | 0 | -0.041967846 | 0 | 0.036430354  |
| cov2_4_6_7_8_9_10  | 37.1787 | -383.887 | 0.3921269 | 0 | 0            | 0 | 0.017966915  |
| cov2_3_5_6_7_9_11  | 37.1864 | -383.89  | 0.3963825 | 0 | 0            | 0 | -0.007069405 |

|                    |         |          |           |   |              |   |              |
|--------------------|---------|----------|-----------|---|--------------|---|--------------|
| cov2_3_4_5_6_7_9   | 37.1924 | -383.893 | 0.3966836 | 0 | 0            | 0 | -0.010729008 |
| cov1_2_4_5_7_9_10  | 37.1933 | -383.894 | 0.3941726 | 0 | -0.034756257 | 0 | 0.037776937  |
| cov3_4_5_6_7_9_11  | 37.1952 | -383.895 | 0.3961058 | 0 | 0            | 0 | 0            |
| cov1_2_4_5_8_9_10  | 37.2003 | -383.897 | 0.3938633 | 0 | -0.037199306 | 0 | 0.039740001  |
| cov2_3_4_5_6_9_11  | 37.2155 | -383.905 | 0.3962129 | 0 | 0            | 0 | -0.006366253 |
| cov2_3_6_7_8_9_11  | 37.2365 | -383.916 | 0.3993658 | 0 | 0            | 0 | -0.038313518 |
| cov1_2_5_7_9_10_11 | 37.2375 | -383.916 | 0.395432  | 0 | -0.025426346 | 0 | 0.019124513  |
| cov3_6_7_8_9_10_11 | 37.2448 | -383.92  | 0.3992066 | 0 | 0            | 0 | 0            |
| cov2_3_4_5_8_9_11  | 37.2483 | -383.921 | 0.3972749 | 0 | 0            | 0 | -0.003559895 |
| cov1_2_5_8_9_10_11 | 37.2499 | -383.922 | 0.3952638 | 0 | -0.0274568   | 0 | 0.019082299  |
| cov1_4_6_8_9_10_11 | 37.2516 | -383.923 | 0.3948168 | 0 | -0.13000398  | 0 | 0            |
| cov1_2_3_4_5_9_11  | 37.2539 | -383.924 | 0.3968791 | 0 | -0.056201803 | 0 | 0.02687506   |
| cov2_4_5_7_9_10_11 | 37.2551 | -383.925 | 0.394487  | 0 | 0            | 0 | 0.019255528  |
| cov1_4_6_7_9_10_11 | 37.2678 | -383.931 | 0.3950124 | 0 | -0.1290181   | 0 | 0            |
| cov2_4_5_8_9_10_11 | 37.2687 | -383.932 | 0.3942241 | 0 | 0            | 0 | 0.019471948  |
| cov1_4_5_7_9_10_11 | 37.2996 | -383.947 | 0.3954692 | 0 | -0.012229259 | 0 | 0            |
| cov1_4_5_8_9_10_11 | 37.3098 | -383.952 | 0.3952509 | 0 | -0.014594513 | 0 | 0            |
| cov2_4_6_7_8_9_11  | 37.3409 | -383.968 | 0.3917798 | 0 | 0            | 0 | 0.020043801  |
| cov2_3_4_5_7_9_11  | 37.3437 | -383.969 | 0.397041  | 0 | 0            | 0 | -0.000657365 |
| cov2_4_5_6_7_9_11  | 37.3523 | -383.973 | 0.3943918 | 0 | 0            | 0 | 0.001785612  |
| cov1_2_4_8_9_10_11 | 37.3769 | -383.986 | 0.3933566 | 0 | -0.096586475 | 0 | 0.058719534  |
| cov2_4_5_6_8_9_11  | 37.3772 | -383.986 | 0.3941448 | 0 | 0            | 0 | 0.002251041  |
| cov1_2_4_7_9_10_11 | 37.4012 | -383.998 | 0.3935881 | 0 | -0.095331079 | 0 | 0.057993687  |
| cov1_2_4_5_8_9_11  | 37.4835 | -384.039 | 0.3940237 | 0 | -0.051415979 | 0 | 0.03671206   |
| cov1_2_4_5_7_9_11  | 37.4868 | -384.041 | 0.3942936 | 0 | -0.047654773 | 0 | 0.034964882  |
| cov2_3_4_6_8_10_11 | 37.7164 | -384.155 | 0.3968233 | 0 | 0            | 0 | -0.002696386 |
| cov3_4_6_8_9_10_11 | 37.7169 | -384.156 | 0.3967146 | 0 | 0            | 0 | 0            |
| cov1_2_6_7_9_10_11 | 37.7421 | -384.168 | 0.3972641 | 0 | -0.16983057  | 0 | 0.012597076  |
| cov1_2_6_8_9_10_11 | 37.7437 | -384.169 | 0.397103  | 0 | -0.17144576  | 0 | 0.012576166  |
| cov2_3_4_8_9_10_11 | 37.7489 | -384.172 | 0.3965561 | 0 | 0            | 0 | -0.006514562 |
| cov2_3_4_6_8_9_10  | 37.8266 | -384.211 | 0.3972179 | 0 | 0            | 0 | -0.008404785 |
| cov3_4_6_7_9_10_11 | 37.8716 | -384.233 | 0.3965428 | 0 | 0            | 0 | 0            |
| cov2_3_4_6_7_10_11 | 37.8719 | -384.233 | 0.3965369 | 0 | 0            | 0 | -0.000406176 |
| cov2_3_4_7_9_10_11 | 37.8976 | -384.246 | 0.396299  | 0 | 0            | 0 | -0.003823032 |
| cov2_3_4_6_7_9_10  | 37.9969 | -384.296 | 0.3969468 | 0 | 0            | 0 | -0.006489615 |
| cov2_3_4_6_8_9_11  | 38.0448 | -384.32  | 0.3965621 | 0 | 0            | 0 | -0.004990741 |
| cov2_3_4_6_9_10_11 | 38.1062 | -384.35  | 0.3953987 | 0 | 0            | 0 | 0.008247608  |
| cov2_3_6_8_9_10_11 | 38.1226 | -384.359 | 0.4005956 | 0 | 0            | 0 | -0.041176959 |
| cov2_3_4_6_7_9_11  | 38.1883 | -384.391 | 0.3962716 | 0 | 0            | 0 | -0.002639732 |
| cov2_6_7_8_9_10_11 | 38.257  | -384.426 | 0.3959978 | 0 | 0            | 0 | -0.033727385 |
| cov2_3_6_7_9_10_11 | 38.3158 | -384.455 | 0.4004982 | 0 | 0            | 0 | -0.040673729 |
| cov2_4_6_7_9_10_11 | 38.4317 | -384.513 | 0.3923635 | 0 | 0            | 0 | 0.021318347  |
| cov2_4_6_8_9_10_11 | 38.4341 | -384.514 | 0.3921343 | 0 | 0            | 0 | 0.021703124  |
| cov1_3_4_5_6_7_8   | 38.6048 | -384.6   | 0.4046445 | 0 | -0.19858078  | 0 | 0            |
| cov1_3_5_6_7_8_11  | 38.6226 | -384.609 | 0.4056707 | 0 | -0.20447648  | 0 | 0            |
| cov1_2_3_5_6_7_8   | 38.6631 | -384.629 | 0.4054151 | 0 | -0.19833289  | 0 | 0.004357746  |
| cov1_2_3_4_5_7_8   | 38.6633 | -384.629 | 0.4035899 | 0 | -0.18788244  | 0 | 0.029340282  |

|                      |         |          |           |   |              |   |              |
|----------------------|---------|----------|-----------|---|--------------|---|--------------|
| cov1_3_4_5_7_8_11    | 38.6871 | -384.641 | 0.4047842 | 0 | -0.17676965  | 0 | 0            |
| cov1_2_3_5_7_8_11    | 38.7383 | -384.666 | 0.4054733 | 0 | -0.17745736  | 0 | 0.004088128  |
| cov1_2_3_6_7_8_11    | 38.7548 | -384.675 | 0.4046347 | 0 | -0.17035465  | 0 | 0.005414443  |
| cov1_3_4_6_7_8_11    | 38.7598 | -384.677 | 0.4046814 | 0 | -0.16656842  | 0 | 0            |
| cov1_2_3_4_6_7_8     | 38.7929 | -384.694 | 0.4041693 | 0 | -0.16174926  | 0 | 0.008991646  |
| cov1_2_3_4_7_8_11    | 38.87   | -384.732 | 0.4043143 | 0 | -0.14095931  | 0 | 0.007802755  |
| cov1_2_4_5_6_7_8     | 38.9605 | -384.778 | 0.4000506 | 0 | -0.17783235  | 0 | 0.034647753  |
| cov1_2_4_6_7_8_11    | 38.9785 | -384.787 | 0.4011909 | 0 | -0.1627395   | 0 | 0.021808599  |
| cov1_4_5_6_7_8_11    | 39.0323 | -384.813 | 0.4012118 | 0 | -0.15713361  | 0 | 0            |
| cov1_2_4_5_7_8_11    | 39.0575 | -384.826 | 0.4001721 | 0 | -0.15273982  | 0 | 0.032932315  |
| cov1_2_5_6_7_8_11    | 39.0783 | -384.836 | 0.4020005 | 0 | -0.15952428  | 0 | 0.007204749  |
| cov1_2_3_4_5_6_8     | 39.4625 | -385.029 | 0.4045491 | 0 | -0.24240734  | 0 | 0.031051617  |
| cov1_3_4_5_6_8_11    | 39.4985 | -385.047 | 0.4058122 | 0 | -0.22770294  | 0 | 0            |
| cov1_2_3_5_6_8_11    | 39.5772 | -385.086 | 0.4066931 | 0 | -0.22548117  | 0 | 0.002578772  |
| cov1_2_3_4_5_6_7     | 39.6108 | -385.103 | 0.4042985 | 0 | -0.23364333  | 0 | 0.030270141  |
| cov1_2_3_4_5_8_11    | 39.6342 | -385.114 | 0.4047787 | 0 | -0.2102259   | 0 | 0.029066258  |
| cov1_3_4_5_6_7_11    | 39.6531 | -385.124 | 0.4055095 | 0 | -0.21856576  | 0 | 0            |
| cov1_2_3_5_6_7_11    | 39.72   | -385.157 | 0.4063193 | 0 | -0.21693288  | 0 | 0.003251558  |
| cov1_2_3_4_6_8_11    | 39.7675 | -385.181 | 0.4054233 | 0 | -0.18236099  | 0 | 0.006103131  |
| cov1_2_3_4_5_7_11    | 39.8004 | -385.197 | 0.404477  | 0 | -0.19937035  | 0 | 0.028416933  |
| cov1_2_3_4_5_6_11    | 39.8077 | -385.201 | 0.4033674 | 0 | -0.20376029  | 0 | 0.02645803   |
| cov1_2_3_4_6_7_11    | 39.8479 | -385.221 | 0.405039  | 0 | -0.18014823  | 0 | 0.008222962  |
| cov1_2_4_5_6_8_11    | 40.0235 | -385.309 | 0.4005698 | 0 | -0.19948483  | 0 | 0.035717255  |
| cov1_2_4_5_6_7_11    | 40.0237 | -385.309 | 0.40084   | 0 | -0.19577976  | 0 | 0.034103032  |
| cov2_3_4_5_6_7_8     | 40.3198 | -385.457 | 0.4037827 | 0 | 0            | 0 | -0.037873918 |
| cov2_3_5_6_7_8_11    | 40.3263 | -385.46  | 0.4029781 | 0 | 0            | 0 | -0.028459031 |
| cov2_4_5_6_7_8_11    | 40.3266 | -385.461 | 0.4027969 | 0 | 0            | 0 | -0.031723781 |
| cov2_3_4_5_7_8_11    | 40.463  | -385.529 | 0.403676  | 0 | 0            | 0 | -0.046641712 |
| cov3_4_5_6_7_8_11    | 40.4676 | -385.531 | 0.4021362 | 0 | 0            | 0 | 0            |
| cov2_3_4_6_7_8_11    | 40.6079 | -385.601 | 0.4029962 | 0 | 0            | 0 | -0.030574916 |
| cov2_3_4_5_6_7_11    | 41.5809 | -386.088 | 0.4042941 | 0 | 0            | 0 | -0.0382743   |
| cov2_3_4_5_6_8_11    | 41.6109 | -386.103 | 0.4046924 | 0 | 0            | 0 | -0.040961766 |
| cov1_2_3_4_6_7_8_10  | 41.9864 | -382.776 | 0.397556  | 0 | -0.15252795  | 0 | 0.036326248  |
| cov1_2_3_5_6_7_8_10  | 42.0385 | -382.802 | 0.3985557 | 0 | -0.11816922  | 0 | 0.014053677  |
| cov1_3_5_6_7_8_10_11 | 42.0606 | -382.813 | 0.398876  | 0 | -0.11395932  | 0 | 0            |
| cov1_3_5_6_7_8_9_10  | 42.066  | -382.816 | 0.398844  | 0 | -0.10969034  | 0 | 0            |
| cov1_3_4_5_6_7_8_10  | 42.0667 | -382.816 | 0.3985152 | 0 | -0.11021548  | 0 | 0            |
| cov1_3_4_6_7_8_10_11 | 42.1218 | -382.844 | 0.3992238 | 0 | -0.14261748  | 0 | 0            |
| cov1_3_4_6_7_8_9_10  | 42.1295 | -382.848 | 0.3991992 | 0 | -0.1379679   | 0 | 0            |
| cov1_2_3_6_7_8_10_11 | 42.1809 | -382.873 | 0.4004111 | 0 | -0.16453687  | 0 | 0.010585588  |
| cov1_2_3_6_7_8_9_10  | 42.1817 | -382.874 | 0.400403  | 0 | -0.16096534  | 0 | 0.011480606  |
| cov1_3_6_7_8_9_10_11 | 42.1908 | -382.878 | 0.4006199 | 0 | -0.15677067  | 0 | 0            |
| cov1_2_3_4_6_7_8_9   | 42.3573 | -382.961 | 0.3973224 | 0 | -0.14946919  | 0 | 0.03355728   |
| cov1_2_3_4_7_8_10_11 | 42.3871 | -382.976 | 0.3977615 | 0 | -0.10402567  | 0 | 0.034537479  |
| cov1_2_3_4_5_7_8_10  | 42.3946 | -382.98  | 0.3974359 | 0 | -0.08105065  | 0 | 0.031110583  |
| cov1_2_3_4_7_8_9_10  | 42.398  | -382.982 | 0.3977033 | 0 | -0.097947245 | 0 | 0.035772952  |
| cov1_2_3_5_7_8_10_11 | 42.4272 | -382.996 | 0.3986177 | 0 | -0.073658686 | 0 | 0.014513793  |

|                      |         |          |           |   |              |   |              |
|----------------------|---------|----------|-----------|---|--------------|---|--------------|
| cov1_2_3_5_6_7_8_9   | 42.4273 | -382.996 | 0.3984087 | 0 | -0.11955603  | 0 | 0.011839686  |
| cov1_3_5_6_7_8_9_11  | 42.4343 | -383     | 0.398717  | 0 | -0.11768028  | 0 | 0            |
| cov1_2_3_5_7_8_9_10  | 42.4396 | -383.003 | 0.3985628 | 0 | -0.067464167 | 0 | 0.015683437  |
| cov1_3_4_5_6_7_8_9   | 42.4399 | -383.003 | 0.3982493 | 0 | -0.11347114  | 0 | 0            |
| cov1_3_5_7_8_9_10_11 | 42.4541 | -383.01  | 0.3989716 | 0 | -0.065478402 | 0 | 0            |
| cov1_3_4_5_7_8_10_11 | 42.4609 | -383.013 | 0.3986958 | 0 | -0.065190791 | 0 | 0            |
| cov1_3_4_6_7_8_9_11  | 42.4657 | -383.016 | 0.3988867 | 0 | -0.14158738  | 0 | 0            |
| cov1_3_4_5_7_8_9_10  | 42.4804 | -383.023 | 0.39864   | 0 | -0.05707583  | 0 | 0            |
| cov1_2_4_5_6_7_8_10  | 42.5029 | -383.034 | 0.3934495 | 0 | -0.087673601 | 0 | 0.037087698  |
| cov1_3_4_7_8_9_10_11 | 42.512  | -383.039 | 0.3993967 | 0 | -0.092246137 | 0 | 0            |
| cov1_2_3_6_7_8_9_11  | 42.5315 | -383.048 | 0.4001206 | 0 | -0.16217558  | 0 | 0.008715607  |
| cov1_2_3_7_8_9_10_11 | 42.54   | -383.053 | 0.4003408 | 0 | -0.11475974  | 0 | 0.01215319   |
| cov1_2_5_6_7_8_10_11 | 42.5761 | -383.071 | 0.3947255 | 0 | -0.071971257 | 0 | 0.017685402  |
| cov1_2_5_6_7_8_9_10  | 42.5827 | -383.074 | 0.3946594 | 0 | -0.068295912 | 0 | 0.018379022  |
| cov2_3_5_6_7_8_10_11 | 42.586  | -383.076 | 0.3960952 | 0 | 0            | 0 | -0.002781775 |
| cov3_5_6_7_8_9_10_11 | 42.5861 | -383.076 | 0.3960631 | 0 | 0            | 0 | 0            |
| cov3_4_5_6_7_8_10_11 | 42.5875 | -383.076 | 0.3960333 | 0 | 0            | 0 | 0            |
| cov2_3_4_5_6_7_8_10  | 42.594  | -383.08  | 0.3963899 | 0 | 0            | 0 | -0.00641879  |
| cov2_3_5_6_7_8_9_10  | 42.5952 | -383.08  | 0.3961924 | 0 | 0            | 0 | -0.003944418 |
| cov3_4_5_6_7_8_9_10  | 42.5982 | -383.082 | 0.3961024 | 0 | 0            | 0 | 0            |
| cov1_4_5_6_7_8_10_11 | 42.6266 | -383.096 | 0.3946713 | 0 | -0.060875957 | 0 | 0            |
| cov1_5_6_7_8_9_10_11 | 42.6288 | -383.097 | 0.3948937 | 0 | -0.060023904 | 0 | 0            |
| cov1_4_5_6_7_8_9_10  | 42.6383 | -383.102 | 0.3945805 | 0 | -0.055641042 | 0 | 0            |
| cov2_3_5_7_8_9_10_11 | 42.6833 | -383.124 | 0.3967339 | 0 | 0            | 0 | 0.00150004   |
| cov3_4_5_7_8_9_10_11 | 42.6837 | -383.125 | 0.3967963 | 0 | 0            | 0 | 0            |
| cov2_3_4_5_7_8_9_10  | 42.6839 | -383.125 | 0.3967004 | 0 | 0            | 0 | 0.001404093  |
| cov2_3_4_5_7_8_10_11 | 42.6865 | -383.126 | 0.3965974 | 0 | 0            | 0 | 0.002141828  |
| cov1_2_3_4_7_8_9_11  | 42.7388 | -383.152 | 0.3975864 | 0 | -0.10296552  | 0 | 0.031701178  |
| cov1_2_4_6_7_8_10_11 | 42.7442 | -383.155 | 0.3927275 | 0 | -0.1450681   | 0 | 0.058458056  |
| cov1_2_4_6_7_8_9_10  | 42.7504 | -383.158 | 0.3926588 | 0 | -0.14162652  | 0 | 0.059308709  |
| cov1_2_3_4_5_7_8_9   | 42.762  | -383.164 | 0.397268  | 0 | -0.084501698 | 0 | 0.02997203   |
| cov1_2_3_5_7_8_9_11  | 42.7948 | -383.18  | 0.3985308 | 0 | -0.077187339 | 0 | 0.012244746  |
| cov2_4_5_6_7_8_10_11 | 42.8058 | -383.186 | 0.3937729 | 0 | 0            | 0 | 0.007729347  |
| cov2_4_5_6_7_8_9_10  | 42.8079 | -383.187 | 0.393885  | 0 | 0            | 0 | 0.00665739   |
| cov2_5_6_7_8_9_10_11 | 42.8086 | -383.187 | 0.39405   | 0 | 0            | 0 | 0.004903152  |
| cov4_5_6_7_8_9_10_11 | 42.8133 | -383.189 | 0.3941009 | 0 | 0            | 0 | 0            |
| cov1_3_4_5_7_8_9_11  | 42.8139 | -383.19  | 0.3984895 | 0 | -0.070464214 | 0 | 0            |
| cov1_2_4_5_6_7_8_9   | 42.8397 | -383.203 | 0.3933847 | 0 | -0.091557314 | 0 | 0.035671069  |
| cov1_2_3_4_6_8_10_11 | 42.9019 | -383.234 | 0.3985989 | 0 | -0.16813808  | 0 | 0.034506447  |
| cov1_2_3_4_6_8_9_10  | 42.9067 | -383.236 | 0.3985524 | 0 | -0.16423019  | 0 | 0.035479446  |
| cov1_2_4_5_7_8_10_11 | 42.9082 | -383.237 | 0.3935945 | 0 | -0.040105217 | 0 | 0.035755411  |
| cov1_2_3_4_5_6_8_10  | 42.9114 | -383.238 | 0.3983701 | 0 | -0.15540499  | 0 | 0.033007703  |
| cov1_2_5_6_7_8_9_11  | 42.9158 | -383.241 | 0.3947388 | 0 | -0.075915604 | 0 | 0.015247794  |
| cov1_2_4_5_7_8_9_10  | 42.9257 | -383.246 | 0.3935112 | 0 | -0.033454078 | 0 | 0.036918652  |
| cov1_4_5_6_7_8_9_11  | 42.9477 | -383.257 | 0.3945652 | 0 | -0.066805583 | 0 | 0            |
| cov1_2_5_7_8_9_10_11 | 42.9702 | -383.268 | 0.3947152 | 0 | -0.023947032 | 0 | 0.01889993   |
| cov1_2_3_5_6_8_10_11 | 42.9834 | -383.274 | 0.3997962 | 0 | -0.14103736  | 0 | 0.012838629  |

|                      |         |          |           |   |              |   |              |
|----------------------|---------|----------|-----------|---|--------------|---|--------------|
| cov2_4_5_7_8_9_10_11 | 42.984  | -383.275 | 0.3937964 | 0 | 0            | 0 | 0.01931585   |
| cov2_3_5_6_7_8_9_11  | 42.9889 | -383.277 | 0.3958731 | 0 | 0            | 0 | -0.005544482 |
| cov1_2_3_5_6_8_9_10  | 42.9896 | -383.278 | 0.3997521 | 0 | -0.13693428  | 0 | 0.013776541  |
| cov2_3_4_5_6_7_8_9   | 42.9936 | -383.28  | 0.3960877 | 0 | 0            | 0 | -0.008246818 |
| cov3_4_5_6_7_8_9_11  | 42.9941 | -383.28  | 0.3956444 | 0 | 0            | 0 | 0            |
| cov1_3_4_5_6_8_10_11 | 42.9997 | -383.283 | 0.3996829 | 0 | -0.13510717  | 0 | 0            |
| cov1_3_5_6_8_9_10_11 | 43.0044 | -383.285 | 0.4000913 | 0 | -0.13384951  | 0 | 0            |
| cov1_3_4_5_6_8_9_10  | 43.0118 | -383.289 | 0.3996244 | 0 | -0.12944506  | 0 | 0            |
| cov1_2_4_6_7_8_9_11  | 43.0229 | -383.294 | 0.3927868 | 0 | -0.14365736  | 0 | 0.054627384  |
| cov1_3_4_6_8_9_10_11 | 43.0291 | -383.297 | 0.4002057 | 0 | -0.15546429  | 0 | 0            |
| cov1_4_5_7_8_9_10_11 | 43.0312 | -383.298 | 0.3947638 | 0 | -0.010877196 | 0 | 0            |
| cov2_3_4_5_7_8_9_11  | 43.0771 | -383.321 | 0.3963331 | 0 | 0            | 0 | -0.000528282 |
| cov1_2_3_6_8_9_10_11 | 43.0785 | -383.322 | 0.4013367 | 0 | -0.17669852  | 0 | 0.010716903  |
| cov1_2_3_4_5_6_7_10  | 43.0858 | -383.326 | 0.3981153 | 0 | -0.14710243  | 0 | 0.032235019  |
| cov1_2_3_4_6_7_10_11 | 43.093  | -383.329 | 0.3983558 | 0 | -0.16679893  | 0 | 0.036160906  |
| cov1_2_3_4_6_7_9_10  | 43.0936 | -383.33  | 0.3983408 | 0 | -0.16372142  | 0 | 0.036965269  |
| cov1_2_4_7_8_9_10_11 | 43.1434 | -383.354 | 0.3929095 | 0 | -0.093891278 | 0 | 0.057463515  |
| cov1_2_3_5_6_7_10_11 | 43.1521 | -383.359 | 0.3994241 | 0 | -0.13293076  | 0 | 0.013473815  |
| cov1_2_3_5_6_7_9_10  | 43.1539 | -383.36  | 0.3994081 | 0 | -0.12973149  | 0 | 0.01426625   |
| cov1_4_6_7_8_9_10_11 | 43.1632 | -383.364 | 0.3943699 | 0 | -0.11871147  | 0 | 0            |
| cov2_4_5_6_7_8_9_11  | 43.1713 | -383.368 | 0.3937185 | 0 | 0            | 0 | 0.004506732  |
| cov1_3_4_5_6_7_10_11 | 43.1751 | -383.37  | 0.3993642 | 0 | -0.12632129  | 0 | 0            |
| cov1_3_5_6_7_9_10_11 | 43.1768 | -383.371 | 0.3997206 | 0 | -0.12534397  | 0 | 0            |
| cov1_3_4_5_6_7_9_10  | 43.182  | -383.374 | 0.3993355 | 0 | -0.12166064  | 0 | 0            |
| cov1_2_4_5_7_8_9_11  | 43.2269 | -383.396 | 0.3936118 | 0 | -0.045682357 | 0 | 0.034203761  |
| cov1_3_4_6_7_9_10_11 | 43.2339 | -383.4   | 0.4000341 | 0 | -0.15356331  | 0 | 0            |
| cov1_2_3_4_6_8_9_11  | 43.2793 | -383.422 | 0.3984058 | 0 | -0.16603155  | 0 | 0.031534571  |
| cov1_2_3_6_7_9_10_11 | 43.2942 | -383.43  | 0.4012742 | 0 | -0.17599815  | 0 | 0.010848762  |
| cov1_2_3_4_5_6_8_9   | 43.2986 | -383.432 | 0.3981739 | 0 | -0.15792951  | 0 | 0.031812448  |
| cov1_3_4_5_6_8_9_11  | 43.3724 | -383.469 | 0.3994466 | 0 | -0.13947798  | 0 | 0            |
| cov1_2_3_5_6_8_9_11  | 43.3734 | -383.469 | 0.3996906 | 0 | -0.14354732  | 0 | 0.010491424  |
| cov1_2_3_4_5_6_9_10  | 43.3806 | -383.473 | 0.3969343 | 0 | -0.10977585  | 0 | 0.028907562  |
| cov1_2_3_4_5_6_10_11 | 43.3852 | -383.475 | 0.3968319 | 0 | -0.10916589  | 0 | 0.028817628  |
| cov1_2_3_5_6_9_10_11 | 43.4185 | -383.492 | 0.3978488 | 0 | -0.098911275 | 0 | 0.016110691  |
| cov1_2_3_4_8_9_10_11 | 43.4499 | -383.508 | 0.3989    | 0 | -0.10868291  | 0 | 0.033259064  |
| cov1_2_3_4_6_7_9_11  | 43.4588 | -383.512 | 0.3981572 | 0 | -0.164646    | 0 | 0.033241384  |
| cov1_2_3_4_5_8_10_11 | 43.4604 | -383.513 | 0.3986985 | 0 | -0.10164151  | 0 | 0.031383339  |
| cov1_3_4_5_6_9_10_11 | 43.4634 | -383.514 | 0.3979689 | 0 | -0.088070006 | 0 | 0            |
| cov1_2_3_4_5_6_7_9   | 43.4656 | -383.516 | 0.3979112 | 0 | -0.14948335  | 0 | 0.03103859   |
| cov1_2_3_4_5_8_9_10  | 43.4826 | -383.524 | 0.3985958 | 0 | -0.094107041 | 0 | 0.032968384  |
| cov1_2_3_5_8_9_10_11 | 43.517  | -383.541 | 0.3999449 | 0 | -0.086659585 | 0 | 0.014268331  |
| cov1_2_3_5_6_7_9_11  | 43.5351 | -383.55  | 0.3993104 | 0 | -0.13531114  | 0 | 0.011140839  |
| cov1_3_4_5_6_7_9_11  | 43.5418 | -383.554 | 0.3991273 | 0 | -0.13056796  | 0 | 0            |
| cov1_3_4_5_8_9_10_11 | 43.5463 | -383.556 | 0.3999518 | 0 | -0.078578063 | 0 | 0            |
| cov3_4_6_7_8_9_10_11 | 43.555  | -383.56  | 0.3960787 | 0 | 0            | 0 | 0            |
| cov2_3_4_6_7_8_10_11 | 43.5551 | -383.56  | 0.3959682 | 0 | 0            | 0 | 0.001553074  |
| cov1_2_3_4_6_9_10_11 | 43.565  | -383.565 | 0.3967212 | 0 | -0.15370162  | 0 | 0.045484704  |

|                      |         |          |           |   |              |   |              |
|----------------------|---------|----------|-----------|---|--------------|---|--------------|
| cov2_3_4_7_8_9_10_11 | 43.6146 | -383.59  | 0.3956114 | 0 | 0            | 0 | -0.003642567 |
| cov1_2_4_5_6_8_10_11 | 43.6165 | -383.591 | 0.3939576 | 0 | -0.10592311  | 0 | 0.038889841  |
| cov1_2_4_5_6_9_10_11 | 43.6202 | -383.593 | 0.3942225 | 0 | -0.10332731  | 0 | 0.037681225  |
| cov1_2_6_7_8_9_10_11 | 43.6204 | -383.593 | 0.3965622 | 0 | -0.15890361  | 0 | 0.012623195  |
| cov1_2_4_5_6_7_10_11 | 43.6223 | -383.594 | 0.3942073 | 0 | -0.10229581  | 0 | 0.037266086  |
| cov1_2_4_5_6_8_9_10  | 43.6279 | -383.597 | 0.393848  | 0 | -0.10150897  | 0 | 0.039866133  |
| cov1_2_4_5_6_7_9_10  | 43.6282 | -383.597 | 0.3941353 | 0 | -0.098895269 | 0 | 0.038054544  |
| cov1_2_3_4_5_7_10_11 | 43.6527 | -383.609 | 0.3983801 | 0 | -0.090916867 | 0 | 0.030713557  |
| cov1_2_3_4_7_9_10_11 | 43.6536 | -383.61  | 0.3986348 | 0 | -0.10647836  | 0 | 0.035033028  |
| cov2_3_4_6_7_8_9_10  | 43.661  | -383.613 | 0.3963443 | 0 | 0            | 0 | -0.004030686 |
| cov1_2_3_4_5_7_9_10  | 43.6673 | -383.616 | 0.3983108 | 0 | -0.084401734 | 0 | 0.032116989  |
| cov1_2_3_5_7_9_10_11 | 43.6997 | -383.633 | 0.3995351 | 0 | -0.077108445 | 0 | 0.014957349  |
| cov1_2_5_6_7_9_10_11 | 43.7081 | -383.637 | 0.3954755 | 0 | -0.082471705 | 0 | 0.017851688  |
| cov1_2_5_6_8_9_10_11 | 43.7182 | -383.642 | 0.3953251 | 0 | -0.084470215 | 0 | 0.017810267  |
| cov2_3_4_5_6_8_10_11 | 43.7307 | -383.648 | 0.3971284 | 0 | 0            | 0 | -0.008996774 |
| cov2_3_5_6_8_9_10_11 | 43.7321 | -383.649 | 0.3969126 | 0 | 0            | 0 | -0.006231302 |
| cov1_3_4_5_7_9_10_11 | 43.7353 | -383.65  | 0.3996055 | 0 | -0.068291693 | 0 | 0            |
| cov1_2_3_4_5_6_9_11  | 43.7357 | -383.651 | 0.3967026 | 0 | -0.11387015  | 0 | 0.027593885  |
| cov2_3_4_5_6_8_9_10  | 43.7391 | -383.652 | 0.3972963 | 0 | 0            | 0 | -0.010799229 |
| cov3_4_5_6_8_9_10_11 | 43.7393 | -383.652 | 0.3967094 | 0 | 0            | 0 | 0            |
| cov1_4_5_6_7_9_10_11 | 43.7584 | -383.662 | 0.3953854 | 0 | -0.071350837 | 0 | 0            |
| cov1_4_5_6_8_9_10_11 | 43.7651 | -383.665 | 0.395179  | 0 | -0.073670984 | 0 | 0            |
| cov2_3_4_5_6_7_10_11 | 43.8092 | -383.687 | 0.3968596 | 0 | 0            | 0 | -0.006924356 |
| cov2_3_5_6_7_9_10_11 | 43.8104 | -383.688 | 0.3966489 | 0 | 0            | 0 | -0.004254302 |
| cov3_4_5_6_7_9_10_11 | 43.8138 | -383.69  | 0.3965445 | 0 | 0            | 0 | 0            |
| cov2_3_4_5_6_7_9_10  | 43.82   | -383.693 | 0.3970359 | 0 | 0            | 0 | -0.008939629 |
| cov1_2_3_4_5_8_9_11  | 43.8235 | -383.695 | 0.3985761 | 0 | -0.10599263  | 0 | 0.030023066  |
| cov1_2_4_6_8_9_10_11 | 43.8394 | -383.702 | 0.3931984 | 0 | -0.15720133  | 0 | 0.05993668   |
| cov2_3_4_5_6_9_10_11 | 43.8522 | -383.709 | 0.3964604 | 0 | 0            | 0 | -0.003622088 |
| cov1_2_4_6_7_9_10_11 | 43.8655 | -383.715 | 0.393408  | 0 | -0.15595408  | 0 | 0.059255697  |
| cov2_3_4_5_8_9_10_11 | 43.8748 | -383.72  | 0.3976146 | 0 | 0            | 0 | -0.000951363 |
| cov2_3_4_6_7_8_9_11  | 43.8753 | -383.72  | 0.395705  | 0 | 0            | 0 | -0.000697753 |
| cov1_2_3_4_5_9_10_11 | 43.9411 | -383.753 | 0.3970718 | 0 | -0.051520411 | 0 | 0.028240512  |
| cov1_2_4_5_6_8_9_11  | 43.9473 | -383.756 | 0.3939241 | 0 | -0.11067199  | 0 | 0.03732045   |
| cov1_2_4_5_6_7_9_11  | 43.9533 | -383.759 | 0.3941656 | 0 | -0.10706167  | 0 | 0.03568998   |
| cov2_3_6_7_8_9_10_11 | 43.9656 | -383.766 | 0.3997621 | 0 | 0            | 0 | -0.037112233 |
| cov2_3_4_5_7_9_10_11 | 43.9812 | -383.773 | 0.3973819 | 0 | 0            | 0 | 0.001904756  |
| cov1_2_3_4_5_7_9_11  | 44.0091 | -383.787 | 0.3982446 | 0 | -0.095370855 | 0 | 0.029445523  |
| cov2_4_5_6_7_9_10_11 | 44.0127 | -383.789 | 0.3944743 | 0 | 0            | 0 | 0.005032286  |
| cov2_4_5_6_8_9_10_11 | 44.0365 | -383.801 | 0.3942244 | 0 | 0            | 0 | 0.005503246  |
| cov2_4_6_7_8_9_10_11 | 44.1206 | -383.843 | 0.3917885 | 0 | 0            | 0 | 0.02336392   |
| cov2_3_4_5_6_8_9_11  | 44.1452 | -383.855 | 0.3968611 | 0 | 0            | 0 | -0.011286156 |
| cov1_2_4_5_8_9_10_11 | 44.193  | -383.879 | 0.3941175 | 0 | -0.046412507 | 0 | 0.038365249  |
| cov1_2_4_5_7_9_10_11 | 44.1959 | -383.881 | 0.3943782 | 0 | -0.042717014 | 0 | 0.036648452  |
| cov2_3_4_5_6_7_9_11  | 44.2139 | -383.89  | 0.3965873 | 0 | 0            | 0 | -0.009168964 |
| cov2_3_4_6_8_9_10_11 | 44.7451 | -384.155 | 0.3968525 | 0 | 0            | 0 | -0.002700517 |
| cov2_3_4_6_7_9_10_11 | 44.9007 | -384.233 | 0.3965634 | 0 | 0            | 0 | -0.000412246 |

|                        |         |          |           |   |              |   |              |
|------------------------|---------|----------|-----------|---|--------------|---|--------------|
| cov1_2_3_4_5_6_7_8     | 45.5482 | -384.557 | 0.4037014 | 0 | -0.22276248  | 0 | 0.029492798  |
| cov1_3_4_5_6_7_8_11    | 45.5873 | -384.576 | 0.4048744 | 0 | -0.20816355  | 0 | 0            |
| cov1_2_3_4_5_7_8_11    | 45.6407 | -384.603 | 0.4038732 | 0 | -0.19841747  | 0 | 0.027739607  |
| cov1_2_3_5_6_7_8_11    | 45.6499 | -384.608 | 0.4056514 | 0 | -0.20663416  | 0 | 0.003254161  |
| cov1_2_3_4_6_7_8_11    | 45.7822 | -384.674 | 0.4044179 | 0 | -0.16963717  | 0 | 0.007630888  |
| cov1_2_4_5_6_7_8_11    | 45.952  | -384.759 | 0.4002731 | 0 | -0.18529071  | 0 | 0.033277993  |
| cov1_2_3_4_5_6_8_11    | 46.4425 | -385.004 | 0.4048352 | 0 | -0.25085979  | 0 | 0.029467556  |
| cov1_2_3_4_5_6_7_11    | 46.6006 | -385.083 | 0.4045549 | 0 | -0.2413064   | 0 | 0.028860704  |
| cov2_3_4_5_6_7_8_11    | 47.336  | -385.451 | 0.403656  | 0 | 0            | 0 | -0.035795075 |
| cov1_2_3_4_5_6_7_8_10  | 48.9977 | -382.767 | 0.3974596 | 0 | -0.13584522  | 0 | 0.031458408  |
| cov1_2_3_4_6_7_8_10_11 | 49.007  | -382.772 | 0.3977018 | 0 | -0.1561912   | 0 | 0.035625563  |
| cov1_2_3_4_6_7_8_9_10  | 49.0074 | -382.772 | 0.3976919 | 0 | -0.15321776  | 0 | 0.036408039  |
| cov1_2_3_5_6_7_8_10_11 | 49.0582 | -382.797 | 0.3987004 | 0 | -0.1223028   | 0 | 0.013506835  |
| cov1_2_3_5_6_7_8_9_10  | 49.0597 | -382.798 | 0.3986894 | 0 | -0.11922365  | 0 | 0.014277559  |
| cov1_3_4_5_6_7_8_10_11 | 49.083  | -382.81  | 0.3986698 | 0 | -0.11550614  | 0 | 0            |
| cov1_3_5_6_7_8_9_10_11 | 49.0833 | -382.81  | 0.3989968 | 0 | -0.11468629  | 0 | 0            |
| cov1_3_4_5_6_7_8_9_10  | 49.0893 | -382.813 | 0.398645  | 0 | -0.11099622  | 0 | 0            |
| cov1_3_4_6_7_8_9_10_11 | 49.1439 | -382.84  | 0.3993516 | 0 | -0.14312922  | 0 | 0            |
| cov1_2_3_6_7_8_9_10_11 | 49.1993 | -382.868 | 0.4005441 | 0 | -0.16513578  | 0 | 0.010892966  |
| cov1_2_3_4_6_7_8_9_11  | 49.3732 | -382.955 | 0.3974989 | 0 | -0.15403238  | 0 | 0.032706904  |
| cov1_2_3_4_5_6_7_8_9   | 49.3783 | -382.957 | 0.3972519 | 0 | -0.13821015  | 0 | 0.030258399  |
| cov1_2_3_4_5_7_8_10_11 | 49.401  | -382.969 | 0.3976622 | 0 | -0.088401738 | 0 | 0.03004494   |
| cov1_2_3_4_7_8_9_10_11 | 49.405  | -382.971 | 0.3979194 | 0 | -0.10496858  | 0 | 0.034659801  |
| cov1_2_3_4_5_7_8_9_10  | 49.4123 | -382.974 | 0.3976017 | 0 | -0.082546559 | 0 | 0.031324811  |
| cov1_2_3_5_6_7_8_9_11  | 49.4418 | -382.989 | 0.3985828 | 0 | -0.12466899  | 0 | 0.011170492  |
| cov1_2_3_5_7_8_9_10_11 | 49.4455 | -382.991 | 0.398774  | 0 | -0.075008027 | 0 | 0.014787254  |
| cov1_3_4_5_6_7_8_9_11  | 49.4508 | -382.994 | 0.3984285 | 0 | -0.1197497   | 0 | 0            |
| cov1_3_4_5_7_8_9_10_11 | 49.4807 | -383.009 | 0.3988507 | 0 | -0.066228298 | 0 | 0            |
| cov1_2_4_5_6_7_8_10_11 | 49.5238 | -383.03  | 0.3935806 | 0 | -0.091448002 | 0 | 0.036480034  |
| cov1_2_4_5_6_7_8_9_10  | 49.5294 | -383.033 | 0.3935128 | 0 | -0.088092306 | 0 | 0.037206227  |
| cov1_2_5_6_7_8_9_10_11 | 49.6027 | -383.07  | 0.3947871 | 0 | -0.072350441 | 0 | 0.017834409  |
| cov2_3_4_5_6_7_8_10_11 | 49.6138 | -383.075 | 0.3962785 | 0 | 0            | 0 | -0.004680835 |
| cov2_3_5_6_7_8_9_10_11 | 49.6138 | -383.075 | 0.3961421 | 0 | 0            | 0 | -0.002735875 |
| cov3_4_5_6_7_8_9_10_11 | 49.6151 | -383.076 | 0.3960859 | 0 | 0            | 0 | 0            |
| cov2_3_4_5_6_7_8_9_10  | 49.6219 | -383.079 | 0.3964413 | 0 | 0            | 0 | -0.00645981  |
| cov1_4_5_6_7_8_9_10_11 | 49.6541 | -383.095 | 0.3947239 | 0 | -0.061072035 | 0 | 0            |
| cov2_3_4_5_7_8_9_10_11 | 49.7122 | -383.124 | 0.396677  | 0 | 0            | 0 | 0.002040515  |
| cov1_2_3_4_5_7_8_9_11  | 49.7614 | -383.149 | 0.3975173 | 0 | -0.09280297  | 0 | 0.028761133  |
| cov1_2_4_6_7_8_9_10_11 | 49.7705 | -383.153 | 0.3927937 | 0 | -0.14540492  | 0 | 0.058574454  |
| cov2_4_5_6_7_8_9_10_11 | 49.8343 | -383.185 | 0.3938041 | 0 | 0            | 0 | 0.007737327  |
| cov1_2_4_5_6_7_8_9_11  | 49.856  | -383.196 | 0.3935443 | 0 | -0.096145609 | 0 | 0.03487221   |
| cov1_2_3_4_6_8_9_10_11 | 49.9226 | -383.229 | 0.3987361 | 0 | -0.16872682  | 0 | 0.034619502  |
| cov1_2_3_4_5_6_8_10_11 | 49.9268 | -383.232 | 0.3985574 | 0 | -0.16014627  | 0 | 0.032165238  |
| cov1_2_3_4_5_6_8_9_10  | 49.9318 | -383.234 | 0.3985103 | 0 | -0.15644648  | 0 | 0.033191245  |
| cov1_2_4_5_7_8_9_10_11 | 49.9327 | -383.235 | 0.3937097 | 0 | -0.040645335 | 0 | 0.0358622    |
| cov1_2_3_5_6_8_9_10_11 | 50.004  | -383.27  | 0.39993   | 0 | -0.14201884  | 0 | 0.013085388  |
| cov2_3_4_5_6_7_8_9_11  | 50.0173 | -383.277 | 0.3960069 | 0 | 0            | 0 | -0.00691794  |



|                            |         |          |           |   |              |   |              |
|----------------------------|---------|----------|-----------|---|--------------|---|--------------|
| cov1_3_4_5_6_8_9_10_11     | 50.0219 | -383.279 | 0.3998095 | 0 | -0.13580665  | 0 | 0            |
| cov1_2_3_4_5_6_7_10_11     | 50.1061 | -383.321 | 0.3982664 | 0 | -0.15095778  | 0 | 0.031563956  |
| cov1_2_3_4_5_6_7_9_10      | 50.1072 | -383.322 | 0.3982496 | 0 | -0.14810012  | 0 | 0.032409544  |
| cov1_2_3_4_6_7_9_10_11     | 50.1141 | -383.325 | 0.3984861 | 0 | -0.16738608  | 0 | 0.036259416  |
| cov1_2_3_5_6_7_9_10_11     | 50.1735 | -383.355 | 0.3995524 | 0 | -0.13387406  | 0 | 0.013708121  |
| cov1_3_4_5_6_7_9_10_11     | 50.198  | -383.367 | 0.3994904 | 0 | -0.12699686  | 0 | 0            |
| cov1_2_3_4_5_6_8_9_11      | 50.308  | -383.422 | 0.3983919 | 0 | -0.16356923  | 0 | 0.030809274  |
| cov1_2_3_4_5_6_9_10_11     | 50.4097 | -383.473 | 0.396921  | 0 | -0.10969844  | 0 | 0.028964745  |
| cov1_2_3_4_5_8_9_10_11     | 50.477  | -383.507 | 0.3988661 | 0 | -0.10303636  | 0 | 0.031629358  |
| cov1_2_3_4_5_6_7_9_11      | 50.481  | -383.509 | 0.3980938 | 0 | -0.15424913  | 0 | 0.030206284  |
| cov2_3_4_6_7_8_9_10_11     | 50.5838 | -383.56  | 0.3959996 | 0 | 0            | 0 | 0.001545938  |
| cov1_2_4_5_6_8_9_10_11     | 50.6432 | -383.59  | 0.3940172 | 0 | -0.10627405  | 0 | 0.039017149  |
| cov1_2_4_5_6_7_9_10_11     | 50.6489 | -383.593 | 0.3942683 | 0 | -0.10264975  | 0 | 0.037393615  |
| cov1_2_3_4_5_7_9_10_11     | 50.6702 | -383.603 | 0.3985428 | 0 | -0.092269511 | 0 | 0.030951141  |
| cov2_3_4_5_6_8_9_10_11     | 50.7584 | -383.647 | 0.3971829 | 0 | 0            | 0 | -0.009008277 |
| cov2_3_4_5_6_7_9_10_11     | 50.837  | -383.687 | 0.3969112 | 0 | 0            | 0 | -0.006936602 |
| cov1_2_3_4_5_6_7_8_11      | 52.5389 | -384.538 | 0.4039525 | 0 | -0.2303306   | 0 | 0.02810226   |
| cov1_2_3_4_5_6_7_8_10_11   | 56.0186 | -382.763 | 0.3976041 | 0 | -0.13958187  | 0 | 0.030809196  |
| cov1_2_3_4_5_6_7_8_9_10    | 56.0193 | -382.763 | 0.397592  | 0 | -0.13682587  | 0 | 0.031630095  |
| cov1_2_3_4_6_7_8_9_10_11   | 56.0284 | -382.768 | 0.3978306 | 0 | -0.15677308  | 0 | 0.035722929  |
| cov1_2_3_5_6_7_8_9_10_11   | 56.0799 | -382.794 | 0.3988276 | 0 | -0.12323299  | 0 | 0.013737267  |
| cov1_3_4_5_6_7_8_9_10_11   | 56.1061 | -382.807 | 0.3987927 | 0 | -0.11616984  | 0 | 0            |
| cov1_2_3_4_5_6_7_8_9_11    | 56.3944 | -382.951 | 0.3974278 | 0 | -0.14286143  | 0 | 0.029447941  |
| cov1_2_3_4_5_7_8_9_10_11   | 56.4196 | -382.963 | 0.3978176 | 0 | -0.089689843 | 0 | 0.030271218  |
| cov1_2_4_5_6_7_8_9_10_11   | 56.5505 | -383.029 | 0.3936581 | 0 | -0.091788175 | 0 | 0.036597981  |
| cov2_3_4_5_6_7_8_9_10_11   | 56.6415 | -383.074 | 0.3963334 | 0 | 0            | 0 | -0.004704421 |
| cov1_2_3_4_5_6_8_9_10_11   | 56.9479 | -383.228 | 0.3986896 | 0 | -0.16105808  | 0 | 0.032361527  |
| cov1_2_3_4_5_6_7_9_10_11   | 57.1279 | -383.318 | 0.3983935 | 0 | -0.15183558  | 0 | 0.031749965  |
| cov1_2_3_4_5_6_7_8_9_10_11 | 63.0406 | -382.759 | 0.3977296 | 0 | -0.14044447  | 0 | 0.030992046  |

[illegible]

|   |              |   |              |   |              |              |             |
|---|--------------|---|--------------|---|--------------|--------------|-------------|
| 0 | 0            | 0 | 0            | 0 | 0            | 0            | 0           |
| 0 | 0            | 0 | 0            | 0 | 0            | 0            | 0.016574864 |
| 0 | 0            | 0 | 0            | 0 | 0            | 0            | 0           |
| 0 | 0.030838206  | 0 | 0            | 0 | 0            | -0.10476527  | 0           |
| 0 | 0            | 0 | -0.044106082 | 0 | 0            | 0            | 0           |
| 0 | 0            | 0 | 0            | 0 | 0            | -0.085855729 | 0           |
| 0 | 0            | 0 | -0.070582377 | 0 | 0            | 0            | 0           |
| 0 | 0            | 0 | 0            | 0 | 0            | -0.10091598  | 0.024424376 |
| 0 | 0            | 0 | 0            | 0 | 0            | 0            | 0           |
| 0 | 0            | 0 | 0            | 0 | 0            | -0.10111712  | 0           |
| 0 | 0.02993751   | 0 | 0            | 0 | 0            | 0            | 0           |
| 0 | 0            | 0 | 0            | 0 | 0            | 0            | 0.024456453 |
| 0 | 0            | 0 | 0            | 0 | 0            | 0            | 0           |
| 0 | -0.009047409 | 0 | -0.096067892 | 0 | 0            | 0            | 0           |
| 0 | 0            | 0 | -0.094150793 | 0 | 0            | 0            | 0.012006464 |
| 0 | 0            | 0 | -0.094651349 | 0 | 0            | 0            | 0           |
| 0 | 0            | 0 | 0            | 0 | -0.12747905  | 0            | 0.046458446 |
| 0 | 0.031748396  | 0 | 0            | 0 | -0.090066908 | 0            | 0           |
| 0 | 0            | 0 | 0            | 0 | -0.10366554  | 0            | 0           |
| 0 | 0            | 0 | 0            | 0 | -0.10028368  | 0            | 0           |
| 0 | 0            | 0 | 0            | 0 | -0.092996347 | 0            | 0.012790191 |
| 0 | 0            | 0 | 0            | 0 | -0.093078966 | 0            | 0           |
| 0 | 0            | 0 | 0            | 0 | -0.093503558 | 0            | 0           |
| 0 | 0            | 0 | -0.004999624 | 0 | -0.088844235 | 0            | 0           |
| 0 | 0            | 0 | 0            | 0 | -0.091568577 | 0            | 0           |
| 0 | 0            | 0 | 0            | 0 | -0.12283036  | 0            | 0.043279981 |
| 0 | 0.029855509  | 0 | 0            | 0 | -0.088200803 | 0            | 0           |
| 0 | 0.052725005  | 0 | 0            | 0 | 0            | 0            | 0           |
| 0 | 0            | 0 | 0            | 0 | 0            | 0            | 0.054449989 |
| 0 | 0.040219608  | 0 | 0            | 0 | 0            | 0            | 0           |
| 0 | 0            | 0 | 0            | 0 | 0            | 0            | 0           |
| 0 | 0            | 0 | 0            | 0 | -0.098115788 | 0            | 0           |
| 0 | 0            | 0 | 0            | 0 | -0.09108329  | 0            | 0.013572773 |
| 0 | 0            | 0 | 0            | 0 | -0.099119298 | 0            | 0           |
| 0 | 0            | 0 | -0.00698001  | 0 | -0.085222299 | 0            | 0           |
| 0 | 0            | 0 | 0            | 0 | -0.091157387 | 0            | 0           |
| 0 | 0            | 0 | 0            | 0 | -0.085092095 | 0            | 0           |
| 0 | 0.05080256   | 0 | 0            | 0 | 0            | 0            | 0           |
| 0 | 0            | 0 | 0            | 0 | 0            | 0.071449513  | 0           |
| 0 | 0            | 0 | -0.041136486 | 0 | 0            | 0            | 0           |
| 0 | 0            | 0 | 0            | 0 | 0            | 0.070967393  | 0           |
| 0 | 0            | 0 | -0.040065288 | 0 | 0            | 0            | 0           |
| 0 | 0            | 0 | 0            | 0 | 0            | 0            | 0           |
| 0 | 0            | 0 | 0            | 0 | 0            | 0            | 0           |
| 0 | 0            | 0 | 0            | 0 | 0            | 0            | 0.010037932 |
| 0 | 0            | 0 | 0            | 0 | 0            | 0            | 0           |
| 0 | 0            | 0 | 0            | 0 | 0            | 0            | 0           |

|   |             |   |              |   |             |              |   |              |
|---|-------------|---|--------------|---|-------------|--------------|---|--------------|
| 0 | 0.026805781 | 0 | -0.077032439 | 0 | 0           | 0            | 0 | 0            |
| 0 | 0           | 0 | 0            | 0 | 0           | 0            | 0 | 0            |
| 0 | 0           | 0 | 0            | 0 | 0           | 0            | 0 | 0            |
| 0 | 0           | 0 | 0            | 0 | 0           | 0            | 0 | 0.010649384  |
| 0 | 0           | 0 | -0.072208586 | 0 | 0           | 0            | 0 | 0            |
| 0 | 0           | 0 | 0            | 0 | 0           | 0            | 0 | 0            |
| 0 | 0           | 0 | -0.073018185 | 0 | 0           | -0.012745205 | 0 | 0            |
| 0 | 0           | 0 | -0.081509412 | 0 | 0           | 0            | 0 | 0            |
| 0 | 0           | 0 | -0.085597152 | 0 | 0           | 0            | 0 | 0            |
| 0 | 0           | 0 | -0.080779624 | 0 | 0           | 0            | 0 | 0            |
| 0 | 0           | 0 | -0.081040245 | 0 | 0           | 0            | 0 | -0.001261575 |
| 0 | 0.025205599 | 0 | -0.075901312 | 0 | 0           | 0            | 0 | 0            |
| 0 | 0           | 0 | -0.071493818 | 0 | 0           | 0            | 0 | 0            |
| 0 | 0           | 0 | -0.071959888 | 0 | 0           | -0.012514793 | 0 | 0            |
| 0 | 0           | 0 | -0.08015619  | 0 | 0           | 0            | 0 | 0            |
| 0 | 0           | 0 | -0.082820649 | 0 | 0           | 0            | 0 | 0            |
| 0 | 0           | 0 | -0.07968986  | 0 | 0           | 0            | 0 | -0.000420414 |
| 0 | 0.052699999 | 0 | 0            | 0 | 0           | 0            | 0 | 0            |
| 0 | 0           | 0 | 0            | 0 | 0           | 0            | 0 | 0.98715265   |
| 0 | 0.050959709 | 0 | 0            | 0 | 0           | 0            | 0 | 0            |
| 0 | 0.051655553 | 0 | 0            | 0 | 0           | -0.069948647 | 0 | 0            |
| 0 | 0.063751175 | 0 | 0            | 0 | 0           | 0            | 0 | 0            |
| 0 | 0.049802571 | 0 | 0            | 0 | 0           | -0.069090279 | 0 | 0            |
| 0 | 0.061346446 | 0 | 0            | 0 | 0           | 0            | 0 | 0            |
| 0 | 0           | 0 | 0            | 0 | 0           | -0.034874972 | 0 | 0            |
| 0 | 0           | 0 | 0            | 0 | 0           | 0            | 0 | 0            |
| 0 | 0           | 0 | 0            | 0 | 0           | -0.033547465 | 0 | 0            |
| 0 | 0.032742968 | 0 | 0            | 0 | 0           | 0.047576311  | 0 | 0            |
| 0 | 0           | 0 | 0            | 0 | 0           | 0            | 0 | 0            |
| 0 | 0           | 0 | 0            | 0 | 0           | 0            | 0 | 0.013663661  |
| 0 | 0           | 0 | 0            | 0 | 0           | 0            | 0 | 0            |
| 0 | 0           | 0 | 0            | 0 | 0           | 0            | 0 | 0            |
| 0 | 0.052769796 | 0 | 0            | 0 | 0           | 0            | 0 | 0            |
| 0 | 0           | 0 | 0            | 0 | 0           | -0.050257179 | 0 | 0            |
| 0 | 0.046395829 | 0 | 0            | 0 | 0           | 0            | 0 | -0.024618004 |
| 0 | 0.031430505 | 0 | 0            | 0 | 0           | 0            | 0 | 0            |
| 0 | 0           | 0 | 0            | 0 | 0           | 0            | 0 | 0.014108366  |
| 0 | 0.038204082 | 0 | 0            | 0 | 0.015535783 | 0            | 0 | 0            |
| 0 | 0.033496614 | 0 | 0            | 0 | 0           | 0            | 0 | 0            |
| 0 | 0           | 0 | 0            | 0 | 0           | 0            | 0 | 0            |
| 0 | 0.033036477 | 0 | -0.001924725 | 0 | 0           | 0            | 0 | 0            |
| 0 | 0           | 0 | 0            | 0 | 0           | -0.068300082 | 0 | 0.014468525  |
| 0 | 0           | 0 | 0            | 0 | 0           | -0.068359632 | 0 | 0            |
| 0 | 0           | 0 | -0.016422312 | 0 | 0           | 0.05059033   | 0 | 0            |
| 0 | 0           | 0 | 0            | 0 | 0           | 0.047166758  | 0 | 0            |
| 0 | 0           | 0 | 0            | 0 | 0           | -0.06842705  | 0 | 0            |
| 0 | 0           | 0 | 0            | 0 | 0           | -0.050354707 | 0 | 0            |

|   |              |   |              |   |              |              |              |              |
|---|--------------|---|--------------|---|--------------|--------------|--------------|--------------|
| 0 | 0            | 0 | 0            | 0 | 0            | 0.048923461  | 0            | 0.016573852  |
| 0 | 0            | 0 | 0            | 0 | 0            | 0.049363177  | 0            | 0            |
| 0 | 0            | 0 | 0            | 0 | 0            | 0.04928131   | 0            | 0            |
| 0 | 0            | 0 | 0            | 0 | -0.007950438 | 0            | 0.049596006  | 0            |
| 0 | 0            | 0 | 0            | 0 | 0            | -0.067503837 | 0            | 0.014988728  |
| 0 | 0            | 0 | -0.015096608 | 0 | 0            | 0            | 0            | 0            |
| 0 | 0            | 0 | -0.025967721 | 0 | 0            | 0            | 0            | 0            |
| 0 | 0            | 0 | 0            | 0 | 0            | -0.067556695 | 0            | 0            |
| 0 | 0            | 0 | 0            | 0 | 0            | 0            | 0            | 0.01214717   |
| 0 | 0            | 0 | -0.014017658 | 0 | 0            | 0            | 0            | 0.015936007  |
| 0 | 0            | 0 | 0            | 0 | 0            | 0            | 0            | 0            |
| 0 | 0            | 0 | 0            | 0 | -0.00857894  | 0            | 0            | 0            |
| 0 | 0            | 0 | 0            | 0 | 0            | 0            | 0            | 0            |
| 0 | 0            | 0 | -0.014654323 | 0 | 0            | 0            | 0            | 0            |
| 0 | 0            | 0 | -0.020142008 | 0 | 0.009781763  | 0            | 0            | 0            |
| 0 | 0            | 0 | 0            | 0 | 0            | 0            | 0            | 0.017716703  |
| 0 | 0            | 0 | 0            | 0 | -0.009820813 | 0            | 0            | 0.018471373  |
| 0 | 0            | 0 | 0            | 0 | 0            | 0            | 0            | 0.03322006   |
| 0 | 0            | 0 | 0            | 0 | 0            | 0            | 0            | 0            |
| 0 | 0            | 0 | 0            | 0 | -0.009308859 | 0            | 0            | 0            |
| 0 | 0            | 0 | 0            | 0 | -0.008824744 | 0            | 0            | 0            |
| 0 | 0            | 0 | 0            | 0 | 0            | 0            | 0            | 0            |
| 0 | 0            | 0 | 0            | 0 | 0            | 0            | 0            | 0.033346202  |
| 0 | 0            | 0 | 0            | 0 | 0            | 0            | 0            | 0            |
| 0 | 0            | 0 | 0            | 0 | 0            | 0            | 0            | 1.0074462    |
| 0 | 0            | 0 | 0            | 0 | 0            | 0            | 0            | 0            |
| 0 | 0            | 0 | 0            | 0 | -0.10547487  | 0            | 0            | 0.98286753   |
| 0 | 0            | 0 | 0            | 0 | 0            | 0            | 0            | 1.0398189    |
| 0 | 0            | 0 | 0            | 0 | 0            | 0            | 0            | 1.0398511    |
| 0 | 0.088726111  | 0 | 0            | 0 | 0            | 0            | 0            | 0            |
| 0 | 0.081199112  | 0 | 0            | 0 | 0            | 0            | 0            | -0.059857006 |
| 0 | 0.08421276   | 0 | 0            | 0 | 0            | 0            | 0            | 0            |
| 0 | 0            | 0 | 0            | 0 | 0            | -0.10310178  | 0            | 1.0937873    |
| 0 | 0.07675871   | 0 | 0            | 0 | 0            | 0            | 0            | -0.055225287 |
| 0 | 0.048345499  | 0 | 0            | 0 | 0            | 0            | 0            | 0            |
| 0 | 0            | 0 | 0            | 0 | -0.059390522 | 0            | -0.029614182 | 0            |
| 0 | 0            | 0 | 0            | 0 | -0.073368132 | 0            | 0            | 0.025657587  |
| 0 | 0            | 0 | 0            | 0 | -0.070616207 | 0            | -0.044857526 | 0.025796946  |
| 0 | 0            | 0 | 0            | 0 | -0.073305349 | 0            | 0            | 0            |
| 0 | 0.011425782  | 0 | 0            | 0 | -0.069412267 | 0            | 0            | 0            |
| 0 | 0            | 0 | 0.016674808  | 0 | -0.082864869 | 0            | 0            | 0            |
| 0 | 0            | 0 | 0            | 0 | -0.069444259 | 0            | 0            | 0            |
| 0 | 0            | 0 | 0            | 0 | -0.070597824 | 0            | -0.045055971 | 0            |
| 0 | 0.012671634  | 0 | 0            | 0 | -0.065214977 | 0            | -0.051203078 | 0            |
| 0 | 0            | 0 | -0.014929142 | 0 | -0.057333074 | 0            | -0.045957864 | 0            |
| 0 | 0            | 0 | 0            | 0 | -0.068128462 | 0            | -0.041672078 | 0            |
| 0 | -0.009720645 | 0 | 0            | 0 | 0            | 0            | 0            | 0.043322653  |

|   |              |   |              |   |              |   |              |              |
|---|--------------|---|--------------|---|--------------|---|--------------|--------------|
| 0 | 0            | 0 | 0            | 0 | 0            | 0 | 0            | 0.99991215   |
| 0 | 0            | 0 | 0            | 0 | -0.087035854 | 0 | 0            | 0.035697856  |
| 0 | -0.003243814 | 0 | 0            | 0 | 0            | 0 | 0            | 0            |
| 0 | 0.032713492  | 0 | 0            | 0 | 0            | 0 | -0.063291409 | 0            |
| 0 | 0            | 0 | 0            | 0 | -0.087906668 | 0 | 0            | 0            |
| 0 | -0.029099501 | 0 | 0            | 0 | -0.10737708  | 0 | 0            | 0.054189101  |
| 0 | 0            | 0 | -0.036223687 | 0 | 0            | 0 | -0.056603778 | 0            |
| 0 | 0            | 0 | -0.016636691 | 0 | -0.076405116 | 0 | 0            | 0            |
| 0 | 0.015547574  | 0 | -0.043930599 | 0 | 0            | 0 | -0.073141529 | 0            |
| 0 | 0            | 0 | -0.047435873 | 0 | 0            | 0 | -0.057935092 | 0            |
| 0 | 0            | 0 | -0.047703665 | 0 | 0            | 0 | -0.068497928 | 0.016235281  |
| 0 | 0.008618233  | 0 | 0            | 0 | -0.088293966 | 0 | 0            | 0            |
| 0 | -0.02260741  | 0 | 0            | 0 | -0.10717502  | 0 | 0            | 0            |
| 0 | 0            | 0 | -0.048446495 | 0 | 0            | 0 | -0.068200619 | 0            |
| 0 | 0            | 0 | -0.009234562 | 0 | -0.09789227  | 0 | 0            | 0.026459727  |
| 0 | 0            | 0 | -0.01079935  | 0 | -0.096678639 | 0 | 0            | 0            |
| 0 | 0            | 0 | 0            | 0 | 0            | 0 | -0.060896742 | 0.023199487  |
| 0 | -0.003636188 | 0 | -0.015759498 | 0 | -0.092989129 | 0 | 0            | 0            |
| 0 | 0            | 0 | 0            | 0 | 0            | 0 | 0            | 0.016147272  |
| 0 | 0            | 0 | 0            | 0 | 0            | 0 | -0.060934808 | 0            |
| 0 | 0            | 0 | 0            | 0 | 0            | 0 | -0.055845079 | 0            |
| 0 | 0            | 0 | 0            | 0 | 0            | 0 | 0            | 0            |
| 0 | 0.03627495   | 0 | 0            | 0 | 0            | 0 | -0.084043792 | 0            |
| 0 | 0            | 0 | -0.093800821 | 0 | 0            | 0 | 0            | 0.96870291   |
| 0 | 0.037400821  | 0 | 0            | 0 | 0            | 0 | 0            | 0            |
| 0 | 0            | 0 | -0.04317272  | 0 | 0            | 0 | 0            | 0            |
| 0 | 0.041500023  | 0 | 0            | 0 | 0            | 0 | -0.10651322  | 0            |
| 0 | 0            | 0 | 0            | 0 | 0            | 0 | -0.080320785 | 0.032872362  |
| 0 | 0.034335721  | 0 | 0            | 0 | 0            | 0 | -0.10532408  | -0.006811511 |
| 0 | 0            | 0 | -0.065839937 | 0 | 0            | 0 | 0            | 0.029923121  |
| 0 | 0            | 0 | 0            | 0 | 0            | 0 | 0            | 0.03529249   |
| 0 | 0            | 0 | 0            | 0 | 0            | 0 | -0.081594557 | 0            |
| 0 | 0.017238725  | 0 | -0.03457878  | 0 | 0            | 0 | 0            | 0            |
| 0 | 0            | 0 | -0.041718902 | 0 | 0            | 0 | 0            | 0.017889451  |
| 0 | 0            | 0 | -0.067061991 | 0 | 0            | 0 | 0            | 0            |
| 0 | 0            | 0 | 0            | 0 | 0            | 0 | 0            | 0            |
| 0 | 0            | 0 | -0.042680938 | 0 | 0            | 0 | 0            | 0            |
| 0 | 0.012551431  | 0 | -0.06675793  | 0 | 0            | 0 | 0            | 0            |
| 0 | 0.039108581  | 0 | 0            | 0 | 0            | 0 | 0            | 0            |
| 0 | 0.032612144  | 0 | 0            | 0 | 0            | 0 | 0            | -0.005212743 |
| 0 | 0            | 0 | 0            | 0 | -0.092467143 | 0 | 0            | 1.014268     |
| 0 | 0            | 0 | 0            | 0 | 0            | 0 | 0            | 1.0397314    |
| 0 | 0            | 0 | 0            | 0 | -0.090521579 | 0 | 0            | 1.014095     |
| 0 | -0.026704294 | 0 | -0.09556908  | 0 | 0            | 0 | 0            | 0.035612768  |
| 0 | -0.020410951 | 0 | -0.09575304  | 0 | 0            | 0 | 0            | 0            |
| 0 | 0.10463791   | 0 | 0            | 0 | 0            | 0 | 0            | 0            |
| 0 | 0            | 0 | 0            | 0 | -0.096325595 | 0 | 0.078092504  | 0            |

|   |             |   |              |   |              |   |             |   |              |
|---|-------------|---|--------------|---|--------------|---|-------------|---|--------------|
| 0 | 0.024712783 | 0 | 0            | 0 | -0.11871894  | 0 | 0.037841381 | 0 | 0            |
| 0 | 0.058873993 | 0 | 0            | 0 | -0.087952086 | 0 | 0           | 0 | 0            |
| 0 | 0.097401875 | 0 | 0            | 0 | 0            | 0 | 0           | 0 | -0.081537147 |
| 0 | 0.051078235 | 0 | 0            | 0 | -0.088578269 | 0 | 0           | 0 | -0.034886454 |
| 0 | 0.052363541 | 0 | 0            | 0 | 0            | 0 | 0.070651618 | 0 | 0            |
| 0 | 0           | 0 | 0            | 0 | 0            | 0 | 0           | 0 | 1.0127632    |
| 0 | 0           | 0 | 0            | 0 | -0.12732663  | 0 | 0.046441006 | 0 | 0.012722609  |
| 0 | 0.099184202 | 0 | 0            | 0 | 0            | 0 | 0           | 0 | 0            |
| 0 | 0.0370285   | 0 | 0            | 0 | -0.068032574 | 0 | 0           | 0 | 0            |
| 0 | 0           | 0 | 0            | 0 | -0.12744371  | 0 | 0.046492656 | 0 | 0            |
| 0 | 0           | 0 | -0.003419711 | 0 | -0.12445827  | 0 | 0.046344163 | 0 | 0            |
| 0 | 0           | 0 | 0            | 0 | -0.12835471  | 0 | 0.045660604 | 0 | 0            |
| 0 | 0           | 0 | 0            | 0 | -0.12749721  | 0 | 0.04633166  | 0 | 0            |
| 0 | 0           | 0 | 0            | 0 | -0.127322    | 0 | 0.046733059 | 0 | 0            |
| 0 | 0.030426748 | 0 | 0            | 0 | -0.095004611 | 0 | 0           | 0 | 0            |
| 0 | 0.03173052  | 0 | 0            | 0 | -0.090420334 | 0 | 0           | 0 | 0            |
| 0 | 0.032081999 | 0 | 0.002681892  | 0 | -0.09233761  | 0 | 0           | 0 | 0            |
| 0 | 0.031683102 | 0 | 0            | 0 | -0.090189608 | 0 | 0           | 0 | 0            |
| 0 | 0           | 0 | 0            | 0 | -0.089722107 | 0 | 0.077152231 | 0 | 0            |
| 0 | 0           | 0 | 0            | 0 | 0            | 0 | 0           | 0 | 1.0122444    |
| 0 | 0.092018048 | 0 | 0            | 0 | 0            | 0 | 0           | 0 | -0.07568439  |
| 0 | 0.05040766  | 0 | 0            | 0 | 0            | 0 | 0.070113325 | 0 | 0            |
| 0 | 0.023281195 | 0 | 0            | 0 | -0.11446363  | 0 | 0.035046048 | 0 | 0            |
| 0 | 0.053783949 | 0 | 0            | 0 | -0.086181625 | 0 | 0           | 0 | 0            |
| 0 | 0           | 0 | -0.018575282 | 0 | -0.093282648 | 0 | 0           | 0 | 0            |
| 0 | 0           | 0 | 0            | 0 | -0.10360888  | 0 | 0           | 0 | 0.012959958  |
| 0 | 0           | 0 | -0.044471957 | 0 | 0            | 0 | 0.076541128 | 0 | 0            |
| 0 | 0           | 0 | 0            | 0 | -0.093268187 | 0 | 0           | 0 | 0            |
| 0 | 0           | 0 | 0            | 0 | -0.1070314   | 0 | 0           | 0 | 0            |
| 0 | 0           | 0 | -0.08051391  | 0 | 0            | 0 | 0           | 0 | 1.0031497    |
| 0 | 0           | 0 | 0            | 0 | -0.099062868 | 0 | 0           | 0 | 0.009898523  |
| 0 | 0           | 0 | 0            | 0 | -0.10364376  | 0 | 0           | 0 | 0            |
| 0 | 0           | 0 | 0            | 0 | -0.10397963  | 0 | 0           | 0 | 0            |
| 0 | 0           | 0 | 0            | 0 | -0.091146658 | 0 | 0           | 0 | 0            |
| 0 | 0.045023126 | 0 | -0.024125123 | 0 | 0            | 0 | 0           | 0 | 0            |
| 0 | 0           | 0 | 0            | 0 | -0.1004613   | 0 | 0           | 0 | 0            |
| 0 | 0           | 0 | -0.003966571 | 0 | -0.096758779 | 0 | 0           | 0 | 0            |
| 0 | 0           | 0 | 0            | 0 | -0.10000218  | 0 | 0           | 0 | 0            |
| 0 | 0           | 0 | 0            | 0 | -0.093365956 | 0 | 0           | 0 | 0.012803742  |
| 0 | 0.036280818 | 0 | 0            | 0 | -0.06183     | 0 | 0           | 0 | 0            |
| 0 | 0           | 0 | -0.002396272 | 0 | -0.09094425  | 0 | 0           | 0 | 0.012347822  |
| 0 | 0           | 0 | 0            | 0 | -0.092177738 | 0 | 0           | 0 | 0.012752894  |
| 0 | 0.046032838 | 0 | 0            | 0 | -0.086851971 | 0 | 0           | 0 | -0.029321817 |
| 0 | 0           | 0 | 0            | 0 | -0.12269401  | 0 | 0.043275018 | 0 | 0.013549542  |
| 0 | 0           | 0 | 0            | 0 | -0.093446586 | 0 | 0           | 0 | 0            |
| 0 | 0           | 0 | -0.004812758 | 0 | -0.089359158 | 0 | 0           | 0 | 0            |
| 0 | 0           | 0 | -0.003979802 | 0 | -0.089669335 | 0 | 0           | 0 | 0            |

|   |             |   |              |   |              |   |             |   |             |
|---|-------------|---|--------------|---|--------------|---|-------------|---|-------------|
| 0 | 0           | 0 | 0            | 0 | -0.09183279  | 0 | 0           | 0 | 0           |
| 0 | 0           | 0 | 0            | 0 | -0.091427356 | 0 | 0           | 0 | 0           |
| 0 | 0           | 0 | -0.00520144  | 0 | -0.086540714 | 0 | 0           | 0 | 0           |
| 0 | 0           | 0 | 0            | 0 | -0.12280251  | 0 | 0.043325533 | 0 | 0           |
| 0 | 0.022783277 | 0 | 0            | 0 | 0            | 0 | 0           | 0 | 0.034589698 |
| 0 | 0           | 0 | -0.0057694   | 0 | -0.11775966  | 0 | 0.043120559 | 0 | 0           |
| 0 | 0           | 0 | 0            | 0 | -0.12238806  | 0 | 0.043697752 | 0 | 0           |
| 0 | 0           | 0 | 0            | 0 | -0.1228717   | 0 | 0.04320898  | 0 | 0           |
| 0 | 0.029179032 | 0 | 0            | 0 | -0.090666004 | 0 | 0           | 0 | 0           |
| 0 | 0.029651868 | 0 | 0            | 0 | -0.088582112 | 0 | 0           | 0 | 0           |
| 0 | 0.029861479 | 0 | 4.68E-05     | 0 | -0.08823996  | 0 | 0           | 0 | 0           |
| 0 | 0.052441297 | 0 | 0            | 0 | 0            | 0 | 0           | 0 | 0           |
| 0 | 0           | 0 | -0.066948007 | 0 | 0            | 0 | 0           | 0 | 0           |
| 0 | 0.052840247 | 0 | 0            | 0 | 0            | 0 | 0           | 0 | 0           |
| 0 | 0.052125636 | 0 | 0            | 0 | 0            | 0 | 0           | 0 | 0           |
| 0 | 0.029308842 | 0 | 0            | 0 | 0            | 0 | 0           | 0 | 0           |
| 0 | 0           | 0 | -0.079141847 | 0 | 0            | 0 | 0           | 0 | 1.0033508   |
| 0 | 0           | 0 | -0.04341696  | 0 | 0            | 0 | 0.076001217 | 0 | 0           |
| 0 | 0.043244114 | 0 | -0.023588496 | 0 | 0            | 0 | 0           | 0 | 0           |
| 0 | 0           | 0 | -0.018482136 | 0 | -0.088745041 | 0 | 0           | 0 | 0           |
| 0 | 0           | 0 | 0            | 0 | -0.084755069 | 0 | 0           | 0 | 0           |
| 0 | 0           | 0 | 0            | 0 | -0.099087931 | 0 | 0           | 0 | 0.013723173 |
| 0 | 0           | 0 | 0            | 0 | -0.086439231 | 0 | 0           | 0 | 0           |
| 0 | 0           | 0 | 0            | 0 | -0.09679972  | 0 | 0           | 0 | 0.010819218 |
| 0 | 0           | 0 | 0            | 0 | -0.10271333  | 0 | 0           | 0 | 0           |
| 0 | 0           | 0 | -0.006018408 | 0 | -0.092773414 | 0 | 0           | 0 | 0           |
| 0 | 0           | 0 | 0            | 0 | -0.097726289 | 0 | 0           | 0 | 0           |
| 0 | 0           | 0 | 0            | 0 | -0.085756947 | 0 | 0           | 0 | 0.013324498 |
| 0 | 0           | 0 | 0            | 0 | -0.099108415 | 0 | 0           | 0 | 0           |
| 0 | 0           | 0 | -0.004275042 | 0 | -0.087419958 | 0 | 0           | 0 | 0.012780777 |
| 0 | 0           | 0 | -0.007590483 | 0 | -0.077819976 | 0 | 0           | 0 | 0           |
| 0 | 0           | 0 | -0.005863692 | 0 | -0.086132113 | 0 | 0           | 0 | 0           |
| 0 | 0           | 0 | 0            | 0 | -0.08539702  | 0 | 0           | 0 | 0           |
| 0 | 0.050530429 | 0 | 0            | 0 | 0            | 0 | 0           | 0 | 0           |
| 0 | 0.04990949  | 0 | 0            | 0 | 0            | 0 | 0           | 0 | 0           |
| 0 | 0           | 0 | -0.064249934 | 0 | 0            | 0 | 0           | 0 | 0           |
| 0 | 0           | 0 | 0            | 0 | 0            | 0 | 0.069624548 | 0 | 0           |
| 0 | 0           | 0 | 0            | 0 | 0            | 0 | 0.070858762 | 0 | 0           |
| 0 | 0           | 0 | 0            | 0 | 0            | 0 | 0.070980078 | 0 | 0.007640102 |
| 0 | 0           | 0 | 0            | 0 | 0            | 0 | 0.07124763  | 0 | 0           |
| 0 | 0           | 0 | 0            | 0 | 0            | 0 | 0.071405138 | 0 | 0           |
| 0 | 0           | 0 | -0.040696512 | 0 | 0            | 0 | 0           | 0 | 0           |
| 0 | 0           | 0 | -0.040991551 | 0 | 0            | 0 | 0           | 0 | 0           |
| 0 | 0           | 0 | -0.041558154 | 0 | 0            | 0 | 0           | 0 | 0           |
| 0 | 0           | 0 | -0.040743271 | 0 | 0            | 0 | 0           | 0 | 0.00348672  |
| 0 | 0           | 0 | 0            | 0 | 0            | 0 | 0.069002961 | 0 | 0           |
| 0 | 0           | 0 | 0            | 0 | 0            | 0 | 0.070419766 | 0 | 0           |



|   |             |   |              |   |   |   |              |   |              |
|---|-------------|---|--------------|---|---|---|--------------|---|--------------|
| 0 | 0           | 0 | 0            | 0 | 0 | 0 | 0.070459948  | 0 | 0.008276593  |
| 0 | 0.063142489 | 0 | -0.075997611 | 0 | 0 | 0 | 0            | 0 | 0            |
| 0 | 0           | 0 | 0            | 0 | 0 | 0 | 0.070891816  | 0 | 0            |
| 0 | 0           | 0 | -0.039625997 | 0 | 0 | 0 | 0            | 0 | 0            |
| 0 | 0           | 0 | -0.039589344 | 0 | 0 | 0 | 0            | 0 | 0.004305191  |
| 0 | 0           | 0 | -0.040393095 | 0 | 0 | 0 | 0            | 0 | 0            |
| 0 | 0.037957273 | 0 | -0.060732138 | 0 | 0 | 0 | 0            | 0 | 0            |
| 0 | 0.055602747 | 0 | -0.076238609 | 0 | 0 | 0 | 0            | 0 | -0.052311231 |
| 0 | 0           | 0 | 0            | 0 | 0 | 0 | 0            | 0 | 0            |
| 0 | 0           | 0 | 0            | 0 | 0 | 0 | 0            | 0 | 0            |
| 0 | 0           | 0 | 0            | 0 | 0 | 0 | 0            | 0 | 0.005183874  |
| 0 | 0           | 0 | 0            | 0 | 0 | 0 | 0            | 0 | 0            |
| 0 | 0           | 0 | 0            | 0 | 0 | 0 | 0            | 0 | 0.009747682  |
| 0 | 0           | 0 | 0            | 0 | 0 | 0 | 0            | 0 | 0            |
| 0 | 0           | 0 | 0            | 0 | 0 | 0 | 0            | 0 | 0            |
| 0 | 0           | 0 | 0            | 0 | 0 | 0 | 0            | 0 | 0.010031706  |
| 0 | 0.031691454 | 0 | -0.063082697 | 0 | 0 | 0 | -0.021246967 | 0 | 0            |
| 0 | 0           | 0 | 0            | 0 | 0 | 0 | 0            | 0 | 0            |
| 0 | 0.058517882 | 0 | -0.074852176 | 0 | 0 | 0 | 0            | 0 | 0            |
| 0 | 0.029186281 | 0 | -0.070330372 | 0 | 0 | 0 | 0            | 0 | 0            |
| 0 | 0.026824029 | 0 | -0.076839895 | 0 | 0 | 0 | 0            | 0 | 0            |
| 0 | 0.035596636 | 0 | -0.060691104 | 0 | 0 | 0 | 0            | 0 | 0            |
| 0 | 0           | 0 | 0            | 0 | 0 | 0 | 0            | 0 | 0            |
| 0 | 0           | 0 | 0            | 0 | 0 | 0 | 0            | 0 | 0.005514521  |
| 0 | 0.051038994 | 0 | -0.075112348 | 0 | 0 | 0 | 0            | 0 | -0.047166096 |
| 0 | 0           | 0 | 0            | 0 | 0 | 0 | 0            | 0 | 0            |
| 0 | 0           | 0 | -0.084362811 | 0 | 0 | 0 | 0            | 0 | 0            |
| 0 | 0           | 0 | 0            | 0 | 0 | 0 | 0            | 0 | 0.01039765   |
| 0 | 0           | 0 | 0            | 0 | 0 | 0 | 0            | 0 | 0            |
| 0 | 0           | 0 | -0.071267247 | 0 | 0 | 0 | 0            | 0 | 0.005887958  |
| 0 | 0           | 0 | -0.071184784 | 0 | 0 | 0 | -0.002533243 | 0 | 0            |
| 0 | 0           | 0 | -0.072523819 | 0 | 0 | 0 | 0            | 0 | 0            |
| 0 | 0           | 0 | -0.072191405 | 0 | 0 | 0 | 0            | 0 | 0            |
| 0 | 0.10049904  | 0 | 0            | 0 | 0 | 0 | 0            | 0 | 0            |
| 0 | 0           | 0 | -0.081467187 | 0 | 0 | 0 | -0.01817384  | 0 | 0            |
| 0 | 0.02991664  | 0 | -0.062502123 | 0 | 0 | 0 | -0.020629876 | 0 | 0            |
| 0 | 0           | 0 | -0.073813362 | 0 | 0 | 0 | -0.012221804 | 0 | 0            |
| 0 | 0           | 0 | -0.073036431 | 0 | 0 | 0 | -0.012582556 | 0 | 0            |
| 0 | 0           | 0 | -0.073002071 | 0 | 0 | 0 | -0.012756235 | 0 | 0.000141116  |
| 0 | 0           | 0 | -0.087168692 | 0 | 0 | 0 | 0            | 0 | 0            |
| 0 | 0           | 0 | -0.081332613 | 0 | 0 | 0 | 0            | 0 | 0            |
| 0 | 0           | 0 | -0.085556276 | 0 | 0 | 0 | 0            | 0 | 0            |
| 0 | 0           | 0 | -0.085945201 | 0 | 0 | 0 | 0            | 0 | -0.002080809 |
| 0 | 0           | 0 | -0.08086125  | 0 | 0 | 0 | 0            | 0 | -0.001241176 |
| 0 | 0.028009091 | 0 | -0.068079343 | 0 | 0 | 0 | 0            | 0 | 0            |
| 0 | 0           | 0 | 0            | 0 | 0 | 0 | 0            | 0 | 1.0267325    |
| 0 | 0           | 0 | -0.081577524 | 0 | 0 | 0 | 0            | 0 | 0            |

|   |             |   |              |              |              |              |              |
|---|-------------|---|--------------|--------------|--------------|--------------|--------------|
| 0 | 0           | 0 | 0            | 0            | -0.070393499 | 0            | 1.0895206    |
| 0 | 0.093119797 | 0 | 0            | 0            | 0            | 0            | -0.07373977  |
| 0 | 0           | 0 | -0.070474755 | 0            | 0            | 0            | 0.006399304  |
| 0 | 0           | 0 | -0.070231197 | 0            | 0            | 0            | 0            |
| 0 | 0           | 0 | -0.071726518 | 0            | 0            | 0            | 0            |
| 0 | 0           | 0 | -0.07893442  | 0            | 0            | 0            | 0            |
| 0 | 0.097771994 | 0 | 0            | 0            | 0            | -0.072247634 | 0            |
| 0 | 0.095702396 | 0 | 0            | 0            | 0            | 0            | 0            |
| 0 | 0           | 0 | -0.072662992 | 0            | 0            | 0            | 0            |
| 0 | 0.059632437 | 0 | 0            | 0            | 0            | 0            | 0            |
| 0 | 0           | 0 | -0.071852464 | 0            | 0            | 0            | 0.000952777  |
| 0 | 0           | 0 | -0.08418562  | 0            | 0            | 0            | 0            |
| 0 | 0           | 0 | 0            | 0            | 0            | 0            | 1.0265412    |
| 0 | 0           | 0 | -0.082979863 | 0            | 0            | 0            | -0.000965736 |
| 0 | 0           | 0 | 0            | 0            | 0            | -0.069611513 | 0            |
| 0 | 0.052786937 | 0 | 0            | 0            | 0            | -0.035078021 | 0            |
| 0 | 0.045069902 | 0 | 0            | 0            | 0            | 0            | 0.9380639    |
| 0 | 0.088394687 | 0 | 0            | 0            | 0            | 0            | -0.068701559 |
| 0 | 0.089854376 | 0 | 0            | 0            | 0            | -0.071716952 | 0            |
| 0 | 0.059111705 | 0 | 0            | 0            | 0            | -0.042659647 | 0            |
| 0 | 0.057329899 | 0 | 0            | 0            | 0            | 0            | 0            |
| 0 | 0.092674486 | 0 | 0            | 0            | 0            | -0.071176723 | 0            |
| 0 | 0.099092041 | 0 | 0            | 0            | 0            | 0            | 0            |
| 0 | 0.05101002  | 0 | 0            | 0            | 0            | -0.033670482 | 0            |
| 0 | 0           | 0 | 0            | 0            | 0            | 0.037281725  | 0            |
| 0 | 0           | 0 | 0            | 0            | 0            | 0            | 1.0563512    |
| 0 | 0.052651852 | 0 | 0            | 0            | 0            | 0            | 0            |
| 0 | 0           | 0 | 0            | 0            | 0            | 0            | 0.9790848    |
| 0 | 0           | 0 | -0.013348768 | 0            | 0            | 0            | 0.98329736   |
| 0 | 0.091554743 | 0 | 0            | 0            | 0            | 0            | -0.051389279 |
| 0 | 0           | 0 | 0            | 0            | 0            | 0            | 0.9865243    |
| 0 | 0           | 0 | 0            | -0.008567132 | 0            | 0            | 0.98642362   |
| 0 | 0.084845357 | 0 | 0            | 0            | 0            | -0.07066914  | 0            |
| 0 | 0.056795623 | 0 | 0            | 0            | 0            | -0.043198299 | 0            |
| 0 | 0           | 0 | 0            | 0            | 0            | 0            | 1.0555871    |
| 0 | 0.051672135 | 0 | 0            | 0            | 0            | -0.070058483 | 0            |
| 0 | 0.093598917 | 0 | 0            | 0            | 0            | 0            | 0            |
| 0 | 0.063725622 | 0 | 0            | 0            | 0            | 0            | 0            |
| 0 | 0.0861364   | 0 | 0            | 0            | 0            | 0            | -0.046142603 |
| 0 | 0           | 0 | 0            | 0            | 0            | -0.02677544  | 0            |
| 0 | 0           | 0 | 0            | 0            | 0            | -0.034887711 | 0            |
| 0 | 0           | 0 | 0            | 0            | 0            | 0            | 0.022438113  |
| 0 | 0           | 0 | 0            | 0            | 0            | -0.034847693 | 0            |
| 0 | 0           | 0 | 0            | 0            | 0            | -0.034822317 | 0            |
| 0 | 0           | 0 | 0            | 0            | 0            | 0            | 0            |
| 0 | 0.05182951  | 0 | 0            | 0            | 0            | 0.047635066  | 0            |
| 0 | 0           | 0 | 0            | 0            | 0            | 0            | 0            |

|   |             |   |              |   |              |   |              |   |              |
|---|-------------|---|--------------|---|--------------|---|--------------|---|--------------|
| 0 | 0.081465373 | 0 | 0            | 0 | 0.047721559  | 0 | 0            | 0 | 0            |
| 0 | 0           | 0 | 0            | 0 | 0            | 0 | -0.026177583 | 0 | 0            |
| 0 | 0.045771582 | 0 | 0            | 0 | 0            | 0 | 0.047931052  | 0 | -0.025315531 |
| 0 | 0           | 0 | 0            | 0 | 0            | 0 | -0.033575465 | 0 | 0.014182461  |
| 0 | 0           | 0 | 0            | 0 | 0            | 0 | 0            | 0 | 0.022437516  |
| 0 | 0.037177982 | 0 | 0            | 0 | 0.015358107  | 0 | 0.047508345  | 0 | 0            |
| 0 | 0.030960873 | 0 | 0            | 0 | 0            | 0 | 0.04620971   | 0 | 0            |
| 0 | 0           | 0 | 0            | 0 | 0            | 0 | -0.03352719  | 0 | 0            |
| 0 | 0.032564993 | 0 | 0            | 0 | 0            | 0 | 0.047241565  | 0 | 0            |
| 0 | 0.031504883 | 0 | -0.003474061 | 0 | 0            | 0 | 0.047842837  | 0 | 0            |
| 0 | 0           | 0 | 0            | 0 | 0            | 0 | -0.04682406  | 0 | 0.023210834  |
| 0 | 0           | 0 | 0            | 0 | 0            | 0 | 0            | 0 | 0            |
| 0 | 0.052437366 | 0 | 0            | 0 | 0            | 0 | 0            | 0 | 0            |
| 0 | 0.07020223  | 0 | 0            | 0 | 0.039276402  | 0 | 0            | 0 | -0.048835118 |
| 0 | 0           | 0 | 0            | 0 | 0            | 0 | 0            | 0 | 0.013649241  |
| 0 | 0           | 0 | 0            | 0 | 0            | 0 | -0.047972047 | 0 | 0            |
| 0 | 0           | 0 | 0            | 0 | 0            | 0 | 0            | 0 | 0            |
| 0 | 0.052486469 | 0 | 0            | 0 | 0            | 0 | 0            | 0 | 0            |
| 0 | 0.05465221  | 0 | 0.003522874  | 0 | 0            | 0 | 0            | 0 | 0            |
| 0 | 0           | 0 | 0            | 0 | 0            | 0 | -0.050337679 | 0 | 0            |
| 0 | 0.046152875 | 0 | 0            | 0 | 0            | 0 | 0            | 0 | -0.029946071 |
| 0 | 0.046109497 | 0 | 0            | 0 | 0            | 0 | 0            | 0 | -0.024481502 |
| 0 | 0.080619406 | 0 | 0            | 0 | 0            | 0 | 0            | 0 | 0.95936453   |
| 0 | 0.035607403 | 0 | 0            | 0 | 0.013821875  | 0 | 0            | 0 | 0            |
| 0 | 0.047282677 | 0 | 0.001651049  | 0 | 0            | 0 | 0            | 0 | -0.025202112 |
| 0 | 0.036699462 | 0 | -0.013156784 | 0 | 0.026494384  | 0 | 0            | 0 | 0            |
| 0 | 0.031309909 | 0 | 0            | 0 | 0            | 0 | 0            | 0 | 0            |
| 0 | 0.030413708 | 0 | -0.002773737 | 0 | 0            | 0 | 0            | 0 | 0            |
| 0 | 0           | 0 | -0.026470459 | 0 | 0            | 0 | 0.049827561  | 0 | 0            |
| 0 | 0.037855772 | 0 | 0            | 0 | 0.015032264  | 0 | 0            | 0 | 0            |
| 0 | 0           | 0 | 0            | 0 | 0            | 0 | -0.046907936 | 0 | 0.023440836  |
| 0 | 0           | 0 | -0.016078593 | 0 | 0            | 0 | 0.048082323  | 0 | 0            |
| 0 | 0.03033311  | 0 | -0.008485324 | 0 | 0            | 0 | 0            | 0 | 0            |
| 0 | 0           | 0 | -0.015114716 | 0 | 0            | 0 | 0.049832125  | 0 | 0.014464861  |
| 0 | 0           | 0 | 0            | 0 | 0            | 0 | -0.068295297 | 0 | 0.014468363  |
| 0 | 0           | 0 | 0            | 0 | 0            | 0 | -0.048047141 | 0 | 0            |
| 0 | 0           | 0 | 0            | 0 | 0            | 0 | 0.04703055   | 0 | 0.011817711  |
| 0 | 0           | 0 | -0.022320784 | 0 | 0.012252603  | 0 | 0.051083299  | 0 | 0            |
| 0 | 0           | 0 | -0.015728673 | 0 | 0            | 0 | 0.050280958  | 0 | 0            |
| 0 | 0           | 0 | 0            | 0 | -0.008098602 | 0 | 0.047043898  | 0 | 0            |
| 0 | 0           | 0 | 0            | 0 | 0            | 0 | 0.046875166  | 0 | 0            |
| 0 | 0           | 0 | 0            | 0 | 0            | 0 | -0.068352484 | 0 | 0            |
| 0 | 0           | 0 | 0            | 0 | 0            | 0 | 0.047170139  | 0 | 0            |
| 0 | 0           | 0 | 0            | 0 | -0.009244055 | 0 | 0.048762439  | 0 | 0.017145492  |
| 0 | 0           | 0 | 0            | 0 | 0            | 0 | 0.048512346  | 0 | 0.016455929  |
| 0 | 0           | 0 | 0            | 0 | 0            | 0 | 0.048945904  | 0 | 0            |
| 0 | 0           | 0 | 0            | 0 | -0.008751324 | 0 | 0.049217814  | 0 | 0            |

|   |              |   |              |   |              |   |              |   |              |
|---|--------------|---|--------------|---|--------------|---|--------------|---|--------------|
| 0 | 0            | 0 | 0            | 0 | -0.008286748 | 0 | 0.049147764  | 0 | 0            |
| 0 | 0.076155851  | 0 | 0            | 0 | 0            | 0 | 0            | 0 | 0.96371303   |
| 0 | 0            | 0 | -0.0246829   | 0 | 0            | 0 | 0            | 0 | 0            |
| 0 | 0            | 0 | -0.045679872 | 0 | 0.031416201  | 0 | 0            | 0 | 0            |
| 0 | 0            | 0 | -0.024146329 | 0 | 0            | 0 | 0            | 0 | 0.014140681  |
| 0 | 0            | 0 | -0.014236182 | 0 | 0            | 0 | 0            | 0 | 0.01011242   |
| 0 | 0            | 0 | -0.019417323 | 0 | 0.008988232  | 0 | 0            | 0 | 0            |
| 0 | 0            | 0 | -0.025065255 | 0 | 0            | 0 | 0            | 0 | 0            |
| 0 | 0            | 0 | -0.014886034 | 0 | 0            | 0 | 0            | 0 | 0            |
| 0 | 0            | 0 | 0            | 0 | -0.009514486 | 0 | 0            | 0 | 0.012768712  |
| 0 | 0            | 0 | 0            | 0 | 0            | 0 | 0            | 0 | 0.012190816  |
| 0 | 0            | 0 | 0            | 0 | -0.008897643 | 0 | 0            | 0 | 0            |
| 0 | 0            | 0 | 0            | 0 | -0.008965498 | 0 | 0            | 0 | 0            |
| 0 | 0            | 0 | 0            | 0 | 0            | 0 | 0            | 0 | 0            |
| 0 | 0            | 0 | -0.016768847 | 0 | 0.005590581  | 0 | 0            | 0 | 0.01521354   |
| 0 | 0            | 0 | 0            | 0 | -0.01018986  | 0 | 0            | 0 | 0.018337168  |
| 0 | 0            | 0 | -0.018392118 | 0 | 0.007596685  | 0 | 0            | 0 | 0            |
| 0 | 0            | 0 | 0            | 0 | -0.009681677 | 0 | 0            | 0 | 0            |
| 0 | 0            | 0 | 0            | 0 | 0            | 0 | 0            | 0 | 0.033137351  |
| 0 | 0            | 0 | 0            | 0 | -0.065321037 | 0 | -0.051124836 | 0 | 1.0350314    |
| 0 | 0            | 0 | 0            | 0 | -0.072464899 | 0 | 0            | 0 | 0.98715902   |
| 0 | 0            | 0 | 0            | 0 | 0            | 0 | 0            | 0 | 0            |
| 0 | -0.010952634 | 0 | 0            | 0 | 0            | 0 | 0            | 0 | 1.0191213    |
| 0 | 0            | 0 | 0            | 0 | -0.086003558 | 0 | 0            | 0 | 0.99809772   |
| 0 | 0            | 0 | -0.044345147 | 0 | 0            | 0 | -0.072892677 | 0 | 1.0501709    |
| 0 | -0.030267562 | 0 | 0            | 0 | -0.10708272  | 0 | 0            | 0 | 1.0147464    |
| 0 | 0            | 0 | 0            | 0 | 0            | 0 | -0.066218425 | 0 | 1.0593124    |
| 0 | 0            | 0 | 0            | 0 | 0            | 0 | 0            | 0 | 1.0402342    |
| 0 | 0            | 0 | -0.009071264 | 0 | -0.097677648 | 0 | 0            | 0 | 0.98093552   |
| 0 | 0.088502936  | 0 | 0            | 0 | 0            | 0 | 0            | 0 | 0            |
| 0 | 0.033870315  | 0 | 0            | 0 | 0            | 0 | -0.10744733  | 0 | 1.061319     |
| 0 | 0            | 0 | 0            | 0 | 0            | 0 | -0.084497216 | 0 | 1.0875277    |
| 0 | 0.080970696  | 0 | 0            | 0 | 0            | 0 | 0            | 0 | -0.059730033 |
| 0 | 0            | 0 | 0            | 0 | 0            | 0 | 0            | 0 | 1.0154429    |
| 0 | 0            | 0 | -0.065041088 | 0 | 0            | 0 | 0            | 0 | 0.99890832   |
| 0 | 0            | 0 | 0            | 0 | -0.060010407 | 0 | -0.028888159 | 0 | 0.024841464  |
| 0 | 0            | 0 | -0.040576829 | 0 | 0            | 0 | 0            | 0 | 0.98564277   |
| 0 | 0.017843283  | 0 | 0            | 0 | -0.051126284 | 0 | -0.03512337  | 0 | 0            |
| 0 | 0            | 0 | 0            | 0 | -0.059908264 | 0 | -0.028966405 | 0 | 0            |
| 0 | 0            | 0 | 0.024076487  | 0 | -0.087552303 | 0 | 0            | 0 | 0.029682078  |
| 0 | 0            | 0 | 0            | 0 | -0.067787543 | 0 | 0            | 0 | 0.030133315  |
| 0 | 0            | 0 | 0.006877036  | 0 | -0.064205268 | 0 | -0.027933184 | 0 | 0            |
| 0 | 0            | 0 | 0            | 0 | -0.058864984 | 0 | -0.028403814 | 0 | 0            |
| 0 | -0.006314932 | 0 | 0            | 0 | -0.075457701 | 0 | 0            | 0 | 0.031435224  |
| 0 | 0            | 0 | 0.022229545  | 0 | -0.086404232 | 0 | 0            | 0 | 0            |
| 0 | 0            | 0 | 0            | 0 | -0.068227411 | 0 | 0            | 0 | 0            |
| 0 | 0            | 0 | 0            | 0 | -0.067107318 | 0 | -0.037289139 | 0 | 0.029973704  |

|   |              |   |              |   |              |   |              |              |
|---|--------------|---|--------------|---|--------------|---|--------------|--------------|
| 0 | 0.017522137  | 0 | 0.026448638  | 0 | -0.082989373 | 0 | 0            | 0            |
| 0 | 0.016329424  | 0 | 0            | 0 | -0.062262804 | 0 | 0            | 0            |
| 0 | 0.031337654  | 0 | 0            | 0 | 0            | 0 | 0            | 0.96619989   |
| 0 | 0            | 0 | -0.009747374 | 0 | -0.062181012 | 0 | -0.044929934 | 0.023958469  |
| 0 | -0.005018558 | 0 | 0            | 0 | -0.072666284 | 0 | -0.042585973 | 0.030401055  |
| 0 | 0.001834015  | 0 | 0            | 0 | -0.072697052 | 0 | 0            | 0            |
| 0 | 0            | 0 | 0.013525142  | 0 | -0.078247891 | 0 | 0            | 0            |
| 0 | 0            | 0 | 0            | 0 | -0.067478367 | 0 | -0.038261752 | 0            |
| 0 | 0.016453307  | 0 | 0            | 0 | -0.060388376 | 0 | -0.045871645 | 0            |
| 0 | 0            | 0 | -0.011386456 | 0 | -0.060733686 | 0 | -0.045152843 | 0            |
| 0 | 0.011156359  | 0 | -0.012481618 | 0 | -0.055048688 | 0 | -0.050567872 | 0            |
| 0 | 0.00399962   | 0 | 0            | 0 | -0.06894512  | 0 | -0.046888212 | 0            |
| 0 | 0            | 0 | -0.015561471 | 0 | -0.054551977 | 0 | -0.041317844 | 0            |
| 0 | -0.017789795 | 0 | 0            | 0 | -0.091221963 | 0 | 0            | 0.05029526   |
| 0 | 0            | 0 | -0.009636869 | 0 | -0.078710256 | 0 | 0            | 0.033902143  |
| 0 | 0.035925348  | 0 | 0            | 0 | 0            | 0 | -0.054271695 | 0            |
| 0 | 0.024379784  | 0 | -0.022293986 | 0 | 0            | 0 | -0.059907581 | 0            |
| 0 | 0.046036197  | 0 | 0            | 0 | 0            | 0 | -0.064660338 | 0            |
| 0 | 0            | 0 | -0.011208635 | 0 | -0.078219114 | 0 | 0            | 0            |
| 0 | -0.010938537 | 0 | 0            | 0 | -0.090498485 | 0 | 0            | 0            |
| 0 | 0.020902055  | 0 | -0.039657079 | 0 | 0            | 0 | -0.061471874 | 0            |
| 0 | 0.039130892  | 0 | 0            | 0 | 0            | 0 | -0.063886641 | -0.012458061 |
| 0 | -0.02933002  | 0 | -0.010033865 | 0 | -0.09876495  | 0 | 0            | 0.052506249  |
| 0 | 0            | 0 | -0.033822546 | 0 | 0            | 0 | -0.056627725 | 0.017964219  |
| 0 | 0            | 0 | -0.044713775 | 0 | 0            | 0 | -0.05569395  | 0.022831589  |
| 0 | 0            | 0 | -0.036691779 | 0 | 0            | 0 | -0.050552696 | 0            |
| 0 | 0            | 0 | -0.034845771 | 0 | 0            | 0 | -0.056560981 | 0            |
| 0 | 0            | 0 | -0.045715178 | 0 | 0            | 0 | -0.056400653 | 0            |
| 0 | 0.006921477  | 0 | -0.015309131 | 0 | -0.075299703 | 0 | 0            | 0            |
| 0 | 0.020331171  | 0 | -0.043099684 | 0 | 0            | 0 | -0.074476707 | 0            |
| 0 | 0.012670906  | 0 | -0.044412557 | 0 | 0            | 0 | -0.072361202 | 0.005274341  |
| 0 | -0.022886942 | 0 | -0.011464311 | 0 | -0.097335023 | 0 | 0            | 0            |
| 0 | 0            | 0 | 0            | 0 | 0            | 0 | -0.052430603 | 0.028324649  |
| 0 | 0            | 0 | 0            | 0 | 0            | 0 | -0.053268116 | 0            |
| 0 | -0.027875649 | 0 | -0.095280644 | 0 | 0            | 0 | 0            | 0.99779966   |
| 0 | 0.026442714  | 0 | -0.028388977 | 0 | 0            | 0 | 0            | 0            |
| 0 | 0            | 0 | -0.039212311 | 0 | 0            | 0 | 0            | 0.028549903  |
| 0 | 0.043063486  | 0 | 0            | 0 | 0            | 0 | -0.086058247 | 0            |
| 0 | 0.036028371  | 0 | 0            | 0 | 0            | 0 | -0.083972622 | 0.000495731  |
| 0 | 0            | 0 | -0.04029465  | 0 | 0            | 0 | 0            | 0            |
| 0 | 0.04230004   | 0 | 0            | 0 | 0            | 0 | 0            | 0            |
| 0 | 0.035787994  | 0 | 0            | 0 | 0            | 0 | 0            | 0.00322803   |
| 0 | 0.096723379  | 0 | 0            | 0 | 0            | 0 | 0            | 0.91477406   |
| 0 | 0.050670873  | 0 | 0            | 0 | -0.088083949 | 0 | 0            | 0.96492719   |
| 0 | -0.004139236 | 0 | -0.06657289  | 0 | 0            | 0 | 0            | 0.033257422  |
| 0 | 0            | 0 | 0            | 0 | -0.12163407  | 0 | 0.039431393  | 0.97836871   |
| 0 | 0.021303789  | 0 | -0.03325637  | 0 | 0            | 0 | 0            | 0            |

|   |             |   |              |   |              |             |   |              |
|---|-------------|---|--------------|---|--------------|-------------|---|--------------|
| 0 | 0.013359582 | 0 | -0.03583332  | 0 | 0            | 0           | 0 | 0.006662067  |
| 0 | 0.002261232 | 0 | -0.066657099 | 0 | 0            | 0           | 0 | 0            |
| 0 | 0.091316415 | 0 | 0            | 0 | 0            | 0           | 0 | 0.91956705   |
| 0 | 0           | 0 | 0            | 0 | -0.10302509  | 0           | 0 | 1.014213     |
| 0 | 0           | 0 | 0            | 0 | -0.098120529 | 0           | 0 | 1.0102853    |
| 0 | 0           | 0 | 0            | 0 | -0.092810268 | 0           | 0 | 1.0140603    |
| 0 | 0           | 0 | -0.002136676 | 0 | -0.090636865 | 0           | 0 | 1.0137999    |
| 0 | 0           | 0 | 0            | 0 | -0.092039187 | 0           | 0 | 1.0142358    |
| 0 | 0.045620403 | 0 | 0            | 0 | -0.086328466 | 0           | 0 | 0.96969187   |
| 0 | 0.10610884  | 0 | 0            | 0 | 0            | 0.074667436 | 0 | 0            |
| 0 | 0.021607083 | 0 | 0            | 0 | 0            | 0           | 0 | 1.0175816    |
| 0 | 0           | 0 | 0            | 0 | -0.11702362  | 0.036255803 | 0 | 0.98121189   |
| 0 | 0.099484653 | 0 | 0            | 0 | 0            | 0.075227916 | 0 | -0.086040488 |
| 0 | 0           | 0 | 0            | 0 | -0.098468974 | 0           | 0 | 1.0140593    |
| 0 | 0           | 0 | 0            | 0 | -0.095839368 | 0           | 0 | 1.0103406    |
| 0 | 0           | 0 | 0            | 0 | -0.085606199 | 0           | 0 | 1.0136593    |
| 0 | 0           | 0 | -0.004036374 | 0 | -0.087062907 | 0           | 0 | 1.0132168    |
| 0 | 0.035322752 | 0 | 0            | 0 | -0.073744383 | 0.07599913  | 0 | 0            |
| 0 | 0.10052631  | 0 | 0            | 0 | 0            | 0.073788801 | 0 | 0            |
| 0 | 0           | 0 | -0.040512429 | 0 | 0            | 0           | 0 | 1.0041035    |
| 0 | 0.088838943 | 0 | 0            | 0 | -0.031311769 | 0           | 0 | 0            |
| 0 | 0.10417841  | 0 | 0            | 0 | 0            | 0           | 0 | 0            |
| 0 | 0.097901449 | 0 | -0.014211336 | 0 | 0            | 0           | 0 | 0            |
| 0 | 0.1043371   | 0 | 0            | 0 | 0            | 0           | 0 | 0            |
| 0 | 0.10491725  | 0 | 0            | 0 | 0            | 0           | 0 | 0            |
| 0 | 0           | 0 | 0            | 0 | 0            | 0.059319867 | 0 | 0.95528564   |
| 0 | 0.093952373 | 0 | 0            | 0 | 0            | 0.07428735  | 0 | -0.080004176 |
| 0 | 0           | 0 | 0            | 0 | -0.097838658 | 0.077376166 | 0 | 0            |
| 0 | 0.047353128 | 0 | 0            | 0 | -0.11092471  | 0.029723042 | 0 | 0            |
| 0 | 0           | 0 | 0            | 0 | -0.095949895 | 0.076515579 | 0 | 0            |
| 0 | 0           | 0 | 0            | 0 | -0.096780018 | 0.077492971 | 0 | 0.010270151  |
| 0 | 0.077283336 | 0 | 0            | 0 | -0.039511642 | 0           | 0 | -0.061454783 |
| 0 | 0           | 0 | -0.007592446 | 0 | -0.089008942 | 0.078457383 | 0 | 0            |
| 0 | 0           | 0 | 0            | 0 | -0.096485906 | 0.077928436 | 0 | 0            |
| 0 | 0           | 0 | 0            | 0 | -0.096224026 | 0.077953813 | 0 | 0            |
| 0 | 0.043422366 | 0 | -0.027944375 | 0 | 0            | 0.073981464 | 0 | 0            |
| 0 | 0.034539665 | 0 | 0            | 0 | -0.067449341 | 0.075035445 | 0 | 0            |
| 0 | 0           | 0 | -0.039358378 | 0 | 0            | 0           | 0 | 1.0039218    |
| 0 | 0.038385375 | 0 | 0            | 0 | -0.11414858  | 0.033106082 | 0 | -0.023087101 |
| 0 | 0.08991202  | 0 | -0.01572257  | 0 | 0            | 0           | 0 | -0.077026948 |
| 0 | 0.027177518 | 0 | 0            | 0 | -0.11544616  | 0.041175131 | 0 | 0            |
| 0 | 0.097040195 | 0 | 0            | 0 | 0            | 0           | 0 | -0.085437578 |
| 0 | 0.097105702 | 0 | 0            | 0 | 0            | 0           | 0 | -0.081513265 |
| 0 | 0.02505979  | 0 | 0            | 0 | -0.11747865  | 0.038739151 | 0 | 0            |
| 0 | 0.025000287 | 0 | 0.002275254  | 0 | -0.12062678  | 0.037816886 | 0 | 0            |
| 0 | 0.024738029 | 0 | 0            | 0 | -0.11873392  | 0.037664849 | 0 | 0            |
| 0 | 0.058823842 | 0 | 0            | 0 | -0.088283945 | 0           | 0 | 0            |

|   |             |   |              |   |              |   |             |              |
|---|-------------|---|--------------|---|--------------|---|-------------|--------------|
| 0 | 0.059440787 | 0 | 0            | 0 | -0.086930305 | 0 | 0           | 0            |
| 0 | 0.058813722 | 0 | -0.001272242 | 0 | -0.08686729  | 0 | 0           | 0            |
| 0 | 0.059173147 | 0 | 0            | 0 | -0.087435399 | 0 | 0           | 0            |
| 0 | 0.055190962 | 0 | -0.075747677 | 0 | 0            | 0 | 0           | 0.95023924   |
| 0 | 0.097682989 | 0 | 0            | 0 | 0            | 0 | 0           | -0.081809171 |
| 0 | 0           | 0 | 0            | 0 | 0            | 0 | 0.058810856 | 0.95533302   |
| 0 | 0           | 0 | -0.070462072 | 0 | 0            | 0 | 0.076881731 | 0            |
| 0 | 0.052120984 | 0 | 0            | 0 | 0            | 0 | 0.070153361 | 0            |
| 0 | 0.09874981  | 0 | 0            | 0 | 0            | 0 | 0           | 0            |
| 0 | 0           | 0 | 0            | 0 | 0            | 0 | 0           | 1.0058863    |
| 0 | 0.085741685 | 0 | 0            | 0 | -0.026338089 | 0 | 0           | 0            |
| 0 | 0.052458054 | 0 | 0            | 0 | 0            | 0 | 0.070397333 | 0            |
| 0 | 0           | 0 | 0            | 0 | 0            | 0 | 0           | 1.0118976    |
| 0 | 0.051028252 | 0 | 0            | 0 | -0.088918007 | 0 | 0           | -0.034826746 |
| 0 | 0.036184785 | 0 | 0            | 0 | -0.070045366 | 0 | 0           | 0            |
| 0 | 0.092442638 | 0 | -0.014213205 | 0 | 0            | 0 | 0           | 0            |
| 0 | 0.050614985 | 0 | 0            | 0 | -0.08940662  | 0 | 0           | -0.034441426 |
| 0 | 0.05107128  | 0 | -0.00013361  | 0 | -0.088464484 | 0 | 0           | -0.0349046   |
| 0 | 0.0512621   | 0 | 0            | 0 | -0.088260245 | 0 | 0           | -0.034914122 |
| 0 | 0.052677688 | 0 | 0            | 0 | 0            | 0 | 0.070904261 | 0            |
| 0 | 0.098874037 | 0 | 0            | 0 | 0            | 0 | 0           | 0            |
| 0 | 0           | 0 | 0            | 0 | 0            | 0 | 0           | 1.0124213    |
| 0 | 0           | 0 | 0            | 0 | -0.12639091  | 0 | 0.048054199 | 0.013734562  |
| 0 | 0           | 0 | 0            | 0 | -0.12826051  | 0 | 0.045589259 | 0.012748933  |
| 0 | 0           | 0 | 0            | 0 | -0.12734512  | 0 | 0.046311022 | 0.01272709   |
| 0 | 0           | 0 | -0.000764444 | 0 | -0.12665303  | 0 | 0.046415652 | 0.012581675  |
| 0 | 0.035653302 | 0 | 0            | 0 | -0.068728934 | 0 | 0           | 0            |
| 0 | 0.037185291 | 0 | 0            | 0 | -0.067755598 | 0 | 0           | 0            |
| 0 | 0.037241501 | 0 | 0.001887553  | 0 | -0.069721806 | 0 | 0           | 0            |
| 0 | 0           | 0 | 0            | 0 | -0.12834036  | 0 | 0.045675003 | 0            |
| 0 | 0           | 0 | 0            | 0 | -0.12692518  | 0 | 0.047392806 | 0            |
| 0 | 0           | 0 | -0.0022828   | 0 | -0.12542971  | 0 | 0.046413891 | 0            |
| 0 | 0           | 0 | 0            | 0 | -0.12746198  | 0 | 0.046364269 | 0            |
| 0 | 0           | 0 | -0.006662068 | 0 | -0.12383301  | 0 | 0.044192503 | 0            |
| 0 | 0           | 0 | -0.003368462 | 0 | -0.12452047  | 0 | 0.046227971 | 0            |
| 0 | 0           | 0 | -0.003475239 | 0 | -0.12420919  | 0 | 0.046692004 | 0            |
| 0 | 0           | 0 | 0            | 0 | -0.12838203  | 0 | 0.045522319 | 0            |
| 0 | 0           | 0 | 0            | 0 | -0.12818377  | 0 | 0.046032881 | 0            |
| 0 | 0           | 0 | 0            | 0 | -0.12732748  | 0 | 0.046626482 | 0            |
| 0 | 0.030418903 | 0 | 0            | 0 | -0.095315384 | 0 | 0           | 0            |
| 0 | 0.041591277 | 0 | -0.027447657 | 0 | 0            | 0 | 0.073439214 | 0            |
| 0 | 0.029841732 | 0 | -0.002683552 | 0 | -0.093671115 | 0 | 0           | 0            |
| 0 | 0.030792007 | 0 | 0            | 0 | -0.09442457  | 0 | 0           | 0            |
| 0 | 0           | 0 | 0            | 0 | -0.090894812 | 0 | 0.076486041 | 0            |
| 0 | 0.03208748  | 0 | 0.002872485  | 0 | -0.09285945  | 0 | 0           | 0            |
| 0 | 0.031755331 | 0 | 0            | 0 | -0.090374078 | 0 | 0           | 0            |
| 0 | 0.032012475 | 0 | 0.002683445  | 0 | -0.092470004 | 0 | 0           | 0            |

|   |             |   |              |   |              |   |              |   |              |
|---|-------------|---|--------------|---|--------------|---|--------------|---|--------------|
| 0 | 0           | 0 | 0            | 0 | -0.089379401 | 0 | 0.075368471  | 0 | 0            |
| 0 | 0           | 0 | 0            | 0 | -0.090227566 | 0 | 0.076519691  | 0 | 0.010887436  |
| 0 | 0           | 0 | -0.010050897 | 0 | -0.08012395  | 0 | 0.0776563    | 0 | 0            |
| 0 | 0.036914706 | 0 | -0.046528348 | 0 | 0            | 0 | 0            | 0 | 0            |
| 0 | 0           | 0 | 0            | 0 | -0.089919434 | 0 | 0.076961343  | 0 | 0            |
| 0 | 0.074174253 | 0 | 0            | 0 | -0.034648657 | 0 | 0            | 0 | -0.057858999 |
| 0 | 0           | 0 | -0.06773462  | 0 | 0            | 0 | 0.07624147   | 0 | 0            |
| 0 | 0.050614642 | 0 | -0.074602478 | 0 | 0            | 0 | 0            | 0 | 0.95485094   |
| 0 | 0           | 0 | 0            | 0 | 0            | 0 | 0            | 0 | 1.0049854    |
| 0 | 0.042926357 | 0 | 0            | 0 | -0.10754259  | 0 | 0.02787031   | 0 | 0            |
| 0 | 0.084517553 | 0 | -0.015735046 | 0 | 0            | 0 | 0            | 0 | -0.071168361 |
| 0 | 0.091680671 | 0 | 0            | 0 | 0            | 0 | 0            | 0 | -0.079998345 |
| 0 | 0           | 0 | 0            | 0 | 0            | 0 | 0            | 0 | 1.0114441    |
| 0 | 0           | 0 | -0.070501128 | 0 | 0            | 0 | 0            | 0 | 1.0127256    |
| 0 | 0.091708227 | 0 | 0            | 0 | 0            | 0 | 0            | 0 | -0.075605355 |
| 0 | 0           | 0 | -0.031659373 | 0 | -0.064279657 | 0 | 0            | 0 | 0            |
| 0 | 0.050180999 | 0 | 0            | 0 | 0            | 0 | 0.069666128  | 0 | 0            |
| 0 | 0.033979963 | 0 | 0            | 0 | -0.11080076  | 0 | 0.031269235  | 0 | -0.018107694 |
| 0 | 0.025386872 | 0 | 0            | 0 | -0.111638    | 0 | 0.03784984   | 0 | 0            |
| 0 | 0.050395044 | 0 | 0            | 0 | 0            | 0 | 0.070103139  | 0 | 0            |
| 0 | 0           | 0 | -0.069571648 | 0 | 0            | 0 | -0.017351702 | 0 | 1.0203695    |
| 0 | 0.024032755 | 0 | 0            | 0 | -0.1118536   | 0 | 0.036990212  | 0 | 0            |
| 0 | 0.023215163 | 0 | -0.000531456 | 0 | -0.11402027  | 0 | 0.035053867  | 0 | 0            |
| 0 | 0.055525813 | 0 | 0            | 0 | -0.083105715 | 0 | 0            | 0 | 0            |
| 0 | 0.053630076 | 0 | -0.003647659 | 0 | -0.083069566 | 0 | 0            | 0 | 0            |
| 0 | 0.053869171 | 0 | 0            | 0 | -0.08603416  | 0 | 0            | 0 | 0            |
| 0 | 0           | 0 | 0            | 0 | -0.092777388 | 0 | 0            | 0 | 0            |
| 0 | 0           | 0 | -0.015795352 | 0 | -0.094792183 | 0 | 0            | 0 | 0.010123317  |
| 0 | 0           | 0 | -0.044109444 | 0 | 0            | 0 | 0.074955438  | 0 | 0            |
| 0 | 0           | 0 | -0.016334684 | 0 | -0.096848921 | 0 | 0            | 0 | 0            |
| 0 | 0           | 0 | 0            | 0 | -0.093842688 | 0 | 0            | 0 | 0.012413132  |
| 0 | 0           | 0 | -0.01832911  | 0 | -0.093686587 | 0 | 0            | 0 | 0            |
| 0 | 0           | 0 | -0.017873576 | 0 | -0.093665129 | 0 | 0            | 0 | 0            |
| 0 | 0           | 0 | 0            | 0 | -0.10612137  | 0 | 0            | 0 | 0.011038005  |
| 0 | 0           | 0 | -0.045205491 | 0 | 0            | 0 | 0.076943352  | 0 | 0            |
| 0 | 0           | 0 | 0            | 0 | -0.10392524  | 0 | 0            | 0 | 0.012972732  |
| 0 | 0           | 0 | -0.044372781 | 0 | 0            | 0 | 0.076405249  | 0 | 0            |
| 0 | 0           | 0 | 0            | 0 | -0.093125364 | 0 | 0            | 0 | 0            |
| 0 | 0           | 0 | -0.044438395 | 0 | 0            | 0 | 0.076519219  | 0 | 0.000293517  |
| 0 | 0           | 0 | 0            | 0 | -0.093508815 | 0 | 0            | 0 | 0            |
| 0 | 0           | 0 | -0.08526644  | 0 | 0            | 0 | 0            | 0 | 1.0021514    |
| 0 | 0           | 0 | 0            | 0 | -0.1072228   | 0 | 0            | 0 | 0            |
| 0 | 0.035539163 | 0 | 0            | 0 | -0.063456883 | 0 | 0            | 0 | 0            |
| 0 | 0           | 0 | 0            | 0 | -0.10675527  | 0 | 0            | 0 | 0            |
| 0 | 0           | 0 | -0.08031798  | 0 | 0            | 0 | 0            | 0 | 1.0033146    |
| 0 | 0           | 0 | 0            | 0 | -0.091615572 | 0 | 0            | 0 | 0.00855839   |
| 0 | 0.045206044 | 0 | -0.023856532 | 0 | 0            | 0 | 0            | 0 | 0            |



|   |             |   |              |   |              |   |              |   |              |
|---|-------------|---|--------------|---|--------------|---|--------------|---|--------------|
| 0 | 0           | 0 | 0            | 0 | -0.10395893  | 0 | 0            | 0 | 0            |
| 0 | 0           | 0 | 0            | 0 | -0.099237581 | 0 | 0            | 0 | 0.009976184  |
| 0 | 0           | 0 | 0            | 0 | -0.091029163 | 0 | 0            | 0 | 0            |
| 0 | 0.04412448  | 0 | -0.024336376 | 0 | 0            | 0 | 0            | 0 | 0            |
| 0 | 0           | 0 | -0.004755524 | 0 | -0.086551676 | 0 | 0            | 0 | 0            |
| 0 | 0           | 0 | -0.002108679 | 0 | -0.097235268 | 0 | 0            | 0 | 0.009519765  |
| 0 | 0           | 0 | 0            | 0 | -0.09118721  | 0 | 0            | 0 | 0            |
| 0 | 0.034566036 | 0 | 0            | 0 | -0.062766535 | 0 | 0            | 0 | 0            |
| 0 | 0           | 0 | -0.003829745 | 0 | -0.09705219  | 0 | 0            | 0 | 0            |
| 0 | 0           | 0 | 0            | 0 | -0.10017149  | 0 | 0            | 0 | 0            |
| 0 | 0           | 0 | -0.003643678 | 0 | -0.09684289  | 0 | 0            | 0 | 0            |
| 0 | 0           | 0 | -0.002193643 | 0 | -0.091481257 | 0 | 0            | 0 | 0.012398962  |
| 0 | 0           | 0 | 0            | 0 | -0.092036747 | 0 | 0            | 0 | 0.012743849  |
| 0 | 0.036197012 | 0 | -0.000746063 | 0 | -0.061168762 | 0 | 0            | 0 | 0            |
| 0 | 0           | 0 | -0.002517722 | 0 | -0.0897211   | 0 | 0            | 0 | 0.012275034  |
| 0 | 0.045932839 | 0 | -0.00245609  | 0 | -0.084756398 | 0 | 0            | 0 | -0.029683632 |
| 0 | 0.04671799  | 0 | 0            | 0 | -0.085651777 | 0 | 0            | 0 | -0.029981608 |
| 0 | 0.046011762 | 0 | 0            | 0 | -0.086888402 | 0 | 0            | 0 | -0.029318815 |
| 0 | 0           | 0 | 0            | 0 | -0.12191566  | 0 | 0.044595604  | 0 | 0.014388391  |
| 0 | 0           | 0 | -0.003017924 | 0 | -0.12004699  | 0 | 0.043191899  | 0 | 0.012990979  |
| 0 | 0           | 0 | 0            | 0 | -0.1223215   | 0 | 0.043628281  | 0 | 0.013536997  |
| 0 | 0           | 0 | -0.003780001 | 0 | -0.090198548 | 0 | 0            | 0 | 0            |
| 0 | 0           | 0 | 0            | 0 | -0.091691373 | 0 | 0            | 0 | 0            |
| 0 | 0           | 0 | -0.005053571 | 0 | -0.086545605 | 0 | 0            | 0 | 0            |
| 0 | 0           | 0 | -0.004168633 | 0 | -0.087765344 | 0 | 0            | 0 | 0            |
| 0 | 0           | 0 | -0.004545714 | 0 | -0.1188108   | 0 | 0.043194197  | 0 | 0            |
| 0 | 0           | 0 | 0            | 0 | -0.12244472  | 0 | 0.043939287  | 0 | 0            |
| 0 | 0           | 0 | 0            | 0 | -0.12238751  | 0 | 0.043717542  | 0 | 0            |
| 0 | 0           | 0 | -0.007286384 | 0 | -0.11745243  | 0 | 0.042109509  | 0 | 0            |
| 0 | 0           | 0 | -0.005777736 | 0 | -0.11772196  | 0 | 0.043172445  | 0 | 0            |
| 0 | 0.035604716 | 0 | -0.044418179 | 0 | 0            | 0 | 0            | 0 | 0            |
| 0 | 0           | 0 | 0            | 0 | -0.12245023  | 0 | 0.043568417  | 0 | 0            |
| 0 | 0.092471467 | 0 | 0            | 0 | 0            | 0 | 0            | 0 | 0.93361615   |
| 0 | 0.052556114 | 0 | 0            | 0 | 0            | 0 | 0            | 0 | 0            |
| 0 | 0           | 0 | -0.069701899 | 0 | 0            | 0 | 0            | 0 | 1.0123746    |
| 0 | 0           | 0 | -0.06595834  | 0 | 0            | 0 | 0            | 0 | 0            |
| 0 | 0.028461131 | 0 | -0.003299472 | 0 | -0.089021703 | 0 | 0            | 0 | 0            |
| 0 | 0.029205353 | 0 | 0            | 0 | -0.090623989 | 0 | 0            | 0 | 0            |
| 0 | 0.052003616 | 0 | 0            | 0 | 0            | 0 | 0            | 0 | 0            |
| 0 | 0.029658152 | 0 | 4.92E-05     | 0 | -0.088623903 | 0 | 0            | 0 | 0            |
| 0 | 0           | 0 | -0.068493606 | 0 | 0            | 0 | 0            | 0 | 0            |
| 0 | 0           | 0 | -0.066840793 | 0 | 0            | 0 | 0            | 0 | 0            |
| 0 | 0           | 0 | -0.067272324 | 0 | 0            | 0 | 0            | 0 | -0.00194565  |
| 0 | 0.052281674 | 0 | 0            | 0 | 0            | 0 | 0            | 0 | 0            |
| 0 | 0           | 0 | -0.068415401 | 0 | 0            | 0 | -0.017215648 | 0 | 1.020331     |
| 0 | 0.089490981 | 0 | 0            | 0 | 0            | 0 | -0.073789799 | 0 | 1.0026314    |
| 0 | 0           | 0 | -0.0430347   | 0 | 0            | 0 | 0.074249287  | 0 | 0            |

|   |             |   |              |   |              |              |   |              |
|---|-------------|---|--------------|---|--------------|--------------|---|--------------|
| 0 | 0           | 0 | -0.082286355 | 0 | 0            | 0            | 0 | 1.0027109    |
| 0 | 0           | 0 | -0.044050315 | 0 | 0            | 0.076349765  | 0 | 0            |
| 0 | 0           | 0 | -0.043285639 | 0 | 0            | 0.075915061  | 0 | 0.001153923  |
| 0 | 0           | 0 | -0.033281513 | 0 | -0.056056358 | 0            | 0 | 0            |
| 0 | 0.042022244 | 0 | -0.023889839 | 0 | 0            | 0            | 0 | 0            |
| 0 | 0           | 0 | 0            | 0 | -0.0860224   | 0            | 0 | 0            |
| 0 | 0           | 0 | 0            | 0 | -0.087071824 | 0            | 0 | 0.013034917  |
| 0 | 0           | 0 | -0.015467753 | 0 | -0.090411925 | 0            | 0 | 0.010944264  |
| 0 | 0           | 0 | 0            | 0 | -0.085234976 | 0            | 0 | 0.008714667  |
| 0 | 0           | 0 | -0.015999307 | 0 | -0.092715824 | 0            | 0 | 0            |
| 0 | 0           | 0 | -0.007080798 | 0 | -0.077974316 | 0            | 0 | 0            |
| 0 | 0           | 0 | 0            | 0 | -0.10177614  | 0            | 0 | 0.011649974  |
| 0 | 0           | 0 | -0.017552006 | 0 | -0.089261408 | 0            | 0 | 0            |
| 0 | 0           | 0 | 0            | 0 | -0.084804965 | 0            | 0 | 0            |
| 0 | 0           | 0 | 0            | 0 | -0.086722737 | 0            | 0 | 0            |
| 0 | 0           | 0 | -0.004036497 | 0 | -0.093305482 | 0            | 0 | 0.010088444  |
| 0 | 0           | 0 | 0            | 0 | -0.10239524  | 0            | 0 | 0            |
| 0 | 0           | 0 | -0.005581891 | 0 | -0.092892422 | 0            | 0 | 0            |
| 0 | 0           | 0 | -0.004877283 | 0 | -0.081037909 | 0            | 0 | 0.012395709  |
| 0 | 0.087720585 | 0 | 0            | 0 | 0            | 0            | 0 | 0.93803111   |
| 0 | 0           | 0 | -0.06317199  | 0 | 0            | 0            | 0 | 0            |
| 0 | 0           | 0 | -0.006528217 | 0 | -0.07908073  | 0            | 0 | 0            |
| 0 | 0.049777891 | 0 | 0            | 0 | 0            | 0            | 0 | 0            |
| 0 | 0           | 0 | -0.065571556 | 0 | 0            | 0            | 0 | 0            |
| 0 | 0           | 0 | -0.064364406 | 0 | 0            | 0            | 0 | -0.000697476 |
| 0 | 0           | 0 | 0            | 0 | 0            | 0.069198735  | 0 | 0            |
| 0 | 0.072758273 | 0 | -0.060413966 | 0 | 0            | 0            | 0 | 0            |
| 0 | 0           | 0 | 0            | 0 | 0            | 0.070409976  | 0 | 0.007403295  |
| 0 | 0           | 0 | 0            | 0 | 0            | 0.070627138  | 0 | 0            |
| 0 | 0           | 0 | 0            | 0 | 0            | 0.069453492  | 0 | 0            |
| 0 | 0           | 0 | 0            | 0 | 0            | 0.069527656  | 0 | 0.00423786   |
| 0 | 0           | 0 | 0            | 0 | 0            | 0.069656786  | 0 | 0            |
| 0 | 0           | 0 | 0            | 0 | 0            | 0.070825758  | 0 | 0            |
| 0 | 0.084447173 | 0 | 0            | 0 | 0            | -0.072754746 | 0 | 1.0063034    |
| 0 | 0           | 0 | 0            | 0 | 0            | 0.070778761  | 0 | 0.007641983  |
| 0 | 0           | 0 | -0.041663424 | 0 | 0            | 0            | 0 | 0            |
| 0 | 0           | 0 | 0            | 0 | 0            | 0.071182296  | 0 | 0            |
| 0 | 0           | 0 | -0.040566989 | 0 | 0            | 0            | 0 | 0            |
| 0 | 0           | 0 | -0.040851691 | 0 | 0            | 0            | 0 | -0.001495684 |
| 0 | 0.072519332 | 0 | -0.058191819 | 0 | 0            | -0.026984618 | 0 | 0            |
| 0 | 0           | 0 | -0.041411487 | 0 | 0            | 0            | 0 | 0            |
| 0 | 0           | 0 | -0.040603274 | 0 | 0            | 0            | 0 | 0.003494402  |
| 0 | 0.06526004  | 0 | -0.060518285 | 0 | 0            | 0            | 0 | -0.050286298 |
| 0 | 0.090968957 | 0 | 0            | 0 | 0            | 0            | 0 | 0.96671593   |
| 0 | 0.071707542 | 0 | -0.059972294 | 0 | 0            | 0            | 0 | 0            |
| 0 | 0           | 0 | 0            | 0 | 0            | 0.068607996  | 0 | 0            |
| 0 | 0           | 0 | 0            | 0 | 0            | 0.068897758  | 0 | 0.004571913  |

|   |             |   |              |   |   |   |              |   |              |
|---|-------------|---|--------------|---|---|---|--------------|---|--------------|
| 0 | 0           | 0 | 0            | 0 | 0 | 0 | 0.069032023  | 0 | 0            |
| 0 | 0           | 0 | 0            | 0 | 0 | 0 | 0.069931255  | 0 | 0.008076842  |
| 0 | 0           | 0 | 0            | 0 | 0 | 0 | 0.070355146  | 0 | 0            |
| 0 | 0.064356708 | 0 | -0.05936956  | 0 | 0 | 0 | -0.025574184 | 0 | -0.057533201 |
| 0 | 0.063156494 | 0 | -0.075808637 | 0 | 0 | 0 | 0            | 0 | 0            |
| 0 | 0           | 0 | -0.04053885  | 0 | 0 | 0 | 0            | 0 | 0            |
| 0 | 0           | 0 | -0.039727534 | 0 | 0 | 0 | 0            | 0 | -0.000978808 |
| 0 | 0.067297909 | 0 | -0.060391904 | 0 | 0 | 0 | 0            | 0 | 0            |
| 0 | 0.063210048 | 0 | -0.062077859 | 0 | 0 | 0 | 0            | 0 | -0.057037862 |
| 0 | 0.038422225 | 0 | -0.057987734 | 0 | 0 | 0 | -0.006443532 | 0 | 0            |
| 0 | 0.036768305 | 0 | -0.064718187 | 0 | 0 | 0 | 0            | 0 | 0            |
| 0 | 0.037966055 | 0 | -0.06073584  | 0 | 0 | 0 | 0            | 0 | 0            |
| 0 | 0.067425886 | 0 | -0.057901882 | 0 | 0 | 0 | -0.02595442  | 0 | 0            |
| 0 | 0.055615257 | 0 | -0.076049775 | 0 | 0 | 0 | 0            | 0 | -0.052301433 |
| 0 | 0           | 0 | 0            | 0 | 0 | 0 | 0            | 0 | 0            |
| 0 | 0           | 0 | 0            | 0 | 0 | 0 | 0            | 0 | 0.005213361  |
| 0 | 0.059876675 | 0 | -0.060495334 | 0 | 0 | 0 | 0            | 0 | -0.045029775 |
| 0 | 0           | 0 | 0            | 0 | 0 | 0 | 0            | 0 | 0            |
| 0 | 0.085524499 | 0 | 0            | 0 | 0 | 0 | 0            | 0 | 0.97108903   |
| 0 | 0.10218425  | 0 | 0            | 0 | 0 | 0 | 0            | 0 | 0            |
| 0 | 0.10086924  | 0 | 0            | 0 | 0 | 0 | -0.035607847 | 0 | 0            |
| 0 | 0           | 0 | 0            | 0 | 0 | 0 | 0            | 0 | 0.00522851   |
| 0 | 0           | 0 | 0            | 0 | 0 | 0 | 0            | 0 | 0            |
| 0 | 0.067491807 | 0 | -0.05820229  | 0 | 0 | 0 | 0            | 0 | 0            |
| 0 | 0           | 0 | 0            | 0 | 0 | 0 | 0            | 0 | 0.009735523  |
| 0 | 0           | 0 | 0            | 0 | 0 | 0 | 0            | 0 | 0            |
| 0 | 0.031261122 | 0 | -0.064288899 | 0 | 0 | 0 | -0.021819522 | 0 | 0            |
| 0 | 0.031679286 | 0 | -0.063093591 | 0 | 0 | 0 | -0.021180687 | 0 | 0            |
| 0 | 0.059345643 | 0 | -0.05907424  | 0 | 0 | 0 | -0.024567266 | 0 | -0.052091361 |
| 0 | 0           | 0 | 0            | 0 | 0 | 0 | -0.040113677 | 0 | 1.0605747    |
| 0 | 0.029146632 | 0 | -0.070316486 | 0 | 0 | 0 | 0            | 0 | 0            |
| 0 | 0.036121733 | 0 | -0.057714984 | 0 | 0 | 0 | -0.007002312 | 0 | 0            |
| 0 | 0.05903825  | 0 | -0.060348428 | 0 | 0 | 0 | 0            | 0 | -0.052163538 |
| 0 | 0.034974307 | 0 | -0.0627399   | 0 | 0 | 0 | 0            | 0 | 0            |
| 0 | 0           | 0 | 0            | 0 | 0 | 0 | 0            | 0 | 0.005549668  |
| 0 | 0.094769091 | 0 | 0            | 0 | 0 | 0 | 0            | 0 | -0.065758919 |
| 0 | 0           | 0 | 0            | 0 | 0 | 0 | 0            | 0 | 0            |
| 0 | 0           | 0 | 0            | 0 | 0 | 0 | 0            | 0 | 1.0383773    |
| 0 | 0           | 0 | -0.08272009  | 0 | 0 | 0 | -0.00788327  | 0 | 0            |
| 0 | 0           | 0 | -0.083402921 | 0 | 0 | 0 | 0            | 0 | 0.005421553  |
| 0 | 0           | 0 | -0.084794489 | 0 | 0 | 0 | 0            | 0 | 0            |
| 0 | 0           | 0 | -0.084355152 | 0 | 0 | 0 | 0            | 0 | 0            |
| 0 | 0.093248664 | 0 | 0            | 0 | 0 | 0 | -0.03515544  | 0 | -0.073820197 |
| 0 | 0           | 0 | -0.07039546  | 0 | 0 | 0 | -0.002211709 | 0 | 0.00574939   |
| 0 | 0           | 0 | -0.071255247 | 0 | 0 | 0 | 0            | 0 | 0.005868826  |
| 0 | 0           | 0 | -0.071474129 | 0 | 0 | 0 | -0.00266803  | 0 | 0            |
| 0 | 0           | 0 | -0.071196921 | 0 | 0 | 0 | -0.00247045  | 0 | 0            |

|   |             |   |              |   |             |              |   |              |
|---|-------------|---|--------------|---|-------------|--------------|---|--------------|
| 0 | 0           | 0 | -0.072509429 | 0 | 0           | 0            | 0 | 0            |
| 0 | 0           | 0 | 0            | 0 | 0           | -0.038802454 | 0 | 1.0590914    |
| 0 | 0.099950158 | 0 | 0            | 0 | 0           | -0.049057557 | 0 | 0            |
| 0 | 0           | 0 | 0            | 0 | 0           | -0.050925803 | 0 | 1.0829915    |
| 0 | 0.10043409  | 0 | 0            | 0 | 0           | 0            | 0 | 0            |
| 0 | 0           | 0 | -0.082990683 | 0 | 0           | -0.017897593 | 0 | 0            |
| 0 | 0.095936073 | 0 | 0            | 0 | 0           | -0.034020266 | 0 | 0            |
| 0 | 0.097030261 | 0 | 0            | 0 | 0           | 0            | 0 | 0            |
| 0 | 0           | 0 | -0.081487093 | 0 | 0           | -0.018009848 | 0 | 0            |
| 0 | 0           | 0 | -0.08169305  | 0 | 0           | -0.018126338 | 0 | -0.001285671 |
| 0 | 0.029971273 | 0 | -0.062351097 | 0 | 0           | -0.020558548 | 0 | 0            |
| 0 | 0           | 0 | -0.073834421 | 0 | 0           | -0.012053847 | 0 | 0            |
| 0 | 0           | 0 | -0.073021374 | 0 | 0           | -0.01259275  | 0 | 0.000132663  |
| 0 | 0           | 0 | -0.087129071 | 0 | 0           | 0            | 0 | 0            |
| 0 | 0           | 0 | 0            | 0 | 0           | 0            | 0 | 1.0373923    |
| 0 | 0           | 0 | -0.085905574 | 0 | 0           | 0            | 0 | -0.002084588 |
| 0 | 0           | 0 | -0.079973968 | 0 | 0           | -0.007708455 | 0 | 0            |
| 0 | 0           | 0 | 0            | 0 | 0           | 0            | 0 | 1.0269128    |
| 0 | 0           | 0 | -0.080518933 | 0 | 0           | 0            | 0 | 0.006025046  |
| 0 | 0.09220256  | 0 | 0            | 0 | 0           | -0.047598572 | 0 | -0.062149943 |
| 0 | 0           | 0 | -0.081900229 | 0 | 0           | 0            | 0 | 0            |
| 0 | 0           | 0 | 0            | 0 | 0           | -0.070415588 | 0 | 1.0895305    |
| 0 | 0           | 0 | 0            | 0 | 0           | -0.051015897 | 0 | 1.0822603    |
| 0 | 0.089685786 | 0 | 0            | 0 | 0           | 0            | 0 | -0.06096809  |
| 0 | 0.05827879  | 0 | 0            | 0 | 0           | -0.020330354 | 0 | 0            |
| 0 | 0.093050891 | 0 | 0            | 0 | 0           | 0            | 0 | -0.07368381  |
| 0 | 0.088404061 | 0 | 0            | 0 | 0           | -0.033618237 | 0 | -0.068631021 |
| 0 | 0           | 0 | -0.069376883 | 0 | 0           | -0.002796585 | 0 | 0.006228469  |
| 0 | 0           | 0 | -0.070457208 | 0 | 0           | -0.003240392 | 0 | 0            |
| 0 | 0           | 0 | -0.080251669 | 0 | 0           | -0.016755359 | 0 | 0            |
| 0 | 0           | 0 | -0.078969546 | 0 | 0           | -0.017000241 | 0 | -0.000201309 |
| 0 | 0.097825066 | 0 | 0            | 0 | 0           | -0.072442285 | 0 | 0            |
| 0 | 0.059652889 | 0 | 0            | 0 | 0           | 0            | 0 | 0            |
| 0 | 0.069213547 | 0 | 0            | 0 | 0.039833739 | 0            | 0 | 0.91515188   |
| 0 | 0.044643897 | 0 | 0            | 0 | 0           | 0.036398976  | 0 | 0.90241944   |
| 0 | 0.094565883 | 0 | 0            | 0 | 0           | -0.049223498 | 0 | 0            |
| 0 | 0.044844334 | 0 | 0            | 0 | 0           | 0            | 0 | 0.93048473   |
| 0 | 0.044795951 | 0 | 0            | 0 | 0           | 0            | 0 | 0.9378459    |
| 0 | 0.052797691 | 0 | 0            | 0 | 0           | -0.035150696 | 0 | 0            |
| 0 | 0.046103988 | 0 | 0.001926291  | 0 | 0           | 0            | 0 | 0.93749484   |
| 0 | 0.056021693 | 0 | 0            | 0 | 0           | -0.020019284 | 0 | 0            |
| 0 | 0.089902785 | 0 | 0            | 0 | 0           | -0.071895299 | 0 | -0.069836223 |
| 0 | 0.086893974 | 0 | 0            | 0 | 0           | -0.047774388 | 0 | -0.056916253 |
| 0 | 0.059179427 | 0 | 0            | 0 | 0           | -0.042879171 | 0 | 0            |
| 0 | 0           | 0 | -0.014215624 | 0 | 0           | 0.038175685  | 0 | 0.94517313   |
| 0 | 0           | 0 | 0            | 0 | 0           | 0.035422201  | 0 | 0.94495465   |
| 0 | 0.099065381 | 0 | 0            | 0 | 0           | 0            | 0 | 0            |

|   |             |   |              |   |              |   |              |   |              |
|---|-------------|---|--------------|---|--------------|---|--------------|---|--------------|
| 0 | 0           | 0 | 0            | 0 | 0            | 0 | 0.03687276   | 0 | 0.95001815   |
| 0 | 0           | 0 | 0            | 0 | -0.008174139 | 0 | 0.037153271  | 0 | 0.94959899   |
| 0 | 0           | 0 | 0            | 0 | 0            | 0 | 0            | 0 | 1.0563589    |
| 0 | 0           | 0 | -0.023035172 | 0 | 0            | 0 | 0            | 0 | 0.97885141   |
| 0 | 0           | 0 | -0.013557362 | 0 | 0            | 0 | 0            | 0 | 0.97506592   |
| 0 | 0           | 0 | 0            | 0 | 0            | 0 | 0            | 0 | 0.97879481   |
| 0 | 0           | 0 | 0            | 0 | -0.0082799   | 0 | 0            | 0 | 0.9784327    |
| 0 | 0           | 0 | -0.016673337 | 0 | 0.006756118  | 0 | 0            | 0 | 0.9829119    |
| 0 | 0.091528346 | 0 | 0            | 0 | 0            | 0 | 0            | 0 | -0.051391897 |
| 0 | 0           | 0 | 0            | 0 | -0.00892072  | 0 | 0            | 0 | 0.98574599   |
| 0 | 0.080407514 | 0 | 0            | 0 | 0.047520727  | 0 | 0.04747111   | 0 | 0            |
| 0 | 0           | 0 | 0            | 0 | 0            | 0 | -0.024704964 | 0 | 0.019715791  |
| 0 | 0           | 0 | 0            | 0 | 0            | 0 | -0.025477453 | 0 | 0            |
| 0 | 0           | 0 | 0            | 0 | 0            | 0 | -0.026799352 | 0 | 0            |
| 0 | 0           | 0 | 0            | 0 | 0            | 0 | -0.034839858 | 0 | 0.01369635   |
| 0 | 0           | 0 | 0            | 0 | 0            | 0 | 0            | 0 | 0.022405465  |
| 0 | 0.069713972 | 0 | 0            | 0 | 0.039504996  | 0 | 0.048101126  | 0 | -0.049675317 |
| 0 | 0.051589421 | 0 | 0            | 0 | 0            | 0 | 0.045536783  | 0 | 0            |
| 0 | 0           | 0 | 0            | 0 | 0            | 0 | -0.034799025 | 0 | 0            |
| 0 | 0.081231304 | 0 | 0            | 0 | 0.047889031  | 0 | 0            | 0 | 0            |
| 0 | 0.082116002 | 0 | -0.020163169 | 0 | 0.06671331   | 0 | 0            | 0 | 0            |
| 0 | 0           | 0 | 0            | 0 | 0            | 0 | 0            | 0 | 0            |
| 0 | 0.051602831 | 0 | 0            | 0 | 0            | 0 | 0.047318667  | 0 | 0            |
| 0 | 0           | 0 | 0            | 0 | 0            | 0 | -0.024112721 | 0 | 0.019825655  |
| 0 | 0.052857261 | 0 | 0.001917596  | 0 | 0            | 0 | 0.047489415  | 0 | 0            |
| 0 | 0.080933357 | 0 | 0            | 0 | 0.047153993  | 0 | 0            | 0 | 0            |
| 0 | 0.045594264 | 0 | 0            | 0 | 0            | 0 | 0.046102724  | 0 | -0.029762481 |
| 0 | 0           | 0 | 0            | 0 | 0            | 0 | -0.024874225 | 0 | 0            |
| 0 | 0.045539775 | 0 | 0            | 0 | 0            | 0 | 0.04760727   | 0 | -0.025198209 |
| 0 | 0.03538447  | 0 | -0.015472815 | 0 | 0.028239677  | 0 | 0.048635792  | 0 | 0            |
| 0 | 0.045837627 | 0 | 0.000122558  | 0 | 0            | 0 | 0.047922252  | 0 | -0.025358861 |
| 0 | 0.035202861 | 0 | 0            | 0 | 0.014041338  | 0 | 0.046291827  | 0 | 0            |
| 0 | 0.036901021 | 0 | 0            | 0 | 0.014950057  | 0 | 0.04721102   | 0 | 0            |
| 0 | 0.030861808 | 0 | 0            | 0 | 0            | 0 | 0.045957887  | 0 | 0            |
| 0 | 0.029451708 | 0 | -0.004107774 | 0 | 0            | 0 | 0.046490965  | 0 | 0            |
| 0 | 0.070094982 | 0 | 0            | 0 | 0.039501499  | 0 | 0            | 0 | -0.054368785 |
| 0 | 0.028908613 | 0 | -0.009783403 | 0 | 0            | 0 | 0.047672095  | 0 | 0            |
| 0 | 0.070856411 | 0 | -0.018423499 | 0 | 0.056668187  | 0 | 0            | 0 | -0.053042839 |
| 0 | 0           | 0 | 0            | 0 | 0            | 0 | -0.046922333 | 0 | 0.023229305  |
| 0 | 0.052215519 | 0 | 0            | 0 | 0            | 0 | 0            | 0 | 0            |
| 0 | 0.054106622 | 0 | 0.003120802  | 0 | 0            | 0 | 0            | 0 | 0            |
| 0 | 0.069606436 | 0 | 0            | 0 | 0.038642166  | 0 | 0            | 0 | -0.048343171 |
| 0 | 0           | 0 | 0            | 0 | 0            | 0 | -0.048063142 | 0 | 0            |
| 0 | 0.052153606 | 0 | -0.000595994 | 0 | 0            | 0 | 0            | 0 | 0            |
| 0 | 0.033229567 | 0 | -0.032242575 | 0 | 0.040522737  | 0 | 0            | 0 | 0            |
| 0 | 0.045922954 | 0 | 0            | 0 | 0            | 0 | 0            | 0 | -0.02970216  |
| 0 | 0.046852946 | 0 | 0.001298167  | 0 | 0            | 0 | 0            | 0 | -0.030399474 |

|   |              |   |              |   |              |   |              |              |
|---|--------------|---|--------------|---|--------------|---|--------------|--------------|
| 0 | 0.080387154  | 0 | 0            | 0 | 0            | 0 | 0            | 0.95998888   |
| 0 | 0            | 0 | -0.047613198 | 0 | 0.033674844  | 0 | 0.050808028  | 0            |
| 0 | 0            | 0 | -0.025366944 | 0 | 0            | 0 | 0.047620962  | 0            |
| 0 | 0.034086394  | 0 | -0.013221392 | 0 | 0.024824222  | 0 | 0            | 0            |
| 0 | 0.044135019  | 0 | -0.003519319 | 0 | 0            | 0 | 0            | -0.023195596 |
| 0 | 0.03537698   | 0 | 0            | 0 | 0.013427024  | 0 | 0            | 0            |
| 0 | 0            | 0 | -0.024822837 | 0 | 0            | 0 | 0.049197032  | 0.012761882  |
| 0 | 0.027914538  | 0 | -0.008988458 | 0 | 0            | 0 | 0            | 0            |
| 0 | 0            | 0 | -0.025698107 | 0 | 0            | 0 | 0.049604948  | 0            |
| 0 | 0            | 0 | -0.015258098 | 0 | 0            | 0 | 0.047922299  | 0.009630725  |
| 0 | 0            | 0 | -0.021596473 | 0 | 0.011455005  | 0 | 0.048570642  | 0            |
| 0 | 0            | 0 | -0.015877286 | 0 | 0            | 0 | 0.048072934  | 0            |
| 0 | 0            | 0 | -0.019323141 | 0 | 0.008532613  | 0 | 0.050233714  | 0.013350089  |
| 0 | 0            | 0 | 0            | 0 | -0.009009071 | 0 | 0.046886715  | 0.012407048  |
| 0 | 0            | 0 | 0            | 0 | 0            | 0 | 0.04673217   | 0.011856788  |
| 0 | 0            | 0 | -0.02088935  | 0 | 0.010467406  | 0 | 0.05075627   | 0            |
| 0 | 0            | 0 | 0            | 0 | -0.008375279 | 0 | 0.046732725  | 0            |
| 0 | 0            | 0 | 0            | 0 | -0.008484206 | 0 | 0.047042638  | 0            |
| 0 | 0            | 0 | 0            | 0 | 0            | 0 | 0.046875627  | 0            |
| 0 | 0            | 0 | 0            | 0 | -0.009564331 | 0 | 0.048330583  | 0.017042933  |
| 0 | 0            | 0 | -0.042906889 | 0 | 0.028911916  | 0 | 0            | 0            |
| 0 | 0            | 0 | 0            | 0 | -0.009071301 | 0 | 0.048783311  | 0            |
| 0 | 0            | 0 | -0.023689006 | 0 | 0            | 0 | 0            | 0.008887445  |
| 0 | 0            | 0 | -0.041811036 | 0 | 0.027274384  | 0 | 0            | 0.00986475   |
| 0 | 0            | 0 | -0.024541356 | 0 | 0            | 0 | 0            | 0            |
| 0 | 0            | 0 | -0.044771044 | 0 | 0.030439895  | 0 | 0            | 0            |
| 0 | 0            | 0 | 0            | 0 | -0.055620725 | 0 | -0.036355209 | 1.0227332    |
| 0 | 0            | 0 | -0.017453806 | 0 | 0.006535202  | 0 | 0            | 0.009225693  |
| 0 | 0            | 0 | -0.019134075 | 0 | 0.008631529  | 0 | 0            | 0            |
| 0 | 0            | 0 | 0            | 0 | -0.009841164 | 0 | 0            | 0.012835478  |
| 0 | 0            | 0 | 0            | 0 | -0.009290343 | 0 | 0            | 0            |
| 0 | 0            | 0 | 0            | 0 | -0.062233049 | 0 | -0.044391878 | 1.0347143    |
| 0 | 0            | 0 | -0.009644132 | 0 | -0.05697664  | 0 | -0.051194974 | 1.0330505    |
| 0 | 0            | 0 | 0            | 0 | -0.066560713 | 0 | 0            | 0.99502731   |
| 0 | 0            | 0 | 0.024897077  | 0 | -0.087130784 | 0 | 0            | 0.99333557   |
| 0 | -0.001906989 | 0 | 0            | 0 | -0.066103587 | 0 | -0.050257446 | 1.0361507    |
| 0 | -0.007279557 | 0 | 0            | 0 | -0.074873163 | 0 | 0            | 0.99456424   |
| 0 | 0.038310439  | 0 | 0            | 0 | 0            | 0 | -0.06912745  | 1.0207112    |
| 0 | 0            | 0 | -0.031841386 | 0 | 0            | 0 | -0.062146815 | 1.0444624    |
| 0 | 0            | 0 | -0.041697501 | 0 | 0            | 0 | -0.061412338 | 1.0483052    |
| 0 | -0.01857416  | 0 | 0            | 0 | -0.090372975 | 0 | 0            | 1.0150169    |
| 0 | 0            | 0 | -0.00948572  | 0 | -0.077808924 | 0 | 0            | 0.99611038   |
| 0 | 0.0140324    | 0 | -0.040692781 | 0 | 0            | 0 | -0.077180999 | 1.0403123    |
| 0 | 0            | 0 | 0            | 0 | 0            | 0 | -0.058645754 | 1.0587537    |
| 0 | -0.03049514  | 0 | -0.009902269 | 0 | -0.098583683 | 0 | 0            | 1.0128776    |
| 0 | 0.035411021  | 0 | 0            | 0 | 0            | 0 | -0.088076183 | 1.0532498    |
| 0 | 0            | 0 | -0.038023896 | 0 | 0            | 0 | 0            | 1.0012901    |

|   |              |   |              |   |              |   |              |              |
|---|--------------|---|--------------|---|--------------|---|--------------|--------------|
| 0 | 0.034548186  | 0 | 0            | 0 | 0            | 0 | 0            | 0.97895524   |
| 0 | -0.005047332 | 0 | -0.065934437 | 0 | 0            | 0 | 0            | 1.003524     |
| 0 | 0            | 0 | 0.014652822  | 0 | -0.070333563 | 0 | -0.025231428 | 0.02739352   |
| 0 | 0            | 0 | 0            | 0 | -0.058529747 | 0 | -0.025247272 | 0.027482451  |
| 0 | 0.012497973  | 0 | -0.035072136 | 0 | 0            | 0 | 0            | 0.97413385   |
| 0 | 0.021252698  | 0 | 0.017321567  | 0 | -0.061675295 | 0 | -0.031940646 | 0            |
| 0 | 0.006439598  | 0 | 0            | 0 | -0.056879309 | 0 | -0.031050802 | 0.018889282  |
| 0 | 0.020083344  | 0 | 0            | 0 | -0.048572773 | 0 | -0.032325327 | 0            |
| 0 | 0.016148076  | 0 | 0            | 0 | -0.051993801 | 0 | -0.034496912 | 0            |
| 0 | 0            | 0 | 0.019621973  | 0 | -0.080426846 | 0 | 0            | 0.032547231  |
| 0 | 0            | 0 | 0.012547689  | 0 | -0.068758087 | 0 | -0.025818333 | 0            |
| 0 | 0            | 0 | 0            | 0 | -0.058706818 | 0 | -0.025971182 | 0            |
| 0 | 0.000512766  | 0 | 0.024252996  | 0 | -0.087486617 | 0 | 0            | 0.029242467  |
| 0 | -0.001370954 | 0 | 0            | 0 | -0.068325117 | 0 | 0            | 0.031320394  |
| 0 | 0            | 0 | 0.006228963  | 0 | -0.063366468 | 0 | -0.027204337 | 0            |
| 0 | 0            | 0 | 0.018180055  | 0 | -0.079938919 | 0 | 0            | 0            |
| 0 | 0.020810777  | 0 | 0.022995982  | 0 | -0.075261476 | 0 | 0            | 0            |
| 0 | 0.00895548   | 0 | 0.025333096  | 0 | -0.085262652 | 0 | 0            | 0            |
| 0 | 0            | 0 | -0.009860757 | 0 | -0.058563087 | 0 | -0.037337412 | 0.028127541  |
| 0 | 0.006802853  | 0 | 0            | 0 | -0.065546659 | 0 | 0            | 0            |
| 0 | -0.001586153 | 0 | 0            | 0 | -0.067805964 | 0 | -0.036680314 | 0.031368622  |
| 0 | -0.005264678 | 0 | -0.009862608 | 0 | -0.064232217 | 0 | -0.042547568 | 0.028766861  |
| 0 | 0            | 0 | -0.01148811  | 0 | -0.05751333  | 0 | -0.038330379 | 0            |
| 0 | 0.0149445    | 0 | -0.012599958 | 0 | -0.050099866 | 0 | -0.045203578 | 0            |
| 0 | 0.007322246  | 0 | 0            | 0 | -0.064221141 | 0 | -0.04111278  | 0            |
| 0 | 0.003705238  | 0 | -0.011301633 | 0 | -0.059275853 | 0 | -0.046849746 | 0            |
| 0 | 0.027908544  | 0 | -0.020958324 | 0 | 0            | 0 | -0.051602278 | 0            |
| 0 | -0.018039812 | 0 | -0.010053197 | 0 | -0.08259726  | 0 | 0            | 0.048629885  |
| 0 | 0.046541744  | 0 | 0            | 0 | 0            | 0 | -0.05651703  | 0            |
| 0 | 0.035929728  | 0 | -0.018265662 | 0 | 0            | 0 | -0.061551501 | 0            |
| 0 | 0.039687931  | 0 | 0            | 0 | 0            | 0 | -0.055022606 | -0.007574001 |
| 0 | 0.027342373  | 0 | -0.021270315 | 0 | 0            | 0 | -0.060302282 | -0.005008363 |
| 0 | 0            | 0 | -0.033794188 | 0 | 0            | 0 | -0.048188305 | 0.023078175  |
| 0 | -0.011215658 | 0 | -0.011487482 | 0 | -0.080635747 | 0 | 0            | 0            |
| 0 | 0.015873271  | 0 | -0.04039091  | 0 | 0            | 0 | -0.059685032 | 0.009538263  |
| 0 | 0.02334581   | 0 | -0.039286259 | 0 | 0            | 0 | -0.062365504 | 0            |
| 0 | 0            | 0 | -0.034828023 | 0 | 0            | 0 | -0.048913766 | 0            |
| 0 | 0.098526674  | 0 | 0            | 0 | 0            | 0 | 0.063662256  | 0.85127312   |
| 0 | 0.019111702  | 0 | -0.030698398 | 0 | 0            | 0 | 0            | 0.012891204  |
| 0 | 0.027029499  | 0 | -0.028201535 | 0 | 0            | 0 | 0            | 0            |
| 0 | 0.076351269  | 0 | 0            | 0 | -0.040005628 | 0 | 0            | 0.93605165   |
| 0 | 0.089260216  | 0 | -0.015665469 | 0 | 0            | 0 | 0            | 0.91898795   |
| 0 | 0.092991066  | 0 | 0            | 0 | 0            | 0 | 0.062729508  | 0.8571652    |
| 0 | 0.096390211  | 0 | 0            | 0 | 0            | 0 | 0            | 0.90916637   |
| 0 | 0.096434072  | 0 | 0            | 0 | 0            | 0 | 0            | 0.91432057   |
| 0 | 0.096992512  | 0 | 0            | 0 | 0            | 0 | 0            | 0.91404105   |
| 0 | 0.04106281   | 0 | 0            | 0 | -0.10746872  | 0 | 0.02508313   | 0.9514467    |

|   |             |   |              |   |              |   |             |   |              |
|---|-------------|---|--------------|---|--------------|---|-------------|---|--------------|
| 0 | 0           | 0 | 0            | 0 | -0.095959708 | 0 | 0.065870741 | 0 | 0.95047822   |
| 0 | 0.0506245   | 0 | 0            | 0 | -0.088397578 | 0 | 0           | 0 | 0.96478546   |
| 0 | 0.050190401 | 0 | 0            | 0 | -0.08894314  | 0 | 0           | 0 | 0.96539106   |
| 0 | 0.051093731 | 0 | 0            | 0 | -0.087353021 | 0 | 0           | 0 | 0.96499785   |
| 0 | 0.050675888 | 0 | 0.000109055  | 0 | -0.088176928 | 0 | 0           | 0 | 0.96494642   |
| 0 | 0           | 0 | 0            | 0 | -0.12345742  | 0 | 0.037749605 | 0 | 0.97988414   |
| 0 | 0           | 0 | 0            | 0 | -0.12110385  | 0 | 0.040355926 | 0 | 0.97838088   |
| 0 | 0           | 0 | 0            | 0 | -0.12165445  | 0 | 0.039285651 | 0 | 0.97842371   |
| 0 | 0           | 0 | -0.000761394 | 0 | -0.12096321  | 0 | 0.039406181 | 0 | 0.97822486   |
| 0 | 0.073205943 | 0 | 0            | 0 | -0.035162928 | 0 | 0           | 0 | 0.93852629   |
| 0 | 0.08383372  | 0 | -0.015696647 | 0 | 0            | 0 | 0           | 0 | 0.92384045   |
| 0 | 0.091003303 | 0 | 0            | 0 | 0            | 0 | 0           | 0 | 0.91337629   |
| 0 | 0.091015503 | 0 | 0            | 0 | 0            | 0 | 0           | 0 | 0.91920212   |
| 0 | 0           | 0 | 0            | 0 | -0.089407796 | 0 | 0.064903767 | 0 | 0.95091145   |
| 0 | 0           | 0 | -0.015379803 | 0 | -0.094440748 | 0 | 0           | 0 | 1.0108209    |
| 0 | 0           | 0 | 0            | 0 | -0.093679101 | 0 | 0           | 0 | 1.0131068    |
| 0 | 0.036677571 | 0 | 0            | 0 | -0.10412494  | 0 | 0.023222058 | 0 | 0.95733256   |
| 0 | 0           | 0 | 0            | 0 | -0.10526205  | 0 | 0           | 0 | 1.0117227    |
| 0 | 0           | 0 | 0            | 0 | -0.10331784  | 0 | 0           | 0 | 1.0140173    |
| 0 | 0.087624823 | 0 | 0            | 0 | -0.036707468 | 0 | 0.076581483 | 0 | 0            |
| 0 | 0           | 0 | 0            | 0 | -0.091520917 | 0 | 0           | 0 | 1.0083808    |
| 0 | 0           | 0 | 0            | 0 | -0.09828301  | 0 | 0           | 0 | 1.0101996    |
| 0 | 0           | 0 | -0.001868827 | 0 | -0.096500886 | 0 | 0           | 0 | 1.0098891    |
| 0 | 0.09766226  | 0 | -0.017893106 | 0 | 0            | 0 | 0.076593916 | 0 | 0            |
| 0 | 0           | 0 | -0.001948247 | 0 | -0.091136474 | 0 | 0           | 0 | 1.0136364    |
| 0 | 0           | 0 | 0            | 0 | -0.091908399 | 0 | 0           | 0 | 1.0139805    |
| 0 | 0           | 0 | -0.002211784 | 0 | -0.089880634 | 0 | 0           | 0 | 1.013725     |
| 0 | 0.045529463 | 0 | -0.00223288  | 0 | -0.084423422 | 0 | 0           | 0 | 0.96929461   |
| 0 | 0.046288558 | 0 | 0            | 0 | -0.085157398 | 0 | 0           | 0 | 0.96904666   |
| 0 | 0.045829136 | 0 | 0            | 0 | -0.085966838 | 0 | 0           | 0 | 0.96973154   |
| 0 | 0.10584357  | 0 | 0            | 0 | 0            | 0 | 0.074176579 | 0 | 0            |
| 0 | 0.10577184  | 0 | 0            | 0 | 0            | 0 | 0.073274355 | 0 | 0            |
| 0 | 0.10633543  | 0 | 0            | 0 | 0            | 0 | 0.074371251 | 0 | 0            |
| 0 | 0           | 0 | -0.066752347 | 0 | 0            | 0 | 0           | 0 | 0.9950671    |
| 0 | 0           | 0 | -0.002992189 | 0 | -0.11439957  | 0 | 0.036173925 | 0 | 0.9806329    |
| 0 | 0           | 0 | 0            | 0 | -0.11665017  | 0 | 0.036896656 | 0 | 0.9812224    |
| 0 | 0           | 0 | 0            | 0 | -0.11753518  | 0 | 0.035767415 | 0 | 0.98164889   |
| 0 | 0           | 0 | -0.043654275 | 0 | 0            | 0 | 0.064857716 | 0 | 0.94059498   |
| 0 | 0.076985704 | 0 | 0            | 0 | -0.04429753  | 0 | 0.077248389 | 0 | -0.063646399 |
| 0 | 0.090338814 | 0 | -0.019312341 | 0 | 0            | 0 | 0.07723699  | 0 | -0.080620674 |
| 0 | 0.099218523 | 0 | 0            | 0 | 0            | 0 | 0.074734979 | 0 | -0.085991062 |
| 0 | 0.09922052  | 0 | 0            | 0 | 0            | 0 | 0.074066706 | 0 | -0.08848819  |
| 0 | 0.099710248 | 0 | 0            | 0 | 0            | 0 | 0.07493979  | 0 | -0.08624934  |
| 0 | 0           | 0 | 0            | 0 | -0.086898768 | 0 | 0           | 0 | 1.012623     |
| 0 | 0           | 0 | -0.015074028 | 0 | -0.09001422  | 0 | 0           | 0 | 1.0107643    |
| 0 | 0           | 0 | 0            | 0 | -0.085121067 | 0 | 0           | 0 | 1.0072049    |
| 0 | 0           | 0 | 0            | 0 | -0.1008908   | 0 | 0           | 0 | 1.0113692    |



|   |             |   |              |   |              |   |             |              |
|---|-------------|---|--------------|---|--------------|---|-------------|--------------|
| 0 | 0           | 0 | -0.003814658 | 0 | -0.092537338 | 0 | 0           | 1.0095345    |
| 0 | 0           | 0 | -0.004593521 | 0 | -0.08116154  | 0 | 0           | 1.0126137    |
| 0 | 0.084371434 | 0 | 0            | 0 | -0.031712567 | 0 | 0.075464278 | 0            |
| 0 | 0.092051092 | 0 | -0.017938244 | 0 | 0            | 0 | 0.075761556 | 0            |
| 0 | 0           | 0 | -0.042502554 | 0 | 0            | 0 | 0.064261145 | 0.94106777   |
| 0 | 0.034567396 | 0 | 0            | 0 | -0.075536546 | 0 | 0.0754257   | 0            |
| 0 | 0           | 0 | -0.063844653 | 0 | 0            | 0 | 0           | 0.99540308   |
| 0 | 0.035441968 | 0 | 0            | 0 | -0.07352378  | 0 | 0.075796079 | 0            |
| 0 | 0.10019115  | 0 | 0            | 0 | 0            | 0 | 0.072224095 | 0            |
| 0 | 0.035010553 | 0 | 0            | 0 | -0.073882864 | 0 | 0.075767297 | 0            |
| 0 | 0.035231254 | 0 | -0.000800972 | 0 | -0.073031018 | 0 | 0.076042826 | 0            |
| 0 | 0.10026139  | 0 | 0            | 0 | 0            | 0 | 0.073358332 | 0            |
| 0 | 0.088522974 | 0 | -0.032319305 | 0 | 0            | 0 | 0           | 0            |
| 0 | 0           | 0 | -0.040607029 | 0 | 0            | 0 | 0           | 0.99706253   |
| 0 | 0.088631853 | 0 | 0            | 0 | -0.03082871  | 0 | 0           | 0            |
| 0 | 0.087337084 | 0 | 0            | 0 | -0.03359771  | 0 | 0           | 0            |
| 0 | 0.035098959 | 0 | -0.050942589 | 0 | 0            | 0 | 0.074734203 | 0            |
| 0 | 0.073699891 | 0 | 0            | 0 | -0.039418579 | 0 | 0.07611005  | -0.059830462 |
| 0 | 0.097312084 | 0 | -0.014467376 | 0 | 0            | 0 | 0           | 0            |
| 0 | 0           | 0 | -0.040376294 | 0 | 0            | 0 | 0           | 1.0038891    |
| 0 | 0.08940037  | 0 | 0            | 0 | -0.030697916 | 0 | 0           | 0            |
| 0 | 0.089000343 | 0 | -0.005824686 | 0 | -0.025518587 | 0 | 0           | 0            |
| 0 | 0.08477334  | 0 | -0.019365811 | 0 | 0            | 0 | 0.076346498 | -0.074568847 |
| 0 | 0.10392986  | 0 | 0            | 0 | 0            | 0 | 0           | 0            |
| 0 | 0.06499309  | 0 | -0.059796442 | 0 | 0            | 0 | 0           | 0.9553131    |
| 0 | 0.10445198  | 0 | 0            | 0 | 0            | 0 | 0           | 0            |
| 0 | 0.098336315 | 0 | -0.013836296 | 0 | 0            | 0 | 0           | 0            |
| 0 | 0.10462388  | 0 | 0            | 0 | 0            | 0 | 0           | 0            |
| 0 | 0           | 0 | -0.033739864 | 0 | -0.066995872 | 0 | 0.078206644 | 0            |
| 0 | 0           | 0 | 0            | 0 | 0            | 0 | 0.058748774 | 0.95506653   |
| 0 | 0           | 0 | 0            | 0 | 0            | 0 | 0.057905409 | 0.95153588   |
| 0 | 0.065606296 | 0 | -0.055643283 | 0 | 0            | 0 | -0.03045907 | 0.97051056   |
| 0 | 0.093688501 | 0 | 0            | 0 | 0            | 0 | 0.072962859 | -0.08287575  |
| 0 | 0           | 0 | 0            | 0 | 0            | 0 | 0.059123143 | 0.95520772   |
| 0 | 0.093684934 | 0 | 0            | 0 | 0            | 0 | 0.073852926 | -0.079914041 |
| 0 | 0.080051988 | 0 | -0.034684294 | 0 | 0            | 0 | 0           | -0.071514795 |
| 0 | 0           | 0 | 0            | 0 | -0.098265762 | 0 | 0.07680035  | 0.00998164   |
| 0 | 0           | 0 | 0            | 0 | -0.097437618 | 0 | 0.076016779 | 0            |
| 0 | 0           | 0 | 0            | 0 | -0.097728283 | 0 | 0.077204969 | 0            |
| 0 | 0           | 0 | 0            | 0 | -0.097980945 | 0 | 0.077228123 | 0            |
| 0 | 0.07571696  | 0 | 0            | 0 | -0.041888466 | 0 | 0           | -0.060218569 |
| 0 | 0.049123245 | 0 | 0            | 0 | -0.1081883   | 0 | 0.032782084 | 0            |
| 0 | 0.049678003 | 0 | 0            | 0 | -0.10689086  | 0 | 0.031838758 | 0            |
| 0 | 0.077175715 | 0 | 0            | 0 | -0.039038172 | 0 | 0           | -0.065445509 |
| 0 | 0.0474107   | 0 | 0            | 0 | -0.11093291  | 0 | 0.029506351 | 0            |
| 0 | 0.047325098 | 0 | -0.000711383 | 0 | -0.11030711  | 0 | 0.029708555 | 0            |
| 0 | 0           | 0 | 0            | 0 | -0.096362286 | 0 | 0.076369398 | 0.007694551  |

|   |             |   |              |   |              |   |             |   |              |
|---|-------------|---|--------------|---|--------------|---|-------------|---|--------------|
| 0 | 0           | 0 | -0.007251413 | 0 | -0.08896825  | 0 | 0.076890831 | 0 | 0            |
| 0 | 0           | 0 | -0.039488159 | 0 | 0            | 0 | 0           | 0 | 0.99644206   |
| 0 | 0.077830783 | 0 | 0            | 0 | -0.038918261 | 0 | 0           | 0 | -0.061993946 |
| 0 | 0           | 0 | 0            | 0 | -0.095858422 | 0 | 0.076397435 | 0 | 0            |
| 0 | 0           | 0 | -0.005559436 | 0 | -0.091375015 | 0 | 0.077822275 | 0 | 0.009204107  |
| 0 | 0           | 0 | 0            | 0 | -0.095973286 | 0 | 0.076512687 | 0 | 0            |
| 0 | 0           | 0 | 0            | 0 | -0.096678088 | 0 | 0.077354586 | 0 | 0.010268553  |
| 0 | 0.077411491 | 0 | -0.004108687 | 0 | -0.035415251 | 0 | 0           | 0 | -0.0623579   |
| 0 | 0.033889398 | 0 | 0            | 0 | -0.068862998 | 0 | 0.074508778 | 0 | 0            |
| 0 | 0           | 0 | -0.007493937 | 0 | -0.089008346 | 0 | 0.078322158 | 0 | 0            |
| 0 | 0           | 0 | -0.00710561  | 0 | -0.089576939 | 0 | 0.078331241 | 0 | 0            |
| 0 | 0           | 0 | 0            | 0 | -0.096384424 | 0 | 0.077790189 | 0 | 0            |
| 0 | 0.089437151 | 0 | -0.01594344  | 0 | 0            | 0 | 0           | 0 | -0.080943817 |
| 0 | 0.043562333 | 0 | -0.027735452 | 0 | 0            | 0 | 0.073759027 | 0 | 0            |
| 0 | 0.043520806 | 0 | -0.027924625 | 0 | 0            | 0 | 0.074046608 | 0 | 0            |
| 0 | 0.033856122 | 0 | 0            | 0 | -0.067791902 | 0 | 0.074572145 | 0 | 0            |
| 0 | 0.034137168 | 0 | -0.003526317 | 0 | -0.064332769 | 0 | 0.075233623 | 0 | 0            |
| 0 | 0.040270403 | 0 | 0            | 0 | -0.11124373  | 0 | 0.036342598 | 0 | -0.022404883 |
| 0 | 0.040163859 | 0 | 0            | 0 | -0.11110573  | 0 | 0.034706547 | 0 | -0.024814728 |
| 0 | 0.090342101 | 0 | -0.015356527 | 0 | 0            | 0 | 0           | 0 | -0.077379642 |
| 0 | 0.038438988 | 0 | 0            | 0 | -0.11415645  | 0 | 0.032902696 | 0 | -0.023130666 |
| 0 | 0.038403533 | 0 | 0.000472613  | 0 | -0.11455884  | 0 | 0.033115479 | 0 | -0.023016911 |
| 0 | 0.096788864 | 0 | 0            | 0 | 0            | 0 | 0           | 0 | -0.08517754  |
| 0 | 0.062818126 | 0 | -0.061548251 | 0 | 0            | 0 | 0           | 0 | 0.9457331    |
| 0 | 0.097315685 | 0 | 0            | 0 | 0            | 0 | 0           | 0 | -0.085631767 |
| 0 | 0.097393215 | 0 | 0            | 0 | 0            | 0 | 0           | 0 | -0.081798858 |
| 0 | 0.027232713 | 0 | 0            | 0 | -0.11542959  | 0 | 0.040995145 | 0 | 0            |
| 0 | 0           | 0 | 0            | 0 | 0            | 0 | 0.057285763 | 0 | 0.95125211   |
| 0 | 0.027447295 | 0 | 0.002169742  | 0 | -0.11727157  | 0 | 0.041145562 | 0 | 0            |
| 0 | 0.027291247 | 0 | 0            | 0 | -0.11493824  | 0 | 0.041525154 | 0 | 0            |
| 0 | 0           | 0 | -0.072502949 | 0 | 0            | 0 | 0.077639413 | 0 | 0            |
| 0 | 0           | 0 | 0            | 0 | 0            | 0 | 0.058281721 | 0 | 0.95513389   |
| 0 | 0.083661926 | 0 | -0.030874332 | 0 | 0            | 0 | 0           | 0 | 0            |
| 0 | 0.026255991 | 0 | 0.00613518   | 0 | -0.12112053  | 0 | 0.039762051 | 0 | 0            |
| 0 | 0.025081559 | 0 | 0            | 0 | -0.11750437  | 0 | 0.038557831 | 0 | 0            |
| 0 | 0.025037656 | 0 | 0.002361087  | 0 | -0.12071456  | 0 | 0.037632601 | 0 | 0            |
| 0 | 0.059407195 | 0 | 0            | 0 | -0.087233162 | 0 | 0           | 0 | 0            |
| 0 | 0.059214942 | 0 | 0            | 0 | -0.087612805 | 0 | 0           | 0 | 0            |
| 0 | 0.033748193 | 0 | -0.048831152 | 0 | 0            | 0 | 0.074103767 | 0 | 0            |
| 0 | 0.058772443 | 0 | -0.00109297  | 0 | -0.087349243 | 0 | 0           | 0 | 0            |
| 0 | 0           | 0 | -0.069935302 | 0 | 0            | 0 | 0.076064724 | 0 | 0            |
| 0 | 0           | 0 | -0.071357825 | 0 | 0            | 0 | 0.077278643 | 0 | -0.005231295 |
| 0 | 0.059297406 | 0 | -0.000574391 | 0 | -0.08664997  | 0 | 0           | 0 | 0            |
| 0 | 0.059593802 | 0 | 0            | 0 | -0.086670308 | 0 | 0           | 0 | 0            |
| 0 | 0.059115998 | 0 | -0.001282651 | 0 | -0.086335245 | 0 | 0           | 0 | 0            |
| 0 | 0.055204504 | 0 | -0.075542155 | 0 | 0            | 0 | 0           | 0 | 0.95041251   |
| 0 | 0           | 0 | -0.070385419 | 0 | 0            | 0 | 0.0767052   | 0 | 0            |

|   |             |   |              |   |              |   |              |   |              |
|---|-------------|---|--------------|---|--------------|---|--------------|---|--------------|
| 0 | 0.08552931  | 0 | 0            | 0 | -0.025914822 | 0 | 0            | 0 | 0            |
| 0 | 0.091860629 | 0 | -0.014507572 | 0 | 0            | 0 | 0            | 0 | 0            |
| 0 | 0.059581494 | 0 | -0.059771322 | 0 | 0            | 0 | 0            | 0 | 0.95966858   |
| 0 | 0           | 0 | 0            | 0 | 0            | 0 | 0            | 0 | 1.0055379    |
| 0 | 0.08443159  | 0 | 0            | 0 | -0.028204621 | 0 | 0            | 0 | 0            |
| 0 | 0.033607984 | 0 | -0.018084544 | 0 | -0.05514089  | 0 | 0            | 0 | 0            |
| 0 | 0.052216093 | 0 | 0            | 0 | 0            | 0 | 0.069870529  | 0 | 0            |
| 0 | 0.098491215 | 0 | 0            | 0 | 0            | 0 | 0            | 0 | 0            |
| 0 | 0.052566378 | 0 | 0            | 0 | 0            | 0 | 0.070506552  | 0 | 0            |
| 0 | 0.060571509 | 0 | -0.055344537 | 0 | 0            | 0 | -0.029479128 | 0 | 0.97438786   |
| 0 | 0.085989378 | 0 | -0.008253613 | 0 | -0.018181735 | 0 | 0            | 0 | 0            |
| 0 | 0           | 0 | -0.035326453 | 0 | -0.058708872 | 0 | 0.077378499  | 0 | 0            |
| 0 | 0           | 0 | 0            | 0 | 0            | 0 | 0            | 0 | 1.0056477    |
| 0 | 0           | 0 | 0            | 0 | 0            | 0 | 0            | 0 | 1.0115212    |
| 0 | 0.036344055 | 0 | 0            | 0 | -0.069771242 | 0 | 0            | 0 | 0            |
| 0 | 0.035046807 | 0 | 0            | 0 | -0.070584948 | 0 | 0            | 0 | 0            |
| 0 | 0.052804844 | 0 | 0            | 0 | 0            | 0 | 0.070673331  | 0 | 0            |
| 0 | 0.050582277 | 0 | 0            | 0 | -0.089714595 | 0 | 0            | 0 | -0.034398508 |
| 0 | 0.051302555 | 0 | 0            | 0 | -0.088443024 | 0 | 0            | 0 | -0.034866262 |
| 0 | 0.051030458 | 0 | 5.15E-05     | 0 | -0.088962008 | 0 | 0            | 0 | -0.034819457 |
| 0 | 0.050307758 | 0 | -0.001229618 | 0 | -0.088806509 | 0 | 0            | 0 | -0.034374575 |
| 0 | 0.050816573 | 0 | 0            | 0 | -0.089062526 | 0 | 0            | 0 | -0.034410304 |
| 0 | 0.051255281 | 0 | -0.000140319 | 0 | -0.088139424 | 0 | 0            | 0 | -0.034934611 |
| 0 | 0           | 0 | 0            | 0 | -0.12753777  | 0 | 0.047128004  | 0 | 0.013930711  |
| 0 | 0           | 0 | 0            | 0 | -0.12639563  | 0 | 0.04793831   | 0 | 0.01375655   |
| 0 | 0           | 0 | -0.000809289 | 0 | -0.12567616  | 0 | 0.048030666  | 0 | 0.013587401  |
| 0 | 0           | 0 | -0.003116613 | 0 | -0.12615085  | 0 | 0.044905204  | 0 | 0.012192334  |
| 0 | 0           | 0 | 0            | 0 | -0.12828852  | 0 | 0.045447922  | 0 | 0.012753788  |
| 0 | 0           | 0 | -0.000705887 | 0 | -0.12672284  | 0 | 0.046289485  | 0 | 0.012596884  |
| 0 | 0.035845006 | 0 | 0            | 0 | -0.068441235 | 0 | 0            | 0 | 0            |
| 0 | 0.035861188 | 0 | 0.001814431  | 0 | -0.070351182 | 0 | 0            | 0 | 0            |
| 0 | 0.037425579 | 0 | 0.002115685  | 0 | -0.069646276 | 0 | 0            | 0 | 0            |
| 0 | 0           | 0 | -0.005228019 | 0 | -0.12479698  | 0 | 0.044519715  | 0 | 0            |
| 0 | 0           | 0 | 0            | 0 | -0.12791163  | 0 | 0.046601508  | 0 | 0            |
| 0 | 0           | 0 | -0.002307746 | 0 | -0.12488455  | 0 | 0.047326397  | 0 | 0            |
| 0 | 0           | 0 | 0            | 0 | -0.12837207  | 0 | 0.045538749  | 0 | 0            |
| 0 | 0           | 0 | 0            | 0 | -0.12692985  | 0 | 0.047286588  | 0 | 0            |
| 0 | 0           | 0 | -0.002226371 | 0 | -0.12549898  | 0 | 0.046297906  | 0 | 0            |
| 0 | 0           | 0 | -0.007207039 | 0 | -0.12312713  | 0 | 0.044806476  | 0 | 0            |
| 0 | 0           | 0 | -0.006605825 | 0 | -0.12389804  | 0 | 0.044079182  | 0 | 0            |
| 0 | 0           | 0 | -0.003426307 | 0 | -0.12425815  | 0 | 0.046592987  | 0 | 0            |
| 0 | 0           | 0 | 0            | 0 | -0.12820124  | 0 | 0.045910481  | 0 | 0            |
| 0 | 0.075236387 | 0 | -0.033279539 | 0 | 0            | 0 | 0            | 0 | -0.065895275 |
| 0 | 0           | 0 | 0            | 0 | -0.090514471 | 0 | 0.07489823   | 0 | 0            |
| 0 | 0           | 0 | 0            | 0 | -0.091377373 | 0 | 0.075874537  | 0 | 0.010647919  |
| 0 | 0.092600599 | 0 | 0            | 0 | 0            | 0 | -0.040350128 | 0 | 0.96753162   |
| 0 | 0.029902105 | 0 | -0.00237128  | 0 | -0.094130928 | 0 | 0            | 0 | 0            |

|   |             |   |              |   |              |   |              |              |
|---|-------------|---|--------------|---|--------------|---|--------------|--------------|
| 0 | 0.030862944 | 0 | 0            | 0 | -0.094617198 | 0 | 0            | 0            |
| 0 | 0.041335591 | 0 | -0.027501866 | 0 | 0            | 0 | 0.073253435  | 0            |
| 0 | 0.030220638 | 0 | -0.003065094 | 0 | -0.092747737 | 0 | 0            | 0            |
| 0 | 0           | 0 | 0            | 0 | -0.091076446 | 0 | 0.076308779  | 0            |
| 0 | 0           | 0 | -0.009641775 | 0 | -0.080178771 | 0 | 0.075888991  | 0            |
| 0 | 0.032109264 | 0 | 0.002872151  | 0 | -0.092818494 | 0 | 0            | 0            |
| 0 | 0           | 0 | 0            | 0 | -0.089802827 | 0 | 0.075218109  | 0.0078576    |
| 0 | 0           | 0 | -0.007982621 | 0 | -0.082532781 | 0 | 0.077009036  | 0.009350987  |
| 0 | 0           | 0 | 0            | 0 | -0.08941188  | 0 | 0.075364432  | 0            |
| 0 | 0.074071176 | 0 | 0            | 0 | -0.034209107 | 0 | 0            | -0.062286148 |
| 0 | 0.03708749  | 0 | -0.04630609  | 0 | 0            | 0 | 0            | 0            |
| 0 | 0.072797595 | 0 | 0            | 0 | -0.036604066 | 0 | 0            | -0.05675936  |
| 0 | 0           | 0 | -0.009531568 | 0 | -0.080729784 | 0 | 0.077523994  | 0            |
| 0 | 0.03640418  | 0 | -0.046557474 | 0 | 0            | 0 | 0            | 0            |
| 0 | 0.058624448 | 0 | -0.059815995 | 0 | 0            | 0 | 0            | 0.95005965   |
| 0 | 0.094141805 | 0 | 0            | 0 | 0            | 0 | 0            | 0.94456375   |
| 0 | 0.08405073  | 0 | -0.01599111  | 0 | 0            | 0 | 0            | -0.075494865 |
| 0 | 0.074391913 | 0 | -0.006513634 | 0 | -0.028196185 | 0 | 0            | -0.059308718 |
| 0 | 0           | 0 | -0.069533935 | 0 | 0            | 0 | 0.076912655  | 0            |
| 0 | 0           | 0 | 0            | 0 | 0            | 0 | 0            | 1.0046659    |
| 0 | 0           | 0 | -0.067074837 | 0 | 0            | 0 | 0.075182697  | 0            |
| 0 | 0.046085309 | 0 | 0            | 0 | -0.10218913  | 0 | 0.030728276  | 0            |
| 0 | 0           | 0 | -0.082672402 | 0 | 0            | 0 | 0            | 1.0122874    |
| 0 | 0           | 0 | -0.068400942 | 0 | 0            | 0 | 0.076537207  | -0.003935645 |
| 0 | 0.0444138   | 0 | 0            | 0 | -0.10520653  | 0 | 0.030433805  | 0            |
| 0 | 0.091417092 | 0 | 0            | 0 | 0            | 0 | 0            | -0.079723439 |
| 0 | 0.042809699 | 0 | -0.003242879 | 0 | -0.10473616  | 0 | 0.027818445  | 0            |
| 0 | 0           | 0 | -0.067309436 | 0 | 0            | 0 | -0.008083993 | 1.0189295    |
| 0 | 0           | 0 | -0.029825424 | 0 | -0.065532124 | 0 | 0            | 0            |
| 0 | 0           | 0 | -0.070485436 | 0 | 0            | 0 | 0            | 1.0127387    |
| 0 | 0           | 0 | -0.079704968 | 0 | 0            | 0 | -0.023646206 | 1.0237018    |
| 0 | 0.036582942 | 0 | 0            | 0 | -0.10644941  | 0 | 0.033594033  | -0.020640862 |
| 0 | 0.035585959 | 0 | 0            | 0 | -0.10828804  | 0 | 0.034010311  | -0.017502538 |
| 0 | 0           | 0 | -0.02909713  | 0 | -0.066930993 | 0 | 0            | 0.006590017  |
| 0 | 0           | 0 | -0.031612363 | 0 | -0.064180421 | 0 | 0            | 0            |
| 0 | 0           | 0 | -0.032119226 | 0 | -0.063803578 | 0 | 0            | 0            |
| 0 | 0.033909354 | 0 | -0.00202033  | 0 | -0.10905339  | 0 | 0.031238388  | -0.018416124 |
| 0 | 0.050278698 | 0 | 0            | 0 | 0            | 0 | 0.069733873  | 0            |
| 0 | 0.025821459 | 0 | 0            | 0 | -0.10977445  | 0 | 0.039181763  | 0            |
| 0 | 0.025309807 | 0 | -0.000626628 | 0 | -0.11111354  | 0 | 0.037862136  | 0            |
| 0 | 0           | 0 | -0.069586923 | 0 | 0            | 0 | -0.01722343  | 1.0203024    |
| 0 | 0.024988256 | 0 | 0.0049028    | 0 | -0.11475238  | 0 | 0.037792461  | 0            |
| 0 | 0           | 0 | 0            | 0 | -0.093254461 | 0 | 0            | 0.008658946  |
| 0 | 0.091647804 | 0 | 0            | 0 | 0            | 0 | -0.051674236 | 0.99308751   |
| 0 | 0.055171412 | 0 | -0.001428998 | 0 | -0.082408171 | 0 | 0            | 0            |
| 0 | 0.055365049 | 0 | 0            | 0 | -0.083381731 | 0 | 0            | 0            |
| 0 | 0           | 0 | 0            | 0 | -0.092649317 | 0 | 0            | 0            |

|   |             |   |              |   |              |              |   |              |
|---|-------------|---|--------------|---|--------------|--------------|---|--------------|
| 0 | 0.053724202 | 0 | -0.003650451 | 0 | -0.082904109 | 0            | 0 | 0            |
| 0 | 0           | 0 | -0.045196766 | 0 | 0            | 0.075196859  | 0 | 0            |
| 0 | 0           | 0 | 0            | 0 | -0.092822918 | 0            | 0 | 0            |
| 0 | 0           | 0 | -0.014415713 | 0 | -0.097299378 | 0            | 0 | 0.009042029  |
| 0 | 0           | 0 | -0.015524231 | 0 | -0.095218861 | 0            | 0 | 0.010183017  |
| 0 | 0.032685051 | 0 | -0.020064934 | 0 | -0.046993837 | 0            | 0 | 0            |
| 0 | 0           | 0 | 0            | 0 | -0.093699784 | 0            | 0 | 0.012399263  |
| 0 | 0           | 0 | -0.016169576 | 0 | -0.097122804 | 0            | 0 | 0            |
| 0 | 0           | 0 | -0.044437417 | 0 | 0            | 0.075066616  | 0 | -0.003104521 |
| 0 | 0           | 0 | -0.044020906 | 0 | 0            | 0.074840168  | 0 | 0            |
| 0 | 0           | 0 | -0.016085203 | 0 | -0.096908312 | 0            | 0 | 0            |
| 0 | 0           | 0 | -0.017608879 | 0 | -0.094081615 | 0            | 0 | 0            |
| 0 | 0           | 0 | 0            | 0 | -0.10631428  | 0            | 0 | 0.011119778  |
| 0 | 0           | 0 | -0.045105513 | 0 | 0            | 0.076808007  | 0 | 0            |
| 0 | 0.034033929 | 0 | 0            | 0 | -0.064237196 | 0            | 0 | 0            |
| 0 | 0           | 0 | 0            | 0 | -0.09336237  | 0            | 0 | 0            |
| 0 | 0           | 0 | -0.044337125 | 0 | 0            | 0.076381891  | 0 | 0.000311202  |
| 0 | 0           | 0 | -0.085223416 | 0 | 0            | 0            | 0 | 1.0023107    |
| 0 | 0           | 0 | 0            | 0 | -0.10694299  | 0            | 0 | 0            |
| 0 | 0           | 0 | 0            | 0 | -0.091489751 | 0            | 0 | 0.008587418  |
| 0 | 0           | 0 | -0.003076984 | 0 | -0.088609159 | 0            | 0 | 0.007944556  |
| 0 | 0.044344975 | 0 | -0.024064966 | 0 | 0            | 0            | 0 | 0            |
| 0 | 0           | 0 | -0.004623413 | 0 | -0.086557    | 0            | 0 | 0            |
| 0 | 0           | 0 | -0.001942629 | 0 | -0.097551028 | 0            | 0 | 0.009626178  |
| 0 | 0           | 0 | 0            | 0 | -0.091062684 | 0            | 0 | 0            |
| 0 | 0           | 0 | -0.004800184 | 0 | -0.086497477 | 0            | 0 | 0            |
| 0 | 0.03447229  | 0 | -0.000821675 | 0 | -0.06204148  | 0            | 0 | 0            |
| 0 | 0           | 0 | -0.003485092 | 0 | -0.097141392 | 0            | 0 | 0            |
| 0 | 0.087707059 | 0 | 0            | 0 | 0            | -0.038812682 | 0 | 0.97057454   |
| 0 | 0           | 0 | -0.002363639 | 0 | -0.089731829 | 0            | 0 | 0.012295313  |
| 0 | 0.046204421 | 0 | -0.002067743 | 0 | -0.084639703 | 0            | 0 | -0.029872728 |
| 0 | 0.045919856 | 0 | -0.00245523  | 0 | -0.084782172 | 0            | 0 | -0.02968364  |
| 0 | 0.046614288 | 0 | 0            | 0 | -0.08583061  | 0            | 0 | -0.029999541 |
| 0 | 0           | 0 | -0.003053274 | 0 | -0.11923132  | 0.044522454  | 0 | 0.013829788  |
| 0 | 0           | 0 | 0            | 0 | -0.1218039   | 0.044692212  | 0 | 0.014372244  |
| 0 | 0           | 0 | -0.003530081 | 0 | -0.11993207  | 0.04286207   | 0 | 0.01290656   |
| 0 | 0           | 0 | -0.00401513  | 0 | -0.08777671  | 0            | 0 | 0            |
| 0 | 0           | 0 | -0.079774332 | 0 | 0            | 0            | 0 | 1.0120051    |
| 0 | 0           | 0 | -0.005647051 | 0 | -0.11856259  | 0.042483645  | 0 | 0            |
| 0 | 0           | 0 | -0.004562382 | 0 | -0.11842874  | 0.043824005  | 0 | 0            |
| 0 | 0           | 0 | 0            | 0 | -0.12216924  | 0.044171005  | 0 | 0            |
| 0 | 0.034747722 | 0 | -0.044483663 | 0 | 0            | 0            | 0 | 0            |
| 0 | 0           | 0 | -0.067902142 | 0 | 0            | 0            | 0 | 0            |
| 0 | 0           | 0 | -0.007471415 | 0 | -0.11721136  | 0.042311745  | 0 | 0            |
| 0 | 0.08902917  | 0 | 0            | 0 | 0            | 0            | 0 | 0.9483375    |
| 0 | 0           | 0 | -0.066285894 | 0 | 0            | -0.008686359 | 0 | 1.0190344    |
| 0 | 0.092394633 | 0 | 0            | 0 | 0            | 0            | 0 | 0.93380446   |

|   |             |   |              |   |              |              |   |              |
|---|-------------|---|--------------|---|--------------|--------------|---|--------------|
| 0 | 0           | 0 | -0.065872471 | 0 | 0            | 0            | 0 | 0            |
| 0 | 0           | 0 | -0.066771369 | 0 | 0            | 0            | 0 | -0.00560636  |
| 0 | 0.052166449 | 0 | 0            | 0 | 0            | 0            | 0 | 0            |
| 0 | 0           | 0 | -0.076955551 | 0 | 0            | -0.022537349 | 0 | 1.0231498    |
| 0 | 0           | 0 | -0.068386608 | 0 | 0            | 0            | 0 | 0            |
| 0 | 0.028569738 | 0 | -0.003406966 | 0 | -0.088758036 | 0            | 0 | 0            |
| 0 | 0           | 0 | -0.067165921 | 0 | 0            | 0            | 0 | -0.00193805  |
| 0 | 0           | 0 | -0.044061956 | 0 | 0            | 0.0745013    | 0 | 0            |
| 0 | 0           | 0 | -0.031167164 | 0 | -0.057635092 | 0            | 0 | 0            |
| 0 | 0.089546503 | 0 | 0            | 0 | 0            | -0.073994653 | 0 | 1.0026672    |
| 0 | 0           | 0 | -0.043306708 | 0 | 0            | 0.074342488  | 0 | -0.002581999 |
| 0 | 0           | 0 | -0.030540879 | 0 | -0.058906911 | 0            | 0 | 0.006916674  |
| 0 | 0           | 0 | -0.033562112 | 0 | -0.055771852 | 0            | 0 | 0            |
| 0 | 0           | 0 | 0            | 0 | -0.086511259 | 0            | 0 | 0.008809905  |
| 0 | 0.086321064 | 0 | 0            | 0 | 0            | -0.051854815 | 0 | 0.99742308   |
| 0 | 0           | 0 | 0            | 0 | -0.086080322 | 0            | 0 | 0            |
| 0 | 0           | 0 | -0.013928304 | 0 | -0.093227642 | 0            | 0 | 0.009714414  |
| 0 | 0           | 0 | -0.005469498 | 0 | -0.079942672 | 0            | 0 | 0.007623838  |
| 0 | 0           | 0 | -0.015607858 | 0 | -0.092816443 | 0            | 0 | 0            |
| 0 | 0           | 0 | -0.007189903 | 0 | -0.077840905 | 0            | 0 | 0            |
| 0 | 0           | 0 | -0.064979257 | 0 | 0            | 0            | 0 | 0            |
| 0 | 0           | 0 | -0.063857863 | 0 | 0            | 0            | 0 | -0.004764563 |
| 0 | 0.075692706 | 0 | -0.054264265 | 0 | 0            | -0.014400835 | 0 | 0            |
| 0 | 0           | 0 | 0            | 0 | 0            | 0.068998727  | 0 | 0            |
| 0 | 0           | 0 | 0            | 0 | 0            | 0.069100748  | 0 | 0.004270914  |
| 0 | 0           | 0 | 0            | 0 | 0            | 0.069230787  | 0 | 0            |
| 0 | 0.075123416 | 0 | -0.055862485 | 0 | 0            | 0            | 0 | 0            |
| 0 | 0.072763864 | 0 | -0.060416576 | 0 | 0            | 0            | 0 | 0            |
| 0 | 0           | 0 | 0            | 0 | 0            | 0.070178447  | 0 | 0.007401351  |
| 0 | 0           | 0 | 0            | 0 | 0            | 0.069351698  | 0 | 0.004275127  |
| 0 | 0           | 0 | 0            | 0 | 0            | 0.069471029  | 0 | 0            |
| 0 | 0           | 0 | 0            | 0 | 0            | 0.070595025  | 0 | 0            |
| 0 | 0           | 0 | -0.041531466 | 0 | 0            | 0            | 0 | 0            |
| 0 | 0           | 0 | -0.040717035 | 0 | 0            | 0            | 0 | -0.001441651 |
| 0 | 0.075398475 | 0 | -0.052828416 | 0 | 0            | -0.024634376 | 0 | 0            |
| 0 | 0.072529147 | 0 | -0.058186311 | 0 | 0            | -0.027015812 | 0 | 0            |
| 0 | 0.067734675 | 0 | -0.05522753  | 0 | 0            | -0.012394916 | 0 | -0.053194166 |
| 0 | 0.066658666 | 0 | -0.057851431 | 0 | 0            | 0            | 0 | -0.051398566 |
| 0 | 0.065269718 | 0 | -0.060521651 | 0 | 0            | 0            | 0 | -0.050290331 |
| 0 | 0.090936033 | 0 | 0            | 0 | 0            | 0            | 0 | 0.96675109   |
| 0 | 0.07164622  | 0 | -0.059968305 | 0 | 0            | 0            | 0 | 0            |
| 0 | 0           | 0 | 0            | 0 | 0            | 0.068500458  | 0 | 0.004610591  |
| 0 | 0           | 0 | 0            | 0 | 0            | 0.068636966  | 0 | 0            |
| 0 | 0.06660268  | 0 | -0.055228467 | 0 | 0            | -0.023756477 | 0 | -0.058943656 |
| 0 | 0.064359596 | 0 | -0.05936795  | 0 | 0            | -0.025583515 | 0 | -0.057535391 |
| 0 | 0.07026351  | 0 | -0.054244801 | 0 | 0            | -0.014431187 | 0 | 0            |
| 0 | 0.070482249 | 0 | -0.054348106 | 0 | 0            | 0            | 0 | 0            |

|   |             |   |              |   |             |   |              |   |              |
|---|-------------|---|--------------|---|-------------|---|--------------|---|--------------|
| 0 | 0.036840107 | 0 | -0.062944545 | 0 | 0           | 0 | -0.008328719 | 0 | 0            |
| 0 | 0.06314401  | 0 | -0.062073968 | 0 | 0           | 0 | 0            | 0 | -0.056983855 |
| 0 | 0.038450363 | 0 | -0.057963769 | 0 | 0           | 0 | -0.006522044 | 0 | 0            |
| 0 | 0.03677408  | 0 | -0.064715986 | 0 | 0           | 0 | 0            | 0 | 0            |
| 0 | 0.1019401   | 0 | 0            | 0 | 0           | 0 | -0.024619288 | 0 | 0            |
| 0 | 0.070927358 | 0 | -0.051450157 | 0 | 0           | 0 | -0.023148053 | 0 | 0            |
| 0 | 0.062375377 | 0 | -0.055197439 | 0 | 0           | 0 | -0.012436897 | 0 | -0.04793472  |
| 0 | 0           | 0 | 0            | 0 | 0           | 0 | 0            | 0 | 0.00526157   |
| 0 | 0           | 0 | 0            | 0 | 0           | 0 | 0            | 0 | 0            |
| 0 | 0.062061442 | 0 | -0.056374343 | 0 | 0           | 0 | 0            | 0 | -0.046765907 |
| 0 | 0.10220808  | 0 | 0            | 0 | 0           | 0 | 0            | 0 | 0            |
| 0 | 0.10091128  | 0 | 0            | 0 | 0           | 0 | -0.035772212 | 0 | 0            |
| 0 | 0           | 0 | 0            | 0 | 0           | 0 | -0.030835964 | 0 | 1.05991      |
| 0 | 0.031247012 | 0 | -0.064304868 | 0 | 0           | 0 | -0.021753953 | 0 | 0            |
| 0 | 0.062194251 | 0 | -0.053881779 | 0 | 0           | 0 | -0.02230337  | 0 | -0.053894602 |
| 0 | 0.094404419 | 0 | 0            | 0 | 0           | 0 | -0.023473429 | 0 | -0.068001227 |
| 0 | 0           | 0 | 0            | 0 | 0           | 0 | -0.040097491 | 0 | 1.0605666    |
| 0 | 0.035063515 | 0 | -0.060976857 | 0 | 0           | 0 | -0.008246744 | 0 | 0            |
| 0 | 0.094793227 | 0 | 0            | 0 | 0           | 0 | 0            | 0 | -0.065761422 |
| 0 | 0           | 0 | 0            | 0 | 0           | 0 | 0            | 0 | 1.0383933    |
| 0 | 0.09678674  | 0 | 0            | 0 | 0           | 0 | -0.02402157  | 0 | 0            |
| 0 | 0           | 0 | 0            | 0 | 0           | 0 | -0.030244862 | 0 | 1.0584688    |
| 0 | 0           | 0 | -0.081921371 | 0 | 0           | 0 | -0.007551943 | 0 | 0.004890811  |
| 0 | 0           | 0 | -0.083213454 | 0 | 0           | 0 | -0.008110479 | 0 | 0            |
| 0 | 0           | 0 | -0.082726276 | 0 | 0           | 0 | -0.00783218  | 0 | 0            |
| 0 | 0           | 0 | -0.083398435 | 0 | 0           | 0 | 0            | 0 | 0.005395827  |
| 0 | 0           | 0 | -0.084790243 | 0 | 0           | 0 | 0            | 0 | 0            |
| 0 | 0.093288539 | 0 | 0            | 0 | 0           | 0 | -0.035302914 | 0 | -0.073853844 |
| 0 | 0           | 0 | -0.070407261 | 0 | 0           | 0 | -0.002157547 | 0 | 0.005738174  |
| 0 | 0           | 0 | -0.071489166 | 0 | 0           | 0 | -0.0026019   | 0 | 0            |
| 0 | 0.10005402  | 0 | 0            | 0 | 0           | 0 | -0.049314483 | 0 | 0            |
| 0 | 0           | 0 | 0            | 0 | 0           | 0 | -0.051034169 | 0 | 1.0830445    |
| 0 | 0           | 0 | -0.083012859 | 0 | 0           | 0 | -0.01772833  | 0 | 0            |
| 0 | 0           | 0 | -0.08171438  | 0 | 0           | 0 | -0.017962193 | 0 | -0.001295838 |
| 0 | 0.089327386 | 0 | 0            | 0 | 0           | 0 | -0.022912438 | 0 | -0.063112481 |
| 0 | 0.068878618 | 0 | 0            | 0 | 0.039987363 | 0 | 0.036547973  | 0 | 0.87927243   |
| 0 | 0           | 0 | -0.079079953 | 0 | 0           | 0 | -0.007341381 | 0 | 0.005522569  |
| 0 | 0           | 0 | -0.080360707 | 0 | 0           | 0 | -0.007884711 | 0 | 0            |
| 0 | 0.09230349  | 0 | 0            | 0 | 0           | 0 | -0.047848364 | 0 | -0.062196549 |
| 0 | 0.058330399 | 0 | 0            | 0 | 0           | 0 | -0.02051913  | 0 | 0            |
| 0 | 0.069113776 | 0 | 0            | 0 | 0.040045119 | 0 | 0            | 0 | 0.90735329   |
| 0 | 0.0698634   | 0 | -0.018304221 | 0 | 0.057112237 | 0 | 0            | 0 | 0.91062473   |
| 0 | 0.044468773 | 0 | 0            | 0 | 0           | 0 | 0.034601763  | 0 | 0.89755185   |
| 0 | 0.068655749 | 0 | 0            | 0 | 0.039239449 | 0 | 0            | 0 | 0.9153353    |
| 0 | 0.044411691 | 0 | 0            | 0 | 0           | 0 | 0.036074269  | 0 | 0.90254725   |
| 0 | 0.045050578 | 0 | 0.000756194  | 0 | 0           | 0 | 0.036343555  | 0 | 0.90224986   |
| 0 | 0.044622252 | 0 | 0            | 0 | 0           | 0 | 0            | 0 | 0.93049381   |

|   |             |   |              |   |              |              |   |              |
|---|-------------|---|--------------|---|--------------|--------------|---|--------------|
| 0 | 0.045699485 | 0 | 0.001591918  | 0 | 0            | 0            | 0 | 0.93003004   |
| 0 | 0.043197174 | 0 | -0.002850244 | 0 | 0            | 0            | 0 | 0.93863283   |
| 0 | 0           | 0 | -0.023592949 | 0 | 0            | 0.037587547  | 0 | 0.94145065   |
| 0 | 0           | 0 | -0.014354859 | 0 | 0            | 0.036302216  | 0 | 0.93985062   |
| 0 | 0           | 0 | -0.018640872 | 0 | 0.008972826  | 0.038595373  | 0 | 0.94424172   |
| 0 | 0           | 0 | 0            | 0 | -0.007942576 | 0.035308645  | 0 | 0.94443439   |
| 0 | 0           | 0 | 0            | 0 | 0            | 0.035124944  | 0 | 0.94498313   |
| 0 | 0           | 0 | -0.022605016 | 0 | 0            | 0            | 0 | 0.97155506   |
| 0 | 0           | 0 | -0.041115432 | 0 | 0.027916985  | 0            | 0 | 0.97526623   |
| 0 | 0           | 0 | 0            | 0 | -0.008491916 | 0.036725281  | 0 | 0.94942221   |
| 0 | 0           | 0 | -0.017322976 | 0 | 0.007648861  | 0            | 0 | 0.97455612   |
| 0 | 0           | 0 | 0            | 0 | -0.008592794 | 0            | 0 | 0.97810271   |
| 0 | 0.081093145 | 0 | -0.022547144 | 0 | 0.068747307  | 0.049109464  | 0 | 0            |
| 0 | 0.080256785 | 0 | 0            | 0 | 0.047673447  | 0.045349179  | 0 | 0            |
| 0 | 0.080017802 | 0 | 0            | 0 | 0.04710072   | 0.047282468  | 0 | 0            |
| 0 | 0           | 0 | 0            | 0 | 0            | -0.024749352 | 0 | 0.019724445  |
| 0 | 0           | 0 | 0            | 0 | 0            | -0.025514561 | 0 | 0            |
| 0 | 0.070441897 | 0 | -0.020931597 | 0 | 0.059279735  | 0.049701523  | 0 | -0.054487509 |
| 0 | 0.079641982 | 0 | -0.042001899 | 0 | 0.083890166  | 0            | 0 | 0            |
| 0 | 0.081898251 | 0 | -0.020883877 | 0 | 0.067564625  | 0            | 0 | 0            |
| 0 | 0.069645194 | 0 | 0            | 0 | 0.039687598  | 0.04624629   | 0 | -0.054297482 |
| 0 | 0.069277368 | 0 | 0            | 0 | 0.039033344  | 0.047878624  | 0 | -0.049309483 |
| 0 | 0.051410441 | 0 | 0            | 0 | 0            | 0.045323018  | 0 | 0            |
| 0 | 0.052472058 | 0 | 0.001646169  | 0 | 0            | 0.045415804  | 0 | 0            |
| 0 | 0.080858816 | 0 | 0            | 0 | 0.047486502  | 0            | 0 | 0            |
| 0 | 0.050500059 | 0 | -0.001970999 | 0 | 0            | 0.047403651  | 0 | 0            |
| 0 | 0.031900484 | 0 | -0.034622779 | 0 | 0.042315949  | 0.0486753    | 0 | 0            |
| 0 | 0.04540471  | 0 | 0            | 0 | 0            | 0.045875539  | 0 | -0.029559133 |
| 0 | 0.045534619 | 0 | -0.000113271 | 0 | 0            | 0.046110968  | 0 | -0.029723171 |
| 0 | 0.068502227 | 0 | -0.039691629 | 0 | 0.073435163  | 0            | 0 | -0.055331648 |
| 0 | 0.033413111 | 0 | -0.015464639 | 0 | 0.026918895  | 0.047420208  | 0 | 0            |
| 0 | 0.070769942 | 0 | -0.019099566 | 0 | 0.057538511  | 0            | 0 | -0.058893386 |
| 0 | 0.042865221 | 0 | -0.0047627   | 0 | 0            | 0.047791038  | 0 | -0.023460851 |
| 0 | 0.035014651 | 0 | 0            | 0 | 0.013713836  | 0.046060977  | 0 | 0            |
| 0 | 0.027024703 | 0 | -0.010147543 | 0 | 0            | 0.046369616  | 0 | 0            |
| 0 | 0.069644365 | 0 | 0            | 0 | 0.039016228  | 0            | 0 | -0.053902445 |
| 0 | 0.052183744 | 0 | -5.69E-05    | 0 | 0            | 0            | 0 | 0            |
| 0 | 0           | 0 | -0.045242854 | 0 | 0.031519059  | 0.048729512  | 0 | 0            |
| 0 | 0.031076308 | 0 | -0.031411498 | 0 | 0.038393799  | 0            | 0 | 0            |
| 0 | 0.044234164 | 0 | -0.003011082 | 0 | 0            | 0            | 0 | -0.028581588 |
| 0 | 0           | 0 | -0.044463328 | 0 | 0.030301992  | 0.050314623  | 0 | 0.007978319  |
| 0 | 0           | 0 | -0.047292809 | 0 | 0.033331107  | 0.050768217  | 0 | 0            |
| 0 | 0           | 0 | -0.024420938 | 0 | 0            | 0.047493574  | 0 | 0.008445615  |
| 0 | 0           | 0 | -0.025230717 | 0 | 0            | 0.047615749  | 0 | 0            |
| 0 | 0           | 0 | -0.019803194 | 0 | 0.009217257  | 0.048336837  | 0 | 0.008375164  |
| 0 | 0           | 0 | -0.021412275 | 0 | 0.011223501  | 0.048557365  | 0 | 0            |
| 0 | 0           | 0 | 0            | 0 | -0.009294318 | 0.046571962  | 0 | 0.012467087  |



|   |              |   |              |   |              |   |              |   |              |
|---|--------------|---|--------------|---|--------------|---|--------------|---|--------------|
| 0 | 0            | 0 | 0            | 0 | -0.008765212 | 0 | 0.046723519  | 0 | 0            |
| 0 | 0            | 0 | -0.041247545 | 0 | 0.027106437  | 0 | 0            | 0 | 0.004664747  |
| 0 | 0            | 0 | -0.044113959 | 0 | 0.030229192  | 0 | 0            | 0 | 0            |
| 0 | 0            | 0 | 0.01252015   | 0 | -0.064450603 | 0 | -0.03321535  | 0 | 1.0227697    |
| 0 | 0            | 0 | 0            | 0 | -0.054348269 | 0 | -0.033195216 | 0 | 1.023286     |
| 0 | 0.008843401  | 0 | 0            | 0 | -0.051311447 | 0 | -0.039340731 | 0 | 1.0166584    |
| 0 | 0            | 0 | 0.020155442  | 0 | -0.079542342 | 0 | 0            | 0 | 0.99854955   |
| 0 | 0            | 0 | -0.009745385 | 0 | -0.053790038 | 0 | -0.044437865 | 0 | 1.0327116    |
| 0 | 0.001208767  | 0 | 0            | 0 | -0.061698886 | 0 | -0.044858342 | 0 | 1.0339985    |
| 0 | -0.002149486 | 0 | -0.009691216 | 0 | -0.057817818 | 0 | -0.05021789  | 0 | 1.0343077    |
| 0 | -0.002087442 | 0 | 0            | 0 | -0.067379076 | 0 | 0            | 0 | 0.99697835   |
| 0 | -0.000300413 | 0 | 0.024793769  | 0 | -0.087169325 | 0 | 0            | 0 | 0.99361536   |
| 0 | 0.038817431  | 0 | 0            | 0 | 0            | 0 | -0.061157147 | 0 | 1.0196135    |
| 0 | 0.027714721  | 0 | -0.019112112 | 0 | 0            | 0 | -0.065883734 | 0 | 1.0224594    |
| 0 | 0            | 0 | -0.031825311 | 0 | 0            | 0 | -0.054590447 | 0 | 1.0439151    |
| 0 | 0.016919133  | 0 | -0.037083376 | 0 | 0            | 0 | -0.0656784   | 0 | 1.0363053    |
| 0 | -0.01879982  | 0 | -0.009924286 | 0 | -0.08185286  | 0 | 0            | 0 | 1.0131436    |
| 0 | 0.018331233  | 0 | -0.02985902  | 0 | 0            | 0 | 0            | 0 | 0.98496515   |
| 0 | 0            | 0 | 0.012979845  | 0 | -0.067886522 | 0 | -0.022530472 | 0 | 0.029364229  |
| 0 | 0.009978853  | 0 | 0.01705795   | 0 | -0.067176273 | 0 | -0.027981283 | 0 | 0.018588031  |
| 0 | 0.008136826  | 0 | 0            | 0 | -0.054449493 | 0 | -0.027673914 | 0 | 0.020184153  |
| 0 | 0.02289536   | 0 | 0.01594779   | 0 | -0.058658647 | 0 | -0.029799229 | 0 | 0            |
| 0 | 0.019712303  | 0 | 0.01728968   | 0 | -0.062440851 | 0 | -0.031379611 | 0 | 0            |
| 0 | 0.017708541  | 0 | 0            | 0 | -0.049757877 | 0 | -0.031369116 | 0 | 0            |
| 0 | 0            | 0 | 0.011189014  | 0 | -0.066785975 | 0 | -0.023613591 | 0 | 0            |
| 0 | 0.003719472  | 0 | 0.020737416  | 0 | -0.079686393 | 0 | 0            | 0 | 0.029463751  |
| 0 | 0.01215455   | 0 | 0.02184556   | 0 | -0.077517104 | 0 | 0            | 0 | 0            |
| 0 | -0.00182968  | 0 | -0.0098994   | 0 | -0.059335721 | 0 | -0.036634905 | 0 | 0.029729771  |
| 0 | 0.00703058   | 0 | -0.011334071 | 0 | -0.054519177 | 0 | -0.041067163 | 0 | 0            |
| 0 | 0.036613703  | 0 | -0.01793054  | 0 | 0            | 0 | -0.053583433 | 0 | 0            |
| 0 | 0.028102498  | 0 | -0.020890192 | 0 | 0            | 0 | -0.051645041 | 0 | -0.000337792 |
| 0 | 0.076154365  | 0 | 0            | 0 | -0.044046259 | 0 | 0.065684353  | 0 | 0.87268531   |
| 0 | 0.089661167  | 0 | -0.018721085 | 0 | 0            | 0 | 0.065640245  | 0 | 0.85433906   |
| 0 | 0.098259561  | 0 | 0            | 0 | 0            | 0 | 0.063167438  | 0 | 0.85136927   |
| 0 | 0.098269018  | 0 | 0            | 0 | 0            | 0 | 0.062535575  | 0 | 0.84858298   |
| 0 | 0.098748093  | 0 | 0            | 0 | 0            | 0 | 0.063381433  | 0 | 0.85092949   |
| 0 | 0.079536754  | 0 | -0.03437516  | 0 | 0            | 0 | 0            | 0 | 0.92274908   |
| 0 | 0.074810607  | 0 | 0            | 0 | -0.042344561 | 0 | 0            | 0 | 0.93674501   |
| 0 | 0.072861321  | 0 | 0            | 0 | -0.039178757 | 0 | 0.064551418  | 0 | 0.87647456   |
| 0 | 0.07625351   | 0 | 0            | 0 | -0.039569306 | 0 | 0            | 0 | 0.93044895   |
| 0 | 0.076870616  | 0 | 0            | 0 | -0.039442948 | 0 | 0            | 0 | 0.93511823   |
| 0 | 0.084089697  | 0 | -0.018781472 | 0 | 0            | 0 | 0.064756992  | 0 | 0.86026403   |
| 0 | 0.076469422  | 0 | -0.003784207 | 0 | -0.036232656 | 0 | 0            | 0 | 0.93506365   |
| 0 | 0.088821767  | 0 | -0.015869812 | 0 | 0            | 0 | 0            | 0 | 0.91331113   |
| 0 | 0.089669988  | 0 | -0.01531697  | 0 | 0            | 0 | 0            | 0 | 0.91823013   |
| 0 | 0.092732954  | 0 | 0            | 0 | 0            | 0 | 0.061439356  | 0 | 0.85401104   |
| 0 | 0.092722967  | 0 | 0            | 0 | 0            | 0 | 0.062293434  | 0 | 0.85728671   |

|   |             |   |              |   |              |   |             |            |
|---|-------------|---|--------------|---|--------------|---|-------------|------------|
| 0 | 0.096143322 | 0 | 0            | 0 | 0            | 0 | 0           | 0.90911071 |
| 0 | 0.096654335 | 0 | 0            | 0 | 0            | 0 | 0           | 0.90856188 |
| 0 | 0.096709523 | 0 | 0            | 0 | 0            | 0 | 0           | 0.91353635 |
| 0 | 0           | 0 | 0            | 0 | -0.097443531 | 0 | 0.065179927 | 0.95010123 |
| 0 | 0.042670445 | 0 | 0            | 0 | -0.10499601  | 0 | 0.027863462 | 0.95044233 |
| 0 | 0.042307001 | 0 | 0            | 0 | -0.1053431   | 0 | 0.026213002 | 0.9492211  |
| 0 | 0.041122312 | 0 | 0            | 0 | -0.10747681  | 0 | 0.024857667 | 0.95148517 |
| 0 | 0.041084447 | 0 | 0.000562376  | 0 | -0.10795681  | 0 | 0.025094222 | 0.95153868 |
| 0 | 0           | 0 | 0            | 0 | -0.095553975 | 0 | 0.064781337 | 0.9476858  |
| 0 | 0           | 0 | -0.004819198 | 0 | -0.091275093 | 0 | 0.066162331 | 0.94909146 |
| 0 | 0           | 0 | 0            | 0 | -0.095859485 | 0 | 0.065735469 | 0.95043274 |
| 0 | 0.051134633 | 0 | 0            | 0 | -0.087521555 | 0 | 0           | 0.96487544 |
| 0 | 0.050160261 | 0 | 0            | 0 | -0.089227589 | 0 | 0           | 0.96523359 |
| 0 | 0.050637447 | 0 | 0.000280258  | 0 | -0.0886374   | 0 | 0           | 0.9648337  |
| 0 | 0.050576551 | 0 | 0            | 0 | -0.088283914 | 0 | 0           | 0.96562874 |
| 0 | 0.049963308 | 0 | -0.000914463 | 0 | -0.088496499 | 0 | 0           | 0.9654143  |
| 0 | 0.051097798 | 0 | 9.47E-05     | 0 | -0.08743392  | 0 | 0           | 0.96502117 |
| 0 | 0           | 0 | -0.070257341 | 0 | 0            | 0 | 0.06566442  | 0.93065777 |
| 0 | 0.074692879 | 0 | -0.032983743 | 0 | 0            | 0 | 0           | 0.92745567 |
| 0 | 0           | 0 | -0.005051995 | 0 | -0.12003395  | 0 | 0.036634302 | 0.97978382 |
| 0 | 0           | 0 | 0            | 0 | -0.12294609  | 0 | 0.038850308 | 0.98011594 |
| 0 | 0           | 0 | 0            | 0 | -0.12348916  | 0 | 0.037588537 | 0.97994995 |
| 0 | 0           | 0 | 0            | 0 | -0.1211108   | 0 | 0.040237217 | 0.97840946 |
| 0 | 0           | 0 | -0.000785547 | 0 | -0.1204099   | 0 | 0.040333489 | 0.97822512 |
| 0 | 0           | 0 | -0.000695838 | 0 | -0.1210411   | 0 | 0.039264494 | 0.97829145 |
| 0 | 0.073111636 | 0 | 0            | 0 | -0.03475383  | 0 | 0           | 0.93229223 |
| 0 | 0.071856758 | 0 | 0            | 0 | -0.037080003 | 0 | 0           | 0.93911958 |
| 0 | 0.073413567 | 0 | -0.006208926 | 0 | -0.029012219 | 0 | 0           | 0.93690104 |
| 0 | 0.083399494 | 0 | -0.015935355 | 0 | 0            | 0 | 0           | 0.91758204 |
| 0 | 0.09074569  | 0 | 0            | 0 | 0            | 0 | 0           | 0.91335359 |
| 0 | 0.08804681  | 0 | -0.036476362 | 0 | 0            | 0 | 0.077032938 | 0          |
| 0 | 0           | 0 | 0            | 0 | -0.090554918 | 0 | 0.064260491 | 0.95058422 |
| 0 | 0           | 0 | -0.028193239 | 0 | -0.067603577 | 0 | 0           | 1.0056624  |
| 0 | 0           | 0 | 0            | 0 | -0.088994621 | 0 | 0.063635932 | 0.9476184  |
| 0 | 0           | 0 | -0.007248706 | 0 | -0.082421129 | 0 | 0.065357091 | 0.94882436 |
| 0 | 0           | 0 | 0            | 0 | -0.09314184  | 0 | 0           | 1.0079416  |
| 0 | 0           | 0 | -0.014210639 | 0 | -0.096566106 | 0 | 0           | 1.0094389  |
| 0 | 0           | 0 | -0.015130484 | 0 | -0.094833313 | 0 | 0           | 1.0107042  |
| 0 | 0           | 0 | 0            | 0 | -0.09354607  | 0 | 0           | 1.0128068  |
| 0 | 0.038011342 | 0 | 0            | 0 | -0.10204183  | 0 | 0.025515155 | 0.95652141 |
| 0 | 0.038730983 | 0 | 0            | 0 | -0.1006979   | 0 | 0.025075831 | 0.95367084 |
| 0 | 0.086289426 | 0 | 0            | 0 | -0.038719498 | 0 | 0.076088265 | 0          |
| 0 | 0.036610883 | 0 | -0.001914673 | 0 | -0.10246926  | 0 | 0.023193281 | 0.9570019  |
| 0 | 0           | 0 | 0            | 0 | -0.10544255  | 0 | 0           | 1.0116377  |
| 0 | 0.087511463 | 0 | 0            | 0 | -0.036300556 | 0 | 0.075245773 | 0          |
| 0 | 0.087855573 | 0 | -0.00867592  | 0 | -0.028114904 | 0 | 0.077067821 | 0          |
| 0 | 0.088067463 | 0 | 0            | 0 | -0.036221905 | 0 | 0.076304111 | 0          |

|   |             |   |              |   |              |   |             |   |              |
|---|-------------|---|--------------|---|--------------|---|-------------|---|--------------|
| 0 | 0           | 0 | 0            | 0 | -0.091404537 | 0 | 0           | 0 | 1.0082       |
| 0 | 0           | 0 | -0.002727296 | 0 | -0.088856168 | 0 | 0           | 0 | 1.0077158    |
| 0 | 0           | 0 | -0.067301401 | 0 | 0            | 0 | 0.064928685 | 0 | 0.93179819   |
| 0 | 0.097271064 | 0 | -0.01799628  | 0 | 0            | 0 | 0.075181006 | 0 | 0            |
| 0 | 0           | 0 | -0.001715054 | 0 | -0.096794302 | 0 | 0           | 0 | 1.0098375    |
| 0 | 0.09800683  | 0 | -0.01758242  | 0 | 0            | 0 | 0.07630202  | 0 | 0            |
| 0 | 0           | 0 | -0.002067795 | 0 | -0.089890415 | 0 | 0           | 0 | 1.0135041    |
| 0 | 0.045843013 | 0 | -0.001783068 | 0 | -0.084292316 | 0 | 0           | 0 | 0.96909261   |
| 0 | 0.045743363 | 0 | -0.002239177 | 0 | -0.084046997 | 0 | 0           | 0 | 0.96933305   |
| 0 | 0.046361722 | 0 | 0            | 0 | -0.085031761 | 0 | 0           | 0 | 0.96909133   |
| 0 | 0.10554648  | 0 | 0            | 0 | 0            | 0 | 0.072909977 | 0 | 0            |
| 0 | 0.10607494  | 0 | 0            | 0 | 0            | 0 | 0.073850379 | 0 | 0            |
| 0 | 0.10599672  | 0 | 0            | 0 | 0            | 0 | 0.073013014 | 0 | 0            |
| 0 | 0.080283695 | 0 | -0.038679247 | 0 | 0            | 0 | 0.077624844 | 0 | -0.075017862 |
| 0 | 0           | 0 | -0.066294259 | 0 | 0            | 0 | 0           | 0 | 0.9900006    |
| 0 | 0.075585812 | 0 | 0            | 0 | -0.046394454 | 0 | 0.076722668 | 0 | -0.062524483 |
| 0 | 0           | 0 | -0.043653622 | 0 | 0            | 0 | 0.063442838 | 0 | 0.93685128   |
| 0 | 0           | 0 | -0.066652512 | 0 | 0            | 0 | 0           | 0 | 0.99478059   |
| 0 | 0           | 0 | -0.005458291 | 0 | -0.11383853  | 0 | 0.034575771 | 0 | 0.98153468   |
| 0 | 0           | 0 | -0.003009294 | 0 | -0.11400476  | 0 | 0.03682494  | 0 | 0.98064242   |
| 0 | 0           | 0 | 0            | 0 | -0.11723037  | 0 | 0.036400206 | 0 | 0.98178938   |
| 0 | 0.076925152 | 0 | 0            | 0 | -0.043938304 | 0 | 0.076166629 | 0 | -0.066072128 |
| 0 | 0           | 0 | -0.043555591 | 0 | 0            | 0 | 0.064724235 | 0 | 0.94058162   |
| 0 | 0.077203774 | 0 | -0.007124725 | 0 | -0.037223024 | 0 | 0.077667734 | 0 | -0.065222297 |
| 0 | 0.077415531 | 0 | 0            | 0 | -0.043819699 | 0 | 0.076990317 | 0 | -0.064063843 |
| 0 | 0.090026033 | 0 | -0.019398121 | 0 | 0            | 0 | 0.076058174 | 0 | -0.083099962 |
| 0 | 0.090673913 | 0 | -0.019011157 | 0 | 0            | 0 | 0.076959875 | 0 | -0.080883345 |
| 0 | 0           | 0 | -0.02964624  | 0 | -0.059557789 | 0 | 0           | 0 | 1.0048041    |
| 0 | 0.083048457 | 0 | -0.035037275 | 0 | 0            | 0 | 0.07613997  | 0 | 0            |
| 0 | 0           | 0 | 0            | 0 | -0.086379402 | 0 | 0           | 0 | 1.0067737    |
| 0 | 0.098989704 | 0 | 0            | 0 | 0            | 0 | 0.073694497 | 0 | -0.08824461  |
| 0 | 0.099448847 | 0 | 0            | 0 | 0            | 0 | 0.074417596 | 0 | -0.086209978 |
| 0 | 0.09944457  | 0 | 0            | 0 | 0            | 0 | 0.073811098 | 0 | -0.088641044 |
| 0 | 0           | 0 | -0.013736776 | 0 | -0.09245983  | 0 | 0           | 0 | 1.0091663    |
| 0 | 0           | 0 | -0.005145868 | 0 | -0.080136541 | 0 | 0           | 0 | 1.005961     |
| 0 | 0.031569992 | 0 | -0.020919876 | 0 | -0.058347731 | 0 | 0.076106703 | 0 | 0            |
| 0 | 0.091648267 | 0 | -0.018068142 | 0 | 0            | 0 | 0.074181076 | 0 | 0            |
| 0 | 0           | 0 | -0.042523834 | 0 | 0            | 0 | 0.062725262 | 0 | 0.93694942   |
| 0 | 0.084254134 | 0 | 0            | 0 | -0.031307626 | 0 | 0.073934051 | 0 | 0            |
| 0 | 0.083236944 | 0 | 0            | 0 | -0.033310363 | 0 | 0.075026588 | 0 | 0            |
| 0 | 0.084691006 | 0 | -0.011159165 | 0 | -0.020734406 | 0 | 0.076111748 | 0 | 0            |
| 0 | 0           | 0 | -0.063376041 | 0 | 0            | 0 | 0           | 0 | 0.98975309   |
| 0 | 0.034690693 | 0 | 0            | 0 | -0.075315946 | 0 | 0.07519596  | 0 | 0            |
| 0 | 0.034448818 | 0 | 0            | 0 | -0.07558773  | 0 | 0.075344532 | 0 | 0            |
| 0 | 0.09996581  | 0 | 0            | 0 | 0            | 0 | 0.071907597 | 0 | 0            |
| 0 | 0.088385274 | 0 | -0.031806925 | 0 | 0            | 0 | 0           | 0 | 0            |
| 0 | 0.035152936 | 0 | 0            | 0 | -0.073662963 | 0 | 0.075605104 | 0 | 0            |

|   |             |   |              |   |              |   |              |   |              |
|---|-------------|---|--------------|---|--------------|---|--------------|---|--------------|
| 0 | 0.035368553 | 0 | -0.0006299   | 0 | -0.072967964 | 0 | 0.075835041  | 0 | 0            |
| 0 | 0.034915476 | 0 | -0.000808479 | 0 | -0.073170207 | 0 | 0.075826528  | 0 | 0            |
| 0 | 0.075309634 | 0 | -0.037278035 | 0 | 0            | 0 | 0.076677063  | 0 | -0.069203636 |
| 0 | 0.088939237 | 0 | -0.031991867 | 0 | 0            | 0 | 0            | 0 | 0            |
| 0 | 0.086389055 | 0 | -0.028906405 | 0 | -0.007514023 | 0 | 0            | 0 | 0            |
| 0 | 0.087252528 | 0 | 0            | 0 | -0.032985587 | 0 | 0            | 0 | 0            |
| 0 | 0           | 0 | -0.040482739 | 0 | 0            | 0 | 0            | 0 | 0.99691997   |
| 0 | 0.072500562 | 0 | 0            | 0 | -0.041098008 | 0 | 0.075640121  | 0 | -0.058857556 |
| 0 | 0.089165264 | 0 | 0            | 0 | -0.030261793 | 0 | 0            | 0 | 0            |
| 0 | 0.08789388  | 0 | 0            | 0 | -0.033004787 | 0 | 0            | 0 | 0            |
| 0 | 0.068663603 | 0 | -0.051910494 | 0 | 0            | 0 | -0.018448645 | 0 | 0.9662289    |
| 0 | 0.07364155  | 0 | 0            | 0 | -0.039045928 | 0 | 0.074841336  | 0 | -0.0627323   |
| 0 | 0.088803881 | 0 | -0.006428225 | 0 | -0.024439056 | 0 | 0            | 0 | 0            |
| 0 | 0.074013407 | 0 | -0.009583167 | 0 | -0.029964865 | 0 | 0.076693119  | 0 | -0.061976131 |
| 0 | 0.035234586 | 0 | -0.050759882 | 0 | 0            | 0 | 0.074492872  | 0 | 0            |
| 0 | 0.035535186 | 0 | -0.050938449 | 0 | 0            | 0 | 0.075079164  | 0 | 0            |
| 0 | 0.097732184 | 0 | -0.014108839 | 0 | 0            | 0 | 0            | 0 | 0            |
| 0 | 0.084449276 | 0 | -0.019476425 | 0 | 0            | 0 | 0.075004968  | 0 | -0.077468629 |
| 0 | 0.089546473 | 0 | -0.005582172 | 0 | -0.025155627 | 0 | 0            | 0 | 0            |
| 0 | 0.10420949  | 0 | 0            | 0 | 0            | 0 | 0            | 0 | 0            |
| 0 | 0.066325151 | 0 | -0.057248578 | 0 | 0            | 0 | 0            | 0 | 0.95425218   |
| 0 | 0.06499376  | 0 | -0.05979675  | 0 | 0            | 0 | 0            | 0 | 0.95531223   |
| 0 | 0           | 0 | -0.032678786 | 0 | -0.06766396  | 0 | 0.077138596  | 0 | 0            |
| 0 | 0           | 0 | 0            | 0 | 0            | 0 | 0.057476853  | 0 | 0.95161788   |
| 0 | 0           | 0 | -0.033703311 | 0 | -0.066924515 | 0 | 0.078040407  | 0 | 0            |
| 0 | 0           | 0 | -0.035195998 | 0 | -0.065501124 | 0 | 0.07841228   | 0 | 0            |
| 0 | 0           | 0 | -0.032387046 | 0 | -0.068381058 | 0 | 0.077973348  | 0 | 0.003461878  |
| 0 | 0           | 0 | 0            | 0 | 0            | 0 | 0.058523174  | 0 | 0.95497858   |
| 0 | 0           | 0 | 0            | 0 | 0            | 0 | 0.057734294  | 0 | 0.95150244   |
| 0 | 0.093456261 | 0 | 0            | 0 | 0            | 0 | 0.07263696   | 0 | -0.082629512 |
| 0 | 0.066997986 | 0 | -0.053078476 | 0 | 0            | 0 | -0.029327443 | 0 | 0.9687089    |
| 0 | 0.06562224  | 0 | -0.055634126 | 0 | 0            | 0 | -0.030510312 | 0 | 0.97052484   |
| 0 | 0.07998964  | 0 | -0.034218953 | 0 | 0            | 0 | 0            | 0 | -0.075033501 |
| 0 | 0.074925353 | 0 | -0.02659991  | 0 | -0.01782957  | 0 | 0            | 0 | -0.064785014 |
| 0 | 0.080472174 | 0 | -0.034359933 | 0 | 0            | 0 | 0            | 0 | -0.071869321 |
| 0 | 0           | 0 | 0            | 0 | -0.097864223 | 0 | 0.075864187  | 0 | 0.00779535   |
| 0 | 0.075714123 | 0 | 0            | 0 | -0.041306378 | 0 | 0            | 0 | -0.063966395 |
| 0 | 0           | 0 | 0            | 0 | -0.098156664 | 0 | 0.076628644  | 0 | 0.00997729   |
| 0 | 0           | 0 | 0            | 0 | -0.097344391 | 0 | 0.075865361  | 0 | 0            |
| 0 | 0           | 0 | 0            | 0 | -0.097471966 | 0 | 0.076009672  | 0 | 0            |
| 0 | 0.076211694 | 0 | 0            | 0 | -0.041408801 | 0 | 0            | 0 | -0.06070736  |
| 0 | 0.050856307 | 0 | 0            | 0 | -0.10513853  | 0 | 0.034194909  | 0 | 0            |
| 0 | 0           | 0 | 0            | 0 | -0.097890297 | 0 | 0.077029687  | 0 | 0            |
| 0 | 0.030608878 | 0 | -0.022931083 | 0 | -0.05010652  | 0 | 0.075273951  | 0 | 0            |
| 0 | 0.077700338 | 0 | 0            | 0 | -0.038478673 | 0 | 0            | 0 | -0.065901363 |
| 0 | 0.049208962 | 0 | 0            | 0 | -0.10816631  | 0 | 0.03257282   | 0 | 0            |
| 0 | 0.05093847  | 0 | 0.006336184  | 0 | -0.11064132  | 0 | 0.032888588  | 0 | 0            |

|   |             |   |              |   |              |   |             |   |              |
|---|-------------|---|--------------|---|--------------|---|-------------|---|--------------|
| 0 | 0.049087997 | 0 | -0.000756938 | 0 | -0.10753471  | 0 | 0.032771712 | 0 | 0            |
| 0 | 0.049727033 | 0 | 0            | 0 | -0.10691006  | 0 | 0.031622795 | 0 | 0            |
| 0 | 0.077319836 | 0 | -0.00465421  | 0 | -0.034392195 | 0 | 0           | 0 | -0.066512506 |
| 0 | 0.047385656 | 0 | -0.000620715 | 0 | -0.11039371  | 0 | 0.029495436 | 0 | 0            |
| 0 | 0           | 0 | -0.005866514 | 0 | -0.090651185 | 0 | 0.076695224 | 0 | 0.006520379  |
| 0 | 0           | 0 | 0            | 0 | -0.096272268 | 0 | 0.076244118 | 0 | 0.007715782  |
| 0 | 0           | 0 | -0.007165029 | 0 | -0.088965199 | 0 | 0.076776857 | 0 | 0            |
| 0 | 0           | 0 | -0.007474211 | 0 | -0.08869686  | 0 | 0.076910815 | 0 | 0            |
| 0 | 0.077945284 | 0 | -0.003878781 | 0 | -0.035058249 | 0 | 0           | 0 | -0.062840232 |
| 0 | 0           | 0 | -0.005442336 | 0 | -0.091394693 | 0 | 0.077691903 | 0 | 0.009222837  |
| 0 | 0           | 0 | 0            | 0 | -0.095882853 | 0 | 0.076394327 | 0 | 0            |
| 0 | 0.033360396 | 0 | 0            | 0 | -0.069121081 | 0 | 0.074179087 | 0 | 0            |
| 0 | 0           | 0 | -0.007002921 | 0 | -0.089581587 | 0 | 0.078195472 | 0 | 0            |
| 0 | 0.089853538 | 0 | -0.015591998 | 0 | 0            | 0 | 0           | 0 | -0.081218364 |
| 0 | 0.043688342 | 0 | -0.027708679 | 0 | 0            | 0 | 0.073849412 | 0 | 0            |
| 0 | 0.03345296  | 0 | -0.003521038 | 0 | -0.064689046 | 0 | 0.074770893 | 0 | 0            |
| 0 | 0.041478402 | 0 | 0            | 0 | -0.10915328  | 0 | 0.037312304 | 0 | -0.023769132 |
| 0 | 0.04035632  | 0 | 0            | 0 | -0.11121912  | 0 | 0.036140657 | 0 | -0.022448345 |
| 0 | 0.040306064 | 0 | 0.000436236  | 0 | -0.11162239  | 0 | 0.036355312 | 0 | -0.022361038 |
| 0 | 0.097071161 | 0 | 0            | 0 | 0            | 0 | 0           | 0 | -0.085373789 |
| 0 | 0.041425625 | 0 | 0.006298612  | 0 | -0.11483082  | 0 | 0.035748012 | 0 | -0.024869777 |
| 0 | 0.083562255 | 0 | -0.030336404 | 0 | 0            | 0 | 0           | 0 | 0            |
| 0 | 0.040209062 | 0 | 0            | 0 | -0.11112572  | 0 | 0.034503451 | 0 | -0.024850825 |
| 0 | 0.03846094  | 0 | 0.000559561  | 0 | -0.11464224  | 0 | 0.032912121 | 0 | -0.023047927 |
| 0 | 0           | 0 | 0            | 0 | 0            | 0 | 0.056888072 | 0 | 0.95131764   |
| 0 | 0.062745103 | 0 | -0.061543936 | 0 | 0            | 0 | 0           | 0 | 0.94591729   |
| 0 | 0           | 0 | -0.072065581 | 0 | 0            | 0 | 0.076430319 | 0 | 0            |
| 0 | 0.028093925 | 0 | 0.004598612  | 0 | -0.11777481  | 0 | 0.042174686 | 0 | 0            |
| 0 | 0.027518553 | 0 | 0.002271304  | 0 | -0.11734042  | 0 | 0.040957662 | 0 | 0            |
| 0 | 0.027343325 | 0 | 0            | 0 | -0.11494098  | 0 | 0.041333169 | 0 | 0            |
| 0 | 0           | 0 | -0.072418674 | 0 | 0            | 0 | 0.077459487 | 0 | 0            |
| 0 | 0.083461042 | 0 | -0.030557401 | 0 | -0.000697189 | 0 | 0           | 0 | 0            |
| 0 | 0           | 0 | -0.071013379 | 0 | 0            | 0 | 0.076339365 | 0 | -0.007334543 |
| 0 | 0.026300352 | 0 | 0.006241262  | 0 | -0.12121136  | 0 | 0.039582555 | 0 | 0            |
| 0 | 0           | 0 | -0.069864504 | 0 | 0            | 0 | 0.075904267 | 0 | 0            |
| 0 | 0.059631013 | 0 | 0            | 0 | -0.086859395 | 0 | 0           | 0 | 0            |
| 0 | 0.05916558  | 0 | -0.001103246 | 0 | -0.086665137 | 0 | 0           | 0 | 0            |
| 0 | 0.059339677 | 0 | -0.000276781 | 0 | -0.087087054 | 0 | 0           | 0 | 0            |
| 0 | 0           | 0 | -0.071273028 | 0 | 0            | 0 | 0.077097209 | 0 | -0.005218296 |
| 0 | 0.033811928 | 0 | -0.04882844  | 0 | 0            | 0 | 0.074153291 | 0 | 0            |
| 0 | 0.063294679 | 0 | -0.051877114 | 0 | 0            | 0 | -0.01850575 | 0 | 0.97057138   |
| 0 | 0.05943421  | 0 | -0.000730381 | 0 | -0.086276988 | 0 | 0           | 0 | 0            |
| 0 | 0.084354748 | 0 | 0            | 0 | -0.027624572 | 0 | 0           | 0 | 0            |
| 0 | 0.085792649 | 0 | -0.008890536 | 0 | -0.017122308 | 0 | 0           | 0 | 0            |
| 0 | 0.061707075 | 0 | -0.055765256 | 0 | 0            | 0 | 0           | 0 | 0.95792288   |
| 0 | 0           | 0 | 0            | 0 | 0            | 0 | 0           | 0 | 1.00527      |
| 0 | 0.033776282 | 0 | -0.017961041 | 0 | -0.054979488 | 0 | 0           | 0 | 0            |

|   |             |   |              |   |              |   |              |              |
|---|-------------|---|--------------|---|--------------|---|--------------|--------------|
| 0 | 0.032626919 | 0 | -0.017734535 | 0 | -0.0559184   | 0 | 0            | 0            |
| 0 | 0           | 0 | -0.034017171 | 0 | -0.059606854 | 0 | 0.076080601  | 0            |
| 0 | 0.052699707 | 0 | 0            | 0 | 0            | 0 | 0.070249603  | 0            |
| 0 | 0.0625626   | 0 | -0.051715701 | 0 | 0            | 0 | -0.027888567 | 0.97182179   |
| 0 | 0           | 0 | -0.033832657 | 0 | -0.060247609 | 0 | 0.077116361  | 0.00382941   |
| 0 | 0           | 0 | -0.036643799 | 0 | -0.057357453 | 0 | 0.077559352  | 0            |
| 0 | 0.093668299 | 0 | 0            | 0 | 0            | 0 | -0.02957086  | 0.96568808   |
| 0 | 0.035248543 | 0 | 0            | 0 | -0.07029648  | 0 | 0            | 0            |
| 0 | 0.050853139 | 0 | 0            | 0 | -0.089256216 | 0 | 0            | -0.034355882 |
| 0 | 0.050351461 | 0 | -0.00092475  | 0 | -0.089260843 | 0 | 0            | -0.034348573 |
| 0 | 0.051307654 | 0 | 4.43E-05     | 0 | -0.088478895 | 0 | 0            | -0.034861556 |
| 0 | 0.050496302 | 0 | -0.001451578 | 0 | -0.08828166  | 0 | 0            | -0.034324848 |
| 0 | 0           | 0 | -0.00405554  | 0 | -0.12472162  | 0 | 0.046391246  | 0.013324082  |
| 0 | 0.07520838  | 0 | -0.032785673 | 0 | 0            | 0 | 0            | -0.069899543 |
| 0 | 0           | 0 | 0            | 0 | -0.12755755  | 0 | 0.046994836  | 0.013956055  |
| 0 | 0           | 0 | -0.000745605 | 0 | -0.12573691  | 0 | 0.047918057  | 0.013620584  |
| 0 | 0           | 0 | -0.003052508 | 0 | -0.12622102  | 0 | 0.044784573  | 0.012208388  |
| 0 | 0.03608034  | 0 | 0.002036668  | 0 | -0.070259424 | 0 | 0            | 0            |
| 0 | 0           | 0 | -0.00586022  | 0 | -0.12383713  | 0 | 0.045528705  | 0            |
| 0 | 0           | 0 | -0.005167207 | 0 | -0.12486382  | 0 | 0.044405259  | 0            |
| 0 | 0           | 0 | 0            | 0 | -0.12793034  | 0 | 0.046475935  | 0            |
| 0 | 0           | 0 | -0.002248833 | 0 | -0.12494035  | 0 | 0.047222326  | 0            |
| 0 | 0           | 0 | -0.007162453 | 0 | -0.12317544  | 0 | 0.044703241  | 0            |
| 0 | 0.071987122 | 0 | -0.028227107 | 0 | -0.011133497 | 0 | 0            | -0.061640173 |
| 0 | 0           | 0 | 0            | 0 | -0.090948779 | 0 | 0.074739128  | 0.007951538  |
| 0 | 0           | 0 | 0            | 0 | -0.090553428 | 0 | 0.074885438  | 0            |
| 0 | 0.072811897 | 0 | 0            | 0 | -0.036032675 | 0 | 0            | -0.061007657 |
| 0 | 0.092643869 | 0 | 0            | 0 | 0            | 0 | -0.040528736 | 0.96757346   |
| 0 | 0.030339259 | 0 | -0.002802251 | 0 | -0.093080635 | 0 | 0            | 0            |
| 0 | 0           | 0 | -0.008328216 | 0 | -0.081765741 | 0 | 0.075699442  | 0.006187859  |
| 0 | 0           | 0 | -0.009931832 | 0 | -0.07982538  | 0 | 0.075914246  | 0            |
| 0 | 0.074306755 | 0 | -0.007096313 | 0 | -0.027172943 | 0 | 0            | -0.063930304 |
| 0 | 0.036617971 | 0 | -0.046334101 | 0 | 0            | 0 | 0            | 0            |
| 0 | 0           | 0 | -0.079927977 | 0 | 0            | 0 | -0.013964104 | 1.0228929    |
| 0 | 0.094158263 | 0 | 0            | 0 | 0            | 0 | 0            | 0.94454181   |
| 0 | 0           | 0 | -0.069063428 | 0 | 0            | 0 | 0.075527323  | 0            |
| 0 | 0           | 0 | -0.068018944 | 0 | 0            | 0 | 0.075424575  | -0.006471966 |
| 0 | 0.046981701 | 0 | 0            | 0 | -0.10081722  | 0 | 0.032515114  | 0            |
| 0 | 0.04708733  | 0 | 0.005054549  | 0 | -0.10517398  | 0 | 0.031550896  | 0            |
| 0 | 0           | 0 | -0.082667811 | 0 | 0            | 0 | 0            | 1.0123024    |
| 0 | 0.04429801  | 0 | -0.003278487 | 0 | -0.10236545  | 0 | 0.030385838  | 0            |
| 0 | 0           | 0 | -0.067317393 | 0 | 0            | 0 | -0.008047776 | 1.0189067    |
| 0 | 0           | 0 | -0.029790395 | 0 | -0.065471251 | 0 | 0            | 0            |
| 0 | 0           | 0 | -0.031700836 | 0 | -0.063524744 | 0 | 0            | 0            |
| 0 | 0           | 0 | -0.02875832  | 0 | -0.066673516 | 0 | 0            | 0.003016133  |
| 0 | 0           | 0 | -0.079722118 | 0 | 0            | 0 | -0.023515683 | 1.023634     |
| 0 | 0.037611772 | 0 | 0            | 0 | -0.10487892  | 0 | 0.03563492   | -0.01978907  |

|   |             |   |              |   |              |   |              |   |              |
|---|-------------|---|--------------|---|--------------|---|--------------|---|--------------|
| 0 | 0.037581737 | 0 | 0.005021156  | 0 | -0.10941942  | 0 | 0.03441041   | 0 | -0.020679115 |
| 0 | 0           | 0 | -0.029052103 | 0 | -0.066832888 | 0 | 0            | 0 | 0.006585129  |
| 0 | 0.035515653 | 0 | -0.002060605 | 0 | -0.10650317  | 0 | 0.033981663  | 0 | -0.017816557 |
| 0 | 0           | 0 | -0.032073692 | 0 | -0.063705572 | 0 | 0            | 0 | 0            |
| 0 | 0.026462214 | 0 | 0.003671266  | 0 | -0.11203434  | 0 | 0.039692168  | 0 | 0            |
| 0 | 0.088559003 | 0 | 0            | 0 | 0            | 0 | -0.029011481 | 0 | 0.96903933   |
| 0 | 0           | 0 | 0            | 0 | -0.093128189 | 0 | 0            | 0 | 0.008693488  |
| 0 | 0.091752442 | 0 | 0            | 0 | 0            | 0 | -0.051933269 | 0 | 0.99311176   |
| 0 | 0.055075302 | 0 | -0.001319908 | 0 | -0.082670959 | 0 | 0            | 0 | 0            |
| 0 | 0           | 0 | 0            | 0 | -0.092697806 | 0 | 0            | 0 | 0            |
| 0 | 0           | 0 | -0.04510782  | 0 | 0            | 0 | 0.075085756  | 0 | 0            |
| 0 | 0.031369159 | 0 | -0.019583999 | 0 | -0.04810677  | 0 | 0            | 0 | 0            |
| 0 | 0           | 0 | -0.014219351 | 0 | -0.097594517 | 0 | 0            | 0 | 0.009142937  |
| 0 | 0           | 0 | -0.0443454   | 0 | 0            | 0 | 0.074950944  | 0 | -0.003067647 |
| 0 | 0           | 0 | -0.015898119 | 0 | -0.097189467 | 0 | 0            | 0 | 0            |
| 0 | 0           | 0 | -0.002923461 | 0 | -0.088651282 | 0 | 0            | 0 | 0.008006397  |
| 0 | 0           | 0 | -0.004655601 | 0 | -0.086517434 | 0 | 0            | 0 | 0            |
| 0 | 0           | 0 | -0.077067186 | 0 | 0            | 0 | -0.013766825 | 0 | 1.0224369    |
| 0 | 0.046169132 | 0 | -0.002025676 | 0 | -0.084739067 | 0 | 0            | 0 | -0.029883046 |
| 0 | 0           | 0 | -0.004209137 | 0 | -0.11888169  | 0 | 0.043932549  | 0 | 0.013737036  |
| 0 | 0           | 0 | -0.067809427 | 0 | 0            | 0 | 0            | 0 | 0            |
| 0 | 0           | 0 | -0.00602324  | 0 | -0.11798098  | 0 | 0.043077096  | 0 | 0            |
| 0 | 0           | 0 | -0.066677615 | 0 | 0            | 0 | 0            | 0 | -0.005550811 |
| 0 | 0           | 0 | -0.033081325 | 0 | -0.055589119 | 0 | 0            | 0 | 0            |
| 0 | 0           | 0 | -0.030144248 | 0 | -0.058726869 | 0 | 0            | 0 | 0.00289343   |
| 0 | 0.076562287 | 0 | -0.052608737 | 0 | 0            | 0 | -0.01385977  | 0 | 0            |
| 0 | 0.075750339 | 0 | -0.054224588 | 0 | 0            | 0 | -0.014530481 | 0 | 0            |
| 0 | 0           | 0 | 0            | 0 | 0            | 0 | 0.068899341  | 0 | 0.004312536  |
| 0 | 0           | 0 | 0            | 0 | 0            | 0 | 0.069031916  | 0 | 0            |
| 0 | 0.075137455 | 0 | -0.055861334 | 0 | 0            | 0 | 0            | 0 | 0            |
| 0 | 0.075412833 | 0 | -0.052816614 | 0 | 0            | 0 | -0.024674964 | 0 | 0            |
| 0 | 0.067787439 | 0 | -0.055190782 | 0 | 0            | 0 | -0.012513703 | 0 | -0.053216341 |
| 0 | 0.067864631 | 0 | -0.054978268 | 0 | 0            | 0 | -0.012314077 | 0 | -0.053290845 |
| 0 | 0.066670831 | 0 | -0.057847976 | 0 | 0            | 0 | 0            | 0 | -0.05140052  |
| 0 | 0.066608813 | 0 | -0.055223929 | 0 | 0            | 0 | -0.023772916 | 0 | -0.058948087 |
| 0 | 0.071894347 | 0 | -0.051179618 | 0 | 0            | 0 | -0.013427731 | 0 | 0            |
| 0 | 0.036867644 | 0 | -0.062920436 | 0 | 0            | 0 | -0.008408688 | 0 | 0            |
| 0 | 0.10201606  | 0 | 0            | 0 | 0            | 0 | -0.024841236 | 0 | 0            |
| 0 | 0.063248816 | 0 | -0.053574664 | 0 | 0            | 0 | -0.011910708 | 0 | -0.048588655 |
| 0 | 0           | 0 | 0            | 0 | 0            | 0 | -0.030899282 | 0 | 1.0599467    |
| 0 | 0.094479409 | 0 | 0            | 0 | 0            | 0 | -0.023689659 | 0 | -0.068031466 |
| 0 | 0           | 0 | -0.081929808 | 0 | 0            | 0 | -0.007508476 | 0 | 0.00488202   |
| 0 | 0           | 0 | -0.083215478 | 0 | 0            | 0 | -0.008061172 | 0 | 0            |
| 0 | 0.069579393 | 0 | -0.020232995 | 0 | 0.059090936  | 0 | 0.038101661  | 0 | 0.87274615   |
| 0 | 0.06880978  | 0 | 0            | 0 | 0.040165964  | 0 | 0.034726775  | 0 | 0.87422978   |
| 0 | 0.068431198 | 0 | 0            | 0 | 0.039507338  | 0 | 0.03632789   | 0 | 0.87963701   |
| 0 | 0.067572146 | 0 | -0.039028427 | 0 | 0.073449718  | 0 | 0            | 0 | 0.9064954    |

|   |             |   |              |   |              |   |              |              |
|---|-------------|---|--------------|---|--------------|---|--------------|--------------|
| 0 | 0.069784062 | 0 | -0.01894572  | 0 | 0.057935722  | 0 | 0            | 0.90242542   |
| 0 | 0.068693182 | 0 | 0            | 0 | 0.039591877  | 0 | 0            | 0.90762124   |
| 0 | 0.044278682 | 0 | 0            | 0 | 0            | 0 | 0.034373744  | 0.89777651   |
| 0 | 0.044749404 | 0 | 0.000521607  | 0 | 0            | 0 | 0.034564701  | 0.89743772   |
| 0 | 0.042268014 | 0 | -0.00381829  | 0 | 0            | 0 | 0.036227965  | 0.90345252   |
| 0 | 0.043292046 | 0 | -0.00237186  | 0 | 0            | 0 | 0            | 0.93116948   |
| 0 | 0           | 0 | -0.043184422 | 0 | 0.030222608  | 0 | 0.038707291  | 0.93645322   |
| 0 | 0           | 0 | -0.023194909 | 0 | 0            | 0 | 0.035908768  | 0.93679671   |
| 0 | 0           | 0 | -0.019113833 | 0 | 0.009646439  | 0 | 0.036731976  | 0.93879179   |
| 0 | 0           | 0 | -0.04058441  | 0 | 0.027757524  | 0 | 0            | 0.96802735   |
| 0 | 0           | 0 | 0            | 0 | -0.008225861 | 0 | 0.034995635  | 0.94444526   |
| 0 | 0.078607506 | 0 | -0.044476619 | 0 | 0.085995286  | 0 | 0.049169248  | 0            |
| 0 | 0.080954301 | 0 | -0.023057329 | 0 | 0.069386358  | 0 | 0.046958469  | 0            |
| 0 | 0.07999603  | 0 | 0            | 0 | 0.047389365  | 0 | 0.045243062  | 0            |
| 0 | 0.068069253 | 0 | -0.042318574 | 0 | 0.076131219  | 0 | 0.049766593  | -0.056784749 |
| 0 | 0.079585881 | 0 | -0.041354369 | 0 | 0.083643776  | 0 | 0            | 0            |
| 0 | 0.070380332 | 0 | -0.02140541  | 0 | 0.059905215  | 0 | 0.047801354  | -0.059360711 |
| 0 | 0.069311928 | 0 | 0            | 0 | 0.039326501  | 0 | 0.046106549  | -0.053951433 |
| 0 | 0.050598336 | 0 | -0.001452112 | 0 | 0            | 0 | 0.045389943  | 0            |
| 0 | 0.068552202 | 0 | -0.039120089 | 0 | 0.073295061  | 0 | 0            | -0.06060765  |
| 0 | 0.030350023 | 0 | -0.033959965 | 0 | 0.040712337  | 0 | 0.04764358   | 0            |
| 0 | 0.042996354 | 0 | -0.004290833 | 0 | 0            | 0 | 0.046054465  | -0.027961333 |
| 0 | 0           | 0 | -0.046641167 | 0 | 0.03304199   | 0 | 0.04878905   | 0            |
| 0 | 0           | 0 | -0.043907255 | 0 | 0.030059858  | 0 | 0.04862018   | 0.003752325  |
| 0 | 0.012037477 | 0 | 0.015416895  | 0 | -0.060627883 | 0 | -0.036551723 | 1.014504     |
| 0 | 0.010364506 | 0 | 0            | 0 | -0.049142134 | 0 | -0.036301526 | 1.0162002    |
| 0 | 0           | 0 | 0.011074128  | 0 | -0.062338443 | 0 | -0.030864138 | 1.0232385    |
| 0 | 0.003086927 | 0 | 0.021080994  | 0 | -0.078928284 | 0 | 0            | 0.99582249   |
| 0 | 0.000969442 | 0 | -0.009725213 | 0 | -0.053379044 | 0 | -0.044812033 | 1.0321415    |
| 0 | 0.028402681 | 0 | -0.01878157  | 0 | 0            | 0 | -0.058091207 | 1.0213588    |
| 0 | 0.011132496 | 0 | 0.015491457  | 0 | -0.064114212 | 0 | -0.025323975 | 0.019740694  |
| 0 | 0.020755532 | 0 | 0.015869479  | 0 | -0.059668248 | 0 | -0.028957342 | 0            |
| 0 | 0.079760542 | 0 | -0.037797546 | 0 | 0            | 0 | 0.066048181  | 0.85776589   |
| 0 | 0.074753271 | 0 | 0            | 0 | -0.046145239 | 0 | 0.065156596  | 0.87382283   |
| 0 | 0.076095449 | 0 | 0            | 0 | -0.043697111 | 0 | 0.064635369  | 0.87005101   |
| 0 | 0.076574627 | 0 | 0            | 0 | -0.043576571 | 0 | 0.065432015  | 0.87217241   |
| 0 | 0.076350395 | 0 | -0.006372427 | 0 | -0.037718423 | 0 | 0.066066691  | 0.87065093   |
| 0 | 0.089356827 | 0 | -0.018804624 | 0 | 0            | 0 | 0.064496528  | 0.85158482   |
| 0 | 0.089992171 | 0 | -0.018425362 | 0 | 0            | 0 | 0.065367314  | 0.85399181   |
| 0 | 0.098037003 | 0 | 0            | 0 | 0            | 0 | 0.062163293  | 0.84886157   |
| 0 | 0.098486232 | 0 | 0            | 0 | 0            | 0 | 0.062857238  | 0.85100722   |
| 0 | 0.098489223 | 0 | 0            | 0 | 0            | 0 | 0.062286166  | 0.84830328   |
| 0 | 0.074783743 | 0 | -0.036401352 | 0 | 0            | 0 | 0.065105408  | 0.86360062   |
| 0 | 0.079476194 | 0 | -0.033952883 | 0 | 0            | 0 | 0            | 0.91787001   |
| 0 | 0.074046206 | 0 | -0.025730286 | 0 | -0.0190718   | 0 | 0            | 0.93073055   |
| 0 | 0.079932484 | 0 | -0.034068764 | 0 | 0            | 0 | 0            | 0.9219752    |
| 0 | 0.074810497 | 0 | 0            | 0 | -0.041809724 | 0 | 0            | 0.93158441   |



|   |             |   |              |   |              |   |             |   |            |
|---|-------------|---|--------------|---|--------------|---|-------------|---|------------|
| 0 | 0.071661001 | 0 | 0            | 0 | -0.040859659 | 0 | 0.064080498 | 0 | 0.87745745 |
| 0 | 0.072803817 | 0 | 0            | 0 | -0.0388152   | 0 | 0.063316151 | 0 | 0.87331741 |
| 0 | 0.075336758 | 0 | 0            | 0 | -0.041786228 | 0 | 0           | 0 | 0.93576324 |
| 0 | 0.073151354 | 0 | -0.008835645 | 0 | -0.030462323 | 0 | 0.065100332 | 0 | 0.8736373  |
| 0 | 0.076751717 | 0 | 0            | 0 | -0.039037965 | 0 | 0           | 0 | 0.92964183 |
| 0 | 0.076386301 | 0 | -0.004286669 | 0 | -0.035290487 | 0 | 0           | 0 | 0.92926749 |
| 0 | 0.083774186 | 0 | -0.018888779 | 0 | 0            | 0 | 0.063448482 | 0 | 0.85705173 |
| 0 | 0.076976065 | 0 | -0.003566278 | 0 | -0.035893691 | 0 | 0           | 0 | 0.93419736 |
| 0 | 0           | 0 | -0.03105166  | 0 | -0.068793345 | 0 | 0.066344625 | 0 | 0.94077472 |
| 0 | 0.089219109 | 0 | -0.015534702 | 0 | 0            | 0 | 0           | 0 | 0.91268006 |
| 0 | 0.092499569 | 0 | 0            | 0 | 0            | 0 | 0.061110433 | 0 | 0.85430258 |
| 0 | 0.096414545 | 0 | 0            | 0 | 0            | 0 | 0           | 0 | 0.90847174 |
| 0 | 0           | 0 | 0            | 0 | -0.097054992 | 0 | 0.064276458 | 0 | 0.94774379 |
| 0 | 0           | 0 | 0            | 0 | -0.097337145 | 0 | 0.065013431 | 0 | 0.95004414 |
| 0 | 0.043450602 | 0 | 0            | 0 | -0.10364727  | 0 | 0.028496423 | 0 | 0.94893945 |
| 0 | 0.042762422 | 0 | 0            | 0 | -0.10496842  | 0 | 0.027646886 | 0 | 0.95047136 |
| 0 | 0.042690636 | 0 | 0.000521392  | 0 | -0.10544793  | 0 | 0.027873662 | 0 | 0.95053077 |
| 0 | 0.04325806  | 0 | 0.004762833  | 0 | -0.10816316  | 0 | 0.027004442 | 0 | 0.94862811 |
| 0 | 0.042358366 | 0 | 0            | 0 | -0.10536329  | 0 | 0.0259847   | 0 | 0.94927185 |
| 0 | 0.041148169 | 0 | 0.000658473  | 0 | -0.10804837  | 0 | 0.024868673 | 0 | 0.95159324 |
| 0 | 0           | 0 | -0.005118084 | 0 | -0.0905733   | 0 | 0.065073035 | 0 | 0.94617471 |
| 0 | 0           | 0 | 0            | 0 | -0.095465035 | 0 | 0.064665092 | 0 | 0.94766765 |
| 0 | 0           | 0 | -0.004717712 | 0 | -0.091279102 | 0 | 0.0660276   | 0 | 0.94907751 |
| 0 | 0.050610519 | 0 | 0            | 0 | -0.088465679 | 0 | 0           | 0 | 0.96550212 |
| 0 | 0.05114622  | 0 | 0.000267111  | 0 | -0.087750987 | 0 | 0           | 0 | 0.9649216  |
| 0 | 0.050002472 | 0 | -0.000632438 | 0 | -0.088916909 | 0 | 0           | 0 | 0.96524529 |
| 0 | 0.050289597 | 0 | -0.001300582 | 0 | -0.087584367 | 0 | 0           | 0 | 0.96568192 |
| 0 | 0.074663623 | 0 | -0.032531039 | 0 | 0            | 0 | 0           | 0 | 0.92188898 |
| 0 | 0           | 0 | -0.06992326  | 0 | 0            | 0 | 0.064754342 | 0 | 0.92840249 |
| 0 | 0           | 0 | -0.070174389 | 0 | 0            | 0 | 0.065487668 | 0 | 0.93062022 |
| 0 | 0.071072967 | 0 | -0.027366952 | 0 | -0.012384537 | 0 | 0           | 0 | 0.93270367 |
| 0 | 0.071871253 | 0 | 0            | 0 | -0.036550904 | 0 | 0           | 0 | 0.93324131 |
| 0 | 0           | 0 | -0.005779181 | 0 | -0.11892838  | 0 | 0.037793036 | 0 | 0.9800466  |
| 0 | 0           | 0 | -0.004980779 | 0 | -0.12011184  | 0 | 0.03649989  | 0 | 0.97984638 |
| 0 | 0           | 0 | 0            | 0 | -0.12296706  | 0 | 0.038705243 | 0 | 0.98019291 |
| 0 | 0           | 0 | -0.000718769 | 0 | -0.12047359  | 0 | 0.040211763 | 0 | 0.97830722 |
| 0 | 0.073335936 | 0 | -0.006750663 | 0 | -0.028060245 | 0 | 0           | 0 | 0.93043125 |
| 0 | 0           | 0 | -0.032499847 | 0 | -0.060654294 | 0 | 0.065495322 | 0 | 0.94081939 |
| 0 | 0.087972882 | 0 | -0.03609391  | 0 | 0            | 0 | 0.075896038 | 0 | 0          |
| 0 | 0.088381254 | 0 | -0.036198806 | 0 | 0            | 0 | 0.076730629 | 0 | 0          |
| 0 | 0           | 0 | -0.027939126 | 0 | -0.067297151 | 0 | 0           | 0 | 1.0006717  |
| 0 | 0.085219981 | 0 | -0.031958448 | 0 | -0.009961103 | 0 | 0.07717101  | 0 | 0          |
| 0 | 0           | 0 | 0            | 0 | -0.09013792  | 0 | 0.06315748  | 0 | 0.94766284 |
| 0 | 0           | 0 | -0.028151692 | 0 | -0.067511625 | 0 | 0           | 0 | 1.0053791  |
| 0 | 0           | 0 | -0.007586149 | 0 | -0.0816728   | 0 | 0.064083833 | 0 | 0.94536482 |
| 0 | 0           | 0 | 0            | 0 | -0.093023951 | 0 | 0           | 0 | 1.0077269  |
| 0 | 0.086253209 | 0 | 0            | 0 | -0.03824857  | 0 | 0.074899172 | 0 | 0          |

|   |             |   |              |   |              |   |              |              |
|---|-------------|---|--------------|---|--------------|---|--------------|--------------|
| 0 | 0           | 0 | -0.014029105 | 0 | -0.096839027 | 0 | 0            | 1.0093918    |
| 0 | 0.039596804 | 0 | 0            | 0 | -0.099376191 | 0 | 0.026800415  | 0.95348336   |
| 0 | 0.086744241 | 0 | 0            | 0 | -0.038216142 | 0 | 0.075780955  | 0            |
| 0 | 0.03942833  | 0 | 0.003497461  | 0 | -0.10276417  | 0 | 0.025648375  | 0.95324669   |
| 0 | 0.037944754 | 0 | -0.001948303 | 0 | -0.10035459  | 0 | 0.025488562  | 0.95618927   |
| 0 | 0.0877518   | 0 | -0.009032011 | 0 | -0.027340621 | 0 | 0.075695884  | 0            |
| 0 | 0.087944422 | 0 | 0            | 0 | -0.035820695 | 0 | 0.074993962  | 0            |
| 0 | 0.088284033 | 0 | -0.008476607 | 0 | -0.027823711 | 0 | 0.076786089  | 0            |
| 0 | 0           | 0 | -0.066928472 | 0 | 0            | 0 | 0.06384558   | 0.92906979   |
| 0 | 0.09760639  | 0 | -0.017697537 | 0 | 0            | 0 | 0.074924207  | 0            |
| 0 | 0           | 0 | -0.002591092 | 0 | -0.088874714 | 0 | 0            | 1.0075709    |
| 0 | 0.045945206 | 0 | -0.001893562 | 0 | -0.08401219  | 0 | 0            | 0.9691682    |
| 0 | 0.10577682  | 0 | 0            | 0 | 0            | 0 | 0.072622974  | 0            |
| 0 | 0.074688958 | 0 | -0.029873383 | 0 | -0.019443928 | 0 | 0.077799787  | -0.067680512 |
| 0 | 0.080243706 | 0 | -0.038366131 | 0 | 0            | 0 | 0.076727626  | -0.076994316 |
| 0 | 0.080611297 | 0 | -0.038409445 | 0 | 0            | 0 | 0.07733533   | -0.075280766 |
| 0 | 0           | 0 | -0.066206512 | 0 | 0            | 0 | 0            | 0.9897987    |
| 0 | 0.075588326 | 0 | 0            | 0 | -0.045992589 | 0 | 0.075788768  | -0.064712768 |
| 0 | 0.076023678 | 0 | 0            | 0 | -0.045913174 | 0 | 0.076436899  | -0.062951268 |
| 0 | 0           | 0 | -0.043563763 | 0 | 0            | 0 | 0.063330046  | 0.9368614    |
| 0 | 0           | 0 | -0.005931682 | 0 | -0.11310747  | 0 | 0.035324627  | 0.98171289   |
| 0 | 0.077152803 | 0 | -0.00741991  | 0 | -0.036558133 | 0 | 0.076581034  | -0.067772517 |
| 0 | 0.07733707  | 0 | 0            | 0 | -0.043484078 | 0 | 0.075941254  | -0.066425828 |
| 0 | 0.077614825 | 0 | -0.006937202 | 0 | -0.036942929 | 0 | 0.077405902  | -0.065583448 |
| 0 | 0           | 0 | -0.02928199  | 0 | -0.059389817 | 0 | 0            | 0.99922928   |
| 0 | 0.090355329 | 0 | -0.019106927 | 0 | 0            | 0 | 0.075810106  | -0.083311614 |
| 0 | 0.082994762 | 0 | -0.034602311 | 0 | 0            | 0 | 0.07479813   | 0            |
| 0 | 0.099219532 | 0 | 0            | 0 | 0            | 0 | 0.07341319   | -0.08839883  |
| 0 | 0.082144365 | 0 | -0.033613501 | 0 | -0.003137236 | 0 | 0.076184034  | 0            |
| 0 | 0.084584395 | 0 | -0.011546019 | 0 | -0.019940507 | 0 | 0.074560202  | 0            |
| 0 | 0.083208788 | 0 | 0            | 0 | -0.032815562 | 0 | 0.073624852  | 0            |
| 0 | 0.031705945 | 0 | -0.020804135 | 0 | -0.058228724 | 0 | 0.07587539   | 0            |
| 0 | 0.031585966 | 0 | -0.020926326 | 0 | -0.058335148 | 0 | 0.076118566  | 0            |
| 0 | 0.034603725 | 0 | 0            | 0 | -0.075358423 | 0 | 0.07513943   | 0            |
| 0 | 0.088788831 | 0 | -0.031501313 | 0 | 0            | 0 | 0            | 0            |
| 0 | 0.075290239 | 0 | -0.036908954 | 0 | 0            | 0 | 0.075583587  | -0.071684716 |
| 0 | 0.086319203 | 0 | -0.028494069 | 0 | -0.007291198 | 0 | 0            | 0            |
| 0 | 0.03507884  | 0 | -0.000637569 | 0 | -0.073094743 | 0 | 0.075649242  | 0            |
| 0 | 0.071585486 | 0 | -0.031502005 | 0 | -0.012747097 | 0 | 0.076793811  | -0.064331719 |
| 0 | 0.086947708 | 0 | -0.028814747 | 0 | -0.007001766 | 0 | 0            | 0            |
| 0 | 0.087792549 | 0 | 0            | 0 | -0.032419666 | 0 | 0            | 0            |
| 0 | 0.072516353 | 0 | 0            | 0 | -0.040657472 | 0 | 0.07449946   | -0.061585182 |
| 0 | 0.073964406 | 0 | -0.009921145 | 0 | -0.029248749 | 0 | 0.075410652  | -0.065031478 |
| 0 | 0.089325139 | 0 | -0.006192584 | 0 | -0.024109302 | 0 | 0            | 0            |
| 0 | 0.06872884  | 0 | -0.051866822 | 0 | 0            | 0 | -0.018590185 | 0.96626185   |
| 0 | 0.068157854 | 0 | -0.052862505 | 0 | 0            | 0 | -0.018763075 | 0.96688104   |
| 0 | 0.035705301 | 0 | -0.050746213 | 0 | 0            | 0 | 0.074875552  | 0            |

|   |             |   |              |   |              |   |              |              |
|---|-------------|---|--------------|---|--------------|---|--------------|--------------|
| 0 | 0.066335832 | 0 | -0.057249597 | 0 | 0            | 0 | 0            | 0.95423349   |
| 0 | 0           | 0 | -0.034890176 | 0 | -0.065305195 | 0 | 0.077257403  | 0            |
| 0 | 0           | 0 | -0.032633628 | 0 | -0.067605226 | 0 | 0.076967165  | 0            |
| 0 | 0           | 0 | 0            | 0 | 0            | 0 | 0.057279847  | 0.95157809   |
| 0 | 0           | 0 | -0.03215625  | 0 | -0.068219738 | 0 | 0.077092399  | 0.001471831  |
| 0 | 0           | 0 | -0.03515706  | 0 | -0.065432419 | 0 | 0.078245922  | 0            |
| 0 | 0           | 0 | -0.032349248 | 0 | -0.068310953 | 0 | 0.07780689   | 0.003465095  |
| 0 | 0.074933827 | 0 | -0.026257316 | 0 | -0.017570574 | 0 | 0            | -0.06837115  |
| 0 | 0.080389785 | 0 | -0.03391989  | 0 | 0            | 0 | 0            | -0.075299197 |
| 0 | 0.067017978 | 0 | -0.053063684 | 0 | 0            | 0 | -0.029381264 | 0.96871992   |
| 0 | 0.075466082 | 0 | -0.026487793 | 0 | -0.017383788 | 0 | 0            | -0.065295148 |
| 0 | 0.076246515 | 0 | 0            | 0 | -0.040751199 | 0 | 0            | -0.064424602 |
| 0 | 0           | 0 | 0            | 0 | -0.097765911 | 0 | 0.075713816  | 0.007821301  |
| 0 | 0           | 0 | 0            | 0 | -0.097375108 | 0 | 0.075861461  | 0            |
| 0 | 0.051809966 | 0 | 0.005144392  | 0 | -0.10828924  | 0 | 0.034905585  | 0            |
| 0 | 0.050930531 | 0 | 0            | 0 | -0.10513472  | 0 | 0.033981458  | 0            |
| 0 | 0.077829165 | 0 | -0.004426908 | 0 | -0.034065003 | 0 | 0            | -0.066908934 |
| 0 | 0.030265609 | 0 | -0.022790816 | 0 | -0.050399842 | 0 | 0.075025213  | 0            |
| 0 | 0.051015466 | 0 | 0.006457519  | 0 | -0.11073384  | 0 | 0.03267596   | 0            |
| 0 | 0.049183135 | 0 | -0.000649411 | 0 | -0.1076017   | 0 | 0.032562012  | 0            |
| 0 | 0           | 0 | -0.00579925  | 0 | -0.090620099 | 0 | 0.076582758  | 0.006551687  |
| 0 | 0           | 0 | -0.007376965 | 0 | -0.088706379 | 0 | 0.076793409  | 0            |
| 0 | 0.042403129 | 0 | 0.004962556  | 0 | -0.11219048  | 0 | 0.037996057  | -0.023867161 |
| 0 | 0.041551626 | 0 | 0            | 0 | -0.10914947  | 0 | 0.037103455  | -0.023798569 |
| 0 | 0.040376846 | 0 | 0.000527621  | 0 | -0.11167686  | 0 | 0.036148524  | -0.022370445 |
| 0 | 0.041498328 | 0 | 0.006413902  | 0 | -0.1149191   | 0 | 0.035546455  | -0.024909955 |
| 0 | 0.083331065 | 0 | -0.029996267 | 0 | -0.000748714 | 0 | 0            | 0            |
| 0 | 0           | 0 | -0.071991323 | 0 | 0            | 0 | 0.076274498  | 0            |
| 0 | 0.028167259 | 0 | 0.004706799  | 0 | -0.11784446  | 0 | 0.041989177  | 0            |
| 0 | 0           | 0 | -0.070935779 | 0 | 0            | 0 | 0.076183952  | -0.007288056 |
| 0 | 0.059521922 | 0 | -0.000479998 | 0 | -0.086605387 | 0 | 0            | 0            |
| 0 | 0.063525282 | 0 | -0.051449346 | 0 | 0            | 0 | -0.018364668 | 0.97027584   |
| 0 | 0.032847377 | 0 | -0.017650857 | 0 | -0.055638574 | 0 | 0            | 0            |
| 0 | 0           | 0 | -0.036268316 | 0 | -0.057209868 | 0 | 0.076203395  | 0            |
| 0 | 0           | 0 | -0.033534573 | 0 | -0.060118255 | 0 | 0.076057908  | 0.001353828  |
| 0 | 0.093747779 | 0 | 0            | 0 | 0            | 0 | -0.029804011 | 0.96574396   |
| 0 | 0.050588577 | 0 | -0.001198043 | 0 | -0.088610179 | 0 | 0            | -0.034286005 |
| 0 | 0.072012216 | 0 | -0.027824582 | 0 | -0.010940031 | 0 | 0            | -0.065703915 |
| 0 | 0           | 0 | -0.003995092 | 0 | -0.12478172  | 0 | 0.046274819  | 0.013357389  |
| 0 | 0           | 0 | -0.005805533 | 0 | -0.12389212  | 0 | 0.045422335  | 0            |
| 0 | 0           | 0 | -0.079931393 | 0 | 0            | 0 | -0.013940657 | 1.0228897    |
| 0 | 0.047746861 | 0 | 0.004143265  | 0 | -0.10334987  | 0 | 0.033077421  | 0            |
| 0 | 0           | 0 | -0.031662915 | 0 | -0.063437295 | 0 | 0            | 0            |
| 0 | 0           | 0 | -0.028757787 | 0 | -0.066514421 | 0 | 0            | 0.003045584  |
| 0 | 0.038349989 | 0 | 0.003963337  | 0 | -0.10730445  | 0 | 0.03618552   | -0.019867281 |
| 0 | 0.076625057 | 0 | -0.052560176 | 0 | 0            | 0 | -0.01399988  | 0            |
| 0 | 0.067921495 | 0 | -0.05493797  | 0 | 0            | 0 | -0.01243171  | -0.053316285 |

|   |             |   |              |   |              |   |              |   |              |
|---|-------------|---|--------------|---|--------------|---|--------------|---|--------------|
| 0 | 0.067275164 | 0 | -0.041072566 | 0 | 0.075520368  | 0 | 0.038212774  | 0 | 0.86848397   |
| 0 | 0.069525364 | 0 | -0.020699859 | 0 | 0.059717002  | 0 | 0.036255987  | 0 | 0.86739269   |
| 0 | 0.067621444 | 0 | -0.038489183 | 0 | 0.073317062  | 0 | 0            | 0 | 0.89916434   |
| 0 | 0.068476301 | 0 | 0            | 0 | 0.039804646  | 0 | 0.034588805  | 0 | 0.8745768    |
| 0 | 0.042396234 | 0 | -0.003354249 | 0 | 0            | 0 | 0.034519008  | 0 | 0.89859677   |
| 0 | 0           | 0 | -0.042636336 | 0 | 0.029984258  | 0 | 0.037038716  | 0 | 0.93189438   |
| 0 | 0.078604721 | 0 | -0.043826244 | 0 | 0.085701352  | 0 | 0.047197219  | 0 | 0            |
| 0 | 0.068126832 | 0 | -0.041752817 | 0 | 0.075920709  | 0 | 0.048057885  | 0 | -0.061105155 |
| 0 | 0.013067436 | 0 | 0.014018941  | 0 | -0.05789746  | 0 | -0.034164302 | 0 | 1.0143349    |
| 0 | 0.073898934 | 0 | -0.028573693 | 0 | -0.020367135 | 0 | 0.066223248  | 0 | 0.86611661   |
| 0 | 0.079725156 | 0 | -0.037494787 | 0 | 0            | 0 | 0.065180288  | 0 | 0.85561801   |
| 0 | 0.080082938 | 0 | -0.037532283 | 0 | 0            | 0 | 0.065764472  | 0 | 0.85741257   |
| 0 | 0.074754066 | 0 | 0            | 0 | -0.045758174 | 0 | 0.064255035  | 0 | 0.87145463   |
| 0 | 0.07518293  | 0 | 0            | 0 | -0.045673011 | 0 | 0.064877839  | 0 | 0.8732904    |
| 0 | 0.07629903  | 0 | -0.006660624 | 0 | -0.037074557 | 0 | 0.065011574  | 0 | 0.86786588   |
| 0 | 0.07650357  | 0 | 0            | 0 | -0.043247872 | 0 | 0.064410131  | 0 | 0.86960099   |
| 0 | 0.076754134 | 0 | -0.006188481 | 0 | -0.037443155 | 0 | 0.065810725  | 0 | 0.8702111    |
| 0 | 0.089681444 | 0 | -0.018519226 | 0 | 0            | 0 | 0.064252224  | 0 | 0.85131221   |
| 0 | 0.098263458 | 0 | 0            | 0 | 0            | 0 | 0.061885554  | 0 | 0.84860914   |
| 0 | 0.074764263 | 0 | -0.036041795 | 0 | 0            | 0 | 0.064041051  | 0 | 0.86092916   |
| 0 | 0.07078719  | 0 | -0.030204208 | 0 | -0.013676616 | 0 | 0.065224943  | 0 | 0.86927835   |
| 0 | 0.074054923 | 0 | -0.025419651 | 0 | -0.018833142 | 0 | 0            | 0 | 0.92579299   |
| 0 | 0.079857647 | 0 | -0.033667255 | 0 | 0            | 0 | 0            | 0 | 0.91722722   |
| 0 | 0.074564525 | 0 | -0.025650864 | 0 | -0.018592675 | 0 | 0            | 0 | 0.92978864   |
| 0 | 0.071675705 | 0 | 0            | 0 | -0.040431094 | 0 | 0.062972648  | 0 | 0.87450162   |
| 0 | 0.07531562  | 0 | 0            | 0 | -0.041284123 | 0 | 0            | 0 | 0.93074345   |
| 0 | 0.073103286 | 0 | -0.009165478 | 0 | -0.029764182 | 0 | 0.063853871  | 0 | 0.87029288   |
| 0 | 0.076868446 | 0 | -0.004068347 | 0 | -0.034988135 | 0 | 0            | 0 | 0.92855559   |
| 0 | 0           | 0 | -0.030863136 | 0 | -0.068591658 | 0 | 0.065507397  | 0 | 0.93866312   |
| 0 | 0           | 0 | -0.031013847 | 0 | -0.068725482 | 0 | 0.066184952  | 0 | 0.94073552   |
| 0 | 0           | 0 | 0            | 0 | -0.096959129 | 0 | 0.064130468  | 0 | 0.94772209   |
| 0 | 0.04411831  | 0 | 0.003588719  | 0 | -0.10584576  | 0 | 0.028994157  | 0 | 0.94850267   |
| 0 | 0.043528114 | 0 | 0            | 0 | -0.10364228  | 0 | 0.028272804  | 0 | 0.94899463   |
| 0 | 0.042786825 | 0 | 0.000630918  | 0 | -0.10551661  | 0 | 0.027656849  | 0 | 0.95057519   |
| 0 | 0.043338499 | 0 | 0.004888424  | 0 | -0.10825883  | 0 | 0.026785235  | 0 | 0.94866321   |
| 0 | 0           | 0 | -0.005020457 | 0 | -0.090581867 | 0 | 0.064955512  | 0 | 0.94617687   |
| 0 | 0.050375867 | 0 | -0.001063655 | 0 | -0.087891673 | 0 | 0            | 0 | 0.96555055   |
| 0 | 0.071096617 | 0 | -0.026997515 | 0 | -0.012203995 | 0 | 0            | 0 | 0.92707812   |
| 0 | 0           | 0 | -0.069847069 | 0 | 0            | 0 | 0.0646104    | 0 | 0.92840075   |
| 0 | 0           | 0 | -0.005715166 | 0 | -0.11899259  | 0 | 0.037668223  | 0 | 0.98011916   |
| 0 | 0           | 0 | -0.032211601 | 0 | -0.060526693 | 0 | 0.064445844  | 0 | 0.93815745   |
| 0 | 0.088298848 | 0 | -0.035832386 | 0 | 0            | 0 | 0.075606836  | 0 | 0            |
| 0 | 0.085195902 | 0 | -0.031656642 | 0 | -0.00979046  | 0 | 0.076040954  | 0 | 0            |
| 0 | 0.085665409 | 0 | -0.031873808 | 0 | -0.009547445 | 0 | 0.076868851  | 0 | 0            |
| 0 | 0           | 0 | -0.027850962 | 0 | -0.06728398  | 0 | 0            | 0 | 1.0005402    |
| 0 | 0.086693887 | 0 | 0            | 0 | -0.037770581 | 0 | 0.074625065  | 0 | 0            |
| 0 | 0.040077818 | 0 | 0.002598081  | 0 | -0.10096642  | 0 | 0.0271542    | 0 | 0.95317191   |

|   |             |   |              |   |              |   |              |   |              |
|---|-------------|---|--------------|---|--------------|---|--------------|---|--------------|
| 0 | 0.088161139 | 0 | -0.008827437 | 0 | -0.027085469 | 0 | 0.075465175  | 0 | 0            |
| 0 | 0.074697895 | 0 | -0.029639611 | 0 | -0.019278514 | 0 | 0.076915346  | 0 | -0.069689667 |
| 0 | 0.075117952 | 0 | -0.02979462  | 0 | -0.019046024 | 0 | 0.077518705  | 0 | -0.068082981 |
| 0 | 0.080564195 | 0 | -0.03811099  | 0 | 0            | 0 | 0.076468775  | 0 | -0.077201373 |
| 0 | 0.076014005 | 0 | 0            | 0 | -0.04553371  | 0 | 0.075532134  | 0 | -0.065077302 |
| 0 | 0.077548086 | 0 | -0.00723435  | 0 | -0.036300294 | 0 | 0.076342505  | 0 | -0.068079159 |
| 0 | 0.082128885 | 0 | -0.033239092 | 0 | -0.003004692 | 0 | 0.074841464  | 0 | 0            |
| 0 | 0.031744311 | 0 | -0.020849362 | 0 | -0.05817666  | 0 | 0.075901597  | 0 | 0            |
| 0 | 0.086853188 | 0 | -0.028413673 | 0 | -0.006806904 | 0 | 0            | 0 | 0            |
| 0 | 0.071608306 | 0 | -0.031200229 | 0 | -0.012603094 | 0 | 0.075705264  | 0 | -0.066853681 |
| 0 | 0.068225116 | 0 | -0.05281462  | 0 | 0            | 0 | -0.018902744 | 0 | 0.96691123   |
| 0 | 0           | 0 | -0.034859938 | 0 | -0.065239819 | 0 | 0.077113725  | 0 | 0            |
| 0 | 0           | 0 | -0.032123435 | 0 | -0.068155175 | 0 | 0.076946109  | 0 | 0.001503163  |
| 0 | 0.075458548 | 0 | -0.026182593 | 0 | -0.017094427 | 0 | 0            | 0 | -0.068808887 |
| 0 | 0.05190692  | 0 | 0.005257334  | 0 | -0.1083547   | 0 | 0.034701297  | 0 | 0            |
| 0 | 0.042496744 | 0 | 0.005070257  | 0 | -0.11224921  | 0 | 0.03778189   | 0 | -0.023900293 |
| 0 | 0.067333429 | 0 | -0.040515026 | 0 | 0.075315241  | 0 | 0.036530017  | 0 | 0.86382377   |
| 0 | 0.073907326 | 0 | -0.02834808  | 0 | -0.020206099 | 0 | 0.065368962  | 0 | 0.86396413   |
| 0 | 0.074320148 | 0 | -0.028496909 | 0 | -0.019975957 | 0 | 0.065948463  | 0 | 0.86561777   |
| 0 | 0.080037567 | 0 | -0.037240929 | 0 | 0            | 0 | 0.064926628  | 0 | 0.85535456   |
| 0 | 0.075173235 | 0 | 0            | 0 | -0.045305544 | 0 | 0.064005277  | 0 | 0.87100072   |
| 0 | 0.076689881 | 0 | -0.006478112 | 0 | -0.036819651 | 0 | 0.064782457  | 0 | 0.8674885    |
| 0 | 0.070808739 | 0 | -0.029911239 | 0 | -0.013535467 | 0 | 0.064166536  | 0 | 0.86656516   |
| 0 | 0.074554588 | 0 | -0.025348764 | 0 | -0.018379593 | 0 | 0            | 0 | 0.92497987   |
| 0 | 0           | 0 | -0.030839924 | 0 | -0.068511329 | 0 | 0.065352588  | 0 | 0.93860923   |
| 0 | 0.044217922 | 0 | 0.003702857  | 0 | -0.1059062   | 0 | 0.028791885  | 0 | 0.94849385   |
| 0 | 0.085626827 | 0 | -0.031580955 | 0 | -0.009391918 | 0 | 0.075769436  | 0 | 0            |
| 0 | 0.075115105 | 0 | -0.029568555 | 0 | -0.018895231 | 0 | 0.076663243  | 0 | -0.070032789 |
| 0 | 0.074316934 | 0 | -0.028278585 | 0 | -0.019829881 | 0 | 0.065122312  | 0 | 0.86353314   |

| SE | bsnp_rs6469674 | SE | bsnp_rs13269857 | SE | bsnp_rs3020106 | SE | bsnp_rs3020119 | SE |
|----|----------------|----|-----------------|----|----------------|----|----------------|----|
| 0  | 0              | 0  | 0               | 0  | 0              | 0  | 0              | 0  |
| 0  | 0              | 0  | 0               | 0  | 0              | 0  | 0              | 0  |
| 0  | 0              | 0  | 0               | 0  | 0              | 0  | 0              | 0  |
| 0  | 0              | 0  | 0               | 0  | -0.15175808    | 0  | 0              | 0  |
| 0  | 0              | 0  | -0.14912965     | 0  | 0              | 0  | 0              | 0  |
| 0  | 0              | 0  | 0               | 0  | 0              | 0  | 0              | 0  |
| 0  | 0              | 0  | 0               | 0  | 0              | 0  | 0              | 0  |
| 0  | 0              | 0  | 0               | 0  | 0              | 0  | 0              | 0  |
| 0  | 0              | 0  | 0               | 0  | -0.13281823    | 0  | 0              | 0  |
| 0  | 0              | 0  | -0.12750321     | 0  | 0              | 0  | 0              | 0  |
| 0  | 0              | 0  | 0               | 0  | 0              | 0  | 0.083398257    | 0  |
| 0  | 0              | 0  | 0               | 0  | -0.096384858   | 0  | 0              | 0  |
| 0  | 0              | 0  | -0.091910822    | 0  | 0              | 0  | 0              | 0  |
| 0  | 0              | 0  | 0               | 0  | -0.13419749    | 0  | 0              | 0  |
| 0  | 0              | 0  | -0.13013525     | 0  | 0              | 0  | 0              | 0  |
| 0  | 0              | 0  | 0               | 0  | -0.11425954    | 0  | 0              | 0  |
| 0  | 0              | 0  | 0               | 0  | 0              | 0  | 0              | 0  |
| 0  | 0              | 0  | -0.11113652     | 0  | 0              | 0  | 0              | 0  |
| 0  | 0              | 0  | 0               | 0  | -0.10930777    | 0  | 0              | 0  |
| 0  | 0              | 0  | 0               | 0  | 0              | 0  | 0              | 0  |
| 0  | 0              | 0  | -0.10579503     | 0  | 0              | 0  | 0              | 0  |
| 0  | 0              | 0  | 0               | 0  | 0              | 0  | -0.019944333   | 0  |
| 0  | 0              | 0  | 0               | 0  | 0              | 0  | 0              | 0  |
| 0  | 0              | 0  | 0               | 0  | 0              | 0  | 0              | 0  |
| 0  | 0.01087946     | 0  | 0               | 0  | 0              | 0  | 0              | 0  |
| 0  | 0              | 0  | 0               | 0  | 0              | 0  | 0              | 0  |
| 0  | 0              | 0  | 0               | 0  | 0              | 0  | 0              | 0  |
| 0  | 0              | 0  | 0               | 0  | -0.12747412    | 0  | 0.057205704    | 0  |
| 0  | 0              | 0  | -0.12408349     | 0  | 0              | 0  | 0.055759621    | 0  |
| 0  | 0              | 0  | 0               | 0  | -0.1640534     | 0  | 0              | 0  |
| 0  | 0              | 0  | 0               | 0  | 0              | 0  | 0              | 0  |
| 0  | 0              | 0  | -0.16041208     | 0  | 0              | 0  | 0              | 0  |
| 0  | 0              | 0  | 0               | 0  | 0              | 0  | 0              | 0  |
| 0  | 0              | 0  | 0               | 0  | 0              | 0  | 0              | 0  |
| 0  | 0.027534997    | 0  | 0               | 0  | 0              | 0  | 0              | 0  |
| 0  | 0              | 0  | 0               | 0  | 0              | 0  | 0              | 0  |
| 0  | 0              | 0  | 0               | 0  | 0              | 0  | 0.022808256    | 0  |
| 0  | 0              | 0  | 0               | 0  | 0              | 0  | 0              | 0  |
| 0  | 0              | 0  | 0               | 0  | 0              | 0  | 0              | 0  |
| 0  | 0.021286739    | 0  | 0               | 0  | 0              | 0  | 0              | 0  |
| 0  | 0              | 0  | 0               | 0  | 0              | 0  | 0              | 0  |
| 0  | 0              | 0  | 0               | 0  | 0              | 0  | 0              | 0  |
| 0  | 0              | 0  | 0               | 0  | 0              | 0  | 0              | 0  |
| 0  | 0              | 0  | -0.059704435    | 0  | -0.092859225   | 0  | 0              | 0  |
| 0  | 0              | 0  | 0               | 0  | -0.15053391    | 0  | 0              | 0  |

|   |             |   |              |   |              |   |              |   |
|---|-------------|---|--------------|---|--------------|---|--------------|---|
| 0 | 0.008855721 | 0 | 0            | 0 | -0.15107791  | 0 | 0            | 0 |
| 0 | 0           | 0 | -0.14791113  | 0 | 0            | 0 | 0            | 0 |
| 0 | 0.009194178 | 0 | -0.14844082  | 0 | 0            | 0 | 0            | 0 |
| 0 | 0           | 0 | 0            | 0 | 0            | 0 | 0            | 0 |
| 0 | 0           | 0 | 0            | 0 | 0            | 0 | 0            | 0 |
| 0 | 0           | 0 | 0            | 0 | 0            | 0 | 0.021757499  | 0 |
| 0 | 0           | 0 | 0            | 0 | 0            | 0 | 0.044227651  | 0 |
| 0 | 0           | 0 | 0            | 0 | 0            | 0 | 0            | 0 |
| 0 | 0           | 0 | 0            | 0 | 0            | 0 | 0.030550819  | 0 |
| 0 | 0.016723967 | 0 | 0            | 0 | 0            | 0 | 0            | 0 |
| 0 | 0           | 0 | 0            | 0 | 0            | 0 | 0            | 0 |
| 0 | 0           | 0 | 0            | 0 | 0            | 0 | 0            | 0 |
| 0 | 0.017405583 | 0 | 0            | 0 | 0            | 0 | 0            | 0 |
| 0 | 0           | 0 | 0            | 0 | 0            | 0 | 0            | 0 |
| 0 | 0           | 0 | 0            | 0 | 0            | 0 | 0            | 0 |
| 0 | 0.005066264 | 0 | 0            | 0 | 0            | 0 | 0            | 0 |
| 0 | 0           | 0 | 0            | 0 | -0.15465546  | 0 | 0            | 0 |
| 0 | 0           | 0 | 0            | 0 | -0.14147998  | 0 | 0            | 0 |
| 0 | 0           | 0 | 0            | 0 | -0.1387895   | 0 | 0            | 0 |
| 0 | 0           | 0 | 0            | 0 | -0.13612433  | 0 | -0.01121921  | 0 |
| 0 | 0           | 0 | 0            | 0 | -0.13187846  | 0 | 0            | 0 |
| 0 | 0.005578292 | 0 | 0            | 0 | -0.13240002  | 0 | 0            | 0 |
| 0 | 0           | 0 | 0.01747652   | 0 | -0.14998437  | 0 | 0            | 0 |
| 0 | 0           | 0 | 0            | 0 | -0.132607    | 0 | 0            | 0 |
| 0 | 0           | 0 | 0            | 0 | -0.13199069  | 0 | 0            | 0 |
| 0 | 0           | 0 | -0.14774168  | 0 | 0            | 0 | 0            | 0 |
| 0 | 0           | 0 | -0.13540844  | 0 | 0            | 0 | 0            | 0 |
| 0 | 0           | 0 | 0            | 0 | -0.10882831  | 0 | 0            | 0 |
| 0 | 0           | 0 | 0            | 0 | 0            | 0 | 0.087152898  | 0 |
| 0 | 0           | 0 | 0            | 0 | 0            | 0 | 0.090294727  | 0 |
| 0 | 0.047058334 | 0 | 0            | 0 | 0            | 0 | 0.086624631  | 0 |
| 0 | 0           | 0 | -0.13077858  | 0 | 0            | 0 | -0.010938813 | 0 |
| 0 | 0           | 0 | -0.12653326  | 0 | 0            | 0 | 0            | 0 |
| 0 | 0           | 0 | -0.1319034   | 0 | 0            | 0 | 0            | 0 |
| 0 | 0           | 0 | -0.12726087  | 0 | 0            | 0 | 0            | 0 |
| 0 | 0.006366219 | 0 | -0.12703874  | 0 | 0            | 0 | 0            | 0 |
| 0 | 0           | 0 | -0.12426538  | 0 | 0            | 0 | 0            | 0 |
| 0 | 0           | 0 | -0.10325414  | 0 | 0            | 0 | 0            | 0 |
| 0 | 0           | 0 | 0            | 0 | -0.10270629  | 0 | 0            | 0 |
| 0 | 0           | 0 | 0            | 0 | -0.10775842  | 0 | 0            | 0 |
| 0 | 0           | 0 | -0.098313426 | 0 | 0            | 0 | 0            | 0 |
| 0 | 0           | 0 | -0.10300117  | 0 | 0            | 0 | 0            | 0 |
| 0 | 0           | 0 | 0            | 0 | -0.095674141 | 0 | -0.015746754 | 0 |
| 0 | 0           | 0 | 0            | 0 | -0.096987951 | 0 | 0            | 0 |
| 0 | 0           | 0 | 0            | 0 | -0.0957737   | 0 | 0            | 0 |
| 0 | 0           | 0 | 0.023583038  | 0 | -0.11926349  | 0 | 0            | 0 |
| 0 | 0.002825576 | 0 | 0            | 0 | -0.096207742 | 0 | 0            | 0 |

|   |              |   |              |   |              |   |              |   |
|---|--------------|---|--------------|---|--------------|---|--------------|---|
| 0 | 0            | 0 | 0            | 0 | -0.14184516  | 0 | 0            | 0 |
| 0 | 0            | 0 | -0.09129339  | 0 | 0            | 0 | -0.016636108 | 0 |
| 0 | 0            | 0 | -0.092333382 | 0 | 0            | 0 | 0            | 0 |
| 0 | 0            | 0 | -0.091284819 | 0 | 0            | 0 | 0            | 0 |
| 0 | 0            | 0 | 0            | 0 | -0.1289493   | 0 | 0.016837418  | 0 |
| 0 | 0.003443691  | 0 | -0.091702114 | 0 | 0            | 0 | 0            | 0 |
| 0 | 0            | 0 | 0            | 0 | -0.12801227  | 0 | 0            | 0 |
| 0 | -0.008507442 | 0 | 0            | 0 | -0.13473162  | 0 | 0            | 0 |
| 0 | 0            | 0 | 0            | 0 | -0.13650406  | 0 | 0            | 0 |
| 0 | 0            | 0 | -0.011883794 | 0 | -0.12251269  | 0 | 0            | 0 |
| 0 | 0            | 0 | 0            | 0 | -0.13427474  | 0 | 0            | 0 |
| 0 | 0            | 0 | -0.13711237  | 0 | 0            | 0 | 0            | 0 |
| 0 | 0            | 0 | -0.12494213  | 0 | 0            | 0 | 0.015900652  | 0 |
| 0 | 0            | 0 | -0.12395175  | 0 | 0            | 0 | 0            | 0 |
| 0 | -0.007662865 | 0 | -0.13059211  | 0 | 0            | 0 | 0            | 0 |
| 0 | 0            | 0 | -0.13169826  | 0 | 0            | 0 | 0            | 0 |
| 0 | 0            | 0 | -0.13015987  | 0 | 0            | 0 | 0            | 0 |
| 0 | 0            | 0 | 0            | 0 | -0.12658608  | 0 | 0            | 0 |
| 0 | -0.97041856  | 0 | 0            | 0 | 0            | 0 | 0            | 0 |
| 0 | 0            | 0 | -0.12238485  | 0 | 0            | 0 | 0            | 0 |
| 0 | 0            | 0 | 0            | 0 | -0.1214567   | 0 | 0            | 0 |
| 0 | 0            | 0 | 0            | 0 | -0.14009283  | 0 | 0.065565036  | 0 |
| 0 | 0            | 0 | -0.1168662   | 0 | 0            | 0 | 0            | 0 |
| 0 | 0            | 0 | -0.13527108  | 0 | 0            | 0 | 0.063805778  | 0 |
| 0 | 0            | 0 | 0            | 0 | -0.10625583  | 0 | 0            | 0 |
| 0 | 0            | 0 | 0            | 0 | -0.11260057  | 0 | 0.024858455  | 0 |
| 0 | 0            | 0 | -0.10289063  | 0 | 0            | 0 | 0            | 0 |
| 0 | 0            | 0 | 0            | 0 | 0            | 0 | 0            | 0 |
| 0 | 0            | 0 | -0.10910271  | 0 | 0            | 0 | 0.023213228  | 0 |
| 0 | 0            | 0 | 0            | 0 | -0.11332447  | 0 | 0            | 0 |
| 0 | 0.006365656  | 0 | 0            | 0 | -0.11381349  | 0 | 0            | 0 |
| 0 | 0            | 0 | -0.016454241 | 0 | -0.098190929 | 0 | 0            | 0 |
| 0 | -0.037091127 | 0 | 0            | 0 | 0            | 0 | 0            | 0 |
| 0 | 0            | 0 | 0            | 0 | -0.11010339  | 0 | 0.024692649  | 0 |
| 0 | 0            | 0 | 0            | 0 | 0            | 0 | 0            | 0 |
| 0 | 0            | 0 | 0            | 0 | 0            | 0 | -0.012634993 | 0 |
| 0 | 0            | 0 | -0.11019584  | 0 | 0            | 0 | 0            | 0 |
| 0 | 0            | 0 | 0            | 0 | 0            | 0 | 0            | 0 |
| 0 | 0            | 0 | 0            | 0 | 0            | 0 | 0            | 0 |
| 0 | 0.006814301  | 0 | -0.11067054  | 0 | 0            | 0 | 0            | 0 |
| 0 | 0            | 0 | 0            | 0 | 0            | 0 | 0            | 0 |
| 0 | 0            | 0 | 0            | 0 | -0.10829966  | 0 | 0            | 0 |
| 0 | 0.0067354    | 0 | 0            | 0 | -0.10883705  | 0 | 0            | 0 |
| 0 | 0            | 0 | 0            | 0 | 0            | 0 | 0            | 0 |
| 0 | 0            | 0 | 0            | 0 | 0            | 0 | -0.017140039 | 0 |
| 0 | 0            | 0 | -0.000332855 | 0 | -0.10898513  | 0 | 0            | 0 |
| 0 | 0            | 0 | -0.10627875  | 0 | 0            | 0 | 0.023573326  | 0 |



|   |              |   |              |   |             |              |   |
|---|--------------|---|--------------|---|-------------|--------------|---|
| 0 | 0            | 0 | 0            | 0 | 0           | 0            | 0 |
| 0 | 0.009919477  | 0 | 0            | 0 | 0           | 0            | 0 |
| 0 | 0            | 0 | 0            | 0 | 0           | 0            | 0 |
| 0 | 0            | 0 | 0            | 0 | 0           | 0            | 0 |
| 0 | 0            | 0 | -0.10477428  | 0 | 0           | 0            | 0 |
| 0 | 0            | 0 | 0            | 0 | 0           | -0.019647571 | 0 |
| 0 | 0            | 0 | 0            | 0 | 0           | 0            | 0 |
| 0 | 0.007265764  | 0 | -0.10529913  | 0 | 0           | 0            | 0 |
| 0 | 0            | 0 | 0            | 0 | 0           | -0.016992322 | 0 |
| 0 | 0            | 0 | 0            | 0 | 0           | 0            | 0 |
| 0 | 0            | 0 | 0            | 0 | 0           | -0.019443953 | 0 |
| 0 | 0            | 0 | 0            | 0 | 0           | -0.019980771 | 0 |
| 0 | 0.00459842   | 0 | 0            | 0 | 0           | -0.018832121 | 0 |
| 0 | 0.008886854  | 0 | 0            | 0 | 0           | 0            | 0 |
| 0 | 0            | 0 | 0            | 0 | 0           | 0            | 0 |
| 0 | 0            | 0 | 0            | 0 | 0           | 0            | 0 |
| 0 | 0            | 0 | 0            | 0 | 0           | 0            | 0 |
| 0 | 0            | 0 | 0            | 0 | -0.12366536 | 0.060276007  | 0 |
| 0 | 0.010730275  | 0 | 0            | 0 | 0           | 0            | 0 |
| 0 | 0.011457172  | 0 | 0            | 0 | 0           | 0            | 0 |
| 0 | 0            | 0 | 0            | 0 | 0           | 0            | 0 |
| 0 | 0.025542515  | 0 | 0            | 0 | -0.124511   | 0.059563402  | 0 |
| 0 | 0            | 0 | -0.12021084  | 0 | 0           | 0.058918408  | 0 |
| 0 | 0            | 0 | -0.01371493  | 0 | -0.11407293 | 0.056904099  | 0 |
| 0 | -0.97398426  | 0 | 0            | 0 | 0           | 0            | 0 |
| 0 | 0.02566881   | 0 | -0.12106604  | 0 | 0           | 0.05818981   | 0 |
| 0 | -0.95577214  | 0 | 0            | 0 | 0           | 0            | 0 |
| 0 | -1.0249676   | 0 | 0            | 0 | -0.15209347 | 0            | 0 |
| 0 | -1.0246604   | 0 | -0.14945309  | 0 | 0           | 0            | 0 |
| 0 | -0.07377568  | 0 | 0            | 0 | -0.17991155 | 0            | 0 |
| 0 | 0            | 0 | 0            | 0 | -0.17685021 | 0            | 0 |
| 0 | -0.069084995 | 0 | -0.17461492  | 0 | 0           | 0            | 0 |
| 0 | -1.0708433   | 0 | 0            | 0 | 0           | 0            | 0 |
| 0 | 0            | 0 | -0.17170161  | 0 | 0           | 0            | 0 |
| 0 | 0            | 0 | -0.056922441 | 0 | -0.107859   | 0            | 0 |
| 0 | 0            | 0 | 0            | 0 | 0           | 0            | 0 |
| 0 | 0            | 0 | 0            | 0 | 0           | 0            | 0 |
| 0 | 0            | 0 | 0            | 0 | 0           | 0            | 0 |
| 0 | 0.01869732   | 0 | 0            | 0 | 0           | 0            | 0 |
| 0 | 0            | 0 | 0            | 0 | 0           | 0            | 0 |
| 0 | 0            | 0 | 0            | 0 | 0           | 0            | 0 |
| 0 | 0            | 0 | 0            | 0 | 0           | 0.009879822  | 0 |
| 0 | 0.01854647   | 0 | 0            | 0 | 0           | 0            | 0 |
| 0 | 0            | 0 | 0            | 0 | 0           | 0            | 0 |
| 0 | 0            | 0 | 0            | 0 | 0           | 0            | 0 |
| 0 | 0            | 0 | 0            | 0 | 0           | 0.008184858  | 0 |
| 0 | 0            | 0 | 0            | 0 | 0           | 0            | 0 |

|   |              |   |              |   |              |             |   |
|---|--------------|---|--------------|---|--------------|-------------|---|
| 0 | -0.97661007  | 0 | 0            | 0 | 0            | 0           | 0 |
| 0 | 0            | 0 | 0            | 0 | 0            | 0.02799195  | 0 |
| 0 | 0.030422293  | 0 | 0            | 0 | 0            | 0           | 0 |
| 0 | 0            | 0 | 0            | 0 | 0            | 0           | 0 |
| 0 | 0.028401497  | 0 | 0            | 0 | 0            | 0.026899016 | 0 |
| 0 | 0            | 0 | 0            | 0 | 0            | 0           | 0 |
| 0 | 0            | 0 | 0            | 0 | 0            | 0           | 0 |
| 0 | 0            | 0 | 0            | 0 | 0            | 0.023367561 | 0 |
| 0 | 0            | 0 | 0            | 0 | 0            | 0           | 0 |
| 0 | 0            | 0 | 0            | 0 | 0            | 0.015475816 | 0 |
| 0 | 0            | 0 | 0            | 0 | 0            | 0           | 0 |
| 0 | 0            | 0 | 0            | 0 | 0            | 0.026171528 | 0 |
| 0 | 0.041333502  | 0 | 0            | 0 | 0            | 0           | 0 |
| 0 | 0.008732406  | 0 | 0            | 0 | 0            | 0           | 0 |
| 0 | 0            | 0 | 0            | 0 | 0            | 0           | 0 |
| 0 | 0.019267537  | 0 | 0            | 0 | 0            | 0           | 0 |
| 0 | 0            | 0 | 0            | 0 | 0            | 0           | 0 |
| 0 | 0            | 0 | 0            | 0 | 0            | 0           | 0 |
| 0 | 0            | 0 | -0.05940938  | 0 | -0.091933111 | 0           | 0 |
| 0 | 0.015758355  | 0 | 0            | 0 | 0            | 0           | 0 |
| 0 | 0            | 0 | 0            | 0 | 0            | 0.010738421 | 0 |
| 0 | 0.008761333  | 0 | -0.059537736 | 0 | -0.092350804 | 0           | 0 |
| 0 | 0            | 0 | 0            | 0 | 0            | 0.029278122 | 0 |
| 0 | -0.95773572  | 0 | 0            | 0 | 0            | 0           | 0 |
| 0 | 0            | 0 | 0            | 0 | 0            | 0.037800966 | 0 |
| 0 | 0            | 0 | 0            | 0 | 0            | 0.029670256 | 0 |
| 0 | -0.020798241 | 0 | 0            | 0 | 0            | 0           | 0 |
| 0 | 0            | 0 | 0            | 0 | 0            | 0.027996586 | 0 |
| 0 | 0            | 0 | 0            | 0 | 0            | 0           | 0 |
| 0 | 0            | 0 | 0            | 0 | 0            | 0.048919919 | 0 |
| 0 | 0            | 0 | 0            | 0 | 0            | 0.036357636 | 0 |
| 0 | 0.024781927  | 0 | 0            | 0 | 0            | 0.026514347 | 0 |
| 0 | 0            | 0 | 0            | 0 | 0            | 0           | 0 |
| 0 | 0            | 0 | 0            | 0 | 0            | 0           | 0 |
| 0 | 0.022348979  | 0 | 0            | 0 | 0            | 0.047709981 | 0 |
| 0 | 0.027774181  | 0 | 0            | 0 | 0            | 0.03510139  | 0 |
| 0 | 0.010785336  | 0 | 0            | 0 | 0            | 0           | 0 |
| 0 | 0            | 0 | 0            | 0 | 0            | 0.04849978  | 0 |
| 0 | -0.017916757 | 0 | 0            | 0 | 0            | 0           | 0 |
| 0 | 0            | 0 | 0            | 0 | 0            | 0           | 0 |
| 0 | -1.0028238   | 0 | 0            | 0 | -0.13351358  | 0           | 0 |
| 0 | -0.98636856  | 0 | 0            | 0 | 0            | 0.087462078 | 0 |
| 0 | -1.001865    | 0 | -0.12817528  | 0 | 0            | 0           | 0 |
| 0 | 0            | 0 | 0            | 0 | 0            | 0           | 0 |
| 0 | 0.022975449  | 0 | 0            | 0 | 0            | 0           | 0 |
| 0 | -0.094925353 | 0 | 0            | 0 | -0.12703386  | 0           | 0 |
| 0 | 0            | 0 | 0            | 0 | -0.1407472   | 0           | 0 |

|   |              |   |              |   |              |   |              |   |
|---|--------------|---|--------------|---|--------------|---|--------------|---|
| 0 | 0            | 0 | 0            | 0 | -0.15734638  | 0 | 0            | 0 |
| 0 | -0.049039062 | 0 | 0            | 0 | -0.15255626  | 0 | 0            | 0 |
| 0 | 0            | 0 | 0            | 0 | -0.12433923  | 0 | 0            | 0 |
| 0 | 0            | 0 | 0            | 0 | -0.14931522  | 0 | 0            | 0 |
| 0 | 0            | 0 | 0            | 0 | -0.11499866  | 0 | 0            | 0 |
| 0 | -1.0040502   | 0 | 0            | 0 | -0.097664703 | 0 | 0            | 0 |
| 0 | 0            | 0 | 0            | 0 | -0.15371266  | 0 | 0            | 0 |
| 0 | -0.089016847 | 0 | -0.11945506  | 0 | 0            | 0 | 0            | 0 |
| 0 | 0            | 0 | 0            | 0 | -0.1315677   | 0 | 0            | 0 |
| 0 | 0.005812951  | 0 | 0            | 0 | -0.15423562  | 0 | 0            | 0 |
| 0 | 0            | 0 | 0            | 0 | -0.15445755  | 0 | 0            | 0 |
| 0 | 0            | 0 | 0            | 0 | -0.15511154  | 0 | 0            | 0 |
| 0 | 0            | 0 | 0.005338666  | 0 | -0.15983964  | 0 | 0            | 0 |
| 0 | 0            | 0 | 0            | 0 | -0.15461796  | 0 | 0.000565252  | 0 |
| 0 | 0            | 0 | 0            | 0 | -0.14384667  | 0 | 0            | 0 |
| 0 | 0            | 0 | 0.016764638  | 0 | -0.1579418   | 0 | 0            | 0 |
| 0 | 0            | 0 | 0            | 0 | -0.14168393  | 0 | 0            | 0 |
| 0 | 0            | 0 | 0            | 0 | -0.14151598  | 0 | -0.000182699 | 0 |
| 0 | 0            | 0 | -0.13298444  | 0 | 0            | 0 | 0            | 0 |
| 0 | -1.0029154   | 0 | -0.093196549 | 0 | 0            | 0 | 0            | 0 |
| 0 | 0            | 0 | -0.11690793  | 0 | 0            | 0 | 0            | 0 |
| 0 | 0            | 0 | -0.10949653  | 0 | 0            | 0 | 0            | 0 |
| 0 | 0            | 0 | -0.15005524  | 0 | 0            | 0 | 0            | 0 |
| 0 | -0.043444821 | 0 | -0.1449176   | 0 | 0            | 0 | 0            | 0 |
| 0 | 0            | 0 | 0            | 0 | -0.14116272  | 0 | 0            | 0 |
| 0 | 0            | 0 | 0            | 0 | -0.13788571  | 0 | 0            | 0 |
| 0 | 0            | 0 | 0            | 0 | -0.11545472  | 0 | 0            | 0 |
| 0 | 0            | 0 | 0            | 0 | -0.13345919  | 0 | 0            | 0 |
| 0 | 0            | 0 | 0            | 0 | -0.14014213  | 0 | -0.008360409 | 0 |
| 0 | -1.0056613   | 0 | 0            | 0 | -0.13591094  | 0 | 0            | 0 |
| 0 | 0            | 0 | 0            | 0 | -0.13488294  | 0 | -0.009473024 | 0 |
| 0 | 0.005748378  | 0 | 0            | 0 | -0.13837998  | 0 | 0            | 0 |
| 0 | 0            | 0 | 0.016765567  | 0 | -0.15523597  | 0 | 0            | 0 |
| 0 | 0            | 0 | 0            | 0 | -0.13116646  | 0 | -0.014547811 | 0 |
| 0 | 0            | 0 | 0            | 0 | -0.11368352  | 0 | 0            | 0 |
| 0 | 0            | 0 | 0.01431156   | 0 | -0.15012537  | 0 | -0.01102717  | 0 |
| 0 | 0            | 0 | 0            | 0 | -0.13590215  | 0 | -0.011032674 | 0 |
| 0 | 0.002307809  | 0 | 0            | 0 | -0.13583255  | 0 | -0.010815294 | 0 |
| 0 | 0            | 0 | 0.017600796  | 0 | -0.14916606  | 0 | 0            | 0 |
| 0 | 0            | 0 | -0.1235122   | 0 | 0            | 0 | 0            | 0 |
| 0 | 0            | 0 | 0            | 0 | -0.13181021  | 0 | 0            | 0 |
| 0 | 0            | 0 | 0            | 0 | -0.13144912  | 0 | 0            | 0 |
| 0 | 0            | 0 | -0.14178867  | 0 | 0            | 0 | 0            | 0 |
| 0 | 0            | 0 | -0.1467704   | 0 | 0            | 0 | 0            | 0 |
| 0 | 0.005593817  | 0 | 0.017537631  | 0 | -0.149625    | 0 | 0            | 0 |
| 0 | 0            | 0 | 0.016903853  | 0 | -0.14921847  | 0 | 0            | 0 |
| 0 | 0.004849605  | 0 | 0            | 0 | -0.13228655  | 0 | 0            | 0 |

|   |              |   |              |             |             |   |              |
|---|--------------|---|--------------|-------------|-------------|---|--------------|
| 0 | 0.00552286   | 0 | 0            | -0.13174639 | 0           | 0 | 0            |
| 0 | 0            | 0 | 0.018042129  | 0           | -0.14943829 | 0 | 0            |
| 0 | 0            | 0 | 0            | 0           | -0.13147453 | 0 | 0            |
| 0 | 0.006623204  | 0 | -0.14727913  | 0           | 0           | 0 | 0            |
| 0 | 0            | 0 | 0            | 0           | 0           | 0 | 0.08969139   |
| 0 | 0            | 0 | -0.14746685  | 0           | 0           | 0 | 0            |
| 0 | 0            | 0 | -0.14752086  | 0           | 0           | 0 | 0            |
| 0 | 0            | 0 | -0.14775273  | 0           | 0           | 0 | -0.000147802 |
| 0 | 0            | 0 | -0.1365641   | 0           | 0           | 0 | 0            |
| 0 | 0            | 0 | -0.13552643  | 0           | 0           | 0 | -0.000572512 |
| 0 | 0            | 0 | -0.13541222  | 0           | 0           | 0 | 0            |
| 0 | 0            | 0 | 0            | 0           | -0.10928368 | 0 | 0            |
| 0 | 0            | 0 | 0            | 0           | -0.11726044 | 0 | 0            |
| 0 | 0            | 0 | 0.028123622  | 0           | -0.13613839 | 0 | 0            |
| 0 | 0            | 0 | 0            | 0           | -0.10854922 | 0 | -0.003036995 |
| 0 | 0.021697138  | 0 | 0            | 0           | 0           | 0 | 0.08991261   |
| 0 | -1.0050155   | 0 | -0.13179487  | 0           | 0           | 0 | 0            |
| 0 | 0            | 0 | -0.11078785  | 0           | 0           | 0 | 0            |
| 0 | 0            | 0 | -0.10809849  | 0           | 0           | 0 | 0            |
| 0 | 0            | 0 | -0.13432085  | 0           | 0           | 0 | 0            |
| 0 | 0            | 0 | -0.12354721  | 0           | 0           | 0 | -0.015801918 |
| 0 | 0            | 0 | -0.13097915  | 0           | 0           | 0 | 0            |
| 0 | 0            | 0 | -0.12533253  | 0           | 0           | 0 | 0            |
| 0 | 0            | 0 | -0.12943039  | 0           | 0           | 0 | -0.009019917 |
| 0 | 0            | 0 | -0.1334401   | 0           | 0           | 0 | -0.008967367 |
| 0 | 0            | 0 | -0.13048654  | 0           | 0           | 0 | -0.010662488 |
| 0 | 0.003229784  | 0 | -0.13037176  | 0           | 0           | 0 | -0.010368273 |
| 0 | 0            | 0 | -0.12373319  | 0           | 0           | 0 | 0            |
| 0 | 0.006516065  | 0 | -0.13145468  | 0           | 0           | 0 | 0            |
| 0 | 0            | 0 | -0.12644127  | 0           | 0           | 0 | 0            |
| 0 | 0            | 0 | -0.12360233  | 0           | 0           | 0 | 0            |
| 0 | 0.005287604  | 0 | -0.12691357  | 0           | 0           | 0 | 0            |
| 0 | 0.006100975  | 0 | -0.12401074  | 0           | 0           | 0 | 0            |
| 0 | 0            | 0 | -0.10355051  | 0           | 0           | 0 | 0            |
| 0 | 0            | 0 | -0.1028837   | 0           | 0           | 0 | -0.004587277 |
| 0 | 0            | 0 | -0.11141726  | 0           | 0           | 0 | 0            |
| 0 | 0            | 0 | 0            | 0           | -0.10203345 | 0 | -0.011324472 |
| 0 | 0            | 0 | 0            | 0           | -0.10318522 | 0 | 0            |
| 0 | 0            | 0 | 0            | 0           | -0.10219995 | 0 | 0            |
| 0 | 0            | 0 | 0.018232466  | 0           | -0.12037649 | 0 | 0            |
| 0 | 0.000904027  | 0 | 0            | 0           | -0.10264574 | 0 | 0            |
| 0 | 0            | 0 | 0            | 0           | -0.10698425 | 0 | -0.014445271 |
| 0 | 0            | 0 | 0.01748691   | 0           | -0.12468271 | 0 | 0            |
| 0 | -0.003812184 | 0 | 0            | 0           | -0.1081137  | 0 | 0            |
| 0 | 0            | 0 | 0            | 0           | -0.10743408 | 0 | 0            |
| 0 | 0            | 0 | -0.097679418 | 0           | 0           | 0 | -0.012298333 |
| 0 | 0            | 0 | -0.098629042 | 0           | 0           | 0 | 0            |

|   |              |   |              |   |              |            |              |
|---|--------------|---|--------------|---|--------------|------------|--------------|
| 0 | 0            | 0 | -0.097781563 | 0 | 0            | 0          | 0            |
| 0 | -0.066113705 | 0 | 0            | 0 | -0.15636102  | 0          | 0            |
| 0 | 0.001543176  | 0 | -0.098213139 | 0 | 0            | 0          | 0            |
| 0 | 0            | 0 | -0.10230508  | 0 | 0            | -0.0154535 | 0            |
| 0 | 0            | 0 | -0.10261656  | 0 | 0            | 0          | 0            |
| 0 | -0.002976227 | 0 | -0.10327161  | 0 | 0            | 0          | 0            |
| 0 | 0            | 0 | 0            | 0 | -0.13623081  | 0          | 0.028224016  |
| 0 | 0            | 0 | 0            | 0 | -0.15326284  | 0          | 0            |
| 0 | 0            | 0 | 0            | 0 | -0.096262168 | 0          | -0.014866778 |
| 0 | 0            | 0 | 0.021878652  | 0 | -0.11690551  | 0          | -0.015607706 |
| 0 | 0            | 0 | 0            | 0 | -0.095414897 | 0          | -0.014498287 |
| 0 | -0.002603228 | 0 | 0            | 0 | -0.095809548 | 0          | -0.016370525 |
| 0 | 0            | 0 | 0            | 0 | -0.096386507 | 0          | 0            |
| 0 | 0            | 0 | 0.025566316  | 0 | -0.12180163  | 0          | 0            |
| 0 | 0.002538381  | 0 | 0            | 0 | -0.096826793 | 0          | 0            |
| 0 | 0            | 0 | 0.023550159  | 0 | -0.11862075  | 0          | 0            |
| 0 | 0            | 0 | 0            | 0 | -0.13292665  | 0          | 0            |
| 0 | 0.002821819  | 0 | 0.023577635  | 0 | -0.11908135  | 0          | 0            |
| 0 | -0.060919342 | 0 | -0.1499641   | 0 | 0            | 0          | 0            |
| 0 | 0            | 0 | 0            | 0 | -0.13936581  | 0          | 0            |
| 0 | 0            | 0 | -0.012668943 | 0 | -0.12939366  | 0          | 0            |
| 0 | 0            | 0 | -0.13130696  | 0 | 0            | 0          | 0.026586084  |
| 0 | 0            | 0 | -0.091700148 | 0 | 0            | 0          | -0.015859519 |
| 0 | 0            | 0 | -0.091018554 | 0 | 0            | 0          | -0.015305993 |
| 0 | 0            | 0 | -0.14700099  | 0 | 0            | 0          | 0            |
| 0 | -0.00226477  | 0 | -0.091410501 | 0 | 0            | 0          | -0.017179621 |
| 0 | 0            | 0 | 0            | 0 | -0.13471441  | 0          | 0.022028011  |
| 0 | 0            | 0 | -0.091715977 | 0 | 0            | 0          | 0            |
| 0 | 0.003195323  | 0 | -0.092137838 | 0 | 0            | 0          | 0            |
| 0 | 0            | 0 | 0            | 0 | -0.12825528  | 0          | 0.017907105  |
| 0 | 0            | 0 | 0            | 0 | -0.12805243  | 0          | 0.015771098  |
| 0 | -0.001982653 | 0 | 0            | 0 | -0.12918546  | 0          | 0.016478742  |
| 0 | 0            | 0 | -0.003414975 | 0 | -0.12561187  | 0          | 0.016772032  |
| 0 | -0.087368827 | 0 | 0            | 0 | -0.14388858  | 0          | 0            |
| 0 | 0            | 0 | 0            | 0 | -0.13125922  | 0          | 0            |
| 0 | 0            | 0 | -0.12822174  | 0 | 0            | 0          | 0            |
| 0 | -0.007249171 | 0 | 0            | 0 | -0.12872119  | 0          | 0            |
| 0 | 0            | 0 | -0.005548225 | 0 | -0.12263598  | 0          | 0            |
| 0 | 0            | 0 | 0            | 0 | -0.12799844  | 0          | 0            |
| 0 | -0.009445471 | 0 | 0            | 0 | -0.13757389  | 0          | 0            |
| 0 | -0.008488421 | 0 | -0.011717825 | 0 | -0.12320881  | 0          | 0            |
| 0 | 0            | 0 | -0.013021134 | 0 | -0.1237778   | 0          | 0            |
| 0 | 0            | 0 | 0            | 0 | -0.13673681  | 0          | 0            |
| 0 | 0            | 0 | -0.011858104 | 0 | -0.12261395  | 0          | 0            |
| 0 | 0            | 0 | -0.13422423  | 0 | 0            | 0          | 0            |
| 0 | -1.0144317   | 0 | 0            | 0 | -0.11508236  | 0          | 0            |
| 0 | 0            | 0 | -0.12962302  | 0 | 0            | 0          | 0.020175938  |

|   |              |   |              |   |             |   |              |   |
|---|--------------|---|--------------|---|-------------|---|--------------|---|
| 0 | -1.0765691   | 0 | 0            | 0 | -0.10864259 | 0 | 0            | 0 |
| 0 | 0            | 0 | 0            | 0 | -0.14108643 | 0 | 0            | 0 |
| 0 | 0            | 0 | -0.1241872   | 0 | 0           | 0 | 0.017074138  | 0 |
| 0 | 0            | 0 | -0.12381688  | 0 | 0           | 0 | 0.014598574  | 0 |
| 0 | -0.001469944 | 0 | -0.12511752  | 0 | 0           | 0 | 0.015632009  | 0 |
| 0 | 0            | 0 | -0.12655183  | 0 | 0           | 0 | 0            | 0 |
| 0 | -0.084407672 | 0 | 0            | 0 | -0.13820548 | 0 | 0            | 0 |
| 0 | -0.082272743 | 0 | -0.13787705  | 0 | 0           | 0 | 0            | 0 |
| 0 | -0.006433261 | 0 | -0.12456733  | 0 | 0           | 0 | 0            | 0 |
| 0 | 0            | 0 | 0            | 0 | -0.12582725 | 0 | 0.035769023  | 0 |
| 0 | 0            | 0 | -0.12385989  | 0 | 0           | 0 | 0            | 0 |
| 0 | -0.008325674 | 0 | -0.13260489  | 0 | 0           | 0 | 0            | 0 |
| 0 | -1.0137923   | 0 | -0.11195169  | 0 | 0           | 0 | 0            | 0 |
| 0 | 0            | 0 | -0.13180207  | 0 | 0           | 0 | 0            | 0 |
| 0 | -1.075033    | 0 | -0.10504452  | 0 | 0           | 0 | 0            | 0 |
| 0 | 0            | 0 | 0            | 0 | -0.11855314 | 0 | 0            | 0 |
| 0 | -0.96259298  | 0 | 0            | 0 | 0           | 0 | 0            | 0 |
| 0 | 0            | 0 | -0.13522631  | 0 | 0           | 0 | 0            | 0 |
| 0 | 0            | 0 | 0            | 0 | -0.13530612 | 0 | 0            | 0 |
| 0 | 0            | 0 | 0            | 0 | -0.12442259 | 0 | 0.037358306  | 0 |
| 0 | 0            | 0 | -0.12085881  | 0 | 0           | 0 | 0.033555338  | 0 |
| 0 | -0.078950566 | 0 | -0.13178732  | 0 | 0           | 0 | 0            | 0 |
| 0 | -0.065443987 | 0 | 0            | 0 | -0.15468243 | 0 | 0.064151605  | 0 |
| 0 | 0            | 0 | -0.11411675  | 0 | 0           | 0 | 0            | 0 |
| 0 | -0.93437753  | 0 | 0            | 0 | 0           | 0 | 0            | 0 |
| 0 | -1.0245254   | 0 | 0            | 0 | -0.12523228 | 0 | 0.060255951  | 0 |
| 0 | 0            | 0 | -0.01215386  | 0 | -0.11470611 | 0 | 0            | 0 |
| 0 | -0.9677635   | 0 | 0            | 0 | 0           | 0 | -0.016084877 | 0 |
| 0 | -0.96840105  | 0 | 0            | 0 | 0           | 0 | 0            | 0 |
| 0 | 0            | 0 | 0            | 0 | -0.15148902 | 0 | 0.064456733  | 0 |
| 0 | -0.96993524  | 0 | 0            | 0 | 0           | 0 | 0            | 0 |
| 0 | -0.9691622   | 0 | 0            | 0 | 0           | 0 | 0            | 0 |
| 0 | 0            | 0 | -0.12904474  | 0 | 0           | 0 | 0            | 0 |
| 0 | 0            | 0 | -0.11915976  | 0 | 0           | 0 | 0.035596729  | 0 |
| 0 | -1.0236403   | 0 | -0.12177204  | 0 | 0           | 0 | 0.058871975  | 0 |
| 0 | 0            | 0 | 0.004071046  | 0 | -0.12540887 | 0 | 0            | 0 |
| 0 | -0.060148646 | 0 | -0.14822052  | 0 | 0           | 0 | 0.062338665  | 0 |
| 0 | 0            | 0 | -0.003120408 | 0 | -0.13703851 | 0 | 0.065493122  | 0 |
| 0 | 0            | 0 | -0.1451508   | 0 | 0           | 0 | 0.062682702  | 0 |
| 0 | 0            | 0 | 0            | 0 | -0.10707135 | 0 | 0.015639917  | 0 |
| 0 | 0            | 0 | 0            | 0 | -0.10531596 | 0 | 0            | 0 |
| 0 | 0            | 0 | 0            | 0 | -0.11081272 | 0 | 0.028638601  | 0 |
| 0 | 0.006189345  | 0 | 0            | 0 | -0.10582962 | 0 | 0            | 0 |
| 0 | 0            | 0 | -0.001838671 | 0 | -0.10447289 | 0 | 0            | 0 |
| 0 | 0.014669175  | 0 | 0            | 0 | -0.11140833 | 0 | 0.027320801  | 0 |
| 0 | -0.037163744 | 0 | 0            | 0 | 0           | 0 | 0            | 0 |
| 0 | 0            | 0 | -0.006605917 | 0 | -0.10615736 | 0 | 0.024739852  | 0 |

|   |              |   |              |   |              |   |              |
|---|--------------|---|--------------|---|--------------|---|--------------|
| 0 | -0.066146472 | 0 | 0            | 0 | 0            | 0 | 0            |
| 0 | 0            | 0 | -0.10344997  | 0 | 0            | 0 | 0.014307626  |
| 0 | 0            | 0 | 0            | 0 | 0            | 0 | 0            |
| 0 | 0            | 0 | -0.10193824  | 0 | 0            | 0 | 0            |
| 0 | 0            | 0 | -0.10727412  | 0 | 0            | 0 | 0.02702593   |
| 0 | 0            | 0 | 0            | 0 | 0            | 0 | 0            |
| 0 | 0            | 0 | 0            | 0 | 0            | 0 | -0.009998732 |
| 0 | 0.006687504  | 0 | -0.10243882  | 0 | 0            | 0 | 0            |
| 0 | 0            | 0 | 0            | 0 | 0            | 0 | 0            |
| 0 | 0            | 0 | 0            | 0 | 0            | 0 | 0            |
| 0 | 0            | 0 | 0            | 0 | -0.10862712  | 0 | 0.029059044  |
| 0 | 0.014671973  | 0 | -0.1078837   | 0 | 0            | 0 | 0.025697778  |
| 0 | -0.04282859  | 0 | 0            | 0 | 0            | 0 | -0.018114051 |
| 0 | 0            | 0 | 0            | 0 | 0            | 0 | 0            |
| 0 | 0            | 0 | -0.016309201 | 0 | -0.097398548 | 0 | 0            |
| 0 | 0.015088227  | 0 | 0            | 0 | -0.10914153  | 0 | 0.027563901  |
| 0 | 0.00634984   | 0 | -0.01637989  | 0 | -0.097818531 | 0 | 0            |
| 0 | -0.036953563 | 0 | 0            | 0 | 0            | 0 | 0            |
| 0 | -0.038323429 | 0 | 0            | 0 | 0            | 0 | 0            |
| 0 | 0            | 0 | 0.003953455  | 0 | -0.11393886  | 0 | 0.024727418  |
| 0 | 0            | 0 | 0            | 0 | 0            | 0 | -0.016493696 |
| 0 | 0            | 0 | 0            | 0 | 0            | 0 | 0            |
| 0 | -1.0200592   | 0 | 0            | 0 | -0.17821707  | 0 | 0            |
| 0 | 0            | 0 | 0            | 0 | 0            | 0 | -0.01160348  |
| 0 | 0            | 0 | 0            | 0 | 0            | 0 | 0            |
| 0 | 0            | 0 | 0            | 0 | 0            | 0 | 0            |
| 0 | 0            | 0 | 0            | 0 | 0            | 0 | -0.012220922 |
| 0 | 0            | 0 | 0            | 0 | 0            | 0 | -0.012816965 |
| 0 | 0            | 0 | 0            | 0 | 0            | 0 | 0            |
| 0 | 0            | 0 | 0            | 0 | 0            | 0 | 0            |
| 0 | 0            | 0 | -0.10477366  | 0 | 0            | 0 | 0.027997184  |
| 0 | 0            | 0 | 0            | 0 | 0            | 0 | -0.016768249 |
| 0 | 0            | 0 | 0            | 0 | 0            | 0 | 0            |
| 0 | 0            | 0 | 0            | 0 | 0            | 0 | 0            |
| 0 | 0            | 0 | -0.000178417 | 0 | -0.10812663  | 0 | 0            |
| 0 | 0.015323261  | 0 | -0.10529339  | 0 | 0            | 0 | 0.026498613  |
| 0 | 0            | 0 | 0            | 0 | 0            | 0 | -0.014276242 |
| 0 | 0            | 0 | 0            | 0 | 0            | 0 | 0            |
| 0 | 0.00776174   | 0 | 0            | 0 | 0            | 0 | 0            |
| 0 | 0            | 0 | 0            | 0 | 0            | 0 | -0.017181766 |
| 0 | 0            | 0 | 0            | 0 | 0            | 0 | -0.016729072 |
| 0 | 0.006735238  | 0 | -0.000267378 | 0 | -0.10857781  | 0 | 0            |
| 0 | 0.004618972  | 0 | 0            | 0 | 0            | 0 | -0.016022603 |
| 0 | 0            | 0 | 0            | 0 | 0            | 0 | 0            |
| 0 | 0            | 0 | 0            | 0 | 0            | 0 | 0            |
| 0 | 0.009801092  | 0 | 0            | 0 | 0            | 0 | 0            |
| 0 | 0.010465374  | 0 | 0            | 0 | 0            | 0 | 0            |





|   |              |   |   |   |             |             |   |
|---|--------------|---|---|---|-------------|-------------|---|
| 0 | 0            | 0 | 0 | 0 | 0           | 0           | 0 |
| 0 | 0            | 0 | 0 | 0 | 0           | 0.015181895 | 0 |
| 0 | -0.97140146  | 0 | 0 | 0 | 0           | 0           | 0 |
| 0 | 0            | 0 | 0 | 0 | 0           | 0           | 0 |
| 0 | 0            | 0 | 0 | 0 | 0           | 0           | 0 |
| 0 | 0.017030563  | 0 | 0 | 0 | 0           | 0           | 0 |
| 0 | 0            | 0 | 0 | 0 | 0           | 0.007534719 | 0 |
| 0 | 0.02229089   | 0 | 0 | 0 | 0           | 0.012592248 | 0 |
| 0 | 0            | 0 | 0 | 0 | 0           | 0.013134044 | 0 |
| 0 | 0.016412308  | 0 | 0 | 0 | 0           | 0           | 0 |
| 0 | 0            | 0 | 0 | 0 | 0           | 0           | 0 |
| 0 | 0.014888355  | 0 | 0 | 0 | 0           | 0           | 0 |
| 0 | 0            | 0 | 0 | 0 | 0           | 0.008828318 | 0 |
| 0 | 0            | 0 | 0 | 0 | 0           | 0.023166833 | 0 |
| 0 | 0            | 0 | 0 | 0 | 0           | 0.028055252 | 0 |
| 0 | 0            | 0 | 0 | 0 | 0           | 0.01826157  | 0 |
| 0 | 0            | 0 | 0 | 0 | 0           | 0           | 0 |
| 0 | -0.025917476 | 0 | 0 | 0 | 0           | 0           | 0 |
| 0 | 0.026326527  | 0 | 0 | 0 | 0           | 0.026976983 | 0 |
| 0 | 0.037311638  | 0 | 0 | 0 | 0           | 0.023912529 | 0 |
| 0 | 0            | 0 | 0 | 0 | 0           | 0.0208355   | 0 |
| 0 | 0            | 0 | 0 | 0 | 0           | 0           | 0 |
| 0 | 0            | 0 | 0 | 0 | 0           | 0           | 0 |
| 0 | 0            | 0 | 0 | 0 | 0           | 0           | 0 |
| 0 | 0            | 0 | 0 | 0 | 0           | 0.020168111 | 0 |
| 0 | 0            | 0 | 0 | 0 | 0           | 0.01186641  | 0 |
| 0 | 0.010472133  | 0 | 0 | 0 | 0           | 0           | 0 |
| 0 | 0.014817259  | 0 | 0 | 0 | 0           | 0.018546986 | 0 |
| 0 | 0            | 0 | 0 | 0 | 0           | 0.026024254 | 0 |
| 0 | -0.008766773 | 0 | 0 | 0 | 0           | 0           | 0 |
| 0 | 0            | 0 | 0 | 0 | 0           | 0           | 0 |
| 0 | 0.039438193  | 0 | 0 | 0 | 0           | 0           | 0 |
| 0 | 0            | 0 | 0 | 0 | 0           | 0.016609807 | 0 |
| 0 | 0.020394862  | 0 | 0 | 0 | 0           | 0.014993896 | 0 |
| 0 | -0.96219656  | 0 | 0 | 0 | 0           | 0           | 0 |
| 0 | 0            | 0 | 0 | 0 | 0           | 0.035099873 | 0 |
| 0 | 0            | 0 | 0 | 0 | 0           | 0.034447763 | 0 |
| 0 | -0.013686777 | 0 | 0 | 0 | 0           | 0.028056877 | 0 |
| 0 | 0            | 0 | 0 | 0 | 0           | 0.029321131 | 0 |
| 0 | 0.020950127  | 0 | 0 | 0 | 0           | 0.033160931 | 0 |
| 0 | -0.009830461 | 0 | 0 | 0 | 0           | 0.037139057 | 0 |
| 0 | 0            | 0 | 0 | 0 | 0           | 0.038019752 | 0 |
| 0 | -0.9969892   | 0 | 0 | 0 | -0.12602109 | 0           | 0 |
| 0 | -1.0007757   | 0 | 0 | 0 | -0.15080918 | 0           | 0 |
| 0 | 0            | 0 | 0 | 0 | 0           | 0.048033488 | 0 |
| 0 | -0.96693289  | 0 | 0 | 0 | -0.15199435 | 0           | 0 |
| 0 | -0.006994116 | 0 | 0 | 0 | 0           | 0           | 0 |

|   |              |   |             |   |             |             |              |
|---|--------------|---|-------------|---|-------------|-------------|--------------|
| 0 | 0            | 0 | 0           | 0 | 0           | 0           | 0            |
| 0 | 0.020542804  | 0 | 0           | 0 | 0           | 0.048199767 | 0            |
| 0 | -0.99590422  | 0 | -0.11861434 | 0 | 0           | 0           | 0            |
| 0 | -1.0025989   | 0 | 0           | 0 | -0.1394903  | 0           | 0            |
| 0 | -1.0015337   | 0 | 0           | 0 | -0.13631132 | 0           | -0.008828039 |
| 0 | -1.0026028   | 0 | 0.016363201 | 0 | -0.14958479 | 0           | 0            |
| 0 | -1.0027495   | 0 | 0           | 0 | -0.13345214 | 0           | 0            |
| 0 | -1.0028112   | 0 | 0           | 0 | -0.13328954 | 0           | 0            |
| 0 | -0.99996921  | 0 | -0.14329249 | 0 | 0           | 0           | 0            |
| 0 | -0.098312917 | 0 | 0           | 0 | -0.13420511 | 0           | 0            |
| 0 | -0.98304999  | 0 | 0           | 0 | 0           | 0.089868812 | 0            |
| 0 | -0.96895513  | 0 | -0.1450762  | 0 | 0           | 0           | 0            |
| 0 | 0            | 0 | 0           | 0 | -0.13176661 | 0           | 0            |
| 0 | -1.0016795   | 0 | -0.13258975 | 0 | 0           | 0           | 0            |
| 0 | -1.0006703   | 0 | -0.13086853 | 0 | 0           | 0           | -0.008390129 |
| 0 | -1.0016583   | 0 | -0.12559048 | 0 | 0           | 0           | 0            |
| 0 | -1.0017343   | 0 | -0.12808814 | 0 | 0           | 0           | 0            |
| 0 | 0            | 0 | 0           | 0 | -0.14011168 | 0           | 0            |
| 0 | -0.092250213 | 0 | -0.12661355 | 0 | 0           | 0           | 0            |
| 0 | -1.0019106   | 0 | 0           | 0 | -0.10925944 | 0           | 0            |
| 0 | -0.079243234 | 0 | 0           | 0 | -0.1344893  | 0           | 0            |
| 0 | -0.099176163 | 0 | 0           | 0 | -0.12655047 | 0           | -0.014121019 |
| 0 | -0.090901782 | 0 | 0           | 0 | -0.12912182 | 0           | 0            |
| 0 | -0.094888638 | 0 | 0           | 0 | -0.12747972 | 0           | 0            |
| 0 | -0.095190683 | 0 | 0.032766456 | 0 | -0.15890353 | 0           | 0            |
| 0 | -0.94850324  | 0 | 0           | 0 | -0.10292971 | 0           | 0            |
| 0 | 0            | 0 | -0.12430163 | 0 | 0           | 0           | 0            |
| 0 | 0            | 0 | 0           | 0 | -0.1420105  | 0           | 0            |
| 0 | -0.038201429 | 0 | 0           | 0 | -0.16257064 | 0           | 0            |
| 0 | 0            | 0 | 0           | 0 | -0.14002464 | 0           | -0.009621018 |
| 0 | 0            | 0 | 0           | 0 | -0.14024455 | 0           | 0            |
| 0 | 0            | 0 | 0           | 0 | -0.13372286 | 0           | 0            |
| 0 | 0            | 0 | 0           | 0 | -0.14003542 | 0           | 0            |
| 0 | 0.003563428  | 0 | 0           | 0 | -0.1405713  | 0           | 0            |
| 0 | 0            | 0 | 0.011897086 | 0 | -0.15223683 | 0           | 0            |
| 0 | 0            | 0 | 0           | 0 | -0.12091329 | 0           | 0            |
| 0 | 0            | 0 | -0.13203275 | 0 | 0           | 0           | 0            |
| 0 | -1.0008958   | 0 | -0.10445883 | 0 | 0           | 0           | 0            |
| 0 | 0            | 0 | 0           | 0 | -0.16054603 | 0           | 0            |
| 0 | 0            | 0 | 0           | 0 | -0.12664512 | 0           | 0            |
| 0 | 0            | 0 | 0           | 0 | -0.1570429  | 0           | 0.008631725  |
| 0 | 0            | 0 | 0           | 0 | -0.12391594 | 0           | -0.012672399 |
| 0 | 0            | 0 | 0           | 0 | -0.1247877  | 0           | 0            |
| 0 | 0            | 0 | 0           | 0 | -0.15680232 | 0           | 0            |
| 0 | 0            | 0 | 0           | 0 | -0.15750853 | 0           | 0            |
| 0 | 0            | 0 | 0.007050934 | 0 | -0.16419589 | 0           | 0            |
| 0 | -0.048978534 | 0 | 0.01561867  | 0 | -0.16787912 | 0           | 0            |

|   |              |   |              |   |              |   |              |   |
|---|--------------|---|--------------|---|--------------|---|--------------|---|
| 0 | -0.049580498 | 0 | 0            | 0 | -0.15220002  | 0 | 0            | 0 |
| 0 | -0.049216075 | 0 | 0            | 0 | -0.15249949  | 0 | 0            | 0 |
| 0 | -0.0490849   | 0 | 0            | 0 | -0.15241559  | 0 | 0.00076637   | 0 |
| 0 | -1.00342     | 0 | 0            | 0 | -0.15475695  | 0 | 0            | 0 |
| 0 | 0            | 0 | 0.032232661  | 0 | -0.15569139  | 0 | 0            | 0 |
| 0 | -0.9479118   | 0 | -0.098513799 | 0 | 0            | 0 | 0            | 0 |
| 0 | 0            | 0 | 0            | 0 | -0.12504935  | 0 | 0            | 0 |
| 0 | 0            | 0 | 0            | 0 | -0.11534934  | 0 | 0            | 0 |
| 0 | -0.093691579 | 0 | -0.11906924  | 0 | 0            | 0 | -0.015295245 | 0 |
| 0 | -1.0016935   | 0 | 0            | 0 | -0.097325407 | 0 | -0.01351006  | 0 |
| 0 | -0.075663406 | 0 | -0.12565195  | 0 | 0            | 0 | 0            | 0 |
| 0 | 0            | 0 | 0.022796991  | 0 | -0.13711421  | 0 | 0            | 0 |
| 0 | -1.0034684   | 0 | 0            | 0 | -0.098264317 | 0 | 0            | 0 |
| 0 | 0            | 0 | 0.015992584  | 0 | -0.16500549  | 0 | 0            | 0 |
| 0 | 0            | 0 | 0            | 0 | -0.1328518   | 0 | 0            | 0 |
| 0 | -0.084991025 | 0 | -0.12164076  | 0 | 0            | 0 | 0            | 0 |
| 0 | 0            | 0 | 0            | 0 | -0.14960318  | 0 | 0            | 0 |
| 0 | 0            | 0 | 0            | 0 | -0.1493093   | 0 | 0            | 0 |
| 0 | 0            | 0 | 0            | 0 | -0.14922843  | 0 | 0.000471752  | 0 |
| 0 | 0            | 0 | 0            | 0 | -0.11516769  | 0 | 0.001598975  | 0 |
| 0 | -0.088933639 | 0 | -0.11972783  | 0 | 0            | 0 | 0            | 0 |
| 0 | -1.0037138   | 0 | 0.022189131  | 0 | -0.11919018  | 0 | 0            | 0 |
| 0 | 0            | 0 | 0            | 0 | -0.15341716  | 0 | 0.003323475  | 0 |
| 0 | 0            | 0 | 0            | 0 | -0.15419743  | 0 | 0            | 0 |
| 0 | 0            | 0 | 0.005465627  | 0 | -0.15901974  | 0 | 0            | 0 |
| 0 | 0            | 0 | 0            | 0 | -0.15367889  | 0 | 0            | 0 |
| 0 | 0            | 0 | 0            | 0 | -0.13123455  | 0 | -0.00615361  | 0 |
| 0 | 0            | 0 | 0.022672993  | 0 | -0.15349172  | 0 | 0            | 0 |
| 0 | 0            | 0 | 0            | 0 | -0.13175224  | 0 | 0            | 0 |
| 0 | 0.005833013  | 0 | 0            | 0 | -0.15470133  | 0 | 0            | 0 |
| 0 | 0.006374842  | 0 | 0            | 0 | -0.1540699   | 0 | 0.00185101   | 0 |
| 0 | 0.005394605  | 0 | 0            | 0 | -0.15413374  | 0 | 0            | 0 |
| 0 | 0.005816909  | 0 | 0.005393468  | 0 | -0.15947278  | 0 | 0            | 0 |
| 0 | 0            | 0 | 0            | 0 | -0.15543897  | 0 | 0            | 0 |
| 0 | 0            | 0 | 0.004963612  | 0 | -0.15928047  | 0 | 0            | 0 |
| 0 | 0            | 0 | 0            | 0 | -0.15440657  | 0 | 0.000719838  | 0 |
| 0 | 0            | 0 | 0.0054497    | 0 | -0.16040821  | 0 | 0            | 0 |
| 0 | 0            | 0 | 0            | 0 | -0.15509481  | 0 | 0.000924407  | 0 |
| 0 | 0            | 0 | 0.005436409  | 0 | -0.15989393  | 0 | 0.000611944  | 0 |
| 0 | 0            | 0 | 0.016469221  | 0 | -0.16000089  | 0 | 0            | 0 |
| 0 | 0            | 0 | -0.11542974  | 0 | 0            | 0 | 0            | 0 |
| 0 | 0            | 0 | 0            | 0 | -0.14409252  | 0 | 0            | 0 |
| 0 | 0            | 0 | 0            | 0 | -0.14371622  | 0 | 0.001182446  | 0 |
| 0 | 0            | 0 | -0.13386876  | 0 | 0            | 0 | 0            | 0 |
| 0 | 0            | 0 | 0.017097819  | 0 | -0.15848739  | 0 | 0            | 0 |
| 0 | 0            | 0 | 0.016783991  | 0 | -0.15794709  | 0 | 6.95E-05     | 0 |
| 0 | 0            | 0 | 0            | 0 | -0.14172248  | 0 | -0.000195152 | 0 |

|   |              |   |              |   |             |   |              |   |
|---|--------------|---|--------------|---|-------------|---|--------------|---|
| 0 | 0            | 0 | -0.13228143  | 0 | 0           | 0 | -0.011015127 | 0 |
| 0 | 0            | 0 | -0.13247852  | 0 | 0           | 0 | 0            | 0 |
| 0 | 0            | 0 | -0.13216455  | 0 | 0           | 0 | 0            | 0 |
| 0 | 0            | 0 | 0            | 0 | -0.11973397 | 0 | 0            | 0 |
| 0 | 0.004178208  | 0 | -0.13278869  | 0 | 0           | 0 | 0            | 0 |
| 0 | 0            | 0 | -0.12504214  | 0 | 0           | 0 | 0            | 0 |
| 0 | 0            | 0 | -0.11926932  | 0 | 0           | 0 | 0            | 0 |
| 0 | -1.0028695   | 0 | -0.14849452  | 0 | 0           | 0 | 0            | 0 |
| 0 | -1.0004614   | 0 | -0.092942523 | 0 | 0           | 0 | -0.014333117 | 0 |
| 0 | -0.033224205 | 0 | -0.15432778  | 0 | 0           | 0 | 0            | 0 |
| 0 | 0            | 0 | -0.1193242   | 0 | 0           | 0 | 0            | 0 |
| 0 | 0            | 0 | -0.11656976  | 0 | 0           | 0 | -0.013810338 | 0 |
| 0 | -1.0023598   | 0 | -0.093616791 | 0 | 0           | 0 | 0            | 0 |
| 0 | -1.0079172   | 0 | 0            | 0 | -0.12974784 | 0 | 0.018344544  | 0 |
| 0 | 0            | 0 | -0.11718518  | 0 | 0           | 0 | 0            | 0 |
| 0 | 0            | 0 | 0            | 0 | -0.13171382 | 0 | 0            | 0 |
| 0 | 0            | 0 | -0.10970654  | 0 | 0           | 0 | 0            | 0 |
| 0 | 0            | 0 | -0.15241649  | 0 | 0           | 0 | 0            | 0 |
| 0 | 0            | 0 | -0.14971257  | 0 | 0           | 0 | 0.007388856  | 0 |
| 0 | 0            | 0 | -0.10949037  | 0 | 0           | 0 | -6.51E-05    | 0 |
| 0 | -1.0209936   | 0 | 0            | 0 | -0.12739851 | 0 | 0            | 0 |
| 0 | 0            | 0 | -0.14896217  | 0 | 0           | 0 | 0            | 0 |
| 0 | 0            | 0 | -0.15002219  | 0 | 0           | 0 | 0            | 0 |
| 0 | -0.045112876 | 0 | -0.14387815  | 0 | 0           | 0 | 0            | 0 |
| 0 | -0.043973245 | 0 | -0.14478896  | 0 | 0           | 0 | 0            | 0 |
| 0 | -0.043457133 | 0 | -0.14487515  | 0 | 0           | 0 | 0.000220292  | 0 |
| 0 | 0            | 0 | 0            | 0 | -0.13261406 | 0 | -0.013315335 | 0 |
| 0 | 0            | 0 | 0            | 0 | -0.14010196 | 0 | 0            | 0 |
| 0 | 0            | 0 | 0            | 0 | -0.11478126 | 0 | -0.009569276 | 0 |
| 0 | 0            | 0 | 0            | 0 | -0.14180643 | 0 | -0.00574743  | 0 |
| 0 | 0            | 0 | 0            | 0 | -0.13291596 | 0 | 0            | 0 |
| 0 | 0            | 0 | 0.014217659  | 0 | -0.15507827 | 0 | 0            | 0 |
| 0 | 0.002562538  | 0 | 0            | 0 | -0.1408906  | 0 | 0            | 0 |
| 0 | 0            | 0 | 0            | 0 | -0.13902598 | 0 | -0.006219676 | 0 |
| 0 | -0.006468729 | 0 | 0            | 0 | -0.1160978  | 0 | 0            | 0 |
| 0 | 0            | 0 | 0.01688526   | 0 | -0.15444868 | 0 | 0            | 0 |
| 0 | 0            | 0 | 0.011238639  | 0 | -0.12631816 | 0 | 0            | 0 |
| 0 | 0            | 0 | 0.020568004  | 0 | -0.15336506 | 0 | 0            | 0 |
| 0 | 0            | 0 | 0            | 0 | -0.11542566 | 0 | 0            | 0 |
| 0 | 0.005188662  | 0 | 0            | 0 | -0.13322302 | 0 | 0            | 0 |
| 0 | -1.005457    | 0 | 0            | 0 | -0.13829668 | 0 | 0            | 0 |
| 0 | 0            | 0 | 0.014552645  | 0 | -0.15438509 | 0 | -0.008158559 | 0 |
| 0 | 0            | 0 | -0.1244386   | 0 | 0           | 0 | 0            | 0 |
| 0 | 0.003388601  | 0 | 0            | 0 | -0.13979487 | 0 | -0.007706305 | 0 |
| 0 | -1.0058047   | 0 | -0.012961657 | 0 | -0.12316543 | 0 | 0            | 0 |
| 0 | 0            | 0 | 0            | 0 | -0.13092013 | 0 | -0.012481353 | 0 |
| 0 | 0            | 0 | 0.023917465  | 0 | -0.1368545  | 0 | 0            | 0 |

|   |              |   |             |   |             |   |              |   |
|---|--------------|---|-------------|---|-------------|---|--------------|---|
| 0 | 0.005762613  | 0 | 0.016825658 | 0 | -0.15488436 | 0 | 0            | 0 |
| 0 | 0            | 0 | 0.014916391 | 0 | -0.14946512 | 0 | -0.009257487 | 0 |
| 0 | 0            | 0 | 0.01648954  | 0 | -0.14712259 | 0 | -0.014444505 | 0 |
| 0 | 0            | 0 | 0           | 0 | -0.11333908 | 0 | -0.004210195 | 0 |
| 0 | 0            | 0 | 0           | 0 | -0.13069946 | 0 | -0.014456804 | 0 |
| 0 | 0            | 0 | 0           | 0 | -0.13481199 | 0 | -0.009439889 | 0 |
| 0 | 0.000739554  | 0 | 0           | 0 | -0.13114381 | 0 | -0.014370151 | 0 |
| 0 | 0            | 0 | -0.1231985  | 0 | 0           | 0 | -0.007677213 | 0 |
| 0 | 0            | 0 | 0.013907443 | 0 | -0.14951478 | 0 | -0.010850974 | 0 |
| 0 | 0.002383826  | 0 | 0.014458438 | 0 | -0.14996685 | 0 | -0.010606295 | 0 |
| 0 | 0.001658452  | 0 | 0           | 0 | -0.13571007 | 0 | -0.010756569 | 0 |
| 0 | 0            | 0 | 0.017336376 | 0 | -0.14884345 | 0 | 0            | 0 |
| 0 | 0            | 0 | 0.017962521 | 0 | -0.14882015 | 0 | 0            | 0 |
| 0 | 0            | 0 | -0.12344881 | 0 | 0           | 0 | 0            | 0 |
| 0 | 0            | 0 | 0           | 0 | -0.13121971 | 0 | 0            | 0 |
| 0 | 0            | 0 | -0.14170291 | 0 | 0           | 0 | 0            | 0 |
| 0 | 0            | 0 | -0.14138423 | 0 | 0           | 0 | 0            | 0 |
| 0 | 0            | 0 | -0.14179917 | 0 | 0           | 0 | -5.45E-05    | 0 |
| 0 | 0            | 0 | -0.14650462 | 0 | 0           | 0 | 0.002750271  | 0 |
| 0 | 0            | 0 | -0.14666662 | 0 | 0           | 0 | 0            | 0 |
| 0 | 0            | 0 | -0.1465851  | 0 | 0           | 0 | 0            | 0 |
| 0 | 0.004901299  | 0 | 0.017081344 | 0 | -0.14906908 | 0 | 0            | 0 |
| 0 | 0.005515699  | 0 | 0.018015047 | 0 | -0.14916811 | 0 | 0            | 0 |
| 0 | 0            | 0 | 0.017586661 | 0 | -0.14849617 | 0 | 0            | 0 |
| 0 | 0.004737526  | 0 | 0           | 0 | -0.13136736 | 0 | 0            | 0 |
| 0 | 0.005786322  | 0 | -0.14712112 | 0 | 0           | 0 | 0            | 0 |
| 0 | 0.007011999  | 0 | -0.14715668 | 0 | 0           | 0 | 0.00127192   | 0 |
| 0 | 0.006612299  | 0 | -0.14707269 | 0 | 0           | 0 | 0            | 0 |
| 0 | 0            | 0 | -0.14790685 | 0 | 0           | 0 | 0            | 0 |
| 0 | 0            | 0 | -0.14745834 | 0 | 0           | 0 | 0.000108506  | 0 |
| 0 | 0            | 0 | -0.11343248 | 0 | 0           | 0 | 0            | 0 |
| 0 | 0            | 0 | -0.14753066 | 0 | 0           | 0 | -0.00032701  | 0 |
| 0 | -1.008102    | 0 | 0           | 0 | -0.14264391 | 0 | 0            | 0 |
| 0 | 0            | 0 | 0.029827548 | 0 | -0.13825922 | 0 | 0            | 0 |
| 0 | -1.0070569   | 0 | -0.12568003 | 0 | 0           | 0 | 0.017489124  | 0 |
| 0 | 0            | 0 | 0           | 0 | -0.11647359 | 0 | -0.009958817 | 0 |
| 0 | 0            | 0 | -0.13688117 | 0 | 0           | 0 | 0            | 0 |
| 0 | 0            | 0 | -0.13655364 | 0 | 0           | 0 | 8.56E-05     | 0 |
| 0 | 0            | 0 | 0           | 0 | -0.10907139 | 0 | -0.002238355 | 0 |
| 0 | 0            | 0 | -0.13552999 | 0 | 0           | 0 | -0.000572829 | 0 |
| 0 | -0.009259429 | 0 | 0           | 0 | -0.11831579 | 0 | 0            | 0 |
| 0 | 0            | 0 | 0.021281033 | 0 | -0.13788216 | 0 | 0            | 0 |
| 0 | 0            | 0 | 0           | 0 | -0.11747835 | 0 | 0            | 0 |
| 0 | 0            | 0 | 0.027768462 | 0 | -0.13553409 | 0 | -0.002823015 | 0 |
| 0 | -1.0201371   | 0 | -0.12320404 | 0 | 0           | 0 | 0            | 0 |
| 0 | -1.0735991   | 0 | 0           | 0 | -0.13554247 | 0 | 0            | 0 |
| 0 | 0            | 0 | -0.1101269  | 0 | 0           | 0 | -0.0106779   | 0 |

|   |              |   |              |             |   |              |   |
|---|--------------|---|--------------|-------------|---|--------------|---|
| 0 | -1.0048968   | 0 | -0.13336475  | 0           | 0 | 0            | 0 |
| 0 | -0.005607454 | 0 | -0.11133369  | 0           | 0 | 0            | 0 |
| 0 | 0            | 0 | -0.11067609  | 0           | 0 | 0            | 0 |
| 0 | 0            | 0 | -0.12361479  | 0           | 0 | 0            | 0 |
| 0 | 0            | 0 | -0.10769353  | 0           | 0 | -0.005778893 | 0 |
| 0 | 0            | 0 | -0.12458144  | 0           | 0 | -0.01473929  | 0 |
| 0 | 0            | 0 | -0.1247982   | 0           | 0 | 0            | 0 |
| 0 | 0            | 0 | -0.1331899   | 0           | 0 | 0            | 0 |
| 0 | 0            | 0 | -0.12329483  | 0           | 0 | -0.013695771 | 0 |
| 0 | 0            | 0 | -0.13509819  | 0           | 0 | -0.006430161 | 0 |
| 0 | 0            | 0 | -0.12293556  | 0           | 0 | -0.015657719 | 0 |
| 0 | 0            | 0 | -0.13226608  | 0           | 0 | -0.00669531  | 0 |
| 0 | 0.003387121  | 0 | -0.13396545  | 0           | 0 | 0            | 0 |
| 0 | 0.000905063  | 0 | -0.12351932  | 0           | 0 | -0.015584292 | 0 |
| 0 | 0.005817167  | 0 | -0.12508393  | 0           | 0 | 0            | 0 |
| 0 | 0            | 0 | -0.1293257   | 0           | 0 | -0.008964232 | 0 |
| 0 | 0.004002647  | 0 | -0.13303128  | 0           | 0 | -0.00819031  | 0 |
| 0 | 0.002227037  | 0 | -0.13022736  | 0           | 0 | -0.01028942  | 0 |
| 0 | 0            | 0 | -0.1233445   | 0           | 0 | 0            | 0 |
| 0 | -1.0074519   | 0 | -0.13678256  | 0           | 0 | 0            | 0 |
| 0 | 0            | 0 | -0.11064354  | 0           | 0 | -0.011340334 | 0 |
| 0 | 0.004866814  | 0 | -0.12349205  | 0           | 0 | 0            | 0 |
| 0 | 0            | 0 | -0.10322693  | 0           | 0 | -0.003903933 | 0 |
| 0 | -0.008005143 | 0 | -0.11229915  | 0           | 0 | 0            | 0 |
| 0 | 0            | 0 | -0.1114919   | 0           | 0 | 0            | 0 |
| 0 | 0            | 0 | 0            | -0.10252445 | 0 | -0.01055766  | 0 |
| 0 | -0.064180741 | 0 | 0            | -0.15055944 | 0 | 0.027037098  | 0 |
| 0 | 0            | 0 | 0            | -0.10268951 | 0 | 0            | 0 |
| 0 | 0            | 0 | 0.020027448  | -0.12260303 | 0 | 0            | 0 |
| 0 | 0            | 0 | 0.017134925  | -0.11864515 | 0 | -0.01122591  | 0 |
| 0 | 0            | 0 | 0            | -0.10181282 | 0 | -0.010310104 | 0 |
| 0 | -0.003044881 | 0 | 0            | -0.1021942  | 0 | -0.012051907 | 0 |
| 0 | 0.000666496  | 0 | 0            | -0.10314039 | 0 | 0            | 0 |
| 0 | -1.0718539   | 0 | -0.12920368  | 0           | 0 | 0            | 0 |
| 0 | 0            | 0 | 0.018242476  | -0.11987968 | 0 | 0            | 0 |
| 0 | -0.009351411 | 0 | 0            | -0.10773592 | 0 | -0.016653598 | 0 |
| 0 | 0.000884905  | 0 | 0.018164323  | -0.12024613 | 0 | 0            | 0 |
| 0 | 0            | 0 | 0.015982404  | -0.12245762 | 0 | -0.014347808 | 0 |
| 0 | 0            | 0 | 0            | -0.10710208 | 0 | -0.014800421 | 0 |
| 0 | -0.071888347 | 0 | 0            | -0.14630194 | 0 | 0            | 0 |
| 0 | -0.003791929 | 0 | 0.017432573  | -0.1249836  | 0 | 0            | 0 |
| 0 | 0            | 0 | 0.017533423  | -0.12440805 | 0 | 0            | 0 |
| 0 | 0            | 0 | 0            | -0.14739612 | 0 | 0.027274087  | 0 |
| 0 | -1.0189517   | 0 | 0            | -0.15287205 | 0 | 0.064410278  | 0 |
| 0 | -0.07139336  | 0 | 0            | -0.15162259 | 0 | 0            | 0 |
| 0 | 0            | 0 | -0.098002174 | 0           | 0 | -0.011635957 | 0 |
| 0 | 0            | 0 | -0.097442111 | 0           | 0 | -0.011202184 | 0 |

|   |              |   |              |   |              |              |              |
|---|--------------|---|--------------|---|--------------|--------------|--------------|
| 0 | -0.002708205 | 0 | -0.097821987 | 0 | 0            | -0.012946435 | 0            |
| 0 | 0            | 0 | -0.098106165 | 0 | 0            | 0            | 0            |
| 0 | 0.001342628  | 0 | -0.098541172 | 0 | 0            | 0            | 0            |
| 0 | 0            | 0 | 0            | 0 | -0.14366757  | 0            | 0            |
| 0 | -0.066106621 | 0 | -0.012443492 | 0 | -0.14412969  | 0            | 0            |
| 0 | -0.008829089 | 0 | -0.10301455  | 0 | 0            | -0.017544849 | 0            |
| 0 | 0            | 0 | -0.10238199  | 0 | 0            | -0.015686532 | 0            |
| 0 | -0.058871322 | 0 | -0.14400059  | 0 | 0            | 0.025337405  | 0            |
| 0 | 0            | 0 | 0            | 0 | -0.1490824   | 0            | 0            |
| 0 | 0            | 0 | 0            | 0 | -0.13403802  | 0            | 0.025650685  |
| 0 | 0            | 0 | 0            | 0 | -0.13772288  | 0            | 0.02941574   |
| 0 | 0            | 0 | 0.001264307  | 0 | -0.13746809  | 0            | 0.028250861  |
| 0 | -0.066373788 | 0 | -0.13992943  | 0 | 0            | 0            | 0            |
| 0 | 0            | 0 | -0.012433194 | 0 | -0.14104093  | 0            | 0            |
| 0 | 0            | 0 | 0.023782937  | 0 | -0.11935315  | 0            | -0.014698323 |
| 0 | 0            | 0 | 0            | 0 | -0.096001823 | 0            | -0.013610648 |
| 0 | 0            | 0 | -0.14096105  | 0 | 0            | 0.02561263   | 0            |
| 0 | -0.002570853 | 0 | 0            | 0 | -0.096395319 | 0            | -0.015483066 |
| 0 | -1.0180585   | 0 | -0.1465289   | 0 | 0            | 0.062610118  | 0            |
| 0 | -0.079779867 | 0 | 0            | 0 | -0.14174905  | 0            | 0.03015096   |
| 0 | -0.087888413 | 0 | 0            | 0 | -0.13583862  | 0            | 0            |
| 0 | 0            | 0 | 0.021999217  | 0 | -0.11676092  | 0            | -0.014347866 |
| 0 | -0.002556799 | 0 | 0.021816532  | 0 | -0.11697789  | 0            | -0.016220655 |
| 0 | -0.066479264 | 0 | -0.14502486  | 0 | 0            | 0            | 0            |
| 0 | 0            | 0 | 0.02550888   | 0 | -0.12114512  | 0            | 0            |
| 0 | 0.002528982  | 0 | 0.025554904  | 0 | -0.12162998  | 0            | 0            |
| 0 | 0            | 0 | 0            | 0 | -0.13327173  | 0            | 0            |
| 0 | 0            | 0 | -0.002144244 | 0 | -0.13084707  | 0            | 0            |
| 0 | 0            | 0 | -0.13744606  | 0 | 0            | 0            | 0            |
| 0 | -1.0482811   | 0 | 0            | 0 | -0.10593276  | 0            | 0            |
| 0 | 0            | 0 | -0.011266553 | 0 | -0.12835078  | 0            | 0            |
| 0 | 0            | 0 | -0.12888933  | 0 | 0            | 0.023838345  | 0            |
| 0 | 0            | 0 | -0.14262932  | 0 | 0            | 0            | 0            |
| 0 | 0            | 0 | -0.13205897  | 0 | 0            | 0.027187865  | 0            |
| 0 | 0            | 0 | -0.091424008 | 0 | 0            | -0.014519918 | 0            |
| 0 | 0            | 0 | 0            | 0 | -0.13885965  | 0            | 0.031110226  |
| 0 | -0.002226238 | 0 | -0.091813928 | 0 | 0            | -0.016393118 | 0            |
| 0 | -1.0171814   | 0 | 0            | 0 | -0.11253952  | 0            | 0.029044989  |
| 0 | 0            | 0 | 0            | 0 | -0.13265532  | 0            | 0.019368505  |
| 0 | 0            | 0 | 0            | 0 | -0.13403117  | 0            | 0.022973171  |
| 0 | -0.002451076 | 0 | 0            | 0 | -0.13502661  | 0            | 0.021602363  |
| 0 | 0            | 0 | -0.004316404 | 0 | -0.13050307  | 0            | 0.021949952  |
| 0 | 0            | 0 | 0            | 0 | -0.13305239  | 0            | 0            |
| 0 | 0            | 0 | 0            | 0 | -0.12748855  | 0            | 0.016950786  |
| 0 | 0            | 0 | -0.002993728 | 0 | -0.12533179  | 0            | 0.017846301  |
| 0 | -0.00216581  | 0 | 0            | 0 | -0.12826298  | 0            | 0.015322107  |
| 0 | 0            | 0 | -0.002689854 | 0 | -0.12544588  | 0            | 0.015745657  |

|   |              |   |              |   |              |   |              |   |
|---|--------------|---|--------------|---|--------------|---|--------------|---|
| 0 | -0.002005559 | 0 | -0.003560546 | 0 | -0.12570871  | 0 | 0.016406162  | 0 |
| 0 | -1.0463013   | 0 | -0.10246552  | 0 | 0            | 0 | 0            | 0 |
| 0 | -0.076907208 | 0 | 0            | 0 | -0.13921751  | 0 | 0.031466494  | 0 |
| 0 | -1.0621063   | 0 | 0            | 0 | -0.10893408  | 0 | 0.026303724  | 0 |
| 0 | -0.087317328 | 0 | -0.009276255 | 0 | -0.13481117  | 0 | 0            | 0 |
| 0 | -0.008779578 | 0 | 0            | 0 | -0.13233357  | 0 | 0            | 0 |
| 0 | -0.082613659 | 0 | -0.12958892  | 0 | 0            | 0 | 0            | 0 |
| 0 | -0.074944736 | 0 | -0.13522609  | 0 | 0            | 0 | 0.028015524  | 0 |
| 0 | 0            | 0 | -0.005616229 | 0 | -0.12581759  | 0 | 0            | 0 |
| 0 | 0            | 0 | 0            | 0 | -0.13141678  | 0 | 0            | 0 |
| 0 | 0            | 0 | -0.12817969  | 0 | 0            | 0 | 0            | 0 |
| 0 | -0.007257835 | 0 | -0.005674618 | 0 | -0.12322389  | 0 | 0            | 0 |
| 0 | 0            | 0 | -0.005545997 | 0 | -0.12262509  | 0 | 0            | 0 |
| 0 | -0.009450314 | 0 | -0.013060715 | 0 | -0.12480964  | 0 | 0            | 0 |
| 0 | -1.0162016   | 0 | -0.10899337  | 0 | 0            | 0 | 0.027402451  | 0 |
| 0 | 0            | 0 | -0.013025732 | 0 | -0.12400666  | 0 | 0            | 0 |
| 0 | 0            | 0 | -0.12755414  | 0 | 0            | 0 | 0.017612504  | 0 |
| 0 | -1.0146276   | 0 | -0.017365193 | 0 | -0.098125625 | 0 | 0            | 0 |
| 0 | 0            | 0 | -0.12886619  | 0 | 0            | 0 | 0.02123834   | 0 |
| 0 | 0            | 0 | 0            | 0 | -0.13639083  | 0 | 0.032751792  | 0 |
| 0 | -0.001846299 | 0 | -0.12985744  | 0 | 0            | 0 | 0.019851213  | 0 |
| 0 | -1.0765783   | 0 | 0.000822758  | 0 | -0.10944051  | 0 | 0            | 0 |
| 0 | -1.0611395   | 0 | -0.10503983  | 0 | 0            | 0 | 0.025241406  | 0 |
| 0 | 0            | 0 | -0.13246193  | 0 | 0            | 0 | 0.02902422   | 0 |
| 0 | 0            | 0 | 0            | 0 | -0.12132522  | 0 | 0.028521383  | 0 |
| 0 | 0            | 0 | -0.009643488 | 0 | -0.13164926  | 0 | 0            | 0 |
| 0 | 0            | 0 | -0.12695759  | 0 | 0            | 0 | 0            | 0 |
| 0 | 0            | 0 | -0.1232046   | 0 | 0            | 0 | 0.015882435  | 0 |
| 0 | -0.001687517 | 0 | -0.12398159  | 0 | 0            | 0 | 0.014247751  | 0 |
| 0 | -0.007683171 | 0 | -0.12746498  | 0 | 0            | 0 | 0            | 0 |
| 0 | 0            | 0 | -0.12657593  | 0 | 0            | 0 | 0            | 0 |
| 0 | -0.084451323 | 0 | 0.00717208   | 0 | -0.1451768   | 0 | 0            | 0 |
| 0 | 0            | 0 | 0.00265663   | 0 | -0.12842297  | 0 | 0.03582042   | 0 |
| 0 | -0.96424283  | 0 | 0            | 0 | 0            | 0 | 0            | 0 |
| 0 | -0.9274814   | 0 | 0            | 0 | 0            | 0 | 0            | 0 |
| 0 | -0.071617993 | 0 | -0.13233113  | 0 | 0            | 0 | 0.029914393  | 0 |
| 0 | -0.9600572   | 0 | 0            | 0 | 0            | 0 | -0.015604859 | 0 |
| 0 | -0.96224405  | 0 | 0            | 0 | 0            | 0 | 0            | 0 |
| 0 | 0            | 0 | 0.002619472  | 0 | -0.12109636  | 0 | 0            | 0 |
| 0 | -0.96270556  | 0 | 0            | 0 | 0            | 0 | 0            | 0 |
| 0 | 0            | 0 | -0.11626277  | 0 | 0            | 0 | 0.026508151  | 0 |
| 0 | 0            | 0 | 0.006575092  | 0 | -0.14169706  | 0 | 0            | 0 |
| 0 | 0            | 0 | -0.12963926  | 0 | 0            | 0 | 0.031222651  | 0 |
| 0 | 0            | 0 | 0.011188903  | 0 | -0.13529366  | 0 | 0.037470803  | 0 |
| 0 | -0.93136428  | 0 | 0            | 0 | 0            | 0 | 0            | 0 |
| 0 | -0.93385253  | 0 | 0            | 0 | 0            | 0 | -0.014070408 | 0 |
| 0 | -0.06544769  | 0 | -0.00349819  | 0 | -0.15125925  | 0 | 0.064071025  | 0 |





|   |             |   |             |   |             |   |              |   |
|---|-------------|---|-------------|---|-------------|---|--------------|---|
| 0 | -1.0205542  | 0 | -0.05695572 | 0 | -0.12196296 | 0 | 0            | 0 |
| 0 | 0           | 0 | 0           | 0 | 0           | 0 | 0            | 0 |
| 0 | 0           | 0 | 0           | 0 | 0           | 0 | -0.015167063 | 0 |
| 0 | 0           | 0 | 0           | 0 | 0           | 0 | -0.011649465 | 0 |
| 0 | 0           | 0 | 0           | 0 | 0           | 0 | 0            | 0 |
| 0 | 0           | 0 | 0           | 0 | 0           | 0 | -0.011251586 | 0 |
| 0 | 0           | 0 | 0           | 0 | 0           | 0 | 0            | 0 |
| 0 | 0           | 0 | 0           | 0 | 0           | 0 | -0.012467362 | 0 |
| 0 | 0.006037824 | 0 | 0           | 0 | 0           | 0 | 0            | 0 |
| 0 | 0           | 0 | 0           | 0 | 0           | 0 | -0.014450017 | 0 |
| 0 | 0           | 0 | 0           | 0 | 0           | 0 | -0.016581551 | 0 |
| 0 | 0.002383426 | 0 | 0           | 0 | 0           | 0 | -0.016196347 | 0 |
| 0 | 0           | 0 | 0           | 0 | 0           | 0 | 0            | 0 |
| 0 | 0           | 0 | 0           | 0 | 0           | 0 | -0.014179928 | 0 |
| 0 | 0           | 0 | 0           | 0 | 0           | 0 | -0.013858006 | 0 |
| 0 | 0.006400981 | 0 | 0           | 0 | 0           | 0 | 0            | 0 |
| 0 | 0           | 0 | 0           | 0 | 0           | 0 | -0.016755413 | 0 |
| 0 | 0.005178472 | 0 | 0           | 0 | 0           | 0 | -0.015931017 | 0 |
| 0 | 0.004658105 | 0 | 0           | 0 | 0           | 0 | -0.015600585 | 0 |
| 0 | 0           | 0 | 0           | 0 | 0           | 0 | 0            | 0 |
| 0 | 0           | 0 | 0           | 0 | 0           | 0 | -0.016817357 | 0 |
| 0 | 0.010364856 | 0 | 0           | 0 | 0           | 0 | 0            | 0 |
| 0 | 0           | 0 | 0           | 0 | 0           | 0 | -0.015866451 | 0 |
| 0 | 0           | 0 | 0           | 0 | 0           | 0 | 0            | 0 |
| 0 | 0.001279799 | 0 | 0           | 0 | 0           | 0 | -0.017668028 | 0 |
| 0 | 0.002324759 | 0 | 0           | 0 | 0           | 0 | 0            | 0 |
| 0 | -0.99930092 | 0 | 0           | 0 | 0           | 0 | 0            | 0 |
| 0 | 0           | 0 | 0           | 0 | 0           | 0 | -0.017331561 | 0 |
| 0 | 0.001335626 | 0 | 0           | 0 | 0           | 0 | -0.019208538 | 0 |
| 0 | 0           | 0 | 0           | 0 | 0           | 0 | -0.01634232  | 0 |
| 0 | 0.005258986 | 0 | 0           | 0 | 0           | 0 | -0.01819081  | 0 |
| 0 | -1.0067118  | 0 | 0           | 0 | 0           | 0 | 0.012474313  | 0 |
| 0 | -1.010574   | 0 | 0           | 0 | 0           | 0 | 0            | 0 |
| 0 | -0.9657945  | 0 | 0           | 0 | 0           | 0 | 0.016211385  | 0 |
| 0 | -0.9646736  | 0 | 0           | 0 | 0           | 0 | 0            | 0 |
| 0 | -1.0101055  | 0 | 0           | 0 | 0           | 0 | 0            | 0 |
| 0 | -0.9634017  | 0 | 0           | 0 | 0           | 0 | 0            | 0 |
| 0 | -1.0337538  | 0 | 0           | 0 | 0           | 0 | 0            | 0 |
| 0 | -1.0275155  | 0 | 0           | 0 | 0           | 0 | 0            | 0 |
| 0 | -1.0270203  | 0 | 0           | 0 | 0           | 0 | 0.018030986  | 0 |
| 0 | -0.96492206 | 0 | 0           | 0 | 0           | 0 | 0.023960497  | 0 |
| 0 | -0.96302352 | 0 | 0           | 0 | 0           | 0 | 0.029058856  | 0 |
| 0 | -1.0370717  | 0 | 0           | 0 | 0           | 0 | 0            | 0 |
| 0 | -1.0323168  | 0 | 0           | 0 | 0           | 0 | 0.014803499  | 0 |
| 0 | -0.96041436 | 0 | 0           | 0 | 0           | 0 | 0            | 0 |
| 0 | -1.0544825  | 0 | 0           | 0 | 0           | 0 | 0.026560832  | 0 |
| 0 | -0.97353591 | 0 | 0           | 0 | 0           | 0 | 0.035010126  | 0 |

|   |              |   |             |   |             |   |              |   |
|---|--------------|---|-------------|---|-------------|---|--------------|---|
| 0 | -0.97561866  | 0 | 0           | 0 | 0           | 0 | 0.038468771  | 0 |
| 0 | -0.97030724  | 0 | 0           | 0 | 0           | 0 | 0.04860888   | 0 |
| 0 | 0            | 0 | 0           | 0 | 0           | 0 | 0            | 0 |
| 0 | 0            | 0 | 0           | 0 | 0           | 0 | 0.00869259   | 0 |
| 0 | -0.96771161  | 0 | 0           | 0 | 0           | 0 | 0            | 0 |
| 0 | 0            | 0 | 0           | 0 | 0           | 0 | 0            | 0 |
| 0 | 0            | 0 | 0           | 0 | 0           | 0 | 0            | 0 |
| 0 | 0            | 0 | 0           | 0 | 0           | 0 | 0.008514938  | 0 |
| 0 | 0.002806255  | 0 | 0           | 0 | 0           | 0 | 0            | 0 |
| 0 | 0            | 0 | 0           | 0 | 0           | 0 | 0.012364592  | 0 |
| 0 | 0.019865195  | 0 | 0           | 0 | 0           | 0 | 0            | 0 |
| 0 | 0.019837017  | 0 | 0           | 0 | 0           | 0 | 0.007111672  | 0 |
| 0 | 0            | 0 | 0           | 0 | 0           | 0 | 0            | 0 |
| 0 | 0            | 0 | 0           | 0 | 0           | 0 | 0.015099389  | 0 |
| 0 | 0            | 0 | 0           | 0 | 0           | 0 | 0.002165469  | 0 |
| 0 | 0.024946472  | 0 | 0           | 0 | 0           | 0 | 0.011212621  | 0 |
| 0 | 0            | 0 | 0           | 0 | 0           | 0 | 0.012647209  | 0 |
| 0 | 0.014753871  | 0 | 0           | 0 | 0           | 0 | 0            | 0 |
| 0 | 0            | 0 | 0           | 0 | 0           | 0 | 0.014121248  | 0 |
| 0 | 0.016883142  | 0 | 0           | 0 | 0           | 0 | 0.015123885  | 0 |
| 0 | 0            | 0 | 0           | 0 | 0           | 0 | 0.013872401  | 0 |
| 0 | 0            | 0 | 0           | 0 | 0           | 0 | 0            | 0 |
| 0 | 0.020153557  | 0 | 0           | 0 | 0           | 0 | 0.012645781  | 0 |
| 0 | 0            | 0 | 0           | 0 | 0           | 0 | 0.0132024    | 0 |
| 0 | 0.015871215  | 0 | 0           | 0 | 0           | 0 | 0.01352572   | 0 |
| 0 | 0.013039277  | 0 | 0           | 0 | 0           | 0 | 0            | 0 |
| 0 | 0            | 0 | 0           | 0 | 0           | 0 | 0.017225661  | 0 |
| 0 | 0            | 0 | 0           | 0 | 0           | 0 | 0.023162221  | 0 |
| 0 | -0.021425825 | 0 | 0           | 0 | 0           | 0 | 0.01600999   | 0 |
| 0 | -0.01953927  | 0 | 0           | 0 | 0           | 0 | 0            | 0 |
| 0 | 0            | 0 | 0           | 0 | 0           | 0 | 0.017477116  | 0 |
| 0 | 0            | 0 | 0           | 0 | 0           | 0 | 0            | 0 |
| 0 | 0            | 0 | 0           | 0 | 0           | 0 | 0.016560768  | 0 |
| 0 | 0.035410789  | 0 | 0           | 0 | 0           | 0 | 0.023916737  | 0 |
| 0 | 0            | 0 | 0           | 0 | 0           | 0 | 0.021506455  | 0 |
| 0 | -0.004635902 | 0 | 0           | 0 | 0           | 0 | 0.020500672  | 0 |
| 0 | 0.015099882  | 0 | 0           | 0 | 0           | 0 | 0.014959059  | 0 |
| 0 | -0.93725857  | 0 | 0           | 0 | -0.13220508 | 0 | 0            | 0 |
| 0 | 0            | 0 | 0           | 0 | 0           | 0 | 0.03575088   | 0 |
| 0 | -0.001030438 | 0 | 0           | 0 | 0           | 0 | 0.035046559  | 0 |
| 0 | -0.99793289  | 0 | 0           | 0 | -0.13552483 | 0 | 0            | 0 |
| 0 | -0.99670804  | 0 | 0           | 0 | -0.12831797 | 0 | 0            | 0 |
| 0 | -0.93711131  | 0 | -0.12475648 | 0 | 0           | 0 | 0            | 0 |
| 0 | -0.99498066  | 0 | 0           | 0 | -0.1256268  | 0 | -0.011699445 | 0 |
| 0 | -0.99651231  | 0 | 0           | 0 | -0.12645979 | 0 | 0            | 0 |
| 0 | -0.99651613  | 0 | 0.030821116 | 0 | -0.1559994  | 0 | 0            | 0 |
| 0 | -0.97833328  | 0 | 0           | 0 | -0.15928501 | 0 | 0            | 0 |

|   |              |   |             |   |             |   |              |   |
|---|--------------|---|-------------|---|-------------|---|--------------|---|
| 0 | -0.94108185  | 0 | 0           | 0 | -0.14065171 | 0 | 0            | 0 |
| 0 | -1.0005787   | 0 | 0.014770174 | 0 | -0.16529981 | 0 | 0            | 0 |
| 0 | -1.000778    | 0 | 0           | 0 | -0.15110794 | 0 | 0            | 0 |
| 0 | -1.0009104   | 0 | 0           | 0 | -0.1506104  | 0 | 0.001084303  | 0 |
| 0 | -1.0007795   | 0 | 0           | 0 | -0.15081402 | 0 | 0            | 0 |
| 0 | -0.96839858  | 0 | 0           | 0 | -0.1529427  | 0 | 0            | 0 |
| 0 | -0.96636703  | 0 | 0           | 0 | -0.15182686 | 0 | 0.00189591   | 0 |
| 0 | -0.96698296  | 0 | 0.006112579 | 0 | -0.15792951 | 0 | 0            | 0 |
| 0 | -0.96692938  | 0 | 0           | 0 | -0.1519607  | 0 | 0            | 0 |
| 0 | -0.99677307  | 0 | -0.12687194 | 0 | 0           | 0 | 0            | 0 |
| 0 | -0.99567144  | 0 | -0.12102421 | 0 | 0           | 0 | 0            | 0 |
| 0 | -0.99372613  | 0 | -0.11829585 | 0 | 0           | 0 | -0.012851823 | 0 |
| 0 | -0.99546262  | 0 | -0.11888238 | 0 | 0           | 0 | 0            | 0 |
| 0 | -0.94089738  | 0 | -0.13289583 | 0 | 0           | 0 | 0            | 0 |
| 0 | -1.0019674   | 0 | 0           | 0 | -0.14164716 | 0 | 0            | 0 |
| 0 | -1.0020153   | 0 | 0           | 0 | -0.13473278 | 0 | 0            | 0 |
| 0 | -0.97926147  | 0 | -0.15115429 | 0 | 0           | 0 | 0            | 0 |
| 0 | -1.0018184   | 0 | 0           | 0 | -0.14050424 | 0 | -0.005536467 | 0 |
| 0 | -1.0023909   | 0 | 0.015648624 | 0 | -0.15483958 | 0 | 0            | 0 |
| 0 | -0.080014481 | 0 | 0           | 0 | -0.1431277  | 0 | 0            | 0 |
| 0 | -1.0008161   | 0 | 0           | 0 | -0.13279782 | 0 | -0.011494561 | 0 |
| 0 | -1.0013757   | 0 | 0.013862496 | 0 | -0.14986295 | 0 | -0.008627807 | 0 |
| 0 | -1.0014731   | 0 | 0           | 0 | -0.13624831 | 0 | -0.008798695 | 0 |
| 0 | -0.093332595 | 0 | 0           | 0 | -0.1370188  | 0 | 0            | 0 |
| 0 | -1.0025383   | 0 | 0.016128398 | 0 | -0.14929817 | 0 | 0            | 0 |
| 0 | -1.0025636   | 0 | 0.016608698 | 0 | -0.14935002 | 0 | 0            | 0 |
| 0 | -1.0027196   | 0 | 0           | 0 | -0.13308696 | 0 | 0            | 0 |
| 0 | -0.99990069  | 0 | -0.14321436 | 0 | 0           | 0 | 0            | 0 |
| 0 | -0.99996749  | 0 | -0.14289763 | 0 | 0           | 0 | 0            | 0 |
| 0 | -1.0000386   | 0 | -0.14318842 | 0 | 0           | 0 | 0.00054019   | 0 |
| 0 | -0.098264753 | 0 | 0           | 0 | -0.13453995 | 0 | 0            | 0 |
| 0 | -0.10112522  | 0 | 0           | 0 | -0.13374426 | 0 | -0.009550299 | 0 |
| 0 | -0.098520428 | 0 | 0.027300364 | 0 | -0.16073009 | 0 | 0            | 0 |
| 0 | -0.99823216  | 0 | 0           | 0 | -0.11918552 | 0 | 0            | 0 |
| 0 | -0.96893198  | 0 | -0.14497447 | 0 | 0           | 0 | 0            | 0 |
| 0 | -0.96856179  | 0 | -0.14494953 | 0 | 0           | 0 | 0.001327922  | 0 |
| 0 | -0.96937779  | 0 | -0.14533197 | 0 | 0           | 0 | 0            | 0 |
| 0 | -0.94102147  | 0 | 0           | 0 | -0.11591725 | 0 | 0            | 0 |
| 0 | 0            | 0 | 0           | 0 | -0.14248434 | 0 | 0            | 0 |
| 0 | 0            | 0 | 0           | 0 | -0.13479775 | 0 | 0            | 0 |
| 0 | 0            | 0 | 0           | 0 | -0.13210181 | 0 | 0            | 0 |
| 0 | 0            | 0 | 0           | 0 | -0.13137858 | 0 | -0.008175949 | 0 |
| 0 | 0            | 0 | 0.026784275 | 0 | -0.15779085 | 0 | 0            | 0 |
| 0 | -1.0009046   | 0 | -0.12663571 | 0 | 0           | 0 | 0            | 0 |
| 0 | -1.0010914   | 0 | -0.1347432  | 0 | 0           | 0 | 0            | 0 |
| 0 | -0.99948417  | 0 | -0.12517909 | 0 | 0           | 0 | -0.012724783 | 0 |
| 0 | -1.0008558   | 0 | -0.13374775 | 0 | 0           | 0 | -0.006030561 | 0 |

|   |              |   |             |   |             |              |              |
|---|--------------|---|-------------|---|-------------|--------------|--------------|
| 0 | -1.0005546   | 0 | -0.13076935 | 0 | 0           | -0.008337569 | 0            |
| 0 | -1.0014871   | 0 | -0.1252239  | 0 | 0           | 0            | 0            |
| 0 | -0.076244988 | 0 | -0.13423627 | 0 | 0           | 0            | 0            |
| 0 | -0.087254118 | 0 | -0.12956333 | 0 | 0           | 0            | 0            |
| 0 | -0.94063244  | 0 | -0.1111704  | 0 | 0           | 0            | 0            |
| 0 | 0            | 0 | 0           | 0 | -0.14121763 | 0            | 0            |
| 0 | -0.99731617  | 0 | -0.1132263  | 0 | 0           | 0            | 0            |
| 0 | 0            | 0 | 0.016483117 | 0 | -0.156027   | 0            | 0            |
| 0 | -0.095496809 | 0 | -0.12618794 | 0 | 0           | -0.010844711 | 0            |
| 0 | 0            | 0 | 0           | 0 | -0.14000398 | 0            | -0.001420037 |
| 0 | 0            | 0 | 0           | 0 | -0.14003837 | 0            | 0            |
| 0 | -0.092162162 | 0 | -0.12679784 | 0 | 0           | 0            | 0            |
| 0 | -0.085695839 | 0 | 0           | 0 | -0.13297388 | 0            | 0            |
| 0 | -0.99950596  | 0 | 0           | 0 | -0.1089394  | 0            | -0.013811805 |
| 0 | -0.083626103 | 0 | 0           | 0 | -0.13390052 | 0            | -0.013770993 |
| 0 | -0.078062731 | 0 | 0           | 0 | -0.13555406 | 0            | 0            |
| 0 | 0            | 0 | 0           | 0 | -0.1271852  | 0            | 0            |
| 0 | 0            | 0 | -0.13373544 | 0 | 0           | 0            | 0            |
| 0 | -0.09515388  | 0 | 0           | 0 | -0.12866752 | 0            | -0.014367095 |
| 0 | -1.001679    | 0 | 0.016206177 | 0 | -0.12494216 | 0            | 0            |
| 0 | -0.079789903 | 0 | 0.029550143 | 0 | -0.16308427 | 0            | 0            |
| 0 | -0.080495013 | 0 | 0           | 0 | -0.13396592 | 0            | 0            |
| 0 | 0            | 0 | -0.12747752 | 0 | 0           | 0            | 0            |
| 0 | -0.098918307 | 0 | 0           | 0 | -0.12698332 | 0            | -0.013358152 |
| 0 | -1.0064491   | 0 | 0           | 0 | -0.14881037 | 0            | 0.02767245   |
| 0 | -0.099363088 | 0 | 0.031223732 | 0 | -0.15692718 | 0            | -0.013901713 |
| 0 | -0.091252425 | 0 | 0.030139744 | 0 | -0.15838162 | 0            | 0            |
| 0 | -0.095172805 | 0 | 0.034459584 | 0 | -0.16100872 | 0            | 0            |
| 0 | 0            | 0 | 0           | 0 | -0.14024423 | 0            | 0            |
| 0 | -0.94852117  | 0 | 0           | 0 | -0.1034201  | 0            | 0            |
| 0 | -0.94807751  | 0 | 0           | 0 | -0.10255121 | 0            | -0.010073719 |
| 0 | -1.0299349   | 0 | 0           | 0 | -0.14336848 | 0            | 0            |
| 0 | 0            | 0 | -0.1239385  | 0 | 0           | 0            | -0.009437443 |
| 0 | -0.9484234   | 0 | 0.017830434 | 0 | -0.12020991 | 0            | 0            |
| 0 | 0            | 0 | -0.1244869  | 0 | 0           | 0            | 0            |
| 0 | 0            | 0 | 0           | 0 | -0.13067493 | 0            | 0            |
| 0 | 0            | 0 | 0           | 0 | -0.14151012 | 0            | 0            |
| 0 | 0            | 0 | 0           | 0 | -0.141317   | 0            | -0.008500343 |
| 0 | 0            | 0 | 0.014267011 | 0 | -0.15579966 | 0            | 0            |
| 0 | 0.003274241  | 0 | 0           | 0 | -0.14184485 | 0            | 0            |
| 0 | 0            | 0 | 0           | 0 | -0.13482885 | 0            | 0            |
| 0 | -0.037543099 | 0 | 0           | 0 | -0.16221467 | 0            | 0.00756413   |
| 0 | -0.040434369 | 0 | 0           | 0 | -0.16130667 | 0            | 0            |
| 0 | 0            | 0 | 0           | 0 | -0.13320268 | 0            | -0.012186325 |
| 0 | -0.038248604 | 0 | 0.008261181 | 0 | -0.17060248 | 0            | 0            |
| 0 | -0.038305749 | 0 | 0           | 0 | -0.16253417 | 0            | 0            |
| 0 | 0            | 0 | 0           | 0 | -0.13978671 | 0            | -0.007772599 |

|   |              |   |              |   |             |   |              |   |
|---|--------------|---|--------------|---|-------------|---|--------------|---|
| 0 | 0            | 0 | 0            | 0 | -0.13935726 | 0 | -0.009456019 | 0 |
| 0 | -0.9983691   | 0 | -0.10423445  | 0 | 0           | 0 | -0.014712823 | 0 |
| 0 | 0            | 0 | 0.028110932  | 0 | -0.16092458 | 0 | 0            | 0 |
| 0 | 0            | 0 | 0.010993669  | 0 | -0.15064636 | 0 | -0.009559969 | 0 |
| 0 | 0            | 0 | 0            | 0 | -0.13977557 | 0 | 0            | 0 |
| 0 | 0.000430088  | 0 | 0            | 0 | -0.14001115 | 0 | -0.009517911 | 0 |
| 0 | 0            | 0 | 0.011879364  | 0 | -0.15171691 | 0 | 0            | 0 |
| 0 | 0            | 0 | 0            | 0 | -0.13335274 | 0 | 0            | 0 |
| 0 | 0            | 0 | -0.13279923  | 0 | 0           | 0 | 0            | 0 |
| 0 | 0            | 0 | 0.011191192  | 0 | -0.15085257 | 0 | 0            | 0 |
| 0 | 0.002212905  | 0 | 0            | 0 | -0.13997132 | 0 | 0            | 0 |
| 0 | 0.00356078   | 0 | 0.011892248  | 0 | -0.15205644 | 0 | 0            | 0 |
| 0 | 0            | 0 | 0            | 0 | -0.12624526 | 0 | -0.012932285 | 0 |
| 0 | 0            | 0 | 0.017654039  | 0 | -0.13799554 | 0 | 0            | 0 |
| 0 | 0            | 0 | 0            | 0 | -0.12095849 | 0 | 0.000468393  | 0 |
| 0 | 0            | 0 | -0.13185109  | 0 | 0           | 0 | -0.003110439 | 0 |
| 0 | 0            | 0 | -0.13175374  | 0 | 0           | 0 | 0            | 0 |
| 0 | 0            | 0 | 0            | 0 | -0.16016974 | 0 | 0.008017524  | 0 |
| 0 | 0            | 0 | 0            | 0 | -0.15960075 | 0 | 0            | 0 |
| 0 | 0            | 0 | 0.02930716   | 0 | -0.15509798 | 0 | 0            | 0 |
| 0 | 0            | 0 | 0.00776641   | 0 | -0.16809662 | 0 | 0            | 0 |
| 0 | 0            | 0 | 0            | 0 | -0.16057013 | 0 | 0            | 0 |
| 0 | 0            | 0 | 0            | 0 | -0.12435571 | 0 | -0.011898799 | 0 |
| 0 | -1.0036539   | 0 | 0            | 0 | -0.15056511 | 0 | 0            | 0 |
| 0 | 0            | 0 | 0.030859649  | 0 | -0.15393982 | 0 | -0.012456855 | 0 |
| 0 | 0            | 0 | 0.033930391  | 0 | -0.15780359 | 0 | 0            | 0 |
| 0 | 0            | 0 | 0.008624531  | 0 | -0.16541669 | 0 | 0.008723568  | 0 |
| 0 | -0.94745906  | 0 | -0.098181089 | 0 | 0           | 0 | -0.010971481 | 0 |
| 0 | 0            | 0 | 0            | 0 | -0.15719857 | 0 | 0.008615716  | 0 |
| 0 | 0            | 0 | 0            | 0 | -0.15679939 | 0 | 0.008473738  | 0 |
| 0 | -0.012004675 | 0 | 0            | 0 | -0.12649368 | 0 | 0            | 0 |
| 0 | -0.94791248  | 0 | -0.098838753 | 0 | 0           | 0 | 0            | 0 |
| 0 | -0.08003436  | 0 | -0.1249764   | 0 | 0           | 0 | 0            | 0 |
| 0 | 0            | 0 | 0            | 0 | -0.15658204 | 0 | 0            | 0 |
| 0 | 0            | 0 | 0.006935231  | 0 | -0.16354427 | 0 | 0            | 0 |
| 0 | 0            | 0 | 0.007332985  | 0 | -0.16463879 | 0 | 0            | 0 |
| 0 | -0.049535738 | 0 | 0.015667765  | 0 | -0.16756062 | 0 | 0            | 0 |
| 0 | -0.049037515 | 0 | 0.01589714   | 0 | -0.167968   | 0 | 0.00100424   | 0 |
| 0 | 0            | 0 | -0.12096053  | 0 | 0           | 0 | 0            | 0 |
| 0 | -0.049131102 | 0 | 0.015488553  | 0 | -0.16770272 | 0 | 0            | 0 |
| 0 | 0            | 0 | 0            | 0 | -0.12457706 | 0 | -0.004917787 | 0 |
| 0 | 0            | 0 | 0            | 0 | -0.12567687 | 0 | 0            | 0 |
| 0 | -0.049549447 | 0 | 0            | 0 | -0.15224741 | 0 | 0            | 0 |
| 0 | -0.049558426 | 0 | 0            | 0 | -0.15213706 | 0 | 0.000537403  | 0 |
| 0 | -0.049263923 | 0 | 0            | 0 | -0.15235654 | 0 | 0.000775882  | 0 |
| 0 | -1.0035827   | 0 | -0.013529725 | 0 | -0.14145739 | 0 | 0            | 0 |
| 0 | 0            | 0 | 0.015048345  | 0 | -0.1396151  | 0 | 0            | 0 |

|   |              |   |             |   |              |              |              |
|---|--------------|---|-------------|---|--------------|--------------|--------------|
| 0 | -0.080480204 | 0 | -0.12517198 | 0 | 0            | -0.015059729 | 0            |
| 0 | -0.089661924 | 0 | -0.12129336 | 0 | 0            | -0.015556771 | 0            |
| 0 | -1.0055241   | 0 | -0.14237059 | 0 | 0            | 0.025985835  | 0            |
| 0 | -1.0013156   | 0 | 0           | 0 | -0.097903171 | 0            | -0.012636072 |
| 0 | -0.074620981 | 0 | -0.12640603 | 0 | 0            | 0            | 0            |
| 0 | 0            | 0 | 0           | 0 | -0.1319007   | 0            | 0            |
| 0 | 0            | 0 | 0.024313316 | 0 | -0.13894415  | 0            | 0            |
| 0 | -0.093421497 | 0 | -0.11932805 | 0 | 0            | -0.014655945 | 0            |
| 0 | 0            | 0 | 0           | 0 | -0.11559683  | 0            | 0.002286934  |
| 0 | -1.0283394   | 0 | -0.13706727 | 0 | 0            | 0            | 0            |
| 0 | -0.077460588 | 0 | -0.12500231 | 0 | 0            | 0            | 0            |
| 0 | 0            | 0 | -0.1321593  | 0 | 0            | 0            | 0            |
| 0 | -1.0014126   | 0 | 0.020746791 | 0 | -0.11745569  | 0            | -0.01336833  |
| 0 | -1.003103    | 0 | 0.024110037 | 0 | -0.1216645   | 0            | 0            |
| 0 | 0            | 0 | 0.024767665 | 0 | -0.15681932  | 0            | 0            |
| 0 | 0            | 0 | 0           | 0 | -0.13254166  | 0            | -0.005179149 |
| 0 | 0            | 0 | 0.022997449 | 0 | -0.13749484  | 0            | 0.001760975  |
| 0 | 0            | 0 | 0.015954191 | 0 | -0.16524507  | 0            | 0            |
| 0 | 0            | 0 | 0.016191524 | 0 | -0.1650694   | 0            | 0.000711701  |
| 0 | 0            | 0 | 0.015997675 | 0 | -0.16501279  | 0            | 0            |
| 0 | 0            | 0 | 0           | 0 | -0.14970465  | 0            | 0            |
| 0 | 0            | 0 | 0           | 0 | -0.1495195   | 0            | 0.000711957  |
| 0 | 0            | 0 | 0           | 0 | -0.14922279  | 0            | 0.000472767  |
| 0 | 0            | 0 | 0           | 0 | -0.15404211  | 0            | 0.003848019  |
| 0 | 0            | 0 | 0.006019135 | 0 | -0.15925682  | 0            | 0.003379535  |
| 0 | 0            | 0 | 0           | 0 | -0.15338109  | 0            | 0.003329973  |
| 0 | 0            | 0 | 0           | 0 | -0.15439003  | 0            | 0            |
| 0 | 0            | 0 | 0.005585267 | 0 | -0.1596253   | 0            | 0            |
| 0 | 0            | 0 | 0.005386113 | 0 | -0.15891133  | 0            | 0            |
| 0 | 0            | 0 | 0.021866719 | 0 | -0.15238868  | 0            | -0.005972029 |
| 0 | 0            | 0 | 0           | 0 | -0.13141271  | 0            | -0.006139618 |
| 0 | 0            | 0 | 0.022893928 | 0 | -0.15391218  | 0            | 0            |
| 0 | 0.004898919  | 0 | 0           | 0 | -0.15502334  | 0            | 0            |
| 0 | 0.006539759  | 0 | 0           | 0 | -0.15460976  | 0            | 0.002302621  |
| 0 | 0.005960445  | 0 | 0           | 0 | -0.15396711  | 0            | 0.001871706  |
| 0 | 0.005836384  | 0 | 0.005488676 | 0 | -0.16003724  | 0            | 0            |
| 0 | 0.006398356  | 0 | 0.005703218 | 0 | -0.159605    | 0            | 0.001906245  |
| 0 | 0.005408953  | 0 | 0.005115394 | 0 | -0.15910727  | 0            | 0            |
| 0 | 0            | 0 | 0           | 0 | -0.15543143  | 0            | 0.001831344  |
| 0 | 0            | 0 | 0.004889286 | 0 | -0.16018631  | 0            | 0            |
| 0 | 0            | 0 | 0.005081061 | 0 | -0.15934066  | 0            | 0.000761307  |
| 0 | 0            | 0 | 0.005620766 | 0 | -0.16055676  | 0            | 0.000977793  |
| 0 | 0            | 0 | -0.12283485 | 0 | 0            | 0            | 0            |
| 0 | 0            | 0 | -0.13317636 | 0 | 0            | 0            | -0.010068977 |
| 0 | 0            | 0 | -0.13336516 | 0 | 0            | 0            | 0            |
| 0 | -1.0421402   | 0 | 0           | 0 | -0.13347718  | 0            | 0            |
| 0 | 0            | 0 | 0.016144187 | 0 | -0.15989931  | 0            | 0            |

|   |              |   |              |   |             |   |              |   |
|---|--------------|---|--------------|---|-------------|---|--------------|---|
| 0 | 0            | 0 | 0.016854567  | 0 | -0.16022022 | 0 | 0.0014381    | 0 |
| 0 | 0            | 0 | -0.11532495  | 0 | 0           | 0 | -0.001229711 | 0 |
| 0 | 0            | 0 | 0            | 0 | -0.14396245 | 0 | 0.001495838  | 0 |
| 0 | 0.003939407  | 0 | -0.13368071  | 0 | 0           | 0 | 0            | 0 |
| 0 | 0            | 0 | -0.13150991  | 0 | 0           | 0 | -0.010783788 | 0 |
| 0 | 0            | 0 | 0.017114799  | 0 | -0.15849201 | 0 | 6.11E-05     | 0 |
| 0 | 0            | 0 | -0.13203692  | 0 | 0           | 0 | -0.00912571  | 0 |
| 0 | 0            | 0 | -0.13189925  | 0 | 0           | 0 | 0            | 0 |
| 0 | 0.000593688  | 0 | -0.13226271  | 0 | 0           | 0 | -0.010872632 | 0 |
| 0 | 0            | 0 | -0.12460903  | 0 | 0           | 0 | -0.01345094  | 0 |
| 0 | 0            | 0 | 0.025591287  | 0 | -0.14454424 | 0 | 0            | 0 |
| 0 | 0            | 0 | -0.12583165  | 0 | 0           | 0 | 0            | 0 |
| 0 | 0.002361176  | 0 | -0.13209526  | 0 | 0           | 0 | 0            | 0 |
| 0 | 0            | 0 | 0            | 0 | -0.11949762 | 0 | -0.002560514 | 0 |
| 0 | -1.0030817   | 0 | -0.14411463  | 0 | 0           | 0 | 0            | 0 |
| 0 | -1.0109729   | 0 | 0            | 0 | -0.14039402 | 0 | 0.031500733  | 0 |
| 0 | 0            | 0 | -0.11901839  | 0 | 0           | 0 | -0.01408712  | 0 |
| 0 | 0            | 0 | -0.12452778  | 0 | 0           | 0 | 0            | 0 |
| 0 | -0.010709499 | 0 | -0.12051767  | 0 | 0           | 0 | 0            | 0 |
| 0 | -1.0001071   | 0 | -0.093339732 | 0 | 0           | 0 | -0.013561927 | 0 |
| 0 | 0            | 0 | -0.11872137  | 0 | 0           | 0 | -0.006424681 | 0 |
| 0 | -0.036267595 | 0 | -0.15274297  | 0 | 0           | 0 | 0            | 0 |
| 0 | -1.0079462   | 0 | 0            | 0 | -0.13554131 | 0 | 0.023425263  | 0 |
| 0 | 0            | 0 | -0.11972683  | 0 | 0           | 0 | 0            | 0 |
| 0 | -0.032643647 | 0 | -0.15395543  | 0 | 0           | 0 | 0.006424932  | 0 |
| 0 | 0            | 0 | -0.11683425  | 0 | 0           | 0 | -0.013158144 | 0 |
| 0 | -0.033712966 | 0 | -0.15419606  | 0 | 0           | 0 | 0            | 0 |
| 0 | -1.0146349   | 0 | 0            | 0 | -0.12695531 | 0 | 0.014852057  | 0 |
| 0 | 0            | 0 | 0            | 0 | -0.13108164 | 0 | -0.011549963 | 0 |
| 0 | -1.0079551   | 0 | -0.003890238 | 0 | -0.12594898 | 0 | 0.018265586  | 0 |
| 0 | -1.0259957   | 0 | 0            | 0 | -0.13138845 | 0 | 0            | 0 |
| 0 | 0            | 0 | -0.15114039  | 0 | 0           | 0 | 0            | 0 |
| 0 | 0            | 0 | -0.15201812  | 0 | 0           | 0 | 0.006890759  | 0 |
| 0 | 0            | 0 | 0            | 0 | -0.13156724 | 0 | 0            | 0 |
| 0 | 0            | 0 | 0.020089487  | 0 | -0.15115885 | 0 | 0            | 0 |
| 0 | -0.001186784 | 0 | 0            | 0 | -0.13174235 | 0 | 0            | 0 |
| 0 | 0            | 0 | -0.15233546  | 0 | 0           | 0 | 0            | 0 |
| 0 | 0            | 0 | -0.10975644  | 0 | 0           | 0 | 0.00050691   | 0 |
| 0 | 0            | 0 | -0.1488659   | 0 | 0           | 0 | 0.006806076  | 0 |
| 0 | 0            | 0 | -0.14967477  | 0 | 0           | 0 | 0.007393767  | 0 |
| 0 | -1.0209331   | 0 | -0.004344753 | 0 | -0.12318906 | 0 | 0            | 0 |
| 0 | 0            | 0 | -0.14876036  | 0 | 0           | 0 | 0            | 0 |
| 0 | 0            | 0 | 0            | 0 | -0.13236734 | 0 | -0.011220999 | 0 |
| 0 | -1.0570366   | 0 | 0            | 0 | -0.13653199 | 0 | 0.029988896  | 0 |
| 0 | -0.045038965 | 0 | -0.14400541  | 0 | 0           | 0 | 0            | 0 |
| 0 | -0.045138966 | 0 | -0.14395221  | 0 | 0           | 0 | -0.000572358 | 0 |
| 0 | 0            | 0 | 0.01899527   | 0 | -0.15100555 | 0 | -0.013181988 | 0 |



|   |              |   |              |   |             |            |              |
|---|--------------|---|--------------|---|-------------|------------|--------------|
| 0 | -0.04398726  | 0 | -0.14474192  | 0 | 0           | 0.00024361 | 0            |
| 0 | -0.010402126 | 0 | 0            | 0 | -0.11564417 | 0          | -0.012010495 |
| 0 | 0.000843417  | 0 | 0            | 0 | -0.13258788 | 0          | -0.01311162  |
| 0 | 0            | 0 | 0            | 0 | -0.14069686 | 0          | -0.004300626 |
| 0 | 0            | 0 | 0.014700355  | 0 | -0.1544836  | 0          | 0            |
| 0 | 0            | 0 | -0.12348533  | 0 | 0           | 0          | 0            |
| 0 | 0            | 0 | 0.020464321  | 0 | -0.15272199 | 0          | 0            |
| 0 | 0            | 0 | 0.013000104  | 0 | -0.15451309 | 0          | -0.005593449 |
| 0 | 0            | 0 | 0            | 0 | -0.11503783 | 0          | -0.010298578 |
| 0 | 0            | 0 | 0.010369848  | 0 | -0.12480967 | 0          | -0.009513204 |
| 0 | 0.001178718  | 0 | 0            | 0 | -0.1416603  | 0          | -0.005559814 |
| 0 | 0.002621732  | 0 | 0.014344595  | 0 | -0.15492411 | 0          | 0            |
| 0 | 0            | 0 | 0.0152454    | 0 | -0.15393816 | 0          | -0.005992105 |
| 0 | -0.006451164 | 0 | 0.01111312   | 0 | -0.12683829 | 0          | 0            |
| 0 | 0            | 0 | -0.12412697  | 0 | 0           | 0          | -0.006851979 |
| 0 | 0.005176861  | 0 | 0.020533528  | 0 | -0.153094   | 0          | 0            |
| 0 | 0            | 0 | 0.011244798  | 0 | -0.12629332 | 0          | 0            |
| 0 | -1.0056206   | 0 | -0.014097012 | 0 | -0.12451982 | 0          | 0            |
| 0 | 0.003468589  | 0 | 0.014771376  | 0 | -0.1542437  | 0          | -0.007485962 |
| 0 | 0            | 0 | 0.016659774  | 0 | -0.14703591 | 0          | -0.012370254 |
| 0 | 0            | 0 | 0            | 0 | -0.13063589 | 0          | -0.012570167 |
| 0 | 0            | 0 | 0.023373927  | 0 | -0.1359999  | 0          | -0.004016927 |
| 0 | 0            | 0 | 0.01608277   | 0 | -0.14627124 | 0          | -0.014357957 |
| 0 | 0            | 0 | 0.01469084   | 0 | -0.14917907 | 0          | -0.009230039 |
| 0 | 0.000769916  | 0 | 0.016506738  | 0 | -0.14711142 | 0          | -0.014259582 |
| 0 | -0.000209871 | 0 | 0            | 0 | -0.13070174 | 0          | -0.014505563 |
| 0 | 0            | 0 | -0.12313005  | 0 | 0           | 0          | -0.007682301 |
| 0 | 0.001761736  | 0 | 0.014046327  | 0 | -0.1494452  | 0          | -0.010552136 |
| 0 | -1.0399367   | 0 | -0.1272901   | 0 | 0           | 0          | 0            |
| 0 | 0            | 0 | 0.017751692  | 0 | -0.14840071 | 0          | 0            |
| 0 | 0            | 0 | -0.14156549  | 0 | 0           | 0          | 0            |
| 0 | 0            | 0 | -0.14171125  | 0 | 0           | 0          | -3.84E-05    |
| 0 | 0            | 0 | -0.14143246  | 0 | 0           | 0          | -0.000370957 |
| 0 | 0            | 0 | -0.14639765  | 0 | 0           | 0          | 0.002773162  |
| 0 | 0            | 0 | -0.14644719  | 0 | 0           | 0          | 0.002707057  |
| 0 | 0            | 0 | -0.14681532  | 0 | 0           | 0          | 0            |
| 0 | 0.004759427  | 0 | 0.017656844  | 0 | -0.14845669 | 0          | 0            |
| 0 | -1.007062    | 0 | -0.13037259  | 0 | 0           | 0          | 0.021665312  |
| 0 | 0.005601675  | 0 | -0.14743918  | 0 | 0           | 0          | 0            |
| 0 | 0.0061822    | 0 | -0.14699498  | 0 | 0           | 0          | 0.001306614  |
| 0 | 0.006964649  | 0 | -0.14701425  | 0 | 0           | 0          | 0.001144775  |
| 0 | 0            | 0 | -0.11308806  | 0 | 0           | 0          | -0.004329889 |
| 0 | -0.013461122 | 0 | 0            | 0 | -0.11776538 | 0          | -0.013040612 |
| 0 | 0            | 0 | -0.14789798  | 0 | 0           | 0          | 0.000608023  |
| 0 | -1.0099332   | 0 | -0.13398963  | 0 | 0           | 0          | 0.029386593  |
| 0 | -1.0142554   | 0 | -0.12263859  | 0 | 0           | 0          | 0.013790718  |
| 0 | -1.008228    | 0 | -0.010739423 | 0 | -0.13213443 | 0          | 0            |

|   |              |   |              |   |             |   |              |   |
|---|--------------|---|--------------|---|-------------|---|--------------|---|
| 0 | 0            | 0 | 0.020147919  | 0 | -0.13600827 | 0 | -0.009822866 | 0 |
| 0 | 0            | 0 | 0            | 0 | -0.1170023  | 0 | -0.011248912 | 0 |
| 0 | 0            | 0 | 0.029554316  | 0 | -0.13780528 | 0 | -0.001989698 | 0 |
| 0 | -1.024346    | 0 | -0.12646631  | 0 | 0           | 0 | 0            | 0 |
| 0 | -0.009249543 | 0 | 0.021225622  | 0 | -0.13888297 | 0 | 0            | 0 |
| 0 | 0            | 0 | -0.13683905  | 0 | 0           | 0 | 0.000430372  | 0 |
| 0 | 0            | 0 | 0.021270787  | 0 | -0.13808987 | 0 | 0            | 0 |
| 0 | -0.009878288 | 0 | -0.11094376  | 0 | 0           | 0 | -0.013003265 | 0 |
| 0 | 0            | 0 | -0.12308033  | 0 | 0           | 0 | -0.01287793  | 0 |
| 0 | -1.0736804   | 0 | 0.007547743  | 0 | -0.14287884 | 0 | 0            | 0 |
| 0 | 0            | 0 | -0.11033932  | 0 | 0           | 0 | -0.011286809 | 0 |
| 0 | 0            | 0 | -0.12348511  | 0 | 0           | 0 | 0            | 0 |
| 0 | -0.00085228  | 0 | -0.12364912  | 0 | 0           | 0 | 0            | 0 |
| 0 | 0            | 0 | -0.12432922  | 0 | 0           | 0 | -0.012606982 | 0 |
| 0 | -1.0561172   | 0 | -0.12974401  | 0 | 0           | 0 | 0.028459761  | 0 |
| 0 | 0.001003137  | 0 | -0.12455187  | 0 | 0           | 0 | -0.01449819  | 0 |
| 0 | 0            | 0 | -0.13390497  | 0 | 0           | 0 | -0.00486489  | 0 |
| 0 | 0            | 0 | -0.12285859  | 0 | 0           | 0 | -0.013843212 | 0 |
| 0 | 0.001848266  | 0 | -0.13487104  | 0 | 0           | 0 | -0.006135565 | 0 |
| 0 | -0.000519434 | 0 | -0.1229419   | 0 | 0           | 0 | -0.015779813 | 0 |
| 0 | -0.012614174 | 0 | -0.11183535  | 0 | 0           | 0 | -0.014240113 | 0 |
| 0 | 0            | 0 | -0.11108574  | 0 | 0           | 0 | -0.012441061 | 0 |
| 0 | -0.067677195 | 0 | 0            | 0 | -0.14643925 | 0 | 0.02121991   | 0 |
| 0 | 0            | 0 | 0.018890223  | 0 | -0.12084963 | 0 | -0.010436446 | 0 |
| 0 | 0            | 0 | 0            | 0 | -0.1023025  | 0 | -0.009534681 | 0 |
| 0 | -0.003012502 | 0 | 0            | 0 | -0.10268322 | 0 | -0.011277824 | 0 |
| 0 | -0.066043426 | 0 | 0            | 0 | -0.14927503 | 0 | 0.025643078  | 0 |
| 0 | -0.064179911 | 0 | 0.000886703  | 0 | -0.15142696 | 0 | 0.027055915  | 0 |
| 0 | 0            | 0 | 0.020018178  | 0 | -0.1220984  | 0 | 0            | 0 |
| 0 | 0            | 0 | 0.017247323  | 0 | -0.11853213 | 0 | -0.010202747 | 0 |
| 0 | -0.0030082   | 0 | 0.017047796  | 0 | -0.11871362 | 0 | -0.011952157 | 0 |
| 0 | 0.000665178  | 0 | 0.020022413  | 0 | -0.12255317 | 0 | 0            | 0 |
| 0 | -0.009297486 | 0 | 0.015618692  | 0 | -0.12285441 | 0 | -0.016546439 | 0 |
| 0 | 0            | 0 | 0.015927664  | 0 | -0.12251821 | 0 | -0.014690472 | 0 |
| 0 | -0.073663112 | 0 | 0            | 0 | -0.14513414 | 0 | 0            | 0 |
| 0 | -0.071895609 | 0 | 0.000995077  | 0 | -0.14726839 | 0 | 0            | 0 |
| 0 | 0            | 0 | 0            | 0 | -0.14382318 | 0 | 0.022268056  | 0 |
| 0 | 0            | 0 | 0            | 0 | -0.14664674 | 0 | 0.026455633  | 0 |
| 0 | 0            | 0 | 0.001013883  | 0 | -0.14838944 | 0 | 0.027294921  | 0 |
| 0 | -1.0189902   | 0 | -0.004240664 | 0 | -0.14872205 | 0 | 0.064312488  | 0 |
| 0 | -0.071344082 | 0 | -0.00903955  | 0 | -0.14277642 | 0 | 0            | 0 |
| 0 | 0            | 0 | -0.097762867 | 0 | 0           | 0 | -0.010529377 | 0 |
| 0 | -0.002671738 | 0 | -0.098142631 | 0 | 0           | 0 | -0.01227588  | 0 |
| 0 | 0            | 0 | 0            | 0 | -0.14277313 | 0 | 0            | 0 |
| 0 | 0            | 0 | 0.000299177  | 0 | -0.14395815 | 0 | 0            | 0 |
| 0 | -0.062372023 | 0 | -0.13977442  | 0 | 0           | 0 | 0.019595207  | 0 |
| 0 | -0.061383952 | 0 | -0.14232791  | 0 | 0           | 0 | 0.023509591  | 0 |

|   |              |   |              |   |             |   |              |   |
|---|--------------|---|--------------|---|-------------|---|--------------|---|
| 0 | 0            | 0 | 0            | 0 | -0.13555235 | 0 | 0.02662068   | 0 |
| 0 | 0            | 0 | -0.009423997 | 0 | -0.13985969 | 0 | 0            | 0 |
| 0 | 0            | 0 | 0.003240811  | 0 | -0.13718286 | 0 | 0.025688131  | 0 |
| 0 | 0            | 0 | 0.000846502  | 0 | -0.13854785 | 0 | 0.02943636   | 0 |
| 0 | -0.082395185 | 0 | 0            | 0 | -0.13681916 | 0 | 0.021190316  | 0 |
| 0 | -0.068549282 | 0 | -0.1385569   | 0 | 0           | 0 | 0            | 0 |
| 0 | 0            | 0 | -0.13728989  | 0 | 0           | 0 | 0.020668665  | 0 |
| 0 | 0            | 0 | 0.02390456   | 0 | -0.11920933 | 0 | -0.013429827 | 0 |
| 0 | -0.002519945 | 0 | 0.023721405  | 0 | -0.11942395 | 0 | -0.015302604 | 0 |
| 0 | 0            | 0 | -0.13982164  | 0 | 0           | 0 | 0.024364084  | 0 |
| 0 | -0.079781853 | 0 | 0.002955858  | 0 | -0.14463751 | 0 | 0.030207979  | 0 |
| 0 | -0.087922749 | 0 | 0.005763773  | 0 | -0.14144165 | 0 | 0            | 0 |
| 0 | -1.0421432   | 0 | 0            | 0 | -0.10648465 | 0 | 0.017865651  | 0 |
| 0 | 0            | 0 | -0.002197011 | 0 | -0.13114218 | 0 | 0            | 0 |
| 0 | 0            | 0 | -0.13635117  | 0 | 0           | 0 | 0            | 0 |
| 0 | 0            | 0 | 0            | 0 | -0.13410425 | 0 | 0.022584472  | 0 |
| 0 | -1.0482734   | 0 | -0.000567249 | 0 | -0.10538255 | 0 | 0            | 0 |
| 0 | 0            | 0 | -0.12985116  | 0 | 0           | 0 | 0.024463523  | 0 |
| 0 | 0            | 0 | 0.002964982  | 0 | -0.1417571  | 0 | 0.031167384  | 0 |
| 0 | -1.0172362   | 0 | -0.005754057 | 0 | -0.1069304  | 0 | 0.02893516   | 0 |
| 0 | -0.077446368 | 0 | -0.13019125  | 0 | 0           | 0 | 0.019375115  | 0 |
| 0 | -1.0405846   | 0 | -0.10276896  | 0 | 0           | 0 | 0.016565063  | 0 |
| 0 | 0            | 0 | 0            | 0 | -0.13212396 | 0 | 0.020333365  | 0 |
| 0 | -0.003069959 | 0 | 0            | 0 | -0.13298708 | 0 | 0.018758678  | 0 |
| 0 | 0            | 0 | -0.002129314 | 0 | -0.13059068 | 0 | 0.019347635  | 0 |
| 0 | 0            | 0 | -0.00392271  | 0 | -0.13020584 | 0 | 0.022898013  | 0 |
| 0 | -0.002480454 | 0 | -0.004499507 | 0 | -0.13063931 | 0 | 0.021516746  | 0 |
| 0 | 0            | 0 | 0.005185959  | 0 | -0.13809469 | 0 | 0            | 0 |
| 0 | 0            | 0 | -0.002364505 | 0 | -0.12519773 | 0 | 0.016925969  | 0 |
| 0 | -0.002179488 | 0 | -0.002808511 | 0 | -0.12554315 | 0 | 0.01529369   | 0 |
| 0 | -0.076955592 | 0 | 0.01289184   | 0 | -0.15175257 | 0 | 0.031592498  | 0 |
| 0 | -1.062139    | 0 | 0.005461973  | 0 | -0.11423174 | 0 | 0.026355483  | 0 |
| 0 | -0.008788065 | 0 | -0.005771173 | 0 | -0.12674305 | 0 | 0            | 0 |
| 0 | 0            | 0 | -0.005643259 | 0 | -0.12594988 | 0 | 0            | 0 |
| 0 | 0            | 0 | -0.12761037  | 0 | 0           | 0 | 0.020799578  | 0 |
| 0 | -0.92899284  | 0 | 0            | 0 | 0           | 0 | 0            | 0 |
| 0 | 0            | 0 | -0.12695885  | 0 | 0           | 0 | 0.018708608  | 0 |
| 0 | -0.002433804 | 0 | -0.12781507  | 0 | 0           | 0 | 0.017124698  | 0 |
| 0 | 0            | 0 | 0.012540596  | 0 | -0.14858431 | 0 | 0.03287451   | 0 |
| 0 | 0            | 0 | 0.008297447  | 0 | -0.12939051 | 0 | 0.028614309  | 0 |
| 0 | -0.96168269  | 0 | 0            | 0 | 0           | 0 | -0.015803929 | 0 |
| 0 | -0.9638952   | 0 | 0            | 0 | 0           | 0 | 0            | 0 |
| 0 | -0.92699744  | 0 | 0            | 0 | 0           | 0 | -0.013643276 | 0 |
| 0 | -0.96396536  | 0 | 0            | 0 | 0           | 0 | 0            | 0 |
| 0 | -0.92749167  | 0 | 0            | 0 | 0           | 0 | 0            | 0 |
| 0 | -0.92757862  | 0 | 0            | 0 | 0           | 0 | 0            | 0 |
| 0 | -0.9598299   | 0 | 0            | 0 | 0           | 0 | -0.015210299 | 0 |



|   |              |   |             |   |             |              |              |
|---|--------------|---|-------------|---|-------------|--------------|--------------|
| 0 | 0.00523723   | 0 | 0           | 0 | 0           | -0.015487017 | 0            |
| 0 | 0            | 0 | 0           | 0 | 0           | -0.015784208 | 0            |
| 0 | -0.003402996 | 0 | 0           | 0 | 0           | -0.017566697 | 0            |
| 0 | -0.99715427  | 0 | 0           | 0 | 0           | 0            | 0            |
| 0 | -0.99756844  | 0 | 0           | 0 | 0           | 0.00751341   | 0            |
| 0 | -1.0014039   | 0 | 0           | 0 | 0           | 0            | 0            |
| 0 | -0.96683866  | 0 | 0           | 0 | 0           | 0.013166605  | 0            |
| 0 | -1.0065329   | 0 | 0           | 0 | 0           | 0.012519981  | 0            |
| 0 | -1.0070597   | 0 | 0           | 0 | 0           | 0.01262852   | 0            |
| 0 | -1.0098671   | 0 | 0           | 0 | 0           | 0            | 0            |
| 0 | -0.96593819  | 0 | 0           | 0 | 0           | 0.015860565  | 0            |
| 0 | -0.96469582  | 0 | 0           | 0 | 0           | 0            | 0            |
| 0 | -1.02828     | 0 | 0           | 0 | 0           | 0.015660244  | 0            |
| 0 | -1.0287988   | 0 | 0           | 0 | 0           | 0            | 0            |
| 0 | -1.0224003   | 0 | 0           | 0 | 0           | 0.014774749  | 0            |
| 0 | -1.0291923   | 0 | 0           | 0 | 0           | 0.019453394  | 0            |
| 0 | -0.964714    | 0 | 0           | 0 | 0           | 0.023963801  | 0            |
| 0 | -0.97222914  | 0 | 0           | 0 | 0           | 0.036259711  | 0            |
| 0 | 0            | 0 | 0           | 0 | 0           | 0.007445553  | 0            |
| 0 | 0            | 0 | 0           | 0 | 0           | 0            | 0            |
| 0 | 0            | 0 | 0           | 0 | 0           | 0.009421913  | 0            |
| 0 | 0            | 0 | 0           | 0 | 0           | 0.00727973   | 0            |
| 0 | 0.002540143  | 0 | 0           | 0 | 0           | 0            | 0            |
| 0 | 0.004011838  | 0 | 0           | 0 | 0           | 0.008699719  | 0            |
| 0 | 0.021462753  | 0 | 0           | 0 | 0           | 0.006038004  | 0            |
| 0 | 0            | 0 | 0           | 0 | 0           | 0.012821021  | 0            |
| 0 | 0.014944147  | 0 | 0           | 0 | 0           | 0.012724285  | 0            |
| 0 | 0            | 0 | 0           | 0 | 0           | 0.013887174  | 0            |
| 0 | 0.014018125  | 0 | 0           | 0 | 0           | 0.013541275  | 0            |
| 0 | -0.015231354 | 0 | 0           | 0 | 0           | 0.015776017  | 0            |
| 0 | 0            | 0 | 0           | 0 | 0           | 0.017193955  | 0            |
| 0 | -0.93640238  | 0 | 0           | 0 | -0.1428634  | 0            | 0            |
| 0 | -0.93506818  | 0 | 0           | 0 | -0.13514178 | 0            | 0            |
| 0 | -0.93730518  | 0 | 0           | 0 | -0.13254174 | 0            | 0            |
| 0 | -0.93695049  | 0 | 0           | 0 | -0.13182738 | 0            | -0.007958542 |
| 0 | -0.93711998  | 0 | 0.026297658 | 0 | -0.15775662 | 0            | 0            |
| 0 | -0.99503429  | 0 | 0           | 0 | -0.13229334 | 0            | 0            |
| 0 | -0.99740968  | 0 | 0           | 0 | -0.13661292 | 0            | 0            |
| 0 | -0.93636891  | 0 | -0.13413418 | 0 | 0           | 0            | 0            |
| 0 | -0.99599859  | 0 | 0           | 0 | -0.13504288 | 0            | -0.011205897 |
| 0 | -0.9975105   | 0 | 0.026641059 | 0 | -0.16130336 | 0            | 0            |
| 0 | -0.93493422  | 0 | -0.12783864 | 0 | 0           | 0            | 0            |
| 0 | -0.99777647  | 0 | 0           | 0 | -0.1351835  | 0            | 0            |
| 0 | -0.99465112  | 0 | 0           | 0 | -0.1279447  | 0            | -0.011958647 |
| 0 | -0.99628588  | 0 | 0.027902963 | 0 | -0.15540679 | 0            | 0            |
| 0 | -0.9367631   | 0 | -0.12440145 | 0 | 0           | 0            | -0.009222993 |
| 0 | -0.93714244  | 0 | -0.1249424  | 0 | 0           | 0            | 0            |

|   |              |   |             |   |             |   |              |   |
|---|--------------|---|-------------|---|-------------|---|--------------|---|
| 0 | -0.99466908  | 0 | 0           | 0 | -0.12605905 | 0 | -0.010938737 | 0 |
| 0 | -0.99456214  | 0 | 0.029556602 | 0 | -0.15438214 | 0 | -0.011493374 | 0 |
| 0 | -0.99600113  | 0 | 0.032483869 | 0 | -0.15806716 | 0 | 0            | 0 |
| 0 | -0.94099287  | 0 | 0           | 0 | -0.14191588 | 0 | 0            | 0 |
| 0 | -0.97673963  | 0 | 0           | 0 | -0.15896532 | 0 | 0.006855019  | 0 |
| 0 | -0.97731505  | 0 | 0           | 0 | -0.15862388 | 0 | 0            | 0 |
| 0 | -0.97842026  | 0 | 0.008582137 | 0 | -0.16762854 | 0 | 0            | 0 |
| 0 | -0.9783418   | 0 | 0           | 0 | -0.15931369 | 0 | 0            | 0 |
| 0 | -0.94079388  | 0 | 0           | 0 | -0.14020655 | 0 | -0.007558196 | 0 |
| 0 | -0.9406186   | 0 | 0           | 0 | -0.14024494 | 0 | 0            | 0 |
| 0 | -0.94103779  | 0 | 0.011520909 | 0 | -0.15177561 | 0 | 0            | 0 |
| 0 | -1.0007446   | 0 | 0.015132965 | 0 | -0.16541497 | 0 | 0.001311069  | 0 |
| 0 | -1.0005808   | 0 | 0.014730409 | 0 | -0.16554969 | 0 | 0            | 0 |
| 0 | -1.0005872   | 0 | 0.014802722 | 0 | -0.16534422 | 0 | 0            | 0 |
| 0 | -1.0009563   | 0 | 0           | 0 | -0.15094788 | 0 | 0.001363468  | 0 |
| 0 | -1.0007528   | 0 | 0           | 0 | -0.15118381 | 0 | 0            | 0 |
| 0 | -1.0009202   | 0 | 0           | 0 | -0.15061428 | 0 | 0.001083942  | 0 |
| 0 | -0.93653947  | 0 | 0           | 0 | -0.12604624 | 0 | 0            | 0 |
| 0 | -0.99409346  | 0 | -0.12448241 | 0 | 0           | 0 | 0            | 0 |
| 0 | -0.96920137  | 0 | 0           | 0 | -0.15325408 | 0 | 0            | 0 |
| 0 | -0.96778798  | 0 | 0           | 0 | -0.15283325 | 0 | 0.002740054  | 0 |
| 0 | -0.96845898  | 0 | 0.006346777 | 0 | -0.15911077 | 0 | 0            | 0 |
| 0 | -0.96636976  | 0 | 0.006441191 | 0 | -0.15807484 | 0 | 0.001957934  | 0 |
| 0 | -0.96635317  | 0 | 0           | 0 | -0.15179014 | 0 | 0.001903382  | 0 |
| 0 | -0.96697903  | 0 | 0.006034347 | 0 | -0.15782282 | 0 | 0            | 0 |
| 0 | -0.99464725  | 0 | -0.12646589 | 0 | 0           | 0 | -0.012485957 | 0 |
| 0 | -0.99628812  | 0 | -0.12764557 | 0 | 0           | 0 | 0            | 0 |
| 0 | -0.99652935  | 0 | -0.12638096 | 0 | 0           | 0 | 0            | 0 |
| 0 | -0.99344297  | 0 | -0.12073532 | 0 | 0           | 0 | -0.013127949 | 0 |
| 0 | -0.9934344   | 0 | -0.11855465 | 0 | 0           | 0 | -0.01221351  | 0 |
| 0 | -0.08800667  | 0 | 0           | 0 | -0.14100959 | 0 | 0            | 0 |
| 0 | -0.94080888  | 0 | -0.13378051 | 0 | 0           | 0 | 0            | 0 |
| 0 | -1.0002099   | 0 | 0           | 0 | -0.13342217 | 0 | 0            | 0 |
| 0 | -0.94056262  | 0 | -0.13246425 | 0 | 0           | 0 | -0.008915255 | 0 |
| 0 | -0.94020439  | 0 | -0.13236901 | 0 | 0           | 0 | 0            | 0 |
| 0 | -1.0002769   | 0 | 0           | 0 | -0.13422851 | 0 | -0.010248891 | 0 |
| 0 | -1.0015013   | 0 | 0           | 0 | -0.14215083 | 0 | -0.003645182 | 0 |
| 0 | -1.0017956   | 0 | 0.013522879 | 0 | -0.15487662 | 0 | 0            | 0 |
| 0 | -1.0017281   | 0 | 0.019072316 | 0 | -0.15319102 | 0 | 0            | 0 |
| 0 | -0.97794149  | 0 | -0.15082427 | 0 | 0           | 0 | 0.005737395  | 0 |
| 0 | -0.97759819  | 0 | -0.15014753 | 0 | 0           | 0 | 0            | 0 |
| 0 | -0.078953379 | 0 | 0           | 0 | -0.1440252  | 0 | 0            | 0 |
| 0 | -0.97922329  | 0 | -0.15107763 | 0 | 0           | 0 | 0            | 0 |
| 0 | -1.0016571   | 0 | 0.014192815 | 0 | -0.15438704 | 0 | -0.005324917 | 0 |
| 0 | -0.082875628 | 0 | 0           | 0 | -0.14259479 | 0 | -0.009022436 | 0 |
| 0 | -0.081882649 | 0 | 0           | 0 | -0.14240368 | 0 | 0            | 0 |
| 0 | -0.080440892 | 0 | 0.02341705  | 0 | -0.16575682 | 0 | 0            | 0 |

|   |              |   |             |   |             |   |              |   |
|---|--------------|---|-------------|---|-------------|---|--------------|---|
| 0 | -1.0006084   | 0 | 0.015411308 | 0 | -0.14770547 | 0 | -0.011391962 | 0 |
| 0 | -1.000695    | 0 | 0           | 0 | -0.13254555 | 0 | -0.011573388 | 0 |
| 0 | -0.93638389  | 0 | -0.12010553 | 0 | 0           | 0 | 0            | 0 |
| 0 | -0.096172106 | 0 | 0           | 0 | -0.13656539 | 0 | -0.009735662 | 0 |
| 0 | -1.0013226   | 0 | 0.013662667 | 0 | -0.1496098  | 0 | -0.008603767 | 0 |
| 0 | -0.093600681 | 0 | 0.023818645 | 0 | -0.16011208 | 0 | 0            | 0 |
| 0 | -1.0024795   | 0 | 0.016427376 | 0 | -0.14898509 | 0 | 0            | 0 |
| 0 | -0.99991992  | 0 | -0.14305986 | 0 | 0           | 0 | 0            | 0 |
| 0 | -0.99997052  | 0 | -0.14310725 | 0 | 0           | 0 | 0.000554321  | 0 |
| 0 | -0.99999993  | 0 | -0.14286398 | 0 | 0           | 0 | 0.000260559  | 0 |
| 0 | -0.10088931  | 0 | 0           | 0 | -0.13408847 | 0 | -0.008902537 | 0 |
| 0 | -0.098482182 | 0 | 0.028792755 | 0 | -0.16252435 | 0 | 0            | 0 |
| 0 | -0.10127597  | 0 | 0.026360239 | 0 | -0.15936399 | 0 | -0.009381585 | 0 |
| 0 | 0            | 0 | 0           | 0 | -0.13894884 | 0 | 0            | 0 |
| 0 | -0.99651415  | 0 | 0           | 0 | -0.11874664 | 0 | -0.010295722 | 0 |
| 0 | 0            | 0 | 0           | 0 | -0.14341511 | 0 | 0            | 0 |
| 0 | -0.94059834  | 0 | 0           | 0 | -0.11553811 | 0 | -0.010064235 | 0 |
| 0 | -0.99793817  | 0 | 0.019911034 | 0 | -0.13847866 | 0 | 0            | 0 |
| 0 | -0.97024017  | 0 | -0.1456876  | 0 | 0           | 0 | 0            | 0 |
| 0 | -0.96853221  | 0 | -0.14484406 | 0 | 0           | 0 | 0.001350624  | 0 |
| 0 | -0.96902541  | 0 | -0.14525043 | 0 | 0           | 0 | 0.00159897   | 0 |
| 0 | 0            | 0 | 0           | 0 | -0.14204117 | 0 | -0.007498236 | 0 |
| 0 | -0.94099089  | 0 | 0.010959254 | 0 | -0.12650888 | 0 | 0            | 0 |
| 0 | 0            | 0 | 0           | 0 | -0.14189094 | 0 | 0            | 0 |
| 0 | 0            | 0 | 0.021990059 | 0 | -0.16373511 | 0 | 0            | 0 |
| 0 | 0            | 0 | 0           | 0 | -0.13441319 | 0 | -0.008368008 | 0 |
| 0 | 0            | 0 | 0.023013934 | 0 | -0.15711049 | 0 | 0            | 0 |
| 0 | -0.99902193  | 0 | -0.12535654 | 0 | 0           | 0 | 0            | 0 |
| 0 | -0.082183627 | 0 | -0.13302059 | 0 | 0           | 0 | 0            | 0 |
| 0 | -0.9989585   | 0 | -0.12619821 | 0 | 0           | 0 | -0.011652193 | 0 |
| 0 | 0            | 0 | 0           | 0 | -0.13172653 | 0 | -0.007519229 | 0 |
| 0 | 0            | 0 | 0.028279029 | 0 | -0.15958771 | 0 | 0            | 0 |
| 0 | 0            | 0 | 0.025984459 | 0 | -0.15663378 | 0 | -0.008010114 | 0 |
| 0 | -1.0005604   | 0 | -0.13536299 | 0 | 0           | 0 | -0.004223687 | 0 |
| 0 | -0.999268    | 0 | -0.1247638  | 0 | 0           | 0 | -0.012868263 | 0 |
| 0 | 0            | 0 | 0           | 0 | -0.14019397 | 0 | 0            | 0 |
| 0 | -0.0905245   | 0 | -0.12915129 | 0 | 0           | 0 | -0.011046793 | 0 |
| 0 | -0.94017352  | 0 | -0.11084053 | 0 | 0           | 0 | -0.011056096 | 0 |
| 0 | -0.079578137 | 0 | -0.13372824 | 0 | 0           | 0 | -0.010452699 | 0 |
| 0 | -0.075332261 | 0 | -0.13484423 | 0 | 0           | 0 | 0            | 0 |
| 0 | -0.078677158 | 0 | -0.13343278 | 0 | 0           | 0 | 0            | 0 |
| 0 | -0.99542422  | 0 | -0.11284648 | 0 | 0           | 0 | -0.011503439 | 0 |
| 0 | 0            | 0 | 0.018434443 | 0 | -0.15903127 | 0 | 0            | 0 |
| 0 | 0            | 0 | 0           | 0 | -0.14117581 | 0 | -0.000547873 | 0 |
| 0 | -0.095259625 | 0 | -0.12637634 | 0 | 0           | 0 | -0.010320783 | 0 |
| 0 | -0.089609215 | 0 | 0           | 0 | -0.13241893 | 0 | -0.012527423 | 0 |
| 0 | 0            | 0 | 0.016315332 | 0 | -0.15577319 | 0 | -0.001304266 | 0 |

|   |              |   |             |   |             |   |              |   |
|---|--------------|---|-------------|---|-------------|---|--------------|---|
| 0 | 0            | 0 | 0.016406906 | 0 | -0.15589674 | 0 | 0            | 0 |
| 0 | 0            | 0 | 0           | 0 | -0.13993582 | 0 | -0.001431908 | 0 |
| 0 | 0            | 0 | -0.13109568 | 0 | 0           | 0 | 0            | 0 |
| 0 | -0.086037491 | 0 | 0.031099011 | 0 | -0.16317624 | 0 | 0            | 0 |
| 0 | -0.082899846 | 0 | 0           | 0 | -0.13419906 | 0 | 0            | 0 |
| 0 | -0.082240944 | 0 | 0           | 0 | -0.13492854 | 0 | -0.012855668 | 0 |
| 0 | -0.99931337  | 0 | 0.014712027 | 0 | -0.12317859 | 0 | -0.013710368 | 0 |
| 0 | 0            | 0 | -0.13437127 | 0 | 0           | 0 | 0            | 0 |
| 0 | -0.084086645 | 0 | 0.028087114 | 0 | -0.16109174 | 0 | -0.013589098 | 0 |
| 0 | -0.07860789  | 0 | 0.031278606 | 0 | -0.16584278 | 0 | 0            | 0 |
| 0 | -1.0216953   | 0 | 0           | 0 | -0.1435122  | 0 | 0.020227852  | 0 |
| 0 | 0            | 0 | -0.13330284 | 0 | 0           | 0 | -0.008911892 | 0 |
| 0 | -0.085066523 | 0 | 0           | 0 | -0.13331914 | 0 | -0.013960111 | 0 |
| 0 | 0            | 0 | -0.13304632 | 0 | 0           | 0 | 0            | 0 |
| 0 | 0            | 0 | 0.019303287 | 0 | -0.14587519 | 0 | 0            | 0 |
| 0 | 0            | 0 | 0           | 0 | -0.127426   | 0 | 0.00223444   | 0 |
| 0 | -0.095424584 | 0 | 0.028516005 | 0 | -0.15635746 | 0 | -0.014160674 | 0 |
| 0 | 0            | 0 | -0.12712701 | 0 | 0           | 0 | -0.009648771 | 0 |
| 0 | -0.080981258 | 0 | 0.029070928 | 0 | -0.1621189  | 0 | 0            | 0 |
| 0 | -0.099107393 | 0 | 0.032852622 | 0 | -0.15895828 | 0 | -0.013105091 | 0 |
| 0 | -1.0064449   | 0 | 0           | 0 | -0.14809213 | 0 | 0.026892135  | 0 |
| 0 | -1.0064481   | 0 | 0.000102981 | 0 | -0.14891113 | 0 | 0.027674633  | 0 |
| 0 | 0            | 0 | 0           | 0 | -0.13977207 | 0 | -0.006491899 | 0 |
| 0 | -0.94812634  | 0 | 0           | 0 | -0.10304247 | 0 | -0.009296394 | 0 |
| 0 | 0            | 0 | 0.013688551 | 0 | -0.15347591 | 0 | 0            | 0 |
| 0 | -0.003742561 | 0 | 0           | 0 | -0.14035645 | 0 | 0            | 0 |
| 0 | 0            | 0 | 0           | 0 | -0.14014203 | 0 | 0            | 0 |
| 0 | -0.94843512  | 0 | 0.019607844 | 0 | -0.12243103 | 0 | 0            | 0 |
| 0 | -0.94800764  | 0 | 0.016858252 | 0 | -0.11889324 | 0 | -0.009968775 | 0 |
| 0 | 0            | 0 | -0.12413003 | 0 | 0           | 0 | -0.008902519 | 0 |
| 0 | -1.0290062   | 0 | 0           | 0 | -0.14281398 | 0 | 0            | 0 |
| 0 | -1.029961    | 0 | 0.001626387 | 0 | -0.14494807 | 0 | 0            | 0 |
| 0 | 0            | 0 | 0           | 0 | -0.13019692 | 0 | -0.010979807 | 0 |
| 0 | 0            | 0 | 0           | 0 | -0.13357831 | 0 | 0            | 0 |
| 0 | 0            | 0 | 0.030298811 | 0 | -0.16010279 | 0 | 0            | 0 |
| 0 | 0            | 0 | 0           | 0 | -0.14108101 | 0 | -0.006624321 | 0 |
| 0 | 0            | 0 | 0           | 0 | -0.13428164 | 0 | -0.011212682 | 0 |
| 0 | 0            | 0 | 0.014228057 | 0 | -0.15526149 | 0 | 0            | 0 |
| 0 | 0            | 0 | 0.013372021 | 0 | -0.15424968 | 0 | -0.008415866 | 0 |
| 0 | 0.00053023   | 0 | 0           | 0 | -0.14130262 | 0 | -0.008372429 | 0 |
| 0 | 0            | 0 | 0.029867299 | 0 | -0.16378197 | 0 | 0            | 0 |
| 0 | -0.039484119 | 0 | 0           | 0 | -0.16119847 | 0 | 0.006673561  | 0 |
| 0 | 0.003271293  | 0 | 0.014252696 | 0 | -0.15562873 | 0 | 0            | 0 |
| 0 | 0            | 0 | -0.1317967  | 0 | 0           | 0 | 0            | 0 |
| 0 | 0            | 0 | 0.026833255 | 0 | -0.15917573 | 0 | -0.012005869 | 0 |
| 0 | -0.03758394  | 0 | 0.009621588 | 0 | -0.17156398 | 0 | 0.007661941  | 0 |
| 0 | -0.040475975 | 0 | 0           | 0 | -0.16108407 | 0 | 0            | 0 |



|   |              |   |              |   |             |   |              |   |
|---|--------------|---|--------------|---|-------------|---|--------------|---|
| 0 | -0.037646228 | 0 | 0            | 0 | -0.16217478 | 0 | 0.007566059  | 0 |
| 0 | -0.040473576 | 0 | 0.007996149  | 0 | -0.16908427 | 0 | 0            | 0 |
| 0 | 0            | 0 | 0            | 0 | -0.13277745 | 0 | -0.012320043 | 0 |
| 0 | -0.038339124 | 0 | 0.008190115  | 0 | -0.1705014  | 0 | 0            | 0 |
| 0 | 0            | 0 | 0            | 0 | -0.13928327 | 0 | -0.007921147 | 0 |
| 0 | 0            | 0 | 0.011198797  | 0 | -0.15060619 | 0 | -0.007705305 | 0 |
| 0 | 0            | 0 | 0.010338867  | 0 | -0.14935382 | 0 | -0.00940344  | 0 |
| 0 | -0.001049646 | 0 | 0            | 0 | -0.13937031 | 0 | -0.00970158  | 0 |
| 0 | 0            | 0 | 0.027780621  | 0 | -0.16025561 | 0 | 0            | 0 |
| 0 | 0            | 0 | 0.011328599  | 0 | -0.15072642 | 0 | 0            | 0 |
| 0 | 0.000450639  | 0 | 0.011003243  | 0 | -0.15064148 | 0 | -0.009451859 | 0 |
| 0 | 0            | 0 | -0.13265685  | 0 | 0           | 0 | -0.002393958 | 0 |
| 0 | 0.002231008  | 0 | 0.011234425  | 0 | -0.15083031 | 0 | 0            | 0 |
| 0 | 0            | 0 | 0.027858442  | 0 | -0.15329791 | 0 | -0.01273209  | 0 |
| 0 | 0            | 0 | 0.017720838  | 0 | -0.13811741 | 0 | 0.000596343  | 0 |
| 0 | 0            | 0 | -0.13157499  | 0 | 0           | 0 | -0.003120252 | 0 |
| 0 | 0            | 0 | 0            | 0 | -0.15948063 | 0 | 0.007409366  | 0 |
| 0 | 0            | 0 | 0.009211759  | 0 | -0.16912161 | 0 | 0.008113082  | 0 |
| 0 | 0            | 0 | 0            | 0 | -0.16019921 | 0 | 0.008022916  | 0 |
| 0 | 0            | 0 | 0.032518672  | 0 | -0.15600659 | 0 | -0.011648111 | 0 |
| 0 | 0            | 0 | 0            | 0 | -0.15938113 | 0 | 0            | 0 |
| 0 | -0.084447229 | 0 | -0.12450505  | 0 | 0           | 0 | -0.013908567 | 0 |
| 0 | 0            | 0 | 0.007567222  | 0 | -0.16696096 | 0 | 0            | 0 |
| 0 | 0            | 0 | 0.007830722  | 0 | -0.16818769 | 0 | 0            | 0 |
| 0 | -0.94748756  | 0 | -0.09850328  | 0 | 0           | 0 | -0.01029818  | 0 |
| 0 | -1.0037781   | 0 | -0.010516033 | 0 | -0.14027381 | 0 | 0            | 0 |
| 0 | -0.014616023 | 0 | 0            | 0 | -0.12601779 | 0 | -0.008239236 | 0 |
| 0 | 0            | 0 | 0            | 0 | -0.1566344  | 0 | 0.008117476  | 0 |
| 0 | 0            | 0 | 0.008893241  | 0 | -0.1658418  | 0 | 0.008708529  | 0 |
| 0 | 0            | 0 | 0.008545447  | 0 | -0.16510656 | 0 | 0.008569583  | 0 |
| 0 | -0.011991579 | 0 | 0.014900163  | 0 | -0.14091303 | 0 | 0            | 0 |
| 0 | -0.079771893 | 0 | -0.12508763  | 0 | 0           | 0 | 0            | 0 |
| 0 | 0            | 0 | 0            | 0 | -0.12529747 | 0 | -0.006587381 | 0 |
| 0 | 0            | 0 | 0.0075377    | 0 | -0.1639058  | 0 | 0            | 0 |
| 0 | 0            | 0 | 0.014538583  | 0 | -0.13865625 | 0 | -0.004829669 | 0 |
| 0 | -0.049506316 | 0 | 0.015876397  | 0 | -0.16767463 | 0 | 0.000779371  | 0 |
| 0 | -0.04919195  | 0 | 0.015767515  | 0 | -0.16779048 | 0 | 0.00101049   | 0 |
| 0 | -0.049519466 | 0 | 0.015641071  | 0 | -0.16755399 | 0 | 0            | 0 |
| 0 | 0            | 0 | 0.014974356  | 0 | -0.14016779 | 0 | 0            | 0 |
| 0 | 0            | 0 | -0.12099179  | 0 | 0           | 0 | 0.000326003  | 0 |
| 0 | -1.020762    | 0 | -0.13692929  | 0 | 0           | 0 | 0.018635126  | 0 |
| 0 | -0.049516822 | 0 | 0            | 0 | -0.15218899 | 0 | 0.000613381  | 0 |
| 0 | -0.079292797 | 0 | -0.12587821  | 0 | 0           | 0 | -0.014296055 | 0 |
| 0 | -0.082492808 | 0 | -0.12446461  | 0 | 0           | 0 | -0.015299758 | 0 |
| 0 | -1.0054678   | 0 | -0.14126466  | 0 | 0           | 0 | 0.024774178  | 0 |
| 0 | -1.0010011   | 0 | 0.022625596  | 0 | -0.11986752 | 0 | -0.01246481  | 0 |
| 0 | 0            | 0 | 0.024184078  | 0 | -0.15531154 | 0 | 0            | 0 |

|   |              |   |              |   |             |   |              |   |
|---|--------------|---|--------------|---|-------------|---|--------------|---|
| 0 | 0            | 0 | 0            | 0 | -0.13163846 | 0 | -0.004690328 | 0 |
| 0 | 0            | 0 | -0.13167732  | 0 | 0           | 0 | -0.00795893  | 0 |
| 0 | 0            | 0 | 0.024621927  | 0 | -0.13951168 | 0 | 0.002477454  | 0 |
| 0 | -1.027032    | 0 | -0.13630122  | 0 | 0           | 0 | 0            | 0 |
| 0 | 0            | 0 | -0.13205198  | 0 | 0           | 0 | 0            | 0 |
| 0 | -0.003374381 | 0 | -0.13225728  | 0 | 0           | 0 | 0            | 0 |
| 0 | -1.0349399   | 0 | 0            | 0 | -0.13444272 | 0 | 0.020767892  | 0 |
| 0 | 0            | 0 | 0.024050026  | 0 | -0.15582763 | 0 | -0.004964706 | 0 |
| 0 | 0            | 0 | 0.016211473  | 0 | -0.16538461 | 0 | 0.000958503  | 0 |
| 0 | 0            | 0 | 0.015828153  | 0 | -0.16519781 | 0 | 0            | 0 |
| 0 | 0            | 0 | 0.016194829  | 0 | -0.1650746  | 0 | 0.000713775  | 0 |
| 0 | 0            | 0 | 0            | 0 | -0.14962166 | 0 | 0.000861617  | 0 |
| 0 | 0            | 0 | 0            | 0 | -0.15427846 | 0 | 0.004230152  | 0 |
| 0 | 0            | 0 | -0.12242395  | 0 | 0           | 0 | -0.01232781  | 0 |
| 0 | 0            | 0 | 0.00627303   | 0 | -0.16013656 | 0 | 0.003912478  | 0 |
| 0 | 0            | 0 | 0.005936007  | 0 | -0.1591427  | 0 | 0.003384678  | 0 |
| 0 | 0            | 0 | 0.005320046  | 0 | -0.15955636 | 0 | 0            | 0 |
| 0 | 0            | 0 | 0.022081017  | 0 | -0.15279603 | 0 | -0.005954664 | 0 |
| 0 | 0.005662068  | 0 | 0            | 0 | -0.15494877 | 0 | 0.002854499  | 0 |
| 0 | 0.004913772  | 0 | 0.005059201  | 0 | -0.15993642 | 0 | 0            | 0 |
| 0 | 0.006561378  | 0 | 0.005891104  | 0 | -0.16033165 | 0 | 0.002359595  | 0 |
| 0 | 0.005990794  | 0 | 0.00545344   | 0 | -0.15926053 | 0 | 0.001921959  | 0 |
| 0 | 0            | 0 | 0.005165485  | 0 | -0.16044893 | 0 | 0.00187505   | 0 |
| 0 | 0            | 0 | -0.12460869  | 0 | 0           | 0 | 0            | 0 |
| 0 | 0            | 0 | -0.13293258  | 0 | 0           | 0 | -0.008152342 | 0 |
| 0 | 0.00068704   | 0 | -0.13315608  | 0 | 0           | 0 | -0.009901638 | 0 |
| 0 | 0            | 0 | -0.12536061  | 0 | 0           | 0 | -0.0126377   | 0 |
| 0 | -1.0422167   | 0 | 0.006247916  | 0 | -0.13954978 | 0 | 0            | 0 |
| 0 | 0            | 0 | 0.016545994  | 0 | -0.16014318 | 0 | 0.001719943  | 0 |
| 0 | 0            | 0 | -0.13142266  | 0 | 0           | 0 | -0.009327391 | 0 |
| 0 | -0.00137694  | 0 | -0.1315293   | 0 | 0           | 0 | -0.011108167 | 0 |
| 0 | 0            | 0 | -0.12404234  | 0 | 0           | 0 | -0.013647649 | 0 |
| 0 | 0            | 0 | 0.025270891  | 0 | -0.14401674 | 0 | -0.002345962 | 0 |
| 0 | -1.019546    | 0 | 0            | 0 | -0.13203515 | 0 | 0.018548227  | 0 |
| 0 | -1.0109526   | 0 | 0.002019276  | 0 | -0.14236727 | 0 | 0.031539655  | 0 |
| 0 | -0.013755719 | 0 | -0.12005723  | 0 | 0           | 0 | -0.009564166 | 0 |
| 0 | 0            | 0 | -0.11934678  | 0 | 0           | 0 | -0.007900997 | 0 |
| 0 | -0.035518532 | 0 | -0.15259243  | 0 | 0           | 0 | 0.005145902  | 0 |
| 0 | -0.036295924 | 0 | -0.15253722  | 0 | 0           | 0 | 0            | 0 |
| 0 | -1.0079925   | 0 | -0.004821842 | 0 | -0.13083973 | 0 | 0.023333529  | 0 |
| 0 | -0.033135999 | 0 | -0.1538213   | 0 | 0           | 0 | 0.006435826  | 0 |
| 0 | -1.0146198   | 0 | -0.001567472 | 0 | -0.12543712 | 0 | 0.014835911  | 0 |
| 0 | 0            | 0 | 0.018830812  | 0 | -0.14934139 | 0 | -0.011424463 | 0 |
| 0 | -0.00531921  | 0 | 0            | 0 | -0.13114558 | 0 | -0.012718736 | 0 |
| 0 | 0            | 0 | 0            | 0 | -0.13105105 | 0 | -0.010883803 | 0 |
| 0 | -1.0259349   | 0 | -0.004449889 | 0 | -0.12707778 | 0 | 0            | 0 |
| 0 | 0            | 0 | -0.15096953  | 0 | 0           | 0 | 0.005897649  | 0 |

|   |              |   |              |   |             |              |              |
|---|--------------|---|--------------|---|-------------|--------------|--------------|
| 0 | 0            | 0 | -0.15093893  | 0 | 0           | 0            | 0            |
| 0 | 0            | 0 | 0.020074877  | 0 | -0.15099877 | 0            | 0            |
| 0 | 0            | 0 | -0.15193506  | 0 | 0           | 0.006897971  | 0            |
| 0 | -0.001189563 | 0 | 0.020095329  | 0 | -0.15119333 | 0            | 0            |
| 0 | 0            | 0 | -0.14871806  | 0 | 0           | 0.006524441  | 0            |
| 0 | -1.033365    | 0 | -0.12788293  | 0 | 0           | 0.018980752  | 0            |
| 0 | 0            | 0 | 0.019172313  | 0 | -0.15093002 | 0            | -0.011078796 |
| 0 | -1.0571094   | 0 | 0.012998685  | 0 | -0.14917095 | 0            | 0.030116049  |
| 0 | -0.045063821 | 0 | -0.14405057  | 0 | 0           | -0.000438169 | 0            |
| 0 | 0.000879435  | 0 | 0.019014326  | 0 | -0.15099741 | 0            | -0.012970287 |
| 0 | -0.010366324 | 0 | 0.009946876  | 0 | -0.12525997 | 0            | -0.011948299 |
| 0 | 0            | 0 | -0.12322264  | 0 | 0           | -0.006300285 | 0            |
| 0 | 0            | 0 | 0.01375421   | 0 | -0.15412815 | 0            | -0.004121787 |
| 0 | 0            | 0 | 0.01024217   | 0 | -0.12493945 | 0            | -0.010234306 |
| 0 | 0.001275326  | 0 | 0.013106464  | 0 | -0.15445887 | 0            | -0.005389218 |
| 0 | 0            | 0 | 0.016334429  | 0 | -0.14645669 | 0            | -0.012448154 |
| 0 | -0.000151825 | 0 | 0.016076822  | 0 | -0.14626689 | 0            | -0.014393957 |
| 0 | -1.0184487   | 0 | -0.12681291  | 0 | 0           | 0.016926156  | 0            |
| 0 | 0            | 0 | -0.141583    | 0 | 0           | -0.000164505 | 0            |
| 0 | 0            | 0 | -0.1467024   | 0 | 0           | 0.003090172  | 0            |
| 0 | -0.013404632 | 0 | 0.01971559   | 0 | -0.13687569 | 0            | -0.012893959 |
| 0 | 0.006060744  | 0 | -0.14737727  | 0 | 0           | 0.001708407  | 0            |
| 0 | 0            | 0 | 0.019975592  | 0 | -0.13636479 | 0            | -0.011100614 |
| 0 | -0.005429507 | 0 | -0.12315236  | 0 | 0           | -0.014071767 | 0            |
| 0 | 0            | 0 | -0.12304657  | 0 | 0           | -0.012239123 | 0            |
| 0 | -0.068317358 | 0 | 0            | 0 | -0.14606155 | 0            | 0.020860274  |
| 0 | -0.06770145  | 0 | 0.005267474  | 0 | -0.15155635 | 0            | 0.021278636  |
| 0 | 0            | 0 | 0.018997497  | 0 | -0.12072716 | 0            | -0.009402511 |
| 0 | -0.002971002 | 0 | 0.018814694  | 0 | -0.12093057 | 0            | -0.01114686  |
| 0 | -0.066046786 | 0 | 0.001354817  | 0 | -0.15060148 | 0            | 0.025667373  |
| 0 | -0.073673207 | 0 | 0.001312768  | 0 | -0.14640739 | 0            | 0            |
| 0 | 0            | 0 | 0.004791621  | 0 | -0.14847803 | 0            | 0.022321439  |
| 0 | 0            | 0 | 0            | 0 | -0.14376667 | 0            | 0.022213055  |
| 0 | 0            | 0 | 0.001287506  | 0 | -0.14790441 | 0            | 0.026480713  |
| 0 | 0            | 0 | 0.000544051  | 0 | -0.1433012  | 0            | 0            |
| 0 | -0.063574667 | 0 | -0.1390998   | 0 | 0           | 0.018941945  | 0            |
| 0 | 0            | 0 | 0.003209515  | 0 | -0.13866615 | 0            | 0.026656367  |
| 0 | -0.08242434  | 0 | 0.009794172  | 0 | -0.14634524 | 0            | 0.021299177  |
| 0 | 0            | 0 | -0.13693487  | 0 | 0           | 0.020319702  | 0            |
| 0 | -1.0421684   | 0 | 0.002761462  | 0 | -0.10916406 | 0            | 0.017895367  |
| 0 | 0            | 0 | 0.00948775   | 0 | -0.14333405 | 0            | 0.022687778  |
| 0 | 0            | 0 | -0.001861333 | 0 | -0.13032125 | 0            | 0.020313272  |
| 0 | -0.003078884 | 0 | -0.002272915 | 0 | -0.13078104 | 0            | 0.01873503   |
| 0 | -0.92711106  | 0 | 0            | 0 | 0           | 0            | 0            |
| 0 | -0.92850665  | 0 | 0            | 0 | 0           | -0.013836742 | 0            |
| 0 | -0.92898222  | 0 | 0            | 0 | 0           | 0            | 0            |
| 0 | -0.96199583  | 0 | 0            | 0 | 0           | 0            | 0            |

|   |              |   |             |   |             |   |              |   |
|---|--------------|---|-------------|---|-------------|---|--------------|---|
| 0 | -0.96124275  | 0 | 0           | 0 | 0           | 0 | -0.016290043 | 0 |
| 0 | -0.96151522  | 0 | 0           | 0 | 0           | 0 | -0.015542748 | 0 |
| 0 | -0.92701777  | 0 | 0           | 0 | 0           | 0 | -0.013313499 | 0 |
| 0 | -0.92706452  | 0 | 0           | 0 | 0           | 0 | -0.013634492 | 0 |
| 0 | -0.92700408  | 0 | 0           | 0 | 0           | 0 | 0            | 0 |
| 0 | -0.95962243  | 0 | 0           | 0 | 0           | 0 | -0.015160668 | 0 |
| 0 | -0.92905796  | 0 | 0           | 0 | 0           | 0 | 0            | 0 |
| 0 | -0.92889089  | 0 | 0           | 0 | 0           | 0 | -0.01300767  | 0 |
| 0 | -0.93105869  | 0 | 0           | 0 | 0           | 0 | -0.014396565 | 0 |
| 0 | -0.9641369   | 0 | 0           | 0 | 0           | 0 | -0.014927208 | 0 |
| 0 | -0.93276291  | 0 | 0           | 0 | 0           | 0 | -0.013541841 | 0 |
| 0 | -0.073415337 | 0 | 0           | 0 | 0           | 0 | 0            | 0 |
| 0 | -0.076436765 | 0 | 0           | 0 | 0           | 0 | -0.016071285 | 0 |
| 0 | -0.07085671  | 0 | 0           | 0 | 0           | 0 | -0.015434582 | 0 |
| 0 | 0            | 0 | 0           | 0 | 0           | 0 | 0            | 0 |
| 0 | -0.078566637 | 0 | 0           | 0 | 0           | 0 | -0.017458519 | 0 |
| 0 | 0            | 0 | 0           | 0 | 0           | 0 | -0.014488485 | 0 |
| 0 | 0            | 0 | 0           | 0 | 0           | 0 | -0.013831053 | 0 |
| 0 | -0.041317549 | 0 | 0           | 0 | 0           | 0 | -0.015070487 | 0 |
| 0 | 0            | 0 | 0           | 0 | 0           | 0 | -0.015877286 | 0 |
| 0 | 0            | 0 | 0           | 0 | 0           | 0 | -0.007560112 | 0 |
| 0 | 0            | 0 | 0           | 0 | 0           | 0 | -0.013410116 | 0 |
| 0 | -0.003922345 | 0 | 0           | 0 | 0           | 0 | -0.014705726 | 0 |
| 0 | 0            | 0 | 0           | 0 | 0           | 0 | -0.013022798 | 0 |
| 0 | -0.9995148   | 0 | 0           | 0 | 0           | 0 | 0            | 0 |
| 0 | -0.99978515  | 0 | 0           | 0 | 0           | 0 | 0.008439725  | 0 |
| 0 | -0.99591288  | 0 | 0           | 0 | 0           | 0 | 0.006451623  | 0 |
| 0 | -0.9666704   | 0 | 0           | 0 | 0           | 0 | 0.013545358  | 0 |
| 0 | -1.0068124   | 0 | 0           | 0 | 0           | 0 | 0.01264356   | 0 |
| 0 | -1.0235116   | 0 | 0           | 0 | 0           | 0 | 0.015413611  | 0 |
| 0 | 0            | 0 | 0           | 0 | 0           | 0 | 0.008202228  | 0 |
| 0 | 0.003594196  | 0 | 0           | 0 | 0           | 0 | 0.00745023   | 0 |
| 0 | -0.93297777  | 0 | 0           | 0 | -0.13923163 | 0 | 0            | 0 |
| 0 | -0.93641723  | 0 | 0           | 0 | -0.1437958  | 0 | 0            | 0 |
| 0 | -0.93612479  | 0 | 0           | 0 | -0.14243267 | 0 | -0.007285226 | 0 |
| 0 | -0.93629538  | 0 | 0.021534913 | 0 | -0.16367339 | 0 | 0            | 0 |
| 0 | -0.93577772  | 0 | 0           | 0 | -0.14233217 | 0 | 0            | 0 |
| 0 | -0.93472693  | 0 | 0           | 0 | -0.13476752 | 0 | -0.008145792 | 0 |
| 0 | -0.93498112  | 0 | 0.022643865 | 0 | -0.15709684 | 0 | 0            | 0 |
| 0 | -0.93698715  | 0 | 0           | 0 | -0.13217719 | 0 | -0.007306791 | 0 |
| 0 | -0.93715846  | 0 | 0.027796023 | 0 | -0.15955816 | 0 | 0            | 0 |
| 0 | -0.93682103  | 0 | 0.025518991 | 0 | -0.15663003 | 0 | -0.007795654 | 0 |
| 0 | -0.93299697  | 0 | -0.13139475 | 0 | 0           | 0 | 0            | 0 |
| 0 | -0.99336255  | 0 | 0           | 0 | -0.13185372 | 0 | -0.010029028 | 0 |
| 0 | -0.99581084  | 0 | 0           | 0 | -0.13540012 | 0 | 0            | 0 |
| 0 | -0.99459232  | 0 | 0.028883657 | 0 | -0.16034551 | 0 | 0            | 0 |
| 0 | -0.99567275  | 0 | 0           | 0 | -0.13610893 | 0 | -0.010242878 | 0 |

|   |              |   |             |   |             |              |              |
|---|--------------|---|-------------|---|-------------|--------------|--------------|
| 0 | -0.93637815  | 0 | -0.134771   | 0 | 0           | 0            | 0            |
| 0 | -0.93604442  | 0 | -0.13371154 | 0 | 0           | -0.008701513 | 0            |
| 0 | -0.996951    | 0 | 0.028388219 | 0 | -0.16410111 | 0            | 0            |
| 0 | -0.93550974  | 0 | -0.13349798 | 0 | 0           | 0            | 0            |
| 0 | -0.99562417  | 0 | 0.025469231 | 0 | -0.1596949  | 0            | -0.011034875 |
| 0 | -0.99579956  | 0 | 0           | 0 | -0.13465094 | 0            | -0.011329252 |
| 0 | -0.93455928  | 0 | -0.12749254 | 0 | 0           | -0.009429448 | 0            |
| 0 | -0.99736755  | 0 | 0.026337642 | 0 | -0.16068813 | 0            | 0            |
| 0 | -0.93791346  | 0 | 0           | 0 | -0.14060218 | 0            | 0            |
| 0 | -0.994282    | 0 | 0.026566356 | 0 | -0.1537419  | 0            | -0.011767903 |
| 0 | -0.93680739  | 0 | -0.1245941  | 0 | 0           | -0.008685843 | 0            |
| 0 | -0.99421858  | 0 | 0.031188917 | 0 | -0.15641528 | 0            | -0.01069845  |
| 0 | -0.94075126  | 0 | 0           | 0 | -0.14150046 | 0            | -0.006411128 |
| 0 | -0.94094003  | 0 | 0.013866699 | 0 | -0.15531787 | 0            | 0            |
| 0 | -0.97611701  | 0 | 0           | 0 | -0.15852007 | 0            | 0.006462235  |
| 0 | -0.97681538  | 0 | 0.009817605 | 0 | -0.16850522 | 0            | 0.006957056  |
| 0 | -0.97675044  | 0 | 0           | 0 | -0.15899173 | 0            | 0.006855428  |
| 0 | -0.97676034  | 0 | 0           | 0 | -0.15845763 | 0            | 0            |
| 0 | -0.97740657  | 0 | 0.008441536 | 0 | -0.16683454 | 0            | 0            |
| 0 | -0.97843103  | 0 | 0.008657781 | 0 | -0.16773567 | 0            | 0            |
| 0 | -0.94030595  | 0 | 0           | 0 | -0.13976792 | 0            | -0.007688563 |
| 0 | -0.94075566  | 0 | 0.010818474 | 0 | -0.15065826 | 0            | -0.007493309 |
| 0 | -0.94058672  | 0 | 0.011079594 | 0 | -0.1509536  | 0            | 0            |
| 0 | -1.0007786   | 0 | 0.015157658 | 0 | -0.16578156 | 0            | 0.001593688  |
| 0 | -1.0007528   | 0 | 0.015164351 | 0 | -0.16545788 | 0            | 0.001309578  |
| 0 | -1.0005581   | 0 | 0.014643869 | 0 | -0.16551677 | 0            | 0            |
| 0 | -1.0009329   | 0 | 0           | 0 | -0.15103941 | 0            | 0.001497521  |
| 0 | -0.99222082  | 0 | -0.12409942 | 0 | 0           | -0.011390933 | 0            |
| 0 | -0.93632689  | 0 | 0           | 0 | -0.1256779  | 0            | -0.006397805 |
| 0 | -0.93648919  | 0 | 0.01464675  | 0 | -0.14022011 | 0            | 0            |
| 0 | -0.99460307  | 0 | -0.12645625 | 0 | 0           | 0            | 0            |
| 0 | -0.99433665  | 0 | -0.12720648 | 0 | 0           | -0.011684934 | 0            |
| 0 | -0.96858447  | 0 | 0           | 0 | -0.15316772 | 0            | 0.003284155  |
| 0 | -0.96924617  | 0 | 0.005915323 | 0 | -0.15899847 | 0            | 0            |
| 0 | -0.96783729  | 0 | 0.006840328 | 0 | -0.15947814 | 0            | 0.002811113  |
| 0 | -0.96640111  | 0 | 0.006351946 | 0 | -0.15795669 | 0            | 0.001960164  |
| 0 | -0.99435002  | 0 | -0.12592599 | 0 | 0           | -0.01267336  | 0            |
| 0 | -0.93758992  | 0 | -0.13251708 | 0 | 0           | 0            | 0            |
| 0 | -0.090404269 | 0 | 0           | 0 | -0.14054712 | 0            | -0.007770625 |
| 0 | -0.088272327 | 0 | 0.024766526 | 0 | -0.16503143 | 0            | 0            |
| 0 | -0.99850777  | 0 | 0           | 0 | -0.13294379 | 0            | -0.009926002 |
| 0 | -0.084308745 | 0 | 0           | 0 | -0.14264903 | 0            | 0            |
| 0 | -0.9405144   | 0 | -0.13335916 | 0 | 0           | -0.007942407 | 0            |
| 0 | -0.99993095  | 0 | 0.018699618 | 0 | -0.15152171 | 0            | 0            |
| 0 | -0.93983018  | 0 | -0.13190397 | 0 | 0           | -0.009098328 | 0            |
| 0 | -1.0000298   | 0 | 0.017896313 | 0 | -0.15155511 | 0            | -0.010116478 |
| 0 | -0.081604077 | 0 | 0           | 0 | -0.14349378 | 0            | -0.008196106 |

|   |              |   |             |   |             |   |              |   |
|---|--------------|---|-------------|---|-------------|---|--------------|---|
| 0 | -1.0013608   | 0 | 0.012724457 | 0 | -0.15457631 | 0 | -0.003479675 | 0 |
| 0 | -0.97669161  | 0 | -0.15000312 | 0 | 0           | 0 | 0.004960107  | 0 |
| 0 | -0.079393116 | 0 | 0.024946692 | 0 | -0.16814794 | 0 | 0            | 0 |
| 0 | -0.97720002  | 0 | -0.15000707 | 0 | 0           | 0 | 0            | 0 |
| 0 | -0.97790598  | 0 | -0.15074576 | 0 | 0           | 0 | 0.005744313  | 0 |
| 0 | -0.084897062 | 0 | 0           | 0 | -0.14182356 | 0 | -0.009259384 | 0 |
| 0 | -0.083244402 | 0 | 0.022517206 | 0 | -0.16436025 | 0 | -0.008886543 | 0 |
| 0 | -0.082255444 | 0 | 0.022598172 | 0 | -0.1642577  | 0 | 0            | 0 |
| 0 | -0.93613162  | 0 | -0.11973531 | 0 | 0           | 0 | -0.007717553 | 0 |
| 0 | -0.096383928 | 0 | 0.022838158 | 0 | -0.15871473 | 0 | -0.009585408 | 0 |
| 0 | -1.0004964   | 0 | 0.015172758 | 0 | -0.14723506 | 0 | -0.011468443 | 0 |
| 0 | -0.99996769  | 0 | -0.14300491 | 0 | 0           | 0 | 0.00045312   | 0 |
| 0 | -0.1010411   | 0 | 0.027826327 | 0 | -0.16114364 | 0 | -0.008704459 | 0 |
| 0 | 0            | 0 | 0           | 0 | -0.14213237 | 0 | 0            | 0 |
| 0 | 0            | 0 | 0           | 0 | -0.13857851 | 0 | -0.006302729 | 0 |
| 0 | 0            | 0 | 0.023994735 | 0 | -0.16222277 | 0 | 0            | 0 |
| 0 | -0.99626004  | 0 | 0.018728261 | 0 | -0.13689963 | 0 | -0.010156954 | 0 |
| 0 | 0            | 0 | 0           | 0 | -0.14298576 | 0 | -0.006626509 | 0 |
| 0 | 0            | 0 | 0.023631008 | 0 | -0.16626584 | 0 | 0            | 0 |
| 0 | -0.94057227  | 0 | 0.00998281  | 0 | -0.12518839 | 0 | -0.010002151 | 0 |
| 0 | -0.96983929  | 0 | -0.14560861 | 0 | 0           | 0 | 0.002153415  | 0 |
| 0 | 0            | 0 | 0           | 0 | -0.14141154 | 0 | -0.007680633 | 0 |
| 0 | 0            | 0 | 0.021298742 | 0 | -0.16263181 | 0 | -0.007366425 | 0 |
| 0 | 0            | 0 | 0.021371539 | 0 | -0.16255875 | 0 | 0            | 0 |
| 0 | -0.99715867  | 0 | -0.12494813 | 0 | 0           | 0 | -0.011296833 | 0 |
| 0 | 0            | 0 | 0.022173238 | 0 | -0.15591855 | 0 | -0.008223587 | 0 |
| 0 | -0.085094445 | 0 | -0.13256342 | 0 | 0           | 0 | -0.009289082 | 0 |
| 0 | 0            | 0 | 0.027468389 | 0 | -0.15843441 | 0 | -0.007324189 | 0 |
| 0 | -0.081003948 | 0 | -0.13352574 | 0 | 0           | 0 | 0            | 0 |
| 0 | -0.082186607 | 0 | -0.13288534 | 0 | 0           | 0 | -0.010727219 | 0 |
| 0 | -0.078519347 | 0 | -0.13432446 | 0 | 0           | 0 | -0.009788015 | 0 |
| 0 | 0            | 0 | 0.017720106 | 0 | -0.15732013 | 0 | 0            | 0 |
| 0 | 0            | 0 | 0           | 0 | -0.14019964 | 0 | 7.82E-05     | 0 |
| 0 | 0            | 0 | 0.01837624  | 0 | -0.15894652 | 0 | -0.000395724 | 0 |
| 0 | -0.08987054  | 0 | 0.029645621 | 0 | -0.16122067 | 0 | -0.012304176 | 0 |
| 0 | 0            | 0 | -0.13071765 | 0 | 0           | 0 | -0.007788921 | 0 |
| 0 | -0.086893417 | 0 | 0           | 0 | -0.13361009 | 0 | -0.012501968 | 0 |
| 0 | 0            | 0 | 0.016200071 | 0 | -0.15560123 | 0 | -0.001307295 | 0 |
| 0 | 0            | 0 | -0.13313821 | 0 | 0           | 0 | 0            | 0 |
| 0 | -0.083431413 | 0 | 0.030754007 | 0 | -0.16398359 | 0 | 0            | 0 |
| 0 | -0.082698241 | 0 | 0.029779836 | 0 | -0.16377614 | 0 | -0.012633312 | 0 |
| 0 | 0            | 0 | -0.13393615 | 0 | 0           | 0 | -0.008203469 | 0 |
| 0 | 0            | 0 | -0.1325777  | 0 | 0           | 0 | -0.009151292 | 0 |
| 0 | -0.085464799 | 0 | 0.027538281 | 0 | -0.1599973  | 0 | -0.013767568 | 0 |
| 0 | -1.0217568   | 0 | 0.005699655 | 0 | -0.14904822 | 0 | 0.02029177   | 0 |
| 0 | -1.0219703   | 0 | 0           | 0 | -0.14372778 | 0 | 0.02043412   | 0 |
| 0 | 0            | 0 | 0.019588069 | 0 | -0.14640554 | 0 | 0.002381915  | 0 |

|   |              |   |              |   |             |   |              |   |
|---|--------------|---|--------------|---|-------------|---|--------------|---|
| 0 | -1.0064345   | 0 | 0.000353519  | 0 | -0.14844171 | 0 | 0.02689785   | 0 |
| 0 | -0.006257543 | 0 | 0            | 0 | -0.13986031 | 0 | -0.00785885  | 0 |
| 0 | 0            | 0 | 0.013023198  | 0 | -0.15236027 | 0 | -0.006415139 | 0 |
| 0 | -0.94804629  | 0 | 0.018611829  | 0 | -0.121093   | 0 | -0.009167314 | 0 |
| 0 | 0            | 0 | 0            | 0 | -0.13975202 | 0 | -0.006169899 | 0 |
| 0 | -0.003738835 | 0 | 0.013676706  | 0 | -0.15357665 | 0 | 0            | 0 |
| 0 | 0            | 0 | 0.013697627  | 0 | -0.15338239 | 0 | 0            | 0 |
| 0 | 0            | 0 | 0            | 0 | -0.13306111 | 0 | -0.010902092 | 0 |
| 0 | 0            | 0 | 0.029037994  | 0 | -0.15840968 | 0 | -0.010764172 | 0 |
| 0 | -1.0290317   | 0 | 0.001776894  | 0 | -0.14453867 | 0 | 0            | 0 |
| 0 | 0            | 0 | 0.029419933  | 0 | -0.16207857 | 0 | 0            | 0 |
| 0 | 0            | 0 | 0.028604762  | 0 | -0.1619892  | 0 | -0.011000701 | 0 |
| 0 | 0            | 0 | 0.013542121  | 0 | -0.15417532 | 0 | -0.006533173 | 0 |
| 0 | 0.00055606   | 0 | 0.013379984  | 0 | -0.15424012 | 0 | -0.008282428 | 0 |
| 0 | -0.039576908 | 0 | 0            | 0 | -0.16102501 | 0 | 0.006269882  | 0 |
| 0 | -0.039514439 | 0 | 0.009243069  | 0 | -0.17018753 | 0 | 0.006775528  | 0 |
| 0 | 0            | 0 | 0.02645348   | 0 | -0.15840327 | 0 | -0.012132338 | 0 |
| 0 | 0            | 0 | -0.1317044   | 0 | 0           | 0 | -0.001680574 | 0 |
| 0 | -0.040519009 | 0 | 0.008619733  | 0 | -0.16946395 | 0 | 0            | 0 |
| 0 | -0.037678557 | 0 | 0.00954731   | 0 | -0.17145825 | 0 | 0.007663369  | 0 |
| 0 | 0            | 0 | 0.010611     | 0 | -0.14954132 | 0 | -0.007857497 | 0 |
| 0 | -0.001011581 | 0 | 0.010291904  | 0 | -0.14932098 | 0 | -0.009638475 | 0 |
| 0 | 0            | 0 | 0            | 0 | -0.15931398 | 0 | 0.007020491  | 0 |
| 0 | 0            | 0 | 0.008948747  | 0 | -0.1681835  | 0 | 0.007507267  | 0 |
| 0 | 0            | 0 | 0.009268763  | 0 | -0.16920341 | 0 | 0.008112074  | 0 |
| 0 | 0            | 0 | 0.008186816  | 0 | -0.16734012 | 0 | 0            | 0 |
| 0 | -0.084163644 | 0 | -0.12463091  | 0 | 0           | 0 | -0.013900432 | 0 |
| 0 | -0.014573672 | 0 | 0.014041377  | 0 | -0.13961154 | 0 | -0.008144808 | 0 |
| 0 | 0            | 0 | 0.008931785  | 0 | -0.16531328 | 0 | 0.008209317  | 0 |
| 0 | 0            | 0 | 0.014276315  | 0 | -0.13911954 | 0 | -0.006481474 | 0 |
| 0 | -0.049470327 | 0 | 0.015795441  | 0 | -0.16762589 | 0 | 0.000825675  | 0 |
| 0 | -1.0206391   | 0 | -0.13683605  | 0 | 0           | 0 | 0.018543556  | 0 |
| 0 | 0            | 0 | 0.023539153  | 0 | -0.15440369 | 0 | -0.004474373 | 0 |
| 0 | -0.006371179 | 0 | -0.1317761   | 0 | 0           | 0 | -0.009351222 | 0 |
| 0 | 0            | 0 | -0.13166381  | 0 | 0           | 0 | -0.00765626  | 0 |
| 0 | -1.0350267   | 0 | 0.010201906  | 0 | -0.14436513 | 0 | 0.020879938  | 0 |
| 0 | 0            | 0 | 0.016076826  | 0 | -0.16533701 | 0 | 0.001079715  | 0 |
| 0 | 0            | 0 | -0.1241677   | 0 | 0           | 0 | -0.012295401 | 0 |
| 0 | 0            | 0 | 0.005991308  | 0 | -0.16009457 | 0 | 0.004287098  | 0 |
| 0 | 0.005692133  | 0 | 0.00551243   | 0 | -0.16030076 | 0 | 0.002906676  | 0 |
| 0 | -1.0195477   | 0 | -0.001008684 | 0 | -0.13105745 | 0 | 0.018537282  | 0 |
| 0 | -0.035588678 | 0 | -0.1524332   | 0 | 0           | 0 | 0.004823425  | 0 |
| 0 | -0.005276788 | 0 | 0.018628638  | 0 | -0.14918349 | 0 | -0.012580682 | 0 |
| 0 | 0            | 0 | 0.018818517  | 0 | -0.14925078 | 0 | -0.010750112 | 0 |
| 0 | 0            | 0 | -0.15082175  | 0 | 0           | 0 | 0.005594934  | 0 |
| 0 | -0.068347861 | 0 | 0.005263785  | 0 | -0.15116883 | 0 | 0.020915465  | 0 |
| 0 | 0            | 0 | 0.004795272  | 0 | -0.14842348 | 0 | 0.022266108  | 0 |

|   |              |   |             |             |             |              |              |
|---|--------------|---|-------------|-------------|-------------|--------------|--------------|
| 0 | -0.92509378  | 0 | 0           | 0           | 0           | 0            | 0            |
| 0 | -0.92656826  | 0 | 0           | 0           | 0           | -0.014280676 | 0            |
| 0 | -0.95965568  | 0 | 0           | 0           | 0           | -0.015020493 | 0            |
| 0 | -0.92850724  | 0 | 0           | 0           | 0           | -0.013636717 | 0            |
| 0 | -0.92658913  | 0 | 0           | 0           | 0           | -0.013235431 | 0            |
| 0 | -0.92867025  | 0 | 0           | 0           | 0           | -0.012853687 | 0            |
| 0 | -0.078142739 | 0 | 0           | 0           | 0           | -0.014693958 | 0            |
| 0 | 0            | 0 | 0           | 0           | 0           | -0.013150518 | 0            |
| 0 | -0.99831033  | 0 | 0           | 0           | 0           | 0.007337816  | 0            |
| 0 | -0.93364255  | 0 | 0           | -0.14256729 | 0           | 0            | 0            |
| 0 | -0.93275074  | 0 | 0           | -0.13887341 | 0           | -0.006111582 | 0            |
| 0 | -0.9328832   | 0 | 0.023611717 | 0           | -0.16213401 | 0            | 0            |
| 0 | -0.93616499  | 0 | 0           | 0           | -0.14338045 | 0            | -0.006412142 |
| 0 | -0.93630349  | 0 | 0.023170298 | 0           | -0.16620073 | 0            | 0            |
| 0 | -0.93546762  | 0 | 0           | 0           | -0.14186729 | 0            | -0.007453434 |
| 0 | -0.93602707  | 0 | 0.020855156 | 0           | -0.16259312 | 0            | -0.007158969 |
| 0 | -0.93569265  | 0 | 0.020977726 | 0           | -0.16261896 | 0            | 0            |
| 0 | -0.93466404  | 0 | 0.021825545 | 0           | -0.15593637 | 0            | -0.008003453 |
| 0 | -0.936884    | 0 | 0.027009219 | 0           | -0.15843862 | 0            | -0.007107105 |
| 0 | -0.9327461   | 0 | -0.13102576 | 0           | 0           | 0            | -0.007600549 |
| 0 | -0.93344743  | 0 | -0.13358686 | 0           | 0           | 0            | 0            |
| 0 | -0.99414362  | 0 | 0           | 0           | -0.13492516 | 0            | -0.009944222 |
| 0 | -0.99297264  | 0 | 0.027735944 | 0           | -0.15880028 | 0            | -0.009822864 |
| 0 | -0.99536841  | 0 | 0.027949712 | 0           | -0.16246566 | 0            | 0            |
| 0 | -0.93607861  | 0 | -0.13434696 | 0           | 0           | 0            | -0.007991368 |
| 0 | -0.99526658  | 0 | 0.027221524 | 0           | -0.16247701 | 0            | -0.010041848 |
| 0 | -0.93514403  | 0 | -0.13304094 | 0           | 0           | 0            | -0.008922933 |
| 0 | -0.99546126  | 0 | 0.025102753 | 0           | -0.15896853 | 0            | -0.011153129 |
| 0 | -0.93773884  | 0 | 0           | 0           | -0.14021777 | 0            | -0.005978994 |
| 0 | -0.93787157  | 0 | 0.013357783 | 0           | -0.1535139  | 0            | 0            |
| 0 | -0.94070423  | 0 | 0.013203067 | 0           | -0.15426684 | 0            | -0.006322209 |
| 0 | -0.97574961  | 0 | 0           | 0           | -0.15839975 | 0            | 0.006181377  |
| 0 | -0.97620356  | 0 | 0.00965054  | 0           | -0.16790489 | 0            | 0.006568895  |
| 0 | -0.97682608  | 0 | 0.009889801 | 0           | -0.16860765 | 0            | 0.006955572  |
| 0 | -0.97684042  | 0 | 0.008913453 | 0           | -0.16712353 | 0            | 0            |
| 0 | -0.94027007  | 0 | 0.010335009 | 0           | -0.14975991 | 0            | -0.007623529 |
| 0 | -1.000765    | 0 | 0.015042214 | 0           | -0.16574333 | 0            | 0.001701791  |
| 0 | -0.99272877  | 0 | -0.12604559 | 0           | 0           | 0            | -0.011354407 |
| 0 | -0.93627889  | 0 | 0.013980247 | 0           | -0.13921049 | 0            | -0.006300861 |
| 0 | -0.96862148  | 0 | 0.006439451 | 0           | -0.15941945 | 0            | 0.003345174  |
| 0 | -0.93734184  | 0 | -0.13213172 | 0           | 0           | 0            | -0.007473371 |
| 0 | -0.09060959  | 0 | 0.023939511 | 0           | -0.16377573 | 0            | -0.007607254 |
| 0 | -0.086758278 | 0 | 0           | 0           | -0.1421624  | 0            | -0.007729324 |
| 0 | -0.08472285  | 0 | 0.024286469 | 0           | -0.16613709 | 0            | 0            |
| 0 | -0.99830622  | 0 | 0.01756435  | 0           | -0.14995509 | 0            | -0.009794391 |
| 0 | -0.081976735 | 0 | 0.024099155 | 0           | -0.16680717 | 0            | -0.008033156 |
| 0 | -0.97642695  | 0 | -0.14990456 | 0           | 0           | 0            | 0.004757502  |



|   |              |   |             |   |             |   |              |   |
|---|--------------|---|-------------|---|-------------|---|--------------|---|
| 0 | -0.085200547 | 0 | 0.021697883 | 0 | -0.16281849 | 0 | -0.009108335 | 0 |
| 0 | 0            | 0 | 0           | 0 | -0.1417406  | 0 | -0.006205765 | 0 |
| 0 | 0            | 0 | 0.023027187 | 0 | -0.16440268 | 0 | 0            | 0 |
| 0 | 0            | 0 | 0.023347483 | 0 | -0.16123381 | 0 | -0.006145002 | 0 |
| 0 | 0            | 0 | 0.022951298 | 0 | -0.16518916 | 0 | -0.006472941 | 0 |
| 0 | 0            | 0 | 0.020627991 | 0 | -0.16136951 | 0 | -0.007558636 | 0 |
| 0 | -0.083962031 | 0 | -0.13304759 | 0 | 0           | 0 | -0.009280971 | 0 |
| 0 | 0            | 0 | 0.017756293 | 0 | -0.15737098 | 0 | 0.000214979  | 0 |
| 0 | -0.087330578 | 0 | 0.02931487  | 0 | -0.16201115 | 0 | -0.012283992 | 0 |
| 0 | 0            | 0 | -0.13273917 | 0 | 0           | 0 | -0.007744468 | 0 |
| 0 | -1.0220307   | 0 | 0.005683029 | 0 | -0.14924664 | 0 | 0.020496893  | 0 |
| 0 | -0.006227759 | 0 | 0.012861485 | 0 | -0.15229818 | 0 | -0.00777378  | 0 |
| 0 | 0            | 0 | 0.013062711 | 0 | -0.15238417 | 0 | -0.006082362 | 0 |
| 0 | 0            | 0 | 0.028189846 | 0 | -0.16037161 | 0 | -0.01069424  | 0 |
| 0 | -0.039606959 | 0 | 0.009685141 | 0 | -0.17044076 | 0 | 0.006372903  | 0 |
| 0 | 0            | 0 | 0.009374426 | 0 | -0.16842196 | 0 | 0.007109965  | 0 |
| 0 | -0.92469913  | 0 | 0           | 0 | 0           | 0 | -0.012978176 | 0 |
| 0 | -0.93343575  | 0 | 0           | 0 | -0.14218746 | 0 | -0.006010132 | 0 |
| 0 | -0.93353901  | 0 | 0.022595443 | 0 | -0.16441974 | 0 | 0            | 0 |
| 0 | -0.93268659  | 0 | 0.022982517 | 0 | -0.16117276 | 0 | -0.005956579 | 0 |
| 0 | -0.93607002  | 0 | 0.022514311 | 0 | -0.16516039 | 0 | -0.006260823 | 0 |
| 0 | -0.93539064  | 0 | 0.020256154 | 0 | -0.1614642  | 0 | -0.00732621  | 0 |
| 0 | -0.93319313  | 0 | -0.13319745 | 0 | 0           | 0 | -0.007552803 | 0 |
| 0 | -0.99374716  | 0 | 0.026822581 | 0 | -0.16091029 | 0 | -0.009746871 | 0 |
| 0 | -0.93765355  | 0 | 0.012756694 | 0 | -0.15254697 | 0 | -0.005894335 | 0 |
| 0 | -0.97577443  | 0 | 0.009968475 | 0 | -0.16808784 | 0 | 0.006283784  | 0 |
| 0 | -0.087108191 | 0 | 0.023491597 | 0 | -0.16489011 | 0 | -0.007571188 | 0 |
| 0 | 0            | 0 | 0.022396534 | 0 | -0.16341021 | 0 | -0.00605606  | 0 |
| 0 | -0.93334176  | 0 | 0.02198476  | 0 | -0.16345866 | 0 | -0.005863426 | 0 |

SUPPLEMENTARY TABLE 10

| Model    | BIC     | Loglike  | H2r       | SE | bsnp_rs2938864 | SE | bsnp_rs1001646 |
|----------|---------|----------|-----------|----|----------------|----|----------------|
| cov5     | -1.4306 | -303.433 | 0.2597766 | 0  | 0              | 0  | 0              |
| cov0     | 0       | -307.663 | 0.2626804 | 0  | 0              | 0  | 0              |
| cov1     | 0.8567  | -304.577 | 0.2590686 | 0  | 0.091197927    | 0  | 0              |
| cov11    | 1.4741  | -304.885 | 0.2544497 | 0  | 0              | 0  | 0              |
| cov6     | 1.9252  | -305.111 | 0.2606798 | 0  | 0              | 0  | 0              |
| cov4     | 2.2166  | -305.257 | 0.2649583 | 0  | 0              | 0  | 0              |
| cov2     | 3.7423  | -306.019 | 0.2623812 | 0  | 0              | 0  | 0.065880492    |
| cov4_5   | 5.238   | -303.253 | 0.2575439 | 0  | 0              | 0  | 0              |
| cov5_11  | 5.2605  | -303.264 | 0.2573428 | 0  | 0              | 0  | 0              |
| cov2_5   | 5.3278  | -303.298 | 0.2595234 | 0  | 0              | 0  | -0.028163306   |
| cov3_5   | 5.3338  | -303.301 | 0.2620201 | 0  | 0              | 0  | 0              |
| cov5_10  | 5.4114  | -303.339 | 0.2582369 | 0  | 0              | 0  | 0              |
| cov5_8   | 5.5337  | -303.401 | 0.2599436 | 0  | 0              | 0  | 0              |
| cov5_7   | 5.5346  | -303.401 | 0.2599412 | 0  | 0              | 0  | 0              |
| cov5_9   | 5.5534  | -303.41  | 0.2589772 | 0  | 0              | 0  | 0              |
| cov1_5   | 5.5936  | -303.431 | 0.2598783 | 0  | -0.005161212   | 0  | 0              |
| cov5_6   | 5.5958  | -303.432 | 0.2597937 | 0  | 0              | 0  | 0              |
| cov10    | 6.3329  | -307.315 | 0.259755  | 0  | 0              | 0  | 0              |
| cov3     | 6.3722  | -307.334 | 0.2655268 | 0  | 0              | 0  | 0              |
| cov3_11  | 6.5501  | -303.909 | 0.2583453 | 0  | 0              | 0  | 0              |
| cov9     | 6.5526  | -307.425 | 0.2601171 | 0  | 0              | 0  | 0              |
| cov1_3   | 6.5772  | -303.922 | 0.2631156 | 0  | 0.096742584    | 0  | 0              |
| cov7     | 6.8904  | -307.594 | 0.2626594 | 0  | 0              | 0  | 0              |
| cov8     | 6.8907  | -307.594 | 0.2626608 | 0  | 0              | 0  | 0              |
| cov4_11  | 7.3535  | -304.311 | 0.2580591 | 0  | 0              | 0  | 0              |
| cov1_11  | 7.3733  | -304.32  | 0.2563336 | 0  | 0.060212575    | 0  | 0              |
| cov1_2   | 7.5778  | -304.423 | 0.257973  | 0  | 0.1237596      | 0  | -0.037972554   |
| cov1_4   | 7.5868  | -304.427 | 0.2607012 | 0  | 0.069562915    | 0  | 0              |
| cov1_9   | 7.6676  | -304.468 | 0.2604762 | 0  | 0.099766116    | 0  | 0              |
| cov3_6   | 7.6899  | -304.479 | 0.2646849 | 0  | 0              | 0  | 0              |
| cov1_10  | 7.8258  | -304.547 | 0.2597517 | 0  | 0.095431456    | 0  | 0              |
| cov6_11  | 7.8532  | -304.56  | 0.2563339 | 0  | 0              | 0  | 0              |
| cov1_8   | 7.8586  | -304.563 | 0.2591609 | 0  | 0.090689272    | 0  | 0              |
| cov1_7   | 7.8587  | -304.563 | 0.2591598 | 0  | 0.09068884     | 0  | 0              |
| cov1_6   | 7.8856  | -304.577 | 0.2590549 | 0  | 0.092316082    | 0  | 0              |
| cov7_11  | 8.0672  | -304.667 | 0.2543974 | 0  | 0              | 0  | 0              |
| cov8_11  | 8.0709  | -304.669 | 0.2544021 | 0  | 0              | 0  | 0              |
| cov4_6   | 8.15    | -304.709 | 0.2627411 | 0  | 0              | 0  | 0              |
| cov2_11  | 8.4069  | -304.837 | 0.2553067 | 0  | 0              | 0  | 0.015181975    |
| cov10_11 | 8.4848  | -304.876 | 0.2541515 | 0  | 0              | 0  | 0              |
| cov9_11  | 8.4986  | -304.883 | 0.2546087 | 0  | 0              | 0  | 0              |
| cov6_9   | 8.806   | -305.037 | 0.2620411 | 0  | 0              | 0  | 0              |
| cov6_7   | 8.8996  | -305.084 | 0.2607635 | 0  | 0              | 0  | 0              |
| cov6_8   | 8.9033  | -305.085 | 0.2607614 | 0  | 0              | 0  | 0              |
| cov6_10  | 8.925   | -305.096 | 0.2612414 | 0  | 0              | 0  | 0              |

|            |         |          |           |   |              |   |              |
|------------|---------|----------|-----------|---|--------------|---|--------------|
| cov2_6     | 8.9492  | -305.108 | 0.2607445 | 0 | 0            | 0 | 0.004176705  |
| cov4_10    | 8.9925  | -305.13  | 0.2631    | 0 | 0            | 0 | 0            |
| cov3_4     | 9.0281  | -305.148 | 0.2666611 | 0 | 0            | 0 | 0            |
| cov4_9     | 9.1433  | -305.205 | 0.2637011 | 0 | 0            | 0 | 0            |
| cov2_4     | 9.2378  | -305.253 | 0.2647903 | 0 | 0            | 0 | 0.005397076  |
| cov4_8     | 9.2391  | -305.253 | 0.2649589 | 0 | 0            | 0 | 0            |
| cov4_7     | 9.2394  | -305.253 | 0.2649583 | 0 | 0            | 0 | 0            |
| cov2_3     | 9.6542  | -305.461 | 0.2661835 | 0 | 0            | 0 | 0.070976054  |
| cov2_7     | 10.7036 | -305.986 | 0.2624368 | 0 | 0            | 0 | 0.065290795  |
| cov2_8     | 10.7037 | -305.986 | 0.2624382 | 0 | 0            | 0 | 0.065291835  |
| cov2_10    | 10.7506 | -306.009 | 0.2618983 | 0 | 0            | 0 | 0.063676135  |
| cov2_9     | 10.77   | -306.019 | 0.2625129 | 0 | 0            | 0 | 0.066462856  |
| cov5_9_10  | 11.552  | -302.895 | 0.259083  | 0 | 0            | 0 | 0            |
| cov3_5_11  | 11.6222 | -302.93  | 0.2596069 | 0 | 0            | 0 | 0            |
| cov2_5_11  | 11.6777 | -302.958 | 0.2556215 | 0 | 0            | 0 | -0.045328679 |
| cov2_5_10  | 11.832  | -303.035 | 0.2562715 | 0 | 0            | 0 | -0.046668676 |
| cov3_4_5   | 11.9017 | -303.07  | 0.2599682 | 0 | 0            | 0 | 0            |
| cov4_5_11  | 11.9574 | -303.098 | 0.2552792 | 0 | 0            | 0 | 0            |
| cov3_5_10  | 12.0127 | -303.126 | 0.2604046 | 0 | 0            | 0 | 0            |
| cov4_5_10  | 12.0426 | -303.141 | 0.2557032 | 0 | 0            | 0 | 0            |
| cov1_5_11  | 12.1104 | -303.174 | 0.256975  | 0 | -0.036014963 | 0 | 0            |
| cov4_5_8   | 12.1252 | -303.182 | 0.2575794 | 0 | 0            | 0 | 0            |
| cov4_5_7   | 12.1262 | -303.182 | 0.2575769 | 0 | 0            | 0 | 0            |
| cov2_5_9   | 12.1321 | -303.185 | 0.2573255 | 0 | 0            | 0 | -0.039983476 |
| cov5_8_11  | 12.1493 | -303.194 | 0.2572941 | 0 | 0            | 0 | 0            |
| cov5_7_11  | 12.1498 | -303.194 | 0.2572893 | 0 | 0            | 0 | 0            |
| cov5_6_11  | 12.1747 | -303.207 | 0.256735  | 0 | 0            | 0 | 0            |
| cov2_4_5   | 12.1966 | -303.218 | 0.2579244 | 0 | 0            | 0 | -0.016351301 |
| cov4_5_9   | 12.2058 | -303.222 | 0.2565416 | 0 | 0            | 0 | 0            |
| cov5_10_11 | 12.2099 | -303.224 | 0.2566717 | 0 | 0            | 0 | 0            |
| cov2_3_5   | 12.2192 | -303.229 | 0.2613142 | 0 | 0            | 0 | -0.021594087 |
| cov3_5_9   | 12.2333 | -303.236 | 0.2609614 | 0 | 0            | 0 | 0            |
| cov3_10    | 12.2554 | -306.761 | 0.2622591 | 0 | 0            | 0 | 0            |
| cov1_4_5   | 12.2577 | -303.248 | 0.2576683 | 0 | -0.007120483 | 0 | 0            |
| cov1_2_5   | 12.2588 | -303.249 | 0.2588031 | 0 | 0.029039973  | 0 | -0.04124934  |
| cov1_5_10  | 12.2588 | -303.249 | 0.2577139 | 0 | -0.039655224 | 0 | 0            |
| cov4_5_6   | 12.265  | -303.252 | 0.2575664 | 0 | 0            | 0 | 0            |
| cov2_5_8   | 12.2786 | -303.259 | 0.2597065 | 0 | 0            | 0 | -0.02888977  |
| cov2_5_7   | 12.2799 | -303.259 | 0.2597035 | 0 | 0            | 0 | -0.028872151 |
| cov5_9_11  | 12.2871 | -303.263 | 0.2572152 | 0 | 0            | 0 | 0            |
| cov2_5_6   | 12.3061 | -303.272 | 0.2593538 | 0 | 0            | 0 | -0.034817038 |
| cov5_6_10  | 12.3274 | -303.283 | 0.2575683 | 0 | 0            | 0 | 0            |
| cov1_3_5   | 12.3324 | -303.285 | 0.2620849 | 0 | 0.014280164  | 0 | 0            |
| cov3_5_6   | 12.3438 | -303.291 | 0.2621784 | 0 | 0            | 0 | 0            |
| cov3_5_7   | 12.3483 | -303.293 | 0.262395  | 0 | 0            | 0 | 0            |
| cov3_5_8   | 12.3496 | -303.294 | 0.2623743 | 0 | 0            | 0 | 0            |
| cov5_8_10  | 12.3934 | -303.316 | 0.2584384 | 0 | 0            | 0 | 0            |

|            |         |          |           |   |              |              |
|------------|---------|----------|-----------|---|--------------|--------------|
| cov5_7_10  | 12.3939 | -303.316 | 0.2584349 | 0 | 0            | 0            |
| cov1_5_9   | 12.5176 | -303.378 | 0.258659  | 0 | -0.02370422  | 0            |
| cov5_8_9   | 12.5262 | -303.382 | 0.2592053 | 0 | 0            | 0            |
| cov5_7_9   | 12.527  | -303.383 | 0.259201  | 0 | 0            | 0            |
| cov5_6_9   | 12.5438 | -303.391 | 0.2585708 | 0 | 0            | 0            |
| cov1_5_8   | 12.5536 | -303.396 | 0.260089  | 0 | -0.00704788  | 0            |
| cov1_5_7   | 12.5547 | -303.397 | 0.2600859 | 0 | -0.007021659 | 0            |
| cov5_6_8   | 12.5585 | -303.398 | 0.2599683 | 0 | 0            | 0            |
| cov5_6_7   | 12.5597 | -303.399 | 0.2599648 | 0 | 0            | 0            |
| cov5_7_8   | 12.5626 | -303.401 | 0.2599439 | 0 | 0            | 0            |
| cov3_9     | 12.5692 | -306.918 | 0.2625431 | 0 | 0            | 0            |
| cov1_5_6   | 12.6226 | -303.431 | 0.2598817 | 0 | -0.005272541 | 0            |
| cov1_3_11  | 12.656  | -303.447 | 0.2599557 | 0 | 0.054591816  | 0            |
| cov1_3_7   | 12.8841 | -303.561 | 0.2654664 | 0 | 0.10421743   | 0            |
| cov1_3_8   | 12.9005 | -303.569 | 0.2654069 | 0 | 0.1040657    | 0            |
| cov3_6_11  | 13.0356 | -303.637 | 0.260043  | 0 | 0            | 0            |
| cov9_10    | 13.0496 | -307.159 | 0.2603258 | 0 | 0            | 0            |
| cov3_4_11  | 13.1997 | -303.719 | 0.2599852 | 0 | 0            | 0            |
| cov7_10    | 13.2735 | -307.271 | 0.2598136 | 0 | 0            | 0            |
| cov8_10    | 13.2745 | -307.271 | 0.2598165 | 0 | 0            | 0            |
| cov1_2_3   | 13.3452 | -303.792 | 0.26206   | 0 | 0.12665089   | -0.034992917 |
| cov3_7     | 13.3507 | -307.309 | 0.266279  | 0 | 0            | 0            |
| cov3_8     | 13.3525 | -307.31  | 0.266258  | 0 | 0            | 0            |
| cov3_10_11 | 13.4065 | -303.822 | 0.2574498 | 0 | 0            | 0            |
| cov3_7_11  | 13.4567 | -303.848 | 0.2593028 | 0 | 0            | 0            |
| cov3_8_11  | 13.4592 | -303.849 | 0.2592812 | 0 | 0            | 0            |
| cov7_9     | 13.4846 | -307.376 | 0.2601898 | 0 | 0            | 0            |
| cov8_9     | 13.4854 | -307.376 | 0.2601915 | 0 | 0            | 0            |
| cov2_3_11  | 13.5112 | -303.875 | 0.2590504 | 0 | 0            | 0.01276643   |
| cov3_9_11  | 13.5437 | -303.891 | 0.2579061 | 0 | 0            | 0            |
| cov1_3_9   | 13.5502 | -303.894 | 0.2637684 | 0 | 0.10094028   | 0            |
| cov1_3_4   | 13.5912 | -303.915 | 0.2633442 | 0 | 0.091246337  | 0            |
| cov1_3_6   | 13.6053 | -303.922 | 0.2631482 | 0 | 0.094291076  | 0            |
| cov1_3_10  | 13.6062 | -303.922 | 0.2631087 | 0 | 0.096696533  | 0            |
| cov1_2_4   | 13.6997 | -303.969 | 0.2603178 | 0 | 0.11256202   | -0.075651495 |
| cov7_8     | 13.9194 | -307.593 | 0.2626599 | 0 | 0            | 0            |
| cov1_9_10  | 13.9673 | -304.103 | 0.2606866 | 0 | 0.10151852   | 0            |
| cov2_4_11  | 14.0059 | -304.122 | 0.2577895 | 0 | 0            | -0.041973496 |
| cov1_2_11  | 14.0308 | -304.135 | 0.2549783 | 0 | 0.094101662  | -0.041778362 |
| cov1_4_11  | 14.0894 | -304.164 | 0.2579442 | 0 | 0.037655386  | 0            |
| cov3_6_8   | 14.1823 | -304.21  | 0.2668796 | 0 | 0            | 0            |
| cov3_6_7   | 14.1888 | -304.214 | 0.2668886 | 0 | 0            | 0            |
| cov1_9_11  | 14.2063 | -304.222 | 0.257686  | 0 | 0.068983415  | 0            |
| cov4_7_11  | 14.2116 | -304.225 | 0.257662  | 0 | 0            | 0            |
| cov4_8_11  | 14.2123 | -304.225 | 0.2576695 | 0 | 0            | 0            |
| cov1_7_11  | 14.2544 | -304.246 | 0.2561365 | 0 | 0.05402222   | 0            |
| cov1_8_11  | 14.2553 | -304.247 | 0.2561417 | 0 | 0.054083929  | 0            |

|            |         |          |           |   |             |              |
|------------|---------|----------|-----------|---|-------------|--------------|
| cov4_6_11  | 14.2779 | -304.258 | 0.2583616 | 0 | 0           | 0            |
| cov1_10_11 | 14.3563 | -304.297 | 0.256951  | 0 | 0.064309719 | 0            |
| cov4_10_11 | 14.3598 | -304.299 | 0.2577237 | 0 | 0           | 0            |
| cov4_9_11  | 14.379  | -304.309 | 0.2582023 | 0 | 0           | 0            |
| cov1_6_11  | 14.3948 | -304.317 | 0.2562029 | 0 | 0.066935461 | 0            |
| cov1_2_9   | 14.4106 | -304.325 | 0.2593905 | 0 | 0.13075028  | -0.036639406 |
| cov3_4_6   | 14.4254 | -304.332 | 0.2653712 | 0 | 0           | 0            |
| cov1_4_9   | 14.5017 | -304.37  | 0.2615069 | 0 | 0.07952998  | 0            |
| cov1_2_10  | 14.5608 | -304.4   | 0.2586176 | 0 | 0.12678392  | -0.037165945 |
| cov1_2_8   | 14.5826 | -304.411 | 0.2580689 | 0 | 0.12312664  | -0.037794653 |
| cov1_2_7   | 14.5829 | -304.411 | 0.2580679 | 0 | 0.12312364  | -0.037790548 |
| cov1_4_10  | 14.6042 | -304.421 | 0.2609346 | 0 | 0.072628777 | 0            |
| cov1_4_8   | 14.6042 | -304.421 | 0.2607227 | 0 | 0.069682279 | 0            |
| cov1_4_7   | 14.6045 | -304.421 | 0.2607215 | 0 | 0.069684741 | 0            |
| cov1_2_6   | 14.6068 | -304.423 | 0.2579821 | 0 | 0.12289911  | -0.038005896 |
| cov1_4_6   | 14.6146 | -304.427 | 0.2606642 | 0 | 0.072455551 | 0            |
| cov6_7_11  | 14.6342 | -304.436 | 0.2560546 | 0 | 0           | 0            |
| cov6_8_11  | 14.6398 | -304.439 | 0.2560556 | 0 | 0           | 0            |
| cov1_8_9   | 14.659  | -304.449 | 0.2606405 | 0 | 0.099386306 | 0            |
| cov1_7_9   | 14.6596 | -304.449 | 0.2606371 | 0 | 0.09937996  | 0            |
| cov3_6_9   | 14.6934 | -304.466 | 0.2652112 | 0 | 0           | 0            |
| cov1_6_9   | 14.6941 | -304.466 | 0.260552  | 0 | 0.095725936 | 0            |
| cov2_3_6   | 14.7049 | -304.472 | 0.2648088 | 0 | 0           | 0.006923813  |
| cov3_6_10  | 14.7139 | -304.476 | 0.2644713 | 0 | 0           | 0            |
| cov6_9_11  | 14.7467 | -304.493 | 0.2575918 | 0 | 0           | 0            |
| cov9_10_11 | 14.7661 | -304.502 | 0.2546709 | 0 | 0           | 0            |
| cov1_8_10  | 14.8221 | -304.53  | 0.2598957 | 0 | 0.095074062 | 0            |
| cov1_7_10  | 14.8225 | -304.53  | 0.2598922 | 0 | 0.095067562 | 0            |
| cov2_6_11  | 14.8445 | -304.541 | 0.2559804 | 0 | 0           | -0.011686672 |
| cov1_6_10  | 14.8546 | -304.547 | 0.259779  | 0 | 0.093893259 | 0            |
| cov2_4_6   | 14.8548 | -304.547 | 0.2632326 | 0 | 0           | -0.041208093 |
| cov6_10_11 | 14.8618 | -304.55  | 0.2567929 | 0 | 0           | 0            |
| cov1_6_8   | 14.8876 | -304.563 | 0.2591516 | 0 | 0.091442416 | 0            |
| cov1_7_8   | 14.8876 | -304.563 | 0.2591627 | 0 | 0.090686576 | 0            |
| cov1_6_7   | 14.8878 | -304.563 | 0.259152  | 0 | 0.091319936 | 0            |
| cov2_7_11  | 15.0618 | -304.65  | 0.2549251 | 0 | 0           | 0.009256537  |
| cov2_8_11  | 15.065  | -304.652 | 0.254933  | 0 | 0           | 0.009314131  |
| cov7_9_11  | 15.0709 | -304.655 | 0.2547879 | 0 | 0           | 0            |
| cov8_9_11  | 15.0744 | -304.656 | 0.254794  | 0 | 0           | 0            |
| cov7_10_11 | 15.094  | -304.666 | 0.2542893 | 0 | 0           | 0            |
| cov7_8_11  | 15.0963 | -304.667 | 0.2543969 | 0 | 0           | 0            |
| cov8_10_11 | 15.0978 | -304.668 | 0.254295  | 0 | 0           | 0            |
| cov4_6_9   | 15.1402 | -304.689 | 0.2633724 | 0 | 0           | 0            |
| cov6_9_10  | 15.157  | -304.698 | 0.2622663 | 0 | 0           | 0            |
| cov4_6_7   | 15.1643 | -304.701 | 0.2627465 | 0 | 0           | 0            |
| cov4_6_8   | 15.1652 | -304.702 | 0.2627479 | 0 | 0           | 0            |
| cov4_6_10  | 15.1785 | -304.708 | 0.2626676 | 0 | 0           | 0            |

|              |         |          |           |   |              |   |              |
|--------------|---------|----------|-----------|---|--------------|---|--------------|
| cov2_9_11    | 15.412  | -304.825 | 0.2557908 | 0 | 0            | 0 | 0.017241837  |
| cov2_10_11   | 15.4328 | -304.836 | 0.2551406 | 0 | 0            | 0 | 0.014435349  |
| cov4_9_10    | 15.4386 | -304.839 | 0.2639756 | 0 | 0            | 0 | 0            |
| cov3_4_10    | 15.6208 | -304.93  | 0.2646699 | 0 | 0            | 0 | 0            |
| cov6_7_9     | 15.7667 | -305.003 | 0.2622196 | 0 | 0            | 0 | 0            |
| cov6_8_9     | 15.7709 | -305.005 | 0.2622149 | 0 | 0            | 0 | 0            |
| cov2_6_9     | 15.8249 | -305.032 | 0.2621491 | 0 | 0            | 0 | 0.005890894  |
| cov3_4_9     | 15.8397 | -305.039 | 0.265142  | 0 | 0            | 0 | 0            |
| cov6_7_10    | 15.8931 | -305.066 | 0.261397  | 0 | 0            | 0 | 0            |
| cov6_8_10    | 15.8971 | -305.068 | 0.2613928 | 0 | 0            | 0 | 0            |
| cov6_7_8     | 15.9212 | -305.08  | 0.2607567 | 0 | 0            | 0 | 0            |
| cov2_6_7     | 15.9243 | -305.081 | 0.2608233 | 0 | 0            | 0 | 0.003868966  |
| cov2_6_8     | 15.9278 | -305.083 | 0.2608218 | 0 | 0            | 0 | 0.003937988  |
| cov2_6_10    | 15.9468 | -305.093 | 0.2613373 | 0 | 0            | 0 | 0.004999658  |
| cov2_3_4     | 15.9504 | -305.094 | 0.2665467 | 0 | 0            | 0 | 0.022149147  |
| cov3_4_7     | 15.9649 | -305.102 | 0.267669  | 0 | 0            | 0 | 0            |
| cov3_4_8     | 15.9685 | -305.103 | 0.2676375 | 0 | 0            | 0 | 0            |
| cov2_4_10    | 15.9985 | -305.118 | 0.263115  | 0 | 0            | 0 | -0.010338451 |
| cov4_8_10    | 16.0197 | -305.129 | 0.2631099 | 0 | 0            | 0 | 0            |
| cov4_7_10    | 16.0198 | -305.129 | 0.263109  | 0 | 0            | 0 | 0            |
| cov2_4_9     | 16.1688 | -305.204 | 0.2637049 | 0 | 0            | 0 | -0.004087272 |
| cov4_8_9     | 16.169  | -305.204 | 0.2637154 | 0 | 0            | 0 | 0            |
| cov4_7_9     | 16.1691 | -305.204 | 0.2637142 | 0 | 0            | 0 | 0            |
| cov2_4_8     | 16.2591 | -305.249 | 0.2647788 | 0 | 0            | 0 | 0.005803338  |
| cov2_4_7     | 16.2595 | -305.249 | 0.2647782 | 0 | 0            | 0 | 0.005801675  |
| cov4_7_8     | 16.2677 | -305.253 | 0.2649606 | 0 | 0            | 0 | 0            |
| cov2_3_7     | 16.2884 | -305.263 | 0.2682149 | 0 | 0            | 0 | 0.075740576  |
| cov2_3_8     | 16.2973 | -305.268 | 0.2681671 | 0 | 0            | 0 | 0.075651925  |
| cov2_3_10    | 16.5364 | -305.387 | 0.2650231 | 0 | 0            | 0 | 0.065380143  |
| cov2_3_9     | 16.6485 | -305.443 | 0.2655692 | 0 | 0            | 0 | 0.068139996  |
| cov2_9_10    | 17.236  | -305.737 | 0.262774  | 0 | 0            | 0 | 0.066820612  |
| cov2_7_10    | 17.717  | -305.978 | 0.2620087 | 0 | 0            | 0 | 0.063389382  |
| cov2_8_10    | 17.7172 | -305.978 | 0.2620114 | 0 | 0            | 0 | 0.06339698   |
| cov2_7_9     | 17.7296 | -305.984 | 0.2626396 | 0 | 0            | 0 | 0.066163966  |
| cov2_8_9     | 17.7297 | -305.984 | 0.2626427 | 0 | 0            | 0 | 0.066171952  |
| cov2_7_8     | 17.7326 | -305.986 | 0.2624385 | 0 | 0            | 0 | 0.06529226   |
| cov2_5_9_10  | 17.9888 | -302.599 | 0.2571104 | 0 | 0            | 0 | -0.046037764 |
| cov4_5_9_10  | 18.1402 | -302.675 | 0.2564321 | 0 | 0            | 0 | 0            |
| cov3_5_9_10  | 18.1623 | -302.686 | 0.2612608 | 0 | 0            | 0 | 0            |
| cov3_4_5_11  | 18.1721 | -302.691 | 0.2574845 | 0 | 0            | 0 | 0            |
| cov2_3_5_11  | 18.248  | -302.729 | 0.2579006 | 0 | 0            | 0 | -0.037535433 |
| cov5_9_10_11 | 18.288  | -302.749 | 0.2573216 | 0 | 0            | 0 | 0            |
| cov2_5_10_11 | 18.3342 | -302.772 | 0.2533425 | 0 | 0            | 0 | -0.059192317 |
| cov1_5_9_10  | 18.4624 | -302.836 | 0.2586305 | 0 | -0.032167226 | 0 | 0            |
| cov3_5_10_11 | 18.4628 | -302.836 | 0.2586717 | 0 | 0            | 0 | 0            |
| cov2_5_8_11  | 18.4773 | -302.843 | 0.2554471 | 0 | 0            | 0 | -0.048920742 |
| cov2_5_7_11  | 18.4779 | -302.844 | 0.2554414 | 0 | 0            | 0 | -0.048915774 |

|              |         |          |           |   |              |   |              |
|--------------|---------|----------|-----------|---|--------------|---|--------------|
| cov3_4_5_10  | 18.4819 | -302.846 | 0.2578426 | 0 | 0            | 0 | 0            |
| cov5_6_9_10  | 18.5118 | -302.861 | 0.2585315 | 0 | 0            | 0 | 0            |
| cov5_8_9_10  | 18.5341 | -302.872 | 0.2592992 | 0 | 0            | 0 | 0            |
| cov5_7_9_10  | 18.5347 | -302.872 | 0.2592953 | 0 | 0            | 0 | 0            |
| cov2_5_9_11  | 18.5851 | -302.897 | 0.2542856 | 0 | 0            | 0 | -0.052972194 |
| cov3_5_7_11  | 18.6066 | -302.908 | 0.2601775 | 0 | 0            | 0 | 0            |
| cov3_5_8_11  | 18.6086 | -302.909 | 0.2601569 | 0 | 0            | 0 | 0            |
| cov3_5_9_11  | 18.6152 | -302.912 | 0.2591619 | 0 | 0            | 0 | 0            |
| cov1_3_5_11  | 18.6167 | -302.913 | 0.2593098 | 0 | -0.016618018 | 0 | 0            |
| cov2_3_5_10  | 18.6207 | -302.915 | 0.2582286 | 0 | 0            | 0 | -0.039867679 |
| cov3_5_6_11  | 18.6231 | -302.916 | 0.2592166 | 0 | 0            | 0 | 0            |
| cov2_4_5_11  | 18.6702 | -302.94  | 0.2550645 | 0 | 0            | 0 | -0.038407996 |
| cov2_5_6_11  | 18.705  | -302.957 | 0.2555819 | 0 | 0            | 0 | -0.044316058 |
| cov1_2_5_11  | 18.7067 | -302.958 | 0.2556243 | 0 | -0.000730847 | 0 | -0.045063289 |
| cov1_5_10_11 | 18.73   | -302.97  | 0.2545644 | 0 | -0.074001978 | 0 | 0            |
| cov4_5_8_11  | 18.7455 | -302.977 | 0.2549569 | 0 | 0            | 0 | 0            |
| cov4_5_7_11  | 18.7456 | -302.977 | 0.2549494 | 0 | 0            | 0 | 0            |
| cov3_4_5_9   | 18.7468 | -302.978 | 0.2585361 | 0 | 0            | 0 | 0            |
| cov2_4_5_10  | 18.7831 | -302.996 | 0.2553686 | 0 | 0            | 0 | -0.037060958 |
| cov1_4_5_11  | 18.7939 | -303.002 | 0.25485   | 0 | -0.037318401 | 0 | 0            |
| cov2_5_8_10  | 18.8102 | -303.01  | 0.2564769 | 0 | 0            | 0 | -0.046816767 |
| cov2_5_7_10  | 18.8108 | -303.01  | 0.2564751 | 0 | 0            | 0 | -0.046814875 |
| cov1_4_5_10  | 18.8238 | -303.017 | 0.2548175 | 0 | -0.046567316 | 0 | 0            |
| cov2_5_6_10  | 18.8537 | -303.032 | 0.2561635 | 0 | 0            | 0 | -0.04489222  |
| cov1_2_5_10  | 18.8584 | -303.034 | 0.2562673 | 0 | -0.005495446 | 0 | -0.044940588 |
| cov3_7_10    | 18.8632 | -306.551 | 0.2637173 | 0 | 0            | 0 | 0            |
| cov3_8_10    | 18.8693 | -306.554 | 0.2636841 | 0 | 0            | 0 | 0            |
| cov4_5_10_11 | 18.8772 | -303.043 | 0.2543745 | 0 | 0            | 0 | 0            |
| cov4_5_6_11  | 18.8833 | -303.046 | 0.2547781 | 0 | 0            | 0 | 0            |
| cov1_3_4_5   | 18.8955 | -303.052 | 0.2600341 | 0 | 0.015374452  | 0 | 0            |
| cov3_4_5_6   | 18.8979 | -303.054 | 0.2601182 | 0 | 0            | 0 | 0            |
| cov1_5_8_11  | 18.9037 | -303.057 | 0.2568202 | 0 | -0.045829474 | 0 | 0            |
| cov1_5_7_11  | 18.904  | -303.057 | 0.2568152 | 0 | -0.045843804 | 0 | 0            |
| cov3_5_7_10  | 18.909  | -303.059 | 0.2611982 | 0 | 0            | 0 | 0            |
| cov3_5_8_10  | 18.9132 | -303.061 | 0.2611712 | 0 | 0            | 0 | 0            |
| cov3_4_5_7   | 18.93   | -303.07  | 0.2600682 | 0 | 0            | 0 | 0            |
| cov3_4_5_8   | 18.9302 | -303.07  | 0.2600528 | 0 | 0            | 0 | 0            |
| cov2_3_4_5   | 18.9308 | -303.07  | 0.2599674 | 0 | 0            | 0 | -0.000191313 |
| cov4_5_6_10  | 18.9448 | -303.077 | 0.2549839 | 0 | 0            | 0 | 0            |
| cov5_6_10_11 | 18.9459 | -303.078 | 0.2548359 | 0 | 0            | 0 | 0            |
| cov4_5_8_10  | 18.9556 | -303.082 | 0.255819  | 0 | 0            | 0 | 0            |
| cov4_5_7_10  | 18.956  | -303.083 | 0.2558146 | 0 | 0            | 0 | 0            |
| cov3_9_10    | 18.9582 | -306.598 | 0.2628655 | 0 | 0            | 0 | 0            |
| cov2_3_5_9   | 18.96   | -303.085 | 0.2591367 | 0 | 0            | 0 | -0.033677128 |
| cov4_5_9_11  | 18.9781 | -303.094 | 0.255017  | 0 | 0            | 0 | 0            |
| cov1_3_5_10  | 19.001  | -303.105 | 0.2598856 | 0 | -0.020172559 | 0 | 0            |
| cov3_5_6_10  | 19.0113 | -303.11  | 0.2598958 | 0 | 0            | 0 | 0            |

|              |         |          |           |   |              |   |              |
|--------------|---------|----------|-----------|---|--------------|---|--------------|
| cov1_5_9_11  | 19.0146 | -303.112 | 0.2555995 | 0 | -0.056845518 | 0 | 0            |
| cov5_6_8_11  | 19.0163 | -303.113 | 0.2565632 | 0 | 0            | 0 | 0            |
| cov5_6_7_11  | 19.0191 | -303.114 | 0.2565635 | 0 | 0            | 0 | 0            |
| cov1_2_3_5   | 19.0336 | -303.121 | 0.260929  | 0 | 0.04559571   | 0 | -0.039239816 |
| cov2_4_5_9   | 19.0584 | -303.134 | 0.2562995 | 0 | 0            | 0 | -0.028917616 |
| cov2_4_5_8   | 19.0935 | -303.151 | 0.2579238 | 0 | 0            | 0 | -0.015212047 |
| cov2_4_5_7   | 19.0947 | -303.152 | 0.2579182 | 0 | 0            | 0 | -0.015186778 |
| cov2_5_8_9   | 19.1009 | -303.155 | 0.2575568 | 0 | 0            | 0 | -0.040170125 |
| cov2_5_7_9   | 19.1017 | -303.156 | 0.2575525 | 0 | 0            | 0 | -0.040168495 |
| cov4_5_8_9   | 19.1064 | -303.158 | 0.2566776 | 0 | 0            | 0 | 0            |
| cov4_5_7_9   | 19.1071 | -303.158 | 0.256672  | 0 | 0            | 0 | 0            |
| cov5_8_10_11 | 19.1264 | -303.168 | 0.2567453 | 0 | 0            | 0 | 0            |
| cov5_7_10_11 | 19.1266 | -303.168 | 0.25674   | 0 | 0            | 0 | 0            |
| cov1_4_5_9   | 19.1334 | -303.171 | 0.2559827 | 0 | -0.029781859 | 0 | 0            |
| cov1_5_6_11  | 19.1343 | -303.172 | 0.2568561 | 0 | -0.030412206 | 0 | 0            |
| cov1_4_5_8   | 19.1351 | -303.172 | 0.2577613 | 0 | -0.010225469 | 0 | 0            |
| cov1_4_5_7   | 19.1363 | -303.173 | 0.2577579 | 0 | -0.010197441 | 0 | 0            |
| cov2_3_5_6   | 19.1427 | -303.176 | 0.2614345 | 0 | 0            | 0 | -0.030050211 |
| cov5_6_9_11  | 19.1454 | -303.177 | 0.2557899 | 0 | 0            | 0 | 0            |
| cov4_5_6_8   | 19.15   | -303.18  | 0.2576141 | 0 | 0            | 0 | 0            |
| cov4_5_6_7   | 19.1513 | -303.18  | 0.2576098 | 0 | 0            | 0 | 0            |
| cov1_2_5_9   | 19.1534 | -303.181 | 0.2573356 | 0 | 0.009445531  | 0 | -0.042971119 |
| cov4_5_7_8   | 19.1543 | -303.182 | 0.2575798 | 0 | 0            | 0 | 0            |
| cov2_5_6_9   | 19.1605 | -303.185 | 0.2573623 | 0 | 0            | 0 | -0.040552973 |
| cov5_7_8_11  | 19.1783 | -303.194 | 0.2572928 | 0 | 0            | 0 | 0            |
| cov5_8_9_11  | 19.1784 | -303.194 | 0.257313  | 0 | 0            | 0 | 0            |
| cov5_7_9_11  | 19.1788 | -303.194 | 0.257307  | 0 | 0            | 0 | 0            |
| cov4_5_6_9   | 19.1898 | -303.2   | 0.2561007 | 0 | 0            | 0 | 0            |
| cov3_5_7_9   | 19.1905 | -303.2   | 0.2615377 | 0 | 0            | 0 | 0            |
| cov3_5_8_9   | 19.1935 | -303.201 | 0.2615149 | 0 | 0            | 0 | 0            |
| cov1_2_4_5   | 19.2071 | -303.208 | 0.2578692 | 0 | 0.014439616  | 0 | -0.02508415  |
| cov2_4_5_6   | 19.2122 | -303.211 | 0.2579622 | 0 | 0            | 0 | -0.020942874 |
| cov1_2_5_8   | 19.2235 | -303.216 | 0.2590217 | 0 | 0.027005028  | 0 | -0.040993329 |
| cov1_2_5_7   | 19.2247 | -303.217 | 0.2590184 | 0 | 0.027026659  | 0 | -0.040985605 |
| cov1_5_8_10  | 19.23   | -303.22  | 0.2579155 | 0 | -0.040871199 | 0 | 0            |
| cov1_5_7_10  | 19.2305 | -303.22  | 0.2579119 | 0 | -0.040878072 | 0 | 0            |
| cov1_3_7_11  | 19.2395 | -303.224 | 0.2622112 | 0 | 0.06648519   | 0 | 0            |
| cov2_3_5_8   | 19.2478 | -303.229 | 0.2612273 | 0 | 0            | 0 | -0.022061817 |
| cov2_3_5_7   | 19.248  | -303.229 | 0.2612469 | 0 | 0            | 0 | -0.021956181 |
| cov1_3_8_11  | 19.2496 | -303.229 | 0.2621534 | 0 | 0.066211829  | 0 | 0            |
| cov3_5_6_9   | 19.2603 | -303.235 | 0.2608243 | 0 | 0            | 0 | 0            |
| cov1_3_5_9   | 19.2608 | -303.235 | 0.2608557 | 0 | -0.004023593 | 0 | 0            |
| cov2_5_6_8   | 19.2612 | -303.235 | 0.2595378 | 0 | 0            | 0 | -0.035239525 |
| cov2_5_6_7   | 19.2616 | -303.235 | 0.2595364 | 0 | 0            | 0 | -0.035280049 |
| cov3_7_9     | 19.2672 | -306.753 | 0.2638228 | 0 | 0            | 0 | 0            |
| cov3_8_9     | 19.2724 | -306.755 | 0.2637924 | 0 | 0            | 0 | 0            |
| cov1_5_6_10  | 19.2797 | -303.245 | 0.257568  | 0 | -0.032970595 | 0 | 0            |



|              |         |          |           |   |              |   |              |
|--------------|---------|----------|-----------|---|--------------|---|--------------|
| cov1_4_5_6   | 19.2852 | -303.247 | 0.2576964 | 0 | -0.010401927 | 0 | 0            |
| cov1_3_5_7   | 19.2868 | -303.248 | 0.2631874 | 0 | 0.030327941  | 0 | 0            |
| cov1_2_5_6   | 19.2871 | -303.248 | 0.2588317 | 0 | 0.026786547  | 0 | -0.04133544  |
| cov1_3_5_8   | 19.2911 | -303.25  | 0.2631393 | 0 | 0.029720322  | 0 | 0            |
| cov2_5_7_8   | 19.3074 | -303.258 | 0.2597067 | 0 | 0            | 0 | -0.028896115 |
| cov5_6_8_10  | 19.3084 | -303.259 | 0.2577682 | 0 | 0            | 0 | 0            |
| cov5_6_7_10  | 19.3099 | -303.26  | 0.2577649 | 0 | 0            | 0 | 0            |
| cov3_5_6_7   | 19.3359 | -303.273 | 0.262927  | 0 | 0            | 0 | 0            |
| cov3_5_6_8   | 19.3375 | -303.273 | 0.2629065 | 0 | 0            | 0 | 0            |
| cov1_2_3_11  | 19.3511 | -303.28  | 0.2586683 | 0 | 0.086794078  | 0 | -0.039626124 |
| cov1_3_5_6   | 19.361  | -303.285 | 0.2621122 | 0 | 0.012512815  | 0 | 0            |
| cov3_5_7_8   | 19.3758 | -303.293 | 0.2624011 | 0 | 0            | 0 | 0            |
| cov5_7_8_10  | 19.4224 | -303.316 | 0.2584388 | 0 | 0            | 0 | 0            |
| cov1_5_8_9   | 19.4833 | -303.346 | 0.2588793 | 0 | -0.025018225 | 0 | 0            |
| cov1_5_7_9   | 19.484  | -303.347 | 0.2588749 | 0 | -0.025023883 | 0 | 0            |
| cov5_6_8_9   | 19.5158 | -303.363 | 0.2587951 | 0 | 0            | 0 | 0            |
| cov5_6_7_9   | 19.5172 | -303.363 | 0.2587928 | 0 | 0            | 0 | 0            |
| cov1_5_6_9   | 19.5443 | -303.377 | 0.2585775 | 0 | -0.020105538 | 0 | 0            |
| cov5_7_8_9   | 19.5553 | -303.382 | 0.2592061 | 0 | 0            | 0 | 0            |
| cov1_5_6_8   | 19.5826 | -303.396 | 0.2600989 | 0 | -0.007765885 | 0 | 0            |
| cov1_5_7_8   | 19.5826 | -303.396 | 0.2600893 | 0 | -0.007050905 | 0 | 0            |
| cov1_5_6_7   | 19.5836 | -303.396 | 0.2600985 | 0 | -0.007934997 | 0 | 0            |
| cov5_6_7_8   | 19.5873 | -303.398 | 0.2599692 | 0 | 0            | 0 | 0            |
| cov3_9_10_11 | 19.5945 | -303.402 | 0.258109  | 0 | 0            | 0 | 0            |
| cov1_3_9_11  | 19.6601 | -303.435 | 0.26043   | 0 | 0.057951983  | 0 | 0            |
| cov1_2_3_7   | 19.6634 | -303.436 | 0.264406  | 0 | 0.13342536   | 0 | -0.034241641 |
| cov1_3_10_11 | 19.6764 | -303.443 | 0.2596954 | 0 | 0.052666625  | 0 | 0            |
| cov1_2_3_8   | 19.6801 | -303.445 | 0.2643472 | 0 | 0.13325979   | 0 | -0.034226862 |
| cov1_3_6_11  | 19.6811 | -303.445 | 0.2598556 | 0 | 0.059494227  | 0 | 0            |
| cov1_3_4_11  | 19.6818 | -303.446 | 0.2600753 | 0 | 0.052207328  | 0 | 0            |
| cov1_3_9_10  | 19.7125 | -303.461 | 0.2641718 | 0 | 0.10292676   | 0 | 0            |
| cov3_6_8_11  | 19.7656 | -303.487 | 0.2618961 | 0 | 0            | 0 | 0            |
| cov3_6_7_11  | 19.7661 | -303.488 | 0.2619064 | 0 | 0            | 0 | 0            |
| cov1_3_7_10  | 19.8424 | -303.526 | 0.2649819 | 0 | 0.10030785   | 0 | 0            |
| cov1_3_8_10  | 19.8602 | -303.535 | 0.2649246 | 0 | 0.1001891    | 0 | 0            |
| cov1_3_4_7   | 19.9081 | -303.559 | 0.2653673 | 0 | 0.10762223   | 0 | 0            |
| cov1_3_7_8   | 19.9119 | -303.561 | 0.2654716 | 0 | 0.10422384   | 0 | 0            |
| cov1_3_6_7   | 19.9128 | -303.561 | 0.2654869 | 0 | 0.1027189    | 0 | 0            |
| cov1_3_7_9   | 19.9132 | -303.561 | 0.2654615 | 0 | 0.10418489   | 0 | 0            |
| cov1_3_4_8   | 19.925  | -303.567 | 0.2653117 | 0 | 0.10731744   | 0 | 0            |
| cov1_3_6_8   | 19.9288 | -303.569 | 0.2654404 | 0 | 0.10170225   | 0 | 0            |
| cov1_3_8_9   | 19.9296 | -303.569 | 0.2654076 | 0 | 0.10407068   | 0 | 0            |
| cov3_4_6_11  | 19.9847 | -303.597 | 0.2605598 | 0 | 0            | 0 | 0            |
| cov7_9_10    | 19.9892 | -307.114 | 0.260392  | 0 | 0            | 0 | 0            |
| cov8_9_10    | 19.9901 | -307.114 | 0.2603946 | 0 | 0            | 0 | 0            |
| cov2_3_6_11  | 20.0226 | -303.616 | 0.2596811 | 0 | 0            | 0 | -0.012334891 |
| cov3_6_10_11 | 20.0371 | -303.623 | 0.2595165 | 0 | 0            | 0 | 0            |

|              |         |          |           |   |             |   |              |
|--------------|---------|----------|-----------|---|-------------|---|--------------|
| cov1_2_4_11  | 20.0554 | -303.632 | 0.2571879 | 0 | 0.079830722 | 0 | -0.081775668 |
| cov3_6_9_11  | 20.0579 | -303.634 | 0.2603239 | 0 | 0           | 0 | 0            |
| cov3_4_10_11 | 20.0849 | -303.647 | 0.2591218 | 0 | 0           | 0 | 0            |
| cov3_4_7_11  | 20.1017 | -303.656 | 0.2609934 | 0 | 0           | 0 | 0            |
| cov3_4_8_11  | 20.1048 | -303.657 | 0.2609675 | 0 | 0           | 0 | 0            |
| cov1_2_3_4   | 20.1335 | -303.671 | 0.2625254 | 0 | 0.11949905  | 0 | -0.057540583 |
| cov2_3_4_11  | 20.1489 | -303.679 | 0.2596914 | 0 | 0           | 0 | -0.020386179 |
| cov3_7_10_11 | 20.1509 | -303.68  | 0.2585418 | 0 | 0           | 0 | 0            |
| cov3_8_10_11 | 20.1552 | -303.682 | 0.2585145 | 0 | 0           | 0 | 0            |
| cov3_4_9_11  | 20.2061 | -303.708 | 0.2596157 | 0 | 0           | 0 | 0            |
| cov7_8_10    | 20.3026 | -307.271 | 0.2598132 | 0 | 0           | 0 | 0            |
| cov1_2_3_9   | 20.3268 | -303.768 | 0.2626964 | 0 | 0.13004914  | 0 | -0.034444112 |
| cov2_3_7_11  | 20.3635 | -303.786 | 0.2604992 | 0 | 0           | 0 | 0.017584902  |
| cov2_3_8_11  | 20.3672 | -303.788 | 0.2604657 | 0 | 0           | 0 | 0.017488461  |
| cov1_2_3_6   | 20.3716 | -303.79  | 0.2621101 | 0 | 0.12254358  | 0 | -0.035147895 |
| cov1_2_3_10  | 20.3736 | -303.791 | 0.2619869 | 0 | 0.12627378  | 0 | -0.035083033 |
| cov3_7_9_11  | 20.3765 | -303.793 | 0.2588025 | 0 | 0           | 0 | 0            |
| cov3_7_8     | 20.3793 | -307.309 | 0.2662816 | 0 | 0           | 0 | 0            |
| cov3_8_9_11  | 20.3799 | -303.795 | 0.2587793 | 0 | 0           | 0 | 0            |
| cov2_3_10_11 | 20.4125 | -303.811 | 0.2579836 | 0 | 0           | 0 | 0.007741686  |
| cov1_9_10_11 | 20.4592 | -303.834 | 0.2577574 | 0 | 0.069341458 | 0 | 0            |
| cov3_7_8_11  | 20.4856 | -303.847 | 0.2593045 | 0 | 0           | 0 | 0            |
| cov7_8_9     | 20.5137 | -307.376 | 0.2601894 | 0 | 0           | 0 | 0            |
| cov2_3_9_11  | 20.5255 | -303.867 | 0.2586668 | 0 | 0           | 0 | 0.011066336  |
| cov1_3_4_9   | 20.5733 | -303.891 | 0.2638724 | 0 | 0.097118776 | 0 | 0            |
| cov1_3_6_9   | 20.5755 | -303.892 | 0.2638632 | 0 | 0.095997255 | 0 | 0            |
| cov4_9_10_11 | 20.5864 | -303.898 | 0.2583352 | 0 | 0           | 0 | 0            |
| cov1_3_4_10  | 20.6195 | -303.914 | 0.263285  | 0 | 0.090548923 | 0 | 0            |
| cov1_3_4_6   | 20.6197 | -303.915 | 0.263368  | 0 | 0.089444098 | 0 | 0            |
| cov1_3_6_10  | 20.6344 | -303.922 | 0.2631523 | 0 | 0.094294989 | 0 | 0            |
| cov1_2_9_10  | 20.6616 | -303.935 | 0.2594832 | 0 | 0.13512968  | 0 | -0.039676394 |
| cov2_4_6_11  | 20.6681 | -303.939 | 0.2582802 | 0 | 0           | 0 | -0.059200699 |
| cov1_2_4_9   | 20.7082 | -303.959 | 0.2607127 | 0 | 0.11552758  | 0 | -0.073265127 |
| cov1_2_4_10  | 20.7178 | -303.964 | 0.2600496 | 0 | 0.11057241  | 0 | -0.077507444 |
| cov1_2_4_8   | 20.7278 | -303.969 | 0.2603243 | 0 | 0.11248398  | 0 | -0.075454015 |
| cov1_2_4_7   | 20.728  | -303.969 | 0.2603236 | 0 | 0.1124899   | 0 | -0.07546735  |
| cov1_2_4_6   | 20.7287 | -303.969 | 0.2603079 | 0 | 0.11334213  | 0 | -0.075629682 |
| cov1_4_9_10  | 20.7757 | -303.993 | 0.261777  | 0 | 0.080014801 | 0 | 0            |
| cov2_4_7_11  | 20.8446 | -304.027 | 0.25734   | 0 | 0           | 0 | -0.043055757 |
| cov2_4_8_11  | 20.845  | -304.027 | 0.2573466 | 0 | 0           | 0 | -0.043071553 |
| cov2_4_10_11 | 20.861  | -304.035 | 0.2566182 | 0 | 0           | 0 | -0.053742795 |
| cov1_2_9_11  | 20.888  | -304.049 | 0.2563282 | 0 | 0.10124705  | 0 | -0.040452394 |
| cov1_2_7_11  | 20.9101 | -304.06  | 0.2547906 | 0 | 0.087957582 | 0 | -0.041879464 |
| cov1_2_8_11  | 20.9108 | -304.06  | 0.254796  | 0 | 0.088024806 | 0 | -0.041893338 |
| cov3_6_9_10  | 20.9124 | -304.061 | 0.2656155 | 0 | 0           | 0 | 0            |
| cov1_8_9_10  | 20.965  | -304.087 | 0.2608391 | 0 | 0.1011647   | 0 | 0            |
| cov1_7_9_10  | 20.9655 | -304.087 | 0.2608361 | 0 | 0.101159    | 0 | 0            |

|              |         |          |           |   |             |   |              |
|--------------|---------|----------|-----------|---|-------------|---|--------------|
| cov1_6_9_10  | 20.9943 | -304.102 | 0.2607546 | 0 | 0.097846287 | 0 | 0            |
| cov2_4_9_11  | 21.0014 | -304.105 | 0.2572504 | 0 | 0           | 0 | -0.047019711 |
| cov1_4_7_11  | 21.0114 | -304.11  | 0.2576581 | 0 | 0.033775431 | 0 | 0            |
| cov1_4_8_11  | 21.0117 | -304.111 | 0.257664  | 0 | 0.033800944 | 0 | 0            |
| cov6_9_10_11 | 21.0146 | -304.112 | 0.257643  | 0 | 0           | 0 | 0            |
| cov1_4_9_11  | 21.0231 | -304.116 | 0.2587042 | 0 | 0.047318189 | 0 | 0            |
| cov1_2_10_11 | 21.0277 | -304.119 | 0.2555338 | 0 | 0.096953621 | 0 | -0.041062826 |
| cov3_4_6_8   | 21.0288 | -304.119 | 0.2672492 | 0 | 0           | 0 | 0            |
| cov3_4_6_7   | 21.0319 | -304.121 | 0.2672665 | 0 | 0           | 0 | 0            |
| cov1_2_6_11  | 21.0558 | -304.133 | 0.2548906 | 0 | 0.098954793 | 0 | -0.041602077 |
| cov1_7_9_11  | 21.069  | -304.139 | 0.2575774 | 0 | 0.062833344 | 0 | 0            |
| cov1_8_9_11  | 21.0691 | -304.139 | 0.2575828 | 0 | 0.062890923 | 0 | 0            |
| cov1_4_6_11  | 21.1061 | -304.158 | 0.2577746 | 0 | 0.046080961 | 0 | 0            |
| cov1_4_10_11 | 21.1132 | -304.161 | 0.25811   | 0 | 0.039873941 | 0 | 0            |
| cov3_6_8_10  | 21.1167 | -304.163 | 0.2661806 | 0 | 0           | 0 | 0            |
| cov3_6_7_10  | 21.1232 | -304.166 | 0.2661937 | 0 | 0           | 0 | 0            |
| cov4_6_7_11  | 21.1636 | -304.186 | 0.25796   | 0 | 0           | 0 | 0            |
| cov4_6_8_11  | 21.1654 | -304.187 | 0.2579663 | 0 | 0           | 0 | 0            |
| cov2_3_6_8   | 21.184  | -304.197 | 0.2670787 | 0 | 0           | 0 | 0.009667785  |
| cov2_3_6_7   | 21.1891 | -304.199 | 0.2670974 | 0 | 0           | 0 | 0.009935208  |
| cov3_6_8_9   | 21.2084 | -304.209 | 0.2667393 | 0 | 0           | 0 | 0            |
| cov3_6_7_8   | 21.2113 | -304.21  | 0.266881  | 0 | 0           | 0 | 0            |
| cov3_6_7_9   | 21.2149 | -304.212 | 0.2667489 | 0 | 0           | 0 | 0            |
| cov4_7_9_11  | 21.2262 | -304.218 | 0.2579421 | 0 | 0           | 0 | 0            |
| cov4_8_9_11  | 21.2268 | -304.218 | 0.2579507 | 0 | 0           | 0 | 0            |
| cov1_7_10_11 | 21.2282 | -304.219 | 0.2568212 | 0 | 0.058322704 | 0 | 0            |
| cov1_8_10_11 | 21.2287 | -304.219 | 0.2568277 | 0 | 0.058392258 | 0 | 0            |
| cov4_7_10_11 | 21.232  | -304.221 | 0.2574614 | 0 | 0           | 0 | 0            |
| cov4_8_10_11 | 21.2327 | -304.221 | 0.2574696 | 0 | 0           | 0 | 0            |
| cov1_6_9_11  | 21.2348 | -304.222 | 0.2576358 | 0 | 0.070851088 | 0 | 0            |
| cov4_7_8_11  | 21.2406 | -304.225 | 0.2576632 | 0 | 0           | 0 | 0            |
| cov4_6_9_11  | 21.2645 | -304.237 | 0.2589829 | 0 | 0           | 0 | 0            |
| cov1_6_7_11  | 21.2765 | -304.243 | 0.2560115 | 0 | 0.060525426 | 0 | 0            |
| cov1_6_8_11  | 21.2767 | -304.243 | 0.2560092 | 0 | 0.060847727 | 0 | 0            |
| cov1_7_8_11  | 21.2835 | -304.246 | 0.256137  | 0 | 0.054024655 | 0 | 0            |
| cov4_6_10_11 | 21.3063 | -304.258 | 0.2582882 | 0 | 0           | 0 | 0            |
| cov7_9_10_11 | 21.3469 | -304.278 | 0.2548572 | 0 | 0           | 0 | 0            |
| cov8_9_10_11 | 21.3506 | -304.28  | 0.2548629 | 0 | 0           | 0 | 0            |
| cov2_3_4_6   | 21.3623 | -304.286 | 0.2653295 | 0 | 0           | 0 | -0.023247903 |
| cov1_6_10_11 | 21.382  | -304.296 | 0.2568361 | 0 | 0.068657648 | 0 | 0            |
| cov1_2_8_9   | 21.4059 | -304.308 | 0.2595575 | 0 | 0.13018374  | 0 | -0.036394943 |
| cov1_2_7_9   | 21.4065 | -304.308 | 0.2595541 | 0 | 0.13017592  | 0 | -0.036392235 |
| cov3_4_6_10  | 21.4296 | -304.319 | 0.2649247 | 0 | 0           | 0 | 0            |
| cov4_6_9_10  | 21.4314 | -304.32  | 0.26365   | 0 | 0           | 0 | 0            |
| cov1_2_6_9   | 21.4346 | -304.322 | 0.2594866 | 0 | 0.12521634  | 0 | -0.036829911 |
| cov3_4_6_9   | 21.4487 | -304.329 | 0.2656071 | 0 | 0           | 0 | 0            |
| cov6_7_9_11  | 21.5009 | -304.355 | 0.2574498 | 0 | 0           | 0 | 0            |

|              |         |          |           |   |             |              |
|--------------|---------|----------|-----------|---|-------------|--------------|
| cov6_8_9_11  | 21.5068 | -304.358 | 0.2574491 | 0 | 0           | 0            |
| cov1_4_8_9   | 21.5112 | -304.36  | 0.2615754 | 0 | 0.080066092 | 0            |
| cov1_4_7_9   | 21.5118 | -304.361 | 0.2615739 | 0 | 0.08005684  | 0            |
| cov1_4_6_9   | 21.5305 | -304.37  | 0.2615292 | 0 | 0.078336648 | 0            |
| cov1_2_8_10  | 21.5609 | -304.385 | 0.2587633 | 0 | 0.12624798  | -0.036929414 |
| cov1_2_7_10  | 21.5614 | -304.385 | 0.2587607 | 0 | 0.12624055  | -0.036926883 |
| cov1_2_6_10  | 21.5883 | -304.399 | 0.2586679 | 0 | 0.12371064  | -0.03726792  |
| cov2_6_7_11  | 21.6065 | -304.408 | 0.2556138 | 0 | 0           | -0.01437606  |
| cov1_2_6_8   | 21.6115 | -304.41  | 0.2580814 | 0 | 0.12193866  | -0.037840967 |
| cov1_2_6_7   | 21.6117 | -304.411 | 0.2580819 | 0 | 0.12182178  | -0.037840172 |
| cov1_2_7_8   | 21.6117 | -304.411 | 0.258069  | 0 | 0.123129    | -0.037796201 |
| cov2_6_8_11  | 21.6133 | -304.411 | 0.2556177 | 0 | 0           | -0.014219849 |
| cov1_4_8_10  | 21.6192 | -304.414 | 0.2609859 | 0 | 0.073082772 | 0            |
| cov1_4_7_10  | 21.6195 | -304.414 | 0.2609838 | 0 | 0.073075918 | 0            |
| cov6_7_10_11 | 21.6319 | -304.421 | 0.2566306 | 0 | 0           | 0            |
| cov1_4_6_8   | 21.6322 | -304.421 | 0.2606892 | 0 | 0.072302296 | 0            |
| cov1_4_6_7   | 21.6325 | -304.421 | 0.2606889 | 0 | 0.072229469 | 0            |
| cov1_4_6_10  | 21.6329 | -304.421 | 0.2609069 | 0 | 0.074178165 | 0            |
| cov1_4_7_8   | 21.6332 | -304.421 | 0.2607237 | 0 | 0.0696774   | 0            |
| cov6_8_10_11 | 21.6377 | -304.424 | 0.2566301 | 0 | 0           | 0            |
| cov6_7_8_11  | 21.6614 | -304.435 | 0.2560572 | 0 | 0           | 0            |
| cov1_6_8_9   | 21.6848 | -304.447 | 0.2607282 | 0 | 0.094778064 | 0            |
| cov1_6_7_9   | 21.6851 | -304.447 | 0.260728  | 0 | 0.094631796 | 0            |
| cov1_7_8_9   | 21.688  | -304.449 | 0.2606413 | 0 | 0.099392967 | 0            |
| cov2_9_10_11 | 21.699  | -304.454 | 0.2557597 | 0 | 0           | 0.015724032  |
| cov2_3_6_9   | 21.7056 | -304.457 | 0.2653707 | 0 | 0           | 0.007593235  |
| cov2_3_6_10  | 21.7301 | -304.47  | 0.2646171 | 0 | 0           | 0.006658859  |
| cov2_6_9_11  | 21.7486 | -304.479 | 0.2572557 | 0 | 0           | -0.009950599 |
| cov1_6_8_10  | 21.8505 | -304.53  | 0.2599322 | 0 | 0.093006349 | 0            |
| cov2_4_6_10  | 21.8507 | -304.53  | 0.2626828 | 0 | 0           | -0.044820517 |
| cov1_6_7_10  | 21.8508 | -304.53  | 0.2599321 | 0 | 0.092870256 | 0            |
| cov1_7_8_10  | 21.8512 | -304.53  | 0.2598952 | 0 | 0.095076999 | 0            |
| cov2_6_10_11 | 21.8576 | -304.533 | 0.2564122 | 0 | 0           | -0.011004944 |
| cov2_4_6_7   | 21.8767 | -304.543 | 0.2632268 | 0 | 0           | -0.040806319 |
| cov2_4_6_8   | 21.8775 | -304.543 | 0.2632262 | 0 | 0           | -0.040816352 |
| cov2_4_6_9   | 21.8811 | -304.545 | 0.2634063 | 0 | 0           | -0.040188543 |
| cov1_6_7_8   | 21.9166 | -304.563 | 0.2591515 | 0 | 0.091452249 | 0            |
| cov2_7_9_11  | 22.0464 | -304.628 | 0.2555994 | 0 | 0           | 0.011890794  |
| cov2_8_9_11  | 22.0493 | -304.629 | 0.2556091 | 0 | 0           | 0.011956713  |
| cov3_4_9_10  | 22.0748 | -304.642 | 0.2655422 | 0 | 0           | 0            |
| cov2_7_10_11 | 22.0909 | -304.65  | 0.254919  | 0 | 0           | 0.009231484  |
| cov2_7_8_11  | 22.0909 | -304.65  | 0.2549246 | 0 | 0           | 0.009255674  |
| cov2_8_10_11 | 22.0941 | -304.652 | 0.2549293 | 0 | 0           | 0.009298828  |
| cov7_8_9_11  | 22.1    | -304.655 | 0.2547877 | 0 | 0           | 0            |
| cov7_8_10_11 | 22.1231 | -304.666 | 0.2542884 | 0 | 0           | 0            |
| cov6_7_9_10  | 22.1253 | -304.667 | 0.2624375 | 0 | 0           | 0            |
| cov6_8_9_10  | 22.1293 | -304.669 | 0.2624324 | 0 | 0           | 0            |

|                |         |          |           |   |   |   |              |
|----------------|---------|----------|-----------|---|---|---|--------------|
| cov4_6_7_9     | 22.149  | -304.679 | 0.2634304 | 0 | 0 | 0 | 0            |
| cov4_6_8_9     | 22.1502 | -304.68  | 0.2634304 | 0 | 0 | 0 | 0            |
| cov2_6_9_10    | 22.1801 | -304.695 | 0.262353  | 0 | 0 | 0 | 0.004542122  |
| cov4_6_7_8     | 22.1916 | -304.7   | 0.2627378 | 0 | 0 | 0 | 0            |
| cov4_6_7_10    | 22.1932 | -304.701 | 0.2627093 | 0 | 0 | 0 | 0            |
| cov4_6_8_10    | 22.1941 | -304.702 | 0.2627095 | 0 | 0 | 0 | 0            |
| cov3_4_7_10    | 22.3167 | -304.763 | 0.2659901 | 0 | 0 | 0 | 0            |
| cov3_4_8_10    | 22.3242 | -304.767 | 0.2659519 | 0 | 0 | 0 | 0            |
| cov2_4_9_10    | 22.4548 | -304.832 | 0.2639769 | 0 | 0 | 0 | -0.007718373 |
| cov4_8_9_10    | 22.4662 | -304.838 | 0.2639851 | 0 | 0 | 0 | 0            |
| cov4_7_9_10    | 22.4664 | -304.838 | 0.2639842 | 0 | 0 | 0 | 0            |
| cov3_4_7_9     | 22.6232 | -304.916 | 0.2662623 | 0 | 0 | 0 | 0            |
| cov3_4_8_9     | 22.6295 | -304.919 | 0.2662251 | 0 | 0 | 0 | 0            |
| cov2_3_4_10    | 22.6426 | -304.926 | 0.2647528 | 0 | 0 | 0 | 0.006239421  |
| cov2_6_7_9     | 22.7866 | -304.998 | 0.2623224 | 0 | 0 | 0 | 0.00562816   |
| cov6_7_8_9     | 22.7885 | -304.999 | 0.2622119 | 0 | 0 | 0 | 0            |
| cov2_6_8_9     | 22.7905 | -305     | 0.2623199 | 0 | 0 | 0 | 0.005701797  |
| cov2_3_4_7     | 22.796  | -305.003 | 0.2679633 | 0 | 0 | 0 | 0.03178505   |
| cov2_3_4_8     | 22.8018 | -305.006 | 0.2679232 | 0 | 0 | 0 | 0.031590545  |
| cov2_3_4_9     | 22.8421 | -305.026 | 0.2653088 | 0 | 0 | 0 | 0.011961819  |
| cov6_7_8_10    | 22.9148 | -305.062 | 0.2613891 | 0 | 0 | 0 | 0            |
| cov2_6_7_10    | 22.9156 | -305.062 | 0.2614879 | 0 | 0 | 0 | 0.004758235  |
| cov2_6_8_10    | 22.9194 | -305.064 | 0.2614853 | 0 | 0 | 0 | 0.004828129  |
| cov2_6_7_8     | 22.9464 | -305.078 | 0.2608127 | 0 | 0 | 0 | 0.00361554   |
| cov2_3_7_10    | 22.9477 | -305.079 | 0.2668834 | 0 | 0 | 0 | 0.067904388  |
| cov2_3_8_10    | 22.9593 | -305.084 | 0.2668331 | 0 | 0 | 0 | 0.067833292  |
| cov3_4_7_8     | 22.9927 | -305.101 | 0.2676743 | 0 | 0 | 0 | 0            |
| cov2_3_9_10    | 22.9948 | -305.102 | 0.2659878 | 0 | 0 | 0 | 0.06862497   |
| cov2_4_8_10    | 23.0269 | -305.118 | 0.2631198 | 0 | 0 | 0 | -0.010124318 |
| cov2_4_7_10    | 23.027  | -305.118 | 0.2631192 | 0 | 0 | 0 | -0.010134458 |
| cov4_7_8_10    | 23.0486 | -305.129 | 0.2631118 | 0 | 0 | 0 | 0            |
| cov2_3_7_9     | 23.1649 | -305.187 | 0.2672421 | 0 | 0 | 0 | 0.070439211  |
| cov2_3_8_9     | 23.1754 | -305.192 | 0.2671946 | 0 | 0 | 0 | 0.070371365  |
| cov2_4_8_9     | 23.1952 | -305.202 | 0.2637167 | 0 | 0 | 0 | -0.003661203 |
| cov2_4_7_9     | 23.1953 | -305.202 | 0.263713  | 0 | 0 | 0 | -0.003682699 |
| cov4_7_8_9     | 23.1978 | -305.204 | 0.2637179 | 0 | 0 | 0 | 0            |
| cov2_4_7_8     | 23.2878 | -305.249 | 0.2647811 | 0 | 0 | 0 | 0.005779187  |
| cov2_3_7_8     | 23.3168 | -305.263 | 0.2682189 | 0 | 0 | 0 | 0.075742092  |
| cov2_7_9_10    | 24.2023 | -305.706 | 0.2628917 | 0 | 0 | 0 | 0.06653438   |
| cov2_8_9_10    | 24.2024 | -305.706 | 0.2628976 | 0 | 0 | 0 | 0.066542393  |
| cov2_5_9_10_11 | 24.3993 | -302.29  | 0.2539305 | 0 | 0 | 0 | -0.059602988 |
| cov3_5_9_10_11 | 24.5126 | -302.346 | 0.2594077 | 0 | 0 | 0 | 0            |
| cov3_4_5_9_10  | 24.582  | -302.381 | 0.2586156 | 0 | 0 | 0 | 0            |
| cov2_7_8_10    | 24.746  | -305.978 | 0.2620096 | 0 | 0 | 0 | 0.063390961  |
| cov2_7_8_9     | 24.7586 | -305.984 | 0.2626412 | 0 | 0 | 0 | 0.066166965  |
| cov2_3_5_9_10  | 24.7821 | -302.481 | 0.2590793 | 0 | 0 | 0 | -0.039301822 |
| cov2_3_5_10_11 | 24.7954 | -302.488 | 0.2554643 | 0 | 0 | 0 | -0.052472576 |

|                |         |          |           |   |              |   |              |
|----------------|---------|----------|-----------|---|--------------|---|--------------|
| cov1_5_9_10_11 | 24.8951 | -302.538 | 0.2553546 | 0 | -0.067520518 | 0 | 0            |
| cov2_4_5_9_10  | 24.9135 | -302.547 | 0.2560844 | 0 | 0            | 0 | -0.03489682  |
| cov4_5_9_10_11 | 24.9177 | -302.549 | 0.2549189 | 0 | 0            | 0 | 0            |
| cov3_4_5_10_11 | 24.9387 | -302.559 | 0.2561559 | 0 | 0            | 0 | 0            |
| cov2_5_8_9_10  | 24.9671 | -302.574 | 0.2573325 | 0 | 0            | 0 | -0.046184783 |
| cov2_5_7_9_10  | 24.9679 | -302.574 | 0.2573285 | 0 | 0            | 0 | -0.046183043 |
| cov1_4_5_9_10  | 24.995  | -302.588 | 0.2556572 | 0 | -0.03917217  | 0 | 0            |
| cov1_2_5_9_10  | 25.0165 | -302.598 | 0.2571162 | 0 | 0.00398264   | 0 | -0.047287824 |
| cov2_5_6_9_10  | 25.0177 | -302.599 | 0.2570941 | 0 | 0            | 0 | -0.045789791 |
| cov4_5_8_9_10  | 25.0488 | -302.615 | 0.2565801 | 0 | 0            | 0 | 0            |
| cov4_5_7_9_10  | 25.0494 | -302.615 | 0.2565749 | 0 | 0            | 0 | 0            |
| cov3_5_7_9_10  | 25.0633 | -302.622 | 0.2620237 | 0 | 0            | 0 | 0            |
| cov3_5_8_9_10  | 25.0678 | -302.624 | 0.2619964 | 0 | 0            | 0 | 0            |
| cov5_6_9_10_11 | 25.0828 | -302.632 | 0.255633  | 0 | 0            | 0 | 0            |
| cov4_5_6_9_10  | 25.0894 | -302.635 | 0.2558357 | 0 | 0            | 0 | 0            |
| cov2_3_5_9_11  | 25.0963 | -302.638 | 0.2563579 | 0 | 0            | 0 | -0.046372063 |
| cov2_3_4_5_11  | 25.1162 | -302.648 | 0.2571354 | 0 | 0            | 0 | -0.021003866 |
| cov3_4_5_9_11  | 25.1342 | -302.657 | 0.2567743 | 0 | 0            | 0 | 0            |
| cov1_3_4_5_11  | 25.1703 | -302.675 | 0.2572006 | 0 | -0.015677238 | 0 | 0            |
| cov1_3_5_9_10  | 25.1779 | -302.679 | 0.260946  | 0 | -0.011667098 | 0 | 0            |
| cov3_5_6_9_10  | 25.1812 | -302.681 | 0.260954  | 0 | 0            | 0 | 0            |
| cov3_4_5_6_11  | 25.1855 | -302.683 | 0.2572329 | 0 | 0            | 0 | 0            |
| cov3_4_5_7_11  | 25.1868 | -302.684 | 0.25785   | 0 | 0            | 0 | 0            |
| cov3_4_5_8_11  | 25.1877 | -302.684 | 0.2578329 | 0 | 0            | 0 | 0            |
| cov2_5_7_10_11 | 25.1929 | -302.687 | 0.2533376 | 0 | 0            | 0 | -0.061248004 |
| cov2_5_8_10_11 | 25.193  | -302.687 | 0.2533443 | 0 | 0            | 0 | -0.061236296 |
| cov5_8_9_10_11 | 25.1946 | -302.687 | 0.2574256 | 0 | 0            | 0 | 0            |
| cov5_7_9_10_11 | 25.195  | -302.688 | 0.25742   | 0 | 0            | 0 | 0            |
| cov1_3_5_10_11 | 25.2301 | -302.705 | 0.2568441 | 0 | -0.054776402 | 0 | 0            |
| cov1_2_5_10_11 | 25.2462 | -302.713 | 0.2527634 | 0 | -0.039168894 | 0 | -0.049207344 |
| cov1_2_3_5_11  | 25.2521 | -302.716 | 0.2579397 | 0 | 0.016365369  | 0 | -0.043038392 |
| cov2_5_6_10_11 | 25.2675 | -302.724 | 0.2525368 | 0 | 0            | 0 | -0.054112548 |
| cov2_3_5_6_11  | 25.2731 | -302.727 | 0.2579884 | 0 | 0            | 0 | -0.038954171 |
| cov2_3_5_8_11  | 25.2769 | -302.729 | 0.2578553 | 0 | 0            | 0 | -0.037790493 |
| cov2_3_5_7_11  | 25.277  | -302.729 | 0.2578689 | 0 | 0            | 0 | -0.037712603 |
| cov1_4_5_10_11 | 25.312  | -302.746 | 0.2517315 | 0 | -0.080243025 | 0 | 0            |
| cov3_5_6_10_11 | 25.3198 | -302.75  | 0.2571113 | 0 | 0            | 0 | 0            |
| cov3_5_7_10_11 | 25.3378 | -302.759 | 0.2594621 | 0 | 0            | 0 | 0            |
| cov3_5_8_10_11 | 25.3418 | -302.761 | 0.2594361 | 0 | 0            | 0 | 0            |
| cov2_4_5_10_11 | 25.352  | -302.766 | 0.2530886 | 0 | 0            | 0 | -0.054973236 |
| cov2_5_8_9_11  | 25.4185 | -302.799 | 0.2543027 | 0 | 0            | 0 | -0.055201435 |
| cov2_5_7_9_11  | 25.4187 | -302.8   | 0.2542951 | 0 | 0            | 0 | -0.055213585 |
| cov3_4_5_7_10  | 25.4272 | -302.804 | 0.2585376 | 0 | 0            | 0 | 0            |
| cov3_4_5_8_10  | 25.4301 | -302.805 | 0.2585133 | 0 | 0            | 0 | 0            |
| cov2_3_4_5_10  | 25.433  | -302.807 | 0.2573366 | 0 | 0            | 0 | -0.020661029 |
| cov1_5_8_9_10  | 25.4358 | -302.808 | 0.2588439 | 0 | -0.033368889 | 0 | 0            |
| cov1_5_7_9_10  | 25.4365 | -302.808 | 0.2588399 | 0 | -0.033374412 | 0 | 0            |

|                |         |          |           |   |              |   |              |
|----------------|---------|----------|-----------|---|--------------|---|--------------|
| cov2_4_5_8_11  | 25.4381 | -302.809 | 0.254695  | 0 | 0            | 0 | -0.039640699 |
| cov2_4_5_7_11  | 25.4384 | -302.809 | 0.254687  | 0 | 0            | 0 | -0.039619638 |
| cov1_4_5_7_11  | 25.4451 | -302.813 | 0.2542868 | 0 | -0.050296501 | 0 | 0            |
| cov1_4_5_8_11  | 25.4456 | -302.813 | 0.2542971 | 0 | -0.050250713 | 0 | 0            |
| cov1_3_4_5_10  | 25.4524 | -302.816 | 0.2571391 | 0 | -0.024208369 | 0 | 0            |
| cov3_4_5_6_10  | 25.4833 | -302.832 | 0.2573809 | 0 | 0            | 0 | 0            |
| cov1_5_6_9_10  | 25.4876 | -302.834 | 0.2585249 | 0 | -0.02751542  | 0 | 0            |
| cov5_6_8_9_10  | 25.493  | -302.837 | 0.2587451 | 0 | 0            | 0 | 0            |
| cov5_6_7_9_10  | 25.4945 | -302.837 | 0.2587422 | 0 | 0            | 0 | 0            |
| cov1_2_5_8_11  | 25.496  | -302.838 | 0.2554895 | 0 | -0.01046071  | 0 | -0.045269361 |
| cov1_2_5_7_11  | 25.4965 | -302.838 | 0.2554804 | 0 | -0.01048628  | 0 | -0.045256691 |
| cov2_5_6_8_11  | 25.4966 | -302.838 | 0.2553517 | 0 | 0            | 0 | -0.046608491 |
| cov2_5_6_7_11  | 25.4979 | -302.839 | 0.2553498 | 0 | 0            | 0 | -0.046682406 |
| cov2_5_7_8_11  | 25.5062 | -302.843 | 0.2554447 | 0 | 0            | 0 | -0.048924671 |
| cov1_3_5_9_11  | 25.5226 | -302.851 | 0.257908  | 0 | -0.037330609 | 0 | 0            |
| cov1_5_7_10_11 | 25.5369 | -302.859 | 0.2543987 | 0 | -0.082934516 | 0 | 0            |
| cov1_5_8_10_11 | 25.5377 | -302.859 | 0.2544085 | 0 | -0.082841934 | 0 | 0            |
| cov3_5_7_9_11  | 25.5566 | -302.868 | 0.2597502 | 0 | 0            | 0 | 0            |
| cov3_5_8_9_11  | 25.5596 | -302.87  | 0.2597284 | 0 | 0            | 0 | 0            |
| cov3_7_9_10    | 25.5604 | -306.385 | 0.2643261 | 0 | 0            | 0 | 0            |
| cov3_5_6_9_11  | 25.5613 | -302.871 | 0.2580546 | 0 | 0            | 0 | 0            |
| cov5_7_8_9_10  | 25.5631 | -302.872 | 0.2593003 | 0 | 0            | 0 | 0            |
| cov3_8_9_10    | 25.5669 | -306.388 | 0.2642918 | 0 | 0            | 0 | 0            |
| cov1_2_5_9_11  | 25.5742 | -302.877 | 0.2539491 | 0 | -0.022934526 | 0 | -0.047046016 |
| cov2_5_6_9_11  | 25.5751 | -302.878 | 0.2537604 | 0 | 0            | 0 | -0.04966194  |
| cov2_4_5_9_11  | 25.5939 | -302.887 | 0.2539475 | 0 | 0            | 0 | -0.047315703 |
| cov4_5_6_10_11 | 25.607  | -302.894 | 0.2525539 | 0 | 0            | 0 | 0            |
| cov2_3_5_7_10  | 25.6076 | -302.894 | 0.2588653 | 0 | 0            | 0 | -0.036536767 |
| cov2_3_5_8_10  | 25.6096 | -302.895 | 0.2588404 | 0 | 0            | 0 | -0.036641686 |
| cov4_5_6_8_11  | 25.6135 | -302.897 | 0.2542972 | 0 | 0            | 0 | 0            |
| cov4_5_6_7_11  | 25.6165 | -302.898 | 0.2542991 | 0 | 0            | 0 | 0            |
| cov3_5_6_7_11  | 25.6272 | -302.904 | 0.2598376 | 0 | 0            | 0 | 0            |
| cov3_5_6_8_11  | 25.629  | -302.905 | 0.2598133 | 0 | 0            | 0 | 0            |
| cov1_3_5_7_11  | 25.6301 | -302.905 | 0.2598775 | 0 | -0.008348402 | 0 | 0            |
| cov1_3_5_8_11  | 25.6314 | -302.906 | 0.2598532 | 0 | -0.008771466 | 0 | 0            |
| cov3_5_7_8_11  | 25.6348 | -302.908 | 0.2601826 | 0 | 0            | 0 | 0            |
| cov1_2_3_5_10  | 25.6399 | -302.91  | 0.2583565 | 0 | 0.011102573  | 0 | -0.042928238 |
| cov1_3_5_6_11  | 25.6421 | -302.911 | 0.259203  | 0 | -0.011884708 | 0 | 0            |
| cov1_4_5_9_11  | 25.6477 | -302.914 | 0.2529952 | 0 | -0.062242106 | 0 | 0            |
| cov2_3_5_6_10  | 25.6497 | -302.915 | 0.2582516 | 0 | 0            | 0 | -0.040075143 |
| cov1_2_4_5_11  | 25.6895 | -302.935 | 0.2549749 | 0 | -0.011049413 | 0 | -0.032679303 |
| cov2_4_5_6_11  | 25.6919 | -302.936 | 0.2549316 | 0 | 0            | 0 | -0.035581521 |
| cov4_5_7_10_11 | 25.7042 | -302.942 | 0.2542296 | 0 | 0            | 0 | 0            |
| cov4_5_8_10_11 | 25.7045 | -302.942 | 0.2542383 | 0 | 0            | 0 | 0            |
| cov1_4_5_8_10  | 25.7085 | -302.944 | 0.2548846 | 0 | -0.049285477 | 0 | 0            |
| cov1_4_5_7_10  | 25.7087 | -302.944 | 0.2548797 | 0 | -0.049308931 | 0 | 0            |
| cov1_3_9_10_11 | 25.7195 | -302.95  | 0.260636  | 0 | 0.057659909  | 0 | 0            |

|                |         |          |           |   |              |   |              |
|----------------|---------|----------|-----------|---|--------------|---|--------------|
| cov2_4_5_8_10  | 25.7279 | -302.954 | 0.2554667 | 0 | 0            | 0 | -0.035119247 |
| cov2_4_5_7_10  | 25.7285 | -302.954 | 0.2554623 | 0 | 0            | 0 | -0.03511216  |
| cov1_5_6_10_11 | 25.7288 | -302.955 | 0.2541794 | 0 | -0.06192268  | 0 | 0            |
| cov1_2_5_6_11  | 25.7336 | -302.957 | 0.2555516 | 0 | 0.002844803  | 0 | -0.044956219 |
| cov3_4_5_7_9   | 25.7388 | -302.96  | 0.2589923 | 0 | 0            | 0 | 0            |
| cov3_4_5_8_9   | 25.7406 | -302.96  | 0.2589732 | 0 | 0            | 0 | 0            |
| cov2_3_4_5_9   | 25.7441 | -302.962 | 0.258212  | 0 | 0            | 0 | -0.01317908  |
| cov1_2_4_5_10  | 25.77   | -302.975 | 0.2549964 | 0 | -0.024730514 | 0 | -0.025563504 |
| cov1_3_4_5_9   | 25.7705 | -302.975 | 0.2583186 | 0 | -0.007327699 | 0 | 0            |
| cov4_5_7_9_11  | 25.7741 | -302.977 | 0.2548826 | 0 | 0            | 0 | 0            |
| cov4_5_8_9_11  | 25.7741 | -302.977 | 0.2548919 | 0 | 0            | 0 | 0            |
| cov4_5_7_8_11  | 25.7742 | -302.977 | 0.2549528 | 0 | 0            | 0 | 0            |
| cov3_4_5_6_9   | 25.7748 | -302.978 | 0.2584368 | 0 | 0            | 0 | 0            |
| cov2_4_5_6_10  | 25.7877 | -302.984 | 0.2550545 | 0 | 0            | 0 | -0.032408197 |
| cov1_5_7_9_11  | 25.8155 | -302.998 | 0.2554524 | 0 | -0.065909852 | 0 | 0            |
| cov1_5_8_9_11  | 25.8158 | -302.998 | 0.2554622 | 0 | -0.065825658 | 0 | 0            |
| cov1_4_5_6_11  | 25.8219 | -303.001 | 0.2548092 | 0 | -0.03474485  | 0 | 0            |
| cov5_6_8_10_11 | 25.8229 | -303.002 | 0.2547923 | 0 | 0            | 0 | 0            |
| cov5_6_7_10_11 | 25.8263 | -303.003 | 0.2547948 | 0 | 0            | 0 | 0            |
| cov2_5_6_8_10  | 25.8318 | -303.006 | 0.2563694 | 0 | 0            | 0 | -0.045021825 |
| cov2_5_6_7_10  | 25.8326 | -303.006 | 0.2563672 | 0 | 0            | 0 | -0.045053085 |
| cov4_5_6_9_11  | 25.8343 | -303.007 | 0.2536162 | 0 | 0            | 0 | 0            |
| cov1_2_5_8_10  | 25.8351 | -303.008 | 0.2564755 | 0 | -0.006865276 | 0 | -0.044660059 |
| cov1_2_5_7_10  | 25.8357 | -303.008 | 0.2564718 | 0 | -0.006873779 | 0 | -0.044655963 |
| cov2_5_7_8_10  | 25.8392 | -303.01  | 0.2564791 | 0 | 0            | 0 | -0.046816624 |
| cov1_4_5_6_10  | 25.8494 | -303.015 | 0.2547451 | 0 | -0.042214363 | 0 | 0            |
| cov4_5_6_8_10  | 25.8545 | -303.017 | 0.2550951 | 0 | 0            | 0 | 0            |
| cov4_5_6_7_10  | 25.8566 | -303.018 | 0.2550939 | 0 | 0            | 0 | 0            |
| cov1_2_5_6_10  | 25.8828 | -303.032 | 0.2561672 | 0 | -0.000523217 | 0 | -0.044787974 |
| cov3_7_8_10    | 25.8923 | -306.551 | 0.2637178 | 0 | 0            | 0 | 0            |
| cov1_3_4_5_7   | 25.895  | -303.038 | 0.2608004 | 0 | 0.025500739  | 0 | 0            |
| cov1_2_3_4_5   | 25.8968 | -303.039 | 0.2600161 | 0 | 0.027189118  | 0 | -0.015093424 |
| cov1_3_4_5_8   | 25.8974 | -303.039 | 0.2607597 | 0 | 0.025035069  | 0 | 0            |
| cov1_3_7_9_10  | 25.9076 | -303.044 | 0.2660708 | 0 | 0.10676638   | 0 | 0            |
| cov3_4_5_6_7   | 25.9148 | -303.048 | 0.2605725 | 0 | 0            | 0 | 0            |
| cov3_4_5_6_8   | 25.9155 | -303.048 | 0.2605605 | 0 | 0            | 0 | 0            |
| cov2_3_4_5_6   | 25.9177 | -303.049 | 0.2601315 | 0 | 0            | 0 | -0.007440578 |
| cov1_3_4_5_6   | 25.9198 | -303.05  | 0.2600911 | 0 | 0.009776824  | 0 | 0            |
| cov1_3_8_9_10  | 25.9272 | -303.054 | 0.266011  | 0 | 0.1066367    | 0 | 0            |
| cov1_5_6_8_11  | 25.9276 | -303.054 | 0.2566999 | 0 | -0.040196799 | 0 | 0            |
| cov1_5_6_7_11  | 25.9285 | -303.054 | 0.2567018 | 0 | -0.040562394 | 0 | 0            |
| cov3_5_6_7_10  | 25.932  | -303.056 | 0.2609141 | 0 | 0            | 0 | 0            |
| cov1_5_7_8_11  | 25.9325 | -303.056 | 0.2568163 | 0 | -0.045849089 | 0 | 0            |
| cov1_2_3_5_9   | 25.9344 | -303.057 | 0.2594517 | 0 | 0.026247373  | 0 | -0.040946418 |
| cov3_5_6_8_10  | 25.9364 | -303.058 | 0.2608899 | 0 | 0            | 0 | 0            |
| cov1_3_5_7_10  | 25.9373 | -303.059 | 0.2610868 | 0 | -0.003169888 | 0 | 0            |
| cov3_5_7_8_10  | 25.9374 | -303.059 | 0.261203  | 0 | 0            | 0 | 0            |



|                |         |          |           |   |              |   |              |
|----------------|---------|----------|-----------|---|--------------|---|--------------|
| cov1_3_5_8_10  | 25.9413 | -303.061 | 0.2610381 | 0 | -0.00372864  | 0 | 0            |
| cov1_2_3_7_11  | 25.9549 | -303.068 | 0.2608941 | 0 | 0.097433518  | 0 | -0.038425253 |
| cov3_4_5_7_8   | 25.9576 | -303.069 | 0.2600757 | 0 | 0            | 0 | 0            |
| cov2_3_4_5_7   | 25.959  | -303.07  | 0.2600817 | 0 | 0            | 0 | 0.000565856  |
| cov2_3_4_5_8   | 25.9593 | -303.07  | 0.2600622 | 0 | 0            | 0 | 0.000440945  |
| cov1_2_3_8_11  | 25.965  | -303.073 | 0.2608372 | 0 | 0.09716473   | 0 | -0.038429419 |
| cov2_3_5_7_9   | 25.9724 | -303.076 | 0.2595365 | 0 | 0            | 0 | -0.031541611 |
| cov2_3_5_8_9   | 25.9736 | -303.077 | 0.2595153 | 0 | 0            | 0 | -0.031638488 |
| cov2_3_5_6_9   | 25.975  | -303.078 | 0.2593946 | 0 | 0            | 0 | -0.035874655 |
| cov4_5_7_8_10  | 25.9846 | -303.082 | 0.2558183 | 0 | 0            | 0 | 0            |
| cov2_4_5_8_9   | 25.9852 | -303.083 | 0.2564217 | 0 | 0            | 0 | -0.026803357 |
| cov2_4_5_7_9   | 25.986  | -303.083 | 0.2564167 | 0 | 0            | 0 | -0.026797227 |
| cov1_2_3_5_7   | 26.003  | -303.092 | 0.2619305 | 0 | 0.059269051  | 0 | -0.038387327 |
| cov5_6_8_9_11  | 26.0035 | -303.092 | 0.2557578 | 0 | 0            | 0 | 0            |
| cov5_6_7_9_11  | 26.0066 | -303.093 | 0.2557603 | 0 | 0            | 0 | 0            |
| cov1_2_3_5_8   | 26.0069 | -303.094 | 0.2618838 | 0 | 0.058692281  | 0 | -0.038418545 |
| cov1_4_5_8_9   | 26.015  | -303.098 | 0.2560676 | 0 | -0.032543565 | 0 | 0            |
| cov1_4_5_7_9   | 26.0155 | -303.098 | 0.2560612 | 0 | -0.032563334 | 0 | 0            |
| cov1_3_5_6_10  | 26.0254 | -303.103 | 0.2597642 | 0 | -0.015137326 | 0 | 0            |
| cov1_5_6_9_11  | 26.027  | -303.104 | 0.2553074 | 0 | -0.047873054 | 0 | 0            |
| cov5_6_7_8_11  | 26.045  | -303.113 | 0.2565635 | 0 | 0            | 0 | 0            |
| cov1_2_3_5_6   | 26.0606 | -303.12  | 0.2609747 | 0 | 0.041969155  | 0 | -0.039376876 |
| cov1_2_4_5_9   | 26.0828 | -303.132 | 0.2561756 | 0 | -0.008225126 | 0 | -0.025085801 |
| cov2_4_5_6_9   | 26.0851 | -303.133 | 0.2561971 | 0 | 0            | 0 | -0.02744283  |
| cov4_5_6_8_9   | 26.0882 | -303.134 | 0.2562286 | 0 | 0            | 0 | 0            |
| cov4_5_6_7_9   | 26.09   | -303.135 | 0.2562271 | 0 | 0            | 0 | 0            |
| cov2_4_5_6_8   | 26.1159 | -303.148 | 0.2579466 | 0 | 0            | 0 | -0.018477726 |
| cov2_4_5_6_7   | 26.1167 | -303.148 | 0.2579436 | 0 | 0            | 0 | -0.018554282 |
| cov1_2_4_5_8   | 26.1188 | -303.15  | 0.2578958 | 0 | 0.00668078   | 0 | -0.019294156 |
| cov1_2_4_5_7   | 26.12   | -303.15  | 0.2578925 | 0 | 0.006696507  | 0 | -0.019279135 |
| cov2_4_5_7_8   | 26.1226 | -303.151 | 0.2579243 | 0 | 0            | 0 | -0.015217333 |
| cov3_6_9_10_11 | 26.1231 | -303.152 | 0.2604992 | 0 | 0            | 0 | 0            |
| cov1_2_5_8_9   | 26.1245 | -303.152 | 0.2575627 | 0 | 0.007968868  | 0 | -0.042688322 |
| cov1_2_5_7_9   | 26.1253 | -303.153 | 0.2575586 | 0 | 0.007962144  | 0 | -0.042684484 |
| cov2_5_6_8_9   | 26.1293 | -303.155 | 0.257592  | 0 | 0            | 0 | -0.040716507 |
| cov2_5_7_8_9   | 26.1299 | -303.155 | 0.2575575 | 0 | 0            | 0 | -0.040170544 |
| cov2_5_6_7_9   | 26.13   | -303.155 | 0.2575902 | 0 | 0            | 0 | -0.040750746 |
| cov4_5_7_8_9   | 26.1354 | -303.158 | 0.2566772 | 0 | 0            | 0 | 0            |
| cov5_7_8_10_11 | 26.1553 | -303.168 | 0.2567435 | 0 | 0            | 0 | 0            |
| cov1_4_5_6_8   | 26.1611 | -303.171 | 0.2577994 | 0 | -0.014865733 | 0 | 0            |
| cov1_4_5_6_7   | 26.1618 | -303.171 | 0.2577987 | 0 | -0.015144851 | 0 | 0            |
| cov1_4_5_6_9   | 26.1622 | -303.171 | 0.2559599 | 0 | -0.02846909  | 0 | 0            |
| cov1_4_5_7_8   | 26.1642 | -303.172 | 0.2577613 | 0 | -0.010225493 | 0 | 0            |
| cov2_3_5_6_7   | 26.1647 | -303.172 | 0.261802  | 0 | 0            | 0 | -0.02880556  |
| cov2_3_5_6_8   | 26.1651 | -303.173 | 0.2617896 | 0 | 0            | 0 | -0.028862922 |
| cov1_2_3_4_11  | 26.174  | -303.177 | 0.2591693 | 0 | 0.080830243  | 0 | -0.060398758 |
| cov4_5_6_7_8   | 26.179  | -303.18  | 0.2576147 | 0 | 0            | 0 | 0            |

|                |         |          |           |   |              |   |              |
|----------------|---------|----------|-----------|---|--------------|---|--------------|
| cov1_3_7_10_11 | 26.1815 | -303.181 | 0.2616312 | 0 | 0.061678009  | 0 | 0            |
| cov1_2_5_6_9   | 26.1818 | -303.181 | 0.2572946 | 0 | 0.011381701  | 0 | -0.042907221 |
| cov1_3_8_10_11 | 26.1927 | -303.186 | 0.2615736 | 0 | 0.061419252  | 0 | 0            |
| cov5_7_8_9_11  | 26.2074 | -303.194 | 0.2573117 | 0 | 0            | 0 | 0            |
| cov1_3_5_7_9   | 26.2084 | -303.194 | 0.2619806 | 0 | 0.012125581  | 0 | 0            |
| cov1_3_5_8_9   | 26.2125 | -303.196 | 0.2619322 | 0 | 0.011536307  | 0 | 0            |
| cov3_5_7_8_9   | 26.2186 | -303.199 | 0.2615436 | 0 | 0            | 0 | 0            |
| cov3_5_6_7_9   | 26.2187 | -303.199 | 0.2616503 | 0 | 0            | 0 | 0            |
| cov3_5_6_8_9   | 26.2216 | -303.201 | 0.2616301 | 0 | 0            | 0 | 0            |
| cov1_2_4_5_6   | 26.2345 | -303.207 | 0.2578991 | 0 | 0.01105195   | 0 | -0.025104625 |
| cov1_2_5_6_8   | 26.2513 | -303.216 | 0.259056  | 0 | 0.02418778   | 0 | -0.041100893 |
| cov1_2_5_6_7   | 26.2523 | -303.216 | 0.2590555 | 0 | 0.024025636  | 0 | -0.041101069 |
| cov1_2_5_7_8   | 26.2523 | -303.216 | 0.2590218 | 0 | 0.027007335  | 0 | -0.041000883 |
| cov1_5_6_8_10  | 26.2524 | -303.216 | 0.2577806 | 0 | -0.034771458 | 0 | 0            |
| cov1_5_6_7_10  | 26.2532 | -303.217 | 0.2577798 | 0 | -0.034930052 | 0 | 0            |
| cov3_4_9_10_11 | 26.2542 | -303.217 | 0.259823  | 0 | 0            | 0 | 0            |
| cov1_5_7_8_10  | 26.2591 | -303.22  | 0.2579156 | 0 | -0.040869764 | 0 | 0            |
| cov1_3_4_7_11  | 26.2604 | -303.22  | 0.2620776 | 0 | 0.070720706  | 0 | 0            |
| cov1_3_6_7_11  | 26.265  | -303.223 | 0.2621147 | 0 | 0.071098289  | 0 | 0            |
| cov1_3_7_8_11  | 26.2679 | -303.224 | 0.262216  | 0 | 0.066504099  | 0 | 0            |
| cov1_3_7_9_11  | 26.268  | -303.224 | 0.2621584 | 0 | 0.066076341  | 0 | 0            |
| cov1_3_4_8_11  | 26.2709 | -303.226 | 0.2620222 | 0 | 0.070329435  | 0 | 0            |
| cov2_3_5_7_8   | 26.2753 | -303.228 | 0.2612525 | 0 | 0            | 0 | -0.021969922 |
| cov1_3_6_8_11  | 26.276  | -303.228 | 0.2620678 | 0 | 0.070176314  | 0 | 0            |
| cov1_3_8_9_11  | 26.2782 | -303.229 | 0.2621041 | 0 | 0.065831191  | 0 | 0            |
| cov1_3_5_6_9   | 26.2891 | -303.235 | 0.2608069 | 0 | -0.002063886 | 0 | 0            |
| cov2_5_6_7_8   | 26.2903 | -303.235 | 0.2595376 | 0 | 0            | 0 | -0.035243173 |
| cov3_7_8_9     | 26.2962 | -306.753 | 0.2638234 | 0 | 0            | 0 | 0            |
| cov1_3_5_7_8   | 26.3143 | -303.247 | 0.2631929 | 0 | 0.030318069  | 0 | 0            |
| cov1_3_5_6_7   | 26.3155 | -303.248 | 0.2632096 | 0 | 0.028804411  | 0 | 0            |
| cov1_3_5_6_8   | 26.3196 | -303.25  | 0.2631678 | 0 | 0.027886021  | 0 | 0            |
| cov5_6_7_8_10  | 26.3364 | -303.258 | 0.2577656 | 0 | 0            | 0 | 0            |
| cov3_7_9_10_11 | 26.3382 | -303.259 | 0.2591757 | 0 | 0            | 0 | 0            |
| cov3_8_9_10_11 | 26.3429 | -303.262 | 0.2591482 | 0 | 0            | 0 | 0            |
| cov1_2_3_9_11  | 26.3624 | -303.271 | 0.2590936 | 0 | 0.089316355  | 0 | -0.039237357 |
| cov3_5_6_7_8   | 26.3644 | -303.272 | 0.2629252 | 0 | 0            | 0 | 0            |
| cov1_2_3_10_11 | 26.3646 | -303.272 | 0.2582915 | 0 | 0.084587723  | 0 | -0.040091039 |
| cov1_2_3_6_11  | 26.3784 | -303.279 | 0.2586084 | 0 | 0.089970216  | 0 | -0.039519305 |
| cov1_2_3_9_10  | 26.4411 | -303.311 | 0.2629768 | 0 | 0.13476322   | 0 | -0.037606307 |
| cov1_5_6_8_9   | 26.5108 | -303.346 | 0.2588109 | 0 | -0.022036736 | 0 | 0            |
| cov1_5_6_7_9   | 26.5117 | -303.346 | 0.25881   | 0 | -0.022204094 | 0 | 0            |
| cov1_5_7_8_9   | 26.5123 | -303.346 | 0.2588801 | 0 | -0.025012639 | 0 | 0            |
| cov5_6_7_8_9   | 26.5443 | -303.362 | 0.2587937 | 0 | 0            | 0 | 0            |
| cov2_3_9_10_11 | 26.5926 | -303.386 | 0.2587345 | 0 | 0            | 0 | 0.008965516  |
| cov1_2_3_7_10  | 26.6088 | -303.395 | 0.2638223 | 0 | 0.12994421   | 0 | -0.035150488 |
| cov1_5_6_7_8   | 26.6116 | -303.396 | 0.2600976 | 0 | -0.007661036 | 0 | 0            |
| cov1_2_3_4_7   | 26.6225 | -303.401 | 0.2644801 | 0 | 0.12878519   | 0 | -0.046976793 |

|                |         |          |           |   |             |   |              |
|----------------|---------|----------|-----------|---|-------------|---|--------------|
| cov1_2_3_8_10  | 26.627  | -303.404 | 0.2637664 | 0 | 0.12980302  | 0 | -0.035124669 |
| cov1_2_3_4_8   | 26.6373 | -303.409 | 0.2644254 | 0 | 0.12856714  | 0 | -0.04713599  |
| cov3_6_7_10_11 | 26.6761 | -303.428 | 0.2611059 | 0 | 0           | 0 | 0            |
| cov3_6_8_10_11 | 26.6764 | -303.428 | 0.261096  | 0 | 0           | 0 | 0            |
| cov1_3_6_9_11  | 26.6875 | -303.434 | 0.2603451 | 0 | 0.061067602 | 0 | 0            |
| cov1_3_4_9_11  | 26.6885 | -303.434 | 0.2604759 | 0 | 0.056692799 | 0 | 0            |
| cov1_2_3_6_7   | 26.6909 | -303.436 | 0.264444  | 0 | 0.13027651  | 0 | -0.034359386 |
| cov1_2_3_7_8   | 26.6911 | -303.436 | 0.264411  | 0 | 0.13344169  | 0 | -0.03425287  |
| cov1_2_3_7_9   | 26.6921 | -303.436 | 0.264362  | 0 | 0.13315573  | 0 | -0.03428753  |
| cov1_3_6_10_11 | 26.6996 | -303.44  | 0.2595434 | 0 | 0.058465926 | 0 | 0            |
| cov1_3_4_10_11 | 26.6997 | -303.44  | 0.259815  | 0 | 0.049131056 | 0 | 0            |
| cov1_3_4_6_11  | 26.7065 | -303.443 | 0.2599748 | 0 | 0.0572122   | 0 | 0            |
| cov1_2_3_6_8   | 26.7066 | -303.443 | 0.2643973 | 0 | 0.12928111  | 0 | -0.034375201 |
| cov1_2_3_8_9   | 26.7089 | -303.445 | 0.2643086 | 0 | 0.13302364  | 0 | -0.034266844 |
| cov1_3_4_9_10  | 26.7341 | -303.457 | 0.2642863 | 0 | 0.098683131 | 0 | 0            |
| cov1_3_6_9_10  | 26.7382 | -303.459 | 0.2642591 | 0 | 0.098333593 | 0 | 0            |
| cov3_4_6_7_11  | 26.7505 | -303.465 | 0.2622175 | 0 | 0           | 0 | 0            |
| cov3_4_6_8_11  | 26.751  | -303.466 | 0.2622024 | 0 | 0           | 0 | 0            |
| cov2_3_4_6_11  | 26.7713 | -303.476 | 0.2602269 | 0 | 0           | 0 | -0.038042265 |
| cov2_3_6_8_11  | 26.7724 | -303.476 | 0.2615777 | 0 | 0           | 0 | -0.009038072 |
| cov2_3_6_7_11  | 26.7737 | -303.477 | 0.2615891 | 0 | 0           | 0 | -0.008858738 |
| cov3_6_8_9_11  | 26.789  | -303.485 | 0.2617016 | 0 | 0           | 0 | 0            |
| cov3_6_7_9_11  | 26.7893 | -303.485 | 0.2617086 | 0 | 0           | 0 | 0            |
| cov3_6_7_8_11  | 26.7939 | -303.487 | 0.2619076 | 0 | 0           | 0 | 0            |
| cov3_4_7_10_11 | 26.8368 | -303.509 | 0.2602283 | 0 | 0           | 0 | 0            |
| cov3_4_8_10_11 | 26.8419 | -303.511 | 0.2601965 | 0 | 0           | 0 | 0            |
| cov1_2_4_9_10  | 26.8453 | -303.513 | 0.2608567 | 0 | 0.11905019  | 0 | -0.079356717 |
| cov1_3_4_7_10  | 26.8703 | -303.525 | 0.2649407 | 0 | 0.10207908  | 0 | 0            |
| cov1_3_7_8_10  | 26.8706 | -303.525 | 0.2649873 | 0 | 0.10032263  | 0 | 0            |
| cov1_3_6_7_10  | 26.8711 | -303.526 | 0.2649564 | 0 | 0.10182738  | 0 | 0            |
| cov1_3_4_8_10  | 26.8883 | -303.534 | 0.2648866 | 0 | 0.10181456  | 0 | 0            |
| cov1_3_6_8_10  | 26.8893 | -303.535 | 0.2649153 | 0 | 0.10073179  | 0 | 0            |
| cov2_3_4_10_11 | 26.9215 | -303.551 | 0.2582241 | 0 | 0           | 0 | -0.033667051 |
| cov1_3_4_7_8   | 26.936  | -303.558 | 0.2653728 | 0 | 0.10762195  | 0 | 0            |
| cov1_3_4_6_7   | 26.9367 | -303.558 | 0.2653903 | 0 | 0.10584574  | 0 | 0            |
| cov1_3_4_7_9   | 26.9372 | -303.559 | 0.2653824 | 0 | 0.10781177  | 0 | 0            |
| cov1_3_6_7_8   | 26.9408 | -303.561 | 0.2654877 | 0 | 0.10302659  | 0 | 0            |
| cov1_3_7_8_9   | 26.941  | -303.561 | 0.2654689 | 0 | 0.10420342  | 0 | 0            |
| cov1_3_6_7_9   | 26.9419 | -303.561 | 0.2654877 | 0 | 0.1027216   | 0 | 0            |
| cov1_3_4_6_8   | 26.953  | -303.567 | 0.2653466 | 0 | 0.10470539  | 0 | 0            |
| cov1_3_4_8_9   | 26.954  | -303.567 | 0.2653309 | 0 | 0.10755126  | 0 | 0            |
| cov1_3_6_8_9   | 26.9578 | -303.569 | 0.2654505 | 0 | 0.10172289  | 0 | 0            |
| cov3_4_6_10_11 | 26.9698 | -303.575 | 0.2599449 | 0 | 0           | 0 | 0            |
| cov1_2_4_8_11  | 27.012  | -303.596 | 0.256964  | 0 | 0.076022806 | 0 | -0.080565913 |
| cov3_4_6_9_11  | 27.012  | -303.596 | 0.2606905 | 0 | 0           | 0 | 0            |
| cov1_2_4_7_11  | 27.0125 | -303.596 | 0.2569605 | 0 | 0.076004217 | 0 | -0.080543781 |
| cov2_3_6_10_11 | 27.0171 | -303.599 | 0.2590486 | 0 | 0           | 0 | -0.013382062 |

|                |         |          |           |   |             |   |              |
|----------------|---------|----------|-----------|---|-------------|---|--------------|
| cov7_8_9_10    | 27.0183 | -307.114 | 0.2603914 | 0 | 0           | 0 | 0            |
| cov3_4_7_9_11  | 27.0454 | -303.613 | 0.2605227 | 0 | 0           | 0 | 0            |
| cov2_3_6_9_11  | 27.0474 | -303.614 | 0.2599173 | 0 | 0           | 0 | -0.011997879 |
| cov3_4_8_9_11  | 27.0495 | -303.615 | 0.2604938 | 0 | 0           | 0 | 0            |
| cov1_2_4_10_11 | 27.0575 | -303.619 | 0.256734  | 0 | 0.076236922 | 0 | -0.084780936 |
| cov1_2_4_9_11  | 27.0758 | -303.628 | 0.2574578 | 0 | 0.081977386 | 0 | -0.080183563 |
| cov1_2_4_6_11  | 27.0759 | -303.628 | 0.2570474 | 0 | 0.086785417 | 0 | -0.081641851 |
| cov1_2_9_10_11 | 27.0819 | -303.631 | 0.2562512 | 0 | 0.10428446  | 0 | -0.043796664 |
| cov2_3_4_7_11  | 27.0997 | -303.64  | 0.2606322 | 0 | 0           | 0 | -0.013463142 |
| cov2_3_4_8_11  | 27.1021 | -303.641 | 0.2606053 | 0 | 0           | 0 | -0.013607521 |
| cov2_4_9_10_11 | 27.1033 | -303.642 | 0.2572101 | 0 | 0           | 0 | -0.052931899 |
| cov2_3_4_9_11  | 27.1099 | -303.645 | 0.258895  | 0 | 0           | 0 | -0.027114451 |
| cov2_3_7_10_11 | 27.1265 | -303.653 | 0.2594444 | 0 | 0           | 0 | 0.011901373  |
| cov3_4_7_8_11  | 27.1305 | -303.655 | 0.2609969 | 0 | 0           | 0 | 0            |
| cov2_3_8_10_11 | 27.1316 | -303.656 | 0.2594069 | 0 | 0           | 0 | 0.011802955  |
| cov1_2_3_4_10  | 27.1359 | -303.658 | 0.2621032 | 0 | 0.11649547  | 0 | -0.060156304 |
| cov1_2_3_4_9   | 27.1541 | -303.667 | 0.2627839 | 0 | 0.12135556  | 0 | -0.056146566 |
| cov1_2_3_4_6   | 27.1617 | -303.671 | 0.2625576 | 0 | 0.11708643  | 0 | -0.057569561 |
| cov3_7_8_10_11 | 27.1799 | -303.68  | 0.2585421 | 0 | 0           | 0 | 0            |
| cov1_4_9_10_11 | 27.2473 | -303.714 | 0.2588347 | 0 | 0.04626758  | 0 | 0            |
| cov3_6_8_9_10  | 27.2894 | -303.735 | 0.2673444 | 0 | 0           | 0 | 0            |
| cov3_6_7_9_10  | 27.2963 | -303.738 | 0.267356  | 0 | 0           | 0 | 0            |
| cov2_3_7_9_11  | 27.324  | -303.752 | 0.2599131 | 0 | 0           | 0 | 0.014702892  |
| cov2_3_8_9_11  | 27.3284 | -303.754 | 0.2598793 | 0 | 0           | 0 | 0.014612958  |
| cov1_7_9_10_11 | 27.3285 | -303.754 | 0.257653  | 0 | 0.063314114 | 0 | 0            |
| cov1_8_9_10_11 | 27.3288 | -303.755 | 0.2576627 | 0 | 0.063374621 | 0 | 0            |
| cov1_2_3_6_9   | 27.3493 | -303.765 | 0.2628117 | 0 | 0.12374666  | 0 | -0.0346573   |
| cov2_3_7_8_11  | 27.3924 | -303.786 | 0.2605014 | 0 | 0           | 0 | 0.017588485  |
| cov1_2_3_6_10  | 27.4003 | -303.79  | 0.2620508 | 0 | 0.12246328  | 0 | -0.035208206 |
| cov3_7_8_9_11  | 27.4055 | -303.793 | 0.2588036 | 0 | 0           | 0 | 0            |
| cov4_7_9_10_11 | 27.4453 | -303.813 | 0.2580905 | 0 | 0           | 0 | 0            |
| cov4_8_9_10_11 | 27.446  | -303.813 | 0.2580989 | 0 | 0           | 0 | 0            |
| cov4_6_9_10_11 | 27.4849 | -303.833 | 0.2590828 | 0 | 0           | 0 | 0            |
| cov1_6_9_10_11 | 27.4872 | -303.834 | 0.2576912 | 0 | 0.071845668 | 0 | 0            |
| cov2_4_6_7_11  | 27.5589 | -303.87  | 0.2578665 | 0 | 0           | 0 | -0.058955146 |
| cov2_4_6_8_11  | 27.5618 | -303.871 | 0.2578742 | 0 | 0           | 0 | -0.05890839  |
| cov1_3_4_6_9   | 27.5993 | -303.89  | 0.263952  | 0 | 0.092929967 | 0 | 0            |
| cov2_4_6_10_11 | 27.6331 | -303.907 | 0.2574627 | 0 | 0           | 0 | -0.064501727 |
| cov3_4_6_9_10  | 27.6476 | -303.914 | 0.2660274 | 0 | 0           | 0 | 0            |
| cov1_3_4_6_10  | 27.6482 | -303.914 | 0.2633112 | 0 | 0.08909341  | 0 | 0            |
| cov1_2_8_9_10  | 27.6633 | -303.922 | 0.2596371 | 0 | 0.13460228  | 0 | -0.039444045 |
| cov1_2_7_9_10  | 27.6639 | -303.922 | 0.2596341 | 0 | 0.13459593  | 0 | -0.039442044 |
| cov1_2_6_9_10  | 27.686  | -303.933 | 0.2595736 | 0 | 0.12983334  | 0 | -0.039857804 |
| cov2_4_6_9_11  | 27.6972 | -303.939 | 0.2582724 | 0 | 0           | 0 | -0.059246477 |
| cov1_2_4_8_9   | 27.7351 | -303.958 | 0.2607386 | 0 | 0.11551696  | 0 | -0.072874013 |
| cov1_2_4_7_9   | 27.7353 | -303.958 | 0.2607366 | 0 | 0.11551525  | 0 | -0.072893144 |
| cov1_2_4_6_9   | 27.7371 | -303.959 | 0.2607298 | 0 | 0.11462452  | 0 | -0.07326159  |

|                |         |          |           |   |             |   |              |
|----------------|---------|----------|-----------|---|-------------|---|--------------|
| cov2_4_7_10_11 | 27.7441 | -303.962 | 0.2563504 | 0 | 0           | 0 | -0.053188278 |
| cov2_4_8_10_11 | 27.7448 | -303.963 | 0.2563582 | 0 | 0           | 0 | -0.05319215  |
| cov1_2_4_6_10  | 27.7463 | -303.963 | 0.2600147 | 0 | 0.11253768  | 0 | -0.077517983 |
| cov1_2_4_7_10  | 27.7466 | -303.963 | 0.2600575 | 0 | 0.11056619  | 0 | -0.077365755 |
| cov1_2_4_8_10  | 27.7466 | -303.963 | 0.2600588 | 0 | 0.11056622  | 0 | -0.077346883 |
| cov1_2_7_9_11  | 27.7499 | -303.965 | 0.2562325 | 0 | 0.095109624 | 0 | -0.040492714 |
| cov1_2_8_9_11  | 27.7499 | -303.965 | 0.2562389 | 0 | 0.095178163 | 0 | -0.040496873 |
| cov1_2_4_7_8   | 27.7561 | -303.968 | 0.2603266 | 0 | 0.11249434  | 0 | -0.07549576  |
| cov1_2_4_6_8   | 27.7568 | -303.969 | 0.2603152 | 0 | 0.11319333  | 0 | -0.075436016 |
| cov1_2_4_6_7   | 27.757  | -303.969 | 0.2603146 | 0 | 0.1131846   | 0 | -0.075449935 |
| cov6_7_9_10_11 | 27.7755 | -303.978 | 0.2575125 | 0 | 0           | 0 | 0            |
| cov6_8_9_10_11 | 27.7815 | -303.981 | 0.2575112 | 0 | 0           | 0 | 0            |
| cov1_4_8_9_10  | 27.7907 | -303.985 | 0.2618379 | 0 | 0.080469243 | 0 | 0            |
| cov1_4_7_9_10  | 27.7911 | -303.986 | 0.2618355 | 0 | 0.080460691 | 0 | 0            |
| cov1_4_6_9_10  | 27.8047 | -303.992 | 0.2617894 | 0 | 0.0793532   | 0 | 0            |
| cov2_4_7_9_11  | 27.8584 | -304.019 | 0.2569821 | 0 | 0           | 0 | -0.046453443 |
| cov2_4_8_9_11  | 27.8589 | -304.02  | 0.2569904 | 0 | 0           | 0 | -0.046457237 |
| cov2_4_7_8_11  | 27.8735 | -304.027 | 0.2573419 | 0 | 0           | 0 | -0.043063176 |
| cov1_2_7_10_11 | 27.8993 | -304.04  | 0.2554197 | 0 | 0.090971736 | 0 | -0.041082712 |
| cov1_2_8_10_11 | 27.8997 | -304.04  | 0.255427  | 0 | 0.091044439 | 0 | -0.041089072 |
| cov1_2_6_9_11  | 27.917  | -304.049 | 0.2563169 | 0 | 0.10172477  | 0 | -0.040442798 |
| cov1_4_8_9_11  | 27.9269 | -304.054 | 0.2584949 | 0 | 0.044053128 | 0 | 0            |
| cov1_4_7_9_11  | 27.9271 | -304.054 | 0.258488  | 0 | 0.044013033 | 0 | 0            |
| cov3_4_6_8_10  | 27.9293 | -304.055 | 0.266479  | 0 | 0           | 0 | 0            |
| cov2_3_6_9_10  | 27.9302 | -304.055 | 0.2657515 | 0 | 0           | 0 | 0.006216847  |
| cov3_4_6_7_10  | 27.9315 | -304.056 | 0.2664997 | 0 | 0           | 0 | 0            |
| cov1_2_6_7_11  | 27.9354 | -304.058 | 0.2547089 | 0 | 0.092565954 | 0 | -0.041721859 |
| cov1_2_6_8_11  | 27.9357 | -304.058 | 0.2547085 | 0 | 0.092897545 | 0 | -0.041721575 |
| cov1_2_7_8_11  | 27.9391 | -304.06  | 0.2547913 | 0 | 0.087963012 | 0 | -0.041881324 |
| cov1_6_8_9_10  | 27.9913 | -304.086 | 0.2609183 | 0 | 0.096971752 | 0 | 0            |
| cov1_6_7_9_10  | 27.9917 | -304.086 | 0.2609181 | 0 | 0.096838573 | 0 | 0            |
| cov1_7_8_9_10  | 27.994  | -304.087 | 0.26084   | 0 | 0.10117103  | 0 | 0            |
| cov2_6_9_10_11 | 28.0033 | -304.092 | 0.2572245 | 0 | 0           | 0 | -0.012125101 |
| cov1_4_6_8_11  | 28.0286 | -304.104 | 0.2574955 | 0 | 0.042149368 | 0 | 0            |
| cov1_4_6_7_11  | 28.029  | -304.105 | 0.2574951 | 0 | 0.041899283 | 0 | 0            |
| cov1_4_7_10_11 | 28.0305 | -304.105 | 0.257885  | 0 | 0.036745586 | 0 | 0            |
| cov1_4_8_10_11 | 28.0307 | -304.105 | 0.2578944 | 0 | 0.036786433 | 0 | 0            |
| cov2_3_4_6_8   | 28.032  | -304.106 | 0.2671288 | 0 | 0           | 0 | -0.012653764 |
| cov2_3_4_6_7   | 28.0357 | -304.108 | 0.2671438 | 0 | 0           | 0 | -0.012504149 |
| cov1_4_7_8_11  | 28.0404 | -304.11  | 0.25766   | 0 | 0.03376956  | 0 | 0            |
| cov3_4_6_8_9   | 28.047  | -304.114 | 0.2669913 | 0 | 0           | 0 | 0            |
| cov1_4_6_9_11  | 28.0482 | -304.114 | 0.25858   | 0 | 0.05183711  | 0 | 0            |
| cov3_4_6_7_9   | 28.0498 | -304.115 | 0.2670089 | 0 | 0           | 0 | 0            |
| cov1_2_6_10_11 | 28.0552 | -304.118 | 0.2554614 | 0 | 0.09990682  | 0 | -0.040980526 |
| cov3_4_6_7_8   | 28.0576 | -304.119 | 0.267258  | 0 | 0           | 0 | 0            |
| cov1_6_7_9_11  | 28.0977 | -304.139 | 0.2575377 | 0 | 0.06421322  | 0 | 0            |
| cov1_6_8_9_11  | 28.0977 | -304.139 | 0.2575379 | 0 | 0.064560523 | 0 | 0            |

|                |         |          |           |   |             |   |              |
|----------------|---------|----------|-----------|---|-------------|---|--------------|
| cov1_7_8_9_11  | 28.0978 | -304.139 | 0.2575785 | 0 | 0.062841564 | 0 | 0            |
| cov2_4_6_9_10  | 28.103  | -304.142 | 0.2636549 | 0 | 0           | 0 | -0.044848207 |
| cov2_3_6_8_10  | 28.1238 | -304.152 | 0.2663889 | 0 | 0           | 0 | 0.008690826  |
| cov2_3_6_7_10  | 28.1288 | -304.155 | 0.2664167 | 0 | 0           | 0 | 0.00899184   |
| cov4_6_7_9_11  | 28.1313 | -304.156 | 0.2586989 | 0 | 0           | 0 | 0            |
| cov1_4_6_10_11 | 28.132  | -304.156 | 0.2579164 | 0 | 0.047142801 | 0 | 0            |
| cov4_6_8_9_11  | 28.1335 | -304.157 | 0.2587027 | 0 | 0           | 0 | 0            |
| cov3_6_7_8_10  | 28.1457 | -304.163 | 0.2661856 | 0 | 0           | 0 | 0            |
| cov4_6_7_10_11 | 28.1925 | -304.186 | 0.2579993 | 0 | 0           | 0 | 0            |
| cov4_6_7_8_11  | 28.1925 | -304.186 | 0.2579593 | 0 | 0           | 0 | 0            |
| cov4_6_8_10_11 | 28.1943 | -304.187 | 0.2580036 | 0 | 0           | 0 | 0            |
| cov2_3_6_8_9   | 28.211  | -304.196 | 0.2669592 | 0 | 0           | 0 | 0.009528753  |
| cov2_3_6_7_8   | 28.213  | -304.197 | 0.2670847 | 0 | 0           | 0 | 0.009713598  |
| cov2_3_6_7_9   | 28.216  | -304.198 | 0.2669784 | 0 | 0           | 0 | 0.009801336  |
| cov3_6_7_8_9   | 28.2375 | -304.209 | 0.2667411 | 0 | 0           | 0 | 0            |
| cov1_6_7_10_11 | 28.2547 | -304.217 | 0.2567192 | 0 | 0.062220265 | 0 | 0            |
| cov1_6_8_10_11 | 28.2548 | -304.218 | 0.2567195 | 0 | 0.062560001 | 0 | 0            |
| cov4_7_8_9_11  | 28.2552 | -304.218 | 0.2579442 | 0 | 0           | 0 | 0            |
| cov1_7_8_10_11 | 28.2572 | -304.219 | 0.2568223 | 0 | 0.058333432 | 0 | 0            |
| cov4_7_8_10_11 | 28.261  | -304.221 | 0.2574626 | 0 | 0           | 0 | 0            |
| cov1_6_7_8_11  | 28.3054 | -304.243 | 0.2560293 | 0 | 0.060667064 | 0 | 0            |
| cov2_7_9_10_11 | 28.3352 | -304.258 | 0.2555722 | 0 | 0           | 0 | 0.010389094  |
| cov2_3_4_6_10  | 28.3364 | -304.258 | 0.2646218 | 0 | 0           | 0 | -0.027490302 |
| cov2_8_9_10_11 | 28.3383 | -304.259 | 0.2555824 | 0 | 0           | 0 | 0.01045645   |
| cov7_8_9_10_11 | 28.376  | -304.278 | 0.2548567 | 0 | 0           | 0 | 0            |
| cov2_3_4_6_9   | 28.3913 | -304.286 | 0.2653557 | 0 | 0           | 0 | -0.023107947 |
| cov1_2_6_8_9   | 28.4289 | -304.305 | 0.2596649 | 0 | 0.12413052  | 0 | -0.036599185 |
| cov1_2_6_7_9   | 28.4293 | -304.305 | 0.2596645 | 0 | 0.12399247  | 0 | -0.036599846 |
| cov1_2_7_8_9   | 28.4348 | -304.308 | 0.2595584 | 0 | 0.13019612  | 0 | -0.036399553 |
| cov4_6_7_9_10  | 28.4457 | -304.313 | 0.2637009 | 0 | 0           | 0 | 0            |
| cov4_6_8_9_10  | 28.4467 | -304.313 | 0.2637045 | 0 | 0           | 0 | 0            |
| cov2_6_7_9_11  | 28.4866 | -304.333 | 0.257025  | 0 | 0           | 0 | -0.012605503 |
| cov2_6_8_9_11  | 28.4936 | -304.337 | 0.2570293 | 0 | 0           | 0 | -0.012439847 |
| cov6_7_8_9_11  | 28.5282 | -304.354 | 0.2574523 | 0 | 0           | 0 | 0            |
| cov1_4_6_8_9   | 28.5398 | -304.36  | 0.2616086 | 0 | 0.078375804 | 0 | 0            |
| cov1_4_7_8_9   | 28.5401 | -304.36  | 0.261578  | 0 | 0.080065983 | 0 | 0            |
| cov1_4_6_7_9   | 28.5403 | -304.36  | 0.2616078 | 0 | 0.07827583  | 0 | 0            |
| cov1_2_6_8_10  | 28.5879 | -304.384 | 0.2588227 | 0 | 0.12269528  | 0 | -0.037044927 |
| cov1_2_6_7_10  | 28.5882 | -304.384 | 0.2588225 | 0 | 0.12256782  | 0 | -0.037045528 |
| cov1_2_7_8_10  | 28.5899 | -304.385 | 0.2587639 | 0 | 0.12625546  | 0 | -0.036932301 |
| cov2_6_7_10_11 | 28.6107 | -304.395 | 0.2561591 | 0 | 0           | 0 | -0.013582486 |
| cov2_6_8_10_11 | 28.6176 | -304.399 | 0.2561641 | 0 | 0           | 0 | -0.013420132 |
| cov2_6_7_8_11  | 28.6326 | -304.406 | 0.2556108 | 0 | 0           | 0 | -0.014525777 |
| cov1_2_6_7_8   | 28.6405 | -304.41  | 0.2580814 | 0 | 0.12195519  | 0 | -0.037840373 |
| cov1_4_6_8_10  | 28.6481 | -304.414 | 0.2609655 | 0 | 0.074207066 | 0 | 0            |
| cov1_4_7_8_10  | 28.6481 | -304.414 | 0.2609875 | 0 | 0.073082378 | 0 | 0            |
| cov1_4_6_7_10  | 28.6484 | -304.414 | 0.2609651 | 0 | 0.074122779 | 0 | 0            |

|                  |         |          |           |   |              |              |
|------------------|---------|----------|-----------|---|--------------|--------------|
| cov6_7_8_10_11   | 28.6591 | -304.42  | 0.2566326 | 0 | 0            | 0            |
| cov1_4_6_7_8     | 28.6611 | -304.421 | 0.2606889 | 0 | 0.072422547  | 0            |
| cov1_6_7_8_9     | 28.7138 | -304.447 | 0.260728  | 0 | 0.09481162   | 0            |
| cov3_4_7_9_10    | 28.7674 | -304.474 | 0.2668579 | 0 | 0            | 0            |
| cov3_4_8_9_10    | 28.7754 | -304.478 | 0.2668188 | 0 | 0            | 0            |
| cov2_4_6_7_10    | 28.8758 | -304.528 | 0.2627004 | 0 | 0            | -0.044364765 |
| cov2_4_6_8_10    | 28.8764 | -304.528 | 0.2627007 | 0 | 0            | -0.044393463 |
| cov1_6_7_8_10    | 28.8796 | -304.53  | 0.2599321 | 0 | 0.093028141  | 0            |
| cov2_4_6_7_9     | 28.9016 | -304.541 | 0.2634377 | 0 | 0            | -0.039534472 |
| cov2_4_6_7_8     | 28.9025 | -304.541 | 0.2632167 | 0 | 0            | -0.040918251 |
| cov2_4_6_8_9     | 28.9026 | -304.541 | 0.263437  | 0 | 0            | -0.039559442 |
| cov2_7_8_9_11    | 29.0755 | -304.628 | 0.2555987 | 0 | 0            | 0.011891363  |
| cov2_3_4_9_10    | 29.0884 | -304.634 | 0.2656762 | 0 | 0            | 0.009113529  |
| cov2_7_8_10_11   | 29.1199 | -304.65  | 0.2549182 | 0 | 0            | 0.009229307  |
| cov6_7_8_9_10    | 29.1465 | -304.663 | 0.26243   | 0 | 0            | 0            |
| cov2_6_7_9_10    | 29.149  | -304.665 | 0.2625193 | 0 | 0            | 0.004300991  |
| cov2_6_8_9_10    | 29.1528 | -304.667 | 0.2625158 | 0 | 0            | 0.004371006  |
| cov4_6_7_8_9     | 29.1762 | -304.678 | 0.2634224 | 0 | 0            | 0            |
| cov4_6_7_8_10    | 29.2205 | -304.7   | 0.2627016 | 0 | 0            | 0            |
| cov2_3_4_7_10    | 29.3013 | -304.741 | 0.2662943 | 0 | 0            | 0.015755156  |
| cov2_3_4_8_10    | 29.3098 | -304.745 | 0.2662495 | 0 | 0            | 0.015583672  |
| cov3_4_7_8_10    | 29.3454 | -304.763 | 0.2659937 | 0 | 0            | 0            |
| cov2_3_7_9_10    | 29.3865 | -304.783 | 0.2678721 | 0 | 0            | 0.071244465  |
| cov2_3_8_9_10    | 29.3989 | -304.79  | 0.26782   | 0 | 0            | 0.071168715  |
| cov2_4_8_9_10    | 29.4833 | -304.832 | 0.2639825 | 0 | 0            | -0.007517182 |
| cov2_4_7_9_10    | 29.4834 | -304.832 | 0.2639819 | 0 | 0            | -0.007529606 |
| cov4_7_8_9_10    | 29.4951 | -304.838 | 0.2639875 | 0 | 0            | 0            |
| cov2_3_4_7_9     | 29.5765 | -304.878 | 0.2666701 | 0 | 0            | 0.020600306  |
| cov2_3_4_8_9     | 29.584  | -304.882 | 0.2666292 | 0 | 0            | 0.020432524  |
| cov3_4_7_8_9     | 29.6517 | -304.916 | 0.2662641 | 0 | 0            | 0            |
| cov2_6_7_8_9     | 29.8092 | -304.995 | 0.2623104 | 0 | 0            | 0.005380767  |
| cov2_3_4_7_8     | 29.824  | -305.002 | 0.2679682 | 0 | 0            | 0.031767892  |
| cov2_6_7_8_10    | 29.938  | -305.059 | 0.2614753 | 0 | 0            | 0.004506563  |
| cov2_3_7_8_10    | 29.9766 | -305.078 | 0.266886  | 0 | 0            | 0.067908801  |
| cov2_4_7_8_10    | 30.0558 | -305.118 | 0.2631208 | 0 | 0            | -0.010137213 |
| cov2_3_7_8_9     | 30.1937 | -305.187 | 0.2672456 | 0 | 0            | 0.07044525   |
| cov2_4_7_8_9     | 30.224  | -305.202 | 0.2637193 | 0 | 0            | -0.003676157 |
| cov2_3_5_9_10_11 | 30.8375 | -301.994 | 0.256142  | 0 | 0            | -0.052750602 |
| cov3_4_5_9_10_11 | 30.9369 | -302.044 | 0.2568019 | 0 | 0            | 0            |
| cov2_7_8_9_10    | 31.2314 | -305.706 | 0.2629003 | 0 | 0            | 0.066538571  |
| cov2_5_8_9_10_11 | 31.2454 | -302.198 | 0.2539644 | 0 | 0            | -0.061722818 |
| cov2_5_7_9_10_11 | 31.2455 | -302.198 | 0.2539574 | 0 | 0            | -0.061733435 |
| cov1_3_5_9_10_11 | 31.3478 | -302.249 | 0.2577922 | 0 | -0.047251495 | 0            |
| cov1_2_5_9_10_11 | 31.357  | -302.254 | 0.2534617 | 0 | -0.030669891 | -0.051775712 |
| cov2_5_6_9_10_11 | 31.367  | -302.259 | 0.2532642 | 0 | 0            | -0.055524044 |
| cov3_5_7_9_10_11 | 31.3911 | -302.271 | 0.2601639 | 0 | 0            | 0            |
| cov3_5_8_9_10_11 | 31.3954 | -302.273 | 0.260142  | 0 | 0            | 0            |

|                  |         |          |           |   |              |   |              |
|------------------|---------|----------|-----------|---|--------------|---|--------------|
| cov2_4_5_9_10_11 | 31.4094 | -302.28  | 0.2536064 | 0 | 0            | 0 | -0.054118564 |
| cov3_5_6_9_10_11 | 31.4169 | -302.284 | 0.2580384 | 0 | 0            | 0 | 0            |
| cov1_4_5_9_10_11 | 31.4451 | -302.298 | 0.2524405 | 0 | -0.073863619 | 0 | 0            |
| cov3_4_5_7_9_10  | 31.5329 | -302.342 | 0.2592693 | 0 | 0            | 0 | 0            |
| cov3_4_5_8_9_10  | 31.536  | -302.344 | 0.2592449 | 0 | 0            | 0 | 0            |
| cov2_3_4_5_9_10  | 31.5506 | -302.351 | 0.2581447 | 0 | 0            | 0 | -0.018206163 |
| cov1_3_4_5_9_10  | 31.5868 | -302.369 | 0.2581448 | 0 | -0.015636547 | 0 | 0            |
| cov3_4_5_6_9_10  | 31.6029 | -302.377 | 0.2583544 | 0 | 0            | 0 | 0            |
| cov1_3_4_5_10_11 | 31.6618 | -302.406 | 0.2539886 | 0 | -0.059279616 | 0 | 0            |
| cov1_5_7_9_10_11 | 31.6998 | -302.425 | 0.2552189 | 0 | -0.076485319 | 0 | 0            |
| cov1_5_8_9_10_11 | 31.7003 | -302.426 | 0.2552286 | 0 | -0.076397544 | 0 | 0            |
| cov4_5_6_9_10_11 | 31.7077 | -302.429 | 0.2532496 | 0 | 0            | 0 | 0            |
| cov2_3_4_5_10_11 | 31.7192 | -302.435 | 0.2549676 | 0 | 0            | 0 | -0.038226416 |
| cov4_5_7_9_10_11 | 31.726  | -302.439 | 0.2548101 | 0 | 0            | 0 | 0            |
| cov4_5_8_9_10_11 | 31.7261 | -302.439 | 0.2548188 | 0 | 0            | 0 | 0            |
| cov2_3_5_7_9_10  | 31.7707 | -302.461 | 0.259696  | 0 | 0            | 0 | -0.036040927 |
| cov2_3_5_8_9_10  | 31.7729 | -302.462 | 0.2596702 | 0 | 0            | 0 | -0.036152464 |
| cov1_2_3_5_9_10  | 31.7746 | -302.463 | 0.2593452 | 0 | 0.021482643  | 0 | -0.045212643 |
| cov2_3_5_6_10_11 | 31.7752 | -302.463 | 0.2548089 | 0 | 0            | 0 | -0.049034838 |
| cov1_2_3_5_10_11 | 31.7888 | -302.47  | 0.2550335 | 0 | -0.022141498 | 0 | -0.047187031 |
| cov2_3_5_7_10_11 | 31.7895 | -302.47  | 0.2560309 | 0 | 0            | 0 | -0.04939351  |
| cov2_3_5_8_10_11 | 31.7909 | -302.471 | 0.2560076 | 0 | 0            | 0 | -0.049483533 |
| cov2_3_5_6_9_10  | 31.8039 | -302.478 | 0.2592661 | 0 | 0            | 0 | -0.040875212 |
| cov3_4_5_6_10_11 | 31.8039 | -302.478 | 0.2546962 | 0 | 0            | 0 | 0            |
| cov2_4_5_8_9_10  | 31.8529 | -302.502 | 0.256213  | 0 | 0            | 0 | -0.032889725 |
| cov2_4_5_7_9_10  | 31.8536 | -302.502 | 0.2562084 | 0 | 0            | 0 | -0.032884395 |
| cov3_4_5_7_10_11 | 31.8665 | -302.509 | 0.2568661 | 0 | 0            | 0 | 0            |
| cov3_4_5_8_10_11 | 31.8693 | -302.51  | 0.2568424 | 0 | 0            | 0 | 0            |
| cov1_4_5_8_9_10  | 31.8798 | -302.515 | 0.2557551 | 0 | -0.041888155 | 0 | 0            |
| cov1_4_5_7_9_10  | 31.8802 | -302.516 | 0.2557489 | 0 | -0.04190885  | 0 | 0            |
| cov1_5_6_9_10_11 | 31.902  | -302.527 | 0.2550163 | 0 | -0.057211538 | 0 | 0            |
| cov1_2_4_5_9_10  | 31.9264 | -302.539 | 0.2558467 | 0 | -0.015383122 | 0 | -0.027772202 |
| cov2_4_5_6_9_10  | 31.9344 | -302.543 | 0.2558961 | 0 | 0            | 0 | -0.032220782 |
| cov5_6_8_9_10_11 | 31.9531 | -302.552 | 0.2556159 | 0 | 0            | 0 | 0            |
| cov5_6_7_9_10_11 | 31.9564 | -302.554 | 0.2556186 | 0 | 0            | 0 | 0            |
| cov1_4_5_7_10_11 | 31.9615 | -302.556 | 0.2510848 | 0 | -0.093300684 | 0 | 0            |
| cov1_4_5_8_10_11 | 31.9638 | -302.557 | 0.2511017 | 0 | -0.093150189 | 0 | 0            |
| cov4_5_6_8_9_10  | 31.9955 | -302.573 | 0.2559774 | 0 | 0            | 0 | 0            |
| cov1_2_5_8_9_10  | 31.9956 | -302.573 | 0.2573353 | 0 | 0.00263222   | 0 | -0.047010445 |
| cov2_5_6_8_9_10  | 31.9961 | -302.574 | 0.257315  | 0 | 0            | 0 | -0.045918433 |
| cov2_5_7_8_9_10  | 31.9961 | -302.574 | 0.2573332 | 0 | 0            | 0 | -0.04618491  |
| cov1_2_5_7_9_10  | 31.9963 | -302.574 | 0.2573315 | 0 | 0.002623556  | 0 | -0.047003347 |
| cov2_5_6_7_9_10  | 31.9968 | -302.574 | 0.2573132 | 0 | 0            | 0 | -0.045949857 |
| cov4_5_6_7_9_10  | 31.9975 | -302.574 | 0.2559759 | 0 | 0            | 0 | 0            |
| cov2_3_4_5_9_11  | 32.0008 | -302.576 | 0.2558299 | 0 | 0            | 0 | -0.030847522 |
| cov1_3_4_5_9_11  | 32.0166 | -302.584 | 0.255281  | 0 | -0.041006583 | 0 | 0            |
| cov1_4_5_6_9_10  | 32.0232 | -302.587 | 0.2556196 | 0 | -0.036977727 | 0 | 0            |



|                  |         |          |           |   |              |   |              |
|------------------|---------|----------|-----------|---|--------------|---|--------------|
| cov1_2_5_6_9_10  | 32.044  | -302.598 | 0.2570635 | 0 | 0.006858081  | 0 | -0.047177687 |
| cov1_2_5_7_10_11 | 32.0504 | -302.601 | 0.252615  | 0 | -0.048062192 | 0 | -0.049333675 |
| cov1_2_5_8_10_11 | 32.051  | -302.601 | 0.2526243 | 0 | -0.047967261 | 0 | -0.04934065  |
| cov4_5_7_8_9_10  | 32.0779 | -302.615 | 0.2565797 | 0 | 0            | 0 | 0            |
| cov1_3_5_7_9_10  | 32.0879 | -302.62  | 0.2623083 | 0 | 0.00775017   | 0 | 0            |
| cov3_4_5_6_9_11  | 32.0879 | -302.62  | 0.2557654 | 0 | 0            | 0 | 0            |
| cov3_5_7_8_9_10  | 32.0915 | -302.621 | 0.2620292 | 0 | 0            | 0 | 0            |
| cov3_5_6_7_9_10  | 32.0924 | -302.622 | 0.2620122 | 0 | 0            | 0 | 0            |
| cov1_3_5_8_9_10  | 32.093  | -302.622 | 0.2622552 | 0 | 0.007100561  | 0 | 0            |
| cov3_5_6_8_9_10  | 32.0969 | -302.624 | 0.2619889 | 0 | 0            | 0 | 0            |
| cov2_5_6_8_10_11 | 32.1042 | -302.628 | 0.2524445 | 0 | 0            | 0 | -0.055718326 |
| cov2_5_6_7_10_11 | 32.1063 | -302.629 | 0.2524457 | 0 | 0            | 0 | -0.055771789 |
| cov2_3_5_6_9_11  | 32.113  | -302.632 | 0.2560204 | 0 | 0            | 0 | -0.04462119  |
| cov2_3_5_7_9_11  | 32.1137 | -302.632 | 0.2566829 | 0 | 0            | 0 | -0.044560041 |
| cov3_4_5_7_9_11  | 32.1144 | -302.633 | 0.2572657 | 0 | 0            | 0 | 0            |
| cov2_3_5_8_9_11  | 32.1145 | -302.633 | 0.2566667 | 0 | 0            | 0 | -0.044637866 |
| cov3_4_5_8_9_11  | 32.1162 | -302.634 | 0.2572467 | 0 | 0            | 0 | 0            |
| cov1_2_3_5_9_11  | 32.123  | -302.637 | 0.2562512 | 0 | -0.005649749 | 0 | -0.044999363 |
| cov2_3_4_5_7_11  | 32.1446 | -302.648 | 0.2572273 | 0 | 0            | 0 | -0.020384559 |
| cov2_3_4_5_8_11  | 32.1448 | -302.648 | 0.2572128 | 0 | 0            | 0 | -0.020469448 |
| cov2_3_4_5_6_11  | 32.1451 | -302.648 | 0.2571154 | 0 | 0            | 0 | -0.020638945 |
| cov1_2_3_4_5_11  | 32.1452 | -302.648 | 0.2571376 | 0 | 0.000228035  | 0 | -0.021115926 |
| cov2_4_5_7_10_11 | 32.1915 | -302.671 | 0.252933  | 0 | 0            | 0 | -0.054352764 |
| cov2_4_5_8_10_11 | 32.1918 | -302.671 | 0.2529408 | 0 | 0            | 0 | -0.054356447 |
| cov1_3_7_9_10_11 | 32.1985 | -302.675 | 0.2625957 | 0 | 0.06695763   | 0 | 0            |
| cov1_3_4_5_7_11  | 32.199  | -302.675 | 0.2572945 | 0 | -0.014435424 | 0 | 0            |
| cov1_3_4_5_6_11  | 32.1992 | -302.675 | 0.2571838 | 0 | -0.014641876 | 0 | 0            |
| cov1_3_4_5_8_11  | 32.1992 | -302.675 | 0.2572725 | 0 | -0.01471903  | 0 | 0            |
| cov1_2_4_5_10_11 | 32.2002 | -302.676 | 0.251818  | 0 | -0.053589855 | 0 | -0.033536694 |
| cov1_3_5_6_9_10  | 32.2054 | -302.678 | 0.2608743 | 0 | -0.008727933 | 0 | 0            |
| cov3_4_5_6_7_11  | 32.2086 | -302.68  | 0.2575539 | 0 | 0            | 0 | 0            |
| cov3_4_5_6_8_11  | 32.2093 | -302.68  | 0.257532  | 0 | 0            | 0 | 0            |
| cov1_3_8_9_10_11 | 32.211  | -302.681 | 0.2625356 | 0 | 0.066682682  | 0 | 0            |
| cov3_4_5_7_8_11  | 32.2151 | -302.683 | 0.2578551 | 0 | 0            | 0 | 0            |
| cov2_5_7_8_10_11 | 32.2217 | -302.686 | 0.2533355 | 0 | 0            | 0 | -0.061286417 |
| cov5_7_8_9_10_11 | 32.2236 | -302.687 | 0.2574242 | 0 | 0            | 0 | 0            |
| cov1_3_5_6_10_11 | 32.2325 | -302.692 | 0.2564761 | 0 | -0.043470224 | 0 | 0            |
| cov1_3_5_7_10_11 | 32.2357 | -302.693 | 0.2575328 | 0 | -0.045051821 | 0 | 0            |
| cov1_3_5_8_10_11 | 32.2368 | -302.694 | 0.2575043 | 0 | -0.045406743 | 0 | 0            |
| cov1_2_5_6_10_11 | 32.2508 | -302.701 | 0.2524408 | 0 | -0.0284912   | 0 | -0.048934848 |
| cov3_5_6_7_10_11 | 32.265  | -302.708 | 0.2580293 | 0 | 0            | 0 | 0            |
| cov2_4_5_6_10_11 | 32.2695 | -302.71  | 0.2520731 | 0 | 0            | 0 | -0.046974075 |
| cov3_5_6_8_10_11 | 32.2697 | -302.71  | 0.258002  | 0 | 0            | 0 | 0            |
| cov1_2_3_5_7_11  | 32.2737 | -302.712 | 0.2583394 | 0 | 0.021757624  | 0 | -0.042670045 |
| cov1_2_3_5_8_11  | 32.2746 | -302.713 | 0.2583092 | 0 | 0.021371484  | 0 | -0.042693033 |
| cov1_2_3_5_6_11  | 32.2797 | -302.715 | 0.2578799 | 0 | 0.019213704  | 0 | -0.042942572 |
| cov1_4_5_7_9_11  | 32.2991 | -302.725 | 0.2523841 | 0 | -0.075190287 | 0 | 0            |

|                  |         |          |           |   |              |   |              |
|------------------|---------|----------|-----------|---|--------------|---|--------------|
| cov1_4_5_8_9_11  | 32.3006 | -302.726 | 0.2524012 | 0 | -0.075053334 | 0 | 0            |
| cov2_3_5_6_7_11  | 32.3021 | -302.727 | 0.2580411 | 0 | 0            | 0 | -0.038773137 |
| cov2_3_5_6_8_11  | 32.3021 | -302.727 | 0.2580261 | 0 | 0            | 0 | -0.038826126 |
| cov2_3_5_7_8_11  | 32.3051 | -302.728 | 0.2578738 | 0 | 0            | 0 | -0.03771746  |
| cov1_4_5_6_10_11 | 32.3211 | -302.736 | 0.2514751 | 0 | -0.07036412  | 0 | 0            |
| cov1_2_3_9_10_11 | 32.3589 | -302.755 | 0.2591428 | 0 | 0.09191713   | 0 | -0.042886783 |
| cov3_5_7_8_10_11 | 32.3664 | -302.759 | 0.2594659 | 0 | 0            | 0 | 0            |
| cov1_2_5_7_9_11  | 32.3722 | -302.762 | 0.2538192 | 0 | -0.031951919 | 0 | -0.047183535 |
| cov1_2_5_8_9_11  | 32.3724 | -302.762 | 0.2538286 | 0 | -0.03186443  | 0 | -0.047192031 |
| cov4_5_6_8_10_11 | 32.3795 | -302.765 | 0.25224   | 0 | 0            | 0 | 0            |
| cov4_5_6_7_10_11 | 32.3834 | -302.767 | 0.2522442 | 0 | 0            | 0 | 0            |
| cov2_5_6_8_9_11  | 32.3932 | -302.772 | 0.2536784 | 0 | 0            | 0 | -0.051379565 |
| cov2_5_6_7_9_11  | 32.3949 | -302.773 | 0.2536794 | 0 | 0            | 0 | -0.051438668 |
| cov2_4_5_8_9_11  | 32.401  | -302.776 | 0.2538095 | 0 | 0            | 0 | -0.04667939  |
| cov2_4_5_7_9_11  | 32.4011 | -302.776 | 0.2538007 | 0 | 0            | 0 | -0.046676107 |
| cov1_2_4_5_7_11  | 32.4019 | -302.777 | 0.2544103 | 0 | -0.029773441 | 0 | -0.024352325 |
| cov1_2_4_5_8_11  | 32.4019 | -302.777 | 0.2544137 | 0 | -0.029677572 | 0 | -0.024437162 |
| cov2_3_4_5_7_10  | 32.4096 | -302.78  | 0.2580078 | 0 | 0            | 0 | -0.016462594 |
| cov2_3_4_5_8_10  | 32.4118 | -302.782 | 0.2579827 | 0 | 0            | 0 | -0.016579223 |
| cov2_4_5_6_8_11  | 32.4394 | -302.795 | 0.2544254 | 0 | 0            | 0 | -0.034170088 |
| cov2_4_5_6_7_11  | 32.441  | -302.796 | 0.2544247 | 0 | 0            | 0 | -0.034278379 |
| cov1_3_4_5_7_10  | 32.4434 | -302.797 | 0.2580076 | 0 | -0.013048006 | 0 | 0            |
| cov1_3_4_5_8_10  | 32.4454 | -302.798 | 0.2579687 | 0 | -0.01347232  | 0 | 0            |
| cov2_5_7_8_9_11  | 32.4473 | -302.799 | 0.2542994 | 0 | 0            | 0 | -0.055210767 |
| cov3_4_5_6_7_10  | 32.448  | -302.8   | 0.2582137 | 0 | 0            | 0 | 0            |
| cov3_4_5_6_8_10  | 32.451  | -302.801 | 0.2581941 | 0 | 0            | 0 | 0            |
| cov1_2_3_4_5_10  | 32.4523 | -302.802 | 0.257108  | 0 | -0.012154123 | 0 | -0.015479154 |
| cov3_4_5_7_8_10  | 32.4557 | -302.803 | 0.2585424 | 0 | 0            | 0 | 0            |
| cov2_3_4_5_6_10  | 32.4562 | -302.804 | 0.2571562 | 0 | 0            | 0 | -0.018622387 |
| cov1_5_6_8_9_10  | 32.4619 | -302.807 | 0.2587502 | 0 | -0.02929432  | 0 | 0            |
| cov1_5_6_7_9_10  | 32.4628 | -302.807 | 0.2587492 | 0 | -0.029449407 | 0 | 0            |
| cov1_5_7_8_9_10  | 32.4649 | -302.808 | 0.2588445 | 0 | -0.033363605 | 0 | 0            |
| cov2_4_5_7_8_11  | 32.4668 | -302.809 | 0.2546913 | 0 | 0            | 0 | -0.039633646 |
| cov1_4_5_7_8_11  | 32.4736 | -302.812 | 0.2542904 | 0 | -0.050302542 | 0 | 0            |
| cov1_4_5_6_7_11  | 32.4738 | -302.812 | 0.2542643 | 0 | -0.048795976 | 0 | 0            |
| cov1_4_5_6_8_11  | 32.474  | -302.813 | 0.2542672 | 0 | -0.048283175 | 0 | 0            |
| cov1_3_4_5_6_10  | 32.4807 | -302.816 | 0.2570997 | 0 | -0.022066394 | 0 | 0            |
| cov5_6_7_8_9_10  | 32.5212 | -302.836 | 0.2587426 | 0 | 0            | 0 | 0            |
| cov1_2_5_6_8_11  | 32.5228 | -302.837 | 0.2554151 | 0 | -0.00685531  | 0 | -0.045146711 |
| cov1_2_5_6_7_11  | 32.5238 | -302.837 | 0.2554222 | 0 | -0.007223589 | 0 | -0.045144395 |
| cov1_2_5_7_8_11  | 32.5249 | -302.838 | 0.2554837 | 0 | -0.010487428 | 0 | -0.045265581 |
| cov2_5_6_7_8_11  | 32.5257 | -302.838 | 0.2553512 | 0 | 0            | 0 | -0.046621195 |
| cov1_3_5_7_9_11  | 32.5331 | -302.842 | 0.25852   | 0 | -0.028602064 | 0 | 0            |
| cov1_3_5_8_9_11  | 32.5342 | -302.843 | 0.2584897 | 0 | -0.028991568 | 0 | 0            |
| cov1_5_6_8_10_11 | 32.537  | -302.844 | 0.2540248 | 0 | -0.07084803  | 0 | 0            |
| cov1_5_6_7_10_11 | 32.5377 | -302.844 | 0.2540253 | 0 | -0.071220944 | 0 | 0            |
| cov1_3_5_6_9_11  | 32.5378 | -302.844 | 0.2576371 | 0 | -0.029203918 | 0 | 0            |

|                  |         |          |           |   |              |              |
|------------------|---------|----------|-----------|---|--------------|--------------|
| cov3_5_6_7_9_11  | 32.5399 | -302.846 | 0.2587705 | 0 | 0            | 0            |
| cov1_2_4_5_9_11  | 32.5418 | -302.846 | 0.2531041 | 0 | -0.035943265 | -0.032840629 |
| cov3_5_6_8_9_11  | 32.543  | -302.847 | 0.258747  | 0 | 0            | 0            |
| cov1_5_7_8_10_11 | 32.5659 | -302.859 | 0.2544011 | 0 | -0.08292345  | 0            |
| cov2_4_5_6_9_11  | 32.5717 | -302.861 | 0.2532488 | 0 | 0            | -0.041832519 |
| cov3_5_7_8_9_11  | 32.5851 | -302.868 | 0.259755  | 0 | 0            | 0            |
| cov4_5_6_8_9_11  | 32.5859 | -302.869 | 0.2533091 | 0 | 0            | 0            |
| cov4_5_6_7_9_11  | 32.5892 | -302.87  | 0.253311  | 0 | 0            | 0            |
| cov3_7_8_9_10    | 32.5895 | -306.385 | 0.2643264 | 0 | 0            | 0            |
| cov1_2_5_6_9_11  | 32.5909 | -302.871 | 0.2537144 | 0 | -0.015378163 | -0.046839431 |
| cov1_2_3_5_7_10  | 32.5932 | -302.872 | 0.259461  | 0 | 0.025832906  | -0.042039385 |
| cov1_2_3_5_8_10  | 32.5968 | -302.874 | 0.2594167 | 0 | 0.025309551  | -0.042060939 |
| cov2_3_5_6_7_10  | 32.6334 | -302.892 | 0.2590247 | 0 | 0            | -0.037406135 |
| cov1_2_3_7_9_10  | 32.6343 | -302.893 | 0.2648321 | 0 | 0.13871205   | -0.037730196 |
| cov2_3_5_6_8_10  | 32.6353 | -302.893 | 0.2590036 | 0 | 0            | -0.037517577 |
| cov2_3_5_7_8_10  | 32.636  | -302.894 | 0.2588701 | 0 | 0            | -0.036536449 |
| cov4_5_6_7_8_11  | 32.6426 | -302.897 | 0.2542979 | 0 | 0            | 0            |
| cov1_2_3_8_9_10  | 32.6544 | -302.903 | 0.2647737 | 0 | 0.13855686   | -0.037701261 |
| cov3_5_6_7_8_11  | 32.6548 | -302.903 | 0.2598328 | 0 | 0            | 0            |
| cov1_3_5_6_7_11  | 32.6555 | -302.903 | 0.25976   | 0 | -0.003726985 | 0            |
| cov1_3_5_6_8_11  | 32.657  | -302.904 | 0.2597412 | 0 | -0.004323438 | 0            |
| cov1_3_5_7_8_11  | 32.6583 | -302.905 | 0.2598829 | 0 | -0.008339303 | 0            |
| cov1_2_3_5_6_10  | 32.6665 | -302.909 | 0.2582757 | 0 | 0.01467026   | -0.042820795 |
| cov1_4_5_6_9_11  | 32.6673 | -302.909 | 0.2528146 | 0 | -0.055428998 | 0            |
| cov1_2_4_5_8_10  | 32.6889 | -302.92  | 0.2550063 | 0 | -0.031937811 | -0.019957029 |
| cov1_2_4_5_7_10  | 32.6893 | -302.92  | 0.2550008 | 0 | -0.031985349 | -0.019922743 |
| cov1_2_4_5_6_11  | 32.7173 | -302.934 | 0.254929  | 0 | -0.008273679 | -0.032698727 |
| cov2_4_5_6_8_10  | 32.727  | -302.939 | 0.2551272 | 0 | 0            | -0.029898627 |
| cov2_4_5_6_7_10  | 32.7283 | -302.94  | 0.2551298 | 0 | 0            | -0.029965658 |
| cov4_5_7_8_10_11 | 32.7331 | -302.942 | 0.2542331 | 0 | 0            | 0            |
| cov1_4_5_6_8_10  | 32.7359 | -302.944 | 0.2548342 | 0 | -0.046162112 | 0            |
| cov1_4_5_6_7_10  | 32.7363 | -302.944 | 0.2548265 | 0 | -0.046443848 | 0            |
| cov1_4_5_7_8_10  | 32.7374 | -302.944 | 0.2548835 | 0 | -0.049299823 | 0            |
| cov1_3_6_9_10_11 | 32.7459 | -302.949 | 0.2605308 | 0 | 0.061542259  | 0            |
| cov1_3_4_9_10_11 | 32.7475 | -302.949 | 0.260686  | 0 | 0.056099613  | 0            |
| cov3_6_7_9_10_11 | 32.7477 | -302.949 | 0.2620964 | 0 | 0            | 0            |
| cov3_6_8_9_10_11 | 32.7479 | -302.95  | 0.2620873 | 0 | 0            | 0            |
| cov2_3_4_5_7_9   | 32.7495 | -302.95  | 0.2586613 | 0 | 0            | -0.010321189 |
| cov2_3_4_5_8_9   | 32.751  | -302.951 | 0.2586399 | 0 | 0            | -0.010430079 |
| cov2_4_5_7_8_10  | 32.757  | -302.954 | 0.2554664 | 0 | 0            | -0.035117707 |
| cov3_4_5_7_8_9   | 32.767  | -302.959 | 0.2589987 | 0 | 0            | 0            |
| cov1_3_4_5_7_9   | 32.7671 | -302.959 | 0.2591197 | 0 | 0.003108338  | 0            |
| cov3_4_5_6_7_9   | 32.7674 | -302.959 | 0.2590684 | 0 | 0            | 0            |
| cov1_3_4_5_8_9   | 32.7692 | -302.96  | 0.2590801 | 0 | 0.002648658  | 0            |
| cov3_4_5_6_8_9   | 32.7693 | -302.96  | 0.2590494 | 0 | 0            | 0            |
| cov1_2_3_4_5_9   | 32.7718 | -302.962 | 0.2582973 | 0 | 0.004486921  | -0.015091999 |
| cov2_3_4_5_6_9   | 32.7723 | -302.962 | 0.2582815 | 0 | 0            | -0.01393534  |

|                  |         |          |           |   |              |   |              |
|------------------|---------|----------|-----------|---|--------------|---|--------------|
| cov1_2_4_5_6_10  | 32.7959 | -302.974 | 0.254925  | 0 | -0.020483496 | 0 | -0.025542273 |
| cov1_3_4_5_6_9   | 32.7995 | -302.975 | 0.2583354 | 0 | -0.008201579 | 0 | 0            |
| cov4_5_7_8_9_11  | 32.8027 | -302.977 | 0.2548869 | 0 | 0            | 0 | 0            |
| cov1_5_6_8_9_11  | 32.8286 | -302.99  | 0.2551723 | 0 | -0.056942041 | 0 | 0            |
| cov1_5_6_7_9_11  | 32.8294 | -302.99  | 0.2551722 | 0 | -0.05731343  | 0 | 0            |
| cov1_5_7_8_9_11  | 32.8443 | -302.998 | 0.2554563 | 0 | -0.06589228  | 0 | 0            |
| cov5_6_7_8_10_11 | 32.851  | -303.001 | 0.2547899 | 0 | 0            | 0 | 0            |
| cov1_2_5_6_8_10  | 32.8605 | -303.006 | 0.2563855 | 0 | -0.002431805 | 0 | -0.044523821 |
| cov2_5_6_7_8_10  | 32.8607 | -303.006 | 0.2563691 | 0 | 0            | 0 | -0.044998854 |
| cov1_2_5_6_7_10  | 32.8613 | -303.006 | 0.2563799 | 0 | -0.002581837 | 0 | -0.044524505 |
| cov1_2_5_7_8_10  | 32.8642 | -303.008 | 0.2564757 | 0 | -0.006855721 | 0 | -0.04466475  |
| cov1_2_3_7_10_11 | 32.8797 | -303.015 | 0.2601869 | 0 | 0.093035368  | 0 | -0.039502919 |
| cov4_5_6_7_8_10  | 32.8831 | -303.017 | 0.2550952 | 0 | 0            | 0 | 0            |
| cov1_2_3_8_10_11 | 32.891  | -303.021 | 0.2601307 | 0 | 0.092773945  | 0 | -0.039499039 |
| cov1_2_3_4_5_7   | 32.8925 | -303.022 | 0.2608345 | 0 | 0.038857347  | 0 | -0.016157916 |
| cov1_2_3_4_5_8   | 32.8951 | -303.023 | 0.2607903 | 0 | 0.038275535  | 0 | -0.016088021 |
| cov1_2_3_5_7_9   | 32.8977 | -303.024 | 0.260483  | 0 | 0.040142218  | 0 | -0.040091529 |
| cov1_2_3_5_8_9   | 32.9013 | -303.026 | 0.2604365 | 0 | 0.039589497  | 0 | -0.040115527 |
| cov1_2_3_4_7_11  | 32.9039 | -303.028 | 0.2609611 | 0 | 0.092227055  | 0 | -0.052063997 |
| cov1_2_3_4_8_11  | 32.9123 | -303.032 | 0.2609082 | 0 | 0.091919659  | 0 | -0.052206371 |
| cov1_3_4_5_6_7   | 32.9198 | -303.036 | 0.2608503 | 0 | 0.020162153  | 0 | 0            |
| cov1_2_3_4_5_6   | 32.9212 | -303.036 | 0.260074  | 0 | 0.021622962  | 0 | -0.015070685 |
| cov1_3_4_5_6_8   | 32.9218 | -303.037 | 0.2608151 | 0 | 0.019506255  | 0 | 0            |
| cov1_3_4_5_7_8   | 32.9227 | -303.037 | 0.2608082 | 0 | 0.025527041  | 0 | 0            |
| cov1_3_4_7_9_10  | 32.9302 | -303.041 | 0.2659811 | 0 | 0.11085563   | 0 | 0            |
| cov1_3_7_8_9_10  | 32.9355 | -303.043 | 0.2660772 | 0 | 0.10678454   | 0 | 0            |
| cov1_3_6_7_9_10  | 32.9366 | -303.044 | 0.2660821 | 0 | 0.10612752   | 0 | 0            |
| cov2_3_4_5_6_7   | 32.9381 | -303.045 | 0.2605231 | 0 | 0            | 0 | -0.005984894 |
| cov2_3_4_5_6_8   | 32.9386 | -303.045 | 0.2605076 | 0 | 0            | 0 | -0.006067436 |
| cov3_4_5_6_7_8   | 32.9434 | -303.047 | 0.2605761 | 0 | 0            | 0 | 0            |
| cov1_3_4_8_9_10  | 32.9503 | -303.051 | 0.2659247 | 0 | 0.11056743   | 0 | 0            |
| cov1_3_6_8_9_10  | 32.9559 | -303.054 | 0.2660405 | 0 | 0.10500216   | 0 | 0            |
| cov1_5_6_7_8_11  | 32.9566 | -303.054 | 0.2567    | 0 | -0.040298346 | 0 | 0            |
| cov3_5_6_7_8_10  | 32.96   | -303.056 | 0.2609099 | 0 | 0            | 0 | 0            |
| cov1_3_5_6_7_10  | 32.9608 | -303.056 | 0.2609591 | 0 | 0.002386744  | 0 | 0            |
| cov1_2_3_5_6_9   | 32.9634 | -303.057 | 0.2594388 | 0 | 0.026792901  | 0 | -0.040929214 |
| cov1_3_5_6_8_10  | 32.9654 | -303.058 | 0.2609163 | 0 | 0.00143177   | 0 | 0            |
| cov1_3_5_7_8_10  | 32.9657 | -303.058 | 0.2610898 | 0 | -0.003146305 | 0 | 0            |
| cov2_3_5_6_7_9   | 32.9788 | -303.065 | 0.2599742 | 0 | 0            | 0 | -0.033841443 |
| cov2_3_5_6_8_9   | 32.9799 | -303.066 | 0.2599572 | 0 | 0            | 0 | -0.033930185 |
| cov1_2_3_7_9_11  | 32.982  | -303.067 | 0.2607873 | 0 | 0.096761047  | 0 | -0.038537332 |
| cov1_2_3_6_7_11  | 32.9825 | -303.067 | 0.2608366 | 0 | 0.10039844   | 0 | -0.03832693  |
| cov1_2_3_7_8_11  | 32.9832 | -303.067 | 0.2608988 | 0 | 0.097459355  | 0 | -0.038432159 |
| cov2_3_4_5_7_8   | 32.9866 | -303.069 | 0.2600875 | 0 | 0            | 0 | 0.00054404   |
| cov1_2_3_8_9_11  | 32.9922 | -303.072 | 0.2607342 | 0 | 0.096516337  | 0 | -0.038536859 |
| cov1_2_3_6_8_11  | 32.9931 | -303.072 | 0.2607904 | 0 | 0.099508178  | 0 | -0.038351565 |
| cov1_2_4_5_8_9   | 32.9981 | -303.075 | 0.2561976 | 0 | -0.015590034 | 0 | -0.019388964 |

|                  |         |          |           |   |              |   |              |
|------------------|---------|----------|-----------|---|--------------|---|--------------|
| cov1_2_4_5_7_9   | 32.9988 | -303.075 | 0.2561916 | 0 | -0.015627904 | 0 | -0.019362485 |
| cov2_3_5_7_8_9   | 33.0005 | -303.076 | 0.2595424 | 0 | 0            | 0 | -0.031541244 |
| cov3_4_7_9_10_11 | 33.0057 | -303.078 | 0.2609056 | 0 | 0            | 0 | 0            |
| cov2_4_5_6_8_9   | 33.0097 | -303.08  | 0.256285  | 0 | 0            | 0 | -0.024757556 |
| cov2_4_5_6_7_9   | 33.0108 | -303.081 | 0.2562845 | 0 | 0            | 0 | -0.024827265 |
| cov3_4_8_9_10_11 | 33.0111 | -303.081 | 0.2608734 | 0 | 0            | 0 | 0            |
| cov2_4_5_7_8_9   | 33.0143 | -303.083 | 0.2564218 | 0 | 0            | 0 | -0.026803823 |
| cov1_2_3_5_6_7   | 33.0303 | -303.091 | 0.2619759 | 0 | 0.055867966  | 0 | -0.038510975 |
| cov1_2_3_5_7_8   | 33.0304 | -303.091 | 0.2619358 | 0 | 0.059268753  | 0 | -0.03840099  |
| cov5_6_7_8_9_11  | 33.032  | -303.092 | 0.2557559 | 0 | 0            | 0 | 0            |
| cov1_2_3_5_6_8   | 33.0338 | -303.093 | 0.2619353 | 0 | 0.055049221  | 0 | -0.038548321 |
| cov1_4_5_7_8_9   | 33.044  | -303.098 | 0.2560662 | 0 | -0.032552228 | 0 | 0            |
| cov1_4_5_6_8_9   | 33.0441 | -303.098 | 0.2560667 | 0 | -0.032490732 | 0 | 0            |
| cov1_4_5_6_7_9   | 33.0446 | -303.098 | 0.2560648 | 0 | -0.032777058 | 0 | 0            |
| cov3_4_6_9_10_11 | 33.0724 | -303.112 | 0.2608744 | 0 | 0            | 0 | 0            |
| cov2_3_6_9_10_11 | 33.0938 | -303.122 | 0.2599904 | 0 | 0            | 0 | -0.014580535 |
| cov2_3_4_9_10_11 | 33.1069 | -303.129 | 0.2589323 | 0 | 0            | 0 | -0.032232942 |
| cov1_2_4_5_6_9   | 33.1117 | -303.131 | 0.2561534 | 0 | -0.007029963 | 0 | -0.025080331 |
| cov4_5_6_7_8_9   | 33.1171 | -303.134 | 0.2562285 | 0 | 0            | 0 | 0            |
| cov1_2_4_9_10_11 | 33.1361 | -303.144 | 0.2573958 | 0 | 0.083733177  | 0 | -0.086938094 |
| cov1_2_3_4_10_11 | 33.1389 | -303.145 | 0.258443  | 0 | 0.075282005  | 0 | -0.064534421 |
| cov1_2_4_5_6_8   | 33.1448 | -303.148 | 0.2579344 | 0 | 0.002075942  | 0 | -0.019281465 |
| cov2_4_5_6_7_8   | 33.145  | -303.148 | 0.2579461 | 0 | 0            | 0 | -0.018483274 |
| cov1_2_4_5_6_7   | 33.1456 | -303.148 | 0.2579335 | 0 | 0.001806157  | 0 | -0.01925578  |
| cov1_2_4_5_7_8   | 33.1478 | -303.15  | 0.2578963 | 0 | 0.006690824  | 0 | -0.019306399 |
| cov1_2_5_6_8_9   | 33.1532 | -303.152 | 0.2575354 | 0 | 0.009334413  | 0 | -0.042644201 |
| cov1_2_5_7_8_9   | 33.1534 | -303.152 | 0.257563  | 0 | 0.007980275  | 0 | -0.04269186  |
| cov1_2_5_6_7_9   | 33.1541 | -303.153 | 0.2575322 | 0 | 0.009176114  | 0 | -0.042644609 |
| cov2_5_6_7_8_9   | 33.1583 | -303.155 | 0.2575916 | 0 | 0            | 0 | -0.040703702 |
| cov1_4_5_6_7_8   | 33.1901 | -303.171 | 0.2577995 | 0 | -0.01492037  | 0 | 0            |
| cov2_3_5_6_7_8   | 33.1936 | -303.172 | 0.2618016 | 0 | 0            | 0 | -0.0287868   |
| cov1_2_3_4_6_11  | 33.1994 | -303.175 | 0.2590784 | 0 | 0.085368753  | 0 | -0.06035694  |
| cov1_3_6_7_10_11 | 33.1999 | -303.176 | 0.2614377 | 0 | 0.069493349  | 0 | 0            |
| cov1_2_3_4_9_11  | 33.2028 | -303.177 | 0.2592162 | 0 | 0.081186957  | 0 | -0.060162004 |
| cov1_3_4_7_10_11 | 33.2079 | -303.18  | 0.261568  | 0 | 0.064199272  | 0 | 0            |
| cov1_3_7_8_10_11 | 33.2102 | -303.181 | 0.2616356 | 0 | 0.061699112  | 0 | 0            |
| cov1_3_6_8_10_11 | 33.2131 | -303.182 | 0.2613943 | 0 | 0.068476886  | 0 | 0            |
| cov1_3_4_8_10_11 | 33.2194 | -303.185 | 0.2615116 | 0 | 0.063827132  | 0 | 0            |
| cov1_2_3_4_9_10  | 33.2269 | -303.189 | 0.2630485 | 0 | 0.12532178   | 0 | -0.061526692 |
| cov1_3_5_6_7_9   | 33.2365 | -303.194 | 0.261924  | 0 | 0.014482821  | 0 | 0            |
| cov1_3_5_7_8_9   | 33.2365 | -303.194 | 0.2619869 | 0 | 0.012156639  | 0 | 0            |
| cov1_3_5_6_8_9   | 33.2408 | -303.196 | 0.2618823 | 0 | 0.013557301  | 0 | 0            |
| cov3_5_6_7_8_9   | 33.2469 | -303.199 | 0.2616465 | 0 | 0            | 0 | 0            |
| cov1_2_5_6_7_8   | 33.2803 | -303.216 | 0.2590546 | 0 | 0.024303377  | 0 | -0.041102419 |
| cov1_5_6_7_8_10  | 33.2814 | -303.216 | 0.2577798 | 0 | -0.034674035 | 0 | 0            |
| cov1_3_4_6_7_11  | 33.2865 | -303.219 | 0.261995  | 0 | 0.074808506  | 0 | 0            |
| cov1_3_4_7_8_11  | 33.2888 | -303.22  | 0.2620824 | 0 | 0.07073388   | 0 | 0            |

|                  |         |          |           |   |              |   |              |
|------------------|---------|----------|-----------|---|--------------|---|--------------|
| cov1_3_4_7_9_11  | 33.2893 | -303.22  | 0.262055  | 0 | 0.070452982  | 0 | 0            |
| cov1_3_6_7_8_11  | 33.293  | -303.222 | 0.2621147 | 0 | 0.071395146  | 0 | 0            |
| cov1_3_6_7_9_11  | 33.293  | -303.222 | 0.2620337 | 0 | 0.070903023  | 0 | 0            |
| cov1_3_7_8_9_11  | 33.2964 | -303.224 | 0.2621643 | 0 | 0.066104432  | 0 | 0            |
| cov1_3_4_6_8_11  | 33.2979 | -303.225 | 0.2619491 | 0 | 0.073778493  | 0 | 0            |
| cov1_3_4_8_9_11  | 33.2999 | -303.226 | 0.2620024 | 0 | 0.070094892  | 0 | 0            |
| cov2_3_7_9_10_11 | 33.3019 | -303.227 | 0.2601849 | 0 | 0            | 0 | 0.013157285  |
| cov1_3_6_8_9_11  | 33.3042 | -303.228 | 0.2619942 | 0 | 0.069989227  | 0 | 0            |
| cov2_3_8_9_10_11 | 33.3076 | -303.229 | 0.2601455 | 0 | 0            | 0 | 0.013056006  |
| cov1_3_5_6_7_8   | 33.3432 | -303.247 | 0.2632101 | 0 | 0.029128698  | 0 | 0            |
| cov3_7_8_9_10_11 | 33.3673 | -303.259 | 0.2591765 | 0 | 0            | 0 | 0            |
| cov1_2_3_6_10_11 | 33.3901 | -303.271 | 0.2581818 | 0 | 0.088996304  | 0 | -0.039968692 |
| cov1_2_3_6_9_11  | 33.3909 | -303.271 | 0.2590483 | 0 | 0.091060353  | 0 | -0.039186066 |
| cov1_2_3_6_9_10  | 33.464  | -303.308 | 0.2630838 | 0 | 0.12867726   | 0 | -0.037812639 |
| cov1_2_3_4_7_10  | 33.5299 | -303.341 | 0.2637761 | 0 | 0.12326197   | 0 | -0.051498295 |
| cov1_5_6_7_8_9   | 33.5397 | -303.345 | 0.2588095 | 0 | -0.021939046 | 0 | 0            |
| cov1_2_3_4_8_10  | 33.546  | -303.349 | 0.2637163 | 0 | 0.12306577   | 0 | -0.051628778 |
| cov1_2_3_7_8_10  | 33.6368 | -303.394 | 0.2638278 | 0 | 0.12996611   | 0 | -0.035157793 |
| cov2_3_4_6_8_11  | 33.6378 | -303.394 | 0.2616407 | 0 | 0            | 0 | -0.03009433  |
| cov1_2_3_6_7_10  | 33.6379 | -303.395 | 0.2638223 | 0 | 0.12994765   | 0 | -0.035150398 |
| cov2_3_4_6_7_11  | 33.6386 | -303.395 | 0.2616559 | 0 | 0            | 0 | -0.029986924 |
| cov3_4_6_7_10_11 | 33.642  | -303.397 | 0.2614206 | 0 | 0            | 0 | 0            |
| cov3_4_6_8_10_11 | 33.6438 | -303.397 | 0.2614037 | 0 | 0            | 0 | 0            |
| cov1_2_3_4_7_9   | 33.6462 | -303.399 | 0.264313  | 0 | 0.12747798   | 0 | -0.047876003 |
| cov1_2_3_4_7_8   | 33.65   | -303.401 | 0.2644855 | 0 | 0.12879688   | 0 | -0.047004786 |
| cov1_2_3_4_6_7   | 33.6508 | -303.401 | 0.2645081 | 0 | 0.12650555   | 0 | -0.047007338 |
| cov1_2_3_6_8_10  | 33.6559 | -303.404 | 0.2637813 | 0 | 0.12885759   | 0 | -0.035155548 |
| cov1_2_3_4_8_9   | 33.6612 | -303.406 | 0.2642616 | 0 | 0.12728839   | 0 | -0.048013627 |
| cov1_2_3_4_6_8   | 33.6649 | -303.408 | 0.2644662 | 0 | 0.12555394   | 0 | -0.04716693  |
| cov2_3_6_8_10_11 | 33.6757 | -303.413 | 0.260685  | 0 | 0            | 0 | -0.010452502 |
| cov2_3_6_7_10_11 | 33.6767 | -303.414 | 0.2607002 | 0 | 0            | 0 | -0.010234238 |
| cov2_3_4_6_10_11 | 33.6864 | -303.419 | 0.2591077 | 0 | 0            | 0 | -0.044484283 |
| cov3_6_7_8_10_11 | 33.7039 | -303.428 | 0.2611074 | 0 | 0            | 0 | 0            |
| cov1_3_4_6_9_11  | 33.7157 | -303.433 | 0.260386  | 0 | 0.059823451  | 0 | 0            |
| cov1_2_3_6_7_8   | 33.7189 | -303.435 | 0.264445  | 0 | 0.13058235   | 0 | -0.034358468 |
| cov1_2_3_6_7_9   | 33.7198 | -303.435 | 0.26441   | 0 | 0.13023697   | 0 | -0.034385948 |
| cov1_2_3_7_8_9   | 33.7198 | -303.435 | 0.2643687 | 0 | 0.13318332   | 0 | -0.034296878 |
| cov1_3_4_6_10_11 | 33.7218 | -303.437 | 0.2596584 | 0 | 0.055122846  | 0 | 0            |
| cov1_2_3_6_8_9   | 33.7356 | -303.443 | 0.2643725 | 0 | 0.12924924   | 0 | -0.034395213 |
| cov2_3_4_7_10_11 | 33.7596 | -303.455 | 0.2593793 | 0 | 0            | 0 | -0.025721263 |
| cov1_3_4_6_9_10  | 33.7607 | -303.456 | 0.2643579 | 0 | 0.094885615  | 0 | 0            |
| cov2_3_4_8_10_11 | 33.7634 | -303.457 | 0.2593475 | 0 | 0            | 0 | -0.025864211 |
| cov3_4_6_7_9_11  | 33.7692 | -303.46  | 0.2619731 | 0 | 0            | 0 | 0            |
| cov3_4_6_8_9_11  | 33.7701 | -303.461 | 0.2619601 | 0 | 0            | 0 | 0            |
| cov3_4_6_7_8_11  | 33.779  | -303.465 | 0.2622149 | 0 | 0            | 0 | 0            |
| cov2_3_6_8_9_11  | 33.7943 | -303.473 | 0.2613449 | 0 | 0            | 0 | -0.009337623 |
| cov2_3_4_6_9_11  | 33.7948 | -303.473 | 0.2599661 | 0 | 0            | 0 | -0.039418188 |

|                  |         |          |           |   |             |   |              |
|------------------|---------|----------|-----------|---|-------------|---|--------------|
| cov2_4_6_9_10_11 | 33.795  | -303.473 | 0.2582336 | 0 | 0           | 0 | -0.065239823 |
| cov2_3_6_7_9_11  | 33.7956 | -303.473 | 0.2613563 | 0 | 0           | 0 | -0.009150593 |
| cov2_3_6_7_8_11  | 33.8011 | -303.476 | 0.2615871 | 0 | 0           | 0 | -0.008971268 |
| cov3_6_7_8_9_11  | 33.8171 | -303.484 | 0.2617102 | 0 | 0           | 0 | 0            |
| cov3_4_7_8_10_11 | 33.8658 | -303.509 | 0.2602302 | 0 | 0           | 0 | 0            |
| cov1_2_4_8_9_10  | 33.8741 | -303.513 | 0.2608662 | 0 | 0.11904448  | 0 | -0.0792167   |
| cov1_2_4_7_9_10  | 33.8742 | -303.513 | 0.2608644 | 0 | 0.1190447   | 0 | -0.079239041 |
| cov1_2_4_6_9_10  | 33.8743 | -303.513 | 0.2608623 | 0 | 0.11875575  | 0 | -0.079355301 |
| cov1_3_4_7_8_10  | 33.8984 | -303.525 | 0.2649462 | 0 | 0.10209178  | 0 | 0            |
| cov1_3_4_6_7_10  | 33.8991 | -303.525 | 0.2649205 | 0 | 0.10332098  | 0 | 0            |
| cov1_3_6_7_8_10  | 33.8992 | -303.525 | 0.2649577 | 0 | 0.10212077  | 0 | 0            |
| cov1_3_4_6_8_10  | 33.9174 | -303.534 | 0.2648812 | 0 | 0.10213336  | 0 | 0            |
| cov1_2_7_9_10_11 | 33.9507 | -303.551 | 0.2561661 | 0 | 0.098265972 | 0 | -0.04382018  |
| cov1_2_8_9_10_11 | 33.9508 | -303.551 | 0.2561722 | 0 | 0.098332433 | 0 | -0.043826871 |
| cov1_3_4_6_7_8   | 33.9647 | -303.558 | 0.2653916 | 0 | 0.10613122  | 0 | 0            |
| cov1_3_4_7_8_9   | 33.965  | -303.558 | 0.2653901 | 0 | 0.10782796  | 0 | 0            |
| cov1_3_4_6_7_9   | 33.9657 | -303.558 | 0.2654151 | 0 | 0.10597692  | 0 | 0            |
| cov1_3_6_7_8_9   | 33.9699 | -303.561 | 0.2654895 | 0 | 0.10303004  | 0 | 0            |
| cov2_4_7_9_10_11 | 33.9736 | -303.562 | 0.2569587 | 0 | 0           | 0 | -0.052345533 |
| cov2_4_8_9_10_11 | 33.9742 | -303.563 | 0.2569662 | 0 | 0           | 0 | -0.05234969  |
| cov1_3_4_6_8_9   | 33.9819 | -303.567 | 0.2653786 | 0 | 0.10488003  | 0 | 0            |
| cov2_3_4_7_9_11  | 34.0076 | -303.579 | 0.2598502 | 0 | 0           | 0 | -0.020398024 |
| cov2_3_4_8_9_11  | 34.0107 | -303.581 | 0.2598216 | 0 | 0           | 0 | -0.020531786 |
| cov1_2_4_8_10_11 | 34.0221 | -303.587 | 0.2565858 | 0 | 0.073184168 | 0 | -0.083166593 |
| cov1_2_4_7_10_11 | 34.0224 | -303.587 | 0.2565811 | 0 | 0.073154411 | 0 | -0.083153532 |
| cov1_2_4_8_9_11  | 34.0268 | -303.589 | 0.2573111 | 0 | 0.078642444 | 0 | -0.078451417 |
| cov1_2_4_7_9_11  | 34.0273 | -303.589 | 0.257306  | 0 | 0.078613004 | 0 | -0.078438711 |
| cov1_2_4_6_8_11  | 34.0326 | -303.592 | 0.2568211 | 0 | 0.082936905 | 0 | -0.080434108 |
| cov1_2_4_6_7_11  | 34.0335 | -303.592 | 0.2568239 | 0 | 0.082739004 | 0 | -0.080421376 |
| cov1_2_4_7_8_11  | 34.0411 | -303.596 | 0.256963  | 0 | 0.0760174   | 0 | -0.080561761 |
| cov1_2_4_6_10_11 | 34.0722 | -303.612 | 0.2564967 | 0 | 0.084912535 | 0 | -0.084951708 |
| cov3_4_7_8_9_11  | 34.0743 | -303.613 | 0.2605246 | 0 | 0           | 0 | 0            |
| cov1_2_4_6_9_11  | 34.0987 | -303.625 | 0.2572991 | 0 | 0.087690235 | 0 | -0.080282246 |
| cov1_2_6_9_10_11 | 34.1109 | -303.631 | 0.2562258 | 0 | 0.10528712  | 0 | -0.043767833 |
| cov3_4_6_8_9_10  | 34.1203 | -303.636 | 0.2676088 | 0 | 0           | 0 | 0            |
| cov3_4_6_7_9_10  | 34.1231 | -303.637 | 0.2676288 | 0 | 0           | 0 | 0            |
| cov2_3_4_7_8_11  | 34.1284 | -303.64  | 0.2606356 | 0 | 0           | 0 | -0.0134838   |
| cov2_3_7_8_10_11 | 34.1555 | -303.653 | 0.2594452 | 0 | 0           | 0 | 0.011903501  |
| cov1_4_7_9_10_11 | 34.1598 | -303.655 | 0.2586292 | 0 | 0.04307653  | 0 | 0            |
| cov1_4_8_9_10_11 | 34.1598 | -303.655 | 0.2586346 | 0 | 0.043117338 | 0 | 0            |
| cov1_2_3_4_6_10  | 34.165  | -303.658 | 0.2621139 | 0 | 0.11593683  | 0 | -0.060146381 |
| cov1_2_3_4_6_9   | 34.1812 | -303.666 | 0.2628506 | 0 | 0.11793406  | 0 | -0.056088387 |
| cov1_4_6_9_10_11 | 34.2709 | -303.711 | 0.2586851 | 0 | 0.051584297 | 0 | 0            |
| cov2_3_6_8_9_10  | 34.2985 | -303.725 | 0.2675427 | 0 | 0           | 0 | 0.008282317  |
| cov2_3_6_7_9_10  | 34.3039 | -303.728 | 0.2675653 | 0 | 0           | 0 | 0.008591876  |
| cov3_6_7_8_9_10  | 34.3183 | -303.735 | 0.2673484 | 0 | 0           | 0 | 0            |
| cov2_3_7_8_9_11  | 34.353  | -303.752 | 0.259915  | 0 | 0           | 0 | 0.014707477  |

|                  |         |          |           |   |             |   |              |
|------------------|---------|----------|-----------|---|-------------|---|--------------|
| cov1_6_7_9_10_11 | 34.3569 | -303.754 | 0.2576011 | 0 | 0.065334477 | 0 | 0            |
| cov1_6_8_9_10_11 | 34.3569 | -303.754 | 0.2576003 | 0 | 0.065681003 | 0 | 0            |
| cov1_7_8_9_10_11 | 34.3574 | -303.754 | 0.2576582 | 0 | 0.06332432  | 0 | 0            |
| cov4_6_7_9_10_11 | 34.3618 | -303.756 | 0.2588134 | 0 | 0           | 0 | 0            |
| cov4_6_8_9_10_11 | 34.3639 | -303.758 | 0.2588172 | 0 | 0           | 0 | 0            |
| cov4_7_8_9_10_11 | 34.4743 | -303.813 | 0.258089  | 0 | 0           | 0 | 0            |
| cov2_4_6_7_10_11 | 34.5427 | -303.847 | 0.2571939 | 0 | 0           | 0 | -0.063440712 |
| cov2_4_6_8_10_11 | 34.5454 | -303.848 | 0.2571992 | 0 | 0           | 0 | -0.063411177 |
| cov2_3_4_6_9_10  | 34.5585 | -303.855 | 0.2657135 | 0 | 0           | 0 | -0.02703574  |
| cov2_4_6_7_9_11  | 34.5864 | -303.869 | 0.2579989 | 0 | 0           | 0 | -0.058156447 |
| cov2_4_6_7_8_11  | 34.5871 | -303.869 | 0.2578648 | 0 | 0           | 0 | -0.058999691 |
| cov2_4_6_8_9_11  | 34.5893 | -303.87  | 0.2580042 | 0 | 0           | 0 | -0.058124361 |
| cov1_2_6_8_9_10  | 34.6869 | -303.919 | 0.2597379 | 0 | 0.12883623  | 0 | -0.039637596 |
| cov1_2_6_7_9_10  | 34.6872 | -303.919 | 0.2597376 | 0 | 0.12871246  | 0 | -0.039638315 |
| cov1_2_7_8_9_10  | 34.6922 | -303.922 | 0.2596379 | 0 | 0.13461495  | 0 | -0.039448891 |
| cov2_6_7_9_10_11 | 34.7452 | -303.948 | 0.2570026 | 0 | 0           | 0 | -0.014755711 |
| cov2_6_8_9_10_11 | 34.7525 | -303.952 | 0.2570064 | 0 | 0           | 0 | -0.014589212 |
| cov1_2_4_7_8_9   | 34.7633 | -303.957 | 0.2607436 | 0 | 0.1155359   | 0 | -0.072911302 |
| cov1_2_4_6_8_9   | 34.7639 | -303.958 | 0.2607593 | 0 | 0.11444104  | 0 | -0.072864027 |
| cov1_2_4_6_7_9   | 34.7642 | -303.958 | 0.2607577 | 0 | 0.11441644  | 0 | -0.072881775 |
| cov2_4_7_8_10_11 | 34.7731 | -303.962 | 0.2563517 | 0 | 0           | 0 | -0.053188375 |
| cov1_2_4_7_8_10  | 34.7749 | -303.963 | 0.2600619 | 0 | 0.110582    | 0 | -0.077381186 |
| cov1_2_4_6_8_10  | 34.775  | -303.963 | 0.2600238 | 0 | 0.11246871  | 0 | -0.077367715 |
| cov1_2_4_6_7_10  | 34.7751 | -303.963 | 0.2600224 | 0 | 0.11246743  | 0 | -0.077388585 |
| cov1_2_7_8_9_11  | 34.7787 | -303.965 | 0.2562358 | 0 | 0.095131574 | 0 | -0.04049418  |
| cov1_2_6_7_9_11  | 34.779  | -303.965 | 0.256232  | 0 | 0.095116349 | 0 | -0.040490314 |
| cov1_2_6_8_9_11  | 34.779  | -303.965 | 0.2562321 | 0 | 0.095464481 | 0 | -0.040489225 |
| cov1_2_4_6_7_8   | 34.7851 | -303.968 | 0.2603143 | 0 | 0.11346382  | 0 | -0.075473152 |
| cov6_7_8_9_10_11 | 34.8026 | -303.977 | 0.2575149 | 0 | 0           | 0 | 0            |
| cov1_4_6_8_9_10  | 34.8195 | -303.985 | 0.2618584 | 0 | 0.079384599 | 0 | 0            |
| cov1_4_7_8_9_10  | 34.8195 | -303.985 | 0.2618397 | 0 | 0.080469299 | 0 | 0            |
| cov1_4_6_7_9_10  | 34.8199 | -303.986 | 0.2618575 | 0 | 0.079299446 | 0 | 0            |
| cov2_4_7_8_9_11  | 34.8874 | -304.019 | 0.2569843 | 0 | 0           | 0 | -0.046453673 |
| cov2_3_4_6_8_10  | 34.9062 | -304.029 | 0.2661986 | 0 | 0           | 0 | -0.018244364 |
| cov2_3_4_6_7_10  | 34.9095 | -304.03  | 0.2662173 | 0 | 0           | 0 | -0.018055942 |
| cov1_2_6_7_10_11 | 34.9272 | -304.039 | 0.2553612 | 0 | 0.093482738 | 0 | -0.041012959 |
| cov1_2_6_8_10_11 | 34.9273 | -304.039 | 0.2553582 | 0 | 0.093821501 | 0 | -0.041012207 |
| cov1_2_7_8_10_11 | 34.9282 | -304.04  | 0.2554218 | 0 | 0.09098755  | 0 | -0.041086524 |
| cov1_4_6_8_9_11  | 34.9527 | -304.052 | 0.2583824 | 0 | 0.04817228  | 0 | 0            |
| cov1_4_6_7_9_11  | 34.9532 | -304.052 | 0.2583814 | 0 | 0.047899024 | 0 | 0            |
| cov1_4_7_8_9_11  | 34.9558 | -304.054 | 0.2584916 | 0 | 0.044023263 | 0 | 0            |
| cov3_4_6_7_8_10  | 34.9574 | -304.054 | 0.2664923 | 0 | 0           | 0 | 0            |
| cov1_2_6_7_8_11  | 34.9643 | -304.058 | 0.2547024 | 0 | 0.092685124 | 0 | -0.04172795  |
| cov1_6_7_8_9_10  | 35.0204 | -304.086 | 0.2609087 | 0 | 0.097003468 | 0 | 0            |
| cov2_3_4_6_8_9   | 35.043  | -304.097 | 0.2667705 | 0 | 0           | 0 | -0.014525904 |
| cov2_3_4_6_7_9   | 35.0466 | -304.099 | 0.2667854 | 0 | 0           | 0 | -0.014364594 |
| cov1_4_6_8_10_11 | 35.0506 | -304.101 | 0.2577092 | 0 | 0.043669434 | 0 | 0            |



|                    |         |          |           |   |              |   |              |
|--------------------|---------|----------|-----------|---|--------------|---|--------------|
| cov1_4_6_7_10_11   | 35.051  | -304.101 | 0.2577085 | 0 | 0.043411586  | 0 | 0            |
| cov1_4_6_7_8_11    | 35.0577 | -304.104 | 0.2574965 | 0 | 0.042078551  | 0 | 0            |
| cov1_4_7_8_10_11   | 35.0594 | -304.105 | 0.2578893 | 0 | 0.03678008   | 0 | 0            |
| cov2_3_4_6_7_8     | 35.061  | -304.106 | 0.2671341 | 0 | 0            | 0 | -0.012616157 |
| cov3_4_6_7_8_9     | 35.0756 | -304.113 | 0.267001  | 0 | 0            | 0 | 0            |
| cov1_6_7_8_9_11    | 35.1265 | -304.139 | 0.2575375 | 0 | 0.064377777  | 0 | 0            |
| cov2_4_6_7_9_10    | 35.128  | -304.14  | 0.2636801 | 0 | 0            | 0 | -0.04438599  |
| cov2_4_6_8_9_10    | 35.1286 | -304.14  | 0.2636762 | 0 | 0            | 0 | -0.044413176 |
| cov2_3_6_7_8_10    | 35.1524 | -304.152 | 0.2663999 | 0 | 0            | 0 | 0.008766632  |
| cov4_6_7_8_9_11    | 35.1602 | -304.156 | 0.258698  | 0 | 0            | 0 | 0            |
| cov4_6_7_8_10_11   | 35.2214 | -304.186 | 0.2579987 | 0 | 0            | 0 | 0            |
| cov2_3_6_7_8_9     | 35.2399 | -304.196 | 0.2669658 | 0 | 0            | 0 | 0.009577912  |
| cov1_6_7_8_10_11   | 35.2835 | -304.217 | 0.2567192 | 0 | 0.062362144  | 0 | 0            |
| cov2_7_8_9_10_11   | 35.3643 | -304.258 | 0.2555719 | 0 | 0            | 0 | 0.010388187  |
| cov1_2_6_7_8_9     | 35.458  | -304.305 | 0.2596645 | 0 | 0.12417097   | 0 | -0.036599583 |
| cov4_6_7_8_9_10    | 35.4727 | -304.312 | 0.2636924 | 0 | 0            | 0 | 0            |
| cov2_6_7_8_9_11    | 35.513  | -304.332 | 0.2570231 | 0 | 0            | 0 | -0.012744925 |
| cov1_4_6_7_8_9     | 35.5687 | -304.36  | 0.2616082 | 0 | 0.078491543  | 0 | 0            |
| cov1_2_6_7_8_10    | 35.617  | -304.384 | 0.2588225 | 0 | 0.12272369   | 0 | -0.037045126 |
| cov2_6_7_8_10_11   | 35.6369 | -304.394 | 0.2561569 | 0 | 0            | 0 | -0.013725934 |
| cov1_4_6_7_8_10    | 35.677  | -304.414 | 0.2609651 | 0 | 0.074325053  | 0 | 0            |
| cov2_3_4_7_9_10    | 35.7331 | -304.442 | 0.2672467 | 0 | 0            | 0 | 0.018843544  |
| cov2_3_4_8_9_10    | 35.7423 | -304.447 | 0.2672009 | 0 | 0            | 0 | 0.018662123  |
| cov3_4_7_8_9_10    | 35.796  | -304.474 | 0.2668621 | 0 | 0            | 0 | 0            |
| cov2_4_6_7_8_10    | 35.9017 | -304.526 | 0.2626904 | 0 | 0            | 0 | -0.044475612 |
| cov2_4_6_7_8_9     | 35.9274 | -304.539 | 0.2634341 | 0 | 0            | 0 | -0.039644873 |
| cov2_6_7_8_9_10    | 36.1708 | -304.661 | 0.2625069 | 0 | 0            | 0 | 0.004039099  |
| cov2_3_4_7_8_10    | 36.3301 | -304.741 | 0.2662976 | 0 | 0            | 0 | 0.015752923  |
| cov2_3_7_8_9_10    | 36.4153 | -304.783 | 0.2678743 | 0 | 0            | 0 | 0.071249712  |
| cov2_4_7_8_9_10    | 36.5121 | -304.832 | 0.2639852 | 0 | 0            | 0 | -0.007533202 |
| cov2_3_4_7_8_9     | 36.605  | -304.878 | 0.2666748 | 0 | 0            | 0 | 0.020597711  |
| cov1_3_4_5_9_10_11 | 37.7339 | -301.928 | 0.2548686 | 0 | -0.051746128 | 0 | 0            |
| cov2_3_4_5_9_10_11 | 37.7352 | -301.929 | 0.2556149 | 0 | 0            | 0 | -0.036835432 |
| cov2_3_5_7_9_10_11 | 37.8338 | -301.978 | 0.2566802 | 0 | 0            | 0 | -0.049770758 |
| cov2_3_5_8_9_10_11 | 37.8352 | -301.979 | 0.2566592 | 0 | 0            | 0 | -0.049863923 |
| cov2_3_5_6_9_10_11 | 37.8419 | -301.982 | 0.2556626 | 0 | 0            | 0 | -0.050311474 |
| cov3_4_5_6_9_10_11 | 37.8496 | -301.986 | 0.2555368 | 0 | 0            | 0 | 0            |
| cov1_2_3_5_9_10_11 | 37.855  | -301.989 | 0.2558876 | 0 | -0.012663854 | 0 | -0.049725371 |
| cov3_4_5_7_9_10_11 | 37.8698 | -301.996 | 0.2574733 | 0 | 0            | 0 | 0            |
| cov3_4_5_8_9_10_11 | 37.8728 | -301.997 | 0.2574497 | 0 | 0            | 0 | 0            |
| cov1_4_5_7_9_10_11 | 38.0857 | -302.104 | 0.2518348 | 0 | -0.087035772 | 0 | 0            |
| cov1_4_5_8_9_10_11 | 38.0875 | -302.105 | 0.2518518 | 0 | -0.08689012  | 0 | 0            |
| cov1_2_5_7_9_10_11 | 38.1587 | -302.14  | 0.2533458 | 0 | -0.039596029 | 0 | -0.051904962 |
| cov1_2_5_8_9_10_11 | 38.1591 | -302.141 | 0.2533377 | 0 | -0.039549904 | 0 | -0.051896457 |
| cov2_5_6_8_9_10_11 | 38.1949 | -302.158 | 0.2532016 | 0 | 0            | 0 | -0.057172126 |
| cov2_5_6_7_9_10_11 | 38.1968 | -302.159 | 0.2532028 | 0 | 0            | 0 | -0.057228119 |
| cov2_4_5_7_9_10_11 | 38.2307 | -302.176 | 0.2534855 | 0 | 0            | 0 | -0.053461539 |

|                    |         |          |           |   |              |   |              |
|--------------------|---------|----------|-----------|---|--------------|---|--------------|
| cov2_4_5_8_9_10_11 | 38.2308 | -302.176 | 0.2534937 | 0 | 0            | 0 | -0.053464635 |
| cov2_5_7_8_9_10_11 | 38.2742 | -302.198 | 0.2539614 | 0 | 0            | 0 | -0.061731919 |
| cov1_2_4_5_9_10_11 | 38.3109 | -302.217 | 0.2525246 | 0 | -0.045089816 | 0 | -0.036105935 |
| cov1_3_5_7_9_10_11 | 38.3408 | -302.231 | 0.258644  | 0 | -0.035157453 | 0 | 0            |
| cov1_3_5_8_9_10_11 | 38.3425 | -302.232 | 0.2586082 | 0 | -0.035607241 | 0 | 0            |
| cov3_5_6_7_9_10_11 | 38.3544 | -302.238 | 0.2589906 | 0 | 0            | 0 | 0            |
| cov1_3_5_6_9_10_11 | 38.3581 | -302.24  | 0.2574744 | 0 | -0.037801094 | 0 | 0            |
| cov3_5_6_8_9_10_11 | 38.3592 | -302.241 | 0.2589643 | 0 | 0            | 0 | 0            |
| cov2_4_5_6_9_10_11 | 38.3619 | -302.242 | 0.2527466 | 0 | 0            | 0 | -0.04749432  |
| cov1_2_5_6_9_10_11 | 38.3693 | -302.246 | 0.2531862 | 0 | -0.021857669 | 0 | -0.051544282 |
| cov3_5_7_8_9_10_11 | 38.4196 | -302.271 | 0.2601566 | 0 | 0            | 0 | 0            |
| cov1_4_5_6_9_10_11 | 38.4611 | -302.292 | 0.2522269 | 0 | -0.065876501 | 0 | 0            |
| cov4_5_6_8_9_10_11 | 38.4657 | -302.294 | 0.2529696 | 0 | 0            | 0 | 0            |
| cov4_5_6_7_9_10_11 | 38.4694 | -302.296 | 0.2529732 | 0 | 0            | 0 | 0            |
| cov2_3_4_5_7_9_10  | 38.5281 | -302.325 | 0.2588015 | 0 | 0            | 0 | -0.014047342 |
| cov2_3_4_5_8_9_10  | 38.5305 | -302.326 | 0.2587755 | 0 | 0            | 0 | -0.014172114 |
| cov3_4_5_7_8_9_10  | 38.5612 | -302.342 | 0.259275  | 0 | 0            | 0 | 0            |
| cov1_3_4_5_7_9_10  | 38.5617 | -302.342 | 0.2591773 | 0 | -0.002227852 | 0 | 0            |
| cov3_4_5_6_7_9_10  | 38.5618 | -302.342 | 0.2592169 | 0 | 0            | 0 | 0            |
| cov1_3_4_5_8_9_10  | 38.5645 | -302.343 | 0.2591324 | 0 | -0.002740482 | 0 | 0            |
| cov3_4_5_6_8_9_10  | 38.5649 | -302.343 | 0.2591945 | 0 | 0            | 0 | 0            |
| cov1_2_3_4_5_9_10  | 38.5793 | -302.351 | 0.2581038 | 0 | -0.002125307 | 0 | -0.017303984 |
| cov2_3_4_5_6_9_10  | 38.5796 | -302.351 | 0.2581247 | 0 | 0            | 0 | -0.017990491 |
| cov1_3_4_5_6_9_10  | 38.6159 | -302.369 | 0.2581471 | 0 | -0.015750374 | 0 | 0            |
| cov1_2_3_4_5_10_11 | 38.6331 | -302.378 | 0.2539023 | 0 | -0.043015849 | 0 | -0.021782361 |
| cov2_3_4_5_6_10_11 | 38.6723 | -302.397 | 0.2541053 | 0 | 0            | 0 | -0.032022415 |
| cov1_3_4_5_6_10_11 | 38.6755 | -302.399 | 0.2537606 | 0 | -0.050674061 | 0 | 0            |
| cov1_3_4_5_7_10_11 | 38.6895 | -302.406 | 0.2541744 | 0 | -0.056881142 | 0 | 0            |
| cov1_3_4_5_8_10_11 | 38.6896 | -302.406 | 0.2541611 | 0 | -0.057042361 | 0 | 0            |
| cov1_2_3_5_7_9_10  | 38.7043 | -302.413 | 0.2606083 | 0 | 0.038503322  | 0 | -0.044226398 |
| cov2_3_4_5_7_10_11 | 38.7063 | -302.414 | 0.2555596 | 0 | 0            | 0 | -0.034359657 |
| cov1_5_6_8_9_10_11 | 38.7077 | -302.415 | 0.2548914 | 0 | -0.066178909 | 0 | 0            |
| cov2_3_4_5_8_10_11 | 38.7078 | -302.415 | 0.2555395 | 0 | 0            | 0 | -0.034460487 |
| cov1_5_6_7_9_10_11 | 38.7084 | -302.415 | 0.2548919 | 0 | -0.066546446 | 0 | 0            |
| cov1_2_3_5_8_9_10  | 38.709  | -302.416 | 0.2605577 | 0 | 0.037890842  | 0 | -0.044249549 |
| cov1_5_7_8_9_10_11 | 38.7287 | -302.425 | 0.255222  | 0 | -0.076469137 | 0 | 0            |
| cov4_5_7_8_9_10_11 | 38.7547 | -302.438 | 0.254814  | 0 | 0            | 0 | 0            |
| cov2_3_5_6_7_9_10  | 38.7823 | -302.452 | 0.2600803 | 0 | 0            | 0 | -0.038054775 |
| cov2_3_5_6_8_9_10  | 38.7842 | -302.453 | 0.2600603 | 0 | 0            | 0 | -0.038168086 |
| cov2_3_5_6_7_10_11 | 38.7846 | -302.453 | 0.2553398 | 0 | 0            | 0 | -0.047176733 |
| cov2_3_5_6_8_10_11 | 38.7861 | -302.454 | 0.2553165 | 0 | 0            | 0 | -0.047285565 |
| cov3_4_5_6_7_10_11 | 38.7866 | -302.454 | 0.2554158 | 0 | 0            | 0 | 0            |
| cov3_4_5_6_8_10_11 | 38.7898 | -302.456 | 0.2553889 | 0 | 0            | 0 | 0            |
| cov1_2_3_5_6_10_11 | 38.7962 | -302.459 | 0.2547231 | 0 | -0.012143344 | 0 | -0.046941511 |
| cov2_3_5_7_8_9_10  | 38.7989 | -302.461 | 0.2597016 | 0 | 0            | 0 | -0.036040498 |
| cov1_2_3_5_6_9_10  | 38.8033 | -302.463 | 0.2593124 | 0 | 0.02287764   | 0 | -0.04516949  |
| cov1_2_3_5_7_10_11 | 38.8051 | -302.464 | 0.2555511 | 0 | -0.015309413 | 0 | -0.046729167 |

|                    |         |          |           |   |              |   |              |
|--------------------|---------|----------|-----------|---|--------------|---|--------------|
| cov1_2_3_5_8_10_11 | 38.8059 | -302.464 | 0.2555295 | 0 | -0.015607391 | 0 | -0.04674503  |
| cov2_3_5_7_8_10_11 | 38.8183 | -302.47  | 0.2560316 | 0 | 0            | 0 | -0.049393391 |
| cov1_2_3_7_9_10_11 | 38.8484 | -302.485 | 0.2610513 | 0 | 0.10067499   | 0 | -0.042319256 |
| cov1_2_4_5_8_9_10  | 38.8484 | -302.485 | 0.2558831 | 0 | -0.022505424 | 0 | -0.022242052 |
| cov1_2_4_5_7_9_10  | 38.849  | -302.486 | 0.255878  | 0 | -0.022540296 | 0 | -0.022215585 |
| cov1_2_3_8_9_10_11 | 38.8609 | -302.492 | 0.2609926 | 0 | 0.10039669   | 0 | -0.042314049 |
| cov2_4_5_6_8_9_10  | 38.8705 | -302.496 | 0.2559958 | 0 | 0            | 0 | -0.02966622  |
| cov2_4_5_6_7_9_10  | 38.8717 | -302.497 | 0.255996  | 0 | 0            | 0 | -0.029731681 |
| cov2_4_5_7_8_9_10  | 38.882  | -302.502 | 0.2561774 | 0 | 0            | 0 | -0.032885988 |
| cov3_4_5_7_8_10_11 | 38.8953 | -302.509 | 0.2568696 | 0 | 0            | 0 | 0            |
| cov1_4_5_6_8_9_10  | 38.9087 | -302.515 | 0.2557415 | 0 | -0.040937515 | 0 | 0            |
| cov1_4_5_7_8_9_10  | 38.9088 | -302.515 | 0.2557542 | 0 | -0.041903252 | 0 | 0            |
| cov1_4_5_6_7_9_10  | 38.9092 | -302.516 | 0.2557372 | 0 | -0.041217667 | 0 | 0            |
| cov1_2_4_5_7_10_11 | 38.9129 | -302.517 | 0.2511802 | 0 | -0.072266588 | 0 | -0.025240736 |
| cov1_2_4_5_8_10_11 | 38.9145 | -302.518 | 0.2511963 | 0 | -0.072057992 | 0 | -0.025330707 |
| cov1_2_4_5_6_9_10  | 38.9547 | -302.538 | 0.2558105 | 0 | -0.013324108 | 0 | -0.027764268 |
| cov1_4_5_6_7_10_11 | 38.9744 | -302.548 | 0.2508575 | 0 | -0.08432769  | 0 | 0            |
| cov1_4_5_6_8_10_11 | 38.9751 | -302.549 | 0.2508635 | 0 | -0.083794124 | 0 | 0            |
| cov5_6_7_8_9_10_11 | 38.9813 | -302.552 | 0.2556131 | 0 | 0            | 0 | 0            |
| cov1_4_5_7_8_10_11 | 38.9906 | -302.556 | 0.251086  | 0 | -0.093291973 | 0 | 0            |
| cov1_2_3_4_5_9_11  | 38.9909 | -302.556 | 0.2552103 | 0 | -0.025059951 | 0 | -0.021223256 |
| cov2_3_4_5_6_9_11  | 39.002  | -302.562 | 0.2552965 | 0 | 0            | 0 | -0.027061567 |
| cov2_3_4_5_7_9_11  | 39.0138 | -302.568 | 0.2562001 | 0 | 0            | 0 | -0.028411332 |
| cov2_3_4_5_8_9_11  | 39.0147 | -302.568 | 0.2561792 | 0 | 0            | 0 | -0.028503893 |
| cov1_2_5_6_8_9_10  | 39.0237 | -302.573 | 0.2572856 | 0 | 0.00495675   | 0 | -0.046935607 |
| cov4_5_6_7_8_9_10  | 39.0243 | -302.573 | 0.2559771 | 0 | 0            | 0 | 0            |
| cov1_2_5_6_7_9_10  | 39.0245 | -302.573 | 0.257286  | 0 | 0.004808004  | 0 | -0.046935113 |
| cov1_2_5_7_8_9_10  | 39.0246 | -302.573 | 0.2573362 | 0 | 0.002643608  | 0 | -0.047013787 |
| cov2_5_6_7_8_9_10  | 39.025  | -302.574 | 0.2573146 | 0 | 0            | 0 | -0.045899552 |
| cov1_3_4_5_6_9_11  | 39.0394 | -302.581 | 0.2551306 | 0 | -0.035534473 | 0 | 0            |
| cov1_3_4_5_7_9_11  | 39.045  | -302.584 | 0.2554047 | 0 | -0.039402747 | 0 | 0            |
| cov1_3_4_5_8_9_11  | 39.0452 | -302.584 | 0.255392  | 0 | -0.039588216 | 0 | 0            |
| cov1_2_5_6_8_10_11 | 39.0561 | -302.589 | 0.2523019 | 0 | -0.03738527  | 0 | -0.049074764 |
| cov1_2_5_6_7_10_11 | 39.0568 | -302.589 | 0.2523016 | 0 | -0.037753775 | 0 | -0.049075104 |
| cov2_4_5_6_8_10_11 | 39.0727 | -302.597 | 0.2517631 | 0 | 0            | 0 | -0.045024134 |
| cov2_4_5_6_7_10_11 | 39.0751 | -302.599 | 0.2517656 | 0 | 0            | 0 | -0.045113099 |
| cov1_2_5_7_8_10_11 | 39.0793 | -302.601 | 0.2526177 | 0 | -0.048047433 | 0 | -0.049336068 |
| cov3_4_5_6_7_9_11  | 39.0943 | -302.608 | 0.256274  | 0 | 0            | 0 | 0            |
| cov3_4_5_6_8_9_11  | 39.0962 | -302.609 | 0.2562513 | 0 | 0            | 0 | 0            |
| cov1_3_5_6_7_9_10  | 39.1148 | -302.618 | 0.2622272 | 0 | 0.011195102  | 0 | 0            |
| cov1_3_5_7_8_9_10  | 39.116  | -302.619 | 0.2623151 | 0 | 0.007779806  | 0 | 0            |
| cov1_3_5_6_8_9_10  | 39.1204 | -302.621 | 0.2621804 | 0 | 0.010131627  | 0 | 0            |
| cov3_5_6_7_8_9_10  | 39.1205 | -302.621 | 0.262008  | 0 | 0            | 0 | 0            |
| cov2_5_6_7_8_10_11 | 39.1332 | -302.628 | 0.2524446 | 0 | 0            | 0 | -0.055702418 |
| cov2_3_5_6_7_9_11  | 39.1349 | -302.628 | 0.2563416 | 0 | 0            | 0 | -0.043476762 |
| cov2_3_5_6_8_9_11  | 39.1357 | -302.629 | 0.2563253 | 0 | 0            | 0 | -0.043559805 |
| cov1_2_3_5_6_9_11  | 39.142  | -302.632 | 0.2560292 | 0 | 0.001166426  | 0 | -0.04482296  |

|                    |         |          |           |   |              |   |              |
|--------------------|---------|----------|-----------|---|--------------|---|--------------|
| cov2_3_5_7_8_9_11  | 39.1423 | -302.632 | 0.2566878 | 0 | 0            | 0 | -0.044557583 |
| cov1_2_3_5_7_9_11  | 39.1428 | -302.632 | 0.2566908 | 0 | 0.00024807   | 0 | -0.044604029 |
| cov3_4_5_7_8_9_11  | 39.1429 | -302.633 | 0.2572711 | 0 | 0            | 0 | 0            |
| cov1_2_3_5_8_9_11  | 39.1436 | -302.633 | 0.2566641 | 0 | -8.49E-05    | 0 | -0.044623786 |
| cov1_2_3_4_9_10_11 | 39.1573 | -302.64  | 0.2592433 | 0 | 0.082988306  | 0 | -0.066117863 |
| cov2_3_4_5_7_8_11  | 39.1728 | -302.647 | 0.2572324 | 0 | 0            | 0 | -0.020382864 |
| cov1_2_3_4_5_7_11  | 39.1734 | -302.648 | 0.2572933 | 0 | 0.002383942  | 0 | -0.02126113  |
| cov1_2_3_4_5_8_11  | 39.1736 | -302.648 | 0.2572679 | 0 | 0.002050723  | 0 | -0.021235778 |
| cov2_3_4_5_6_7_11  | 39.1737 | -302.648 | 0.257214  | 0 | 0            | 0 | -0.020260644 |
| cov2_3_4_5_6_8_11  | 39.1738 | -302.648 | 0.2572037 | 0 | 0            | 0 | -0.020333334 |
| cov1_2_3_4_5_6_11  | 39.1741 | -302.648 | 0.2571171 | 0 | 0.001471682  | 0 | -0.021131876 |
| cov1_2_4_5_6_10_11 | 39.2083 | -302.665 | 0.2515508 | 0 | -0.04338472  | 0 | -0.033650292 |
| cov1_3_4_7_9_10_11 | 39.218  | -302.67  | 0.2624802 | 0 | 0.071838692  | 0 | 0            |
| cov2_4_5_7_8_10_11 | 39.2204 | -302.671 | 0.2529358 | 0 | 0            | 0 | -0.054365566 |
| cov1_3_6_7_9_10_11 | 39.2215 | -302.672 | 0.2624434 | 0 | 0.072882907  | 0 | 0            |
| cov1_3_7_8_9_10_11 | 39.227  | -302.675 | 0.2626012 | 0 | 0.066983426  | 0 | 0            |
| cov1_3_4_5_7_8_11  | 39.2273 | -302.675 | 0.2572999 | 0 | -0.014426232 | 0 | 0            |
| cov1_3_4_5_6_7_11  | 39.2279 | -302.675 | 0.257278  | 0 | -0.013389912 | 0 | 0            |
| cov1_3_4_5_6_8_11  | 39.2281 | -302.675 | 0.2572557 | 0 | -0.013703025 | 0 | 0            |
| cov1_3_4_8_9_10_11 | 39.2309 | -302.677 | 0.2624219 | 0 | 0.071439954  | 0 | 0            |
| cov1_3_6_8_9_10_11 | 39.2354 | -302.679 | 0.2624056 | 0 | 0.071839338  | 0 | 0            |
| cov3_4_5_6_7_8_11  | 39.2364 | -302.679 | 0.2575499 | 0 | 0            | 0 | 0            |
| cov1_3_5_6_7_10_11 | 39.238  | -302.68  | 0.2571669 | 0 | -0.033721908 | 0 | 0            |
| cov1_3_5_6_8_10_11 | 39.2398 | -302.681 | 0.2571327 | 0 | -0.034373939 | 0 | 0            |
| cov1_2_4_5_7_9_11  | 39.2547 | -302.688 | 0.2524933 | 0 | -0.054595702 | 0 | -0.024542267 |
| cov1_2_4_5_8_9_11  | 39.2557 | -302.689 | 0.2525089 | 0 | -0.054405723 | 0 | -0.024624518 |
| cov1_3_5_7_8_10_11 | 39.2645 | -302.693 | 0.2575368 | 0 | -0.045028652 | 0 | 0            |
| cov3_5_6_7_8_10_11 | 39.2918 | -302.707 | 0.2580204 | 0 | 0            | 0 | 0            |
| cov1_2_3_5_6_7_11  | 39.3014 | -302.712 | 0.258276  | 0 | 0.024569993  | 0 | -0.042579245 |
| cov1_2_3_5_7_8_11  | 39.3018 | -302.712 | 0.2583448 | 0 | 0.021773439  | 0 | -0.042678603 |
| cov1_2_3_5_6_8_11  | 39.3024 | -302.712 | 0.2582511 | 0 | 0.024077813  | 0 | -0.04260324  |
| cov1_4_5_6_7_9_11  | 39.3212 | -302.722 | 0.2522307 | 0 | -0.069319511 | 0 | 0            |
| cov1_4_5_6_8_9_11  | 39.3217 | -302.722 | 0.2522359 | 0 | -0.068787361 | 0 | 0            |
| cov1_4_5_7_8_9_11  | 39.328  | -302.725 | 0.2523876 | 0 | -0.075175578 | 0 | 0            |
| cov2_3_5_6_7_8_11  | 39.3305 | -302.726 | 0.258039  | 0 | 0            | 0 | -0.038738898 |
| cov2_4_5_6_8_9_11  | 39.3514 | -302.737 | 0.2529396 | 0 | 0            | 0 | -0.039808314 |
| cov2_4_5_6_7_9_11  | 39.3535 | -302.738 | 0.2529421 | 0 | 0            | 0 | -0.039901708 |
| cov1_2_3_6_9_10_11 | 39.3869 | -302.754 | 0.2590758 | 0 | 0.094349384  | 0 | -0.042817551 |
| cov1_2_5_6_8_9_11  | 39.3895 | -302.756 | 0.2535947 | 0 | -0.024401489 | 0 | -0.046986722 |
| cov1_2_5_6_7_9_11  | 39.3903 | -302.756 | 0.2535954 | 0 | -0.024774466 | 0 | -0.046988612 |
| cov1_2_5_7_8_9_11  | 39.4009 | -302.762 | 0.2538333 | 0 | -0.031923499 | 0 | -0.047195861 |
| cov4_5_6_7_8_10_11 | 39.4082 | -302.765 | 0.2522386 | 0 | 0            | 0 | 0            |
| cov2_5_6_7_8_9_11  | 39.4223 | -302.772 | 0.2536783 | 0 | 0            | 0 | -0.051375709 |
| cov2_4_5_7_8_9_11  | 39.4297 | -302.776 | 0.2538059 | 0 | 0            | 0 | -0.04667337  |
| cov1_2_4_5_6_8_11  | 39.4302 | -302.776 | 0.2543811 | 0 | -0.027511289 | 0 | -0.024455695 |
| cov1_2_4_5_7_8_11  | 39.4303 | -302.776 | 0.2544079 | 0 | -0.029763638 | 0 | -0.024384673 |
| cov1_2_4_5_6_7_11  | 39.4305 | -302.776 | 0.2543777 | 0 | -0.028030237 | 0 | -0.024387771 |

|                    |         |          |           |   |              |   |              |
|--------------------|---------|----------|-----------|---|--------------|---|--------------|
| cov2_3_4_5_6_7_10  | 39.4379 | -302.78  | 0.2579191 | 0 | 0            | 0 | -0.015783606 |
| cov2_3_4_5_7_8_10  | 39.4381 | -302.78  | 0.2580124 | 0 | 0            | 0 | -0.01646652  |
| cov1_2_3_4_5_7_10  | 39.4387 | -302.78  | 0.2580259 | 0 | 0.000625719  | 0 | -0.016683724 |
| cov2_3_4_5_6_8_10  | 39.4401 | -302.781 | 0.2579009 | 0 | 0            | 0 | -0.015912922 |
| cov1_2_3_4_5_8_10  | 39.4409 | -302.782 | 0.2579862 | 0 | 0.000120127  | 0 | -0.016622459 |
| cov2_4_5_6_7_8_11  | 39.4685 | -302.795 | 0.254425  | 0 | 0            | 0 | -0.034182816 |
| cov1_3_4_5_6_7_10  | 39.4713 | -302.797 | 0.2579637 | 0 | -0.010450486 | 0 | 0            |
| cov1_3_4_5_7_8_10  | 39.472  | -302.797 | 0.2580376 | 0 | -0.013015394 | 0 | 0            |
| cov1_3_4_5_6_8_10  | 39.4735 | -302.798 | 0.2579277 | 0 | -0.011128448 | 0 | 0            |
| cov3_4_5_6_7_8_10  | 39.4761 | -302.799 | 0.2582103 | 0 | 0            | 0 | 0            |
| cov1_2_3_4_5_6_10  | 39.4804 | -302.801 | 0.2570675 | 0 | -0.009941521 | 0 | -0.015493245 |
| cov1_5_6_7_8_9_10  | 39.4908 | -302.806 | 0.2587491 | 0 | -0.029182696 | 0 | 0            |
| cov1_4_5_6_7_8_11  | 39.5022 | -302.812 | 0.254276  | 0 | -0.048561769 | 0 | 0            |
| cov1_3_5_6_7_9_11  | 39.5483 | -302.835 | 0.2582497 | 0 | -0.020481304 | 0 | 0            |
| cov1_3_5_6_8_9_11  | 39.5499 | -302.836 | 0.2582161 | 0 | -0.021108813 | 0 | 0            |
| cov1_2_5_6_7_8_11  | 39.5518 | -302.837 | 0.2554153 | 0 | -0.006959111 | 0 | -0.045146559 |
| cov1_2_4_5_6_9_11  | 39.5608 | -302.841 | 0.2529116 | 0 | -0.028879875 | 0 | -0.032907601 |
| cov1_3_5_7_8_9_11  | 39.5617 | -302.842 | 0.2585258 | 0 | -0.028568545 | 0 | 0            |
| cov1_5_6_7_8_10_11 | 39.566  | -302.844 | 0.2540248 | 0 | -0.07097097  | 0 | 0            |
| cov3_5_6_7_8_9_11  | 39.5671 | -302.845 | 0.2587685 | 0 | 0            | 0 | 0            |
| cov1_2_3_4_7_9_10  | 39.574  | -302.848 | 0.2647682 | 0 | 0.13255335   | 0 | -0.052585771 |
| cov1_2_3_4_8_9_10  | 39.592  | -302.857 | 0.2647121 | 0 | 0.13233798   | 0 | -0.052726893 |
| cov4_5_6_7_8_9_11  | 39.6148 | -302.868 | 0.2533076 | 0 | 0            | 0 | 0            |
| cov1_2_3_5_6_7_10  | 39.6192 | -302.871 | 0.2593766 | 0 | 0.029884096  | 0 | -0.041917172 |
| cov1_2_3_5_7_8_10  | 39.6215 | -302.872 | 0.2594667 | 0 | 0.025862423  | 0 | -0.042045364 |
| cov1_2_3_5_6_8_10  | 39.6232 | -302.873 | 0.2593353 | 0 | 0.029018864  | 0 | -0.041948358 |
| cov1_2_3_7_8_9_10  | 39.662  | -302.892 | 0.2648383 | 0 | 0.13873893   | 0 | -0.037739241 |
| cov2_3_5_6_7_8_10  | 39.6621 | -302.892 | 0.2590232 | 0 | 0            | 0 | -0.037375324 |
| cov1_2_3_6_7_9_10  | 39.6626 | -302.892 | 0.2648682 | 0 | 0.13646681   | 0 | -0.037805588 |
| cov1_2_3_6_8_9_10  | 39.6818 | -302.902 | 0.264827  | 0 | 0.13534608   | 0 | -0.03780941  |
| cov1_3_5_6_7_8_11  | 39.6833 | -302.903 | 0.2597752 | 0 | -0.003385809 | 0 | 0            |
| cov1_2_4_5_6_8_10  | 39.7162 | -302.919 | 0.2549491 | 0 | -0.028730369 | 0 | -0.019978176 |
| cov1_2_4_5_6_7_10  | 39.7168 | -302.919 | 0.2549523 | 0 | -0.029002512 | 0 | -0.019944239 |
| cov1_2_4_5_7_8_10  | 39.7179 | -302.92  | 0.2550044 | 0 | -0.031964591 | 0 | -0.019939363 |
| cov3_4_6_7_9_10_11 | 39.7276 | -302.925 | 0.2623631 | 0 | 0            | 0 | 0            |
| cov3_4_6_8_9_10_11 | 39.7291 | -302.926 | 0.2623478 | 0 | 0            | 0 | 0            |
| cov2_3_6_8_9_10_11 | 39.7403 | -302.931 | 0.2616317 | 0 | 0            | 0 | -0.011610961 |
| cov2_3_6_7_9_10_11 | 39.7415 | -302.932 | 0.2616458 | 0 | 0            | 0 | -0.011390096 |
| cov2_4_5_6_7_8_10  | 39.756  | -302.939 | 0.2551273 | 0 | 0            | 0 | -0.029878272 |
| cov1_2_3_4_5_7_9   | 39.7643 | -302.943 | 0.2591483 | 0 | 0.016454072  | 0 | -0.016204564 |
| cov1_4_5_6_7_8_10  | 39.7649 | -302.943 | 0.2548227 | 0 | -0.046296816 | 0 | 0            |
| cov1_2_3_4_5_8_9   | 39.7666 | -302.944 | 0.2591065 | 0 | 0.015915689  | 0 | -0.016139923 |
| cov1_3_4_6_9_10_11 | 39.7736 | -302.948 | 0.2605805 | 0 | 0.060024474  | 0 | 0            |
| cov2_3_4_5_6_7_9   | 39.7747 | -302.948 | 0.2588571 | 0 | 0            | 0 | -0.011769146 |
| cov3_6_7_8_9_10_11 | 39.7754 | -302.949 | 0.2620982 | 0 | 0            | 0 | 0            |
| cov2_3_4_5_6_8_9   | 39.7761 | -302.949 | 0.2588383 | 0 | 0            | 0 | -0.011882481 |
| cov2_3_4_5_7_8_9   | 39.7777 | -302.95  | 0.2586672 | 0 | 0            | 0 | -0.010325536 |

|                    |         |          |           |   |              |   |              |
|--------------------|---------|----------|-----------|---|--------------|---|--------------|
| cov1_2_3_4_7_10_11 | 39.783  | -302.953 | 0.2601054 | 0 | 0.085378626  | 0 | -0.057187844 |
| cov2_3_4_6_9_10_11 | 39.7868 | -302.954 | 0.2600079 | 0 | 0            | 0 | -0.044629399 |
| cov1_2_3_4_8_10_11 | 39.7925 | -302.957 | 0.2600535 | 0 | 0.085088156  | 0 | -0.057308063 |
| cov1_3_4_5_7_8_9   | 39.7953 | -302.959 | 0.2591269 | 0 | 0.003137995  | 0 | 0            |
| cov3_4_5_6_7_8_9   | 39.7957 | -302.959 | 0.2590654 | 0 | 0            | 0 | 0            |
| cov1_3_4_5_6_7_9   | 39.7962 | -302.959 | 0.2591288 | 0 | 0.002565755  | 0 | 0            |
| cov1_3_4_5_6_8_9   | 39.7982 | -302.96  | 0.259094  | 0 | 0.001908148  | 0 | 0            |
| cov1_2_3_4_5_6_9   | 39.8008 | -302.961 | 0.2583137 | 0 | 0.003654415  | 0 | -0.015088185 |
| cov1_5_6_7_8_9_11  | 39.8576 | -302.99  | 0.2551719 | 0 | -0.057057947 | 0 | 0            |
| cov1_2_5_6_7_8_10  | 39.8895 | -303.006 | 0.2563833 | 0 | -0.002323708 | 0 | -0.044525059 |
| cov1_2_3_6_7_10_11 | 39.9014 | -303.012 | 0.260038  | 0 | 0.099413397  | 0 | -0.039324783 |
| cov1_2_3_7_8_10_11 | 39.9084 | -303.015 | 0.2601914 | 0 | 0.093060852  | 0 | -0.039506503 |
| cov1_2_3_6_8_10_11 | 39.9143 | -303.018 | 0.259995  | 0 | 0.098421267  | 0 | -0.039341981 |
| cov1_2_3_4_5_6_7   | 39.9174 | -303.02  | 0.2608824 | 0 | 0.033533533  | 0 | -0.016128146 |
| cov1_2_3_4_5_6_8   | 39.9196 | -303.021 | 0.2608448 | 0 | 0.032784583  | 0 | -0.016062251 |
| cov1_2_3_4_5_7_8   | 39.92   | -303.021 | 0.2608404 | 0 | 0.038871408  | 0 | -0.016186465 |
| cov1_2_3_4_7_9_11  | 39.9223 | -303.022 | 0.2607105 | 0 | 0.090235567  | 0 | -0.053350073 |
| cov1_2_3_5_7_8_9   | 39.9256 | -303.024 | 0.2604896 | 0 | 0.040180365  | 0 | -0.040099286 |
| cov1_2_3_5_6_7_9   | 39.9266 | -303.024 | 0.260463  | 0 | 0.041050553  | 0 | -0.040057526 |
| cov1_2_3_4_6_7_11  | 39.9303 | -303.026 | 0.2608803 | 0 | 0.096065275  | 0 | -0.052048785 |
| cov1_2_3_5_6_8_9   | 39.9303 | -303.026 | 0.260422  | 0 | 0.040216582  | 0 | -0.04009575  |
| cov1_2_3_4_8_9_11  | 39.931  | -303.027 | 0.2606606 | 0 | 0.089960538  | 0 | -0.0534668   |
| cov1_2_3_4_7_8_11  | 39.9321 | -303.027 | 0.2609645 | 0 | 0.092238999  | 0 | -0.052087453 |
| cov1_2_3_4_6_8_11  | 39.9394 | -303.031 | 0.2608376 | 0 | 0.09524049   | 0 | -0.05219633  |
| cov2_3_4_7_9_10_11 | 39.9407 | -303.031 | 0.2600869 | 0 | 0            | 0 | -0.024196061 |
| cov2_3_4_8_9_10_11 | 39.9449 | -303.033 | 0.260054  | 0 | 0            | 0 | -0.024347083 |
| cov1_3_4_5_6_7_8   | 39.948  | -303.035 | 0.2608524 | 0 | 0.020435114  | 0 | 0            |
| cov1_3_4_7_8_9_10  | 39.9581 | -303.04  | 0.2659773 | 0 | 0.11087429   | 0 | 0            |
| cov1_3_4_6_7_9_10  | 39.9591 | -303.041 | 0.2660007 | 0 | 0.1097532    | 0 | 0            |
| cov1_3_6_7_8_9_10  | 39.9645 | -303.043 | 0.2660832 | 0 | 0.10643752   | 0 | 0            |
| cov2_3_4_5_6_7_8   | 39.9668 | -303.044 | 0.2605258 | 0 | 0            | 0 | -0.005947595 |
| cov1_3_4_6_8_9_10  | 39.9787 | -303.05  | 0.2659608 | 0 | 0.10852086   | 0 | 0            |
| cov1_3_5_6_7_8_10  | 39.9887 | -303.055 | 0.2609605 | 0 | 0.002692137  | 0 | 0            |
| cov2_3_5_6_7_8_9   | 40.0076 | -303.065 | 0.2599731 | 0 | 0            | 0 | -0.033816996 |
| cov1_2_3_6_7_9_11  | 40.009  | -303.066 | 0.2607038 | 0 | 0.10017296   | 0 | -0.038436656 |
| cov1_2_3_7_8_9_11  | 40.0104 | -303.066 | 0.2607933 | 0 | 0.096794777  | 0 | -0.038542386 |
| cov1_2_3_6_7_8_11  | 40.0105 | -303.066 | 0.2608374 | 0 | 0.10068331   | 0 | -0.03832528  |
| cov1_2_3_6_8_9_11  | 40.0199 | -303.071 | 0.2606639 | 0 | 0.099287021  | 0 | -0.038447542 |
| cov1_2_4_5_6_8_9   | 40.0272 | -303.075 | 0.2561958 | 0 | -0.015488113 | 0 | -0.019388763 |
| cov1_2_4_5_7_8_9   | 40.0272 | -303.075 | 0.2561971 | 0 | -0.015597889 | 0 | -0.019383135 |
| cov1_2_4_5_6_7_9   | 40.0279 | -303.075 | 0.256194  | 0 | -0.015763539 | 0 | -0.019361727 |
| cov3_4_7_8_9_10_11 | 40.0346 | -303.078 | 0.260908  | 0 | 0            | 0 | 0            |
| cov2_4_5_6_7_8_9   | 40.0388 | -303.08  | 0.2562848 | 0 | 0            | 0 | -0.024747434 |
| cov1_2_3_5_6_7_8   | 40.058  | -303.09  | 0.2619746 | 0 | 0.056197166  | 0 | -0.038514918 |
| cov1_4_5_6_7_8_9   | 40.0731 | -303.098 | 0.2560664 | 0 | -0.032565167 | 0 | 0            |
| cov1_2_4_8_9_10_11 | 40.0978 | -303.11  | 0.2572651 | 0 | 0.080626443  | 0 | -0.085291577 |
| cov1_2_4_7_9_10_11 | 40.0982 | -303.11  | 0.2572607 | 0 | 0.080603686  | 0 | -0.085280395 |

|                    |         |          |           |   |             |   |              |
|--------------------|---------|----------|-----------|---|-------------|---|--------------|
| cov1_2_4_6_9_10_11 | 40.1565 | -303.139 | 0.2572168 | 0 | 0.090389831 | 0 | -0.087054231 |
| cov1_2_3_4_6_10_11 | 40.1578 | -303.14  | 0.2582452 | 0 | 0.082576221 | 0 | -0.064720367 |
| cov1_2_4_5_6_7_8   | 40.1739 | -303.148 | 0.2579343 | 0 | 0.002067519 | 0 | -0.019279757 |
| cov1_2_5_6_7_8_9   | 40.1821 | -303.152 | 0.257536  | 0 | 0.009443104 | 0 | -0.042644168 |
| cov1_3_4_6_7_10_11 | 40.2271 | -303.175 | 0.2613907 | 0 | 0.071379822 | 0 | 0            |
| cov1_3_6_7_8_10_11 | 40.2281 | -303.175 | 0.2614385 | 0 | 0.069772903 | 0 | 0            |
| cov1_2_3_4_6_9_11  | 40.2284 | -303.175 | 0.2590984 | 0 | 0.085438804 | 0 | -0.060263784 |
| cov1_3_4_7_8_10_11 | 40.2367 | -303.179 | 0.2615712 | 0 | 0.064188181 | 0 | 0            |
| cov1_3_4_6_8_10_11 | 40.2404 | -303.181 | 0.2613502 | 0 | 0.070281955 | 0 | 0            |
| cov1_2_3_4_6_9_10  | 40.2545 | -303.188 | 0.2631053 | 0 | 0.1223926   | 0 | -0.061475501 |
| cov1_3_5_6_7_8_9   | 40.2643 | -303.193 | 0.2619254 | 0 | 0.014800424 | 0 | 0            |
| cov1_3_4_6_7_8_11  | 40.3146 | -303.218 | 0.261996  | 0 | 0.07508228  | 0 | 0            |
| cov1_3_4_6_7_9_11  | 40.3152 | -303.219 | 0.2619497 | 0 | 0.074556956 | 0 | 0            |
| cov1_3_4_7_8_9_11  | 40.3178 | -303.22  | 0.2620609 | 0 | 0.070479303 | 0 | 0            |
| cov1_3_6_7_8_9_11  | 40.321  | -303.222 | 0.2620348 | 0 | 0.071198375 | 0 | 0            |
| cov1_3_4_6_8_9_11  | 40.3267 | -303.224 | 0.2619048 | 0 | 0.073560569 | 0 | 0            |
| cov2_3_7_8_9_10_11 | 40.331  | -303.227 | 0.2601853 | 0 | 0           | 0 | 0.013161569  |
| cov2_3_4_6_8_10_11 | 40.4681 | -303.295 | 0.2604921 | 0 | 0           | 0 | -0.036707833 |
| cov2_3_4_6_7_10_11 | 40.4682 | -303.295 | 0.2605059 | 0 | 0           | 0 | -0.036560962 |
| cov1_2_3_4_7_8_10  | 40.5579 | -303.34  | 0.2637817 | 0 | 0.12328195  | 0 | -0.051512927 |
| cov1_2_3_4_6_7_10  | 40.5585 | -303.34  | 0.2637459 | 0 | 0.12504657  | 0 | -0.051520559 |
| cov1_2_3_4_6_8_10  | 40.5749 | -303.349 | 0.2637066 | 0 | 0.12400549  | 0 | -0.051644326 |
| cov2_3_4_6_8_9_11  | 40.6381 | -303.38  | 0.2611663 | 0 | 0           | 0 | -0.032517052 |
| cov2_3_4_6_7_9_11  | 40.6387 | -303.38  | 0.2611748 | 0 | 0           | 0 | -0.032405802 |
| cov1_2_3_6_7_8_10  | 40.6659 | -303.394 | 0.2638225 | 0 | 0.13023358  | 0 | -0.035149601 |
| cov2_3_4_6_7_8_11  | 40.6666 | -303.394 | 0.2616503 | 0 | 0           | 0 | -0.030029765 |
| cov3_4_6_7_8_10_11 | 40.6705 | -303.396 | 0.2614202 | 0 | 0           | 0 | 0            |
| cov1_2_3_4_7_8_9   | 40.6738 | -303.398 | 0.2643199 | 0 | 0.12750312  | 0 | -0.047893369 |
| cov1_2_3_4_6_7_9   | 40.675  | -303.399 | 0.2643377 | 0 | 0.12609308  | 0 | -0.047859986 |
| cov1_2_3_4_6_7_8   | 40.6785 | -303.4   | 0.264509  | 0 | 0.1268354   | 0 | -0.047026877 |
| cov1_2_3_4_6_8_9   | 40.6895 | -303.406 | 0.2643011 | 0 | 0.12513992  | 0 | -0.047984721 |
| cov2_4_6_7_9_10_11 | 40.6964 | -303.409 | 0.2579783 | 0 | 0           | 0 | -0.06416004  |
| cov2_4_6_8_9_10_11 | 40.6993 | -303.411 | 0.2579848 | 0 | 0           | 0 | -0.064119407 |
| cov2_3_6_7_8_10_11 | 40.7039 | -303.413 | 0.2606976 | 0 | 0           | 0 | -0.010351277 |
| cov1_2_3_6_7_8_9   | 40.7478 | -303.435 | 0.2644124 | 0 | 0.13054657  | 0 | -0.034387004 |
| cov2_3_4_7_8_10_11 | 40.7886 | -303.455 | 0.2593811 | 0 | 0           | 0 | -0.025720735 |
| cov3_4_6_7_8_9_11  | 40.7977 | -303.46  | 0.2619726 | 0 | 0           | 0 | 0            |
| cov2_3_6_7_8_9_11  | 40.8229 | -303.472 | 0.2613538 | 0 | 0           | 0 | -0.009264346 |
| cov1_2_4_7_8_9_10  | 40.9022 | -303.512 | 0.2608696 | 0 | 0.11906427  | 0 | -0.079257114 |
| cov1_2_4_6_7_9_10  | 40.9032 | -303.513 | 0.2608712 | 0 | 0.11868986  | 0 | -0.079235123 |
| cov1_2_4_6_8_9_10  | 40.9032 | -303.513 | 0.2608744 | 0 | 0.11865959  | 0 | -0.079206746 |
| cov1_3_4_6_7_8_10  | 40.9271 | -303.525 | 0.2649221 | 0 | 0.10359745  | 0 | 0            |
| cov1_2_7_8_9_10_11 | 40.9795 | -303.551 | 0.2561672 | 0 | 0.098278628 | 0 | -0.043822762 |
| cov1_2_6_7_9_10_11 | 40.9797 | -303.551 | 0.2561515 | 0 | 0.098809234 | 0 | -0.04380456  |
| cov1_2_6_8_9_10_11 | 40.9798 | -303.551 | 0.2561514 | 0 | 0.099150767 | 0 | -0.043803373 |
| cov1_3_4_6_7_8_9   | 40.9937 | -303.558 | 0.2654167 | 0 | 0.10626471  | 0 | 0            |
| cov2_4_7_8_9_10_11 | 41.0026 | -303.562 | 0.25696   | 0 | 0           | 0 | -0.052345557 |

|                      |         |          |           |   |              |   |              |
|----------------------|---------|----------|-----------|---|--------------|---|--------------|
| cov2_3_4_7_8_9_11    | 41.0365 | -303.579 | 0.2598527 | 0 | 0            | 0 | -0.020397159 |
| cov1_2_4_6_8_10_11   | 41.0379 | -303.58  | 0.2563588 | 0 | 0.081559517  | 0 | -0.083344161 |
| cov1_2_4_6_7_10_11   | 41.0387 | -303.58  | 0.2563592 | 0 | 0.081372717  | 0 | -0.083334502 |
| cov1_2_4_6_8_9_11    | 41.0504 | -303.586 | 0.2571623 | 0 | 0.084010551  | 0 | -0.078550279 |
| cov1_2_4_7_8_10_11   | 41.0512 | -303.587 | 0.2565811 | 0 | 0.073167509  | 0 | -0.083118263 |
| cov1_2_4_6_7_9_11    | 41.0513 | -303.587 | 0.2571615 | 0 | 0.083801781  | 0 | -0.078540114 |
| cov1_2_4_7_8_9_11    | 41.0559 | -303.589 | 0.2573107 | 0 | 0.0786392    | 0 | -0.078449893 |
| cov1_2_4_6_7_8_11    | 41.0616 | -303.592 | 0.256824  | 0 | 0.083008255  | 0 | -0.080440323 |
| cov2_3_4_6_8_9_10    | 41.1013 | -303.612 | 0.2673293 | 0 | 0            | 0 | -0.017511747 |
| cov2_3_4_6_7_9_10    | 41.1051 | -303.614 | 0.2673482 | 0 | 0            | 0 | -0.017322448 |
| cov3_4_6_7_8_9_10    | 41.1485 | -303.635 | 0.2676205 | 0 | 0            | 0 | 0            |
| cov1_4_6_8_9_10_11   | 41.1841 | -303.653 | 0.2584996 | 0 | 0.04804317   | 0 | 0            |
| cov1_4_6_7_9_10_11   | 41.1846 | -303.653 | 0.2584999 | 0 | 0.047778192  | 0 | 0            |
| cov1_4_7_8_9_10_11   | 41.1886 | -303.655 | 0.2586324 | 0 | 0.043095804  | 0 | 0            |
| cov2_3_6_7_8_9_10    | 41.3271 | -303.725 | 0.2675522 | 0 | 0            | 0 | 0.008345242  |
| cov1_6_7_8_9_10_11   | 41.3857 | -303.754 | 0.2576019 | 0 | 0.065512882  | 0 | 0            |
| cov4_6_7_8_9_10_11   | 41.3907 | -303.756 | 0.2588129 | 0 | 0            | 0 | 0            |
| cov2_4_6_7_8_10_11   | 41.571  | -303.847 | 0.2571924 | 0 | 0            | 0 | -0.063484616 |
| cov2_4_6_7_8_9_11    | 41.6147 | -303.868 | 0.2579973 | 0 | 0            | 0 | -0.058199574 |
| cov1_2_6_7_8_9_10    | 41.7159 | -303.919 | 0.2597374 | 0 | 0.12888196   | 0 | -0.039638033 |
| cov2_6_7_8_9_10_11   | 41.7712 | -303.947 | 0.2570007 | 0 | 0            | 0 | -0.014905661 |
| cov1_2_4_6_7_8_9     | 41.7922 | -303.957 | 0.2607583 | 0 | 0.11469795   | 0 | -0.072898337 |
| cov1_2_4_6_7_8_10    | 41.8032 | -303.963 | 0.2600225 | 0 | 0.11274335   | 0 | -0.077408761 |
| cov1_2_6_7_8_9_11    | 41.8077 | -303.965 | 0.2562329 | 0 | 0.095273924  | 0 | -0.040488922 |
| cov1_4_6_7_8_9_10    | 41.8484 | -303.985 | 0.2618578 | 0 | 0.079510418  | 0 | 0            |
| cov2_3_4_6_7_8_10    | 41.9348 | -304.028 | 0.2662072 | 0 | 0            | 0 | -0.018168508 |
| cov1_2_6_7_8_10_11   | 41.9561 | -304.039 | 0.2553341 | 0 | 0.093600049  | 0 | -0.041022593 |
| cov1_4_6_7_8_9_11    | 41.9818 | -304.052 | 0.2583817 | 0 | 0.048101118  | 0 | 0            |
| cov2_3_4_6_7_8_9     | 42.0719 | -304.097 | 0.2667789 | 0 | 0            | 0 | -0.014472919 |
| cov1_4_6_7_8_10_11   | 42.0796 | -304.101 | 0.2577088 | 0 | 0.04359943   | 0 | 0            |
| cov2_4_6_7_8_9_10    | 42.1534 | -304.138 | 0.2636673 | 0 | 0            | 0 | -0.04449981  |
| cov2_3_4_7_8_9_10    | 42.7617 | -304.442 | 0.2672508 | 0 | 0            | 0 | 0.018841337  |
| cov1_2_3_4_5_9_10_11 | 44.6934 | -301.893 | 0.2547635 | 0 | -0.033836293 | 0 | -0.023925849 |
| cov2_3_4_5_6_9_10_11 | 44.7181 | -301.906 | 0.2549245 | 0 | 0            | 0 | -0.032005943 |
| cov2_3_4_5_7_9_10_11 | 44.7238 | -301.908 | 0.2561861 | 0 | 0            | 0 | -0.033041213 |
| cov2_3_4_5_8_9_10_11 | 44.7255 | -301.909 | 0.2561646 | 0 | 0            | 0 | -0.033148755 |
| cov1_3_4_5_6_9_10_11 | 44.7539 | -301.923 | 0.2546872 | 0 | -0.04513825  | 0 | 0            |
| cov1_3_4_5_7_9_10_11 | 44.7581 | -301.926 | 0.2552209 | 0 | -0.047161345 | 0 | 0            |
| cov1_3_4_5_8_9_10_11 | 44.7585 | -301.926 | 0.2551974 | 0 | -0.047413707 | 0 | 0            |
| cov3_4_5_6_7_9_10_11 | 44.828  | -301.961 | 0.2562802 | 0 | 0            | 0 | 0            |
| cov3_4_5_6_8_9_10_11 | 44.8313 | -301.962 | 0.2562511 | 0 | 0            | 0 | 0            |
| cov2_3_5_6_7_9_10_11 | 44.8487 | -301.971 | 0.256225  | 0 | 0            | 0 | -0.048334007 |
| cov2_3_5_6_8_9_10_11 | 44.8503 | -301.972 | 0.2562027 | 0 | 0            | 0 | -0.048442436 |
| cov1_2_3_5_7_9_10_11 | 44.8621 | -301.978 | 0.2565653 | 0 | -0.003626031 | 0 | -0.049135419 |
| cov2_3_5_7_8_9_10_11 | 44.8624 | -301.978 | 0.2566845 | 0 | 0            | 0 | -0.049767845 |
| cov1_2_3_5_8_9_10_11 | 44.8634 | -301.978 | 0.2565335 | 0 | -0.004021851 | 0 | -0.049157264 |
| cov1_2_3_5_6_9_10_11 | 44.8698 | -301.981 | 0.2556252 | 0 | -0.004536298 | 0 | -0.049524038 |



|                      |         |          |           |   |              |              |
|----------------------|---------|----------|-----------|---|--------------|--------------|
| cov3_4_5_7_8_9_10_11 | 44.8985 | -301.996 | 0.2574776 | 0 | 0            | 0            |
| cov1_2_4_5_7_9_10_11 | 45.0207 | -302.057 | 0.2519296 | 0 | -0.063832658 | -0.027776946 |
| cov1_2_4_5_8_9_10_11 | 45.0219 | -302.057 | 0.2519452 | 0 | -0.063630938 | -0.027864015 |
| cov1_4_5_6_7_9_10_11 | 45.1047 | -302.099 | 0.2516505 | 0 | -0.079986155 | 0            |
| cov1_4_5_6_8_9_10_11 | 45.1053 | -302.099 | 0.2516504 | 0 | -0.07944532  | 0            |
| cov1_4_5_7_8_9_10_11 | 45.1146 | -302.104 | 0.2518376 | 0 | -0.087023354 | 0            |
| cov2_4_5_6_8_9_10_11 | 45.1517 | -302.122 | 0.252467  | 0 | 0            | -0.045494955 |
| cov2_4_5_6_7_9_10_11 | 45.154  | -302.123 | 0.2524697 | 0 | 0            | -0.045585768 |
| cov1_2_5_6_8_9_10_11 | 45.1717 | -302.132 | 0.2530812 | 0 | -0.030787248 | -0.051683695 |
| cov1_2_5_6_7_9_10_11 | 45.1725 | -302.133 | 0.2530814 | 0 | -0.031157166 | -0.051683549 |
| cov1_2_5_7_8_9_10_11 | 45.1875 | -302.14  | 0.2533494 | 0 | -0.039575931 | -0.051908287 |
| cov2_5_6_7_8_9_10_11 | 45.2239 | -302.158 | 0.2532014 | 0 | 0            | -0.057161433 |
| cov2_4_5_7_8_9_10_11 | 45.2594 | -302.176 | 0.2534895 | 0 | 0            | -0.053460239 |
| cov1_2_4_5_6_9_10_11 | 45.3261 | -302.21  | 0.2522999 | 0 | -0.036815029 | -0.036188053 |
| cov1_3_5_6_7_9_10_11 | 45.351  | -302.222 | 0.2583275 | 0 | -0.02569369  | 0            |
| cov1_3_5_6_8_9_10_11 | 45.3535 | -302.223 | 0.2582885 | 0 | -0.026462348 | 0            |
| cov1_3_5_7_8_9_10_11 | 45.3695 | -302.231 | 0.2586492 | 0 | -0.035109454 | 0            |
| cov3_5_6_7_8_9_10_11 | 45.3814 | -302.237 | 0.2589815 | 0 | 0            | 0            |
| cov4_5_6_7_8_9_10_11 | 45.4944 | -302.294 | 0.2529691 | 0 | 0            | 0            |
| cov1_2_3_4_5_7_9_10  | 45.548  | -302.321 | 0.2591928 | 0 | 0.013192088  | -0.018757021 |
| cov1_2_3_4_5_8_9_10  | 45.5512 | -302.322 | 0.259145  | 0 | 0.01258182   | -0.018678998 |
| cov2_3_4_5_6_7_9_10  | 45.5555 | -302.324 | 0.2589278 | 0 | 0            | -0.014983774 |
| cov2_3_4_5_7_8_9_10  | 45.5564 | -302.325 | 0.2588069 | 0 | 0            | -0.014051455 |
| cov2_3_4_5_6_8_9_10  | 45.5578 | -302.325 | 0.2589067 | 0 | 0            | -0.015124229 |
| cov1_3_4_5_7_8_9_10  | 45.59   | -302.341 | 0.259184  | 0 | -0.002199583 | 0            |
| cov3_4_5_6_7_8_9_10  | 45.5901 | -302.342 | 0.2592135 | 0 | 0            | 0            |
| cov1_3_4_5_6_7_9_10  | 45.5907 | -302.342 | 0.2591762 | 0 | -0.001883081 | 0            |
| cov1_3_4_5_6_8_9_10  | 45.5936 | -302.343 | 0.2591304 | 0 | -0.002654832 | 0            |
| cov1_2_3_4_5_6_9_10  | 45.6084 | -302.351 | 0.258105  | 0 | -0.002183162 | -0.017303983 |
| cov1_2_3_4_5_6_10_11 | 45.6461 | -302.37  | 0.2536653 | 0 | -0.034089594 | -0.021927492 |
| cov1_2_3_4_5_7_10_11 | 45.6597 | -302.376 | 0.2541504 | 0 | -0.039623542 | -0.022017317 |
| cov1_2_3_4_5_8_10_11 | 45.66   | -302.376 | 0.2541342 | 0 | -0.03983283  | -0.021999587 |
| cov2_3_4_5_6_7_10_11 | 45.6797 | -302.386 | 0.2546473 | 0 | 0            | -0.029928209 |
| cov2_3_4_5_6_8_10_11 | 45.6815 | -302.387 | 0.2546227 | 0 | 0            | -0.030061775 |
| cov1_3_4_5_6_7_10_11 | 45.7031 | -302.398 | 0.2539518 | 0 | -0.048171415 | 0            |
| cov1_3_4_5_6_8_10_11 | 45.7034 | -302.398 | 0.2539302 | 0 | -0.048491314 | 0            |
| cov1_3_4_5_7_8_10_11 | 45.7184 | -302.406 | 0.2541778 | 0 | -0.056862411 | 0            |
| cov1_2_3_5_7_8_9_10  | 45.7323 | -302.413 | 0.2606158 | 0 | 0.03854071   | -0.044233387 |
| cov1_2_3_5_6_7_9_10  | 45.7327 | -302.413 | 0.2605683 | 0 | 0.040373504  | -0.044167643 |
| cov2_3_4_5_7_8_10_11 | 45.7351 | -302.414 | 0.2555634 | 0 | 0            | -0.034359262 |
| cov1_5_6_7_8_9_10_11 | 45.7366 | -302.415 | 0.2548918 | 0 | -0.066286754 | 0            |
| cov1_2_3_5_6_8_9_10  | 45.7376 | -302.415 | 0.2605229 | 0 | 0.039402984  | -0.044202843 |
| cov1_2_3_4_7_9_10_11 | 45.7716 | -302.432 | 0.2609629 | 0 | 0.093579513  | -0.058494452 |
| cov1_2_3_4_8_9_10_11 | 45.7824 | -302.438 | 0.260899  | 0 | 0.09326866   | -0.058643839 |
| cov2_3_5_6_7_8_9_10  | 45.811  | -302.452 | 0.2600789 | 0 | 0            | -0.038029309 |
| cov1_2_3_5_6_7_10_11 | 45.8124 | -302.453 | 0.2552434 | 0 | -0.005261169 | -0.046479661 |
| cov2_3_5_6_7_8_10_11 | 45.8125 | -302.453 | 0.2553355 | 0 | 0            | -0.047135127 |

|                      |         |          |           |   |              |              |
|----------------------|---------|----------|-----------|---|--------------|--------------|
| cov3_4_5_6_7_8_10_11 | 45.8136 | -302.453 | 0.2554083 | 0 | 0            | 0            |
| cov1_2_3_5_6_8_10_11 | 45.8137 | -302.453 | 0.2552119 | 0 | -0.005794984 | -0.046508864 |
| cov1_2_3_5_7_8_10_11 | 45.8339 | -302.463 | 0.2555553 | 0 | -0.015282304 | -0.046731641 |
| cov1_2_3_6_7_9_10_11 | 45.8739 | -302.483 | 0.2609446 | 0 | 0.10506925   | -0.04219247  |
| cov1_2_3_7_8_9_10_11 | 45.8768 | -302.485 | 0.2610568 | 0 | 0.10071258   | -0.042326187 |
| cov1_2_4_5_6_8_9_10  | 45.8773 | -302.485 | 0.2558669 | 0 | -0.021496825 | -0.022247815 |
| cov1_2_4_5_7_8_9_10  | 45.8775 | -302.485 | 0.2558639 | 0 | -0.022527792 | -0.022220669 |
| cov1_2_4_5_6_7_9_10  | 45.878  | -302.485 | 0.2558644 | 0 | -0.021748014 | -0.022220538 |
| cov1_2_3_6_8_9_10_11 | 45.8876 | -302.49  | 0.2609016 | 0 | 0.10405027   | -0.042208813 |
| cov2_4_5_6_7_8_9_10  | 45.8995 | -302.496 | 0.2559955 | 0 | 0            | -0.029650038 |
| cov1_2_4_5_6_7_10_11 | 45.9248 | -302.509 | 0.250944  | 0 | -0.06291431  | -0.02539166  |
| cov1_2_4_5_6_8_10_11 | 45.925  | -302.509 | 0.2509495 | 0 | -0.062362656 | -0.025468119 |
| cov1_4_5_6_7_8_9_10  | 45.9377 | -302.515 | 0.2557337 | 0 | -0.040998197 | 0            |
| cov1_2_4_5_7_8_10_11 | 45.9419 | -302.517 | 0.2511829 | 0 | -0.072257883 | -0.025247192 |
| cov1_4_5_6_7_8_10_11 | 46.003  | -302.548 | 0.2508588 | 0 | -0.084147628 | 0            |
| cov1_2_3_4_5_6_9_11  | 46.0133 | -302.553 | 0.2550528 | 0 | -0.019335495 | -0.02130946  |
| cov1_2_3_4_5_7_9_11  | 46.0186 | -302.556 | 0.2553956 | 0 | -0.022501443 | -0.0214      |
| cov1_2_3_4_5_8_9_11  | 46.0188 | -302.556 | 0.2553745 | 0 | -0.022754729 | -0.021381159 |
| cov2_3_4_5_6_7_9_11  | 46.0227 | -302.558 | 0.255631  | 0 | 0            | -0.025733255 |
| cov2_3_4_5_6_8_9_11  | 46.0236 | -302.558 | 0.2556154 | 0 | 0            | -0.025843114 |
| cov2_3_4_5_7_8_9_11  | 46.0423 | -302.568 | 0.2562008 | 0 | 0            | -0.028413402 |
| cov1_2_5_6_7_8_9_10  | 46.0526 | -302.573 | 0.2572844 | 0 | 0.005078713  | -0.046937625 |
| cov1_3_4_5_6_7_9_11  | 46.0679 | -302.58  | 0.2552582 | 0 | -0.033852272 | 0            |
| cov1_3_4_5_6_8_9_11  | 46.0681 | -302.581 | 0.2552363 | 0 | -0.034157057 | 0            |
| cov1_3_4_5_7_8_9_11  | 46.0738 | -302.583 | 0.2554111 | 0 | -0.039350695 | 0            |
| cov1_2_5_6_7_8_10_11 | 46.085  | -302.589 | 0.2522916 | 0 | -0.037489027 | -0.049089124 |
| cov2_4_5_6_7_8_10_11 | 46.1018 | -302.597 | 0.2517632 | 0 | 0            | -0.045019234 |
| cov3_4_5_6_7_8_9_11  | 46.1216 | -302.607 | 0.2562671 | 0 | 0            | 0            |
| cov1_3_5_6_7_8_9_10  | 46.1425 | -302.618 | 0.2622285 | 0 | 0.011515265  | 0            |
| cov1_2_3_5_6_7_9_11  | 46.1617 | -302.627 | 0.2564735 | 0 | 0.007103103  | -0.044425942 |
| cov1_2_3_5_6_8_9_11  | 46.1628 | -302.628 | 0.2564432 | 0 | 0.006582054  | -0.044448755 |
| cov2_3_5_6_7_8_9_11  | 46.163  | -302.628 | 0.2563408 | 0 | 0            | -0.043438629 |
| cov1_2_3_5_7_8_9_11  | 46.1713 | -302.632 | 0.2566968 | 0 | 0.000286715  | -0.044607805 |
| cov1_2_3_4_6_9_10_11 | 46.1811 | -302.637 | 0.2590985 | 0 | 0.088191298  | -0.066247325 |
| cov1_2_3_4_5_7_8_11  | 46.2016 | -302.647 | 0.2572974 | 0 | 0.002408431  | -0.021280684 |
| cov2_3_4_5_6_7_8_11  | 46.2019 | -302.647 | 0.2572131 | 0 | 0            | -0.020201426 |
| cov1_2_3_4_5_6_7_11  | 46.2022 | -302.648 | 0.2572718 | 0 | 0.003650487  | -0.021277178 |
| cov1_2_3_4_5_6_8_11  | 46.2025 | -302.648 | 0.2572465 | 0 | 0.003264949  | -0.021251662 |
| cov1_3_4_6_7_9_10_11 | 46.2421 | -302.668 | 0.2623504 | 0 | 0.076937389  | 0            |
| cov1_3_4_7_8_9_10_11 | 46.2465 | -302.67  | 0.2624856 | 0 | 0.071863283  | 0            |
| cov1_3_6_7_8_9_10_11 | 46.2495 | -302.671 | 0.2624442 | 0 | 0.073178834  | 0            |
| cov1_3_4_5_6_7_8_11  | 46.2562 | -302.675 | 0.2572795 | 0 | -0.013127628 | 0            |
| cov1_3_4_6_8_9_10_11 | 46.2563 | -302.675 | 0.2623114 | 0 | 0.075782833  | 0            |
| cov1_3_5_6_7_8_10_11 | 46.266  | -302.679 | 0.257169  | 0 | -0.033426577 | 0            |
| cov1_2_4_5_6_7_9_11  | 46.2763 | -302.685 | 0.2523324 | 0 | -0.048430236 | -0.024631241 |
| cov1_2_4_5_6_8_9_11  | 46.2763 | -302.685 | 0.2523372 | 0 | -0.047883049 | -0.024705085 |
| cov1_2_4_5_7_8_9_11  | 46.2835 | -302.688 | 0.2524893 | 0 | -0.054594895 | -0.024543601 |

|                      |         |          |           |   |              |   |              |
|----------------------|---------|----------|-----------|---|--------------|---|--------------|
| cov1_2_3_5_6_7_8_11  | 46.3292 | -302.711 | 0.2582822 | 0 | 0.024899927  | 0 | -0.042574766 |
| cov1_4_5_6_7_8_9_11  | 46.3498 | -302.721 | 0.252232  | 0 | -0.069123549 | 0 | 0            |
| cov2_4_5_6_7_8_9_11  | 46.3805 | -302.737 | 0.2529396 | 0 | 0            | 0 | -0.039805483 |
| cov1_2_5_6_7_8_9_11  | 46.4184 | -302.756 | 0.2535953 | 0 | -0.024518203 | 0 | -0.046988695 |
| cov1_2_4_5_6_7_8_11  | 46.4588 | -302.776 | 0.2543786 | 0 | -0.027778473 | 0 | -0.024407973 |
| cov2_3_4_5_6_7_8_10  | 46.4662 | -302.78  | 0.257917  | 0 | 0            | 0 | -0.015731729 |
| cov1_2_3_4_5_6_7_10  | 46.4665 | -302.78  | 0.2579815 | 0 | 0.00332597   | 0 | -0.016706221 |
| cov1_2_3_4_5_7_8_10  | 46.4672 | -302.78  | 0.2580318 | 0 | 0.000658608  | 0 | -0.016702765 |
| cov1_2_3_4_5_6_8_10  | 46.4689 | -302.781 | 0.2579434 | 0 | 0.002552298  | 0 | -0.016638608 |
| cov1_3_4_5_6_7_8_10  | 46.4997 | -302.796 | 0.2579666 | 0 | -0.010206268 | 0 | 0            |
| cov2_3_4_6_8_9_10_11 | 46.5542 | -302.824 | 0.2614192 | 0 | 0            | 0 | -0.036631849 |
| cov2_3_4_6_7_9_10_11 | 46.5546 | -302.824 | 0.2614318 | 0 | 0            | 0 | -0.03648412  |
| cov1_3_5_6_7_8_9_11  | 46.5762 | -302.835 | 0.2582513 | 0 | -0.02017527  | 0 | 0            |
| cov1_2_3_4_7_8_9_10  | 46.6017 | -302.847 | 0.2647747 | 0 | 0.13257793   | 0 | -0.052602734 |
| cov1_2_3_4_6_7_9_10  | 46.603  | -302.848 | 0.264779  | 0 | 0.13197493   | 0 | -0.052579356 |
| cov1_2_3_4_6_8_9_10  | 46.6207 | -302.857 | 0.2647383 | 0 | 0.13089229   | 0 | -0.052706789 |
| cov1_2_3_5_6_7_8_10  | 46.6471 | -302.87  | 0.2593781 | 0 | 0.03018708   | 0 | -0.0419164   |
| cov1_2_3_6_7_8_9_10  | 46.6905 | -302.892 | 0.2648695 | 0 | 0.13677418   | 0 | -0.037804547 |
| cov1_2_4_5_6_7_8_10  | 46.7453 | -302.919 | 0.254954  | 0 | -0.028771053 | 0 | -0.01996474  |
| cov3_4_6_7_8_9_10_11 | 46.756  | -302.924 | 0.2623583 | 0 | 0            | 0 | 0            |
| cov2_3_6_7_8_9_10_11 | 46.7685 | -302.931 | 0.2616432 | 0 | 0            | 0 | -0.011513812 |
| cov1_2_3_4_5_7_8_9   | 46.7925 | -302.943 | 0.2591598 | 0 | 0.016523612  | 0 | -0.016185216 |
| cov1_2_3_4_5_6_7_9   | 46.7934 | -302.943 | 0.2591566 | 0 | 0.015981185  | 0 | -0.016201508 |
| cov1_2_3_4_5_6_8_9   | 46.7956 | -302.944 | 0.2591197 | 0 | 0.015229178  | 0 | -0.016134875 |
| cov1_2_3_4_6_7_10_11 | 46.7994 | -302.946 | 0.259897  | 0 | 0.093568145  | 0 | -0.057370266 |
| cov2_3_4_5_6_7_8_9   | 46.8032 | -302.948 | 0.2588551 | 0 | 0            | 0 | -0.011723459 |
| cov1_2_3_4_6_8_10_11 | 46.8107 | -302.952 | 0.2598562 | 0 | 0.092642154  | 0 | -0.057493596 |
| cov1_2_3_4_7_8_10_11 | 46.8116 | -302.952 | 0.2601084 | 0 | 0.085408494  | 0 | -0.05720147  |
| cov1_3_4_5_6_7_8_9   | 46.8244 | -302.959 | 0.2591323 | 0 | 0.002825566  | 0 | 0            |
| cov1_2_3_6_7_8_10_11 | 46.9296 | -303.011 | 0.2600388 | 0 | 0.099687788  | 0 | -0.039323582 |
| cov1_2_3_4_5_6_7_8   | 46.9454 | -303.019 | 0.2608846 | 0 | 0.033840799  | 0 | -0.016153539 |
| cov1_2_3_4_6_7_9_11  | 46.9467 | -303.02  | 0.2605799 | 0 | 0.095204164  | 0 | -0.053452355 |
| cov1_2_3_4_7_8_9_11  | 46.9506 | -303.022 | 0.2607167 | 0 | 0.090268466  | 0 | -0.053360527 |
| cov1_2_3_5_6_7_8_9   | 46.9544 | -303.024 | 0.2604638 | 0 | 0.041368168  | 0 | -0.040061799 |
| cov1_2_3_4_6_8_9_11  | 46.9563 | -303.025 | 0.2605416 | 0 | 0.094377233  | 0 | -0.053566174 |
| cov1_2_3_4_6_7_8_11  | 46.9581 | -303.026 | 0.2608813 | 0 | 0.096381952  | 0 | -0.05206624  |
| cov2_3_4_7_8_9_10_11 | 46.9696 | -303.031 | 0.2600892 | 0 | 0            | 0 | -0.024195315 |
| cov1_3_4_6_7_8_9_10  | 46.9871 | -303.04  | 0.2660022 | 0 | 0.11004154   | 0 | 0            |
| cov1_2_3_6_7_8_9_11  | 47.037  | -303.065 | 0.2607045 | 0 | 0.10046375   | 0 | -0.038437358 |
| cov1_2_4_5_6_7_8_9   | 47.0563 | -303.075 | 0.2562017 | 0 | -0.015454502 | 0 | -0.019413011 |
| cov1_2_4_6_8_9_10_11 | 47.1191 | -303.106 | 0.2570869 | 0 | 0.08700201   | 0 | -0.085421825 |
| cov1_2_4_6_7_9_10_11 | 47.12   | -303.106 | 0.257088  | 0 | 0.08681681   | 0 | -0.085410445 |
| cov1_2_4_7_8_9_10_11 | 47.1268 | -303.11  | 0.2572648 | 0 | 0.080611784  | 0 | -0.085285628 |
| cov1_3_4_6_7_8_10_11 | 47.2553 | -303.174 | 0.2613927 | 0 | 0.071642117  | 0 | 0            |
| cov1_3_4_6_7_8_9_11  | 47.3433 | -303.218 | 0.2619511 | 0 | 0.074833565  | 0 | 0            |
| cov2_3_4_6_7_8_10_11 | 47.4963 | -303.295 | 0.2605036 | 0 | 0            | 0 | -0.03660556  |
| cov1_2_3_4_6_7_8_10  | 47.5862 | -303.34  | 0.2637669 | 0 | 0.12541792   | 0 | -0.051559751 |

|                        |         |          |           |   |              |   |              |
|------------------------|---------|----------|-----------|---|--------------|---|--------------|
| cov2_3_4_6_7_8_9_11    | 47.6667 | -303.38  | 0.2611951 | 0 | 0            | 0 | -0.032452581 |
| cov1_2_3_4_6_7_8_9     | 47.7027 | -303.398 | 0.2643389 | 0 | 0.12642088   | 0 | -0.047880246 |
| cov2_4_6_7_8_9_10_11   | 47.7245 | -303.409 | 0.2579768 | 0 | 0            | 0 | -0.064207055 |
| cov1_2_4_6_7_8_9_10    | 47.9313 | -303.512 | 0.2608712 | 0 | 0.11897639   | 0 | -0.079256053 |
| cov1_2_6_7_8_9_10_11   | 48.0086 | -303.551 | 0.2561513 | 0 | 0.098961438  | 0 | -0.04380406  |
| cov1_2_4_6_7_8_10_11   | 48.0669 | -303.58  | 0.256358  | 0 | 0.081633869  | 0 | -0.083355773 |
| cov1_2_4_6_7_8_9_11    | 48.0794 | -303.586 | 0.257162  | 0 | 0.084077386  | 0 | -0.078561556 |
| cov2_3_4_6_7_8_9_10    | 48.1299 | -303.611 | 0.2673377 | 0 | 0            | 0 | -0.017441494 |
| cov1_4_6_7_8_9_10_11   | 48.2132 | -303.653 | 0.2585006 | 0 | 0.047975949  | 0 | 0            |
| cov1_2_3_4_5_6_9_10_11 | 51.7127 | -301.888 | 0.2545733 | 0 | -0.026927851 | 0 | -0.024032627 |
| cov1_2_3_4_5_7_9_10_11 | 51.7153 | -301.89  | 0.2551858 | 0 | -0.028023799 | 0 | -0.024331661 |
| cov1_2_3_4_5_8_9_10_11 | 51.7159 | -301.89  | 0.2551602 | 0 | -0.028337859 | 0 | -0.024304919 |
| cov2_3_4_5_6_7_9_10_11 | 51.7225 | -301.893 | 0.2554983 | 0 | 0            | 0 | -0.029771759 |
| cov2_3_4_5_6_8_9_10_11 | 51.7243 | -301.894 | 0.2554745 | 0 | 0            | 0 | -0.029906356 |
| cov2_3_4_5_7_8_9_10_11 | 51.7525 | -301.908 | 0.2561906 | 0 | 0            | 0 | -0.033044757 |
| cov1_3_4_5_6_7_9_10_11 | 51.7779 | -301.921 | 0.2550429 | 0 | -0.04045347  | 0 | 0            |
| cov1_3_4_5_6_8_9_10_11 | 51.7785 | -301.921 | 0.2550165 | 0 | -0.040871292 | 0 | 0            |
| cov1_3_4_5_7_8_9_10_11 | 51.7869 | -301.925 | 0.255227  | 0 | -0.047125357 | 0 | 0            |
| cov3_4_5_6_7_8_9_10_11 | 51.8552 | -301.96  | 0.2562721 | 0 | 0            | 0 | 0            |
| cov2_3_5_6_7_8_9_10_11 | 51.8767 | -301.97  | 0.2562207 | 0 | 0            | 0 | -0.048295066 |
| cov1_2_3_5_6_7_9_10_11 | 51.8769 | -301.97  | 0.2563077 | 0 | 0.004469267  | 0 | -0.04892846  |
| cov1_2_3_5_6_8_9_10_11 | 51.8787 | -301.971 | 0.2562726 | 0 | 0.003828173  | 0 | -0.04895551  |
| cov1_2_3_5_7_8_9_10_11 | 51.8907 | -301.977 | 0.2565711 | 0 | -0.003600801 | 0 | -0.049149243 |
| cov1_2_4_5_6_7_9_10_11 | 52.0389 | -302.051 | 0.2517351 | 0 | -0.056434065 | 0 | -0.027897787 |
| cov1_2_4_5_6_8_9_10_11 | 52.039  | -302.051 | 0.2517406 | 0 | -0.055876864 | 0 | -0.027963454 |
| cov1_2_4_5_7_8_9_10_11 | 52.0496 | -302.057 | 0.251933  | 0 | -0.06380972  | 0 | -0.027786085 |
| cov1_4_5_6_7_8_9_10_11 | 52.1333 | -302.099 | 0.2516518 | 0 | -0.079796572 | 0 | 0            |
| cov2_4_5_6_7_8_9_10_11 | 52.1807 | -302.122 | 0.2524669 | 0 | 0            | 0 | -0.045485485 |
| cov1_2_5_6_7_8_9_10_11 | 52.2007 | -302.132 | 0.2530812 | 0 | -0.030902736 | 0 | -0.051683738 |
| cov1_3_5_6_7_8_9_10_11 | 52.3789 | -302.221 | 0.2583286 | 0 | -0.025386583 | 0 | 0            |
| cov1_2_3_4_5_7_8_9_10  | 52.5762 | -302.32  | 0.2592151 | 0 | 0.013205405  | 0 | -0.018798361 |
| cov1_2_3_4_5_6_7_9_10  | 52.5771 | -302.32  | 0.2591852 | 0 | 0.013629654  | 0 | -0.01876018  |
| cov1_2_3_4_5_6_8_9_10  | 52.5802 | -302.322 | 0.2591425 | 0 | 0.01273957   | 0 | -0.018681847 |
| cov2_3_4_5_6_7_8_9_10  | 52.584  | -302.324 | 0.2589257 | 0 | 0            | 0 | -0.014936525 |
| cov1_3_4_5_6_7_8_9_10  | 52.619  | -302.341 | 0.2591742 | 0 | -0.001624049 | 0 | 0            |
| cov1_2_3_4_5_6_7_10_11 | 52.6726 | -302.368 | 0.2539194 | 0 | -0.030573333 | 0 | -0.022181175 |
| cov1_2_3_4_5_6_8_10_11 | 52.673  | -302.368 | 0.2538954 | 0 | -0.030966377 | 0 | -0.022124508 |
| cov1_2_3_4_5_7_8_10_11 | 52.6887 | -302.376 | 0.2541541 | 0 | -0.039595873 | 0 | -0.022026139 |
| cov2_3_4_5_6_7_8_10_11 | 52.7073 | -302.386 | 0.2546427 | 0 | 0            | 0 | -0.029862905 |
| cov1_3_4_5_6_7_8_10_11 | 52.7316 | -302.398 | 0.2539544 | 0 | -0.04794431  | 0 | 0            |
| cov1_2_3_5_6_7_8_9_10  | 52.7605 | -302.412 | 0.2605696 | 0 | 0.040691513  | 0 | -0.044166883 |
| cov1_2_3_4_6_7_9_10_11 | 52.7937 | -302.429 | 0.2607937 | 0 | 0.099671901  | 0 | -0.058648559 |
| cov1_2_3_4_7_8_9_10_11 | 52.8    | -302.432 | 0.2609598 | 0 | 0.093614003  | 0 | -0.058524358 |
| cov1_2_3_4_6_8_9_10_11 | 52.8058 | -302.435 | 0.2607521 | 0 | 0.098710479  | 0 | -0.058775035 |
| cov1_2_3_5_6_7_8_10_11 | 52.8405 | -302.452 | 0.2552439 | 0 | -0.004965857 | 0 | -0.046483467 |
| cov1_2_3_6_7_8_9_10_11 | 52.902  | -302.483 | 0.2609456 | 0 | 0.10536048   | 0 | -0.042191123 |
| cov1_2_4_5_6_7_8_9_10  | 52.9064 | -302.485 | 0.2558671 | 0 | -0.021514804 | 0 | -0.022239272 |

|                            |         |          |           |   |              |   |              |
|----------------------------|---------|----------|-----------|---|--------------|---|--------------|
| cov1_2_4_5_6_7_8_10_11     | 52.9533 | -302.509 | 0.2509456 | 0 | -0.062697056 | 0 | -0.02541052  |
| cov1_2_3_4_5_6_7_9_11      | 53.041  | -302.552 | 0.2552414 | 0 | -0.016702512 | 0 | -0.021485314 |
| cov1_2_3_4_5_6_8_9_11      | 53.0413 | -302.553 | 0.2552165 | 0 | -0.017077935 | 0 | -0.021465514 |
| cov1_2_3_4_5_7_8_9_11      | 53.0473 | -302.556 | 0.2554004 | 0 | -0.022469107 | 0 | -0.021413071 |
| cov2_3_4_5_6_7_8_9_11      | 53.0505 | -302.557 | 0.2556315 | 0 | 0            | 0 | -0.025675916 |
| cov1_3_4_5_6_7_8_9_11      | 53.0962 | -302.58  | 0.2552608 | 0 | -0.033608207 | 0 | 0            |
| cov1_2_3_5_6_7_8_9_11      | 53.1896 | -302.627 | 0.2564761 | 0 | 0.007397253  | 0 | -0.044419167 |
| cov1_2_3_4_5_6_7_8_11      | 53.2303 | -302.647 | 0.2572733 | 0 | 0.003946791  | 0 | -0.021301766 |
| cov1_3_4_6_7_8_9_10_11     | 53.2702 | -302.667 | 0.2623514 | 0 | 0.077195594  | 0 | 0            |
| cov1_2_4_5_6_7_8_9_11      | 53.3048 | -302.684 | 0.2523367 | 0 | -0.048171377 | 0 | -0.024652438 |
| cov1_2_3_4_5_6_7_8_10      | 53.4948 | -302.779 | 0.2579747 | 0 | 0.0034735    | 0 | -0.016680693 |
| cov2_3_4_6_7_8_9_10_11     | 53.5825 | -302.823 | 0.2614303 | 0 | 0            | 0 | -0.036533071 |
| cov1_2_3_4_6_7_8_9_10      | 53.6307 | -302.847 | 0.2647795 | 0 | 0.13230624   | 0 | -0.052599278 |
| cov1_2_3_4_5_6_7_8_9       | 53.8215 | -302.943 | 0.2591596 | 0 | 0.016274352  | 0 | -0.016225093 |
| cov1_2_3_4_6_7_8_10_11     | 53.8273 | -302.946 | 0.2598995 | 0 | 0.093877773  | 0 | -0.057377647 |
| cov1_2_3_4_6_7_8_9_11      | 53.9745 | -303.019 | 0.2605802 | 0 | 0.095519901  | 0 | -0.053473197 |
| cov1_2_4_6_7_8_9_10_11     | 54.1481 | -303.106 | 0.2570871 | 0 | 0.087085835  | 0 | -0.085431805 |
| cov1_2_3_4_5_6_7_9_10_11   | 58.7345 | -301.885 | 0.2549975 | 0 | -0.020994738 | 0 | -0.024444225 |
| cov1_2_3_4_5_6_8_9_10_11   | 58.7353 | -301.885 | 0.2549676 | 0 | -0.021506411 | 0 | -0.024408835 |
| cov1_2_3_4_5_7_8_9_10_11   | 58.7441 | -301.889 | 0.2551894 | 0 | -0.027986171 | 0 | -0.024343972 |
| cov2_3_4_5_6_7_8_9_10_11   | 58.7502 | -301.893 | 0.2554932 | 0 | 0            | 0 | -0.029710037 |
| cov1_3_4_5_6_7_8_9_10_11   | 58.8063 | -301.921 | 0.2550464 | 0 | -0.040211847 | 0 | 0            |
| cov1_2_3_5_6_7_8_9_10_11   | 58.9048 | -301.97  | 0.2563093 | 0 | 0.00478012   | 0 | -0.048927528 |
| cov1_2_4_5_6_7_8_9_10_11   | 59.0674 | -302.051 | 0.2517374 | 0 | -0.056199229 | 0 | -0.027908862 |
| cov1_2_3_4_5_6_7_8_9_10    | 59.6052 | -302.32  | 0.2591881 | 0 | 0.013922089  | 0 | -0.018783518 |
| cov1_2_3_4_5_6_7_8_10_11   | 59.7009 | -302.368 | 0.253919  | 0 | -0.03025026  | 0 | -0.022237091 |
| cov1_2_3_4_6_7_8_9_10_11   | 59.8215 | -302.428 | 0.2607925 | 0 | 0.099993052  | 0 | -0.058667726 |
| cov1_2_3_4_5_6_7_8_9_11    | 60.0692 | -302.552 | 0.2552439 | 0 | -0.016425647 | 0 | -0.021510067 |
| cov1_2_3_4_5_6_7_8_9_10_11 | 65.7628 | -301.884 | 0.255     | 0 | -0.020717117 | 0 | -0.024466217 |

| SE | bsnp_rs7817754 | SE | bsnp_rs2047962 | SE | bsnp_rs6469668 | SE | bsnp_rs6469667 | SE | bsnp_rs7832958 |
|----|----------------|----|----------------|----|----------------|----|----------------|----|----------------|
| 0  | 0              | 0  | 0              | 0  | 0.10759218     | 0  | 0              | 0  | 0              |
| 0  | 0              | 0  | 0              | 0  | 0              | 0  | 0              | 0  | 0              |
| 0  | 0              | 0  | 0              | 0  | 0              | 0  | 0              | 0  | 0              |
| 0  | 0              | 0  | 0              | 0  | 0              | 0  | 0              | 0  | 0              |
| 0  | 0              | 0  | 0              | 0  | 0              | 0  | 0.083994988    | 0  | 0              |
| 0  | 0              | 0  | 0.081106061    | 0  | 0              | 0  | 0              | 0  | 0              |
| 0  | 0              | 0  | 0              | 0  | 0              | 0  | 0              | 0  | 0              |
| 0  | 0              | 0  | -0.043316337   | 0  | 0.14488083     | 0  | 0              | 0  | 0              |
| 0  | 0              | 0  | 0              | 0  | 0.088622842    | 0  | 0              | 0  | 0              |
| 0  | 0              | 0  | 0              | 0  | 0.12893456     | 0  | 0              | 0  | 0              |
| 0  | -0.025961306   | 0  | 0              | 0  | 0.10565904     | 0  | 0              | 0  | 0              |
| 0  | 0              | 0  | 0              | 0  | 0.10529366     | 0  | 0              | 0  | 0              |
| 0  | 0              | 0  | 0              | 0  | 0.10720966     | 0  | 0              | 0  | 0              |
| 0  | 0              | 0  | 0              | 0  | 0.10720532     | 0  | 0              | 0  | -0.017097455   |
| 0  | 0              | 0  | 0              | 0  | 0.10625531     | 0  | 0              | 0  | 0              |
| 0  | 0              | 0  | 0              | 0  | 0.11210338     | 0  | 0              | 0  | 0              |
| 0  | 0              | 0  | 0              | 0  | 0.11002568     | 0  | -0.003099912   | 0  | 0              |
| 0  | 0              | 0  | 0              | 0  | 0              | 0  | 0              | 0  | 0              |
| 0  | -0.040816993   | 0  | 0              | 0  | 0              | 0  | 0              | 0  | 0              |
| 0  | -0.072049636   | 0  | 0              | 0  | 0              | 0  | 0              | 0  | 0              |
| 0  | 0              | 0  | 0              | 0  | 0              | 0  | 0              | 0  | 0              |
| 0  | -0.057914679   | 0  | 0              | 0  | 0              | 0  | 0              | 0  | 0              |
| 0  | 0              | 0  | 0              | 0  | 0              | 0  | 0              | 0  | -0.025277513   |
| 0  | 0              | 0  | 0              | 0  | 0              | 0  | 0              | 0  | 0              |
| 0  | 0              | 0  | 0.04739619     | 0  | 0              | 0  | 0              | 0  | 0              |
| 0  | 0              | 0  | 0              | 0  | 0              | 0  | 0              | 0  | 0              |
| 0  | 0              | 0  | 0              | 0  | 0              | 0  | 0              | 0  | 0              |
| 0  | 0              | 0  | 0.029688882    | 0  | 0              | 0  | 0              | 0  | 0              |
| 0  | 0              | 0  | 0              | 0  | 0              | 0  | 0              | 0  | 0              |
| 0  | -0.057000913   | 0  | 0              | 0  | 0              | 0  | 0.089692116    | 0  | 0              |
| 0  | 0              | 0  | 0              | 0  | 0              | 0  | 0              | 0  | 0              |
| 0  | 0              | 0  | 0              | 0  | 0              | 0  | 0.04324775     | 0  | 0              |
| 0  | 0              | 0  | 0              | 0  | 0              | 0  | 0              | 0  | 0              |
| 0  | 0              | 0  | 0              | 0  | 0              | 0  | 0              | 0  | -0.011173314   |
| 0  | 0              | 0  | 0              | 0  | 0              | 0  | -0.001241647   | 0  | 0              |
| 0  | 0              | 0  | 0              | 0  | 0              | 0  | 0              | 0  | -0.044974284   |
| 0  | 0              | 0  | 0              | 0  | 0              | 0  | 0              | 0  | 0              |
| 0  | 0              | 0  | 0.04517851     | 0  | 0              | 0  | 0.053077562    | 0  | 0              |
| 0  | 0              | 0  | 0              | 0  | 0              | 0  | 0              | 0  | 0              |
| 0  | 0              | 0  | 0              | 0  | 0              | 0  | 0              | 0  | 0              |
| 0  | 0              | 0  | 0              | 0  | 0              | 0  | 0              | 0  | 0              |
| 0  | 0              | 0  | 0              | 0  | 0              | 0  | 0.091373435    | 0  | 0              |
| 0  | 0              | 0  | 0              | 0  | 0              | 0  | 0.083457878    | 0  | -0.015865687   |
| 0  | 0              | 0  | 0              | 0  | 0              | 0  | 0.083447361    | 0  | 0              |
| 0  | 0              | 0  | 0              | 0  | 0              | 0  | 0.087099237    | 0  | 0              |

|   |              |   |              |   |             |   |              |   |              |
|---|--------------|---|--------------|---|-------------|---|--------------|---|--------------|
| 0 | 0            | 0 | 0            | 0 | 0           | 0 | 0.08064606   | 0 | 0            |
| 0 | 0            | 0 | 0.078175008  | 0 | 0           | 0 | 0            | 0 | 0            |
| 0 | -0.023763839 | 0 | 0.078338265  | 0 | 0           | 0 | 0            | 0 | 0            |
| 0 | 0            | 0 | 0.079030597  | 0 | 0           | 0 | 0            | 0 | 0            |
| 0 | 0            | 0 | 0.076696837  | 0 | 0           | 0 | 0            | 0 | 0            |
| 0 | 0            | 0 | 0.080703063  | 0 | 0           | 0 | 0            | 0 | 0            |
| 0 | 0            | 0 | 0.080710237  | 0 | 0           | 0 | 0            | 0 | -0.005414956 |
| 0 | -0.053613487 | 0 | 0            | 0 | 0           | 0 | 0            | 0 | 0            |
| 0 | 0            | 0 | 0            | 0 | 0           | 0 | 0            | 0 | -0.017679083 |
| 0 | 0            | 0 | 0            | 0 | 0           | 0 | 0            | 0 | 0            |
| 0 | 0            | 0 | 0            | 0 | 0           | 0 | 0            | 0 | 0            |
| 0 | 0            | 0 | 0            | 0 | 0           | 0 | 0            | 0 | 0            |
| 0 | 0            | 0 | 0            | 0 | 0.10999773  | 0 | 0            | 0 | 0            |
| 0 | -0.044968802 | 0 | 0            | 0 | 0.073560319 | 0 | 0            | 0 | 0            |
| 0 | 0            | 0 | 0            | 0 | 0.11313737  | 0 | 0            | 0 | 0            |
| 0 | 0            | 0 | 0            | 0 | 0.13869576  | 0 | 0            | 0 | 0            |
| 0 | -0.030785883 | 0 | -0.049484233 | 0 | 0.14789719  | 0 | 0            | 0 | 0            |
| 0 | 0            | 0 | -0.041591999 | 0 | 0.12523701  | 0 | 0            | 0 | 0            |
| 0 | -0.034224316 | 0 | 0            | 0 | 0.10177428  | 0 | 0            | 0 | 0            |
| 0 | 0            | 0 | -0.045587867 | 0 | 0.14431396  | 0 | 0            | 0 | 0            |
| 0 | 0            | 0 | 0            | 0 | 0.11198663  | 0 | 0            | 0 | 0            |
| 0 | 0            | 0 | -0.048613358 | 0 | 0.14886327  | 0 | 0            | 0 | 0            |
| 0 | 0            | 0 | -0.048618047 | 0 | 0.14885807  | 0 | 0            | 0 | -0.02586011  |
| 0 | 0            | 0 | 0            | 0 | 0.13460439  | 0 | 0            | 0 | 0            |
| 0 | 0            | 0 | 0            | 0 | 0.085634211 | 0 | 0            | 0 | 0            |
| 0 | 0            | 0 | 0            | 0 | 0.085601389 | 0 | 0            | 0 | -0.025781853 |
| 0 | 0            | 0 | 0            | 0 | 0.10106249  | 0 | -0.02266828  | 0 | 0            |
| 0 | 0            | 0 | -0.032889114 | 0 | 0.14829525  | 0 | 0            | 0 | 0            |
| 0 | 0            | 0 | -0.044336381 | 0 | 0.14419997  | 0 | 0            | 0 | 0            |
| 0 | 0            | 0 | 0            | 0 | 0.089729903 | 0 | 0            | 0 | 0            |
| 0 | -0.019697654 | 0 | 0            | 0 | 0.12249002  | 0 | 0            | 0 | 0            |
| 0 | -0.030882806 | 0 | 0            | 0 | 0.10294162  | 0 | 0            | 0 | 0            |
| 0 | -0.054629266 | 0 | 0            | 0 | 0           | 0 | 0            | 0 | 0            |
| 0 | 0            | 0 | -0.043627063 | 0 | 0.15137195  | 0 | 0            | 0 | 0            |
| 0 | 0            | 0 | 0            | 0 | 0.11346799  | 0 | 0            | 0 | 0            |
| 0 | 0            | 0 | 0            | 0 | 0.13818722  | 0 | 0            | 0 | 0            |
| 0 | 0            | 0 | -0.04328495  | 0 | 0.14701819  | 0 | -0.002757121 | 0 | 0            |
| 0 | 0            | 0 | 0            | 0 | 0.12906425  | 0 | 0            | 0 | 0            |
| 0 | 0            | 0 | 0            | 0 | 0.1290464   | 0 | 0            | 0 | -0.018794324 |
| 0 | 0            | 0 | 0            | 0 | 0.088777186 | 0 | 0            | 0 | 0            |
| 0 | 0            | 0 | 0            | 0 | 0.12184033  | 0 | 0.01545963   | 0 | 0            |
| 0 | 0            | 0 | 0            | 0 | 0.1229912   | 0 | -0.023992503 | 0 | 0            |
| 0 | -0.03028607  | 0 | 0            | 0 | 0.092854454 | 0 | 0            | 0 | 0            |
| 0 | -0.028577721 | 0 | 0            | 0 | 0.098483235 | 0 | 0.008890437  | 0 | 0            |
| 0 | -0.031387985 | 0 | 0            | 0 | 0.10550196  | 0 | 0            | 0 | 0.010928029  |
| 0 | -0.031106671 | 0 | 0            | 0 | 0.10550683  | 0 | 0            | 0 | 0            |
| 0 | 0            | 0 | 0            | 0 | 0.10506836  | 0 | 0            | 0 | 0            |

[illegible]



|   |              |   |             |   |   |   |              |   |              |
|---|--------------|---|-------------|---|---|---|--------------|---|--------------|
| 0 | 0            | 0 | 0.039388973 | 0 | 0 | 0 | 0.019895515  | 0 | 0            |
| 0 | 0            | 0 | 0           | 0 | 0 | 0 | 0            | 0 | 0            |
| 0 | 0            | 0 | 0.047487484 | 0 | 0 | 0 | 0            | 0 | 0            |
| 0 | 0            | 0 | 0.047378392 | 0 | 0 | 0 | 0            | 0 | 0            |
| 0 | 0            | 0 | 0           | 0 | 0 | 0 | -0.007891745 | 0 | 0            |
| 0 | 0            | 0 | 0           | 0 | 0 | 0 | 0            | 0 | 0            |
| 0 | -0.046897558 | 0 | 0.029089501 | 0 | 0 | 0 | 0.06877619   | 0 | 0            |
| 0 | 0            | 0 | 0.024812697 | 0 | 0 | 0 | 0            | 0 | 0            |
| 0 | 0            | 0 | 0           | 0 | 0 | 0 | 0            | 0 | 0            |
| 0 | 0            | 0 | 0           | 0 | 0 | 0 | 0            | 0 | 0            |
| 0 | 0            | 0 | 0           | 0 | 0 | 0 | 0            | 0 | -0.010525853 |
| 0 | 0            | 0 | 0.028131364 | 0 | 0 | 0 | 0            | 0 | 0            |
| 0 | 0            | 0 | 0.029066268 | 0 | 0 | 0 | 0            | 0 | 0            |
| 0 | 0            | 0 | 0.029066178 | 0 | 0 | 0 | 0            | 0 | -0.007292063 |
| 0 | 0            | 0 | 0           | 0 | 0 | 0 | 0.000987297  | 0 | 0            |
| 0 | 0            | 0 | 0.029769173 | 0 | 0 | 0 | -0.00327702  | 0 | 0            |
| 0 | 0            | 0 | 0           | 0 | 0 | 0 | 0.037336801  | 0 | -0.034741818 |
| 0 | 0            | 0 | 0           | 0 | 0 | 0 | 0.037292007  | 0 | 0            |
| 0 | 0            | 0 | 0           | 0 | 0 | 0 | 0            | 0 | 0            |
| 0 | 0            | 0 | 0           | 0 | 0 | 0 | 0            | 0 | -0.013101997 |
| 0 | -0.055326102 | 0 | 0           | 0 | 0 | 0 | 0.092656704  | 0 | 0            |
| 0 | 0            | 0 | 0           | 0 | 0 | 0 | 0.004629395  | 0 | 0            |
| 0 | -0.057252901 | 0 | 0           | 0 | 0 | 0 | 0.084167434  | 0 | 0            |
| 0 | -0.057784606 | 0 | 0           | 0 | 0 | 0 | 0.088452057  | 0 | 0            |
| 0 | 0            | 0 | 0           | 0 | 0 | 0 | 0.05052486   | 0 | 0            |
| 0 | 0            | 0 | 0           | 0 | 0 | 0 | 0            | 0 | 0            |
| 0 | 0            | 0 | 0           | 0 | 0 | 0 | 0            | 0 | 0            |
| 0 | 0            | 0 | 0           | 0 | 0 | 0 | 0            | 0 | -0.012256563 |
| 0 | 0            | 0 | 0           | 0 | 0 | 0 | 0.050692198  | 0 | 0            |
| 0 | 0            | 0 | 0           | 0 | 0 | 0 | 0.00175816   | 0 | 0            |
| 0 | 0            | 0 | 0.066240964 | 0 | 0 | 0 | 0.071696751  | 0 | 0            |
| 0 | 0            | 0 | 0           | 0 | 0 | 0 | 0.045983856  | 0 | 0            |
| 0 | 0            | 0 | 0           | 0 | 0 | 0 | -0.000835474 | 0 | 0            |
| 0 | 0            | 0 | 0           | 0 | 0 | 0 | 0            | 0 | -0.001010297 |
| 0 | 0            | 0 | 0           | 0 | 0 | 0 | -0.000699831 | 0 | -0.011154106 |
| 0 | 0            | 0 | 0           | 0 | 0 | 0 | 0            | 0 | -0.042473333 |
| 0 | 0            | 0 | 0           | 0 | 0 | 0 | 0            | 0 | 0            |
| 0 | 0            | 0 | 0           | 0 | 0 | 0 | 0            | 0 | -0.046473213 |
| 0 | 0            | 0 | 0           | 0 | 0 | 0 | 0            | 0 | 0            |
| 0 | 0            | 0 | 0           | 0 | 0 | 0 | 0            | 0 | -0.044536615 |
| 0 | 0            | 0 | 0           | 0 | 0 | 0 | 0            | 0 | -0.049127092 |
| 0 | 0            | 0 | 0           | 0 | 0 | 0 | 0            | 0 | 0            |
| 0 | 0            | 0 | 0.043000082 | 0 | 0 | 0 | 0.05843897   | 0 | 0            |
| 0 | 0            | 0 | 0           | 0 | 0 | 0 | 0.092819825  | 0 | 0            |
| 0 | 0            | 0 | 0.04439865  | 0 | 0 | 0 | 0.053329208  | 0 | -0.008341102 |
| 0 | 0            | 0 | 0.044452138 | 0 | 0 | 0 | 0.053286775  | 0 | 0            |
| 0 | 0            | 0 | 0.045458959 | 0 | 0 | 0 | 0.052421338  | 0 | 0            |

|   |              |   |              |   |             |   |             |   |              |
|---|--------------|---|--------------|---|-------------|---|-------------|---|--------------|
| 0 | 0            | 0 | 0            | 0 | 0           | 0 | 0           | 0 | 0            |
| 0 | 0            | 0 | 0            | 0 | 0           | 0 | 0           | 0 | 0            |
| 0 | 0            | 0 | 0.080928023  | 0 | 0           | 0 | 0           | 0 | 0            |
| 0 | -0.033572344 | 0 | 0.073180211  | 0 | 0           | 0 | 0           | 0 | 0            |
| 0 | 0            | 0 | 0            | 0 | 0           | 0 | 0.091124202 | 0 | -0.017785753 |
| 0 | 0            | 0 | 0            | 0 | 0           | 0 | 0.091099204 | 0 | 0            |
| 0 | 0            | 0 | 0            | 0 | 0           | 0 | 0.086796128 | 0 | 0            |
| 0 | -0.030544104 | 0 | 0.074397871  | 0 | 0           | 0 | 0           | 0 | 0            |
| 0 | 0            | 0 | 0            | 0 | 0           | 0 | 0.086855585 | 0 | -0.016794008 |
| 0 | 0            | 0 | 0            | 0 | 0           | 0 | 0.086833026 | 0 | 0            |
| 0 | 0            | 0 | 0            | 0 | 0           | 0 | 0.083599453 | 0 | -0.085782535 |
| 0 | 0            | 0 | 0            | 0 | 0           | 0 | 0.080359948 | 0 | -0.015764689 |
| 0 | 0            | 0 | 0            | 0 | 0           | 0 | 0.080293113 | 0 | 0            |
| 0 | 0            | 0 | 0            | 0 | 0           | 0 | 0.083215118 | 0 | 0            |
| 0 | -0.031899057 | 0 | 0.059295055  | 0 | 0           | 0 | 0           | 0 | 0            |
| 0 | -0.037336908 | 0 | 0.078778235  | 0 | 0           | 0 | 0           | 0 | 0.027630244  |
| 0 | -0.036954919 | 0 | 0.078758956  | 0 | 0           | 0 | 0           | 0 | 0            |
| 0 | 0            | 0 | 0.0861782    | 0 | 0           | 0 | 0           | 0 | 0            |
| 0 | 0            | 0 | 0.077975368  | 0 | 0           | 0 | 0           | 0 | 0            |
| 0 | 0            | 0 | 0.077978797  | 0 | 0           | 0 | 0           | 0 | -0.002930158 |
| 0 | 0            | 0 | 0.082175501  | 0 | 0           | 0 | 0           | 0 | 0            |
| 0 | 0            | 0 | 0.078765254  | 0 | 0           | 0 | 0           | 0 | 0            |
| 0 | 0            | 0 | 0.078769228  | 0 | 0           | 0 | 0           | 0 | -0.003924605 |
| 0 | 0            | 0 | 0.075926285  | 0 | 0           | 0 | 0           | 0 | 0            |
| 0 | 0            | 0 | 0.075933852  | 0 | 0           | 0 | 0           | 0 | -0.00591555  |
| 0 | 0            | 0 | 0.080718384  | 0 | 0           | 0 | 0           | 0 | 0.01753763   |
| 0 | -0.083314027 | 0 | 0            | 0 | 0           | 0 | 0           | 0 | 0.058327018  |
| 0 | -0.082723766 | 0 | 0            | 0 | 0           | 0 | 0           | 0 | 0            |
| 0 | -0.057922022 | 0 | 0            | 0 | 0           | 0 | 0           | 0 | 0            |
| 0 | -0.055607086 | 0 | 0            | 0 | 0           | 0 | 0           | 0 | 0            |
| 0 | 0            | 0 | 0            | 0 | 0           | 0 | 0           | 0 | 0            |
| 0 | 0            | 0 | 0            | 0 | 0           | 0 | 0           | 0 | -0.017050157 |
| 0 | 0            | 0 | 0            | 0 | 0           | 0 | 0           | 0 | 0            |
| 0 | 0            | 0 | 0            | 0 | 0           | 0 | 0           | 0 | -0.017949418 |
| 0 | 0            | 0 | 0            | 0 | 0           | 0 | 0           | 0 | 0            |
| 0 | 0            | 0 | 0            | 0 | 0           | 0 | 0           | 0 | -0.009998915 |
| 0 | 0            | 0 | 0            | 0 | 0.14290344  | 0 | 0           | 0 | 0            |
| 0 | 0            | 0 | -0.048008585 | 0 | 0.15120309  | 0 | 0           | 0 | 0            |
| 0 | -0.033856503 | 0 | 0            | 0 | 0.10649546  | 0 | 0           | 0 | 0            |
| 0 | -0.050107109 | 0 | -0.050409378 | 0 | 0.11621607  | 0 | 0           | 0 | 0            |
| 0 | -0.038003968 | 0 | 0            | 0 | 0.09619438  | 0 | 0           | 0 | 0            |
| 0 | 0            | 0 | 0            | 0 | 0.092588756 | 0 | 0           | 0 | 0            |
| 0 | 0            | 0 | 0            | 0 | 0.123199    | 0 | 0           | 0 | 0            |
| 0 | 0            | 0 | 0            | 0 | 0.13652767  | 0 | 0           | 0 | 0            |
| 0 | -0.049268346 | 0 | 0            | 0 | 0.073843206 | 0 | 0           | 0 | 0            |
| 0 | 0            | 0 | 0            | 0 | 0.11122698  | 0 | 0           | 0 | 0            |
| 0 | 0            | 0 | 0            | 0 | 0.11118138  | 0 | 0           | 0 | -0.033248308 |

|   |              |   |              |   |             |   |              |              |
|---|--------------|---|--------------|---|-------------|---|--------------|--------------|
| 0 | -0.040715139 | 0 | -0.054824904 | 0 | 0.14802998  | 0 | 0            | 0            |
| 0 | 0            | 0 | 0            | 0 | 0.12379065  | 0 | -0.018838837 | 0            |
| 0 | 0            | 0 | 0            | 0 | 0.1097733   | 0 | 0            | 0            |
| 0 | 0            | 0 | 0            | 0 | 0.10976646  | 0 | 0            | -0.014616403 |
| 0 | 0            | 0 | 0            | 0 | 0.1184366   | 0 | 0            | 0            |
| 0 | -0.055021308 | 0 | 0            | 0 | 0.072452158 | 0 | 0            | 0.01926364   |
| 0 | -0.054721869 | 0 | 0            | 0 | 0.072467815 | 0 | 0            | 0            |
| 0 | -0.046757281 | 0 | 0            | 0 | 0.073561716 | 0 | 0            | 0            |
| 0 | -0.041737352 | 0 | 0            | 0 | 0.085416195 | 0 | 0            | 0            |
| 0 | -0.0263226   | 0 | 0            | 0 | 0.13112014  | 0 | 0            | 0            |
| 0 | -0.042940809 | 0 | 0            | 0 | 0.080552637 | 0 | -0.011503448 | 0            |
| 0 | 0            | 0 | -0.01626138  | 0 | 0.12370856  | 0 | 0            | 0            |
| 0 | 0            | 0 | 0            | 0 | 0.11425992  | 0 | -0.003043451 | 0            |
| 0 | 0            | 0 | 0            | 0 | 0.11346785  | 0 | 0            | 0            |
| 0 | 0            | 0 | 0            | 0 | 0.13968418  | 0 | 0            | 0            |
| 0 | 0            | 0 | -0.04831666  | 0 | 0.12717206  | 0 | 0            | 0            |
| 0 | 0            | 0 | -0.048348924 | 0 | 0.12715014  | 0 | 0            | -0.034440039 |
| 0 | -0.036979792 | 0 | -0.052569681 | 0 | 0.14727586  | 0 | 0            | 0            |
| 0 | 0            | 0 | -0.023267406 | 0 | 0.1517334   | 0 | 0            | 0            |
| 0 | 0            | 0 | -0.042426631 | 0 | 0.15017878  | 0 | 0            | 0            |
| 0 | 0            | 0 | 0            | 0 | 0.13856591  | 0 | 0            | 0            |
| 0 | 0            | 0 | 0            | 0 | 0.13855839  | 0 | 0            | -0.015217836 |
| 0 | 0            | 0 | -0.049520481 | 0 | 0.186304    | 0 | 0            | 0            |
| 0 | 0            | 0 | 0            | 0 | 0.14219612  | 0 | -0.006469531 | 0            |
| 0 | 0            | 0 | 0            | 0 | 0.14201715  | 0 | 0            | 0            |
| 0 | -0.089055793 | 0 | 0            | 0 | 0           | 0 | 0            | 0.063189199  |
| 0 | -0.088525458 | 0 | 0            | 0 | 0           | 0 | 0            | 0            |
| 0 | 0            | 0 | -0.04354252  | 0 | 0.12825257  | 0 | 0            | 0            |
| 0 | 0            | 0 | -0.040863184 | 0 | 0.13638175  | 0 | -0.021478524 | 0            |
| 0 | -0.035470485 | 0 | -0.049754616 | 0 | 0.13434241  | 0 | 0            | 0            |
| 0 | -0.034306052 | 0 | -0.050320449 | 0 | 0.13917481  | 0 | 0.011690236  | 0            |
| 0 | 0            | 0 | 0            | 0 | 0.11437041  | 0 | 0            | 0            |
| 0 | 0            | 0 | 0            | 0 | 0.11432433  | 0 | 0            | -0.03439441  |
| 0 | -0.053890421 | 0 | 0            | 0 | 0.10031416  | 0 | 0            | 0.03554848   |
| 0 | -0.053420911 | 0 | 0            | 0 | 0.10033183  | 0 | 0            | 0            |
| 0 | -0.032084442 | 0 | -0.049195372 | 0 | 0.14761103  | 0 | 0            | 0.002670132  |
| 0 | -0.031875109 | 0 | -0.049242475 | 0 | 0.14765804  | 0 | 0            | 0            |
| 0 | -0.030717135 | 0 | -0.049348482 | 0 | 0.14793044  | 0 | 0            | 0            |
| 0 | 0            | 0 | -0.04638592  | 0 | 0.16374292  | 0 | -0.025414348 | 0            |
| 0 | 0            | 0 | 0            | 0 | 0.11354889  | 0 | -0.041284619 | 0            |
| 0 | 0            | 0 | -0.050264277 | 0 | 0.14795529  | 0 | 0            | 0            |
| 0 | 0            | 0 | -0.050280199 | 0 | 0.14795625  | 0 | 0            | -0.023503853 |
| 0 | -0.054975473 | 0 | 0            | 0 | 0           | 0 | 0            | 0            |
| 0 | -0.024081495 | 0 | 0            | 0 | 0.12754835  | 0 | 0            | 0            |
| 0 | 0            | 0 | -0.042069687 | 0 | 0.12594312  | 0 | 0            | 0            |
| 0 | -0.030089415 | 0 | 0            | 0 | 0.11893218  | 0 | 0            | 0            |
| 0 | -0.031802567 | 0 | 0            | 0 | 0.11154269  | 0 | -0.012906067 | 0            |

|   |              |   |              |   |             |   |              |              |
|---|--------------|---|--------------|---|-------------|---|--------------|--------------|
| 0 | 0            | 0 | 0            | 0 | 0.12684489  | 0 | 0            | 0            |
| 0 | 0            | 0 | 0            | 0 | 0.10008529  | 0 | -0.027262691 | 0            |
| 0 | 0            | 0 | 0            | 0 | 0.099947986 | 0 | -0.027037422 | 0            |
| 0 | -0.028387544 | 0 | 0            | 0 | 0.095359979 | 0 | 0            | 0            |
| 0 | 0            | 0 | -0.026765043 | 0 | 0.14966379  | 0 | 0            | 0            |
| 0 | 0            | 0 | -0.038736864 | 0 | 0.15190765  | 0 | 0            | 0            |
| 0 | 0            | 0 | -0.038753418 | 0 | 0.15189426  | 0 | 0            | -0.024975291 |
| 0 | 0            | 0 | 0            | 0 | 0.13449975  | 0 | 0            | 0            |
| 0 | 0            | 0 | 0            | 0 | 0.13449025  | 0 | 0            | -0.016561049 |
| 0 | 0            | 0 | -0.049276984 | 0 | 0.14807576  | 0 | 0            | 0            |
| 0 | 0            | 0 | -0.049286937 | 0 | 0.14807183  | 0 | 0            | -0.024707668 |
| 0 | 0            | 0 | 0            | 0 | 0.086818182 | 0 | 0            | 0            |
| 0 | 0            | 0 | 0            | 0 | 0.086789447 | 0 | 0            | -0.023382323 |
| 0 | 0            | 0 | -0.046676897 | 0 | 0.17066153  | 0 | 0            | 0            |
| 0 | 0            | 0 | 0            | 0 | 0.11192996  | 0 | -0.006520187 | 0            |
| 0 | 0            | 0 | -0.049270363 | 0 | 0.15834326  | 0 | 0            | 0            |
| 0 | 0            | 0 | -0.049274066 | 0 | 0.15831276  | 0 | 0            | -0.026888503 |
| 0 | -0.024005317 | 0 | 0            | 0 | 0.11053046  | 0 | 0.022988347  | 0            |
| 0 | 0            | 0 | 0            | 0 | 0.10677562  | 0 | -0.031506847 | 0            |
| 0 | 0            | 0 | -0.048616238 | 0 | 0.15197786  | 0 | -0.003971458 | 0            |
| 0 | 0            | 0 | -0.048615946 | 0 | 0.15184444  | 0 | -0.003812238 | 0            |
| 0 | 0            | 0 | 0            | 0 | 0.12896555  | 0 | 0            | 0            |
| 0 | 0            | 0 | -0.048612458 | 0 | 0.14886218  | 0 | 0            | -6.48E-05    |
| 0 | 0            | 0 | 0            | 0 | 0.13350723  | 0 | 0.002059625  | 0            |
| 0 | 0            | 0 | 0            | 0 | 0.085620803 | 0 | 0            | -0.007172603 |
| 0 | 0            | 0 | 0            | 0 | 0.085602152 | 0 | 0            | 0            |
| 0 | 0            | 0 | 0            | 0 | 0.08557198  | 0 | 0            | -0.025853224 |
| 0 | 0            | 0 | -0.044722743 | 0 | 0.1555882   | 0 | -0.015172968 | 0            |
| 0 | -0.04524433  | 0 | 0            | 0 | 0.10178469  | 0 | 0            | 0.026073569  |
| 0 | -0.044827924 | 0 | 0            | 0 | 0.1018049   | 0 | 0            | 0            |
| 0 | 0            | 0 | -0.026691338 | 0 | 0.13695662  | 0 | 0            | 0            |
| 0 | 0            | 0 | -0.030055609 | 0 | 0.1428172   | 0 | 0.008303177  | 0            |
| 0 | 0            | 0 | 0            | 0 | 0.1146692   | 0 | 0            | 0            |
| 0 | 0            | 0 | 0            | 0 | 0.11464064  | 0 | 0            | -0.01709577  |
| 0 | 0            | 0 | 0            | 0 | 0.13894551  | 0 | 0            | 0            |
| 0 | 0            | 0 | 0            | 0 | 0.13894323  | 0 | 0            | -0.016282216 |
| 0 | -0.099276294 | 0 | 0            | 0 | 0           | 0 | 0            | 0.0634669    |
| 0 | -0.01853545  | 0 | 0            | 0 | 0.12288515  | 0 | 0            | 0            |
| 0 | -0.018793885 | 0 | 0            | 0 | 0.12279534  | 0 | 0            | -0.001608459 |
| 0 | -0.098629928 | 0 | 0            | 0 | 0           | 0 | 0            | 0            |
| 0 | -0.030246717 | 0 | 0            | 0 | 0.10545925  | 0 | -0.003361054 | 0            |
| 0 | -0.030051407 | 0 | 0            | 0 | 0.10633545  | 0 | 0            | 0            |
| 0 | 0            | 0 | 0            | 0 | 0.12226908  | 0 | 0.01479969   | 0            |
| 0 | 0            | 0 | 0            | 0 | 0.12219077  | 0 | 0.01493151   | -0.018375894 |
| 0 | -0.082354214 | 0 | 0            | 0 | 0           | 0 | 0            | 0.055784213  |
| 0 | -0.081871777 | 0 | 0            | 0 | 0           | 0 | 0            | 0            |
| 0 | 0            | 0 | 0            | 0 | 0.13870787  | 0 | -0.008223135 | 0            |

|   |              |   |              |   |             |   |              |   |              |
|---|--------------|---|--------------|---|-------------|---|--------------|---|--------------|
| 0 | 0            | 0 | -0.043811349 | 0 | 0.15156824  | 0 | 0.003605609  | 0 | 0            |
| 0 | -0.050296195 | 0 | 0            | 0 | 0.078027184 | 0 | 0            | 0 | 0.030516584  |
| 0 | 0            | 0 | 0            | 0 | 0.11349057  | 0 | 0.002562829  | 0 | 0            |
| 0 | -0.049498129 | 0 | 0            | 0 | 0.078580506 | 0 | 0            | 0 | 0            |
| 0 | 0            | 0 | 0            | 0 | 0.1290756   | 0 | 0            | 0 | 0.013077114  |
| 0 | 0            | 0 | 0            | 0 | 0.12284806  | 0 | -0.024108104 | 0 | 0            |
| 0 | 0            | 0 | 0            | 0 | 0.12276496  | 0 | -0.024001202 | 0 | -0.014660382 |
| 0 | -0.039640881 | 0 | 0            | 0 | 0.0938174   | 0 | 0.014335166  | 0 | 0.019059597  |
| 0 | -0.039375349 | 0 | 0            | 0 | 0.093835475 | 0 | 0.014315148  | 0 | 0            |
| 0 | -0.067577756 | 0 | 0            | 0 | 0           | 0 | 0            | 0 | 0            |
| 0 | -0.030332375 | 0 | 0            | 0 | 0.092842134 | 0 | 0.001979649  | 0 | 0            |
| 0 | -0.031426298 | 0 | 0            | 0 | 0.10551107  | 0 | 0            | 0 | 0.043299115  |
| 0 | 0            | 0 | 0            | 0 | 0.10507108  | 0 | 0            | 0 | 0.004482057  |
| 0 | 0            | 0 | 0            | 0 | 0.12656044  | 0 | 0            | 0 | 0            |
| 0 | 0            | 0 | 0            | 0 | 0.12655632  | 0 | 0            | 0 | -0.017019805 |
| 0 | 0            | 0 | 0            | 0 | 0.1163731   | 0 | -0.014198605 | 0 | 0            |
| 0 | 0            | 0 | 0            | 0 | 0.1162824   | 0 | -0.014082976 | 0 | -0.016011967 |
| 0 | 0            | 0 | 0            | 0 | 0.12600066  | 0 | -0.004435185 | 0 | 0            |
| 0 | 0            | 0 | 0            | 0 | 0.10603181  | 0 | 0            | 0 | 0.007338476  |
| 0 | 0            | 0 | 0            | 0 | 0.11336379  | 0 | 0.00078905   | 0 | 0            |
| 0 | 0            | 0 | 0            | 0 | 0.11336374  | 0 | 0            | 0 | 0.010210948  |
| 0 | 0            | 0 | 0            | 0 | 0.11333913  | 0 | 0.001002702  | 0 | -0.017751884 |
| 0 | 0            | 0 | 0            | 0 | 0.11036618  | 0 | -0.00401877  | 0 | 0.014084187  |
| 0 | -0.077976084 | 0 | 0            | 0 | 0           | 0 | 0            | 0 | 0            |
| 0 | -0.066501116 | 0 | 0            | 0 | 0           | 0 | 0            | 0 | 0            |
| 0 | -0.097064613 | 0 | 0            | 0 | 0           | 0 | 0            | 0 | 0.07858694   |
| 0 | -0.069458435 | 0 | 0            | 0 | 0           | 0 | 0            | 0 | 0            |
| 0 | -0.096226496 | 0 | 0            | 0 | 0           | 0 | 0            | 0 | 0            |
| 0 | -0.068261012 | 0 | 0            | 0 | 0           | 0 | -0.005748736 | 0 | 0            |
| 0 | -0.067099437 | 0 | 0.003344495  | 0 | 0           | 0 | 0            | 0 | 0            |
| 0 | -0.058755689 | 0 | 0            | 0 | 0           | 0 | 0            | 0 | 0            |
| 0 | -0.09522159  | 0 | 0            | 0 | 0           | 0 | 0.047151198  | 0 | 0            |
| 0 | -0.095396747 | 0 | 0            | 0 | 0           | 0 | 0.046998845  | 0 | 0.051136037  |
| 0 | -0.10542151  | 0 | 0            | 0 | 0           | 0 | 0            | 0 | 0.086894367  |
| 0 | -0.10448936  | 0 | 0            | 0 | 0           | 0 | 0            | 0 | 0            |
| 0 | -0.10068415  | 0 | -0.004275394 | 0 | 0           | 0 | 0            | 0 | 0.080756217  |
| 0 | -0.098432997 | 0 | 0            | 0 | 0           | 0 | 0            | 0 | 0.10806316   |
| 0 | -0.098418581 | 0 | 0            | 0 | 0           | 0 | 0.001665293  | 0 | 0.079200305  |
| 0 | -0.098446821 | 0 | 0            | 0 | 0           | 0 | 0            | 0 | 0.079280882  |
| 0 | -0.09974007  | 0 | -0.004085306 | 0 | 0           | 0 | 0            | 0 | 0            |
| 0 | -0.097617629 | 0 | 0            | 0 | 0           | 0 | 0.002630031  | 0 | 0            |
| 0 | -0.097554451 | 0 | 0            | 0 | 0           | 0 | 0            | 0 | 0            |
| 0 | -0.064170168 | 0 | 0.015494093  | 0 | 0           | 0 | 0.03073079   | 0 | 0            |
| 0 | 0            | 0 | 0            | 0 | 0           | 0 | 0            | 0 | -0.020375481 |
| 0 | 0            | 0 | 0            | 0 | 0           | 0 | 0            | 0 | 0            |
| 0 | -0.070234024 | 0 | 0            | 0 | 0           | 0 | 0.047452432  | 0 | 0            |
| 0 | -0.072120784 | 0 | 0            | 0 | 0           | 0 | 0.036232343  | 0 | 0            |

[illegible]

|   |              |   |             |   |   |   |              |   |              |
|---|--------------|---|-------------|---|---|---|--------------|---|--------------|
| 0 | 0            | 0 | 0           | 0 | 0 | 0 | 0.004207151  | 0 | 0            |
| 0 | 0            | 0 | 0.077135798 | 0 | 0 | 0 | 0            | 0 | 0            |
| 0 | 0            | 0 | 0.028454817 | 0 | 0 | 0 | 0            | 0 | -0.023293884 |
| 0 | 0            | 0 | 0.028481134 | 0 | 0 | 0 | 0            | 0 | 0            |
| 0 | 0            | 0 | 0           | 0 | 0 | 0 | 0.050481472  | 0 | 0            |
| 0 | 0            | 0 | 0.025880888 | 0 | 0 | 0 | 0            | 0 | 0            |
| 0 | 0            | 0 | 0           | 0 | 0 | 0 | 0            | 0 | 0            |
| 0 | -0.079970904 | 0 | 0.023258398 | 0 | 0 | 0 | 0.078252443  | 0 | 0            |
| 0 | -0.07999175  | 0 | 0.023458847 | 0 | 0 | 0 | 0.077998921  | 0 | 0.061084482  |
| 0 | 0            | 0 | 0           | 0 | 0 | 0 | -0.005856028 | 0 | 0            |
| 0 | 0            | 0 | 0           | 0 | 0 | 0 | 0            | 0 | -0.028923691 |
| 0 | 0            | 0 | 0           | 0 | 0 | 0 | 0            | 0 | 0            |
| 0 | 0            | 0 | 0.030610369 | 0 | 0 | 0 | -0.010106628 | 0 | 0            |
| 0 | 0            | 0 | 0.029302706 | 0 | 0 | 0 | 0            | 0 | 0            |
| 0 | -0.09952634  | 0 | 0           | 0 | 0 | 0 | 0.090684716  | 0 | 0            |
| 0 | -0.099635478 | 0 | 0           | 0 | 0 | 0 | 0.090541556  | 0 | 0.076662028  |
| 0 | 0            | 0 | 0.036278509 | 0 | 0 | 0 | 0.017183724  | 0 | -0.02676363  |
| 0 | 0            | 0 | 0.036387377 | 0 | 0 | 0 | 0.017065737  | 0 | 0            |
| 0 | -0.092226527 | 0 | 0           | 0 | 0 | 0 | 0.087913093  | 0 | 0            |
| 0 | -0.092347368 | 0 | 0           | 0 | 0 | 0 | 0.087578392  | 0 | 0.068639784  |
| 0 | -0.092743434 | 0 | 0           | 0 | 0 | 0 | 0.094624093  | 0 | 0            |
| 0 | -0.091399435 | 0 | 0           | 0 | 0 | 0 | 0.095541632  | 0 | 0.002375394  |
| 0 | -0.092796412 | 0 | 0           | 0 | 0 | 0 | 0.094491716  | 0 | 0.069067078  |
| 0 | 0            | 0 | 0.042611394 | 0 | 0 | 0 | 0            | 0 | -0.030247505 |
| 0 | 0            | 0 | 0.042660406 | 0 | 0 | 0 | 0            | 0 | 0            |
| 0 | 0            | 0 | 0           | 0 | 0 | 0 | 0            | 0 | -0.028102907 |
| 0 | 0            | 0 | 0           | 0 | 0 | 0 | 0            | 0 | 0            |
| 0 | 0            | 0 | 0.043042986 | 0 | 0 | 0 | 0            | 0 | -0.028089974 |
| 0 | 0            | 0 | 0.043091943 | 0 | 0 | 0 | 0            | 0 | 0            |
| 0 | 0            | 0 | 0           | 0 | 0 | 0 | -0.00227105  | 0 | 0            |
| 0 | 0            | 0 | 0.04284363  | 0 | 0 | 0 | 0            | 0 | -0.022329618 |
| 0 | 0            | 0 | 0.037098276 | 0 | 0 | 0 | 0.025422193  | 0 | 0            |
| 0 | 0            | 0 | 0           | 0 | 0 | 0 | -0.007620704 | 0 | -0.027183744 |
| 0 | 0            | 0 | 0           | 0 | 0 | 0 | -0.007934517 | 0 | 0            |
| 0 | 0            | 0 | 0           | 0 | 0 | 0 | 0            | 0 | -0.023935071 |
| 0 | 0            | 0 | 0.039682588 | 0 | 0 | 0 | 0.019208661  | 0 | 0            |
| 0 | 0            | 0 | 0           | 0 | 0 | 0 | 0            | 0 | -0.046020377 |
| 0 | 0            | 0 | 0           | 0 | 0 | 0 | 0            | 0 | 0            |
| 0 | -0.041254338 | 0 | 0.042909559 | 0 | 0 | 0 | 0.077389905  | 0 | 0            |
| 0 | 0            | 0 | 0           | 0 | 0 | 0 | -0.005279726 | 0 | 0            |
| 0 | 0            | 0 | 0           | 0 | 0 | 0 | 0            | 0 | 0            |
| 0 | 0            | 0 | 0           | 0 | 0 | 0 | 0            | 0 | -0.012379976 |
| 0 | -0.048195567 | 0 | 0.030435185 | 0 | 0 | 0 | 0.06501394   | 0 | 0            |
| 0 | 0            | 0 | 0.044840883 | 0 | 0 | 0 | 0.058538606  | 0 | 0            |
| 0 | 0            | 0 | 0           | 0 | 0 | 0 | 0.006525507  | 0 | 0            |
| 0 | -0.046317259 | 0 | 0.028443273 | 0 | 0 | 0 | 0.070665536  | 0 | 0            |
| 0 | 0            | 0 | 0           | 0 | 0 | 0 | 0.044981149  | 0 | -0.036661137 |

|   |              |   |             |   |   |   |   |              |   |              |
|---|--------------|---|-------------|---|---|---|---|--------------|---|--------------|
| 0 | 0            | 0 | 0           | 0 | 0 | 0 | 0 | 0.044922458  | 0 | 0            |
| 0 | 0            | 0 | 0.023817284 | 0 | 0 | 0 | 0 | 0            | 0 | 0            |
| 0 | 0            | 0 | 0.023825251 | 0 | 0 | 0 | 0 | 0            | 0 | -0.009454595 |
| 0 | 0            | 0 | 0.024742704 | 0 | 0 | 0 | 0 | 0.0014328    | 0 | 0            |
| 0 | 0            | 0 | 0           | 0 | 0 | 0 | 0 | 0            | 0 | 0            |
| 0 | 0            | 0 | 0           | 0 | 0 | 0 | 0 | 0            | 0 | -0.011494612 |
| 0 | 0            | 0 | 0           | 0 | 0 | 0 | 0 | 0.003611063  | 0 | 0            |
| 0 | 0            | 0 | 0           | 0 | 0 | 0 | 0 | 0.046250887  | 0 | -0.036183016 |
| 0 | 0            | 0 | 0           | 0 | 0 | 0 | 0 | 0.001361945  | 0 | 0            |
| 0 | 0            | 0 | 0           | 0 | 0 | 0 | 0 | 0.001490871  | 0 | -0.010565925 |
| 0 | 0            | 0 | 0           | 0 | 0 | 0 | 0 | 0            | 0 | 0.002859149  |
| 0 | 0            | 0 | 0           | 0 | 0 | 0 | 0 | 0.046115082  | 0 | 0            |
| 0 | 0            | 0 | 0.027279876 | 0 | 0 | 0 | 0 | 0            | 0 | 0            |
| 0 | 0            | 0 | 0.027285135 | 0 | 0 | 0 | 0 | 0            | 0 | -0.008051036 |
| 0 | 0            | 0 | 0           | 0 | 0 | 0 | 0 | 0.040590665  | 0 | -0.035582908 |
| 0 | 0            | 0 | 0.029145054 | 0 | 0 | 0 | 0 | -0.002969499 | 0 | 0            |
| 0 | 0            | 0 | 0.029144522 | 0 | 0 | 0 | 0 | -0.002884597 | 0 | -0.007202453 |
| 0 | 0            | 0 | 0.028221115 | 0 | 0 | 0 | 0 | -0.001854153 | 0 | 0            |
| 0 | 0            | 0 | 0.029077161 | 0 | 0 | 0 | 0 | 0            | 0 | 0.008336952  |
| 0 | 0            | 0 | 0           | 0 | 0 | 0 | 0 | 0.040536409  | 0 | 0            |
| 0 | 0            | 0 | 0           | 0 | 0 | 0 | 0 | 0.037475771  | 0 | -0.070306746 |
| 0 | 0            | 0 | 0           | 0 | 0 | 0 | 0 | 0.005275731  | 0 | 0            |
| 0 | 0            | 0 | 0           | 0 | 0 | 0 | 0 | 0.005434419  | 0 | -0.013285124 |
| 0 | 0            | 0 | 0           | 0 | 0 | 0 | 0 | 0            | 0 | 0.007968565  |
| 0 | 0            | 0 | 0           | 0 | 0 | 0 | 0 | 0            | 0 | 0            |
| 0 | -0.055509912 | 0 | 0           | 0 | 0 | 0 | 0 | 0.0867613    | 0 | 0            |
| 0 | -0.057935997 | 0 | 0           | 0 | 0 | 0 | 0 | 0.083282844  | 0 | 0            |
| 0 | 0            | 0 | 0           | 0 | 0 | 0 | 0 | 0.056583707  | 0 | 0            |
| 0 | 0            | 0 | 0           | 0 | 0 | 0 | 0 | 0.002360932  | 0 | 0            |
| 0 | 0            | 0 | 0.070206306 | 0 | 0 | 0 | 0 | 0.068366711  | 0 | 0            |
| 0 | 0            | 0 | 0           | 0 | 0 | 0 | 0 | 0.00250864   | 0 | -0.012341579 |
| 0 | 0            | 0 | 0           | 0 | 0 | 0 | 0 | 0            | 0 | 0.004144787  |
| 0 | 0            | 0 | 0           | 0 | 0 | 0 | 0 | 0.052678277  | 0 | 0            |
| 0 | 0            | 0 | 0.065490102 | 0 | 0 | 0 | 0 | 0.071691358  | 0 | -0.00583201  |
| 0 | 0            | 0 | 0.065544537 | 0 | 0 | 0 | 0 | 0.07166455   | 0 | 0            |
| 0 | 0            | 0 | 0.0651118   | 0 | 0 | 0 | 0 | 0.072733772  | 0 | 0            |
| 0 | 0            | 0 | 0           | 0 | 0 | 0 | 0 | -0.000846045 | 0 | 0.000849934  |
| 0 | 0            | 0 | 0           | 0 | 0 | 0 | 0 | 0            | 0 | -0.043806203 |
| 0 | 0            | 0 | 0           | 0 | 0 | 0 | 0 | 0            | 0 | 0            |
| 0 | -0.033235726 | 0 | 0.075966316 | 0 | 0 | 0 | 0 | 0            | 0 | 0            |
| 0 | 0            | 0 | 0           | 0 | 0 | 0 | 0 | 0            | 0 | -0.042461019 |
| 0 | 0            | 0 | 0           | 0 | 0 | 0 | 0 | 0            | 0 | -0.046039287 |
| 0 | 0            | 0 | 0           | 0 | 0 | 0 | 0 | 0            | 0 | 0            |
| 0 | 0            | 0 | 0           | 0 | 0 | 0 | 0 | 0            | 0 | -0.047862109 |
| 0 | 0            | 0 | 0           | 0 | 0 | 0 | 0 | 0            | 0 | -0.049507781 |
| 0 | 0            | 0 | 0           | 0 | 0 | 0 | 0 | 0.092577188  | 0 | -0.016773084 |
| 0 | 0            | 0 | 0           | 0 | 0 | 0 | 0 | 0.092554486  | 0 | 0            |



|   |              |   |             |   |             |   |             |   |              |
|---|--------------|---|-------------|---|-------------|---|-------------|---|--------------|
| 0 | 0            | 0 | 0.041926351 | 0 | 0           | 0 | 0.059124489 | 0 | -0.009792451 |
| 0 | 0            | 0 | 0.041993662 | 0 | 0           | 0 | 0.059059065 | 0 | 0            |
| 0 | 0            | 0 | 0           | 0 | 0           | 0 | 0.08928778  | 0 | 0            |
| 0 | 0            | 0 | 0.044289302 | 0 | 0           | 0 | 0.05347213  | 0 | -0.042290379 |
| 0 | 0            | 0 | 0.044547738 | 0 | 0           | 0 | 0.052997017 | 0 | -0.008252647 |
| 0 | 0            | 0 | 0.04460771  | 0 | 0           | 0 | 0.052940322 | 0 | 0            |
| 0 | -0.064424225 | 0 | 0.072353992 | 0 | 0           | 0 | 0           | 0 | 0.056169855  |
| 0 | -0.063834804 | 0 | 0.072342343 | 0 | 0           | 0 | 0           | 0 | 0            |
| 0 | 0            | 0 | 0.086882099 | 0 | 0           | 0 | 0           | 0 | 0            |
| 0 | 0            | 0 | 0.080755633 | 0 | 0           | 0 | 0           | 0 | 0            |
| 0 | 0            | 0 | 0.080760603 | 0 | 0           | 0 | 0           | 0 | -0.002484394 |
| 0 | -0.056790271 | 0 | 0.073620636 | 0 | 0           | 0 | 0           | 0 | 0.048037963  |
| 0 | -0.056249507 | 0 | 0.073609687 | 0 | 0           | 0 | 0           | 0 | 0            |
| 0 | -0.035352274 | 0 | 0.068085556 | 0 | 0           | 0 | 0           | 0 | 0            |
| 0 | 0            | 0 | 0           | 0 | 0           | 0 | 0.086752702 | 0 | -0.01767284  |
| 0 | 0            | 0 | 0           | 0 | 0           | 0 | 0.09125894  | 0 | -0.086734345 |
| 0 | 0            | 0 | 0           | 0 | 0           | 0 | 0.086670042 | 0 | 0            |
| 0 | -0.055601372 | 0 | 0.051663348 | 0 | 0           | 0 | 0           | 0 | 0.04104872   |
| 0 | -0.055028802 | 0 | 0.051803106 | 0 | 0           | 0 | 0           | 0 | 0            |
| 0 | -0.033974433 | 0 | 0.064674106 | 0 | 0           | 0 | 0           | 0 | 0            |
| 0 | 0            | 0 | 0           | 0 | 0           | 0 | 0.086989906 | 0 | -0.086123109 |
| 0 | 0            | 0 | 0           | 0 | 0           | 0 | 0.083160429 | 0 | -0.016701238 |
| 0 | 0            | 0 | 0           | 0 | 0           | 0 | 0.083083333 | 0 | 0            |
| 0 | 0            | 0 | 0           | 0 | 0           | 0 | 0.080699174 | 0 | -0.08308572  |
| 0 | -0.099853741 | 0 | 0           | 0 | 0           | 0 | 0           | 0 | 0.07670787   |
| 0 | -0.09911442  | 0 | 0           | 0 | 0           | 0 | 0           | 0 | 0            |
| 0 | -0.037371481 | 0 | 0.078786843 | 0 | 0           | 0 | 0           | 0 | 0.056883239  |
| 0 | -0.058552018 | 0 | 0           | 0 | 0           | 0 | 0           | 0 | 0            |
| 0 | 0            | 0 | 0.085894991 | 0 | 0           | 0 | 0           | 0 | 0            |
| 0 | 0            | 0 | 0.085907763 | 0 | 0           | 0 | 0           | 0 | -0.001680062 |
| 0 | 0            | 0 | 0.07798568  | 0 | 0           | 0 | 0           | 0 | 0.010377843  |
| 0 | -0.093410664 | 0 | 0           | 0 | 0           | 0 | 0           | 0 | 0.069579619  |
| 0 | -0.092713292 | 0 | 0           | 0 | 0           | 0 | 0           | 0 | 0            |
| 0 | 0            | 0 | 0.081611381 | 0 | 0           | 0 | 0           | 0 | 0            |
| 0 | 0            | 0 | 0.081633831 | 0 | 0           | 0 | 0           | 0 | -0.00347786  |
| 0 | 0            | 0 | 0.078778296 | 0 | 0           | 0 | 0           | 0 | 0.012874365  |
| 0 | 0            | 0 | 0.075960151 | 0 | 0           | 0 | 0           | 0 | 0.016003298  |
| 0 | -0.083341439 | 0 | 0           | 0 | 0           | 0 | 0           | 0 | 0.079394694  |
| 0 | 0            | 0 | 0           | 0 | 0           | 0 | 0           | 0 | -0.017053599 |
| 0 | 0            | 0 | 0           | 0 | 0           | 0 | 0           | 0 | 0            |
| 0 | 0            | 0 | 0           | 0 | 0.12630482  | 0 | 0           | 0 | 0            |
| 0 | -0.050150637 | 0 | 0           | 0 | 0.076462391 | 0 | 0           | 0 | 0            |
| 0 | -0.040619454 | 0 | -0.05721979 | 0 | 0.15490385  | 0 | 0           | 0 | 0            |
| 0 | 0            | 0 | 0           | 0 | 0           | 0 | 0           | 0 | -0.012663996 |
| 0 | 0            | 0 | 0           | 0 | 0           | 0 | 0           | 0 | -0.010098404 |
| 0 | -0.026066392 | 0 | 0           | 0 | 0.13539103  | 0 | 0           | 0 | 0            |
| 0 | -0.042538042 | 0 | 0           | 0 | 0.10567714  | 0 | 0           | 0 | 0            |

|   |              |   |              |   |             |   |              |   |              |
|---|--------------|---|--------------|---|-------------|---|--------------|---|--------------|
| 0 | 0            | 0 | 0            | 0 | 0.13803727  | 0 | 0            | 0 | 0            |
| 0 | 0            | 0 | -0.026955886 | 0 | 0.15807025  | 0 | 0            | 0 | 0            |
| 0 | 0            | 0 | -0.045756879 | 0 | 0.13312657  | 0 | 0            | 0 | 0            |
| 0 | -0.055620617 | 0 | -0.054461501 | 0 | 0.1199771   | 0 | 0            | 0 | 0            |
| 0 | 0            | 0 | 0            | 0 | 0.14277464  | 0 | 0            | 0 | 0            |
| 0 | 0            | 0 | 0            | 0 | 0.14276626  | 0 | 0            | 0 | -0.01517325  |
| 0 | 0            | 0 | -0.051225999 | 0 | 0.18626905  | 0 | 0            | 0 | 0            |
| 0 | 0            | 0 | 0            | 0 | 0.14051239  | 0 | 0            | 0 | 0            |
| 0 | 0            | 0 | 0            | 0 | 0.14338899  | 0 | -0.00090535  | 0 | 0            |
| 0 | 0            | 0 | -0.052773422 | 0 | 0.15492582  | 0 | 0            | 0 | 0            |
| 0 | 0            | 0 | -0.052786183 | 0 | 0.1549238   | 0 | 0            | 0 | -0.023908457 |
| 0 | -0.053168873 | 0 | 0            | 0 | 0.10504894  | 0 | 0            | 0 | 0.03490727   |
| 0 | -0.052680039 | 0 | 0            | 0 | 0.10506782  | 0 | 0            | 0 | 0            |
| 0 | 0            | 0 | 0            | 0 | 0.11383239  | 0 | -0.036971829 | 0 | 0            |
| 0 | 0            | 0 | -0.048589062 | 0 | 0.16649825  | 0 | -0.02021159  | 0 | 0            |
| 0 | -0.040602179 | 0 | 0            | 0 | 0.10152452  | 0 | 0            | 0 | 0            |
| 0 | -0.044698603 | 0 | -0.035603748 | 0 | 0.11635235  | 0 | 0            | 0 | 0            |
| 0 | -0.052741314 | 0 | -0.052250151 | 0 | 0.11777466  | 0 | 0            | 0 | 0            |
| 0 | -0.047031666 | 0 | -0.050215434 | 0 | 0.12724606  | 0 | 0            | 0 | 0            |
| 0 | -0.03146756  | 0 | 0            | 0 | 0.1163652   | 0 | 0            | 0 | 0            |
| 0 | -0.032456836 | 0 | 0            | 0 | 0.11211205  | 0 | -0.007474407 | 0 | 0            |
| 0 | -0.04853261  | 0 | -0.049839646 | 0 | 0.12096211  | 0 | -0.008600099 | 0 | 0            |
| 0 | -0.05573944  | 0 | -0.049236028 | 0 | 0.11458899  | 0 | 0            | 0 | 0.011023613  |
| 0 | -0.05550937  | 0 | -0.04928434  | 0 | 0.114646    | 0 | 0            | 0 | 0            |
| 0 | 0            | 0 | 0            | 0 | 0.12073286  | 0 | 0            | 0 | -0.028849016 |
| 0 | 0            | 0 | 0            | 0 | 0.1207663   | 0 | 0            | 0 | 0            |
| 0 | 0            | 0 | 0            | 0 | 0.089568372 | 0 | 0            | 0 | 0            |
| 0 | 0            | 0 | 0            | 0 | 0.089540087 | 0 | 0            | 0 | -0.024371208 |
| 0 | -0.041956415 | 0 | 0            | 0 | 0.11317235  | 0 | 0            | 0 | 0            |
| 0 | 0            | 0 | 0            | 0 | 0.14399378  | 0 | 0            | 0 | 0            |
| 0 | -0.040170966 | 0 | 0            | 0 | 0.087826461 | 0 | 0            | 0 | 0            |
| 0 | 0            | 0 | 0            | 0 | 0.13439581  | 0 | -0.02438523  | 0 | 0            |
| 0 | -0.038552249 | 0 | 0            | 0 | 0.094251892 | 0 | 0.004602418  | 0 | 0            |
| 0 | -0.037362186 | 0 | 0            | 0 | 0.096414485 | 0 | 0            | 0 | 0            |
| 0 | -0.037557194 | 0 | 0            | 0 | 0.096346568 | 0 | 0            | 0 | -0.000793216 |
| 0 | 0            | 0 | -0.048572458 | 0 | 0.18686736  | 0 | 0            | 0 | 0            |
| 0 | -0.045759931 | 0 | 0            | 0 | 0.09342743  | 0 | -0.031989768 | 0 | 0            |
| 0 | -0.07073701  | 0 | 0            | 0 | 0.071736591 | 0 | 0            | 0 | 0.038296642  |
| 0 | -0.070291099 | 0 | 0            | 0 | 0.071747258 | 0 | 0            | 0 | 0            |
| 0 | 0            | 0 | -0.00910767  | 0 | 0.12887065  | 0 | 0            | 0 | 0            |
| 0 | 0            | 0 | 0            | 0 | 0.11589314  | 0 | 0            | 0 | 0            |
| 0 | 0            | 0 | 0            | 0 | 0.1158579   | 0 | 0            | 0 | -0.030911804 |
| 0 | -0.056152731 | 0 | -0.052657597 | 0 | 0.14503704  | 0 | 0            | 0 | 0.028373757  |
| 0 | -0.055762294 | 0 | -0.052720002 | 0 | 0.14510559  | 0 | 0            | 0 | 0            |
| 0 | -0.034991556 | 0 | -0.041083228 | 0 | 0.15164358  | 0 | 0            | 0 | 0            |
| 0 | 0            | 0 | 0            | 0 | 0.13727392  | 0 | 0            | 0 | 0            |
| 0 | 0            | 0 | 0            | 0 | 0.13727063  | 0 | 0            | 0 | -0.015948723 |

|   |              |   |              |   |             |   |              |              |
|---|--------------|---|--------------|---|-------------|---|--------------|--------------|
| 0 | 0            | 0 | -0.022454971 | 0 | 0.1256757   | 0 | 0            | 0            |
| 0 | 0            | 0 | -0.02249786  | 0 | 0.12565227  | 0 | 0            | -0.035857646 |
| 0 | 0            | 0 | -0.051431864 | 0 | 0.1613195   | 0 | 0            | -0.044438639 |
| 0 | 0            | 0 | -0.051382292 | 0 | 0.1613154   | 0 | 0            | 0            |
| 0 | -0.035860424 | 0 | -0.055764445 | 0 | 0.16941234  | 0 | 0            | 0            |
| 0 | -0.038392173 | 0 | -0.054683888 | 0 | 0.15721324  | 0 | -0.012290243 | 0            |
| 0 | 0            | 0 | 0            | 0 | 0.13689459  | 0 | -0.005741612 | 0            |
| 0 | 0            | 0 | 0            | 0 | 0.12364617  | 0 | -0.018951901 | 0            |
| 0 | 0            | 0 | 0            | 0 | 0.12356361  | 0 | -0.018845992 | -0.014623841 |
| 0 | 0            | 0 | 0            | 0 | 0.11587429  | 0 | 0            | 0            |
| 0 | 0            | 0 | 0            | 0 | 0.11584048  | 0 | 0            | -0.03465943  |
| 0 | 0            | 0 | 0            | 0 | 0.11383988  | 0 | -0.007210286 | 0            |
| 0 | 0            | 0 | 0            | 0 | 0.11370054  | 0 | -0.006947746 | -0.033983295 |
| 0 | 0            | 0 | 0            | 0 | 0.11120891  | 0 | 0            | -0.0109473   |
| 0 | -0.04165776  | 0 | 0            | 0 | 0.10021819  | 0 | 0            | 0            |
| 0 | 0            | 0 | 0            | 0 | 0.1415125   | 0 | 0            | -0.033397021 |
| 0 | 0            | 0 | 0            | 0 | 0.14150407  | 0 | 0            | 0            |
| 0 | -0.062817357 | 0 | 0            | 0 | 0.071906333 | 0 | 0            | 0.028792826  |
| 0 | -0.062423793 | 0 | 0            | 0 | 0.071921651 | 0 | 0            | 0            |
| 0 | -0.089627412 | 0 | 0            | 0 | 0           | 0 | 0            | 0.063598893  |
| 0 | -0.044247226 | 0 | 0            | 0 | 0.087074715 | 0 | -0.022228199 | 0            |
| 0 | 0            | 0 | 0            | 0 | 0.10977817  | 0 | 0            | 0.007661589  |
| 0 | -0.08908355  | 0 | 0            | 0 | 0           | 0 | 0            | 0            |
| 0 | 0            | 0 | 0            | 0 | 0.13047764  | 0 | 0            | 0            |
| 0 | 0            | 0 | 0            | 0 | 0.12548881  | 0 | -0.015580259 | 0            |
| 0 | 0            | 0 | -0.012221034 | 0 | 0.12606536  | 0 | 0            | 0            |
| 0 | 0            | 0 | -0.043892243 | 0 | 0.15262461  | 0 | -0.041690614 | 0            |
| 0 | -0.038439893 | 0 | 0            | 0 | 0.12781835  | 0 | 0            | 0.020711445  |
| 0 | -0.038051676 | 0 | 0            | 0 | 0.12791292  | 0 | 0            | 0            |
| 0 | 0            | 0 | -0.0482444   | 0 | 0.14150621  | 0 | -0.027156565 | 0            |
| 0 | 0            | 0 | -0.048244642 | 0 | 0.14132785  | 0 | -0.02688497  | -0.038584142 |
| 0 | -0.051931186 | 0 | 0            | 0 | 0.076842613 | 0 | -0.006882362 | 0.015667667  |
| 0 | -0.051579175 | 0 | 0            | 0 | 0.07691546  | 0 | -0.006964043 | 0            |
| 0 | -0.050754524 | 0 | 0            | 0 | 0.078703995 | 0 | 0            | 0.0142022    |
| 0 | -0.05028259  | 0 | 0            | 0 | 0.079026635 | 0 | 0            | 0            |
| 0 | -0.055039999 | 0 | 0            | 0 | 0.072472143 | 0 | 0            | 0.043165241  |
| 0 | -0.027992544 | 0 | 0            | 0 | 0.12392979  | 0 | 0            | 0            |
| 0 | -0.041680485 | 0 | 0            | 0 | 0.085402164 | 0 | -0.005521113 | 0            |
| 0 | 0            | 0 | -0.045667148 | 0 | 0.17080035  | 0 | 0            | 0            |
| 0 | -0.026443874 | 0 | 0            | 0 | 0.13061612  | 0 | 0.000868923  | 0            |
| 0 | 0            | 0 | -0.020285827 | 0 | 0.13132131  | 0 | 0            | 0            |
| 0 | 0            | 0 | -0.017911146 | 0 | 0.12713798  | 0 | -0.006383404 | 0            |
| 0 | 0            | 0 | -0.049419032 | 0 | 0.12944898  | 0 | 0            | -0.031842726 |
| 0 | 0            | 0 | -0.049382815 | 0 | 0.12946348  | 0 | 0            | 0            |
| 0 | 0            | 0 | -0.054974755 | 0 | 0.19282172  | 0 | 0            | 0            |
| 0 | 0            | 0 | -0.055000871 | 0 | 0.19284816  | 0 | 0            | -0.026301771 |
| 0 | -0.07066501  | 0 | 0            | 0 | 0           | 0 | 0            | 0            |

|   |              |   |              |   |            |   |              |              |
|---|--------------|---|--------------|---|------------|---|--------------|--------------|
| 0 | 0            | 0 | -0.028438471 | 0 | 0.15445994 | 0 | 0            | 0            |
| 0 | 0            | 0 | -0.028451656 | 0 | 0.15445593 | 0 | 0            | -0.020084684 |
| 0 | 0            | 0 | 0            | 0 | 0.14073538 | 0 | -0.015956072 | 0            |
| 0 | 0            | 0 | 0            | 0 | 0.11342751 | 0 | -0.004259091 | 0            |
| 0 | -0.047168108 | 0 | -0.051060189 | 0 | 0.14516819 | 0 | 0            | 0.018820196  |
| 0 | -0.046829882 | 0 | -0.051115525 | 0 | 0.14523405 | 0 | 0            | 0            |
| 0 | -0.033292331 | 0 | -0.043738119 | 0 | 0.14945662 | 0 | 0            | 0            |
| 0 | 0            | 0 | -0.032281006 | 0 | 0.17173164 | 0 | 0            | 0            |
| 0 | -0.035491763 | 0 | -0.052811137 | 0 | 0.15366062 | 0 | 0            | 0            |
| 0 | 0            | 0 | -0.04842703  | 0 | 0.12731984 | 0 | 0            | -0.034209792 |
| 0 | 0            | 0 | -0.048392517 | 0 | 0.1273371  | 0 | 0            | 0            |
| 0 | 0            | 0 | -0.048345344 | 0 | 0.12716485 | 0 | 0            | -0.017038517 |
| 0 | -0.036506551 | 0 | -0.052524477 | 0 | 0.14908766 | 0 | -0.00246983  | 0            |
| 0 | 0            | 0 | -0.02645236  | 0 | 0.16009451 | 0 | -0.012154685 | 0            |
| 0 | 0            | 0 | 0            | 0 | 0.12871622 | 0 | 0            | -0.03385473  |
| 0 | 0            | 0 | 0            | 0 | 0.12871043 | 0 | 0            | 0            |
| 0 | 0            | 0 | -0.042267667 | 0 | 0.15001002 | 0 | -0.002989552 | 0            |
| 0 | 0            | 0 | 0            | 0 | 0.1118188  | 0 | -0.044176339 | 0            |
| 0 | 0            | 0 | 0            | 0 | 0.11168694 | 0 | -0.043942641 | -0.026993071 |
| 0 | 0            | 0 | 0            | 0 | 0.14210331 | 0 | -0.006536992 | 0            |
| 0 | 0            | 0 | 0            | 0 | 0.14202976 | 0 | -0.00641566  | -0.015199114 |
| 0 | 0            | 0 | -0.042180638 | 0 | 0.14413742 | 0 | -0.03167674  | 0            |
| 0 | 0            | 0 | 0            | 0 | 0.14271389 | 0 | 0            | 0            |
| 0 | 0            | 0 | 0            | 0 | 0.14271021 | 0 | 0            | -0.015466017 |
| 0 | 0            | 0 | 0            | 0 | 0.13856955 | 0 | 0            | 0.004640097  |
| 0 | 0            | 0 | -0.049320448 | 0 | 0.1864471  | 0 | -0.005321162 | 0            |
| 0 | 0            | 0 | -0.051135048 | 0 | 0.16768308 | 0 | -0.025742572 | 0            |
| 0 | 0            | 0 | -0.051113945 | 0 | 0.16752814 | 0 | -0.025571075 | -0.023660682 |
| 0 | 0            | 0 | 0            | 0 | 0.14239845 | 0 | -0.006254691 | 0            |
| 0 | -0.089055821 | 0 | 0            | 0 | 0          | 0 | 0            | 0.063701971  |
| 0 | -0.047966883 | 0 | -0.04786277  | 0 | 0.12337402 | 0 | 0            | 0.019369731  |
| 0 | -0.033645292 | 0 | -0.039249884 | 0 | 0.12654618 | 0 | 0            | 0            |
| 0 | -0.047351772 | 0 | -0.047939014 | 0 | 0.1238615  | 0 | 0            | 0            |
| 0 | -0.1074621   | 0 | 0            | 0 | 0          | 0 | 0            | 0.089112862  |
| 0 | -0.040600076 | 0 | -0.049351737 | 0 | 0.13569433 | 0 | 0.014785755  | 0.011035599  |
| 0 | -0.040396179 | 0 | -0.049394822 | 0 | 0.13576201 | 0 | 0.014750517  | 0            |
| 0 | -0.03259801  | 0 | -0.045272664 | 0 | 0.13807748 | 0 | 0.014900489  | 0            |
| 0 | -0.035655688 | 0 | -0.050106617 | 0 | 0.13459469 | 0 | 0.006279137  | 0            |
| 0 | -0.10647957  | 0 | 0            | 0 | 0          | 0 | 0            | 0            |
| 0 | 0            | 0 | 0            | 0 | 0.11431394 | 0 | -0.006555617 | 0            |
| 0 | 0            | 0 | 0            | 0 | 0.1142802  | 0 | -0.006138821 | -0.034352032 |
| 0 | -0.0515657   | 0 | 0            | 0 | 0.10494229 | 0 | -0.005996946 | 0.033380254  |
| 0 | 0            | 0 | 0            | 0 | 0.11435977 | 0 | 0            | -0.01455363  |
| 0 | -0.02803859  | 0 | 0            | 0 | 0.11072105 | 0 | 0            | 0            |
| 0 | -0.05109864  | 0 | 0            | 0 | 0.10490943 | 0 | -0.005927723 | 0            |
| 0 | -0.052406571 | 0 | 0            | 0 | 0.10307148 | 0 | 0            | 0.034038676  |
| 0 | -0.053898528 | 0 | 0            | 0 | 0.10032418 | 0 | 0            | 0.057016937  |

|   |              |   |              |   |             |   |              |   |              |
|---|--------------|---|--------------|---|-------------|---|--------------|---|--------------|
| 0 | -0.051690794 | 0 | 0            | 0 | 0.10357589  | 0 | 0            | 0 | 0            |
| 0 | -0.097835065 | 0 | 0            | 0 | 0           | 0 | 0            | 0 | 0.061996046  |
| 0 | -0.032124284 | 0 | -0.0491895   | 0 | 0.14761602  | 0 | 0            | 0 | 0.033892307  |
| 0 | -0.032417545 | 0 | -0.04956914  | 0 | 0.14748649  | 0 | 0            | 0 | 0.002938713  |
| 0 | -0.032130978 | 0 | -0.04953382  | 0 | 0.14756011  | 0 | 0            | 0 | 0            |
| 0 | -0.09718998  | 0 | 0            | 0 | 0           | 0 | 0            | 0 | 0            |
| 0 | -0.031679672 | 0 | 0            | 0 | 0.12541111  | 0 | 0            | 0 | 0.013012276  |
| 0 | -0.031330767 | 0 | 0            | 0 | 0.12550169  | 0 | 0            | 0 | 0            |
| 0 | -0.025373429 | 0 | 0            | 0 | 0.12228586  | 0 | 0.009169317  | 0 | 0            |
| 0 | 0            | 0 | -0.050274486 | 0 | 0.14796001  | 0 | 0            | 0 | -0.006365261 |
| 0 | 0            | 0 | -0.032477635 | 0 | 0.15273743  | 0 | 0            | 0 | 0            |
| 0 | 0            | 0 | -0.032487594 | 0 | 0.15272989  | 0 | 0            | 0 | -0.022116931 |
| 0 | -0.046327234 | 0 | 0            | 0 | 0.082043701 | 0 | 0            | 0 | 0.027296247  |
| 0 | 0            | 0 | 0            | 0 | 0.10498293  | 0 | -0.034587433 | 0 | 0            |
| 0 | 0            | 0 | 0            | 0 | 0.10484142  | 0 | -0.034351796 | 0 | -0.028692835 |
| 0 | -0.045531561 | 0 | 0            | 0 | 0.082598418 | 0 | 0            | 0 | 0            |
| 0 | 0            | 0 | -0.052201099 | 0 | 0.17727777  | 0 | 0            | 0 | 0            |
| 0 | 0            | 0 | -0.052220365 | 0 | 0.17729569  | 0 | 0            | 0 | -0.026567586 |
| 0 | -0.029936342 | 0 | 0            | 0 | 0.11942949  | 0 | -0.006315487 | 0 | 0            |
| 0 | 0            | 0 | 0            | 0 | 0.12760696  | 0 | -0.011853007 | 0 | 0            |
| 0 | 0            | 0 | 0            | 0 | 0.1001611   | 0 | -0.027351717 | 0 | 0.015416032  |
| 0 | -0.028479068 | 0 | 0            | 0 | 0.095340228 | 0 | 0.004184291  | 0 | 0            |
| 0 | 0            | 0 | -0.029739885 | 0 | 0.15624793  | 0 | 0            | 0 | 0            |
| 0 | 0            | 0 | -0.027759394 | 0 | 0.15227197  | 0 | -0.003846052 | 0 | 0            |
| 0 | 0            | 0 | -0.049710413 | 0 | 0.15975645  | 0 | -0.015522942 | 0 | 0            |
| 0 | 0            | 0 | -0.049698655 | 0 | 0.15960407  | 0 | -0.015344819 | 0 | -0.024805953 |
| 0 | 0            | 0 | -0.036611043 | 0 | 0.14796153  | 0 | 0.005863894  | 0 | 0            |
| 0 | 0            | 0 | -0.036570576 | 0 | 0.14782787  | 0 | 0.006053813  | 0 | -0.024457292 |
| 0 | 0            | 0 | -0.035657048 | 0 | 0.14653061  | 0 | 0            | 0 | 0            |
| 0 | 0            | 0 | -0.035664252 | 0 | 0.14650399  | 0 | 0            | 0 | -0.024061424 |
| 0 | 0            | 0 | -0.038727369 | 0 | 0.15190537  | 0 | 0            | 0 | 0.00361787   |
| 0 | -0.073415981 | 0 | 0            | 0 | 0           | 0 | 0.040732428  | 0 | 0            |
| 0 | 0            | 0 | 0            | 0 | 0.12974447  | 0 | 0            | 0 | 0            |
| 0 | 0            | 0 | 0            | 0 | 0.12973898  | 0 | 0            | 0 | -0.016268767 |
| 0 | 0            | 0 | 0            | 0 | 0.13344843  | 0 | 0.001974088  | 0 | 0            |
| 0 | 0            | 0 | 0            | 0 | 0.13450461  | 0 | 0            | 0 | 0.00742748   |
| 0 | 0            | 0 | 0            | 0 | 0.13336852  | 0 | 0.002105825  | 0 | -0.016565594 |
| 0 | 0            | 0 | -0.049281395 | 0 | 0.1480776   | 0 | 0            | 0 | -0.003218029 |
| 0 | 0            | 0 | 0            | 0 | 0.0868028   | 0 | 0            | 0 | -0.008434185 |
| 0 | 0            | 0 | -0.049563773 | 0 | 0.15866197  | 0 | 0.005077468  | 0 | 0            |
| 0 | 0            | 0 | -0.049595162 | 0 | 0.15866202  | 0 | 0.005409514  | 0 | -0.027100235 |
| 0 | 0            | 0 | -0.046614786 | 0 | 0.17070201  | 0 | -0.001607905 | 0 | 0            |
| 0 | 0            | 0 | -0.049270061 | 0 | 0.15834311  | 0 | 0            | 0 | 0.000162457  |
| 0 | -0.029176501 | 0 | 0            | 0 | 0.10793049  | 0 | 0.024855444  | 0 | 0.008580989  |
| 0 | -0.029021187 | 0 | 0            | 0 | 0.10797321  | 0 | 0.024859706  | 0 | 0            |
| 0 | -0.055488225 | 0 | 0.032051158  | 0 | 0           | 0 | 0            | 0 | 0            |
| 0 | 0            | 0 | -0.048609382 | 0 | 0.15199211  | 0 | -0.003994551 | 0 | 0.004035054  |

|   |              |   |              |   |             |   |              |              |
|---|--------------|---|--------------|---|-------------|---|--------------|--------------|
| 0 | -0.10708697  | 0 | 0            | 0 | 0           | 0 | 0            | 0.071778804  |
| 0 | 0            | 0 | 0            | 0 | 0.12911382  | 0 | -0.002448211 | 0            |
| 0 | -0.10636012  | 0 | 0            | 0 | 0           | 0 | 0            | 0            |
| 0 | 0            | 0 | 0            | 0 | 0.085589107 | 0 | 0            | -0.00713346  |
| 0 | -0.050942535 | 0 | 0            | 0 | 0.091299435 | 0 | 0            | 0.031870653  |
| 0 | -0.050198389 | 0 | 0            | 0 | 0.091830571 | 0 | 0            | 0            |
| 0 | -0.045254142 | 0 | 0            | 0 | 0.10179728  | 0 | 0            | 0.051408858  |
| 0 | -0.046145204 | 0 | 0            | 0 | 0.10001628  | 0 | 0.002311003  | 0.026915034  |
| 0 | -0.045757062 | 0 | 0            | 0 | 0.099998122 | 0 | 0.002359523  | 0            |
| 0 | 0            | 0 | -0.026867824 | 0 | 0.13714823  | 0 | 0.003740832  | 0            |
| 0 | 0            | 0 | 0            | 0 | 0.1147045   | 0 | 0.003193717  | 0            |
| 0 | 0            | 0 | 0            | 0 | 0.11468002  | 0 | 0.003400052  | -0.017189256 |
| 0 | 0            | 0 | 0            | 0 | 0.11467963  | 0 | 0            | 0.013425641  |
| 0 | 0            | 0 | 0            | 0 | 0.13941062  | 0 | -0.007486262 | 0            |
| 0 | 0            | 0 | 0            | 0 | 0.13939417  | 0 | -0.007295335 | -0.016047768 |
| 0 | -0.065710465 | 0 | 0.028781724  | 0 | 0           | 0 | 0            | 0            |
| 0 | 0            | 0 | 0            | 0 | 0.1389452   | 0 | 0            | 0.001413004  |
| 0 | -0.10219348  | 0 | -0.005439571 | 0 | 0           | 0 | 0            | 0.065378458  |
| 0 | -0.099203603 | 0 | 0            | 0 | 0           | 0 | -0.005416081 | 0.063434331  |
| 0 | -0.099303709 | 0 | 0            | 0 | 0           | 0 | 0            | 0.084325939  |
| 0 | -0.09987405  | 0 | 0            | 0 | 0           | 0 | 0            | 0.064106358  |
| 0 | -0.10145733  | 0 | -0.005295252 | 0 | 0           | 0 | 0            | 0            |
| 0 | -0.01882615  | 0 | 0            | 0 | 0.12281569  | 0 | 0            | 0.032300374  |
| 0 | -0.098537713 | 0 | 0            | 0 | 0           | 0 | -0.004667877 | 0            |
| 0 | -0.099182833 | 0 | 0            | 0 | 0           | 0 | 0            | 0            |
| 0 | -0.029989958 | 0 | 0            | 0 | 0.10652843  | 0 | -0.002464559 | 0            |
| 0 | 0            | 0 | 0            | 0 | 0.12226318  | 0 | 0.014809837  | -0.001434688 |
| 0 | -0.082355868 | 0 | 0            | 0 | 0           | 0 | 0            | 0.058774595  |
| 0 | -0.050327601 | 0 | 0            | 0 | 0.078045045 | 0 | 0            | 0.062276482  |
| 0 | -0.050320423 | 0 | 0            | 0 | 0.078028181 | 0 | 0.001692182  | 0.030492517  |
| 0 | -0.049552508 | 0 | 0            | 0 | 0.078563021 | 0 | 0.002059695  | 0            |
| 0 | 0            | 0 | 0            | 0 | 0.12300268  | 0 | -0.024295592 | 0.026547703  |
| 0 | -0.1059988   | 0 | 0            | 0 | 0           | 0 | 0            | 0.051864253  |
| 0 | -0.10554036  | 0 | 0            | 0 | 0           | 0 | 0            | 0            |
| 0 | -0.066048148 | 0 | 0            | 0 | 0           | 0 | 0            | 0            |
| 0 | -0.039583275 | 0 | 0            | 0 | 0.093934952 | 0 | 0.014197299  | 0.037387336  |
| 0 | -0.069096598 | 0 | 0            | 0 | 0           | 0 | 0            | 0            |
| 0 | -0.067540009 | 0 | 0            | 0 | 0           | 0 | -0.003826031 | 0            |
| 0 | -0.057965025 | 0 | 0            | 0 | 0           | 0 | 0            | 0            |
| 0 | 0            | 0 | 0            | 0 | 0.12678443  | 0 | -0.003665702 | 0            |
| 0 | 0            | 0 | 0            | 0 | 0.12676703  | 0 | -0.003464443 | -0.016909093 |
| 0 | 0            | 0 | 0            | 0 | 0.12655922  | 0 | 0            | 0.005374623  |
| 0 | 0            | 0 | 0            | 0 | 0.11649118  | 0 | -0.014342823 | 0.02031394   |
| 0 | -0.077140624 | 0 | 0            | 0 | 0           | 0 | 0            | 0            |
| 0 | -0.10467664  | 0 | 0            | 0 | 0           | 0 | 0            | 0.086917317  |
| 0 | 0            | 0 | 0            | 0 | 0.11336996  | 0 | 0.000670581  | 0.009544538  |
| 0 | -0.086145022 | 0 | 0.019466947  | 0 | 0           | 0 | 0            | 0.071371628  |

|   |              |   |              |   |   |              |   |              |
|---|--------------|---|--------------|---|---|--------------|---|--------------|
| 0 | -0.10373414  | 0 | 0            | 0 | 0 | 0            | 0 | 0            |
| 0 | -0.08520611  | 0 | 0.019729872  | 0 | 0 | 0            | 0 | 0            |
| 0 | -0.10464695  | 0 | 0            | 0 | 0 | 0.041124121  | 0 | 0.061226009  |
| 0 | -0.10436533  | 0 | 0            | 0 | 0 | 0.041318862  | 0 | 0            |
| 0 | -0.066529469 | 0 | 0            | 0 | 0 | -0.003800804 | 0 | 0            |
| 0 | -0.065969261 | 0 | 0.001613284  | 0 | 0 | 0            | 0 | 0            |
| 0 | -0.097111754 | 0 | 0            | 0 | 0 | 0.003610875  | 0 | 0.07853338   |
| 0 | -0.097104841 | 0 | 0            | 0 | 0 | 0            | 0 | 0.10918356   |
| 0 | -0.097547324 | 0 | 0            | 0 | 0 | 0            | 0 | 0.079115053  |
| 0 | -0.069517491 | 0 | 0            | 0 | 0 | -0.007062189 | 0 | 0            |
| 0 | -0.067980003 | 0 | 0.00453752   | 0 | 0 | 0            | 0 | 0            |
| 0 | -0.066959391 | 0 | 0.003556486  | 0 | 0 | -0.006045608 | 0 | 0            |
| 0 | -0.09631646  | 0 | 0            | 0 | 0 | 0.004568234  | 0 | 0            |
| 0 | -0.09664675  | 0 | 0            | 0 | 0 | 0            | 0 | 0            |
| 0 | -0.057122086 | 0 | 0.005163267  | 0 | 0 | 0            | 0 | 0            |
| 0 | -0.058786933 | 0 | 0            | 0 | 0 | 0.005263356  | 0 | 0            |
| 0 | -0.089563202 | 0 | 0.011682065  | 0 | 0 | 0.039924377  | 0 | 0.048456546  |
| 0 | -0.08941515  | 0 | 0.011555172  | 0 | 0 | 0.040127435  | 0 | 0            |
| 0 | -0.056001571 | 0 | 0.037267465  | 0 | 0 | 0.042479311  | 0 | 0            |
| 0 | -0.09456412  | 0 | 0            | 0 | 0 | 0.052687549  | 0 | 0            |
| 0 | -0.094708697 | 0 | 0            | 0 | 0 | 0.052417781  | 0 | 0.049630076  |
| 0 | -0.097125859 | 0 | 0            | 0 | 0 | 0.045816848  | 0 | 0            |
| 0 | -0.097342323 | 0 | 0            | 0 | 0 | 0.045642894  | 0 | 0.05327923   |
| 0 | -0.095382034 | 0 | 0            | 0 | 0 | 0.047108295  | 0 | 0.022654368  |
| 0 | -0.092067054 | 0 | 0.027749522  | 0 | 0 | 0            | 0 | 0.051141452  |
| 0 | -0.091600462 | 0 | 0.027718068  | 0 | 0 | 0            | 0 | 0            |
| 0 | 0            | 0 | 0.061025396  | 0 | 0 | 0            | 0 | 0            |
| 0 | -0.10643761  | 0 | -0.002135036 | 0 | 0 | 0            | 0 | 0.087520717  |
| 0 | -0.105437    | 0 | 0            | 0 | 0 | 0            | 0 | 0.11116926   |
| 0 | -0.10546721  | 0 | 0            | 0 | 0 | -0.001732284 | 0 | 0.086995979  |
| 0 | -0.10541764  | 0 | -0.001960134 | 0 | 0 | 0            | 0 | 0            |
| 0 | -0.1045008   | 0 | 0            | 0 | 0 | -0.000619121 | 0 | 0            |
| 0 | -0.057474587 | 0 | 0.051471329  | 0 | 0 | 0            | 0 | 0            |
| 0 | -0.10071789  | 0 | -0.004266852 | 0 | 0 | 0            | 0 | 0.10934864   |
| 0 | -0.10075638  | 0 | -0.004354891 | 0 | 0 | 0.002044733  | 0 | 0.080756078  |
| 0 | -0.10051648  | 0 | -0.004347751 | 0 | 0 | 0            | 0 | 0.080557002  |
| 0 | -0.098450486 | 0 | 0            | 0 | 0 | 0.001330167  | 0 | 0.10675959   |
| 0 | -0.098464995 | 0 | 0            | 0 | 0 | 0            | 0 | 0.10807567   |
| 0 | -0.098404508 | 0 | 0            | 0 | 0 | 0.001672187  | 0 | 0.079184496  |
| 0 | -0.099868601 | 0 | -0.004207525 | 0 | 0 | 0.003014926  | 0 | 0            |
| 0 | -0.099532227 | 0 | -0.004173937 | 0 | 0 | 0            | 0 | 0            |
| 0 | -0.097508909 | 0 | 0            | 0 | 0 | 0.002685378  | 0 | 0            |
| 0 | -0.066022801 | 0 | 0.01718217   | 0 | 0 | 0.025467711  | 0 | 0            |
| 0 | 0            | 0 | 0.060862068  | 0 | 0 | 0            | 0 | 0            |
| 0 | -0.063836709 | 0 | 0.01515427   | 0 | 0 | 0.031796524  | 0 | 0            |
| 0 | 0            | 0 | 0.060836928  | 0 | 0 | 0            | 0 | -0.019129247 |
| 0 | -0.072451116 | 0 | 0            | 0 | 0 | 0.044328556  | 0 | 0            |

|   |              |   |             |   |   |              |   |              |
|---|--------------|---|-------------|---|---|--------------|---|--------------|
| 0 | 0            | 0 | 0           | 0 | 0 | 0            | 0 | -0.02424875  |
| 0 | -0.084326925 | 0 | 0.02843617  | 0 | 0 | 0            | 0 | 0.042154734  |
| 0 | -0.069500318 | 0 | 0           | 0 | 0 | 0.048607902  | 0 | 0            |
| 0 | -0.083903172 | 0 | 0.02841179  | 0 | 0 | 0            | 0 | 0            |
| 0 | 0            | 0 | 0.066518141 | 0 | 0 | 0            | 0 | 0            |
| 0 | 0            | 0 | 0.060880962 | 0 | 0 | 0            | 0 | 0            |
| 0 | 0            | 0 | 0.063047127 | 0 | 0 | -0.008430751 | 0 | 0            |
| 0 | 0            | 0 | 0           | 0 | 0 | 0            | 0 | 0            |
| 0 | -0.06991484  | 0 | 0.038830668 | 0 | 0 | 0            | 0 | 0.026846993  |
| 0 | -0.069558085 | 0 | 0.038912677 | 0 | 0 | 0            | 0 | 0            |
| 0 | 0            | 0 | 0.082183823 | 0 | 0 | 0            | 0 | 0            |
| 0 | -0.055993945 | 0 | 0.047543529 | 0 | 0 | 0            | 0 | 0            |
| 0 | -0.10492399  | 0 | 0           | 0 | 0 | 0            | 0 | 0.055094457  |
| 0 | -0.076123472 | 0 | 0.029319938 | 0 | 0 | 0            | 0 | 0.047751328  |
| 0 | -0.10443639  | 0 | 0           | 0 | 0 | 0            | 0 | 0            |
| 0 | -0.044712443 | 0 | 0.03782494  | 0 | 0 | 0            | 0 | 0            |
| 0 | -0.043664139 | 0 | 0.032882164 | 0 | 0 | 0            | 0 | 0            |
| 0 | -0.044105541 | 0 | 0.034560472 | 0 | 0 | 0.002792415  | 0 | 0            |
| 0 | -0.10427511  | 0 | 0           | 0 | 0 | 0            | 0 | 0.053433202  |
| 0 | 0            | 0 | 0.027576127 | 0 | 0 | 0            | 0 | 0            |
| 0 | -0.10116588  | 0 | 0           | 0 | 0 | 0.096684542  | 0 | 0            |
| 0 | -0.10126885  | 0 | 0           | 0 | 0 | 0.096536093  | 0 | 0.078209723  |
| 0 | -0.097708604 | 0 | 0           | 0 | 0 | 0            | 0 | 0.046967788  |
| 0 | -0.097262999 | 0 | 0           | 0 | 0 | 0            | 0 | 0            |
| 0 | 0            | 0 | 0           | 0 | 0 | 0            | 0 | -0.028342766 |
| 0 | 0            | 0 | 0           | 0 | 0 | 0            | 0 | 0            |
| 0 | -0.054634952 | 0 | 0           | 0 | 0 | 0.007431647  | 0 | 0            |
| 0 | -0.091027624 | 0 | 0           | 0 | 0 | 0            | 0 | 0.050659318  |
| 0 | -0.057216271 | 0 | 0           | 0 | 0 | 0.004476772  | 0 | 0            |
| 0 | -0.096821224 | 0 | 0           | 0 | 0 | 0            | 0 | 0.047954113  |
| 0 | 0            | 0 | 0.04398955  | 0 | 0 | 0            | 0 | -0.029253579 |
| 0 | 0            | 0 | 0.044037087 | 0 | 0 | 0            | 0 | 0            |
| 0 | 0            | 0 | 0.038794757 | 0 | 0 | 0.02424187   | 0 | 0            |
| 0 | 0            | 0 | 0           | 0 | 0 | -0.003039496 | 0 | 0            |
| 0 | 0            | 0 | 0.06536015  | 0 | 0 | 0.037583026  | 0 | -0.026276362 |
| 0 | 0            | 0 | 0.065456502 | 0 | 0 | 0.037461501  | 0 | 0            |
| 0 | -0.054055057 | 0 | 0.004353397 | 0 | 0 | 0.005078031  | 0 | 0            |
| 0 | 0            | 0 | 0.074105514 | 0 | 0 | 0.035235237  | 0 | 0            |
| 0 | -0.04926672  | 0 | 0.029471121 | 0 | 0 | 0.071551083  | 0 | 0            |
| 0 | -0.055612134 | 0 | 0.007420424 | 0 | 0 | 0.00175785   | 0 | 0            |
| 0 | 0            | 0 | 0           | 0 | 0 | 0            | 0 | 0            |
| 0 | 0            | 0 | 0           | 0 | 0 | 0            | 0 | -0.011139806 |
| 0 | 0            | 0 | 0           | 0 | 0 | 0.006243862  | 0 | 0            |
| 0 | 0            | 0 | 0.068585632 | 0 | 0 | 0.040281226  | 0 | 0            |
| 0 | 0            | 0 | 0.056139169 | 0 | 0 | 0            | 0 | 0            |
| 0 | 0            | 0 | 0.056164993 | 0 | 0 | 0            | 0 | -0.00306165  |
| 0 | 0            | 0 | 0.056591928 | 0 | 0 | 0.001082221  | 0 | 0            |



|   |              |   |             |   |   |              |   |              |
|---|--------------|---|-------------|---|---|--------------|---|--------------|
| 0 | 0            | 0 | 0.076952602 | 0 | 0 | 0            | 0 | -0.027089143 |
| 0 | 0            | 0 | 0.077001983 | 0 | 0 | 0            | 0 | 0            |
| 0 | 0            | 0 | 0.062106606 | 0 | 0 | -0.002345383 | 0 | 0            |
| 0 | 0            | 0 | 0.061806417 | 0 | 0 | 0            | 0 | -0.001138072 |
| 0 | 0            | 0 | 0.061781863 | 0 | 0 | 0            | 0 | 0            |
| 0 | 0            | 0 | 0           | 0 | 0 | 0            | 0 | -0.028977118 |
| 0 | 0            | 0 | 0           | 0 | 0 | 0            | 0 | 0            |
| 0 | 0            | 0 | 0.059495748 | 0 | 0 | 0            | 0 | 0.022736154  |
| 0 | 0            | 0 | 0.059463582 | 0 | 0 | -0.000815475 | 0 | 0            |
| 0 | 0            | 0 | 0.059481637 | 0 | 0 | -0.000798765 | 0 | -0.001920508 |
| 0 | 0            | 0 | 0           | 0 | 0 | 0.045020413  | 0 | -0.036201334 |
| 0 | 0            | 0 | 0           | 0 | 0 | 0.044965174  | 0 | 0            |
| 0 | 0            | 0 | 0.025553959 | 0 | 0 | 0            | 0 | 0            |
| 0 | 0            | 0 | 0.025561819 | 0 | 0 | 0            | 0 | -0.008027397 |
| 0 | 0            | 0 | 0.026366754 | 0 | 0 | 0.000794113  | 0 | 0            |
| 0 | 0            | 0 | 0.072140022 | 0 | 0 | 0            | 0 | -0.029418882 |
| 0 | 0            | 0 | 0.072189635 | 0 | 0 | 0            | 0 | 0            |
| 0 | 0            | 0 | 0.069778182 | 0 | 0 | 0            | 0 | -0.019852898 |
| 0 | 0            | 0 | 0           | 0 | 0 | 0            | 0 | -0.028130896 |
| 0 | 0            | 0 | 0           | 0 | 0 | 0            | 0 | 0            |
| 0 | 0            | 0 | 0           | 0 | 0 | -0.000590296 | 0 | 0            |
| 0 | 0            | 0 | 0.02341623  | 0 | 0 | 0            | 0 | 0            |
| 0 | 0            | 0 | 0.023401426 | 0 | 0 | 0            | 0 | -0.025271266 |
| 0 | -0.088430302 | 0 | 0.025493356 | 0 | 0 | 0.070888999  | 0 | 0            |
| 0 | -0.058701526 | 0 | 0           | 0 | 0 | 0.089484613  | 0 | 0            |
| 0 | -0.088553037 | 0 | 0.025724585 | 0 | 0 | 0.070582826  | 0 | 0.071199924  |
| 0 | 0            | 0 | 0           | 0 | 0 | -0.005550019 | 0 | -0.027357367 |
| 0 | 0            | 0 | 0           | 0 | 0 | -0.005881947 | 0 | 0            |
| 0 | 0            | 0 | 0           | 0 | 0 | 0            | 0 | -0.022079989 |
| 0 | 0            | 0 | 0           | 0 | 0 | 0.004799373  | 0 | 0            |
| 0 | 0            | 0 | 0           | 0 | 0 | 0.004944031  | 0 | -0.012129331 |
| 0 | 0            | 0 | 0           | 0 | 0 | 0            | 0 | 0.007888354  |
| 0 | 0            | 0 | 0           | 0 | 0 | 0.057879491  | 0 | 0            |
| 0 | 0            | 0 | 0.028739769 | 0 | 0 | -0.010019394 | 0 | 0            |
| 0 | 0            | 0 | 0.028712268 | 0 | 0 | -0.009735429 | 0 | -0.023197554 |
| 0 | 0            | 0 | 0.026950868 | 0 | 0 | 0            | 0 | -0.023887417 |
| 0 | 0            | 0 | 0.026967532 | 0 | 0 | 0            | 0 | 0            |
| 0 | -0.07501363  | 0 | 0.031113606 | 0 | 0 | 0.082400073  | 0 | 0            |
| 0 | -0.075051087 | 0 | 0.031216956 | 0 | 0 | 0.082100405  | 0 | 0.057566308  |
| 0 | 0            | 0 | 0.028469974 | 0 | 0 | 0            | 0 | -0.015643833 |
| 0 | -0.082281742 | 0 | 0.023919131 | 0 | 0 | 0.075979851  | 0 | 0            |
| 0 | 0            | 0 | 0.026175256 | 0 | 0 | -0.005798235 | 0 | 0            |
| 0 | -0.08234613  | 0 | 0.024132558 | 0 | 0 | 0.075696768  | 0 | 0.063888209  |
| 0 | 0            | 0 | 0           | 0 | 0 | -0.00366934  | 0 | 0            |
| 0 | -0.080055113 | 0 | 0.023291283 | 0 | 0 | 0.078215823  | 0 | 0.014306752  |
| 0 | 0            | 0 | 0           | 0 | 0 | -0.001684566 | 0 | -0.028904332 |
| 0 | 0            | 0 | 0           | 0 | 0 | -0.00203102  | 0 | 0            |

|   |              |   |             |   |   |   |              |              |
|---|--------------|---|-------------|---|---|---|--------------|--------------|
| 0 | 0            | 0 | 0           | 0 | 0 | 0 | 0            | -0.015662394 |
| 0 | 0            | 0 | 0.069602948 | 0 | 0 | 0 | 0.074495801  | 0            |
| 0 | -0.10006645  | 0 | 0           | 0 | 0 | 0 | 0.083956145  | 0            |
| 0 | -0.10025574  | 0 | 0           | 0 | 0 | 0 | 0.083583102  | 0.077419367  |
| 0 | 0            | 0 | 0.033292668 | 0 | 0 | 0 | 0.02367384   | -0.02863486  |
| 0 | 0            | 0 | 0.029768913 | 0 | 0 | 0 | -0.009304072 | 0            |
| 0 | 0            | 0 | 0.033419143 | 0 | 0 | 0 | 0.023528809  | 0            |
| 0 | -0.099615239 | 0 | 0           | 0 | 0 | 0 | 0.090668221  | 0.010901903  |
| 0 | 0            | 0 | 0.03610589  | 0 | 0 | 0 | 0.017546987  | -0.026871813 |
| 0 | 0            | 0 | 0.036250377 | 0 | 0 | 0 | 0.01723648   | -0.036194286 |
| 0 | 0            | 0 | 0.036223748 | 0 | 0 | 0 | 0.017411138  | 0            |
| 0 | -0.093363594 | 0 | 0           | 0 | 0 | 0 | 0.087246145  | 0            |
| 0 | -0.092304207 | 0 | 0           | 0 | 0 | 0 | 0.087868004  | 0.010486954  |
| 0 | -0.0934964   | 0 | 0           | 0 | 0 | 0 | 0.086904081  | 0.06991911   |
| 0 | -0.092774383 | 0 | 0           | 0 | 0 | 0 | 0.094618197  | 0.003840185  |
| 0 | 0            | 0 | 0           | 0 | 0 | 0 | -0.004723447 | -0.028045717 |
| 0 | 0            | 0 | 0           | 0 | 0 | 0 | -0.00506057  | 0            |
| 0 | 0            | 0 | 0.04261806  | 0 | 0 | 0 | 0            | -0.021515039 |
| 0 | 0            | 0 | 0           | 0 | 0 | 0 | 0            | -0.019948273 |
| 0 | 0            | 0 | 0.043046869 | 0 | 0 | 0 | 0            | -0.022950646 |
| 0 | 0            | 0 | 0           | 0 | 0 | 0 | -0.007804198 | -0.015091593 |
| 0 | 0            | 0 | 0           | 0 | 0 | 0 | 0            | -0.043694312 |
| 0 | -0.042202266 | 0 | 0.047481791 | 0 | 0 | 0 | 0.07322765   | 0            |
| 0 | 0            | 0 | 0           | 0 | 0 | 0 | 0            | 0            |
| 0 | 0            | 0 | 0           | 0 | 0 | 0 | 0            | -0.049052604 |
| 0 | -0.041225947 | 0 | 0.042756995 | 0 | 0 | 0 | 0.07754102   | 0            |
| 0 | 0            | 0 | 0           | 0 | 0 | 0 | 0.007127689  | 0            |
| 0 | 0            | 0 | 0           | 0 | 0 | 0 | 0.007278213  | -0.01262115  |
| 0 | 0            | 0 | 0           | 0 | 0 | 0 | 0            | 0.010312951  |
| 0 | 0            | 0 | 0.043918323 | 0 | 0 | 0 | 0.059123406  | -0.00835332  |
| 0 | 0            | 0 | 0.043976051 | 0 | 0 | 0 | 0.059071803  | 0            |
| 0 | 0            | 0 | 0           | 0 | 0 | 0 | 0.052493857  | -0.03784892  |
| 0 | 0            | 0 | 0           | 0 | 0 | 0 | 0.052341953  | 0            |
| 0 | 0            | 0 | 0           | 0 | 0 | 0 | 0.045113558  | -0.071244069 |
| 0 | 0            | 0 | 0.023715806 | 0 | 0 | 0 | 0.002031386  | 0            |
| 0 | 0            | 0 | 0.023830988 | 0 | 0 | 0 | 0            | 0.012865664  |
| 0 | 0            | 0 | 0.023711124 | 0 | 0 | 0 | 0.00214441   | -0.009544348 |
| 0 | 0            | 0 | 0           | 0 | 0 | 0 | 0.004168459  | 0            |
| 0 | 0            | 0 | 0           | 0 | 0 | 0 | 0.004307504  | -0.011638038 |
| 0 | 0            | 0 | 0           | 0 | 0 | 0 | 0            | 0.006442584  |
| 0 | 0            | 0 | 0           | 0 | 0 | 0 | 0.048664978  | -0.036853864 |
| 0 | 0            | 0 | 0           | 0 | 0 | 0 | 0.048520066  | 0            |
| 0 | 0            | 0 | 0           | 0 | 0 | 0 | 0.046514155  | -0.080261741 |
| 0 | 0            | 0 | 0           | 0 | 0 | 0 | 0.001343631  | 0.001526591  |
| 0 | 0            | 0 | 0.0273501   | 0 | 0 | 0 | -0.001348601 | 0            |
| 0 | 0            | 0 | 0.027289894 | 0 | 0 | 0 | 0            | 0.009818516  |
| 0 | 0            | 0 | 0.027351809 | 0 | 0 | 0 | -0.001256528 | -0.007998266 |

|   |              |   |              |   |             |   |              |   |              |
|---|--------------|---|--------------|---|-------------|---|--------------|---|--------------|
| 0 | 0            | 0 | 0            | 0 | 0           | 0 | 0.040724814  | 0 | -0.070643999 |
| 0 | 0            | 0 | 0.029163839  | 0 | 0           | 0 | -0.003113389 | 0 | 0.011457776  |
| 0 | 0            | 0 | 0            | 0 | 0           | 0 | 0.005240027  | 0 | 0.0028888    |
| 0 | -0.064235277 | 0 | 0.07514377   | 0 | 0           | 0 | 0            | 0 | 0.056439545  |
| 0 | -0.063625406 | 0 | 0.075131514  | 0 | 0           | 0 | 0            | 0 | 0            |
| 0 | 0            | 0 | 0.069475437  | 0 | 0           | 0 | 0.068507259  | 0 | -0.004339054 |
| 0 | 0            | 0 | 0.069545159  | 0 | 0           | 0 | 0.068474055  | 0 | 0            |
| 0 | 0            | 0 | 0            | 0 | 0           | 0 | 0.002337726  | 0 | 0.00187827   |
| 0 | 0            | 0 | 0.064053474  | 0 | 0           | 0 | 0.072946917  | 0 | -0.006367954 |
| 0 | 0            | 0 | 0.065398943  | 0 | 0           | 0 | 0.071936496  | 0 | -0.052084791 |
| 0 | 0            | 0 | 0.064129002  | 0 | 0           | 0 | 0.072902149  | 0 | 0            |
| 0 | 0            | 0 | 0            | 0 | 0           | 0 | 0            | 0 | -0.043429402 |
| 0 | -0.035833055 | 0 | 0.068548565  | 0 | 0           | 0 | 0            | 0 | 0            |
| 0 | 0            | 0 | 0            | 0 | 0           | 0 | 0            | 0 | -0.046065404 |
| 0 | 0            | 0 | 0            | 0 | 0           | 0 | 0.092717712  | 0 | -0.088365626 |
| 0 | 0            | 0 | 0            | 0 | 0           | 0 | 0.089232991  | 0 | -0.016689391 |
| 0 | 0            | 0 | 0            | 0 | 0           | 0 | 0.089155646  | 0 | 0            |
| 0 | 0            | 0 | 0.041807651  | 0 | 0           | 0 | 0.059284306  | 0 | -0.045241396 |
| 0 | 0            | 0 | 0.0444346    | 0 | 0           | 0 | 0.053148608  | 0 | -0.042125674 |
| 0 | -0.071330272 | 0 | 0.059424474  | 0 | 0           | 0 | 0            | 0 | 0.060559715  |
| 0 | -0.07063182  | 0 | 0.059552129  | 0 | 0           | 0 | 0            | 0 | 0            |
| 0 | -0.064430358 | 0 | 0.072361746  | 0 | 0           | 0 | 0            | 0 | 0.072229656  |
| 0 | -0.10115719  | 0 | 0            | 0 | 0           | 0 | 0            | 0 | 0.0779186    |
| 0 | -0.10038886  | 0 | 0            | 0 | 0           | 0 | 0            | 0 | 0            |
| 0 | 0            | 0 | 0.08661577   | 0 | 0           | 0 | 0            | 0 | 0            |
| 0 | 0            | 0 | 0.086631599  | 0 | 0           | 0 | 0            | 0 | -0.001558502 |
| 0 | 0            | 0 | 0.080769004  | 0 | 0           | 0 | 0            | 0 | 0.013139778  |
| 0 | -0.065870927 | 0 | 0.056777017  | 0 | 0           | 0 | 0            | 0 | 0.053841157  |
| 0 | -0.06521084  | 0 | 0.056904427  | 0 | 0           | 0 | 0            | 0 | 0            |
| 0 | -0.056798578 | 0 | 0.07362776   | 0 | 0           | 0 | 0            | 0 | 0.067367702  |
| 0 | 0            | 0 | 0            | 0 | 0           | 0 | 0.087071989  | 0 | -0.082736839 |
| 0 | -0.055622999 | 0 | 0.051685841  | 0 | 0           | 0 | 0            | 0 | 0.06766574   |
| 0 | 0            | 0 | 0            | 0 | 0           | 0 | 0.083483918  | 0 | -0.082770472 |
| 0 | -0.099860566 | 0 | 0            | 0 | 0           | 0 | 0            | 0 | 0.088090412  |
| 0 | 0            | 0 | 0.085917253  | 0 | 0           | 0 | 0            | 0 | 0.011979717  |
| 0 | -0.093419872 | 0 | 0            | 0 | 0           | 0 | 0            | 0 | 0.084335551  |
| 0 | 0            | 0 | 0.081636631  | 0 | 0           | 0 | 0            | 0 | 0.013446069  |
| 0 | -0.043384058 | 0 | 0            | 0 | 0.10847249  | 0 | 0            | 0 | 0            |
| 0 | -0.056816795 | 0 | -0.056956939 | 0 | 0.12477978  | 0 | 0            | 0 | 0            |
| 0 | 0            | 0 | 0            | 0 | 0           | 0 | 0            | 0 | -0.010358973 |
| 0 | 0            | 0 | 0            | 0 | 0.12380466  | 0 | 0            | 0 | 0            |
| 0 | 0            | 0 | 0            | 0 | 0.12377126  | 0 | 0            | 0 | -0.029883355 |
| 0 | -0.043812798 | 0 | 0            | 0 | 0.11030244  | 0 | 0            | 0 | 0            |
| 0 | 0            | 0 | 0            | 0 | 0.14252121  | 0 | 0            | 0 | 0            |
| 0 | 0            | 0 | 0            | 0 | 0.13522978  | 0 | -0.019548463 | 0 | 0            |
| 0 | -0.071367262 | 0 | 0            | 0 | 0.074376345 | 0 | 0            | 0 | 0.037847231  |
| 0 | -0.070899797 | 0 | 0            | 0 | 0.074388746 | 0 | 0            | 0 | 0            |

|   |              |   |              |   |            |   |              |              |
|---|--------------|---|--------------|---|------------|---|--------------|--------------|
| 0 | 0            | 0 | -0.011844558 | 0 | 0.13369363 | 0 | 0            | 0            |
| 0 | -0.047136087 | 0 | 0            | 0 | 0.09311228 | 0 | -0.027294202 | 0            |
| 0 | 0            | 0 | -0.050283005 | 0 | 0.18685179 | 0 | 0            | 0            |
| 0 | -0.055517552 | 0 | -0.055121367 | 0 | 0.15199473 | 0 | 0            | 0.027381302  |
| 0 | -0.055110489 | 0 | -0.055185348 | 0 | 0.15206601 | 0 | 0            | 0            |
| 0 | -0.035575426 | 0 | -0.045089445 | 0 | 0.15802622 | 0 | 0            | 0            |
| 0 | -0.037484719 | 0 | -0.0577905   | 0 | 0.16861291 | 0 | 0            | 0            |
| 0 | -0.039357512 | 0 | -0.057125407 | 0 | 0.15984305 | 0 | -0.00667936  | 0            |
| 0 | -0.047954628 | 0 | -0.056660856 | 0 | 0.16440456 | 0 | 0            | 0            |
| 0 | 0            | 0 | 0            | 0 | 0.13987238 | 0 | 0            | -0.033554915 |
| 0 | 0            | 0 | 0            | 0 | 0.13986502 | 0 | 0            | 0            |
| 0 | 0            | 0 | -0.046006282 | 0 | 0.15479225 | 0 | -0.037319491 | 0            |
| 0 | -0.047741854 | 0 | -0.028968846 | 0 | 0.12157284 | 0 | 0            | 0            |
| 0 | 0            | 0 | -0.05191888  | 0 | 0.13442437 | 0 | 0            | -0.03328106  |
| 0 | 0            | 0 | -0.051884317 | 0 | 0.13444076 | 0 | 0            | 0            |
| 0 | -0.037929581 | 0 | 0            | 0 | 0.13215419 | 0 | 0            | 0.020276132  |
| 0 | -0.037517628 | 0 | 0            | 0 | 0.13225518 | 0 | 0            | 0            |
| 0 | -0.02929232  | 0 | 0            | 0 | 0.1215651  | 0 | 0            | 0            |
| 0 | -0.04104397  | 0 | 0            | 0 | 0.11438878 | 0 | -0.017634946 | 0            |
| 0 | -0.040258383 | 0 | 0            | 0 | 0.11836946 | 0 | 0            | 0            |
| 0 | -0.053499477 | 0 | 0            | 0 | 0.10277004 | 0 | 0            | 0.018852621  |
| 0 | -0.053194542 | 0 | 0            | 0 | 0.10283904 | 0 | 0            | 0            |
| 0 | -0.026994709 | 0 | 0            | 0 | 0.13157274 | 0 | 0.006621058  | 0            |
| 0 | -0.052149946 | 0 | -0.054039488 | 0 | 0.13872136 | 0 | -0.031198661 | 0            |
| 0 | 0            | 0 | -0.032293097 | 0 | 0.16090275 | 0 | 0            | 0            |
| 0 | 0            | 0 | -0.03230165  | 0 | 0.16089549 | 0 | 0            | -0.020697859 |
| 0 | -0.072825735 | 0 | -0.05207774  | 0 | 0.11624163 | 0 | 0            | 0.031189403  |
| 0 | -0.072457044 | 0 | -0.052138055 | 0 | 0.11630225 | 0 | 0            | 0            |
| 0 | 0            | 0 | -0.056677561 | 0 | 0.19278412 | 0 | 0            | 0            |
| 0 | 0            | 0 | -0.056699059 | 0 | 0.19280492 | 0 | 0            | -0.026268643 |
| 0 | 0            | 0 | 0            | 0 | 0.13894262 | 0 | -0.013653478 | 0            |
| 0 | 0            | 0 | -0.03251355  | 0 | 0.17043906 | 0 | 0            | 0            |
| 0 | 0            | 0 | -0.028765135 | 0 | 0.16286339 | 0 | -0.007032494 | 0            |
| 0 | 0            | 0 | 0            | 0 | 0.11206636 | 0 | -0.039908433 | 0            |
| 0 | 0            | 0 | 0            | 0 | 0.11193029 | 0 | -0.039671158 | -0.027596792 |
| 0 | 0            | 0 | -0.057595562 | 0 | 0.1980671  | 0 | 0            | -0.044500092 |
| 0 | 0            | 0 | -0.057514248 | 0 | 0.19797328 | 0 | 0            | 0            |
| 0 | 0            | 0 | -0.053411944 | 0 | 0.17050175 | 0 | -0.020533091 | 0            |
| 0 | 0            | 0 | 0            | 0 | 0.14119535 | 0 | 0            | 0            |
| 0 | 0            | 0 | 0            | 0 | 0.1432963  | 0 | -0.000972703 | 0            |
| 0 | 0            | 0 | 0            | 0 | 0.14277967 | 0 | 0            | 0.0077949    |
| 0 | 0            | 0 | 0            | 0 | 0.14119016 | 0 | 0            | -0.015079028 |
| 0 | 0            | 0 | 0            | 0 | 0.14322282 | 0 | -0.000851281 | -0.01517086  |
| 0 | 0            | 0 | -0.053392643 | 0 | 0.1703474  | 0 | -0.020359823 | -0.024022707 |
| 0 | -0.04627318  | 0 | -0.031540713 | 0 | 0.1188512  | 0 | 0            | 0            |
| 0 | -0.047283776 | 0 | -0.053558403 | 0 | 0.14816268 | 0 | 0            | 0            |
| 0 | 0            | 0 | -0.051121854 | 0 | 0.1863389  | 0 | -0.002689987 | 0            |

|   |              |   |              |   |             |   |              |   |              |
|---|--------------|---|--------------|---|-------------|---|--------------|---|--------------|
| 0 | 0            | 0 | 0            | 0 | 0.14071409  | 0 | -0.003637708 | 0 | 0            |
| 0 | 0            | 0 | 0            | 0 | 0.14584294  | 0 | 0            | 0 | -0.033589248 |
| 0 | 0            | 0 | 0            | 0 | 0.14583579  | 0 | 0            | 0 | 0            |
| 0 | 0            | 0 | -0.052779792 | 0 | 0.15492903  | 0 | 0            | 0 | -0.003617646 |
| 0 | -0.056793781 | 0 | 0            | 0 | 0.098340137 | 0 | 0            | 0 | 0.03859315   |
| 0 | -0.050305032 | 0 | -0.051852652 | 0 | 0.13030804  | 0 | -0.021169141 | 0 | 0            |
| 0 | -0.053178045 | 0 | 0            | 0 | 0.10506105  | 0 | 0            | 0 | 0.059470853  |
| 0 | -0.053078039 | 0 | 0            | 0 | 0.1052289   | 0 | -0.000234799 | 0 | 0.03482256   |
| 0 | -0.055969528 | 0 | 0            | 0 | 0.098921972 | 0 | 0            | 0 | 0            |
| 0 | -0.052620634 | 0 | 0            | 0 | 0.10518437  | 0 | -0.000151979 | 0 | 0            |
| 0 | 0            | 0 | 0            | 0 | 0.13306489  | 0 | -0.027137485 | 0 | 0            |
| 0 | 0            | 0 | 0            | 0 | 0.13292532  | 0 | -0.026873864 | 0 | -0.03056745  |
| 0 | -0.039834073 | 0 | 0            | 0 | 0.10585306  | 0 | -0.008857354 | 0 | 0            |
| 0 | -0.04689936  | 0 | 0            | 0 | 0.09980633  | 0 | 0            | 0 | 0.010858264  |
| 0 | -0.06459644  | 0 | -0.050519295 | 0 | 0.11506684  | 0 | 0            | 0 | 0.021611339  |
| 0 | -0.046633303 | 0 | 0            | 0 | 0.099871099 | 0 | 0            | 0 | 0            |
| 0 | -0.064277668 | 0 | -0.05057145  | 0 | 0.11512559  | 0 | 0            | 0 | 0            |
| 0 | -0.040010963 | 0 | 0            | 0 | 0.10473523  | 0 | 0            | 0 | 0            |
| 0 | -0.046103847 | 0 | -0.03577743  | 0 | 0.11598324  | 0 | 0            | 0 | 0.002434392  |
| 0 | -0.045888496 | 0 | -0.035761346 | 0 | 0.1160433   | 0 | 0            | 0 | 0            |
| 0 | -0.044630496 | 0 | -0.035802443 | 0 | 0.11683839  | 0 | -0.000884471 | 0 | 0            |
| 0 | -0.044714384 | 0 | -0.035527604 | 0 | 0.11619293  | 0 | 0            | 0 | 0            |
| 0 | 0            | 0 | -0.015176344 | 0 | 0.13000954  | 0 | 0            | 0 | -0.030830498 |
| 0 | 0            | 0 | -0.015149063 | 0 | 0.13003371  | 0 | 0            | 0 | 0            |
| 0 | -0.10922797  | 0 | 0            | 0 | 0           | 0 | 0            | 0 | 0.073530101  |
| 0 | -0.048370154 | 0 | -0.05000285  | 0 | 0.12605643  | 0 | 0            | 0 | 0.002143061  |
| 0 | -0.047012751 | 0 | -0.050148229 | 0 | 0.12718735  | 0 | -0.001211971 | 0 | 0            |
| 0 | -0.048064054 | 0 | -0.05005138  | 0 | 0.12632631  | 0 | 0            | 0 | 0            |
| 0 | 0            | 0 | -0.025895719 | 0 | 0.16777601  | 0 | 0            | 0 | 0            |
| 0 | -0.031380634 | 0 | 0            | 0 | 0.11665036  | 0 | -0.003688779 | 0 | 0            |
| 0 | -0.052880694 | 0 | -0.049166795 | 0 | 0.11859149  | 0 | -0.006366231 | 0 | 0.007709878  |
| 0 | -0.052589924 | 0 | -0.049217402 | 0 | 0.11872023  | 0 | -0.006468535 | 0 | 0            |
| 0 | -0.10845733  | 0 | 0            | 0 | 0           | 0 | 0            | 0 | 0            |
| 0 | -0.055757166 | 0 | -0.049231687 | 0 | 0.11460434  | 0 | 0            | 0 | 0.033766547  |
| 0 | 0            | 0 | 0            | 0 | 0.12078818  | 0 | 0            | 0 | -0.016352691 |
| 0 | 0            | 0 | 0            | 0 | 0.089556386 | 0 | 0            | 0 | -0.006632777 |
| 0 | -0.041818792 | 0 | 0            | 0 | 0.11424137  | 0 | -0.015004293 | 0 | 0            |
| 0 | -0.053004423 | 0 | 0            | 0 | 0.10523406  | 0 | 0            | 0 | 0.017392716  |
| 0 | -0.052622241 | 0 | 0            | 0 | 0.10550698  | 0 | 0            | 0 | 0            |
| 0 | 0            | 0 | 0            | 0 | 0.14491358  | 0 | -0.014351665 | 0 | 0            |
| 0 | -0.062934579 | 0 | 0            | 0 | 0.087902795 | 0 | -0.025605585 | 0 | 0.029387408  |
| 0 | 0            | 0 | -0.014345155 | 0 | 0.14441439  | 0 | -0.02674934  | 0 | 0            |
| 0 | -0.062386986 | 0 | 0            | 0 | 0.087922701 | 0 | -0.025591022 | 0 | 0            |
| 0 | -0.046384031 | 0 | 0            | 0 | 0.083192383 | 0 | 0            | 0 | 0.009762723  |
| 0 | -0.045936954 | 0 | 0            | 0 | 0.083514109 | 0 | 0            | 0 | 0            |
| 0 | -0.040138415 | 0 | 0            | 0 | 0.087818952 | 0 | -0.003426853 | 0 | 0            |
| 0 | 0            | 0 | -0.054661074 | 0 | 0.18191075  | 0 | 0            | 0 | -0.04440752  |

|   |              |   |              |   |             |   |              |              |
|---|--------------|---|--------------|---|-------------|---|--------------|--------------|
| 0 | 0            | 0 | -0.054589554 | 0 | 0.18183046  | 0 | 0            | 0            |
| 0 | -0.039256716 | 0 | 0            | 0 | 0.093905996 | 0 | 0.004878898  | 0.001192044  |
| 0 | -0.039056093 | 0 | 0            | 0 | 0.094000651 | 0 | 0.004806318  | 0            |
| 0 | -0.037574631 | 0 | 0            | 0 | 0.096370596 | 0 | 0            | 0.024280593  |
| 0 | 0            | 0 | -0.04806284  | 0 | 0.18722715  | 0 | -0.012963565 | 0            |
| 0 | -0.070309363 | 0 | 0            | 0 | 0           | 0 | 0            | 0            |
| 0 | -0.070739251 | 0 | 0            | 0 | 0.071750324 | 0 | 0            | 0.05428298   |
| 0 | 0            | 0 | 0            | 0 | 0.13236897  | 0 | 0            | -0.034054567 |
| 0 | 0            | 0 | 0            | 0 | 0.1323648   | 0 | 0            | 0            |
| 0 | 0            | 0 | -0.050530622 | 0 | 0.15624326  | 0 | -0.045565275 | 0            |
| 0 | 0            | 0 | -0.050511434 | 0 | 0.15604287  | 0 | -0.04526894  | -0.035744787 |
| 0 | 0            | 0 | 0            | 0 | 0.1241398   | 0 | -0.018461547 | 0            |
| 0 | 0            | 0 | 0            | 0 | 0.123992    | 0 | -0.018189782 | -0.032067691 |
| 0 | 0            | 0 | -0.018791453 | 0 | 0.12742144  | 0 | 0            | 0            |
| 0 | 0            | 0 | -0.018826385 | 0 | 0.12740442  | 0 | 0            | -0.033375733 |
| 0 | 0            | 0 | -0.034279175 | 0 | 0.14645638  | 0 | 0            | -0.041227245 |
| 0 | 0            | 0 | -0.034183672 | 0 | 0.14641414  | 0 | 0            | 0            |
| 0 | -0.048737821 | 0 | -0.042109144 | 0 | 0.14847     | 0 | 0            | 0.023127273  |
| 0 | -0.048335789 | 0 | -0.042089388 | 0 | 0.14855596  | 0 | 0            | 0            |
| 0 | 0            | 0 | -0.025990967 | 0 | 0.13248208  | 0 | -0.012503509 | 0            |
| 0 | 0            | 0 | -0.025936209 | 0 | 0.13228942  | 0 | -0.012202337 | -0.037547588 |
| 0 | -0.050083456 | 0 | -0.053649248 | 0 | 0.15723258  | 0 | 0            | 0.022026853  |
| 0 | -0.049554525 | 0 | -0.053732998 | 0 | 0.15768648  | 0 | 0            | 0            |
| 0 | 0            | 0 | 0            | 0 | 0.11587315  | 0 | 0            | -0.013265929 |
| 0 | -0.053457973 | 0 | -0.052771914 | 0 | 0.15051099  | 0 | -0.00696748  | 0.025840897  |
| 0 | -0.053055148 | 0 | -0.052838681 | 0 | 0.15055807  | 0 | -0.00693081  | 0            |
| 0 | -0.033989952 | 0 | -0.045002662 | 0 | 0.16147381  | 0 | 0            | 0            |
| 0 | -0.056159939 | 0 | -0.052651871 | 0 | 0.14504132  | 0 | 0            | 0.047868732  |
| 0 | -0.034416614 | 0 | -0.042370111 | 0 | 0.155792    | 0 | -0.006029147 | 0            |
| 0 | 0            | 0 | 0            | 0 | 0.13758868  | 0 | -0.005017517 | 0            |
| 0 | 0            | 0 | 0            | 0 | 0.13757202  | 0 | -0.004830075 | -0.015793946 |
| 0 | 0            | 0 | 0            | 0 | 0.13727277  | 0 | 0            | 0.005058613  |
| 0 | 0            | 0 | -0.022483628 | 0 | 0.12566879  | 0 | 0            | -0.014571183 |
| 0 | 0            | 0 | -0.051428444 | 0 | 0.16133964  | 0 | 0            | -0.025671923 |
| 0 | 0            | 0 | -0.051333279 | 0 | 0.16121256  | 0 | -0.001731595 | -0.044407567 |
| 0 | 0            | 0 | -0.051256372 | 0 | 0.16118031  | 0 | -0.002277133 | 0            |
| 0 | -0.035784081 | 0 | -0.055650631 | 0 | 0.16952004  | 0 | -0.002676193 | 0            |
| 0 | 0            | 0 | 0            | 0 | 0.12379189  | 0 | -0.019129374 | 0.024970587  |
| 0 | 0            | 0 | 0            | 0 | 0.11583337  | 0 | -0.004305649 | 0            |
| 0 | 0            | 0 | 0            | 0 | 0.11579984  | 0 | -0.003890112 | -0.034632584 |
| 0 | 0            | 0 | 0            | 0 | 0.11586841  | 0 | 0            | -0.012334802 |
| 0 | 0            | 0 | 0            | 0 | 0.11381968  | 0 | -0.007176728 | -0.004842734 |
| 0 | -0.051465252 | 0 | 0            | 0 | 0.093096472 | 0 | 0            | 0.015443825  |
| 0 | -0.051045644 | 0 | 0            | 0 | 0.093399805 | 0 | 0            | 0            |
| 0 | 0            | 0 | 0            | 0 | 0.14254513  | 0 | -0.015830961 | 0            |
| 0 | 0            | 0 | 0            | 0 | 0.14252775  | 0 | -0.015430005 | -0.033249778 |
| 0 | -0.041548048 | 0 | 0            | 0 | 0.10098207  | 0 | -0.010802157 | 0            |

|   |              |   |              |   |             |   |              |   |              |
|---|--------------|---|--------------|---|-------------|---|--------------|---|--------------|
| 0 | -0.057504688 | 0 | 0            | 0 | 0.082707061 | 0 | -0.017195279 | 0 | 0.022749297  |
| 0 | 0            | 0 | -0.023430205 | 0 | 0.1519325   | 0 | 0            | 0 | 0            |
| 0 | -0.057038664 | 0 | 0            | 0 | 0.082740855 | 0 | -0.017204426 | 0 | 0            |
| 0 | 0            | 0 | 0            | 0 | 0.14151306  | 0 | 0            | 0 | -0.024571472 |
| 0 | 0            | 0 | -0.015745279 | 0 | 0.13648348  | 0 | -0.018161183 | 0 | 0            |
| 0 | -0.062820385 | 0 | 0            | 0 | 0.071923747 | 0 | 0            | 0 | 0.048534832  |
| 0 | 0            | 0 | -0.049120439 | 0 | 0.14796239  | 0 | -0.035685206 | 0 | 0            |
| 0 | 0            | 0 | -0.049110075 | 0 | 0.14776012  | 0 | -0.035384361 | 0 | -0.037247957 |
| 0 | -0.089628378 | 0 | 0            | 0 | 0           | 0 | 0            | 0 | 0.065398061  |
| 0 | 0            | 0 | 0            | 0 | 0.13111626  | 0 | -0.010179807 | 0 | 0            |
| 0 | -0.048216378 | 0 | 0            | 0 | 0.10948329  | 0 | 0            | 0 | 0.030782306  |
| 0 | -0.047524609 | 0 | 0            | 0 | 0.10997264  | 0 | 0            | 0 | 0            |
| 0 | -0.039817989 | 0 | 0            | 0 | 0.12499797  | 0 | 0.004502877  | 0 | 0.021986307  |
| 0 | -0.10670238  | 0 | 0            | 0 | 0           | 0 | 0            | 0 | 0.089182983  |
| 0 | -0.039478825 | 0 | 0            | 0 | 0.12503541  | 0 | 0.004580183  | 0 | 0            |
| 0 | -0.038448094 | 0 | 0            | 0 | 0.12782808  | 0 | 0            | 0 | 0.042077987  |
| 0 | 0            | 0 | -0.048235167 | 0 | 0.14152516  | 0 | -0.027188124 | 0 | 0.005438445  |
| 0 | -0.10570778  | 0 | 0            | 0 | 0           | 0 | 0            | 0 | 0            |
| 0 | -0.051845558 | 0 | 0            | 0 | 0.07702421  | 0 | -0.007127003 | 0 | 0.046128655  |
| 0 | -0.0506599   | 0 | 0            | 0 | 0.078731746 | 0 | -0.005472362 | 0 | 0.014143345  |
| 0 | -0.050138556 | 0 | 0            | 0 | 0.079093042 | 0 | -0.005303765 | 0 | 0            |
| 0 | -0.0507777   | 0 | 0            | 0 | 0.078717082 | 0 | 0            | 0 | 0.037940218  |
| 0 | -0.027885243 | 0 | 0            | 0 | 0.12428018  | 0 | -0.004575631 | 0 | 0            |
| 0 | 0            | 0 | -0.045313925 | 0 | 0.17104885  | 0 | -0.008966912 | 0 | 0            |
| 0 | 0            | 0 | -0.040915138 | 0 | 0.18072652  | 0 | 0            | 0 | 0            |
| 0 | 0            | 0 | -0.040958076 | 0 | 0.18076584  | 0 | 0            | 0 | -0.023378849 |
| 0 | 0            | 0 | -0.020097512 | 0 | 0.13112561  | 0 | -0.003208306 | 0 | 0            |
| 0 | 0            | 0 | -0.032140334 | 0 | 0.16381538  | 0 | -0.013468338 | 0 | 0            |
| 0 | 0            | 0 | -0.032083383 | 0 | 0.16367381  | 0 | -0.013289796 | 0 | -0.020669001 |
| 0 | 0            | 0 | -0.049415075 | 0 | 0.12945719  | 0 | 0            | 0 | -0.018725005 |
| 0 | 0            | 0 | -0.05480516  | 0 | 0.192892    | 0 | -0.003801757 | 0 | 0            |
| 0 | 0            | 0 | -0.054833746 | 0 | 0.19289365  | 0 | -0.003475624 | 0 | -0.026159964 |
| 0 | 0            | 0 | -0.054995724 | 0 | 0.19284463  | 0 | 0            | 0 | -0.011465059 |
| 0 | -0.070703608 | 0 | 0            | 0 | 0           | 0 | -0.004745326 | 0 | 0            |
| 0 | -0.070013903 | 0 | 0.001992866  | 0 | 0           | 0 | 0            | 0 | 0            |
| 0 | -0.10653754  | 0 | 0            | 0 | 0           | 0 | 0.045746506  | 0 | 0.062327341  |
| 0 | -0.10625583  | 0 | 0            | 0 | 0           | 0 | 0.045945853  | 0 | 0            |
| 0 | -0.042480191 | 0 | -0.04441156  | 0 | 0.14724964  | 0 | 0            | 0 | 0.015493019  |
| 0 | -0.042117079 | 0 | -0.044391388 | 0 | 0.14733163  | 0 | 0            | 0 | 0            |
| 0 | 0            | 0 | -0.028442183 | 0 | 0.15446106  | 0 | 0            | 0 | -0.001527643 |
| 0 | -0.047178768 | 0 | -0.05105213  | 0 | 0.14517295  | 0 | 0            | 0 | 0.042355876  |
| 0 | -0.048622404 | 0 | -0.050834004 | 0 | 0.14228838  | 0 | 0            | 0 | 0.020340183  |
| 0 | -0.047788903 | 0 | -0.051039538 | 0 | 0.14393336  | 0 | 0.001590819  | 0 | 0.019403705  |
| 0 | -0.048056009 | 0 | -0.050923982 | 0 | 0.14278051  | 0 | 0            | 0 | 0            |
| 0 | -0.047461617 | 0 | -0.051093207 | 0 | 0.1439837   | 0 | 0.001606957  | 0 | 0            |
| 0 | -0.033667704 | 0 | -0.042307302 | 0 | 0.14586315  | 0 | 0            | 0 | 0            |
| 0 | -0.033509077 | 0 | -0.043269754 | 0 | 0.14793681  | 0 | 0.002239367  | 0 | 0            |

|   |              |   |              |   |             |   |              |   |              |
|---|--------------|---|--------------|---|-------------|---|--------------|---|--------------|
| 0 | 0            | 0 | -0.032099077 | 0 | 0.17188371  | 0 | -0.005213859 | 0 | 0            |
| 0 | -0.035524501 | 0 | -0.052858432 | 0 | 0.15361497  | 0 | 0.00109715   | 0 | 0            |
| 0 | 0            | 0 | -0.048421861 | 0 | 0.12733137  | 0 | 0            | 0 | -0.016993186 |
| 0 | 0            | 0 | 0            | 0 | 0.12946181  | 0 | -0.011725594 | 0 | 0            |
| 0 | 0            | 0 | 0            | 0 | 0.12943816  | 0 | -0.011318622 | 0 | -0.033746397 |
| 0 | 0            | 0 | 0            | 0 | 0.12871732  | 0 | 0            | 0 | -0.020055584 |
| 0 | 0            | 0 | 0            | 0 | 0.11197358  | 0 | -0.044364065 | 0 | 0.026502565  |
| 0 | 0            | 0 | 0            | 0 | 0.14304951  | 0 | -0.005569154 | 0 | 0            |
| 0 | 0            | 0 | 0            | 0 | 0.14215562  | 0 | -0.00662143  | 0 | 0.010647665  |
| 0 | 0            | 0 | 0            | 0 | 0.14303326  | 0 | -0.005385728 | 0 | -0.0152948   |
| 0 | 0            | 0 | 0            | 0 | 0.14271185  | 0 | 0            | 0 | 0.004134092  |
| 0 | -0.10634627  | 0 | 0            | 0 | 0           | 0 | 0            | 0 | 0.071053776  |
| 0 | 0            | 0 | -0.051108894 | 0 | 0.16775857  | 0 | -0.025861882 | 0 | 0.016960229  |
| 0 | -0.10561703  | 0 | 0            | 0 | 0           | 0 | 0            | 0 | 0            |
| 0 | -0.046869932 | 0 | -0.03646933  | 0 | 0.11424375  | 0 | 0            | 0 | 0.020687678  |
| 0 | -0.046202031 | 0 | -0.036621766 | 0 | 0.11485007  | 0 | 0            | 0 | 0            |
| 0 | -0.046870965 | 0 | 0            | 0 | 0.097105023 | 0 | 0            | 0 | 0.028666727  |
| 0 | -0.04614758  | 0 | 0            | 0 | 0.097623055 | 0 | 0            | 0 | 0            |
| 0 | -0.086168226 | 0 | 0.020807896  | 0 | 0           | 0 | 0            | 0 | 0.054169237  |
| 0 | -0.085453606 | 0 | 0.021018076  | 0 | 0           | 0 | 0            | 0 | 0            |
| 0 | -0.048059777 | 0 | -0.048190622 | 0 | 0.12365428  | 0 | 0.005929258  | 0 | 0.01923309   |
| 0 | -0.033831359 | 0 | -0.039614796 | 0 | 0.12680846  | 0 | 0.006223832  | 0 | 0            |
| 0 | -0.047497378 | 0 | -0.048291569 | 0 | 0.12414178  | 0 | 0.006169434  | 0 | 0            |
| 0 | -0.048023988 | 0 | -0.047836317 | 0 | 0.12333236  | 0 | 0            | 0 | 0.050130686  |
| 0 | -0.10980207  | 0 | -0.004899282 | 0 | 0           | 0 | 0            | 0 | 0.090558466  |
| 0 | -0.1074803   | 0 | 0            | 0 | 0           | 0 | 0            | 0 | 0.11713277   |
| 0 | -0.10744333  | 0 | 0            | 0 | 0           | 0 | 0.000729974  | 0 | 0.08907056   |
| 0 | -0.038350275 | 0 | -0.045427488 | 0 | 0.13529468  | 0 | 0.016938129  | 0 | 0.009498047  |
| 0 | -0.038136116 | 0 | -0.045408345 | 0 | 0.13535007  | 0 | 0.016932083  | 0 | 0            |
| 0 | -0.040549469 | 0 | -0.049350518 | 0 | 0.13579839  | 0 | 0.014662713  | 0 | 0.027751271  |
| 0 | -0.10871765  | 0 | -0.004710523 | 0 | 0           | 0 | 0            | 0 | 0            |
| 0 | -0.10644627  | 0 | 0            | 0 | 0           | 0 | 0.001869043  | 0 | 0            |
| 0 | 0            | 0 | 0            | 0 | 0.11430926  | 0 | -0.006455581 | 0 | -0.008255042 |
| 0 | -0.051491395 | 0 | 0            | 0 | 0.10512347  | 0 | -0.00621567  | 0 | 0.06031918   |
| 0 | -0.052346879 | 0 | 0            | 0 | 0.10353624  | 0 | -0.006866055 | 0 | 0.034202824  |
| 0 | -0.028021945 | 0 | 0            | 0 | 0.11077422  | 0 | -0.00070206  | 0 | 0            |
| 0 | -0.051558989 | 0 | 0            | 0 | 0.104066    | 0 | -0.006448629 | 0 | 0            |
| 0 | -0.052424614 | 0 | 0            | 0 | 0.10306181  | 0 | 0            | 0 | 0.055344674  |
| 0 | -0.035335016 | 0 | 0            | 0 | 0.1180168   | 0 | 0.011914598  | 0 | 0.016397567  |
| 0 | -0.035065478 | 0 | 0            | 0 | 0.11805485  | 0 | 0.011968016  | 0 | 0            |
| 0 | -0.098945639 | 0 | 0            | 0 | 0           | 0 | 0            | 0 | 0.063184102  |
| 0 | -0.097794409 | 0 | 0            | 0 | 0           | 0 | -0.003568191 | 0 | 0.061983704  |
| 0 | -0.097864224 | 0 | 0            | 0 | 0           | 0 | 0            | 0 | 0.08444037   |
| 0 | -0.032441475 | 0 | -0.049548645 | 0 | 0.14749494  | 0 | 0            | 0 | 0.034096021  |
| 0 | -0.098252995 | 0 | 0            | 0 | 0           | 0 | 0            | 0 | 0            |
| 0 | -0.097137222 | 0 | 0            | 0 | 0           | 0 | -0.002832957 | 0 | 0            |
| 0 | 0            | 0 | -0.038525785 | 0 | 0.16543732  | 0 | 0            | 0 | 0            |



|   |              |   |              |   |             |   |              |              |
|---|--------------|---|--------------|---|-------------|---|--------------|--------------|
| 0 | 0            | 0 | -0.038556189 | 0 | 0.16546277  | 0 | 0            | -0.023728262 |
| 0 | -0.031689352 | 0 | 0            | 0 | 0.12542329  | 0 | 0            | 0.038266287  |
| 0 | -0.093488076 | 0 | 0.02848413   | 0 | 0           | 0 | 0            | 0.051166554  |
| 0 | 0            | 0 | -0.033907833 | 0 | 0.1563474   | 0 | -0.005269717 | 0            |
| 0 | 0            | 0 | -0.033858513 | 0 | 0.15620571  | 0 | -0.005080684 | -0.022339681 |
| 0 | -0.093002984 | 0 | 0.028452809  | 0 | 0           | 0 | 0            | 0            |
| 0 | 0            | 0 | -0.032476565 | 0 | 0.15273711  | 0 | 0            | 0.000443831  |
| 0 | -0.046371358 | 0 | 0            | 0 | 0.082059272 | 0 | 0.003880205  | 0.027230248  |
| 0 | -0.046359277 | 0 | 0            | 0 | 0.082064257 | 0 | 0            | 0.061176564  |
| 0 | 0            | 0 | 0            | 0 | 0.10509968  | 0 | -0.034730475 | 0.0201418    |
| 0 | -0.04564102  | 0 | 0            | 0 | 0.082570957 | 0 | 0.004204591  | 0            |
| 0 | 0            | 0 | -0.052213142 | 0 | 0.17729111  | 0 | 0            | -0.006396346 |
| 0 | 0            | 0 | -0.052198097 | 0 | 0.17727901  | 0 | -6.47E-05    | 0            |
| 0 | 0            | 0 | -0.05223263  | 0 | 0.17729181  | 0 | 0.000260354  | -0.02657813  |
| 0 | -0.067857736 | 0 | 0.015631512  | 0 | 0           | 0 | 0.03090172   | 0            |
| 0 | -0.073781679 | 0 | 0            | 0 | 0           | 0 | 0.049575065  | 0            |
| 0 | -0.059157923 | 0 | 0.051201093  | 0 | 0           | 0 | 0            | 0            |
| 0 | 0            | 0 | -0.029687271 | 0 | 0.15628926  | 0 | -0.001472089 | 0            |
| 0 | 0            | 0 | -0.04969446  | 0 | 0.15980444  | 0 | -0.01559876  | 0.010804022  |
| 0 | 0            | 0 | 0.065689567  | 0 | 0           | 0 | 0            | 0            |
| 0 | -0.05684297  | 0 | 0.036924273  | 0 | 0           | 0 | 0            | 0            |
| 0 | 0            | 0 | -0.035956478 | 0 | 0.14685332  | 0 | 0.005027383  | 0            |
| 0 | 0            | 0 | -0.036610125 | 0 | 0.14795454  | 0 | 0.005875434  | -0.001624136 |
| 0 | 0            | 0 | -0.035996774 | 0 | 0.14686218  | 0 | 0.005324701  | -0.024273239 |
| 0 | 0            | 0 | -0.035640841 | 0 | 0.14651938  | 0 | 0            | 0.004456795  |
| 0 | 0            | 0 | 0            | 0 | 0.12984584  | 0 | -0.001720096 | 0            |
| 0 | 0            | 0 | 0            | 0 | 0.12974247  | 0 | 0            | 0.008065311  |
| 0 | 0            | 0 | 0            | 0 | 0.12982941  | 0 | -0.001529404 | -0.016220529 |
| 0 | 0            | 0 | 0            | 0 | 0.13347622  | 0 | 0.001928407  | 0.005680899  |
| 0 | 0            | 0 | -0.049575897 | 0 | 0.15866939  | 0 | 0.005139057  | -0.005007405 |
| 0 | -0.029151755 | 0 | 0            | 0 | 0.10798542  | 0 | 0.024773423  | 0.018570619  |
| 0 | -0.055368424 | 0 | 0.032223548  | 0 | 0           | 0 | -0.005505787 | 0            |
| 0 | -0.10735682  | 0 | 0            | 0 | 0           | 0 | -0.00946187  | 0.072143861  |
| 0 | -0.055415806 | 0 | 0.031757704  | 0 | 0           | 0 | 0            | 0            |
| 0 | -0.10856159  | 0 | -0.00309277  | 0 | 0           | 0 | 0            | 0.072669774  |
| 0 | -0.10709645  | 0 | 0            | 0 | 0           | 0 | 0            | 0.087478275  |
| 0 | -0.10653928  | 0 | 0            | 0 | 0           | 0 | -0.00856393  | 0            |
| 0 | -0.10776332  | 0 | -0.002957426 | 0 | 0           | 0 | 0            | 0            |
| 0 | -0.04603271  | 0 | 0.036128584  | 0 | 0           | 0 | 0            | 0            |
| 0 | -0.050911105 | 0 | 0            | 0 | 0.091498752 | 0 | -0.002924001 | 0.031933653  |
| 0 | -0.050967428 | 0 | 0            | 0 | 0.091285631 | 0 | 0            | 0.057925191  |
| 0 | -0.050140651 | 0 | 0            | 0 | 0.092025213 | 0 | -0.002536096 | 0            |
| 0 | -0.046079862 | 0 | 0            | 0 | 0.10017381  | 0 | 0.002120333  | 0.05029562   |
| 0 | 0            | 0 | 0            | 0 | 0.11471123  | 0 | 0.003064676  | 0.010387652  |
| 0 | 0            | 0 | 0            | 0 | 0.13941546  | 0 | -0.007595086 | 0.008779885  |
| 0 | -0.10202725  | 0 | -0.005253901 | 0 | 0           | 0 | -0.004969506 | 0.06528328   |
| 0 | -0.10221641  | 0 | -0.005432679 | 0 | 0           | 0 | 0            | 0.085901827  |

|   |              |   |              |   |             |              |              |             |
|---|--------------|---|--------------|---|-------------|--------------|--------------|-------------|
| 0 | -0.10242279  | 0 | -0.005342934 | 0 | 0           | 0            | 0            | 0.065645242 |
| 0 | -0.099234776 | 0 | 0            | 0 | 0           | -0.005734955 | 0            | 0.08977543  |
| 0 | -0.10002954  | 0 | 0            | 0 | 0           | -0.005854724 | 0            | 0.064321509 |
| 0 | -0.099886947 | 0 | 0            | 0 | 0           | 0            | 0            | 0.08453488  |
| 0 | -0.1012874   | 0 | -0.005132853 | 0 | 0           | -0.004211299 | 0            | 0           |
| 0 | -0.1016568   | 0 | -0.005210732 | 0 | 0           | 0            | 0            | 0           |
| 0 | -0.10673164  | 0 | 0            | 0 | 0           | 0            | 0            | 0.055485728 |
| 0 | -0.099279452 | 0 | 0            | 0 | 0           | -0.005054976 | 0            | 0           |
| 0 | -0.10622122  | 0 | 0            | 0 | 0           | 0            | 0            | 0           |
| 0 | -0.050345216 | 0 | 0            | 0 | 0.078045036 | 0            | 0.001321468  | 0.060981579 |
| 0 | -0.10600085  | 0 | 0            | 0 | 0           | 0            | 0            | 0.055602124 |
| 0 | -0.069143681 | 0 | 0            | 0 | 0           | -0.005487651 | 0            | 0           |
| 0 | -0.066064885 | 0 | 0            | 0 | 0           | -0.002177445 | 0            | 0           |
| 0 | -0.058002946 | 0 | 0            | 0 | 0           | 0.007174081  | 0            | 0           |
| 0 | -0.09258947  | 0 | 0.02467014   | 0 | 0           | 0            | 0            | 0.079689738 |
| 0 | 0            | 0 | 0            | 0 | 0.12679049  | 0            | -0.003776394 | 0.00900233  |
| 0 | -0.091583612 | 0 | 0.024905092  | 0 | 0           | 0            | 0            | 0           |
| 0 | -0.10469316  | 0 | 0            | 0 | 0           | 0            | 0            | 0.11259193  |
| 0 | -0.07820779  | 0 | 0.029521537  | 0 | 0           | 0.047658336  | 0            | 0           |
| 0 | -0.10467673  | 0 | 0            | 0 | 0           | -4.02E-06    | 0            | 0.086917562 |
| 0 | -0.078306283 | 0 | 0.029564028  | 0 | 0           | 0.047442744  | 0            | 0.039256928 |
| 0 | -0.098420473 | 0 | 0.013980068  | 0 | 0           | 0.032177903  | 0            | 0.058841228 |
| 0 | -0.098155259 | 0 | 0.013822733  | 0 | 0           | 0.032455808  | 0            | 0           |
| 0 | -0.087395533 | 0 | 0.020569906  | 0 | 0           | 0            | 0            | 0.073007774 |
| 0 | -0.086174024 | 0 | 0.019491334  | 0 | 0           | 0            | 0            | 0.10372622  |
| 0 | -0.086227644 | 0 | 0.019381271  | 0 | 0           | 0.002638923  | 0            | 0.071364822 |
| 0 | -0.10371293  | 0 | 0            | 0 | 0           | 0.001108043  | 0            | 0           |
| 0 | -0.086422337 | 0 | 0.020807523  | 0 | 0           | 0            | 0            | 0           |
| 0 | -0.085346862 | 0 | 0.019603586  | 0 | 0           | 0.003494292  | 0            | 0           |
| 0 | -0.10390742  | 0 | 0            | 0 | 0           | 0.047528687  | 0            | 0           |
| 0 | -0.10414018  | 0 | 0            | 0 | 0           | 0.047200393  | 0            | 0.059798581 |
| 0 | -0.057693114 | 0 | 0.043752721  | 0 | 0           | 0.035736059  | 0            | 0           |
| 0 | -0.10463238  | 0 | 0            | 0 | 0           | 0.041234506  | 0            | 0.032386731 |
| 0 | -0.065930429 | 0 | 0.001835349  | 0 | 0           | -0.004036066 | 0            | 0           |
| 0 | -0.097143961 | 0 | 0            | 0 | 0           | 0.003276971  | 0            | 0.10597865  |
| 0 | -0.097459386 | 0 | 0            | 0 | 0           | 0.003430566  | 0            | 0.078918854 |
| 0 | -0.097567057 | 0 | 0            | 0 | 0           | 0            | 0            | 0.10936364  |
| 0 | -0.067909152 | 0 | 0.004950803  | 0 | 0           | -0.007688759 | 0            | 0           |
| 0 | -0.096567704 | 0 | 0            | 0 | 0           | 0.00444111   | 0            | 0           |
| 0 | -0.082768285 | 0 | 0.045688624  | 0 | 0           | 0            | 0            | 0.043623514 |
| 0 | -0.057233901 | 0 | 0.004896426  | 0 | 0           | 0.004602949  | 0            | 0           |
| 0 | -0.082311958 | 0 | 0.045761725  | 0 | 0           | 0            | 0            | 0           |
| 0 | -0.09183493  | 0 | 0.012335662  | 0 | 0           | 0.037717289  | 0            | 0.051167002 |
| 0 | -0.091634526 | 0 | 0.012195486  | 0 | 0           | 0.037965619  | 0            | 0           |
| 0 | -0.089545386 | 0 | 0.011624945  | 0 | 0           | 0.04004456   | 0            | 0.02972906  |
| 0 | -0.096674444 | 0 | 0            | 0 | 0           | 0.051377694  | 0            | 0           |
| 0 | -0.056326944 | 0 | 0.038683208  | 0 | 0           | 0.040930018  | 0            | 0           |



|   |              |   |             |   |   |   |              |   |              |
|---|--------------|---|-------------|---|---|---|--------------|---|--------------|
| 0 | 0            | 0 | 0           | 0 | 0 | 0 | -0.00245931  | 0 | -0.028303056 |
| 0 | 0            | 0 | 0           | 0 | 0 | 0 | -0.002802964 | 0 | 0            |
| 0 | 0            | 0 | 0           | 0 | 0 | 0 | 0            | 0 | -0.016926516 |
| 0 | 0            | 0 | 0.035100481 | 0 | 0 | 0 | 0.022555276  | 0 | -0.027724299 |
| 0 | 0            | 0 | 0.035223799 | 0 | 0 | 0 | 0.022415655  | 0 | 0            |
| 0 | 0            | 0 | 0.043996143 | 0 | 0 | 0 | 0            | 0 | -0.01971533  |
| 0 | 0            | 0 | 0.0702616   | 0 | 0 | 0 | 0.033463242  | 0 | -0.024569767 |
| 0 | 0            | 0 | 0.070366221 | 0 | 0 | 0 | 0.03333907   | 0 | 0            |
| 0 | -0.043368339 | 0 | 0.046238323 | 0 | 0 | 0 | 0.079612621  | 0 | 0            |
| 0 | 0            | 0 | 0.064472092 | 0 | 0 | 0 | 0.038381994  | 0 | -0.026592462 |
| 0 | 0            | 0 | 0.065314884 | 0 | 0 | 0 | 0.037725668  | 0 | -0.049283158 |
| 0 | 0            | 0 | 0.064583872 | 0 | 0 | 0 | 0.038246985  | 0 | 0            |
| 0 | 0            | 0 | 0           | 0 | 0 | 0 | 0.00678778   | 0 | 0            |
| 0 | 0            | 0 | 0           | 0 | 0 | 0 | 0.006923093  | 0 | -0.011369689 |
| 0 | 0            | 0 | 0           | 0 | 0 | 0 | 0            | 0 | 0.010427702  |
| 0 | 0            | 0 | 0           | 0 | 0 | 0 | 0.053814636  | 0 | -0.037584669 |
| 0 | 0            | 0 | 0           | 0 | 0 | 0 | 0.053666535  | 0 | 0            |
| 0 | 0            | 0 | 0.056181763 | 0 | 0 | 0 | 0            | 0 | 0.024172447  |
| 0 | 0            | 0 | 0.056067071 | 0 | 0 | 0 | 0.001289076  | 0 | 0            |
| 0 | 0            | 0 | 0.056089854 | 0 | 0 | 0 | 0.001316428  | 0 | -0.003117751 |
| 0 | 0            | 0 | 0.076956633 | 0 | 0 | 0 | 0            | 0 | -0.021870371 |
| 0 | 0            | 0 | 0.06181938  | 0 | 0 | 0 | 0            | 0 | 0.021796813  |
| 0 | 0            | 0 | 0.061909395 | 0 | 0 | 0 | -0.002270006 | 0 | 0            |
| 0 | 0            | 0 | 0.06193649  | 0 | 0 | 0 | -0.002268432 | 0 | -0.001040721 |
| 0 | 0            | 0 | 0           | 0 | 0 | 0 | 0            | 0 | -0.014720162 |
| 0 | 0            | 0 | 0           | 0 | 0 | 0 | -8.50E-06    | 0 | -0.028978196 |
| 0 | 0            | 0 | 0           | 0 | 0 | 0 | -0.000356563 | 0 | 0            |
| 0 | 0            | 0 | 0.059517657 | 0 | 0 | 0 | -0.001114065 | 0 | 0.023848779  |
| 0 | 0            | 0 | 0           | 0 | 0 | 0 | 0.045159556  | 0 | -0.072463361 |
| 0 | 0            | 0 | 0.025485232 | 0 | 0 | 0 | 0.001305251  | 0 | 0            |
| 0 | 0            | 0 | 0.025567178 | 0 | 0 | 0 | 0            | 0 | 0.013142983  |
| 0 | 0            | 0 | 0.025487137 | 0 | 0 | 0 | 0.001398098  | 0 | -0.00808615  |
| 0 | 0            | 0 | 0.072146916 | 0 | 0 | 0 | 0            | 0 | -0.020558096 |
| 0 | -0.082256662 | 0 | 0.037078706 | 0 | 0 | 0 | 0.076018819  | 0 | 0            |
| 0 | -0.082380071 | 0 | 0.037181835 | 0 | 0 | 0 | 0.075670334  | 0 | 0.067255456  |
| 0 | 0            | 0 | 0           | 0 | 0 | 0 | -0.003109909 | 0 | -0.028093538 |
| 0 | 0            | 0 | 0           | 0 | 0 | 0 | -0.003446029 | 0 | 0            |
| 0 | 0            | 0 | 0           | 0 | 0 | 0 | 0            | 0 | -0.018733029 |
| 0 | 0            | 0 | 0.023691792 | 0 | 0 | 0 | -0.005281275 | 0 | 0            |
| 0 | 0            | 0 | 0.023663816 | 0 | 0 | 0 | -0.004975092 | 0 | -0.025170717 |
| 0 | 0            | 0 | 0.023407149 | 0 | 0 | 0 | 0            | 0 | -0.012492567 |
| 0 | -0.088609211 | 0 | 0.025559621 | 0 | 0 | 0 | 0.070799153  | 0 | 0.025492159  |
| 0 | 0            | 0 | 0           | 0 | 0 | 0 | -0.005652028 | 0 | -0.015840026 |
| 0 | 0            | 0 | 0           | 0 | 0 | 0 | 0.004772247  | 0 | 0.002026178  |
| 0 | -0.077305157 | 0 | 0.033139756 | 0 | 0 | 0 | 0.080041771  | 0 | 0            |
| 0 | -0.077375361 | 0 | 0.033246415 | 0 | 0 | 0 | 0.079719037  | 0 | 0.060686087  |
| 0 | 0            | 0 | 0.027423898 | 0 | 0 | 0 | -0.008801439 | 0 | 0            |

|   |              |   |              |   |            |   |              |   |              |
|---|--------------|---|--------------|---|------------|---|--------------|---|--------------|
| 0 | 0            | 0 | 0.02739781   | 0 | 0          | 0 | -0.008513249 | 0 | -0.023715489 |
| 0 | 0            | 0 | 0.02873086   | 0 | 0          | 0 | -0.009945478 | 0 | -0.005915619 |
| 0 | 0            | 0 | 0.026942914  | 0 | 0          | 0 | 0            | 0 | -0.01420987  |
| 0 | -0.075074217 | 0 | 0.031108271  | 0 | 0          | 0 | 0.082367835  | 0 | 0.007764515  |
| 0 | -0.082403319 | 0 | 0.023964628  | 0 | 0          | 0 | 0.075917644  | 0 | 0.017502956  |
| 0 | 0            | 0 | 0            | 0 | 0          | 0 | -0.001860148 | 0 | -0.014220877 |
| 0 | 0            | 0 | 0.068857665  | 0 | 0          | 0 | 0.074643681  | 0 | -0.004436522 |
| 0 | 0            | 0 | 0.068929324  | 0 | 0          | 0 | 0.074606226  | 0 | 0            |
| 0 | -0.10021795  | 0 | 0            | 0 | 0          | 0 | 0.083870325  | 0 | 0.018006668  |
| 0 | 0            | 0 | 0.033259644  | 0 | 0          | 0 | 0.023736703  | 0 | -0.039602663 |
| 0 | 0            | 0 | 0.036077034  | 0 | 0          | 0 | 0.017601755  | 0 | -0.036386225 |
| 0 | -0.093460521 | 0 | 0            | 0 | 0          | 0 | 0.087190227  | 0 | 0.011626313  |
| 0 | 0            | 0 | 0            | 0 | 0          | 0 | -0.004875385 | 0 | -0.015376005 |
| 0 | 0            | 0 | 0            | 0 | 0          | 0 | 0            | 0 | -0.045176416 |
| 0 | 0            | 0 | 0            | 0 | 0          | 0 | 0.007085042  | 0 | 0.00345685   |
| 0 | 0            | 0 | 0.043795863  | 0 | 0          | 0 | 0.059288499  | 0 | -0.044973591 |
| 0 | 0            | 0 | 0            | 0 | 0          | 0 | 0.052738318  | 0 | -0.079941081 |
| 0 | 0            | 0 | 0.023729753  | 0 | 0          | 0 | 0.001894751  | 0 | 0.011010369  |
| 0 | 0            | 0 | 0            | 0 | 0          | 0 | 0.004138405  | 0 | 0.002432526  |
| 0 | 0            | 0 | 0            | 0 | 0          | 0 | 0.048915388  | 0 | -0.080014743 |
| 0 | 0            | 0 | 0.027369007  | 0 | 0          | 0 | -0.00149067  | 0 | 0.01128148   |
| 0 | -0.072492296 | 0 | 0.059729301  | 0 | 0          | 0 | 0            | 0 | 0.061694183  |
| 0 | -0.071762045 | 0 | 0.059863887  | 0 | 0          | 0 | 0            | 0 | 0            |
| 0 | -0.064242109 | 0 | 0.075153018  | 0 | 0          | 0 | 0            | 0 | 0.074801914  |
| 0 | 0            | 0 | 0.069383559  | 0 | 0          | 0 | 0.068752579  | 0 | -0.050491543 |
| 0 | 0            | 0 | 0.063958481  | 0 | 0          | 0 | 0.073194915  | 0 | -0.05272402  |
| 0 | 0            | 0 | 0            | 0 | 0          | 0 | 0.089571425  | 0 | -0.08536158  |
| 0 | -0.071335093 | 0 | 0.059433934  | 0 | 0          | 0 | 0            | 0 | 0.076361777  |
| 0 | -0.10116437  | 0 | 0            | 0 | 0          | 0 | 0            | 0 | 0.091570111  |
| 0 | 0            | 0 | 0.086642774  | 0 | 0          | 0 | 0            | 0 | 0.014316125  |
| 0 | -0.065877273 | 0 | 0.056788917  | 0 | 0          | 0 | 0            | 0 | 0.072874007  |
| 0 | -0.050082285 | 0 | -0.058789286 | 0 | 0.16339301 | 0 | 0            | 0 | 0            |
| 0 | -0.04921186  | 0 | -0.032367617 | 0 | 0.12627161 | 0 | 0            | 0 | 0            |
| 0 | -0.053997357 | 0 | 0            | 0 | 0.10565726 | 0 | 0            | 0 | 0.018252946  |
| 0 | -0.053672691 | 0 | 0            | 0 | 0.10572878 | 0 | 0            | 0 | 0            |
| 0 | -0.042316059 | 0 | 0            | 0 | 0.11461641 | 0 | -0.0124978   | 0 | 0            |
| 0 | -0.053860719 | 0 | -0.056550295 | 0 | 0.14050701 | 0 | -0.026349143 | 0 | 0            |
| 0 | -0.042072549 | 0 | 0            | 0 | 0.1157068  | 0 | 0            | 0 | 0            |
| 0 | -0.073573675 | 0 | -0.054630132 | 0 | 0.12112976 | 0 | 0            | 0 | 0.030381767  |
| 0 | -0.073188148 | 0 | -0.054691685 | 0 | 0.12119433 | 0 | 0            | 0 | 0            |
| 0 | 0            | 0 | -0.059415764 | 0 | 0.19817778 | 0 | 0            | 0 | -0.045009634 |
| 0 | 0            | 0 | -0.059338842 | 0 | 0.19808939 | 0 | 0            | 0 | 0            |
| 0 | 0            | 0 | 0            | 0 | 0.1443779  | 0 | 0            | 0 | -0.033760168 |
| 0 | 0            | 0 | 0            | 0 | 0.14438724 | 0 | 0            | 0 | 0            |
| 0 | 0            | 0 | 0            | 0 | 0.13387386 | 0 | -0.022338821 | 0 | 0            |
| 0 | 0            | 0 | 0            | 0 | 0.13372987 | 0 | -0.022071383 | 0 | -0.031275436 |
| 0 | 0            | 0 | -0.018225524 | 0 | 0.13493953 | 0 | 0            | 0 | -0.032270505 |

|   |              |   |              |   |             |   |              |              |
|---|--------------|---|--------------|---|-------------|---|--------------|--------------|
| 0 | 0            | 0 | -0.01819087  | 0 | 0.1349556   | 0 | 0            | 0            |
| 0 | 0            | 0 | 0            | 0 | 0.12378474  | 0 | 0            | -0.013548953 |
| 0 | 0            | 0 | -0.025892667 | 0 | 0.16630083  | 0 | 0            | 0            |
| 0 | -0.057513174 | 0 | 0            | 0 | 0.10045292  | 0 | 0            | 0.021546234  |
| 0 | -0.057030729 | 0 | 0            | 0 | 0.10079798  | 0 | 0            | 0            |
| 0 | -0.065074438 | 0 | 0            | 0 | 0.087342148 | 0 | -0.020608741 | 0.030684022  |
| 0 | -0.043688912 | 0 | 0            | 0 | 0.11121548  | 0 | -0.012591389 | 0            |
| 0 | -0.064532366 | 0 | 0            | 0 | 0.087352925 | 0 | -0.020581538 | 0            |
| 0 | 0            | 0 | -0.016146814 | 0 | 0.14650955  | 0 | -0.022185552 | 0            |
| 0 | 0            | 0 | 0            | 0 | 0.14329136  | 0 | -0.011891373 | 0            |
| 0 | -0.071360026 | 0 | 0            | 0 | 0.074374755 | 0 | 0            | 0.056243829  |
| 0 | 0            | 0 | -0.049863352 | 0 | 0.18715044  | 0 | -0.01052042  | 0            |
| 0 | 0            | 0 | -0.05284792  | 0 | 0.15853704  | 0 | -0.041261696 | 0            |
| 0 | 0            | 0 | -0.052831017 | 0 | 0.15833239  | 0 | -0.040959763 | 0            |
| 0 | -0.049193192 | 0 | -0.046104693 | 0 | 0.15487916  | 0 | 0            | 0.022910724  |
| 0 | -0.048765441 | 0 | -0.04608248  | 0 | 0.1549705   | 0 | 0            | 0            |
| 0 | -0.055525412 | 0 | -0.055114745 | 0 | 0.15200027  | 0 | 0            | 0.049966418  |
| 0 | -0.054482036 | 0 | -0.055285698 | 0 | 0.15406309  | 0 | 0            | 0.026299041  |
| 0 | -0.055091576 | 0 | -0.055136596 | 0 | 0.15285273  | 0 | -0.001102543 | 0.026981378  |
| 0 | -0.053848843 | 0 | -0.055385586 | 0 | 0.15460856  | 0 | 0            | 0            |
| 0 | -0.054699203 | 0 | -0.055200383 | 0 | 0.15288723  | 0 | -0.0010541   | 0            |
| 0 | -0.0353993   | 0 | -0.045768198 | 0 | 0.15973488  | 0 | 0            | 0            |
| 0 | -0.035513733 | 0 | -0.045224144 | 0 | 0.15846452  | 0 | -0.000642638 | 0            |
| 0 | -0.037489287 | 0 | -0.057796871 | 0 | 0.16860719  | 0 | 0.000142734  | 0            |
| 0 | -0.045568358 | 0 | -0.041532133 | 0 | 0.15312622  | 0 | 0            | 0            |
| 0 | -0.046557348 | 0 | -0.03280849  | 0 | 0.13461515  | 0 | -0.022137064 | 0            |
| 0 | -0.047801049 | 0 | -0.05618866  | 0 | 0.16479178  | 0 | -0.011376773 | 0            |
| 0 | -0.050600236 | 0 | -0.056248395 | 0 | 0.16209991  | 0 | 0            | 0.004233271  |
| 0 | -0.050427521 | 0 | -0.05627654  | 0 | 0.1622512   | 0 | 0            | 0            |
| 0 | -0.052480087 | 0 | 0            | 0 | 0.10498147  | 0 | 0            | 0.035266914  |
| 0 | -0.059960299 | 0 | -0.029978987 | 0 | 0.11894063  | 0 | 0            | 0.02069141   |
| 0 | 0            | 0 | 0            | 0 | 0.14076127  | 0 | -0.013524217 | 0            |
| 0 | -0.05962811  | 0 | -0.029947574 | 0 | 0.11899122  | 0 | 0            | 0            |
| 0 | 0            | 0 | 0            | 0 | 0.1407367   | 0 | -0.013120783 | 0            |
| 0 | -0.051678851 | 0 | 0            | 0 | 0.10554942  | 0 | 0            | 0            |
| 0 | 0            | 0 | 0            | 0 | 0.13987383  | 0 | 0            | -0.021988082 |
| 0 | 0            | 0 | -0.051912905 | 0 | 0.13443439  | 0 | 0            | -0.01719702  |
| 0 | -0.041132713 | 0 | 0            | 0 | 0.12563726  | 0 | 0.010479716  | 0.023239626  |
| 0 | -0.040805682 | 0 | 0            | 0 | 0.12566381  | 0 | 0.010571605  | 0            |
| 0 | -0.049693559 | 0 | 0            | 0 | 0.11086943  | 0 | -0.015031053 | 0.014495194  |
| 0 | -0.049311417 | 0 | 0            | 0 | 0.11095946  | 0 | -0.015031097 | 0            |
| 0 | -0.064782198 | 0 | -0.052429215 | 0 | 0.13324888  | 0 | -0.026461401 | 0.021943231  |
| 0 | -0.064298127 | 0 | -0.052501675 | 0 | 0.13335212  | 0 | -0.026480693 | 0            |
| 0 | -0.040143574 | 0 | 0            | 0 | 0.11930939  | 0 | -0.013504322 | 0            |
| 0 | -0.037938877 | 0 | 0            | 0 | 0.1321659   | 0 | 0            | 0.044721944  |
| 0 | -0.029249973 | 0 | 0            | 0 | 0.1217033   | 0 | -0.001796484 | 0            |
| 0 | -0.048403258 | 0 | 0            | 0 | 0.11248146  | 0 | 0            | 0.012796829  |

|   |              |   |              |   |             |   |              |              |
|---|--------------|---|--------------|---|-------------|---|--------------|--------------|
| 0 | -0.048066894 | 0 | 0            | 0 | 0.11272301  | 0 | 0            | 0            |
| 0 | -0.053502251 | 0 | 0            | 0 | 0.10278431  | 0 | 0            | 0.033524577  |
| 0 | -0.10848338  | 0 | 0            | 0 | 0           | 0 | 0            | 0.07279439   |
| 0 | 0            | 0 | -0.041021666 | 0 | 0.17930717  | 0 | 0            | 0            |
| 0 | 0            | 0 | -0.041052553 | 0 | 0.17933239  | 0 | 0            | -0.023009048 |
| 0 | -0.10770921  | 0 | 0            | 0 | 0           | 0 | 0            | 0            |
| 0 | 0            | 0 | -0.034561083 | 0 | 0.16665978  | 0 | -0.008361022 | 0            |
| 0 | 0            | 0 | -0.034505651 | 0 | 0.16651808  | 0 | -0.008182006 | 0            |
| 0 | 0            | 0 | -0.032347482 | 0 | 0.16096006  | 0 | 0            | -0.001914052 |
| 0 | -0.072827628 | 0 | -0.052073882 | 0 | 0.11625074  | 0 | 0            | 0.045274012  |
| 0 | 0            | 0 | -0.056623958 | 0 | 0.19280664  | 0 | -0.001163937 | 0            |
| 0 | 0            | 0 | -0.056691362 | 0 | 0.19280212  | 0 | 0            | -0.007841787 |
| 0 | 0            | 0 | -0.056659656 | 0 | 0.19281901  | 0 | -0.000843304 | 0            |
| 0 | 0            | 0 | -0.039856214 | 0 | 0.18286395  | 0 | 0            | -0.04117825  |
| 0 | 0            | 0 | -0.039721442 | 0 | 0.18272774  | 0 | 0            | 0            |
| 0 | 0            | 0 | -0.032421564 | 0 | 0.17051594  | 0 | -0.002541728 | 0            |
| 0 | 0            | 0 | -0.057092087 | 0 | 0.19833787  | 0 | -0.011693981 | 0            |
| 0 | 0            | 0 | -0.05700037  | 0 | 0.19827325  | 0 | -0.012228599 | 0            |
| 0 | 0            | 0 | 0            | 0 | 0.11221185  | 0 | -0.040085579 | 0            |
| 0 | 0            | 0 | -0.057593161 | 0 | 0.19806473  | 0 | 0            | -0.038586888 |
| 0 | -0.044955444 | 0 | -0.038799853 | 0 | 0.13708486  | 0 | 0            | 0            |
| 0 | -0.045521616 | 0 | -0.03383111  | 0 | 0.12666866  | 0 | -0.013425734 | 0            |
| 0 | -0.053804314 | 0 | -0.032153168 | 0 | 0.1171594   | 0 | 0            | 0.012790595  |
| 0 | -0.053518181 | 0 | -0.032131311 | 0 | 0.11721835  | 0 | 0            | 0            |
| 0 | 0            | 0 | 0            | 0 | 0.14137237  | 0 | -0.00293204  | 0            |
| 0 | 0            | 0 | -0.053388756 | 0 | 0.17056843  | 0 | -0.020638385 | 0            |
| 0 | 0            | 0 | 0            | 0 | 0.1413563   | 0 | -0.002751389 | 0            |
| 0 | 0            | 0 | 0            | 0 | 0.14119348  | 0 | 0            | 0.008003944  |
| 0 | 0            | 0 | 0            | 0 | 0.14333919  | 0 | -0.001042168 | 0            |
| 0 | -0.047178156 | 0 | -0.053247772 | 0 | 0.14839689  | 0 | -0.007245033 | 0            |
| 0 | -0.049055979 | 0 | -0.053285009 | 0 | 0.14661556  | 0 | 0            | 0.00283092   |
| 0 | -0.048839549 | 0 | -0.053314553 | 0 | 0.14679829  | 0 | 0            | 0            |
| 0 | 0            | 0 | 0            | 0 | 0.14674811  | 0 | -0.014215802 | 0            |
| 0 | 0            | 0 | 0            | 0 | 0.1467237   | 0 | -0.013812821 | 0            |
| 0 | 0            | 0 | -0.021811745 | 0 | 0.14816285  | 0 | -0.031008453 | 0            |
| 0 | 0            | 0 | -0.02174741  | 0 | 0.147965    | 0 | -0.030709576 | 0            |
| 0 | 0            | 0 | 0            | 0 | 0.14584383  | 0 | 0            | -0.023241813 |
| 0 | -0.059104867 | 0 | -0.050688908 | 0 | 0.12639523  | 0 | -0.017804016 | 0            |
| 0 | -0.058701227 | 0 | -0.050750167 | 0 | 0.12650183  | 0 | -0.017846813 | 0            |
| 0 | -0.056750649 | 0 | 0            | 0 | 0.098635985 | 0 | -0.004276903 | 0            |
| 0 | -0.05681698  | 0 | 0            | 0 | 0.098326815 | 0 | 0            | 0.0636228    |
| 0 | -0.055885791 | 0 | 0            | 0 | 0.09921759  | 0 | -0.003806335 | 0            |
| 0 | -0.053008817 | 0 | 0            | 0 | 0.1053968   | 0 | -0.000437822 | 0            |
| 0 | 0            | 0 | 0            | 0 | 0.13309912  | 0 | -0.027191088 | 0            |
| 0 | -0.045043997 | 0 | 0            | 0 | 0.10368997  | 0 | -0.007259668 | 0            |
| 0 | -0.04473694  | 0 | 0            | 0 | 0.10377844  | 0 | -0.007285942 | 0            |
| 0 | -0.039922757 | 0 | 0            | 0 | 0.10537872  | 0 | -0.009246251 | 0            |

|   |              |   |              |   |             |   |              |              |
|---|--------------|---|--------------|---|-------------|---|--------------|--------------|
| 0 | -0.046902403 | 0 | 0            | 0 | 0.099821894 | 0 | 0            | 0.029466618  |
| 0 | -0.046981398 | 0 | 0            | 0 | 0.099650914 | 0 | 0            | 0.010955773  |
| 0 | -0.064604263 | 0 | -0.0505132   | 0 | 0.11507833  | 0 | 0            | 0.04019725   |
| 0 | -0.046607547 | 0 | 0            | 0 | 0.099924739 | 0 | 0            | 0            |
| 0 | -0.058630086 | 0 | 0.035138329  | 0 | 0           | 0 | 0            | 0            |
| 0 | -0.046120968 | 0 | -0.035777811 | 0 | 0.11600512  | 0 | 0            | 0.026127368  |
| 0 | -0.046905337 | 0 | -0.035074903 | 0 | 0.11415264  | 0 | 0            | 0.003530786  |
| 0 | -0.046565866 | 0 | -0.035147327 | 0 | 0.11446712  | 0 | 0            | 0            |
| 0 | -0.045998681 | 0 | -0.035859157 | 0 | 0.11620704  | 0 | -0.000359816 | 0.002299021  |
| 0 | -0.045754904 | 0 | -0.035850812 | 0 | 0.11631525  | 0 | -0.000434506 | 0            |
| 0 | -0.044689762 | 0 | -0.03543589  | 0 | 0.11611455  | 0 | -0.001443244 | 0            |
| 0 | 0            | 0 | -0.025297545 | 0 | 0.16808084  | 0 | -0.013273762 | 0            |
| 0 | -0.11207863  | 0 | -0.00595854  | 0 | 0           | 0 | 0            | 0.075254345  |
| 0 | 0            | 0 | -0.015178897 | 0 | 0.13001667  | 0 | 0            | -0.017329416 |
| 0 | -0.10942853  | 0 | 0            | 0 | 0           | 0 | -0.007186913 | 0.073803794  |
| 0 | -0.10923985  | 0 | 0            | 0 | 0           | 0 | 0            | 0.092772696  |
| 0 | -0.048392491 | 0 | -0.049997892 | 0 | 0.1260638   | 0 | 0            | 0.024579582  |
| 0 | -0.048357349 | 0 | -0.049927719 | 0 | 0.12598563  | 0 | -0.001219709 | 0.002153149  |
| 0 | -0.048036785 | 0 | -0.049986001 | 0 | 0.1262753   | 0 | -0.001198901 | 0            |
| 0 | -0.11122509  | 0 | -0.005813082 | 0 | 0           | 0 | 0            | 0            |
| 0 | -0.10858078  | 0 | 0            | 0 | 0           | 0 | -0.006273736 | 0            |
| 0 | -0.052799536 | 0 | -0.049159087 | 0 | 0.11875674  | 0 | -0.006598151 | 0.036526077  |
| 0 | -0.052882244 | 0 | 0            | 0 | 0.10629977  | 0 | -0.015027117 | 0.01742007   |
| 0 | -0.052334087 | 0 | 0            | 0 | 0.10667704  | 0 | -0.014828607 | 0            |
| 0 | 0            | 0 | -0.037390621 | 0 | 0.16700376  | 0 | 0            | -0.041176651 |
| 0 | 0            | 0 | -0.037270452 | 0 | 0.16688435  | 0 | 0            | 0            |
| 0 | -0.053015282 | 0 | 0            | 0 | 0.10522758  | 0 | 0            | 0.029802375  |
| 0 | -0.062839444 | 0 | 0            | 0 | 0.088144739 | 0 | -0.025936133 | 0.067700649  |
| 0 | -0.04634173  | 0 | 0            | 0 | 0.083192816 | 0 | -0.003397076 | 0.009742452  |
| 0 | -0.046408242 | 0 | 0            | 0 | 0.083207431 | 0 | 0            | 0.035435244  |
| 0 | -0.045862127 | 0 | 0            | 0 | 0.083534973 | 0 | -0.003295302 | 0            |
| 0 | 0            | 0 | -0.05432222  | 0 | 0.18207005  | 0 | -0.007654308 | -0.044268491 |
| 0 | 0            | 0 | -0.054240282 | 0 | 0.18201692  | 0 | -0.008194038 | 0            |
| 0 | 0            | 0 | -0.054656824 | 0 | 0.18190756  | 0 | 0            | -0.033223148 |
| 0 | -0.039210068 | 0 | 0            | 0 | 0.094013737 | 0 | 0.004702873  | 0.021802891  |
| 0 | 0            | 0 | -0.023611999 | 0 | 0.14048498  | 0 | -0.022622408 | 0            |
| 0 | 0            | 0 | -0.023555295 | 0 | 0.14028233  | 0 | -0.022312504 | -0.035413536 |
| 0 | -0.07033047  | 0 | 0            | 0 | 0           | 0 | -0.003020301 | 0            |
| 0 | 0            | 0 | 0            | 0 | 0.13299356  | 0 | -0.010046223 | 0            |
| 0 | 0            | 0 | 0            | 0 | 0.13296925  | 0 | -0.009635528 | -0.033961164 |
| 0 | 0            | 0 | 0            | 0 | 0.1323748   | 0 | 0            | -0.016641295 |
| 0 | 0            | 0 | -0.050505818 | 0 | 0.15631809  | 0 | -0.045686855 | 0.017032871  |
| 0 | 0            | 0 | 0            | 0 | 0.1241481   | 0 | -0.018474584 | 0.001673687  |
| 0 | 0            | 0 | -0.018811156 | 0 | 0.12741756  | 0 | 0            | -0.017153461 |
| 0 | 0            | 0 | -0.034029367 | 0 | 0.14625692  | 0 | -0.002494399 | 0            |
| 0 | 0            | 0 | -0.034258145 | 0 | 0.14646585  | 0 | 0            | -0.020779237 |
| 0 | 0            | 0 | -0.034146428 | 0 | 0.14632047  | 0 | -0.00199038  | -0.041191739 |



|   |              |   |              |   |             |   |              |   |              |
|---|--------------|---|--------------|---|-------------|---|--------------|---|--------------|
| 0 | -0.048134279 | 0 | -0.042582795 | 0 | 0.15017509  | 0 | -0.002350601 | 0 | 0.022488917  |
| 0 | -0.048743199 | 0 | -0.042100532 | 0 | 0.14847484  | 0 | 0            | 0 | 0.042970063  |
| 0 | -0.048929371 | 0 | -0.041921563 | 0 | 0.14793233  | 0 | 0            | 0 | 0.023361025  |
| 0 | -0.047754257 | 0 | -0.042541493 | 0 | 0.15018939  | 0 | -0.002274818 | 0 | 0            |
| 0 | -0.048371777 | 0 | -0.042052633 | 0 | 0.14845278  | 0 | 0            | 0 | 0            |
| 0 | 0            | 0 | -0.025990786 | 0 | 0.13246191  | 0 | -0.012470255 | 0 | -0.004814037 |
| 0 | -0.050061505 | 0 | -0.053503724 | 0 | 0.15730041  | 0 | -0.00317746  | 0 | 0.0221334    |
| 0 | -0.050097282 | 0 | -0.053629886 | 0 | 0.15720373  | 0 | 0            | 0 | 0.04159497   |
| 0 | -0.049501299 | 0 | -0.053605884 | 0 | 0.15778101  | 0 | -0.002902322 | 0 | 0            |
| 0 | -0.053386321 | 0 | -0.052767264 | 0 | 0.15068101  | 0 | -0.007177232 | 0 | 0.051659704  |
| 0 | -0.033909644 | 0 | -0.044874821 | 0 | 0.16157545  | 0 | -0.002749857 | 0 | 0            |
| 0 | 0            | 0 | 0            | 0 | 0.13759409  | 0 | -0.005141938 | 0 | 0.010037511  |
| 0 | 0            | 0 | -0.051315825 | 0 | 0.16121674  | 0 | -0.0020133   | 0 | -0.022507174 |
| 0 | -0.051350676 | 0 | 0            | 0 | 0.09386386  | 0 | -0.010798858 | 0 | 0.015437575  |
| 0 | -0.05081356  | 0 | 0            | 0 | 0.094240755 | 0 | -0.010623569 | 0 | 0            |
| 0 | 0            | 0 | 0            | 0 | 0.11583095  | 0 | -0.004206252 | 0 | -0.008289044 |
| 0 | 0            | 0 | -0.023012044 | 0 | 0.15212772  | 0 | -0.00921985  | 0 | 0            |
| 0 | -0.051480325 | 0 | 0            | 0 | 0.093087807 | 0 | 0            | 0 | 0.032884649  |
| 0 | 0            | 0 | 0            | 0 | 0.14254087  | 0 | -0.015711799 | 0 | -0.009872693 |
| 0 | -0.057415202 | 0 | 0            | 0 | 0.082920719 | 0 | -0.017485027 | 0 | 0.057512639  |
| 0 | -0.095683818 | 0 | 0.022451088  | 0 | 0           | 0 | 0            | 0 | 0.08258574   |
| 0 | -0.094613623 | 0 | 0.022705055  | 0 | 0           | 0 | 0            | 0 | 0            |
| 0 | 0            | 0 | -0.049103317 | 0 | 0.1480097   | 0 | -0.035761411 | 0 | 0.01077292   |
| 0 | -0.04818546  | 0 | 0            | 0 | 0.10980959  | 0 | -0.005109704 | 0 | 0.030914439  |
| 0 | -0.048236236 | 0 | 0            | 0 | 0.10947274  | 0 | 0            | 0 | 0.053574438  |
| 0 | -0.047439715 | 0 | 0            | 0 | 0.11031307  | 0 | -0.004729584 | 0 | 0            |
| 0 | -0.10672143  | 0 | 0            | 0 | 0           | 0 | 0            | 0 | 0.11878254   |
| 0 | -0.039779134 | 0 | 0            | 0 | 0.12509932  | 0 | 0.004351911  | 0 | 0.03942557   |
| 0 | -0.10663271  | 0 | 0            | 0 | 0           | 0 | 0.002638086  | 0 | 0.089030009  |
| 0 | -0.10563794  | 0 | 0            | 0 | 0           | 0 | 0.003776078  | 0 | 0            |
| 0 | -0.050701979 | 0 | 0            | 0 | 0.078723137 | 0 | -0.005817203 | 0 | 0.043457297  |
| 0 | 0            | 0 | -0.040721471 | 0 | 0.18077946  | 0 | -0.003882008 | 0 | 0            |
| 0 | 0            | 0 | -0.040776741 | 0 | 0.18081295  | 0 | -0.003604548 | 0 | -0.023229566 |
| 0 | 0            | 0 | -0.040940415 | 0 | 0.18075343  | 0 | 0            | 0 | -0.006848143 |
| 0 | -0.10102866  | 0 | 0.012340535  | 0 | 0           | 0 | 0.037818174  | 0 | 0.060215027  |
| 0 | -0.10077251  | 0 | 0.012176871  | 0 | 0           | 0 | 0.038107389  | 0 | 0            |
| 0 | -0.10575395  | 0 | 0            | 0 | 0           | 0 | 0.05286032   | 0 | 0            |
| 0 | -0.10597982  | 0 | 0            | 0 | 0           | 0 | 0.052525239  | 0 | 0.060742674  |
| 0 | 0            | 0 | -0.032137938 | 0 | 0.16386266  | 0 | -0.013546772 | 0 | 0.009962962  |
| 0 | -0.047496368 | 0 | -0.039430929 | 0 | 0.13319758  | 0 | 0            | 0 | 0.021631226  |
| 0 | 0            | 0 | -0.054833089 | 0 | 0.19291504  | 0 | -0.003644979 | 0 | -0.009978888 |
| 0 | -0.04690312  | 0 | -0.039571323 | 0 | 0.1337531   | 0 | 0            | 0 | 0            |
| 0 | -0.069964179 | 0 | 0.00226822   | 0 | 0           | 0 | -0.00505198  | 0 | 0            |
| 0 | -0.043782    | 0 | -0.043417001 | 0 | 0.1436347   | 0 | 0.005037153  | 0 | 0.016866805  |
| 0 | -0.10652254  | 0 | 0            | 0 | 0           | 0 | 0.045861554  | 0 | 0.032342354  |
| 0 | -0.043459002 | 0 | -0.043391326 | 0 | 0.14367678  | 0 | 0.005083586  | 0 | 0            |
| 0 | -0.042487187 | 0 | -0.044401801 | 0 | 0.14725636  | 0 | 0            | 0 | 0.039226289  |

|   |              |   |              |   |             |   |              |              |
|---|--------------|---|--------------|---|-------------|---|--------------|--------------|
| 0 | -0.093325097 | 0 | 0.026614676  | 0 | 0           | 0 | 0            | 0.063060692  |
| 0 | -0.059500242 | 0 | 0.042287766  | 0 | 0           | 0 | 0.041206013  | 0            |
| 0 | -0.092564216 | 0 | 0.026800222  | 0 | 0           | 0 | 0            | 0            |
| 0 | -0.048645062 | 0 | -0.050824899 | 0 | 0.14226676  | 0 | 0            | 0.044069437  |
| 0 | -0.047726786 | 0 | -0.051035222 | 0 | 0.14407913  | 0 | 0.001409954  | 0.041609071  |
| 0 | -0.048628039 | 0 | -0.050865738 | 0 | 0.14227488  | 0 | 0.000666156  | 0.020318601  |
| 0 | -0.048075034 | 0 | -0.05096531  | 0 | 0.14275129  | 0 | 0.000920114  | 0            |
| 0 | -0.033698678 | 0 | -0.042355325 | 0 | 0.14582432  | 0 | 0.001039623  | 0            |
| 0 | 0            | 0 | 0            | 0 | 0.12945846  | 0 | -0.01161423  | -0.009224999 |
| 0 | 0            | 0 | 0            | 0 | 0.14305396  | 0 | -0.005688498 | 0.009624254  |
| 0 | -0.10657554  | 0 | 0            | 0 | 0           | 0 | -0.007892251 | 0.071362462  |
| 0 | -0.10635636  | 0 | 0            | 0 | 0           | 0 | 0            | 0.0878972    |
| 0 | -0.10576739  | 0 | 0            | 0 | 0           | 0 | -0.00700353  | 0            |
| 0 | -0.046937354 | 0 | -0.03683416  | 0 | 0.11458966  | 0 | 0.005847004  | 0.020519897  |
| 0 | -0.046348358 | 0 | -0.036987268 | 0 | 0.1151408   | 0 | 0.006103651  | 0            |
| 0 | -0.046899651 | 0 | -0.036443543 | 0 | 0.11424039  | 0 | 0            | 0.05255995   |
| 0 | -0.087919461 | 0 | 0.022366467  | 0 | 0           | 0 | 0            | 0.056386641  |
| 0 | -0.046895795 | 0 | 0            | 0 | 0.097091674 | 0 | 0            | 0.056243664  |
| 0 | -0.046863256 | 0 | 0            | 0 | 0.097177079 | 0 | -0.001153608 | 0.028695078  |
| 0 | -0.086006401 | 0 | 0.020982762  | 0 | 0           | 0 | -0.004688193 | 0.054069702  |
| 0 | -0.046131463 | 0 | 0            | 0 | 0.097681866 | 0 | -0.000804239 | 0            |
| 0 | -0.08718906  | 0 | 0.022546069  | 0 | 0           | 0 | 0            | 0            |
| 0 | -0.086183399 | 0 | 0.020832597  | 0 | 0           | 0 | 0            | 0.078435741  |
| 0 | -0.085290598 | 0 | 0.021172834  | 0 | 0           | 0 | -0.004061178 | 0            |
| 0 | -0.084729629 | 0 | 0.045353773  | 0 | 0           | 0 | 0            | 0.044094597  |
| 0 | -0.084248477 | 0 | 0.045432265  | 0 | 0           | 0 | 0            | 0            |
| 0 | -0.048081562 | 0 | -0.048167946 | 0 | 0.12364686  | 0 | 0.005619898  | 0.044538869  |
| 0 | -0.10982141  | 0 | -0.00490335  | 0 | 0           | 0 | 0            | 0.11833086   |
| 0 | -0.1098006   | 0 | -0.004969166 | 0 | 0           | 0 | 0.001325918  | 0.090502079  |
| 0 | -0.10746989  | 0 | 0            | 0 | 0           | 0 | 0.000396246  | 0.11673945   |
| 0 | -0.038315486 | 0 | -0.045445198 | 0 | 0.13538883  | 0 | 0.016809978  | 0.024591881  |
| 0 | -0.10873739  | 0 | -0.004845132 | 0 | 0           | 0 | 0.002467367  | 0            |
| 0 | -0.052369236 | 0 | 0            | 0 | 0.103545    | 0 | -0.007204782 | 0.062271436  |
| 0 | -0.035301351 | 0 | 0            | 0 | 0.118103    | 0 | 0.011787467  | 0.031117133  |
| 0 | -0.099060928 | 0 | 0            | 0 | 0           | 0 | -0.004235819 | 0.063342527  |
| 0 | -0.098959142 | 0 | 0            | 0 | 0           | 0 | 0            | 0.084839223  |
| 0 | -0.097821382 | 0 | 0            | 0 | 0           | 0 | -0.003882291 | 0.088134267  |
| 0 | -0.098319665 | 0 | 0            | 0 | 0           | 0 | -0.003444656 | 0            |
| 0 | 0            | 0 | -0.038520526 | 0 | 0.16543989  | 0 | -0.000124696 | 0            |
| 0 | 0            | 0 | -0.038533856 | 0 | 0.1654452   | 0 | 0            | -0.002093066 |
| 0 | 0            | 0 | -0.038564447 | 0 | 0.16546071  | 0 | 0.000164501  | -0.023735042 |
| 0 | -0.093490305 | 0 | 0.028491114  | 0 | 0           | 0 | 0            | 0.060835818  |
| 0 | 0            | 0 | -0.03390651  | 0 | 0.15637054  | 0 | -0.005308596 | 0.004934988  |
| 0 | -0.046393881 | 0 | 0            | 0 | 0.082076288 | 0 | 0.003508013  | 0.057735085  |
| 0 | 0            | 0 | -0.05221389  | 0 | 0.17729088  | 0 | 1.58E-05     | -0.006411762 |
| 0 | 0            | 0 | 0.063150155  | 0 | 0           | 0 | 0            | 0            |
| 0 | 0            | 0 | 0.063132545  | 0 | 0           | 0 | 0            | -0.018526155 |

|   |              |   |              |   |             |   |              |   |              |
|---|--------------|---|--------------|---|-------------|---|--------------|---|--------------|
| 0 | 0            | 0 | 0.066179212  | 0 | 0           | 0 | -0.008523943 | 0 | 0            |
| 0 | -0.056725288 | 0 | 0.037516862  | 0 | 0           | 0 | -0.009265706 | 0 | 0            |
| 0 | 0            | 0 | -0.035959188 | 0 | 0.14685528  | 0 | 0.005035163  | 0 | -0.000613503 |
| 0 | 0            | 0 | 0            | 0 | 0.12985246  | 0 | -0.00184128  | 0 | 0.009808669  |
| 0 | -0.10860067  | 0 | -0.002625289 | 0 | 0           | 0 | -0.009155011 | 0 | 0.072888902  |
| 0 | -0.10738033  | 0 | 0            | 0 | 0           | 0 | -0.009759998 | 0 | 0.096914912  |
| 0 | -0.055341492 | 0 | 0.032104545  | 0 | 0           | 0 | -0.005419151 | 0 | 0            |
| 0 | -0.10856561  | 0 | -0.003083999 | 0 | 0           | 0 | 0            | 0 | 0.087458794  |
| 0 | -0.1077308   | 0 | -0.002523483 | 0 | 0           | 0 | -0.00826038  | 0 | 0            |
| 0 | -0.046127666 | 0 | 0.035898329  | 0 | 0           | 0 | 0.003523882  | 0 | 0            |
| 0 | -0.050934523 | 0 | 0            | 0 | 0.091507479 | 0 | -0.003275425 | 0 | 0.06106205   |
| 0 | -0.10204591  | 0 | -0.005233665 | 0 | 0           | 0 | -0.005281764 | 0 | 0.090865579  |
| 0 | -0.10243186  | 0 | -0.005069544 | 0 | 0           | 0 | -0.005251498 | 0 | 0.065759363  |
| 0 | -0.10243498  | 0 | -0.005340863 | 0 | 0           | 0 | 0            | 0 | 0.085974004  |
| 0 | -0.10005442  | 0 | 0            | 0 | 0           | 0 | -0.006169359 | 0 | 0.090483417  |
| 0 | -0.10163231  | 0 | -0.004978886 | 0 | 0           | 0 | -0.004433197 | 0 | 0            |
| 0 | -0.10673413  | 0 | 0            | 0 | 0           | 0 | 0            | 0 | 0.061239562  |
| 0 | -0.086473694 | 0 | 0.036249816  | 0 | 0           | 0 | 0.039883827  | 0 | 0            |
| 0 | -0.08666944  | 0 | 0.036301641  | 0 | 0           | 0 | 0.039601613  | 0 | 0.049934345  |
| 0 | -0.092601186 | 0 | 0.024680558  | 0 | 0           | 0 | 0            | 0 | 0.10646421   |
| 0 | -0.092586326 | 0 | 0.024793058  | 0 | 0           | 0 | -0.002129231 | 0 | 0.079778024  |
| 0 | -0.091573131 | 0 | 0.024973578  | 0 | 0           | 0 | -0.001122105 | 0 | 0            |
| 0 | -0.081118859 | 0 | 0.03206087   | 0 | 0           | 0 | 0.04454357   | 0 | 0            |
| 0 | -0.081250512 | 0 | 0.032122246  | 0 | 0           | 0 | 0.044292913  | 0 | 0.043108139  |
| 0 | -0.10469843  | 0 | 0            | 0 | 0           | 0 | -0.000315017 | 0 | 0.11288509   |
| 0 | -0.078322761 | 0 | 0.029505296  | 0 | 0           | 0 | 0.047604566  | 0 | 0.01328808   |
| 0 | -0.098438364 | 0 | 0.01391696   | 0 | 0           | 0 | 0.032292586  | 0 | 0.039500135  |
| 0 | -0.087410134 | 0 | 0.020581673  | 0 | 0           | 0 | 0            | 0 | 0.10414564   |
| 0 | -0.087401079 | 0 | 0.020473134  | 0 | 0           | 0 | 0.001659715  | 0 | 0.072941965  |
| 0 | -0.086242737 | 0 | 0.01941476   | 0 | 0           | 0 | 0.002267326  | 0 | 0.10153824   |
| 0 | -0.086454173 | 0 | 0.020650498  | 0 | 0           | 0 | 0.002579376  | 0 | 0            |
| 0 | 0            | 0 | 0.06963316   | 0 | 0           | 0 | 0.038694526  | 0 | -0.025402453 |
| 0 | 0            | 0 | 0.069746832  | 0 | 0           | 0 | 0.03855448   | 0 | 0            |
| 0 | -0.10411672  | 0 | 0            | 0 | 0           | 0 | 0.047403778  | 0 | 0.024812884  |
| 0 | -0.097488978 | 0 | 0            | 0 | 0           | 0 | 0.003101726  | 0 | 0.10630133   |
| 0 | -0.08277004  | 0 | 0.045693456  | 0 | 0           | 0 | 0            | 0 | 0.050801555  |
| 0 | -0.09185383  | 0 | 0.01227001   | 0 | 0           | 0 | 0.037836807  | 0 | 0.031012475  |
| 0 | -0.096823968 | 0 | 0            | 0 | 0           | 0 | 0.051287408  | 0 | 0.017924993  |
| 0 | 0            | 0 | 0.060889689  | 0 | 0           | 0 | 0            | 0 | 0.025495244  |
| 0 | 0            | 0 | 0.060850244  | 0 | 0           | 0 | 0.000424888  | 0 | -0.000962352 |
| 0 | 0            | 0 | 0.060798902  | 0 | 0           | 0 | 0.000474023  | 0 | 0            |
| 0 | -0.10645563  | 0 | -0.002038029 | 0 | 0           | 0 | -0.001804692 | 0 | 0.11353056   |
| 0 | 0            | 0 | 0            | 0 | 0           | 0 | 0            | 0 | -0.01571484  |
| 0 | 0            | 0 | 0            | 0 | 0           | 0 | -0.000677565 | 0 | -0.028359385 |
| 0 | 0            | 0 | 0            | 0 | 0           | 0 | -0.001018196 | 0 | 0            |
| 0 | -0.10053411  | 0 | -0.004445174 | 0 | 0           | 0 | 0.001881106  | 0 | 0.10744094   |
| 0 | 0            | 0 | 0.077354158  | 0 | 0           | 0 | 0            | 0 | -0.021065531 |

|   |              |   |              |   |            |   |              |              |
|---|--------------|---|--------------|---|------------|---|--------------|--------------|
| 0 | -0.076837057 | 0 | 0.042666422  | 0 | 0          | 0 | 0            | 0.046962162  |
| 0 | 0            | 0 | 0.064662235  | 0 | 0          | 0 | -0.010611583 | 0            |
| 0 | 0            | 0 | 0.064646326  | 0 | 0          | 0 | -0.010395917 | -0.017930661 |
| 0 | 0            | 0 | 0.058574262  | 0 | 0          | 0 | -0.00682975  | 0            |
| 0 | 0            | 0 | 0.063997655  | 0 | 0          | 0 | 0            | -0.005679672 |
| 0 | 0            | 0 | 0.058554049  | 0 | 0          | 0 | -0.006586131 | -0.019812675 |
| 0 | 0            | 0 | 0.058169717  | 0 | 0          | 0 | 0            | -0.00119567  |
| 0 | 0            | 0 | 0.061036463  | 0 | 0          | 0 | -0.008451562 | 0.00568878   |
| 0 | -0.084601783 | 0 | 0.035509387  | 0 | 0          | 0 | 0.082590413  | 0            |
| 0 | -0.084715444 | 0 | 0.035624254  | 0 | 0          | 0 | 0.082227074  | 0.069177787  |
| 0 | -0.090702911 | 0 | 0.024452198  | 0 | 0          | 0 | 0.077597871  | 0.023966658  |
| 0 | 0            | 0 | 0.025520296  | 0 | 0          | 0 | -0.006315155 | 0            |
| 0 | 0            | 0 | 0.025494376  | 0 | 0          | 0 | -0.006019019 | -0.024269726 |
| 0 | 0            | 0 | 0.025173999  | 0 | 0          | 0 | 0            | -0.011930782 |
| 0 | -0.1018233   | 0 | 0            | 0 | 0          | 0 | 0.090196851  | 0.016835164  |
| 0 | 0            | 0 | 0            | 0 | 0          | 0 | -0.002640541 | -0.014782781 |
| 0 | 0            | 0 | 0.035065748  | 0 | 0          | 0 | 0.022621844  | -0.039141273 |
| 0 | 0            | 0 | 0.070214997  | 0 | 0          | 0 | 0.033605487  | -0.047310526 |
| 0 | 0            | 0 | 0.064425257  | 0 | 0          | 0 | 0.038526028  | -0.049672272 |
| 0 | 0            | 0 | 0            | 0 | 0          | 0 | 0.006739537  | 0.003906312  |
| 0 | 0            | 0 | 0            | 0 | 0          | 0 | 0.054076848  | -0.082647884 |
| 0 | 0            | 0 | 0.056124177  | 0 | 0          | 0 | 0.000995968  | 0.023129295  |
| 0 | 0            | 0 | 0.061968541  | 0 | 0          | 0 | -0.002576814 | 0.024331122  |
| 0 | 0            | 0 | 0            | 0 | 0          | 0 | -0.000176829 | -0.014886953 |
| 0 | 0            | 0 | 0.025505353  | 0 | 0          | 0 | 0.001153976  | 0.012011252  |
| 0 | -0.082403745 | 0 | 0.037073104  | 0 | 0          | 0 | 0.075938044  | 0.017336211  |
| 0 | 0            | 0 | 0            | 0 | 0          | 0 | -0.003213452 | -0.018045012 |
| 0 | 0            | 0 | 0.023681279  | 0 | 0          | 0 | -0.005206145 | -0.006114084 |
| 0 | -0.077409098 | 0 | 0.033137396  | 0 | 0          | 0 | 0.079991981  | 0.011512579  |
| 0 | 0            | 0 | 0.027413916  | 0 | 0          | 0 | -0.00872812  | -0.005973086 |
| 0 | 0            | 0 | 0.068758592  | 0 | 0          | 0 | 0.074902151  | -0.053347094 |
| 0 | -0.072498052 | 0 | 0.059740211  | 0 | 0          | 0 | 0            | 0.079790272  |
| 0 | -0.047473485 | 0 | -0.042186547 | 0 | 0.15100066 | 0 | 0            | 0            |
| 0 | -0.048267181 | 0 | -0.035327215 | 0 | 0.13639967 | 0 | -0.017289806 | 0            |
| 0 | -0.061182492 | 0 | -0.033350342 | 0 | 0.12368387 | 0 | 0            | 0.020284413  |
| 0 | -0.060841278 | 0 | -0.033327892 | 0 | 0.12374441 | 0 | 0            | 0            |
| 0 | -0.049957585 | 0 | -0.058419655 | 0 | 0.16369503 | 0 | -0.008766264 | 0            |
| 0 | -0.055125039 | 0 | -0.058009101 | 0 | 0.15900257 | 0 | 0            | 0.008060715  |
| 0 | -0.054854989 | 0 | -0.058051903 | 0 | 0.15923719 | 0 | 0            | 0            |
| 0 | -0.06706243  | 0 | -0.054866581 | 0 | 0.13478112 | 0 | -0.021377158 | 0.022928147  |
| 0 | -0.066581217 | 0 | -0.05493922  | 0 | 0.13488298 | 0 | -0.021384124 | 0            |
| 0 | -0.051533225 | 0 | 0            | 0 | 0.11086721 | 0 | -0.009715142 | 0.015443043  |
| 0 | -0.051161583 | 0 | 0            | 0 | 0.11094839 | 0 | -0.009704093 | 0            |
| 0 | -0.052792794 | 0 | 0            | 0 | 0.10794766 | 0 | 0            | 0.016824686  |
| 0 | -0.054000872 | 0 | 0            | 0 | 0.10567077 | 0 | 0            | 0.035747877  |
| 0 | -0.052350075 | 0 | 0            | 0 | 0.10826779 | 0 | 0            | 0            |
| 0 | -0.04198946  | 0 | 0            | 0 | 0.11643265 | 0 | -0.0109601   | 0            |

|   |              |   |              |   |             |   |              |              |
|---|--------------|---|--------------|---|-------------|---|--------------|--------------|
| 0 | -0.073575434 | 0 | -0.054625156 | 0 | 0.1211406   | 0 | 0            | 0.047266489  |
| 0 | 0            | 0 | -0.039912646 | 0 | 0.18145049  | 0 | 0            | -0.041358952 |
| 0 | 0            | 0 | -0.039784971 | 0 | 0.181321    | 0 | 0            | 0            |
| 0 | 0            | 0 | -0.059014189 | 0 | 0.19839151  | 0 | -0.00921294  | -0.044843082 |
| 0 | 0            | 0 | -0.05892853  | 0 | 0.19833424  | 0 | -0.009757692 | 0            |
| 0 | 0            | 0 | -0.059412023 | 0 | 0.19817455  | 0 | 0            | -0.035980989 |
| 0 | 0            | 0 | -0.023836421 | 0 | 0.15037942  | 0 | -0.026539754 | 0            |
| 0 | 0            | 0 | -0.023776214 | 0 | 0.15017661  | 0 | -0.026232823 | -0.034651162 |
| 0 | 0            | 0 | 0            | 0 | 0.14513103  | 0 | -0.011754804 | 0            |
| 0 | 0            | 0 | 0            | 0 | 0.14510675  | 0 | -0.011348732 | -0.033649801 |
| 0 | 0            | 0 | 0            | 0 | 0.14437885  | 0 | 0            | -0.02010422  |
| 0 | 0            | 0 | 0            | 0 | 0.13389652  | 0 | -0.022375208 | 0.004650109  |
| 0 | 0            | 0 | -0.018218792 | 0 | 0.13494517  | 0 | 0            | -0.016826417 |
| 0 | 0            | 0 | -0.025390084 | 0 | 0.16655115  | 0 | -0.010832146 | 0            |
| 0 | -0.057393739 | 0 | 0            | 0 | 0.10136312  | 0 | -0.012602875 | 0.021553228  |
| 0 | -0.056771353 | 0 | 0            | 0 | 0.10179667  | 0 | -0.012354155 | 0            |
| 0 | -0.057531837 | 0 | 0            | 0 | 0.10043363  | 0 | 0            | 0.037170876  |
| 0 | -0.064982684 | 0 | 0            | 0 | 0.087574158 | 0 | -0.020925451 | 0.067430526  |
| 0 | 0            | 0 | -0.052824725 | 0 | 0.1586038   | 0 | -0.041367112 | 0.014944951  |
| 0 | -0.053203145 | 0 | -0.042108817 | 0 | 0.14359915  | 0 | 0            | 0.027818671  |
| 0 | -0.052537879 | 0 | -0.042272879 | 0 | 0.1442255   | 0 | 0            | 0            |
| 0 | -0.050033405 | 0 | -0.045458654 | 0 | 0.15252889  | 0 | 0.0032677    | 0.02379705   |
| 0 | -0.049199583 | 0 | -0.046095254 | 0 | 0.15488547  | 0 | 0            | 0.045772253  |
| 0 | -0.049651488 | 0 | -0.045427475 | 0 | 0.1525537   | 0 | 0.003358393  | 0            |
| 0 | -0.054503276 | 0 | -0.055276931 | 0 | 0.15404221  | 0 | 0            | 0.048764308  |
| 0 | -0.05502571  | 0 | -0.055132213 | 0 | 0.15300849  | 0 | -0.001295387 | 0.050646215  |
| 0 | -0.054490098 | 0 | -0.05525892  | 0 | 0.15405275  | 0 | -0.000406938 | 0.026324042  |
| 0 | -0.053853307 | 0 | -0.055385944 | 0 | 0.15460486  | 0 | -9.35E-05    | 0            |
| 0 | -0.035401467 | 0 | -0.045771275 | 0 | 0.15973192  | 0 | 7.26E-05     | 0            |
| 0 | -0.045394989 | 0 | -0.040947212 | 0 | 0.15344833  | 0 | -0.011659839 | 0            |
| 0 | -0.049091191 | 0 | -0.040815788 | 0 | 0.14991348  | 0 | 0            | 0.005678313  |
| 0 | -0.048883762 | 0 | -0.040862385 | 0 | 0.15010617  | 0 | 0            | 0            |
| 0 | -0.05569887  | 0 | -0.033077878 | 0 | 0.13108099  | 0 | -0.01943712  | 0.015244394  |
| 0 | -0.055275696 | 0 | -0.033047672 | 0 | 0.13116375  | 0 | -0.01943808  | 0            |
| 0 | -0.050533111 | 0 | -0.055760999 | 0 | 0.16241295  | 0 | -0.01141235  | 0.004372342  |
| 0 | -0.050228295 | 0 | -0.055811923 | 0 | 0.16267808  | 0 | -0.011361527 | 0            |
| 0 | -0.05060877  | 0 | -0.056244185 | 0 | 0.1620905   | 0 | 0            | 0.013644938  |
| 0 | -0.052505134 | 0 | 0            | 0 | 0.10496776  | 0 | 0            | 0.06194363   |
| 0 | -0.052463283 | 0 | 0            | 0 | 0.10513609  | 0 | -0.002371301 | 0.03532547   |
| 0 | -0.059949993 | 0 | -0.029963687 | 0 | 0.11894324  | 0 | 0            | 0.034661559  |
| 0 | 0            | 0 | 0            | 0 | 0.14075192  | 0 | -0.013413135 | -0.009205912 |
| 0 | -0.051640877 | 0 | 0            | 0 | 0.10569335  | 0 | -0.001940089 | 0            |
| 0 | -0.096533302 | 0 | 0.024394169  | 0 | 0           | 0 | 0            | 0.065455982  |
| 0 | -0.095702805 | 0 | 0.024610864  | 0 | 0           | 0 | 0            | 0            |
| 0 | -0.041098422 | 0 | 0            | 0 | 0.12572612  | 0 | 0.010348562  | 0.038444828  |
| 0 | -0.048318234 | 0 | 0            | 0 | 0.11340281  | 0 | -0.013543378 | 0.012843306  |
| 0 | -0.049635937 | 0 | 0            | 0 | 0.11102507  | 0 | -0.015280666 | 0.042381837  |

|   |              |   |              |   |             |   |              |   |              |
|---|--------------|---|--------------|---|-------------|---|--------------|---|--------------|
| 0 | -0.064689655 | 0 | -0.052422185 | 0 | 0.13347705  | 0 | -0.026780436 | 0 | 0.059082453  |
| 0 | -0.047830935 | 0 | 0            | 0 | 0.11374336  | 0 | -0.013390828 | 0 | 0            |
| 0 | -0.048414968 | 0 | 0            | 0 | 0.11247454  | 0 | 0            | 0 | 0.026336664  |
| 0 | -0.10863841  | 0 | 0            | 0 | 0           | 0 | -0.005451629 | 0 | 0.07300506   |
| 0 | -0.10849499  | 0 | 0            | 0 | 0           | 0 | 0            | 0 | 0.09332472   |
| 0 | 0            | 0 | -0.040954631 | 0 | 0.1793168   | 0 | -0.001223668 | 0 | 0            |
| 0 | 0            | 0 | -0.041054119 | 0 | 0.17934973  | 0 | 0            | 0 | -0.00194955  |
| 0 | 0            | 0 | -0.041004212 | 0 | 0.17934553  | 0 | -0.000961445 | 0 | -0.02296935  |
| 0 | -0.10780391  | 0 | 0            | 0 | 0           | 0 | -0.004542807 | 0 | 0            |
| 0 | 0            | 0 | -0.03455905  | 0 | 0.16669766  | 0 | -0.008424004 | 0 | 0.007981637  |
| 0 | 0            | 0 | -0.039231901 | 0 | 0.18305028  | 0 | -0.012024826 | 0 | -0.040943123 |
| 0 | 0            | 0 | -0.039105382 | 0 | 0.18295952  | 0 | -0.012523786 | 0 | 0            |
| 0 | 0            | 0 | -0.05665138  | 0 | 0.19282295  | 0 | -0.001088864 | 0 | -0.006125446 |
| 0 | 0            | 0 | -0.039843987 | 0 | 0.18285922  | 0 | 0            | 0 | -0.033576219 |
| 0 | 0            | 0 | -0.05707604  | 0 | 0.19833652  | 0 | -0.01189901  | 0 | -0.027326102 |
| 0 | -0.044836964 | 0 | -0.038421137 | 0 | 0.13728536  | 0 | -0.007494833 | 0 | 0            |
| 0 | -0.047586466 | 0 | -0.038262743 | 0 | 0.13466624  | 0 | 0            | 0 | 0.004242241  |
| 0 | -0.047331864 | 0 | -0.038318166 | 0 | 0.13490263  | 0 | 0            | 0 | 0            |
| 0 | -0.05120388  | 0 | -0.033994879 | 0 | 0.12441725  | 0 | -0.011718969 | 0 | 0.009488131  |
| 0 | -0.050846119 | 0 | -0.033970026 | 0 | 0.1245138   | 0 | -0.011752083 | 0 | 0            |
| 0 | -0.053801162 | 0 | -0.032145768 | 0 | 0.1171754   | 0 | 0            | 0 | 0.030698787  |
| 0 | 0            | 0 | 0            | 0 | 0.1413791   | 0 | -0.003066978 | 0 | 0.010966268  |
| 0 | -0.048999554 | 0 | -0.052961508 | 0 | 0.14679767  | 0 | -0.007264228 | 0 | 0.002916089  |
| 0 | -0.048698038 | 0 | -0.053010646 | 0 | 0.1470616   | 0 | -0.007231301 | 0 | 0            |
| 0 | -0.049073281 | 0 | -0.053272623 | 0 | 0.14658698  | 0 | 0            | 0 | 0.017561827  |
| 0 | 0            | 0 | 0            | 0 | 0.14674418  | 0 | -0.014098163 | 0 | -0.009582233 |
| 0 | 0            | 0 | -0.021812765 | 0 | 0.1481962   | 0 | -0.031034749 | 0 | 0.006667721  |
| 0 | -0.059020565 | 0 | -0.050682041 | 0 | 0.12660048  | 0 | -0.018092953 | 0 | 0.048847929  |
| 0 | -0.056774247 | 0 | 0            | 0 | 0.098644957 | 0 | -0.004631339 | 0 | 0.068062333  |
| 0 | -0.046902052 | 0 | 0            | 0 | 0.10028134  | 0 | -0.009262839 | 0 | 0.010970999  |
| 0 | -0.046424289 | 0 | 0            | 0 | 0.10062154  | 0 | -0.009135559 | 0 | 0            |
| 0 | -0.044990406 | 0 | 0            | 0 | 0.10382872  | 0 | -0.007485133 | 0 | 0.03377669   |
| 0 | -0.04699823  | 0 | 0            | 0 | 0.099641048 | 0 | 0            | 0 | 0.029606326  |
| 0 | -0.058542917 | 0 | 0.03556538   | 0 | 0           | 0 | -0.006630848 | 0 | 0            |
| 0 | -0.046926086 | 0 | -0.035057297 | 0 | 0.11415365  | 0 | 0            | 0 | 0.027324515  |
| 0 | -0.045953179 | 0 | -0.035892205 | 0 | 0.11635269  | 0 | -0.000571226 | 0 | 0.026430983  |
| 0 | -0.046887934 | 0 | -0.034983242 | 0 | 0.11406979  | 0 | -0.001460787 | 0 | 0.003544012  |
| 0 | -0.04653057  | 0 | -0.035059729 | 0 | 0.11440135  | 0 | -0.001421989 | 0 | 0            |
| 0 | -0.11209845  | 0 | -0.005619201 | 0 | 0           | 0 | -0.006520832 | 0 | 0.075404834  |
| 0 | -0.11208943  | 0 | -0.005956506 | 0 | 0           | 0 | 0            | 0 | 0.094384491  |
| 0 | -0.10945346  | 0 | 0            | 0 | 0           | 0 | -0.007502171 | 0 | 0.10001565   |
| 0 | -0.04837738  | 0 | -0.049912107 | 0 | 0.12598386  | 0 | -0.001512487 | 0 | 0.026040961  |
| 0 | -0.11119568  | 0 | -0.005511505 | 0 | 0           | 0 | -0.005588336 | 0 | 0            |
| 0 | -0.052904897 | 0 | 0            | 0 | 0.10630464  | 0 | -0.015349809 | 0 | 0.044056823  |
| 0 | 0            | 0 | -0.036976946 | 0 | 0.16711522  | 0 | -0.007941464 | 0 | -0.041020918 |
| 0 | 0            | 0 | -0.036852564 | 0 | 0.16702643  | 0 | -0.008441095 | 0 | 0            |
| 0 | 0            | 0 | -0.037377133 | 0 | 0.16700454  | 0 | 0            | 0 | -0.027748159 |

|   |              |   |              |   |             |   |              |   |              |
|---|--------------|---|--------------|---|-------------|---|--------------|---|--------------|
| 0 | -0.046370465 | 0 | 0            | 0 | 0.083200273 | 0 | -0.003757503 | 0 | 0.039009361  |
| 0 | 0            | 0 | -0.054305125 | 0 | 0.1820689   | 0 | -0.007877634 | 0 | -0.025781325 |
| 0 | 0            | 0 | -0.023611835 | 0 | 0.14049144  | 0 | -0.022632561 | 0 | 0.001326948  |
| 0 | 0            | 0 | 0            | 0 | 0.13299015  | 0 | -0.009932089 | 0 | -0.009366083 |
| 0 | 0            | 0 | -0.034113779 | 0 | 0.14631572  | 0 | -0.002269029 | 0 | -0.01855027  |
| 0 | -0.048090568 | 0 | -0.042612348 | 0 | 0.15032132  | 0 | -0.002544822 | 0 | 0.044532407  |
| 0 | -0.048904035 | 0 | -0.041754237 | 0 | 0.14799455  | 0 | -0.003286846 | 0 | 0.023472965  |
| 0 | -0.048943236 | 0 | -0.041899078 | 0 | 0.14790857  | 0 | 0            | 0 | 0.043258352  |
| 0 | -0.048315447 | 0 | -0.041909772 | 0 | 0.14853857  | 0 | -0.002992647 | 0 | 0            |
| 0 | -0.050080026 | 0 | -0.053482698 | 0 | 0.15728604  | 0 | -0.003444052 | 0 | 0.044127305  |
| 0 | -0.089111781 | 0 | 0.034559459  | 0 | 0           | 0 | 0.045513865  | 0 | 0            |
| 0 | -0.089298814 | 0 | 0.034616511  | 0 | 0           | 0 | 0.045219849  | 0 | 0.05132605   |
| 0 | -0.051376618 | 0 | 0            | 0 | 0.093871387 | 0 | -0.011131968 | 0 | 0.043196665  |
| 0 | -0.095697846 | 0 | 0.022462587  | 0 | 0           | 0 | 0            | 0 | 0.11315113   |
| 0 | -0.095685155 | 0 | 0.022410425  | 0 | 0           | 0 | 0.000693252  | 0 | 0.082557499  |
| 0 | -0.094633371 | 0 | 0.022599491  | 0 | 0           | 0 | 0.001734345  | 0 | 0            |
| 0 | -0.048207784 | 0 | 0            | 0 | 0.10981816  | 0 | -0.005446316 | 0 | 0.058816992  |
| 0 | -0.10665917  | 0 | 0            | 0 | 0           | 0 | 0.002306501  | 0 | 0.11648758   |
| 0 | 0            | 0 | -0.040743265 | 0 | 0.18079937  | 0 | -0.003851298 | 0 | -0.002890863 |
| 0 | -0.101042    | 0 | 0.012285535  | 0 | 0           | 0 | 0.037935108  | 0 | 0.039595351  |
| 0 | -0.10596179  | 0 | 0            | 0 | 0           | 0 | 0.052739571  | 0 | 0.025028287  |
| 0 | -0.047556137 | 0 | -0.03942833  | 0 | 0.13314062  | 0 | 0            | 0 | 0.047725715  |
| 0 | -0.047501525 | 0 | -0.039460068 | 0 | 0.13318701  | 0 | 0.000577538  | 0 | 0.021612395  |
| 0 | -0.046920236 | 0 | -0.039611871 | 0 | 0.13372858  | 0 | 0.000846811  | 0 | 0            |
| 0 | -0.093318785 | 0 | 0.027240237  | 0 | 0           | 0 | -0.010357597 | 0 | 0.06327661   |
| 0 | -0.043744231 | 0 | -0.043443077 | 0 | 0.14376305  | 0 | 0.004866429  | 0 | 0.036256201  |
| 0 | -0.092475531 | 0 | 0.027402523  | 0 | 0           | 0 | -0.009582914 | 0 | 0            |
| 0 | -0.093334069 | 0 | 0.026619886  | 0 | 0           | 0 | 0            | 0 | 0.08104194   |
| 0 | -0.048647984 | 0 | -0.050842936 | 0 | 0.14225895  | 0 | 0.00038304   | 0 | 0.04369753   |
| 0 | -0.10659867  | 0 | 0            | 0 | 0           | 0 | -0.008186339 | 0 | 0.095812489  |
| 0 | -0.046958388 | 0 | -0.036792493 | 0 | 0.11456764  | 0 | 0.005522444  | 0 | 0.047059966  |
| 0 | -0.087897507 | 0 | 0.022754206  | 0 | 0           | 0 | -0.006314553 | 0 | 0.056502186  |
| 0 | -0.08792971  | 0 | 0.02237427   | 0 | 0           | 0 | 0            | 0 | 0.078928369  |
| 0 | -0.046884638 | 0 | 0            | 0 | 0.097188059 | 0 | -0.001503981 | 0 | 0.057685628  |
| 0 | -0.087124708 | 0 | 0.022898549  | 0 | 0           | 0 | -0.005621536 | 0 | 0            |
| 0 | -0.086027045 | 0 | 0.021011813  | 0 | 0           | 0 | -0.005042013 | 0 | 0.083172613  |
| 0 | -0.084732086 | 0 | 0.045360076  | 0 | 0           | 0 | 0            | 0 | 0.053567252  |
| 0 | -0.10981716  | 0 | -0.004949334 | 0 | 0           | 0 | 0.000997554  | 0 | 0.11752714   |
| 0 | -0.099085894 | 0 | 0            | 0 | 0           | 0 | -0.004547437 | 0 | 0.089227009  |
| 0 | 0            | 0 | -0.038517552 | 0 | 0.16538685  | 0 | -8.35E-05    | 0 | -0.003283797 |
| 0 | 0            | 0 | 0.063632214  | 0 | 0           | 0 | -0.008102644 | 0 | 0            |
| 0 | 0            | 0 | 0.063616419  | 0 | 0           | 0 | -0.007885672 | 0 | -0.018353066 |
| 0 | 0            | 0 | 0.063146916  | 0 | 0           | 0 | 0            | 0 | -0.001436346 |
| 0 | -0.10861397  | 0 | -0.002605952 | 0 | 0           | 0 | -0.009451449 | 0 | 0.09731171   |
| 0 | -0.10244722  | 0 | -0.005050295 | 0 | 0           | 0 | -0.005561858 | 0 | 0.091257943  |
| 0 | -0.086677413 | 0 | 0.036250311  | 0 | 0           | 0 | 0.039756982  | 0 | 0.024758226  |
| 0 | -0.092594539 | 0 | 0.02483497   | 0 | 0           | 0 | -0.002521623 | 0 | 0.10915503   |

|   |              |   |              |   |            |              |              |              |
|---|--------------|---|--------------|---|------------|--------------|--------------|--------------|
| 0 | -0.081269013 | 0 | 0.032062854  | 0 | 0          | 0.044454958  | 0            | 0.01795058   |
| 0 | -0.087413824 | 0 | 0.020505661  | 0 | 0          | 0.001295882  | 0            | 0.10287669   |
| 0 | 0            | 0 | 0.069583062  | 0 | 0          | 0.038849866  | 0            | -0.050213408 |
| 0 | 0            | 0 | 0.060883579  | 0 | 0          | 0.000105129  | 0            | 0.025391496  |
| 0 | 0            | 0 | 0            | 0 | 0          | -0.000840567 | 0            | -0.014751795 |
| 0 | 0            | 0 | 0.064680443  | 0 | 0          | -0.010689253 | 0            | 0.006206955  |
| 0 | 0            | 0 | 0.058584718  | 0 | 0          | -0.006890658 | 0            | 0.005352134  |
| 0 | -0.084740022 | 0 | 0.035507162  | 0 | 0          | 0.082513774  | 0            | 0.016293393  |
| 0 | 0            | 0 | 0.025511052  | 0 | 0          | -0.006245648 | 0            | -0.005741547 |
| 0 | -0.047333238 | 0 | -0.041731272 | 0 | 0.15125788 | 0            | -0.00905936  | 0            |
| 0 | -0.053485721 | 0 | -0.040968721 | 0 | 0.14551737 | 0            | 0            | 0.009681644  |
| 0 | -0.053179324 | 0 | -0.041037709 | 0 | 0.14580289 | 0            | 0            | 0            |
| 0 | -0.058021378 | 0 | -0.035619062 | 0 | 0.13263227 | 0            | -0.014401849 | 0.016260767  |
| 0 | -0.057605466 | 0 | -0.035587618 | 0 | 0.13270664 | 0            | -0.014392061 | 0            |
| 0 | -0.061185794 | 0 | -0.033340372 | 0 | 0.12369331 | 0            | 0            | 0.037012968  |
| 0 | -0.055059162 | 0 | -0.057626875 | 0 | 0.15925436 | 0            | -0.008826992 | 0.008156616  |
| 0 | -0.05469147  | 0 | -0.057691971 | 0 | 0.15957463 | 0            | -0.008728862 | 0            |
| 0 | -0.055134151 | 0 | -0.058005    | 0 | 0.158998   | 0            | 0            | 0.021625244  |
| 0 | -0.066971626 | 0 | -0.054864569 | 0 | 0.13500873 | 0            | -0.021689196 | 0.058416709  |
| 0 | -0.051479189 | 0 | 0            | 0 | 0.1110127  | 0            | -0.009948863 | 0.041496957  |
| 0 | -0.052704223 | 0 | 0            | 0 | 0.10871838 | 0            | -0.010972965 | 0.016847485  |
| 0 | -0.052146256 | 0 | 0            | 0 | 0.1091098  | 0            | -0.010781916 | 0            |
| 0 | -0.05279244  | 0 | 0            | 0 | 0.10796138 | 0            | 0            | 0.034274327  |
| 0 | 0            | 0 | -0.039404708 | 0 | 0.18161372 | 0            | -0.009569962 | -0.041170673 |
| 0 | 0            | 0 | -0.039292072 | 0 | 0.18151219 | 0            | -0.010053577 | 0            |
| 0 | 0            | 0 | -0.039901853 | 0 | 0.18144115 | 0            | 0            | -0.030457175 |
| 0 | 0            | 0 | -0.058997343 | 0 | 0.1983898  | 0            | -0.009427994 | -0.027069651 |
| 0 | 0            | 0 | -0.023835395 | 0 | 0.15039986 | 0            | -0.026572554 | 0.004304156  |
| 0 | 0            | 0 | 0            | 0 | 0.14512736 | 0            | -0.011642537 | -0.009228553 |
| 0 | -0.057416435 | 0 | 0            | 0 | 0.10137114 | 0            | -0.012939058 | 0.049480456  |
| 0 | -0.053180278 | 0 | -0.042088714 | 0 | 0.14362147 | 0            | 0            | 0.050818481  |
| 0 | -0.053198737 | 0 | -0.042081945 | 0 | 0.14360942 | 0            | -0.000534315 | 0.027836494  |
| 0 | -0.052535808 | 0 | -0.042258649 | 0 | 0.14422291 | 0            | -0.000187127 | 0            |
| 0 | -0.049993434 | 0 | -0.045485433 | 0 | 0.15266202 | 0            | 0.003090304  | 0.043882739  |
| 0 | -0.054498338 | 0 | -0.055244    | 0 | 0.15405745 | 0            | -0.00070608  | 0.049450244  |
| 0 | -0.048997785 | 0 | -0.040199479 | 0 | 0.15016171 | 0            | -0.01172199  | 0.005813421  |
| 0 | -0.048674922 | 0 | -0.040293822 | 0 | 0.15046787 | 0            | -0.011649128 | 0            |
| 0 | -0.049100615 | 0 | -0.04080385  | 0 | 0.14989686 | 0            | 0            | 0.01644042   |
| 0 | -0.05564162  | 0 | -0.033113867 | 0 | 0.13127545 | 0            | -0.019718945 | 0.046210744  |
| 0 | -0.050550105 | 0 | -0.055741483 | 0 | 0.16239927 | 0            | -0.011656908 | 0.024614761  |
| 0 | -0.052486754 | 0 | 0            | 0 | 0.10514484 | 0            | -0.002723912 | 0.064557534  |
| 0 | -0.096509504 | 0 | 0.024880909  | 0 | 0          | 0            | -0.007725323 | 0.06560336   |
| 0 | -0.096530479 | 0 | 0.024416691  | 0 | 0          | 0            | 0            | 0.086959987  |
| 0 | -0.095631631 | 0 | 0.025050916  | 0 | 0          | 0            | -0.006925103 | 0            |
| 0 | -0.048339494 | 0 | 0            | 0 | 0.11341101 | 0            | -0.013860455 | 0.039224134  |
| 0 | -0.10866298  | 0 | 0            | 0 | 0          | 0            | -0.005763082 | 0.098910887  |
| 0 | 0            | 0 | -0.040972514 | 0 | 0.17933534 | 0            | -0.001213729 | -0.002178895 |



|   |              |   |              |   |            |   |              |   |              |
|---|--------------|---|--------------|---|------------|---|--------------|---|--------------|
| 0 | 0            | 0 | -0.039201847 | 0 | 0.18303944 | 0 | -0.012254867 | 0 | -0.021958504 |
| 0 | -0.047517738 | 0 | -0.037874555 | 0 | 0.13482193 | 0 | -0.007526518 | 0 | 0.004324331  |
| 0 | -0.047173006 | 0 | -0.03794381  | 0 | 0.13513847 | 0 | -0.007481433 | 0 | 0            |
| 0 | -0.047595995 | 0 | -0.038249738 | 0 | 0.13465059 | 0 | 0            | 0 | 0.019897785  |
| 0 | -0.051146905 | 0 | -0.034026455 | 0 | 0.12460276 | 0 | -0.011979928 | 0 | 0.037682758  |
| 0 | -0.049018122 | 0 | -0.052939849 | 0 | 0.14678168 | 0 | -0.007526033 | 0 | 0.024621532  |
| 0 | -0.04693049  | 0 | 0            | 0 | 0.10028339 | 0 | -0.009588979 | 0 | 0.038422688  |
| 0 | -0.046906851 | 0 | -0.034942329 | 0 | 0.11404866 | 0 | -0.001772273 | 0 | 0.02903781   |
| 0 | -0.11211201  | 0 | -0.00559987  | 0 | 0          | 0 | -0.006816486 | 0 | 0.10081396   |
| 0 | 0            | 0 | -0.036938777 | 0 | 0.16709732 | 0 | -0.008204044 | 0 | -0.018867214 |
| 0 | -0.048890603 | 0 | -0.041734217 | 0 | 0.14801302 | 0 | -0.003516398 | 0 | 0.043381951  |
| 0 | -0.089310638 | 0 | 0.034556131  | 0 | 0          | 0 | 0.045395845  | 0 | 0.023537476  |
| 0 | -0.095698486 | 0 | 0.022443463  | 0 | 0          | 0 | 0.000325105  | 0 | 0.11283241   |
| 0 | -0.047520773 | 0 | -0.039420174 | 0 | 0.13315782 | 0 | 0.000279189  | 0 | 0.046228666  |
| 0 | -0.093332832 | 0 | 0.027259537  | 0 | 0          | 0 | -0.010699731 | 0 | 0.09115405   |
| 0 | -0.087913774 | 0 | 0.022780792  | 0 | 0          | 0 | -0.00665513  | 0 | 0.085237453  |
| 0 | 0            | 0 | 0.06364799   | 0 | 0          | 0 | -0.008185894 | 0 | 0.006767115  |
| 0 | -0.053410852 | 0 | -0.040495372 | 0 | 0.14571584 | 0 | -0.009134071 | 0 | 0.009788831  |
| 0 | -0.052998675 | 0 | -0.040592168 | 0 | 0.14609741 | 0 | -0.009011775 | 0 | 0            |
| 0 | -0.053498469 | 0 | -0.040953677 | 0 | 0.14549623 | 0 | 0            | 0 | 0.02413848   |
| 0 | -0.057966632 | 0 | -0.035653424 | 0 | 0.1328173  | 0 | -0.01466936  | 0 | 0.045617489  |
| 0 | -0.055079186 | 0 | -0.057606291 | 0 | 0.15923656 | 0 | -0.009079407 | 0 | 0.029550698  |
| 0 | -0.052727444 | 0 | 0            | 0 | 0.10872125 | 0 | -0.011308368 | 0 | 0.044537804  |
| 0 | 0            | 0 | -0.039385216 | 0 | 0.18159142 | 0 | -0.009795624 | 0 | -0.021172396 |
| 0 | -0.053217973 | 0 | -0.042042127 | 0 | 0.1435803  | 0 | -0.000832224 | 0 | 0.052406591  |
| 0 | -0.049037104 | 0 | -0.040111512 | 0 | 0.15007591 | 0 | -0.012014161 | 0 | 0.029487169  |
| 0 | -0.096512018 | 0 | 0.024926337  | 0 | 0          | 0 | -0.008096567 | 0 | 0.09452248   |
| 0 | -0.047535867 | 0 | -0.037832865 | 0 | 0.13479093 | 0 | -0.007807571 | 0 | 0.027646792  |
| 0 | -0.053428794 | 0 | -0.040457685 | 0 | 0.14568815 | 0 | -0.009414378 | 0 | 0.032991255  |

| SE | bsnp_rs6469674 | SE | bsnp_rs13269857 | SE | bsnp_rs3020106 | SE | bsnp_rs3020119 | SE |
|----|----------------|----|-----------------|----|----------------|----|----------------|----|
| 0  | 0              | 0  | 0               | 0  | 0              | 0  | 0              | 0  |
| 0  | 0              | 0  | 0               | 0  | 0              | 0  | 0              | 0  |
| 0  | 0              | 0  | 0               | 0  | 0              | 0  | 0              | 0  |
| 0  | 0              | 0  | 0               | 0  | 0              | 0  | -0.087290098   | 0  |
| 0  | 0              | 0  | 0               | 0  | 0              | 0  | 0              | 0  |
| 0  | 0              | 0  | 0               | 0  | 0              | 0  | 0              | 0  |
| 0  | 0              | 0  | 0               | 0  | 0              | 0  | 0              | 0  |
| 0  | 0              | 0  | 0               | 0  | 0              | 0  | 0              | 0  |
| 0  | 0              | 0  | 0               | 0  | 0              | 0  | -0.028657805   | 0  |
| 0  | 0              | 0  | 0               | 0  | 0              | 0  | 0              | 0  |
| 0  | 0              | 0  | 0               | 0  | 0              | 0  | 0              | 0  |
| 0  | 0              | 0  | 0               | 0  | 0.023150804    | 0  | 0              | 0  |
| 0  | -0.017186321   | 0  | 0               | 0  | 0              | 0  | 0              | 0  |
| 0  | 0              | 0  | 0               | 0  | 0              | 0  | 0              | 0  |
| 0  | 0              | 0  | 0.011291565     | 0  | 0              | 0  | 0              | 0  |
| 0  | 0              | 0  | 0               | 0  | 0              | 0  | 0              | 0  |
| 0  | 0              | 0  | 0               | 0  | 0              | 0  | 0              | 0  |
| 0  | 0              | 0  | 0               | 0  | 0.044384529    | 0  | 0              | 0  |
| 0  | 0              | 0  | 0               | 0  | 0              | 0  | 0              | 0  |
| 0  | 0              | 0  | 0               | 0  | 0              | 0  | -0.099668738   | 0  |
| 0  | 0              | 0  | 0.036317703     | 0  | 0              | 0  | 0              | 0  |
| 0  | 0              | 0  | 0               | 0  | 0              | 0  | 0              | 0  |
| 0  | 0              | 0  | 0               | 0  | 0              | 0  | 0              | 0  |
| 0  | -0.025195981   | 0  | 0               | 0  | 0              | 0  | 0              | 0  |
| 0  | 0              | 0  | 0               | 0  | 0              | 0  | -0.061082867   | 0  |
| 0  | 0              | 0  | 0               | 0  | 0              | 0  | -0.040952426   | 0  |
| 0  | 0              | 0  | 0               | 0  | 0              | 0  | 0              | 0  |
| 0  | 0              | 0  | 0               | 0  | 0              | 0  | 0              | 0  |
| 0  | 0              | 0  | -0.027380251    | 0  | 0              | 0  | 0              | 0  |
| 0  | 0              | 0  | 0               | 0  | 0              | 0  | 0              | 0  |
| 0  | 0              | 0  | 0               | 0  | -0.014351751   | 0  | 0              | 0  |
| 0  | 0              | 0  | 0               | 0  | 0              | 0  | -0.056156547   | 0  |
| 0  | -0.011185948   | 0  | 0               | 0  | 0              | 0  | 0              | 0  |
| 0  | 0              | 0  | 0               | 0  | 0              | 0  | 0              | 0  |
| 0  | 0              | 0  | 0               | 0  | 0              | 0  | 0              | 0  |
| 0  | 0              | 0  | 0               | 0  | 0              | 0  | -0.09022107    | 0  |
| 0  | -0.044672839   | 0  | 0               | 0  | 0              | 0  | -0.090183881   | 0  |
| 0  | 0              | 0  | 0               | 0  | 0              | 0  | 0              | 0  |
| 0  | 0              | 0  | 0               | 0  | 0              | 0  | -0.076882849   | 0  |
| 0  | 0              | 0  | 0               | 0  | 0.007533663    | 0  | -0.085708078   | 0  |
| 0  | 0              | 0  | -0.003745623    | 0  | 0              | 0  | -0.088140592   | 0  |
| 0  | 0              | 0  | -0.02273571     | 0  | 0              | 0  | 0              | 0  |
| 0  | 0              | 0  | 0               | 0  | 0              | 0  | 0              | 0  |
| 0  | -0.015284154   | 0  | 0               | 0  | 0              | 0  | 0              | 0  |
| 0  | 0              | 0  | 0               | 0  | -0.010104548   | 0  | 0              | 0  |

|   |              |   |              |   |             |   |              |
|---|--------------|---|--------------|---|-------------|---|--------------|
| 0 | 0            | 0 | 0            | 0 | 0           | 0 | 0            |
| 0 | 0            | 0 | 0            | 0 | 0.02705456  | 0 | 0            |
| 0 | 0            | 0 | 0            | 0 | 0           | 0 | 0            |
| 0 | 0            | 0 | 0.017063875  | 0 | 0           | 0 | 0            |
| 0 | 0            | 0 | 0            | 0 | 0           | 0 | 0            |
| 0 | -0.005545849 | 0 | 0            | 0 | 0           | 0 | 0            |
| 0 | 0            | 0 | 0            | 0 | 0           | 0 | 0            |
| 0 | 0            | 0 | 0            | 0 | 0           | 0 | 0            |
| 0 | 0            | 0 | 0            | 0 | 0           | 0 | 0            |
| 0 | -0.017622532 | 0 | 0            | 0 | 0           | 0 | 0            |
| 0 | 0            | 0 | 0            | 0 | 0.008306719 | 0 | 0            |
| 0 | 0            | 0 | -0.002102992 | 0 | 0           | 0 | 0            |
| 0 | 0            | 0 | -0.22547705  | 0 | 0.24459213  | 0 | 0            |
| 0 | 0            | 0 | 0            | 0 | 0           | 0 | -0.046336603 |
| 0 | 0            | 0 | 0            | 0 | 0           | 0 | -0.043516078 |
| 0 | 0            | 0 | 0            | 0 | 0.042880285 | 0 | 0            |
| 0 | 0            | 0 | 0            | 0 | 0           | 0 | 0            |
| 0 | 0            | 0 | 0            | 0 | 0           | 0 | -0.027436969 |
| 0 | 0            | 0 | 0            | 0 | 0.032881463 | 0 | 0            |
| 0 | 0            | 0 | 0            | 0 | 0.025396141 | 0 | 0            |
| 0 | 0            | 0 | 0            | 0 | 0           | 0 | -0.040916922 |
| 0 | -0.025887201 | 0 | 0            | 0 | 0           | 0 | 0            |
| 0 | 0            | 0 | 0            | 0 | 0           | 0 | 0            |
| 0 | 0            | 0 | 0.027744521  | 0 | 0           | 0 | 0            |
| 0 | -0.025751547 | 0 | 0            | 0 | 0           | 0 | -0.032303219 |
| 0 | 0            | 0 | 0            | 0 | 0           | 0 | -0.032336697 |
| 0 | 0            | 0 | 0            | 0 | 0           | 0 | -0.036748029 |
| 0 | 0            | 0 | 0            | 0 | 0           | 0 | 0            |
| 0 | 0            | 0 | 0.013163647  | 0 | 0           | 0 | 0            |
| 0 | 0            | 0 | 0            | 0 | 0.015714258 | 0 | -0.024630068 |
| 0 | 0            | 0 | 0            | 0 | 0           | 0 | 0            |
| 0 | 0            | 0 | 0.019832703  | 0 | 0           | 0 | 0            |
| 0 | 0            | 0 | 0            | 0 | 0.058821595 | 0 | 0            |
| 0 | 0            | 0 | 0            | 0 | 0           | 0 | 0            |
| 0 | 0            | 0 | 0            | 0 | 0           | 0 | 0            |
| 0 | 0            | 0 | 0            | 0 | 0.040933285 | 0 | 0            |
| 0 | 0            | 0 | 0            | 0 | 0           | 0 | 0            |
| 0 | -0.018908358 | 0 | 0            | 0 | 0           | 0 | 0            |
| 0 | 0            | 0 | 0            | 0 | 0           | 0 | 0            |
| 0 | 0            | 0 | 0.002727584  | 0 | 0           | 0 | -0.027936864 |
| 0 | 0            | 0 | 0            | 0 | 0           | 0 | 0            |
| 0 | 0            | 0 | 0            | 0 | 0.034596038 | 0 | 0            |
| 0 | 0            | 0 | 0            | 0 | 0           | 0 | 0            |
| 0 | 0            | 0 | 0            | 0 | 0           | 0 | 0            |
| 0 | 0            | 0 | 0            | 0 | 0           | 0 | 0            |
| 0 | 0.010386832  | 0 | 0            | 0 | 0           | 0 | 0            |
| 0 | -0.014700968 | 0 | 0            | 0 | 0.022114866 | 0 | 0            |

|   |              |   |              |   |             |   |              |   |
|---|--------------|---|--------------|---|-------------|---|--------------|---|
| 0 | 0            | 0 | 0            | 0 | 0.022140471 | 0 | 0            | 0 |
| 0 | 0            | 0 | 0.021845248  | 0 | 0           | 0 | 0            | 0 |
| 0 | -0.016061012 | 0 | 0.010194848  | 0 | 0           | 0 | 0            | 0 |
| 0 | 0            | 0 | 0.010224076  | 0 | 0           | 0 | 0            | 0 |
| 0 | 0            | 0 | 0.017963415  | 0 | 0           | 0 | 0            | 0 |
| 0 | -0.017817365 | 0 | 0            | 0 | 0           | 0 | 0            | 0 |
| 0 | 0            | 0 | 0            | 0 | 0           | 0 | 0            | 0 |
| 0 | -0.017424205 | 0 | 0            | 0 | 0           | 0 | 0            | 0 |
| 0 | 0            | 0 | 0            | 0 | 0           | 0 | 0            | 0 |
| 0 | -0.027088151 | 0 | 0            | 0 | 0           | 0 | 0            | 0 |
| 0 | 0            | 0 | 0.049463658  | 0 | 0           | 0 | 0            | 0 |
| 0 | 0            | 0 | 0            | 0 | 0           | 0 | 0            | 0 |
| 0 | 0            | 0 | 0            | 0 | 0           | 0 | -0.057013665 | 0 |
| 0 | 0            | 0 | 0            | 0 | 0           | 0 | 0            | 0 |
| 0 | 0.077790904  | 0 | 0            | 0 | 0           | 0 | 0            | 0 |
| 0 | 0            | 0 | 0            | 0 | 0           | 0 | -0.070834008 | 0 |
| 0 | 0            | 0 | -0.13301965  | 0 | 0.17558246  | 0 | 0            | 0 |
| 0 | 0            | 0 | 0            | 0 | 0           | 0 | -0.081485443 | 0 |
| 0 | 0            | 0 | 0            | 0 | 0.042932484 | 0 | 0            | 0 |
| 0 | -0.020101586 | 0 | 0            | 0 | 0.042915513 | 0 | 0            | 0 |
| 0 | 0            | 0 | 0            | 0 | 0           | 0 | 0            | 0 |
| 0 | 0            | 0 | 0            | 0 | 0           | 0 | 0            | 0 |
| 0 | 0.019988972  | 0 | 0            | 0 | 0           | 0 | 0            | 0 |
| 0 | 0            | 0 | 0            | 0 | 0.023531719 | 0 | -0.095460815 | 0 |
| 0 | 0            | 0 | 0            | 0 | 0           | 0 | -0.10032337  | 0 |
| 0 | 0.031244913  | 0 | 0            | 0 | 0           | 0 | -0.10031866  | 0 |
| 0 | 0            | 0 | 0.034837031  | 0 | 0           | 0 | 0            | 0 |
| 0 | -0.021085979 | 0 | 0.034817475  | 0 | 0           | 0 | 0            | 0 |
| 0 | 0            | 0 | 0            | 0 | 0           | 0 | -0.090835439 | 0 |
| 0 | 0            | 0 | 0.010612411  | 0 | 0           | 0 | -0.097568455 | 0 |
| 0 | 0            | 0 | -0.014183568 | 0 | 0           | 0 | 0            | 0 |
| 0 | 0            | 0 | 0            | 0 | 0           | 0 | 0            | 0 |
| 0 | 0            | 0 | 0            | 0 | 0           | 0 | 0            | 0 |
| 0 | 0            | 0 | 0            | 0 | 0.000166188 | 0 | 0            | 0 |
| 0 | 0            | 0 | 0            | 0 | 0           | 0 | 0            | 0 |
| 0 | -0.009599958 | 0 | 0            | 0 | 0           | 0 | 0            | 0 |
| 0 | 0            | 0 | -0.22647616  | 0 | 0.20528433  | 0 | 0            | 0 |
| 0 | 0            | 0 | 0            | 0 | 0           | 0 | -0.075204365 | 0 |
| 0 | 0            | 0 | 0            | 0 | 0           | 0 | -0.043513042 | 0 |
| 0 | 0            | 0 | 0            | 0 | 0           | 0 | -0.041529861 | 0 |
| 0 | 0.067576559  | 0 | 0            | 0 | 0           | 0 | 0            | 0 |
| 0 | 0            | 0 | 0            | 0 | 0           | 0 | 0            | 0 |
| 0 | 0            | 0 | -0.025945108 | 0 | 0           | 0 | -0.040091603 | 0 |
| 0 | 0            | 0 | 0            | 0 | 0           | 0 | -0.065498633 | 0 |
| 0 | -0.028885158 | 0 | 0            | 0 | 0           | 0 | -0.065450169 | 0 |
| 0 | 0            | 0 | 0            | 0 | 0           | 0 | -0.04749178  | 0 |
| 0 | -0.027069366 | 0 | 0            | 0 | 0           | 0 | -0.04742309  | 0 |

|   |              |   |              |   |              |   |              |   |
|---|--------------|---|--------------|---|--------------|---|--------------|---|
| 0 | 0            | 0 | 0            | 0 | 0            | 0 | -0.051186868 | 0 |
| 0 | 0            | 0 | 0            | 0 | -0.012581855 | 0 | -0.040442131 | 0 |
| 0 | 0            | 0 | 0            | 0 | 0.00839511   | 0 | -0.059270586 | 0 |
| 0 | 0            | 0 | -0.003311655 | 0 | 0            | 0 | -0.061843942 | 0 |
| 0 | 0            | 0 | 0            | 0 | 0            | 0 | -0.041460012 | 0 |
| 0 | 0            | 0 | -0.025988473 | 0 | 0            | 0 | 0            | 0 |
| 0 | 0            | 0 | 0            | 0 | 0            | 0 | 0            | 0 |
| 0 | 0            | 0 | -0.020498656 | 0 | 0            | 0 | 0            | 0 |
| 0 | 0            | 0 | 0            | 0 | -0.012595102 | 0 | 0            | 0 |
| 0 | -0.010557818 | 0 | 0            | 0 | 0            | 0 | 0            | 0 |
| 0 | 0            | 0 | 0            | 0 | 0            | 0 | 0            | 0 |
| 0 | 0            | 0 | 0            | 0 | -0.006546981 | 0 | 0            | 0 |
| 0 | -0.007359117 | 0 | 0            | 0 | 0            | 0 | 0            | 0 |
| 0 | 0            | 0 | 0            | 0 | 0            | 0 | 0            | 0 |
| 0 | 0            | 0 | 0            | 0 | 0            | 0 | 0            | 0 |
| 0 | 0            | 0 | 0            | 0 | 0            | 0 | 0            | 0 |
| 0 | 0            | 0 | 0            | 0 | 0            | 0 | -0.062676981 | 0 |
| 0 | -0.034291968 | 0 | 0            | 0 | 0            | 0 | -0.062666442 | 0 |
| 0 | -0.013174646 | 0 | -0.028079584 | 0 | 0            | 0 | 0            | 0 |
| 0 | 0            | 0 | -0.028052219 | 0 | 0            | 0 | 0            | 0 |
| 0 | 0            | 0 | -0.009649959 | 0 | 0            | 0 | 0            | 0 |
| 0 | 0            | 0 | -0.027792044 | 0 | 0            | 0 | 0            | 0 |
| 0 | 0            | 0 | 0            | 0 | 0            | 0 | 0            | 0 |
| 0 | 0            | 0 | 0            | 0 | 0.004291285  | 0 | 0            | 0 |
| 0 | 0            | 0 | -0.021705513 | 0 | 0            | 0 | -0.05583588  | 0 |
| 0 | 0            | 0 | -0.20711596  | 0 | 0.20986191   | 0 | -0.090258682 | 0 |
| 0 | -0.012301357 | 0 | 0            | 0 | -0.015035492 | 0 | 0            | 0 |
| 0 | 0            | 0 | 0            | 0 | -0.015010496 | 0 | 0            | 0 |
| 0 | 0            | 0 | 0            | 0 | 0            | 0 | -0.058808929 | 0 |
| 0 | 0            | 0 | 0            | 0 | -0.014504711 | 0 | 0            | 0 |
| 0 | 0            | 0 | 0            | 0 | 0            | 0 | 0            | 0 |
| 0 | 0            | 0 | 0            | 0 | -0.008435485 | 0 | -0.055957466 | 0 |
| 0 | -0.011168864 | 0 | 0            | 0 | 0            | 0 | 0            | 0 |
| 0 | -0.010165596 | 0 | 0            | 0 | 0            | 0 | 0            | 0 |
| 0 | 0            | 0 | 0            | 0 | 0            | 0 | 0            | 0 |
| 0 | 0            | 0 | 0            | 0 | 0            | 0 | -0.083713293 | 0 |
| 0 | -0.042175735 | 0 | 0            | 0 | 0            | 0 | -0.08363785  | 0 |
| 0 | 0            | 0 | -0.008899895 | 0 | 0            | 0 | -0.092339713 | 0 |
| 0 | -0.046187496 | 0 | -0.008930348 | 0 | 0            | 0 | -0.092309866 | 0 |
| 0 | 0            | 0 | 0            | 0 | 0.002647483  | 0 | -0.089636559 | 0 |
| 0 | 0.004157207  | 0 | 0            | 0 | 0            | 0 | -0.090222416 | 0 |
| 0 | -0.044236467 | 0 | 0            | 0 | 0.00262073   | 0 | -0.089605244 | 0 |
| 0 | 0            | 0 | -0.011927458 | 0 | 0            | 0 | 0            | 0 |
| 0 | 0            | 0 | -0.21461798  | 0 | 0.19799879   | 0 | 0            | 0 |
| 0 | 0            | 0 | 0            | 0 | 0            | 0 | 0            | 0 |
| 0 | -0.00804758  | 0 | 0            | 0 | 0            | 0 | 0            | 0 |
| 0 | 0            | 0 | 0            | 0 | 0.001511474  | 0 | 0            | 0 |



|   |              |   |             |   |             |   |              |   |
|---|--------------|---|-------------|---|-------------|---|--------------|---|
| 0 | 0            | 0 | 0           | 0 | 0.037431971 | 0 | 0            | 0 |
| 0 | 0            | 0 | -0.2205137  | 0 | 0.24870424  | 0 | 0            | 0 |
| 0 | -0.014689396 | 0 | -0.2254716  | 0 | 0.24355041  | 0 | 0            | 0 |
| 0 | 0            | 0 | -0.22545352 | 0 | 0.24355981  | 0 | 0            | 0 |
| 0 | 0            | 0 | 0.020657161 | 0 | 0           | 0 | -0.04056714  | 0 |
| 0 | 0            | 0 | 0           | 0 | 0           | 0 | -0.047536494 | 0 |
| 0 | 0.018721489  | 0 | 0           | 0 | 0           | 0 | -0.047517589 | 0 |
| 0 | 0            | 0 | 0.010685278 | 0 | 0           | 0 | -0.044221667 | 0 |
| 0 | 0            | 0 | 0           | 0 | 0           | 0 | -0.050729664 | 0 |
| 0 | 0            | 0 | 0           | 0 | 0.047486561 | 0 | 0            | 0 |
| 0 | 0            | 0 | 0           | 0 | 0           | 0 | -0.049643833 | 0 |
| 0 | 0            | 0 | 0           | 0 | 0           | 0 | -0.040771395 | 0 |
| 0 | 0            | 0 | 0           | 0 | 0           | 0 | -0.044270377 | 0 |
| 0 | 0            | 0 | 0           | 0 | 0           | 0 | -0.043678081 | 0 |
| 0 | 0            | 0 | 0           | 0 | 0.043446813 | 0 | -0.042721189 | 0 |
| 0 | -0.034338713 | 0 | 0           | 0 | 0           | 0 | -0.032096449 | 0 |
| 0 | 0            | 0 | 0           | 0 | 0           | 0 | -0.032148902 | 0 |
| 0 | 0            | 0 | 0.023741267 | 0 | 0           | 0 | 0            | 0 |
| 0 | 0            | 0 | 0           | 0 | 0.039969041 | 0 | 0            | 0 |
| 0 | 0            | 0 | 0           | 0 | 0           | 0 | -0.040118656 | 0 |
| 0 | -0.015271198 | 0 | 0           | 0 | 0.041865333 | 0 | 0            | 0 |
| 0 | 0            | 0 | 0           | 0 | 0.041892502 | 0 | 0            | 0 |
| 0 | 0            | 0 | 0           | 0 | 0.046486511 | 0 | 0            | 0 |
| 0 | 0            | 0 | 0           | 0 | 0.045216561 | 0 | 0            | 0 |
| 0 | 0            | 0 | 0           | 0 | 0.044614939 | 0 | 0            | 0 |
| 0 | 0            | 0 | 0           | 0 | 0.072440607 | 0 | 0            | 0 |
| 0 | 0.062327263  | 0 | 0           | 0 | 0.072326113 | 0 | 0            | 0 |
| 0 | 0            | 0 | 0           | 0 | 0.018453748 | 0 | -0.022650139 | 0 |
| 0 | 0            | 0 | 0           | 0 | 0           | 0 | -0.035124567 | 0 |
| 0 | 0            | 0 | 0           | 0 | 0           | 0 | 0            | 0 |
| 0 | 0            | 0 | 0           | 0 | 0           | 0 | 0            | 0 |
| 0 | -0.034312892 | 0 | 0           | 0 | 0           | 0 | -0.04911581  | 0 |
| 0 | 0            | 0 | 0           | 0 | 0           | 0 | -0.049178713 | 0 |
| 0 | 0            | 0 | 0           | 0 | 0.040922124 | 0 | 0            | 0 |
| 0 | 0.034755881  | 0 | 0           | 0 | 0.04078644  | 0 | 0            | 0 |
| 0 | 0            | 0 | 0           | 0 | 0           | 0 | 0            | 0 |
| 0 | 0.002246789  | 0 | 0           | 0 | 0           | 0 | 0            | 0 |
| 0 | 0            | 0 | 0           | 0 | 0           | 0 | 0            | 0 |
| 0 | 0            | 0 | 0           | 0 | 0.037561267 | 0 | 0            | 0 |
| 0 | 0            | 0 | 0           | 0 | 0.032238699 | 0 | -0.035131147 | 0 |
| 0 | -0.023485151 | 0 | 0           | 0 | 0.023970829 | 0 | 0            | 0 |
| 0 | 0            | 0 | 0           | 0 | 0.024005574 | 0 | 0            | 0 |
| 0 | 0            | 0 | -0.1359406  | 0 | 0.19298838  | 0 | 0            | 0 |
| 0 | 0            | 0 | 0.031807638 | 0 | 0           | 0 | 0            | 0 |
| 0 | 0            | 0 | 0.005068419 | 0 | 0           | 0 | -0.02608443  | 0 |
| 0 | 0            | 0 | 0           | 0 | 0.040749358 | 0 | 0            | 0 |
| 0 | 0            | 0 | 0           | 0 | 0.038349545 | 0 | 0            | 0 |

|   |              |   |              |   |             |   |              |   |
|---|--------------|---|--------------|---|-------------|---|--------------|---|
| 0 | 0            | 0 | 0.023819296  | 0 | 0           | 0 | -0.041718736 | 0 |
| 0 | -0.030141639 | 0 | 0            | 0 | 0           | 0 | -0.042654703 | 0 |
| 0 | 0            | 0 | 0            | 0 | 0           | 0 | -0.04258406  | 0 |
| 0 | 0            | 0 | 0            | 0 | 0           | 0 | 0            | 0 |
| 0 | 0            | 0 | 0.024325175  | 0 | 0           | 0 | 0            | 0 |
| 0 | -0.025026708 | 0 | 0            | 0 | 0           | 0 | 0            | 0 |
| 0 | 0            | 0 | 0            | 0 | 0           | 0 | 0            | 0 |
| 0 | -0.016634796 | 0 | 0.026685201  | 0 | 0           | 0 | 0            | 0 |
| 0 | 0            | 0 | 0.026714838  | 0 | 0           | 0 | 0            | 0 |
| 0 | -0.024715262 | 0 | 0.011683503  | 0 | 0           | 0 | 0            | 0 |
| 0 | 0            | 0 | 0.011722074  | 0 | 0           | 0 | 0            | 0 |
| 0 | -0.023345159 | 0 | 0            | 0 | 0.012850726 | 0 | -0.028669276 | 0 |
| 0 | 0            | 0 | 0            | 0 | 0.012875532 | 0 | -0.02869466  | 0 |
| 0 | 0            | 0 | 0.026530998  | 0 | 0           | 0 | 0            | 0 |
| 0 | 0            | 0 | 0            | 0 | 0           | 0 | -0.041337028 | 0 |
| 0 | -0.026921207 | 0 | 0            | 0 | 0           | 0 | 0            | 0 |
| 0 | 0            | 0 | 0            | 0 | 0           | 0 | 0            | 0 |
| 0 | 0            | 0 | 0            | 0 | 0           | 0 | 0            | 0 |
| 0 | 0            | 0 | 0.015255147  | 0 | 0           | 0 | -0.035873003 | 0 |
| 0 | -0.02612798  | 0 | 0            | 0 | 0           | 0 | 0            | 0 |
| 0 | 0            | 0 | 0            | 0 | 0           | 0 | 0            | 0 |
| 0 | 0            | 0 | 0.024766777  | 0 | 0           | 0 | 0            | 0 |
| 0 | -0.025822784 | 0 | 0            | 0 | 0           | 0 | 0            | 0 |
| 0 | 0            | 0 | 0.027000622  | 0 | 0           | 0 | 0            | 0 |
| 0 | -0.018625281 | 0 | 0            | 0 | 0           | 0 | -0.032317919 | 0 |
| 0 | -0.025828296 | 0 | -0.000409718 | 0 | 0           | 0 | -0.032422312 | 0 |
| 0 | 0            | 0 | -0.00037985  | 0 | 0           | 0 | -0.032447303 | 0 |
| 0 | 0            | 0 | 0.020385374  | 0 | 0           | 0 | 0            | 0 |
| 0 | 0            | 0 | 0.025543863  | 0 | 0           | 0 | 0            | 0 |
| 0 | 0.025358563  | 0 | 0.025419635  | 0 | 0           | 0 | 0            | 0 |
| 0 | 0            | 0 | 0            | 0 | 0           | 0 | 0            | 0 |
| 0 | 0            | 0 | 0            | 0 | 0           | 0 | 0            | 0 |
| 0 | -0.017211042 | 0 | 0            | 0 | 0           | 0 | 0            | 0 |
| 0 | 0            | 0 | 0            | 0 | 0           | 0 | 0            | 0 |
| 0 | -0.016312833 | 0 | 0            | 0 | 0.040328995 | 0 | 0            | 0 |
| 0 | 0            | 0 | 0            | 0 | 0.040358752 | 0 | 0            | 0 |
| 0 | 0            | 0 | 0            | 0 | 0           | 0 | -0.049025116 | 0 |
| 0 | -0.002072095 | 0 | 0            | 0 | 0           | 0 | 0            | 0 |
| 0 | 0            | 0 | 0            | 0 | 0           | 0 | 0            | 0 |
| 0 | 0.062286212  | 0 | 0            | 0 | 0           | 0 | -0.049226339 | 0 |
| 0 | 0            | 0 | 0.021252655  | 0 | 0           | 0 | 0            | 0 |
| 0 | 0            | 0 | 0.02139369   | 0 | 0           | 0 | 0            | 0 |
| 0 | -0.018392511 | 0 | 0            | 0 | 0           | 0 | 0            | 0 |
| 0 | 0            | 0 | 0            | 0 | 0           | 0 | 0            | 0 |
| 0 | 0            | 0 | 0.060959305  | 0 | 0           | 0 | 0            | 0 |
| 0 | 0.054992946  | 0 | 0.060858892  | 0 | 0           | 0 | 0            | 0 |
| 0 | 0            | 0 | 0            | 0 | 0.041859071 | 0 | 0            | 0 |



|   |              |   |              |   |             |   |              |   |
|---|--------------|---|--------------|---|-------------|---|--------------|---|
| 0 | 0            | 0 | 0            | 0 | 0           | 0 | 0            | 0 |
| 0 | 0            | 0 | 0            | 0 | 0           | 0 | 0            | 0 |
| 0 | 0            | 0 | 0            | 0 | 0           | 0 | 0            | 0 |
| 0 | 0.029351114  | 0 | 0            | 0 | 0           | 0 | 0            | 0 |
| 0 | -0.031908455 | 0 | 0            | 0 | 0           | 0 | 0            | 0 |
| 0 | -0.014865963 | 0 | 0            | 0 | 0.033604736 | 0 | 0            | 0 |
| 0 | 0            | 0 | 0            | 0 | 0.033589374 | 0 | 0            | 0 |
| 0 | 0            | 0 | 0            | 0 | 0           | 0 | 0            | 0 |
| 0 | 0.018582387  | 0 | 0            | 0 | 0           | 0 | 0            | 0 |
| 0 | 0            | 0 | 0            | 0 | 0           | 0 | -0.059269958 | 0 |
| 0 | 0            | 0 | 0            | 0 | 0           | 0 | 0            | 0 |
| 0 | -0.032372631 | 0 | 0            | 0 | 0           | 0 | 0            | 0 |
| 0 | -0.019157059 | 0 | 0            | 0 | 0.022109952 | 0 | 0            | 0 |
| 0 | -0.017079094 | 0 | 0.021264098  | 0 | 0           | 0 | 0            | 0 |
| 0 | 0            | 0 | 0.021296738  | 0 | 0           | 0 | 0            | 0 |
| 0 | -0.016175365 | 0 | 0.016928808  | 0 | 0           | 0 | 0            | 0 |
| 0 | 0            | 0 | 0.016909284  | 0 | 0           | 0 | 0            | 0 |
| 0 | 0            | 0 | 0.022349142  | 0 | 0           | 0 | 0            | 0 |
| 0 | -0.023356969 | 0 | 0.010186607  | 0 | 0           | 0 | 0            | 0 |
| 0 | -0.017833915 | 0 | 0            | 0 | 0           | 0 | 0            | 0 |
| 0 | -0.027968154 | 0 | 0            | 0 | 0           | 0 | 0            | 0 |
| 0 | 0            | 0 | 0            | 0 | 0           | 0 | 0            | 0 |
| 0 | -0.031429904 | 0 | 0            | 0 | 0           | 0 | 0            | 0 |
| 0 | 0            | 0 | -0.21965927  | 0 | 0.23846562  | 0 | -0.10050523  | 0 |
| 0 | 0            | 0 | -0.009485173 | 0 | 0           | 0 | -0.056265056 | 0 |
| 0 | 0            | 0 | 0            | 0 | 0           | 0 | 0            | 0 |
| 0 | 0            | 0 | 0            | 0 | 0.005608622 | 0 | -0.057514611 | 0 |
| 0 | 0.077139931  | 0 | 0            | 0 | 0           | 0 | 0            | 0 |
| 0 | 0            | 0 | 0            | 0 | 0           | 0 | -0.057368685 | 0 |
| 0 | 0            | 0 | 0            | 0 | 0           | 0 | -0.056787803 | 0 |
| 0 | 0            | 0 | -0.23091833  | 0 | 0.22430337  | 0 | 0            | 0 |
| 0 | 0.050920644  | 0 | 0            | 0 | 0           | 0 | -0.06639437  | 0 |
| 0 | 0            | 0 | 0            | 0 | 0           | 0 | -0.066499653 | 0 |
| 0 | 0            | 0 | 0            | 0 | 0.016724849 | 0 | 0            | 0 |
| 0 | 0.085344662  | 0 | 0            | 0 | 0.01656017  | 0 | 0            | 0 |
| 0 | 0            | 0 | 0            | 0 | 0           | 0 | 0            | 0 |
| 0 | -0.028836479 | 0 | 0            | 0 | 0           | 0 | 0            | 0 |
| 0 | 0            | 0 | 0            | 0 | 0           | 0 | 0            | 0 |
| 0 | 0            | 0 | 0.000129197  | 0 | 0           | 0 | 0            | 0 |
| 0 | 0.079239109  | 0 | 0            | 0 | 0           | 0 | 0            | 0 |
| 0 | 0.07778777   | 0 | 0            | 0 | 0           | 0 | 0            | 0 |
| 0 | 0.077782385  | 0 | -1.96E-05    | 0 | 0           | 0 | 0            | 0 |
| 0 | 0            | 0 | 0            | 0 | 0           | 0 | -0.067622025 | 0 |
| 0 | 0            | 0 | -0.13324375  | 0 | 0.17434229  | 0 | 0            | 0 |
| 0 | -0.020230624 | 0 | -0.13325775  | 0 | 0.1743382   | 0 | 0            | 0 |
| 0 | 0            | 0 | 0            | 0 | 0           | 0 | -0.073652338 | 0 |
| 0 | 0            | 0 | 0            | 0 | 0.010056789 | 0 | -0.071489003 | 0 |

|   |              |   |              |   |             |   |              |   |
|---|--------------|---|--------------|---|-------------|---|--------------|---|
| 0 | 0            | 0 | 0            | 0 | 0           | 0 | -0.04714256  | 0 |
| 0 | 0            | 0 | -0.004999692 | 0 | 0           | 0 | -0.070570888 | 0 |
| 0 | 0            | 0 | 0            | 0 | 0.021515037 | 0 | -0.078317018 | 0 |
| 0 | 0            | 0 | 0            | 0 | 0           | 0 | -0.082039128 | 0 |
| 0 | 0.031750836  | 0 | 0            | 0 | 0           | 0 | -0.082047645 | 0 |
| 0 | 0            | 0 | 0            | 0 | 0           | 0 | 0            | 0 |
| 0 | 0            | 0 | 0            | 0 | 0           | 0 | -0.086563717 | 0 |
| 0 | 0            | 0 | 0            | 0 | 0.035085095 | 0 | -0.094465132 | 0 |
| 0 | 0.051095654  | 0 | 0            | 0 | 0.034982265 | 0 | -0.094478289 | 0 |
| 0 | 0            | 0 | 0.008481742  | 0 | 0           | 0 | -0.080086719 | 0 |
| 0 | 0.005096763  | 0 | 0            | 0 | 0.042940261 | 0 | 0            | 0 |
| 0 | 0            | 0 | -0.013065051 | 0 | 0           | 0 | 0            | 0 |
| 0 | 0            | 0 | 0            | 0 | 0           | 0 | -0.088307745 | 0 |
| 0 | 0.038518549  | 0 | 0            | 0 | 0           | 0 | -0.088368185 | 0 |
| 0 | 0            | 0 | 0            | 0 | 0           | 0 | 0            | 0 |
| 0 | 0            | 0 | 0            | 0 | 0.001639216 | 0 | 0            | 0 |
| 0 | 0            | 0 | 0.019831947  | 0 | 0           | 0 | -0.096628048 | 0 |
| 0 | -0.018578591 | 0 | 0            | 0 | 0           | 0 | 0            | 0 |
| 0 | 0.042203347  | 0 | 0.019741324  | 0 | 0           | 0 | -0.096640871 | 0 |
| 0 | 0            | 0 | 0            | 0 | 0.021061779 | 0 | -0.090546075 | 0 |
| 0 | 0            | 0 | -0.23130865  | 0 | 0.2118092   | 0 | -0.041979766 | 0 |
| 0 | -0.009856533 | 0 | 0            | 0 | 0           | 0 | -0.10032153  | 0 |
| 0 | 0.002478578  | 0 | 0.034840694  | 0 | 0           | 0 | 0            | 0 |
| 0 | 0            | 0 | 0.007126527  | 0 | 0           | 0 | -0.090601515 | 0 |
| 0 | 0            | 0 | -0.01324655  | 0 | 0           | 0 | 0            | 0 |
| 0 | 0            | 0 | -0.014680272 | 0 | 0           | 0 | 0            | 0 |
| 0 | 0            | 0 | -0.21459593  | 0 | 0.21805178  | 0 | -0.06336268  | 0 |
| 0 | 0            | 0 | 0            | 0 | 0.001655737 | 0 | 0            | 0 |
| 0 | 0            | 0 | 0            | 0 | 0           | 0 | 0            | 0 |
| 0 | 0            | 0 | 0            | 0 | -6.93E-05   | 0 | 0            | 0 |
| 0 | 0            | 0 | -0.23171978  | 0 | 0.21224354  | 0 | 0            | 0 |
| 0 | 0            | 0 | 0            | 0 | 0           | 0 | -0.060941064 | 0 |
| 0 | 0            | 0 | -0.00889203  | 0 | 0           | 0 | 0            | 0 |
| 0 | 0            | 0 | 0            | 0 | 0.00650403  | 0 | 0            | 0 |
| 0 | -0.002109317 | 0 | 0            | 0 | 0           | 0 | 0            | 0 |
| 0 | 0            | 0 | 0            | 0 | 0           | 0 | 0            | 0 |
| 0 | 0            | 0 | 0            | 0 | 0           | 0 | 0            | 0 |
| 0 | 0            | 0 | -0.22274252  | 0 | 0.20898888  | 0 | 0            | 0 |
| 0 | 0            | 0 | 0            | 0 | 0           | 0 | -0.080229937 | 0 |
| 0 | -0.030514226 | 0 | 0            | 0 | 0           | 0 | -0.080188596 | 0 |
| 0 | 0            | 0 | 0            | 0 | 0.02506866  | 0 | -0.073758184 | 0 |
| 0 | 0            | 0 | -0.024315219 | 0 | 0           | 0 | -0.042625395 | 0 |
| 0 | 0            | 0 | 0            | 0 | 0           | 0 | -0.050095156 | 0 |
| 0 | -0.027247293 | 0 | 0            | 0 | 0           | 0 | -0.050030374 | 0 |
| 0 | 0            | 0 | -0.21907109  | 0 | 0.21689447  | 0 | 0            | 0 |
| 0 | -0.012033093 | 0 | -0.22630006  | 0 | 0.2044441   | 0 | 0            | 0 |
| 0 | 0            | 0 | -0.22628494  | 0 | 0.20445469  | 0 | 0            | 0 |

|   |              |   |              |   |              |   |              |   |
|---|--------------|---|--------------|---|--------------|---|--------------|---|
| 0 | 0            | 0 | -0.22679347  | 0 | 0.20522591   | 0 | 0            | 0 |
| 0 | 0            | 0 | 0.010925219  | 0 | 0            | 0 | -0.074392898 | 0 |
| 0 | 0            | 0 | 0            | 0 | 0            | 0 | -0.047084147 | 0 |
| 0 | -0.023189765 | 0 | 0            | 0 | 0            | 0 | -0.047034094 | 0 |
| 0 | 0            | 0 | -0.22499783  | 0 | 0.20979994   | 0 | -0.057990313 | 0 |
| 0 | 0            | 0 | -0.018735701 | 0 | 0            | 0 | -0.040815817 | 0 |
| 0 | 0            | 0 | 0            | 0 | -0.010526081 | 0 | -0.043037887 | 0 |
| 0 | 0.061014702  | 0 | 0            | 0 | 0            | 0 | 0            | 0 |
| 0 | 0            | 0 | 0            | 0 | 0            | 0 | 0            | 0 |
| 0 | 0            | 0 | 0            | 0 | 0            | 0 | -0.043869524 | 0 |
| 0 | 0            | 0 | -0.027179896 | 0 | 0            | 0 | -0.046988797 | 0 |
| 0 | -0.028827825 | 0 | -0.027225908 | 0 | 0            | 0 | -0.046939597 | 0 |
| 0 | 0            | 0 | 0            | 0 | 0            | 0 | -0.042178032 | 0 |
| 0 | 0            | 0 | 0            | 0 | -0.004404929 | 0 | -0.041325634 | 0 |
| 0 | 0.076589165  | 0 | 0            | 0 | 0.019518329  | 0 | 0            | 0 |
| 0 | 0            | 0 | 0            | 0 | 0.019534762  | 0 | 0            | 0 |
| 0 | 0            | 0 | 0            | 0 | 0            | 0 | -0.056606508 | 0 |
| 0 | -0.026529102 | 0 | 0            | 0 | 0            | 0 | -0.056605465 | 0 |
| 0 | 0.068542886  | 0 | 0            | 0 | 0            | 0 | 0            | 0 |
| 0 | 0            | 0 | 0            | 0 | 0            | 0 | 0            | 0 |
| 0 | 0.069086632  | 0 | 0.003419297  | 0 | 0            | 0 | 0            | 0 |
| 0 | 0.065229804  | 0 | 0            | 0 | 0            | 0 | 0            | 0 |
| 0 | 0            | 0 | 0.003420687  | 0 | 0            | 0 | 0            | 0 |
| 0 | 0            | 0 | -0.006712849 | 0 | 0            | 0 | -0.067226397 | 0 |
| 0 | -0.030112805 | 0 | -0.006738012 | 0 | 0            | 0 | -0.067184367 | 0 |
| 0 | 0            | 0 | 0            | 0 | -0.013796777 | 0 | -0.047135436 | 0 |
| 0 | -0.027975443 | 0 | 0            | 0 | -0.01384202  | 0 | -0.047072064 | 0 |
| 0 | 0            | 0 | 0            | 0 | 0.005229794  | 0 | -0.064226713 | 0 |
| 0 | -0.027941993 | 0 | 0            | 0 | 0.005209186  | 0 | -0.064183316 | 0 |
| 0 | 0            | 0 | -0.025740989 | 0 | 0            | 0 | -0.040243394 | 0 |
| 0 | -0.006706942 | 0 | 0            | 0 | 0            | 0 | -0.065493317 | 0 |
| 0 | 0            | 0 | -0.012448789 | 0 | 0            | 0 | -0.051298585 | 0 |
| 0 | 0            | 0 | 0            | 0 | 0            | 0 | -0.047970165 | 0 |
| 0 | -0.027075871 | 0 | 0            | 0 | 0            | 0 | -0.047927817 | 0 |
| 0 | -0.003298349 | 0 | 0            | 0 | 0            | 0 | -0.047488784 | 0 |
| 0 | 0            | 0 | 0            | 0 | 0.001580022  | 0 | -0.0511876   | 0 |
| 0 | 0            | 0 | -0.21103843  | 0 | 0.20864264   | 0 | -0.094404541 | 0 |
| 0 | -0.045725489 | 0 | -0.21104538  | 0 | 0.20862012   | 0 | -0.094373685 | 0 |
| 0 | 0            | 0 | 0            | 0 | 0            | 0 | 0            | 0 |
| 0 | 0            | 0 | 0            | 0 | -0.012108185 | 0 | -0.040795608 | 0 |
| 0 | -0.012468501 | 0 | -0.026659361 | 0 | 0            | 0 | 0            | 0 |
| 0 | 0            | 0 | -0.026632431 | 0 | 0            | 0 | 0            | 0 |
| 0 | 0            | 0 | 0            | 0 | 0.009672152  | 0 | 0            | 0 |
| 0 | 0            | 0 | -0.21177128  | 0 | 0.20669608   | 0 | 0            | 0 |
| 0 | 0            | 0 | -0.026561307 | 0 | 0            | 0 | 0            | 0 |
| 0 | 0            | 0 | -0.004637891 | 0 | 0            | 0 | 0            | 0 |
| 0 | 0            | 0 | -0.023811114 | 0 | 0            | 0 | -0.062703747 | 0 |

|   |              |   |              |   |              |              |              |
|---|--------------|---|--------------|---|--------------|--------------|--------------|
| 0 | -0.03620788  | 0 | -0.023789387 | 0 | 0            | -0.062697549 | 0            |
| 0 | -0.009558859 | 0 | -0.021281835 | 0 | 0            | 0            | 0            |
| 0 | 0            | 0 | -0.021257514 | 0 | 0            | 0            | 0            |
| 0 | 0            | 0 | -0.020645657 | 0 | 0            | 0            | 0            |
| 0 | -0.011554688 | 0 | 0            | 0 | -0.013247498 | 0            | 0            |
| 0 | 0            | 0 | 0            | 0 | -0.01322388  | 0            | 0            |
| 0 | 0            | 0 | 0            | 0 | -0.012904296 | 0            | 0            |
| 0 | 0            | 0 | 0            | 0 | 0            | -0.066208878 | 0            |
| 0 | -0.010584837 | 0 | 0            | 0 | 0            | 0            | 0            |
| 0 | 0            | 0 | 0            | 0 | 0            | 0            | 0            |
| 0 | -0.013399964 | 0 | 0            | 0 | 0            | 0            | 0            |
| 0 | -0.03564706  | 0 | 0            | 0 | 0            | -0.066150225 | 0            |
| 0 | -0.008131563 | 0 | 0            | 0 | -0.00723487  | 0            | 0            |
| 0 | 0            | 0 | 0            | 0 | -0.007214642 | 0            | 0            |
| 0 | 0            | 0 | 0            | 0 | -0.010470746 | 0            | -0.062587531 |
| 0 | -0.007288031 | 0 | 0            | 0 | 0            | 0            | 0            |
| 0 | 0            | 0 | 0            | 0 | 0            | 0            | 0            |
| 0 | 0            | 0 | 0            | 0 | -0.006360548 | 0            | 0            |
| 0 | -0.015645142 | 0 | 0            | 0 | 0            | 0            | 0            |
| 0 | -0.035130607 | 0 | 0            | 0 | -0.01044962  | 0            | -0.062578862 |
| 0 | 0.035640733  | 0 | 0            | 0 | 0            | 0            | -0.062585999 |
| 0 | -0.013316668 | 0 | -0.028556544 | 0 | 0            | 0            | 0            |
| 0 | 0            | 0 | -0.028545014 | 0 | 0            | 0            | 0            |
| 0 | -0.021096981 | 0 | -0.028091661 | 0 | 0            | 0            | 0            |
| 0 | 0            | 0 | -0.20929654  | 0 | 0.2072944    | 0            | -0.080514182 |
| 0 | 0            | 0 | -0.010182123 | 0 | 0            | 0            | 0            |
| 0 | 0            | 0 | 0            | 0 | 0.003792866  | 0            | 0            |
| 0 | 0            | 0 | -0.020910637 | 0 | 0            | 0            | -0.058123194 |
| 0 | -0.012365266 | 0 | 0            | 0 | -0.015243716 | 0            | 0            |
| 0 | 0            | 0 | 0            | 0 | 0.011433003  | 0            | 0            |
| 0 | 0            | 0 | 0            | 0 | -0.015233333 | 0            | 0            |
| 0 | -0.016422086 | 0 | 0            | 0 | -0.015040726 | 0            | 0            |
| 0 | 0            | 0 | 0            | 0 | -0.007472766 | 0            | -0.058480185 |
| 0 | 0            | 0 | 0            | 0 | 0            | 0            | 0            |
| 0 | -0.00546774  | 0 | 0            | 0 | 0            | 0            | 0            |
| 0 | 0            | 0 | -0.003332838 | 0 | 0            | 0            | 0            |
| 0 | -0.012013537 | 0 | 0            | 0 | 0            | 0            | 0            |
| 0 | 0            | 0 | -0.012138118 | 0 | 0            | 0            | -0.084750819 |
| 0 | -0.043534786 | 0 | -0.012186237 | 0 | 0            | 0            | -0.084681494 |
| 0 | 0            | 0 | -0.18103039  | 0 | 0.21485903   | 0            | 0            |
| 0 | 0            | 0 | 0            | 0 | 0.000115438  | 0            | -0.083705422 |
| 0 | 0.003569491  | 0 | 0            | 0 | 0            | 0            | -0.083715059 |
| 0 | -0.042168084 | 0 | 0            | 0 | 7.06E-05     | 0            | -0.083633026 |
| 0 | 0.001390702  | 0 | -0.00889786  | 0 | 0            | 0            | -0.092339694 |
| 0 | 0.004977665  | 0 | 0            | 0 | 0.002654913  | 0            | -0.089636528 |
| 0 | 0            | 0 | -0.21459977  | 0 | 0.1969236    | 0            | 0            |
| 0 | -0.016171591 | 0 | -0.21458531  | 0 | 0.19694432   | 0            | 0            |

|   |              |   |              |   |              |   |              |
|---|--------------|---|--------------|---|--------------|---|--------------|
| 0 | 0            | 0 | -0.012795288 | 0 | 0            | 0 | 0            |
| 0 | -0.009474649 | 0 | -0.012760263 | 0 | 0            | 0 | 0            |
| 0 | 0            | 0 | -0.2144557   | 0 | 0.1974758    | 0 | 0            |
| 0 | 0.033976874  | 0 | 0            | 0 | 0            | 0 | 0            |
| 0 | 0            | 0 | 0            | 0 | 0.00075897   | 0 | 0            |
| 0 | -0.007955961 | 0 | 0            | 0 | 0.000791397  | 0 | 0            |
| 0 | 0            | 0 | 0            | 0 | 0.049368722  | 0 | 0            |
| 0 | 0.055181085  | 0 | 0            | 0 | 0.049222282  | 0 | 0            |
| 0 | 0            | 0 | -0.18089318  | 0 | 0.20791342   | 0 | 0            |
| 0 | -0.002581691 | 0 | -0.18219866  | 0 | 0.20599865   | 0 | 0            |
| 0 | 0            | 0 | -0.18219856  | 0 | 0.20600807   | 0 | 0            |
| 0 | 0            | 0 | 0.036020255  | 0 | 0            | 0 | 0            |
| 0 | 0.047117376  | 0 | 0.035888033  | 0 | 0            | 0 | 0            |
| 0 | 0            | 0 | 0            | 0 | 0.035080492  | 0 | 0            |
| 0 | 0            | 0 | -0.024241046 | 0 | 0            | 0 | 0            |
| 0 | 0.069043617  | 0 | -0.023805983 | 0 | 0            | 0 | 0            |
| 0 | -0.017112757 | 0 | -0.024214723 | 0 | 0            | 0 | 0            |
| 0 | 0            | 0 | 0            | 0 | 0            | 0 | 0            |
| 0 | 0.040124853  | 0 | 0            | 0 | 0            | 0 | 0            |
| 0 | 0            | 0 | 0.022193671  | 0 | 0            | 0 | 0            |
| 0 | 0.069424991  | 0 | 0            | 0 | -0.011141622 | 0 | 0            |
| 0 | 0            | 0 | 0            | 0 | -0.011538806 | 0 | 0            |
| 0 | -0.016139587 | 0 | 0            | 0 | -0.011512223 | 0 | 0            |
| 0 | 0.067405964  | 0 | 0            | 0 | 0            | 0 | 0            |
| 0 | 0            | 0 | 0            | 0 | 0.037777682  | 0 | 0            |
| 0 | 0.075493274  | 0 | 0            | 0 | 0.037641507  | 0 | 0            |
| 0 | -0.029252935 | 0 | 0            | 0 | 0            | 0 | 0            |
| 0 | 0            | 0 | -0.18065718  | 0 | 0.19914325   | 0 | 0            |
| 0 | -0.001769302 | 0 | 0            | 0 | 0.030947688  | 0 | 0            |
| 0 | 0            | 0 | 0            | 0 | 0.030959494  | 0 | 0            |
| 0 | -0.013323859 | 0 | 0            | 0 | 0.026866006  | 0 | 0            |
| 0 | 0            | 0 | 0.023975238  | 0 | 0            | 0 | 0            |
| 0 | 0.068422811  | 0 | 0.023853269  | 0 | 0            | 0 | 0            |
| 0 | -0.003580901 | 0 | 0.018295319  | 0 | 0            | 0 | 0            |
| 0 | 0            | 0 | 0.018317349  | 0 | 0            | 0 | 0            |
| 0 | -0.016818898 | 0 | 0.016826036  | 0 | 0            | 0 | 0            |
| 0 | -0.021939804 | 0 | 0            | 0 | 0            | 0 | 0            |
| 0 | -0.021067401 | 0 | 0            | 0 | 0            | 0 | 0            |
| 0 | 0            | 0 | -0.17635173  | 0 | 0.1794018    | 0 | 0            |
| 0 | -0.017005713 | 0 | -0.17637155  | 0 | 0.17939654   | 0 | 0            |
| 0 | 0            | 0 | -0.23510127  | 0 | 0.26655886   | 0 | -0.042022509 |
| 0 | 0            | 0 | -0.23712942  | 0 | 0.25664051   | 0 | -0.045278752 |
| 0 | 0            | 0 | -0.23059813  | 0 | 0.26398638   | 0 | 0            |
| 0 | -0.004391815 | 0 | 0            | 0 | 0.007235784  | 0 | 0            |
| 0 | -0.007861112 | 0 | -0.003199193 | 0 | 0            | 0 | 0            |
| 0 | 0            | 0 | -0.22276208  | 0 | 0.26594324   | 0 | 0            |
| 0 | 0            | 0 | 0            | 0 | 0.041780104  | 0 | -0.05188981  |

|   |              |   |             |   |             |   |              |   |
|---|--------------|---|-------------|---|-------------|---|--------------|---|
| 0 | 0            | 0 | -0.22314923 | 0 | 0.25925264  | 0 | -0.044182885 | 0 |
| 0 | 0            | 0 | -0.22688736 | 0 | 0.2620573   | 0 | 0            | 0 |
| 0 | 0            | 0 | -0.23826949 | 0 | 0.25161738  | 0 | -0.025800382 | 0 |
| 0 | 0            | 0 | 0           | 0 | 0.029147143 | 0 | -0.041464295 | 0 |
| 0 | -0.015247946 | 0 | -0.22330895 | 0 | 0.2609088   | 0 | 0            | 0 |
| 0 | 0            | 0 | -0.22328994 | 0 | 0.26091748  | 0 | 0            | 0 |
| 0 | 0            | 0 | -0.22236377 | 0 | 0.26163237  | 0 | 0            | 0 |
| 0 | 0            | 0 | -0.22417166 | 0 | 0.26151194  | 0 | 0            | 0 |
| 0 | 0            | 0 | -0.22309687 | 0 | 0.26204153  | 0 | 0            | 0 |
| 0 | -0.023911271 | 0 | -0.23144432 | 0 | 0.25136309  | 0 | 0            | 0 |
| 0 | 0            | 0 | -0.23141613 | 0 | 0.2513722   | 0 | 0            | 0 |
| 0 | 0            | 0 | -0.22375777 | 0 | 0.26042116  | 0 | 0            | 0 |
| 0 | 0.03407859   | 0 | -0.22373054 | 0 | 0.26024973  | 0 | 0            | 0 |
| 0 | 0            | 0 | -0.22667882 | 0 | 0.2522024   | 0 | -0.037128555 | 0 |
| 0 | 0            | 0 | -0.22565521 | 0 | 0.25680228  | 0 | 0            | 0 |
| 0 | 0            | 0 | 0.025332378 | 0 | 0           | 0 | -0.053136531 | 0 |
| 0 | 0            | 0 | 0           | 0 | 0           | 0 | -0.052068086 | 0 |
| 0 | 0            | 0 | 0.014614597 | 0 | 0           | 0 | -0.044000828 | 0 |
| 0 | 0            | 0 | 0           | 0 | 0           | 0 | -0.051006566 | 0 |
| 0 | 0            | 0 | -0.22177498 | 0 | 0.25512774  | 0 | 0            | 0 |
| 0 | 0            | 0 | -0.2224236  | 0 | 0.25438226  | 0 | 0            | 0 |
| 0 | 0            | 0 | 0           | 0 | 0           | 0 | -0.049340134 | 0 |
| 0 | 0            | 0 | 0           | 0 | 0           | 0 | -0.04754938  | 0 |
| 0 | 0.010591043  | 0 | 0           | 0 | 0           | 0 | -0.047531269 | 0 |
| 0 | 0            | 0 | 0           | 0 | 0.033711472 | 0 | -0.044214707 | 0 |
| 0 | -0.02876601  | 0 | 0           | 0 | 0.033681186 | 0 | -0.044174205 | 0 |
| 0 | -0.024348405 | 0 | -0.23491043 | 0 | 0.24246729  | 0 | -0.032046825 | 0 |
| 0 | 0            | 0 | -0.23488714 | 0 | 0.24247238  | 0 | -0.032070265 | 0 |
| 0 | 0            | 0 | 0           | 0 | 0.043783119 | 0 | -0.052593334 | 0 |
| 0 | 0            | 0 | 0           | 0 | 0.047672835 | 0 | -0.045912555 | 0 |
| 0 | 0            | 0 | 0           | 0 | 0           | 0 | -0.052986261 | 0 |
| 0 | 0            | 0 | 0           | 0 | 0.044473702 | 0 | -0.043706885 | 0 |
| 0 | 0            | 0 | 0           | 0 | 0           | 0 | -0.05493785  | 0 |
| 0 | -0.001141142 | 0 | 0           | 0 | 0           | 0 | -0.055892464 | 0 |
| 0 | 0            | 0 | 0           | 0 | 0           | 0 | -0.055895199 | 0 |
| 0 | 0            | 0 | 0           | 0 | 0.048863107 | 0 | -0.042037426 | 0 |
| 0 | 0            | 0 | 0           | 0 | 0.036750734 | 0 | -0.048657233 | 0 |
| 0 | 0            | 0 | 0           | 0 | 0.033081681 | 0 | -0.042534327 | 0 |
| 0 | 0.037546991  | 0 | 0           | 0 | 0.032957875 | 0 | -0.042540446 | 0 |
| 0 | 0            | 0 | 0           | 0 | 0.035584519 | 0 | -0.037295883 | 0 |
| 0 | -0.0308445   | 0 | 0.017666433 | 0 | 0           | 0 | -0.046451439 | 0 |
| 0 | 0            | 0 | 0.017701189 | 0 | 0           | 0 | -0.046492251 | 0 |
| 0 | 0            | 0 | 0           | 0 | 0.043671255 | 0 | 0            | 0 |
| 0 | 0.027699117  | 0 | 0           | 0 | 0.043558725 | 0 | 0            | 0 |
| 0 | 0            | 0 | 0           | 0 | 0.043863113 | 0 | 0            | 0 |
| 0 | -0.016004744 | 0 | -0.217881   | 0 | 0.25096388  | 0 | 0            | 0 |
| 0 | 0            | 0 | -0.21785999 | 0 | 0.25097369  | 0 | 0            | 0 |

|   |              |   |             |   |             |              |              |
|---|--------------|---|-------------|---|-------------|--------------|--------------|
| 0 | -0.035774888 | 0 | 0           | 0 | 0           | -0.04605445  | 0            |
| 0 | 0            | 0 | 0           | 0 | 0           | -0.046098682 | 0            |
| 0 | 0            | 0 | 0           | 0 | 0           | -0.050607314 | 0            |
| 0 | -0.04427107  | 0 | 0           | 0 | 0           | -0.050519045 | 0            |
| 0 | 0            | 0 | 0           | 0 | 0.046957916 | 0            | 0            |
| 0 | 0            | 0 | 0           | 0 | 0.042627982 | 0            | 0            |
| 0 | 0            | 0 | -0.21770566 | 0 | 0.25203563  | 0            | 0            |
| 0 | -0.01481826  | 0 | -0.22047577 | 0 | 0.24767526  | 0            | 0            |
| 0 | 0            | 0 | -0.22048556 | 0 | 0.24767009  | 0            | 0            |
| 0 | -0.034596362 | 0 | 0           | 0 | 0           | -0.051955654 | 0            |
| 0 | 0            | 0 | 0           | 0 | 0           | -0.052005658 | 0            |
| 0 | -0.034005962 | 0 | 0           | 0 | 0           | -0.051320656 | 0            |
| 0 | 0            | 0 | 0           | 0 | 0           | -0.05128622  | 0            |
| 0 | -0.022320784 | 0 | 0           | 0 | 0           | -0.04941469  | 0            |
| 0 | 0            | 0 | 0.023665901 | 0 | 0           | -0.051496744 | 0            |
| 0 | 0            | 0 | 0           | 0 | 0.042743315 | 0            | -0.050708946 |
| 0 | -0.033239086 | 0 | 0           | 0 | 0.042685877 | 0            | -0.050631904 |
| 0 | 0            | 0 | 0.016877659 | 0 | 0           | -0.044789439 | 0            |
| 0 | 0.028121973  | 0 | 0.016765933 | 0 | 0           | -0.044791996 | 0            |
| 0 | 0            | 0 | -0.13708071 | 0 | 0.20782112  | 0            | 0            |
| 0 | 0            | 0 | 0.019098738 | 0 | 0           | -0.048945925 | 0            |
| 0 | -0.022306495 | 0 | -0.22548132 | 0 | 0.24355164  | 0            | 0            |
| 0 | 0.062713013  | 0 | -0.13701272 | 0 | 0.20763484  | 0            | 0            |
| 0 | 0            | 0 | 0.027164954 | 0 | 0           | -0.044712903 | 0            |
| 0 | 0            | 0 | 0.025737691 | 0 | 0           | -0.043696007 | 0            |
| 0 | 0            | 0 | 0.019425002 | 0 | 0           | -0.038680314 | 0            |
| 0 | 0            | 0 | 0           | 0 | 0.035167881 | 0            | -0.033227536 |
| 0 | 0            | 0 | 0           | 0 | 0.050950165 | 0            | 0            |
| 0 | 0.020079623  | 0 | 0           | 0 | 0.050870896 | 0            | 0            |
| 0 | -0.038697458 | 0 | 0           | 0 | 0           | -0.042406159 | 0            |
| 0 | 0            | 0 | 0           | 0 | 0           | -0.042336561 | 0            |
| 0 | 0            | 0 | 0           | 0 | 0           | -0.049290905 | 0            |
| 0 | 0.015045479  | 0 | 0           | 0 | 0           | -0.049287747 | 0            |
| 0 | 0            | 0 | 0           | 0 | 0           | -0.049423046 | 0            |
| 0 | 0.013471897  | 0 | 0           | 0 | 0           | -0.049512941 | 0            |
| 0 | -0.023906213 | 0 | 0           | 0 | 0           | -0.04751738  | 0            |
| 0 | 0            | 0 | 0           | 0 | 0.044275649 | 0            | 0            |
| 0 | 0            | 0 | 0           | 0 | 0           | -0.051058103 | 0            |
| 0 | 0            | 0 | 0.02837876  | 0 | 0           | -0.041016356 | 0            |
| 0 | 0            | 0 | 0           | 0 | 0.047194521 | 0            | 0            |
| 0 | 0            | 0 | 0           | 0 | 0           | -0.04253679  | 0            |
| 0 | 0            | 0 | 0           | 0 | 0           | -0.042071659 | 0            |
| 0 | 0            | 0 | 0           | 0 | 0.01495726  | 0            | -0.027913136 |
| 0 | -0.03173171  | 0 | 0           | 0 | 0.014928567 | 0            | -0.027869853 |
| 0 | -0.026251352 | 0 | 0           | 0 | 0.046125618 | 0            | 0            |
| 0 | 0            | 0 | 0           | 0 | 0.046173613 | 0            | 0            |
| 0 | 0            | 0 | -0.23861404 | 0 | 0.23739379  | 0            | -0.0593967   |

|   |              |   |             |   |             |   |              |   |
|---|--------------|---|-------------|---|-------------|---|--------------|---|
| 0 | -0.020097376 | 0 | 0           | 0 | 0.037986811 | 0 | 0            | 0 |
| 0 | 0            | 0 | 0           | 0 | 0.038015592 | 0 | 0            | 0 |
| 0 | 0            | 0 | 0           | 0 | 0.045309093 | 0 | -0.043827247 | 0 |
| 0 | 0            | 0 | 0           | 0 | 0           | 0 | -0.043947621 | 0 |
| 0 | 0            | 0 | 0.027753042 | 0 | 0           | 0 | 0            | 0 |
| 0 | 0.018223547  | 0 | 0.027649961 | 0 | 0           | 0 | 0            | 0 |
| 0 | 0            | 0 | 0.027773539 | 0 | 0           | 0 | 0            | 0 |
| 0 | 0            | 0 | 0           | 0 | 0.046649394 | 0 | 0            | 0 |
| 0 | 0            | 0 | 0.026604285 | 0 | 0           | 0 | 0            | 0 |
| 0 | 0            | 0 | 0.001309759 | 0 | 0           | 0 | -0.031767744 | 0 |
| 0 | -0.034113017 | 0 | 0.001276214 | 0 | 0           | 0 | -0.031725121 | 0 |
| 0 | -0.017415354 | 0 | 0           | 0 | 0           | 0 | -0.032131242 | 0 |
| 0 | 0            | 0 | 0.024782195 | 0 | 0           | 0 | 0            | 0 |
| 0 | 0            | 0 | 0           | 0 | 0.043959137 | 0 | 0            | 0 |
| 0 | 0            | 0 | 0.023116247 | 0 | 0           | 0 | -0.04982172  | 0 |
| 0 | -0.033732    | 0 | 0.02305682  | 0 | 0           | 0 | -0.049752911 | 0 |
| 0 | 0            | 0 | 0           | 0 | 0           | 0 | -0.040314155 | 0 |
| 0 | -0.027238366 | 0 | 0           | 0 | 0.030056516 | 0 | -0.040578645 | 0 |
| 0 | 0            | 0 | 0           | 0 | 0.030027039 | 0 | -0.040498486 | 0 |
| 0 | -0.015293034 | 0 | 0           | 0 | 0.044225799 | 0 | 0            | 0 |
| 0 | 0            | 0 | 0           | 0 | 0.04421062  | 0 | 0            | 0 |
| 0 | 0            | 0 | 0.017671439 | 0 | 0           | 0 | -0.034056913 | 0 |
| 0 | -0.015514728 | 0 | 0           | 0 | 0.044017409 | 0 | 0            | 0 |
| 0 | 0            | 0 | 0           | 0 | 0.044046061 | 0 | 0            | 0 |
| 0 | -0.019883389 | 0 | 0           | 0 | 0.041861552 | 0 | 0            | 0 |
| 0 | 0            | 0 | 0           | 0 | 0.047062399 | 0 | 0            | 0 |
| 0 | -0.023813598 | 0 | 0           | 0 | 0.036273368 | 0 | 0            | 0 |
| 0 | 0            | 0 | 0           | 0 | 0.036236549 | 0 | 0            | 0 |
| 0 | 0            | 0 | 0           | 0 | 0.045303863 | 0 | 0            | 0 |
| 0 | -0.000513448 | 0 | 0           | 0 | 0.072439813 | 0 | 0            | 0 |
| 0 | 0            | 0 | 0           | 0 | 0           | 0 | 0            | 0 |
| 0 | 0            | 0 | 0           | 0 | 0           | 0 | 0            | 0 |
| 0 | 0.018439618  | 0 | 0           | 0 | 0           | 0 | 0            | 0 |
| 0 | 0            | 0 | -0.23601115 | 0 | 0.24623032  | 0 | 0            | 0 |
| 0 | 0            | 0 | 0           | 0 | 0           | 0 | 0            | 0 |
| 0 | 0.01066339   | 0 | 0           | 0 | 0           | 0 | 0            | 0 |
| 0 | 0            | 0 | 0           | 0 | 0           | 0 | 0            | 0 |
| 0 | 0            | 0 | 0           | 0 | 0           | 0 | 0            | 0 |
| 0 | 0.087476333  | 0 | -0.23579034 | 0 | 0.245838    | 0 | 0            | 0 |
| 0 | -0.03431661  | 0 | 0           | 0 | 0           | 0 | -0.049538346 | 0 |
| 0 | 0            | 0 | 0           | 0 | 0           | 0 | -0.049558163 | 0 |
| 0 | 0            | 0 | 0           | 0 | 0.042972497 | 0 | 0            | 0 |
| 0 | -0.019855208 | 0 | 0           | 0 | 0           | 0 | -0.049148706 | 0 |
| 0 | 0            | 0 | 0.024205559 | 0 | 0           | 0 | 0            | 0 |
| 0 | 0.032565113  | 0 | 0           | 0 | 0.042799641 | 0 | 0            | 0 |
| 0 | 0            | 0 | 0           | 0 | 0.04181649  | 0 | 0            | 0 |
| 0 | -0.021488422 | 0 | 0           | 0 | 0.040890683 | 0 | 0            | 0 |



|   |              |   |             |             |            |              |              |
|---|--------------|---|-------------|-------------|------------|--------------|--------------|
| 0 | 0.033007046  | 0 | 0           | 0.041842738 | 0          | 0            | 0            |
| 0 | 0            | 0 | 0           | 0           | 0          | -0.051403317 | 0            |
| 0 | -0.031214627 | 0 | 0           | 0           | 0          | 0            | 0            |
| 0 | 0            | 0 | 0           | 0           | 0          | 0            | 0            |
| 0 | 0.002447667  | 0 | 0           | 0           | 0          | 0            | 0            |
| 0 | 0.060814499  | 0 | 0           | 0           | 0          | -0.051603521 | 0            |
| 0 | 0            | 0 | 0.033897919 | 0           | 0          | 0            | 0            |
| 0 | 0.012434526  | 0 | 0.033821812 | 0           | 0          | 0            | 0            |
| 0 | 0            | 0 | 0.028714037 | 0           | 0          | 0            | 0            |
| 0 | -0.017159961 | 0 | 0           | 0.023978113 | 0          | 0            | 0            |
| 0 | -0.022146675 | 0 | 0.022183904 | 0           | 0          | 0            | 0            |
| 0 | 0            | 0 | 0.022217398 | 0           | 0          | 0            | 0            |
| 0 | 0            | 0 | 0           | 0           | 0          | 0            | 0            |
| 0 | -0.028891707 | 0 | 0.012972264 | 0           | 0          | -0.041665289 | 0            |
| 0 | 0            | 0 | 0.012935992 | 0           | 0          | -0.041597291 | 0            |
| 0 | 0.026138762  | 0 | 0           | 0           | 0          | 0            | 0            |
| 0 | -0.026552185 | 0 | 0.026181508 | 0           | 0          | 0            | 0            |
| 0 | 0            | 0 | 0.026230449 | 0           | 0          | 0            | 0            |
| 0 | 0            | 0 | 0           | 0.041461439 | 0          | 0            | 0            |
| 0 | 0            | 0 | 0.025204537 | 0           | 0          | -0.042529164 | 0            |
| 0 | -0.045472476 | 0 | 0           | 0           | 0          | -0.042657053 | 0            |
| 0 | 0            | 0 | 0           | 0           | 0          | 0            | 0            |
| 0 | 0            | 0 | 0.026538215 | 0           | 0          | 0            | 0            |
| 0 | 0            | 0 | 0.025586945 | 0           | 0          | 0            | 0            |
| 0 | -0.024915609 | 0 | 0.019059976 | 0           | 0          | 0            | 0            |
| 0 | 0            | 0 | 0.019020248 | 0           | 0          | 0            | 0            |
| 0 | -0.024486275 | 0 | 0           | 0           | 0          | 0            | 0            |
| 0 | 0            | 0 | 0           | 0           | 0          | 0            | 0            |
| 0 | -0.024120135 | 0 | 0           | 0           | 0          | 0            | 0            |
| 0 | 0            | 0 | 0           | 0           | 0          | 0            | 0            |
| 0 | -0.028621791 | 0 | 0           | 0           | 0          | 0            | 0            |
| 0 | 0            | 0 | -0.23336548 | 0           | 0.23672912 | 0            | -0.073871304 |
| 0 | -0.016346159 | 0 | 0.024192089 | 0           | 0          | 0            | 0            |
| 0 | 0            | 0 | 0.024223386 | 0           | 0          | 0            | 0            |
| 0 | -0.016626375 | 0 | 0.025973173 | 0           | 0          | 0            | 0            |
| 0 | -0.024018996 | 0 | 0.026677187 | 0           | 0          | 0            | 0            |
| 0 | 0            | 0 | 0.025953975 | 0           | 0          | 0            | 0            |
| 0 | -0.02151713  | 0 | 0.011688099 | 0           | 0          | 0            | 0            |
| 0 | -0.014964702 | 0 | 0           | 0.012854758 | 0          | -0.028685411 | 0            |
| 0 | -0.027082708 | 0 | 0           | 0           | 0          | 0            | 0            |
| 0 | 0            | 0 | 0           | 0           | 0          | 0            | 0            |
| 0 | 0            | 0 | 0.026707139 | 0           | 0          | 0            | 0            |
| 0 | -0.027082644 | 0 | 0           | 0           | 0          | 0            | 0            |
| 0 | 0            | 0 | 0           | 0           | 0          | 0            | 0            |
| 0 | 0.008319568  | 0 | 0           | 0           | 0          | 0            | 0            |
| 0 | 0            | 0 | 0           | 0           | 0          | -0.05829817  | 0            |
| 0 | -0.030139337 | 0 | 0           | 0           | 0          | 0            | 0            |



|   |              |   |              |             |            |              |   |
|---|--------------|---|--------------|-------------|------------|--------------|---|
| 0 | 0.085347558  | 0 | 0            | 0.018035093 | 0          | 0            | 0 |
| 0 | 0.069900561  | 0 | 0            | 0           | 0          | 0            | 0 |
| 0 | 0            | 0 | 0            | 0.021886184 | 0          | -0.067073552 | 0 |
| 0 | 0.060856126  | 0 | 0            | 0.021801181 | 0          | -0.066950901 | 0 |
| 0 | 0            | 0 | -0.009130047 | 0           | 0          | -0.056527822 | 0 |
| 0 | 0            | 0 | -0.0091698   | 0           | 0          | -0.056182143 | 0 |
| 0 | 0            | 0 | 0            | 0           | 0          | 0            | 0 |
| 0 | -0.030593959 | 0 | 0            | 0           | 0          | 0            | 0 |
| 0 | 0            | 0 | 0.001212145  | 0           | 0          | 0            | 0 |
| 0 | 0            | 0 | 0            | 0.006260859 | 0          | -0.058009016 | 0 |
| 0 | 0            | 0 | 0            | 0.006485749 | 0          | -0.057288843 | 0 |
| 0 | 0            | 0 | 0            | 0           | 0          | -0.057148151 | 0 |
| 0 | 0.077131266  | 0 | 0            | 0           | 0          | 0            | 0 |
| 0 | 0.07759938   | 0 | 0.001059721  | 0           | 0          | 0            | 0 |
| 0 | 0            | 0 | -0.23006516  | 0           | 0.22449803 | 0            | 0 |
| 0 | 0            | 0 | -0.23131792  | 0           | 0.22423961 | 0            | 0 |
| 0 | 0            | 0 | 0            | 0           | 0          | -0.064302956 | 0 |
| 0 | 0.048189072  | 0 | 0            | 0           | 0          | -0.064239236 | 0 |
| 0 | 0            | 0 | 0            | 0           | 0          | -0.071798835 | 0 |
| 0 | 0.049470695  | 0 | 0            | 0           | 0          | -0.068587028 | 0 |
| 0 | 0            | 0 | 0            | 0           | 0          | -0.068653252 | 0 |
| 0 | 0.053009503  | 0 | 0.00476729   | 0           | 0          | -0.066465963 | 0 |
| 0 | 0            | 0 | 0.004829725  | 0           | 0          | -0.066575755 | 0 |
| 0 | 0.028530561  | 0 | 0            | 0           | 0          | -0.066426452 | 0 |
| 0 | 0            | 0 | 0            | 0.032936875 | 0          | -0.077513183 | 0 |
| 0 | 0.050344326  | 0 | 0            | 0.032819198 | 0          | -0.077547133 | 0 |
| 0 | 0            | 0 | -0.22833661  | 0           | 0.22776139 | 0            | 0 |
| 0 | 0            | 0 | 0            | 0.016421588 | 0          | 0            | 0 |
| 0 | -0.024290923 | 0 | 0            | 0.016684642 | 0          | 0            | 0 |
| 0 | 0            | 0 | 0            | 0.016892874 | 0          | 0            | 0 |
| 0 | 0.085912306  | 0 | 0            | 0.016281221 | 0          | 0            | 0 |
| 0 | 0.085372071  | 0 | 0            | 0.016618576 | 0          | 0            | 0 |
| 0 | 0            | 0 | 0            | 0.030569453 | 0          | -0.085372436 | 0 |
| 0 | -0.028592355 | 0 | 0            | 0           | 0          | 0            | 0 |
| 0 | 0            | 0 | 0            | 0           | 0          | 0            | 0 |
| 0 | 0            | 0 | -0.000516867 | 0           | 0          | 0            | 0 |
| 0 | -0.027551821 | 0 | 0            | 0           | 0          | 0            | 0 |
| 0 | -0.028814019 | 0 | 8.01E-05     | 0           | 0          | 0            | 0 |
| 0 | 0            | 0 | -3.51E-05    | 0           | 0          | 0            | 0 |
| 0 | 0.079278765  | 0 | 0            | 0           | 0          | 0            | 0 |
| 0 | 0.078992199  | 0 | -0.000640575 | 0           | 0          | 0            | 0 |
| 0 | 0.077667813  | 0 | -0.000275996 | 0           | 0          | 0            | 0 |
| 0 | 0            | 0 | 0            | 0.012824906 | 0          | -0.068107527 | 0 |
| 0 | -0.019122013 | 0 | 0            | 0           | 0          | -0.051602617 | 0 |
| 0 | 0            | 0 | -0.002525922 | 0           | 0          | -0.067557826 | 0 |
| 0 | 0            | 0 | 0            | 0           | 0          | -0.051623568 | 0 |
| 0 | 0            | 0 | 0            | 0.011313968 | 0          | -0.074628325 | 0 |

|   |              |   |              |   |             |   |              |   |
|---|--------------|---|--------------|---|-------------|---|--------------|---|
| 0 | 0.003878327  | 0 | -0.13324066  | 0 | 0.17434503  | 0 | 0            | 0 |
| 0 | 0            | 0 | 0.017566107  | 0 | 0           | 0 | -0.079312287 | 0 |
| 0 | 0            | 0 | -0.003973914 | 0 | 0           | 0 | -0.073364194 | 0 |
| 0 | 0.041425984  | 0 | 0.017460725  | 0 | 0           | 0 | -0.079340694 | 0 |
| 0 | 0            | 0 | 0            | 0 | 0.010217425 | 0 | -0.047816603 | 0 |
| 0 | 0            | 0 | -0.005758621 | 0 | 0           | 0 | -0.046812489 | 0 |
| 0 | 0            | 0 | 0            | 0 | 0           | 0 | -0.047678696 | 0 |
| 0 | 0            | 0 | -0.23743495  | 0 | 0.21994529  | 0 | -0.044796974 | 0 |
| 0 | 0            | 0 | 0            | 0 | 0           | 0 | -0.085299171 | 0 |
| 0 | 0.026253576  | 0 | 0            | 0 | 0           | 0 | -0.085340699 | 0 |
| 0 | 0            | 0 | -0.21243274  | 0 | 0.23235928  | 0 | -0.077591079 | 0 |
| 0 | 0            | 0 | 0.015620616  | 0 | 0           | 0 | -0.085664202 | 0 |
| 0 | 0            | 0 | 0            | 0 | 0.032018263 | 0 | -0.086845325 | 0 |
| 0 | -0.015407216 | 0 | 0            | 0 | 0           | 0 | -0.082029926 | 0 |
| 0 | 0.054273164  | 0 | 0            | 0 | 0.031928879 | 0 | -0.086922822 | 0 |
| 0 | 0            | 0 | 0            | 0 | 0.010181811 | 0 | 0            | 0 |
| 0 | 0            | 0 | -0.00573274  | 0 | 0           | 0 | 0            | 0 |
| 0 | 0            | 0 | 0            | 0 | 0           | 0 | 0            | 0 |
| 0 | -0.001614495 | 0 | 0            | 0 | 0.035082944 | 0 | -0.094465174 | 0 |
| 0 | 0            | 0 | -0.22750024  | 0 | 0.21580756  | 0 | -0.042782948 | 0 |
| 0 | 0.078149934  | 0 | -0.22246063  | 0 | 0.235722    | 0 | 0            | 0 |
| 0 | 0            | 0 | -0.22239504  | 0 | 0.23567265  | 0 | 0            | 0 |
| 0 | 0            | 0 | 0.01608648   | 0 | 0           | 0 | -0.087279799 | 0 |
| 0 | 0.046207464  | 0 | 0.016004687  | 0 | 0           | 0 | -0.087351365 | 0 |
| 0 | 0            | 0 | -0.2316045   | 0 | 0.21086589  | 0 | -0.048727838 | 0 |
| 0 | -0.028229196 | 0 | -0.2316609   | 0 | 0.21087802  | 0 | -0.048676642 | 0 |
| 0 | 0            | 0 | -0.013710039 | 0 | 0           | 0 | 0            | 0 |
| 0 | -0.011467612 | 0 | 0            | 0 | 0           | 0 | -0.088303293 | 0 |
| 0 | 0            | 0 | 0            | 0 | 0.001260659 | 0 | 0            | 0 |
| 0 | -0.005106737 | 0 | 0.019825189  | 0 | 0           | 0 | -0.096628337 | 0 |
| 0 | 0            | 0 | -0.21638923  | 0 | 0.21650523  | 0 | -0.068557573 | 0 |
| 0 | -0.029115148 | 0 | -0.21639956  | 0 | 0.21649313  | 0 | -0.068515128 | 0 |
| 0 | 0            | 0 | -0.22167616  | 0 | 0.21636818  | 0 | -0.053295419 | 0 |
| 0 | 0            | 0 | -0.2310973   | 0 | 0.21186849  | 0 | -0.042186996 | 0 |
| 0 | 0            | 0 | 0            | 0 | 0           | 0 | -0.066222139 | 0 |
| 0 | -0.025940581 | 0 | 0            | 0 | 0           | 0 | -0.066192252 | 0 |
| 0 | 0            | 0 | -0.013751257 | 0 | 0           | 0 | 0            | 0 |
| 0 | 0            | 0 | 0            | 0 | 0.015900795 | 0 | -0.061829606 | 0 |
| 0 | 0            | 0 | -0.2164975   | 0 | 0.21960897  | 0 | 0            | 0 |
| 0 | 0            | 0 | 0            | 0 | 0.001485026 | 0 | 0            | 0 |
| 0 | -0.011227685 | 0 | -0.23152392  | 0 | 0.21141831  | 0 | 0            | 0 |
| 0 | 0            | 0 | -0.23150964  | 0 | 0.21142903  | 0 | 0            | 0 |
| 0 | 0            | 0 | -0.23221376  | 0 | 0.21218802  | 0 | 0            | 0 |
| 0 | 0            | 0 | 0.000143416  | 0 | 0           | 0 | -0.060947346 | 0 |
| 0 | -0.00324129  | 0 | -0.009219467 | 0 | 0           | 0 | 0            | 0 |
| 0 | 0            | 0 | -0.009196521 | 0 | 0           | 0 | 0            | 0 |
| 0 | 0            | 0 | -0.009003671 | 0 | 0           | 0 | 0            | 0 |

|   |              |   |              |   |              |   |              |   |
|---|--------------|---|--------------|---|--------------|---|--------------|---|
| 0 | 0            | 0 | 0            | 0 | 0.021847542  | 0 | -0.078387258 | 0 |
| 0 | -0.026948373 | 0 | 0            | 0 | 0.021828654  | 0 | -0.078346785 | 0 |
| 0 | 0            | 0 | 0            | 0 | 0.006742138  | 0 | 0            | 0 |
| 0 | 0            | 0 | 0            | 0 | 0.006385854  | 0 | 0            | 0 |
| 0 | -0.001298103 | 0 | 0            | 0 | 0.006367242  | 0 | 0            | 0 |
| 0 | 0            | 0 | -0.025543914 | 0 | 0            | 0 | -0.049543578 | 0 |
| 0 | -0.028892628 | 0 | -0.025597322 | 0 | 0            | 0 | -0.049487971 | 0 |
| 0 | -0.024703693 | 0 | 0            | 0 | 0            | 0 | 0            | 0 |
| 0 | -0.002090971 | 0 | 0            | 0 | 0            | 0 | 0            | 0 |
| 0 | 0            | 0 | 0            | 0 | 0            | 0 | 0            | 0 |
| 0 | 0            | 0 | -0.2261547   | 0 | 0.20884778   | 0 | -0.064745244 | 0 |
| 0 | -0.035736561 | 0 | -0.22612026  | 0 | 0.20883623   | 0 | -0.064735298 | 0 |
| 0 | -0.008131857 | 0 | -0.2227448   | 0 | 0.20830249   | 0 | 0            | 0 |
| 0 | 0            | 0 | -0.22273415  | 0 | 0.20831442   | 0 | 0            | 0 |
| 0 | 0            | 0 | -0.22280828  | 0 | 0.20897286   | 0 | 0            | 0 |
| 0 | 0            | 0 | 0.007448788  | 0 | 0            | 0 | -0.079476427 | 0 |
| 0 | -0.029290641 | 0 | 0.00742512   | 0 | 0            | 0 | -0.079437077 | 0 |
| 0 | -0.010795701 | 0 | 0            | 0 | 0            | 0 | -0.080223934 | 0 |
| 0 | 0            | 0 | 0            | 0 | -0.011738299 | 0 | -0.049742062 | 0 |
| 0 | -0.028013304 | 0 | 0            | 0 | -0.011784013 | 0 | -0.049681438 | 0 |
| 0 | 0            | 0 | -0.024263513 | 0 | 0            | 0 | -0.04266423  | 0 |
| 0 | -0.025207724 | 0 | -0.020541483 | 0 | 0            | 0 | -0.046736552 | 0 |
| 0 | 0            | 0 | -0.020502726 | 0 | 0            | 0 | -0.046781019 | 0 |
| 0 | 0.070960037  | 0 | 0            | 0 | 0.022904596  | 0 | 0            | 0 |
| 0 | 0            | 0 | -0.21886179  | 0 | 0.21622654   | 0 | 0            | 0 |
| 0 | 0            | 0 | 0            | 0 | 0.022995513  | 0 | 0            | 0 |
| 0 | 0            | 0 | 0            | 0 | 0            | 0 | -0.050433565 | 0 |
| 0 | -0.027251748 | 0 | 0            | 0 | 0            | 0 | -0.050399549 | 0 |
| 0 | -0.005317245 | 0 | 0            | 0 | 0            | 0 | -0.050090445 | 0 |
| 0 | -0.01216262  | 0 | -0.22666034  | 0 | 0.20436861   | 0 | 0            | 0 |
| 0 | 0            | 0 | -0.22665493  | 0 | 0.20437417   | 0 | 0            | 0 |
| 0 | -0.019875571 | 0 | -0.22631147  | 0 | 0.20444387   | 0 | 0            | 0 |
| 0 | 0            | 0 | -0.22593344  | 0 | 0.21176644   | 0 | -0.060776944 | 0 |
| 0 | -0.023166079 | 0 | 0            | 0 | 0            | 0 | -0.047677897 | 0 |
| 0 | 0            | 0 | 0            | 0 | 0            | 0 | -0.047692298 | 0 |
| 0 | 0            | 0 | 0            | 0 | -0.006095479 | 0 | -0.046947683 | 0 |
| 0 | -0.023798742 | 0 | 0            | 0 | -0.006128531 | 0 | -0.046898745 | 0 |
| 0 | 0.05753491   | 0 | 0            | 0 | 0            | 0 | 0            | 0 |
| 0 | 0            | 0 | 0            | 0 | 0            | 0 | 0            | 0 |
| 0 | -0.007653948 | 0 | 0            | 0 | 0            | 0 | -0.047075497 | 0 |
| 0 | 0.06375254   | 0 | 0.006623004  | 0 | 0            | 0 | 0            | 0 |
| 0 | 0            | 0 | -0.018121123 | 0 | 0            | 0 | -0.041208935 | 0 |
| 0 | 0            | 0 | 0.006691237  | 0 | 0            | 0 | 0            | 0 |
| 0 | 0            | 0 | 0            | 0 | -0.010200249 | 0 | -0.043281691 | 0 |
| 0 | 0.046870825  | 0 | 0            | 0 | 0            | 0 | 0            | 0 |
| 0 | 0            | 0 | -0.027022442 | 0 | 0            | 0 | -0.047104926 | 0 |
| 0 | -0.028819218 | 0 | -0.027039802 | 0 | 0            | 0 | -0.047073825 | 0 |

|   |              |   |              |   |              |              |              |
|---|--------------|---|--------------|---|--------------|--------------|--------------|
| 0 | -0.013274347 | 0 | -0.027202659 | 0 | 0            | -0.046986559 | 0            |
| 0 | 0            | 0 | -0.21181051  | 0 | 0.21665843   | 0            | 0            |
| 0 | 0.077216189  | 0 | 0            | 0 | 0.018993287  | 0            | 0            |
| 0 | 0            | 0 | 0            | 0 | 0.019011921  | 0            | 0            |
| 0 | 0            | 0 | -0.015041892 | 0 | 0            | -0.057119792 | 0            |
| 0 | 0            | 0 | 0            | 0 | -0.003440192 | 0            | -0.041970154 |
| 0 | -0.028370277 | 0 | -0.014998075 | 0 | 0            | -0.057115877 | 0            |
| 0 | 0.065832141  | 0 | 0            | 0 | 0.019547485  | 0            | 0            |
| 0 | 0            | 0 | 0            | 0 | -0.000858987 | 0            | -0.056627655 |
| 0 | 0.009443343  | 0 | 0            | 0 | 0            | -0.056586917 | 0            |
| 0 | -0.026629696 | 0 | 0            | 0 | -0.000819124 | 0            | -0.056625716 |
| 0 | 0.069804287  | 0 | 0.002887969  | 0 | 0            | 0            | 0            |
| 0 | 0.058186987  | 0 | 0            | 0 | 0            | 0            | 0            |
| 0 | 0            | 0 | 0.002896075  | 0 | 0            | 0            | 0            |
| 0 | 0.0652971    | 0 | 0.00342917   | 0 | 0            | 0            | 0            |
| 0 | 0            | 0 | 0            | 0 | -0.013368734 | 0            | -0.047442655 |
| 0 | -0.027951172 | 0 | 0            | 0 | -0.013385647 | 0            | -0.047410352 |
| 0 | -0.008741377 | 0 | -0.006725558 | 0 | 0            | 0            | -0.067222734 |
| 0 | -0.008161889 | 0 | 0            | 0 | -0.013811671 | 0            | -0.04712754  |
| 0 | -0.005144565 | 0 | 0            | 0 | 0.00522234   | 0            | -0.06422445  |
| 0 | -0.012106891 | 0 | 0            | 0 | 0            | 0            | -0.048001986 |
| 0 | 0            | 0 | -0.21228223  | 0 | 0.20700775   | 0            | -0.087757584 |
| 0 | 0            | 0 | 0            | 0 | 0.014741688  | 0            | 0            |
| 0 | -0.04340952  | 0 | -0.21229777  | 0 | 0.2069755    | 0            | -0.087686103 |
| 0 | 0.003036213  | 0 | -0.21103597  | 0 | 0.20864478   | 0            | -0.094404478 |
| 0 | 0            | 0 | -0.000498464 | 0 | 0            | 0            | 0            |
| 0 | -0.012656119 | 0 | -0.027295287 | 0 | 0            | 0            | 0            |
| 0 | 0            | 0 | -0.02728402  | 0 | 0            | 0            | 0            |
| 0 | -0.022721272 | 0 | -0.026674623 | 0 | 0            | 0            | 0            |
| 0 | 0            | 0 | -0.21182072  | 0 | 0.20598118   | 0            | 0            |
| 0 | -0.008038732 | 0 | -0.21180507  | 0 | 0.20599777   | 0            | 0            |
| 0 | 0            | 0 | -0.022870428 | 0 | 0            | 0            | -0.065800815 |
| 0 | -0.03731768  | 0 | -0.022856841 | 0 | 0            | 0            | -0.065744254 |
| 0 | 0.034655901  | 0 | -0.023804262 | 0 | 0            | 0            | -0.062615962 |
| 0 | -0.009627297 | 0 | -0.021498192 | 0 | 0            | 0            | 0            |
| 0 | -0.022347567 | 0 | -0.021298117 | 0 | 0            | 0            | 0            |
| 0 | 0            | 0 | -0.021484733 | 0 | 0            | 0            | 0            |
| 0 | -0.011665028 | 0 | 0            | 0 | -0.013610704 | 0            | 0            |
| 0 | 0            | 0 | 0            | 0 | -0.013600623 | 0            | 0            |
| 0 | -0.017959667 | 0 | 0            | 0 | -0.013256713 | 0            | 0            |
| 0 | 0            | 0 | 0            | 0 | -0.009355479 | 0            | -0.065934436 |
| 0 | -0.036320506 | 0 | 0            | 0 | -0.009344085 | 0            | -0.065876063 |
| 0 | 0.044158311  | 0 | 0            | 0 | 0            | 0            | -0.066133903 |
| 0 | -0.012102075 | 0 | 0            | 0 | 0            | 0            | 0            |
| 0 | -0.008084371 | 0 | 0            | 0 | -0.007095271 | 0            | 0            |
| 0 | -0.017891316 | 0 | 0            | 0 | -0.007246263 | 0            | 0            |
| 0 | 0            | 0 | 0            | 0 | -0.007083614 | 0            | 0            |

|   |              |   |              |   |              |   |              |   |
|---|--------------|---|--------------|---|--------------|---|--------------|---|
| 0 | 0.03513656   | 0 | 0            | 0 | -0.01046166  | 0 | -0.062497921 | 0 |
| 0 | -0.018672371 | 0 | 0            | 0 | 0            | 0 | 0            | 0 |
| 0 | -0.016187666 | 0 | -0.028557632 | 0 | 0            | 0 | 0            | 0 |
| 0 | 0            | 0 | -0.18154323  | 0 | 0.22777557   | 0 | 0            | 0 |
| 0 | 0.055413807  | 0 | -0.18147177  | 0 | 0.22755105   | 0 | 0            | 0 |
| 0 | 0            | 0 | 0            | 0 | 0.010936624  | 0 | 0            | 0 |
| 0 | -0.00397692  | 0 | 0            | 0 | 0.010978655  | 0 | 0            | 0 |
| 0 | -0.014231959 | 0 | 0            | 0 | -0.015244381 | 0 | 0            | 0 |
| 0 | 0            | 0 | -0.004036821 | 0 | 0            | 0 | 0            | 0 |
| 0 | 0.046297286  | 0 | 0            | 0 | 0            | 0 | 0            | 0 |
| 0 | -0.005991913 | 0 | -0.003993821 | 0 | 0            | 0 | 0            | 0 |
| 0 | -0.000377531 | 0 | -0.01213913  | 0 | 0            | 0 | -0.084750439 | 0 |
| 0 | 0            | 0 | -0.18256345  | 0 | 0.21353928   | 0 | 0            | 0 |
| 0 | 0.003608606  | 0 | 0            | 0 | 0.000121422  | 0 | -0.083706802 | 0 |
| 0 | 0.071691652  | 0 | -0.21466651  | 0 | 0.19700879   | 0 | 0            | 0 |
| 0 | 0            | 0 | -0.21444644  | 0 | 0.19643419   | 0 | 0            | 0 |
| 0 | -0.016109411 | 0 | -0.21442955  | 0 | 0.19644558   | 0 | 0            | 0 |
| 0 | 0.035475146  | 0 | -0.012818618 | 0 | 0            | 0 | 0            | 0 |
| 0 | 0.033898194  | 0 | 0            | 0 | 0.00073843   | 0 | 0            | 0 |
| 0 | 0            | 0 | 0            | 0 | 0.045449987  | 0 | 0            | 0 |
| 0 | 0.05946784   | 0 | 0            | 0 | 0.045339542  | 0 | 0            | 0 |
| 0 | -0.016073318 | 0 | 0            | 0 | 0.049345136  | 0 | 0            | 0 |
| 0 | 0            | 0 | -0.18374426  | 0 | 0.21754448   | 0 | 0            | 0 |
| 0 | 0.076654265  | 0 | -0.18360867  | 0 | 0.21726778   | 0 | 0            | 0 |
| 0 | -0.001664627 | 0 | -0.18088178  | 0 | 0.20772517   | 0 | 0            | 0 |
| 0 | 0            | 0 | -0.18087986  | 0 | 0.20773675   | 0 | 0            | 0 |
| 0 | -0.015642767 | 0 | -0.1822162   | 0 | 0.20600036   | 0 | 0            | 0 |
| 0 | 0            | 0 | 0.030910773  | 0 | 0            | 0 | 0            | 0 |
| 0 | 0.052802571  | 0 | 0.030811628  | 0 | 0            | 0 | 0            | 0 |
| 0 | -0.01934772  | 0 | 0.035992313  | 0 | 0            | 0 | 0            | 0 |
| 0 | 0.065148699  | 0 | -0.024208184 | 0 | 0            | 0 | 0            | 0 |
| 0 | -0.026624178 | 0 | 0            | 0 | 0            | 0 | 0            | 0 |
| 0 | 0.06615577   | 0 | 0            | 0 | -0.011499963 | 0 | 0            | 0 |
| 0 | -0.011390814 | 0 | 0            | 0 | 0.037760435  | 0 | 0            | 0 |
| 0 | -0.013675387 | 0 | 0            | 0 | 0.030938921  | 0 | 0            | 0 |
| 0 | -0.014766289 | 0 | 0.023952829  | 0 | 0            | 0 | 0            | 0 |
| 0 | -0.016944675 | 0 | 0.018285013  | 0 | 0            | 0 | 0            | 0 |
| 0 | 0            | 0 | -0.2379126   | 0 | 0.27470103   | 0 | -0.055497022 | 0 |
| 0 | 0            | 0 | -0.24330544  | 0 | 0.26746474   | 0 | -0.045083332 | 0 |
| 0 | -0.006708361 | 0 | -0.17640657  | 0 | 0.17944299   | 0 | 0            | 0 |
| 0 | -0.029814881 | 0 | -0.23665821  | 0 | 0.26516856   | 0 | -0.047702648 | 0 |
| 0 | 0            | 0 | -0.23663251  | 0 | 0.26517666   | 0 | -0.047740553 | 0 |
| 0 | 0            | 0 | -0.22932416  | 0 | 0.26556955   | 0 | -0.054525434 | 0 |
| 0 | 0            | 0 | -0.23013244  | 0 | 0.27045144   | 0 | -0.047589581 | 0 |
| 0 | 0            | 0 | -0.23130649  | 0 | 0.26924472   | 0 | -0.045972741 | 0 |
| 0 | 0            | 0 | -0.2367107   | 0 | 0.26463399   | 0 | -0.046065805 | 0 |
| 0 | 0.037060959  | 0 | -0.23667651  | 0 | 0.26447307   | 0 | -0.046063132 | 0 |

|   |              |   |             |   |             |   |              |   |
|---|--------------|---|-------------|---|-------------|---|--------------|---|
| 0 | 0            | 0 | -0.23616121 | 0 | 0.26641551  | 0 | -0.040200266 | 0 |
| 0 | 0            | 0 | -0.23175206 | 0 | 0.26176692  | 0 | -0.051101639 | 0 |
| 0 | 0            | 0 | -0.22720307 | 0 | 0.26877635  | 0 | -0.043502507 | 0 |
| 0 | 0            | 0 | -0.2299058  | 0 | 0.26932837  | 0 | 0            | 0 |
| 0 | 0.026674811  | 0 | -0.22989182 | 0 | 0.26919342  | 0 | 0            | 0 |
| 0 | 0            | 0 | -0.22853764 | 0 | 0.26762893  | 0 | 0            | 0 |
| 0 | 0            | 0 | -0.22720908 | 0 | 0.26680903  | 0 | 0            | 0 |
| 0 | 0            | 0 | -0.22886997 | 0 | 0.26511254  | 0 | 0            | 0 |
| 0 | 0            | 0 | 0           | 0 | 0.050135929 | 0 | -0.053195039 | 0 |
| 0 | 0            | 0 | -0.22341338 | 0 | 0.25879781  | 0 | -0.052209001 | 0 |
| 0 | -0.033420045 | 0 | -0.22345386 | 0 | 0.25877878  | 0 | -0.05213755  | 0 |
| 0 | 0            | 0 | -0.23123851 | 0 | 0.25969614  | 0 | -0.035184718 | 0 |
| 0 | 0            | 0 | 0           | 0 | 0.039544921 | 0 | -0.048987361 | 0 |
| 0 | 0            | 0 | -0.24054165 | 0 | 0.25018449  | 0 | -0.031330109 | 0 |
| 0 | -0.03318184  | 0 | -0.24056653 | 0 | 0.25017696  | 0 | -0.031287873 | 0 |
| 0 | 0            | 0 | -0.22255054 | 0 | 0.26912682  | 0 | 0            | 0 |
| 0 | 0.019602988  | 0 | -0.22253372 | 0 | 0.2690235   | 0 | 0            | 0 |
| 0 | 0            | 0 | -0.22726344 | 0 | 0.26414556  | 0 | 0            | 0 |
| 0 | 0            | 0 | 0           | 0 | 0.047369129 | 0 | -0.055037301 | 0 |
| 0 | 0            | 0 | 0           | 0 | 0.047816063 | 0 | -0.055252726 | 0 |
| 0 | 0            | 0 | 0           | 0 | 0.044955265 | 0 | -0.051685705 | 0 |
| 0 | 0.018349271  | 0 | 0           | 0 | 0.044896173 | 0 | -0.051705406 | 0 |
| 0 | 0            | 0 | -0.22440235 | 0 | 0.26532348  | 0 | 0            | 0 |
| 0 | 0            | 0 | 0           | 0 | 0.040989552 | 0 | -0.048211214 | 0 |
| 0 | -0.020728984 | 0 | -0.2275858  | 0 | 0.26069763  | 0 | 0            | 0 |
| 0 | 0            | 0 | -0.22756136 | 0 | 0.26070516  | 0 | 0            | 0 |
| 0 | 0            | 0 | 0           | 0 | 0.035877085 | 0 | -0.042126935 | 0 |
| 0 | 0.030554502  | 0 | 0           | 0 | 0.035775942 | 0 | -0.042131582 | 0 |
| 0 | -0.026243042 | 0 | -0.22235029 | 0 | 0.26125485  | 0 | 0            | 0 |
| 0 | 0            | 0 | -0.22231563 | 0 | 0.26126891  | 0 | 0            | 0 |
| 0 | 0            | 0 | -0.22216516 | 0 | 0.25989478  | 0 | -0.04512249  | 0 |
| 0 | 0            | 0 | -0.22435947 | 0 | 0.26374097  | 0 | 0            | 0 |
| 0 | 0            | 0 | -0.22537466 | 0 | 0.26288759  | 0 | 0            | 0 |
| 0 | -0.027831011 | 0 | -0.22753146 | 0 | 0.25079794  | 0 | -0.042700054 | 0 |
| 0 | 0            | 0 | -0.22753685 | 0 | 0.25077173  | 0 | -0.042621679 | 0 |
| 0 | 0            | 0 | 0           | 0 | 0.048934254 | 0 | -0.052544892 | 0 |
| 0 | -0.044229177 | 0 | 0           | 0 | 0.048850061 | 0 | -0.052428596 | 0 |
| 0 | -0.024161833 | 0 | -0.22610637 | 0 | 0.25593106  | 0 | 0            | 0 |
| 0 | -0.015154279 | 0 | -0.22386979 | 0 | 0.26063448  | 0 | 0            | 0 |
| 0 | -0.01525134  | 0 | -0.22306501 | 0 | 0.26102056  | 0 | 0            | 0 |
| 0 | -0.022997684 | 0 | -0.22331862 | 0 | 0.2609098   | 0 | 0            | 0 |
| 0 | 0            | 0 | -0.22384977 | 0 | 0.26064361  | 0 | 0            | 0 |
| 0 | 0            | 0 | -0.22307674 | 0 | 0.26101596  | 0 | 0            | 0 |
| 0 | 0            | 0 | -0.22612016 | 0 | 0.25590697  | 0 | 0            | 0 |
| 0 | 0            | 0 | 0.022804011 | 0 | 0           | 0 | -0.050018591 | 0 |
| 0 | 0            | 0 | 0.028982309 | 0 | 0           | 0 | -0.051984934 | 0 |
| 0 | 0            | 0 | -0.22214697 | 0 | 0.2617136   | 0 | 0            | 0 |



|   |              |   |             |   |             |   |              |   |
|---|--------------|---|-------------|---|-------------|---|--------------|---|
| 0 | 0            | 0 | -0.22389924 | 0 | 0.26163908  | 0 | 0            | 0 |
| 0 | 0            | 0 | 0           | 0 | 0.046977921 | 0 | -0.053951466 | 0 |
| 0 | -0.033441764 | 0 | 0           | 0 | 0.046920517 | 0 | -0.053877191 | 0 |
| 0 | -0.020315663 | 0 | -0.23144068 | 0 | 0.25136371  | 0 | 0            | 0 |
| 0 | 0            | 0 | -0.22540456 | 0 | 0.25984961  | 0 | 0            | 0 |
| 0 | 0            | 0 | 0.022598837 | 0 | 0           | 0 | -0.048500304 | 0 |
| 0 | -0.024586533 | 0 | -0.22378787 | 0 | 0.26041471  | 0 | 0            | 0 |
| 0 | 0            | 0 | -0.22369878 | 0 | 0.26044357  | 0 | 0            | 0 |
| 0 | 0.037403776  | 0 | -0.22523619 | 0 | 0.25971548  | 0 | 0            | 0 |
| 0 | 0.034022553  | 0 | -0.22369252 | 0 | 0.26026406  | 0 | 0            | 0 |
| 0 | -0.03066866  | 0 | 0           | 0 | 0.042380808 | 0 | -0.050091582 | 0 |
| 0 | 0            | 0 | 0           | 0 | 0.042345458 | 0 | -0.050043135 | 0 |
| 0 | 0            | 0 | 0.028133098 | 0 | 0           | 0 | -0.05468377  | 0 |
| 0 | 0            | 0 | 0.027094403 | 0 | 0           | 0 | -0.053004376 | 0 |
| 0 | 0            | 0 | 0.019133303 | 0 | 0           | 0 | -0.044436379 | 0 |
| 0 | 0.010413367  | 0 | 0.027035726 | 0 | 0           | 0 | -0.053015529 | 0 |
| 0 | 0.021055105  | 0 | 0.019041939 | 0 | 0           | 0 | -0.044436934 | 0 |
| 0 | 0            | 0 | 0.026868855 | 0 | 0           | 0 | -0.053968645 | 0 |
| 0 | 0            | 0 | 0           | 0 | 0           | 0 | -0.05206648  | 0 |
| 0 | 0.00206314   | 0 | 0           | 0 | 0           | 0 | -0.052063723 | 0 |
| 0 | 0            | 0 | 0           | 0 | 0           | 0 | -0.052231229 | 0 |
| 0 | 0            | 0 | 0           | 0 | 0           | 0 | -0.052035493 | 0 |
| 0 | 0            | 0 | 0           | 0 | 0.032009566 | 0 | -0.042226771 | 0 |
| 0 | -0.030728114 | 0 | 0           | 0 | 0.031981951 | 0 | -0.042186538 | 0 |
| 0 | 0            | 0 | -0.24177126 | 0 | 0.25371696  | 0 | -0.051351303 | 0 |
| 0 | 0            | 0 | 0           | 0 | 0           | 0 | -0.050810225 | 0 |
| 0 | 0            | 0 | 0           | 0 | 0           | 0 | -0.051080729 | 0 |
| 0 | 0.001655271  | 0 | 0           | 0 | 0           | 0 | -0.050856968 | 0 |
| 0 | 0            | 0 | 0           | 0 | 0.049216521 | 0 | -0.044532052 | 0 |
| 0 | 0            | 0 | -0.22147383 | 0 | 0.25524924  | 0 | 0            | 0 |
| 0 | 0            | 0 | 0           | 0 | 0           | 0 | -0.049171504 | 0 |
| 0 | 0.007189216  | 0 | 0           | 0 | 0           | 0 | -0.04917492  | 0 |
| 0 | 0.072171658  | 0 | -0.24161573 | 0 | 0.25343842  | 0 | -0.051570682 | 0 |
| 0 | -0.022746554 | 0 | 0           | 0 | 0           | 0 | -0.047531113 | 0 |
| 0 | -0.012506896 | 0 | 0           | 0 | 0.033704342 | 0 | -0.044199358 | 0 |
| 0 | -0.01775767  | 0 | -0.23490605 | 0 | 0.24246641  | 0 | -0.03205917  | 0 |
| 0 | 0            | 0 | 0           | 0 | 0.045531359 | 0 | -0.053596461 | 0 |
| 0 | 0            | 0 | 0           | 0 | 0.044235371 | 0 | -0.051027282 | 0 |
| 0 | 0.016816004  | 0 | 0           | 0 | 0.044251009 | 0 | -0.051095241 | 0 |
| 0 | 0            | 0 | 0           | 0 | 0.049317667 | 0 | -0.046889796 | 0 |
| 0 | 0            | 0 | 0           | 0 | 0.040849261 | 0 | -0.047887361 | 0 |
| 0 | 0            | 0 | 0           | 0 | 0.043819834 | 0 | -0.041956957 | 0 |
| 0 | 0.028442455  | 0 | 0           | 0 | 0.040666168 | 0 | -0.047881003 | 0 |
| 0 | 0            | 0 | 0           | 0 | 0           | 0 | -0.052079089 | 0 |
| 0 | 0.009073619  | 0 | 0           | 0 | 0           | 0 | -0.052150984 | 0 |
| 0 | 0            | 0 | 0           | 0 | 0           | 0 | -0.053195311 | 0 |
| 0 | 0            | 0 | 0.028356229 | 0 | 0           | 0 | -0.051497049 | 0 |

|   |              |   |             |   |             |   |              |   |
|---|--------------|---|-------------|---|-------------|---|--------------|---|
| 0 | -0.044179552 | 0 | 0.028272517 | 0 | 0           | 0 | -0.051391908 | 0 |
| 0 | 0            | 0 | 0           | 0 | 0           | 0 | -0.054886668 | 0 |
| 0 | 0.00085179   | 0 | 0           | 0 | 0           | 0 | -0.054900859 | 0 |
| 0 | -0.025081185 | 0 | 0           | 0 | 0           | 0 | -0.055876192 | 0 |
| 0 | 0            | 0 | 0           | 0 | 0.050317944 | 0 | -0.042942861 | 0 |
| 0 | 0            | 0 | -0.24455971 | 0 | 0.24522431  | 0 | -0.062082957 | 0 |
| 0 | -0.016001778 | 0 | 0           | 0 | 0.033060317 | 0 | -0.042524748 | 0 |
| 0 | 0            | 0 | 0.026469166 | 0 | 0           | 0 | -0.052870989 | 0 |
| 0 | -0.033942737 | 0 | 0.026410082 | 0 | 0           | 0 | -0.052804706 | 0 |
| 0 | -0.03593689  | 0 | 0           | 0 | 0.032728274 | 0 | -0.040129513 | 0 |
| 0 | 0            | 0 | 0           | 0 | 0.032676712 | 0 | -0.040051388 | 0 |
| 0 | -0.032132253 | 0 | 0.023562488 | 0 | 0           | 0 | -0.050413753 | 0 |
| 0 | 0            | 0 | 0.023523056 | 0 | 0           | 0 | -0.050373758 | 0 |
| 0 | -0.03328551  | 0 | 0.015534664 | 0 | 0           | 0 | -0.044015168 | 0 |
| 0 | 0            | 0 | 0.015567007 | 0 | 0           | 0 | -0.044055138 | 0 |
| 0 | 0            | 0 | 0           | 0 | 0           | 0 | -0.051644189 | 0 |
| 0 | -0.041090132 | 0 | 0           | 0 | 0           | 0 | -0.051580864 | 0 |
| 0 | 0            | 0 | 0           | 0 | 0.047641631 | 0 | 0            | 0 |
| 0 | 0.022482798  | 0 | 0           | 0 | 0.047565098 | 0 | 0            | 0 |
| 0 | -0.03758385  | 0 | 0           | 0 | 0           | 0 | -0.048875112 | 0 |
| 0 | 0            | 0 | 0           | 0 | 0           | 0 | -0.04884224  | 0 |
| 0 | 0            | 0 | 0           | 0 | 0.047409864 | 0 | 0            | 0 |
| 0 | 0.021244864  | 0 | 0           | 0 | 0.047431888 | 0 | 0            | 0 |
| 0 | -0.0176638   | 0 | 0.017676523 | 0 | 0           | 0 | -0.04647992  | 0 |
| 0 | 0            | 0 | 0           | 0 | 0.04606034  | 0 | 0            | 0 |
| 0 | 0.025124601  | 0 | 0           | 0 | 0.045918981 | 0 | 0            | 0 |
| 0 | 0            | 0 | 0           | 0 | 0.047033289 | 0 | 0            | 0 |
| 0 | -0.019512265 | 0 | 0           | 0 | 0.043642617 | 0 | 0            | 0 |
| 0 | 0            | 0 | 0           | 0 | 0.045778067 | 0 | 0            | 0 |
| 0 | -0.015878226 | 0 | -0.21748492 | 0 | 0.25115076  | 0 | 0            | 0 |
| 0 | 0            | 0 | -0.21747951 | 0 | 0.25115529  | 0 | 0            | 0 |
| 0 | -0.021033833 | 0 | -0.21788845 | 0 | 0.25096329  | 0 | 0            | 0 |
| 0 | -0.021303774 | 0 | 0           | 0 | 0           | 0 | -0.046082406 | 0 |
| 0 | -0.018782855 | 0 | 0           | 0 | 0           | 0 | -0.050590399 | 0 |
| 0 | 0            | 0 | 0           | 0 | 0           | 0 | -0.050713831 | 0 |
| 0 | -0.044247673 | 0 | 0           | 0 | 0           | 0 | -0.050662381 | 0 |
| 0 | 0            | 0 | 0           | 0 | 0.047246637 | 0 | 0            | 0 |
| 0 | -0.039645369 | 0 | -0.22045987 | 0 | 0.24771684  | 0 | 0            | 0 |
| 0 | -0.034596624 | 0 | 0           | 0 | 0           | 0 | -0.05222305  | 0 |
| 0 | 0            | 0 | 0           | 0 | 0           | 0 | -0.052243614 | 0 |
| 0 | -0.022344782 | 0 | 0           | 0 | 0           | 0 | -0.051986376 | 0 |
| 0 | -0.029191036 | 0 | 0           | 0 | 0           | 0 | -0.051322275 | 0 |
| 0 | 0            | 0 | 0.023950167 | 0 | 0           | 0 | -0.050102047 | 0 |
| 0 | 0.014806224  | 0 | 0.023966915 | 0 | 0           | 0 | -0.050172508 | 0 |
| 0 | -0.033201907 | 0 | 0           | 0 | 0.044535325 | 0 | -0.051720326 | 0 |
| 0 | 0            | 0 | 0           | 0 | 0.044551542 | 0 | -0.051742546 | 0 |
| 0 | 0            | 0 | 0.024929418 | 0 | 0           | 0 | -0.052208901 | 0 |

|   |              |   |             |   |             |   |              |   |
|---|--------------|---|-------------|---|-------------|---|--------------|---|
| 0 | 0            | 0 | 0.022086448 | 0 | 0           | 0 | -0.048325226 | 0 |
| 0 | 0            | 0 | 0.028496138 | 0 | 0           | 0 | -0.043448751 | 0 |
| 0 | 0.021942773  | 0 | 0.021941857 | 0 | 0           | 0 | -0.048323571 | 0 |
| 0 | -0.008833865 | 0 | 0           | 0 | 0.042727014 | 0 | -0.050700527 | 0 |
| 0 | 0            | 0 | 0.024990405 | 0 | 0           | 0 | -0.041791396 | 0 |
| 0 | -0.019760953 | 0 | 0.016850733 | 0 | 0           | 0 | -0.044777982 | 0 |
| 0 | -0.037394918 | 0 | 0.015110892 | 0 | 0           | 0 | -0.041247554 | 0 |
| 0 | 0            | 0 | 0.015056004 | 0 | 0           | 0 | -0.04117684  | 0 |
| 0 | -0.001800613 | 0 | -0.13708218 | 0 | 0.2078202   | 0 | 0            | 0 |
| 0 | 0            | 0 | 0.028340492 | 0 | 0           | 0 | -0.045396629 | 0 |
| 0 | 0            | 0 | 0           | 0 | 0.04516508  | 0 | 0            | 0 |
| 0 | 0.029781465  | 0 | 0           | 0 | 0.045188122 | 0 | 0            | 0 |
| 0 | 0            | 0 | 0           | 0 | 0.049648498 | 0 | 0            | 0 |
| 0 | 0            | 0 | -0.24092702 | 0 | 0.25259736  | 0 | 0            | 0 |
| 0 | 0.021421573  | 0 | 0           | 0 | 0.049555726 | 0 | 0            | 0 |
| 0 | -0.021386271 | 0 | 0           | 0 | 0.050918786 | 0 | 0            | 0 |
| 0 | -0.04410422  | 0 | 0           | 0 | 0           | 0 | -0.042407041 | 0 |
| 0 | 0.087523096  | 0 | -0.24070134 | 0 | 0.25219473  | 0 | 0            | 0 |
| 0 | -0.030594796 | 0 | 0           | 0 | 0           | 0 | -0.049328892 | 0 |
| 0 | 0            | 0 | 0           | 0 | 0           | 0 | -0.049780365 | 0 |
| 0 | 0.013334399  | 0 | 0           | 0 | 0           | 0 | -0.049842732 | 0 |
| 0 | -0.023737053 | 0 | 0           | 0 | 0           | 0 | -0.049401937 | 0 |
| 0 | 0            | 0 | 0           | 0 | 0.044778962 | 0 | 0            | 0 |
| 0 | 0            | 0 | 0.029388246 | 0 | 0           | 0 | -0.041641863 | 0 |
| 0 | -0.02335273  | 0 | 0           | 0 | 0.046293378 | 0 | 0            | 0 |
| 0 | 0            | 0 | 0           | 0 | 0.046335534 | 0 | 0            | 0 |
| 0 | 0            | 0 | 0           | 0 | 0           | 0 | -0.04274959  | 0 |
| 0 | -0.020772744 | 0 | 0           | 0 | 0.042341501 | 0 | 0            | 0 |
| 0 | 0            | 0 | 0           | 0 | 0.042317454 | 0 | 0            | 0 |
| 0 | -0.013131435 | 0 | 0           | 0 | 0.014938852 | 0 | -0.027905135 | 0 |
| 0 | -0.02612449  | 0 | 0           | 0 | 0.046538875 | 0 | 0            | 0 |
| 0 | 0            | 0 | 0           | 0 | 0.046545806 | 0 | 0            | 0 |
| 0 | -0.014854902 | 0 | 0           | 0 | 0.046145668 | 0 | 0            | 0 |
| 0 | 0            | 0 | -0.23829313 | 0 | 0.23752178  | 0 | -0.059733239 | 0 |
| 0 | 0            | 0 | -0.23827147 | 0 | 0.2374463   | 0 | -0.059294999 | 0 |
| 0 | 0            | 0 | -0.23514126 | 0 | 0.25049726  | 0 | -0.069393848 | 0 |
| 0 | 0.061960038  | 0 | -0.23515463 | 0 | 0.25042546  | 0 | -0.069268379 | 0 |
| 0 | 0            | 0 | 0.03020137  | 0 | 0           | 0 | 0            | 0 |
| 0 | 0.014901997  | 0 | 0.030128113 | 0 | 0           | 0 | 0            | 0 |
| 0 | -0.018579223 | 0 | 0           | 0 | 0.037987972 | 0 | 0            | 0 |
| 0 | -0.02355432  | 0 | 0.027718755 | 0 | 0           | 0 | 0            | 0 |
| 0 | 0            | 0 | 0.026863108 | 0 | 0           | 0 | 0            | 0 |
| 0 | 0            | 0 | 0.027207575 | 0 | 0           | 0 | 0            | 0 |
| 0 | 0.019496916  | 0 | 0.026888313 | 0 | 0           | 0 | 0            | 0 |
| 0 | 0.018823262  | 0 | 0.027101482 | 0 | 0           | 0 | 0            | 0 |
| 0 | 0            | 0 | 0.026605645 | 0 | 0           | 0 | 0            | 0 |
| 0 | 0            | 0 | 0.027061407 | 0 | 0           | 0 | 0            | 0 |

|   |              |   |             |   |             |   |              |   |
|---|--------------|---|-------------|---|-------------|---|--------------|---|
| 0 | 0            | 0 | 0           | 0 | 0.047213943 | 0 | 0            | 0 |
| 0 | 0            | 0 | 0.026483778 | 0 | 0           | 0 | 0            | 0 |
| 0 | -0.017233177 | 0 | 0.001285696 | 0 | 0           | 0 | -0.03175692  | 0 |
| 0 | -0.033703907 | 0 | 0.024428728 | 0 | 0           | 0 | -0.050548403 | 0 |
| 0 | 0            | 0 | 0.024442091 | 0 | 0           | 0 | -0.050569769 | 0 |
| 0 | -0.013812094 | 0 | 0.023090572 | 0 | 0           | 0 | -0.049808698 | 0 |
| 0 | -0.053588663 | 0 | 0           | 0 | 0.030117153 | 0 | -0.040578294 | 0 |
| 0 | -0.015375821 | 0 | 0           | 0 | 0.044638233 | 0 | 0            | 0 |
| 0 | -0.025879313 | 0 | 0           | 0 | 0.044244681 | 0 | 0            | 0 |
| 0 | 0            | 0 | 0           | 0 | 0.044647529 | 0 | 0            | 0 |
| 0 | -0.01962483  | 0 | 0           | 0 | 0.044010504 | 0 | 0            | 0 |
| 0 | 0            | 0 | 0           | 0 | 0.020309499 | 0 | -0.052142236 | 0 |
| 0 | -0.04067184  | 0 | 0           | 0 | 0.036310503 | 0 | 0            | 0 |
| 0 | 0.069769043  | 0 | 0           | 0 | 0.020190957 | 0 | -0.05235185  | 0 |
| 0 | 0            | 0 | 0           | 0 | 0           | 0 | 0            | 0 |
| 0 | 0.019674409  | 0 | 0           | 0 | 0           | 0 | 0            | 0 |
| 0 | 0            | 0 | 0.024789426 | 0 | 0           | 0 | 0            | 0 |
| 0 | 0.02761421   | 0 | 0.024816667 | 0 | 0           | 0 | 0            | 0 |
| 0 | 0            | 0 | 0           | 0 | 0           | 0 | -0.051756507 | 0 |
| 0 | 0.052987806  | 0 | 0           | 0 | 0           | 0 | -0.051952389 | 0 |
| 0 | 0            | 0 | 0           | 0 | 0           | 0 | 0            | 0 |
| 0 | 0            | 0 | 0           | 0 | 0           | 0 | 0            | 0 |
| 0 | 0.018383105  | 0 | 0           | 0 | 0           | 0 | 0            | 0 |
| 0 | -0.030736415 | 0 | 0           | 0 | 0           | 0 | 0            | 0 |
| 0 | 0            | 0 | -0.23690863 | 0 | 0.24640723  | 0 | 0            | 0 |
| 0 | -0.028038054 | 0 | -0.23605094 | 0 | 0.24622261  | 0 | 0            | 0 |
| 0 | 0            | 0 | -0.23606407 | 0 | 0.24621095  | 0 | 0            | 0 |
| 0 | 0            | 0 | 0           | 0 | 0           | 0 | 0            | 0 |
| 0 | 0.009144513  | 0 | 0           | 0 | 0           | 0 | 0            | 0 |
| 0 | -0.016785154 | 0 | 0           | 0 | 0           | 0 | 0            | 0 |
| 0 | 0.088848466  | 0 | -0.23665377 | 0 | 0.24600676  | 0 | 0            | 0 |
| 0 | 0.087394859  | 0 | -0.23592763 | 0 | 0.24579514  | 0 | 0            | 0 |
| 0 | -0.026117741 | 0 | 0           | 0 | 0           | 0 | -0.049554451 | 0 |
| 0 | -0.027042998 | 0 | 0           | 0 | 0.043007616 | 0 | 0            | 0 |
| 0 | 0            | 0 | 0           | 0 | 0.042595995 | 0 | 0            | 0 |
| 0 | 0            | 0 | 0.024284383 | 0 | 0           | 0 | 0            | 0 |
| 0 | 0.033044206  | 0 | 0           | 0 | 0.042570944 | 0 | 0            | 0 |
| 0 | -0.021314523 | 0 | 0           | 0 | 0.041778947 | 0 | 0            | 0 |
| 0 | 0            | 0 | 0.030422173 | 0 | 0           | 0 | 0            | 0 |
| 0 | 0.015949142  | 0 | 0.030352754 | 0 | 0           | 0 | 0            | 0 |
| 0 | 0            | 0 | 0.002783032 | 0 | 0           | 0 | -0.051480203 | 0 |
| 0 | 0            | 0 | 0           | 0 | 0           | 0 | -0.05161666  | 0 |
| 0 | -0.022436047 | 0 | 0           | 0 | 0           | 0 | -0.051383854 | 0 |
| 0 | -0.031167907 | 0 | 0           | 0 | 0           | 0 | 0            | 0 |
| 0 | 0.061950295  | 0 | 0.002673969 | 0 | 0           | 0 | -0.051679116 | 0 |
| 0 | 0.060763862  | 0 | 0           | 0 | 0           | 0 | -0.051780265 | 0 |
| 0 | -0.023737275 | 0 | 0.026224902 | 0 | 0           | 0 | 0            | 0 |

|   |              |   |              |   |             |   |              |
|---|--------------|---|--------------|---|-------------|---|--------------|
| 0 | 0            | 0 | 0.026268825  | 0 | 0           | 0 | 0            |
| 0 | -0.025277362 | 0 | 0.033860633  | 0 | 0           | 0 | 0            |
| 0 | 0            | 0 | -0.22217147  | 0 | 0.25028401  | 0 | -0.08216549  |
| 0 | -0.022411038 | 0 | 0.023887154  | 0 | 0           | 0 | 0            |
| 0 | 0            | 0 | 0.02386285   | 0 | 0           | 0 | 0            |
| 0 | 0.050336     | 0 | -0.22212426  | 0 | 0.25011273  | 0 | -0.082198818 |
| 0 | -0.022587801 | 0 | 0.022183521  | 0 | 0           | 0 | 0            |
| 0 | 0            | 0 | 0            | 0 | 0           | 0 | 0            |
| 0 | -0.033889974 | 0 | 0            | 0 | 0           | 0 | 0            |
| 0 | -0.048917993 | 0 | 0.013017306  | 0 | 0           | 0 | -0.041665638 |
| 0 | 0.026155726  | 0 | 0            | 0 | 0           | 0 | 0            |
| 0 | -0.02019531  | 0 | 0.026192907  | 0 | 0           | 0 | 0            |
| 0 | -0.026549983 | 0 | 0.026188745  | 0 | 0           | 0 | 0            |
| 0 | 0            | 0 | 0.026201833  | 0 | 0           | 0 | 0            |
| 0 | 0            | 0 | -0.23139545  | 0 | 0.23733434  | 0 | -0.070774436 |
| 0 | 0            | 0 | -0.23453143  | 0 | 0.23923072  | 0 | -0.077304806 |
| 0 | 0            | 0 | -0.22004324  | 0 | 0.24544154  | 0 | -0.08968065  |
| 0 | 0            | 0 | 0.026699823  | 0 | 0           | 0 | 0            |
| 0 | -0.035655198 | 0 | 0.019083475  | 0 | 0           | 0 | 0            |
| 0 | 0            | 0 | -0.23439489  | 0 | 0.23747823  | 0 | -0.049495614 |
| 0 | 0            | 0 | 0            | 0 | 0.015837313 | 0 | -0.05962077  |
| 0 | -0.024281775 | 0 | 0            | 0 | 0           | 0 | 0            |
| 0 | -0.022871392 | 0 | 0            | 0 | 0           | 0 | 0            |
| 0 | 0            | 0 | 0            | 0 | 0           | 0 | 0            |
| 0 | -0.028547611 | 0 | 0            | 0 | 0           | 0 | 0            |
| 0 | -0.016304335 | 0 | 0.024384759  | 0 | 0           | 0 | 0            |
| 0 | -0.024364287 | 0 | 0.02417966   | 0 | 0           | 0 | 0            |
| 0 | 0            | 0 | 0.024396045  | 0 | 0           | 0 | 0            |
| 0 | -0.022274643 | 0 | 0.025983121  | 0 | 0           | 0 | 0            |
| 0 | -0.022108122 | 0 | 0            | 0 | 0           | 0 | 0            |
| 0 | -0.010026068 | 0 | 0            | 0 | 0           | 0 | 0            |
| 0 | 0            | 0 | 0            | 0 | 0           | 0 | -0.058624414 |
| 0 | 0            | 0 | 0            | 0 | 0.019487759 | 0 | -0.050259858 |
| 0 | 0            | 0 | -0.000959404 | 0 | 0           | 0 | -0.058228647 |
| 0 | 0            | 0 | 0            | 0 | 0.018110356 | 0 | -0.049694692 |
| 0 | -0.015705314 | 0 | 0            | 0 | 0.018520842 | 0 | -0.049622746 |
| 0 | 0.07070669   | 0 | 0            | 0 | 0.019259973 | 0 | -0.050425223 |
| 0 | 0.07133972   | 0 | 0            | 0 | 0.018012609 | 0 | -0.049905872 |
| 0 | 0            | 0 | -0.23296666  | 0 | 0.23602734  | 0 | 0            |
| 0 | 0            | 0 | 0.022444872  | 0 | 0           | 0 | 0            |
| 0 | -0.026063391 | 0 | 0.022063059  | 0 | 0           | 0 | 0            |
| 0 | 0.030798656  | 0 | 0.022430648  | 0 | 0           | 0 | 0            |
| 0 | -0.023471669 | 0 | 0.024782621  | 0 | 0           | 0 | 0            |
| 0 | -0.027600507 | 0 | 0            | 0 | 0           | 0 | 0            |
| 0 | -0.024849356 | 0 | 0            | 0 | 0.041177766 | 0 | 0            |
| 0 | 0            | 0 | 0            | 0 | 0           | 0 | -0.049457191 |
| 0 | -0.02051836  | 0 | 0            | 0 | 0           | 0 | -0.049132267 |

|   |              |   |              |   |             |   |              |   |
|---|--------------|---|--------------|---|-------------|---|--------------|---|
| 0 | 0            | 0 | 0.000702055  | 0 | 0           | 0 | -0.049166146 | 0 |
| 0 | -0.026331563 | 0 | 0            | 0 | 0           | 0 | -0.049358525 | 0 |
| 0 | 0            | 0 | 0.002076273  | 0 | 0           | 0 | -0.049443063 | 0 |
| 0 | -0.020435621 | 0 | 0.001457241  | 0 | 0           | 0 | -0.049043475 | 0 |
| 0 | 0.063988986  | 0 | 0            | 0 | 0           | 0 | -0.049620409 | 0 |
| 0 | 0.064357565  | 0 | 0.00061385   | 0 | 0           | 0 | -0.049366703 | 0 |
| 0 | 0            | 0 | -0.22137587  | 0 | 0.24832046  | 0 | -0.091123328 | 0 |
| 0 | 0.062990617  | 0 | 0.001877597  | 0 | 0           | 0 | -0.04959876  | 0 |
| 0 | 0.05462293   | 0 | -0.22131367  | 0 | 0.24816206  | 0 | -0.091202421 | 0 |
| 0 | -0.030491594 | 0 | 0            | 0 | 0           | 0 | 0            | 0 |
| 0 | -0.003740889 | 0 | -0.21974114  | 0 | 0.25010475  | 0 | -0.099510572 | 0 |
| 0 | 0            | 0 | 0            | 0 | 0.008030388 | 0 | -0.060345757 | 0 |
| 0 | 0            | 0 | -0.00780875  | 0 | 0           | 0 | -0.058763003 | 0 |
| 0 | 0            | 0 | -0.23638745  | 0 | 0.23058254  | 0 | 0            | 0 |
| 0 | 0            | 0 | 0            | 0 | 0.022396001 | 0 | 0            | 0 |
| 0 | -0.025933525 | 0 | 0.021683049  | 0 | 0           | 0 | 0            | 0 |
| 0 | 0.078134152  | 0 | 0            | 0 | 0.022271184 | 0 | 0            | 0 |
| 0 | -0.025691212 | 0 | 0            | 0 | 0.018162209 | 0 | 0            | 0 |
| 0 | 0.039129202  | 0 | 0            | 0 | 0           | 0 | -0.068175044 | 0 |
| 0 | 0            | 0 | 0            | 0 | 0.018205053 | 0 | 0            | 0 |
| 0 | 0            | 0 | 0            | 0 | 0           | 0 | -0.068227543 | 0 |
| 0 | 0            | 0 | 0            | 0 | 0.023675867 | 0 | -0.064491469 | 0 |
| 0 | 0.058391025  | 0 | 0            | 0 | 0.023549874 | 0 | -0.064411791 | 0 |
| 0 | 0            | 0 | 0.004694601  | 0 | 0           | 0 | 0            | 0 |
| 0 | -0.032360575 | 0 | 0            | 0 | 0           | 0 | 0            | 0 |
| 0 | 0            | 0 | 0            | 0 | 0           | 0 | 0            | 0 |
| 0 | 0.085298356  | 0 | 0            | 0 | 0.017931889 | 0 | 0            | 0 |
| 0 | 0.07149273   | 0 | 0.004585756  | 0 | 0           | 0 | 0            | 0 |
| 0 | 0.069941687  | 0 | 0            | 0 | 0           | 0 | 0            | 0 |
| 0 | 0.059507425  | 0 | 0            | 0 | 0.022522405 | 0 | -0.069505363 | 0 |
| 0 | 0            | 0 | 0            | 0 | 0.02257182  | 0 | -0.069579301 | 0 |
| 0 | 0            | 0 | 0            | 0 | 0.021281212 | 0 | -0.073314044 | 0 |
| 0 | 0.02888789   | 0 | 0            | 0 | 0.021889116 | 0 | -0.06699913  | 0 |
| 0 | 0            | 0 | -0.008745555 | 0 | 0           | 0 | -0.056449595 | 0 |
| 0 | -0.027437319 | 0 | 0            | 0 | 0           | 0 | 0            | 0 |
| 0 | 0            | 0 | 0.000879416  | 0 | 0           | 0 | 0            | 0 |
| 0 | -0.030267866 | 0 | 0.001161509  | 0 | 0           | 0 | 0            | 0 |
| 0 | 0            | 0 | 0            | 0 | 0.007276093 | 0 | -0.057805827 | 0 |
| 0 | 0.077408916  | 0 | 0.000639832  | 0 | 0           | 0 | 0            | 0 |
| 0 | 0            | 0 | 0            | 0 | 0.03817392  | 0 | -0.083023308 | 0 |
| 0 | 0            | 0 | -0.23045883  | 0 | 0.22443227  | 0 | 0            | 0 |
| 0 | 0.042889571  | 0 | 0            | 0 | 0.038099943 | 0 | -0.083082852 | 0 |
| 0 | 0            | 0 | 0.006453073  | 0 | 0           | 0 | -0.064281274 | 0 |
| 0 | 0.050827353  | 0 | 0.006355403  | 0 | 0           | 0 | -0.06420997  | 0 |
| 0 | 0.018750602  | 0 | 0            | 0 | 0           | 0 | -0.064252559 | 0 |
| 0 | 0.051761072  | 0 | 0.005336201  | 0 | 0           | 0 | -0.068740062 | 0 |
| 0 | 0            | 0 | 0.004685936  | 0 | 0           | 0 | -0.07206832  | 0 |

|   |              |   |              |   |             |   |              |   |
|---|--------------|---|--------------|---|-------------|---|--------------|---|
| 0 | 0            | 0 | -0.22375355  | 0 | 0.23285864  | 0 | -0.064076923 | 0 |
| 0 | 0            | 0 | 0.005369327  | 0 | 0           | 0 | -0.068808386 | 0 |
| 0 | 0.033841785  | 0 | 0            | 0 | 0           | 0 | -0.068593349 | 0 |
| 0 | 0.028583837  | 0 | 0.004831661  | 0 | 0           | 0 | -0.066502061 | 0 |
| 0 | -0.007375932 | 0 | 0            | 0 | 0.032926619 | 0 | -0.077510319 | 0 |
| 0 | -0.00113075  | 0 | -0.22832723  | 0 | 0.22763301  | 0 | 0            | 0 |
| 0 | 0            | 0 | -0.22832759  | 0 | 0.2276545   | 0 | 0            | 0 |
| 0 | 0            | 0 | -0.22836595  | 0 | 0.22775401  | 0 | 0            | 0 |
| 0 | -0.024251781 | 0 | 0            | 0 | 0.016381822 | 0 | 0            | 0 |
| 0 | 0            | 0 | 0            | 0 | 0.016577113 | 0 | 0            | 0 |
| 0 | -0.026216251 | 0 | 0            | 0 | 0.016880159 | 0 | 0            | 0 |
| 0 | 0.085923296  | 0 | 0            | 0 | 0.016320314 | 0 | 0            | 0 |
| 0 | 0            | 0 | -0.23776633  | 0 | 0.21904021  | 0 | -0.051560888 | 0 |
| 0 | -0.028274724 | 0 | -0.23779046  | 0 | 0.21901799  | 0 | -0.051504483 | 0 |
| 0 | -0.026932513 | 0 | 0            | 0 | 0           | 0 | 0            | 0 |
| 0 | -0.028747173 | 0 | -0.000564811 | 0 | 0           | 0 | 0            | 0 |
| 0 | 0            | 0 | -0.000750676 | 0 | 0           | 0 | 0            | 0 |
| 0 | -0.027555949 | 0 | -4.91E-05    | 0 | 0           | 0 | 0            | 0 |
| 0 | 0            | 0 | -0.21417856  | 0 | 0.23070042  | 0 | -0.082451711 | 0 |
| 0 | -0.028123297 | 0 | -0.21419314  | 0 | 0.23069351  | 0 | -0.082411815 | 0 |
| 0 | 0.078906175  | 0 | -0.000973506 | 0 | 0           | 0 | 0            | 0 |
| 0 | 0            | 0 | 0.021630409  | 0 | 0           | 0 | -0.083618283 | 0 |
| 0 | 0.035406253  | 0 | 0.021561488  | 0 | 0           | 0 | -0.083673592 | 0 |
| 0 | -0.01813709  | 0 | 0            | 0 | 0.008629741 | 0 | -0.05194228  | 0 |
| 0 | 0            | 0 | 0            | 0 | 0.008657685 | 0 | -0.051966121 | 0 |
| 0 | -0.01996201  | 0 | -0.00746914  | 0 | 0           | 0 | -0.051373424 | 0 |
| 0 | 0            | 0 | -0.007435776 | 0 | 0           | 0 | -0.051393699 | 0 |
| 0 | -0.019109358 | 0 | 0            | 0 | 0           | 0 | -0.052134391 | 0 |
| 0 | 0            | 0 | 0            | 0 | 0           | 0 | -0.052130679 | 0 |
| 0 | -0.016634756 | 0 | 0            | 0 | 0           | 0 | -0.051609295 | 0 |
| 0 | 0            | 0 | 0            | 0 | 0.011396105 | 0 | -0.048595581 | 0 |
| 0 | -0.011036099 | 0 | 0.017552248  | 0 | 0           | 0 | -0.079306245 | 0 |
| 0 | 0            | 0 | -0.004978738 | 0 | 0           | 0 | -0.047318426 | 0 |
| 0 | 0            | 0 | -0.23734657  | 0 | 0.21997046  | 0 | -0.044879577 | 0 |
| 0 | 0.072748952  | 0 | -0.22009886  | 0 | 0.23666781  | 0 | 0            | 0 |
| 0 | 0            | 0 | -0.22002438  | 0 | 0.23668242  | 0 | 0            | 0 |
| 0 | -0.015714819 | 0 | 0            | 0 | 0           | 0 | -0.085281473 | 0 |
| 0 | -0.003426225 | 0 | 0            | 0 | 0.032013167 | 0 | -0.086844068 | 0 |
| 0 | 0            | 0 | -0.22810259  | 0 | 0.2146683   | 0 | -0.048534486 | 0 |
| 0 | -0.024323195 | 0 | -0.22813188  | 0 | 0.21465834  | 0 | -0.048490092 | 0 |
| 0 | 0            | 0 | 0            | 0 | 0.010115279 | 0 | 0            | 0 |
| 0 | 0            | 0 | -0.006149814 | 0 | 0           | 0 | 0            | 0 |
| 0 | 0            | 0 | -0.2269885   | 0 | 0.21602454  | 0 | -0.043260196 | 0 |
| 0 | 0.078745556  | 0 | -0.22220711  | 0 | 0.23497627  | 0 | 0            | 0 |
| 0 | 0            | 0 | -0.22213643  | 0 | 0.23492267  | 0 | 0            | 0 |
| 0 | 0.068132073  | 0 | -0.22245714  | 0 | 0.23574606  | 0 | 0            | 0 |
| 0 | -0.007352034 | 0 | 0.016075567  | 0 | 0           | 0 | -0.087277293 | 0 |

|   |              |   |              |   |              |   |              |   |
|---|--------------|---|--------------|---|--------------|---|--------------|---|
| 0 | 0            | 0 | -0.23146028  | 0 | 0.21095307   | 0 | -0.048893448 | 0 |
| 0 | -0.028214127 | 0 | -0.23147027  | 0 | 0.21094542   | 0 | -0.048860922 | 0 |
| 0 | -0.011416958 | 0 | -0.23164169  | 0 | 0.21088512   | 0 | -0.048723559 | 0 |
| 0 | 0            | 0 | -0.22287682  | 0 | 0.21501422   | 0 | -0.05891839  | 0 |
| 0 | -0.027462194 | 0 | -0.22284358  | 0 | 0.2150237    | 0 | -0.058913701 | 0 |
| 0 | -0.00953308  | 0 | -0.21646718  | 0 | 0.21656532   | 0 | -0.068554282 | 0 |
| 0 | 0            | 0 | 0            | 0 | 0.013433345  | 0 | -0.06662336  | 0 |
| 0 | -0.024242156 | 0 | 0            | 0 | 0.013473317  | 0 | -0.066596088 | 0 |
| 0 | 0            | 0 | -0.2159491   | 0 | 0.224061     | 0 | 0            | 0 |
| 0 | 0            | 0 | -0.002492637 | 0 | 0            | 0 | -0.066176451 | 0 |
| 0 | 0.023041395  | 0 | 0            | 0 | 0            | 0 | -0.066181807 | 0 |
| 0 | -0.026249117 | 0 | -0.002450772 | 0 | 0            | 0 | -0.066148488 | 0 |
| 0 | -0.011406758 | 0 | -0.23205784  | 0 | 0.21134473   | 0 | 0            | 0 |
| 0 | 0            | 0 | -0.23205315  | 0 | 0.21135068   | 0 | 0            | 0 |
| 0 | -0.021594492 | 0 | -0.23153985  | 0 | 0.21141886   | 0 | 0            | 0 |
| 0 | 0            | 0 | -0.22734042  | 0 | 0.21120859   | 0 | -0.068393469 | 0 |
| 0 | -0.037032681 | 0 | -0.22728888  | 0 | 0.2111705    | 0 | -0.068331734 | 0 |
| 0 | -0.027265459 | 0 | -0.009242931 | 0 | 0            | 0 | 0            | 0 |
| 0 | -0.00328708  | 0 | -0.00935715  | 0 | 0            | 0 | 0            | 0 |
| 0 | 0            | 0 | -0.009337981 | 0 | 0            | 0 | 0            | 0 |
| 0 | -0.005224064 | 0 | 0            | 0 | 0.021840011  | 0 | -0.07838495  | 0 |
| 0 | -0.022961447 | 0 | 0            | 0 | 0.006347953  | 0 | 0            | 0 |
| 0 | -0.001216829 | 0 | 0            | 0 | 0.006606017  | 0 | 0            | 0 |
| 0 | 0            | 0 | 0            | 0 | 0.006626032  | 0 | 0            | 0 |
| 0 | -0.014271806 | 0 | -0.025573891 | 0 | 0            | 0 | -0.049529105 | 0 |
| 0 | 0            | 0 | -0.02554631  | 0 | 0            | 0 | -0.049542786 | 0 |
| 0 | -0.028891079 | 0 | -0.02556417  | 0 | 0            | 0 | -0.049511711 | 0 |
| 0 | -0.025784419 | 0 | 0            | 0 | 0            | 0 | 0            | 0 |
| 0 | 0.03634007   | 0 | -0.22617171  | 0 | 0.20887371   | 0 | -0.064652682 | 0 |
| 0 | -0.008177552 | 0 | -0.2228524   | 0 | 0.2082715    | 0 | 0            | 0 |
| 0 | -0.021196163 | 0 | -0.22276192  | 0 | 0.20830383   | 0 | 0            | 0 |
| 0 | 0            | 0 | -0.22284933  | 0 | 0.2082804    | 0 | 0            | 0 |
| 0 | -0.00886983  | 0 | 0.007435959  | 0 | 0            | 0 | -0.079472782 | 0 |
| 0 | 0.067089172  | 0 | 0            | 0 | 0.025545077  | 0 | 0            | 0 |
| 0 | 0            | 0 | 0            | 0 | 0.025584297  | 0 | 0            | 0 |
| 0 | 0            | 0 | 0            | 0 | -0.011460144 | 0 | -0.049939786 | 0 |
| 0 | -0.027996524 | 0 | 0            | 0 | -0.011477212 | 0 | -0.049906767 | 0 |
| 0 | -0.00940618  | 0 | 0            | 0 | -0.011753931 | 0 | -0.049731976 | 0 |
| 0 | -0.025139774 | 0 | -0.019978898 | 0 | 0            | 0 | -0.047084201 | 0 |
| 0 | 0            | 0 | -0.019969858 | 0 | 0            | 0 | -0.047099375 | 0 |
| 0 | -0.012796379 | 0 | -0.020524463 | 0 | 0            | 0 | -0.046770987 | 0 |
| 0 | 0.045791959  | 0 | 0            | 0 | 0.022981316  | 0 | 0            | 0 |
| 0 | -0.01151661  | 0 | 0            | 0 | 0            | 0 | -0.050423717 | 0 |
| 0 | -0.014169781 | 0 | -0.22667413  | 0 | 0.20437769   | 0 | 0            | 0 |
| 0 | 0.06060412   | 0 | 0.008666078  | 0 | 0            | 0 | 0            | 0 |
| 0 | 0            | 0 | 0.008695366  | 0 | 0            | 0 | 0            | 0 |
| 0 | -0.023684747 | 0 | 0            | 0 | -0.005205053 | 0 | -0.047484634 | 0 |



|   |              |   |              |   |              |   |              |   |
|---|--------------|---|--------------|---|--------------|---|--------------|---|
| 0 | 0            | 0 | 0            | 0 | -0.005196358 | 0 | -0.047499524 | 0 |
| 0 | -0.017292245 | 0 | 0            | 0 | 0            | 0 | -0.047689006 | 0 |
| 0 | -0.009685307 | 0 | 0            | 0 | -0.006128656 | 0 | -0.046929161 | 0 |
| 0 | 0.049869309  | 0 | 0            | 0 | 0            | 0 | 0            | 0 |
| 0 | 0.046470871  | 0 | 0.006674336  | 0 | 0            | 0 | 0            | 0 |
| 0 | -0.014695022 | 0 | -0.027033796 | 0 | 0            | 0 | -0.047102047 | 0 |
| 0 | 0            | 0 | -0.21184085  | 0 | 0.21618048   | 0 | 0            | 0 |
| 0 | -0.004054112 | 0 | -0.21182848  | 0 | 0.21621227   | 0 | 0            | 0 |
| 0 | 0.059454151  | 0 | 0            | 0 | 0.019036619  | 0 | 0            | 0 |
| 0 | 0.010983414  | 0 | -0.015047837 | 0 | 0            | 0 | -0.057097375 | 0 |
| 0 | 0.009527863  | 0 | 0            | 0 | -0.000864221 | 0 | -0.056608141 | 0 |
| 0 | 0.05833505   | 0 | 0.002915133  | 0 | 0            | 0 | 0            | 0 |
| 0 | -0.012679894 | 0 | 0            | 0 | -0.013378952 | 0 | -0.047440735 | 0 |
| 0 | 0.001483842  | 0 | -0.21228093  | 0 | 0.20700894   | 0 | -0.087758132 | 0 |
| 0 | -0.01609166  | 0 | -0.0272966   | 0 | 0            | 0 | 0            | 0 |
| 0 | 0.036647511  | 0 | -0.21186348  | 0 | 0.20600048   | 0 | 0            | 0 |
| 0 | 0.042169493  | 0 | -0.02285067  | 0 | 0            | 0 | -0.065727433 | 0 |
| 0 | -0.020569238 | 0 | -0.021495204 | 0 | 0            | 0 | 0            | 0 |
| 0 | -0.014082557 | 0 | 0            | 0 | -0.013611581 | 0 | 0            | 0 |
| 0 | 0.043240311  | 0 | 0            | 0 | -0.009332519 | 0 | -0.065859489 | 0 |
| 0 | -0.019293361 | 0 | 0            | 0 | -0.007093657 | 0 | 0            | 0 |
| 0 | 0            | 0 | -0.18476016  | 0 | 0.22625068   | 0 | 0            | 0 |
| 0 | 0.060551316  | 0 | -0.18465127  | 0 | 0.22602644   | 0 | 0            | 0 |
| 0 | -0.018377965 | 0 | -0.18156373  | 0 | 0.22776867   | 0 | 0            | 0 |
| 0 | 0.046196558  | 0 | 0            | 0 | 0.010934066  | 0 | 0            | 0 |
| 0 | 0.046398499  | 0 | -0.004043432 | 0 | 0            | 0 | 0            | 0 |
| 0 | 0.068762151  | 0 | -0.2145198   | 0 | 0.19654573   | 0 | 0            | 0 |
| 0 | -0.015816195 | 0 | 0            | 0 | 0.045427291  | 0 | 0            | 0 |
| 0 | -0.013662049 | 0 | -0.18375837  | 0 | 0.21753762   | 0 | 0            | 0 |
| 0 | -0.015893078 | 0 | -0.18089784  | 0 | 0.2077305    | 0 | 0            | 0 |
| 0 | -0.019049085 | 0 | 0.030883437  | 0 | 0            | 0 | 0            | 0 |
| 0 | 0            | 0 | -0.23495126  | 0 | 0.27760047   | 0 | -0.055200552 | 0 |
| 0 | 0            | 0 | -0.2411859   | 0 | 0.27540673   | 0 | -0.05230275  | 0 |
| 0 | 0            | 0 | -0.2376647   | 0 | 0.27753567   | 0 | -0.055298209 | 0 |
| 0 | 0.017716727  | 0 | -0.23765345  | 0 | 0.27745625   | 0 | -0.055315076 | 0 |
| 0 | 0            | 0 | -0.23541587  | 0 | 0.27621757   | 0 | -0.057690168 | 0 |
| 0 | 0            | 0 | -0.23807163  | 0 | 0.27233889   | 0 | -0.050708169 | 0 |
| 0 | 0            | 0 | -0.23577538  | 0 | 0.27606042   | 0 | -0.057388267 | 0 |
| 0 | 0            | 0 | -0.24271503  | 0 | 0.27344311   | 0 | -0.045720645 | 0 |
| 0 | 0.02971802   | 0 | -0.24269673  | 0 | 0.27331642   | 0 | -0.045723132 | 0 |
| 0 | 0            | 0 | -0.22829152  | 0 | 0.26989606   | 0 | -0.054134811 | 0 |
| 0 | -0.04476015  | 0 | -0.22833918  | 0 | 0.26985709   | 0 | -0.054023819 | 0 |
| 0 | 0            | 0 | -0.23041342  | 0 | 0.27002126   | 0 | -0.055669969 | 0 |
| 0 | -0.033641623 | 0 | -0.23046157  | 0 | 0.27001794   | 0 | -0.055619126 | 0 |
| 0 | -0.03136092  | 0 | -0.2324017   | 0 | 0.26816679   | 0 | -0.052510234 | 0 |
| 0 | 0            | 0 | -0.23241779  | 0 | 0.26814491   | 0 | -0.052466356 | 0 |
| 0 | 0            | 0 | -0.23838262  | 0 | 0.2648447    | 0 | -0.045380733 | 0 |

|   |              |   |             |   |             |   |              |   |
|---|--------------|---|-------------|---|-------------|---|--------------|---|
| 0 | -0.032178566 | 0 | -0.2384069  | 0 | 0.26483801  | 0 | -0.045341342 | 0 |
| 0 | -0.016353165 | 0 | -0.23664602 | 0 | 0.26516577  | 0 | -0.047731287 | 0 |
| 0 | 0            | 0 | -0.23010746 | 0 | 0.27196957  | 0 | -0.046208143 | 0 |
| 0 | 0            | 0 | -0.23108285 | 0 | 0.26783567  | 0 | -0.052603638 | 0 |
| 0 | 0.020818721  | 0 | -0.23099483 | 0 | 0.26776932  | 0 | -0.052688343 | 0 |
| 0 | 0            | 0 | -0.23273001 | 0 | 0.26699816  | 0 | -0.050307404 | 0 |
| 0 | 0            | 0 | -0.22840405 | 0 | 0.2661492   | 0 | -0.055362153 | 0 |
| 0 | 0.02974815   | 0 | -0.2327121  | 0 | 0.26679449  | 0 | -0.050299636 | 0 |
| 0 | 0            | 0 | -0.23223357 | 0 | 0.26940985  | 0 | -0.044007363 | 0 |
| 0 | 0            | 0 | -0.22925184 | 0 | 0.270968    | 0 | -0.048392898 | 0 |
| 0 | -0.018423899 | 0 | -0.23669861 | 0 | 0.26458809  | 0 | -0.046072067 | 0 |
| 0 | 0            | 0 | -0.22641367 | 0 | 0.2691954   | 0 | -0.044233149 | 0 |
| 0 | -0.036942374 | 0 | -0.23304868 | 0 | 0.25894343  | 0 | -0.042283871 | 0 |
| 0 | 0            | 0 | -0.23305826 | 0 | 0.25889906  | 0 | -0.042206973 | 0 |
| 0 | 0            | 0 | -0.22842845 | 0 | 0.27126545  | 0 | 0            | 0 |
| 0 | 0.022222715  | 0 | -0.22840569 | 0 | 0.27115919  | 0 | 0            | 0 |
| 0 | -0.022605665 | 0 | -0.22993199 | 0 | 0.26932041  | 0 | 0            | 0 |
| 0 | 0            | 0 | -0.22944969 | 0 | 0.26951852  | 0 | 0            | 0 |
| 0 | 0            | 0 | -0.2296299  | 0 | 0.26943535  | 0 | 0            | 0 |
| 0 | 0.025364143  | 0 | -0.22933211 | 0 | 0.26943128  | 0 | 0            | 0 |
| 0 | 0.026284342  | 0 | -0.22962924 | 0 | 0.26929472  | 0 | 0            | 0 |
| 0 | 0            | 0 | -0.2281791  | 0 | 0.26783215  | 0 | 0            | 0 |
| 0 | 0            | 0 | -0.22839561 | 0 | 0.26769408  | 0 | 0            | 0 |
| 0 | 0            | 0 | -0.2272214  | 0 | 0.26680599  | 0 | 0            | 0 |
| 0 | 0            | 0 | 0           | 0 | 0.050304354 | 0 | -0.054262798 | 0 |
| 0 | 0            | 0 | 0           | 0 | 0.046262858 | 0 | -0.05255392  | 0 |
| 0 | 0            | 0 | 0           | 0 | 0.051409004 | 0 | -0.05395131  | 0 |
| 0 | 0            | 0 | 0           | 0 | 0.050199626 | 0 | -0.052810738 | 0 |
| 0 | 0.003962572  | 0 | 0           | 0 | 0.050202964 | 0 | -0.052839146 | 0 |
| 0 | 0            | 0 | -0.23045727 | 0 | 0.26825689  | 0 | 0            | 0 |
| 0 | 0            | 0 | 0           | 0 | 0.042957651 | 0 | -0.048674012 | 0 |
| 0 | -0.033386968 | 0 | -0.22248521 | 0 | 0.25942218  | 0 | -0.053060634 | 0 |
| 0 | 0.020163833  | 0 | 0           | 0 | 0.042893987 | 0 | -0.048687105 | 0 |
| 0 | 0            | 0 | -0.22247209 | 0 | 0.25942253  | 0 | -0.05308216  | 0 |
| 0 | 0.034107599  | 0 | -0.23030166 | 0 | 0.26813233  | 0 | 0            | 0 |
| 0 | -0.011579448 | 0 | -0.223428   | 0 | 0.25879136  | 0 | -0.052195245 | 0 |
| 0 | -0.016099399 | 0 | -0.24054357 | 0 | 0.25016541  | 0 | -0.031318848 | 0 |
| 0 | 0            | 0 | -0.2251158  | 0 | 0.26861126  | 0 | 0            | 0 |
| 0 | 0.022694449  | 0 | -0.22511668 | 0 | 0.26851984  | 0 | 0            | 0 |
| 0 | 0            | 0 | 0           | 0 | 0.048987422 | 0 | -0.054417941 | 0 |
| 0 | 0.013855286  | 0 | 0           | 0 | 0.048896781 | 0 | -0.054433605 | 0 |
| 0 | 0            | 0 | 0           | 0 | 0.043926413 | 0 | -0.047654174 | 0 |
| 0 | 0.021094584  | 0 | 0           | 0 | 0.043775424 | 0 | -0.047651773 | 0 |
| 0 | 0            | 0 | 0           | 0 | 0.04937071  | 0 | -0.056144597 | 0 |
| 0 | -0.024468492 | 0 | -0.22258053 | 0 | 0.2691203   | 0 | 0            | 0 |
| 0 | 0            | 0 | -0.22711071 | 0 | 0.26419693  | 0 | 0            | 0 |
| 0 | 0            | 0 | 0           | 0 | 0.048110408 | 0 | -0.054078525 | 0 |

|   |              |   |             |             |   |              |   |
|---|--------------|---|-------------|-------------|---|--------------|---|
| 0 | 0.012285807  | 0 | 0           | 0.048120241 | 0 | -0.054137289 | 0 |
| 0 | -0.014687204 | 0 | 0           | 0.044937438 | 0 | -0.051679149 | 0 |
| 0 | 0            | 0 | -0.24760574 | 0.26127864  | 0 | -0.054078516 | 0 |
| 0 | -0.023012103 | 0 | -0.22395276 | 0.26299423  | 0 | 0            | 0 |
| 0 | 0            | 0 | -0.22391735 | 0.26300078  | 0 | 0            | 0 |
| 0 | 0.071427966  | 0 | -0.24745171 | 0.26099834  | 0 | -0.054297481 | 0 |
| 0 | -0.021143006 | 0 | -0.2257902  | 0.26164373  | 0 | 0            | 0 |
| 0 | 0            | 0 | -0.22580453 | 0.26163547  | 0 | 0            | 0 |
| 0 | -0.018825877 | 0 | -0.22754136 | 0.26066727  | 0 | 0            | 0 |
| 0 | -0.014097656 | 0 | 0           | 0.03585782  | 0 | -0.042118519 | 0 |
| 0 | -0.026204059 | 0 | -0.22225051 | 0.26128539  | 0 | 0            | 0 |
| 0 | -0.018448732 | 0 | -0.22232298 | 0.26124447  | 0 | 0            | 0 |
| 0 | 0            | 0 | -0.22224641 | 0.26129366  | 0 | 0            | 0 |
| 0 | 0            | 0 | 0           | 0.049196583 | 0 | -0.053638092 | 0 |
| 0 | -0.040932768 | 0 | 0           | 0.049119705 | 0 | -0.053538788 | 0 |
| 0 | 0            | 0 | -0.22415146 | 0.26382003  | 0 | 0            | 0 |
| 0 | 0            | 0 | 0           | 0.050246668 | 0 | -0.053311522 | 0 |
| 0 | -0.044103543 | 0 | 0           | 0.050221643 | 0 | -0.053249087 | 0 |
| 0 | -0.052569935 | 0 | -0.2275162  | 0.25084031  | 0 | -0.042699776 | 0 |
| 0 | -0.00591825  | 0 | 0           | 0.048923042 | 0 | -0.052538551 | 0 |
| 0 | 0            | 0 | 0.029030934 | 0           | 0 | -0.053020296 | 0 |
| 0 | 0            | 0 | 0.026863999 | 0           | 0 | -0.052133476 | 0 |
| 0 | 0            | 0 | 0.024830122 | 0           | 0 | -0.049807181 | 0 |
| 0 | 0.012325809  | 0 | 0.02477321  | 0           | 0 | -0.049817024 | 0 |
| 0 | -0.01508155  | 0 | -0.22363005 | 0.26072909  | 0 | 0            | 0 |
| 0 | -0.038995299 | 0 | -0.22609458 | 0.25595245  | 0 | 0            | 0 |
| 0 | 0            | 0 | -0.22362087 | 0.2607292   | 0 | 0            | 0 |
| 0 | -0.023111321 | 0 | -0.22388166 | 0.26063381  | 0 | 0            | 0 |
| 0 | -0.02393777  | 0 | -0.22305842 | 0.26102967  | 0 | 0            | 0 |
| 0 | 0            | 0 | 0.029798017 | 0           | 0 | -0.052459544 | 0 |
| 0 | 0            | 0 | 0.029010341 | 0           | 0 | -0.051739127 | 0 |
| 0 | 0.002493536  | 0 | 0.029009571 | 0           | 0 | -0.051760518 | 0 |
| 0 | -0.033407106 | 0 | 0           | 0.048557672 | 0 | -0.054836473 | 0 |
| 0 | 0            | 0 | 0           | 0.048571213 | 0 | -0.054859981 | 0 |
| 0 | -0.033764166 | 0 | 0           | 0.041173447 | 0 | -0.048072236 | 0 |
| 0 | 0            | 0 | 0           | 0.041138264 | 0 | -0.048025369 | 0 |
| 0 | -0.010357123 | 0 | 0           | 0.046958973 | 0 | -0.053941707 | 0 |
| 0 | 0            | 0 | 0.024536109 | 0           | 0 | -0.048094495 | 0 |
| 0 | 0.014625621  | 0 | 0.024421223 | 0           | 0 | -0.048097446 | 0 |
| 0 | 0            | 0 | -0.22506217 | 0.26000383  | 0 | 0            | 0 |
| 0 | -0.025038932 | 0 | -0.2254415  | 0.25984085  | 0 | 0            | 0 |
| 0 | 0.037419718  | 0 | -0.22492474 | 0.25984411  | 0 | 0            | 0 |
| 0 | -0.024976032 | 0 | -0.22367834 | 0.26045639  | 0 | 0            | 0 |
| 0 | -0.037448797 | 0 | 0           | 0.042393119 | 0 | -0.05008874  | 0 |
| 0 | 0            | 0 | 0.029046999 | 0           | 0 | -0.054295637 | 0 |
| 0 | 0.008227556  | 0 | 0.028982335 | 0           | 0 | -0.054311113 | 0 |
| 0 | 0            | 0 | 0.027938698 | 0           | 0 | -0.054576145 | 0 |



|   |              |   |             |   |             |   |              |   |
|---|--------------|---|-------------|---|-------------|---|--------------|---|
| 0 | 0            | 0 | 0           | 0 | 0.048283894 | 0 | 0            | 0 |
| 0 | -0.019861763 | 0 | 0           | 0 | 0.047613145 | 0 | 0            | 0 |
| 0 | 0            | 0 | 0           | 0 | 0.047516193 | 0 | 0            | 0 |
| 0 | 0.021857437  | 0 | 0           | 0 | 0.048181808 | 0 | 0            | 0 |
| 0 | 0.02252675   | 0 | 0           | 0 | 0.04754101  | 0 | 0            | 0 |
| 0 | -0.032797405 | 0 | 0           | 0 | 0           | 0 | -0.048876864 | 0 |
| 0 | 0            | 0 | 0           | 0 | 0.047754526 | 0 | 0            | 0 |
| 0 | -0.019576301 | 0 | 0           | 0 | 0.047360727 | 0 | 0            | 0 |
| 0 | 0.021291595  | 0 | 0           | 0 | 0.047748129 | 0 | 0            | 0 |
| 0 | -0.02591798  | 0 | 0           | 0 | 0.046093942 | 0 | 0            | 0 |
| 0 | 0            | 0 | 0           | 0 | 0.047329696 | 0 | 0            | 0 |
| 0 | -0.025854026 | 0 | -0.21748994 | 0 | 0.25115425  | 0 | 0            | 0 |
| 0 | -0.02191326  | 0 | 0           | 0 | 0           | 0 | -0.050719158 | 0 |
| 0 | 0            | 0 | 0.025214568 | 0 | 0           | 0 | -0.050813191 | 0 |
| 0 | 0.014610762  | 0 | 0.025205527 | 0 | 0           | 0 | -0.05089016  | 0 |
| 0 | -0.026364429 | 0 | 0           | 0 | 0           | 0 | -0.05223921  | 0 |
| 0 | 0            | 0 | 0.029541363 | 0 | 0           | 0 | -0.044103519 | 0 |
| 0 | -0.017442525 | 0 | 0.023919236 | 0 | 0           | 0 | -0.050084553 | 0 |
| 0 | -0.023396304 | 0 | 0           | 0 | 0.044537863 | 0 | -0.051739689 | 0 |
| 0 | -0.034902832 | 0 | 0.022125653 | 0 | 0           | 0 | -0.048363363 | 0 |
| 0 | 0            | 0 | -0.23877909 | 0 | 0.25432203  | 0 | 0            | 0 |
| 0 | 0.080929009  | 0 | -0.23854316 | 0 | 0.25395741  | 0 | 0            | 0 |
| 0 | -0.04810335  | 0 | 0.015134428 | 0 | 0           | 0 | -0.041248061 | 0 |
| 0 | 0            | 0 | 0           | 0 | 0.045735085 | 0 | 0            | 0 |
| 0 | -0.022801721 | 0 | 0           | 0 | 0.045125015 | 0 | 0            | 0 |
| 0 | 0.029818221  | 0 | 0           | 0 | 0.045712233 | 0 | 0            | 0 |
| 0 | -0.029618686 | 0 | -0.24097028 | 0 | 0.2525908   | 0 | 0            | 0 |
| 0 | -0.017497352 | 0 | 0           | 0 | 0.049666149 | 0 | 0            | 0 |
| 0 | 0            | 0 | -0.2411291  | 0 | 0.25254119  | 0 | 0            | 0 |
| 0 | 0.087358311  | 0 | -0.24099237 | 0 | 0.25212601  | 0 | 0            | 0 |
| 0 | -0.029291622 | 0 | 0           | 0 | 0           | 0 | -0.049761117 | 0 |
| 0 | -0.023218687 | 0 | 0           | 0 | 0.046716691 | 0 | 0            | 0 |
| 0 | 0            | 0 | 0           | 0 | 0.046727675 | 0 | 0            | 0 |
| 0 | -0.016549373 | 0 | 0           | 0 | 0.046306259 | 0 | 0            | 0 |
| 0 | 0            | 0 | -0.23352679 | 0 | 0.25050789  | 0 | -0.067098148 | 0 |
| 0 | 0.059781106  | 0 | -0.23355799 | 0 | 0.25041455  | 0 | -0.067014966 | 0 |
| 0 | 0.060466104  | 0 | -0.23603928 | 0 | 0.2520865   | 0 | -0.072115678 | 0 |
| 0 | 0            | 0 | -0.23600625 | 0 | 0.25210065  | 0 | -0.072192004 | 0 |
| 0 | -0.030677866 | 0 | 0           | 0 | 0.04235928  | 0 | 0            | 0 |
| 0 | 0            | 0 | 0.02688127  | 0 | 0           | 0 | 0            | 0 |
| 0 | -0.016192568 | 0 | 0           | 0 | 0.046545319 | 0 | 0            | 0 |
| 0 | 0.020736452  | 0 | 0.026908072 | 0 | 0           | 0 | 0            | 0 |
| 0 | 0            | 0 | -0.23788564 | 0 | 0.23759111  | 0 | -0.059633002 | 0 |
| 0 | 0            | 0 | 0.028814631 | 0 | 0           | 0 | 0            | 0 |
| 0 | 0.030035625  | 0 | -0.23515437 | 0 | 0.25051306  | 0 | -0.069316599 | 0 |
| 0 | 0.016337741  | 0 | 0.028738632 | 0 | 0           | 0 | 0            | 0 |
| 0 | -0.023755511 | 0 | 0.030167084 | 0 | 0           | 0 | 0            | 0 |

|   |              |   |             |   |             |   |              |   |
|---|--------------|---|-------------|---|-------------|---|--------------|---|
| 0 | 0            | 0 | 0           | 0 | 0.024858013 | 0 | -0.052771378 | 0 |
| 0 | 0            | 0 | -0.23160986 | 0 | 0.24602538  | 0 | -0.076002355 | 0 |
| 0 | 0.061820966  | 0 | 0           | 0 | 0.024776539 | 0 | -0.052966514 | 0 |
| 0 | -0.023735704 | 0 | 0.026819273 | 0 | 0           | 0 | 0            | 0 |
| 0 | -0.022291136 | 0 | 0.027236491 | 0 | 0           | 0 | 0            | 0 |
| 0 | 0            | 0 | 0.026789797 | 0 | 0           | 0 | 0            | 0 |
| 0 | 0.019484527  | 0 | 0.026787321 | 0 | 0           | 0 | 0            | 0 |
| 0 | 0            | 0 | 0.026491745 | 0 | 0           | 0 | 0            | 0 |
| 0 | -0.024542077 | 0 | 0.024430952 | 0 | 0           | 0 | -0.050567053 | 0 |
| 0 | -0.024941338 | 0 | 0           | 0 | 0.044637112 | 0 | 0            | 0 |
| 0 | 0            | 0 | 0           | 0 | 0.021085651 | 0 | -0.052649337 | 0 |
| 0 | -0.016849763 | 0 | 0           | 0 | 0.020281207 | 0 | -0.052126525 | 0 |
| 0 | 0.069941958  | 0 | 0           | 0 | 0.020862079 | 0 | -0.052813642 | 0 |
| 0 | 0            | 0 | 0           | 0 | 0           | 0 | 0            | 0 |
| 0 | 0.019617364  | 0 | 0           | 0 | 0           | 0 | 0            | 0 |
| 0 | -0.03187672  | 0 | 0           | 0 | 0           | 0 | 0            | 0 |
| 0 | 0            | 0 | 0.006585605 | 0 | 0           | 0 | -0.051974969 | 0 |
| 0 | -0.027587924 | 0 | 0.024739569 | 0 | 0           | 0 | 0            | 0 |
| 0 | 0            | 0 | 0.024918908 | 0 | 0           | 0 | 0            | 0 |
| 0 | 0            | 0 | 0           | 0 | 0           | 0 | -0.052050774 | 0 |
| 0 | 0.02761865   | 0 | 0.024907213 | 0 | 0           | 0 | 0            | 0 |
| 0 | 0.055185576  | 0 | 0.006505674 | 0 | 0           | 0 | -0.052160088 | 0 |
| 0 | -0.024274121 | 0 | 0           | 0 | 0           | 0 | -0.051745894 | 0 |
| 0 | 0.052856704  | 0 | 0           | 0 | 0           | 0 | -0.052208514 | 0 |
| 0 | 0            | 0 | -0.22060509 | 0 | 0.25367744  | 0 | -0.087316617 | 0 |
| 0 | 0.043319056  | 0 | -0.22055454 | 0 | 0.25354739  | 0 | -0.087377653 | 0 |
| 0 | -0.025302299 | 0 | 0           | 0 | 0           | 0 | 0            | 0 |
| 0 | -0.027792335 | 0 | -0.23701521 | 0 | 0.24647206  | 0 | 0            | 0 |
| 0 | 0            | 0 | -0.23701161 | 0 | 0.24636862  | 0 | 0            | 0 |
| 0 | -0.027667446 | 0 | -0.23607901 | 0 | 0.24621207  | 0 | 0            | 0 |
| 0 | -0.015150623 | 0 | 0           | 0 | 0           | 0 | 0            | 0 |
| 0 | 0.088779614  | 0 | -0.23685014 | 0 | 0.24594608  | 0 | 0            | 0 |
| 0 | -0.028071694 | 0 | 0           | 0 | 0.042584537 | 0 | 0            | 0 |
| 0 | -0.014769814 | 0 | 0.030437467 | 0 | 0           | 0 | 0            | 0 |
| 0 | 0            | 0 | 0.003202185 | 0 | 0           | 0 | -0.051749161 | 0 |
| 0 | -0.021662819 | 0 | 0.00274619  | 0 | 0           | 0 | -0.051460371 | 0 |
| 0 | -0.026147415 | 0 | 0           | 0 | 0           | 0 | -0.05161659  | 0 |
| 0 | 0.062032723  | 0 | 0.00300488  | 0 | 0           | 0 | -0.051894907 | 0 |
| 0 | -0.023733194 | 0 | 0.026238679 | 0 | 0           | 0 | 0            | 0 |
| 0 | -0.021657989 | 0 | 0.026228582 | 0 | 0           | 0 | 0            | 0 |
| 0 | 0            | 0 | 0.026250711 | 0 | 0           | 0 | 0            | 0 |
| 0 | -0.009677251 | 0 | -0.22218037 | 0 | 0.25027933  | 0 | -0.082161725 | 0 |
| 0 | -0.027317377 | 0 | 0.023895866 | 0 | 0           | 0 | 0            | 0 |
| 0 | -0.030507947 | 0 | 0           | 0 | 0           | 0 | 0            | 0 |
| 0 | -0.020180514 | 0 | 0.026191201 | 0 | 0           | 0 | 0            | 0 |
| 0 | -0.018531557 | 0 | -0.23474555 | 0 | 0.23619424  | 0 | -0.053712473 | 0 |
| 0 | 0            | 0 | -0.23472406 | 0 | 0.23620129  | 0 | -0.05373456  | 0 |

|   |              |   |              |   |             |   |              |   |
|---|--------------|---|--------------|---|-------------|---|--------------|---|
| 0 | 0            | 0 | -0.23374651  | 0 | 0.23776544  | 0 | -0.050112788 | 0 |
| 0 | 0            | 0 | 0            | 0 | 0.016817929 | 0 | -0.060252383 | 0 |
| 0 | -0.023672558 | 0 | 0            | 0 | 0           | 0 | 0            | 0 |
| 0 | -0.026051872 | 0 | 0.02438415   | 0 | 0           | 0 | 0            | 0 |
| 0 | 0            | 0 | 0            | 0 | 0.019086287 | 0 | -0.050288721 | 0 |
| 0 | -0.024768697 | 0 | 0            | 0 | 0.019475624 | 0 | -0.050256052 | 0 |
| 0 | 0            | 0 | -0.000380504 | 0 | 0           | 0 | -0.058591686 | 0 |
| 0 | -0.01480954  | 0 | 0            | 0 | 0.018087323 | 0 | -0.049703022 | 0 |
| 0 | 0.071417076  | 0 | 0            | 0 | 0.018873975 | 0 | -0.050452578 | 0 |
| 0 | 0            | 0 | -0.23326556  | 0 | 0.23596716  | 0 | 0            | 0 |
| 0 | -0.029131388 | 0 | 0.02243237   | 0 | 0           | 0 | 0            | 0 |
| 0 | -0.025581296 | 0 | 0            | 0 | 0           | 0 | -0.049453155 | 0 |
| 0 | 0            | 0 | 0.00126726   | 0 | 0           | 0 | -0.049502183 | 0 |
| 0 | -0.02033595  | 0 | 0.000667985  | 0 | 0           | 0 | -0.049146977 | 0 |
| 0 | -0.026159414 | 0 | 0.002062991  | 0 | 0           | 0 | -0.049439088 | 0 |
| 0 | 0.06439801   | 0 | 0.001079123  | 0 | 0           | 0 | -0.049648022 | 0 |
| 0 | -0.005759308 | 0 | -0.2213802   | 0 | 0.24831526  | 0 | -0.091121402 | 0 |
| 0 | 0.049655145  | 0 | 0            | 0 | 0.028921546 | 0 | -0.069262872 | 0 |
| 0 | 0            | 0 | 0            | 0 | 0.028981135 | 0 | -0.069320105 | 0 |
| 0 | -0.026795278 | 0 | 0            | 0 | 0.022353754 | 0 | 0            | 0 |
| 0 | 0            | 0 | 0            | 0 | 0.022620757 | 0 | 0            | 0 |
| 0 | 0.078165198  | 0 | 0            | 0 | 0.022387686 | 0 | 0            | 0 |
| 0 | 0.042924837  | 0 | 0.010920876  | 0 | 0           | 0 | -0.068453713 | 0 |
| 0 | 0            | 0 | 0.010966322  | 0 | 0           | 0 | -0.068507226 | 0 |
| 0 | -0.025970689 | 0 | 0            | 0 | 0.01819281  | 0 | 0            | 0 |
| 0 | 0.026017002  | 0 | 0            | 0 | 0           | 0 | -0.068182976 | 0 |
| 0 | 0.019384059  | 0 | 0            | 0 | 0.023669805 | 0 | -0.064452811 | 0 |
| 0 | -0.031161086 | 0 | 0.004644476  | 0 | 0           | 0 | 0            | 0 |
| 0 | 0            | 0 | 0.004517127  | 0 | 0           | 0 | 0            | 0 |
| 0 | -0.030179287 | 0 | 0            | 0 | 0           | 0 | 0            | 0 |
| 0 | 0.071428849  | 0 | 0.004315285  | 0 | 0           | 0 | 0            | 0 |
| 0 | 0            | 0 | -0.2248204   | 0 | 0.23134845  | 0 | -0.06905128  | 0 |
| 0 | -0.025052977 | 0 | -0.22477708  | 0 | 0.23135182  | 0 | -0.069014878 | 0 |
| 0 | 0.035028345  | 0 | 0            | 0 | 0.022583203 | 0 | -0.069517687 | 0 |
| 0 | -0.027376946 | 0 | 0.000864116  | 0 | 0           | 0 | 0            | 0 |
| 0 | -0.007183819 | 0 | 0            | 0 | 0.038163885 | 0 | -0.083020194 | 0 |
| 0 | 0.020199499  | 0 | 0.006445841  | 0 | 0           | 0 | -0.06424144  | 0 |
| 0 | 0.034075728  | 0 | 0.005378331  | 0 | 0           | 0 | -0.068748296 | 0 |
| 0 | -0.026469842 | 0 | -0.22836382  | 0 | 0.22764592  | 0 | 0            | 0 |
| 0 | 0            | 0 | -0.22836241  | 0 | 0.22764328  | 0 | 0            | 0 |
| 0 | -0.001156215 | 0 | -0.22837262  | 0 | 0.22761513  | 0 | 0            | 0 |
| 0 | -0.025949547 | 0 | 0            | 0 | 0.016567494 | 0 | 0            | 0 |
| 0 | -0.012667449 | 0 | -0.23779661  | 0 | 0.21904835  | 0 | -0.05155462  | 0 |
| 0 | 0            | 0 | -0.23770743  | 0 | 0.21904523  | 0 | -0.051602075 | 0 |
| 0 | -0.028269697 | 0 | -0.23771836  | 0 | 0.2190387   | 0 | -0.051570536 | 0 |
| 0 | -0.026979691 | 0 | -0.000761024 | 0 | 0           | 0 | 0            | 0 |
| 0 | -0.007198329 | 0 | -0.21418829  | 0 | 0.23069909  | 0 | -0.082449718 | 0 |

|   |              |   |              |   |              |              |   |
|---|--------------|---|--------------|---|--------------|--------------|---|
| 0 | -0.010886103 | 0 | 0.02161438   | 0 | 0            | -0.083614968 | 0 |
| 0 | -0.017989354 | 0 | 0            | 0 | 0.009777759  | -0.052660039 | 0 |
| 0 | 0            | 0 | 0            | 0 | 0.009788699  | -0.052652009 | 0 |
| 0 | -0.019867556 | 0 | -0.006723737 | 0 | 0            | -0.051829281 | 0 |
| 0 | -0.012485277 | 0 | 0            | 0 | 0.008611869  | -0.051949147 | 0 |
| 0 | 0            | 0 | -0.00671198  | 0 | 0            | -0.051820046 | 0 |
| 0 | -0.0187747   | 0 | -0.007467901 | 0 | 0            | -0.051376673 | 0 |
| 0 | -0.02475744  | 0 | 0            | 0 | 0            | -0.05212301  | 0 |
| 0 | 0.069027737  | 0 | -0.21956529  | 0 | 0.2386833    | 0            | 0 |
| 0 | 0            | 0 | -0.21949176  | 0 | 0.23864948   | 0            | 0 |
| 0 | 0.049088887  | 0 | -0.22008989  | 0 | 0.23673045   | 0            | 0 |
| 0 | -0.024241296 | 0 | -0.22765763  | 0 | 0.21486339   | -0.048907289 | 0 |
| 0 | 0            | 0 | -0.22765099  | 0 | 0.21486579   | -0.048921729 | 0 |
| 0 | -0.012476212 | 0 | -0.22812321  | 0 | 0.21466057   | -0.048526338 | 0 |
| 0 | 0.062139144  | 0 | -0.22217863  | 0 | 0.23498424   | 0            | 0 |
| 0 | -0.013527382 | 0 | -0.2313989   | 0 | 0.210882     | -0.048876248 | 0 |
| 0 | 0.011433041  | 0 | -0.22288623  | 0 | 0.21501633   | -0.058895209 | 0 |
| 0 | 0.022773966  | 0 | 0            | 0 | 0.013431143  | -0.06658474  | 0 |
| 0 | 0.023113998  | 0 | -0.002496535 | 0 | 0            | -0.06613594  | 0 |
| 0 | -0.015288986 | 0 | -0.23206001  | 0 | 0.21134546   | 0            | 0 |
| 0 | 0.045146052  | 0 | -0.2273738   | 0 | 0.21126493   | -0.068315573 | 0 |
| 0 | -0.026262837 | 0 | -0.009345214 | 0 | 0            | 0            | 0 |
| 0 | -0.025387971 | 0 | 0            | 0 | 0.006616792  | 0            | 0 |
| 0 | -0.01410329  | 0 | -0.025558895 | 0 | 0            | -0.049539306 | 0 |
| 0 | -0.020111616 | 0 | -0.22285565  | 0 | 0.20827631   | 0            | 0 |
| 0 | 0.049987507  | 0 | 0            | 0 | 0.025585802  | 0            | 0 |
| 0 | -0.01005681  | 0 | 0            | 0 | -0.01147139  | -0.049928578 | 0 |
| 0 | -0.019068966 | 0 | -0.019979615 | 0 | 0            | -0.047096052 | 0 |
| 0 | 0.049251037  | 0 | 0.008689278  | 0 | 0            | 0            | 0 |
| 0 | -0.0177539   | 0 | 0            | 0 | -0.005205433 | -0.047496413 | 0 |
| 0 | 0.04895683   | 0 | -0.21189138  | 0 | 0.21622599   | 0            | 0 |
| 0 | -0.018112083 | 0 | -0.18477994  | 0 | 0.22624401   | 0            | 0 |
| 0 | 0            | 0 | -0.23646656  | 0 | 0.27925361   | -0.056387567 | 0 |
| 0 | 0            | 0 | -0.2380313   | 0 | 0.27756886   | -0.055044317 | 0 |
| 0 | 0            | 0 | -0.24100859  | 0 | 0.2785781    | -0.051985262 | 0 |
| 0 | 0.019729022  | 0 | -0.24099268  | 0 | 0.27849492   | -0.052005818 | 0 |
| 0 | 0            | 0 | -0.23427765  | 0 | 0.27792973   | -0.055778608 | 0 |
| 0 | 0            | 0 | -0.23553516  | 0 | 0.27828833   | -0.054474009 | 0 |
| 0 | 0.00764186   | 0 | -0.23549612  | 0 | 0.27825785   | -0.054517834 | 0 |
| 0 | 0            | 0 | -0.23861954  | 0 | 0.27593697   | -0.05012611  | 0 |
| 0 | 0.022092377  | 0 | -0.23861016  | 0 | 0.27577871   | -0.050112793 | 0 |
| 0 | 0            | 0 | -0.23576242  | 0 | 0.2782788    | -0.057033762 | 0 |
| 0 | 0.014820813  | 0 | -0.23575755  | 0 | 0.27818403   | -0.057047803 | 0 |
| 0 | 0            | 0 | -0.2370886   | 0 | 0.27771846   | -0.055854634 | 0 |
| 0 | -0.017510767 | 0 | -0.23768319  | 0 | 0.27752936   | -0.055287543 | 0 |
| 0 | 0.016156268  | 0 | -0.23699786  | 0 | 0.27764552   | -0.055931816 | 0 |
| 0 | 0            | 0 | -0.23500065  | 0 | 0.27655075   | -0.058123665 | 0 |



|   |              |   |             |   |             |   |              |   |
|---|--------------|---|-------------|---|-------------|---|--------------|---|
| 0 | -0.016900741 | 0 | -0.24273126 | 0 | 0.27343552  | 0 | -0.045710632 | 0 |
| 0 | 0            | 0 | -0.23043758 | 0 | 0.2722635   | 0 | -0.055354965 | 0 |
| 0 | -0.041139082 | 0 | -0.23049242 | 0 | 0.27223928  | 0 | -0.055261444 | 0 |
| 0 | 0            | 0 | -0.22759979 | 0 | 0.27026083  | 0 | -0.054734404 | 0 |
| 0 | -0.044657304 | 0 | -0.22760719 | 0 | 0.27024567  | 0 | -0.054675507 | 0 |
| 0 | -0.009036395 | 0 | -0.22830256 | 0 | 0.26988964  | 0 | -0.054126117 | 0 |
| 0 | -0.034748293 | 0 | -0.23389346 | 0 | 0.26829674  | 0 | -0.050319704 | 0 |
| 0 | 0            | 0 | -0.23390818 | 0 | 0.26827203  | 0 | -0.050277572 | 0 |
| 0 | -0.033607424 | 0 | -0.2295836  | 0 | 0.27051408  | 0 | -0.056389243 | 0 |
| 0 | 0            | 0 | -0.22957136 | 0 | 0.27051554  | 0 | -0.056410181 | 0 |
| 0 | -0.013668784 | 0 | -0.23043111 | 0 | 0.27001341  | 0 | -0.055657267 | 0 |
| 0 | -0.035983906 | 0 | -0.23239804 | 0 | 0.26817135  | 0 | -0.05250886  | 0 |
| 0 | -0.015461749 | 0 | -0.23840162 | 0 | 0.26484034  | 0 | -0.045372525 | 0 |
| 0 | 0            | 0 | -0.22930961 | 0 | 0.27242184  | 0 | -0.046973173 | 0 |
| 0 | 0            | 0 | -0.23016277 | 0 | 0.26841674  | 0 | -0.053440196 | 0 |
| 0 | 0.020601941  | 0 | -0.23007106 | 0 | 0.26831516  | 0 | -0.05352922  | 0 |
| 0 | -0.015618669 | 0 | -0.23112266 | 0 | 0.26784188  | 0 | -0.052582215 | 0 |
| 0 | -0.036892846 | 0 | -0.2327059  | 0 | 0.26701896  | 0 | -0.050351911 | 0 |
| 0 | -0.051797446 | 0 | -0.23303691 | 0 | 0.25896489  | 0 | -0.042283904 | 0 |
| 0 | 0            | 0 | -0.23062958 | 0 | 0.27078288  | 0 | 0            | 0 |
| 0 | 0.026820413  | 0 | -0.23049689 | 0 | 0.27068287  | 0 | 0            | 0 |
| 0 | 0            | 0 | -0.22914558 | 0 | 0.27107459  | 0 | 0            | 0 |
| 0 | -0.022883251 | 0 | -0.22845521 | 0 | 0.27125885  | 0 | 0            | 0 |
| 0 | 0.023168839  | 0 | -0.22913761 | 0 | 0.27096443  | 0 | 0            | 0 |
| 0 | -0.022471591 | 0 | -0.22948228 | 0 | 0.26950916  | 0 | 0            | 0 |
| 0 | -0.023755875 | 0 | -0.22961025 | 0 | 0.26944709  | 0 | 0            | 0 |
| 0 | 0            | 0 | -0.22940171 | 0 | 0.26951435  | 0 | 0            | 0 |
| 0 | 0.025370039  | 0 | -0.22932298 | 0 | 0.26943038  | 0 | 0            | 0 |
| 0 | 0            | 0 | -0.22818547 | 0 | 0.26783048  | 0 | 0            | 0 |
| 0 | 0            | 0 | 0           | 0 | 0.051610694 | 0 | -0.055046483 | 0 |
| 0 | 0            | 0 | 0           | 0 | 0.050391627 | 0 | -0.053758995 | 0 |
| 0 | 0.005350952  | 0 | 0           | 0 | 0.050396572 | 0 | -0.05379299  | 0 |
| 0 | 0            | 0 | 0           | 0 | 0.047956918 | 0 | -0.0518823   | 0 |
| 0 | 0.014544244  | 0 | 0           | 0 | 0.047859581 | 0 | -0.051902224 | 0 |
| 0 | 0            | 0 | 0           | 0 | 0.051479007 | 0 | -0.05355815  | 0 |
| 0 | 0.003889067  | 0 | 0           | 0 | 0.051473265 | 0 | -0.053602417 | 0 |
| 0 | -0.009411508 | 0 | 0           | 0 | 0.050182006 | 0 | -0.052801681 | 0 |
| 0 | -0.026686318 | 0 | -0.23049957 | 0 | 0.26825106  | 0 | 0            | 0 |
| 0 | 0            | 0 | -0.23026302 | 0 | 0.26833355  | 0 | 0            | 0 |
| 0 | -0.013991798 | 0 | 0           | 0 | 0.042935718 | 0 | -0.048658434 | 0 |
| 0 | -0.024243966 | 0 | -0.2224742  | 0 | 0.25941211  | 0 | -0.053079165 | 0 |
| 0 | 0.034119404  | 0 | -0.23013771 | 0 | 0.26818928  | 0 | 0            | 0 |
| 0 | 0            | 0 | -0.24534939 | 0 | 0.26325552  | 0 | -0.054633298 | 0 |
| 0 | 0.064113891  | 0 | -0.24518532 | 0 | 0.26300396  | 0 | -0.054845388 | 0 |
| 0 | -0.015256423 | 0 | -0.2251024  | 0 | 0.26861366  | 0 | 0            | 0 |
| 0 | 0            | 0 | 0           | 0 | 0.049671047 | 0 | -0.054972151 | 0 |
| 0 | -0.027984157 | 0 | 0           | 0 | 0.049015354 | 0 | -0.054445744 | 0 |

|   |              |   |             |             |   |              |   |
|---|--------------|---|-------------|-------------|---|--------------|---|
| 0 | -0.037285314 | 0 | 0           | 0.043972518 | 0 | -0.047698048 | 0 |
| 0 | 0.012094069  | 0 | 0           | 0.04965756  | 0 | -0.055038892 | 0 |
| 0 | -0.013541312 | 0 | 0           | 0.048085963 | 0 | -0.054065837 | 0 |
| 0 | 0            | 0 | -0.2472331  | 0.26145252  | 0 | -0.054426285 | 0 |
| 0 | -0.020536814 | 0 | -0.24762829 | 0.26126583  | 0 | -0.054055868 | 0 |
| 0 | -0.022970079 | 0 | -0.22383259 | 0.26300909  | 0 | 0            | 0 |
| 0 | -0.021087422 | 0 | -0.22389751 | 0.26293905  | 0 | 0            | 0 |
| 0 | 0            | 0 | -0.22383865 | 0.26302928  | 0 | 0            | 0 |
| 0 | 0.071538046  | 0 | -0.24713833 | 0.26112885  | 0 | -0.054594537 | 0 |
| 0 | -0.029078298 | 0 | -0.22578388 | 0.26165185  | 0 | 0            | 0 |
| 0 | 0            | 0 | 0           | 0.050548747 | 0 | -0.054433693 | 0 |
| 0 | -0.040785767 | 0 | 0           | 0.050527419 | 0 | -0.054389018 | 0 |
| 0 | -0.020120633 | 0 | -0.22225246 | 0.26128369  | 0 | 0            | 0 |
| 0 | -0.007607809 | 0 | 0           | 0.049184902 | 0 | -0.053632624 | 0 |
| 0 | -0.01697565  | 0 | 0           | 0.05023753  | 0 | -0.053308508 | 0 |
| 0 | 0            | 0 | 0.029875021 | 0           | 0 | -0.053515209 | 0 |
| 0 | 0            | 0 | 0.029068381 | 0           | 0 | -0.052641512 | 0 |
| 0 | 0.003836468  | 0 | 0.029071085 | 0           | 0 | -0.052681747 | 0 |
| 0 | 0            | 0 | 0.027850665 | 0           | 0 | -0.051708024 | 0 |
| 0 | 0.00890176   | 0 | 0.027779879 | 0           | 0 | -0.051725342 | 0 |
| 0 | -0.017927039 | 0 | 0.024806491 | 0           | 0 | -0.049791535 | 0 |
| 0 | -0.025980409 | 0 | -0.22363456 | 0.26073234  | 0 | 0            | 0 |
| 0 | 0            | 0 | 0.029825438 | 0           | 0 | -0.052194778 | 0 |
| 0 | 0.002434917  | 0 | 0.029822238 | 0           | 0 | -0.05224002  | 0 |
| 0 | -0.014718947 | 0 | 0.028978864 | 0           | 0 | -0.051711812 | 0 |
| 0 | -0.023893892 | 0 | 0           | 0.048563405 | 0 | -0.054854652 | 0 |
| 0 | -0.040388502 | 0 | 0           | 0.041178485 | 0 | -0.048059175 | 0 |
| 0 | -0.033645525 | 0 | 0.024577499 | 0           | 0 | -0.048134451 | 0 |
| 0 | -0.02937672  | 0 | -0.22507699 | 0.2600062   | 0 | 0            | 0 |
| 0 | 0            | 0 | 0.02811362  | 0           | 0 | -0.053561062 | 0 |
| 0 | 0.010230953  | 0 | 0.028106118 | 0           | 0 | -0.05363424  | 0 |
| 0 | -0.02512223  | 0 | 0.029072472 | 0           | 0 | -0.054321067 | 0 |
| 0 | -0.018651932 | 0 | 0.027009165 | 0           | 0 | -0.052948389 | 0 |
| 0 | 0            | 0 | -0.24125062 | 0.25061679  | 0 | -0.062167243 | 0 |
| 0 | -0.02379005  | 0 | 0           | 0           | 0 | -0.051699187 | 0 |
| 0 | -0.024218963 | 0 | 0           | 0           | 0 | -0.052149316 | 0 |
| 0 | 0            | 0 | 0           | 0           | 0 | -0.051809205 | 0 |
| 0 | 0.002971547  | 0 | 0           | 0           | 0 | -0.051860691 | 0 |
| 0 | 0            | 0 | -0.24237959 | 0.25416306  | 0 | -0.051888137 | 0 |
| 0 | -0.019137704 | 0 | -0.24289228 | 0.25393349  | 0 | -0.051451019 | 0 |
| 0 | -0.02620935  | 0 | -0.24131436 | 0.25397445  | 0 | -0.05181676  | 0 |
| 0 | -0.02388438  | 0 | 0           | 0           | 0 | -0.050881474 | 0 |
| 0 | 0.073874248  | 0 | -0.24226754 | 0.25383157  | 0 | -0.052065886 | 0 |
| 0 | -0.026638251 | 0 | 0           | 0.04597881  | 0 | -0.052028648 | 0 |
| 0 | 0            | 0 | 0.029343235 | 0           | 0 | -0.053070963 | 0 |
| 0 | -0.040874399 | 0 | 0.029322572 | 0           | 0 | -0.053029052 | 0 |
| 0 | -0.013433145 | 0 | 0.02843571  | 0           | 0 | -0.052544527 | 0 |

|   |              |   |             |   |             |              |              |
|---|--------------|---|-------------|---|-------------|--------------|--------------|
| 0 | -0.029259387 | 0 | 0           | 0 | 0           | -0.052282381 | 0            |
| 0 | -0.018499124 | 0 | 0.029209576 | 0 | 0           | -0.051988946 | 0            |
| 0 | -0.036808    | 0 | 0.022212796 | 0 | 0           | -0.048242563 | 0            |
| 0 | -0.024615379 | 0 | 0.02757341  | 0 | 0           | -0.053491058 | 0            |
| 0 | -0.02265418  | 0 | 0           | 0 | 0           | -0.051774596 | 0            |
| 0 | -0.022117172 | 0 | 0           | 0 | 0.048305267 | 0            | 0            |
| 0 | 0            | 0 | 0           | 0 | 0.047874584 | 0            | 0            |
| 0 | -0.019904889 | 0 | 0           | 0 | 0.047481375 | 0            | 0            |
| 0 | 0.02257478   | 0 | 0           | 0 | 0.047865089 | 0            | 0            |
| 0 | -0.021991472 | 0 | 0           | 0 | 0.047743444 | 0            | 0            |
| 0 | 0.051062808  | 0 | -0.23341795 | 0 | 0.25563757  | 0            | -0.071856583 |
| 0 | 0            | 0 | -0.23338536 | 0 | 0.25566408  | 0            | -0.07191715  |
| 0 | -0.027756377 | 0 | 0.025203699 | 0 | 0           | 0            | -0.050807555 |
| 0 | -0.030588548 | 0 | -0.23882248 | 0 | 0.25431596  | 0            | 0            |
| 0 | 0            | 0 | -0.23884009 | 0 | 0.25430824  | 0            | 0            |
| 0 | 0.080884215  | 0 | -0.23868711 | 0 | 0.25391787  | 0            | 0            |
| 0 | -0.027905525 | 0 | 0           | 0 | 0.045723607 | 0            | 0            |
| 0 | -0.027456095 | 0 | -0.24114285 | 0 | 0.25254115  | 0            | 0            |
| 0 | -0.020349955 | 0 | 0           | 0 | 0.046717158 | 0            | 0            |
| 0 | 0.02066722   | 0 | -0.23348978 | 0 | 0.25046996  | 0            | -0.067047038 |
| 0 | 0.035774569  | 0 | -0.23603043 | 0 | 0.25213702  | 0            | -0.072132725 |
| 0 | -0.026065245 | 0 | 0.026819413 | 0 | 0           | 0            | 0            |
| 0 | 0            | 0 | 0.026817751 | 0 | 0           | 0            | 0            |
| 0 | 0.020723979  | 0 | 0.026815326 | 0 | 0           | 0            | 0            |
| 0 | 0            | 0 | 0           | 0 | 0.02598435  | 0            | -0.053453036 |
| 0 | -0.019453509 | 0 | 0.028833877 | 0 | 0           | 0            | 0            |
| 0 | 0.061877789  | 0 | 0           | 0 | 0.025798342 | 0            | -0.05361277  |
| 0 | -0.017988077 | 0 | 0           | 0 | 0.024828778 | 0            | -0.052755928 |
| 0 | -0.023376043 | 0 | 0.026777819 | 0 | 0           | 0            | 0            |
| 0 | -0.024447845 | 0 | 0           | 0 | 0.021073785 | 0            | -0.052645985 |
| 0 | -0.02653443  | 0 | 0           | 0 | 0           | 0            | 0            |
| 0 | 0            | 0 | 0.007277142 | 0 | 0           | 0            | -0.052384556 |
| 0 | -0.022552061 | 0 | 0.006548599 | 0 | 0           | 0            | -0.051954447 |
| 0 | -0.02899513  | 0 | 0.024906608 | 0 | 0           | 0            | 0            |
| 0 | 0.055208496  | 0 | 0.007113194 | 0 | 0           | 0            | -0.052530764 |
| 0 | -0.029100937 | 0 | 0           | 0 | 0           | 0            | -0.052050525 |
| 0 | -0.009480264 | 0 | -0.22061386 | 0 | 0.25367275  | 0            | -0.087312778 |
| 0 | -0.027029353 | 0 | -0.23702245 | 0 | 0.24636912  | 0            | 0            |
| 0 | -0.025882663 | 0 | 0.003188678 | 0 | 0           | 0            | -0.051748056 |
| 0 | -0.020435155 | 0 | 0.026210979 | 0 | 0           | 0            | 0            |
| 0 | -0.018417659 | 0 | -0.23414714 | 0 | 0.23649125  | 0            | -0.054256417 |
| 0 | 0            | 0 | -0.23412838 | 0 | 0.23648457  | 0            | -0.054243478 |
| 0 | -0.017111724 | 0 | -0.23474216 | 0 | 0.23619572  | 0            | -0.053716029 |
| 0 | -0.024426375 | 0 | 0           | 0 | 0.019077265 | 0            | -0.050284071 |
| 0 | -0.025501253 | 0 | 0.001256663 | 0 | 0           | 0            | -0.049498122 |
| 0 | 0.025223143  | 0 | 0           | 0 | 0.028980496 | 0            | -0.069274512 |
| 0 | -0.029384573 | 0 | 0           | 0 | 0.022605796 | 0            | 0            |

|   |              |   |              |   |             |              |              |
|---|--------------|---|--------------|---|-------------|--------------|--------------|
| 0 | 0.025210184  | 0 | 0.010959598  | 0 | 0           | -0.068469879 | 0            |
| 0 | -0.02994269  | 0 | 0.004507845  | 0 | 0           | 0            | 0            |
| 0 | 0.024847708  | 0 | -0.22483994  | 0 | 0.23136423  | 0            | -0.069007988 |
| 0 | -0.026370484 | 0 | -0.22837227  | 0 | 0.22764316  | 0            | 0            |
| 0 | -0.013618365 | 0 | -0.23771339  | 0 | 0.21904032  | 0            | -0.051599671 |
| 0 | -0.024151437 | 0 | 0            | 0 | 0.009781972 | 0            | -0.052650554 |
| 0 | -0.025181258 | 0 | -0.006722728 | 0 | 0           | 0            | -0.051818675 |
| 0 | 0.052956138  | 0 | -0.21955282  | 0 | 0.2387095   | 0            | 0            |
| 0 | -0.018540479 | 0 | -0.22765545  | 0 | 0.21486107  | 0            | -0.048917961 |
| 0 | 0            | 0 | -0.23577711  | 0 | 0.27960138  | 0            | -0.056990785 |
| 0 | 0            | 0 | -0.23719306  | 0 | 0.280106    | 0            | -0.055534189 |
| 0 | 0.009200192  | 0 | -0.23714444  | 0 | 0.28006925  | 0            | -0.055585716 |
| 0 | 0            | 0 | -0.23841663  | 0 | 0.27975039  | 0            | -0.05433249  |
| 0 | 0.015573567  | 0 | -0.23840874  | 0 | 0.27964559  | 0            | -0.054350768 |
| 0 | -0.01674392  | 0 | -0.24102159  | 0 | 0.2785691   | 0            | -0.051976316 |
| 0 | 0            | 0 | -0.23486612  | 0 | 0.27863     | 0            | -0.05504731  |
| 0 | 0.007576824  | 0 | -0.23481959  | 0 | 0.27857906  | 0            | -0.055100087 |
| 0 | -0.013560042 | 0 | -0.23554554  | 0 | 0.2782734   | 0            | -0.054446139 |
| 0 | -0.03563159  | 0 | -0.23859293  | 0 | 0.27595724  | 0            | -0.050168432 |
| 0 | -0.026145153 | 0 | -0.23574425  | 0 | 0.27828726  | 0            | -0.057059563 |
| 0 | 0            | 0 | -0.23623894  | 0 | 0.27816371  | 0            | -0.056570027 |
| 0 | 0.015989514  | 0 | -0.23616327  | 0 | 0.27807746  | 0            | -0.05665387  |
| 0 | -0.017464467 | 0 | -0.23708668  | 0 | 0.27769021  | 0            | -0.05583233  |
| 0 | 0            | 0 | -0.22972574  | 0 | 0.27265955  | 0            | -0.055986379 |
| 0 | -0.041020302 | 0 | -0.22974533  | 0 | 0.27264578  | 0            | -0.055938595 |
| 0 | -0.010909858 | 0 | -0.23045124  | 0 | 0.27225605  | 0            | -0.055344695 |
| 0 | -0.017784639 | 0 | -0.22760637  | 0 | 0.27025754  | 0            | -0.054730994 |
| 0 | -0.039026726 | 0 | -0.23389024  | 0 | 0.26830127  | 0            | -0.050317493 |
| 0 | -0.024441324 | 0 | -0.22958101  | 0 | 0.27051411  | 0            | -0.056406561 |
| 0 | -0.027928527 | 0 | -0.23017663  | 0 | 0.26841853  | 0            | -0.053436407 |
| 0 | -0.023049511 | 0 | -0.23062399  | 0 | 0.27073918  | 0            | 0            |
| 0 | 0            | 0 | -0.23058551  | 0 | 0.27079826  | 0            | 0            |
| 0 | 0.026827321  | 0 | -0.23048536  | 0 | 0.27069141  | 0            | 0            |
| 0 | -0.020152938 | 0 | -0.22913029  | 0 | 0.27107921  | 0            | 0            |
| 0 | -0.0231345   | 0 | -0.22942446  | 0 | 0.26952869  | 0            | 0            |
| 0 | 0            | 0 | 0            | 0 | 0.051706066 | 0            | -0.05454361  |
| 0 | 0.005292123  | 0 | 0            | 0 | 0.051698554 | 0            | -0.054580676 |
| 0 | -0.010760765 | 0 | 0            | 0 | 0.05037236  | 0            | -0.053749653 |
| 0 | -0.03107359  | 0 | 0            | 0 | 0.047986851 | 0            | -0.05191029  |
| 0 | -0.020238969 | 0 | 0            | 0 | 0.051468503 | 0            | -0.053554609 |
| 0 | -0.029235117 | 0 | -0.23027792  | 0 | 0.26833597  | 0            | 0            |
| 0 | 0            | 0 | -0.24477118  | 0 | 0.26353327  | 0            | -0.05514437  |
| 0 | -0.021522446 | 0 | -0.24537229  | 0 | 0.26324198  | 0            | -0.05461947  |
| 0 | 0.064150267  | 0 | -0.24466701  | 0 | 0.26323854  | 0            | -0.055307771 |
| 0 | -0.026379783 | 0 | 0            | 0 | 0.049661506 | 0            | -0.054963529 |
| 0 | -0.025903446 | 0 | -0.24724656  | 0 | 0.26145276  | 0            | -0.054422279 |
| 0 | -0.020805707 | 0 | -0.22384475  | 0 | 0.26302484  | 0            | 0            |

|   |              |   |             |             |             |              |              |
|---|--------------|---|-------------|-------------|-------------|--------------|--------------|
| 0 | -0.018994554 | 0 | 0           | 0.050538155 | 0           | -0.054430948 | 0            |
| 0 | 0            | 0 | 0.029915424 | 0           | 0           | -0.05312905  | 0            |
| 0 | 0.003775848  | 0 | 0.029914342 | 0           | 0           | -0.053178719 | 0            |
| 0 | -0.015661913 | 0 | 0.029041719 | 0           | 0           | -0.052630929 | 0            |
| 0 | -0.028294461 | 0 | 0.027880039 | 0           | 0           | -0.051729028 | 0            |
| 0 | -0.021701403 | 0 | 0.029813845 | 0           | 0           | -0.052191101 | 0            |
| 0 | -0.027456073 | 0 | 0.028100679 | 0           | 0           | -0.053565451 | 0            |
| 0 | -0.02548866  | 0 | 0           | 0           | 0           | -0.05180658  | 0            |
| 0 | -0.025413913 | 0 | -0.24239978 | 0           | 0.25417513  | 0            | -0.051884817 |
| 0 | -0.022148354 | 0 | 0.029329728 | 0           | 0           | -0.053059434 | 0            |
| 0 | -0.019945632 | 0 | 0           | 0           | 0.047873811 | 0            | 0            |
| 0 | 0.027841712  | 0 | -0.23341223 | 0           | 0.25568806  | 0            | -0.071868308 |
| 0 | -0.030282833 | 0 | -0.23884865 | 0           | 0.2543075   | 0            | 0            |
| 0 | -0.024611517 | 0 | 0.026805116 | 0           | 0           | 0            | 0            |
| 0 | -0.027883841 | 0 | 0           | 0           | 0.0259728   | 0            | -0.053450159 |
| 0 | -0.028738559 | 0 | 0.007266061 | 0           | 0           | -0.052380677 | 0            |
| 0 | -0.025136239 | 0 | -0.23414856 | 0           | 0.23649486  | 0            | -0.054243709 |
| 0 | 0            | 0 | -0.23650671 | 0           | 0.2804674   | 0            | -0.056133045 |
| 0 | 0.009134791  | 0 | -0.23645977 | 0           | 0.28041652  | 0            | -0.056191348 |
| 0 | -0.014455645 | 0 | -0.23721351 | 0           | 0.28009948  | 0            | -0.055521598 |
| 0 | -0.029458666 | 0 | -0.23839942 | 0           | 0.27976204  | 0            | -0.054358581 |
| 0 | -0.021387175 | 0 | -0.23486928 | 0           | 0.27862087  | 0            | -0.05503873  |
| 0 | -0.027692629 | 0 | -0.2362604  | 0           | 0.27817044  | 0            | -0.056566909 |
| 0 | -0.020009345 | 0 | -0.22973647 | 0           | 0.27264827  | 0            | -0.055978904 |
| 0 | -0.024565354 | 0 | -0.23059758 | 0           | 0.2707978   | 0            | 0            |
| 0 | -0.023627919 | 0 | 0           | 0           | 0.051702892 | 0            | -0.054545191 |
| 0 | -0.028936907 | 0 | -0.24477655 | 0           | 0.26352443  | 0            | -0.055149986 |
| 0 | -0.023318186 | 0 | 0.029903742 | 0           | 0           | -0.05312885  | 0            |
| 0 | -0.023197143 | 0 | -0.23651778 | 0           | 0.2804664   | 0            | -0.056130033 |
